# Supplementary material for: Comparative Genomics Reveal the Utilization Ability of Variable Carbohydrates as Key Genetic Features of Listeria Pathogens in Their Pathogenic Lifestyles
Source: MDPI journal article supplement (doi:10.3390/pathogens11121430), 2022-11-28
Supplement: s1 [file s1]

Table S2. The ratio of homologous between genomes

| Strain A                                                 | Strain B            | Percentage of homologous genes |
|----------------------------------------------------------|---------------------|--------------------------------|
| Listeria_welshimeri_1643                                 | Listeria_grayi_1641 | 0.7021                         |
| Listeria_welshimeri_serovar_6b_str_SLCC5334_386043       | Listeria_grayi_1641 | 0.7019                         |
| Listeria_seeligeri_serovar_1_2b_str_SLCC3954_683837      | Listeria_grayi_1641 | 0.7092                         |
| Listeria_seeligeri_FSL_S4-171_702452                     | Listeria_grayi_1641 | 0.6579                         |
| Listeria_seeligeri_FSL_N1-067_702453                     | Listeria_grayi_1641 | 0.6717                         |
| Listeria_seeligeri_1640_v1                               | Listeria_grayi_1641 | 0.7081                         |
| Listeria_seeligeri_1640                                  | Listeria_grayi_1641 | 0.6948                         |
| Listeria_monocytogenes_WSLC1042_1457188                  | Listeria_grayi_1641 | 0.7077                         |
| Listeria_monocytogenes_WSLC1001_1457187                  | Listeria_grayi_1641 | 0.7108                         |
| Listeria_monocytogenes_SLCC7179_879090                   | Listeria_grayi_1641 | 0.7125                         |
| Listeria_monocytogenes_SLCC5850_882096                   | Listeria_grayi_1641 | 0.7138                         |
| Listeria_monocytogenes_SLCC2755_932919                   | Listeria_grayi_1641 | 0.7053                         |
| Listeria_monocytogenes_SLCC2540_879089                   | Listeria_grayi_1641 | 0.7087                         |
| Listeria_monocytogenes_SLCC2479_882020                   | Listeria_grayi_1641 | 0.7032                         |
| Listeria_monocytogenes_SLCC2378_879088                   | Listeria_grayi_1641 | 0.7088                         |
| Listeria_monocytogenes_SLCC2376_882097                   | Listeria_grayi_1641 | 0.7212                         |
| Listeria_monocytogenes_SLCC2372_932920                   | Listeria_grayi_1641 | 0.7017                         |
| Listeria_monocytogenes_serotype_4b_str_LL195_1230340     | Listeria_grayi_1641 | 0.7121                         |
| Listeria_monocytogenes_serotype_4b_str_LIS0087_1134669   | Listeria_grayi_1641 | 0.6927                         |
| Listeria_monocytogenes_serotype_4b_str_F2365_265669      | Listeria_grayi_1641 | 0.7121                         |
| Listeria_monocytogenes_serotype_4b_str_CLIP_80459_568819 | Listeria_grayi_1641 | 0.7185                         |
| Listeria_monocytogenes_serotype_4b_str_81-0861_1196161   | Listeria_grayi_1641 | 0.7005                         |
| Listeria_monocytogenes_serotype_4b_str_81-0592_1196160   | Listeria_grayi_1641 | 0.7014                         |
| Listeria_monocytogenes_serotype_4b_str_81-0558_1196159   | Listeria_grayi_1641 | 0.702                          |
| Listeria_monocytogenes_serotype_4b_str_10-0809_1196162   | Listeria_grayi_1641 | 0.7014                         |
| Listeria_monocytogenes_serotype_4b_str_02-6680_1196175   | Listeria_grayi_1641 | 0.7128                         |
| Listeria_monocytogenes_serotype_4b_str_02-6679_1196174   | Listeria_grayi_1641 | 0.7128                         |
| Listeria_monocytogenes_serotype_4b_str_02-1792_1196173   | Listeria_grayi_1641 | 0.7025                         |
| Listeria_monocytogenes_serotype_4b_str_02-1289_1196172   | Listeria_grayi_1641 | 0.7025                         |
| Listeria_monocytogenes_serotype_4b_str_02-1103_1196171   | Listeria_grayi_1641 | 0.7025                         |
| Listeria_monocytogenes_serotype_3c_str_10-5027_1196195   | Listeria_grayi_1641 | 0.7027                         |
| Listeria_monocytogenes_serotype_1_2c_str_10-5026_1196194 | Listeria_grayi_1641 | 0.7035                         |
| Listeria_monocytogenes_serotype_1_2c_str_10-5025_1196193 | Listeria_grayi_1641 | 0.7035                         |
| Listeria_monocytogenes_serotype_1_2b_str_10-0811_1196164 | Listeria_grayi_1641 | 0.7002                         |
| Listeria_monocytogenes_serotype_1_2b_str_10-0810_1196163 | Listeria_grayi_1641 | 0.7002                         |
| Listeria_monocytogenes_serotype_1_2a_str_99-6370_1196179 | Listeria_grayi_1641 | 0.6952                         |
| Listeria_monocytogenes_serotype_1_2a_str_98-2035_1196178 | Listeria_grayi_1641 | 0.6952                         |
| Listeria_monocytogenes_serotype_1_2a_str_95-0093_1196177 | Listeria_grayi_1641 | 0.6994                         |
| Listeria_monocytogenes_serotype_1_2a_str_88-0478_1196176 | Listeria_grayi_1641 | 0.6984                         |
| Listeria_monocytogenes_serotype_1_2a_str_10-5024_1196192 | Listeria_grayi_1641 | 0.6997                         |
| Listeria_monocytogenes_serotype_1_2a_str_10-4758_1196168 | Listeria_grayi_1641 | 0.7131                         |
| Listeria_monocytogenes_serotype_1_2a_str_10-4754_1196167 | Listeria_grayi_1641 | 0.7131                         |
| Listeria_monocytogenes_serotype_1_2a_str_10-1321_1196191 | Listeria_grayi_1641 | 0.6997                         |
| Listeria_monocytogenes_serotype_1_2a_str_10-1047_1196190 | Listeria_grayi_1641 | 0.7                            |
| Listeria_monocytogenes_serotype_1_2a_str_10-1046_1196189 | Listeria_grayi_1641 | 0.7                            |
| Listeria_monocytogenes_serotype_1_2a_str_10-0934_1196170 | Listeria_grayi_1641 | 0.7208                         |
| Listeria_monocytogenes_serotype_1_2a_str_10-0933_1196169 | Listeria_grayi_1641 | 0.7208                         |
| Listeria_monocytogenes_serotype_1_2a_str_10-0815_1196188 | Listeria_grayi_1641 | 0.6963                         |
| Listeria_monocytogenes_serotype_1_2a_str_10-0814_1196187 | Listeria_grayi_1641 | 0.6998                         |
| Listeria_monocytogenes_serotype_1_2a_str_10-0813_1196166 | Listeria_grayi_1641 | 0.7075                         |
| Listeria_monocytogenes_serotype_1_2a_str_10-0812_1196165 | Listeria_grayi_1641 | 0.7075                         |
| Listeria_monocytogenes_serotype_1_2a_str_08-7669_1196186 | Listeria_grayi_1641 | 0.7067                         |
| Listeria_monocytogenes_serotype_1_2a_str_08-7374_1196185 | Listeria_grayi_1641 | 0.6997                         |
| Listeria_monocytogenes_serotype_1_2a_str_08-6997_1196184 | Listeria_grayi_1641 | 0.6963                         |
| Listeria_monocytogenes_serotype_1_2a_str_08-6569_1196183 | Listeria_grayi_1641 | 0.6963                         |
| Listeria_monocytogenes_serotype_1_2a_str_08-6056_1196182 | Listeria_grayi_1641 | 0.6963                         |
| Listeria_monocytogenes_serotype_1_2a_str_04-5457_1196181 | Listeria_grayi_1641 | 0.6997                         |
| Listeria_monocytogenes_serotype_1_2a_str_02-5993_1196180 | Listeria_grayi_1641 | 0.6994                         |
| Listeria_monocytogenes_R479a_1437838                     | Listeria_grayi_1641 | 0.7071                         |
| Listeria_monocytogenes_N53-1_1234142                     | Listeria_grayi_1641 | 0.6811                         |
| Listeria_monocytogenes_M7_1030009                        | Listeria_grayi_1641 | 0.6933                         |
| Listeria_monocytogenes_LO28_393132                       | Listeria_grayi_1641 | 0.7021                         |
| Listeria_monocytogenes_L99_563174                        | Listeria_grayi_1641 | 0.6938                         |
| Listeria_monocytogenes_L312_882094                       | Listeria_grayi_1641 | 0.7185                         |
| Listeria_monocytogenes_J1816_930781                      | Listeria_grayi_1641 | 0.6987                         |
| Listeria_monocytogenes_J1-220_930782                     | Listeria_grayi_1641 | 0.698                          |
| Listeria_monocytogenes_J0161_393130                      | Listeria_grayi_1641 | 0.7012                         |
| Listeria_monocytogenes_HCC23_552536                      | Listeria_grayi_1641 | 0.6935                         |
| Listeria_monocytogenes_FSL_R2-561_393126                 | Listeria_grayi_1641 | 0.702                          |
| Listeria_monocytogenes_FSL_J1-208_393119                 | Listeria_grayi_1641 | 0.7082                         |
| Listeria_monocytogenes_FSL_J1-175_393118                 | Listeria_grayi_1641 | 0.7076                         |
| Listeria_monocytogenes_Finland_1998_393127               | Listeria_grayi_1641 | 0.7167                         |
| Listeria_monocytogenes_EGD-e_169963_v1                   | Listeria_grayi_1641 | 0.7096                         |
| Listeria_monocytogenes_EGD-e_169963                      | Listeria_grayi_1641 | 0.71                           |
| Listeria_monocytogenes_EGD_1334565                       | Listeria_grayi_1641 | 0.7145                         |
| Listeria_monocytogenes_CFSAN002349_1299895               | Listeria_grayi_1641 | 0.7147                         |
| Listeria_monocytogenes_ATCC_19117_882095_v1              | Listeria_grayi_1641 | 0.7124                         |
| Listeria_monocytogenes_ATCC_19117_882095                 | Listeria_grayi_1641 | 0.7123                         |
| Listeria_monocytogenes_6179_1288295                      | Listeria_grayi_1641 | 0.6994                         |
| Listeria_monocytogenes_1639_v9                           | Listeria_grayi_1641 | 0.6861                         |
| Listeria_monocytogenes_1639_v99                          | Listeria_grayi_1641 | 0.7047                         |
| Listeria_monocytogenes_1639_v98                          | Listeria_grayi_1641 | 0.704                          |
| Listeria_monocytogenes_1639_v97                          | Listeria_grayi_1641 | 0.705                          |
| Listeria_monocytogenes_1639_v96                          | Listeria_grayi_1641 | 0.7022                         |
| Listeria_monocytogenes_1639_v95                          | Listeria_grayi_1641 | 0.7023                         |
| Listeria_monocytogenes_1639_v94                          | Listeria_grayi_1641 | 0.7025                         |
| Listeria_monocytogenes_1639_v93                          | Listeria_grayi_1641 | 0.7066                         |
| Listeria_monocytogenes_1639_v92                          | Listeria_grayi_1641 | 0.7036                         |

[illegible]

[illegible]

|                                                          |                        |        |
|----------------------------------------------------------|------------------------|--------|
| Listeria_monocytogenes_1639_v106                         | Listeria_grayi_1641    | 0.7116 |
| Listeria_monocytogenes_1639_v105                         | Listeria_grayi_1641    | 0.7116 |
| Listeria_monocytogenes_1639_v104                         | Listeria_grayi_1641    | 0.7118 |
| Listeria_monocytogenes_1639_v103                         | Listeria_grayi_1641    | 0.7118 |
| Listeria_monocytogenes_1639_v102                         | Listeria_grayi_1641    | 0.7059 |
| Listeria_monocytogenes_1639_v101                         | Listeria_grayi_1641    | 0.7071 |
| Listeria_monocytogenes_1639_v100                         | Listeria_grayi_1641    | 0.7066 |
| Listeria_monocytogenes_1639                              | Listeria_grayi_1641    | 0.7216 |
| Listeria_monocytogenes_10403S_393133                     | Listeria_grayi_1641    | 0.7159 |
| Listeria_monocytogenes_08-5923_637381                    | Listeria_grayi_1641    | 0.6997 |
| Listeria_monocytogenes_08-5578_653938                    | Listeria_grayi_1641    | 0.698  |
| Listeria_monocytogenes_07PF0776_1126011                  | Listeria_grayi_1641    | 0.7114 |
| Listeria_marthii_FSL_S4-120_702457                       | Listeria_grayi_1641    | 0.675  |
| Listeria_marthii_529731_v1                               | Listeria_grayi_1641    | 0.6993 |
| Listeria_marthii_529731                                  | Listeria_grayi_1641    | 0.7076 |
| Listeria_ivanovii_WSLC3009_1457190                       | Listeria_grayi_1641    | 0.7074 |
| Listeria_ivanovii_subsp_londoniensis_202752_v2           | Listeria_grayi_1641    | 0.7062 |
| Listeria_ivanovii_subsp_londoniensis_202752_v1           | Listeria_grayi_1641    | 0.6972 |
| Listeria_ivanovii_subsp_londoniensis_202752              | Listeria_grayi_1641    | 0.7017 |
| Listeria_ivanovii_subsp_ivanovii_PAM_55_881621           | Listeria_grayi_1641    | 0.7067 |
| Listeria_ivanovii_subsp_ivanovii_202751_v2               | Listeria_grayi_1641    | 0.708  |
| Listeria_ivanovii_subsp_ivanovii_202751_v1               | Listeria_grayi_1641    | 0.708  |
| Listeria_ivanovii_subsp_ivanovii_202751                  | Listeria_grayi_1641    | 0.708  |
| Listeria_ivanovii_FSL_F6-596_702454                      | Listeria_grayi_1641    | 0.6529 |
| Listeria_ivanovii_1638                                   | Listeria_grayi_1641    | 0.7077 |
| Listeria_innocua_FSL_S4-378_702456                       | Listeria_grayi_1641    | 0.648  |
| Listeria_innocua_FSL_J1-023_702455                       | Listeria_grayi_1641    | 0.6805 |
| Listeria_innocua_Clip11262_272626                        | Listeria_grayi_1641    | 0.6909 |
| Listeria_innocua_1642_v4                                 | Listeria_grayi_1641    | 0.6922 |
| Listeria_innocua_1642_v3                                 | Listeria_grayi_1641    | 0.7061 |
| Listeria_innocua_1642_v2                                 | Listeria_grayi_1641    | 0.7071 |
| Listeria_innocua_1642_v1                                 | Listeria_grayi_1641    | 0.71   |
| Listeria_innocua_1642                                    | Listeria_grayi_1641    | 0.706  |
| Listeria_grayi_DSM_20601_525367                          | Listeria_grayi_1641    | 1      |
| Listeria_grayi_1641_v2                                   | Listeria_grayi_1641    | 0.9062 |
| Listeria_grayi_1641_v1                                   | Listeria_grayi_1641    | 0.8932 |
| Listeria_grayi_1641                                      | Listeria_grayi_1641    | 0.0533 |
| Listeria_welshimeri_1643                                 | Listeria_grayi_1641_v1 | 0.6674 |
| Listeria_welshimeri_serovar_6b_str_SLCC5334_386043       | Listeria_grayi_1641_v1 | 0.6673 |
| Listeria_seeligeri_serovar_1_2b_str_SLCC3954_683837      | Listeria_grayi_1641_v1 | 0.6731 |
| Listeria_seeligeri_FSL_S4-171_702452                     | Listeria_grayi_1641_v1 | 0.6219 |
| Listeria_seeligeri_FSL_N1-067_702453                     | Listeria_grayi_1641_v1 | 0.6286 |
| Listeria_seeligeri_1640_v1                               | Listeria_grayi_1641_v1 | 0.6705 |
| Listeria_seeligeri_1640                                  | Listeria_grayi_1641_v1 | 0.6609 |
| Listeria_monocytogenes_WSLC1042_1457188                  | Listeria_grayi_1641_v1 | 0.675  |
| Listeria_monocytogenes_WSLC1001_1457187                  | Listeria_grayi_1641_v1 | 0.6728 |
| Listeria_monocytogenes_SLCC7179_879090                   | Listeria_grayi_1641_v1 | 0.6759 |
| Listeria_monocytogenes_SLCC5850_882096                   | Listeria_grayi_1641_v1 | 0.6755 |
| Listeria_monocytogenes_SLCC2755_932919                   | Listeria_grayi_1641_v1 | 0.6718 |
| Listeria_monocytogenes_SLCC2540_879089                   | Listeria_grayi_1641_v1 | 0.6776 |
| Listeria_monocytogenes_SLCC2479_882020                   | Listeria_grayi_1641_v1 | 0.6699 |
| Listeria_monocytogenes_SLCC2378_879088                   | Listeria_grayi_1641_v1 | 0.6756 |
| Listeria_monocytogenes_SLCC2376_882097                   | Listeria_grayi_1641_v1 | 0.6837 |
| Listeria_monocytogenes_SLCC2372_932920                   | Listeria_grayi_1641_v1 | 0.6688 |
| Listeria_monocytogenes_serotype_4b_str_LL195_1230340     | Listeria_grayi_1641_v1 | 0.6773 |
| Listeria_monocytogenes_serotype_4b_str_LIS0087_1134669   | Listeria_grayi_1641_v1 | 0.6563 |
| Listeria_monocytogenes_serotype_4b_str_F2365_265669      | Listeria_grayi_1641_v1 | 0.6769 |
| Listeria_monocytogenes_serotype_4b_str_CLIP_80459_568819 | Listeria_grayi_1641_v1 | 0.6804 |
| Listeria_monocytogenes_serotype_4b_str_81-0861_1196161   | Listeria_grayi_1641_v1 | 0.6695 |
| Listeria_monocytogenes_serotype_4b_str_81-0592_1196160   | Listeria_grayi_1641_v1 | 0.6704 |
| Listeria_monocytogenes_serotype_4b_str_81-0558_1196159   | Listeria_grayi_1641_v1 | 0.6709 |
| Listeria_monocytogenes_serotype_4b_str_10-0809_1196162   | Listeria_grayi_1641_v1 | 0.6704 |
| Listeria_monocytogenes_serotype_4b_str_02-6680_1196175   | Listeria_grayi_1641_v1 | 0.6746 |
| Listeria_monocytogenes_serotype_4b_str_02-6679_1196174   | Listeria_grayi_1641_v1 | 0.6746 |
| Listeria_monocytogenes_serotype_4b_str_02-1792_1196173   | Listeria_grayi_1641_v1 | 0.6695 |
| Listeria_monocytogenes_serotype_4b_str_02-1289_1196172   | Listeria_grayi_1641_v1 | 0.6695 |
| Listeria_monocytogenes_serotype_4b_str_02-1103_1196171   | Listeria_grayi_1641_v1 | 0.6695 |
| Listeria_monocytogenes_serotype_3c_str_10-5027_1196195   | Listeria_grayi_1641_v1 | 0.6687 |
| Listeria_monocytogenes_serotype_1_2c_str_10-5026_1196194 | Listeria_grayi_1641_v1 | 0.6694 |
| Listeria_monocytogenes_serotype_1_2c_str_10-5025_1196193 | Listeria_grayi_1641_v1 | 0.6694 |
| Listeria_monocytogenes_serotype_1_2b_str_10-0811_1196164 | Listeria_grayi_1641_v1 | 0.6657 |
| Listeria_monocytogenes_serotype_1_2b_str_10-0810_1196163 | Listeria_grayi_1641_v1 | 0.6657 |
| Listeria_monocytogenes_serotype_1_2a_str_99-6370_1196179 | Listeria_grayi_1641_v1 | 0.6594 |
| Listeria_monocytogenes_serotype_1_2a_str_98-2035_1196178 | Listeria_grayi_1641_v1 | 0.6594 |
| Listeria_monocytogenes_serotype_1_2a_str_95-0093_1196177 | Listeria_grayi_1641_v1 | 0.6628 |
| Listeria_monocytogenes_serotype_1_2a_str_88-0478_1196176 | Listeria_grayi_1641_v1 | 0.6618 |
| Listeria_monocytogenes_serotype_1_2a_str_10-5024_1196192 | Listeria_grayi_1641_v1 | 0.6631 |
| Listeria_monocytogenes_serotype_1_2a_str_10-4758_1196168 | Listeria_grayi_1641_v1 | 0.6745 |
| Listeria_monocytogenes_serotype_1_2a_str_10-4754_1196167 | Listeria_grayi_1641_v1 | 0.6745 |
| Listeria_monocytogenes_serotype_1_2a_str_10-1321_1196191 | Listeria_grayi_1641_v1 | 0.6631 |
| Listeria_monocytogenes_serotype_1_2a_str_10-1047_1196190 | Listeria_grayi_1641_v1 | 0.6633 |
| Listeria_monocytogenes_serotype_1_2a_str_10-1046_1196189 | Listeria_grayi_1641_v1 | 0.6633 |
| Listeria_monocytogenes_serotype_1_2a_str_10-0934_1196170 | Listeria_grayi_1641_v1 | 0.6817 |
| Listeria_monocytogenes_serotype_1_2a_str_10-0933_1196169 | Listeria_grayi_1641_v1 | 0.6817 |
| Listeria_monocytogenes_serotype_1_2a_str_10-0815_1196188 | Listeria_grayi_1641_v1 | 0.66   |
| Listeria_monocytogenes_serotype_1_2a_str_10-0814_1196187 | Listeria_grayi_1641_v1 | 0.6632 |
| Listeria_monocytogenes_serotype_1_2a_str_10-0813_1196166 | Listeria_grayi_1641_v1 | 0.6713 |
| Listeria_monocytogenes_serotype_1_2a_str_10-0812_1196165 | Listeria_grayi_1641_v1 | 0.6713 |
| Listeria_monocytogenes_serotype_1_2a_str_08-7669_1196186 | Listeria_grayi_1641_v1 | 0.6694 |
| Listeria_monocytogenes_serotype_1_2a_str_08-7374_1196185 | Listeria_grayi_1641_v1 | 0.6631 |
| Listeria_monocytogenes_serotype_1_2a_str_08-6997_1196184 | Listeria_grayi_1641_v1 | 0.66   |



|                                                          |                        |        |
|----------------------------------------------------------|------------------------|--------|
| Listeria_monocytogenes_serotype_1_2a_str_08-6569_1196183 | Listeria_grayi_1641_v1 | 0.66   |
| Listeria_monocytogenes_serotype_1_2a_str_08-6056_1196182 | Listeria_grayi_1641_v1 | 0.66   |
| Listeria_monocytogenes_serotype_1_2a_str_04-5457_1196181 | Listeria_grayi_1641_v1 | 0.6631 |
| Listeria_monocytogenes_serotype_1_2a_str_02-5993_1196180 | Listeria_grayi_1641_v1 | 0.6628 |
| Listeria_monocytogenes_R479a_1437838                     | Listeria_grayi_1641_v1 | 0.666  |
| Listeria_monocytogenes_N53-1_1234142                     | Listeria_grayi_1641_v1 | 0.6504 |
| Listeria_monocytogenes_M7_1030009                        | Listeria_grayi_1641_v1 | 0.66   |
| Listeria_monocytogenes_LO28_393132                       | Listeria_grayi_1641_v1 | 0.6678 |
| Listeria_monocytogenes_L99_563174                        | Listeria_grayi_1641_v1 | 0.6605 |
| Listeria_monocytogenes_L312_882094                       | Listeria_grayi_1641_v1 | 0.6804 |
| Listeria_monocytogenes_J1816_930781                      | Listeria_grayi_1641_v1 | 0.6672 |
| Listeria_monocytogenes_J1-220_930782                     | Listeria_grayi_1641_v1 | 0.6641 |
| Listeria_monocytogenes_J0161_393130                      | Listeria_grayi_1641_v1 | 0.6669 |
| Listeria_monocytogenes_HCC23_552536                      | Listeria_grayi_1641_v1 | 0.6603 |
| Listeria_monocytogenes_FSL_R2-561_393126                 | Listeria_grayi_1641_v1 | 0.6684 |
| Listeria_monocytogenes_FSL_J1-208_393119                 | Listeria_grayi_1641_v1 | 0.6686 |
| Listeria_monocytogenes_FSL_J1-175_393118                 | Listeria_grayi_1641_v1 | 0.6737 |
| Listeria_monocytogenes_Finland_1998_393127               | Listeria_grayi_1641_v1 | 0.6789 |
| Listeria_monocytogenes_EGD-e_169963_v1                   | Listeria_grayi_1641_v1 | 0.6757 |
| Listeria_monocytogenes_EGD-e_169963                      | Listeria_grayi_1641_v1 | 0.6761 |
| Listeria_monocytogenes_EGD_1334565                       | Listeria_grayi_1641_v1 | 0.6761 |
| Listeria_monocytogenes_CFSAN002349_1299895               | Listeria_grayi_1641_v1 | 0.6773 |
| Listeria_monocytogenes_ATCC_19117_882095_v1              | Listeria_grayi_1641_v1 | 0.6766 |
| Listeria_monocytogenes_ATCC_19117_882095                 | Listeria_grayi_1641_v1 | 0.6765 |
| Listeria_monocytogenes_6179_1288295                      | Listeria_grayi_1641_v1 | 0.6627 |
| Listeria_monocytogenes_1639_v9                           | Listeria_grayi_1641_v1 | 0.6549 |
| Listeria_monocytogenes_1639_v99                          | Listeria_grayi_1641_v1 | 0.6684 |
| Listeria_monocytogenes_1639_v98                          | Listeria_grayi_1641_v1 | 0.668  |
| Listeria_monocytogenes_1639_v97                          | Listeria_grayi_1641_v1 | 0.6699 |
| Listeria_monocytogenes_1639_v96                          | Listeria_grayi_1641_v1 | 0.6672 |
| Listeria_monocytogenes_1639_v95                          | Listeria_grayi_1641_v1 | 0.6677 |
| Listeria_monocytogenes_1639_v94                          | Listeria_grayi_1641_v1 | 0.6675 |
| Listeria_monocytogenes_1639_v93                          | Listeria_grayi_1641_v1 | 0.6693 |
| Listeria_monocytogenes_1639_v92                          | Listeria_grayi_1641_v1 | 0.6678 |
| Listeria_monocytogenes_1639_v91                          | Listeria_grayi_1641_v1 | 0.6653 |
| Listeria_monocytogenes_1639_v90                          | Listeria_grayi_1641_v1 | 0.668  |
| Listeria_monocytogenes_1639_v8                           | Listeria_grayi_1641_v1 | 0.6631 |
| Listeria_monocytogenes_1639_v89                          | Listeria_grayi_1641_v1 | 0.6742 |
| Listeria_monocytogenes_1639_v88                          | Listeria_grayi_1641_v1 | 0.6717 |
| Listeria_monocytogenes_1639_v87                          | Listeria_grayi_1641_v1 | 0.6677 |
| Listeria_monocytogenes_1639_v86                          | Listeria_grayi_1641_v1 | 0.6674 |
| Listeria_monocytogenes_1639_v85                          | Listeria_grayi_1641_v1 | 0.6688 |
| Listeria_monocytogenes_1639_v84                          | Listeria_grayi_1641_v1 | 0.6719 |
| Listeria_monocytogenes_1639_v83                          | Listeria_grayi_1641_v1 | 0.6695 |
| Listeria_monocytogenes_1639_v82                          | Listeria_grayi_1641_v1 | 0.669  |
| Listeria_monocytogenes_1639_v81                          | Listeria_grayi_1641_v1 | 0.6678 |
| Listeria_monocytogenes_1639_v80                          | Listeria_grayi_1641_v1 | 0.67   |
| Listeria_monocytogenes_1639_v7                           | Listeria_grayi_1641_v1 | 0.6631 |
| Listeria_monocytogenes_1639_v79                          | Listeria_grayi_1641_v1 | 0.6663 |
| Listeria_monocytogenes_1639_v78                          | Listeria_grayi_1641_v1 | 0.6673 |
| Listeria_monocytogenes_1639_v77                          | Listeria_grayi_1641_v1 | 0.6717 |
| Listeria_monocytogenes_1639_v76                          | Listeria_grayi_1641_v1 | 0.6623 |
| Listeria_monocytogenes_1639_v75                          | Listeria_grayi_1641_v1 | 0.6605 |
| Listeria_monocytogenes_1639_v74                          | Listeria_grayi_1641_v1 | 0.6719 |
| Listeria_monocytogenes_1639_v73                          | Listeria_grayi_1641_v1 | 0.668  |
| Listeria_monocytogenes_1639_v72                          | Listeria_grayi_1641_v1 | 0.668  |
| Listeria_monocytogenes_1639_v71                          | Listeria_grayi_1641_v1 | 0.6636 |
| Listeria_monocytogenes_1639_v70                          | Listeria_grayi_1641_v1 | 0.6685 |
| Listeria_monocytogenes_1639_v6                           | Listeria_grayi_1641_v1 | 0.6626 |
| Listeria_monocytogenes_1639_v69                          | Listeria_grayi_1641_v1 | 0.6707 |
| Listeria_monocytogenes_1639_v68                          | Listeria_grayi_1641_v1 | 0.6729 |
| Listeria_monocytogenes_1639_v67                          | Listeria_grayi_1641_v1 | 0.6685 |
| Listeria_monocytogenes_1639_v66                          | Listeria_grayi_1641_v1 | 0.6733 |
| Listeria_monocytogenes_1639_v65                          | Listeria_grayi_1641_v1 | 0.6658 |
| Listeria_monocytogenes_1639_v64                          | Listeria_grayi_1641_v1 | 0.6735 |
| Listeria_monocytogenes_1639_v63                          | Listeria_grayi_1641_v1 | 0.6713 |
| Listeria_monocytogenes_1639_v62                          | Listeria_grayi_1641_v1 | 0.6652 |
| Listeria_monocytogenes_1639_v61                          | Listeria_grayi_1641_v1 | 0.6653 |
| Listeria_monocytogenes_1639_v60                          | Listeria_grayi_1641_v1 | 0.668  |
| Listeria_monocytogenes_1639_v5                           | Listeria_grayi_1641_v1 | 0.6512 |
| Listeria_monocytogenes_1639_v59                          | Listeria_grayi_1641_v1 | 0.6697 |
| Listeria_monocytogenes_1639_v58                          | Listeria_grayi_1641_v1 | 0.6717 |
| Listeria_monocytogenes_1639_v57                          | Listeria_grayi_1641_v1 | 0.6637 |
| Listeria_monocytogenes_1639_v56                          | Listeria_grayi_1641_v1 | 0.6709 |
| Listeria_monocytogenes_1639_v55                          | Listeria_grayi_1641_v1 | 0.6635 |
| Listeria_monocytogenes_1639_v54                          | Listeria_grayi_1641_v1 | 0.6736 |
| Listeria_monocytogenes_1639_v53                          | Listeria_grayi_1641_v1 | 0.6748 |
| Listeria_monocytogenes_1639_v52                          | Listeria_grayi_1641_v1 | 0.666  |
| Listeria_monocytogenes_1639_v51                          | Listeria_grayi_1641_v1 | 0.669  |
| Listeria_monocytogenes_1639_v50                          | Listeria_grayi_1641_v1 | 0.6623 |
| Listeria_monocytogenes_1639_v4                           | Listeria_grayi_1641_v1 | 0.6559 |
| Listeria_monocytogenes_1639_v49                          | Listeria_grayi_1641_v1 | 0.669  |
| Listeria_monocytogenes_1639_v48                          | Listeria_grayi_1641_v1 | 0.6659 |
| Listeria_monocytogenes_1639_v47                          | Listeria_grayi_1641_v1 | 0.6628 |
| Listeria_monocytogenes_1639_v46                          | Listeria_grayi_1641_v1 | 0.6728 |
| Listeria_monocytogenes_1639_v45                          | Listeria_grayi_1641_v1 | 0.6608 |
| Listeria_monocytogenes_1639_v44                          | Listeria_grayi_1641_v1 | 0.6631 |
| Listeria_monocytogenes_1639_v43                          | Listeria_grayi_1641_v1 | 0.6631 |
| Listeria_monocytogenes_1639_v42                          | Listeria_grayi_1641_v1 | 0.6658 |
| Listeria_monocytogenes_1639_v41                          | Listeria_grayi_1641_v1 | 0.6587 |
| Listeria_monocytogenes_1639_v40                          | Listeria_grayi_1641_v1 | 0.6699 |

[illegible]

|                                                          |                        |        |
|----------------------------------------------------------|------------------------|--------|
| Listeria_monocytogenes_1639_v137                         | Listeria_grayi_1641_v1 | 0.6798 |
| Listeria_monocytogenes_1639_v136                         | Listeria_grayi_1641_v1 | 0.6724 |
| Listeria_monocytogenes_1639_v135                         | Listeria_grayi_1641_v1 | 0.6714 |
| Listeria_monocytogenes_1639_v134                         | Listeria_grayi_1641_v1 | 0.6751 |
| Listeria_monocytogenes_1639_v133                         | Listeria_grayi_1641_v1 | 0.6746 |
| Listeria_monocytogenes_1639_v132                         | Listeria_grayi_1641_v1 | 0.6646 |
| Listeria_monocytogenes_1639_v131                         | Listeria_grayi_1641_v1 | 0.6704 |
| Listeria_monocytogenes_1639_v130                         | Listeria_grayi_1641_v1 | 0.6733 |
| Listeria_monocytogenes_1639_v12                          | Listeria_grayi_1641_v1 | 0.6583 |
| Listeria_monocytogenes_1639_v129                         | Listeria_grayi_1641_v1 | 0.6809 |
| Listeria_monocytogenes_1639_v128                         | Listeria_grayi_1641_v1 | 0.6796 |
| Listeria_monocytogenes_1639_v127                         | Listeria_grayi_1641_v1 | 0.6738 |
| Listeria_monocytogenes_1639_v126                         | Listeria_grayi_1641_v1 | 0.6792 |
| Listeria_monocytogenes_1639_v125                         | Listeria_grayi_1641_v1 | 0.6769 |
| Listeria_monocytogenes_1639_v124                         | Listeria_grayi_1641_v1 | 0.6718 |
| Listeria_monocytogenes_1639_v123                         | Listeria_grayi_1641_v1 | 0.6773 |
| Listeria_monocytogenes_1639_v122                         | Listeria_grayi_1641_v1 | 0.6775 |
| Listeria_monocytogenes_1639_v121                         | Listeria_grayi_1641_v1 | 0.6775 |
| Listeria_monocytogenes_1639_v120                         | Listeria_grayi_1641_v1 | 0.6773 |
| Listeria_monocytogenes_1639_v11                          | Listeria_grayi_1641_v1 | 0.659  |
| Listeria_monocytogenes_1639_v119                         | Listeria_grayi_1641_v1 | 0.6775 |
| Listeria_monocytogenes_1639_v118                         | Listeria_grayi_1641_v1 | 0.6775 |
| Listeria_monocytogenes_1639_v117                         | Listeria_grayi_1641_v1 | 0.6738 |
| Listeria_monocytogenes_1639_v116                         | Listeria_grayi_1641_v1 | 0.6751 |
| Listeria_monocytogenes_1639_v115                         | Listeria_grayi_1641_v1 | 0.6753 |
| Listeria_monocytogenes_1639_v114                         | Listeria_grayi_1641_v1 | 0.6712 |
| Listeria_monocytogenes_1639_v113                         | Listeria_grayi_1641_v1 | 0.6765 |
| Listeria_monocytogenes_1639_v112                         | Listeria_grayi_1641_v1 | 0.6726 |
| Listeria_monocytogenes_1639_v111                         | Listeria_grayi_1641_v1 | 0.6739 |
| Listeria_monocytogenes_1639_v110                         | Listeria_grayi_1641_v1 | 0.6722 |
| Listeria_monocytogenes_1639_v10                          | Listeria_grayi_1641_v1 | 0.6564 |
| Listeria_monocytogenes_1639_v109                         | Listeria_grayi_1641_v1 | 0.6714 |
| Listeria_monocytogenes_1639_v108                         | Listeria_grayi_1641_v1 | 0.6712 |
| Listeria_monocytogenes_1639_v107                         | Listeria_grayi_1641_v1 | 0.6759 |
| Listeria_monocytogenes_1639_v106                         | Listeria_grayi_1641_v1 | 0.6759 |
| Listeria_monocytogenes_1639_v105                         | Listeria_grayi_1641_v1 | 0.6759 |
| Listeria_monocytogenes_1639_v104                         | Listeria_grayi_1641_v1 | 0.6761 |
| Listeria_monocytogenes_1639_v103                         | Listeria_grayi_1641_v1 | 0.6761 |
| Listeria_monocytogenes_1639_v102                         | Listeria_grayi_1641_v1 | 0.67   |
| Listeria_monocytogenes_1639_v101                         | Listeria_grayi_1641_v1 | 0.666  |
| Listeria_monocytogenes_1639_v100                         | Listeria_grayi_1641_v1 | 0.6657 |
| Listeria_monocytogenes_1639                              | Listeria_grayi_1641_v1 | 0.6823 |
| Listeria_monocytogenes_10403S_393133                     | Listeria_grayi_1641_v1 | 0.678  |
| Listeria_monocytogenes_08-5923_637381                    | Listeria_grayi_1641_v1 | 0.6631 |
| Listeria_monocytogenes_08-5578_653938                    | Listeria_grayi_1641_v1 | 0.6577 |
| Listeria_monocytogenes_07PF0776_1126011                  | Listeria_grayi_1641_v1 | 0.6763 |
| Listeria_marthii_FSL_S4-120_702457                       | Listeria_grayi_1641_v1 | 0.6379 |
| Listeria_marthii_529731_v1                               | Listeria_grayi_1641_v1 | 0.6619 |
| Listeria_marthii_529731                                  | Listeria_grayi_1641_v1 | 0.6677 |
| Listeria_ivanovii_WSLC3009_1457190                       | Listeria_grayi_1641_v1 | 0.6711 |
| Listeria_ivanovii_subsp_londoniensis_202752_v2           | Listeria_grayi_1641_v1 | 0.6711 |
| Listeria_ivanovii_subsp_londoniensis_202752_v1           | Listeria_grayi_1641_v1 | 0.6619 |
| Listeria_ivanovii_subsp_londoniensis_202752              | Listeria_grayi_1641_v1 | 0.6674 |
| Listeria_ivanovii_subsp_ivanovii_PAM_55_881621           | Listeria_grayi_1641_v1 | 0.6701 |
| Listeria_ivanovii_subsp_ivanovii_202751_v2               | Listeria_grayi_1641_v1 | 0.6712 |
| Listeria_ivanovii_subsp_ivanovii_202751_v1               | Listeria_grayi_1641_v1 | 0.6712 |
| Listeria_ivanovii_subsp_ivanovii_202751                  | Listeria_grayi_1641_v1 | 0.6712 |
| Listeria_ivanovii_FSL_F6-596_702454                      | Listeria_grayi_1641_v1 | 0.6204 |
| Listeria_ivanovii_1638                                   | Listeria_grayi_1641_v1 | 0.6717 |
| Listeria_innocua_FSL_S4-378_702456                       | Listeria_grayi_1641_v1 | 0.6145 |
| Listeria_innocua_FSL_J1-023_702455                       | Listeria_grayi_1641_v1 | 0.6442 |
| Listeria_innocua_Clip11262_272626                        | Listeria_grayi_1641_v1 | 0.6568 |
| Listeria_innocua_1642_v4                                 | Listeria_grayi_1641_v1 | 0.6573 |
| Listeria_innocua_1642_v3                                 | Listeria_grayi_1641_v1 | 0.6729 |
| Listeria_innocua_1642_v2                                 | Listeria_grayi_1641_v1 | 0.6715 |
| Listeria_innocua_1642_v1                                 | Listeria_grayi_1641_v1 | 0.6748 |
| Listeria_innocua_1642                                    | Listeria_grayi_1641_v1 | 0.6724 |
| Listeria_grayi_DSM_20601_525367                          | Listeria_grayi_1641_v1 | 0.8932 |
| Listeria_grayi_1641_v2                                   | Listeria_grayi_1641_v1 | 0.8612 |
| Listeria_grayi_1641_v1                                   | Listeria_grayi_1641_v1 | 0.0951 |
| Listeria_welshimeri_1643                                 | Listeria_grayi_1641_v2 | 0.7038 |
| Listeria_welshimeri_serovar_6b_str_SLCC5334_386043       | Listeria_grayi_1641_v2 | 0.7036 |
| Listeria_seeligeri_serovar_1_2b_str_SLCC3954_683837      | Listeria_grayi_1641_v2 | 0.7089 |
| Listeria_seeligeri_FSL_S4-171_702452                     | Listeria_grayi_1641_v2 | 0.6549 |
| Listeria_seeligeri_FSL_N1-067_702453                     | Listeria_grayi_1641_v2 | 0.6549 |
| Listeria_seeligeri_1640_v1                               | Listeria_grayi_1641_v2 | 0.7094 |
| Listeria_seeligeri_1640                                  | Listeria_grayi_1641_v2 | 0.6934 |
| Listeria_monocytogenes_WSLC1042_1457188                  | Listeria_grayi_1641_v2 | 0.7125 |
| Listeria_monocytogenes_WSLC1001_1457187                  | Listeria_grayi_1641_v2 | 0.7124 |
| Listeria_monocytogenes_SLCC7179_879090                   | Listeria_grayi_1641_v2 | 0.7164 |
| Listeria_monocytogenes_SLCC5850_882096                   | Listeria_grayi_1641_v2 | 0.7154 |
| Listeria_monocytogenes_SLCC2755_932919                   | Listeria_grayi_1641_v2 | 0.7077 |
| Listeria_monocytogenes_SLCC2540_879089                   | Listeria_grayi_1641_v2 | 0.7151 |
| Listeria_monocytogenes_SLCC2479_882020                   | Listeria_grayi_1641_v2 | 0.7056 |
| Listeria_monocytogenes_SLCC2378_879088                   | Listeria_grayi_1641_v2 | 0.7136 |
| Listeria_monocytogenes_SLCC2376_882097                   | Listeria_grayi_1641_v2 | 0.722  |
| Listeria_monocytogenes_SLCC2372_932920                   | Listeria_grayi_1641_v2 | 0.7022 |
| Listeria_monocytogenes_serotype_4b_str_LL195_1230340     | Listeria_grayi_1641_v2 | 0.7156 |
| Listeria_monocytogenes_serotype_4b_str_LIS0087_1134669   | Listeria_grayi_1641_v2 | 0.6946 |
| Listeria_monocytogenes_serotype_4b_str_F2365_265669      | Listeria_grayi_1641_v2 | 0.7156 |
| Listeria_monocytogenes_serotype_4b_str_CLIP_80459_568819 | Listeria_grayi_1641_v2 | 0.7216 |

|                                                          |                        |        |
|----------------------------------------------------------|------------------------|--------|
| Listeria_monocytogenes_serotype_4b_str_81-0861_1196161   | Listeria_grayi_1641_v2 | 0.7053 |
| Listeria_monocytogenes_serotype_4b_str_81-0592_1196160   | Listeria_grayi_1641_v2 | 0.7062 |
| Listeria_monocytogenes_serotype_4b_str_81-0558_1196159   | Listeria_grayi_1641_v2 | 0.7068 |
| Listeria_monocytogenes_serotype_4b_str_10-0809_1196162   | Listeria_grayi_1641_v2 | 0.7062 |
| Listeria_monocytogenes_serotype_4b_str_02-6680_1196175   | Listeria_grayi_1641_v2 | 0.7168 |
| Listeria_monocytogenes_serotype_4b_str_02-6679_1196174   | Listeria_grayi_1641_v2 | 0.7168 |
| Listeria_monocytogenes_serotype_4b_str_02-1792_1196173   | Listeria_grayi_1641_v2 | 0.7065 |
| Listeria_monocytogenes_serotype_4b_str_02-1289_1196172   | Listeria_grayi_1641_v2 | 0.7065 |
| Listeria_monocytogenes_serotype_4b_str_02-1103_1196171   | Listeria_grayi_1641_v2 | 0.7065 |
| Listeria_monocytogenes_serotype_3c_str_10-5027_1196195   | Listeria_grayi_1641_v2 | 0.7047 |
| Listeria_monocytogenes_serotype_1_2c_str_10-5026_1196194 | Listeria_grayi_1641_v2 | 0.7055 |
| Listeria_monocytogenes_serotype_1_2c_str_10-5025_1196193 | Listeria_grayi_1641_v2 | 0.7055 |
| Listeria_monocytogenes_serotype_1_2b_str_10-0811_1196164 | Listeria_grayi_1641_v2 | 0.7019 |
| Listeria_monocytogenes_serotype_1_2b_str_10-0810_1196163 | Listeria_grayi_1641_v2 | 0.7019 |
| Listeria_monocytogenes_serotype_1_2a_str_99-6370_1196179 | Listeria_grayi_1641_v2 | 0.6981 |
| Listeria_monocytogenes_serotype_1_2a_str_98-2035_1196178 | Listeria_grayi_1641_v2 | 0.6981 |
| Listeria_monocytogenes_serotype_1_2a_str_95-0093_1196177 | Listeria_grayi_1641_v2 | 0.7019 |
| Listeria_monocytogenes_serotype_1_2a_str_88-0478_1196176 | Listeria_grayi_1641_v2 | 0.7009 |
| Listeria_monocytogenes_serotype_1_2a_str_10-5024_1196192 | Listeria_grayi_1641_v2 | 0.7025 |
| Listeria_monocytogenes_serotype_1_2a_str_10-4758_1196168 | Listeria_grayi_1641_v2 | 0.7155 |
| Listeria_monocytogenes_serotype_1_2a_str_10-4754_1196167 | Listeria_grayi_1641_v2 | 0.7155 |
| Listeria_monocytogenes_serotype_1_2a_str_10-1321_1196191 | Listeria_grayi_1641_v2 | 0.7025 |
| Listeria_monocytogenes_serotype_1_2a_str_10-1047_1196190 | Listeria_grayi_1641_v2 | 0.7028 |
| Listeria_monocytogenes_serotype_1_2a_str_10-1046_1196189 | Listeria_grayi_1641_v2 | 0.7028 |
| Listeria_monocytogenes_serotype_1_2a_str_10-0934_1196170 | Listeria_grayi_1641_v2 | 0.7247 |
| Listeria_monocytogenes_serotype_1_2a_str_10-0933_1196169 | Listeria_grayi_1641_v2 | 0.7247 |
| Listeria_monocytogenes_serotype_1_2a_str_10-0815_1196188 | Listeria_grayi_1641_v2 | 0.6992 |
| Listeria_monocytogenes_serotype_1_2a_str_10-0814_1196187 | Listeria_grayi_1641_v2 | 0.7027 |
| Listeria_monocytogenes_serotype_1_2a_str_10-0813_1196166 | Listeria_grayi_1641_v2 | 0.7099 |
| Listeria_monocytogenes_serotype_1_2a_str_10-0812_1196165 | Listeria_grayi_1641_v2 | 0.7099 |
| Listeria_monocytogenes_serotype_1_2a_str_08-7669_1196186 | Listeria_grayi_1641_v2 | 0.7092 |
| Listeria_monocytogenes_serotype_1_2a_str_08-7374_1196185 | Listeria_grayi_1641_v2 | 0.7025 |
| Listeria_monocytogenes_serotype_1_2a_str_08-6997_1196184 | Listeria_grayi_1641_v2 | 0.6992 |
| Listeria_monocytogenes_serotype_1_2a_str_08-6569_1196183 | Listeria_grayi_1641_v2 | 0.6992 |
| Listeria_monocytogenes_serotype_1_2a_str_08-6056_1196182 | Listeria_grayi_1641_v2 | 0.6992 |
| Listeria_monocytogenes_serotype_1_2a_str_04-5457_1196181 | Listeria_grayi_1641_v2 | 0.7025 |
| Listeria_monocytogenes_serotype_1_2a_str_02-5993_1196180 | Listeria_grayi_1641_v2 | 0.7023 |
| Listeria_monocytogenes_R479a_1437838                     | Listeria_grayi_1641_v2 | 0.7021 |
| Listeria_monocytogenes_N53-1_1234142                     | Listeria_grayi_1641_v2 | 0.6841 |
| Listeria_monocytogenes_M7_1030009                        | Listeria_grayi_1641_v2 | 0.6939 |
| Listeria_monocytogenes_LO28_393132                       | Listeria_grayi_1641_v2 | 0.7045 |
| Listeria_monocytogenes_L99_563174                        | Listeria_grayi_1641_v2 | 0.6944 |
| Listeria_monocytogenes_L312_882094                       | Listeria_grayi_1641_v2 | 0.7216 |
| Listeria_monocytogenes_J1816_930781                      | Listeria_grayi_1641_v2 | 0.7016 |
| Listeria_monocytogenes_J1-220_930782                     | Listeria_grayi_1641_v2 | 0.702  |
| Listeria_monocytogenes_J0161_393130                      | Listeria_grayi_1641_v2 | 0.7056 |
| Listeria_monocytogenes_HCC23_552536                      | Listeria_grayi_1641_v2 | 0.6941 |
| Listeria_monocytogenes_FSL_R2-561_393126                 | Listeria_grayi_1641_v2 | 0.704  |
| Listeria_monocytogenes_FSL_J1-208_393119                 | Listeria_grayi_1641_v2 | 0.707  |
| Listeria_monocytogenes_FSL_J1-175_393118                 | Listeria_grayi_1641_v2 | 0.7104 |
| Listeria_monocytogenes_Finland_1998_393127               | Listeria_grayi_1641_v2 | 0.7211 |
| Listeria_monocytogenes_EGD-e_169963_v1                   | Listeria_grayi_1641_v2 | 0.7139 |
| Listeria_monocytogenes_EGD-e_169963                      | Listeria_grayi_1641_v2 | 0.7143 |
| Listeria_monocytogenes_EGD_1334565                       | Listeria_grayi_1641_v2 | 0.7161 |
| Listeria_monocytogenes_CFSAN002349_1299895               | Listeria_grayi_1641_v2 | 0.7179 |
| Listeria_monocytogenes_ATCC_19117_882095_v1              | Listeria_grayi_1641_v2 | 0.7164 |
| Listeria_monocytogenes_ATCC_19117_882095                 | Listeria_grayi_1641_v2 | 0.7163 |
| Listeria_monocytogenes_6179_1288295                      | Listeria_grayi_1641_v2 | 0.6965 |
| Listeria_monocytogenes_1639_v9                           | Listeria_grayi_1641_v2 | 0.6898 |
| Listeria_monocytogenes_1639_v99                          | Listeria_grayi_1641_v2 | 0.7036 |
| Listeria_monocytogenes_1639_v98                          | Listeria_grayi_1641_v2 | 0.7064 |
| Listeria_monocytogenes_1639_v97                          | Listeria_grayi_1641_v2 | 0.7078 |
| Listeria_monocytogenes_1639_v96                          | Listeria_grayi_1641_v2 | 0.7027 |
| Listeria_monocytogenes_1639_v95                          | Listeria_grayi_1641_v2 | 0.7028 |
| Listeria_monocytogenes_1639_v94                          | Listeria_grayi_1641_v2 | 0.7031 |
| Listeria_monocytogenes_1639_v93                          | Listeria_grayi_1641_v2 | 0.7051 |
| Listeria_monocytogenes_1639_v92                          | Listeria_grayi_1641_v2 | 0.7033 |
| Listeria_monocytogenes_1639_v91                          | Listeria_grayi_1641_v2 | 0.7024 |
| Listeria_monocytogenes_1639_v90                          | Listeria_grayi_1641_v2 | 0.7064 |
| Listeria_monocytogenes_1639_v8                           | Listeria_grayi_1641_v2 | 0.6933 |
| Listeria_monocytogenes_1639_v89                          | Listeria_grayi_1641_v2 | 0.7117 |
| Listeria_monocytogenes_1639_v88                          | Listeria_grayi_1641_v2 | 0.7095 |
| Listeria_monocytogenes_1639_v87                          | Listeria_grayi_1641_v2 | 0.7056 |
| Listeria_monocytogenes_1639_v86                          | Listeria_grayi_1641_v2 | 0.7057 |
| Listeria_monocytogenes_1639_v85                          | Listeria_grayi_1641_v2 | 0.7052 |
| Listeria_monocytogenes_1639_v84                          | Listeria_grayi_1641_v2 | 0.7099 |
| Listeria_monocytogenes_1639_v83                          | Listeria_grayi_1641_v2 | 0.7085 |
| Listeria_monocytogenes_1639_v82                          | Listeria_grayi_1641_v2 | 0.7079 |
| Listeria_monocytogenes_1639_v81                          | Listeria_grayi_1641_v2 | 0.7063 |
| Listeria_monocytogenes_1639_v80                          | Listeria_grayi_1641_v2 | 0.7079 |
| Listeria_monocytogenes_1639_v7                           | Listeria_grayi_1641_v2 | 0.6933 |
| Listeria_monocytogenes_1639_v79                          | Listeria_grayi_1641_v2 | 0.705  |
| Listeria_monocytogenes_1639_v78                          | Listeria_grayi_1641_v2 | 0.7065 |
| Listeria_monocytogenes_1639_v77                          | Listeria_grayi_1641_v2 | 0.7112 |
| Listeria_monocytogenes_1639_v76                          | Listeria_grayi_1641_v2 | 0.7026 |
| Listeria_monocytogenes_1639_v75                          | Listeria_grayi_1641_v2 | 0.6944 |
| Listeria_monocytogenes_1639_v74                          | Listeria_grayi_1641_v2 | 0.7088 |
| Listeria_monocytogenes_1639_v73                          | Listeria_grayi_1641_v2 | 0.7011 |
| Listeria_monocytogenes_1639_v72                          | Listeria_grayi_1641_v2 | 0.7074 |
| Listeria_monocytogenes_1639_v71                          | Listeria_grayi_1641_v2 | 0.6991 |
| Listeria_monocytogenes_1639_v70                          | Listeria_grayi_1641_v2 | 0.7033 |

[illegible]

|                                                |                        |        |
|------------------------------------------------|------------------------|--------|
| Listeria_monocytogenes_1639_v167               | Listeria_grayi_1641_v2 | 0.7206 |
| Listeria_monocytogenes_1639_v166               | Listeria_grayi_1641_v2 | 0.7241 |
| Listeria_monocytogenes_1639_v165               | Listeria_grayi_1641_v2 | 0.718  |
| Listeria_monocytogenes_1639_v164               | Listeria_grayi_1641_v2 | 0.7165 |
| Listeria_monocytogenes_1639_v163               | Listeria_grayi_1641_v2 | 0.7172 |
| Listeria_monocytogenes_1639_v162               | Listeria_grayi_1641_v2 | 0.7165 |
| Listeria_monocytogenes_1639_v161               | Listeria_grayi_1641_v2 | 0.7158 |
| Listeria_monocytogenes_1639_v160               | Listeria_grayi_1641_v2 | 0.7159 |
| Listeria_monocytogenes_1639_v15                | Listeria_grayi_1641_v2 | 0.6956 |
| Listeria_monocytogenes_1639_v159               | Listeria_grayi_1641_v2 | 0.7162 |
| Listeria_monocytogenes_1639_v158               | Listeria_grayi_1641_v2 | 0.7156 |
| Listeria_monocytogenes_1639_v157               | Listeria_grayi_1641_v2 | 0.7156 |
| Listeria_monocytogenes_1639_v156               | Listeria_grayi_1641_v2 | 0.7097 |
| Listeria_monocytogenes_1639_v155               | Listeria_grayi_1641_v2 | 0.7158 |
| Listeria_monocytogenes_1639_v154               | Listeria_grayi_1641_v2 | 0.7164 |
| Listeria_monocytogenes_1639_v153               | Listeria_grayi_1641_v2 | 0.7165 |
| Listeria_monocytogenes_1639_v152               | Listeria_grayi_1641_v2 | 0.7165 |
| Listeria_monocytogenes_1639_v151               | Listeria_grayi_1641_v2 | 0.7165 |
| Listeria_monocytogenes_1639_v150               | Listeria_grayi_1641_v2 | 0.717  |
| Listeria_monocytogenes_1639_v14                | Listeria_grayi_1641_v2 | 0.6966 |
| Listeria_monocytogenes_1639_v149               | Listeria_grayi_1641_v2 | 0.7161 |
| Listeria_monocytogenes_1639_v148               | Listeria_grayi_1641_v2 | 0.7152 |
| Listeria_monocytogenes_1639_v147               | Listeria_grayi_1641_v2 | 0.7079 |
| Listeria_monocytogenes_1639_v146               | Listeria_grayi_1641_v2 | 0.7207 |
| Listeria_monocytogenes_1639_v145               | Listeria_grayi_1641_v2 | 0.7246 |
| Listeria_monocytogenes_1639_v144               | Listeria_grayi_1641_v2 | 0.7214 |
| Listeria_monocytogenes_1639_v143               | Listeria_grayi_1641_v2 | 0.719  |
| Listeria_monocytogenes_1639_v142               | Listeria_grayi_1641_v2 | 0.7214 |
| Listeria_monocytogenes_1639_v141               | Listeria_grayi_1641_v2 | 0.7185 |
| Listeria_monocytogenes_1639_v140               | Listeria_grayi_1641_v2 | 0.7216 |
| Listeria_monocytogenes_1639_v13                | Listeria_grayi_1641_v2 | 0.6958 |
| Listeria_monocytogenes_1639_v139               | Listeria_grayi_1641_v2 | 0.715  |
| Listeria_monocytogenes_1639_v138               | Listeria_grayi_1641_v2 | 0.7215 |
| Listeria_monocytogenes_1639_v137               | Listeria_grayi_1641_v2 | 0.7211 |
| Listeria_monocytogenes_1639_v136               | Listeria_grayi_1641_v2 | 0.7149 |
| Listeria_monocytogenes_1639_v135               | Listeria_grayi_1641_v2 | 0.7078 |
| Listeria_monocytogenes_1639_v134               | Listeria_grayi_1641_v2 | 0.7132 |
| Listeria_monocytogenes_1639_v133               | Listeria_grayi_1641_v2 | 0.7138 |
| Listeria_monocytogenes_1639_v132               | Listeria_grayi_1641_v2 | 0.7024 |
| Listeria_monocytogenes_1639_v131               | Listeria_grayi_1641_v2 | 0.7072 |
| Listeria_monocytogenes_1639_v130               | Listeria_grayi_1641_v2 | 0.708  |
| Listeria_monocytogenes_1639_v12                | Listeria_grayi_1641_v2 | 0.6904 |
| Listeria_monocytogenes_1639_v129               | Listeria_grayi_1641_v2 | 0.7214 |
| Listeria_monocytogenes_1639_v128               | Listeria_grayi_1641_v2 | 0.7179 |
| Listeria_monocytogenes_1639_v127               | Listeria_grayi_1641_v2 | 0.7124 |
| Listeria_monocytogenes_1639_v126               | Listeria_grayi_1641_v2 | 0.7171 |
| Listeria_monocytogenes_1639_v125               | Listeria_grayi_1641_v2 | 0.7181 |
| Listeria_monocytogenes_1639_v124               | Listeria_grayi_1641_v2 | 0.7101 |
| Listeria_monocytogenes_1639_v123               | Listeria_grayi_1641_v2 | 0.7179 |
| Listeria_monocytogenes_1639_v122               | Listeria_grayi_1641_v2 | 0.7178 |
| Listeria_monocytogenes_1639_v121               | Listeria_grayi_1641_v2 | 0.7178 |
| Listeria_monocytogenes_1639_v120               | Listeria_grayi_1641_v2 | 0.7175 |
| Listeria_monocytogenes_1639_v11                | Listeria_grayi_1641_v2 | 0.6928 |
| Listeria_monocytogenes_1639_v119               | Listeria_grayi_1641_v2 | 0.7178 |
| Listeria_monocytogenes_1639_v118               | Listeria_grayi_1641_v2 | 0.7178 |
| Listeria_monocytogenes_1639_v117               | Listeria_grayi_1641_v2 | 0.7144 |
| Listeria_monocytogenes_1639_v116               | Listeria_grayi_1641_v2 | 0.7131 |
| Listeria_monocytogenes_1639_v115               | Listeria_grayi_1641_v2 | 0.7133 |
| Listeria_monocytogenes_1639_v114               | Listeria_grayi_1641_v2 | 0.7103 |
| Listeria_monocytogenes_1639_v113               | Listeria_grayi_1641_v2 | 0.7146 |
| Listeria_monocytogenes_1639_v112               | Listeria_grayi_1641_v2 | 0.7075 |
| Listeria_monocytogenes_1639_v111               | Listeria_grayi_1641_v2 | 0.7109 |
| Listeria_monocytogenes_1639_v110               | Listeria_grayi_1641_v2 | 0.7105 |
| Listeria_monocytogenes_1639_v10                | Listeria_grayi_1641_v2 | 0.6932 |
| Listeria_monocytogenes_1639_v109               | Listeria_grayi_1641_v2 | 0.7093 |
| Listeria_monocytogenes_1639_v108               | Listeria_grayi_1641_v2 | 0.7075 |
| Listeria_monocytogenes_1639_v107               | Listeria_grayi_1641_v2 | 0.7151 |
| Listeria_monocytogenes_1639_v106               | Listeria_grayi_1641_v2 | 0.7155 |
| Listeria_monocytogenes_1639_v105               | Listeria_grayi_1641_v2 | 0.7155 |
| Listeria_monocytogenes_1639_v104               | Listeria_grayi_1641_v2 | 0.7158 |
| Listeria_monocytogenes_1639_v103               | Listeria_grayi_1641_v2 | 0.7158 |
| Listeria_monocytogenes_1639_v102               | Listeria_grayi_1641_v2 | 0.7103 |
| Listeria_monocytogenes_1639_v101               | Listeria_grayi_1641_v2 | 0.7021 |
| Listeria_monocytogenes_1639_v100               | Listeria_grayi_1641_v2 | 0.7013 |
| Listeria_monocytogenes_1639                    | Listeria_grayi_1641_v2 | 0.7239 |
| Listeria_monocytogenes_10403S_393133           | Listeria_grayi_1641_v2 | 0.7183 |
| Listeria_monocytogenes_08-5923_637381          | Listeria_grayi_1641_v2 | 0.7025 |
| Listeria_monocytogenes_08-5578_653938          | Listeria_grayi_1641_v2 | 0.6925 |
| Listeria_monocytogenes_07PF0776_1126011        | Listeria_grayi_1641_v2 | 0.7154 |
| Listeria_marthii_FSL_S4-120_702457             | Listeria_grayi_1641_v2 | 0.6759 |
| Listeria_marthii_529731_v1                     | Listeria_grayi_1641_v2 | 0.7003 |
| Listeria_marthii_529731                        | Listeria_grayi_1641_v2 | 0.7033 |
| Listeria_ivanovii_WSLC3009_1457190             | Listeria_grayi_1641_v2 | 0.7099 |
| Listeria_ivanovii_subsp_londoniensis_202752_v2 | Listeria_grayi_1641_v2 | 0.7051 |
| Listeria_ivanovii_subsp_londoniensis_202752_v1 | Listeria_grayi_1641_v2 | 0.695  |
| Listeria_ivanovii_subsp_londoniensis_202752    | Listeria_grayi_1641_v2 | 0.7018 |
| Listeria_ivanovii_subsp_ivanovii_PAM_55_881621 | Listeria_grayi_1641_v2 | 0.7088 |
| Listeria_ivanovii_subsp_ivanovii_202751_v2     | Listeria_grayi_1641_v2 | 0.7104 |
| Listeria_ivanovii_subsp_ivanovii_202751_v1     | Listeria_grayi_1641_v2 | 0.7104 |
| Listeria_ivanovii_subsp_ivanovii_202751        | Listeria_grayi_1641_v2 | 0.7104 |
| Listeria_ivanovii_FSL_F6-596_702454            | Listeria_grayi_1641_v2 | 0.6524 |



|                                                          |                                 |        |
|----------------------------------------------------------|---------------------------------|--------|
| Listeria_ivanovii_1638                                   | Listeria_grayi_1641_v2          | 0.7106 |
| Listeria_innocua_FSL_S4-378_702456                       | Listeria_grayi_1641_v2          | 0.6523 |
| Listeria_innocua_FSL_J1-023_702455                       | Listeria_grayi_1641_v2          | 0.6809 |
| Listeria_innocua_Clip11262_272626                        | Listeria_grayi_1641_v2          | 0.6889 |
| Listeria_innocua_1642_v4                                 | Listeria_grayi_1641_v2          | 0.6906 |
| Listeria_innocua_1642_v3                                 | Listeria_grayi_1641_v2          | 0.7058 |
| Listeria_innocua_1642_v2                                 | Listeria_grayi_1641_v2          | 0.7064 |
| Listeria_innocua_1642_v1                                 | Listeria_grayi_1641_v2          | 0.7097 |
| Listeria_innocua_1642                                    | Listeria_grayi_1641_v2          | 0.7057 |
| Listeria_grayi_DSM_20601_525367                          | Listeria_grayi_1641_v2          | 0.9062 |
| Listeria_grayi_1641_v2                                   | Listeria_grayi_1641_v2          | 0.0667 |
| Listeria_welshimeri_1643                                 | Listeria_grayi_DSM_20601_525367 | 0.7021 |
| Listeria_welshimeri_serovar_6b_str_SLCC5334_386043       | Listeria_grayi_DSM_20601_525367 | 0.7019 |
| Listeria_seeligeri_serovar_1_2b_str_SLCC3954_683837      | Listeria_grayi_DSM_20601_525367 | 0.7092 |
| Listeria_seeligeri_FSL_S4-171_702452                     | Listeria_grayi_DSM_20601_525367 | 0.6579 |
| Listeria_seeligeri_FSL_N1-067_702453                     | Listeria_grayi_DSM_20601_525367 | 0.6717 |
| Listeria_seeligeri_1640_v1                               | Listeria_grayi_DSM_20601_525367 | 0.7081 |
| Listeria_seeligeri_1640                                  | Listeria_grayi_DSM_20601_525367 | 0.6948 |
| Listeria_monocytogenes_WSLC1042_1457188                  | Listeria_grayi_DSM_20601_525367 | 0.7077 |
| Listeria_monocytogenes_WSLC1001_1457187                  | Listeria_grayi_DSM_20601_525367 | 0.7108 |
| Listeria_monocytogenes_SLCC7179_879090                   | Listeria_grayi_DSM_20601_525367 | 0.7125 |
| Listeria_monocytogenes_SLCC5850_882096                   | Listeria_grayi_DSM_20601_525367 | 0.7138 |
| Listeria_monocytogenes_SLCC2755_932919                   | Listeria_grayi_DSM_20601_525367 | 0.7053 |
| Listeria_monocytogenes_SLCC2540_879089                   | Listeria_grayi_DSM_20601_525367 | 0.7087 |
| Listeria_monocytogenes_SLCC2479_882020                   | Listeria_grayi_DSM_20601_525367 | 0.7032 |
| Listeria_monocytogenes_SLCC2378_879088                   | Listeria_grayi_DSM_20601_525367 | 0.7088 |
| Listeria_monocytogenes_SLCC2376_882097                   | Listeria_grayi_DSM_20601_525367 | 0.7212 |
| Listeria_monocytogenes_SLCC2372_932920                   | Listeria_grayi_DSM_20601_525367 | 0.7017 |
| Listeria_monocytogenes_serotype_4b_str_LL195_1230340     | Listeria_grayi_DSM_20601_525367 | 0.7121 |
| Listeria_monocytogenes_serotype_4b_str_LIS0087_1134669   | Listeria_grayi_DSM_20601_525367 | 0.6927 |
| Listeria_monocytogenes_serotype_4b_str_F2365_265669      | Listeria_grayi_DSM_20601_525367 | 0.7121 |
| Listeria_monocytogenes_serotype_4b_str_CLIP_80459_568819 | Listeria_grayi_DSM_20601_525367 | 0.7185 |
| Listeria_monocytogenes_serotype_4b_str_81-0861_1196161   | Listeria_grayi_DSM_20601_525367 | 0.7005 |
| Listeria_monocytogenes_serotype_4b_str_81-0592_1196160   | Listeria_grayi_DSM_20601_525367 | 0.7014 |
| Listeria_monocytogenes_serotype_4b_str_81-0558_1196159   | Listeria_grayi_DSM_20601_525367 | 0.702  |
| Listeria_monocytogenes_serotype_4b_str_10-0809_1196162   | Listeria_grayi_DSM_20601_525367 | 0.7014 |
| Listeria_monocytogenes_serotype_4b_str_02-6680_1196175   | Listeria_grayi_DSM_20601_525367 | 0.7128 |
| Listeria_monocytogenes_serotype_4b_str_02-6679_1196174   | Listeria_grayi_DSM_20601_525367 | 0.7128 |
| Listeria_monocytogenes_serotype_4b_str_02-1792_1196173   | Listeria_grayi_DSM_20601_525367 | 0.7025 |
| Listeria_monocytogenes_serotype_4b_str_02-1289_1196172   | Listeria_grayi_DSM_20601_525367 | 0.7025 |
| Listeria_monocytogenes_serotype_4b_str_02-1103_1196171   | Listeria_grayi_DSM_20601_525367 | 0.7025 |
| Listeria_monocytogenes_serotype_3c_str_10-5027_1196195   | Listeria_grayi_DSM_20601_525367 | 0.7027 |
| Listeria_monocytogenes_serotype_1_2c_str_10-5026_1196194 | Listeria_grayi_DSM_20601_525367 | 0.7035 |
| Listeria_monocytogenes_serotype_1_2c_str_10-5025_1196193 | Listeria_grayi_DSM_20601_525367 | 0.7035 |
| Listeria_monocytogenes_serotype_1_2b_str_10-0811_1196164 | Listeria_grayi_DSM_20601_525367 | 0.7002 |
| Listeria_monocytogenes_serotype_1_2b_str_10-0810_1196163 | Listeria_grayi_DSM_20601_525367 | 0.7002 |
| Listeria_monocytogenes_serotype_1_2a_str_99-6370_1196179 | Listeria_grayi_DSM_20601_525367 | 0.6952 |
| Listeria_monocytogenes_serotype_1_2a_str_98-2035_1196178 | Listeria_grayi_DSM_20601_525367 | 0.6952 |
| Listeria_monocytogenes_serotype_1_2a_str_95-0093_1196177 | Listeria_grayi_DSM_20601_525367 | 0.6994 |
| Listeria_monocytogenes_serotype_1_2a_str_88-0478_1196176 | Listeria_grayi_DSM_20601_525367 | 0.6984 |
| Listeria_monocytogenes_serotype_1_2a_str_10-5024_1196192 | Listeria_grayi_DSM_20601_525367 | 0.6997 |
| Listeria_monocytogenes_serotype_1_2a_str_10-4758_1196168 | Listeria_grayi_DSM_20601_525367 | 0.7131 |
| Listeria_monocytogenes_serotype_1_2a_str_10-4754_1196167 | Listeria_grayi_DSM_20601_525367 | 0.7131 |
| Listeria_monocytogenes_serotype_1_2a_str_10-1321_1196191 | Listeria_grayi_DSM_20601_525367 | 0.6997 |
| Listeria_monocytogenes_serotype_1_2a_str_10-1047_1196190 | Listeria_grayi_DSM_20601_525367 | 0.7    |
| Listeria_monocytogenes_serotype_1_2a_str_10-1046_1196189 | Listeria_grayi_DSM_20601_525367 | 0.7    |
| Listeria_monocytogenes_serotype_1_2a_str_10-0934_1196170 | Listeria_grayi_DSM_20601_525367 | 0.7208 |
| Listeria_monocytogenes_serotype_1_2a_str_10-0933_1196169 | Listeria_grayi_DSM_20601_525367 | 0.7208 |
| Listeria_monocytogenes_serotype_1_2a_str_10-0815_1196188 | Listeria_grayi_DSM_20601_525367 | 0.6963 |
| Listeria_monocytogenes_serotype_1_2a_str_10-0814_1196187 | Listeria_grayi_DSM_20601_525367 | 0.6998 |
| Listeria_monocytogenes_serotype_1_2a_str_10-0813_1196166 | Listeria_grayi_DSM_20601_525367 | 0.7075 |
| Listeria_monocytogenes_serotype_1_2a_str_10-0812_1196165 | Listeria_grayi_DSM_20601_525367 | 0.7075 |
| Listeria_monocytogenes_serotype_1_2a_str_08-7669_1196186 | Listeria_grayi_DSM_20601_525367 | 0.7067 |
| Listeria_monocytogenes_serotype_1_2a_str_08-7374_1196185 | Listeria_grayi_DSM_20601_525367 | 0.6997 |
| Listeria_monocytogenes_serotype_1_2a_str_08-6997_1196184 | Listeria_grayi_DSM_20601_525367 | 0.6963 |
| Listeria_monocytogenes_serotype_1_2a_str_08-6569_1196183 | Listeria_grayi_DSM_20601_525367 | 0.6963 |
| Listeria_monocytogenes_serotype_1_2a_str_08-6056_1196182 | Listeria_grayi_DSM_20601_525367 | 0.6963 |
| Listeria_monocytogenes_serotype_1_2a_str_04-5457_1196181 | Listeria_grayi_DSM_20601_525367 | 0.6997 |
| Listeria_monocytogenes_serotype_1_2a_str_02-5993_1196180 | Listeria_grayi_DSM_20601_525367 | 0.6994 |
| Listeria_monocytogenes_R479a_1437838                     | Listeria_grayi_DSM_20601_525367 | 0.7071 |
| Listeria_monocytogenes_N53-1_1234142                     | Listeria_grayi_DSM_20601_525367 | 0.6811 |
| Listeria_monocytogenes_M7_1030009                        | Listeria_grayi_DSM_20601_525367 | 0.6933 |
| Listeria_monocytogenes_LO28_393132                       | Listeria_grayi_DSM_20601_525367 | 0.7021 |
| Listeria_monocytogenes_L99_563174                        | Listeria_grayi_DSM_20601_525367 | 0.6938 |
| Listeria_monocytogenes_L312_882094                       | Listeria_grayi_DSM_20601_525367 | 0.7185 |
| Listeria_monocytogenes_J1816_930781                      | Listeria_grayi_DSM_20601_525367 | 0.6987 |
| Listeria_monocytogenes_J1-220_930782                     | Listeria_grayi_DSM_20601_525367 | 0.698  |
| Listeria_monocytogenes_J0161_393130                      | Listeria_grayi_DSM_20601_525367 | 0.7012 |
| Listeria_monocytogenes_HCC23_552536                      | Listeria_grayi_DSM_20601_525367 | 0.6935 |
| Listeria_monocytogenes_FSL_R2-561_393126                 | Listeria_grayi_DSM_20601_525367 | 0.702  |
| Listeria_monocytogenes_FSL_J1-208_393119                 | Listeria_grayi_DSM_20601_525367 | 0.7082 |
| Listeria_monocytogenes_FSL_J1-175_393118                 | Listeria_grayi_DSM_20601_525367 | 0.7076 |
| Listeria_monocytogenes_Finland_1998_393127               | Listeria_grayi_DSM_20601_525367 | 0.7167 |
| Listeria_monocytogenes_EGD-e_169963_v1                   | Listeria_grayi_DSM_20601_525367 | 0.7096 |
| Listeria_monocytogenes_EGD-e_169963                      | Listeria_grayi_DSM_20601_525367 | 0.71   |
| Listeria_monocytogenes_EGD_1334565                       | Listeria_grayi_DSM_20601_525367 | 0.7145 |
| Listeria_monocytogenes_CFSAN002349_1299895               | Listeria_grayi_DSM_20601_525367 | 0.7147 |
| Listeria_monocytogenes_ATCC_19117_882095_v1              | Listeria_grayi_DSM_20601_525367 | 0.7124 |
| Listeria_monocytogenes_ATCC_19117_882095                 | Listeria_grayi_DSM_20601_525367 | 0.7123 |
| Listeria_monocytogenes_6179_1288295                      | Listeria_grayi_DSM_20601_525367 | 0.6994 |
| Listeria_monocytogenes_1639_v9                           | Listeria_grayi_DSM_20601_525367 | 0.6861 |



[illegible]

|                                                          |                                 |        |
|----------------------------------------------------------|---------------------------------|--------|
| Listeria_monocytogenes_1639_v113                         | Listeria_grayi_DSM_20601_525367 | 0.7134 |
| Listeria_monocytogenes_1639_v112                         | Listeria_grayi_DSM_20601_525367 | 0.7055 |
| Listeria_monocytogenes_1639_v111                         | Listeria_grayi_DSM_20601_525367 | 0.7085 |
| Listeria_monocytogenes_1639_v110                         | Listeria_grayi_DSM_20601_525367 | 0.7089 |
| Listeria_monocytogenes_1639_v10                          | Listeria_grayi_DSM_20601_525367 | 0.6895 |
| Listeria_monocytogenes_1639_v109                         | Listeria_grayi_DSM_20601_525367 | 0.7077 |
| Listeria_monocytogenes_1639_v108                         | Listeria_grayi_DSM_20601_525367 | 0.7067 |
| Listeria_monocytogenes_1639_v107                         | Listeria_grayi_DSM_20601_525367 | 0.7112 |
| Listeria_monocytogenes_1639_v106                         | Listeria_grayi_DSM_20601_525367 | 0.7116 |
| Listeria_monocytogenes_1639_v105                         | Listeria_grayi_DSM_20601_525367 | 0.7116 |
| Listeria_monocytogenes_1639_v104                         | Listeria_grayi_DSM_20601_525367 | 0.7118 |
| Listeria_monocytogenes_1639_v103                         | Listeria_grayi_DSM_20601_525367 | 0.7118 |
| Listeria_monocytogenes_1639_v102                         | Listeria_grayi_DSM_20601_525367 | 0.7059 |
| Listeria_monocytogenes_1639_v101                         | Listeria_grayi_DSM_20601_525367 | 0.7071 |
| Listeria_monocytogenes_1639_v100                         | Listeria_grayi_DSM_20601_525367 | 0.7066 |
| Listeria_monocytogenes_1639                              | Listeria_grayi_DSM_20601_525367 | 0.7216 |
| Listeria_monocytogenes_10403S_393133                     | Listeria_grayi_DSM_20601_525367 | 0.7159 |
| Listeria_monocytogenes_08-5923_637381                    | Listeria_grayi_DSM_20601_525367 | 0.6997 |
| Listeria_monocytogenes_08-5578_653938                    | Listeria_grayi_DSM_20601_525367 | 0.698  |
| Listeria_monocytogenes_07PF0776_1126011                  | Listeria_grayi_DSM_20601_525367 | 0.7114 |
| Listeria_marthii_FSL_S4-120_702457                       | Listeria_grayi_DSM_20601_525367 | 0.675  |
| Listeria_marthii_529731_v1                               | Listeria_grayi_DSM_20601_525367 | 0.6993 |
| Listeria_marthii_529731                                  | Listeria_grayi_DSM_20601_525367 | 0.7076 |
| Listeria_ivanovii_WSLC3009_1457190                       | Listeria_grayi_DSM_20601_525367 | 0.7074 |
| Listeria_ivanovii_subsp_londoniensis_202752_v2           | Listeria_grayi_DSM_20601_525367 | 0.7062 |
| Listeria_ivanovii_subsp_londoniensis_202752_v1           | Listeria_grayi_DSM_20601_525367 | 0.6972 |
| Listeria_ivanovii_subsp_londoniensis_202752              | Listeria_grayi_DSM_20601_525367 | 0.7017 |
| Listeria_ivanovii_subsp_ivanovii_PAM_55_881621           | Listeria_grayi_DSM_20601_525367 | 0.7067 |
| Listeria_ivanovii_subsp_ivanovii_202751_v2               | Listeria_grayi_DSM_20601_525367 | 0.708  |
| Listeria_ivanovii_subsp_ivanovii_202751_v1               | Listeria_grayi_DSM_20601_525367 | 0.708  |
| Listeria_ivanovii_subsp_ivanovii_202751                  | Listeria_grayi_DSM_20601_525367 | 0.708  |
| Listeria_ivanovii_FSL_F6-596_702454                      | Listeria_grayi_DSM_20601_525367 | 0.6529 |
| Listeria_ivanovii_1638                                   | Listeria_grayi_DSM_20601_525367 | 0.7077 |
| Listeria_innocua_FSL_S4-378_702456                       | Listeria_grayi_DSM_20601_525367 | 0.648  |
| Listeria_innocua_FSL_J1-023_702455                       | Listeria_grayi_DSM_20601_525367 | 0.6805 |
| Listeria_innocua_Clip11262_272626                        | Listeria_grayi_DSM_20601_525367 | 0.6909 |
| Listeria_innocua_1642_v4                                 | Listeria_grayi_DSM_20601_525367 | 0.6922 |
| Listeria_innocua_1642_v3                                 | Listeria_grayi_DSM_20601_525367 | 0.7061 |
| Listeria_innocua_1642_v2                                 | Listeria_grayi_DSM_20601_525367 | 0.7071 |
| Listeria_innocua_1642_v1                                 | Listeria_grayi_DSM_20601_525367 | 0.71   |
| Listeria_innocua_1642                                    | Listeria_grayi_DSM_20601_525367 | 0.706  |
| Listeria_grayi_DSM_20601_525367                          | Listeria_grayi_DSM_20601_525367 | 0.0533 |
| Listeria_welshimeri_1643                                 | Listeria_innocua_1642           | 0.8745 |
| Listeria_welshimeri_serovar_6b_str_SLCC5334_386043       | Listeria_innocua_1642           | 0.8742 |
| Listeria_seeligeri_serovar_1_2b_str_SLCC3954_683837      | Listeria_innocua_1642           | 0.8685 |
| Listeria_seeligeri_FSL_S4-171_702452                     | Listeria_innocua_1642           | 0.8244 |
| Listeria_seeligeri_FSL_N1-067_702453                     | Listeria_innocua_1642           | 0.8205 |
| Listeria_seeligeri_1640_v1                               | Listeria_innocua_1642           | 0.8705 |
| Listeria_seeligeri_1640                                  | Listeria_innocua_1642           | 0.87   |
| Listeria_monocytogenes_WSLC1042_1457188                  | Listeria_innocua_1642           | 0.91   |
| Listeria_monocytogenes_WSLC1001_1457187                  | Listeria_innocua_1642           | 0.9051 |
| Listeria_monocytogenes_SLCC7179_879090                   | Listeria_innocua_1642           | 0.9134 |
| Listeria_monocytogenes_SLCC5850_882096                   | Listeria_innocua_1642           | 0.9092 |
| Listeria_monocytogenes_SLCC2755_932919                   | Listeria_innocua_1642           | 0.895  |
| Listeria_monocytogenes_SLCC2540_879089                   | Listeria_innocua_1642           | 0.9066 |
| Listeria_monocytogenes_SLCC2479_882020                   | Listeria_innocua_1642           | 0.9102 |
| Listeria_monocytogenes_SLCC2378_879088                   | Listeria_innocua_1642           | 0.9107 |
| Listeria_monocytogenes_SLCC2376_882097                   | Listeria_innocua_1642           | 0.9241 |
| Listeria_monocytogenes_SLCC2372_932920                   | Listeria_innocua_1642           | 0.9028 |
| Listeria_monocytogenes_serotype_4b_str_LL195_1230340     | Listeria_innocua_1642           | 0.9162 |
| Listeria_monocytogenes_serotype_4b_str_LIS0087_1134669   | Listeria_innocua_1642           | 0.8908 |
| Listeria_monocytogenes_serotype_4b_str_F2365_265669      | Listeria_innocua_1642           | 0.9162 |
| Listeria_monocytogenes_serotype_4b_str_CLIP_80459_568819 | Listeria_innocua_1642           | 0.9172 |
| Listeria_monocytogenes_serotype_4b_str_81-0861_1196161   | Listeria_innocua_1642           | 0.9109 |
| Listeria_monocytogenes_serotype_4b_str_81-0592_1196160   | Listeria_innocua_1642           | 0.912  |
| Listeria_monocytogenes_serotype_4b_str_81-0558_1196159   | Listeria_innocua_1642           | 0.9123 |
| Listeria_monocytogenes_serotype_4b_str_10-0809_1196162   | Listeria_innocua_1642           | 0.9123 |
| Listeria_monocytogenes_serotype_4b_str_02-6680_1196175   | Listeria_innocua_1642           | 0.9159 |
| Listeria_monocytogenes_serotype_4b_str_02-6679_1196174   | Listeria_innocua_1642           | 0.9159 |
| Listeria_monocytogenes_serotype_4b_str_02-1792_1196173   | Listeria_innocua_1642           | 0.9127 |
| Listeria_monocytogenes_serotype_4b_str_02-1289_1196172   | Listeria_innocua_1642           | 0.9127 |
| Listeria_monocytogenes_serotype_4b_str_02-1103_1196171   | Listeria_innocua_1642           | 0.9127 |
| Listeria_monocytogenes_serotype_3c_str_10-5027_1196195   | Listeria_innocua_1642           | 0.9091 |
| Listeria_monocytogenes_serotype_1_2c_str_10-5026_1196194 | Listeria_innocua_1642           | 0.9095 |
| Listeria_monocytogenes_serotype_1_2c_str_10-5025_1196193 | Listeria_innocua_1642           | 0.9095 |
| Listeria_monocytogenes_serotype_1_2b_str_10-0811_1196164 | Listeria_innocua_1642           | 0.9065 |
| Listeria_monocytogenes_serotype_1_2b_str_10-0810_1196163 | Listeria_innocua_1642           | 0.9065 |
| Listeria_monocytogenes_serotype_1_2a_str_99-6370_1196179 | Listeria_innocua_1642           | 0.8963 |
| Listeria_monocytogenes_serotype_1_2a_str_98-2035_1196178 | Listeria_innocua_1642           | 0.8963 |
| Listeria_monocytogenes_serotype_1_2a_str_95-0093_1196177 | Listeria_innocua_1642           | 0.9001 |
| Listeria_monocytogenes_serotype_1_2a_str_88-0478_1196176 | Listeria_innocua_1642           | 0.8993 |
| Listeria_monocytogenes_serotype_1_2a_str_10-5024_1196192 | Listeria_innocua_1642           | 0.9001 |
| Listeria_monocytogenes_serotype_1_2a_str_10-4758_1196168 | Listeria_innocua_1642           | 0.9082 |
| Listeria_monocytogenes_serotype_1_2a_str_10-4754_1196167 | Listeria_innocua_1642           | 0.9086 |
| Listeria_monocytogenes_serotype_1_2a_str_10-1321_1196191 | Listeria_innocua_1642           | 0.9001 |
| Listeria_monocytogenes_serotype_1_2a_str_10-1047_1196190 | Listeria_innocua_1642           | 0.9007 |
| Listeria_monocytogenes_serotype_1_2a_str_10-1046_1196189 | Listeria_innocua_1642           | 0.9007 |
| Listeria_monocytogenes_serotype_1_2a_str_10-0934_1196170 | Listeria_innocua_1642           | 0.9185 |
| Listeria_monocytogenes_serotype_1_2a_str_10-0933_1196169 | Listeria_innocua_1642           | 0.9185 |
| Listeria_monocytogenes_serotype_1_2a_str_10-0815_1196188 | Listeria_innocua_1642           | 0.8965 |
| Listeria_monocytogenes_serotype_1_2a_str_10-0814_1196187 | Listeria_innocua_1642           | 0.9004 |

|                                                          |                       |        |
|----------------------------------------------------------|-----------------------|--------|
| Listeria_monocytogenes_serotype_1_2a_str_10-0813_1196166 | Listeria_innocua_1642 | 0.9095 |
| Listeria_monocytogenes_serotype_1_2a_str_10-0812_1196165 | Listeria_innocua_1642 | 0.9095 |
| Listeria_monocytogenes_serotype_1_2a_str_08-7669_1196186 | Listeria_innocua_1642 | 0.9088 |
| Listeria_monocytogenes_serotype_1_2a_str_08-7374_1196185 | Listeria_innocua_1642 | 0.9001 |
| Listeria_monocytogenes_serotype_1_2a_str_08-6997_1196184 | Listeria_innocua_1642 | 0.8965 |
| Listeria_monocytogenes_serotype_1_2a_str_08-6569_1196183 | Listeria_innocua_1642 | 0.8965 |
| Listeria_monocytogenes_serotype_1_2a_str_08-6056_1196182 | Listeria_innocua_1642 | 0.8965 |
| Listeria_monocytogenes_serotype_1_2a_str_04-5457_1196181 | Listeria_innocua_1642 | 0.9001 |
| Listeria_monocytogenes_serotype_1_2a_str_02-5993_1196180 | Listeria_innocua_1642 | 0.9001 |
| Listeria_monocytogenes_R479a_1437838                     | Listeria_innocua_1642 | 0.8964 |
| Listeria_monocytogenes_N53-1_1234142                     | Listeria_innocua_1642 | 0.8727 |
| Listeria_monocytogenes_M7_1030009                        | Listeria_innocua_1642 | 0.8973 |
| Listeria_monocytogenes_LO28_393132                       | Listeria_innocua_1642 | 0.9052 |
| Listeria_monocytogenes_L99_563174                        | Listeria_innocua_1642 | 0.8976 |
| Listeria_monocytogenes_L312_882094                       | Listeria_innocua_1642 | 0.9172 |
| Listeria_monocytogenes_J1816_930781                      | Listeria_innocua_1642 | 0.9172 |
| Listeria_monocytogenes_J1-220_930782                     | Listeria_innocua_1642 | 0.9063 |
| Listeria_monocytogenes_J0161_393130                      | Listeria_innocua_1642 | 0.9104 |
| Listeria_monocytogenes_HCC23_552536                      | Listeria_innocua_1642 | 0.8973 |
| Listeria_monocytogenes_FSL_R2-561_393126                 | Listeria_innocua_1642 | 0.9074 |
| Listeria_monocytogenes_FSL_J1-208_393119                 | Listeria_innocua_1642 | 0.9008 |
| Listeria_monocytogenes_FSL_J1-175_393118                 | Listeria_innocua_1642 | 0.9104 |
| Listeria_monocytogenes_Finland_1998_393127               | Listeria_innocua_1642 | 0.9131 |
| Listeria_monocytogenes_EGD-e_169963_v1                   | Listeria_innocua_1642 | 0.9155 |
| Listeria_monocytogenes_EGD-e_169963                      | Listeria_innocua_1642 | 0.9159 |
| Listeria_monocytogenes_EGD_1334565                       | Listeria_innocua_1642 | 0.91   |
| Listeria_monocytogenes_CFSAN002349_1299895               | Listeria_innocua_1642 | 0.9163 |
| Listeria_monocytogenes_ATCC_19117_882095_v1              | Listeria_innocua_1642 | 0.9142 |
| Listeria_monocytogenes_ATCC_19117_882095                 | Listeria_innocua_1642 | 0.9138 |
| Listeria_monocytogenes_6179_1288295                      | Listeria_innocua_1642 | 0.9013 |
| Listeria_monocytogenes_1639_v9                           | Listeria_innocua_1642 | 0.8972 |
| Listeria_monocytogenes_1639_v99                          | Listeria_innocua_1642 | 0.9179 |
| Listeria_monocytogenes_1639_v98                          | Listeria_innocua_1642 | 0.9092 |
| Listeria_monocytogenes_1639_v97                          | Listeria_innocua_1642 | 0.9206 |
| Listeria_monocytogenes_1639_v96                          | Listeria_innocua_1642 | 0.9165 |
| Listeria_monocytogenes_1639_v95                          | Listeria_innocua_1642 | 0.9165 |
| Listeria_monocytogenes_1639_v94                          | Listeria_innocua_1642 | 0.9169 |
| Listeria_monocytogenes_1639_v93                          | Listeria_innocua_1642 | 0.8929 |
| Listeria_monocytogenes_1639_v92                          | Listeria_innocua_1642 | 0.9191 |
| Listeria_monocytogenes_1639_v91                          | Listeria_innocua_1642 | 0.9081 |
| Listeria_monocytogenes_1639_v90                          | Listeria_innocua_1642 | 0.9092 |
| Listeria_monocytogenes_1639_v8                           | Listeria_innocua_1642 | 0.8888 |
| Listeria_monocytogenes_1639_v89                          | Listeria_innocua_1642 | 0.9158 |
| Listeria_monocytogenes_1639_v88                          | Listeria_innocua_1642 | 0.9134 |
| Listeria_monocytogenes_1639_v87                          | Listeria_innocua_1642 | 0.904  |
| Listeria_monocytogenes_1639_v86                          | Listeria_innocua_1642 | 0.9037 |
| Listeria_monocytogenes_1639_v85                          | Listeria_innocua_1642 | 0.9114 |
| Listeria_monocytogenes_1639_v84                          | Listeria_innocua_1642 | 0.9094 |
| Listeria_monocytogenes_1639_v83                          | Listeria_innocua_1642 | 0.9129 |
| Listeria_monocytogenes_1639_v82                          | Listeria_innocua_1642 | 0.9123 |
| Listeria_monocytogenes_1639_v81                          | Listeria_innocua_1642 | 0.9066 |
| Listeria_monocytogenes_1639_v80                          | Listeria_innocua_1642 | 0.9102 |
| Listeria_monocytogenes_1639_v7                           | Listeria_innocua_1642 | 0.8888 |
| Listeria_monocytogenes_1639_v79                          | Listeria_innocua_1642 | 0.9053 |
| Listeria_monocytogenes_1639_v78                          | Listeria_innocua_1642 | 0.9067 |
| Listeria_monocytogenes_1639_v77                          | Listeria_innocua_1642 | 0.9093 |
| Listeria_monocytogenes_1639_v76                          | Listeria_innocua_1642 | 0.907  |
| Listeria_monocytogenes_1639_v75                          | Listeria_innocua_1642 | 0.8976 |
| Listeria_monocytogenes_1639_v74                          | Listeria_innocua_1642 | 0.9003 |
| Listeria_monocytogenes_1639_v73                          | Listeria_innocua_1642 | 0.8993 |
| Listeria_monocytogenes_1639_v72                          | Listeria_innocua_1642 | 0.9129 |
| Listeria_monocytogenes_1639_v71                          | Listeria_innocua_1642 | 0.8947 |
| Listeria_monocytogenes_1639_v70                          | Listeria_innocua_1642 | 0.9088 |
| Listeria_monocytogenes_1639_v6                           | Listeria_innocua_1642 | 0.8885 |
| Listeria_monocytogenes_1639_v69                          | Listeria_innocua_1642 | 0.912  |
| Listeria_monocytogenes_1639_v68                          | Listeria_innocua_1642 | 0.9021 |
| Listeria_monocytogenes_1639_v67                          | Listeria_innocua_1642 | 0.9138 |
| Listeria_monocytogenes_1639_v66                          | Listeria_innocua_1642 | 0.9057 |
| Listeria_monocytogenes_1639_v65                          | Listeria_innocua_1642 | 0.899  |
| Listeria_monocytogenes_1639_v64                          | Listeria_innocua_1642 | 0.8989 |
| Listeria_monocytogenes_1639_v63                          | Listeria_innocua_1642 | 0.9087 |
| Listeria_monocytogenes_1639_v62                          | Listeria_innocua_1642 | 0.9067 |
| Listeria_monocytogenes_1639_v61                          | Listeria_innocua_1642 | 0.9038 |
| Listeria_monocytogenes_1639_v60                          | Listeria_innocua_1642 | 0.9107 |
| Listeria_monocytogenes_1639_v5                           | Listeria_innocua_1642 | 0.8738 |
| Listeria_monocytogenes_1639_v59                          | Listeria_innocua_1642 | 0.9077 |
| Listeria_monocytogenes_1639_v58                          | Listeria_innocua_1642 | 0.9152 |
| Listeria_monocytogenes_1639_v57                          | Listeria_innocua_1642 | 0.9143 |
| Listeria_monocytogenes_1639_v56                          | Listeria_innocua_1642 | 0.9204 |
| Listeria_monocytogenes_1639_v55                          | Listeria_innocua_1642 | 0.9138 |
| Listeria_monocytogenes_1639_v54                          | Listeria_innocua_1642 | 0.9138 |
| Listeria_monocytogenes_1639_v53                          | Listeria_innocua_1642 | 0.8991 |
| Listeria_monocytogenes_1639_v52                          | Listeria_innocua_1642 | 0.9132 |
| Listeria_monocytogenes_1639_v51                          | Listeria_innocua_1642 | 0.9075 |
| Listeria_monocytogenes_1639_v50                          | Listeria_innocua_1642 | 0.8993 |
| Listeria_monocytogenes_1639_v4                           | Listeria_innocua_1642 | 0.8861 |
| Listeria_monocytogenes_1639_v49                          | Listeria_innocua_1642 | 0.9027 |
| Listeria_monocytogenes_1639_v48                          | Listeria_innocua_1642 | 0.9063 |
| Listeria_monocytogenes_1639_v47                          | Listeria_innocua_1642 | 0.8997 |
| Listeria_monocytogenes_1639_v46                          | Listeria_innocua_1642 | 0.907  |
| Listeria_monocytogenes_1639_v45                          | Listeria_innocua_1642 | 0.8912 |

[illegible]



|                                                        |                          |        |
|--------------------------------------------------------|--------------------------|--------|
| Listeria_monocytogenes_1639_v141                       | Listeria_innocua_1642    | 0.9156 |
| Listeria_monocytogenes_1639_v140                       | Listeria_innocua_1642    | 0.9176 |
| Listeria_monocytogenes_1639_v13                        | Listeria_innocua_1642    | 0.8919 |
| Listeria_monocytogenes_1639_v139                       | Listeria_innocua_1642    | 0.9154 |
| Listeria_monocytogenes_1639_v138                       | Listeria_innocua_1642    | 0.9184 |
| Listeria_monocytogenes_1639_v137                       | Listeria_innocua_1642    | 0.9184 |
| Listeria_monocytogenes_1639_v136                       | Listeria_innocua_1642    | 0.9086 |
| Listeria_monocytogenes_1639_v135                       | Listeria_innocua_1642    | 0.9075 |
| Listeria_monocytogenes_1639_v134                       | Listeria_innocua_1642    | 0.9104 |
| Listeria_monocytogenes_1639_v133                       | Listeria_innocua_1642    | 0.9189 |
| Listeria_monocytogenes_1639_v132                       | Listeria_innocua_1642    | 0.902  |
| Listeria_monocytogenes_1639_v131                       | Listeria_innocua_1642    | 0.916  |
| Listeria_monocytogenes_1639_v130                       | Listeria_innocua_1642    | 0.9002 |
| Listeria_monocytogenes_1639_v12                        | Listeria_innocua_1642    | 0.8929 |
| Listeria_monocytogenes_1639_v129                       | Listeria_innocua_1642    | 0.9176 |
| Listeria_monocytogenes_1639_v128                       | Listeria_innocua_1642    | 0.9122 |
| Listeria_monocytogenes_1639_v127                       | Listeria_innocua_1642    | 0.9136 |
| Listeria_monocytogenes_1639_v126                       | Listeria_innocua_1642    | 0.9107 |
| Listeria_monocytogenes_1639_v125                       | Listeria_innocua_1642    | 0.9121 |
| Listeria_monocytogenes_1639_v124                       | Listeria_innocua_1642    | 0.9111 |
| Listeria_monocytogenes_1639_v123                       | Listeria_innocua_1642    | 0.9163 |
| Listeria_monocytogenes_1639_v122                       | Listeria_innocua_1642    | 0.9163 |
| Listeria_monocytogenes_1639_v121                       | Listeria_innocua_1642    | 0.9163 |
| Listeria_monocytogenes_1639_v120                       | Listeria_innocua_1642    | 0.9163 |
| Listeria_monocytogenes_1639_v11                        | Listeria_innocua_1642    | 0.8971 |
| Listeria_monocytogenes_1639_v119                       | Listeria_innocua_1642    | 0.9163 |
| Listeria_monocytogenes_1639_v118                       | Listeria_innocua_1642    | 0.9163 |
| Listeria_monocytogenes_1639_v117                       | Listeria_innocua_1642    | 0.9049 |
| Listeria_monocytogenes_1639_v116                       | Listeria_innocua_1642    | 0.9103 |
| Listeria_monocytogenes_1639_v115                       | Listeria_innocua_1642    | 0.9107 |
| Listeria_monocytogenes_1639_v114                       | Listeria_innocua_1642    | 0.9124 |
| Listeria_monocytogenes_1639_v113                       | Listeria_innocua_1642    | 0.9129 |
| Listeria_monocytogenes_1639_v112                       | Listeria_innocua_1642    | 0.9212 |
| Listeria_monocytogenes_1639_v111                       | Listeria_innocua_1642    | 0.9006 |
| Listeria_monocytogenes_1639_v110                       | Listeria_innocua_1642    | 0.9084 |
| Listeria_monocytogenes_1639_v10                        | Listeria_innocua_1642    | 0.8935 |
| Listeria_monocytogenes_1639_v109                       | Listeria_innocua_1642    | 0.9132 |
| Listeria_monocytogenes_1639_v108                       | Listeria_innocua_1642    | 0.9177 |
| Listeria_monocytogenes_1639_v107                       | Listeria_innocua_1642    | 0.9128 |
| Listeria_monocytogenes_1639_v106                       | Listeria_innocua_1642    | 0.9132 |
| Listeria_monocytogenes_1639_v105                       | Listeria_innocua_1642    | 0.9132 |
| Listeria_monocytogenes_1639_v104                       | Listeria_innocua_1642    | 0.9132 |
| Listeria_monocytogenes_1639_v103                       | Listeria_innocua_1642    | 0.9135 |
| Listeria_monocytogenes_1639_v102                       | Listeria_innocua_1642    | 0.9076 |
| Listeria_monocytogenes_1639_v101                       | Listeria_innocua_1642    | 0.8965 |
| Listeria_monocytogenes_1639_v100                       | Listeria_innocua_1642    | 0.8951 |
| Listeria_monocytogenes_1639                            | Listeria_innocua_1642    | 0.918  |
| Listeria_monocytogenes_10403S_393133                   | Listeria_innocua_1642    | 0.9167 |
| Listeria_monocytogenes_08-5923_637381                  | Listeria_innocua_1642    | 0.9001 |
| Listeria_monocytogenes_08-5578_653938                  | Listeria_innocua_1642    | 0.8873 |
| Listeria_monocytogenes_07PF0776_1126011                | Listeria_innocua_1642    | 0.9131 |
| Listeria_marthii_FSL_S4-120_702457                     | Listeria_innocua_1642    | 0.8514 |
| Listeria_marthii_529731_v1                             | Listeria_innocua_1642    | 0.8958 |
| Listeria_marthii_529731                                | Listeria_innocua_1642    | 0.8958 |
| Listeria_ivanovii_WSLC3009_1457190                     | Listeria_innocua_1642    | 0.8714 |
| Listeria_ivanovii_subsp_londoniensis_202752_v2         | Listeria_innocua_1642    | 0.869  |
| Listeria_ivanovii_subsp_londoniensis_202752_v1         | Listeria_innocua_1642    | 0.8616 |
| Listeria_ivanovii_subsp_londoniensis_202752            | Listeria_innocua_1642    | 0.874  |
| Listeria_ivanovii_subsp_ivanovii_PAM_55_881621         | Listeria_innocua_1642    | 0.8702 |
| Listeria_ivanovii_subsp_ivanovii_202751_v2             | Listeria_innocua_1642    | 0.8718 |
| Listeria_ivanovii_subsp_ivanovii_202751_v1             | Listeria_innocua_1642    | 0.8718 |
| Listeria_ivanovii_subsp_ivanovii_202751                | Listeria_innocua_1642    | 0.8718 |
| Listeria_ivanovii_FSL_F6-596_702454                    | Listeria_innocua_1642    | 0.8145 |
| Listeria_ivanovii_1638                                 | Listeria_innocua_1642    | 0.8718 |
| Listeria_innocua_FSL_S4-378_702456                     | Listeria_innocua_1642    | 0.8381 |
| Listeria_innocua_FSL_J1-023_702455                     | Listeria_innocua_1642    | 0.8753 |
| Listeria_innocua_Clip11262_272626                      | Listeria_innocua_1642    | 0.9222 |
| Listeria_innocua_1642_v4                               | Listeria_innocua_1642    | 0.9054 |
| Listeria_innocua_1642_v3                               | Listeria_innocua_1642    | 0.9181 |
| Listeria_innocua_1642_v2                               | Listeria_innocua_1642    | 0.9113 |
| Listeria_innocua_1642_v1                               | Listeria_innocua_1642    | 0.9422 |
| Listeria_innocua_1642                                  | Listeria_innocua_1642    | 0.0749 |
| Listeria_welshimeri_1643                               | Listeria_innocua_1642_v1 | 0.8726 |
| Listeria_welshimeri_serovar_6b_str_SLCC5334_386043     | Listeria_innocua_1642_v1 | 0.8719 |
| Listeria_seeligeri_serovar_1_2b_str_SLCC3954_683837    | Listeria_innocua_1642_v1 | 0.8674 |
| Listeria_seeligeri_FSL_S4-171_702452                   | Listeria_innocua_1642_v1 | 0.8261 |
| Listeria_seeligeri_FSL_N1-067_702453                   | Listeria_innocua_1642_v1 | 0.821  |
| Listeria_seeligeri_1640_v1                             | Listeria_innocua_1642_v1 | 0.872  |
| Listeria_seeligeri_1640                                | Listeria_innocua_1642_v1 | 0.8711 |
| Listeria_monocytogenes_WSLC1042_1457188                | Listeria_innocua_1642_v1 | 0.9103 |
| Listeria_monocytogenes_WSLC1001_1457187                | Listeria_innocua_1642_v1 | 0.9016 |
| Listeria_monocytogenes_SLCC7179_879090                 | Listeria_innocua_1642_v1 | 0.9102 |
| Listeria_monocytogenes_SLCC5850_882096                 | Listeria_innocua_1642_v1 | 0.9049 |
| Listeria_monocytogenes_SLCC2755_932919                 | Listeria_innocua_1642_v1 | 0.9125 |
| Listeria_monocytogenes_SLCC2540_879089                 | Listeria_innocua_1642_v1 | 0.9031 |
| Listeria_monocytogenes_SLCC2479_882020                 | Listeria_innocua_1642_v1 | 0.9068 |
| Listeria_monocytogenes_SLCC2378_879088                 | Listeria_innocua_1642_v1 | 0.9117 |
| Listeria_monocytogenes_SLCC2376_882097                 | Listeria_innocua_1642_v1 | 0.922  |
| Listeria_monocytogenes_SLCC2372_932920                 | Listeria_innocua_1642_v1 | 0.9145 |
| Listeria_monocytogenes_serotype_4b_str_LL195_1230340   | Listeria_innocua_1642_v1 | 0.9149 |
| Listeria_monocytogenes_serotype_4b_str_LIS0087_1134669 | Listeria_innocua_1642_v1 | 0.8855 |

|                                                          |                          |        |
|----------------------------------------------------------|--------------------------|--------|
| Listeria_monocytogenes_serotype_4b_str_F2365_265669      | Listeria_innocua_1642_v1 | 0.9149 |
| Listeria_monocytogenes_serotype_4b_str_CLIP_80459_568819 | Listeria_innocua_1642_v1 | 0.9182 |
| Listeria_monocytogenes_serotype_4b_str_81-0861_1196161   | Listeria_innocua_1642_v1 | 0.9078 |
| Listeria_monocytogenes_serotype_4b_str_81-0592_1196160   | Listeria_innocua_1642_v1 | 0.9089 |
| Listeria_monocytogenes_serotype_4b_str_81-0558_1196159   | Listeria_innocua_1642_v1 | 0.9099 |
| Listeria_monocytogenes_serotype_4b_str_10-0809_1196162   | Listeria_innocua_1642_v1 | 0.9092 |
| Listeria_monocytogenes_serotype_4b_str_02-6680_1196175   | Listeria_innocua_1642_v1 | 0.9139 |
| Listeria_monocytogenes_serotype_4b_str_02-6679_1196174   | Listeria_innocua_1642_v1 | 0.9139 |
| Listeria_monocytogenes_serotype_4b_str_02-1792_1196173   | Listeria_innocua_1642_v1 | 0.9088 |
| Listeria_monocytogenes_serotype_4b_str_02-1289_1196172   | Listeria_innocua_1642_v1 | 0.9088 |
| Listeria_monocytogenes_serotype_4b_str_02-1103_1196171   | Listeria_innocua_1642_v1 | 0.9088 |
| Listeria_monocytogenes_serotype_3c_str_10-5027_1196195   | Listeria_innocua_1642_v1 | 0.9071 |
| Listeria_monocytogenes_serotype_1_2c_str_10-5026_1196194 | Listeria_innocua_1642_v1 | 0.9079 |
| Listeria_monocytogenes_serotype_1_2c_str_10-5025_1196193 | Listeria_innocua_1642_v1 | 0.9079 |
| Listeria_monocytogenes_serotype_1_2b_str_10-0811_1196164 | Listeria_innocua_1642_v1 | 0.8968 |
| Listeria_monocytogenes_serotype_1_2b_str_10-0810_1196163 | Listeria_innocua_1642_v1 | 0.8968 |
| Listeria_monocytogenes_serotype_1_2a_str_99-6370_1196179 | Listeria_innocua_1642_v1 | 0.8922 |
| Listeria_monocytogenes_serotype_1_2a_str_98-2035_1196178 | Listeria_innocua_1642_v1 | 0.8922 |
| Listeria_monocytogenes_serotype_1_2a_str_95-0093_1196177 | Listeria_innocua_1642_v1 | 0.897  |
| Listeria_monocytogenes_serotype_1_2a_str_88-0478_1196176 | Listeria_innocua_1642_v1 | 0.8962 |
| Listeria_monocytogenes_serotype_1_2a_str_10-5024_1196192 | Listeria_innocua_1642_v1 | 0.8974 |
| Listeria_monocytogenes_serotype_1_2a_str_10-4758_1196168 | Listeria_innocua_1642_v1 | 0.9032 |
| Listeria_monocytogenes_serotype_1_2a_str_10-4754_1196167 | Listeria_innocua_1642_v1 | 0.9032 |
| Listeria_monocytogenes_serotype_1_2a_str_10-1321_1196191 | Listeria_innocua_1642_v1 | 0.8974 |
| Listeria_monocytogenes_serotype_1_2a_str_10-1047_1196190 | Listeria_innocua_1642_v1 | 0.8973 |
| Listeria_monocytogenes_serotype_1_2a_str_10-1046_1196189 | Listeria_innocua_1642_v1 | 0.8973 |
| Listeria_monocytogenes_serotype_1_2a_str_10-0934_1196170 | Listeria_innocua_1642_v1 | 0.9126 |
| Listeria_monocytogenes_serotype_1_2a_str_10-0933_1196169 | Listeria_innocua_1642_v1 | 0.9126 |
| Listeria_monocytogenes_serotype_1_2a_str_10-0815_1196188 | Listeria_innocua_1642_v1 | 0.8931 |
| Listeria_monocytogenes_serotype_1_2a_str_10-0814_1196187 | Listeria_innocua_1642_v1 | 0.8974 |
| Listeria_monocytogenes_serotype_1_2a_str_10-0813_1196166 | Listeria_innocua_1642_v1 | 0.9046 |
| Listeria_monocytogenes_serotype_1_2a_str_10-0812_1196165 | Listeria_innocua_1642_v1 | 0.9046 |
| Listeria_monocytogenes_serotype_1_2a_str_08-7669_1196186 | Listeria_innocua_1642_v1 | 0.9049 |
| Listeria_monocytogenes_serotype_1_2a_str_08-7374_1196185 | Listeria_innocua_1642_v1 | 0.8974 |
| Listeria_monocytogenes_serotype_1_2a_str_08-6997_1196184 | Listeria_innocua_1642_v1 | 0.8931 |
| Listeria_monocytogenes_serotype_1_2a_str_08-6569_1196183 | Listeria_innocua_1642_v1 | 0.8931 |
| Listeria_monocytogenes_serotype_1_2a_str_08-6056_1196182 | Listeria_innocua_1642_v1 | 0.8931 |
| Listeria_monocytogenes_serotype_1_2a_str_04-5457_1196181 | Listeria_innocua_1642_v1 | 0.8974 |
| Listeria_monocytogenes_serotype_1_2a_str_02-5993_1196180 | Listeria_innocua_1642_v1 | 0.897  |
| Listeria_monocytogenes_R479a_1437838                     | Listeria_innocua_1642_v1 | 0.9041 |
| Listeria_monocytogenes_N53-1_1234142                     | Listeria_innocua_1642_v1 | 0.8669 |
| Listeria_monocytogenes_M7_1030009                        | Listeria_innocua_1642_v1 | 0.8913 |
| Listeria_monocytogenes_LO28_393132                       | Listeria_innocua_1642_v1 | 0.9036 |
| Listeria_monocytogenes_L99_563174                        | Listeria_innocua_1642_v1 | 0.8919 |
| Listeria_monocytogenes_L312_882094                       | Listeria_innocua_1642_v1 | 0.9182 |
| Listeria_monocytogenes_J1816_930781                      | Listeria_innocua_1642_v1 | 0.9122 |
| Listeria_monocytogenes_J1-220_930782                     | Listeria_innocua_1642_v1 | 0.9007 |
| Listeria_monocytogenes_J0161_393130                      | Listeria_innocua_1642_v1 | 0.9058 |
| Listeria_monocytogenes_HCC23_552536                      | Listeria_innocua_1642_v1 | 0.8916 |
| Listeria_monocytogenes_FSL_R2-561_393126                 | Listeria_innocua_1642_v1 | 0.9043 |
| Listeria_monocytogenes_FSL_J1-208_393119                 | Listeria_innocua_1642_v1 | 0.9034 |
| Listeria_monocytogenes_FSL_J1-175_393118                 | Listeria_innocua_1642_v1 | 0.9012 |
| Listeria_monocytogenes_Finland_1998_393127               | Listeria_innocua_1642_v1 | 0.9115 |
| Listeria_monocytogenes_EGD-e_169963_v1                   | Listeria_innocua_1642_v1 | 0.9135 |
| Listeria_monocytogenes_EGD-e_169963                      | Listeria_innocua_1642_v1 | 0.9139 |
| Listeria_monocytogenes_EGD_1334565                       | Listeria_innocua_1642_v1 | 0.9057 |
| Listeria_monocytogenes_CFSAN002349_1299895               | Listeria_innocua_1642_v1 | 0.9128 |
| Listeria_monocytogenes_ATCC_19117_882095_v1              | Listeria_innocua_1642_v1 | 0.9126 |
| Listeria_monocytogenes_ATCC_19117_882095                 | Listeria_innocua_1642_v1 | 0.9125 |
| Listeria_monocytogenes_6179_1288295                      | Listeria_innocua_1642_v1 | 0.9016 |
| Listeria_monocytogenes_1639_v9                           | Listeria_innocua_1642_v1 | 0.8861 |
| Listeria_monocytogenes_1639_v99                          | Listeria_innocua_1642_v1 | 0.9219 |
| Listeria_monocytogenes_1639_v98                          | Listeria_innocua_1642_v1 | 0.9075 |
| Listeria_monocytogenes_1639_v97                          | Listeria_innocua_1642_v1 | 0.9115 |
| Listeria_monocytogenes_1639_v96                          | Listeria_innocua_1642_v1 | 0.9219 |
| Listeria_monocytogenes_1639_v95                          | Listeria_innocua_1642_v1 | 0.922  |
| Listeria_monocytogenes_1639_v94                          | Listeria_innocua_1642_v1 | 0.9223 |
| Listeria_monocytogenes_1639_v93                          | Listeria_innocua_1642_v1 | 0.8973 |
| Listeria_monocytogenes_1639_v92                          | Listeria_innocua_1642_v1 | 0.9189 |
| Listeria_monocytogenes_1639_v91                          | Listeria_innocua_1642_v1 | 0.9039 |
| Listeria_monocytogenes_1639_v90                          | Listeria_innocua_1642_v1 | 0.9075 |
| Listeria_monocytogenes_1639_v8                           | Listeria_innocua_1642_v1 | 0.8979 |
| Listeria_monocytogenes_1639_v89                          | Listeria_innocua_1642_v1 | 0.9104 |
| Listeria_monocytogenes_1639_v88                          | Listeria_innocua_1642_v1 | 0.9062 |
| Listeria_monocytogenes_1639_v87                          | Listeria_innocua_1642_v1 | 0.8991 |
| Listeria_monocytogenes_1639_v86                          | Listeria_innocua_1642_v1 | 0.8987 |
| Listeria_monocytogenes_1639_v85                          | Listeria_innocua_1642_v1 | 0.9072 |
| Listeria_monocytogenes_1639_v84                          | Listeria_innocua_1642_v1 | 0.9074 |
| Listeria_monocytogenes_1639_v83                          | Listeria_innocua_1642_v1 | 0.9091 |
| Listeria_monocytogenes_1639_v82                          | Listeria_innocua_1642_v1 | 0.9084 |
| Listeria_monocytogenes_1639_v81                          | Listeria_innocua_1642_v1 | 0.905  |
| Listeria_monocytogenes_1639_v80                          | Listeria_innocua_1642_v1 | 0.8992 |
| Listeria_monocytogenes_1639_v7                           | Listeria_innocua_1642_v1 | 0.8979 |
| Listeria_monocytogenes_1639_v79                          | Listeria_innocua_1642_v1 | 0.9041 |
| Listeria_monocytogenes_1639_v78                          | Listeria_innocua_1642_v1 | 0.9047 |
| Listeria_monocytogenes_1639_v77                          | Listeria_innocua_1642_v1 | 0.9119 |
| Listeria_monocytogenes_1639_v76                          | Listeria_innocua_1642_v1 | 0.8984 |
| Listeria_monocytogenes_1639_v75                          | Listeria_innocua_1642_v1 | 0.8919 |
| Listeria_monocytogenes_1639_v74                          | Listeria_innocua_1642_v1 | 0.9017 |
| Listeria_monocytogenes_1639_v73                          | Listeria_innocua_1642_v1 | 0.9078 |
| Listeria_monocytogenes_1639_v72                          | Listeria_innocua_1642_v1 | 0.9071 |

[illegible]

|                                                |                          |        |
|------------------------------------------------|--------------------------|--------|
| Listeria_monocytogenes_1639_v169               | Listeria_innocua_1642_v1 | 0.9079 |
| Listeria_monocytogenes_1639_v168               | Listeria_innocua_1642_v1 | 0.9081 |
| Listeria_monocytogenes_1639_v167               | Listeria_innocua_1642_v1 | 0.9115 |
| Listeria_monocytogenes_1639_v166               | Listeria_innocua_1642_v1 | 0.9085 |
| Listeria_monocytogenes_1639_v165               | Listeria_innocua_1642_v1 | 0.9075 |
| Listeria_monocytogenes_1639_v164               | Listeria_innocua_1642_v1 | 0.914  |
| Listeria_monocytogenes_1639_v163               | Listeria_innocua_1642_v1 | 0.9149 |
| Listeria_monocytogenes_1639_v162               | Listeria_innocua_1642_v1 | 0.914  |
| Listeria_monocytogenes_1639_v161               | Listeria_innocua_1642_v1 | 0.9152 |
| Listeria_monocytogenes_1639_v160               | Listeria_innocua_1642_v1 | 0.9152 |
| Listeria_monocytogenes_1639_v15                | Listeria_innocua_1642_v1 | 0.8977 |
| Listeria_monocytogenes_1639_v159               | Listeria_innocua_1642_v1 | 0.9128 |
| Listeria_monocytogenes_1639_v158               | Listeria_innocua_1642_v1 | 0.9149 |
| Listeria_monocytogenes_1639_v157               | Listeria_innocua_1642_v1 | 0.9149 |
| Listeria_monocytogenes_1639_v156               | Listeria_innocua_1642_v1 | 0.9019 |
| Listeria_monocytogenes_1639_v155               | Listeria_innocua_1642_v1 | 0.9172 |
| Listeria_monocytogenes_1639_v154               | Listeria_innocua_1642_v1 | 0.9059 |
| Listeria_monocytogenes_1639_v153               | Listeria_innocua_1642_v1 | 0.9134 |
| Listeria_monocytogenes_1639_v152               | Listeria_innocua_1642_v1 | 0.9131 |
| Listeria_monocytogenes_1639_v151               | Listeria_innocua_1642_v1 | 0.9131 |
| Listeria_monocytogenes_1639_v150               | Listeria_innocua_1642_v1 | 0.9062 |
| Listeria_monocytogenes_1639_v14                | Listeria_innocua_1642_v1 | 0.8925 |
| Listeria_monocytogenes_1639_v149               | Listeria_innocua_1642_v1 | 0.9057 |
| Listeria_monocytogenes_1639_v148               | Listeria_innocua_1642_v1 | 0.9117 |
| Listeria_monocytogenes_1639_v147               | Listeria_innocua_1642_v1 | 0.9022 |
| Listeria_monocytogenes_1639_v146               | Listeria_innocua_1642_v1 | 0.9127 |
| Listeria_monocytogenes_1639_v145               | Listeria_innocua_1642_v1 | 0.9111 |
| Listeria_monocytogenes_1639_v144               | Listeria_innocua_1642_v1 | 0.9175 |
| Listeria_monocytogenes_1639_v143               | Listeria_innocua_1642_v1 | 0.9113 |
| Listeria_monocytogenes_1639_v142               | Listeria_innocua_1642_v1 | 0.9179 |
| Listeria_monocytogenes_1639_v141               | Listeria_innocua_1642_v1 | 0.9132 |
| Listeria_monocytogenes_1639_v140               | Listeria_innocua_1642_v1 | 0.9182 |
| Listeria_monocytogenes_1639_v13                | Listeria_innocua_1642_v1 | 0.8981 |
| Listeria_monocytogenes_1639_v139               | Listeria_innocua_1642_v1 | 0.9142 |
| Listeria_monocytogenes_1639_v138               | Listeria_innocua_1642_v1 | 0.9168 |
| Listeria_monocytogenes_1639_v137               | Listeria_innocua_1642_v1 | 0.9164 |
| Listeria_monocytogenes_1639_v136               | Listeria_innocua_1642_v1 | 0.9029 |
| Listeria_monocytogenes_1639_v135               | Listeria_innocua_1642_v1 | 0.9044 |
| Listeria_monocytogenes_1639_v134               | Listeria_innocua_1642_v1 | 0.9114 |
| Listeria_monocytogenes_1639_v133               | Listeria_innocua_1642_v1 | 0.9146 |
| Listeria_monocytogenes_1639_v132               | Listeria_innocua_1642_v1 | 0.9004 |
| Listeria_monocytogenes_1639_v131               | Listeria_innocua_1642_v1 | 0.908  |
| Listeria_monocytogenes_1639_v130               | Listeria_innocua_1642_v1 | 0.9142 |
| Listeria_monocytogenes_1639_v12                | Listeria_innocua_1642_v1 | 0.8994 |
| Listeria_monocytogenes_1639_v129               | Listeria_innocua_1642_v1 | 0.9133 |
| Listeria_monocytogenes_1639_v128               | Listeria_innocua_1642_v1 | 0.9143 |
| Listeria_monocytogenes_1639_v127               | Listeria_innocua_1642_v1 | 0.9079 |
| Listeria_monocytogenes_1639_v126               | Listeria_innocua_1642_v1 | 0.9128 |
| Listeria_monocytogenes_1639_v125               | Listeria_innocua_1642_v1 | 0.909  |
| Listeria_monocytogenes_1639_v124               | Listeria_innocua_1642_v1 | 0.9132 |
| Listeria_monocytogenes_1639_v123               | Listeria_innocua_1642_v1 | 0.9128 |
| Listeria_monocytogenes_1639_v122               | Listeria_innocua_1642_v1 | 0.9132 |
| Listeria_monocytogenes_1639_v121               | Listeria_innocua_1642_v1 | 0.9132 |
| Listeria_monocytogenes_1639_v120               | Listeria_innocua_1642_v1 | 0.9128 |
| Listeria_monocytogenes_1639_v11                | Listeria_innocua_1642_v1 | 0.8984 |
| Listeria_monocytogenes_1639_v119               | Listeria_innocua_1642_v1 | 0.9132 |
| Listeria_monocytogenes_1639_v118               | Listeria_innocua_1642_v1 | 0.9132 |
| Listeria_monocytogenes_1639_v117               | Listeria_innocua_1642_v1 | 0.9006 |
| Listeria_monocytogenes_1639_v116               | Listeria_innocua_1642_v1 | 0.911  |
| Listeria_monocytogenes_1639_v115               | Listeria_innocua_1642_v1 | 0.9113 |
| Listeria_monocytogenes_1639_v114               | Listeria_innocua_1642_v1 | 0.9097 |
| Listeria_monocytogenes_1639_v113               | Listeria_innocua_1642_v1 | 0.904  |
| Listeria_monocytogenes_1639_v112               | Listeria_innocua_1642_v1 | 0.9181 |
| Listeria_monocytogenes_1639_v111               | Listeria_innocua_1642_v1 | 0.9159 |
| Listeria_monocytogenes_1639_v110               | Listeria_innocua_1642_v1 | 0.9034 |
| Listeria_monocytogenes_1639_v10                | Listeria_innocua_1642_v1 | 0.8843 |
| Listeria_monocytogenes_1639_v109               | Listeria_innocua_1642_v1 | 0.9086 |
| Listeria_monocytogenes_1639_v108               | Listeria_innocua_1642_v1 | 0.9085 |
| Listeria_monocytogenes_1639_v107               | Listeria_innocua_1642_v1 | 0.9112 |
| Listeria_monocytogenes_1639_v106               | Listeria_innocua_1642_v1 | 0.9115 |
| Listeria_monocytogenes_1639_v105               | Listeria_innocua_1642_v1 | 0.9115 |
| Listeria_monocytogenes_1639_v104               | Listeria_innocua_1642_v1 | 0.9119 |
| Listeria_monocytogenes_1639_v103               | Listeria_innocua_1642_v1 | 0.9119 |
| Listeria_monocytogenes_1639_v102               | Listeria_innocua_1642_v1 | 0.9074 |
| Listeria_monocytogenes_1639_v101               | Listeria_innocua_1642_v1 | 0.9045 |
| Listeria_monocytogenes_1639_v100               | Listeria_innocua_1642_v1 | 0.9028 |
| Listeria_monocytogenes_1639                    | Listeria_innocua_1642_v1 | 0.9148 |
| Listeria_monocytogenes_10403S_393133           | Listeria_innocua_1642_v1 | 0.9124 |
| Listeria_monocytogenes_08-5923_637381          | Listeria_innocua_1642_v1 | 0.8974 |
| Listeria_monocytogenes_08-5578_653938          | Listeria_innocua_1642_v1 | 0.8924 |
| Listeria_monocytogenes_07PF0776_1126011        | Listeria_innocua_1642_v1 | 0.9123 |
| Listeria_marthii_FSL_S4-120_702457             | Listeria_innocua_1642_v1 | 0.8561 |
| Listeria_marthii_529731_v1                     | Listeria_innocua_1642_v1 | 0.8953 |
| Listeria_marthii_529731                        | Listeria_innocua_1642_v1 | 0.8927 |
| Listeria_ivanovii_WSLC3009_1457190             | Listeria_innocua_1642_v1 | 0.868  |
| Listeria_ivanovii_subsp_londoniensis_202752_v2 | Listeria_innocua_1642_v1 | 0.8705 |
| Listeria_ivanovii_subsp_londoniensis_202752_v1 | Listeria_innocua_1642_v1 | 0.8612 |
| Listeria_ivanovii_subsp_londoniensis_202752    | Listeria_innocua_1642_v1 | 0.874  |
| Listeria_ivanovii_subsp_ivanovii_PAM_55_881621 | Listeria_innocua_1642_v1 | 0.8675 |
| Listeria_ivanovii_subsp_ivanovii_202751_v2     | Listeria_innocua_1642_v1 | 0.8687 |
| Listeria_ivanovii_subsp_ivanovii_202751_v1     | Listeria_innocua_1642_v1 | 0.8687 |

|                                                          |                          |        |
|----------------------------------------------------------|--------------------------|--------|
| Listeria_ivanovii_subsp_ivanovii_202751                  | Listeria_innocua_1642_v1 | 0.8687 |
| Listeria_ivanovii_FSL_F6-596_702454                      | Listeria_innocua_1642_v1 | 0.8143 |
| Listeria_ivanovii_1638                                   | Listeria_innocua_1642_v1 | 0.8684 |
| Listeria_innocua_FSL_S4-378_702456                       | Listeria_innocua_1642_v1 | 0.8389 |
| Listeria_innocua_FSL_J1-023_702455                       | Listeria_innocua_1642_v1 | 0.8699 |
| Listeria_innocua_Clip11262_272626                        | Listeria_innocua_1642_v1 | 0.9159 |
| Listeria_innocua_1642_v4                                 | Listeria_innocua_1642_v1 | 0.9202 |
| Listeria_innocua_1642_v3                                 | Listeria_innocua_1642_v1 | 0.9313 |
| Listeria_innocua_1642_v2                                 | Listeria_innocua_1642_v1 | 0.9283 |
| Listeria_innocua_1642_v1                                 | Listeria_innocua_1642_v1 | 0.0632 |
| Listeria_welshimeri_1643                                 | Listeria_innocua_1642_v2 | 0.8788 |
| Listeria_welshimeri_serovar_6b_str_SLCC5334_386043       | Listeria_innocua_1642_v2 | 0.8784 |
| Listeria_seeligeri_serovar_1_2b_str_SLCC3954_683837      | Listeria_innocua_1642_v2 | 0.8606 |
| Listeria_seeligeri_FSL_S4-171_702452                     | Listeria_innocua_1642_v2 | 0.8076 |
| Listeria_seeligeri_FSL_N1-067_702453                     | Listeria_innocua_1642_v2 | 0.8102 |
| Listeria_seeligeri_1640_v1                               | Listeria_innocua_1642_v2 | 0.8661 |
| Listeria_seeligeri_1640                                  | Listeria_innocua_1642_v2 | 0.8567 |
| Listeria_monocytogenes_WSLC1042_1457188                  | Listeria_innocua_1642_v2 | 0.9019 |
| Listeria_monocytogenes_WSLC1001_1457187                  | Listeria_innocua_1642_v2 | 0.8978 |
| Listeria_monocytogenes_SLCC7179_879090                   | Listeria_innocua_1642_v2 | 0.9011 |
| Listeria_monocytogenes_SLCC5850_882096                   | Listeria_innocua_1642_v2 | 0.9015 |
| Listeria_monocytogenes_SLCC2755_932919                   | Listeria_innocua_1642_v2 | 0.9008 |
| Listeria_monocytogenes_SLCC2540_879089                   | Listeria_innocua_1642_v2 | 0.8997 |
| Listeria_monocytogenes_SLCC2479_882020                   | Listeria_innocua_1642_v2 | 0.8956 |
| Listeria_monocytogenes_SLCC2378_879088                   | Listeria_innocua_1642_v2 | 0.9029 |
| Listeria_monocytogenes_SLCC2376_882097                   | Listeria_innocua_1642_v2 | 0.9168 |
| Listeria_monocytogenes_SLCC2372_932920                   | Listeria_innocua_1642_v2 | 0.8978 |
| Listeria_monocytogenes_serotype_4b_str_LL195_1230340     | Listeria_innocua_1642_v2 | 0.9068 |
| Listeria_monocytogenes_serotype_4b_str_LIS0087_1134669   | Listeria_innocua_1642_v2 | 0.8768 |
| Listeria_monocytogenes_serotype_4b_str_F2365_265669      | Listeria_innocua_1642_v2 | 0.9068 |
| Listeria_monocytogenes_serotype_4b_str_CLIP_80459_568819 | Listeria_innocua_1642_v2 | 0.9086 |
| Listeria_monocytogenes_serotype_4b_str_81-0861_1196161   | Listeria_innocua_1642_v2 | 0.894  |
| Listeria_monocytogenes_serotype_4b_str_81-0592_1196160   | Listeria_innocua_1642_v2 | 0.895  |
| Listeria_monocytogenes_serotype_4b_str_81-0558_1196159   | Listeria_innocua_1642_v2 | 0.8957 |
| Listeria_monocytogenes_serotype_4b_str_10-0809_1196162   | Listeria_innocua_1642_v2 | 0.8954 |
| Listeria_monocytogenes_serotype_4b_str_02-6680_1196175   | Listeria_innocua_1642_v2 | 0.9095 |
| Listeria_monocytogenes_serotype_4b_str_02-6679_1196174   | Listeria_innocua_1642_v2 | 0.9095 |
| Listeria_monocytogenes_serotype_4b_str_02-1792_1196173   | Listeria_innocua_1642_v2 | 0.8957 |
| Listeria_monocytogenes_serotype_4b_str_02-1289_1196172   | Listeria_innocua_1642_v2 | 0.8957 |
| Listeria_monocytogenes_serotype_4b_str_02-1103_1196171   | Listeria_innocua_1642_v2 | 0.8957 |
| Listeria_monocytogenes_serotype_3c_str_10-5027_1196195   | Listeria_innocua_1642_v2 | 0.8951 |
| Listeria_monocytogenes_serotype_1_2c_str_10-5026_1196194 | Listeria_innocua_1642_v2 | 0.8956 |
| Listeria_monocytogenes_serotype_1_2c_str_10-5025_1196193 | Listeria_innocua_1642_v2 | 0.8956 |
| Listeria_monocytogenes_serotype_1_2b_str_10-0811_1196164 | Listeria_innocua_1642_v2 | 0.8886 |
| Listeria_monocytogenes_serotype_1_2b_str_10-0810_1196163 | Listeria_innocua_1642_v2 | 0.8886 |
| Listeria_monocytogenes_serotype_1_2a_str_99-6370_1196179 | Listeria_innocua_1642_v2 | 0.8793 |
| Listeria_monocytogenes_serotype_1_2a_str_98-2035_1196178 | Listeria_innocua_1642_v2 | 0.8793 |
| Listeria_monocytogenes_serotype_1_2a_str_95-0093_1196177 | Listeria_innocua_1642_v2 | 0.8834 |
| Listeria_monocytogenes_serotype_1_2a_str_88-0478_1196176 | Listeria_innocua_1642_v2 | 0.8819 |
| Listeria_monocytogenes_serotype_1_2a_str_10-5024_1196192 | Listeria_innocua_1642_v2 | 0.883  |
| Listeria_monocytogenes_serotype_1_2a_str_10-4758_1196168 | Listeria_innocua_1642_v2 | 0.8972 |
| Listeria_monocytogenes_serotype_1_2a_str_10-4754_1196167 | Listeria_innocua_1642_v2 | 0.8975 |
| Listeria_monocytogenes_serotype_1_2a_str_10-1321_1196191 | Listeria_innocua_1642_v2 | 0.883  |
| Listeria_monocytogenes_serotype_1_2a_str_10-1047_1196190 | Listeria_innocua_1642_v2 | 0.8844 |
| Listeria_monocytogenes_serotype_1_2a_str_10-1046_1196189 | Listeria_innocua_1642_v2 | 0.8844 |
| Listeria_monocytogenes_serotype_1_2a_str_10-0934_1196170 | Listeria_innocua_1642_v2 | 0.906  |
| Listeria_monocytogenes_serotype_1_2a_str_10-0933_1196169 | Listeria_innocua_1642_v2 | 0.906  |
| Listeria_monocytogenes_serotype_1_2a_str_10-0815_1196188 | Listeria_innocua_1642_v2 | 0.8803 |
| Listeria_monocytogenes_serotype_1_2a_str_10-0814_1196187 | Listeria_innocua_1642_v2 | 0.8834 |
| Listeria_monocytogenes_serotype_1_2a_str_10-0813_1196166 | Listeria_innocua_1642_v2 | 0.8952 |
| Listeria_monocytogenes_serotype_1_2a_str_10-0812_1196165 | Listeria_innocua_1642_v2 | 0.8952 |
| Listeria_monocytogenes_serotype_1_2a_str_08-7669_1196186 | Listeria_innocua_1642_v2 | 0.8881 |
| Listeria_monocytogenes_serotype_1_2a_str_08-7374_1196185 | Listeria_innocua_1642_v2 | 0.883  |
| Listeria_monocytogenes_serotype_1_2a_str_08-6997_1196184 | Listeria_innocua_1642_v2 | 0.8803 |
| Listeria_monocytogenes_serotype_1_2a_str_08-6569_1196183 | Listeria_innocua_1642_v2 | 0.8803 |
| Listeria_monocytogenes_serotype_1_2a_str_08-6056_1196182 | Listeria_innocua_1642_v2 | 0.8803 |
| Listeria_monocytogenes_serotype_1_2a_str_04-5457_1196181 | Listeria_innocua_1642_v2 | 0.883  |
| Listeria_monocytogenes_serotype_1_2a_str_02-5993_1196180 | Listeria_innocua_1642_v2 | 0.883  |
| Listeria_monocytogenes_R479a_1437838                     | Listeria_innocua_1642_v2 | 0.8875 |
| Listeria_monocytogenes_N53-1_1234142                     | Listeria_innocua_1642_v2 | 0.8587 |
| Listeria_monocytogenes_M7_1030009                        | Listeria_innocua_1642_v2 | 0.8894 |
| Listeria_monocytogenes_LO28_393132                       | Listeria_innocua_1642_v2 | 0.8957 |
| Listeria_monocytogenes_L99_563174                        | Listeria_innocua_1642_v2 | 0.8897 |
| Listeria_monocytogenes_L312_882094                       | Listeria_innocua_1642_v2 | 0.9086 |
| Listeria_monocytogenes_J1816_930781                      | Listeria_innocua_1642_v2 | 0.8895 |
| Listeria_monocytogenes_J1-220_930782                     | Listeria_innocua_1642_v2 | 0.8921 |
| Listeria_monocytogenes_J0161_393130                      | Listeria_innocua_1642_v2 | 0.8898 |
| Listeria_monocytogenes_HCC23_552536                      | Listeria_innocua_1642_v2 | 0.8894 |
| Listeria_monocytogenes_FSL_R2-561_393126                 | Listeria_innocua_1642_v2 | 0.8946 |
| Listeria_monocytogenes_FSL_J1-208_393119                 | Listeria_innocua_1642_v2 | 0.8988 |
| Listeria_monocytogenes_FSL_J1-175_393118                 | Listeria_innocua_1642_v2 | 0.8993 |
| Listeria_monocytogenes_Finland_1998_393127               | Listeria_innocua_1642_v2 | 0.9037 |
| Listeria_monocytogenes_EGD-e_169963_v1                   | Listeria_innocua_1642_v2 | 0.9036 |
| Listeria_monocytogenes_EGD-e_169963                      | Listeria_innocua_1642_v2 | 0.904  |
| Listeria_monocytogenes_EGD_1334565                       | Listeria_innocua_1642_v2 | 0.9022 |
| Listeria_monocytogenes_CFSAN002349_1299895               | Listeria_innocua_1642_v2 | 0.9036 |
| Listeria_monocytogenes_ATCC_19117_882095_v1              | Listeria_innocua_1642_v2 | 0.9041 |
| Listeria_monocytogenes_ATCC_19117_882095                 | Listeria_innocua_1642_v2 | 0.9038 |
| Listeria_monocytogenes_6179_1288295                      | Listeria_innocua_1642_v2 | 0.8884 |
| Listeria_monocytogenes_1639_v9                           | Listeria_innocua_1642_v2 | 0.8749 |
| Listeria_monocytogenes_1639_v99                          | Listeria_innocua_1642_v2 | 0.8995 |

[illegible]



[illegible]

|                                                          |                          |        |
|----------------------------------------------------------|--------------------------|--------|
| Listeria_monocytogenes_1639_v112                         | Listeria_innocua_1642_v2 | 0.8981 |
| Listeria_monocytogenes_1639_v111                         | Listeria_innocua_1642_v2 | 0.9049 |
| Listeria_monocytogenes_1639_v110                         | Listeria_innocua_1642_v2 | 0.894  |
| Listeria_monocytogenes_1639_v10                          | Listeria_innocua_1642_v2 | 0.8749 |
| Listeria_monocytogenes_1639_v109                         | Listeria_innocua_1642_v2 | 0.8955 |
| Listeria_monocytogenes_1639_v108                         | Listeria_innocua_1642_v2 | 0.898  |
| Listeria_monocytogenes_1639_v107                         | Listeria_innocua_1642_v2 | 0.9027 |
| Listeria_monocytogenes_1639_v106                         | Listeria_innocua_1642_v2 | 0.9031 |
| Listeria_monocytogenes_1639_v105                         | Listeria_innocua_1642_v2 | 0.9031 |
| Listeria_monocytogenes_1639_v104                         | Listeria_innocua_1642_v2 | 0.9031 |
| Listeria_monocytogenes_1639_v103                         | Listeria_innocua_1642_v2 | 0.9035 |
| Listeria_monocytogenes_1639_v102                         | Listeria_innocua_1642_v2 | 0.891  |
| Listeria_monocytogenes_1639_v101                         | Listeria_innocua_1642_v2 | 0.8868 |
| Listeria_monocytogenes_1639_v100                         | Listeria_innocua_1642_v2 | 0.8869 |
| Listeria_monocytogenes_1639                              | Listeria_innocua_1642_v2 | 0.9082 |
| Listeria_monocytogenes_104035_393133                     | Listeria_innocua_1642_v2 | 0.9006 |
| Listeria_monocytogenes_08-5923_637381                    | Listeria_innocua_1642_v2 | 0.883  |
| Listeria_monocytogenes_08-5578_653938                    | Listeria_innocua_1642_v2 | 0.8768 |
| Listeria_monocytogenes_07PF0776_1126011                  | Listeria_innocua_1642_v2 | 0.9034 |
| Listeria_marthii_FSL_S4-120_702457                       | Listeria_innocua_1642_v2 | 0.8494 |
| Listeria_marthii_529731_v1                               | Listeria_innocua_1642_v2 | 0.8845 |
| Listeria_marthii_529731                                  | Listeria_innocua_1642_v2 | 0.8908 |
| Listeria_ivanovii_WSLC3009_1457190                       | Listeria_innocua_1642_v2 | 0.8659 |
| Listeria_ivanovii_subsp_londoniensis_202752_v2           | Listeria_innocua_1642_v2 | 0.8639 |
| Listeria_ivanovii_subsp_londoniensis_202752_v1           | Listeria_innocua_1642_v2 | 0.8611 |
| Listeria_ivanovii_subsp_londoniensis_202752              | Listeria_innocua_1642_v2 | 0.8595 |
| Listeria_ivanovii_subsp_ivanovii_PAM_55_881621           | Listeria_innocua_1642_v2 | 0.8647 |
| Listeria_ivanovii_subsp_ivanovii_202751_v2               | Listeria_innocua_1642_v2 | 0.8662 |
| Listeria_ivanovii_subsp_ivanovii_202751_v1               | Listeria_innocua_1642_v2 | 0.8662 |
| Listeria_ivanovii_subsp_ivanovii_202751                  | Listeria_innocua_1642_v2 | 0.8662 |
| Listeria_ivanovii_FSL_F6-596_702454                      | Listeria_innocua_1642_v2 | 0.7988 |
| Listeria_ivanovii_1638                                   | Listeria_innocua_1642_v2 | 0.8662 |
| Listeria_innocua_FSL_S4-378_702456                       | Listeria_innocua_1642_v2 | 0.8344 |
| Listeria_innocua_FSL_J1-023_702455                       | Listeria_innocua_1642_v2 | 0.8723 |
| Listeria_innocua_Clip11262_272626                        | Listeria_innocua_1642_v2 | 0.903  |
| Listeria_innocua_1642_v4                                 | Listeria_innocua_1642_v2 | 0.9218 |
| Listeria_innocua_1642_v3                                 | Listeria_innocua_1642_v2 | 0.9786 |
| Listeria_innocua_1642_v2                                 | Listeria_innocua_1642_v2 | 0.0823 |
| Listeria_welshimeri_1643                                 | Listeria_innocua_1642_v3 | 0.8702 |
| Listeria_welshimeri_serovar_6b_str_SLCC5334_386043       | Listeria_innocua_1642_v3 | 0.8699 |
| Listeria_seeligeri_serovar_1_2b_str_SLCC3954_683837      | Listeria_innocua_1642_v3 | 0.86   |
| Listeria_seeligeri_FSL_S4-171_702452                     | Listeria_innocua_1642_v3 | 0.8101 |
| Listeria_seeligeri_FSL_N1-067_702453                     | Listeria_innocua_1642_v3 | 0.8122 |
| Listeria_seeligeri_1640_v1                               | Listeria_innocua_1642_v3 | 0.8658 |
| Listeria_seeligeri_1640                                  | Listeria_innocua_1642_v3 | 0.8658 |
| Listeria_monocytogenes_WSLC1042_1457188                  | Listeria_innocua_1642_v3 | 0.9024 |
| Listeria_monocytogenes_WSLC1001_1457187                  | Listeria_innocua_1642_v3 | 0.8946 |
| Listeria_monocytogenes_SLCC7179_879090                   | Listeria_innocua_1642_v3 | 0.9086 |
| Listeria_monocytogenes_SLCC5850_882096                   | Listeria_innocua_1642_v3 | 0.8978 |
| Listeria_monocytogenes_SLCC2755_932919                   | Listeria_innocua_1642_v3 | 0.9001 |
| Listeria_monocytogenes_SLCC2540_879089                   | Listeria_innocua_1642_v3 | 0.8975 |
| Listeria_monocytogenes_SLCC2479_882020                   | Listeria_innocua_1642_v3 | 0.8967 |
| Listeria_monocytogenes_SLCC2378_879088                   | Listeria_innocua_1642_v3 | 0.9034 |
| Listeria_monocytogenes_SLCC2376_882097                   | Listeria_innocua_1642_v3 | 0.9161 |
| Listeria_monocytogenes_SLCC2372_932920                   | Listeria_innocua_1642_v3 | 0.899  |
| Listeria_monocytogenes_serotype_4b_str_LL195_1230340     | Listeria_innocua_1642_v3 | 0.9069 |
| Listeria_monocytogenes_serotype_4b_str_LIS0087_1134669   | Listeria_innocua_1642_v3 | 0.8833 |
| Listeria_monocytogenes_serotype_4b_str_F2365_265669      | Listeria_innocua_1642_v3 | 0.9069 |
| Listeria_monocytogenes_serotype_4b_str_CLIP_80459_568819 | Listeria_innocua_1642_v3 | 0.9083 |
| Listeria_monocytogenes_serotype_4b_str_81-0861_1196161   | Listeria_innocua_1642_v3 | 0.9063 |
| Listeria_monocytogenes_serotype_4b_str_81-0592_1196160   | Listeria_innocua_1642_v3 | 0.9073 |
| Listeria_monocytogenes_serotype_4b_str_81-0558_1196159   | Listeria_innocua_1642_v3 | 0.908  |
| Listeria_monocytogenes_serotype_4b_str_10-0809_1196162   | Listeria_innocua_1642_v3 | 0.9077 |
| Listeria_monocytogenes_serotype_4b_str_02-6680_1196175   | Listeria_innocua_1642_v3 | 0.9096 |
| Listeria_monocytogenes_serotype_4b_str_02-6679_1196174   | Listeria_innocua_1642_v3 | 0.9096 |
| Listeria_monocytogenes_serotype_4b_str_02-1792_1196173   | Listeria_innocua_1642_v3 | 0.908  |
| Listeria_monocytogenes_serotype_4b_str_02-1289_1196172   | Listeria_innocua_1642_v3 | 0.908  |
| Listeria_monocytogenes_serotype_4b_str_02-1103_1196171   | Listeria_innocua_1642_v3 | 0.908  |
| Listeria_monocytogenes_serotype_3c_str_10-5027_1196195   | Listeria_innocua_1642_v3 | 0.8956 |
| Listeria_monocytogenes_serotype_1_2c_str_10-5026_1196194 | Listeria_innocua_1642_v3 | 0.8964 |
| Listeria_monocytogenes_serotype_1_2c_str_10-5025_1196193 | Listeria_innocua_1642_v3 | 0.8964 |
| Listeria_monocytogenes_serotype_1_2b_str_10-0811_1196164 | Listeria_innocua_1642_v3 | 0.8953 |
| Listeria_monocytogenes_serotype_1_2b_str_10-0810_1196163 | Listeria_innocua_1642_v3 | 0.8953 |
| Listeria_monocytogenes_serotype_1_2a_str_99-6370_1196179 | Listeria_innocua_1642_v3 | 0.8798 |
| Listeria_monocytogenes_serotype_1_2a_str_98-2035_1196178 | Listeria_innocua_1642_v3 | 0.8798 |
| Listeria_monocytogenes_serotype_1_2a_str_95-0093_1196177 | Listeria_innocua_1642_v3 | 0.8846 |
| Listeria_monocytogenes_serotype_1_2a_str_88-0478_1196176 | Listeria_innocua_1642_v3 | 0.8838 |
| Listeria_monocytogenes_serotype_1_2a_str_10-5024_1196192 | Listeria_innocua_1642_v3 | 0.8846 |
| Listeria_monocytogenes_serotype_1_2a_str_10-4758_1196168 | Listeria_innocua_1642_v3 | 0.8954 |
| Listeria_monocytogenes_serotype_1_2a_str_10-4754_1196167 | Listeria_innocua_1642_v3 | 0.8957 |
| Listeria_monocytogenes_serotype_1_2a_str_10-1321_1196191 | Listeria_innocua_1642_v3 | 0.8846 |
| Listeria_monocytogenes_serotype_1_2a_str_10-1047_1196190 | Listeria_innocua_1642_v3 | 0.8852 |
| Listeria_monocytogenes_serotype_1_2a_str_10-1046_1196189 | Listeria_innocua_1642_v3 | 0.8852 |
| Listeria_monocytogenes_serotype_1_2a_str_10-0934_1196170 | Listeria_innocua_1642_v3 | 0.9065 |
| Listeria_monocytogenes_serotype_1_2a_str_10-0933_1196169 | Listeria_innocua_1642_v3 | 0.9065 |
| Listeria_monocytogenes_serotype_1_2a_str_10-0815_1196188 | Listeria_innocua_1642_v3 | 0.8807 |
| Listeria_monocytogenes_serotype_1_2a_str_10-0814_1196187 | Listeria_innocua_1642_v3 | 0.8849 |
| Listeria_monocytogenes_serotype_1_2a_str_10-0813_1196166 | Listeria_innocua_1642_v3 | 0.9019 |
| Listeria_monocytogenes_serotype_1_2a_str_10-0812_1196165 | Listeria_innocua_1642_v3 | 0.9019 |
| Listeria_monocytogenes_serotype_1_2a_str_08-7669_1196186 | Listeria_innocua_1642_v3 | 0.8934 |
| Listeria_monocytogenes_serotype_1_2a_str_08-7374_1196185 | Listeria_innocua_1642_v3 | 0.8846 |

|                                                          |                          |        |
|----------------------------------------------------------|--------------------------|--------|
| Listeria_monocytogenes_serotype_1_2a_str_08-6997_1196184 | Listeria_innocua_1642_v3 | 0.8807 |
| Listeria_monocytogenes_serotype_1_2a_str_08-6569_1196183 | Listeria_innocua_1642_v3 | 0.8807 |
| Listeria_monocytogenes_serotype_1_2a_str_08-6056_1196182 | Listeria_innocua_1642_v3 | 0.8807 |
| Listeria_monocytogenes_serotype_1_2a_str_04-5457_1196181 | Listeria_innocua_1642_v3 | 0.8846 |
| Listeria_monocytogenes_serotype_1_2a_str_02-5993_1196180 | Listeria_innocua_1642_v3 | 0.8846 |
| Listeria_monocytogenes_R479a_1437838                     | Listeria_innocua_1642_v3 | 0.8872 |
| Listeria_monocytogenes_N53-1_1234142                     | Listeria_innocua_1642_v3 | 0.865  |
| Listeria_monocytogenes_M7_1030009                        | Listeria_innocua_1642_v3 | 0.8957 |
| Listeria_monocytogenes_LO28_393132                       | Listeria_innocua_1642_v3 | 0.9028 |
| Listeria_monocytogenes_L99_563174                        | Listeria_innocua_1642_v3 | 0.8961 |
| Listeria_monocytogenes_L312_882094                       | Listeria_innocua_1642_v3 | 0.9083 |
| Listeria_monocytogenes_J1816_930781                      | Listeria_innocua_1642_v3 | 0.8951 |
| Listeria_monocytogenes_J1-220_930782                     | Listeria_innocua_1642_v3 | 0.8999 |
| Listeria_monocytogenes_J0161_393130                      | Listeria_innocua_1642_v3 | 0.9013 |
| Listeria_monocytogenes_HCC23_552536                      | Listeria_innocua_1642_v3 | 0.8957 |
| Listeria_monocytogenes_FSL_R2-561_393126                 | Listeria_innocua_1642_v3 | 0.8943 |
| Listeria_monocytogenes_FSL_J1-208_393119                 | Listeria_innocua_1642_v3 | 0.8989 |
| Listeria_monocytogenes_FSL_J1-175_393118                 | Listeria_innocua_1642_v3 | 0.8971 |
| Listeria_monocytogenes_Finland_1998_393127               | Listeria_innocua_1642_v3 | 0.9042 |
| Listeria_monocytogenes_EGD-e_169963_v1                   | Listeria_innocua_1642_v3 | 0.9138 |
| Listeria_monocytogenes_EGD-e_169963                      | Listeria_innocua_1642_v3 | 0.9141 |
| Listeria_monocytogenes_EGD_1334565                       | Listeria_innocua_1642_v3 | 0.8985 |
| Listeria_monocytogenes_CFSAN002349_1299895               | Listeria_innocua_1642_v3 | 0.9037 |
| Listeria_monocytogenes_ATCC_19117_882095_v1              | Listeria_innocua_1642_v3 | 0.9046 |
| Listeria_monocytogenes_ATCC_19117_882095                 | Listeria_innocua_1642_v3 | 0.9042 |
| Listeria_monocytogenes_6179_1288295                      | Listeria_innocua_1642_v3 | 0.8969 |
| Listeria_monocytogenes_1639_v9                           | Listeria_innocua_1642_v3 | 0.8804 |
| Listeria_monocytogenes_1639_v99                          | Listeria_innocua_1642_v3 | 0.9048 |
| Listeria_monocytogenes_1639_v98                          | Listeria_innocua_1642_v3 | 0.8975 |
| Listeria_monocytogenes_1639_v97                          | Listeria_innocua_1642_v3 | 0.8988 |
| Listeria_monocytogenes_1639_v96                          | Listeria_innocua_1642_v3 | 0.9045 |
| Listeria_monocytogenes_1639_v95                          | Listeria_innocua_1642_v3 | 0.9045 |
| Listeria_monocytogenes_1639_v94                          | Listeria_innocua_1642_v3 | 0.9052 |
| Listeria_monocytogenes_1639_v93                          | Listeria_innocua_1642_v3 | 0.8904 |
| Listeria_monocytogenes_1639_v92                          | Listeria_innocua_1642_v3 | 0.9048 |
| Listeria_monocytogenes_1639_v91                          | Listeria_innocua_1642_v3 | 0.9031 |
| Listeria_monocytogenes_1639_v90                          | Listeria_innocua_1642_v3 | 0.8975 |
| Listeria_monocytogenes_1639_v8                           | Listeria_innocua_1642_v3 | 0.8812 |
| Listeria_monocytogenes_1639_v89                          | Listeria_innocua_1642_v3 | 0.9088 |
| Listeria_monocytogenes_1639_v88                          | Listeria_innocua_1642_v3 | 0.8935 |
| Listeria_monocytogenes_1639_v87                          | Listeria_innocua_1642_v3 | 0.8973 |
| Listeria_monocytogenes_1639_v86                          | Listeria_innocua_1642_v3 | 0.8969 |
| Listeria_monocytogenes_1639_v85                          | Listeria_innocua_1642_v3 | 0.9064 |
| Listeria_monocytogenes_1639_v84                          | Listeria_innocua_1642_v3 | 0.8948 |
| Listeria_monocytogenes_1639_v83                          | Listeria_innocua_1642_v3 | 0.9061 |
| Listeria_monocytogenes_1639_v82                          | Listeria_innocua_1642_v3 | 0.9054 |
| Listeria_monocytogenes_1639_v81                          | Listeria_innocua_1642_v3 | 0.892  |
| Listeria_monocytogenes_1639_v80                          | Listeria_innocua_1642_v3 | 0.8977 |
| Listeria_monocytogenes_1639_v7                           | Listeria_innocua_1642_v3 | 0.8812 |
| Listeria_monocytogenes_1639_v79                          | Listeria_innocua_1642_v3 | 0.89   |
| Listeria_monocytogenes_1639_v78                          | Listeria_innocua_1642_v3 | 0.8917 |
| Listeria_monocytogenes_1639_v77                          | Listeria_innocua_1642_v3 | 0.898  |
| Listeria_monocytogenes_1639_v76                          | Listeria_innocua_1642_v3 | 0.8844 |
| Listeria_monocytogenes_1639_v75                          | Listeria_innocua_1642_v3 | 0.8961 |
| Listeria_monocytogenes_1639_v74                          | Listeria_innocua_1642_v3 | 0.8999 |
| Listeria_monocytogenes_1639_v73                          | Listeria_innocua_1642_v3 | 0.9044 |
| Listeria_monocytogenes_1639_v72                          | Listeria_innocua_1642_v3 | 0.9045 |
| Listeria_monocytogenes_1639_v71                          | Listeria_innocua_1642_v3 | 0.8852 |
| Listeria_monocytogenes_1639_v70                          | Listeria_innocua_1642_v3 | 0.8975 |
| Listeria_monocytogenes_1639_v6                           | Listeria_innocua_1642_v3 | 0.8809 |
| Listeria_monocytogenes_1639_v69                          | Listeria_innocua_1642_v3 | 0.9073 |
| Listeria_monocytogenes_1639_v68                          | Listeria_innocua_1642_v3 | 0.9035 |
| Listeria_monocytogenes_1639_v67                          | Listeria_innocua_1642_v3 | 0.8931 |
| Listeria_monocytogenes_1639_v66                          | Listeria_innocua_1642_v3 | 0.8951 |
| Listeria_monocytogenes_1639_v65                          | Listeria_innocua_1642_v3 | 0.8923 |
| Listeria_monocytogenes_1639_v64                          | Listeria_innocua_1642_v3 | 0.8918 |
| Listeria_monocytogenes_1639_v63                          | Listeria_innocua_1642_v3 | 0.8996 |
| Listeria_monocytogenes_1639_v62                          | Listeria_innocua_1642_v3 | 0.8884 |
| Listeria_monocytogenes_1639_v61                          | Listeria_innocua_1642_v3 | 0.8868 |
| Listeria_monocytogenes_1639_v60                          | Listeria_innocua_1642_v3 | 0.8961 |
| Listeria_monocytogenes_1639_v5                           | Listeria_innocua_1642_v3 | 0.8747 |
| Listeria_monocytogenes_1639_v59                          | Listeria_innocua_1642_v3 | 0.8975 |
| Listeria_monocytogenes_1639_v58                          | Listeria_innocua_1642_v3 | 0.9086 |
| Listeria_monocytogenes_1639_v57                          | Listeria_innocua_1642_v3 | 0.892  |
| Listeria_monocytogenes_1639_v56                          | Listeria_innocua_1642_v3 | 0.9027 |
| Listeria_monocytogenes_1639_v55                          | Listeria_innocua_1642_v3 | 0.9041 |
| Listeria_monocytogenes_1639_v54                          | Listeria_innocua_1642_v3 | 0.8998 |
| Listeria_monocytogenes_1639_v53                          | Listeria_innocua_1642_v3 | 0.8938 |
| Listeria_monocytogenes_1639_v52                          | Listeria_innocua_1642_v3 | 0.9026 |
| Listeria_monocytogenes_1639_v51                          | Listeria_innocua_1642_v3 | 0.9081 |
| Listeria_monocytogenes_1639_v50                          | Listeria_innocua_1642_v3 | 0.8838 |
| Listeria_monocytogenes_1639_v4                           | Listeria_innocua_1642_v3 | 0.8836 |
| Listeria_monocytogenes_1639_v49                          | Listeria_innocua_1642_v3 | 0.9007 |
| Listeria_monocytogenes_1639_v48                          | Listeria_innocua_1642_v3 | 0.8922 |
| Listeria_monocytogenes_1639_v47                          | Listeria_innocua_1642_v3 | 0.8846 |
| Listeria_monocytogenes_1639_v46                          | Listeria_innocua_1642_v3 | 0.8969 |
| Listeria_monocytogenes_1639_v45                          | Listeria_innocua_1642_v3 | 0.8814 |
| Listeria_monocytogenes_1639_v44                          | Listeria_innocua_1642_v3 | 0.8846 |
| Listeria_monocytogenes_1639_v43                          | Listeria_innocua_1642_v3 | 0.8846 |
| Listeria_monocytogenes_1639_v42                          | Listeria_innocua_1642_v3 | 0.8856 |
| Listeria_monocytogenes_1639_v41                          | Listeria_innocua_1642_v3 | 0.8854 |

[illegible]

|                                                          |                          |        |
|----------------------------------------------------------|--------------------------|--------|
| Listeria_monocytogenes_1639_v138                         | Listeria_innocua_1642_v3 | 0.9102 |
| Listeria_monocytogenes_1639_v137                         | Listeria_innocua_1642_v3 | 0.9098 |
| Listeria_monocytogenes_1639_v136                         | Listeria_innocua_1642_v3 | 0.895  |
| Listeria_monocytogenes_1639_v135                         | Listeria_innocua_1642_v3 | 0.9084 |
| Listeria_monocytogenes_1639_v134                         | Listeria_innocua_1642_v3 | 0.9031 |
| Listeria_monocytogenes_1639_v133                         | Listeria_innocua_1642_v3 | 0.8988 |
| Listeria_monocytogenes_1639_v132                         | Listeria_innocua_1642_v3 | 0.9023 |
| Listeria_monocytogenes_1639_v131                         | Listeria_innocua_1642_v3 | 0.9053 |
| Listeria_monocytogenes_1639_v130                         | Listeria_innocua_1642_v3 | 0.9031 |
| Listeria_monocytogenes_1639_v12                          | Listeria_innocua_1642_v3 | 0.8874 |
| Listeria_monocytogenes_1639_v129                         | Listeria_innocua_1642_v3 | 0.9075 |
| Listeria_monocytogenes_1639_v128                         | Listeria_innocua_1642_v3 | 0.9052 |
| Listeria_monocytogenes_1639_v127                         | Listeria_innocua_1642_v3 | 0.9093 |
| Listeria_monocytogenes_1639_v126                         | Listeria_innocua_1642_v3 | 0.9033 |
| Listeria_monocytogenes_1639_v125                         | Listeria_innocua_1642_v3 | 0.9014 |
| Listeria_monocytogenes_1639_v124                         | Listeria_innocua_1642_v3 | 0.9101 |
| Listeria_monocytogenes_1639_v123                         | Listeria_innocua_1642_v3 | 0.9037 |
| Listeria_monocytogenes_1639_v122                         | Listeria_innocua_1642_v3 | 0.9037 |
| Listeria_monocytogenes_1639_v121                         | Listeria_innocua_1642_v3 | 0.9037 |
| Listeria_monocytogenes_1639_v120                         | Listeria_innocua_1642_v3 | 0.9037 |
| Listeria_monocytogenes_1639_v11                          | Listeria_innocua_1642_v3 | 0.893  |
| Listeria_monocytogenes_1639_v119                         | Listeria_innocua_1642_v3 | 0.9037 |
| Listeria_monocytogenes_1639_v118                         | Listeria_innocua_1642_v3 | 0.9037 |
| Listeria_monocytogenes_1639_v117                         | Listeria_innocua_1642_v3 | 0.8954 |
| Listeria_monocytogenes_1639_v116                         | Listeria_innocua_1642_v3 | 0.903  |
| Listeria_monocytogenes_1639_v115                         | Listeria_innocua_1642_v3 | 0.9034 |
| Listeria_monocytogenes_1639_v114                         | Listeria_innocua_1642_v3 | 0.8955 |
| Listeria_monocytogenes_1639_v113                         | Listeria_innocua_1642_v3 | 0.8977 |
| Listeria_monocytogenes_1639_v112                         | Listeria_innocua_1642_v3 | 0.9045 |
| Listeria_monocytogenes_1639_v111                         | Listeria_innocua_1642_v3 | 0.9042 |
| Listeria_monocytogenes_1639_v110                         | Listeria_innocua_1642_v3 | 0.9008 |
| Listeria_monocytogenes_1639_v10                          | Listeria_innocua_1642_v3 | 0.8746 |
| Listeria_monocytogenes_1639_v109                         | Listeria_innocua_1642_v3 | 0.8959 |
| Listeria_monocytogenes_1639_v108                         | Listeria_innocua_1642_v3 | 0.9062 |
| Listeria_monocytogenes_1639_v107                         | Listeria_innocua_1642_v3 | 0.9032 |
| Listeria_monocytogenes_1639_v106                         | Listeria_innocua_1642_v3 | 0.9036 |
| Listeria_monocytogenes_1639_v105                         | Listeria_innocua_1642_v3 | 0.9036 |
| Listeria_monocytogenes_1639_v104                         | Listeria_innocua_1642_v3 | 0.9036 |
| Listeria_monocytogenes_1639_v103                         | Listeria_innocua_1642_v3 | 0.9039 |
| Listeria_monocytogenes_1639_v102                         | Listeria_innocua_1642_v3 | 0.8914 |
| Listeria_monocytogenes_1639_v101                         | Listeria_innocua_1642_v3 | 0.8869 |
| Listeria_monocytogenes_1639_v100                         | Listeria_innocua_1642_v3 | 0.8866 |
| Listeria_monocytogenes_1639                              | Listeria_innocua_1642_v3 | 0.9082 |
| Listeria_monocytogenes_10403S_393133                     | Listeria_innocua_1642_v3 | 0.9108 |
| Listeria_monocytogenes_08-5923_637381                    | Listeria_innocua_1642_v3 | 0.8846 |
| Listeria_monocytogenes_08-5578_653938                    | Listeria_innocua_1642_v3 | 0.8772 |
| Listeria_monocytogenes_07PF0776_1126011                  | Listeria_innocua_1642_v3 | 0.9035 |
| Listeria_marthii_FSL_S4-120_702457                       | Listeria_innocua_1642_v3 | 0.8488 |
| Listeria_marthii_529731_v1                               | Listeria_innocua_1642_v3 | 0.8951 |
| Listeria_marthii_529731                                  | Listeria_innocua_1642_v3 | 0.8901 |
| Listeria_ivanovii_WSLC3009_1457190                       | Listeria_innocua_1642_v3 | 0.8649 |
| Listeria_ivanovii_subsp_londoniensis_202752_v2           | Listeria_innocua_1642_v3 | 0.864  |
| Listeria_ivanovii_subsp_londoniensis_202752_v1           | Listeria_innocua_1642_v3 | 0.8515 |
| Listeria_ivanovii_subsp_londoniensis_202752              | Listeria_innocua_1642_v3 | 0.8596 |
| Listeria_ivanovii_subsp_ivanovii_PAM_55_881621           | Listeria_innocua_1642_v3 | 0.8636 |
| Listeria_ivanovii_subsp_ivanovii_202751_v2               | Listeria_innocua_1642_v3 | 0.8652 |
| Listeria_ivanovii_subsp_ivanovii_202751_v1               | Listeria_innocua_1642_v3 | 0.8652 |
| Listeria_ivanovii_subsp_ivanovii_202751                  | Listeria_innocua_1642_v3 | 0.8652 |
| Listeria_ivanovii_FSL_F6-596_702454                      | Listeria_innocua_1642_v3 | 0.7993 |
| Listeria_ivanovii_1638                                   | Listeria_innocua_1642_v3 | 0.8652 |
| Listeria_innocua_FSL_S4-378_702456                       | Listeria_innocua_1642_v3 | 0.8383 |
| Listeria_innocua_FSL_J1-023_702455                       | Listeria_innocua_1642_v3 | 0.8717 |
| Listeria_innocua_Clip11262_272626                        | Listeria_innocua_1642_v3 | 0.9078 |
| Listeria_innocua_1642_v4                                 | Listeria_innocua_1642_v3 | 0.9161 |
| Listeria_innocua_1642_v3                                 | Listeria_innocua_1642_v3 | 0.0847 |
| Listeria_welshimeri_1643                                 | Listeria_innocua_1642_v4 | 0.8589 |
| Listeria_welshimeri_serovar_6b_str_SLCC5334_386043       | Listeria_innocua_1642_v4 | 0.8583 |
| Listeria_seeligeri_serovar_1_2b_str_SLCC3954_683837      | Listeria_innocua_1642_v4 | 0.8451 |
| Listeria_seeligeri_FSL_S4-171_702452                     | Listeria_innocua_1642_v4 | 0.7947 |
| Listeria_seeligeri_FSL_N1-067_702453                     | Listeria_innocua_1642_v4 | 0.808  |
| Listeria_seeligeri_1640_v1                               | Listeria_innocua_1642_v4 | 0.8558 |
| Listeria_seeligeri_1640                                  | Listeria_innocua_1642_v4 | 0.8638 |
| Listeria_monocytogenes_WSLC1042_1457188                  | Listeria_innocua_1642_v4 | 0.8858 |
| Listeria_monocytogenes_WSLC1001_1457187                  | Listeria_innocua_1642_v4 | 0.8884 |
| Listeria_monocytogenes_SLCC7179_879090                   | Listeria_innocua_1642_v4 | 0.8908 |
| Listeria_monocytogenes_SLCC5850_882096                   | Listeria_innocua_1642_v4 | 0.892  |
| Listeria_monocytogenes_SLCC2755_932919                   | Listeria_innocua_1642_v4 | 0.8947 |
| Listeria_monocytogenes_SLCC2540_879089                   | Listeria_innocua_1642_v4 | 0.8851 |
| Listeria_monocytogenes_SLCC2479_882020                   | Listeria_innocua_1642_v4 | 0.8878 |
| Listeria_monocytogenes_SLCC2378_879088                   | Listeria_innocua_1642_v4 | 0.8871 |
| Listeria_monocytogenes_SLCC2376_882097                   | Listeria_innocua_1642_v4 | 0.8972 |
| Listeria_monocytogenes_SLCC2372_932920                   | Listeria_innocua_1642_v4 | 0.8958 |
| Listeria_monocytogenes_serotype_4b_str_LL195_1230340     | Listeria_innocua_1642_v4 | 0.8905 |
| Listeria_monocytogenes_serotype_4b_str_LIS0087_1134669   | Listeria_innocua_1642_v4 | 0.8688 |
| Listeria_monocytogenes_serotype_4b_str_F2365_265669      | Listeria_innocua_1642_v4 | 0.8905 |
| Listeria_monocytogenes_serotype_4b_str_CLIP_80459_568819 | Listeria_innocua_1642_v4 | 0.8937 |
| Listeria_monocytogenes_serotype_4b_str_81-0861_1196161   | Listeria_innocua_1642_v4 | 0.8833 |
| Listeria_monocytogenes_serotype_4b_str_81-0592_1196160   | Listeria_innocua_1642_v4 | 0.8843 |
| Listeria_monocytogenes_serotype_4b_str_81-0558_1196159   | Listeria_innocua_1642_v4 | 0.8853 |
| Listeria_monocytogenes_serotype_4b_str_10-0809_1196162   | Listeria_innocua_1642_v4 | 0.8846 |
| Listeria_monocytogenes_serotype_4b_str_02-6680_1196175   | Listeria_innocua_1642_v4 | 0.8939 |

|                                                          |                          |        |
|----------------------------------------------------------|--------------------------|--------|
| Listeria_monocytogenes_serotype_4b_str_02-6679_1196174   | Listeria_innocua_1642_v4 | 0.8939 |
| Listeria_monocytogenes_serotype_4b_str_02-1792_1196173   | Listeria_innocua_1642_v4 | 0.885  |
| Listeria_monocytogenes_serotype_4b_str_02-1289_1196172   | Listeria_innocua_1642_v4 | 0.885  |
| Listeria_monocytogenes_serotype_4b_str_02-1103_1196171   | Listeria_innocua_1642_v4 | 0.885  |
| Listeria_monocytogenes_serotype_3c_str_10-5027_1196195   | Listeria_innocua_1642_v4 | 0.8874 |
| Listeria_monocytogenes_serotype_1_2c_str_10-5026_1196194 | Listeria_innocua_1642_v4 | 0.8884 |
| Listeria_monocytogenes_serotype_1_2c_str_10-5025_1196193 | Listeria_innocua_1642_v4 | 0.8884 |
| Listeria_monocytogenes_serotype_1_2b_str_10-0811_1196164 | Listeria_innocua_1642_v4 | 0.8813 |
| Listeria_monocytogenes_serotype_1_2b_str_10-0810_1196163 | Listeria_innocua_1642_v4 | 0.8813 |
| Listeria_monocytogenes_serotype_1_2a_str_99-6370_1196179 | Listeria_innocua_1642_v4 | 0.8759 |
| Listeria_monocytogenes_serotype_1_2a_str_98-2035_1196178 | Listeria_innocua_1642_v4 | 0.8759 |
| Listeria_monocytogenes_serotype_1_2a_str_95-0093_1196177 | Listeria_innocua_1642_v4 | 0.8777 |
| Listeria_monocytogenes_serotype_1_2a_str_88-0478_1196176 | Listeria_innocua_1642_v4 | 0.8772 |
| Listeria_monocytogenes_serotype_1_2a_str_10-5024_1196192 | Listeria_innocua_1642_v4 | 0.878  |
| Listeria_monocytogenes_serotype_1_2a_str_10-4758_1196168 | Listeria_innocua_1642_v4 | 0.8877 |
| Listeria_monocytogenes_serotype_1_2a_str_10-4754_1196167 | Listeria_innocua_1642_v4 | 0.8877 |
| Listeria_monocytogenes_serotype_1_2a_str_10-1321_1196191 | Listeria_innocua_1642_v4 | 0.878  |
| Listeria_monocytogenes_serotype_1_2a_str_10-1047_1196190 | Listeria_innocua_1642_v4 | 0.8779 |
| Listeria_monocytogenes_serotype_1_2a_str_10-1046_1196189 | Listeria_innocua_1642_v4 | 0.8779 |
| Listeria_monocytogenes_serotype_1_2a_str_10-0934_1196170 | Listeria_innocua_1642_v4 | 0.8923 |
| Listeria_monocytogenes_serotype_1_2a_str_10-0933_1196169 | Listeria_innocua_1642_v4 | 0.8923 |
| Listeria_monocytogenes_serotype_1_2a_str_10-0815_1196188 | Listeria_innocua_1642_v4 | 0.8757 |
| Listeria_monocytogenes_serotype_1_2a_str_10-0814_1196187 | Listeria_innocua_1642_v4 | 0.878  |
| Listeria_monocytogenes_serotype_1_2a_str_10-0813_1196166 | Listeria_innocua_1642_v4 | 0.8866 |
| Listeria_monocytogenes_serotype_1_2a_str_10-0812_1196165 | Listeria_innocua_1642_v4 | 0.8866 |
| Listeria_monocytogenes_serotype_1_2a_str_08-7669_1196186 | Listeria_innocua_1642_v4 | 0.8815 |
| Listeria_monocytogenes_serotype_1_2a_str_08-7374_1196185 | Listeria_innocua_1642_v4 | 0.878  |
| Listeria_monocytogenes_serotype_1_2a_str_08-6997_1196184 | Listeria_innocua_1642_v4 | 0.8757 |
| Listeria_monocytogenes_serotype_1_2a_str_08-6569_1196183 | Listeria_innocua_1642_v4 | 0.8757 |
| Listeria_monocytogenes_serotype_1_2a_str_08-6056_1196182 | Listeria_innocua_1642_v4 | 0.8757 |
| Listeria_monocytogenes_serotype_1_2a_str_04-5457_1196181 | Listeria_innocua_1642_v4 | 0.878  |
| Listeria_monocytogenes_serotype_1_2a_str_02-5993_1196180 | Listeria_innocua_1642_v4 | 0.8777 |
| Listeria_monocytogenes_R479a_1437838                     | Listeria_innocua_1642_v4 | 0.8853 |
| Listeria_monocytogenes_N53-1_1234142                     | Listeria_innocua_1642_v4 | 0.8483 |
| Listeria_monocytogenes_M7_1030009                        | Listeria_innocua_1642_v4 | 0.8742 |
| Listeria_monocytogenes_LO28_393132                       | Listeria_innocua_1642_v4 | 0.8861 |
| Listeria_monocytogenes_L99_563174                        | Listeria_innocua_1642_v4 | 0.8749 |
| Listeria_monocytogenes_L312_882094                       | Listeria_innocua_1642_v4 | 0.8937 |
| Listeria_monocytogenes_J1816_930781                      | Listeria_innocua_1642_v4 | 0.8789 |
| Listeria_monocytogenes_J1-220_930782                     | Listeria_innocua_1642_v4 | 0.8841 |
| Listeria_monocytogenes_J0161_393130                      | Listeria_innocua_1642_v4 | 0.8813 |
| Listeria_monocytogenes_HCC23_552536                      | Listeria_innocua_1642_v4 | 0.8745 |
| Listeria_monocytogenes_FSL_R2-561_393126                 | Listeria_innocua_1642_v4 | 0.8868 |
| Listeria_monocytogenes_FSL_J1-208_393119                 | Listeria_innocua_1642_v4 | 0.8853 |
| Listeria_monocytogenes_FSL_J1-175_393118                 | Listeria_innocua_1642_v4 | 0.8873 |
| Listeria_monocytogenes_Finland_1998_393127               | Listeria_innocua_1642_v4 | 0.8907 |
| Listeria_monocytogenes_EGD-e_169963_v1                   | Listeria_innocua_1642_v4 | 0.8879 |
| Listeria_monocytogenes_EGD-e_169963                      | Listeria_innocua_1642_v4 | 0.8883 |
| Listeria_monocytogenes_EGD_1334565                       | Listeria_innocua_1642_v4 | 0.8927 |
| Listeria_monocytogenes_CFSAN002349_1299895               | Listeria_innocua_1642_v4 | 0.8882 |
| Listeria_monocytogenes_ATCC_19117_882095_v1              | Listeria_innocua_1642_v4 | 0.8883 |
| Listeria_monocytogenes_ATCC_19117_882095                 | Listeria_innocua_1642_v4 | 0.8883 |
| Listeria_monocytogenes_6179_1288295                      | Listeria_innocua_1642_v4 | 0.8858 |
| Listeria_monocytogenes_1639_v9                           | Listeria_innocua_1642_v4 | 0.8876 |
| Listeria_monocytogenes_1639_v99                          | Listeria_innocua_1642_v4 | 0.8891 |
| Listeria_monocytogenes_1639_v98                          | Listeria_innocua_1642_v4 | 0.8827 |
| Listeria_monocytogenes_1639_v97                          | Listeria_innocua_1642_v4 | 0.8846 |
| Listeria_monocytogenes_1639_v96                          | Listeria_innocua_1642_v4 | 0.8877 |
| Listeria_monocytogenes_1639_v95                          | Listeria_innocua_1642_v4 | 0.8878 |
| Listeria_monocytogenes_1639_v94                          | Listeria_innocua_1642_v4 | 0.8881 |
| Listeria_monocytogenes_1639_v93                          | Listeria_innocua_1642_v4 | 0.8834 |
| Listeria_monocytogenes_1639_v92                          | Listeria_innocua_1642_v4 | 0.8902 |
| Listeria_monocytogenes_1639_v91                          | Listeria_innocua_1642_v4 | 0.8871 |
| Listeria_monocytogenes_1639_v90                          | Listeria_innocua_1642_v4 | 0.8827 |
| Listeria_monocytogenes_1639_v8                           | Listeria_innocua_1642_v4 | 0.8844 |
| Listeria_monocytogenes_1639_v89                          | Listeria_innocua_1642_v4 | 0.89   |
| Listeria_monocytogenes_1639_v88                          | Listeria_innocua_1642_v4 | 0.8835 |
| Listeria_monocytogenes_1639_v87                          | Listeria_innocua_1642_v4 | 0.8853 |
| Listeria_monocytogenes_1639_v86                          | Listeria_innocua_1642_v4 | 0.885  |
| Listeria_monocytogenes_1639_v85                          | Listeria_innocua_1642_v4 | 0.8838 |
| Listeria_monocytogenes_1639_v84                          | Listeria_innocua_1642_v4 | 0.8843 |
| Listeria_monocytogenes_1639_v83                          | Listeria_innocua_1642_v4 | 0.8837 |
| Listeria_monocytogenes_1639_v82                          | Listeria_innocua_1642_v4 | 0.8831 |
| Listeria_monocytogenes_1639_v81                          | Listeria_innocua_1642_v4 | 0.8842 |
| Listeria_monocytogenes_1639_v80                          | Listeria_innocua_1642_v4 | 0.8843 |
| Listeria_monocytogenes_1639_v7                           | Listeria_innocua_1642_v4 | 0.8844 |
| Listeria_monocytogenes_1639_v79                          | Listeria_innocua_1642_v4 | 0.8815 |
| Listeria_monocytogenes_1639_v78                          | Listeria_innocua_1642_v4 | 0.8835 |
| Listeria_monocytogenes_1639_v77                          | Listeria_innocua_1642_v4 | 0.882  |
| Listeria_monocytogenes_1639_v76                          | Listeria_innocua_1642_v4 | 0.8793 |
| Listeria_monocytogenes_1639_v75                          | Listeria_innocua_1642_v4 | 0.8749 |
| Listeria_monocytogenes_1639_v74                          | Listeria_innocua_1642_v4 | 0.8857 |
| Listeria_monocytogenes_1639_v73                          | Listeria_innocua_1642_v4 | 0.8957 |
| Listeria_monocytogenes_1639_v72                          | Listeria_innocua_1642_v4 | 0.884  |
| Listeria_monocytogenes_1639_v71                          | Listeria_innocua_1642_v4 | 0.8758 |
| Listeria_monocytogenes_1639_v70                          | Listeria_innocua_1642_v4 | 0.8914 |
| Listeria_monocytogenes_1639_v6                           | Listeria_innocua_1642_v4 | 0.8838 |
| Listeria_monocytogenes_1639_v69                          | Listeria_innocua_1642_v4 | 0.8846 |
| Listeria_monocytogenes_1639_v68                          | Listeria_innocua_1642_v4 | 0.883  |
| Listeria_monocytogenes_1639_v67                          | Listeria_innocua_1642_v4 | 0.8838 |
| Listeria_monocytogenes_1639_v66                          | Listeria_innocua_1642_v4 | 0.8868 |



[illegible]

|                                                |                          |        |
|------------------------------------------------|--------------------------|--------|
| Listeria_monocytogenes_1639_v162               | Listeria_innocua_1642_v4 | 0.8896 |
| Listeria_monocytogenes_1639_v161               | Listeria_innocua_1642_v4 | 0.8908 |
| Listeria_monocytogenes_1639_v160               | Listeria_innocua_1642_v4 | 0.8908 |
| Listeria_monocytogenes_1639_v15                | Listeria_innocua_1642_v4 | 0.9    |
| Listeria_monocytogenes_1639_v159               | Listeria_innocua_1642_v4 | 0.8896 |
| Listeria_monocytogenes_1639_v158               | Listeria_innocua_1642_v4 | 0.8905 |
| Listeria_monocytogenes_1639_v157               | Listeria_innocua_1642_v4 | 0.8905 |
| Listeria_monocytogenes_1639_v156               | Listeria_innocua_1642_v4 | 0.8855 |
| Listeria_monocytogenes_1639_v155               | Listeria_innocua_1642_v4 | 0.8884 |
| Listeria_monocytogenes_1639_v154               | Listeria_innocua_1642_v4 | 0.8877 |
| Listeria_monocytogenes_1639_v153               | Listeria_innocua_1642_v4 | 0.8884 |
| Listeria_monocytogenes_1639_v152               | Listeria_innocua_1642_v4 | 0.8899 |
| Listeria_monocytogenes_1639_v151               | Listeria_innocua_1642_v4 | 0.8899 |
| Listeria_monocytogenes_1639_v150               | Listeria_innocua_1642_v4 | 0.8913 |
| Listeria_monocytogenes_1639_v14                | Listeria_innocua_1642_v4 | 0.8763 |
| Listeria_monocytogenes_1639_v149               | Listeria_innocua_1642_v4 | 0.8927 |
| Listeria_monocytogenes_1639_v148               | Listeria_innocua_1642_v4 | 0.8886 |
| Listeria_monocytogenes_1639_v147               | Listeria_innocua_1642_v4 | 0.8836 |
| Listeria_monocytogenes_1639_v146               | Listeria_innocua_1642_v4 | 0.892  |
| Listeria_monocytogenes_1639_v145               | Listeria_innocua_1642_v4 | 0.8893 |
| Listeria_monocytogenes_1639_v144               | Listeria_innocua_1642_v4 | 0.893  |
| Listeria_monocytogenes_1639_v143               | Listeria_innocua_1642_v4 | 0.8925 |
| Listeria_monocytogenes_1639_v142               | Listeria_innocua_1642_v4 | 0.8934 |
| Listeria_monocytogenes_1639_v141               | Listeria_innocua_1642_v4 | 0.888  |
| Listeria_monocytogenes_1639_v140               | Listeria_innocua_1642_v4 | 0.8937 |
| Listeria_monocytogenes_1639_v13                | Listeria_innocua_1642_v4 | 0.9003 |
| Listeria_monocytogenes_1639_v139               | Listeria_innocua_1642_v4 | 0.8905 |
| Listeria_monocytogenes_1639_v138               | Listeria_innocua_1642_v4 | 0.8949 |
| Listeria_monocytogenes_1639_v137               | Listeria_innocua_1642_v4 | 0.8945 |
| Listeria_monocytogenes_1639_v136               | Listeria_innocua_1642_v4 | 0.8871 |
| Listeria_monocytogenes_1639_v135               | Listeria_innocua_1642_v4 | 0.8795 |
| Listeria_monocytogenes_1639_v134               | Listeria_innocua_1642_v4 | 0.8868 |
| Listeria_monocytogenes_1639_v133               | Listeria_innocua_1642_v4 | 0.8896 |
| Listeria_monocytogenes_1639_v132               | Listeria_innocua_1642_v4 | 0.8953 |
| Listeria_monocytogenes_1639_v131               | Listeria_innocua_1642_v4 | 0.8866 |
| Listeria_monocytogenes_1639_v130               | Listeria_innocua_1642_v4 | 0.8997 |
| Listeria_monocytogenes_1639_v12                | Listeria_innocua_1642_v4 | 0.8884 |
| Listeria_monocytogenes_1639_v129               | Listeria_innocua_1642_v4 | 0.8893 |
| Listeria_monocytogenes_1639_v128               | Listeria_innocua_1642_v4 | 0.8848 |
| Listeria_monocytogenes_1639_v127               | Listeria_innocua_1642_v4 | 0.8846 |
| Listeria_monocytogenes_1639_v126               | Listeria_innocua_1642_v4 | 0.8837 |
| Listeria_monocytogenes_1639_v125               | Listeria_innocua_1642_v4 | 0.8826 |
| Listeria_monocytogenes_1639_v124               | Listeria_innocua_1642_v4 | 0.8897 |
| Listeria_monocytogenes_1639_v123               | Listeria_innocua_1642_v4 | 0.8882 |
| Listeria_monocytogenes_1639_v122               | Listeria_innocua_1642_v4 | 0.8885 |
| Listeria_monocytogenes_1639_v121               | Listeria_innocua_1642_v4 | 0.8885 |
| Listeria_monocytogenes_1639_v120               | Listeria_innocua_1642_v4 | 0.8882 |
| Listeria_monocytogenes_1639_v11                | Listeria_innocua_1642_v4 | 0.8832 |
| Listeria_monocytogenes_1639_v119               | Listeria_innocua_1642_v4 | 0.8885 |
| Listeria_monocytogenes_1639_v118               | Listeria_innocua_1642_v4 | 0.8885 |
| Listeria_monocytogenes_1639_v117               | Listeria_innocua_1642_v4 | 0.8838 |
| Listeria_monocytogenes_1639_v116               | Listeria_innocua_1642_v4 | 0.8865 |
| Listeria_monocytogenes_1639_v115               | Listeria_innocua_1642_v4 | 0.8868 |
| Listeria_monocytogenes_1639_v114               | Listeria_innocua_1642_v4 | 0.885  |
| Listeria_monocytogenes_1639_v113               | Listeria_innocua_1642_v4 | 0.8904 |
| Listeria_monocytogenes_1639_v112               | Listeria_innocua_1642_v4 | 0.8858 |
| Listeria_monocytogenes_1639_v111               | Listeria_innocua_1642_v4 | 0.8983 |
| Listeria_monocytogenes_1639_v110               | Listeria_innocua_1642_v4 | 0.8869 |
| Listeria_monocytogenes_1639_v10                | Listeria_innocua_1642_v4 | 0.8862 |
| Listeria_monocytogenes_1639_v109               | Listeria_innocua_1642_v4 | 0.8865 |
| Listeria_monocytogenes_1639_v108               | Listeria_innocua_1642_v4 | 0.8876 |
| Listeria_monocytogenes_1639_v107               | Listeria_innocua_1642_v4 | 0.887  |
| Listeria_monocytogenes_1639_v106               | Listeria_innocua_1642_v4 | 0.8873 |
| Listeria_monocytogenes_1639_v105               | Listeria_innocua_1642_v4 | 0.8873 |
| Listeria_monocytogenes_1639_v104               | Listeria_innocua_1642_v4 | 0.8877 |
| Listeria_monocytogenes_1639_v103               | Listeria_innocua_1642_v4 | 0.8877 |
| Listeria_monocytogenes_1639_v102               | Listeria_innocua_1642_v4 | 0.885  |
| Listeria_monocytogenes_1639_v101               | Listeria_innocua_1642_v4 | 0.8868 |
| Listeria_monocytogenes_1639_v100               | Listeria_innocua_1642_v4 | 0.8847 |
| Listeria_monocytogenes_1639                    | Listeria_innocua_1642_v4 | 0.8947 |
| Listeria_monocytogenes_10403S_393133           | Listeria_innocua_1642_v4 | 0.8915 |
| Listeria_monocytogenes_08-5923_637381          | Listeria_innocua_1642_v4 | 0.878  |
| Listeria_monocytogenes_08-5578_653938          | Listeria_innocua_1642_v4 | 0.877  |
| Listeria_monocytogenes_07PF0776_1126011        | Listeria_innocua_1642_v4 | 0.8868 |
| Listeria_marthii_FSL_S4-120_702457             | Listeria_innocua_1642_v4 | 0.8286 |
| Listeria_marthii_529731_v1                     | Listeria_innocua_1642_v4 | 0.8739 |
| Listeria_marthii_529731                        | Listeria_innocua_1642_v4 | 0.8718 |
| Listeria_ivanovii_WSLC3009_1457190             | Listeria_innocua_1642_v4 | 0.8479 |
| Listeria_ivanovii_subsp_londoniensis_202752_v2 | Listeria_innocua_1642_v4 | 0.8532 |
| Listeria_ivanovii_subsp_londoniensis_202752_v1 | Listeria_innocua_1642_v4 | 0.8499 |
| Listeria_ivanovii_subsp_londoniensis_202752    | Listeria_innocua_1642_v4 | 0.8451 |
| Listeria_ivanovii_subsp_ivanovii_PAM_55_881621 | Listeria_innocua_1642_v4 | 0.8473 |
| Listeria_ivanovii_subsp_ivanovii_202751_v2     | Listeria_innocua_1642_v4 | 0.8485 |
| Listeria_ivanovii_subsp_ivanovii_202751_v1     | Listeria_innocua_1642_v4 | 0.8485 |
| Listeria_ivanovii_subsp_ivanovii_202751        | Listeria_innocua_1642_v4 | 0.8485 |
| Listeria_ivanovii_FSL_F6-596_702454            | Listeria_innocua_1642_v4 | 0.7848 |
| Listeria_ivanovii_1638                         | Listeria_innocua_1642_v4 | 0.8482 |
| Listeria_innocua_FSL_S4-378_702456             | Listeria_innocua_1642_v4 | 0.8185 |
| Listeria_innocua_FSL_J1-023_702455             | Listeria_innocua_1642_v4 | 0.8453 |
| Listeria_innocua_Clip11262_272626              | Listeria_innocua_1642_v4 | 0.9219 |
| Listeria_innocua_1642_v4                       | Listeria_innocua_1642_v4 | 0.0686 |

|                                                          |                                   |        |
|----------------------------------------------------------|-----------------------------------|--------|
| Listeria_welshimeri_1643                                 | Listeria_innocua_Clip11262_272626 | 0.8557 |
| Listeria_welshimeri_serovar_6b_str_SLCC5334_386043       | Listeria_innocua_Clip11262_272626 | 0.8553 |
| Listeria_seeligeri_serovar_1_2b_str_SLCC3954_683837      | Listeria_innocua_Clip11262_272626 | 0.847  |
| Listeria_seeligeri_FSL_S4-171_702452                     | Listeria_innocua_Clip11262_272626 | 0.8024 |
| Listeria_seeligeri_FSL_N1-067_702453                     | Listeria_innocua_Clip11262_272626 | 0.8151 |
| Listeria_seeligeri_1640_v1                               | Listeria_innocua_Clip11262_272626 | 0.8514 |
| Listeria_seeligeri_1640                                  | Listeria_innocua_Clip11262_272626 | 0.8716 |
| Listeria_monocytogenes_WSLC1042_1457188                  | Listeria_innocua_Clip11262_272626 | 0.8826 |
| Listeria_monocytogenes_WSLC1001_1457187                  | Listeria_innocua_Clip11262_272626 | 0.8922 |
| Listeria_monocytogenes_SLCC7179_879090                   | Listeria_innocua_Clip11262_272626 | 0.8942 |
| Listeria_monocytogenes_SLCC5850_882096                   | Listeria_innocua_Clip11262_272626 | 0.8943 |
| Listeria_monocytogenes_SLCC2755_932919                   | Listeria_innocua_Clip11262_272626 | 0.8791 |
| Listeria_monocytogenes_SLCC2540_879089                   | Listeria_innocua_Clip11262_272626 | 0.8907 |
| Listeria_monocytogenes_SLCC2479_882020                   | Listeria_innocua_Clip11262_272626 | 0.8922 |
| Listeria_monocytogenes_SLCC2378_879088                   | Listeria_innocua_Clip11262_272626 | 0.8835 |
| Listeria_monocytogenes_SLCC2376_882097                   | Listeria_innocua_Clip11262_272626 | 0.8957 |
| Listeria_monocytogenes_SLCC2372_932920                   | Listeria_innocua_Clip11262_272626 | 0.8905 |
| Listeria_monocytogenes_serotype_4b_str_LL195_1230340     | Listeria_innocua_Clip11262_272626 | 0.8861 |
| Listeria_monocytogenes_serotype_4b_str_LIS0087_1134669   | Listeria_innocua_Clip11262_272626 | 0.8785 |
| Listeria_monocytogenes_serotype_4b_str_F2365_265669      | Listeria_innocua_Clip11262_272626 | 0.8861 |
| Listeria_monocytogenes_serotype_4b_str_CLIP_80459_568819 | Listeria_innocua_Clip11262_272626 | 0.889  |
| Listeria_monocytogenes_serotype_4b_str_81-0861_1196161   | Listeria_innocua_Clip11262_272626 | 0.8913 |
| Listeria_monocytogenes_serotype_4b_str_81-0592_1196160   | Listeria_innocua_Clip11262_272626 | 0.8923 |
| Listeria_monocytogenes_serotype_4b_str_81-0558_1196159   | Listeria_innocua_Clip11262_272626 | 0.8923 |
| Listeria_monocytogenes_serotype_4b_str_10-0809_1196162   | Listeria_innocua_Clip11262_272626 | 0.8927 |
| Listeria_monocytogenes_serotype_4b_str_02-6680_1196175   | Listeria_innocua_Clip11262_272626 | 0.8873 |
| Listeria_monocytogenes_serotype_4b_str_02-6679_1196174   | Listeria_innocua_Clip11262_272626 | 0.8873 |
| Listeria_monocytogenes_serotype_4b_str_02-1792_1196173   | Listeria_innocua_Clip11262_272626 | 0.892  |
| Listeria_monocytogenes_serotype_4b_str_02-1289_1196172   | Listeria_innocua_Clip11262_272626 | 0.892  |
| Listeria_monocytogenes_serotype_4b_str_02-1103_1196171   | Listeria_innocua_Clip11262_272626 | 0.892  |
| Listeria_monocytogenes_serotype_3c_str_10-5027_1196195   | Listeria_innocua_Clip11262_272626 | 0.8954 |
| Listeria_monocytogenes_serotype_1_2c_str_10-5026_1196194 | Listeria_innocua_Clip11262_272626 | 0.8958 |
| Listeria_monocytogenes_serotype_1_2c_str_10-5025_1196193 | Listeria_innocua_Clip11262_272626 | 0.8958 |
| Listeria_monocytogenes_serotype_1_2b_str_10-0811_1196164 | Listeria_innocua_Clip11262_272626 | 0.898  |
| Listeria_monocytogenes_serotype_1_2b_str_10-0810_1196163 | Listeria_innocua_Clip11262_272626 | 0.898  |
| Listeria_monocytogenes_serotype_1_2a_str_99-6370_1196179 | Listeria_innocua_Clip11262_272626 | 0.8838 |
| Listeria_monocytogenes_serotype_1_2a_str_98-2035_1196178 | Listeria_innocua_Clip11262_272626 | 0.8838 |
| Listeria_monocytogenes_serotype_1_2a_str_95-0093_1196177 | Listeria_innocua_Clip11262_272626 | 0.886  |
| Listeria_monocytogenes_serotype_1_2a_str_88-0478_1196176 | Listeria_innocua_Clip11262_272626 | 0.8863 |
| Listeria_monocytogenes_serotype_1_2a_str_10-5024_1196192 | Listeria_innocua_Clip11262_272626 | 0.8864 |
| Listeria_monocytogenes_serotype_1_2a_str_10-4758_1196168 | Listeria_innocua_Clip11262_272626 | 0.8897 |
| Listeria_monocytogenes_serotype_1_2a_str_10-4754_1196167 | Listeria_innocua_Clip11262_272626 | 0.89   |
| Listeria_monocytogenes_serotype_1_2a_str_10-1321_1196191 | Listeria_innocua_Clip11262_272626 | 0.8864 |
| Listeria_monocytogenes_serotype_1_2a_str_10-1047_1196190 | Listeria_innocua_Clip11262_272626 | 0.8863 |
| Listeria_monocytogenes_serotype_1_2a_str_10-1046_1196189 | Listeria_innocua_Clip11262_272626 | 0.8863 |
| Listeria_monocytogenes_serotype_1_2a_str_10-0934_1196170 | Listeria_innocua_Clip11262_272626 | 0.8942 |
| Listeria_monocytogenes_serotype_1_2a_str_10-0933_1196169 | Listeria_innocua_Clip11262_272626 | 0.8942 |
| Listeria_monocytogenes_serotype_1_2a_str_10-0815_1196188 | Listeria_innocua_Clip11262_272626 | 0.8844 |
| Listeria_monocytogenes_serotype_1_2a_str_10-0814_1196187 | Listeria_innocua_Clip11262_272626 | 0.8867 |
| Listeria_monocytogenes_serotype_1_2a_str_10-0813_1196166 | Listeria_innocua_Clip11262_272626 | 0.8987 |
| Listeria_monocytogenes_serotype_1_2a_str_10-0812_1196165 | Listeria_innocua_Clip11262_272626 | 0.8987 |
| Listeria_monocytogenes_serotype_1_2a_str_08-7669_1196186 | Listeria_innocua_Clip11262_272626 | 0.8867 |
| Listeria_monocytogenes_serotype_1_2a_str_08-7374_1196185 | Listeria_innocua_Clip11262_272626 | 0.8864 |
| Listeria_monocytogenes_serotype_1_2a_str_08-6997_1196184 | Listeria_innocua_Clip11262_272626 | 0.8844 |
| Listeria_monocytogenes_serotype_1_2a_str_08-6569_1196183 | Listeria_innocua_Clip11262_272626 | 0.8844 |
| Listeria_monocytogenes_serotype_1_2a_str_08-6056_1196182 | Listeria_innocua_Clip11262_272626 | 0.8844 |
| Listeria_monocytogenes_serotype_1_2a_str_04-5457_1196181 | Listeria_innocua_Clip11262_272626 | 0.8864 |
| Listeria_monocytogenes_serotype_1_2a_str_02-5993_1196180 | Listeria_innocua_Clip11262_272626 | 0.8864 |
| Listeria_monocytogenes_R479a_1437838                     | Listeria_innocua_Clip11262_272626 | 0.8901 |
| Listeria_monocytogenes_N53-1_1234142                     | Listeria_innocua_Clip11262_272626 | 0.8519 |
| Listeria_monocytogenes_M7_1030009                        | Listeria_innocua_Clip11262_272626 | 0.8876 |
| Listeria_monocytogenes_LO28_393132                       | Listeria_innocua_Clip11262_272626 | 0.8945 |
| Listeria_monocytogenes_L99_563174                        | Listeria_innocua_Clip11262_272626 | 0.8879 |
| Listeria_monocytogenes_L312_882094                       | Listeria_innocua_Clip11262_272626 | 0.889  |
| Listeria_monocytogenes_J1816_930781                      | Listeria_innocua_Clip11262_272626 | 0.8884 |
| Listeria_monocytogenes_J1-220_930782                     | Listeria_innocua_Clip11262_272626 | 0.8949 |
| Listeria_monocytogenes_J0161_393130                      | Listeria_innocua_Clip11262_272626 | 0.8934 |
| Listeria_monocytogenes_HCC23_552536                      | Listeria_innocua_Clip11262_272626 | 0.8872 |
| Listeria_monocytogenes_FSL_R2-561_393126                 | Listeria_innocua_Clip11262_272626 | 0.8923 |
| Listeria_monocytogenes_FSL_J1-208_393119                 | Listeria_innocua_Clip11262_272626 | 0.8714 |
| Listeria_monocytogenes_FSL_J1-175_393118                 | Listeria_innocua_Clip11262_272626 | 0.8939 |
| Listeria_monocytogenes_Finland_1998_393127               | Listeria_innocua_Clip11262_272626 | 0.8871 |
| Listeria_monocytogenes_EGD-e_169963_v1                   | Listeria_innocua_Clip11262_272626 | 0.8956 |
| Listeria_monocytogenes_EGD-e_169963                      | Listeria_innocua_Clip11262_272626 | 0.896  |
| Listeria_monocytogenes_EGD_1334565                       | Listeria_innocua_Clip11262_272626 | 0.895  |
| Listeria_monocytogenes_CFSAN002349_1299895               | Listeria_innocua_Clip11262_272626 | 0.8889 |
| Listeria_monocytogenes_ATCC_19117_882095_v1              | Listeria_innocua_Clip11262_272626 | 0.8865 |
| Listeria_monocytogenes_ATCC_19117_882095                 | Listeria_innocua_Clip11262_272626 | 0.8861 |
| Listeria_monocytogenes_6179_1288295                      | Listeria_innocua_Clip11262_272626 | 0.8974 |
| Listeria_monocytogenes_1639_v9                           | Listeria_innocua_Clip11262_272626 | 0.9087 |
| Listeria_monocytogenes_1639_v99                          | Listeria_innocua_Clip11262_272626 | 0.8961 |
| Listeria_monocytogenes_1639_v98                          | Listeria_innocua_Clip11262_272626 | 0.8955 |
| Listeria_monocytogenes_1639_v97                          | Listeria_innocua_Clip11262_272626 | 0.8901 |
| Listeria_monocytogenes_1639_v96                          | Listeria_innocua_Clip11262_272626 | 0.8954 |
| Listeria_monocytogenes_1639_v95                          | Listeria_innocua_Clip11262_272626 | 0.8954 |
| Listeria_monocytogenes_1639_v94                          | Listeria_innocua_Clip11262_272626 | 0.8957 |
| Listeria_monocytogenes_1639_v93                          | Listeria_innocua_Clip11262_272626 | 0.8812 |
| Listeria_monocytogenes_1639_v92                          | Listeria_innocua_Clip11262_272626 | 0.8961 |
| Listeria_monocytogenes_1639_v91                          | Listeria_innocua_Clip11262_272626 | 0.8955 |
| Listeria_monocytogenes_1639_v90                          | Listeria_innocua_Clip11262_272626 | 0.8955 |
| Listeria_monocytogenes_1639_v8                           | Listeria_innocua_Clip11262_272626 | 0.8824 |

[illegible]





|                                                          |                                    |        |
|----------------------------------------------------------|------------------------------------|--------|
| Listeria_monocytogenes_1639_v103                         | Listeria_innocua_Clip11262_272626  | 0.8859 |
| Listeria_monocytogenes_1639_v102                         | Listeria_innocua_Clip11262_272626  | 0.8957 |
| Listeria_monocytogenes_1639_v101                         | Listeria_innocua_Clip11262_272626  | 0.8912 |
| Listeria_monocytogenes_1639_v100                         | Listeria_innocua_Clip11262_272626  | 0.8894 |
| Listeria_monocytogenes_1639                              | Listeria_innocua_Clip11262_272626  | 0.8933 |
| Listeria_monocytogenes_10403S_393133                     | Listeria_innocua_Clip11262_272626  | 0.8974 |
| Listeria_monocytogenes_08-5923_637381                    | Listeria_innocua_Clip11262_272626  | 0.8864 |
| Listeria_monocytogenes_08-5578_653938                    | Listeria_innocua_Clip11262_272626  | 0.8813 |
| Listeria_monocytogenes_07PF0776_1126011                  | Listeria_innocua_Clip11262_272626  | 0.8835 |
| Listeria_marthii_FSL_S4-120_702457                       | Listeria_innocua_Clip11262_272626  | 0.8238 |
| Listeria_marthii_529731_v1                               | Listeria_innocua_Clip11262_272626  | 0.8777 |
| Listeria_marthii_529731                                  | Listeria_innocua_Clip11262_272626  | 0.866  |
| Listeria_ivanovii_WSLC3009_1457190                       | Listeria_innocua_Clip11262_272626  | 0.8464 |
| Listeria_ivanovii_subsp_londoniensis_202752_v2           | Listeria_innocua_Clip11262_272626  | 0.8456 |
| Listeria_ivanovii_subsp_londoniensis_202752_v1           | Listeria_innocua_Clip11262_272626  | 0.8507 |
| Listeria_ivanovii_subsp_londoniensis_202752              | Listeria_innocua_Clip11262_272626  | 0.8495 |
| Listeria_ivanovii_subsp_ivanovii_PAM_55_881621           | Listeria_innocua_Clip11262_272626  | 0.8452 |
| Listeria_ivanovii_subsp_ivanovii_202751_v2               | Listeria_innocua_Clip11262_272626  | 0.8468 |
| Listeria_ivanovii_subsp_ivanovii_202751_v1               | Listeria_innocua_Clip11262_272626  | 0.8468 |
| Listeria_ivanovii_subsp_ivanovii_202751                  | Listeria_innocua_Clip11262_272626  | 0.8468 |
| Listeria_ivanovii_FSL_F6-596_702454                      | Listeria_innocua_Clip11262_272626  | 0.7901 |
| Listeria_ivanovii_1638                                   | Listeria_innocua_Clip11262_272626  | 0.8468 |
| Listeria_innocua_FSL_S4-378_702456                       | Listeria_innocua_Clip11262_272626  | 0.8175 |
| Listeria_innocua_FSL_J1-023_702455                       | Listeria_innocua_Clip11262_272626  | 0.8439 |
| Listeria_innocua_Clip11262_272626                        | Listeria_innocua_Clip11262_272626  | 0.0873 |
| Listeria_welshimeri_1643                                 | Listeria_innocua_FSL_J1-023_702455 | 0.8482 |
| Listeria_welshimeri_serovar_6b_str_SLCC5334_386043       | Listeria_innocua_FSL_J1-023_702455 | 0.8479 |
| Listeria_seeligeri_serovar_1_2b_str_SLCC3954_683837      | Listeria_innocua_FSL_J1-023_702455 | 0.8444 |
| Listeria_seeligeri_FSL_S4-171_702452                     | Listeria_innocua_FSL_J1-023_702455 | 0.7958 |
| Listeria_seeligeri_FSL_N1-067_702453                     | Listeria_innocua_FSL_J1-023_702455 | 0.795  |
| Listeria_seeligeri_1640_v1                               | Listeria_innocua_FSL_J1-023_702455 | 0.8444 |
| Listeria_seeligeri_1640                                  | Listeria_innocua_FSL_J1-023_702455 | 0.8387 |
| Listeria_monocytogenes_WSLC1042_1457188                  | Listeria_innocua_FSL_J1-023_702455 | 0.8802 |
| Listeria_monocytogenes_WSLC1001_1457187                  | Listeria_innocua_FSL_J1-023_702455 | 0.869  |
| Listeria_monocytogenes_SLCC7179_879090                   | Listeria_innocua_FSL_J1-023_702455 | 0.8764 |
| Listeria_monocytogenes_SLCC5850_882096                   | Listeria_innocua_FSL_J1-023_702455 | 0.8727 |
| Listeria_monocytogenes_SLCC2755_932919                   | Listeria_innocua_FSL_J1-023_702455 | 0.864  |
| Listeria_monocytogenes_SLCC2540_879089                   | Listeria_innocua_FSL_J1-023_702455 | 0.8678 |
| Listeria_monocytogenes_SLCC2479_882020                   | Listeria_innocua_FSL_J1-023_702455 | 0.8672 |
| Listeria_monocytogenes_SLCC2378_879088                   | Listeria_innocua_FSL_J1-023_702455 | 0.8812 |
| Listeria_monocytogenes_SLCC2376_882097                   | Listeria_innocua_FSL_J1-023_702455 | 0.8882 |
| Listeria_monocytogenes_SLCC2372_932920                   | Listeria_innocua_FSL_J1-023_702455 | 0.8602 |
| Listeria_monocytogenes_serotype_4b_str_LL195_1230340     | Listeria_innocua_FSL_J1-023_702455 | 0.8864 |
| Listeria_monocytogenes_serotype_4b_str_LIS0087_1134669   | Listeria_innocua_FSL_J1-023_702455 | 0.8497 |
| Listeria_monocytogenes_serotype_4b_str_F2365_265669      | Listeria_innocua_FSL_J1-023_702455 | 0.8864 |
| Listeria_monocytogenes_serotype_4b_str_CLIP_80459_568819 | Listeria_innocua_FSL_J1-023_702455 | 0.8827 |
| Listeria_monocytogenes_serotype_4b_str_81-0861_1196161   | Listeria_innocua_FSL_J1-023_702455 | 0.8717 |
| Listeria_monocytogenes_serotype_4b_str_81-0592_1196160   | Listeria_innocua_FSL_J1-023_702455 | 0.8728 |
| Listeria_monocytogenes_serotype_4b_str_81-0558_1196159   | Listeria_innocua_FSL_J1-023_702455 | 0.8723 |
| Listeria_monocytogenes_serotype_4b_str_10-0809_1196162   | Listeria_innocua_FSL_J1-023_702455 | 0.8732 |
| Listeria_monocytogenes_serotype_4b_str_02-6680_1196175   | Listeria_innocua_FSL_J1-023_702455 | 0.8829 |
| Listeria_monocytogenes_serotype_4b_str_02-6679_1196174   | Listeria_innocua_FSL_J1-023_702455 | 0.8829 |
| Listeria_monocytogenes_serotype_4b_str_02-1792_1196173   | Listeria_innocua_FSL_J1-023_702455 | 0.8732 |
| Listeria_monocytogenes_serotype_4b_str_02-1289_1196172   | Listeria_innocua_FSL_J1-023_702455 | 0.8732 |
| Listeria_monocytogenes_serotype_4b_str_02-1103_1196171   | Listeria_innocua_FSL_J1-023_702455 | 0.8732 |
| Listeria_monocytogenes_serotype_3c_str_10-5027_1196195   | Listeria_innocua_FSL_J1-023_702455 | 0.8652 |
| Listeria_monocytogenes_serotype_1_2c_str_10-5026_1196194 | Listeria_innocua_FSL_J1-023_702455 | 0.8656 |
| Listeria_monocytogenes_serotype_1_2c_str_10-5025_1196193 | Listeria_innocua_FSL_J1-023_702455 | 0.8656 |
| Listeria_monocytogenes_serotype_1_2b_str_10-0811_1196164 | Listeria_innocua_FSL_J1-023_702455 | 0.8604 |
| Listeria_monocytogenes_serotype_1_2b_str_10-0810_1196163 | Listeria_innocua_FSL_J1-023_702455 | 0.8604 |
| Listeria_monocytogenes_serotype_1_2a_str_99-6370_1196179 | Listeria_innocua_FSL_J1-023_702455 | 0.8521 |
| Listeria_monocytogenes_serotype_1_2a_str_98-2035_1196178 | Listeria_innocua_FSL_J1-023_702455 | 0.8521 |
| Listeria_monocytogenes_serotype_1_2a_str_95-0093_1196177 | Listeria_innocua_FSL_J1-023_702455 | 0.8565 |
| Listeria_monocytogenes_serotype_1_2a_str_88-0478_1196176 | Listeria_innocua_FSL_J1-023_702455 | 0.8549 |
| Listeria_monocytogenes_serotype_1_2a_str_10-5024_1196192 | Listeria_innocua_FSL_J1-023_702455 | 0.8565 |
| Listeria_monocytogenes_serotype_1_2a_str_10-4758_1196168 | Listeria_innocua_FSL_J1-023_702455 | 0.8745 |
| Listeria_monocytogenes_serotype_1_2a_str_10-4754_1196167 | Listeria_innocua_FSL_J1-023_702455 | 0.8748 |
| Listeria_monocytogenes_serotype_1_2a_str_10-1321_1196191 | Listeria_innocua_FSL_J1-023_702455 | 0.8565 |
| Listeria_monocytogenes_serotype_1_2a_str_10-1047_1196190 | Listeria_innocua_FSL_J1-023_702455 | 0.8572 |
| Listeria_monocytogenes_serotype_1_2a_str_10-1046_1196189 | Listeria_innocua_FSL_J1-023_702455 | 0.8572 |
| Listeria_monocytogenes_serotype_1_2a_str_10-0934_1196170 | Listeria_innocua_FSL_J1-023_702455 | 0.8842 |
| Listeria_monocytogenes_serotype_1_2a_str_10-0933_1196169 | Listeria_innocua_FSL_J1-023_702455 | 0.8842 |
| Listeria_monocytogenes_serotype_1_2a_str_10-0815_1196188 | Listeria_innocua_FSL_J1-023_702455 | 0.853  |
| Listeria_monocytogenes_serotype_1_2a_str_10-0814_1196187 | Listeria_innocua_FSL_J1-023_702455 | 0.8569 |
| Listeria_monocytogenes_serotype_1_2a_str_10-0813_1196166 | Listeria_innocua_FSL_J1-023_702455 | 0.8671 |
| Listeria_monocytogenes_serotype_1_2a_str_10-0812_1196165 | Listeria_innocua_FSL_J1-023_702455 | 0.8671 |
| Listeria_monocytogenes_serotype_1_2a_str_08-7669_1196186 | Listeria_innocua_FSL_J1-023_702455 | 0.8639 |
| Listeria_monocytogenes_serotype_1_2a_str_08-7374_1196185 | Listeria_innocua_FSL_J1-023_702455 | 0.8565 |
| Listeria_monocytogenes_serotype_1_2a_str_08-6997_1196184 | Listeria_innocua_FSL_J1-023_702455 | 0.853  |
| Listeria_monocytogenes_serotype_1_2a_str_08-6569_1196183 | Listeria_innocua_FSL_J1-023_702455 | 0.853  |
| Listeria_monocytogenes_serotype_1_2a_str_08-6056_1196182 | Listeria_innocua_FSL_J1-023_702455 | 0.853  |
| Listeria_monocytogenes_serotype_1_2a_str_04-5457_1196181 | Listeria_innocua_FSL_J1-023_702455 | 0.8565 |
| Listeria_monocytogenes_serotype_1_2a_str_02-5993_1196180 | Listeria_innocua_FSL_J1-023_702455 | 0.8565 |
| Listeria_monocytogenes_R479a_1437838                     | Listeria_innocua_FSL_J1-023_702455 | 0.8555 |
| Listeria_monocytogenes_N53-1_1234142                     | Listeria_innocua_FSL_J1-023_702455 | 0.8377 |
| Listeria_monocytogenes_M7_1030009                        | Listeria_innocua_FSL_J1-023_702455 | 0.8729 |
| Listeria_monocytogenes_LO28_393132                       | Listeria_innocua_FSL_J1-023_702455 | 0.8655 |
| Listeria_monocytogenes_L99_563174                        | Listeria_innocua_FSL_J1-023_702455 | 0.8733 |
| Listeria_monocytogenes_L312_882094                       | Listeria_innocua_FSL_J1-023_702455 | 0.8827 |
| Listeria_monocytogenes_J1816_930781                      | Listeria_innocua_FSL_J1-023_702455 | 0.8667 |
| Listeria_monocytogenes_J1-220_930782                     | Listeria_innocua_FSL_J1-023_702455 | 0.8649 |



|                                             |                                    |        |
|---------------------------------------------|------------------------------------|--------|
| Listeria_monocytogenes_J0161_393130         | Listeria_innocua_FSL_J1-023_702455 | 0.8623 |
| Listeria_monocytogenes_HCC23_552536         | Listeria_innocua_FSL_J1-023_702455 | 0.8729 |
| Listeria_monocytogenes_FSL_R2-561_393126    | Listeria_innocua_FSL_J1-023_702455 | 0.8654 |
| Listeria_monocytogenes_FSL_J1-208_393119    | Listeria_innocua_FSL_J1-023_702455 | 0.8706 |
| Listeria_monocytogenes_FSL_J1-175_393118    | Listeria_innocua_FSL_J1-023_702455 | 0.8739 |
| Listeria_monocytogenes_Finland_1998_393127  | Listeria_innocua_FSL_J1-023_702455 | 0.881  |
| Listeria_monocytogenes_EGD-e_169963_v1      | Listeria_innocua_FSL_J1-023_702455 | 0.8734 |
| Listeria_monocytogenes_EGD-e_169963         | Listeria_innocua_FSL_J1-023_702455 | 0.8738 |
| Listeria_monocytogenes_EGD_1334565          | Listeria_innocua_FSL_J1-023_702455 | 0.8734 |
| Listeria_monocytogenes_CFSAN002349_1299895  | Listeria_innocua_FSL_J1-023_702455 | 0.8819 |
| Listeria_monocytogenes_ATCC_19117_882095_v1 | Listeria_innocua_FSL_J1-023_702455 | 0.8793 |
| Listeria_monocytogenes_ATCC_19117_882095    | Listeria_innocua_FSL_J1-023_702455 | 0.8793 |
| Listeria_monocytogenes_6179_1288295         | Listeria_innocua_FSL_J1-023_702455 | 0.8517 |
| Listeria_monocytogenes_1639_v9              | Listeria_innocua_FSL_J1-023_702455 | 0.846  |
| Listeria_monocytogenes_1639_v99             | Listeria_innocua_FSL_J1-023_702455 | 0.8679 |
| Listeria_monocytogenes_1639_v98             | Listeria_innocua_FSL_J1-023_702455 | 0.8593 |
| Listeria_monocytogenes_1639_v97             | Listeria_innocua_FSL_J1-023_702455 | 0.8719 |
| Listeria_monocytogenes_1639_v96             | Listeria_innocua_FSL_J1-023_702455 | 0.8673 |
| Listeria_monocytogenes_1639_v95             | Listeria_innocua_FSL_J1-023_702455 | 0.8673 |
| Listeria_monocytogenes_1639_v94             | Listeria_innocua_FSL_J1-023_702455 | 0.8676 |
| Listeria_monocytogenes_1639_v93             | Listeria_innocua_FSL_J1-023_702455 | 0.8618 |
| Listeria_monocytogenes_1639_v92             | Listeria_innocua_FSL_J1-023_702455 | 0.8684 |
| Listeria_monocytogenes_1639_v91             | Listeria_innocua_FSL_J1-023_702455 | 0.8732 |
| Listeria_monocytogenes_1639_v90             | Listeria_innocua_FSL_J1-023_702455 | 0.8595 |
| Listeria_monocytogenes_1639_v8              | Listeria_innocua_FSL_J1-023_702455 | 0.8477 |
| Listeria_monocytogenes_1639_v89             | Listeria_innocua_FSL_J1-023_702455 | 0.8764 |
| Listeria_monocytogenes_1639_v88             | Listeria_innocua_FSL_J1-023_702455 | 0.8684 |
| Listeria_monocytogenes_1639_v87             | Listeria_innocua_FSL_J1-023_702455 | 0.8616 |
| Listeria_monocytogenes_1639_v86             | Listeria_innocua_FSL_J1-023_702455 | 0.8616 |
| Listeria_monocytogenes_1639_v85             | Listeria_innocua_FSL_J1-023_702455 | 0.8715 |
| Listeria_monocytogenes_1639_v84             | Listeria_innocua_FSL_J1-023_702455 | 0.8673 |
| Listeria_monocytogenes_1639_v83             | Listeria_innocua_FSL_J1-023_702455 | 0.8702 |
| Listeria_monocytogenes_1639_v82             | Listeria_innocua_FSL_J1-023_702455 | 0.8699 |
| Listeria_monocytogenes_1639_v81             | Listeria_innocua_FSL_J1-023_702455 | 0.8649 |
| Listeria_monocytogenes_1639_v80             | Listeria_innocua_FSL_J1-023_702455 | 0.8653 |
| Listeria_monocytogenes_1639_v7              | Listeria_innocua_FSL_J1-023_702455 | 0.8477 |
| Listeria_monocytogenes_1639_v79             | Listeria_innocua_FSL_J1-023_702455 | 0.8624 |
| Listeria_monocytogenes_1639_v78             | Listeria_innocua_FSL_J1-023_702455 | 0.8642 |
| Listeria_monocytogenes_1639_v77             | Listeria_innocua_FSL_J1-023_702455 | 0.8656 |
| Listeria_monocytogenes_1639_v76             | Listeria_innocua_FSL_J1-023_702455 | 0.859  |
| Listeria_monocytogenes_1639_v75             | Listeria_innocua_FSL_J1-023_702455 | 0.8733 |
| Listeria_monocytogenes_1639_v74             | Listeria_innocua_FSL_J1-023_702455 | 0.8596 |
| Listeria_monocytogenes_1639_v73             | Listeria_innocua_FSL_J1-023_702455 | 0.8604 |
| Listeria_monocytogenes_1639_v72             | Listeria_innocua_FSL_J1-023_702455 | 0.8686 |
| Listeria_monocytogenes_1639_v71             | Listeria_innocua_FSL_J1-023_702455 | 0.8511 |
| Listeria_monocytogenes_1639_v70             | Listeria_innocua_FSL_J1-023_702455 | 0.8639 |
| Listeria_monocytogenes_1639_v6              | Listeria_innocua_FSL_J1-023_702455 | 0.8474 |
| Listeria_monocytogenes_1639_v69             | Listeria_innocua_FSL_J1-023_702455 | 0.8728 |
| Listeria_monocytogenes_1639_v68             | Listeria_innocua_FSL_J1-023_702455 | 0.8668 |
| Listeria_monocytogenes_1639_v67             | Listeria_innocua_FSL_J1-023_702455 | 0.8641 |
| Listeria_monocytogenes_1639_v66             | Listeria_innocua_FSL_J1-023_702455 | 0.8738 |
| Listeria_monocytogenes_1639_v65             | Listeria_innocua_FSL_J1-023_702455 | 0.8588 |
| Listeria_monocytogenes_1639_v64             | Listeria_innocua_FSL_J1-023_702455 | 0.8686 |
| Listeria_monocytogenes_1639_v63             | Listeria_innocua_FSL_J1-023_702455 | 0.8614 |
| Listeria_monocytogenes_1639_v62             | Listeria_innocua_FSL_J1-023_702455 | 0.8601 |
| Listeria_monocytogenes_1639_v61             | Listeria_innocua_FSL_J1-023_702455 | 0.8615 |
| Listeria_monocytogenes_1639_v60             | Listeria_innocua_FSL_J1-023_702455 | 0.8637 |
| Listeria_monocytogenes_1639_v5              | Listeria_innocua_FSL_J1-023_702455 | 0.8294 |
| Listeria_monocytogenes_1639_v59             | Listeria_innocua_FSL_J1-023_702455 | 0.8737 |
| Listeria_monocytogenes_1639_v58             | Listeria_innocua_FSL_J1-023_702455 | 0.871  |
| Listeria_monocytogenes_1639_v57             | Listeria_innocua_FSL_J1-023_702455 | 0.8644 |
| Listeria_monocytogenes_1639_v56             | Listeria_innocua_FSL_J1-023_702455 | 0.8706 |
| Listeria_monocytogenes_1639_v55             | Listeria_innocua_FSL_J1-023_702455 | 0.8618 |
| Listeria_monocytogenes_1639_v54             | Listeria_innocua_FSL_J1-023_702455 | 0.87   |
| Listeria_monocytogenes_1639_v53             | Listeria_innocua_FSL_J1-023_702455 | 0.8698 |
| Listeria_monocytogenes_1639_v52             | Listeria_innocua_FSL_J1-023_702455 | 0.871  |
| Listeria_monocytogenes_1639_v51             | Listeria_innocua_FSL_J1-023_702455 | 0.8648 |
| Listeria_monocytogenes_1639_v50             | Listeria_innocua_FSL_J1-023_702455 | 0.8558 |
| Listeria_monocytogenes_1639_v4              | Listeria_innocua_FSL_J1-023_702455 | 0.8414 |
| Listeria_monocytogenes_1639_v49             | Listeria_innocua_FSL_J1-023_702455 | 0.8853 |
| Listeria_monocytogenes_1639_v48             | Listeria_innocua_FSL_J1-023_702455 | 0.8607 |
| Listeria_monocytogenes_1639_v47             | Listeria_innocua_FSL_J1-023_702455 | 0.8562 |
| Listeria_monocytogenes_1639_v46             | Listeria_innocua_FSL_J1-023_702455 | 0.8657 |
| Listeria_monocytogenes_1639_v45             | Listeria_innocua_FSL_J1-023_702455 | 0.8481 |
| Listeria_monocytogenes_1639_v44             | Listeria_innocua_FSL_J1-023_702455 | 0.8565 |
| Listeria_monocytogenes_1639_v43             | Listeria_innocua_FSL_J1-023_702455 | 0.8565 |
| Listeria_monocytogenes_1639_v42             | Listeria_innocua_FSL_J1-023_702455 | 0.8581 |
| Listeria_monocytogenes_1639_v41             | Listeria_innocua_FSL_J1-023_702455 | 0.8432 |
| Listeria_monocytogenes_1639_v40             | Listeria_innocua_FSL_J1-023_702455 | 0.8658 |
| Listeria_monocytogenes_1639_v3              | Listeria_innocua_FSL_J1-023_702455 | 0.8418 |
| Listeria_monocytogenes_1639_v39             | Listeria_innocua_FSL_J1-023_702455 | 0.8609 |
| Listeria_monocytogenes_1639_v38             | Listeria_innocua_FSL_J1-023_702455 | 0.8647 |
| Listeria_monocytogenes_1639_v37             | Listeria_innocua_FSL_J1-023_702455 | 0.8585 |
| Listeria_monocytogenes_1639_v36             | Listeria_innocua_FSL_J1-023_702455 | 0.856  |
| Listeria_monocytogenes_1639_v35             | Listeria_innocua_FSL_J1-023_702455 | 0.8672 |
| Listeria_monocytogenes_1639_v34             | Listeria_innocua_FSL_J1-023_702455 | 0.8598 |
| Listeria_monocytogenes_1639_v33             | Listeria_innocua_FSL_J1-023_702455 | 0.8604 |
| Listeria_monocytogenes_1639_v32             | Listeria_innocua_FSL_J1-023_702455 | 0.8583 |
| Listeria_monocytogenes_1639_v31             | Listeria_innocua_FSL_J1-023_702455 | 0.8602 |
| Listeria_monocytogenes_1639_v30             | Listeria_innocua_FSL_J1-023_702455 | 0.8579 |
| Listeria_monocytogenes_1639_v2              | Listeria_innocua_FSL_J1-023_702455 | 0.8277 |

[illegible]

|                                                          |                                    |        |
|----------------------------------------------------------|------------------------------------|--------|
| Listeria_monocytogenes_1639_v126                         | Listeria_innocua_FSL_J1-023_702455 | 0.8748 |
| Listeria_monocytogenes_1639_v125                         | Listeria_innocua_FSL_J1-023_702455 | 0.8756 |
| Listeria_monocytogenes_1639_v124                         | Listeria_innocua_FSL_J1-023_702455 | 0.8722 |
| Listeria_monocytogenes_1639_v123                         | Listeria_innocua_FSL_J1-023_702455 | 0.8819 |
| Listeria_monocytogenes_1639_v122                         | Listeria_innocua_FSL_J1-023_702455 | 0.8819 |
| Listeria_monocytogenes_1639_v121                         | Listeria_innocua_FSL_J1-023_702455 | 0.8819 |
| Listeria_monocytogenes_1639_v120                         | Listeria_innocua_FSL_J1-023_702455 | 0.8823 |
| Listeria_monocytogenes_1639_v11                          | Listeria_innocua_FSL_J1-023_702455 | 0.8491 |
| Listeria_monocytogenes_1639_v119                         | Listeria_innocua_FSL_J1-023_702455 | 0.8819 |
| Listeria_monocytogenes_1639_v118                         | Listeria_innocua_FSL_J1-023_702455 | 0.8819 |
| Listeria_monocytogenes_1639_v117                         | Listeria_innocua_FSL_J1-023_702455 | 0.8737 |
| Listeria_monocytogenes_1639_v116                         | Listeria_innocua_FSL_J1-023_702455 | 0.8813 |
| Listeria_monocytogenes_1639_v115                         | Listeria_innocua_FSL_J1-023_702455 | 0.8812 |
| Listeria_monocytogenes_1639_v114                         | Listeria_innocua_FSL_J1-023_702455 | 0.8681 |
| Listeria_monocytogenes_1639_v113                         | Listeria_innocua_FSL_J1-023_702455 | 0.8749 |
| Listeria_monocytogenes_1639_v112                         | Listeria_innocua_FSL_J1-023_702455 | 0.8778 |
| Listeria_monocytogenes_1639_v111                         | Listeria_innocua_FSL_J1-023_702455 | 0.8662 |
| Listeria_monocytogenes_1639_v110                         | Listeria_innocua_FSL_J1-023_702455 | 0.8666 |
| Listeria_monocytogenes_1639_v10                          | Listeria_innocua_FSL_J1-023_702455 | 0.8464 |
| Listeria_monocytogenes_1639_v109                         | Listeria_innocua_FSL_J1-023_702455 | 0.8666 |
| Listeria_monocytogenes_1639_v108                         | Listeria_innocua_FSL_J1-023_702455 | 0.8754 |
| Listeria_monocytogenes_1639_v107                         | Listeria_innocua_FSL_J1-023_702455 | 0.8783 |
| Listeria_monocytogenes_1639_v106                         | Listeria_innocua_FSL_J1-023_702455 | 0.8783 |
| Listeria_monocytogenes_1639_v105                         | Listeria_innocua_FSL_J1-023_702455 | 0.8786 |
| Listeria_monocytogenes_1639_v104                         | Listeria_innocua_FSL_J1-023_702455 | 0.8783 |
| Listeria_monocytogenes_1639_v103                         | Listeria_innocua_FSL_J1-023_702455 | 0.8786 |
| Listeria_monocytogenes_1639_v102                         | Listeria_innocua_FSL_J1-023_702455 | 0.8653 |
| Listeria_monocytogenes_1639_v101                         | Listeria_innocua_FSL_J1-023_702455 | 0.8548 |
| Listeria_monocytogenes_1639_v100                         | Listeria_innocua_FSL_J1-023_702455 | 0.8545 |
| Listeria_monocytogenes_1639                              | Listeria_innocua_FSL_J1-023_702455 | 0.8825 |
| Listeria_monocytogenes_10403S_393133                     | Listeria_innocua_FSL_J1-023_702455 | 0.8751 |
| Listeria_monocytogenes_08-5923_637381                    | Listeria_innocua_FSL_J1-023_702455 | 0.8565 |
| Listeria_monocytogenes_08-5578_653938                    | Listeria_innocua_FSL_J1-023_702455 | 0.8443 |
| Listeria_monocytogenes_07PF0776_1126011                  | Listeria_innocua_FSL_J1-023_702455 | 0.8832 |
| Listeria_marthii_FSL_S4-120_702457                       | Listeria_innocua_FSL_J1-023_702455 | 0.8349 |
| Listeria_marthii_529731_v1                               | Listeria_innocua_FSL_J1-023_702455 | 0.8512 |
| Listeria_marthii_529731                                  | Listeria_innocua_FSL_J1-023_702455 | 0.8588 |
| Listeria_ivanovii_WSLC3009_1457190                       | Listeria_innocua_FSL_J1-023_702455 | 0.8447 |
| Listeria_ivanovii_subsp_londoniensis_202752_v2           | Listeria_innocua_FSL_J1-023_702455 | 0.8418 |
| Listeria_ivanovii_subsp_londoniensis_202752_v1           | Listeria_innocua_FSL_J1-023_702455 | 0.8423 |
| Listeria_ivanovii_subsp_londoniensis_202752              | Listeria_innocua_FSL_J1-023_702455 | 0.8366 |
| Listeria_ivanovii_subsp_ivanovii_PAM_55_881621           | Listeria_innocua_FSL_J1-023_702455 | 0.8438 |
| Listeria_ivanovii_subsp_ivanovii_202751_v2               | Listeria_innocua_FSL_J1-023_702455 | 0.845  |
| Listeria_ivanovii_subsp_ivanovii_202751_v1               | Listeria_innocua_FSL_J1-023_702455 | 0.845  |
| Listeria_ivanovii_subsp_ivanovii_202751                  | Listeria_innocua_FSL_J1-023_702455 | 0.845  |
| Listeria_ivanovii_FSL_F6-596_702454                      | Listeria_innocua_FSL_J1-023_702455 | 0.7859 |
| Listeria_ivanovii_1638                                   | Listeria_innocua_FSL_J1-023_702455 | 0.8458 |
| Listeria_innocua_FSL_S4-378_702456                       | Listeria_innocua_FSL_J1-023_702455 | 0.8228 |
| Listeria_innocua_FSL_J1-023_702455                       | Listeria_innocua_FSL_J1-023_702455 | 0.0577 |
| Listeria_welshimeri_1643                                 | Listeria_innocua_FSL_S4-378_702456 | 0.7969 |
| Listeria_welshimeri_serovar_6b_str_SLCC5334_386043       | Listeria_innocua_FSL_S4-378_702456 | 0.7963 |
| Listeria_seeligeri_serovar_1_2b_str_SLCC3954_683837      | Listeria_innocua_FSL_S4-378_702456 | 0.7919 |
| Listeria_seeligeri_FSL_S4-171_702452                     | Listeria_innocua_FSL_S4-378_702456 | 0.757  |
| Listeria_seeligeri_FSL_N1-067_702453                     | Listeria_innocua_FSL_S4-378_702456 | 0.7494 |
| Listeria_seeligeri_1640_v1                               | Listeria_innocua_FSL_S4-378_702456 | 0.7967 |
| Listeria_seeligeri_1640                                  | Listeria_innocua_FSL_S4-378_702456 | 0.7913 |
| Listeria_monocytogenes_WSLC1042_1457188                  | Listeria_innocua_FSL_S4-378_702456 | 0.8268 |
| Listeria_monocytogenes_WSLC1001_1457187                  | Listeria_innocua_FSL_S4-378_702456 | 0.824  |
| Listeria_monocytogenes_SLCC7179_879090                   | Listeria_innocua_FSL_S4-378_702456 | 0.8294 |
| Listeria_monocytogenes_SLCC5850_882096                   | Listeria_innocua_FSL_S4-378_702456 | 0.8274 |
| Listeria_monocytogenes_SLCC2755_932919                   | Listeria_innocua_FSL_S4-378_702456 | 0.8304 |
| Listeria_monocytogenes_SLCC2540_879089                   | Listeria_innocua_FSL_S4-378_702456 | 0.8208 |
| Listeria_monocytogenes_SLCC2479_882020                   | Listeria_innocua_FSL_S4-378_702456 | 0.8137 |
| Listeria_monocytogenes_SLCC2378_879088                   | Listeria_innocua_FSL_S4-378_702456 | 0.8281 |
| Listeria_monocytogenes_SLCC2376_882097                   | Listeria_innocua_FSL_S4-378_702456 | 0.8368 |
| Listeria_monocytogenes_SLCC2372_932920                   | Listeria_innocua_FSL_S4-378_702456 | 0.8072 |
| Listeria_monocytogenes_serotype_4b_str_LL195_1230340     | Listeria_innocua_FSL_S4-378_702456 | 0.8332 |
| Listeria_monocytogenes_serotype_4b_str_LIS0087_1134669   | Listeria_innocua_FSL_S4-378_702456 | 0.8075 |
| Listeria_monocytogenes_serotype_4b_str_F2365_265669      | Listeria_innocua_FSL_S4-378_702456 | 0.8332 |
| Listeria_monocytogenes_serotype_4b_str_CLIP_80459_568819 | Listeria_innocua_FSL_S4-378_702456 | 0.8389 |
| Listeria_monocytogenes_serotype_4b_str_81-0861_1196161   | Listeria_innocua_FSL_S4-378_702456 | 0.8235 |
| Listeria_monocytogenes_serotype_4b_str_81-0592_1196160   | Listeria_innocua_FSL_S4-378_702456 | 0.8245 |
| Listeria_monocytogenes_serotype_4b_str_81-0558_1196159   | Listeria_innocua_FSL_S4-378_702456 | 0.8252 |
| Listeria_monocytogenes_serotype_4b_str_10-0809_1196162   | Listeria_innocua_FSL_S4-378_702456 | 0.8249 |
| Listeria_monocytogenes_serotype_4b_str_02-6680_1196175   | Listeria_innocua_FSL_S4-378_702456 | 0.835  |
| Listeria_monocytogenes_serotype_4b_str_02-6679_1196174   | Listeria_innocua_FSL_S4-378_702456 | 0.835  |
| Listeria_monocytogenes_serotype_4b_str_02-1792_1196173   | Listeria_innocua_FSL_S4-378_702456 | 0.8249 |
| Listeria_monocytogenes_serotype_4b_str_02-1289_1196172   | Listeria_innocua_FSL_S4-378_702456 | 0.8249 |
| Listeria_monocytogenes_serotype_4b_str_02-1103_1196171   | Listeria_innocua_FSL_S4-378_702456 | 0.8249 |
| Listeria_monocytogenes_serotype_3c_str_10-5027_1196195   | Listeria_innocua_FSL_S4-378_702456 | 0.8121 |
| Listeria_monocytogenes_serotype_1_2c_str_10-5026_1196194 | Listeria_innocua_FSL_S4-378_702456 | 0.8133 |
| Listeria_monocytogenes_serotype_1_2c_str_10-5025_1196193 | Listeria_innocua_FSL_S4-378_702456 | 0.8133 |
| Listeria_monocytogenes_serotype_1_2b_str_10-0811_1196164 | Listeria_innocua_FSL_S4-378_702456 | 0.8168 |
| Listeria_monocytogenes_serotype_1_2b_str_10-0810_1196163 | Listeria_innocua_FSL_S4-378_702456 | 0.8168 |
| Listeria_monocytogenes_serotype_1_2a_str_99-6370_1196179 | Listeria_innocua_FSL_S4-378_702456 | 0.806  |
| Listeria_monocytogenes_serotype_1_2a_str_98-2035_1196178 | Listeria_innocua_FSL_S4-378_702456 | 0.806  |
| Listeria_monocytogenes_serotype_1_2a_str_95-0093_1196177 | Listeria_innocua_FSL_S4-378_702456 | 0.8105 |
| Listeria_monocytogenes_serotype_1_2a_str_88-0478_1196176 | Listeria_innocua_FSL_S4-378_702456 | 0.8095 |
| Listeria_monocytogenes_serotype_1_2a_str_10-5024_1196192 | Listeria_innocua_FSL_S4-378_702456 | 0.8108 |
| Listeria_monocytogenes_serotype_1_2a_str_10-4758_1196168 | Listeria_innocua_FSL_S4-378_702456 | 0.8227 |
| Listeria_monocytogenes_serotype_1_2a_str_10-4754_1196167 | Listeria_innocua_FSL_S4-378_702456 | 0.8227 |

|                                                          |                                    |        |
|----------------------------------------------------------|------------------------------------|--------|
| Listeria_monocytogenes_serotype_1_2a_str_10-1321_1196191 | Listeria_innocua_FSL_S4-378_702456 | 0.8108 |
| Listeria_monocytogenes_serotype_1_2a_str_10-1047_1196190 | Listeria_innocua_FSL_S4-378_702456 | 0.8111 |
| Listeria_monocytogenes_serotype_1_2a_str_10-1046_1196189 | Listeria_innocua_FSL_S4-378_702456 | 0.8111 |
| Listeria_monocytogenes_serotype_1_2a_str_10-0934_1196170 | Listeria_innocua_FSL_S4-378_702456 | 0.8344 |
| Listeria_monocytogenes_serotype_1_2a_str_10-0933_1196169 | Listeria_innocua_FSL_S4-378_702456 | 0.8344 |
| Listeria_monocytogenes_serotype_1_2a_str_10-0815_1196188 | Listeria_innocua_FSL_S4-378_702456 | 0.8072 |
| Listeria_monocytogenes_serotype_1_2a_str_10-0814_1196187 | Listeria_innocua_FSL_S4-378_702456 | 0.8108 |
| Listeria_monocytogenes_serotype_1_2a_str_10-0813_1196166 | Listeria_innocua_FSL_S4-378_702456 | 0.825  |
| Listeria_monocytogenes_serotype_1_2a_str_10-0812_1196165 | Listeria_innocua_FSL_S4-378_702456 | 0.825  |
| Listeria_monocytogenes_serotype_1_2a_str_08-7669_1196186 | Listeria_innocua_FSL_S4-378_702456 | 0.8169 |
| Listeria_monocytogenes_serotype_1_2a_str_08-7374_1196185 | Listeria_innocua_FSL_S4-378_702456 | 0.8108 |
| Listeria_monocytogenes_serotype_1_2a_str_08-6997_1196184 | Listeria_innocua_FSL_S4-378_702456 | 0.8072 |
| Listeria_monocytogenes_serotype_1_2a_str_08-6569_1196183 | Listeria_innocua_FSL_S4-378_702456 | 0.8072 |
| Listeria_monocytogenes_serotype_1_2a_str_08-6056_1196182 | Listeria_innocua_FSL_S4-378_702456 | 0.8072 |
| Listeria_monocytogenes_serotype_1_2a_str_04-5457_1196181 | Listeria_innocua_FSL_S4-378_702456 | 0.8108 |
| Listeria_monocytogenes_serotype_1_2a_str_02-5993_1196180 | Listeria_innocua_FSL_S4-378_702456 | 0.8105 |
| Listeria_monocytogenes_R479a_1437838                     | Listeria_innocua_FSL_S4-378_702456 | 0.8083 |
| Listeria_monocytogenes_N53-1_1234142                     | Listeria_innocua_FSL_S4-378_702456 | 0.7874 |
| Listeria_monocytogenes_M7_1030009                        | Listeria_innocua_FSL_S4-378_702456 | 0.8126 |
| Listeria_monocytogenes_LO28_393132                       | Listeria_innocua_FSL_S4-378_702456 | 0.816  |
| Listeria_monocytogenes_L99_563174                        | Listeria_innocua_FSL_S4-378_702456 | 0.8133 |
| Listeria_monocytogenes_L312_882094                       | Listeria_innocua_FSL_S4-378_702456 | 0.8389 |
| Listeria_monocytogenes_J1816_930781                      | Listeria_innocua_FSL_S4-378_702456 | 0.8172 |
| Listeria_monocytogenes_J1-220_930782                     | Listeria_innocua_FSL_S4-378_702456 | 0.8191 |
| Listeria_monocytogenes_J0161_393130                      | Listeria_innocua_FSL_S4-378_702456 | 0.817  |
| Listeria_monocytogenes_HCC23_552536                      | Listeria_innocua_FSL_S4-378_702456 | 0.813  |
| Listeria_monocytogenes_FSL_R2-561_393126                 | Listeria_innocua_FSL_S4-378_702456 | 0.8128 |
| Listeria_monocytogenes_FSL_J1-208_393119                 | Listeria_innocua_FSL_S4-378_702456 | 0.8266 |
| Listeria_monocytogenes_FSL_J1-175_393118                 | Listeria_innocua_FSL_S4-378_702456 | 0.8232 |
| Listeria_monocytogenes_Finland_1998_393127               | Listeria_innocua_FSL_S4-378_702456 | 0.8293 |
| Listeria_monocytogenes_EGD-e_169963_v1                   | Listeria_innocua_FSL_S4-378_702456 | 0.8214 |
| Listeria_monocytogenes_EGD-e_169963                      | Listeria_innocua_FSL_S4-378_702456 | 0.8218 |
| Listeria_monocytogenes_EGD_1334565                       | Listeria_innocua_FSL_S4-378_702456 | 0.8281 |
| Listeria_monocytogenes_CFSAN002349_1299895               | Listeria_innocua_FSL_S4-378_702456 | 0.8328 |
| Listeria_monocytogenes_ATCC_19117_882095_v1              | Listeria_innocua_FSL_S4-378_702456 | 0.8292 |
| Listeria_monocytogenes_ATCC_19117_882095                 | Listeria_innocua_FSL_S4-378_702456 | 0.8295 |
| Listeria_monocytogenes_6179_1288295                      | Listeria_innocua_FSL_S4-378_702456 | 0.8087 |
| Listeria_monocytogenes_1639_v9                           | Listeria_innocua_FSL_S4-378_702456 | 0.8036 |
| Listeria_monocytogenes_1639_v99                          | Listeria_innocua_FSL_S4-378_702456 | 0.8176 |
| Listeria_monocytogenes_1639_v98                          | Listeria_innocua_FSL_S4-378_702456 | 0.8195 |
| Listeria_monocytogenes_1639_v97                          | Listeria_innocua_FSL_S4-378_702456 | 0.8235 |
| Listeria_monocytogenes_1639_v96                          | Listeria_innocua_FSL_S4-378_702456 | 0.8166 |
| Listeria_monocytogenes_1639_v95                          | Listeria_innocua_FSL_S4-378_702456 | 0.8167 |
| Listeria_monocytogenes_1639_v94                          | Listeria_innocua_FSL_S4-378_702456 | 0.8166 |
| Listeria_monocytogenes_1639_v93                          | Listeria_innocua_FSL_S4-378_702456 | 0.8076 |
| Listeria_monocytogenes_1639_v92                          | Listeria_innocua_FSL_S4-378_702456 | 0.8188 |
| Listeria_monocytogenes_1639_v91                          | Listeria_innocua_FSL_S4-378_702456 | 0.8243 |
| Listeria_monocytogenes_1639_v90                          | Listeria_innocua_FSL_S4-378_702456 | 0.8195 |
| Listeria_monocytogenes_1639_v8                           | Listeria_innocua_FSL_S4-378_702456 | 0.8093 |
| Listeria_monocytogenes_1639_v89                          | Listeria_innocua_FSL_S4-378_702456 | 0.8305 |
| Listeria_monocytogenes_1639_v88                          | Listeria_innocua_FSL_S4-378_702456 | 0.8217 |
| Listeria_monocytogenes_1639_v87                          | Listeria_innocua_FSL_S4-378_702456 | 0.8216 |
| Listeria_monocytogenes_1639_v86                          | Listeria_innocua_FSL_S4-378_702456 | 0.8217 |
| Listeria_monocytogenes_1639_v85                          | Listeria_innocua_FSL_S4-378_702456 | 0.823  |
| Listeria_monocytogenes_1639_v84                          | Listeria_innocua_FSL_S4-378_702456 | 0.8189 |
| Listeria_monocytogenes_1639_v83                          | Listeria_innocua_FSL_S4-378_702456 | 0.8274 |
| Listeria_monocytogenes_1639_v82                          | Listeria_innocua_FSL_S4-378_702456 | 0.8267 |
| Listeria_monocytogenes_1639_v81                          | Listeria_innocua_FSL_S4-378_702456 | 0.8151 |
| Listeria_monocytogenes_1639_v80                          | Listeria_innocua_FSL_S4-378_702456 | 0.8216 |
| Listeria_monocytogenes_1639_v7                           | Listeria_innocua_FSL_S4-378_702456 | 0.8093 |
| Listeria_monocytogenes_1639_v79                          | Listeria_innocua_FSL_S4-378_702456 | 0.8132 |
| Listeria_monocytogenes_1639_v78                          | Listeria_innocua_FSL_S4-378_702456 | 0.8156 |
| Listeria_monocytogenes_1639_v77                          | Listeria_innocua_FSL_S4-378_702456 | 0.8188 |
| Listeria_monocytogenes_1639_v76                          | Listeria_innocua_FSL_S4-378_702456 | 0.8117 |
| Listeria_monocytogenes_1639_v75                          | Listeria_innocua_FSL_S4-378_702456 | 0.8133 |
| Listeria_monocytogenes_1639_v74                          | Listeria_innocua_FSL_S4-378_702456 | 0.8171 |
| Listeria_monocytogenes_1639_v73                          | Listeria_innocua_FSL_S4-378_702456 | 0.8112 |
| Listeria_monocytogenes_1639_v72                          | Listeria_innocua_FSL_S4-378_702456 | 0.8241 |
| Listeria_monocytogenes_1639_v71                          | Listeria_innocua_FSL_S4-378_702456 | 0.8056 |
| Listeria_monocytogenes_1639_v70                          | Listeria_innocua_FSL_S4-378_702456 | 0.8106 |
| Listeria_monocytogenes_1639_v6                           | Listeria_innocua_FSL_S4-378_702456 | 0.8087 |
| Listeria_monocytogenes_1639_v69                          | Listeria_innocua_FSL_S4-378_702456 | 0.8249 |
| Listeria_monocytogenes_1639_v68                          | Listeria_innocua_FSL_S4-378_702456 | 0.8181 |
| Listeria_monocytogenes_1639_v67                          | Listeria_innocua_FSL_S4-378_702456 | 0.817  |
| Listeria_monocytogenes_1639_v66                          | Listeria_innocua_FSL_S4-378_702456 | 0.8213 |
| Listeria_monocytogenes_1639_v65                          | Listeria_innocua_FSL_S4-378_702456 | 0.8155 |
| Listeria_monocytogenes_1639_v64                          | Listeria_innocua_FSL_S4-378_702456 | 0.8162 |
| Listeria_monocytogenes_1639_v63                          | Listeria_innocua_FSL_S4-378_702456 | 0.8147 |
| Listeria_monocytogenes_1639_v62                          | Listeria_innocua_FSL_S4-378_702456 | 0.8113 |
| Listeria_monocytogenes_1639_v61                          | Listeria_innocua_FSL_S4-378_702456 | 0.8155 |
| Listeria_monocytogenes_1639_v60                          | Listeria_innocua_FSL_S4-378_702456 | 0.8139 |
| Listeria_monocytogenes_1639_v5                           | Listeria_innocua_FSL_S4-378_702456 | 0.7976 |
| Listeria_monocytogenes_1639_v59                          | Listeria_innocua_FSL_S4-378_702456 | 0.8222 |
| Listeria_monocytogenes_1639_v58                          | Listeria_innocua_FSL_S4-378_702456 | 0.8242 |
| Listeria_monocytogenes_1639_v57                          | Listeria_innocua_FSL_S4-378_702456 | 0.8147 |
| Listeria_monocytogenes_1639_v56                          | Listeria_innocua_FSL_S4-378_702456 | 0.8227 |
| Listeria_monocytogenes_1639_v55                          | Listeria_innocua_FSL_S4-378_702456 | 0.8169 |
| Listeria_monocytogenes_1639_v54                          | Listeria_innocua_FSL_S4-378_702456 | 0.8207 |
| Listeria_monocytogenes_1639_v53                          | Listeria_innocua_FSL_S4-378_702456 | 0.8162 |
| Listeria_monocytogenes_1639_v52                          | Listeria_innocua_FSL_S4-378_702456 | 0.8237 |
| Listeria_monocytogenes_1639_v51                          | Listeria_innocua_FSL_S4-378_702456 | 0.8202 |

[illegible]



|                                                        |                                    |        |
|--------------------------------------------------------|------------------------------------|--------|
| Listeria_monocytogenes_1639_v148                       | Listeria_innocua_FSL_S4-378_702456 | 0.8301 |
| Listeria_monocytogenes_1639_v147                       | Listeria_innocua_FSL_S4-378_702456 | 0.8188 |
| Listeria_monocytogenes_1639_v146                       | Listeria_innocua_FSL_S4-378_702456 | 0.8303 |
| Listeria_monocytogenes_1639_v145                       | Listeria_innocua_FSL_S4-378_702456 | 0.8273 |
| Listeria_monocytogenes_1639_v144                       | Listeria_innocua_FSL_S4-378_702456 | 0.8382 |
| Listeria_monocytogenes_1639_v143                       | Listeria_innocua_FSL_S4-378_702456 | 0.8278 |
| Listeria_monocytogenes_1639_v142                       | Listeria_innocua_FSL_S4-378_702456 | 0.8386 |
| Listeria_monocytogenes_1639_v141                       | Listeria_innocua_FSL_S4-378_702456 | 0.8312 |
| Listeria_monocytogenes_1639_v140                       | Listeria_innocua_FSL_S4-378_702456 | 0.8389 |
| Listeria_monocytogenes_1639_v13                        | Listeria_innocua_FSL_S4-378_702456 | 0.8048 |
| Listeria_monocytogenes_1639_v139                       | Listeria_innocua_FSL_S4-378_702456 | 0.8341 |
| Listeria_monocytogenes_1639_v138                       | Listeria_innocua_FSL_S4-378_702456 | 0.8382 |
| Listeria_monocytogenes_1639_v137                       | Listeria_innocua_FSL_S4-378_702456 | 0.8378 |
| Listeria_monocytogenes_1639_v136                       | Listeria_innocua_FSL_S4-378_702456 | 0.8228 |
| Listeria_monocytogenes_1639_v135                       | Listeria_innocua_FSL_S4-378_702456 | 0.8196 |
| Listeria_monocytogenes_1639_v134                       | Listeria_innocua_FSL_S4-378_702456 | 0.8276 |
| Listeria_monocytogenes_1639_v133                       | Listeria_innocua_FSL_S4-378_702456 | 0.8264 |
| Listeria_monocytogenes_1639_v132                       | Listeria_innocua_FSL_S4-378_702456 | 0.8183 |
| Listeria_monocytogenes_1639_v131                       | Listeria_innocua_FSL_S4-378_702456 | 0.827  |
| Listeria_monocytogenes_1639_v130                       | Listeria_innocua_FSL_S4-378_702456 | 0.8134 |
| Listeria_monocytogenes_1639_v12                        | Listeria_innocua_FSL_S4-378_702456 | 0.8053 |
| Listeria_monocytogenes_1639_v129                       | Listeria_innocua_FSL_S4-378_702456 | 0.8292 |
| Listeria_monocytogenes_1639_v128                       | Listeria_innocua_FSL_S4-378_702456 | 0.8277 |
| Listeria_monocytogenes_1639_v127                       | Listeria_innocua_FSL_S4-378_702456 | 0.8245 |
| Listeria_monocytogenes_1639_v126                       | Listeria_innocua_FSL_S4-378_702456 | 0.8273 |
| Listeria_monocytogenes_1639_v125                       | Listeria_innocua_FSL_S4-378_702456 | 0.8194 |
| Listeria_monocytogenes_1639_v124                       | Listeria_innocua_FSL_S4-378_702456 | 0.8312 |
| Listeria_monocytogenes_1639_v123                       | Listeria_innocua_FSL_S4-378_702456 | 0.8328 |
| Listeria_monocytogenes_1639_v122                       | Listeria_innocua_FSL_S4-378_702456 | 0.8331 |
| Listeria_monocytogenes_1639_v121                       | Listeria_innocua_FSL_S4-378_702456 | 0.8331 |
| Listeria_monocytogenes_1639_v120                       | Listeria_innocua_FSL_S4-378_702456 | 0.8328 |
| Listeria_monocytogenes_1639_v11                        | Listeria_innocua_FSL_S4-378_702456 | 0.8044 |
| Listeria_monocytogenes_1639_v119                       | Listeria_innocua_FSL_S4-378_702456 | 0.8331 |
| Listeria_monocytogenes_1639_v118                       | Listeria_innocua_FSL_S4-378_702456 | 0.8331 |
| Listeria_monocytogenes_1639_v117                       | Listeria_innocua_FSL_S4-378_702456 | 0.8192 |
| Listeria_monocytogenes_1639_v116                       | Listeria_innocua_FSL_S4-378_702456 | 0.8274 |
| Listeria_monocytogenes_1639_v115                       | Listeria_innocua_FSL_S4-378_702456 | 0.8278 |
| Listeria_monocytogenes_1639_v114                       | Listeria_innocua_FSL_S4-378_702456 | 0.8232 |
| Listeria_monocytogenes_1639_v113                       | Listeria_innocua_FSL_S4-378_702456 | 0.8256 |
| Listeria_monocytogenes_1639_v112                       | Listeria_innocua_FSL_S4-378_702456 | 0.825  |
| Listeria_monocytogenes_1639_v111                       | Listeria_innocua_FSL_S4-378_702456 | 0.8236 |
| Listeria_monocytogenes_1639_v110                       | Listeria_innocua_FSL_S4-378_702456 | 0.8245 |
| Listeria_monocytogenes_1639_v10                        | Listeria_innocua_FSL_S4-378_702456 | 0.8108 |
| Listeria_monocytogenes_1639_v109                       | Listeria_innocua_FSL_S4-378_702456 | 0.8218 |
| Listeria_monocytogenes_1639_v108                       | Listeria_innocua_FSL_S4-378_702456 | 0.8278 |
| Listeria_monocytogenes_1639_v107                       | Listeria_innocua_FSL_S4-378_702456 | 0.8278 |
| Listeria_monocytogenes_1639_v106                       | Listeria_innocua_FSL_S4-378_702456 | 0.8282 |
| Listeria_monocytogenes_1639_v105                       | Listeria_innocua_FSL_S4-378_702456 | 0.8282 |
| Listeria_monocytogenes_1639_v104                       | Listeria_innocua_FSL_S4-378_702456 | 0.8285 |
| Listeria_monocytogenes_1639_v103                       | Listeria_innocua_FSL_S4-378_702456 | 0.8285 |
| Listeria_monocytogenes_1639_v102                       | Listeria_innocua_FSL_S4-378_702456 | 0.8185 |
| Listeria_monocytogenes_1639_v101                       | Listeria_innocua_FSL_S4-378_702456 | 0.8083 |
| Listeria_monocytogenes_1639_v100                       | Listeria_innocua_FSL_S4-378_702456 | 0.8078 |
| Listeria_monocytogenes_1639                            | Listeria_innocua_FSL_S4-378_702456 | 0.8346 |
| Listeria_monocytogenes_10403S_393133                   | Listeria_innocua_FSL_S4-378_702456 | 0.8316 |
| Listeria_monocytogenes_08-5923_637381                  | Listeria_innocua_FSL_S4-378_702456 | 0.8108 |
| Listeria_monocytogenes_08-5578_653938                  | Listeria_innocua_FSL_S4-378_702456 | 0.7987 |
| Listeria_monocytogenes_07PF0776_1126011                | Listeria_innocua_FSL_S4-378_702456 | 0.8313 |
| Listeria_marthii_FSL_S4-120_702457                     | Listeria_innocua_FSL_S4-378_702456 | 0.7963 |
| Listeria_marthii_529731_v1                             | Listeria_innocua_FSL_S4-378_702456 | 0.8184 |
| Listeria_marthii_529731                                | Listeria_innocua_FSL_S4-378_702456 | 0.8125 |
| Listeria_ivanovii_WSLC3009_1457190                     | Listeria_innocua_FSL_S4-378_702456 | 0.7945 |
| Listeria_ivanovii_subsp_londoniensis_202752_v2         | Listeria_innocua_FSL_S4-378_702456 | 0.7908 |
| Listeria_ivanovii_subsp_londoniensis_202752_v1         | Listeria_innocua_FSL_S4-378_702456 | 0.7833 |
| Listeria_ivanovii_subsp_londoniensis_202752            | Listeria_innocua_FSL_S4-378_702456 | 0.7873 |
| Listeria_ivanovii_subsp_ivanovii_PAM_55_881621         | Listeria_innocua_FSL_S4-378_702456 | 0.7936 |
| Listeria_ivanovii_subsp_ivanovii_202751_v2             | Listeria_innocua_FSL_S4-378_702456 | 0.7951 |
| Listeria_ivanovii_subsp_ivanovii_202751_v1             | Listeria_innocua_FSL_S4-378_702456 | 0.7951 |
| Listeria_ivanovii_subsp_ivanovii_202751                | Listeria_innocua_FSL_S4-378_702456 | 0.7951 |
| Listeria_ivanovii_FSL_F6-596_702454                    | Listeria_innocua_FSL_S4-378_702456 | 0.7471 |
| Listeria_ivanovii_1638                                 | Listeria_innocua_FSL_S4-378_702456 | 0.7952 |
| Listeria_innocua_FSL_S4-378_702456                     | Listeria_innocua_FSL_S4-378_702456 | 0.0457 |
| Listeria_welshimeri_1643                               | Listeria_ivanovii_1638             | 0.8619 |
| Listeria_welshimeri_serovar_6b_str_SLCC5334_386043     | Listeria_ivanovii_1638             | 0.8616 |
| Listeria_seeligeri_serovar_1_2b_str_SLCC3954_683837    | Listeria_ivanovii_1638             | 0.8833 |
| Listeria_seeligeri_FSL_S4-171_702452                   | Listeria_ivanovii_1638             | 0.8195 |
| Listeria_seeligeri_FSL_N1-067_702453                   | Listeria_ivanovii_1638             | 0.8261 |
| Listeria_seeligeri_1640_v1                             | Listeria_ivanovii_1638             | 0.8918 |
| Listeria_seeligeri_1640                                | Listeria_ivanovii_1638             | 0.8769 |
| Listeria_monocytogenes_WSLC1042_1457188                | Listeria_ivanovii_1638             | 0.8983 |
| Listeria_monocytogenes_WSLC1001_1457187                | Listeria_ivanovii_1638             | 0.8812 |
| Listeria_monocytogenes_SLCC7179_879090                 | Listeria_ivanovii_1638             | 0.8885 |
| Listeria_monocytogenes_SLCC5850_882096                 | Listeria_ivanovii_1638             | 0.8886 |
| Listeria_monocytogenes_SLCC2755_932919                 | Listeria_ivanovii_1638             | 0.8877 |
| Listeria_monocytogenes_SLCC2540_879089                 | Listeria_ivanovii_1638             | 0.8907 |
| Listeria_monocytogenes_SLCC2479_882020                 | Listeria_ivanovii_1638             | 0.8797 |
| Listeria_monocytogenes_SLCC2378_879088                 | Listeria_ivanovii_1638             | 0.8993 |
| Listeria_monocytogenes_SLCC2376_882097                 | Listeria_ivanovii_1638             | 0.8975 |
| Listeria_monocytogenes_SLCC2372_932920                 | Listeria_ivanovii_1638             | 0.8724 |
| Listeria_monocytogenes_serotype_4b_str_LL195_1230340   | Listeria_ivanovii_1638             | 0.9052 |
| Listeria_monocytogenes_serotype_4b_str_LIS0087_1134669 | Listeria_ivanovii_1638             | 0.8622 |



|                                                          |                        |        |
|----------------------------------------------------------|------------------------|--------|
| Listeria_monocytogenes_serotype_4b_str_F2365_265669      | Listeria_ivanovii_1638 | 0.9052 |
| Listeria_monocytogenes_serotype_4b_str_CLIP_80459_568819 | Listeria_ivanovii_1638 | 0.9039 |
| Listeria_monocytogenes_serotype_4b_str_81-0861_1196161   | Listeria_ivanovii_1638 | 0.8887 |
| Listeria_monocytogenes_serotype_4b_str_81-0592_1196160   | Listeria_ivanovii_1638 | 0.8897 |
| Listeria_monocytogenes_serotype_4b_str_81-0558_1196159   | Listeria_ivanovii_1638 | 0.8904 |
| Listeria_monocytogenes_serotype_4b_str_10-0809_1196162   | Listeria_ivanovii_1638 | 0.8901 |
| Listeria_monocytogenes_serotype_4b_str_02-6680_1196175   | Listeria_ivanovii_1638 | 0.903  |
| Listeria_monocytogenes_serotype_4b_str_02-6679_1196174   | Listeria_ivanovii_1638 | 0.903  |
| Listeria_monocytogenes_serotype_4b_str_02-1792_1196173   | Listeria_ivanovii_1638 | 0.8901 |
| Listeria_monocytogenes_serotype_4b_str_02-1289_1196172   | Listeria_ivanovii_1638 | 0.8901 |
| Listeria_monocytogenes_serotype_4b_str_02-1103_1196171   | Listeria_ivanovii_1638 | 0.8901 |
| Listeria_monocytogenes_serotype_3c_str_10-5027_1196195   | Listeria_ivanovii_1638 | 0.8785 |
| Listeria_monocytogenes_serotype_1_2c_str_10-5026_1196194 | Listeria_ivanovii_1638 | 0.8793 |
| Listeria_monocytogenes_serotype_1_2c_str_10-5025_1196193 | Listeria_ivanovii_1638 | 0.8793 |
| Listeria_monocytogenes_serotype_1_2b_str_10-0811_1196164 | Listeria_ivanovii_1638 | 0.8795 |
| Listeria_monocytogenes_serotype_1_2b_str_10-0810_1196163 | Listeria_ivanovii_1638 | 0.8795 |
| Listeria_monocytogenes_serotype_1_2a_str_99-6370_1196179 | Listeria_ivanovii_1638 | 0.866  |
| Listeria_monocytogenes_serotype_1_2a_str_98-2035_1196178 | Listeria_ivanovii_1638 | 0.866  |
| Listeria_monocytogenes_serotype_1_2a_str_95-0093_1196177 | Listeria_ivanovii_1638 | 0.8711 |
| Listeria_monocytogenes_serotype_1_2a_str_88-0478_1196176 | Listeria_ivanovii_1638 | 0.87   |
| Listeria_monocytogenes_serotype_1_2a_str_10-5024_1196192 | Listeria_ivanovii_1638 | 0.8711 |
| Listeria_monocytogenes_serotype_1_2a_str_10-4758_1196168 | Listeria_ivanovii_1638 | 0.8854 |
| Listeria_monocytogenes_serotype_1_2a_str_10-4754_1196167 | Listeria_ivanovii_1638 | 0.8857 |
| Listeria_monocytogenes_serotype_1_2a_str_10-1321_1196191 | Listeria_ivanovii_1638 | 0.8711 |
| Listeria_monocytogenes_serotype_1_2a_str_10-1047_1196190 | Listeria_ivanovii_1638 | 0.8718 |
| Listeria_monocytogenes_serotype_1_2a_str_10-1046_1196189 | Listeria_ivanovii_1638 | 0.8718 |
| Listeria_monocytogenes_serotype_1_2a_str_10-0934_1196170 | Listeria_ivanovii_1638 | 0.8959 |
| Listeria_monocytogenes_serotype_1_2a_str_10-0933_1196169 | Listeria_ivanovii_1638 | 0.8959 |
| Listeria_monocytogenes_serotype_1_2a_str_10-0815_1196188 | Listeria_ivanovii_1638 | 0.8673 |
| Listeria_monocytogenes_serotype_1_2a_str_10-0814_1196187 | Listeria_ivanovii_1638 | 0.8715 |
| Listeria_monocytogenes_serotype_1_2a_str_10-0813_1196166 | Listeria_ivanovii_1638 | 0.8789 |
| Listeria_monocytogenes_serotype_1_2a_str_10-0812_1196165 | Listeria_ivanovii_1638 | 0.8789 |
| Listeria_monocytogenes_serotype_1_2a_str_08-7669_1196186 | Listeria_ivanovii_1638 | 0.8797 |
| Listeria_monocytogenes_serotype_1_2a_str_08-7374_1196185 | Listeria_ivanovii_1638 | 0.8711 |
| Listeria_monocytogenes_serotype_1_2a_str_08-6997_1196184 | Listeria_ivanovii_1638 | 0.8673 |
| Listeria_monocytogenes_serotype_1_2a_str_08-6569_1196183 | Listeria_ivanovii_1638 | 0.8673 |
| Listeria_monocytogenes_serotype_1_2a_str_08-6056_1196182 | Listeria_ivanovii_1638 | 0.8673 |
| Listeria_monocytogenes_serotype_1_2a_str_04-5457_1196181 | Listeria_ivanovii_1638 | 0.8711 |
| Listeria_monocytogenes_serotype_1_2a_str_02-5993_1196180 | Listeria_ivanovii_1638 | 0.8711 |
| Listeria_monocytogenes_R479a_1437838                     | Listeria_ivanovii_1638 | 0.8709 |
| Listeria_monocytogenes_N53-1_1234142                     | Listeria_ivanovii_1638 | 0.8499 |
| Listeria_monocytogenes_M7_1030009                        | Listeria_ivanovii_1638 | 0.8608 |
| Listeria_monocytogenes_LO28_393132                       | Listeria_ivanovii_1638 | 0.8784 |
| Listeria_monocytogenes_L99_563174                        | Listeria_ivanovii_1638 | 0.8612 |
| Listeria_monocytogenes_L312_882094                       | Listeria_ivanovii_1638 | 0.9039 |
| Listeria_monocytogenes_J1816_930781                      | Listeria_ivanovii_1638 | 0.8815 |
| Listeria_monocytogenes_J1-220_930782                     | Listeria_ivanovii_1638 | 0.8789 |
| Listeria_monocytogenes_J0161_393130                      | Listeria_ivanovii_1638 | 0.8784 |
| Listeria_monocytogenes_HCC23_552536                      | Listeria_ivanovii_1638 | 0.8608 |
| Listeria_monocytogenes_FSL_R2-561_393126                 | Listeria_ivanovii_1638 | 0.878  |
| Listeria_monocytogenes_FSL_J1-208_393119                 | Listeria_ivanovii_1638 | 0.8744 |
| Listeria_monocytogenes_FSL_J1-175_393118                 | Listeria_ivanovii_1638 | 0.8952 |
| Listeria_monocytogenes_Finland_1998_393127               | Listeria_ivanovii_1638 | 0.897  |
| Listeria_monocytogenes_EGD-e_169963_v1                   | Listeria_ivanovii_1638 | 0.8863 |
| Listeria_monocytogenes_EGD-e_169963                      | Listeria_ivanovii_1638 | 0.8867 |
| Listeria_monocytogenes_EGD_1334565                       | Listeria_ivanovii_1638 | 0.8863 |
| Listeria_monocytogenes_CFSAN002349_1299895               | Listeria_ivanovii_1638 | 0.9004 |
| Listeria_monocytogenes_ATCC_19117_882095_v1              | Listeria_ivanovii_1638 | 0.8978 |
| Listeria_monocytogenes_ATCC_19117_882095                 | Listeria_ivanovii_1638 | 0.8975 |
| Listeria_monocytogenes_6179_1288295                      | Listeria_ivanovii_1638 | 0.863  |
| Listeria_monocytogenes_1639_v9                           | Listeria_ivanovii_1638 | 0.8678 |
| Listeria_monocytogenes_1639_v99                          | Listeria_ivanovii_1638 | 0.8812 |
| Listeria_monocytogenes_1639_v98                          | Listeria_ivanovii_1638 | 0.8771 |
| Listeria_monocytogenes_1639_v97                          | Listeria_ivanovii_1638 | 0.8931 |
| Listeria_monocytogenes_1639_v96                          | Listeria_ivanovii_1638 | 0.8805 |
| Listeria_monocytogenes_1639_v95                          | Listeria_ivanovii_1638 | 0.8806 |
| Listeria_monocytogenes_1639_v94                          | Listeria_ivanovii_1638 | 0.8808 |
| Listeria_monocytogenes_1639_v93                          | Listeria_ivanovii_1638 | 0.8737 |
| Listeria_monocytogenes_1639_v92                          | Listeria_ivanovii_1638 | 0.8808 |
| Listeria_monocytogenes_1639_v91                          | Listeria_ivanovii_1638 | 0.8874 |
| Listeria_monocytogenes_1639_v90                          | Listeria_ivanovii_1638 | 0.8771 |
| Listeria_monocytogenes_1639_v8                           | Listeria_ivanovii_1638 | 0.8605 |
| Listeria_monocytogenes_1639_v89                          | Listeria_ivanovii_1638 | 0.8938 |
| Listeria_monocytogenes_1639_v88                          | Listeria_ivanovii_1638 | 0.8779 |
| Listeria_monocytogenes_1639_v87                          | Listeria_ivanovii_1638 | 0.8735 |
| Listeria_monocytogenes_1639_v86                          | Listeria_ivanovii_1638 | 0.8739 |
| Listeria_monocytogenes_1639_v85                          | Listeria_ivanovii_1638 | 0.8884 |
| Listeria_monocytogenes_1639_v84                          | Listeria_ivanovii_1638 | 0.8799 |
| Listeria_monocytogenes_1639_v83                          | Listeria_ivanovii_1638 | 0.8873 |
| Listeria_monocytogenes_1639_v82                          | Listeria_ivanovii_1638 | 0.887  |
| Listeria_monocytogenes_1639_v81                          | Listeria_ivanovii_1638 | 0.8783 |
| Listeria_monocytogenes_1639_v80                          | Listeria_ivanovii_1638 | 0.8837 |
| Listeria_monocytogenes_1639_v7                           | Listeria_ivanovii_1638 | 0.8605 |
| Listeria_monocytogenes_1639_v79                          | Listeria_ivanovii_1638 | 0.8766 |
| Listeria_monocytogenes_1639_v78                          | Listeria_ivanovii_1638 | 0.8776 |
| Listeria_monocytogenes_1639_v77                          | Listeria_ivanovii_1638 | 0.8798 |
| Listeria_monocytogenes_1639_v76                          | Listeria_ivanovii_1638 | 0.8702 |
| Listeria_monocytogenes_1639_v75                          | Listeria_ivanovii_1638 | 0.8612 |
| Listeria_monocytogenes_1639_v74                          | Listeria_ivanovii_1638 | 0.8746 |
| Listeria_monocytogenes_1639_v73                          | Listeria_ivanovii_1638 | 0.8738 |
| Listeria_monocytogenes_1639_v72                          | Listeria_ivanovii_1638 | 0.8861 |

[illegible]

|                                                |                        |        |
|------------------------------------------------|------------------------|--------|
| Listeria_monocytogenes_1639_v169               | Listeria_ivanovii_1638 | 0.8908 |
| Listeria_monocytogenes_1639_v168               | Listeria_ivanovii_1638 | 0.8964 |
| Listeria_monocytogenes_1639_v167               | Listeria_ivanovii_1638 | 0.8906 |
| Listeria_monocytogenes_1639_v166               | Listeria_ivanovii_1638 | 0.8967 |
| Listeria_monocytogenes_1639_v165               | Listeria_ivanovii_1638 | 0.8904 |
| Listeria_monocytogenes_1639_v164               | Listeria_ivanovii_1638 | 0.9066 |
| Listeria_monocytogenes_1639_v163               | Listeria_ivanovii_1638 | 0.8979 |
| Listeria_monocytogenes_1639_v162               | Listeria_ivanovii_1638 | 0.9066 |
| Listeria_monocytogenes_1639_v161               | Listeria_ivanovii_1638 | 0.9059 |
| Listeria_monocytogenes_1639_v160               | Listeria_ivanovii_1638 | 0.9059 |
| Listeria_monocytogenes_1639_v15                | Listeria_ivanovii_1638 | 0.8659 |
| Listeria_monocytogenes_1639_v159               | Listeria_ivanovii_1638 | 0.8984 |
| Listeria_monocytogenes_1639_v158               | Listeria_ivanovii_1638 | 0.9052 |
| Listeria_monocytogenes_1639_v157               | Listeria_ivanovii_1638 | 0.9052 |
| Listeria_monocytogenes_1639_v156               | Listeria_ivanovii_1638 | 0.8762 |
| Listeria_monocytogenes_1639_v155               | Listeria_ivanovii_1638 | 0.8888 |
| Listeria_monocytogenes_1639_v154               | Listeria_ivanovii_1638 | 0.8888 |
| Listeria_monocytogenes_1639_v153               | Listeria_ivanovii_1638 | 0.8891 |
| Listeria_monocytogenes_1639_v152               | Listeria_ivanovii_1638 | 0.8984 |
| Listeria_monocytogenes_1639_v151               | Listeria_ivanovii_1638 | 0.8984 |
| Listeria_monocytogenes_1639_v150               | Listeria_ivanovii_1638 | 0.888  |
| Listeria_monocytogenes_1639_v14                | Listeria_ivanovii_1638 | 0.8713 |
| Listeria_monocytogenes_1639_v149               | Listeria_ivanovii_1638 | 0.8867 |
| Listeria_monocytogenes_1639_v148               | Listeria_ivanovii_1638 | 0.8973 |
| Listeria_monocytogenes_1639_v147               | Listeria_ivanovii_1638 | 0.8852 |
| Listeria_monocytogenes_1639_v146               | Listeria_ivanovii_1638 | 0.9014 |
| Listeria_monocytogenes_1639_v145               | Listeria_ivanovii_1638 | 0.8932 |
| Listeria_monocytogenes_1639_v144               | Listeria_ivanovii_1638 | 0.904  |
| Listeria_monocytogenes_1639_v143               | Listeria_ivanovii_1638 | 0.8981 |
| Listeria_monocytogenes_1639_v142               | Listeria_ivanovii_1638 | 0.904  |
| Listeria_monocytogenes_1639_v141               | Listeria_ivanovii_1638 | 0.8992 |
| Listeria_monocytogenes_1639_v140               | Listeria_ivanovii_1638 | 0.9043 |
| Listeria_monocytogenes_1639_v13                | Listeria_ivanovii_1638 | 0.8659 |
| Listeria_monocytogenes_1639_v139               | Listeria_ivanovii_1638 | 0.8971 |
| Listeria_monocytogenes_1639_v138               | Listeria_ivanovii_1638 | 0.904  |
| Listeria_monocytogenes_1639_v137               | Listeria_ivanovii_1638 | 0.9032 |
| Listeria_monocytogenes_1639_v136               | Listeria_ivanovii_1638 | 0.8851 |
| Listeria_monocytogenes_1639_v135               | Listeria_ivanovii_1638 | 0.873  |
| Listeria_monocytogenes_1639_v134               | Listeria_ivanovii_1638 | 0.899  |
| Listeria_monocytogenes_1639_v133               | Listeria_ivanovii_1638 | 0.8919 |
| Listeria_monocytogenes_1639_v132               | Listeria_ivanovii_1638 | 0.8756 |
| Listeria_monocytogenes_1639_v131               | Listeria_ivanovii_1638 | 0.8872 |
| Listeria_monocytogenes_1639_v130               | Listeria_ivanovii_1638 | 0.879  |
| Listeria_monocytogenes_1639_v12                | Listeria_ivanovii_1638 | 0.8603 |
| Listeria_monocytogenes_1639_v129               | Listeria_ivanovii_1638 | 0.9001 |
| Listeria_monocytogenes_1639_v128               | Listeria_ivanovii_1638 | 0.8958 |
| Listeria_monocytogenes_1639_v127               | Listeria_ivanovii_1638 | 0.8867 |
| Listeria_monocytogenes_1639_v126               | Listeria_ivanovii_1638 | 0.8943 |
| Listeria_monocytogenes_1639_v125               | Listeria_ivanovii_1638 | 0.8881 |
| Listeria_monocytogenes_1639_v124               | Listeria_ivanovii_1638 | 0.8878 |
| Listeria_monocytogenes_1639_v123               | Listeria_ivanovii_1638 | 0.9004 |
| Listeria_monocytogenes_1639_v122               | Listeria_ivanovii_1638 | 0.9004 |
| Listeria_monocytogenes_1639_v121               | Listeria_ivanovii_1638 | 0.9004 |
| Listeria_monocytogenes_1639_v120               | Listeria_ivanovii_1638 | 0.9008 |
| Listeria_monocytogenes_1639_v11                | Listeria_ivanovii_1638 | 0.8593 |
| Listeria_monocytogenes_1639_v119               | Listeria_ivanovii_1638 | 0.9004 |
| Listeria_monocytogenes_1639_v118               | Listeria_ivanovii_1638 | 0.9004 |
| Listeria_monocytogenes_1639_v117               | Listeria_ivanovii_1638 | 0.8858 |
| Listeria_monocytogenes_1639_v116               | Listeria_ivanovii_1638 | 0.899  |
| Listeria_monocytogenes_1639_v115               | Listeria_ivanovii_1638 | 0.8993 |
| Listeria_monocytogenes_1639_v114               | Listeria_ivanovii_1638 | 0.8795 |
| Listeria_monocytogenes_1639_v113               | Listeria_ivanovii_1638 | 0.8943 |
| Listeria_monocytogenes_1639_v112               | Listeria_ivanovii_1638 | 0.8952 |
| Listeria_monocytogenes_1639_v111               | Listeria_ivanovii_1638 | 0.8911 |
| Listeria_monocytogenes_1639_v110               | Listeria_ivanovii_1638 | 0.8792 |
| Listeria_monocytogenes_1639_v10                | Listeria_ivanovii_1638 | 0.8641 |
| Listeria_monocytogenes_1639_v109               | Listeria_ivanovii_1638 | 0.8792 |
| Listeria_monocytogenes_1639_v108               | Listeria_ivanovii_1638 | 0.8886 |
| Listeria_monocytogenes_1639_v107               | Listeria_ivanovii_1638 | 0.8968 |
| Listeria_monocytogenes_1639_v106               | Listeria_ivanovii_1638 | 0.8968 |
| Listeria_monocytogenes_1639_v105               | Listeria_ivanovii_1638 | 0.8972 |
| Listeria_monocytogenes_1639_v104               | Listeria_ivanovii_1638 | 0.8968 |
| Listeria_monocytogenes_1639_v103               | Listeria_ivanovii_1638 | 0.8972 |
| Listeria_monocytogenes_1639_v102               | Listeria_ivanovii_1638 | 0.8814 |
| Listeria_monocytogenes_1639_v101               | Listeria_ivanovii_1638 | 0.8705 |
| Listeria_monocytogenes_1639_v100               | Listeria_ivanovii_1638 | 0.8703 |
| Listeria_monocytogenes_1639                    | Listeria_ivanovii_1638 | 0.8969 |
| Listeria_monocytogenes_10403S_393133           | Listeria_ivanovii_1638 | 0.8892 |
| Listeria_monocytogenes_08-5923_637381          | Listeria_ivanovii_1638 | 0.8711 |
| Listeria_monocytogenes_08-5578_653938          | Listeria_ivanovii_1638 | 0.8583 |
| Listeria_monocytogenes_07PF0776_1126011        | Listeria_ivanovii_1638 | 0.9037 |
| Listeria_marthii_FSL_S4-120_702457             | Listeria_ivanovii_1638 | 0.8283 |
| Listeria_marthii_529731_v1                     | Listeria_ivanovii_1638 | 0.8642 |
| Listeria_marthii_529731                        | Listeria_ivanovii_1638 | 0.8738 |
| Listeria_ivanovii_WSLC3009_1457190             | Listeria_ivanovii_1638 | 0.9981 |
| Listeria_ivanovii_subsp_londoniensis_202752_v2 | Listeria_ivanovii_1638 | 0.9024 |
| Listeria_ivanovii_subsp_londoniensis_202752_v1 | Listeria_ivanovii_1638 | 0.8914 |
| Listeria_ivanovii_subsp_londoniensis_202752    | Listeria_ivanovii_1638 | 0.8981 |
| Listeria_ivanovii_subsp_ivanovii_PAM_55_881621 | Listeria_ivanovii_1638 | 0.9946 |
| Listeria_ivanovii_subsp_ivanovii_202751_v2     | Listeria_ivanovii_1638 | 0.9985 |
| Listeria_ivanovii_subsp_ivanovii_202751_v1     | Listeria_ivanovii_1638 | 0.9985 |

|                                                          |                                     |        |
|----------------------------------------------------------|-------------------------------------|--------|
| Listeria_ivanovii_subsp_ivanovii_202751                  | Listeria_ivanovii_1638              | 0.9985 |
| Listeria_ivanovii_FSL_F6-596_702454                      | Listeria_ivanovii_1638              | 0.8338 |
| Listeria_ivanovii_1638                                   | Listeria_ivanovii_1638              | 0.062  |
| Listeria_welshimeri_1643                                 | Listeria_ivanovii_FSL_F6-596_702454 | 0.8025 |
| Listeria_welshimeri_serovar_6b_str_SLCC5334_386043       | Listeria_ivanovii_FSL_F6-596_702454 | 0.8022 |
| Listeria_seeligeri_serovar_1_2b_str_SLCC3954_683837      | Listeria_ivanovii_FSL_F6-596_702454 | 0.8169 |
| Listeria_seeligeri_FSL_S4-171_702452                     | Listeria_ivanovii_FSL_F6-596_702454 | 0.7857 |
| Listeria_seeligeri_FSL_N1-067_702453                     | Listeria_ivanovii_FSL_F6-596_702454 | 0.7872 |
| Listeria_seeligeri_1640_v1                               | Listeria_ivanovii_FSL_F6-596_702454 | 0.828  |
| Listeria_seeligeri_1640                                  | Listeria_ivanovii_FSL_F6-596_702454 | 0.815  |
| Listeria_monocytogenes_WSLC1042_1457188                  | Listeria_ivanovii_FSL_F6-596_702454 | 0.8209 |
| Listeria_monocytogenes_WSLC1001_1457187                  | Listeria_ivanovii_FSL_F6-596_702454 | 0.8117 |
| Listeria_monocytogenes_SLCC7179_879090                   | Listeria_ivanovii_FSL_F6-596_702454 | 0.8189 |
| Listeria_monocytogenes_SLCC5850_882096                   | Listeria_ivanovii_FSL_F6-596_702454 | 0.8162 |
| Listeria_monocytogenes_SLCC2755_932919                   | Listeria_ivanovii_FSL_F6-596_702454 | 0.8139 |
| Listeria_monocytogenes_SLCC2540_879089                   | Listeria_ivanovii_FSL_F6-596_702454 | 0.8147 |
| Listeria_monocytogenes_SLCC2479_882020                   | Listeria_ivanovii_FSL_F6-596_702454 | 0.8149 |
| Listeria_monocytogenes_SLCC2378_879088                   | Listeria_ivanovii_FSL_F6-596_702454 | 0.8219 |
| Listeria_monocytogenes_SLCC2376_882097                   | Listeria_ivanovii_FSL_F6-596_702454 | 0.8233 |
| Listeria_monocytogenes_SLCC2372_932920                   | Listeria_ivanovii_FSL_F6-596_702454 | 0.8087 |
| Listeria_monocytogenes_serotype_4b_str_LL195_1230340     | Listeria_ivanovii_FSL_F6-596_702454 | 0.827  |
| Listeria_monocytogenes_serotype_4b_str_LIS0087_1134669   | Listeria_ivanovii_FSL_F6-596_702454 | 0.7945 |
| Listeria_monocytogenes_serotype_4b_str_F2365_265669      | Listeria_ivanovii_FSL_F6-596_702454 | 0.827  |
| Listeria_monocytogenes_serotype_4b_str_CLIP_80459_568819 | Listeria_ivanovii_FSL_F6-596_702454 | 0.8275 |
| Listeria_monocytogenes_serotype_4b_str_81-0861_1196161   | Listeria_ivanovii_FSL_F6-596_702454 | 0.8147 |
| Listeria_monocytogenes_serotype_4b_str_81-0592_1196160   | Listeria_ivanovii_FSL_F6-596_702454 | 0.8157 |
| Listeria_monocytogenes_serotype_4b_str_81-0558_1196159   | Listeria_ivanovii_FSL_F6-596_702454 | 0.8164 |
| Listeria_monocytogenes_serotype_4b_str_10-0809_1196162   | Listeria_ivanovii_FSL_F6-596_702454 | 0.8161 |
| Listeria_monocytogenes_serotype_4b_str_02-6680_1196175   | Listeria_ivanovii_FSL_F6-596_702454 | 0.8279 |
| Listeria_monocytogenes_serotype_4b_str_02-6679_1196174   | Listeria_ivanovii_FSL_F6-596_702454 | 0.8279 |
| Listeria_monocytogenes_serotype_4b_str_02-1792_1196173   | Listeria_ivanovii_FSL_F6-596_702454 | 0.8164 |
| Listeria_monocytogenes_serotype_4b_str_02-1289_1196172   | Listeria_ivanovii_FSL_F6-596_702454 | 0.8164 |
| Listeria_monocytogenes_serotype_4b_str_02-1103_1196171   | Listeria_ivanovii_FSL_F6-596_702454 | 0.8164 |
| Listeria_monocytogenes_serotype_3c_str_10-5027_1196195   | Listeria_ivanovii_FSL_F6-596_702454 | 0.8144 |
| Listeria_monocytogenes_serotype_1_2c_str_10-5026_1196194 | Listeria_ivanovii_FSL_F6-596_702454 | 0.8153 |
| Listeria_monocytogenes_serotype_1_2c_str_10-5025_1196193 | Listeria_ivanovii_FSL_F6-596_702454 | 0.8153 |
| Listeria_monocytogenes_serotype_1_2b_str_10-0811_1196164 | Listeria_ivanovii_FSL_F6-596_702454 | 0.8065 |
| Listeria_monocytogenes_serotype_1_2b_str_10-0810_1196163 | Listeria_ivanovii_FSL_F6-596_702454 | 0.8065 |
| Listeria_monocytogenes_serotype_1_2a_str_99-6370_1196179 | Listeria_ivanovii_FSL_F6-596_702454 | 0.803  |
| Listeria_monocytogenes_serotype_1_2a_str_98-2035_1196178 | Listeria_ivanovii_FSL_F6-596_702454 | 0.803  |
| Listeria_monocytogenes_serotype_1_2a_str_95-0093_1196177 | Listeria_ivanovii_FSL_F6-596_702454 | 0.8081 |
| Listeria_monocytogenes_serotype_1_2a_str_88-0478_1196176 | Listeria_ivanovii_FSL_F6-596_702454 | 0.8065 |
| Listeria_monocytogenes_serotype_1_2a_str_10-5024_1196192 | Listeria_ivanovii_FSL_F6-596_702454 | 0.8081 |
| Listeria_monocytogenes_serotype_1_2a_str_10-4758_1196168 | Listeria_ivanovii_FSL_F6-596_702454 | 0.8138 |
| Listeria_monocytogenes_serotype_1_2a_str_10-4754_1196167 | Listeria_ivanovii_FSL_F6-596_702454 | 0.8141 |
| Listeria_monocytogenes_serotype_1_2a_str_10-1321_1196191 | Listeria_ivanovii_FSL_F6-596_702454 | 0.8081 |
| Listeria_monocytogenes_serotype_1_2a_str_10-1047_1196190 | Listeria_ivanovii_FSL_F6-596_702454 | 0.8084 |
| Listeria_monocytogenes_serotype_1_2a_str_10-1046_1196189 | Listeria_ivanovii_FSL_F6-596_702454 | 0.8084 |
| Listeria_monocytogenes_serotype_1_2a_str_10-0934_1196170 | Listeria_ivanovii_FSL_F6-596_702454 | 0.8238 |
| Listeria_monocytogenes_serotype_1_2a_str_10-0933_1196169 | Listeria_ivanovii_FSL_F6-596_702454 | 0.8238 |
| Listeria_monocytogenes_serotype_1_2a_str_10-0815_1196188 | Listeria_ivanovii_FSL_F6-596_702454 | 0.8042 |
| Listeria_monocytogenes_serotype_1_2a_str_10-0814_1196187 | Listeria_ivanovii_FSL_F6-596_702454 | 0.8081 |
| Listeria_monocytogenes_serotype_1_2a_str_10-0813_1196166 | Listeria_ivanovii_FSL_F6-596_702454 | 0.8107 |
| Listeria_monocytogenes_serotype_1_2a_str_10-0812_1196165 | Listeria_ivanovii_FSL_F6-596_702454 | 0.8107 |
| Listeria_monocytogenes_serotype_1_2a_str_08-7669_1196186 | Listeria_ivanovii_FSL_F6-596_702454 | 0.8153 |
| Listeria_monocytogenes_serotype_1_2a_str_08-7374_1196185 | Listeria_ivanovii_FSL_F6-596_702454 | 0.8081 |
| Listeria_monocytogenes_serotype_1_2a_str_08-6997_1196184 | Listeria_ivanovii_FSL_F6-596_702454 | 0.8042 |
| Listeria_monocytogenes_serotype_1_2a_str_08-6569_1196183 | Listeria_ivanovii_FSL_F6-596_702454 | 0.8042 |
| Listeria_monocytogenes_serotype_1_2a_str_08-6056_1196182 | Listeria_ivanovii_FSL_F6-596_702454 | 0.8042 |
| Listeria_monocytogenes_serotype_1_2a_str_04-5457_1196181 | Listeria_ivanovii_FSL_F6-596_702454 | 0.8081 |
| Listeria_monocytogenes_serotype_1_2a_str_02-5993_1196180 | Listeria_ivanovii_FSL_F6-596_702454 | 0.8081 |
| Listeria_monocytogenes_R479a_1437838                     | Listeria_ivanovii_FSL_F6-596_702454 | 0.8079 |
| Listeria_monocytogenes_N53-1_1234142                     | Listeria_ivanovii_FSL_F6-596_702454 | 0.783  |
| Listeria_monocytogenes_M7_1030009                        | Listeria_ivanovii_FSL_F6-596_702454 | 0.7963 |
| Listeria_monocytogenes_LO28_393132                       | Listeria_ivanovii_FSL_F6-596_702454 | 0.8106 |
| Listeria_monocytogenes_L99_563174                        | Listeria_ivanovii_FSL_F6-596_702454 | 0.7962 |
| Listeria_monocytogenes_L312_882094                       | Listeria_ivanovii_FSL_F6-596_702454 | 0.8275 |
| Listeria_monocytogenes_J1816_930781                      | Listeria_ivanovii_FSL_F6-596_702454 | 0.8184 |
| Listeria_monocytogenes_J1-220_930782                     | Listeria_ivanovii_FSL_F6-596_702454 | 0.8084 |
| Listeria_monocytogenes_J0161_393130                      | Listeria_ivanovii_FSL_F6-596_702454 | 0.8182 |
| Listeria_monocytogenes_HCC23_552536                      | Listeria_ivanovii_FSL_F6-596_702454 | 0.7959 |
| Listeria_monocytogenes_FSL_R2-561_393126                 | Listeria_ivanovii_FSL_F6-596_702454 | 0.8132 |
| Listeria_monocytogenes_FSL_J1-208_393119                 | Listeria_ivanovii_FSL_F6-596_702454 | 0.8071 |
| Listeria_monocytogenes_FSL_J1-175_393118                 | Listeria_ivanovii_FSL_F6-596_702454 | 0.8174 |
| Listeria_monocytogenes_Finland_1998_393127               | Listeria_ivanovii_FSL_F6-596_702454 | 0.8272 |
| Listeria_monocytogenes_EGD-e_169963_v1                   | Listeria_ivanovii_FSL_F6-596_702454 | 0.8152 |
| Listeria_monocytogenes_EGD-e_169963                      | Listeria_ivanovii_FSL_F6-596_702454 | 0.8152 |
| Listeria_monocytogenes_EGD_1334565                       | Listeria_ivanovii_FSL_F6-596_702454 | 0.8165 |
| Listeria_monocytogenes_CFSAN002349_1299895               | Listeria_ivanovii_FSL_F6-596_702454 | 0.8281 |
| Listeria_monocytogenes_ATCC_19117_882095_v1              | Listeria_ivanovii_FSL_F6-596_702454 | 0.8233 |
| Listeria_monocytogenes_ATCC_19117_882095                 | Listeria_ivanovii_FSL_F6-596_702454 | 0.8233 |
| Listeria_monocytogenes_6179_1288295                      | Listeria_ivanovii_FSL_F6-596_702454 | 0.8061 |
| Listeria_monocytogenes_1639_v9                           | Listeria_ivanovii_FSL_F6-596_702454 | 0.8006 |
| Listeria_monocytogenes_1639_v99                          | Listeria_ivanovii_FSL_F6-596_702454 | 0.8196 |
| Listeria_monocytogenes_1639_v98                          | Listeria_ivanovii_FSL_F6-596_702454 | 0.8138 |
| Listeria_monocytogenes_1639_v97                          | Listeria_ivanovii_FSL_F6-596_702454 | 0.8273 |
| Listeria_monocytogenes_1639_v96                          | Listeria_ivanovii_FSL_F6-596_702454 | 0.8186 |
| Listeria_monocytogenes_1639_v95                          | Listeria_ivanovii_FSL_F6-596_702454 | 0.8186 |
| Listeria_monocytogenes_1639_v94                          | Listeria_ivanovii_FSL_F6-596_702454 | 0.8193 |
| Listeria_monocytogenes_1639_v93                          | Listeria_ivanovii_FSL_F6-596_702454 | 0.8038 |
| Listeria_monocytogenes_1639_v92                          | Listeria_ivanovii_FSL_F6-596_702454 | 0.82   |

[illegible]

[illegible]



|                                                          |                                         |        |
|----------------------------------------------------------|-----------------------------------------|--------|
| Listeria_monocytogenes_1639_v106                         | Listeria_ivanovii_FSL_F6-596_702454     | 0.8223 |
| Listeria_monocytogenes_1639_v105                         | Listeria_ivanovii_FSL_F6-596_702454     | 0.8227 |
| Listeria_monocytogenes_1639_v104                         | Listeria_ivanovii_FSL_F6-596_702454     | 0.8223 |
| Listeria_monocytogenes_1639_v103                         | Listeria_ivanovii_FSL_F6-596_702454     | 0.8226 |
| Listeria_monocytogenes_1639_v102                         | Listeria_ivanovii_FSL_F6-596_702454     | 0.8174 |
| Listeria_monocytogenes_1639_v101                         | Listeria_ivanovii_FSL_F6-596_702454     | 0.8076 |
| Listeria_monocytogenes_1639_v100                         | Listeria_ivanovii_FSL_F6-596_702454     | 0.807  |
| Listeria_monocytogenes_1639                              | Listeria_ivanovii_FSL_F6-596_702454     | 0.8251 |
| Listeria_monocytogenes_10403S_393133                     | Listeria_ivanovii_FSL_F6-596_702454     | 0.8191 |
| Listeria_monocytogenes_08-5923_637381                    | Listeria_ivanovii_FSL_F6-596_702454     | 0.8081 |
| Listeria_monocytogenes_08-5578_653938                    | Listeria_ivanovii_FSL_F6-596_702454     | 0.7965 |
| Listeria_monocytogenes_07PF0776_1126011                  | Listeria_ivanovii_FSL_F6-596_702454     | 0.827  |
| Listeria_marthii_FSL_S4-120_702457                       | Listeria_ivanovii_FSL_F6-596_702454     | 0.7675 |
| Listeria_marthii_529731_v1                               | Listeria_ivanovii_FSL_F6-596_702454     | 0.7941 |
| Listeria_marthii_529731                                  | Listeria_ivanovii_FSL_F6-596_702454     | 0.7989 |
| Listeria_ivanovii_WSLC3009_1457190                       | Listeria_ivanovii_FSL_F6-596_702454     | 0.8331 |
| Listeria_ivanovii_subsp_londoniensis_202752_v2           | Listeria_ivanovii_FSL_F6-596_702454     | 0.9073 |
| Listeria_ivanovii_subsp_londoniensis_202752_v1           | Listeria_ivanovii_FSL_F6-596_702454     | 0.8719 |
| Listeria_ivanovii_subsp_londoniensis_202752              | Listeria_ivanovii_FSL_F6-596_702454     | 0.9234 |
| Listeria_ivanovii_subsp_ivanovii_PAM_55_881621           | Listeria_ivanovii_FSL_F6-596_702454     | 0.8326 |
| Listeria_ivanovii_subsp_ivanovii_202751_v2               | Listeria_ivanovii_FSL_F6-596_702454     | 0.8334 |
| Listeria_ivanovii_subsp_ivanovii_202751_v1               | Listeria_ivanovii_FSL_F6-596_702454     | 0.8334 |
| Listeria_ivanovii_subsp_ivanovii_202751                  | Listeria_ivanovii_FSL_F6-596_702454     | 0.8334 |
| Listeria_ivanovii_FSL_F6-596_702454                      | Listeria_ivanovii_FSL_F6-596_702454     | 0.0514 |
| Listeria_welshimeri_1643                                 | Listeria_ivanovii_subsp_ivanovii_202751 | 0.8618 |
| Listeria_welshimeri_serovar_6b_str_SLCC5334_386043       | Listeria_ivanovii_subsp_ivanovii_202751 | 0.8612 |
| Listeria_seeligeri_serovar_1_2b_str_SLCC3954_683837      | Listeria_ivanovii_subsp_ivanovii_202751 | 0.8826 |
| Listeria_seeligeri_FSL_S4-171_702452                     | Listeria_ivanovii_subsp_ivanovii_202751 | 0.8191 |
| Listeria_seeligeri_FSL_N1-067_702453                     | Listeria_ivanovii_subsp_ivanovii_202751 | 0.8253 |
| Listeria_seeligeri_1640_v1                               | Listeria_ivanovii_subsp_ivanovii_202751 | 0.891  |
| Listeria_seeligeri_1640                                  | Listeria_ivanovii_subsp_ivanovii_202751 | 0.8765 |
| Listeria_monocytogenes_WSLC1042_1457188                  | Listeria_ivanovii_subsp_ivanovii_202751 | 0.8983 |
| Listeria_monocytogenes_WSLC1001_1457187                  | Listeria_ivanovii_subsp_ivanovii_202751 | 0.8815 |
| Listeria_monocytogenes_SLCC7179_879090                   | Listeria_ivanovii_subsp_ivanovii_202751 | 0.8889 |
| Listeria_monocytogenes_SLCC5850_882096                   | Listeria_ivanovii_subsp_ivanovii_202751 | 0.8863 |
| Listeria_monocytogenes_SLCC2755_932919                   | Listeria_ivanovii_subsp_ivanovii_202751 | 0.888  |
| Listeria_monocytogenes_SLCC2540_879089                   | Listeria_ivanovii_subsp_ivanovii_202751 | 0.8906 |
| Listeria_monocytogenes_SLCC2479_882020                   | Listeria_ivanovii_subsp_ivanovii_202751 | 0.8797 |
| Listeria_monocytogenes_SLCC2378_879088                   | Listeria_ivanovii_subsp_ivanovii_202751 | 0.8997 |
| Listeria_monocytogenes_SLCC2376_882097                   | Listeria_ivanovii_subsp_ivanovii_202751 | 0.8975 |
| Listeria_monocytogenes_SLCC2372_932920                   | Listeria_ivanovii_subsp_ivanovii_202751 | 0.8724 |
| Listeria_monocytogenes_serotype_4b_str_LL195_1230340     | Listeria_ivanovii_subsp_ivanovii_202751 | 0.9056 |
| Listeria_monocytogenes_serotype_4b_str_LIS0087_1134669   | Listeria_ivanovii_subsp_ivanovii_202751 | 0.8622 |
| Listeria_monocytogenes_serotype_4b_str_F2365_265669      | Listeria_ivanovii_subsp_ivanovii_202751 | 0.9056 |
| Listeria_monocytogenes_serotype_4b_str_CLIP_80459_568819 | Listeria_ivanovii_subsp_ivanovii_202751 | 0.9043 |
| Listeria_monocytogenes_serotype_4b_str_81-0861_1196161   | Listeria_ivanovii_subsp_ivanovii_202751 | 0.8887 |
| Listeria_monocytogenes_serotype_4b_str_81-0592_1196160   | Listeria_ivanovii_subsp_ivanovii_202751 | 0.8897 |
| Listeria_monocytogenes_serotype_4b_str_81-0558_1196159   | Listeria_ivanovii_subsp_ivanovii_202751 | 0.8908 |
| Listeria_monocytogenes_serotype_4b_str_10-0809_1196162   | Listeria_ivanovii_subsp_ivanovii_202751 | 0.8901 |
| Listeria_monocytogenes_serotype_4b_str_02-6680_1196175   | Listeria_ivanovii_subsp_ivanovii_202751 | 0.9026 |
| Listeria_monocytogenes_serotype_4b_str_02-6679_1196174   | Listeria_ivanovii_subsp_ivanovii_202751 | 0.9026 |
| Listeria_monocytogenes_serotype_4b_str_02-1792_1196173   | Listeria_ivanovii_subsp_ivanovii_202751 | 0.8904 |
| Listeria_monocytogenes_serotype_4b_str_02-1289_1196172   | Listeria_ivanovii_subsp_ivanovii_202751 | 0.8904 |
| Listeria_monocytogenes_serotype_4b_str_02-1103_1196171   | Listeria_ivanovii_subsp_ivanovii_202751 | 0.8904 |
| Listeria_monocytogenes_serotype_3c_str_10-5027_1196195   | Listeria_ivanovii_subsp_ivanovii_202751 | 0.8785 |
| Listeria_monocytogenes_serotype_1_2c_str_10-5026_1196194 | Listeria_ivanovii_subsp_ivanovii_202751 | 0.8797 |
| Listeria_monocytogenes_serotype_1_2c_str_10-5025_1196193 | Listeria_ivanovii_subsp_ivanovii_202751 | 0.8797 |
| Listeria_monocytogenes_serotype_1_2b_str_10-0811_1196164 | Listeria_ivanovii_subsp_ivanovii_202751 | 0.8795 |
| Listeria_monocytogenes_serotype_1_2b_str_10-0810_1196163 | Listeria_ivanovii_subsp_ivanovii_202751 | 0.8795 |
| Listeria_monocytogenes_serotype_1_2a_str_99-6370_1196179 | Listeria_ivanovii_subsp_ivanovii_202751 | 0.866  |
| Listeria_monocytogenes_serotype_1_2a_str_98-2035_1196178 | Listeria_ivanovii_subsp_ivanovii_202751 | 0.866  |
| Listeria_monocytogenes_serotype_1_2a_str_95-0093_1196177 | Listeria_ivanovii_subsp_ivanovii_202751 | 0.8711 |
| Listeria_monocytogenes_serotype_1_2a_str_88-0478_1196176 | Listeria_ivanovii_subsp_ivanovii_202751 | 0.8703 |
| Listeria_monocytogenes_serotype_1_2a_str_10-5024_1196192 | Listeria_ivanovii_subsp_ivanovii_202751 | 0.8715 |
| Listeria_monocytogenes_serotype_1_2a_str_10-4758_1196168 | Listeria_ivanovii_subsp_ivanovii_202751 | 0.8857 |
| Listeria_monocytogenes_serotype_1_2a_str_10-4754_1196167 | Listeria_ivanovii_subsp_ivanovii_202751 | 0.8857 |
| Listeria_monocytogenes_serotype_1_2a_str_10-1321_1196191 | Listeria_ivanovii_subsp_ivanovii_202751 | 0.8715 |
| Listeria_monocytogenes_serotype_1_2a_str_10-1047_1196190 | Listeria_ivanovii_subsp_ivanovii_202751 | 0.8718 |
| Listeria_monocytogenes_serotype_1_2a_str_10-1046_1196189 | Listeria_ivanovii_subsp_ivanovii_202751 | 0.8718 |
| Listeria_monocytogenes_serotype_1_2a_str_10-0934_1196170 | Listeria_ivanovii_subsp_ivanovii_202751 | 0.8959 |
| Listeria_monocytogenes_serotype_1_2a_str_10-0933_1196169 | Listeria_ivanovii_subsp_ivanovii_202751 | 0.8959 |
| Listeria_monocytogenes_serotype_1_2a_str_10-0815_1196188 | Listeria_ivanovii_subsp_ivanovii_202751 | 0.8673 |
| Listeria_monocytogenes_serotype_1_2a_str_10-0814_1196187 | Listeria_ivanovii_subsp_ivanovii_202751 | 0.8715 |
| Listeria_monocytogenes_serotype_1_2a_str_10-0813_1196166 | Listeria_ivanovii_subsp_ivanovii_202751 | 0.8789 |
| Listeria_monocytogenes_serotype_1_2a_str_10-0812_1196165 | Listeria_ivanovii_subsp_ivanovii_202751 | 0.8789 |
| Listeria_monocytogenes_serotype_1_2a_str_08-7669_1196186 | Listeria_ivanovii_subsp_ivanovii_202751 | 0.8797 |
| Listeria_monocytogenes_serotype_1_2a_str_08-7374_1196185 | Listeria_ivanovii_subsp_ivanovii_202751 | 0.8715 |
| Listeria_monocytogenes_serotype_1_2a_str_08-6997_1196184 | Listeria_ivanovii_subsp_ivanovii_202751 | 0.8673 |
| Listeria_monocytogenes_serotype_1_2a_str_08-6569_1196183 | Listeria_ivanovii_subsp_ivanovii_202751 | 0.8673 |
| Listeria_monocytogenes_serotype_1_2a_str_08-6056_1196182 | Listeria_ivanovii_subsp_ivanovii_202751 | 0.8673 |
| Listeria_monocytogenes_serotype_1_2a_str_04-5457_1196181 | Listeria_ivanovii_subsp_ivanovii_202751 | 0.8715 |
| Listeria_monocytogenes_serotype_1_2a_str_02-5993_1196180 | Listeria_ivanovii_subsp_ivanovii_202751 | 0.8711 |
| Listeria_monocytogenes_R479a_1437838                     | Listeria_ivanovii_subsp_ivanovii_202751 | 0.8709 |
| Listeria_monocytogenes_N53-1_1234142                     | Listeria_ivanovii_subsp_ivanovii_202751 | 0.8499 |
| Listeria_monocytogenes_M7_1030009                        | Listeria_ivanovii_subsp_ivanovii_202751 | 0.8608 |
| Listeria_monocytogenes_LO28_393132                       | Listeria_ivanovii_subsp_ivanovii_202751 | 0.8784 |
| Listeria_monocytogenes_L99_563174                        | Listeria_ivanovii_subsp_ivanovii_202751 | 0.8615 |
| Listeria_monocytogenes_L312_882094                       | Listeria_ivanovii_subsp_ivanovii_202751 | 0.9043 |
| Listeria_monocytogenes_J1816_930781                      | Listeria_ivanovii_subsp_ivanovii_202751 | 0.8815 |
| Listeria_monocytogenes_J1-220_930782                     | Listeria_ivanovii_subsp_ivanovii_202751 | 0.8789 |
| Listeria_monocytogenes_J0161_393130                      | Listeria_ivanovii_subsp_ivanovii_202751 | 0.8784 |

[illegible]

[illegible]

|                                                          |                                            |        |
|----------------------------------------------------------|--------------------------------------------|--------|
| Listeria_monocytogenes_1639_v125                         | Listeria_ivanovii_subsp_ivanovii_202751    | 0.8885 |
| Listeria_monocytogenes_1639_v124                         | Listeria_ivanovii_subsp_ivanovii_202751    | 0.8882 |
| Listeria_monocytogenes_1639_v123                         | Listeria_ivanovii_subsp_ivanovii_202751    | 0.9    |
| Listeria_monocytogenes_1639_v122                         | Listeria_ivanovii_subsp_ivanovii_202751    | 0.9003 |
| Listeria_monocytogenes_1639_v121                         | Listeria_ivanovii_subsp_ivanovii_202751    | 0.9003 |
| Listeria_monocytogenes_1639_v120                         | Listeria_ivanovii_subsp_ivanovii_202751    | 0.9    |
| Listeria_monocytogenes_1639_v11                          | Listeria_ivanovii_subsp_ivanovii_202751    | 0.8592 |
| Listeria_monocytogenes_1639_v119                         | Listeria_ivanovii_subsp_ivanovii_202751    | 0.9003 |
| Listeria_monocytogenes_1639_v118                         | Listeria_ivanovii_subsp_ivanovii_202751    | 0.9003 |
| Listeria_monocytogenes_1639_v117                         | Listeria_ivanovii_subsp_ivanovii_202751    | 0.8862 |
| Listeria_monocytogenes_1639_v116                         | Listeria_ivanovii_subsp_ivanovii_202751    | 0.899  |
| Listeria_monocytogenes_1639_v115                         | Listeria_ivanovii_subsp_ivanovii_202751    | 0.8993 |
| Listeria_monocytogenes_1639_v114                         | Listeria_ivanovii_subsp_ivanovii_202751    | 0.8798 |
| Listeria_monocytogenes_1639_v113                         | Listeria_ivanovii_subsp_ivanovii_202751    | 0.8946 |
| Listeria_monocytogenes_1639_v112                         | Listeria_ivanovii_subsp_ivanovii_202751    | 0.8948 |
| Listeria_monocytogenes_1639_v111                         | Listeria_ivanovii_subsp_ivanovii_202751    | 0.8914 |
| Listeria_monocytogenes_1639_v110                         | Listeria_ivanovii_subsp_ivanovii_202751    | 0.8796 |
| Listeria_monocytogenes_1639_v10                          | Listeria_ivanovii_subsp_ivanovii_202751    | 0.8641 |
| Listeria_monocytogenes_1639_v109                         | Listeria_ivanovii_subsp_ivanovii_202751    | 0.8792 |
| Listeria_monocytogenes_1639_v108                         | Listeria_ivanovii_subsp_ivanovii_202751    | 0.8886 |
| Listeria_monocytogenes_1639_v107                         | Listeria_ivanovii_subsp_ivanovii_202751    | 0.8964 |
| Listeria_monocytogenes_1639_v106                         | Listeria_ivanovii_subsp_ivanovii_202751    | 0.8968 |
| Listeria_monocytogenes_1639_v105                         | Listeria_ivanovii_subsp_ivanovii_202751    | 0.8968 |
| Listeria_monocytogenes_1639_v104                         | Listeria_ivanovii_subsp_ivanovii_202751    | 0.8972 |
| Listeria_monocytogenes_1639_v103                         | Listeria_ivanovii_subsp_ivanovii_202751    | 0.8972 |
| Listeria_monocytogenes_1639_v102                         | Listeria_ivanovii_subsp_ivanovii_202751    | 0.8817 |
| Listeria_monocytogenes_1639_v101                         | Listeria_ivanovii_subsp_ivanovii_202751    | 0.8709 |
| Listeria_monocytogenes_1639_v100                         | Listeria_ivanovii_subsp_ivanovii_202751    | 0.8703 |
| Listeria_monocytogenes_1639                              | Listeria_ivanovii_subsp_ivanovii_202751    | 0.8969 |
| Listeria_monocytogenes_10403S_393133                     | Listeria_ivanovii_subsp_ivanovii_202751    | 0.8892 |
| Listeria_monocytogenes_08-5923_637381                    | Listeria_ivanovii_subsp_ivanovii_202751    | 0.8715 |
| Listeria_monocytogenes_08-5578_653938                    | Listeria_ivanovii_subsp_ivanovii_202751    | 0.8583 |
| Listeria_monocytogenes_07PF0776_1126011                  | Listeria_ivanovii_subsp_ivanovii_202751    | 0.9033 |
| Listeria_marthii_FSL_S4-120_702457                       | Listeria_ivanovii_subsp_ivanovii_202751    | 0.8275 |
| Listeria_marthii_529731_v1                               | Listeria_ivanovii_subsp_ivanovii_202751    | 0.8638 |
| Listeria_marthii_529731                                  | Listeria_ivanovii_subsp_ivanovii_202751    | 0.8734 |
| Listeria_ivanovii_WSLC3009_1457190                       | Listeria_ivanovii_subsp_ivanovii_202751    | 0.9992 |
| Listeria_ivanovii_subsp_londoniensis_202752_v2           | Listeria_ivanovii_subsp_ivanovii_202751    | 0.902  |
| Listeria_ivanovii_subsp_londoniensis_202752_v1           | Listeria_ivanovii_subsp_ivanovii_202751    | 0.8907 |
| Listeria_ivanovii_subsp_londoniensis_202752              | Listeria_ivanovii_subsp_ivanovii_202751    | 0.8974 |
| Listeria_ivanovii_subsp_ivanovii_PAM_55_881621           | Listeria_ivanovii_subsp_ivanovii_202751    | 0.9954 |
| Listeria_ivanovii_subsp_ivanovii_202751_v2               | Listeria_ivanovii_subsp_ivanovii_202751    | 1      |
| Listeria_ivanovii_subsp_ivanovii_202751_v1               | Listeria_ivanovii_subsp_ivanovii_202751    | 1      |
| Listeria_ivanovii_subsp_ivanovii_202751                  | Listeria_ivanovii_subsp_ivanovii_202751    | 0.0628 |
| Listeria_welshimeri_1643                                 | Listeria_ivanovii_subsp_ivanovii_202751_v1 | 0.8618 |
| Listeria_welshimeri_serovar_6b_str_SLCC5334_386043       | Listeria_ivanovii_subsp_ivanovii_202751_v1 | 0.8612 |
| Listeria_seeligeri_serovar_1_2b_str_SLCC3954_683837      | Listeria_ivanovii_subsp_ivanovii_202751_v1 | 0.8826 |
| Listeria_seeligeri_FSL_S4-171_702452                     | Listeria_ivanovii_subsp_ivanovii_202751_v1 | 0.8191 |
| Listeria_seeligeri_FSL_N1-067_702453                     | Listeria_ivanovii_subsp_ivanovii_202751_v1 | 0.8253 |
| Listeria_seeligeri_1640_v1                               | Listeria_ivanovii_subsp_ivanovii_202751_v1 | 0.891  |
| Listeria_seeligeri_1640                                  | Listeria_ivanovii_subsp_ivanovii_202751_v1 | 0.8765 |
| Listeria_monocytogenes_WSLC1042_1457188                  | Listeria_ivanovii_subsp_ivanovii_202751_v1 | 0.8983 |
| Listeria_monocytogenes_WSLC1001_1457187                  | Listeria_ivanovii_subsp_ivanovii_202751_v1 | 0.8815 |
| Listeria_monocytogenes_SLCC7179_879090                   | Listeria_ivanovii_subsp_ivanovii_202751_v1 | 0.8889 |
| Listeria_monocytogenes_SLCC5850_882096                   | Listeria_ivanovii_subsp_ivanovii_202751_v1 | 0.8863 |
| Listeria_monocytogenes_SLCC2755_932919                   | Listeria_ivanovii_subsp_ivanovii_202751_v1 | 0.888  |
| Listeria_monocytogenes_SLCC2540_879089                   | Listeria_ivanovii_subsp_ivanovii_202751_v1 | 0.8906 |
| Listeria_monocytogenes_SLCC2479_882020                   | Listeria_ivanovii_subsp_ivanovii_202751_v1 | 0.8797 |
| Listeria_monocytogenes_SLCC2378_879088                   | Listeria_ivanovii_subsp_ivanovii_202751_v1 | 0.8997 |
| Listeria_monocytogenes_SLCC2376_882097                   | Listeria_ivanovii_subsp_ivanovii_202751_v1 | 0.8975 |
| Listeria_monocytogenes_SLCC2372_932920                   | Listeria_ivanovii_subsp_ivanovii_202751_v1 | 0.8724 |
| Listeria_monocytogenes_serotype_4b_str_LL195_1230340     | Listeria_ivanovii_subsp_ivanovii_202751_v1 | 0.9056 |
| Listeria_monocytogenes_serotype_4b_str_LIS0087_1134669   | Listeria_ivanovii_subsp_ivanovii_202751_v1 | 0.8622 |
| Listeria_monocytogenes_serotype_4b_str_F2365_265669      | Listeria_ivanovii_subsp_ivanovii_202751_v1 | 0.9056 |
| Listeria_monocytogenes_serotype_4b_str_CLIP_80459_568819 | Listeria_ivanovii_subsp_ivanovii_202751_v1 | 0.9043 |
| Listeria_monocytogenes_serotype_4b_str_81-0861_1196161   | Listeria_ivanovii_subsp_ivanovii_202751_v1 | 0.8887 |
| Listeria_monocytogenes_serotype_4b_str_81-0592_1196160   | Listeria_ivanovii_subsp_ivanovii_202751_v1 | 0.8897 |
| Listeria_monocytogenes_serotype_4b_str_81-0558_1196159   | Listeria_ivanovii_subsp_ivanovii_202751_v1 | 0.8908 |
| Listeria_monocytogenes_serotype_4b_str_10-0809_1196162   | Listeria_ivanovii_subsp_ivanovii_202751_v1 | 0.8901 |
| Listeria_monocytogenes_serotype_4b_str_02-6680_1196175   | Listeria_ivanovii_subsp_ivanovii_202751_v1 | 0.9026 |
| Listeria_monocytogenes_serotype_4b_str_02-6679_1196174   | Listeria_ivanovii_subsp_ivanovii_202751_v1 | 0.9026 |
| Listeria_monocytogenes_serotype_4b_str_02-1792_1196173   | Listeria_ivanovii_subsp_ivanovii_202751_v1 | 0.8904 |
| Listeria_monocytogenes_serotype_4b_str_02-1289_1196172   | Listeria_ivanovii_subsp_ivanovii_202751_v1 | 0.8904 |
| Listeria_monocytogenes_serotype_4b_str_02-1103_1196171   | Listeria_ivanovii_subsp_ivanovii_202751_v1 | 0.8904 |
| Listeria_monocytogenes_serotype_3c_str_10-5027_1196195   | Listeria_ivanovii_subsp_ivanovii_202751_v1 | 0.8785 |
| Listeria_monocytogenes_serotype_1_2c_str_10-5026_1196194 | Listeria_ivanovii_subsp_ivanovii_202751_v1 | 0.8797 |
| Listeria_monocytogenes_serotype_1_2c_str_10-5025_1196193 | Listeria_ivanovii_subsp_ivanovii_202751_v1 | 0.8797 |
| Listeria_monocytogenes_serotype_1_2b_str_10-0811_1196164 | Listeria_ivanovii_subsp_ivanovii_202751_v1 | 0.8795 |
| Listeria_monocytogenes_serotype_1_2b_str_10-0810_1196163 | Listeria_ivanovii_subsp_ivanovii_202751_v1 | 0.8795 |
| Listeria_monocytogenes_serotype_1_2a_str_99-6370_1196179 | Listeria_ivanovii_subsp_ivanovii_202751_v1 | 0.866  |
| Listeria_monocytogenes_serotype_1_2a_str_98-2035_1196178 | Listeria_ivanovii_subsp_ivanovii_202751_v1 | 0.866  |
| Listeria_monocytogenes_serotype_1_2a_str_95-0093_1196177 | Listeria_ivanovii_subsp_ivanovii_202751_v1 | 0.8711 |
| Listeria_monocytogenes_serotype_1_2a_str_88-0478_1196176 | Listeria_ivanovii_subsp_ivanovii_202751_v1 | 0.8703 |
| Listeria_monocytogenes_serotype_1_2a_str_10-5024_1196192 | Listeria_ivanovii_subsp_ivanovii_202751_v1 | 0.8715 |
| Listeria_monocytogenes_serotype_1_2a_str_10-4758_1196168 | Listeria_ivanovii_subsp_ivanovii_202751_v1 | 0.8857 |
| Listeria_monocytogenes_serotype_1_2a_str_10-4754_1196167 | Listeria_ivanovii_subsp_ivanovii_202751_v1 | 0.8857 |
| Listeria_monocytogenes_serotype_1_2a_str_10-1321_1196191 | Listeria_ivanovii_subsp_ivanovii_202751_v1 | 0.8715 |
| Listeria_monocytogenes_serotype_1_2a_str_10-1047_1196190 | Listeria_ivanovii_subsp_ivanovii_202751_v1 | 0.8718 |
| Listeria_monocytogenes_serotype_1_2a_str_10-1046_1196189 | Listeria_ivanovii_subsp_ivanovii_202751_v1 | 0.8718 |
| Listeria_monocytogenes_serotype_1_2a_str_10-0934_1196170 | Listeria_ivanovii_subsp_ivanovii_202751_v1 | 0.8959 |
| Listeria_monocytogenes_serotype_1_2a_str_10-0933_1196169 | Listeria_ivanovii_subsp_ivanovii_202751_v1 | 0.8959 |

|                                                          |                                            |        |
|----------------------------------------------------------|--------------------------------------------|--------|
| Listeria_monocytogenes_serotype_1_2a_str_10-0815_1196188 | Listeria_ivanovii_subsp_ivanovii_202751_v1 | 0.8673 |
| Listeria_monocytogenes_serotype_1_2a_str_10-0814_1196187 | Listeria_ivanovii_subsp_ivanovii_202751_v1 | 0.8715 |
| Listeria_monocytogenes_serotype_1_2a_str_10-0813_1196166 | Listeria_ivanovii_subsp_ivanovii_202751_v1 | 0.8789 |
| Listeria_monocytogenes_serotype_1_2a_str_10-0812_1196165 | Listeria_ivanovii_subsp_ivanovii_202751_v1 | 0.8789 |
| Listeria_monocytogenes_serotype_1_2a_str_08-7669_1196186 | Listeria_ivanovii_subsp_ivanovii_202751_v1 | 0.8797 |
| Listeria_monocytogenes_serotype_1_2a_str_08-7374_1196185 | Listeria_ivanovii_subsp_ivanovii_202751_v1 | 0.8715 |
| Listeria_monocytogenes_serotype_1_2a_str_08-6997_1196184 | Listeria_ivanovii_subsp_ivanovii_202751_v1 | 0.8673 |
| Listeria_monocytogenes_serotype_1_2a_str_08-6569_1196183 | Listeria_ivanovii_subsp_ivanovii_202751_v1 | 0.8673 |
| Listeria_monocytogenes_serotype_1_2a_str_08-6056_1196182 | Listeria_ivanovii_subsp_ivanovii_202751_v1 | 0.8715 |
| Listeria_monocytogenes_serotype_1_2a_str_04-5457_1196181 | Listeria_ivanovii_subsp_ivanovii_202751_v1 | 0.8711 |
| Listeria_monocytogenes_serotype_1_2a_str_02-5993_1196180 | Listeria_ivanovii_subsp_ivanovii_202751_v1 | 0.8709 |
| Listeria_monocytogenes_R479a_1437838                     | Listeria_ivanovii_subsp_ivanovii_202751_v1 | 0.8499 |
| Listeria_monocytogenes_N53-1_1234142                     | Listeria_ivanovii_subsp_ivanovii_202751_v1 | 0.8608 |
| Listeria_monocytogenes_M7_1030009                        | Listeria_ivanovii_subsp_ivanovii_202751_v1 | 0.8784 |
| Listeria_monocytogenes_LO28_393132                       | Listeria_ivanovii_subsp_ivanovii_202751_v1 | 0.8615 |
| Listeria_monocytogenes_L99_563174                        | Listeria_ivanovii_subsp_ivanovii_202751_v1 | 0.9043 |
| Listeria_monocytogenes_L312_882094                       | Listeria_ivanovii_subsp_ivanovii_202751_v1 | 0.8815 |
| Listeria_monocytogenes_J1816_930781                      | Listeria_ivanovii_subsp_ivanovii_202751_v1 | 0.8789 |
| Listeria_monocytogenes_J1-220_930782                     | Listeria_ivanovii_subsp_ivanovii_202751_v1 | 0.8784 |
| Listeria_monocytogenes_J0161_393130                      | Listeria_ivanovii_subsp_ivanovii_202751_v1 | 0.8612 |
| Listeria_monocytogenes_HCC23_552536                      | Listeria_ivanovii_subsp_ivanovii_202751_v1 | 0.878  |
| Listeria_monocytogenes_FSL_R2-561_393126                 | Listeria_ivanovii_subsp_ivanovii_202751_v1 | 0.8744 |
| Listeria_monocytogenes_FSL_J1-208_393119                 | Listeria_ivanovii_subsp_ivanovii_202751_v1 | 0.8948 |
| Listeria_monocytogenes_FSL_J1-175_393118                 | Listeria_ivanovii_subsp_ivanovii_202751_v1 | 0.897  |
| Listeria_monocytogenes_Finland_1998_393127               | Listeria_ivanovii_subsp_ivanovii_202751_v1 | 0.8863 |
| Listeria_monocytogenes_EGD-e_169963_v1                   | Listeria_ivanovii_subsp_ivanovii_202751_v1 | 0.8867 |
| Listeria_monocytogenes_EGD-e_169963                      | Listeria_ivanovii_subsp_ivanovii_202751_v1 | 0.8867 |
| Listeria_monocytogenes_EGD_1334565                       | Listeria_ivanovii_subsp_ivanovii_202751_v1 | 0.9    |
| Listeria_monocytogenes_CFSAN002349_1299895               | Listeria_ivanovii_subsp_ivanovii_202751_v1 | 0.8978 |
| Listeria_monocytogenes_ATCC_19117_882095_v1              | Listeria_ivanovii_subsp_ivanovii_202751_v1 | 0.8978 |
| Listeria_monocytogenes_ATCC_19117_882095                 | Listeria_ivanovii_subsp_ivanovii_202751_v1 | 0.8629 |
| Listeria_monocytogenes_6179_1288295                      | Listeria_ivanovii_subsp_ivanovii_202751_v1 | 0.8674 |
| Listeria_monocytogenes_1639_v9                           | Listeria_ivanovii_subsp_ivanovii_202751_v1 | 0.8815 |
| Listeria_monocytogenes_1639_v99                          | Listeria_ivanovii_subsp_ivanovii_202751_v1 | 0.8771 |
| Listeria_monocytogenes_1639_v98                          | Listeria_ivanovii_subsp_ivanovii_202751_v1 | 0.8931 |
| Listeria_monocytogenes_1639_v97                          | Listeria_ivanovii_subsp_ivanovii_202751_v1 | 0.8808 |
| Listeria_monocytogenes_1639_v96                          | Listeria_ivanovii_subsp_ivanovii_202751_v1 | 0.8809 |
| Listeria_monocytogenes_1639_v95                          | Listeria_ivanovii_subsp_ivanovii_202751_v1 | 0.8808 |
| Listeria_monocytogenes_1639_v94                          | Listeria_ivanovii_subsp_ivanovii_202751_v1 | 0.8737 |
| Listeria_monocytogenes_1639_v93                          | Listeria_ivanovii_subsp_ivanovii_202751_v1 | 0.8812 |
| Listeria_monocytogenes_1639_v92                          | Listeria_ivanovii_subsp_ivanovii_202751_v1 | 0.8878 |
| Listeria_monocytogenes_1639_v91                          | Listeria_ivanovii_subsp_ivanovii_202751_v1 | 0.8771 |
| Listeria_monocytogenes_1639_v90                          | Listeria_ivanovii_subsp_ivanovii_202751_v1 | 0.8608 |
| Listeria_monocytogenes_1639_v8                           | Listeria_ivanovii_subsp_ivanovii_202751_v1 | 0.8938 |
| Listeria_monocytogenes_1639_v89                          | Listeria_ivanovii_subsp_ivanovii_202751_v1 | 0.8783 |
| Listeria_monocytogenes_1639_v88                          | Listeria_ivanovii_subsp_ivanovii_202751_v1 | 0.8738 |
| Listeria_monocytogenes_1639_v87                          | Listeria_ivanovii_subsp_ivanovii_202751_v1 | 0.8739 |
| Listeria_monocytogenes_1639_v86                          | Listeria_ivanovii_subsp_ivanovii_202751_v1 | 0.888  |
| Listeria_monocytogenes_1639_v85                          | Listeria_ivanovii_subsp_ivanovii_202751_v1 | 0.8802 |
| Listeria_monocytogenes_1639_v84                          | Listeria_ivanovii_subsp_ivanovii_202751_v1 | 0.8873 |
| Listeria_monocytogenes_1639_v83                          | Listeria_ivanovii_subsp_ivanovii_202751_v1 | 0.8866 |
| Listeria_monocytogenes_1639_v82                          | Listeria_ivanovii_subsp_ivanovii_202751_v1 | 0.8786 |
| Listeria_monocytogenes_1639_v81                          | Listeria_ivanovii_subsp_ivanovii_202751_v1 | 0.884  |
| Listeria_monocytogenes_1639_v80                          | Listeria_ivanovii_subsp_ivanovii_202751_v1 | 0.8608 |
| Listeria_monocytogenes_1639_v7                           | Listeria_ivanovii_subsp_ivanovii_202751_v1 | 0.8766 |
| Listeria_monocytogenes_1639_v79                          | Listeria_ivanovii_subsp_ivanovii_202751_v1 | 0.8779 |
| Listeria_monocytogenes_1639_v78                          | Listeria_ivanovii_subsp_ivanovii_202751_v1 | 0.8798 |
| Listeria_monocytogenes_1639_v77                          | Listeria_ivanovii_subsp_ivanovii_202751_v1 | 0.8702 |
| Listeria_monocytogenes_1639_v76                          | Listeria_ivanovii_subsp_ivanovii_202751_v1 | 0.8615 |
| Listeria_monocytogenes_1639_v75                          | Listeria_ivanovii_subsp_ivanovii_202751_v1 | 0.8746 |
| Listeria_monocytogenes_1639_v74                          | Listeria_ivanovii_subsp_ivanovii_202751_v1 | 0.8738 |
| Listeria_monocytogenes_1639_v73                          | Listeria_ivanovii_subsp_ivanovii_202751_v1 | 0.8864 |
| Listeria_monocytogenes_1639_v72                          | Listeria_ivanovii_subsp_ivanovii_202751_v1 | 0.8647 |
| Listeria_monocytogenes_1639_v71                          | Listeria_ivanovii_subsp_ivanovii_202751_v1 | 0.8764 |
| Listeria_monocytogenes_1639_v70                          | Listeria_ivanovii_subsp_ivanovii_202751_v1 | 0.8    |



[illegible]



|                                                          |                                            |        |
|----------------------------------------------------------|--------------------------------------------|--------|
| Listeria_monocytogenes_1639_v143                         | Listeria_ivanovii_subsp_ivanovii_202751_v1 | 0.898  |
| Listeria_monocytogenes_1639_v142                         | Listeria_ivanovii_subsp_ivanovii_202751_v1 | 0.9039 |
| Listeria_monocytogenes_1639_v141                         | Listeria_ivanovii_subsp_ivanovii_202751_v1 | 0.8995 |
| Listeria_monocytogenes_1639_v140                         | Listeria_ivanovii_subsp_ivanovii_202751_v1 | 0.9043 |
| Listeria_monocytogenes_1639_v13                          | Listeria_ivanovii_subsp_ivanovii_202751_v1 | 0.8662 |
| Listeria_monocytogenes_1639_v139                         | Listeria_ivanovii_subsp_ivanovii_202751_v1 | 0.8971 |
| Listeria_monocytogenes_1639_v138                         | Listeria_ivanovii_subsp_ivanovii_202751_v1 | 0.9036 |
| Listeria_monocytogenes_1639_v137                         | Listeria_ivanovii_subsp_ivanovii_202751_v1 | 0.9032 |
| Listeria_monocytogenes_1639_v136                         | Listeria_ivanovii_subsp_ivanovii_202751_v1 | 0.8851 |
| Listeria_monocytogenes_1639_v135                         | Listeria_ivanovii_subsp_ivanovii_202751_v1 | 0.873  |
| Listeria_monocytogenes_1639_v134                         | Listeria_ivanovii_subsp_ivanovii_202751_v1 | 0.8994 |
| Listeria_monocytogenes_1639_v133                         | Listeria_ivanovii_subsp_ivanovii_202751_v1 | 0.8915 |
| Listeria_monocytogenes_1639_v132                         | Listeria_ivanovii_subsp_ivanovii_202751_v1 | 0.8759 |
| Listeria_monocytogenes_1639_v131                         | Listeria_ivanovii_subsp_ivanovii_202751_v1 | 0.8876 |
| Listeria_monocytogenes_1639_v130                         | Listeria_ivanovii_subsp_ivanovii_202751_v1 | 0.8793 |
| Listeria_monocytogenes_1639_v12                          | Listeria_ivanovii_subsp_ivanovii_202751_v1 | 0.8603 |
| Listeria_monocytogenes_1639_v129                         | Listeria_ivanovii_subsp_ivanovii_202751_v1 | 0.9001 |
| Listeria_monocytogenes_1639_v128                         | Listeria_ivanovii_subsp_ivanovii_202751_v1 | 0.8958 |
| Listeria_monocytogenes_1639_v127                         | Listeria_ivanovii_subsp_ivanovii_202751_v1 | 0.8867 |
| Listeria_monocytogenes_1639_v126                         | Listeria_ivanovii_subsp_ivanovii_202751_v1 | 0.8946 |
| Listeria_monocytogenes_1639_v125                         | Listeria_ivanovii_subsp_ivanovii_202751_v1 | 0.8885 |
| Listeria_monocytogenes_1639_v124                         | Listeria_ivanovii_subsp_ivanovii_202751_v1 | 0.8882 |
| Listeria_monocytogenes_1639_v123                         | Listeria_ivanovii_subsp_ivanovii_202751_v1 | 0.9    |
| Listeria_monocytogenes_1639_v122                         | Listeria_ivanovii_subsp_ivanovii_202751_v1 | 0.9003 |
| Listeria_monocytogenes_1639_v121                         | Listeria_ivanovii_subsp_ivanovii_202751_v1 | 0.9003 |
| Listeria_monocytogenes_1639_v120                         | Listeria_ivanovii_subsp_ivanovii_202751_v1 | 0.9    |
| Listeria_monocytogenes_1639_v11                          | Listeria_ivanovii_subsp_ivanovii_202751_v1 | 0.8592 |
| Listeria_monocytogenes_1639_v119                         | Listeria_ivanovii_subsp_ivanovii_202751_v1 | 0.9003 |
| Listeria_monocytogenes_1639_v118                         | Listeria_ivanovii_subsp_ivanovii_202751_v1 | 0.9003 |
| Listeria_monocytogenes_1639_v117                         | Listeria_ivanovii_subsp_ivanovii_202751_v1 | 0.8862 |
| Listeria_monocytogenes_1639_v116                         | Listeria_ivanovii_subsp_ivanovii_202751_v1 | 0.899  |
| Listeria_monocytogenes_1639_v115                         | Listeria_ivanovii_subsp_ivanovii_202751_v1 | 0.8993 |
| Listeria_monocytogenes_1639_v114                         | Listeria_ivanovii_subsp_ivanovii_202751_v1 | 0.8798 |
| Listeria_monocytogenes_1639_v113                         | Listeria_ivanovii_subsp_ivanovii_202751_v1 | 0.8946 |
| Listeria_monocytogenes_1639_v112                         | Listeria_ivanovii_subsp_ivanovii_202751_v1 | 0.8948 |
| Listeria_monocytogenes_1639_v111                         | Listeria_ivanovii_subsp_ivanovii_202751_v1 | 0.8914 |
| Listeria_monocytogenes_1639_v110                         | Listeria_ivanovii_subsp_ivanovii_202751_v1 | 0.8796 |
| Listeria_monocytogenes_1639_v10                          | Listeria_ivanovii_subsp_ivanovii_202751_v1 | 0.8641 |
| Listeria_monocytogenes_1639_v109                         | Listeria_ivanovii_subsp_ivanovii_202751_v1 | 0.8792 |
| Listeria_monocytogenes_1639_v108                         | Listeria_ivanovii_subsp_ivanovii_202751_v1 | 0.8886 |
| Listeria_monocytogenes_1639_v107                         | Listeria_ivanovii_subsp_ivanovii_202751_v1 | 0.8964 |
| Listeria_monocytogenes_1639_v106                         | Listeria_ivanovii_subsp_ivanovii_202751_v1 | 0.8968 |
| Listeria_monocytogenes_1639_v105                         | Listeria_ivanovii_subsp_ivanovii_202751_v1 | 0.8968 |
| Listeria_monocytogenes_1639_v104                         | Listeria_ivanovii_subsp_ivanovii_202751_v1 | 0.8972 |
| Listeria_monocytogenes_1639_v103                         | Listeria_ivanovii_subsp_ivanovii_202751_v1 | 0.8972 |
| Listeria_monocytogenes_1639_v102                         | Listeria_ivanovii_subsp_ivanovii_202751_v1 | 0.8817 |
| Listeria_monocytogenes_1639_v101                         | Listeria_ivanovii_subsp_ivanovii_202751_v1 | 0.8709 |
| Listeria_monocytogenes_1639_v100                         | Listeria_ivanovii_subsp_ivanovii_202751_v1 | 0.8703 |
| Listeria_monocytogenes_1639                              | Listeria_ivanovii_subsp_ivanovii_202751_v1 | 0.8969 |
| Listeria_monocytogenes_10403S_393133                     | Listeria_ivanovii_subsp_ivanovii_202751_v1 | 0.8892 |
| Listeria_monocytogenes_08-5923_637381                    | Listeria_ivanovii_subsp_ivanovii_202751_v1 | 0.8715 |
| Listeria_monocytogenes_08-5578_653938                    | Listeria_ivanovii_subsp_ivanovii_202751_v1 | 0.8583 |
| Listeria_monocytogenes_07PF0776_1126011                  | Listeria_ivanovii_subsp_ivanovii_202751_v1 | 0.9033 |
| Listeria_marthii_FSL_S4-120_702457                       | Listeria_ivanovii_subsp_ivanovii_202751_v1 | 0.8275 |
| Listeria_marthii_529731_v1                               | Listeria_ivanovii_subsp_ivanovii_202751_v1 | 0.8638 |
| Listeria_marthii_529731                                  | Listeria_ivanovii_subsp_ivanovii_202751_v1 | 0.8734 |
| Listeria_ivanovii_WSLC3009_1457190                       | Listeria_ivanovii_subsp_ivanovii_202751_v1 | 0.9992 |
| Listeria_ivanovii_subsp_londoniensis_202752_v2           | Listeria_ivanovii_subsp_ivanovii_202751_v1 | 0.902  |
| Listeria_ivanovii_subsp_londoniensis_202752_v1           | Listeria_ivanovii_subsp_ivanovii_202751_v1 | 0.8907 |
| Listeria_ivanovii_subsp_londoniensis_202752              | Listeria_ivanovii_subsp_ivanovii_202751_v1 | 0.8974 |
| Listeria_ivanovii_subsp_ivanovii_PAM_55_881621           | Listeria_ivanovii_subsp_ivanovii_202751_v1 | 0.9954 |
| Listeria_ivanovii_subsp_ivanovii_202751_v2               | Listeria_ivanovii_subsp_ivanovii_202751_v1 | 1      |
| Listeria_ivanovii_subsp_ivanovii_202751_v1               | Listeria_ivanovii_subsp_ivanovii_202751_v1 | 0.0624 |
| Listeria_welshimeri_1643                                 | Listeria_ivanovii_subsp_ivanovii_202751_v2 | 0.8618 |
| Listeria_welshimeri_serovar_6b_str_SLCC5334_386043       | Listeria_ivanovii_subsp_ivanovii_202751_v2 | 0.8612 |
| Listeria_seeligeri_serovar_1_2b_str_SLCC3954_683837      | Listeria_ivanovii_subsp_ivanovii_202751_v2 | 0.8826 |
| Listeria_seeligeri_FSL_S4-171_702452                     | Listeria_ivanovii_subsp_ivanovii_202751_v2 | 0.8191 |
| Listeria_seeligeri_FSL_N1-067_702453                     | Listeria_ivanovii_subsp_ivanovii_202751_v2 | 0.8253 |
| Listeria_seeligeri_1640_v1                               | Listeria_ivanovii_subsp_ivanovii_202751_v2 | 0.891  |
| Listeria_seeligeri_1640                                  | Listeria_ivanovii_subsp_ivanovii_202751_v2 | 0.8765 |
| Listeria_monocytogenes_WSLC1042_1457188                  | Listeria_ivanovii_subsp_ivanovii_202751_v2 | 0.8983 |
| Listeria_monocytogenes_WSLC1001_1457187                  | Listeria_ivanovii_subsp_ivanovii_202751_v2 | 0.8815 |
| Listeria_monocytogenes_SLCC7179_879090                   | Listeria_ivanovii_subsp_ivanovii_202751_v2 | 0.8889 |
| Listeria_monocytogenes_SLCC5850_882096                   | Listeria_ivanovii_subsp_ivanovii_202751_v2 | 0.8863 |
| Listeria_monocytogenes_SLCC2755_932919                   | Listeria_ivanovii_subsp_ivanovii_202751_v2 | 0.888  |
| Listeria_monocytogenes_SLCC2540_879089                   | Listeria_ivanovii_subsp_ivanovii_202751_v2 | 0.8906 |
| Listeria_monocytogenes_SLCC2479_882020                   | Listeria_ivanovii_subsp_ivanovii_202751_v2 | 0.8797 |
| Listeria_monocytogenes_SLCC2378_879088                   | Listeria_ivanovii_subsp_ivanovii_202751_v2 | 0.8997 |
| Listeria_monocytogenes_SLCC2376_882097                   | Listeria_ivanovii_subsp_ivanovii_202751_v2 | 0.8975 |
| Listeria_monocytogenes_SLCC2372_932920                   | Listeria_ivanovii_subsp_ivanovii_202751_v2 | 0.8724 |
| Listeria_monocytogenes_serotype_4b_str_LL195_1230340     | Listeria_ivanovii_subsp_ivanovii_202751_v2 | 0.9056 |
| Listeria_monocytogenes_serotype_4b_str_LIS0087_1134669   | Listeria_ivanovii_subsp_ivanovii_202751_v2 | 0.8622 |
| Listeria_monocytogenes_serotype_4b_str_F2365_265669      | Listeria_ivanovii_subsp_ivanovii_202751_v2 | 0.9056 |
| Listeria_monocytogenes_serotype_4b_str_CLIP_80459_568819 | Listeria_ivanovii_subsp_ivanovii_202751_v2 | 0.9043 |
| Listeria_monocytogenes_serotype_4b_str_81-0861_1196161   | Listeria_ivanovii_subsp_ivanovii_202751_v2 | 0.8887 |
| Listeria_monocytogenes_serotype_4b_str_81-0592_1196160   | Listeria_ivanovii_subsp_ivanovii_202751_v2 | 0.8897 |
| Listeria_monocytogenes_serotype_4b_str_81-0558_1196159   | Listeria_ivanovii_subsp_ivanovii_202751_v2 | 0.8908 |
| Listeria_monocytogenes_serotype_4b_str_10-0809_1196162   | Listeria_ivanovii_subsp_ivanovii_202751_v2 | 0.8901 |
| Listeria_monocytogenes_serotype_4b_str_02-6680_1196175   | Listeria_ivanovii_subsp_ivanovii_202751_v2 | 0.9026 |
| Listeria_monocytogenes_serotype_4b_str_02-6679_1196174   | Listeria_ivanovii_subsp_ivanovii_202751_v2 | 0.9026 |
| Listeria_monocytogenes_serotype_4b_str_02-1792_1196173   | Listeria_ivanovii_subsp_ivanovii_202751_v2 | 0.8904 |

|                                                          |                                            |        |
|----------------------------------------------------------|--------------------------------------------|--------|
| Listeria_monocytogenes_serotype_4b_str_02-1289_1196172   | Listeria_ivanovii_subsp_ivanovii_202751_v2 | 0.8904 |
| Listeria_monocytogenes_serotype_4b_str_02-1103_1196171   | Listeria_ivanovii_subsp_ivanovii_202751_v2 | 0.8904 |
| Listeria_monocytogenes_serotype_3c_str_10-5027_1196195   | Listeria_ivanovii_subsp_ivanovii_202751_v2 | 0.8785 |
| Listeria_monocytogenes_serotype_1_2c_str_10-5026_1196194 | Listeria_ivanovii_subsp_ivanovii_202751_v2 | 0.8797 |
| Listeria_monocytogenes_serotype_1_2c_str_10-5025_1196193 | Listeria_ivanovii_subsp_ivanovii_202751_v2 | 0.8797 |
| Listeria_monocytogenes_serotype_1_2b_str_10-0811_1196164 | Listeria_ivanovii_subsp_ivanovii_202751_v2 | 0.8795 |
| Listeria_monocytogenes_serotype_1_2b_str_10-0810_1196163 | Listeria_ivanovii_subsp_ivanovii_202751_v2 | 0.8795 |
| Listeria_monocytogenes_serotype_1_2a_str_99-6370_1196179 | Listeria_ivanovii_subsp_ivanovii_202751_v2 | 0.866  |
| Listeria_monocytogenes_serotype_1_2a_str_98-2035_1196178 | Listeria_ivanovii_subsp_ivanovii_202751_v2 | 0.866  |
| Listeria_monocytogenes_serotype_1_2a_str_95-0093_1196177 | Listeria_ivanovii_subsp_ivanovii_202751_v2 | 0.8711 |
| Listeria_monocytogenes_serotype_1_2a_str_88-0478_1196176 | Listeria_ivanovii_subsp_ivanovii_202751_v2 | 0.8703 |
| Listeria_monocytogenes_serotype_1_2a_str_10-5024_1196192 | Listeria_ivanovii_subsp_ivanovii_202751_v2 | 0.8715 |
| Listeria_monocytogenes_serotype_1_2a_str_10-4758_1196168 | Listeria_ivanovii_subsp_ivanovii_202751_v2 | 0.8857 |
| Listeria_monocytogenes_serotype_1_2a_str_10-4754_1196167 | Listeria_ivanovii_subsp_ivanovii_202751_v2 | 0.8857 |
| Listeria_monocytogenes_serotype_1_2a_str_10-1321_1196191 | Listeria_ivanovii_subsp_ivanovii_202751_v2 | 0.8715 |
| Listeria_monocytogenes_serotype_1_2a_str_10-1047_1196190 | Listeria_ivanovii_subsp_ivanovii_202751_v2 | 0.8718 |
| Listeria_monocytogenes_serotype_1_2a_str_10-1046_1196189 | Listeria_ivanovii_subsp_ivanovii_202751_v2 | 0.8718 |
| Listeria_monocytogenes_serotype_1_2a_str_10-0934_1196170 | Listeria_ivanovii_subsp_ivanovii_202751_v2 | 0.8959 |
| Listeria_monocytogenes_serotype_1_2a_str_10-0933_1196169 | Listeria_ivanovii_subsp_ivanovii_202751_v2 | 0.8959 |
| Listeria_monocytogenes_serotype_1_2a_str_10-0815_1196188 | Listeria_ivanovii_subsp_ivanovii_202751_v2 | 0.8673 |
| Listeria_monocytogenes_serotype_1_2a_str_10-0814_1196187 | Listeria_ivanovii_subsp_ivanovii_202751_v2 | 0.8715 |
| Listeria_monocytogenes_serotype_1_2a_str_10-0813_1196166 | Listeria_ivanovii_subsp_ivanovii_202751_v2 | 0.8789 |
| Listeria_monocytogenes_serotype_1_2a_str_10-0812_1196165 | Listeria_ivanovii_subsp_ivanovii_202751_v2 | 0.8789 |
| Listeria_monocytogenes_serotype_1_2a_str_08-7669_1196186 | Listeria_ivanovii_subsp_ivanovii_202751_v2 | 0.8797 |
| Listeria_monocytogenes_serotype_1_2a_str_08-7374_1196185 | Listeria_ivanovii_subsp_ivanovii_202751_v2 | 0.8715 |
| Listeria_monocytogenes_serotype_1_2a_str_08-6997_1196184 | Listeria_ivanovii_subsp_ivanovii_202751_v2 | 0.8673 |
| Listeria_monocytogenes_serotype_1_2a_str_08-6569_1196183 | Listeria_ivanovii_subsp_ivanovii_202751_v2 | 0.8673 |
| Listeria_monocytogenes_serotype_1_2a_str_08-6056_1196182 | Listeria_ivanovii_subsp_ivanovii_202751_v2 | 0.8673 |
| Listeria_monocytogenes_serotype_1_2a_str_04-5457_1196181 | Listeria_ivanovii_subsp_ivanovii_202751_v2 | 0.8715 |
| Listeria_monocytogenes_serotype_1_2a_str_02-5993_1196180 | Listeria_ivanovii_subsp_ivanovii_202751_v2 | 0.8711 |
| Listeria_monocytogenes_R479a_1437838                     | Listeria_ivanovii_subsp_ivanovii_202751_v2 | 0.8709 |
| Listeria_monocytogenes_N53-1_1234142                     | Listeria_ivanovii_subsp_ivanovii_202751_v2 | 0.8499 |
| Listeria_monocytogenes_M7_1030009                        | Listeria_ivanovii_subsp_ivanovii_202751_v2 | 0.8608 |
| Listeria_monocytogenes_LO28_393132                       | Listeria_ivanovii_subsp_ivanovii_202751_v2 | 0.8784 |
| Listeria_monocytogenes_L99_563174                        | Listeria_ivanovii_subsp_ivanovii_202751_v2 | 0.8615 |
| Listeria_monocytogenes_L312_882094                       | Listeria_ivanovii_subsp_ivanovii_202751_v2 | 0.9043 |
| Listeria_monocytogenes_J1816_930781                      | Listeria_ivanovii_subsp_ivanovii_202751_v2 | 0.8815 |
| Listeria_monocytogenes_J1-220_930782                     | Listeria_ivanovii_subsp_ivanovii_202751_v2 | 0.8789 |
| Listeria_monocytogenes_J0161_393130                      | Listeria_ivanovii_subsp_ivanovii_202751_v2 | 0.8784 |
| Listeria_monocytogenes_HCC23_552536                      | Listeria_ivanovii_subsp_ivanovii_202751_v2 | 0.8612 |
| Listeria_monocytogenes_FSL_R2-561_393126                 | Listeria_ivanovii_subsp_ivanovii_202751_v2 | 0.878  |
| Listeria_monocytogenes_FSL_J1-208_393119                 | Listeria_ivanovii_subsp_ivanovii_202751_v2 | 0.8744 |
| Listeria_monocytogenes_FSL_J1-175_393118                 | Listeria_ivanovii_subsp_ivanovii_202751_v2 | 0.8948 |
| Listeria_monocytogenes_Finland_1998_393127               | Listeria_ivanovii_subsp_ivanovii_202751_v2 | 0.897  |
| Listeria_monocytogenes_EGD-e_169963_v1                   | Listeria_ivanovii_subsp_ivanovii_202751_v2 | 0.8863 |
| Listeria_monocytogenes_EGD-e_169963                      | Listeria_ivanovii_subsp_ivanovii_202751_v2 | 0.8867 |
| Listeria_monocytogenes_EGD_1334565                       | Listeria_ivanovii_subsp_ivanovii_202751_v2 | 0.8867 |
| Listeria_monocytogenes_CFSAN002349_1299895               | Listeria_ivanovii_subsp_ivanovii_202751_v2 | 0.9    |
| Listeria_monocytogenes_ATCC_19117_882095_v1              | Listeria_ivanovii_subsp_ivanovii_202751_v2 | 0.8978 |
| Listeria_monocytogenes_ATCC_19117_882095                 | Listeria_ivanovii_subsp_ivanovii_202751_v2 | 0.8978 |
| Listeria_monocytogenes_6179_1288295                      | Listeria_ivanovii_subsp_ivanovii_202751_v2 | 0.8629 |
| Listeria_monocytogenes_1639_v9                           | Listeria_ivanovii_subsp_ivanovii_202751_v2 | 0.8674 |
| Listeria_monocytogenes_1639_v99                          | Listeria_ivanovii_subsp_ivanovii_202751_v2 | 0.8815 |
| Listeria_monocytogenes_1639_v98                          | Listeria_ivanovii_subsp_ivanovii_202751_v2 | 0.8771 |
| Listeria_monocytogenes_1639_v97                          | Listeria_ivanovii_subsp_ivanovii_202751_v2 | 0.8931 |
| Listeria_monocytogenes_1639_v96                          | Listeria_ivanovii_subsp_ivanovii_202751_v2 | 0.8808 |
| Listeria_monocytogenes_1639_v95                          | Listeria_ivanovii_subsp_ivanovii_202751_v2 | 0.8809 |
| Listeria_monocytogenes_1639_v94                          | Listeria_ivanovii_subsp_ivanovii_202751_v2 | 0.8808 |
| Listeria_monocytogenes_1639_v93                          | Listeria_ivanovii_subsp_ivanovii_202751_v2 | 0.8737 |
| Listeria_monocytogenes_1639_v92                          | Listeria_ivanovii_subsp_ivanovii_202751_v2 |        |

[illegible]

[illegible]

|                                                          |                                                |        |
|----------------------------------------------------------|------------------------------------------------|--------|
| Listeria_monocytogenes_SLCC5850_882096                   | Listeria_ivanovii_subsp_ivanovii_PAM_55_881621 | 0.8851 |
| Listeria_monocytogenes_SLCC2755_932919                   | Listeria_ivanovii_subsp_ivanovii_PAM_55_881621 | 0.8891 |
| Listeria_monocytogenes_SLCC2540_879089                   | Listeria_ivanovii_subsp_ivanovii_PAM_55_881621 | 0.889  |
| Listeria_monocytogenes_SLCC2479_882020                   | Listeria_ivanovii_subsp_ivanovii_PAM_55_881621 | 0.8785 |
| Listeria_monocytogenes_SLCC2378_879088                   | Listeria_ivanovii_subsp_ivanovii_PAM_55_881621 | 0.898  |
| Listeria_monocytogenes_SLCC2376_882097                   | Listeria_ivanovii_subsp_ivanovii_PAM_55_881621 | 0.8958 |
| Listeria_monocytogenes_SLCC2372_932920                   | Listeria_ivanovii_subsp_ivanovii_PAM_55_881621 | 0.8716 |
| Listeria_monocytogenes_serotype_4b_str_LL195_1230340     | Listeria_ivanovii_subsp_ivanovii_PAM_55_881621 | 0.9038 |
| Listeria_monocytogenes_serotype_4b_str_LIS0087_1134669   | Listeria_ivanovii_subsp_ivanovii_PAM_55_881621 | 0.8609 |
| Listeria_monocytogenes_serotype_4b_str_F2365_265669      | Listeria_ivanovii_subsp_ivanovii_PAM_55_881621 | 0.9038 |
| Listeria_monocytogenes_serotype_4b_str_CLIP_80459_568819 | Listeria_ivanovii_subsp_ivanovii_PAM_55_881621 | 0.9026 |
| Listeria_monocytogenes_serotype_4b_str_81-0861_1196161   | Listeria_ivanovii_subsp_ivanovii_PAM_55_881621 | 0.887  |
| Listeria_monocytogenes_serotype_4b_str_81-0592_1196160   | Listeria_ivanovii_subsp_ivanovii_PAM_55_881621 | 0.8881 |
| Listeria_monocytogenes_serotype_4b_str_81-0558_1196159   | Listeria_ivanovii_subsp_ivanovii_PAM_55_881621 | 0.8891 |
| Listeria_monocytogenes_serotype_4b_str_10-0809_1196162   | Listeria_ivanovii_subsp_ivanovii_PAM_55_881621 | 0.8885 |
| Listeria_monocytogenes_serotype_4b_str_02-6680_1196175   | Listeria_ivanovii_subsp_ivanovii_PAM_55_881621 | 0.9013 |
| Listeria_monocytogenes_serotype_4b_str_02-6679_1196174   | Listeria_ivanovii_subsp_ivanovii_PAM_55_881621 | 0.9013 |
| Listeria_monocytogenes_serotype_4b_str_02-1792_1196173   | Listeria_ivanovii_subsp_ivanovii_PAM_55_881621 | 0.8888 |
| Listeria_monocytogenes_serotype_4b_str_02-1289_1196172   | Listeria_ivanovii_subsp_ivanovii_PAM_55_881621 | 0.8888 |
| Listeria_monocytogenes_serotype_4b_str_02-1103_1196171   | Listeria_ivanovii_subsp_ivanovii_PAM_55_881621 | 0.8888 |
| Listeria_monocytogenes_serotype_3c_str_10-5027_1196195   | Listeria_ivanovii_subsp_ivanovii_PAM_55_881621 | 0.8773 |
| Listeria_monocytogenes_serotype_1_2c_str_10-5026_1196194 | Listeria_ivanovii_subsp_ivanovii_PAM_55_881621 | 0.8784 |
| Listeria_monocytogenes_serotype_1_2c_str_10-5025_1196193 | Listeria_ivanovii_subsp_ivanovii_PAM_55_881621 | 0.8784 |
| Listeria_monocytogenes_serotype_1_2b_str_10-0811_1196164 | Listeria_ivanovii_subsp_ivanovii_PAM_55_881621 | 0.8779 |
| Listeria_monocytogenes_serotype_1_2b_str_10-0810_1196163 | Listeria_ivanovii_subsp_ivanovii_PAM_55_881621 | 0.8779 |
| Listeria_monocytogenes_serotype_1_2a_str_99-6370_1196179 | Listeria_ivanovii_subsp_ivanovii_PAM_55_881621 | 0.8648 |
| Listeria_monocytogenes_serotype_1_2a_str_98-2035_1196178 | Listeria_ivanovii_subsp_ivanovii_PAM_55_881621 | 0.8648 |
| Listeria_monocytogenes_serotype_1_2a_str_95-0093_1196177 | Listeria_ivanovii_subsp_ivanovii_PAM_55_881621 | 0.8699 |
| Listeria_monocytogenes_serotype_1_2a_str_88-0478_1196176 | Listeria_ivanovii_subsp_ivanovii_PAM_55_881621 | 0.8691 |
| Listeria_monocytogenes_serotype_1_2a_str_10-5024_1196192 | Listeria_ivanovii_subsp_ivanovii_PAM_55_881621 | 0.8703 |
| Listeria_monocytogenes_serotype_1_2a_str_10-4758_1196168 | Listeria_ivanovii_subsp_ivanovii_PAM_55_881621 | 0.8845 |
| Listeria_monocytogenes_serotype_1_2a_str_10-4754_1196167 | Listeria_ivanovii_subsp_ivanovii_PAM_55_881621 | 0.8845 |
| Listeria_monocytogenes_serotype_1_2a_str_10-1321_1196191 | Listeria_ivanovii_subsp_ivanovii_PAM_55_881621 | 0.8703 |
| Listeria_monocytogenes_serotype_1_2a_str_10-1047_1196190 | Listeria_ivanovii_subsp_ivanovii_PAM_55_881621 | 0.8706 |
| Listeria_monocytogenes_serotype_1_2a_str_10-1046_1196189 | Listeria_ivanovii_subsp_ivanovii_PAM_55_881621 | 0.8706 |
| Listeria_monocytogenes_serotype_1_2a_str_10-0934_1196170 | Listeria_ivanovii_subsp_ivanovii_PAM_55_881621 | 0.8946 |
| Listeria_monocytogenes_serotype_1_2a_str_10-0933_1196169 | Listeria_ivanovii_subsp_ivanovii_PAM_55_881621 | 0.8946 |
| Listeria_monocytogenes_serotype_1_2a_str_10-0815_1196188 | Listeria_ivanovii_subsp_ivanovii_PAM_55_881621 | 0.8661 |
| Listeria_monocytogenes_serotype_1_2a_str_10-0814_1196187 | Listeria_ivanovii_subsp_ivanovii_PAM_55_881621 | 0.8703 |
| Listeria_monocytogenes_serotype_1_2a_str_10-0813_1196166 | Listeria_ivanovii_subsp_ivanovii_PAM_55_881621 | 0.8777 |
| Listeria_monocytogenes_serotype_1_2a_str_10-0812_1196165 | Listeria_ivanovii_subsp_ivanovii_PAM_55_881621 | 0.8777 |
| Listeria_monocytogenes_serotype_1_2a_str_08-7669_1196186 | Listeria_ivanovii_subsp_ivanovii_PAM_55_881621 | 0.8784 |
| Listeria_monocytogenes_serotype_1_2a_str_08-7374_1196185 | Listeria_ivanovii_subsp_ivanovii_PAM_55_881621 | 0.8703 |
| Listeria_monocytogenes_serotype_1_2a_str_08-6997_1196184 | Listeria_ivanovii_subsp_ivanovii_PAM_55_881621 | 0.8661 |
| Listeria_monocytogenes_serotype_1_2a_str_08-6569_1196183 | Listeria_ivanovii_subsp_ivanovii_PAM_55_881621 | 0.8661 |
| Listeria_monocytogenes_serotype_1_2a_str_08-6056_1196182 | Listeria_ivanovii_subsp_ivanovii_PAM_55_881621 | 0.8661 |
| Listeria_monocytogenes_serotype_1_2a_str_04-5457_1196181 | Listeria_ivanovii_subsp_ivanovii_PAM_55_881621 | 0.8703 |
| Listeria_monocytogenes_serotype_1_2a_str_02-5993_1196180 | Listeria_ivanovii_subsp_ivanovii_PAM_55_881621 | 0.8699 |
| Listeria_monocytogenes_R479a_1437838                     | Listeria_ivanovii_subsp_ivanovii_PAM_55_881621 | 0.8697 |
| Listeria_monocytogenes_N53-1_1234142                     | Listeria_ivanovii_subsp_ivanovii_PAM_55_881621 | 0.8492 |
| Listeria_monocytogenes_M7_1030009                        | Listeria_ivanovii_subsp_ivanovii_PAM_55_881621 | 0.8619 |
| Listeria_monocytogenes_LO28_393132                       | Listeria_ivanovii_subsp_ivanovii_PAM_55_881621 | 0.8772 |
| Listeria_monocytogenes_L99_563174                        | Listeria_ivanovii_subsp_ivanovii_PAM_55_881621 | 0.8625 |
| Listeria_monocytogenes_L312_882094                       | Listeria_ivanovii_subsp_ivanovii_PAM_55_881621 | 0.9026 |
| Listeria_monocytogenes_J1816_930781                      | Listeria_ivanovii_subsp_ivanovii_PAM_55_881621 | 0.8802 |
| Listeria_monocytogenes_J1-220_930782                     | Listeria_ivanovii_subsp_ivanovii_PAM_55_881621 | 0.8773 |
| Listeria_monocytogenes_J0161_393130                      | Listeria_ivanovii_subsp_ivanovii_PAM_55_881621 | 0.8798 |
| Listeria_monocytogenes_HCC23_552536                      | Listeria_ivanovii_subsp_ivanovii_PAM_55_881621 | 0.8622 |
| Listeria_monocytogenes_FSL_R2-561_393126                 | Listeria_ivanovii_subsp_ivanovii_PAM_55_881621 | 0.8767 |
| Listeria_monocytogenes_FSL_J1-208_393119                 | Listeria_ivanovii_subsp_ivanovii_PAM_55_881621 | 0.8732 |
| Listeria_monocytogenes_FSL_J1-175_393118                 | Listeria_ivanovii_subsp_ivanovii_PAM_55_881621 | 0.8931 |
| Listeria_monocytogenes_Finland_1998_393127               | Listeria_ivanovii_subsp_ivanovii_PAM_55_881621 | 0.8988 |
| Listeria_monocytogenes_EGD-e_169963_v1                   | Listeria_ivanovii_subsp_ivanovii_PAM_55_881621 | 0.885  |
| Listeria_monocytogenes_EGD-e_169963                      | Listeria_ivanovii_subsp_ivanovii_PAM_55_881621 | 0.8854 |
| Listeria_monocytogenes_EGD_1334565                       | Listeria_ivanovii_subsp_ivanovii_PAM_55_881621 | 0.8854 |
| Listeria_monocytogenes_CFSAN002349_1299895               | Listeria_ivanovii_subsp_ivanovii_PAM_55_881621 | 0.8983 |
| Listeria_monocytogenes_ATCC_19117_882095_v1              | Listeria_ivanovii_subsp_ivanovii_PAM_55_881621 | 0.8962 |
| Listeria_monocytogenes_ATCC_19117_882095                 | Listeria_ivanovii_subsp_ivanovii_PAM_55_881621 | 0.8961 |
| Listeria_monocytogenes_6179_1288295                      | Listeria_ivanovii_subsp_ivanovii_PAM_55_881621 | 0.8644 |
| Listeria_monocytogenes_1639_v9                           | Listeria_ivanovii_subsp_ivanovii_PAM_55_881621 | 0.8659 |
| Listeria_monocytogenes_1639_v99                          | Listeria_ivanovii_subsp_ivanovii_PAM_55_881621 | 0.8799 |
| Listeria_monocytogenes_1639_v98                          | Listeria_ivanovii_subsp_ivanovii_PAM_55_881621 | 0.8758 |
| Listeria_monocytogenes_1639_v97                          | Listeria_ivanovii_subsp_ivanovii_PAM_55_881621 | 0.8915 |
| Listeria_monocytogenes_1639_v96                          | Listeria_ivanovii_subsp_ivanovii_PAM_55_881621 | 0.8792 |
| Listeria_monocytogenes_1639_v95                          | Listeria_ivanovii_subsp_ivanovii_PAM_55_881621 | 0.8793 |
| Listeria_monocytogenes_1639_v94                          | Listeria_ivanovii_subsp_ivanovii_PAM_55_881621 | 0.8792 |
| Listeria_monocytogenes_1639_v93                          | Listeria_ivanovii_subsp_ivanovii_PAM_55_881621 | 0.8751 |
| Listeria_monocytogenes_1639_v92                          | Listeria_ivanovii_subsp_ivanovii_PAM_55_881621 | 0.8796 |
| Listeria_monocytogenes_1639_v91                          | Listeria_ivanovii_subsp_ivanovii_PAM_55_881621 | 0.8861 |
| Listeria_monocytogenes_1639_v90                          | Listeria_ivanovii_subsp_ivanovii_PAM_55_881621 | 0.8758 |
| Listeria_monocytogenes_1639_v8                           | Listeria_ivanovii_subsp_ivanovii_PAM_55_881621 | 0.8596 |
| Listeria_monocytogenes_1639_v89                          | Listeria_ivanovii_subsp_ivanovii_PAM_55_881621 | 0.8921 |
| Listeria_monocytogenes_1639_v88                          | Listeria_ivanovii_subsp_ivanovii_PAM_55_881621 | 0.877  |
| Listeria_monocytogenes_1639_v87                          | Listeria_ivanovii_subsp_ivanovii_PAM_55_881621 | 0.8726 |
| Listeria_monocytogenes_1639_v86                          | Listeria_ivanovii_subsp_ivanovii_PAM_55_881621 | 0.8726 |
| Listeria_monocytogenes_1639_v85                          | Listeria_ivanovii_subsp_ivanovii_PAM_55_881621 | 0.8868 |
| Listeria_monocytogenes_1639_v84                          | Listeria_ivanovii_subsp_ivanovii_PAM_55_881621 | 0.879  |
| Listeria_monocytogenes_1639_v83                          | Listeria_ivanovii_subsp_ivanovii_PAM_55_881621 | 0.8856 |
| Listeria_monocytogenes_1639_v82                          | Listeria_ivanovii_subsp_ivanovii_PAM_55_881621 | 0.8854 |
| Listeria_monocytogenes_1639_v81                          | Listeria_ivanovii_subsp_ivanovii_PAM_55_881621 | 0.8804 |
| Listeria_monocytogenes_1639_v80                          | Listeria_ivanovii_subsp_ivanovii_PAM_55_881621 | 0.8824 |



[illegible]



[illegible]

|                                                          |                                                |        |
|----------------------------------------------------------|------------------------------------------------|--------|
| Listeria_marthii_529731_v1                               | Listeria_ivanovii_subsp_ivanovii_PAM_55_881621 | 0.8629 |
| Listeria_marthii_529731                                  | Listeria_ivanovii_subsp_ivanovii_PAM_55_881621 | 0.8725 |
| Listeria_ivanovii_WSLC3009_1457190                       | Listeria_ivanovii_subsp_ivanovii_PAM_55_881621 | 0.9946 |
| Listeria_ivanovii_subsp_londoniensis_202752_v2           | Listeria_ivanovii_subsp_ivanovii_PAM_55_881621 | 0.9011 |
| Listeria_ivanovii_subsp_londoniensis_202752_v1           | Listeria_ivanovii_subsp_ivanovii_PAM_55_881621 | 0.8924 |
| Listeria_ivanovii_subsp_londoniensis_202752              | Listeria_ivanovii_subsp_ivanovii_PAM_55_881621 | 0.8965 |
| Listeria_ivanovii_subsp_ivanovii_PAM_55_881621           | Listeria_ivanovii_subsp_ivanovii_PAM_55_881621 | 0.0644 |
| Listeria_welshimeri_1643                                 | Listeria_ivanovii_subsp_londoniensis_202752    | 0.8654 |
| Listeria_welshimeri_serovar_6b_str_SLCC5334_386043       | Listeria_ivanovii_subsp_londoniensis_202752    | 0.8651 |
| Listeria_seeligeri_serovar_1_2b_str_SLCC3954_683837      | Listeria_ivanovii_subsp_londoniensis_202752    | 0.8782 |
| Listeria_seeligeri_FSL_S4-171_702452                     | Listeria_ivanovii_subsp_londoniensis_202752    | 0.8271 |
| Listeria_seeligeri_FSL_N1-067_702453                     | Listeria_ivanovii_subsp_londoniensis_202752    | 0.8348 |
| Listeria_seeligeri_1640_v1                               | Listeria_ivanovii_subsp_londoniensis_202752    | 0.8928 |
| Listeria_seeligeri_1640                                  | Listeria_ivanovii_subsp_londoniensis_202752    | 0.8787 |
| Listeria_monocytogenes_WSLC1042_1457188                  | Listeria_ivanovii_subsp_londoniensis_202752    | 0.8829 |
| Listeria_monocytogenes_WSLC1001_1457187                  | Listeria_ivanovii_subsp_londoniensis_202752    | 0.8739 |
| Listeria_monocytogenes_SLCC7179_879090                   | Listeria_ivanovii_subsp_londoniensis_202752    | 0.8808 |
| Listeria_monocytogenes_SLCC5850_882096                   | Listeria_ivanovii_subsp_londoniensis_202752    | 0.8786 |
| Listeria_monocytogenes_SLCC2755_932919                   | Listeria_ivanovii_subsp_londoniensis_202752    | 0.8763 |
| Listeria_monocytogenes_SLCC2540_879089                   | Listeria_ivanovii_subsp_londoniensis_202752    | 0.8765 |
| Listeria_monocytogenes_SLCC2479_882020                   | Listeria_ivanovii_subsp_londoniensis_202752    | 0.8759 |
| Listeria_monocytogenes_SLCC2378_879088                   | Listeria_ivanovii_subsp_londoniensis_202752    | 0.8839 |
| Listeria_monocytogenes_SLCC2376_882097                   | Listeria_ivanovii_subsp_londoniensis_202752    | 0.8837 |
| Listeria_monocytogenes_SLCC2372_932920                   | Listeria_ivanovii_subsp_londoniensis_202752    | 0.8698 |
| Listeria_monocytogenes_serotype_4b_str_LL195_1230340     | Listeria_ivanovii_subsp_londoniensis_202752    | 0.8892 |
| Listeria_monocytogenes_serotype_4b_str_LIS0087_1134669   | Listeria_ivanovii_subsp_londoniensis_202752    | 0.8553 |
| Listeria_monocytogenes_serotype_4b_str_F2365_265669      | Listeria_ivanovii_subsp_londoniensis_202752    | 0.8892 |
| Listeria_monocytogenes_serotype_4b_str_CLIP_80459_568819 | Listeria_ivanovii_subsp_londoniensis_202752    | 0.8899 |
| Listeria_monocytogenes_serotype_4b_str_81-0861_1196161   | Listeria_ivanovii_subsp_londoniensis_202752    | 0.8761 |
| Listeria_monocytogenes_serotype_4b_str_81-0592_1196160   | Listeria_ivanovii_subsp_londoniensis_202752    | 0.8772 |
| Listeria_monocytogenes_serotype_4b_str_81-0558_1196159   | Listeria_ivanovii_subsp_londoniensis_202752    | 0.8779 |
| Listeria_monocytogenes_serotype_4b_str_10-0809_1196162   | Listeria_ivanovii_subsp_londoniensis_202752    | 0.8775 |
| Listeria_monocytogenes_serotype_4b_str_02-6680_1196175   | Listeria_ivanovii_subsp_londoniensis_202752    | 0.8905 |
| Listeria_monocytogenes_serotype_4b_str_02-6679_1196174   | Listeria_ivanovii_subsp_londoniensis_202752    | 0.8905 |
| Listeria_monocytogenes_serotype_4b_str_02-1792_1196173   | Listeria_ivanovii_subsp_londoniensis_202752    | 0.8779 |
| Listeria_monocytogenes_serotype_4b_str_02-1289_1196172   | Listeria_ivanovii_subsp_londoniensis_202752    | 0.8779 |
| Listeria_monocytogenes_serotype_4b_str_02-1103_1196171   | Listeria_ivanovii_subsp_londoniensis_202752    | 0.8779 |
| Listeria_monocytogenes_serotype_3c_str_10-5027_1196195   | Listeria_ivanovii_subsp_londoniensis_202752    | 0.8755 |
| Listeria_monocytogenes_serotype_1_2c_str_10-5026_1196194 | Listeria_ivanovii_subsp_londoniensis_202752    | 0.8763 |
| Listeria_monocytogenes_serotype_1_2c_str_10-5025_1196193 | Listeria_ivanovii_subsp_londoniensis_202752    | 0.8763 |
| Listeria_monocytogenes_serotype_1_2b_str_10-0811_1196164 | Listeria_ivanovii_subsp_londoniensis_202752    | 0.8686 |
| Listeria_monocytogenes_serotype_1_2b_str_10-0810_1196163 | Listeria_ivanovii_subsp_londoniensis_202752    | 0.8686 |
| Listeria_monocytogenes_serotype_1_2a_str_99-6370_1196179 | Listeria_ivanovii_subsp_londoniensis_202752    | 0.8638 |
| Listeria_monocytogenes_serotype_1_2a_str_98-2035_1196178 | Listeria_ivanovii_subsp_londoniensis_202752    | 0.8638 |
| Listeria_monocytogenes_serotype_1_2a_str_95-0093_1196177 | Listeria_ivanovii_subsp_londoniensis_202752    | 0.8693 |
| Listeria_monocytogenes_serotype_1_2a_str_88-0478_1196176 | Listeria_ivanovii_subsp_londoniensis_202752    | 0.8677 |
| Listeria_monocytogenes_serotype_1_2a_str_10-5024_1196192 | Listeria_ivanovii_subsp_londoniensis_202752    | 0.8693 |
| Listeria_monocytogenes_serotype_1_2a_str_10-4758_1196168 | Listeria_ivanovii_subsp_londoniensis_202752    | 0.875  |
| Listeria_monocytogenes_serotype_1_2a_str_10-4754_1196167 | Listeria_ivanovii_subsp_londoniensis_202752    | 0.8754 |
| Listeria_monocytogenes_serotype_1_2a_str_10-1321_1196191 | Listeria_ivanovii_subsp_londoniensis_202752    | 0.8693 |
| Listeria_monocytogenes_serotype_1_2a_str_10-1047_1196190 | Listeria_ivanovii_subsp_londoniensis_202752    | 0.8695 |
| Listeria_monocytogenes_serotype_1_2a_str_10-1046_1196189 | Listeria_ivanovii_subsp_londoniensis_202752    | 0.8695 |
| Listeria_monocytogenes_serotype_1_2a_str_10-0934_1196170 | Listeria_ivanovii_subsp_londoniensis_202752    | 0.8868 |
| Listeria_monocytogenes_serotype_1_2a_str_10-0933_1196169 | Listeria_ivanovii_subsp_londoniensis_202752    | 0.8868 |
| Listeria_monocytogenes_serotype_1_2a_str_10-0815_1196188 | Listeria_ivanovii_subsp_londoniensis_202752    | 0.8651 |
| Listeria_monocytogenes_serotype_1_2a_str_10-0814_1196187 | Listeria_ivanovii_subsp_londoniensis_202752    | 0.8693 |
| Listeria_monocytogenes_serotype_1_2a_str_10-0813_1196166 | Listeria_ivanovii_subsp_londoniensis_202752    | 0.8728 |
| Listeria_monocytogenes_serotype_1_2a_str_10-0812_1196165 | Listeria_ivanovii_subsp_londoniensis_202752    | 0.8728 |
| Listeria_monocytogenes_serotype_1_2a_str_08-7669_1196186 | Listeria_ivanovii_subsp_londoniensis_202752    | 0.8769 |
| Listeria_monocytogenes_serotype_1_2a_str_08-7374_1196185 | Listeria_ivanovii_subsp_londoniensis_202752    | 0.8693 |
| Listeria_monocytogenes_serotype_1_2a_str_08-6997_1196184 | Listeria_ivanovii_subsp_londoniensis_202752    | 0.8651 |
| Listeria_monocytogenes_serotype_1_2a_str_08-6569_1196183 | Listeria_ivanovii_subsp_londoniensis_202752    | 0.8651 |
| Listeria_monocytogenes_serotype_1_2a_str_08-6056_1196182 | Listeria_ivanovii_subsp_londoniensis_202752    | 0.8651 |
| Listeria_monocytogenes_serotype_1_2a_str_04-5457_1196181 | Listeria_ivanovii_subsp_londoniensis_202752    | 0.8693 |
| Listeria_monocytogenes_serotype_1_2a_str_02-5993_1196180 | Listeria_ivanovii_subsp_londoniensis_202752    | 0.8693 |
| Listeria_monocytogenes_R479a_1437838                     | Listeria_ivanovii_subsp_londoniensis_202752    | 0.869  |
| Listeria_monocytogenes_N53-1_1234142                     | Listeria_ivanovii_subsp_londoniensis_202752    | 0.8406 |
| Listeria_monocytogenes_M7_1030009                        | Listeria_ivanovii_subsp_londoniensis_202752    | 0.8557 |
| Listeria_monocytogenes_LO28_393132                       | Listeria_ivanovii_subsp_londoniensis_202752    | 0.8716 |
| Listeria_monocytogenes_L99_563174                        | Listeria_ivanovii_subsp_londoniensis_202752    | 0.8557 |
| Listeria_monocytogenes_L312_882094                       | Listeria_ivanovii_subsp_londoniensis_202752    | 0.8899 |
| Listeria_monocytogenes_J1816_930781                      | Listeria_ivanovii_subsp_londoniensis_202752    | 0.8799 |
| Listeria_monocytogenes_J1-220_930782                     | Listeria_ivanovii_subsp_londoniensis_202752    | 0.8699 |
| Listeria_monocytogenes_J0161_393130                      | Listeria_ivanovii_subsp_londoniensis_202752    | 0.8791 |
| Listeria_monocytogenes_HCC23_552536                      | Listeria_ivanovii_subsp_londoniensis_202752    | 0.8553 |
| Listeria_monocytogenes_FSL_R2-561_393126                 | Listeria_ivanovii_subsp_londoniensis_202752    | 0.8742 |
| Listeria_monocytogenes_FSL_J1-208_393119                 | Listeria_ivanovii_subsp_londoniensis_202752    | 0.8691 |
| Listeria_monocytogenes_FSL_J1-175_393118                 | Listeria_ivanovii_subsp_londoniensis_202752    | 0.8798 |
| Listeria_monocytogenes_Finland_1998_393127               | Listeria_ivanovii_subsp_londoniensis_202752    | 0.8887 |
| Listeria_monocytogenes_EGD-e_169963_v1                   | Listeria_ivanovii_subsp_londoniensis_202752    | 0.8767 |
| Listeria_monocytogenes_EGD-e_169963                      | Listeria_ivanovii_subsp_londoniensis_202752    | 0.8767 |
| Listeria_monocytogenes_EGD_1334565                       | Listeria_ivanovii_subsp_londoniensis_202752    | 0.879  |
| Listeria_monocytogenes_CFSAN002349_1299895               | Listeria_ivanovii_subsp_londoniensis_202752    | 0.8902 |
| Listeria_monocytogenes_ATCC_19117_882095_v1              | Listeria_ivanovii_subsp_londoniensis_202752    | 0.8854 |
| Listeria_monocytogenes_ATCC_19117_882095                 | Listeria_ivanovii_subsp_londoniensis_202752    | 0.885  |
| Listeria_monocytogenes_6179_1288295                      | Listeria_ivanovii_subsp_londoniensis_202752    | 0.866  |
| Listeria_monocytogenes_1639_v9                           | Listeria_ivanovii_subsp_londoniensis_202752    | 0.8619 |
| Listeria_monocytogenes_1639_v99                          | Listeria_ivanovii_subsp_londoniensis_202752    | 0.8811 |
| Listeria_monocytogenes_1639_v98                          | Listeria_ivanovii_subsp_londoniensis_202752    | 0.8744 |
| Listeria_monocytogenes_1639_v97                          | Listeria_ivanovii_subsp_londoniensis_202752    | 0.888  |
| Listeria_monocytogenes_1639_v96                          | Listeria_ivanovii_subsp_londoniensis_202752    | 0.88   |

[illegible]

[illegible]

|                                                          |                                                |        |
|----------------------------------------------------------|------------------------------------------------|--------|
| Listeria_monocytogenes_1639_v10                          | Listeria_ivanovii_subsp_londoniensis_202752    | 0.859  |
| Listeria_monocytogenes_1639_v109                         | Listeria_ivanovii_subsp_londoniensis_202752    | 0.8798 |
| Listeria_monocytogenes_1639_v108                         | Listeria_ivanovii_subsp_londoniensis_202752    | 0.8798 |
| Listeria_monocytogenes_1639_v107                         | Listeria_ivanovii_subsp_londoniensis_202752    | 0.8844 |
| Listeria_monocytogenes_1639_v106                         | Listeria_ivanovii_subsp_londoniensis_202752    | 0.8844 |
| Listeria_monocytogenes_1639_v105                         | Listeria_ivanovii_subsp_londoniensis_202752    | 0.8848 |
| Listeria_monocytogenes_1639_v104                         | Listeria_ivanovii_subsp_londoniensis_202752    | 0.8844 |
| Listeria_monocytogenes_1639_v103                         | Listeria_ivanovii_subsp_londoniensis_202752    | 0.8847 |
| Listeria_monocytogenes_1639_v102                         | Listeria_ivanovii_subsp_londoniensis_202752    | 0.8791 |
| Listeria_monocytogenes_1639_v101                         | Listeria_ivanovii_subsp_londoniensis_202752    | 0.8687 |
| Listeria_monocytogenes_1639_v100                         | Listeria_ivanovii_subsp_londoniensis_202752    | 0.868  |
| Listeria_monocytogenes_1639                              | Listeria_ivanovii_subsp_londoniensis_202752    | 0.8878 |
| Listeria_monocytogenes_10403S_393133                     | Listeria_ivanovii_subsp_londoniensis_202752    | 0.8811 |
| Listeria_monocytogenes_08-5923_637381                    | Listeria_ivanovii_subsp_londoniensis_202752    | 0.8693 |
| Listeria_monocytogenes_08-5578_653938                    | Listeria_ivanovii_subsp_londoniensis_202752    | 0.8569 |
| Listeria_monocytogenes_07PF0776_1126011                  | Listeria_ivanovii_subsp_londoniensis_202752    | 0.8888 |
| Listeria_marthii_FSL_S4-120_702457                       | Listeria_ivanovii_subsp_londoniensis_202752    | 0.8111 |
| Listeria_marthii_529731_v1                               | Listeria_ivanovii_subsp_londoniensis_202752    | 0.8533 |
| Listeria_marthii_529731                                  | Listeria_ivanovii_subsp_londoniensis_202752    | 0.8585 |
| Listeria_ivanovii_WSLC3009_1457190                       | Listeria_ivanovii_subsp_londoniensis_202752    | 0.897  |
| Listeria_ivanovii_subsp_londoniensis_202752_v2           | Listeria_ivanovii_subsp_londoniensis_202752    | 0.9821 |
| Listeria_ivanovii_subsp_londoniensis_202752_v1           | Listeria_ivanovii_subsp_londoniensis_202752    | 0.9437 |
| Listeria_ivanovii_subsp_londoniensis_202752              | Listeria_ivanovii_subsp_londoniensis_202752    | 0.0624 |
| Listeria_welshimeri_1643                                 | Listeria_ivanovii_subsp_londoniensis_202752_v1 | 0.865  |
| Listeria_welshimeri_serovar_6b_str_SLCC5334_386043       | Listeria_ivanovii_subsp_londoniensis_202752_v1 | 0.8647 |
| Listeria_seeligeri_serovar_1_2b_str_SLCC3954_683837      | Listeria_ivanovii_subsp_londoniensis_202752_v1 | 0.8746 |
| Listeria_seeligeri_FSL_S4-171_702452                     | Listeria_ivanovii_subsp_londoniensis_202752_v1 | 0.8142 |
| Listeria_seeligeri_FSL_N1-067_702453                     | Listeria_ivanovii_subsp_londoniensis_202752_v1 | 0.8298 |
| Listeria_seeligeri_1640_v1                               | Listeria_ivanovii_subsp_londoniensis_202752_v1 | 0.8895 |
| Listeria_seeligeri_1640                                  | Listeria_ivanovii_subsp_londoniensis_202752_v1 | 0.8749 |
| Listeria_monocytogenes_WSLC1042_1457188                  | Listeria_ivanovii_subsp_londoniensis_202752_v1 | 0.8805 |
| Listeria_monocytogenes_WSLC1001_1457187                  | Listeria_ivanovii_subsp_londoniensis_202752_v1 | 0.8761 |
| Listeria_monocytogenes_SLCC7179_879090                   | Listeria_ivanovii_subsp_londoniensis_202752_v1 | 0.8738 |
| Listeria_monocytogenes_SLCC5850_882096                   | Listeria_ivanovii_subsp_londoniensis_202752_v1 | 0.8778 |
| Listeria_monocytogenes_SLCC2755_932919                   | Listeria_ivanovii_subsp_londoniensis_202752_v1 | 0.8736 |
| Listeria_monocytogenes_SLCC2540_879089                   | Listeria_ivanovii_subsp_londoniensis_202752_v1 | 0.8768 |
| Listeria_monocytogenes_SLCC2479_882020                   | Listeria_ivanovii_subsp_londoniensis_202752_v1 | 0.8784 |
| Listeria_monocytogenes_SLCC2378_879088                   | Listeria_ivanovii_subsp_londoniensis_202752_v1 | 0.8814 |
| Listeria_monocytogenes_SLCC2376_882097                   | Listeria_ivanovii_subsp_londoniensis_202752_v1 | 0.8774 |
| Listeria_monocytogenes_SLCC2372_932920                   | Listeria_ivanovii_subsp_londoniensis_202752_v1 | 0.8731 |
| Listeria_monocytogenes_serotype_4b_str_LL195_1230340     | Listeria_ivanovii_subsp_londoniensis_202752_v1 | 0.8848 |
| Listeria_monocytogenes_serotype_4b_str_LIS0087_1134669   | Listeria_ivanovii_subsp_londoniensis_202752_v1 | 0.8554 |
| Listeria_monocytogenes_serotype_4b_str_F2365_265669      | Listeria_ivanovii_subsp_londoniensis_202752_v1 | 0.8848 |
| Listeria_monocytogenes_serotype_4b_str_CLIP_80459_568819 | Listeria_ivanovii_subsp_londoniensis_202752_v1 | 0.8847 |
| Listeria_monocytogenes_serotype_4b_str_81-0861_1196161   | Listeria_ivanovii_subsp_londoniensis_202752_v1 | 0.8734 |
| Listeria_monocytogenes_serotype_4b_str_81-0592_1196160   | Listeria_ivanovii_subsp_londoniensis_202752_v1 | 0.8744 |
| Listeria_monocytogenes_serotype_4b_str_81-0558_1196159   | Listeria_ivanovii_subsp_londoniensis_202752_v1 | 0.8751 |
| Listeria_monocytogenes_serotype_4b_str_10-0809_1196162   | Listeria_ivanovii_subsp_londoniensis_202752_v1 | 0.8748 |
| Listeria_monocytogenes_serotype_4b_str_02-6680_1196175   | Listeria_ivanovii_subsp_londoniensis_202752_v1 | 0.8853 |
| Listeria_monocytogenes_serotype_4b_str_02-6679_1196174   | Listeria_ivanovii_subsp_londoniensis_202752_v1 | 0.8853 |
| Listeria_monocytogenes_serotype_4b_str_02-1792_1196173   | Listeria_ivanovii_subsp_londoniensis_202752_v1 | 0.8748 |
| Listeria_monocytogenes_serotype_4b_str_02-1289_1196172   | Listeria_ivanovii_subsp_londoniensis_202752_v1 | 0.8748 |
| Listeria_monocytogenes_serotype_4b_str_02-1103_1196171   | Listeria_ivanovii_subsp_londoniensis_202752_v1 | 0.8748 |
| Listeria_monocytogenes_serotype_3c_str_10-5027_1196195   | Listeria_ivanovii_subsp_londoniensis_202752_v1 | 0.8761 |
| Listeria_monocytogenes_serotype_1_2c_str_10-5026_1196194 | Listeria_ivanovii_subsp_londoniensis_202752_v1 | 0.8765 |
| Listeria_monocytogenes_serotype_1_2c_str_10-5025_1196193 | Listeria_ivanovii_subsp_londoniensis_202752_v1 | 0.8765 |
| Listeria_monocytogenes_serotype_1_2b_str_10-0811_1196164 | Listeria_ivanovii_subsp_londoniensis_202752_v1 | 0.8719 |
| Listeria_monocytogenes_serotype_1_2b_str_10-0810_1196163 | Listeria_ivanovii_subsp_londoniensis_202752_v1 | 0.8719 |
| Listeria_monocytogenes_serotype_1_2a_str_99-6370_1196179 | Listeria_ivanovii_subsp_londoniensis_202752_v1 | 0.859  |
| Listeria_monocytogenes_serotype_1_2a_str_98-2035_1196178 | Listeria_ivanovii_subsp_londoniensis_202752_v1 | 0.859  |
| Listeria_monocytogenes_serotype_1_2a_str_95-0093_1196177 | Listeria_ivanovii_subsp_londoniensis_202752_v1 | 0.8626 |
| Listeria_monocytogenes_serotype_1_2a_str_88-0478_1196176 | Listeria_ivanovii_subsp_londoniensis_202752_v1 | 0.861  |
| Listeria_monocytogenes_serotype_1_2a_str_10-5024_1196192 | Listeria_ivanovii_subsp_londoniensis_202752_v1 | 0.8626 |
| Listeria_monocytogenes_serotype_1_2a_str_10-4758_1196168 | Listeria_ivanovii_subsp_londoniensis_202752_v1 | 0.8787 |
| Listeria_monocytogenes_serotype_1_2a_str_10-4754_1196167 | Listeria_ivanovii_subsp_londoniensis_202752_v1 | 0.879  |
| Listeria_monocytogenes_serotype_1_2a_str_10-1321_1196191 | Listeria_ivanovii_subsp_londoniensis_202752_v1 | 0.8626 |
| Listeria_monocytogenes_serotype_1_2a_str_10-1047_1196190 | Listeria_ivanovii_subsp_londoniensis_202752_v1 | 0.8625 |
| Listeria_monocytogenes_serotype_1_2a_str_10-1046_1196189 | Listeria_ivanovii_subsp_londoniensis_202752_v1 | 0.8625 |
| Listeria_monocytogenes_serotype_1_2a_str_10-0934_1196170 | Listeria_ivanovii_subsp_londoniensis_202752_v1 | 0.8847 |
| Listeria_monocytogenes_serotype_1_2a_str_10-0933_1196169 | Listeria_ivanovii_subsp_londoniensis_202752_v1 | 0.8847 |
| Listeria_monocytogenes_serotype_1_2a_str_10-0815_1196188 | Listeria_ivanovii_subsp_londoniensis_202752_v1 | 0.8599 |
| Listeria_monocytogenes_serotype_1_2a_str_10-0814_1196187 | Listeria_ivanovii_subsp_londoniensis_202752_v1 | 0.8626 |
| Listeria_monocytogenes_serotype_1_2a_str_10-0813_1196166 | Listeria_ivanovii_subsp_londoniensis_202752_v1 | 0.8708 |
| Listeria_monocytogenes_serotype_1_2a_str_10-0812_1196165 | Listeria_ivanovii_subsp_londoniensis_202752_v1 | 0.8708 |
| Listeria_monocytogenes_serotype_1_2a_str_08-7669_1196186 | Listeria_ivanovii_subsp_londoniensis_202752_v1 | 0.8656 |
| Listeria_monocytogenes_serotype_1_2a_str_08-7374_1196185 | Listeria_ivanovii_subsp_londoniensis_202752_v1 | 0.8626 |
| Listeria_monocytogenes_serotype_1_2a_str_08-6997_1196184 | Listeria_ivanovii_subsp_londoniensis_202752_v1 | 0.8599 |
| Listeria_monocytogenes_serotype_1_2a_str_08-6569_1196183 | Listeria_ivanovii_subsp_londoniensis_202752_v1 | 0.8599 |
| Listeria_monocytogenes_serotype_1_2a_str_08-6056_1196182 | Listeria_ivanovii_subsp_londoniensis_202752_v1 | 0.8599 |
| Listeria_monocytogenes_serotype_1_2a_str_04-5457_1196181 | Listeria_ivanovii_subsp_londoniensis_202752_v1 | 0.8626 |
| Listeria_monocytogenes_serotype_1_2a_str_02-5993_1196180 | Listeria_ivanovii_subsp_londoniensis_202752_v1 | 0.8626 |
| Listeria_monocytogenes_R479a_1437838                     | Listeria_ivanovii_subsp_londoniensis_202752_v1 | 0.8627 |
| Listeria_monocytogenes_N53-1_1234142                     | Listeria_ivanovii_subsp_londoniensis_202752_v1 | 0.8382 |
| Listeria_monocytogenes_M7_1030009                        | Listeria_ivanovii_subsp_londoniensis_202752_v1 | 0.8665 |
| Listeria_monocytogenes_LO28_393132                       | Listeria_ivanovii_subsp_londoniensis_202752_v1 | 0.8778 |
| Listeria_monocytogenes_L99_563174                        | Listeria_ivanovii_subsp_londoniensis_202752_v1 | 0.8664 |
| Listeria_monocytogenes_L312_882094                       | Listeria_ivanovii_subsp_londoniensis_202752_v1 | 0.8847 |
| Listeria_monocytogenes_J1816_930781                      | Listeria_ivanovii_subsp_londoniensis_202752_v1 | 0.8679 |
| Listeria_monocytogenes_J1-220_930782                     | Listeria_ivanovii_subsp_londoniensis_202752_v1 | 0.8754 |
| Listeria_monocytogenes_J0161_393130                      | Listeria_ivanovii_subsp_londoniensis_202752_v1 | 0.8659 |
| Listeria_monocytogenes_HCC23_552536                      | Listeria_ivanovii_subsp_londoniensis_202752_v1 | 0.8661 |



[illegible]



[illegible]

|                                                          |                                                |        |
|----------------------------------------------------------|------------------------------------------------|--------|
| Listeria_monocytogenes_1639_v124                         | Listeria_ivanovii_subsp_londoniensis_202752_v1 | 0.8705 |
| Listeria_monocytogenes_1639_v123                         | Listeria_ivanovii_subsp_londoniensis_202752_v1 | 0.8854 |
| Listeria_monocytogenes_1639_v122                         | Listeria_ivanovii_subsp_londoniensis_202752_v1 | 0.8851 |
| Listeria_monocytogenes_1639_v121                         | Listeria_ivanovii_subsp_londoniensis_202752_v1 | 0.8851 |
| Listeria_monocytogenes_1639_v120                         | Listeria_ivanovii_subsp_londoniensis_202752_v1 | 0.8854 |
| Listeria_monocytogenes_1639_v11                          | Listeria_ivanovii_subsp_londoniensis_202752_v1 | 0.8601 |
| Listeria_monocytogenes_1639_v119                         | Listeria_ivanovii_subsp_londoniensis_202752_v1 | 0.8851 |
| Listeria_monocytogenes_1639_v118                         | Listeria_ivanovii_subsp_londoniensis_202752_v1 | 0.8851 |
| Listeria_monocytogenes_1639_v117                         | Listeria_ivanovii_subsp_londoniensis_202752_v1 | 0.8791 |
| Listeria_monocytogenes_1639_v116                         | Listeria_ivanovii_subsp_londoniensis_202752_v1 | 0.8811 |
| Listeria_monocytogenes_1639_v115                         | Listeria_ivanovii_subsp_londoniensis_202752_v1 | 0.8814 |
| Listeria_monocytogenes_1639_v114                         | Listeria_ivanovii_subsp_londoniensis_202752_v1 | 0.8733 |
| Listeria_monocytogenes_1639_v113                         | Listeria_ivanovii_subsp_londoniensis_202752_v1 | 0.8832 |
| Listeria_monocytogenes_1639_v112                         | Listeria_ivanovii_subsp_londoniensis_202752_v1 | 0.8782 |
| Listeria_monocytogenes_1639_v111                         | Listeria_ivanovii_subsp_londoniensis_202752_v1 | 0.8753 |
| Listeria_monocytogenes_1639_v110                         | Listeria_ivanovii_subsp_londoniensis_202752_v1 | 0.8727 |
| Listeria_monocytogenes_1639_v10                          | Listeria_ivanovii_subsp_londoniensis_202752_v1 | 0.8576 |
| Listeria_monocytogenes_1639_v109                         | Listeria_ivanovii_subsp_londoniensis_202752_v1 | 0.8719 |
| Listeria_monocytogenes_1639_v108                         | Listeria_ivanovii_subsp_londoniensis_202752_v1 | 0.8748 |
| Listeria_monocytogenes_1639_v107                         | Listeria_ivanovii_subsp_londoniensis_202752_v1 | 0.8824 |
| Listeria_monocytogenes_1639_v106                         | Listeria_ivanovii_subsp_londoniensis_202752_v1 | 0.8824 |
| Listeria_monocytogenes_1639_v105                         | Listeria_ivanovii_subsp_londoniensis_202752_v1 | 0.8827 |
| Listeria_monocytogenes_1639_v104                         | Listeria_ivanovii_subsp_londoniensis_202752_v1 | 0.8827 |
| Listeria_monocytogenes_1639_v103                         | Listeria_ivanovii_subsp_londoniensis_202752_v1 | 0.8726 |
| Listeria_monocytogenes_1639_v102                         | Listeria_ivanovii_subsp_londoniensis_202752_v1 | 0.8631 |
| Listeria_monocytogenes_1639_v101                         | Listeria_ivanovii_subsp_londoniensis_202752_v1 | 0.8621 |
| Listeria_monocytogenes_1639_v100                         | Listeria_ivanovii_subsp_londoniensis_202752_v1 | 0.883  |
| Listeria_monocytogenes_1639                              | Listeria_ivanovii_subsp_londoniensis_202752_v1 | 0.8756 |
| Listeria_monocytogenes_10403S_393133                     | Listeria_ivanovii_subsp_londoniensis_202752_v1 | 0.8626 |
| Listeria_monocytogenes_08-5923_637381                    | Listeria_ivanovii_subsp_londoniensis_202752_v1 | 0.8523 |
| Listeria_monocytogenes_08-5578_653938                    | Listeria_ivanovii_subsp_londoniensis_202752_v1 | 0.8833 |
| Listeria_monocytogenes_07PF0776_1126011                  | Listeria_ivanovii_subsp_londoniensis_202752_v1 | 0.8104 |
| Listeria_marthii_FSL_S4-120_702457                       | Listeria_ivanovii_subsp_londoniensis_202752_v1 | 0.8485 |
| Listeria_marthii_529731_v1                               | Listeria_ivanovii_subsp_londoniensis_202752_v1 | 0.8532 |
| Listeria_marthii_529731                                  | Listeria_ivanovii_subsp_londoniensis_202752_v1 | 0.8903 |
| Listeria_ivanovii_WSLC3009_1457190                       | Listeria_ivanovii_subsp_londoniensis_202752_v1 | 0.9535 |
| Listeria_ivanovii_subsp_londoniensis_202752_v2           | Listeria_ivanovii_subsp_londoniensis_202752_v1 | 0.0666 |
| Listeria_ivanovii_subsp_londoniensis_202752_v1           | Listeria_ivanovii_subsp_londoniensis_202752_v1 | 0.8683 |
| Listeria_welshimeri_1643                                 | Listeria_ivanovii_subsp_londoniensis_202752_v2 | 0.8676 |
| Listeria_welshimeri_serovar_6b_str_SLCC5334_386043       | Listeria_ivanovii_subsp_londoniensis_202752_v2 | 0.8828 |
| Listeria_seeligeri_serovar_1_2b_str_SLCC3954_683837      | Listeria_ivanovii_subsp_londoniensis_202752_v2 | 0.8218 |
| Listeria_seeligeri_FSL_S4-171_702452                     | Listeria_ivanovii_subsp_londoniensis_202752_v2 | 0.834  |
| Listeria_seeligeri_FSL_N1-067_702453                     | Listeria_ivanovii_subsp_londoniensis_202752_v2 | 0.9028 |
| Listeria_seeligeri_1640_v1                               | Listeria_ivanovii_subsp_londoniensis_202752_v2 | 0.8809 |
| Listeria_seeligeri_1640                                  | Listeria_ivanovii_subsp_londoniensis_202752_v2 | 0.8897 |
| Listeria_monocytogenes_WSLC1042_1457188                  | Listeria_ivanovii_subsp_londoniensis_202752_v2 | 0.8779 |
| Listeria_monocytogenes_WSLC1001_1457187                  | Listeria_ivanovii_subsp_londoniensis_202752_v2 | 0.8845 |
| Listeria_monocytogenes_SLCC7179_879090                   | Listeria_ivanovii_subsp_londoniensis_202752_v2 | 0.8827 |
| Listeria_monocytogenes_SLCC5850_882096                   | Listeria_ivanovii_subsp_londoniensis_202752_v2 | 0.883  |
| Listeria_monocytogenes_SLCC2755_932919                   | Listeria_ivanovii_subsp_londoniensis_202752_v2 | 0.8809 |
| Listeria_monocytogenes_SLCC2540_879089                   | Listeria_ivanovii_subsp_londoniensis_202752_v2 | 0.8781 |
| Listeria_monocytogenes_SLCC2479_882020                   | Listeria_ivanovii_subsp_londoniensis_202752_v2 | 0.8911 |
| Listeria_monocytogenes_SLCC2378_879088                   | Listeria_ivanovii_subsp_londoniensis_202752_v2 | 0.8895 |
| Listeria_monocytogenes_SLCC2376_882097                   | Listeria_ivanovii_subsp_londoniensis_202752_v2 | 0.8723 |
| Listeria_monocytogenes_SLCC2372_932920                   | Listeria_ivanovii_subsp_londoniensis_202752_v2 | 0.895  |
| Listeria_monocytogenes_serotype_4b_str_LL195_1230340     | Listeria_ivanovii_subsp_londoniensis_202752_v2 | 0.8578 |
| Listeria_monocytogenes_serotype_4b_str_LIS0087_1134669   | Listeria_ivanovii_subsp_londoniensis_202752_v2 | 0.895  |
| Listeria_monocytogenes_serotype_4b_str_F2365_265669      | Listeria_ivanovii_subsp_londoniensis_202752_v2 | 0.8956 |
| Listeria_monocytogenes_serotype_4b_str_CLIP_80459_568819 | Listeria_ivanovii_subsp_londoniensis_202752_v2 | 0.8802 |
| Listeria_monocytogenes_serotype_4b_str_81-0861_1196161   | Listeria_ivanovii_subsp_londoniensis_202752_v2 | 0.8812 |
| Listeria_monocytogenes_serotype_4b_str_81-0592_1196160   | Listeria_ivanovii_subsp_londoniensis_202752_v2 | 0.8823 |
| Listeria_monocytogenes_serotype_4b_str_81-0558_1196159   | Listeria_ivanovii_subsp_londoniensis_202752_v2 | 0.8816 |
| Listeria_monocytogenes_serotype_4b_str_10-0809_1196162   | Listeria_ivanovii_subsp_londoniensis_202752_v2 | 0.8962 |
| Listeria_monocytogenes_serotype_4b_str_02-6680_1196175   | Listeria_ivanovii_subsp_londoniensis_202752_v2 | 0.8962 |
| Listeria_monocytogenes_serotype_4b_str_02-6679_1196174   | Listeria_ivanovii_subsp_londoniensis_202752_v2 | 0.882  |
| Listeria_monocytogenes_serotype_4b_str_02-1792_1196173   | Listeria_ivanovii_subsp_londoniensis_202752_v2 | 0.882  |
| Listeria_monocytogenes_serotype_4b_str_02-1289_1196172   | Listeria_ivanovii_subsp_londoniensis_202752_v2 | 0.882  |
| Listeria_monocytogenes_serotype_4b_str_02-1103_1196171   | Listeria_ivanovii_subsp_londoniensis_202752_v2 | 0.8769 |
| Listeria_monocytogenes_serotype_3c_str_10-5027_1196195   | Listeria_ivanovii_subsp_londoniensis_202752_v2 | 0.878  |
| Listeria_monocytogenes_serotype_1_2c_str_10-5026_1196194 | Listeria_ivanovii_subsp_londoniensis_202752_v2 | 0.878  |
| Listeria_monocytogenes_serotype_1_2c_str_10-5025_1196193 | Listeria_ivanovii_subsp_londoniensis_202752_v2 | 0.8707 |
| Listeria_monocytogenes_serotype_1_2b_str_10-0811_1196164 | Listeria_ivanovii_subsp_londoniensis_202752_v2 | 0.8707 |
| Listeria_monocytogenes_serotype_1_2b_str_10-0810_1196163 | Listeria_ivanovii_subsp_londoniensis_202752_v2 | 0.8603 |
| Listeria_monocytogenes_serotype_1_2a_str_99-6370_1196179 | Listeria_ivanovii_subsp_londoniensis_202752_v2 | 0.8603 |
| Listeria_monocytogenes_serotype_1_2a_str_98-2035_1196178 | Listeria_ivanovii_subsp_londoniensis_202752_v2 | 0.8654 |
| Listeria_monocytogenes_serotype_1_2a_str_95-0093_1196177 | Listeria_ivanovii_subsp_londoniensis_202752_v2 | 0.8645 |
| Listeria_monocytogenes_serotype_1_2a_str_88-0478_1196176 | Listeria_ivanovii_subsp_londoniensis_202752_v2 | 0.8657 |
| Listeria_monocytogenes_serotype_1_2a_str_10-5024_1196192 | Listeria_ivanovii_subsp_londoniensis_202752_v2 | 0.8799 |
| Listeria_monocytogenes_serotype_1_2a_str_10-4758_1196168 | Listeria_ivanovii_subsp_londoniensis_202752_v2 | 0.8799 |
| Listeria_monocytogenes_serotype_1_2a_str_10-4754_1196167 | Listeria_ivanovii_subsp_londoniensis_202752_v2 | 0.8657 |
| Listeria_monocytogenes_serotype_1_2a_str_10-1321_1196191 | Listeria_ivanovii_subsp_londoniensis_202752_v2 | 0.866  |
| Listeria_monocytogenes_serotype_1_2a_str_10-1047_1196190 | Listeria_ivanovii_subsp_londoniensis_202752_v2 | 0.866  |
| Listeria_monocytogenes_serotype_1_2a_str_10-1046_1196189 | Listeria_ivanovii_subsp_londoniensis_202752_v2 | 0.8926 |
| Listeria_monocytogenes_serotype_1_2a_str_10-0934_1196170 | Listeria_ivanovii_subsp_londoniensis_202752_v2 | 0.8926 |
| Listeria_monocytogenes_serotype_1_2a_str_10-0933_1196169 | Listeria_ivanovii_subsp_londoniensis_202752_v2 | 0.8616 |
| Listeria_monocytogenes_serotype_1_2a_str_10-0815_1196188 | Listeria_ivanovii_subsp_londoniensis_202752_v2 | 0.8654 |
| Listeria_monocytogenes_serotype_1_2a_str_10-0814_1196187 | Listeria_ivanovii_subsp_londoniensis_202752_v2 | 0.875  |
| Listeria_monocytogenes_serotype_1_2a_str_10-0813_1196166 | Listeria_ivanovii_subsp_londoniensis_202752_v2 | 0.875  |
| Listeria_monocytogenes_serotype_1_2a_str_10-0812_1196165 | Listeria_ivanovii_subsp_londoniensis_202752_v2 | 0.8746 |
| Listeria_monocytogenes_serotype_1_2a_str_08-7669_1196186 | Listeria_ivanovii_subsp_londoniensis_202752_v2 | 0.8657 |
| Listeria_monocytogenes_serotype_1_2a_str_08-7374_1196185 |                                                |        |

|                                                          |                                                |        |
|----------------------------------------------------------|------------------------------------------------|--------|
| Listeria_monocytogenes_serotype_1_2a_str_08-6997_1196184 | Listeria_ivanovii_subsp_londoniensis_202752_v2 | 0.8616 |
| Listeria_monocytogenes_serotype_1_2a_str_08-6569_1196183 | Listeria_ivanovii_subsp_londoniensis_202752_v2 | 0.8616 |
| Listeria_monocytogenes_serotype_1_2a_str_08-6056_1196182 | Listeria_ivanovii_subsp_londoniensis_202752_v2 | 0.8616 |
| Listeria_monocytogenes_serotype_1_2a_str_04-5457_1196181 | Listeria_ivanovii_subsp_londoniensis_202752_v2 | 0.8657 |
| Listeria_monocytogenes_serotype_1_2a_str_02-5993_1196180 | Listeria_ivanovii_subsp_londoniensis_202752_v2 | 0.8654 |
| Listeria_monocytogenes_R479a_1437838                     | Listeria_ivanovii_subsp_londoniensis_202752_v2 | 0.8659 |
| Listeria_monocytogenes_N53-1_1234142                     | Listeria_ivanovii_subsp_londoniensis_202752_v2 | 0.845  |
| Listeria_monocytogenes_M7_1030009                        | Listeria_ivanovii_subsp_londoniensis_202752_v2 | 0.8566 |
| Listeria_monocytogenes_LO28_393132                       | Listeria_ivanovii_subsp_londoniensis_202752_v2 | 0.8767 |
| Listeria_monocytogenes_L99_563174                        | Listeria_ivanovii_subsp_londoniensis_202752_v2 | 0.8569 |
| Listeria_monocytogenes_L312_882094                       | Listeria_ivanovii_subsp_londoniensis_202752_v2 | 0.8956 |
| Listeria_monocytogenes_J1816_930781                      | Listeria_ivanovii_subsp_londoniensis_202752_v2 | 0.8768 |
| Listeria_monocytogenes_J1-220_930782                     | Listeria_ivanovii_subsp_londoniensis_202752_v2 | 0.8739 |
| Listeria_monocytogenes_J0161_393130                      | Listeria_ivanovii_subsp_londoniensis_202752_v2 | 0.8748 |
| Listeria_monocytogenes_HCC23_552536                      | Listeria_ivanovii_subsp_londoniensis_202752_v2 | 0.8566 |
| Listeria_monocytogenes_FSL_R2-561_393126                 | Listeria_ivanovii_subsp_londoniensis_202752_v2 | 0.8767 |
| Listeria_monocytogenes_FSL_J1-208_393119                 | Listeria_ivanovii_subsp_londoniensis_202752_v2 | 0.8754 |
| Listeria_monocytogenes_FSL_J1-175_393118                 | Listeria_ivanovii_subsp_londoniensis_202752_v2 | 0.8847 |
| Listeria_monocytogenes_Finland_1998_393127               | Listeria_ivanovii_subsp_londoniensis_202752_v2 | 0.8949 |
| Listeria_monocytogenes_EGD-e_169963_v1                   | Listeria_ivanovii_subsp_londoniensis_202752_v2 | 0.8808 |
| Listeria_monocytogenes_EGD-e_169963                      | Listeria_ivanovii_subsp_londoniensis_202752_v2 | 0.8808 |
| Listeria_monocytogenes_EGD_1334565                       | Listeria_ivanovii_subsp_londoniensis_202752_v2 | 0.8831 |
| Listeria_monocytogenes_CFSAN002349_1299895               | Listeria_ivanovii_subsp_londoniensis_202752_v2 | 0.896  |
| Listeria_monocytogenes_ATCC_19117_882095_v1              | Listeria_ivanovii_subsp_londoniensis_202752_v2 | 0.8927 |
| Listeria_monocytogenes_ATCC_19117_882095                 | Listeria_ivanovii_subsp_londoniensis_202752_v2 | 0.8926 |
| Listeria_monocytogenes_6179_1288295                      | Listeria_ivanovii_subsp_londoniensis_202752_v2 | 0.8621 |
| Listeria_monocytogenes_1639_v9                           | Listeria_ivanovii_subsp_londoniensis_202752_v2 | 0.8573 |
| Listeria_monocytogenes_1639_v99                          | Listeria_ivanovii_subsp_londoniensis_202752_v2 | 0.8783 |
| Listeria_monocytogenes_1639_v98                          | Listeria_ivanovii_subsp_londoniensis_202752_v2 | 0.8705 |
| Listeria_monocytogenes_1639_v97                          | Listeria_ivanovii_subsp_londoniensis_202752_v2 | 0.8838 |
| Listeria_monocytogenes_1639_v96                          | Listeria_ivanovii_subsp_londoniensis_202752_v2 | 0.8773 |
| Listeria_monocytogenes_1639_v95                          | Listeria_ivanovii_subsp_londoniensis_202752_v2 | 0.8774 |
| Listeria_monocytogenes_1639_v94                          | Listeria_ivanovii_subsp_londoniensis_202752_v2 | 0.8777 |
| Listeria_monocytogenes_1639_v93                          | Listeria_ivanovii_subsp_londoniensis_202752_v2 | 0.8702 |
| Listeria_monocytogenes_1639_v92                          | Listeria_ivanovii_subsp_londoniensis_202752_v2 | 0.878  |
| Listeria_monocytogenes_1639_v91                          | Listeria_ivanovii_subsp_londoniensis_202752_v2 | 0.8774 |
| Listeria_monocytogenes_1639_v90                          | Listeria_ivanovii_subsp_londoniensis_202752_v2 | 0.8705 |
| Listeria_monocytogenes_1639_v8                           | Listeria_ivanovii_subsp_londoniensis_202752_v2 | 0.8607 |
| Listeria_monocytogenes_1639_v89                          | Listeria_ivanovii_subsp_londoniensis_202752_v2 | 0.8894 |
| Listeria_monocytogenes_1639_v88                          | Listeria_ivanovii_subsp_londoniensis_202752_v2 | 0.8743 |
| Listeria_monocytogenes_1639_v87                          | Listeria_ivanovii_subsp_londoniensis_202752_v2 | 0.8703 |
| Listeria_monocytogenes_1639_v86                          | Listeria_ivanovii_subsp_londoniensis_202752_v2 | 0.87   |
| Listeria_monocytogenes_1639_v85                          | Listeria_ivanovii_subsp_londoniensis_202752_v2 | 0.88   |
| Listeria_monocytogenes_1639_v84                          | Listeria_ivanovii_subsp_londoniensis_202752_v2 | 0.8774 |
| Listeria_monocytogenes_1639_v83                          | Listeria_ivanovii_subsp_londoniensis_202752_v2 | 0.8822 |
| Listeria_monocytogenes_1639_v82                          | Listeria_ivanovii_subsp_londoniensis_202752_v2 | 0.8819 |
| Listeria_monocytogenes_1639_v81                          | Listeria_ivanovii_subsp_londoniensis_202752_v2 | 0.8762 |
| Listeria_monocytogenes_1639_v80                          | Listeria_ivanovii_subsp_londoniensis_202752_v2 | 0.8748 |
| Listeria_monocytogenes_1639_v7                           | Listeria_ivanovii_subsp_londoniensis_202752_v2 | 0.8607 |
| Listeria_monocytogenes_1639_v79                          | Listeria_ivanovii_subsp_londoniensis_202752_v2 | 0.8742 |
| Listeria_monocytogenes_1639_v78                          | Listeria_ivanovii_subsp_londoniensis_202752_v2 | 0.8755 |
| Listeria_monocytogenes_1639_v77                          | Listeria_ivanovii_subsp_londoniensis_202752_v2 | 0.8788 |
| Listeria_monocytogenes_1639_v76                          | Listeria_ivanovii_subsp_londoniensis_202752_v2 | 0.8648 |
| Listeria_monocytogenes_1639_v75                          | Listeria_ivanovii_subsp_londoniensis_202752_v2 | 0.8569 |
| Listeria_monocytogenes_1639_v74                          | Listeria_ivanovii_subsp_londoniensis_202752_v2 | 0.8711 |
| Listeria_monocytogenes_1639_v73                          | Listeria_ivanovii_subsp_londoniensis_202752_v2 | 0.8736 |
| Listeria_monocytogenes_1639_v72                          | Listeria_ivanovii_subsp_londoniensis_202752_v2 | 0.8809 |
| Listeria_monocytogenes_1639_v71                          | Listeria_ivanovii_subsp_londoniensis_202752_v2 | 0.8631 |
| Listeria_monocytogenes_1639_v70                          | Listeria_ivanovii_subsp_londoniensis_202752_v2 | 0.8751 |
| Listeria_monocytogenes_1639_v6                           | Listeria_ivanovii_subsp_londoniensis_202752_v2 | 0.8604 |
| Listeria_monocytogenes_1639_v69                          | Listeria_ivanovii_subsp_londoniensis_202752_v2 | 0.8816 |
| Listeria_monocytogenes_1639_v68                          | Listeria_ivanovii_subsp_londoniensis_202752_v2 | 0.8818 |
| Listeria_monocytogenes_1639_v67                          | Listeria_ivanovii_subsp_londoniensis_202752_v2 | 0.8773 |
| Listeria_monocytogenes_1639_v66                          | Listeria_ivanovii_subsp_londoniensis_202752_v2 | 0.8796 |
| Listeria_monocytogenes_1639_v65                          | Listeria_ivanovii_subsp_londoniensis_202752_v2 | 0.8687 |
| Listeria_monocytogenes_1639_v64                          | Listeria_ivanovii_subsp_londoniensis_202752_v2 | 0.8737 |
| Listeria_monocytogenes_1639_v63                          | Listeria_ivanovii_subsp                        |        |

[illegible]

Listeria\_monocytogenes\_1639\_v138  
Listeria\_monocytogenes\_1639\_v137  
Listeria\_monocytogenes\_1639\_v136  
Listeria\_monocytogenes\_1639\_v135  
Listeria\_monocytogenes\_1639\_v134  
Listeria\_monocytogenes\_1639\_v133  
Listeria\_monocytogenes\_1639\_v132  
Listeria\_monocytogenes\_1639\_v131  
Listeria\_monocytogenes\_1639\_v130  
Listeria\_monocytogenes\_1639\_v12  
Listeria\_monocytogenes\_1639\_v129  
Listeria\_monocytogenes\_1639\_v128  
Listeria\_monocytogenes\_1639\_v127  
Listeria\_monocytogenes\_1639\_v126  
Listeria\_monocytogenes\_1639\_v125  
Listeria\_monocytogenes\_1639\_v124  
Listeria\_monocytogenes\_1639\_v123  
Listeria\_monocytogenes\_1639\_v122  
Listeria\_monocytogenes\_1639\_v121  
Listeria\_monocytogenes\_1639\_v120  
Listeria\_monocytogenes\_1639\_v11  
Listeria\_monocytogenes\_1639\_v119  
Listeria\_monocytogenes\_1639\_v118  
Listeria\_monocytogenes\_1639\_v117  
Listeria\_monocytogenes\_1639\_v116  
Listeria\_monocytogenes\_1639\_v115  
Listeria\_monocytogenes\_1639\_v114  
Listeria\_monocytogenes\_1639\_v113  
Listeria\_monocytogenes\_1639\_v112  
Listeria\_monocytogenes\_1639\_v111  
Listeria\_monocytogenes\_1639\_v110  
Listeria\_monocytogenes\_1639\_v10  
Listeria\_monocytogenes\_1639\_v109  
Listeria\_monocytogenes\_1639\_v108  
Listeria\_monocytogenes\_1639\_v107  
Listeria\_monocytogenes\_1639\_v106  
Listeria\_monocytogenes\_1639\_v105  
Listeria\_monocytogenes\_1639\_v104  
Listeria\_monocytogenes\_1639\_v103  
Listeria\_monocytogenes\_1639\_v102  
Listeria\_monocytogenes\_1639\_v101  
Listeria\_monocytogenes\_1639\_v100  
Listeria\_monocytogenes\_1639  
Listeria\_monocytogenes\_10403S\_393133  
Listeria\_monocytogenes\_08-5923\_637381  
Listeria\_monocytogenes\_08-5578\_653938  
Listeria\_monocytogenes\_07PF0776\_1126011  
Listeria\_marthii\_FSL\_S4-120\_702457  
Listeria\_marthii\_529731\_v1  
Listeria\_marthii\_529731  
Listeria\_ivanovii\_WSLC3009\_1457190  
Listeria\_ivanovii\_subsp\_londoniensis\_202752\_v2  
Listeria\_welshimeri\_1643  
Listeria\_welshimeri\_serovar\_6b\_str\_SLCC5334\_386043  
Listeria\_seeligeri\_serovar\_1\_2b\_str\_SLCC3954\_683837  
Listeria\_seeligeri\_FSL\_S4-171\_702452  
Listeria\_seeligeri\_FSL\_N1-067\_702453  
Listeria\_seeligeri\_1640\_v1  
Listeria\_seeligeri\_1640  
Listeria\_monocytogenes\_WSLC1042\_1457188  
Listeria\_monocytogenes\_WSLC1001\_1457187  
Listeria\_monocytogenes\_SLCC7179\_879090  
Listeria\_monocytogenes\_SLCC5850\_882096  
Listeria\_monocytogenes\_SLCC2755\_932919  
Listeria\_monocytogenes\_SLCC2540\_879089  
Listeria\_monocytogenes\_SLCC2479\_882020  
Listeria\_monocytogenes\_SLCC2378\_879088  
Listeria\_monocytogenes\_SLCC2376\_882097  
Listeria\_monocytogenes\_SLCC2372\_932920  
Listeria\_monocytogenes\_serotype\_4b\_str\_LL195\_1230340  
Listeria\_monocytogenes\_serotype\_4b\_str\_LIS0087\_1134669  
Listeria\_monocytogenes\_serotype\_4b\_str\_F2365\_265669  
Listeria\_monocytogenes\_serotype\_4b\_str\_CLIP\_80459\_568819  
Listeria\_monocytogenes\_serotype\_4b\_str\_81-0861\_1196161  
Listeria\_monocytogenes\_serotype\_4b\_str\_81-0592\_1196160  
Listeria\_monocytogenes\_serotype\_4b\_str\_81-0558\_1196159  
Listeria\_monocytogenes\_serotype\_4b\_str\_10-0809\_1196162  
Listeria\_monocytogenes\_serotype\_4b\_str\_02-6680\_1196175  
Listeria\_monocytogenes\_serotype\_4b\_str\_02-6679\_1196174  
Listeria\_monocytogenes\_serotype\_4b\_str\_02-1792\_1196173  
Listeria\_monocytogenes\_serotype\_4b\_str\_02-1289\_1196172  
Listeria\_monocytogenes\_serotype\_4b\_str\_02-1103\_1196171  
Listeria\_monocytogenes\_serotype\_3c\_str\_10-5027\_1196195  
Listeria\_monocytogenes\_serotype\_1\_2c\_str\_10-5026\_1196194  
Listeria\_monocytogenes\_serotype\_1\_2c\_str\_10-5025\_1196193  
Listeria\_monocytogenes\_serotype\_1\_2b\_str\_10-0811\_1196164  
Listeria\_monocytogenes\_serotype\_1\_2b\_str\_10-0810\_1196163  
Listeria\_monocytogenes\_serotype\_1\_2a\_str\_99-6370\_1196179  
Listeria\_monocytogenes\_serotype\_1\_2a\_str\_98-2035\_1196178  
Listeria\_monocytogenes\_serotype\_1\_2a\_str\_95-0093\_1196177  
Listeria\_monocytogenes\_serotype\_1\_2a\_str\_88-0478\_1196176

Listeria\_ivanovii\_subsp\_londoniensis\_202752\_v2 0.8961  
Listeria\_ivanovii\_subsp\_londoniensis\_202752\_v2 0.8953  
Listeria\_ivanovii\_subsp\_londoniensis\_202752\_v2 0.8792  
Listeria\_ivanovii\_subsp\_londoniensis\_202752\_v2 0.8679  
Listeria\_ivanovii\_subsp\_londoniensis\_202752\_v2 0.8911  
Listeria\_ivanovii\_subsp\_londoniensis\_202752\_v2 0.8852  
Listeria\_ivanovii\_subsp\_londoniensis\_202752\_v2 0.8659  
Listeria\_ivanovii\_subsp\_londoniensis\_202752\_v2 0.8825  
Listeria\_ivanovii\_subsp\_londoniensis\_202752\_v2 0.8796  
Listeria\_ivanovii\_subsp\_londoniensis\_202752\_v2 0.8601  
Listeria\_ivanovii\_subsp\_londoniensis\_202752\_v2 0.891  
Listeria\_ivanovii\_subsp\_londoniensis\_202752\_v2 0.8902  
Listeria\_ivanovii\_subsp\_londoniensis\_202752\_v2 0.8812  
Listeria\_ivanovii\_subsp\_londoniensis\_202752\_v2 0.8894  
Listeria\_ivanovii\_subsp\_londoniensis\_202752\_v2 0.8814  
Listeria\_ivanovii\_subsp\_londoniensis\_202752\_v2 0.8834  
Listeria\_ivanovii\_subsp\_londoniensis\_202752\_v2 0.896  
Listeria\_ivanovii\_subsp\_londoniensis\_202752\_v2 0.8959  
Listeria\_ivanovii\_subsp\_londoniensis\_202752\_v2 0.8959  
Listeria\_ivanovii\_subsp\_londoniensis\_202752\_v2 0.896  
Listeria\_ivanovii\_subsp\_londoniensis\_202752\_v2 0.8591  
Listeria\_ivanovii\_subsp\_londoniensis\_202752\_v2 0.8959  
Listeria\_ivanovii\_subsp\_londoniensis\_202752\_v2 0.8959  
Listeria\_ivanovii\_subsp\_londoniensis\_202752\_v2 0.8811  
Listeria\_ivanovii\_subsp\_londoniensis\_202752\_v2 0.8904  
Listeria\_ivanovii\_subsp\_londoniensis\_202752\_v2 0.8907  
Listeria\_ivanovii\_subsp\_londoniensis\_202752\_v2 0.8759  
Listeria\_ivanovii\_subsp\_londoniensis\_202752\_v2 0.8852  
Listeria\_ivanovii\_subsp\_londoniensis\_202752\_v2 0.8858  
Listeria\_ivanovii\_subsp\_londoniensis\_202752\_v2 0.8859  
Listeria\_ivanovii\_subsp\_londoniensis\_202752\_v2 0.8756  
Listeria\_ivanovii\_subsp\_londoniensis\_202752\_v2 0.8551  
Listeria\_ivanovii\_subsp\_londoniensis\_202752\_v2 0.8756  
Listeria\_ivanovii\_subsp\_londoniensis\_202752\_v2 0.8831  
Listeria\_ivanovii\_subsp\_londoniensis\_202752\_v2 0.8917  
Listeria\_ivanovii\_subsp\_londoniensis\_202752\_v2 0.8917  
Listeria\_ivanovii\_subsp\_londoniensis\_202752\_v2 0.892  
Listeria\_ivanovii\_subsp\_londoniensis\_202752\_v2 0.892  
Listeria\_ivanovii\_subsp\_londoniensis\_202752\_v2 0.892  
Listeria\_ivanovii\_subsp\_londoniensis\_202752\_v2 0.8759  
Listeria\_ivanovii\_subsp\_londoniensis\_202752\_v2 0.8659  
Listeria\_ivanovii\_subsp\_londoniensis\_202752\_v2 0.8649  
Listeria\_ivanovii\_subsp\_londoniensis\_202752\_v2 0.894  
Listeria\_ivanovii\_subsp\_londoniensis\_202752\_v2 0.886  
Listeria\_ivanovii\_subsp\_londoniensis\_202752\_v2 0.8657  
Listeria\_ivanovii\_subsp\_londoniensis\_202752\_v2 0.8538  
Listeria\_ivanovii\_subsp\_londoniensis\_202752\_v2 0.8942  
Listeria\_ivanovii\_subsp\_londoniensis\_202752\_v2 0.8169  
Listeria\_ivanovii\_subsp\_londoniensis\_202752\_v2 0.8576  
Listeria\_ivanovii\_subsp\_londoniensis\_202752\_v2 0.8647  
Listeria\_ivanovii\_subsp\_londoniensis\_202752\_v2 0.9013  
Listeria\_ivanovii\_subsp\_londoniensis\_202752\_v2 0.0644  
Listeria\_ivanovii\_WSLC3009\_1457190 0.8612  
Listeria\_ivanovii\_WSLC3009\_1457190 0.8608  
Listeria\_ivanovii\_WSLC3009\_1457190 0.8822  
Listeria\_ivanovii\_WSLC3009\_1457190 0.8184  
Listeria\_ivanovii\_WSLC3009\_1457190 0.825  
Listeria\_ivanovii\_WSLC3009\_1457190 0.8907  
Listeria\_ivanovii\_WSLC3009\_1457190 0.8758  
Listeria\_ivanovii\_WSLC3009\_1457190 0.8979  
Listeria\_ivanovii\_WSLC3009\_1457190 0.8809  
Listeria\_ivanovii\_WSLC3009\_1457190 0.8882  
Listeria\_ivanovii\_WSLC3009\_1457190 0.8857  
Listeria\_ivanovii\_WSLC3009\_1457190 0.8874  
Listeria\_ivanovii\_WSLC3009\_1457190 0.8899  
Listeria\_ivanovii\_WSLC3009\_1457190 0.8794  
Listeria\_ivanovii\_WSLC3009\_1457190 0.899  
Listeria\_ivanovii\_WSLC3009\_1457190 0.8971  
Listeria\_ivanovii\_WSLC3009\_1457190 0.8721  
Listeria\_ivanovii\_WSLC3009\_1457190 0.9049  
Listeria\_ivanovii\_WSLC3009\_1457190 0.8618  
Listeria\_ivanovii\_WSLC3009\_1457190 0.9049  
Listeria\_ivanovii\_WSLC3009\_1457190 0.9036  
Listeria\_ivanovii\_WSLC3009\_1457190 0.8883  
Listeria\_ivanovii\_WSLC3009\_1457190 0.8894  
Listeria\_ivanovii\_WSLC3009\_1457190 0.8901  
Listeria\_ivanovii\_WSLC3009\_1457190 0.8898  
Listeria\_ivanovii\_WSLC3009\_1457190 0.9022  
Listeria\_ivanovii\_WSLC3009\_1457190 0.9022  
Listeria\_ivanovii\_WSLC3009\_1457190 0.8898  
Listeria\_ivanovii\_WSLC3009\_1457190 0.8898  
Listeria\_ivanovii\_WSLC3009\_1457190 0.8898  
Listeria\_ivanovii\_WSLC3009\_1457190 0.8782  
Listeria\_ivanovii\_WSLC3009\_1457190 0.879  
Listeria\_ivanovii\_WSLC3009\_1457190 0.879  
Listeria\_ivanovii\_WSLC3009\_1457190 0.8791  
Listeria\_ivanovii\_WSLC3009\_1457190 0.8791  
Listeria\_ivanovii\_WSLC3009\_1457190 0.8657  
Listeria\_ivanovii\_WSLC3009\_1457190 0.8657  
Listeria\_ivanovii\_WSLC3009\_1457190 0.8708  
Listeria\_ivanovii\_WSLC3009\_1457190 0.8696



|                                                          |                                    |        |
|----------------------------------------------------------|------------------------------------|--------|
| Listeria_monocytogenes_serotype_1_2a_str_10-5024_1196192 | Listeria_ivanovii_WSLC3009_1457190 | 0.8708 |
| Listeria_monocytogenes_serotype_1_2a_str_10-4758_1196168 | Listeria_ivanovii_WSLC3009_1457190 | 0.8851 |
| Listeria_monocytogenes_serotype_1_2a_str_10-4754_1196167 | Listeria_ivanovii_WSLC3009_1457190 | 0.8854 |
| Listeria_monocytogenes_serotype_1_2a_str_10-1321_1196191 | Listeria_ivanovii_WSLC3009_1457190 | 0.8708 |
| Listeria_monocytogenes_serotype_1_2a_str_10-1047_1196190 | Listeria_ivanovii_WSLC3009_1457190 | 0.8715 |
| Listeria_monocytogenes_serotype_1_2a_str_10-1046_1196189 | Listeria_ivanovii_WSLC3009_1457190 | 0.8715 |
| Listeria_monocytogenes_serotype_1_2a_str_10-0934_1196170 | Listeria_ivanovii_WSLC3009_1457190 | 0.8955 |
| Listeria_monocytogenes_serotype_1_2a_str_10-0933_1196169 | Listeria_ivanovii_WSLC3009_1457190 | 0.8955 |
| Listeria_monocytogenes_serotype_1_2a_str_10-0815_1196188 | Listeria_ivanovii_WSLC3009_1457190 | 0.867  |
| Listeria_monocytogenes_serotype_1_2a_str_10-0814_1196187 | Listeria_ivanovii_WSLC3009_1457190 | 0.8712 |
| Listeria_monocytogenes_serotype_1_2a_str_10-0813_1196166 | Listeria_ivanovii_WSLC3009_1457190 | 0.8786 |
| Listeria_monocytogenes_serotype_1_2a_str_10-0812_1196165 | Listeria_ivanovii_WSLC3009_1457190 | 0.8786 |
| Listeria_monocytogenes_serotype_1_2a_str_08-7669_1196186 | Listeria_ivanovii_WSLC3009_1457190 | 0.8793 |
| Listeria_monocytogenes_serotype_1_2a_str_08-7374_1196185 | Listeria_ivanovii_WSLC3009_1457190 | 0.8708 |
| Listeria_monocytogenes_serotype_1_2a_str_08-6997_1196184 | Listeria_ivanovii_WSLC3009_1457190 | 0.867  |
| Listeria_monocytogenes_serotype_1_2a_str_08-6569_1196183 | Listeria_ivanovii_WSLC3009_1457190 | 0.867  |
| Listeria_monocytogenes_serotype_1_2a_str_08-6056_1196182 | Listeria_ivanovii_WSLC3009_1457190 | 0.867  |
| Listeria_monocytogenes_serotype_1_2a_str_04-5457_1196181 | Listeria_ivanovii_WSLC3009_1457190 | 0.8708 |
| Listeria_monocytogenes_serotype_1_2a_str_02-5993_1196180 | Listeria_ivanovii_WSLC3009_1457190 | 0.8708 |
| Listeria_monocytogenes_R479a_1437838                     | Listeria_ivanovii_WSLC3009_1457190 | 0.8705 |
| Listeria_monocytogenes_N53-1_1234142                     | Listeria_ivanovii_WSLC3009_1457190 | 0.8496 |
| Listeria_monocytogenes_M7_1030009                        | Listeria_ivanovii_WSLC3009_1457190 | 0.8605 |
| Listeria_monocytogenes_LO28_393132                       | Listeria_ivanovii_WSLC3009_1457190 | 0.8781 |
| Listeria_monocytogenes_L99_563174                        | Listeria_ivanovii_WSLC3009_1457190 | 0.8608 |
| Listeria_monocytogenes_L312_882094                       | Listeria_ivanovii_WSLC3009_1457190 | 0.9036 |
| Listeria_monocytogenes_J1816_930781                      | Listeria_ivanovii_WSLC3009_1457190 | 0.8808 |
| Listeria_monocytogenes_J1-220_930782                     | Listeria_ivanovii_WSLC3009_1457190 | 0.8786 |
| Listeria_monocytogenes_J0161_393130                      | Listeria_ivanovii_WSLC3009_1457190 | 0.8777 |
| Listeria_monocytogenes_HCC23_552536                      | Listeria_ivanovii_WSLC3009_1457190 | 0.8605 |
| Listeria_monocytogenes_FSL_R2-561_393126                 | Listeria_ivanovii_WSLC3009_1457190 | 0.8776 |
| Listeria_monocytogenes_FSL_J1-208_393119                 | Listeria_ivanovii_WSLC3009_1457190 | 0.8741 |
| Listeria_monocytogenes_FSL_J1-175_393118                 | Listeria_ivanovii_WSLC3009_1457190 | 0.8945 |
| Listeria_monocytogenes_Finland_1998_393127               | Listeria_ivanovii_WSLC3009_1457190 | 0.8966 |
| Listeria_monocytogenes_EGD-e_169963_v1                   | Listeria_ivanovii_WSLC3009_1457190 | 0.886  |
| Listeria_monocytogenes_EGD-e_169963                      | Listeria_ivanovii_WSLC3009_1457190 | 0.8863 |
| Listeria_monocytogenes_EGD_1334565                       | Listeria_ivanovii_WSLC3009_1457190 | 0.886  |
| Listeria_monocytogenes_CFSAN002349_1299895               | Listeria_ivanovii_WSLC3009_1457190 | 0.8997 |
| Listeria_monocytogenes_ATCC_19117_882095_v1              | Listeria_ivanovii_WSLC3009_1457190 | 0.8975 |
| Listeria_monocytogenes_ATCC_19117_882095                 | Listeria_ivanovii_WSLC3009_1457190 | 0.8971 |
| Listeria_monocytogenes_6179_1288295                      | Listeria_ivanovii_WSLC3009_1457190 | 0.8623 |
| Listeria_monocytogenes_1639_v9                           | Listeria_ivanovii_WSLC3009_1457190 | 0.8671 |
| Listeria_monocytogenes_1639_v99                          | Listeria_ivanovii_WSLC3009_1457190 | 0.8808 |
| Listeria_monocytogenes_1639_v98                          | Listeria_ivanovii_WSLC3009_1457190 | 0.8764 |
| Listeria_monocytogenes_1639_v97                          | Listeria_ivanovii_WSLC3009_1457190 | 0.8928 |
| Listeria_monocytogenes_1639_v96                          | Listeria_ivanovii_WSLC3009_1457190 | 0.8802 |
| Listeria_monocytogenes_1639_v95                          | Listeria_ivanovii_WSLC3009_1457190 | 0.8802 |
| Listeria_monocytogenes_1639_v94                          | Listeria_ivanovii_WSLC3009_1457190 | 0.8805 |
| Listeria_monocytogenes_1639_v93                          | Listeria_ivanovii_WSLC3009_1457190 | 0.8734 |
| Listeria_monocytogenes_1639_v92                          | Listeria_ivanovii_WSLC3009_1457190 | 0.8805 |
| Listeria_monocytogenes_1639_v91                          | Listeria_ivanovii_WSLC3009_1457190 | 0.8871 |
| Listeria_monocytogenes_1639_v90                          | Listeria_ivanovii_WSLC3009_1457190 | 0.8764 |
| Listeria_monocytogenes_1639_v8                           | Listeria_ivanovii_WSLC3009_1457190 | 0.8602 |
| Listeria_monocytogenes_1639_v89                          | Listeria_ivanovii_WSLC3009_1457190 | 0.8935 |
| Listeria_monocytogenes_1639_v88                          | Listeria_ivanovii_WSLC3009_1457190 | 0.8776 |
| Listeria_monocytogenes_1639_v87                          | Listeria_ivanovii_WSLC3009_1457190 | 0.8732 |
| Listeria_monocytogenes_1639_v86                          | Listeria_ivanovii_WSLC3009_1457190 | 0.8735 |
| Listeria_monocytogenes_1639_v85                          | Listeria_ivanovii_WSLC3009_1457190 | 0.8877 |
| Listeria_monocytogenes_1639_v84                          | Listeria_ivanovii_WSLC3009_1457190 | 0.8796 |
| Listeria_monocytogenes_1639_v83                          | Listeria_ivanovii_WSLC3009_1457190 | 0.8869 |
| Listeria_monocytogenes_1639_v82                          | Listeria_ivanovii_WSLC3009_1457190 | 0.8863 |
| Listeria_monocytogenes_1639_v81                          | Listeria_ivanovii_WSLC3009_1457190 | 0.8779 |
| Listeria_monocytogenes_1639_v80                          | Listeria_ivanovii_WSLC3009_1457190 | 0.8834 |
| Listeria_monocytogenes_1639_v7                           | Listeria_ivanovii_WSLC3009_1457190 | 0.8602 |
| Listeria_monocytogenes_1639_v79                          | Listeria_ivanovii_WSLC3009_1457190 | 0.8763 |
| Listeria_monocytogenes_1639_v78                          | Listeria_ivanovii_WSLC3009_1457190 | 0.8773 |
| Listeria_monocytogenes_1639_v77                          | Listeria_ivanovii_WSLC3009_1457190 | 0.8794 |
| Listeria_monocytogenes_1639_v76                          | Listeria_ivanovii_WSLC3009_1457190 | 0.8699 |
| Listeria_monocytogenes_1639_v75                          | Listeria_ivanovii_WSLC3009_1457190 | 0.8608 |
| Listeria_monocytogenes_1639_v74                          | Listeria_ivanovii_WSLC3009_1457190 | 0.8743 |
| Listeria_monocytogenes_1639_v73                          | Listeria_ivanovii_WSLC3009_1457190 | 0.8735 |
| Listeria_monocytogenes_1639_v72                          | Listeria_ivanovii_WSLC3009_1457190 | 0.8857 |
| Listeria_monocytogenes_1639_v71                          | Listeria_ivanovii_WSLC3009_1457190 | 0.8644 |
| Listeria_monocytogenes_1639_v70                          | Listeria_ivanovii_WSLC3009_1457190 | 0.8758 |
| Listeria_monocytogenes_1639_v6                           | Listeria_ivanovii_WSLC3009_1457190 | 0.8598 |
| Listeria_monocytogenes_1639_v69                          | Listeria_ivanovii_WSLC3009_1457190 | 0.8894 |
| Listeria_monocytogenes_1639_v68                          | Listeria_ivanovii_WSLC3009_1457190 | 0.8817 |
| Listeria_monocytogenes_1639_v67                          | Listeria_ivanovii_WSLC3009_1457190 | 0.8863 |
| Listeria_monocytogenes_1639_v66                          | Listeria_ivanovii_WSLC3009_1457190 | 0.8848 |
| Listeria_monocytogenes_1639_v65                          | Listeria_ivanovii_WSLC3009_1457190 | 0.8738 |
| Listeria_monocytogenes_1639_v64                          | Listeria_ivanovii_WSLC3009_1457190 | 0.8766 |
| Listeria_monocytogenes_1639_v63                          | Listeria_ivanovii_WSLC3009_1457190 | 0.8801 |
| Listeria_monocytogenes_1639_v62                          | Listeria_ivanovii_WSLC3009_1457190 | 0.874  |
| Listeria_monocytogenes_1639_v61                          | Listeria_ivanovii_WSLC3009_1457190 | 0.8734 |
| Listeria_monocytogenes_1639_v60                          | Listeria_ivanovii_WSLC3009_1457190 | 0.879  |
| Listeria_monocytogenes_1639_v5                           | Listeria_ivanovii_WSLC3009_1457190 | 0.8475 |
| Listeria_monocytogenes_1639_v59                          | Listeria_ivanovii_WSLC3009_1457190 | 0.8873 |
| Listeria_monocytogenes_1639_v58                          | Listeria_ivanovii_WSLC3009_1457190 | 0.8903 |
| Listeria_monocytogenes_1639_v57                          | Listeria_ivanovii_WSLC3009_1457190 | 0.8773 |
| Listeria_monocytogenes_1639_v56                          | Listeria_ivanovii_WSLC3009_1457190 | 0.8873 |
| Listeria_monocytogenes_1639_v55                          | Listeria_ivanovii_WSLC3009_1457190 | 0.8733 |
| Listeria_monocytogenes_1639_v54                          | Listeria_ivanovii_WSLC3009_1457190 | 0.8922 |



[illegible]

|                                                          |                                    |        |
|----------------------------------------------------------|------------------------------------|--------|
| Listeria_monocytogenes_1639_v150                         | Listeria_ivanovii_WSLC3009_1457190 | 0.8876 |
| Listeria_monocytogenes_1639_v14                          | Listeria_ivanovii_WSLC3009_1457190 | 0.8709 |
| Listeria_monocytogenes_1639_v149                         | Listeria_ivanovii_WSLC3009_1457190 | 0.8863 |
| Listeria_monocytogenes_1639_v148                         | Listeria_ivanovii_WSLC3009_1457190 | 0.897  |
| Listeria_monocytogenes_1639_v147                         | Listeria_ivanovii_WSLC3009_1457190 | 0.8849 |
| Listeria_monocytogenes_1639_v146                         | Listeria_ivanovii_WSLC3009_1457190 | 0.9007 |
| Listeria_monocytogenes_1639_v145                         | Listeria_ivanovii_WSLC3009_1457190 | 0.8921 |
| Listeria_monocytogenes_1639_v144                         | Listeria_ivanovii_WSLC3009_1457190 | 0.9032 |
| Listeria_monocytogenes_1639_v143                         | Listeria_ivanovii_WSLC3009_1457190 | 0.8973 |
| Listeria_monocytogenes_1639_v142                         | Listeria_ivanovii_WSLC3009_1457190 | 0.9032 |
| Listeria_monocytogenes_1639_v141                         | Listeria_ivanovii_WSLC3009_1457190 | 0.8988 |
| Listeria_monocytogenes_1639_v140                         | Listeria_ivanovii_WSLC3009_1457190 | 0.9039 |
| Listeria_monocytogenes_1639_v13                          | Listeria_ivanovii_WSLC3009_1457190 | 0.8656 |
| Listeria_monocytogenes_1639_v139                         | Listeria_ivanovii_WSLC3009_1457190 | 0.8968 |
| Listeria_monocytogenes_1639_v138                         | Listeria_ivanovii_WSLC3009_1457190 | 0.9032 |
| Listeria_monocytogenes_1639_v137                         | Listeria_ivanovii_WSLC3009_1457190 | 0.9029 |
| Listeria_monocytogenes_1639_v136                         | Listeria_ivanovii_WSLC3009_1457190 | 0.8847 |
| Listeria_monocytogenes_1639_v135                         | Listeria_ivanovii_WSLC3009_1457190 | 0.8726 |
| Listeria_monocytogenes_1639_v134                         | Listeria_ivanovii_WSLC3009_1457190 | 0.8987 |
| Listeria_monocytogenes_1639_v133                         | Listeria_ivanovii_WSLC3009_1457190 | 0.8912 |
| Listeria_monocytogenes_1639_v132                         | Listeria_ivanovii_WSLC3009_1457190 | 0.8752 |
| Listeria_monocytogenes_1639_v131                         | Listeria_ivanovii_WSLC3009_1457190 | 0.8869 |
| Listeria_monocytogenes_1639_v130                         | Listeria_ivanovii_WSLC3009_1457190 | 0.8787 |
| Listeria_monocytogenes_1639_v12                          | Listeria_ivanovii_WSLC3009_1457190 | 0.8599 |
| Listeria_monocytogenes_1639_v129                         | Listeria_ivanovii_WSLC3009_1457190 | 0.8997 |
| Listeria_monocytogenes_1639_v128                         | Listeria_ivanovii_WSLC3009_1457190 | 0.8954 |
| Listeria_monocytogenes_1639_v127                         | Listeria_ivanovii_WSLC3009_1457190 | 0.8863 |
| Listeria_monocytogenes_1639_v126                         | Listeria_ivanovii_WSLC3009_1457190 | 0.8939 |
| Listeria_monocytogenes_1639_v125                         | Listeria_ivanovii_WSLC3009_1457190 | 0.8878 |
| Listeria_monocytogenes_1639_v124                         | Listeria_ivanovii_WSLC3009_1457190 | 0.8875 |
| Listeria_monocytogenes_1639_v123                         | Listeria_ivanovii_WSLC3009_1457190 | 0.8997 |
| Listeria_monocytogenes_1639_v122                         | Listeria_ivanovii_WSLC3009_1457190 | 0.8997 |
| Listeria_monocytogenes_1639_v121                         | Listeria_ivanovii_WSLC3009_1457190 | 0.8997 |
| Listeria_monocytogenes_1639_v120                         | Listeria_ivanovii_WSLC3009_1457190 | 0.8997 |
| Listeria_monocytogenes_1639_v11                          | Listeria_ivanovii_WSLC3009_1457190 | 0.8586 |
| Listeria_monocytogenes_1639_v119                         | Listeria_ivanovii_WSLC3009_1457190 | 0.8997 |
| Listeria_monocytogenes_1639_v118                         | Listeria_ivanovii_WSLC3009_1457190 | 0.8997 |
| Listeria_monocytogenes_1639_v117                         | Listeria_ivanovii_WSLC3009_1457190 | 0.8855 |
| Listeria_monocytogenes_1639_v116                         | Listeria_ivanovii_WSLC3009_1457190 | 0.8986 |
| Listeria_monocytogenes_1639_v115                         | Listeria_ivanovii_WSLC3009_1457190 | 0.899  |
| Listeria_monocytogenes_1639_v114                         | Listeria_ivanovii_WSLC3009_1457190 | 0.8792 |
| Listeria_monocytogenes_1639_v113                         | Listeria_ivanovii_WSLC3009_1457190 | 0.8939 |
| Listeria_monocytogenes_1639_v112                         | Listeria_ivanovii_WSLC3009_1457190 | 0.8944 |
| Listeria_monocytogenes_1639_v111                         | Listeria_ivanovii_WSLC3009_1457190 | 0.8907 |
| Listeria_monocytogenes_1639_v110                         | Listeria_ivanovii_WSLC3009_1457190 | 0.8789 |
| Listeria_monocytogenes_1639_v10                          | Listeria_ivanovii_WSLC3009_1457190 | 0.8638 |
| Listeria_monocytogenes_1639_v109                         | Listeria_ivanovii_WSLC3009_1457190 | 0.8788 |
| Listeria_monocytogenes_1639_v108                         | Listeria_ivanovii_WSLC3009_1457190 | 0.8883 |
| Listeria_monocytogenes_1639_v107                         | Listeria_ivanovii_WSLC3009_1457190 | 0.8961 |
| Listeria_monocytogenes_1639_v106                         | Listeria_ivanovii_WSLC3009_1457190 | 0.8965 |
| Listeria_monocytogenes_1639_v105                         | Listeria_ivanovii_WSLC3009_1457190 | 0.8965 |
| Listeria_monocytogenes_1639_v104                         | Listeria_ivanovii_WSLC3009_1457190 | 0.8965 |
| Listeria_monocytogenes_1639_v103                         | Listeria_ivanovii_WSLC3009_1457190 | 0.8968 |
| Listeria_monocytogenes_1639_v102                         | Listeria_ivanovii_WSLC3009_1457190 | 0.8811 |
| Listeria_monocytogenes_1639_v101                         | Listeria_ivanovii_WSLC3009_1457190 | 0.8702 |
| Listeria_monocytogenes_1639_v100                         | Listeria_ivanovii_WSLC3009_1457190 | 0.8699 |
| Listeria_monocytogenes_1639                              | Listeria_ivanovii_WSLC3009_1457190 | 0.8965 |
| Listeria_monocytogenes_10403S_393133                     | Listeria_ivanovii_WSLC3009_1457190 | 0.8889 |
| Listeria_monocytogenes_08-5923_637381                    | Listeria_ivanovii_WSLC3009_1457190 | 0.8708 |
| Listeria_monocytogenes_08-5578_653938                    | Listeria_ivanovii_WSLC3009_1457190 | 0.858  |
| Listeria_monocytogenes_07PF0776_1126011                  | Listeria_ivanovii_WSLC3009_1457190 | 0.9029 |
| Listeria_marthii_FSL_S4-120_702457                       | Listeria_ivanovii_WSLC3009_1457190 | 0.8272 |
| Listeria_marthii_529731_v1                               | Listeria_ivanovii_WSLC3009_1457190 | 0.8631 |
| Listeria_marthii_529731                                  | Listeria_ivanovii_WSLC3009_1457190 | 0.8727 |
| Listeria_ivanovii_WSLC3009_1457190                       | Listeria_ivanovii_WSLC3009_1457190 | 0.0631 |
| Listeria_welshimeri_1643                                 | Listeria_marthii_529731            | 0.8676 |
| Listeria_welshimeri_serovar_6b_str_SLCC5334_386043       | Listeria_marthii_529731            | 0.867  |
| Listeria_seeligeri_serovar_1_2b_str_SLCC3954_683837      | Listeria_marthii_529731            | 0.8697 |
| Listeria_seeligeri_FSL_S4-171_702452                     | Listeria_marthii_529731            | 0.811  |
| Listeria_seeligeri_FSL_N1-067_702453                     | Listeria_marthii_529731            | 0.8048 |
| Listeria_seeligeri_1640_v1                               | Listeria_marthii_529731            | 0.871  |
| Listeria_seeligeri_1640                                  | Listeria_marthii_529731            | 0.8567 |
| Listeria_monocytogenes_WSLC1042_1457188                  | Listeria_marthii_529731            | 0.9084 |
| Listeria_monocytogenes_WSLC1001_1457187                  | Listeria_marthii_529731            | 0.8927 |
| Listeria_monocytogenes_SLCC7179_879090                   | Listeria_marthii_529731            | 0.8994 |
| Listeria_monocytogenes_SLCC5850_882096                   | Listeria_marthii_529731            | 0.8968 |
| Listeria_monocytogenes_SLCC2755_932919                   | Listeria_marthii_529731            | 0.8908 |
| Listeria_monocytogenes_SLCC2540_879089                   | Listeria_marthii_529731            | 0.8957 |
| Listeria_monocytogenes_SLCC2479_882020                   | Listeria_marthii_529731            | 0.8923 |
| Listeria_monocytogenes_SLCC2378_879088                   | Listeria_marthii_529731            | 0.9098 |
| Listeria_monocytogenes_SLCC2376_882097                   | Listeria_marthii_529731            | 0.921  |
| Listeria_monocytogenes_SLCC2372_932920                   | Listeria_marthii_529731            | 0.8856 |
| Listeria_monocytogenes_serotype_4b_str_LL195_1230340     | Listeria_marthii_529731            | 0.9142 |
| Listeria_monocytogenes_serotype_4b_str_LIS0087_1134669   | Listeria_marthii_529731            | 0.8734 |
| Listeria_monocytogenes_serotype_4b_str_F2365_265669      | Listeria_marthii_529731            | 0.9142 |
| Listeria_monocytogenes_serotype_4b_str_CLIP_80459_568819 | Listeria_marthii_529731            | 0.9137 |
| Listeria_monocytogenes_serotype_4b_str_81-0861_1196161   | Listeria_marthii_529731            | 0.8998 |
| Listeria_monocytogenes_serotype_4b_str_81-0592_1196160   | Listeria_marthii_529731            | 0.9008 |
| Listeria_monocytogenes_serotype_4b_str_81-0558_1196159   | Listeria_marthii_529731            | 0.9008 |
| Listeria_monocytogenes_serotype_4b_str_10-0809_1196162   | Listeria_marthii_529731            | 0.9008 |
| Listeria_monocytogenes_serotype_4b_str_02-6680_1196175   | Listeria_marthii_529731            | 0.9108 |

|                                                          |                         |        |
|----------------------------------------------------------|-------------------------|--------|
| Listeria_monocytogenes_serotype_4b_str_02-6679_1196174   | Listeria_marthii_529731 | 0.9108 |
| Listeria_monocytogenes_serotype_4b_str_02-1792_1196173   | Listeria_marthii_529731 | 0.9008 |
| Listeria_monocytogenes_serotype_4b_str_02-1289_1196172   | Listeria_marthii_529731 | 0.9008 |
| Listeria_monocytogenes_serotype_4b_str_02-1103_1196171   | Listeria_marthii_529731 | 0.9008 |
| Listeria_monocytogenes_serotype_3c_str_10-5027_1196195   | Listeria_marthii_529731 | 0.8911 |
| Listeria_monocytogenes_serotype_1_2c_str_10-5026_1196194 | Listeria_marthii_529731 | 0.8923 |
| Listeria_monocytogenes_serotype_1_2c_str_10-5025_1196193 | Listeria_marthii_529731 | 0.8923 |
| Listeria_monocytogenes_serotype_1_2b_str_10-0811_1196164 | Listeria_marthii_529731 | 0.8875 |
| Listeria_monocytogenes_serotype_1_2b_str_10-0810_1196163 | Listeria_marthii_529731 | 0.8875 |
| Listeria_monocytogenes_serotype_1_2a_str_99-6370_1196179 | Listeria_marthii_529731 | 0.8757 |
| Listeria_monocytogenes_serotype_1_2a_str_98-2035_1196178 | Listeria_marthii_529731 | 0.8757 |
| Listeria_monocytogenes_serotype_1_2a_str_95-0093_1196177 | Listeria_marthii_529731 | 0.881  |
| Listeria_monocytogenes_serotype_1_2a_str_88-0478_1196176 | Listeria_marthii_529731 | 0.8801 |
| Listeria_monocytogenes_serotype_1_2a_str_10-5024_1196192 | Listeria_marthii_529731 | 0.8813 |
| Listeria_monocytogenes_serotype_1_2a_str_10-4758_1196168 | Listeria_marthii_529731 | 0.8981 |
| Listeria_monocytogenes_serotype_1_2a_str_10-4754_1196167 | Listeria_marthii_529731 | 0.8981 |
| Listeria_monocytogenes_serotype_1_2a_str_10-1321_1196191 | Listeria_marthii_529731 | 0.8813 |
| Listeria_monocytogenes_serotype_1_2a_str_10-1047_1196190 | Listeria_marthii_529731 | 0.8816 |
| Listeria_monocytogenes_serotype_1_2a_str_10-1046_1196189 | Listeria_marthii_529731 | 0.8816 |
| Listeria_monocytogenes_serotype_1_2a_str_10-0934_1196170 | Listeria_marthii_529731 | 0.9095 |
| Listeria_monocytogenes_serotype_1_2a_str_10-0933_1196169 | Listeria_marthii_529731 | 0.9095 |
| Listeria_monocytogenes_serotype_1_2a_str_10-0815_1196188 | Listeria_marthii_529731 | 0.8771 |
| Listeria_monocytogenes_serotype_1_2a_str_10-0814_1196187 | Listeria_marthii_529731 | 0.881  |
| Listeria_monocytogenes_serotype_1_2a_str_10-0813_1196166 | Listeria_marthii_529731 | 0.8907 |
| Listeria_monocytogenes_serotype_1_2a_str_10-0812_1196165 | Listeria_marthii_529731 | 0.8907 |
| Listeria_monocytogenes_serotype_1_2a_str_08-7669_1196186 | Listeria_marthii_529731 | 0.8904 |
| Listeria_monocytogenes_serotype_1_2a_str_08-7374_1196185 | Listeria_marthii_529731 | 0.8813 |
| Listeria_monocytogenes_serotype_1_2a_str_08-6997_1196184 | Listeria_marthii_529731 | 0.8771 |
| Listeria_monocytogenes_serotype_1_2a_str_08-6569_1196183 | Listeria_marthii_529731 | 0.8771 |
| Listeria_monocytogenes_serotype_1_2a_str_08-6056_1196182 | Listeria_marthii_529731 | 0.8771 |
| Listeria_monocytogenes_serotype_1_2a_str_04-5457_1196181 | Listeria_marthii_529731 | 0.8813 |
| Listeria_monocytogenes_serotype_1_2a_str_02-5993_1196180 | Listeria_marthii_529731 | 0.881  |
| Listeria_monocytogenes_R479a_1437838                     | Listeria_marthii_529731 | 0.8814 |
| Listeria_monocytogenes_N53-1_1234142                     | Listeria_marthii_529731 | 0.8595 |
| Listeria_monocytogenes_M7_1030009                        | Listeria_marthii_529731 | 0.8924 |
| Listeria_monocytogenes_LO28_393132                       | Listeria_marthii_529731 | 0.891  |
| Listeria_monocytogenes_L99_563174                        | Listeria_marthii_529731 | 0.8931 |
| Listeria_monocytogenes_L312_882094                       | Listeria_marthii_529731 | 0.9137 |
| Listeria_monocytogenes_J1816_930781                      | Listeria_marthii_529731 | 0.8921 |
| Listeria_monocytogenes_J1-220_930782                     | Listeria_marthii_529731 | 0.8896 |
| Listeria_monocytogenes_J0161_393130                      | Listeria_marthii_529731 | 0.8909 |
| Listeria_monocytogenes_HCC23_552536                      | Listeria_marthii_529731 | 0.8928 |
| Listeria_monocytogenes_FSL_R2-561_393126                 | Listeria_marthii_529731 | 0.8909 |
| Listeria_monocytogenes_FSL_J1-208_393119                 | Listeria_marthii_529731 | 0.9205 |
| Listeria_monocytogenes_FSL_J1-175_393118                 | Listeria_marthii_529731 | 0.901  |
| Listeria_monocytogenes_Finland_1998_393127               | Listeria_marthii_529731 | 0.908  |
| Listeria_monocytogenes_EGD-e_169963_v1                   | Listeria_marthii_529731 | 0.9005 |
| Listeria_monocytogenes_EGD-e_169963                      | Listeria_marthii_529731 | 0.9005 |
| Listeria_monocytogenes_EGD_1334565                       | Listeria_marthii_529731 | 0.8975 |
| Listeria_monocytogenes_CFSAN002349_1299895               | Listeria_marthii_529731 | 0.9086 |
| Listeria_monocytogenes_ATCC_19117_882095_v1              | Listeria_marthii_529731 | 0.9076 |
| Listeria_monocytogenes_ATCC_19117_882095                 | Listeria_marthii_529731 | 0.9076 |
| Listeria_monocytogenes_6179_1288295                      | Listeria_marthii_529731 | 0.8786 |
| Listeria_monocytogenes_1639_v9                           | Listeria_marthii_529731 | 0.8738 |
| Listeria_monocytogenes_1639_v99                          | Listeria_marthii_529731 | 0.8937 |
| Listeria_monocytogenes_1639_v98                          | Listeria_marthii_529731 | 0.8881 |
| Listeria_monocytogenes_1639_v97                          | Listeria_marthii_529731 | 0.9001 |
| Listeria_monocytogenes_1639_v96                          | Listeria_marthii_529731 | 0.8934 |
| Listeria_monocytogenes_1639_v95                          | Listeria_marthii_529731 | 0.8934 |
| Listeria_monocytogenes_1639_v94                          | Listeria_marthii_529731 | 0.8934 |
| Listeria_monocytogenes_1639_v93                          | Listeria_marthii_529731 | 0.8862 |
| Listeria_monocytogenes_1639_v92                          | Listeria_marthii_529731 | 0.8933 |
| Listeria_monocytogenes_1639_v91                          | Listeria_marthii_529731 | 0.8966 |
| Listeria_monocytogenes_1639_v90                          | Listeria_marthii_529731 | 0.8881 |
| Listeria_monocytogenes_1639_v8                           | Listeria_marthii_529731 | 0.8709 |
| Listeria_monocytogenes_1639_v89                          | Listeria_marthii_529731 | 0.902  |
| Listeria_monocytogenes_1639_v88                          | Listeria_marthii_529731 | 0.8924 |
| Listeria_monocytogenes_1639_v87                          | Listeria_marthii_529731 | 0.886  |
| Listeria_monocytogenes_1639_v86                          | Listeria_marthii_529731 | 0.8853 |
| Listeria_monocytogenes_1639_v85                          | Listeria_marthii_529731 | 0.8999 |
| Listeria_monocytogenes_1639_v84                          | Listeria_marthii_529731 | 0.8879 |
| Listeria_monocytogenes_1639_v83                          | Listeria_marthii_529731 | 0.898  |
| Listeria_monocytogenes_1639_v82                          | Listeria_marthii_529731 | 0.8977 |
| Listeria_monocytogenes_1639_v81                          | Listeria_marthii_529731 | 0.8905 |
| Listeria_monocytogenes_1639_v80                          | Listeria_marthii_529731 | 0.8929 |
| Listeria_monocytogenes_1639_v7                           | Listeria_marthii_529731 | 0.8709 |
| Listeria_monocytogenes_1639_v79                          | Listeria_marthii_529731 | 0.8896 |
| Listeria_monocytogenes_1639_v78                          | Listeria_marthii_529731 | 0.8902 |
| Listeria_monocytogenes_1639_v77                          | Listeria_marthii_529731 | 0.8909 |
| Listeria_monocytogenes_1639_v76                          | Listeria_marthii_529731 | 0.8838 |
| Listeria_monocytogenes_1639_v75                          | Listeria_marthii_529731 | 0.8931 |
| Listeria_monocytogenes_1639_v74                          | Listeria_marthii_529731 | 0.8887 |
| Listeria_monocytogenes_1639_v73                          | Listeria_marthii_529731 | 0.8863 |
| Listeria_monocytogenes_1639_v72                          | Listeria_marthii_529731 | 0.8975 |
| Listeria_monocytogenes_1639_v71                          | Listeria_marthii_529731 | 0.8764 |
| Listeria_monocytogenes_1639_v70                          | Listeria_marthii_529731 | 0.8893 |
| Listeria_monocytogenes_1639_v6                           | Listeria_marthii_529731 | 0.8702 |
| Listeria_monocytogenes_1639_v69                          | Listeria_marthii_529731 | 0.9012 |
| Listeria_monocytogenes_1639_v68                          | Listeria_marthii_529731 | 0.8935 |
| Listeria_monocytogenes_1639_v67                          | Listeria_marthii_529731 | 0.8931 |
| Listeria_monocytogenes_1639_v66                          | Listeria_marthii_529731 | 0.8955 |



|                                                     |                            |        |
|-----------------------------------------------------|----------------------------|--------|
| Listeria_monocytogenes_1639_v162                    | Listeria_marthii_529731    | 0.9152 |
| Listeria_monocytogenes_1639_v161                    | Listeria_marthii_529731    | 0.9141 |
| Listeria_monocytogenes_1639_v160                    | Listeria_marthii_529731    | 0.9145 |
| Listeria_monocytogenes_1639_v15                     | Listeria_marthii_529731    | 0.8745 |
| Listeria_monocytogenes_1639_v159                    | Listeria_marthii_529731    | 0.9097 |
| Listeria_monocytogenes_1639_v158                    | Listeria_marthii_529731    | 0.9142 |
| Listeria_monocytogenes_1639_v157                    | Listeria_marthii_529731    | 0.9142 |
| Listeria_monocytogenes_1639_v156                    | Listeria_marthii_529731    | 0.8899 |
| Listeria_monocytogenes_1639_v155                    | Listeria_marthii_529731    | 0.8996 |
| Listeria_monocytogenes_1639_v154                    | Listeria_marthii_529731    | 0.8973 |
| Listeria_monocytogenes_1639_v153                    | Listeria_marthii_529731    | 0.9011 |
| Listeria_monocytogenes_1639_v152                    | Listeria_marthii_529731    | 0.9101 |
| Listeria_monocytogenes_1639_v151                    | Listeria_marthii_529731    | 0.9101 |
| Listeria_monocytogenes_1639_v150                    | Listeria_marthii_529731    | 0.8988 |
| Listeria_monocytogenes_1639_v14                     | Listeria_marthii_529731    | 0.881  |
| Listeria_monocytogenes_1639_v149                    | Listeria_marthii_529731    | 0.8975 |
| Listeria_monocytogenes_1639_v148                    | Listeria_marthii_529731    | 0.9086 |
| Listeria_monocytogenes_1639_v147                    | Listeria_marthii_529731    | 0.8994 |
| Listeria_monocytogenes_1639_v146                    | Listeria_marthii_529731    | 0.9089 |
| Listeria_monocytogenes_1639_v145                    | Listeria_marthii_529731    | 0.9041 |
| Listeria_monocytogenes_1639_v144                    | Listeria_marthii_529731    | 0.9137 |
| Listeria_monocytogenes_1639_v143                    | Listeria_marthii_529731    | 0.909  |
| Listeria_monocytogenes_1639_v142                    | Listeria_marthii_529731    | 0.9137 |
| Listeria_monocytogenes_1639_v141                    | Listeria_marthii_529731    | 0.9035 |
| Listeria_monocytogenes_1639_v140                    | Listeria_marthii_529731    | 0.9137 |
| Listeria_monocytogenes_1639_v13                     | Listeria_marthii_529731    | 0.8748 |
| Listeria_monocytogenes_1639_v139                    | Listeria_marthii_529731    | 0.9077 |
| Listeria_monocytogenes_1639_v138                    | Listeria_marthii_529731    | 0.9138 |
| Listeria_monocytogenes_1639_v137                    | Listeria_marthii_529731    | 0.913  |
| Listeria_monocytogenes_1639_v136                    | Listeria_marthii_529731    | 0.8978 |
| Listeria_monocytogenes_1639_v135                    | Listeria_marthii_529731    | 0.9047 |
| Listeria_monocytogenes_1639_v134                    | Listeria_marthii_529731    | 0.9091 |
| Listeria_monocytogenes_1639_v133                    | Listeria_marthii_529731    | 0.9024 |
| Listeria_monocytogenes_1639_v132                    | Listeria_marthii_529731    | 0.9097 |
| Listeria_monocytogenes_1639_v131                    | Listeria_marthii_529731    | 0.8987 |
| Listeria_monocytogenes_1639_v130                    | Listeria_marthii_529731    | 0.8919 |
| Listeria_monocytogenes_1639_v12                     | Listeria_marthii_529731    | 0.8732 |
| Listeria_monocytogenes_1639_v129                    | Listeria_marthii_529731    | 0.9095 |
| Listeria_monocytogenes_1639_v128                    | Listeria_marthii_529731    | 0.9009 |
| Listeria_monocytogenes_1639_v127                    | Listeria_marthii_529731    | 0.9009 |
| Listeria_monocytogenes_1639_v126                    | Listeria_marthii_529731    | 0.9001 |
| Listeria_monocytogenes_1639_v125                    | Listeria_marthii_529731    | 0.8978 |
| Listeria_monocytogenes_1639_v124                    | Listeria_marthii_529731    | 0.9151 |
| Listeria_monocytogenes_1639_v123                    | Listeria_marthii_529731    | 0.9086 |
| Listeria_monocytogenes_1639_v122                    | Listeria_marthii_529731    | 0.909  |
| Listeria_monocytogenes_1639_v121                    | Listeria_marthii_529731    | 0.909  |
| Listeria_monocytogenes_1639_v120                    | Listeria_marthii_529731    | 0.909  |
| Listeria_monocytogenes_1639_v11                     | Listeria_marthii_529731    | 0.8759 |
| Listeria_monocytogenes_1639_v119                    | Listeria_marthii_529731    | 0.909  |
| Listeria_monocytogenes_1639_v118                    | Listeria_marthii_529731    | 0.909  |
| Listeria_monocytogenes_1639_v117                    | Listeria_marthii_529731    | 0.8966 |
| Listeria_monocytogenes_1639_v116                    | Listeria_marthii_529731    | 0.9091 |
| Listeria_monocytogenes_1639_v115                    | Listeria_marthii_529731    | 0.9094 |
| Listeria_monocytogenes_1639_v114                    | Listeria_marthii_529731    | 0.891  |
| Listeria_monocytogenes_1639_v113                    | Listeria_marthii_529731    | 0.9024 |
| Listeria_monocytogenes_1639_v112                    | Listeria_marthii_529731    | 0.9041 |
| Listeria_monocytogenes_1639_v111                    | Listeria_marthii_529731    | 0.8938 |
| Listeria_monocytogenes_1639_v110                    | Listeria_marthii_529731    | 0.8903 |
| Listeria_monocytogenes_1639_v10                     | Listeria_marthii_529731    | 0.8723 |
| Listeria_monocytogenes_1639_v109                    | Listeria_marthii_529731    | 0.8907 |
| Listeria_monocytogenes_1639_v108                    | Listeria_marthii_529731    | 0.8997 |
| Listeria_monocytogenes_1639_v107                    | Listeria_marthii_529731    | 0.9065 |
| Listeria_monocytogenes_1639_v106                    | Listeria_marthii_529731    | 0.9065 |
| Listeria_monocytogenes_1639_v105                    | Listeria_marthii_529731    | 0.9069 |
| Listeria_monocytogenes_1639_v104                    | Listeria_marthii_529731    | 0.9069 |
| Listeria_monocytogenes_1639_v103                    | Listeria_marthii_529731    | 0.9069 |
| Listeria_monocytogenes_1639_v102                    | Listeria_marthii_529731    | 0.891  |
| Listeria_monocytogenes_1639_v101                    | Listeria_marthii_529731    | 0.8814 |
| Listeria_monocytogenes_1639_v100                    | Listeria_marthii_529731    | 0.8801 |
| Listeria_monocytogenes_1639                         | Listeria_marthii_529731    | 0.9082 |
| Listeria_monocytogenes_10403S_393133                | Listeria_marthii_529731    | 0.9009 |
| Listeria_monocytogenes_08-5923_637381               | Listeria_marthii_529731    | 0.8813 |
| Listeria_monocytogenes_08-5578_653938               | Listeria_marthii_529731    | 0.8691 |
| Listeria_monocytogenes_07PF0776_1126011             | Listeria_marthii_529731    | 0.9119 |
| Listeria_marthii_FSL_S4-120_702457                  | Listeria_marthii_529731    | 0.8813 |
| Listeria_marthii_529731_v1                          | Listeria_marthii_529731    | 0.9332 |
| Listeria_marthii_529731                             | Listeria_marthii_529731    | 0.0561 |
| Listeria_welshimeri_1643                            | Listeria_marthii_529731_v1 | 0.8635 |
| Listeria_welshimeri_serovar_6b_str_SLCC5334_386043  | Listeria_marthii_529731_v1 | 0.8628 |
| Listeria_seeligeri_serovar_1_2b_str_SLCC3954_683837 | Listeria_marthii_529731_v1 | 0.8658 |
| Listeria_seeligeri_FSL_S4-171_702452                | Listeria_marthii_529731_v1 | 0.8162 |
| Listeria_seeligeri_FSL_N1-067_702453                | Listeria_marthii_529731_v1 | 0.8095 |
| Listeria_seeligeri_1640_v1                          | Listeria_marthii_529731_v1 | 0.8709 |
| Listeria_seeligeri_1640                             | Listeria_marthii_529731_v1 | 0.8708 |
| Listeria_monocytogenes_WSLC1042_1457188             | Listeria_marthii_529731_v1 | 0.907  |
| Listeria_monocytogenes_WSLC1001_1457187             | Listeria_marthii_529731_v1 | 0.8946 |
| Listeria_monocytogenes_SLCC7179_879090              | Listeria_marthii_529731_v1 | 0.9096 |
| Listeria_monocytogenes_SLCC5850_882096              | Listeria_marthii_529731_v1 | 0.8979 |
| Listeria_monocytogenes_SLCC2755_932919              | Listeria_marthii_529731_v1 | 0.8897 |
| Listeria_monocytogenes_SLCC2540_879089              | Listeria_marthii_529731_v1 | 0.893  |
| Listeria_monocytogenes_SLCC2479_882020              | Listeria_marthii_529731_v1 | 0.8927 |



|                                                          |                            |        |
|----------------------------------------------------------|----------------------------|--------|
| Listeria_monocytogenes_SLCC2378_879088                   | Listeria_marthii_529731_v1 | 0.9084 |
| Listeria_monocytogenes_SLCC2376_882097                   | Listeria_marthii_529731_v1 | 0.916  |
| Listeria_monocytogenes_SLCC2372_932920                   | Listeria_marthii_529731_v1 | 0.8854 |
| Listeria_monocytogenes_serotype_4b_str_LL195_1230340     | Listeria_marthii_529731_v1 | 0.9131 |
| Listeria_monocytogenes_serotype_4b_str_LIS0087_1134669   | Listeria_marthii_529731_v1 | 0.8825 |
| Listeria_monocytogenes_serotype_4b_str_F2365_265669      | Listeria_marthii_529731_v1 | 0.9131 |
| Listeria_monocytogenes_serotype_4b_str_CLIP_80459_568819 | Listeria_marthii_529731_v1 | 0.9138 |
| Listeria_monocytogenes_serotype_4b_str_81-0861_1196161   | Listeria_marthii_529731_v1 | 0.9091 |
| Listeria_monocytogenes_serotype_4b_str_81-0592_1196160   | Listeria_marthii_529731_v1 | 0.9101 |
| Listeria_monocytogenes_serotype_4b_str_81-0558_1196159   | Listeria_marthii_529731_v1 | 0.9108 |
| Listeria_monocytogenes_serotype_4b_str_10-0809_1196162   | Listeria_marthii_529731_v1 | 0.9101 |
| Listeria_monocytogenes_serotype_4b_str_02-6680_1196175   | Listeria_marthii_529731_v1 | 0.911  |
| Listeria_monocytogenes_serotype_4b_str_02-6679_1196174   | Listeria_marthii_529731_v1 | 0.911  |
| Listeria_monocytogenes_serotype_4b_str_02-1792_1196173   | Listeria_marthii_529731_v1 | 0.9116 |
| Listeria_monocytogenes_serotype_4b_str_02-1289_1196172   | Listeria_marthii_529731_v1 | 0.9116 |
| Listeria_monocytogenes_serotype_4b_str_02-1103_1196171   | Listeria_marthii_529731_v1 | 0.9116 |
| Listeria_monocytogenes_serotype_3c_str_10-5027_1196195   | Listeria_marthii_529731_v1 | 0.8908 |
| Listeria_monocytogenes_serotype_1_2c_str_10-5026_1196194 | Listeria_marthii_529731_v1 | 0.8915 |
| Listeria_monocytogenes_serotype_1_2c_str_10-5025_1196193 | Listeria_marthii_529731_v1 | 0.8915 |
| Listeria_monocytogenes_serotype_1_2b_str_10-0811_1196164 | Listeria_marthii_529731_v1 | 0.8958 |
| Listeria_monocytogenes_serotype_1_2b_str_10-0810_1196163 | Listeria_marthii_529731_v1 | 0.8958 |
| Listeria_monocytogenes_serotype_1_2a_str_99-6370_1196179 | Listeria_marthii_529731_v1 | 0.8786 |
| Listeria_monocytogenes_serotype_1_2a_str_98-2035_1196178 | Listeria_marthii_529731_v1 | 0.8786 |
| Listeria_monocytogenes_serotype_1_2a_str_95-0093_1196177 | Listeria_marthii_529731_v1 | 0.8838 |
| Listeria_monocytogenes_serotype_1_2a_str_88-0478_1196176 | Listeria_marthii_529731_v1 | 0.8837 |
| Listeria_monocytogenes_serotype_1_2a_str_10-5024_1196192 | Listeria_marthii_529731_v1 | 0.8841 |
| Listeria_monocytogenes_serotype_1_2a_str_10-4758_1196168 | Listeria_marthii_529731_v1 | 0.8958 |
| Listeria_monocytogenes_serotype_1_2a_str_10-4754_1196167 | Listeria_marthii_529731_v1 | 0.8958 |
| Listeria_monocytogenes_serotype_1_2a_str_10-1321_1196191 | Listeria_marthii_529731_v1 | 0.8841 |
| Listeria_monocytogenes_serotype_1_2a_str_10-1047_1196190 | Listeria_marthii_529731_v1 | 0.8844 |
| Listeria_monocytogenes_serotype_1_2a_str_10-1046_1196189 | Listeria_marthii_529731_v1 | 0.8844 |
| Listeria_monocytogenes_serotype_1_2a_str_10-0934_1196170 | Listeria_marthii_529731_v1 | 0.9074 |
| Listeria_monocytogenes_serotype_1_2a_str_10-0933_1196169 | Listeria_marthii_529731_v1 | 0.9074 |
| Listeria_monocytogenes_serotype_1_2a_str_10-0815_1196188 | Listeria_marthii_529731_v1 | 0.8799 |
| Listeria_monocytogenes_serotype_1_2a_str_10-0814_1196187 | Listeria_marthii_529731_v1 | 0.8841 |
| Listeria_monocytogenes_serotype_1_2a_str_10-0813_1196166 | Listeria_marthii_529731_v1 | 0.8994 |
| Listeria_monocytogenes_serotype_1_2a_str_10-0812_1196165 | Listeria_marthii_529731_v1 | 0.8994 |
| Listeria_monocytogenes_serotype_1_2a_str_08-7669_1196186 | Listeria_marthii_529731_v1 | 0.8927 |
| Listeria_monocytogenes_serotype_1_2a_str_08-7374_1196185 | Listeria_marthii_529731_v1 | 0.8841 |
| Listeria_monocytogenes_serotype_1_2a_str_08-6997_1196184 | Listeria_marthii_529731_v1 | 0.8799 |
| Listeria_monocytogenes_serotype_1_2a_str_08-6569_1196183 | Listeria_marthii_529731_v1 | 0.8799 |
| Listeria_monocytogenes_serotype_1_2a_str_08-6056_1196182 | Listeria_marthii_529731_v1 | 0.8799 |
| Listeria_monocytogenes_serotype_1_2a_str_04-5457_1196181 | Listeria_marthii_529731_v1 | 0.8841 |
| Listeria_monocytogenes_serotype_1_2a_str_02-5993_1196180 | Listeria_marthii_529731_v1 | 0.8838 |
| Listeria_monocytogenes_R479a_1437838                     | Listeria_marthii_529731_v1 | 0.8813 |
| Listeria_monocytogenes_N53-1_1234142                     | Listeria_marthii_529731_v1 | 0.86   |
| Listeria_monocytogenes_M7_1030009                        | Listeria_marthii_529731_v1 | 0.8999 |
| Listeria_monocytogenes_LO28_393132                       | Listeria_marthii_529731_v1 | 0.8966 |
| Listeria_monocytogenes_L99_563174                        | Listeria_marthii_529731_v1 | 0.9006 |
| Listeria_monocytogenes_L312_882094                       | Listeria_marthii_529731_v1 | 0.9138 |
| Listeria_monocytogenes_J1816_930781                      | Listeria_marthii_529731_v1 | 0.8955 |
| Listeria_monocytogenes_J1-220_930782                     | Listeria_marthii_529731_v1 | 0.9019 |
| Listeria_monocytogenes_J0161_393130                      | Listeria_marthii_529731_v1 | 0.8996 |
| Listeria_monocytogenes_HCC23_552536                      | Listeria_marthii_529731_v1 | 0.9002 |
| Listeria_monocytogenes_FSL_R2-561_393126                 | Listeria_marthii_529731_v1 | 0.8906 |
| Listeria_monocytogenes_FSL_J1-208_393119                 | Listeria_marthii_529731_v1 | 0.91   |
| Listeria_monocytogenes_FSL_J1-175_393118                 | Listeria_marthii_529731_v1 | 0.896  |
| Listeria_monocytogenes_Finland_1998_393127               | Listeria_marthii_529731_v1 | 0.9032 |
| Listeria_monocytogenes_EGD-e_169963_v1                   | Listeria_marthii_529731_v1 | 0.9069 |
| Listeria_monocytogenes_EGD-e_169963                      | Listeria_marthii_529731_v1 | 0.9072 |
| Listeria_monocytogenes_EGD_1334565                       | Listeria_marthii_529731_v1 | 0.8986 |
| Listeria_monocytogenes_CFSAN002349_1299895               | Listeria_marthii_529731_v1 | 0.9084 |
| Listeria_monocytogenes_ATCC_19117_882095_v1              | Listeria_marthii_529731_v1 | 0.9066 |
| Listeria_monocytogenes_ATCC_19117_882095                 | Listeria_marthii_529731_v1 | 0.9066 |
| Listeria_monocytogenes_6179_1288295                      | Listeria_marthii_529731_v1 | 0.8837 |
| Listeria_monocytogenes_1639_v9                           | Listeria_marthii_529731_v1 | 0.8811 |
| Listeria_monocytogenes_1639_v99                          | Listeria_marthii_529731_v1 | 0.8967 |
| Listeria_monocytogenes_1639_v98                          | Listeria_marthii_529731_v1 | 0.9021 |
| Listeria_monocytogenes_1639_v97                          | Listeria_marthii_529731_v1 | 0.9038 |
| Listeria_monocytogenes_1639_v96                          | Listeria_marthii_529731_v1 | 0.896  |
| Listeria_monocytogenes_1639_v95                          | Listeria_marthii_529731_v1 | 0.8961 |
| Listeria_monocytogenes_1639_v94                          | Listeria_marthii_529731_v1 | 0.8964 |
| Listeria_monocytogenes_1639_v93                          | Listeria_marthii_529731_v1 | 0.8811 |
| Listeria_monocytogenes_1639_v92                          | Listeria_marthii_529731_v1 | 0.8967 |
| Listeria_monocytogenes_1639_v91                          | Listeria_marthii_529731_v1 | 0.9107 |
| Listeria_monocytogenes_1639_v90                          | Listeria_marthii_529731_v1 | 0.9021 |
| Listeria_monocytogenes_1639_v8                           | Listeria_marthii_529731_v1 | 0.8705 |
| Listeria_monocytogenes_1639_v89                          | Listeria_marthii_529731_v1 | 0.9117 |
| Listeria_monocytogenes_1639_v88                          | Listeria_marthii_529731_v1 | 0.8951 |
| Listeria_monocytogenes_1639_v87                          | Listeria_marthii_529731_v1 | 0.8969 |
| Listeria_monocytogenes_1639_v86                          | Listeria_marthii_529731_v1 | 0.8962 |
| Listeria_monocytogenes_1639_v85                          | Listeria_marthii_529731_v1 | 0.9107 |
| Listeria_monocytogenes_1639_v84                          | Listeria_marthii_529731_v1 | 0.8929 |
| Listeria_monocytogenes_1639_v83                          | Listeria_marthii_529731_v1 | 0.9074 |
| Listeria_monocytogenes_1639_v82                          | Listeria_marthii_529731_v1 | 0.907  |
| Listeria_monocytogenes_1639_v81                          | Listeria_marthii_529731_v1 | 0.8913 |
| Listeria_monocytogenes_1639_v80                          | Listeria_marthii_529731_v1 | 0.8997 |
| Listeria_monocytogenes_1639_v7                           | Listeria_marthii_529731_v1 | 0.8705 |
| Listeria_monocytogenes_1639_v79                          | Listeria_marthii_529731_v1 | 0.8893 |
| Listeria_monocytogenes_1639_v78                          | Listeria_marthii_529731_v1 | 0.891  |
| Listeria_monocytogenes_1639_v77                          | Listeria_marthii_529731_v1 | 0.8928 |



[illegible]

|                                                     |                                    |        |
|-----------------------------------------------------|------------------------------------|--------|
| Listeria_monocytogenes_1639_v173                    | Listeria_marthii_529731_v1         | 0.9074 |
| Listeria_monocytogenes_1639_v172                    | Listeria_marthii_529731_v1         | 0.9185 |
| Listeria_monocytogenes_1639_v171                    | Listeria_marthii_529731_v1         | 0.8944 |
| Listeria_monocytogenes_1639_v170                    | Listeria_marthii_529731_v1         | 0.9018 |
| Listeria_monocytogenes_1639_v16                     | Listeria_marthii_529731_v1         | 0.8712 |
| Listeria_monocytogenes_1639_v169                    | Listeria_marthii_529731_v1         | 0.8978 |
| Listeria_monocytogenes_1639_v168                    | Listeria_marthii_529731_v1         | 0.8987 |
| Listeria_monocytogenes_1639_v167                    | Listeria_marthii_529731_v1         | 0.9003 |
| Listeria_monocytogenes_1639_v166                    | Listeria_marthii_529731_v1         | 0.899  |
| Listeria_monocytogenes_1639_v165                    | Listeria_marthii_529731_v1         | 0.8974 |
| Listeria_monocytogenes_1639_v164                    | Listeria_marthii_529731_v1         | 0.9123 |
| Listeria_monocytogenes_1639_v163                    | Listeria_marthii_529731_v1         | 0.9048 |
| Listeria_monocytogenes_1639_v162                    | Listeria_marthii_529731_v1         | 0.9123 |
| Listeria_monocytogenes_1639_v161                    | Listeria_marthii_529731_v1         | 0.9135 |
| Listeria_monocytogenes_1639_v160                    | Listeria_marthii_529731_v1         | 0.9139 |
| Listeria_monocytogenes_1639_v15                     | Listeria_marthii_529731_v1         | 0.881  |
| Listeria_monocytogenes_1639_v159                    | Listeria_marthii_529731_v1         | 0.908  |
| Listeria_monocytogenes_1639_v158                    | Listeria_marthii_529731_v1         | 0.9131 |
| Listeria_monocytogenes_1639_v157                    | Listeria_marthii_529731_v1         | 0.9131 |
| Listeria_monocytogenes_1639_v156                    | Listeria_marthii_529731_v1         | 0.8952 |
| Listeria_monocytogenes_1639_v155                    | Listeria_marthii_529731_v1         | 0.906  |
| Listeria_monocytogenes_1639_v154                    | Listeria_marthii_529731_v1         | 0.8958 |
| Listeria_monocytogenes_1639_v153                    | Listeria_marthii_529731_v1         | 0.9135 |
| Listeria_monocytogenes_1639_v152                    | Listeria_marthii_529731_v1         | 0.9083 |
| Listeria_monocytogenes_1639_v151                    | Listeria_marthii_529731_v1         | 0.9083 |
| Listeria_monocytogenes_1639_v150                    | Listeria_marthii_529731_v1         | 0.8987 |
| Listeria_monocytogenes_1639_v14                     | Listeria_marthii_529731_v1         | 0.8871 |
| Listeria_monocytogenes_1639_v149                    | Listeria_marthii_529731_v1         | 0.8986 |
| Listeria_monocytogenes_1639_v148                    | Listeria_marthii_529731_v1         | 0.9069 |
| Listeria_monocytogenes_1639_v147                    | Listeria_marthii_529731_v1         | 0.894  |
| Listeria_monocytogenes_1639_v146                    | Listeria_marthii_529731_v1         | 0.9037 |
| Listeria_monocytogenes_1639_v145                    | Listeria_marthii_529731_v1         | 0.9005 |
| Listeria_monocytogenes_1639_v144                    | Listeria_marthii_529731_v1         | 0.9138 |
| Listeria_monocytogenes_1639_v143                    | Listeria_marthii_529731_v1         | 0.9031 |
| Listeria_monocytogenes_1639_v142                    | Listeria_marthii_529731_v1         | 0.9138 |
| Listeria_monocytogenes_1639_v141                    | Listeria_marthii_529731_v1         | 0.908  |
| Listeria_monocytogenes_1639_v140                    | Listeria_marthii_529731_v1         | 0.9138 |
| Listeria_monocytogenes_1639_v13                     | Listeria_marthii_529731_v1         | 0.8813 |
| Listeria_monocytogenes_1639_v139                    | Listeria_marthii_529731_v1         | 0.9094 |
| Listeria_monocytogenes_1639_v138                    | Listeria_marthii_529731_v1         | 0.915  |
| Listeria_monocytogenes_1639_v137                    | Listeria_marthii_529731_v1         | 0.9143 |
| Listeria_monocytogenes_1639_v136                    | Listeria_marthii_529731_v1         | 0.8962 |
| Listeria_monocytogenes_1639_v135                    | Listeria_marthii_529731_v1         | 0.9105 |
| Listeria_monocytogenes_1639_v134                    | Listeria_marthii_529731_v1         | 0.9078 |
| Listeria_monocytogenes_1639_v133                    | Listeria_marthii_529731_v1         | 0.8981 |
| Listeria_monocytogenes_1639_v132                    | Listeria_marthii_529731_v1         | 0.9132 |
| Listeria_monocytogenes_1639_v131                    | Listeria_marthii_529731_v1         | 0.9085 |
| Listeria_monocytogenes_1639_v130                    | Listeria_marthii_529731_v1         | 0.889  |
| Listeria_monocytogenes_1639_v12                     | Listeria_marthii_529731_v1         | 0.875  |
| Listeria_monocytogenes_1639_v129                    | Listeria_marthii_529731_v1         | 0.9055 |
| Listeria_monocytogenes_1639_v128                    | Listeria_marthii_529731_v1         | 0.9046 |
| Listeria_monocytogenes_1639_v127                    | Listeria_marthii_529731_v1         | 0.9065 |
| Listeria_monocytogenes_1639_v126                    | Listeria_marthii_529731_v1         | 0.9031 |
| Listeria_monocytogenes_1639_v125                    | Listeria_marthii_529731_v1         | 0.8973 |
| Listeria_monocytogenes_1639_v124                    | Listeria_marthii_529731_v1         | 0.9137 |
| Listeria_monocytogenes_1639_v123                    | Listeria_marthii_529731_v1         | 0.9084 |
| Listeria_monocytogenes_1639_v122                    | Listeria_marthii_529731_v1         | 0.9087 |
| Listeria_monocytogenes_1639_v121                    | Listeria_marthii_529731_v1         | 0.9087 |
| Listeria_monocytogenes_1639_v120                    | Listeria_marthii_529731_v1         | 0.9088 |
| Listeria_monocytogenes_1639_v11                     | Listeria_marthii_529731_v1         | 0.8795 |
| Listeria_monocytogenes_1639_v119                    | Listeria_marthii_529731_v1         | 0.9087 |
| Listeria_monocytogenes_1639_v118                    | Listeria_marthii_529731_v1         | 0.9087 |
| Listeria_monocytogenes_1639_v117                    | Listeria_marthii_529731_v1         | 0.8932 |
| Listeria_monocytogenes_1639_v116                    | Listeria_marthii_529731_v1         | 0.9077 |
| Listeria_monocytogenes_1639_v115                    | Listeria_marthii_529731_v1         | 0.9081 |
| Listeria_monocytogenes_1639_v114                    | Listeria_marthii_529731_v1         | 0.8948 |
| Listeria_monocytogenes_1639_v113                    | Listeria_marthii_529731_v1         | 0.9    |
| Listeria_monocytogenes_1639_v112                    | Listeria_marthii_529731_v1         | 0.9081 |
| Listeria_monocytogenes_1639_v111                    | Listeria_marthii_529731_v1         | 0.8938 |
| Listeria_monocytogenes_1639_v110                    | Listeria_marthii_529731_v1         | 0.899  |
| Listeria_monocytogenes_1639_v10                     | Listeria_marthii_529731_v1         | 0.8737 |
| Listeria_monocytogenes_1639_v109                    | Listeria_marthii_529731_v1         | 0.8934 |
| Listeria_monocytogenes_1639_v108                    | Listeria_marthii_529731_v1         | 0.9098 |
| Listeria_monocytogenes_1639_v107                    | Listeria_marthii_529731_v1         | 0.9056 |
| Listeria_monocytogenes_1639_v106                    | Listeria_marthii_529731_v1         | 0.9056 |
| Listeria_monocytogenes_1639_v105                    | Listeria_marthii_529731_v1         | 0.906  |
| Listeria_monocytogenes_1639_v104                    | Listeria_marthii_529731_v1         | 0.906  |
| Listeria_monocytogenes_1639_v103                    | Listeria_marthii_529731_v1         | 0.906  |
| Listeria_monocytogenes_1639_v102                    | Listeria_marthii_529731_v1         | 0.8936 |
| Listeria_monocytogenes_1639_v101                    | Listeria_marthii_529731_v1         | 0.8824 |
| Listeria_monocytogenes_1639_v100                    | Listeria_marthii_529731_v1         | 0.8799 |
| Listeria_monocytogenes_1639                         | Listeria_marthii_529731_v1         | 0.9069 |
| Listeria_monocytogenes_10403S_393133                | Listeria_marthii_529731_v1         | 0.908  |
| Listeria_monocytogenes_08-5923_637381               | Listeria_marthii_529731_v1         | 0.8841 |
| Listeria_monocytogenes_08-5578_653938               | Listeria_marthii_529731_v1         | 0.8709 |
| Listeria_monocytogenes_07PF0776_1126011             | Listeria_marthii_529731_v1         | 0.9097 |
| Listeria_marthii_FSL_S4-120_702457                  | Listeria_marthii_529731_v1         | 0.8756 |
| Listeria_marthii_529731_v1                          | Listeria_marthii_529731_v1         | 0.0624 |
| Listeria_welshimeri_1643                            | Listeria_marthii_FSL_S4-120_702457 | 0.8287 |
| Listeria_welshimeri_serovar_6b_str_SLCC5334_386043  | Listeria_marthii_FSL_S4-120_702457 | 0.8284 |
| Listeria_seeligeri_serovar_1_2b_str_SLCC3954_683837 | Listeria_marthii_FSL_S4-120_702457 | 0.8323 |

|                                                          |                                    |        |
|----------------------------------------------------------|------------------------------------|--------|
| Listeria_seeligeri_FSL_S4-171_702452                     | Listeria_marthii_FSL_S4-120_702457 | 0.7824 |
| Listeria_seeligeri_FSL_N1-067_702453                     | Listeria_marthii_FSL_S4-120_702457 | 0.773  |
| Listeria_seeligeri_1640_v1                               | Listeria_marthii_FSL_S4-120_702457 | 0.8312 |
| Listeria_seeligeri_1640                                  | Listeria_marthii_FSL_S4-120_702457 | 0.8187 |
| Listeria_monocytogenes_WSLC1042_1457188                  | Listeria_marthii_FSL_S4-120_702457 | 0.8628 |
| Listeria_monocytogenes_WSLC1001_1457187                  | Listeria_marthii_FSL_S4-120_702457 | 0.8505 |
| Listeria_monocytogenes_SLCC7179_879090                   | Listeria_marthii_FSL_S4-120_702457 | 0.8593 |
| Listeria_monocytogenes_SLCC5850_882096                   | Listeria_marthii_FSL_S4-120_702457 | 0.8545 |
| Listeria_monocytogenes_SLCC2755_932919                   | Listeria_marthii_FSL_S4-120_702457 | 0.8476 |
| Listeria_monocytogenes_SLCC2540_879089                   | Listeria_marthii_FSL_S4-120_702457 | 0.8501 |
| Listeria_monocytogenes_SLCC2479_882020                   | Listeria_marthii_FSL_S4-120_702457 | 0.8484 |
| Listeria_monocytogenes_SLCC2378_879088                   | Listeria_marthii_FSL_S4-120_702457 | 0.8638 |
| Listeria_monocytogenes_SLCC2376_882097                   | Listeria_marthii_FSL_S4-120_702457 | 0.8784 |
| Listeria_monocytogenes_SLCC2372_932920                   | Listeria_marthii_FSL_S4-120_702457 | 0.8416 |
| Listeria_monocytogenes_serotype_4b_str_LL195_1230340     | Listeria_marthii_FSL_S4-120_702457 | 0.8692 |
| Listeria_monocytogenes_serotype_4b_str_LIS0087_1134669   | Listeria_marthii_FSL_S4-120_702457 | 0.8314 |
| Listeria_monocytogenes_serotype_4b_str_F2365_265669      | Listeria_marthii_FSL_S4-120_702457 | 0.8688 |
| Listeria_monocytogenes_serotype_4b_str_CLIP_80459_568819 | Listeria_marthii_FSL_S4-120_702457 | 0.8699 |
| Listeria_monocytogenes_serotype_4b_str_81-0861_1196161   | Listeria_marthii_FSL_S4-120_702457 | 0.8541 |
| Listeria_monocytogenes_serotype_4b_str_81-0592_1196160   | Listeria_marthii_FSL_S4-120_702457 | 0.8551 |
| Listeria_monocytogenes_serotype_4b_str_81-0558_1196159   | Listeria_marthii_FSL_S4-120_702457 | 0.8543 |
| Listeria_monocytogenes_serotype_4b_str_10-0809_1196162   | Listeria_marthii_FSL_S4-120_702457 | 0.8551 |
| Listeria_monocytogenes_serotype_4b_str_02-6680_1196175   | Listeria_marthii_FSL_S4-120_702457 | 0.8689 |
| Listeria_monocytogenes_serotype_4b_str_02-6679_1196174   | Listeria_marthii_FSL_S4-120_702457 | 0.8689 |
| Listeria_monocytogenes_serotype_4b_str_02-1792_1196173   | Listeria_marthii_FSL_S4-120_702457 | 0.8551 |
| Listeria_monocytogenes_serotype_4b_str_02-1289_1196172   | Listeria_marthii_FSL_S4-120_702457 | 0.8551 |
| Listeria_monocytogenes_serotype_4b_str_02-1103_1196171   | Listeria_marthii_FSL_S4-120_702457 | 0.8551 |
| Listeria_monocytogenes_serotype_3c_str_10-5027_1196195   | Listeria_marthii_FSL_S4-120_702457 | 0.8472 |
| Listeria_monocytogenes_serotype_1_2c_str_10-5026_1196194 | Listeria_marthii_FSL_S4-120_702457 | 0.8481 |
| Listeria_monocytogenes_serotype_1_2c_str_10-5025_1196193 | Listeria_marthii_FSL_S4-120_702457 | 0.8481 |
| Listeria_monocytogenes_serotype_1_2b_str_10-0811_1196164 | Listeria_marthii_FSL_S4-120_702457 | 0.8445 |
| Listeria_monocytogenes_serotype_1_2b_str_10-0810_1196163 | Listeria_marthii_FSL_S4-120_702457 | 0.8445 |
| Listeria_monocytogenes_serotype_1_2a_str_99-6370_1196179 | Listeria_marthii_FSL_S4-120_702457 | 0.834  |
| Listeria_monocytogenes_serotype_1_2a_str_98-2035_1196178 | Listeria_marthii_FSL_S4-120_702457 | 0.834  |
| Listeria_monocytogenes_serotype_1_2a_str_95-0093_1196177 | Listeria_marthii_FSL_S4-120_702457 | 0.8391 |
| Listeria_monocytogenes_serotype_1_2a_str_88-0478_1196176 | Listeria_marthii_FSL_S4-120_702457 | 0.8379 |
| Listeria_monocytogenes_serotype_1_2a_str_10-5024_1196192 | Listeria_marthii_FSL_S4-120_702457 | 0.8391 |
| Listeria_monocytogenes_serotype_1_2a_str_10-4758_1196168 | Listeria_marthii_FSL_S4-120_702457 | 0.8551 |
| Listeria_monocytogenes_serotype_1_2a_str_10-4754_1196167 | Listeria_marthii_FSL_S4-120_702457 | 0.8555 |
| Listeria_monocytogenes_serotype_1_2a_str_10-1321_1196191 | Listeria_marthii_FSL_S4-120_702457 | 0.8391 |
| Listeria_monocytogenes_serotype_1_2a_str_10-1047_1196190 | Listeria_marthii_FSL_S4-120_702457 | 0.8398 |
| Listeria_monocytogenes_serotype_1_2a_str_10-1046_1196189 | Listeria_marthii_FSL_S4-120_702457 | 0.8398 |
| Listeria_monocytogenes_serotype_1_2a_str_10-0934_1196170 | Listeria_marthii_FSL_S4-120_702457 | 0.8658 |
| Listeria_monocytogenes_serotype_1_2a_str_10-0933_1196169 | Listeria_marthii_FSL_S4-120_702457 | 0.8658 |
| Listeria_monocytogenes_serotype_1_2a_str_10-0815_1196188 | Listeria_marthii_FSL_S4-120_702457 | 0.8353 |
| Listeria_monocytogenes_serotype_1_2a_str_10-0814_1196187 | Listeria_marthii_FSL_S4-120_702457 | 0.8395 |
| Listeria_monocytogenes_serotype_1_2a_str_10-0813_1196166 | Listeria_marthii_FSL_S4-120_702457 | 0.8486 |
| Listeria_monocytogenes_serotype_1_2a_str_10-0812_1196165 | Listeria_marthii_FSL_S4-120_702457 | 0.8486 |
| Listeria_monocytogenes_serotype_1_2a_str_08-7669_1196186 | Listeria_marthii_FSL_S4-120_702457 | 0.8482 |
| Listeria_monocytogenes_serotype_1_2a_str_08-7374_1196185 | Listeria_marthii_FSL_S4-120_702457 | 0.8391 |
| Listeria_monocytogenes_serotype_1_2a_str_08-6997_1196184 | Listeria_marthii_FSL_S4-120_702457 | 0.8353 |
| Listeria_monocytogenes_serotype_1_2a_str_08-6569_1196183 | Listeria_marthii_FSL_S4-120_702457 | 0.8353 |
| Listeria_monocytogenes_serotype_1_2a_str_08-6056_1196182 | Listeria_marthii_FSL_S4-120_702457 | 0.8353 |
| Listeria_monocytogenes_serotype_1_2a_str_04-5457_1196181 | Listeria_marthii_FSL_S4-120_702457 | 0.8391 |
| Listeria_monocytogenes_serotype_1_2a_str_02-5993_1196180 | Listeria_marthii_FSL_S4-120_702457 | 0.8391 |
| Listeria_monocytogenes_R479a_1437838                     | Listeria_marthii_FSL_S4-120_702457 | 0.8388 |
| Listeria_monocytogenes_N53-1_1234142                     | Listeria_marthii_FSL_S4-120_702457 | 0.8157 |
| Listeria_monocytogenes_M7_1030009                        | Listeria_marthii_FSL_S4-120_702457 | 0.8513 |
| Listeria_monocytogenes_LO28_393132                       | Listeria_marthii_FSL_S4-120_702457 | 0.8471 |
| Listeria_monocytogenes_L99_563174                        | Listeria_marthii_FSL_S4-120_702457 | 0.8516 |
| Listeria_monocytogenes_L312_882094                       | Listeria_marthii_FSL_S4-120_702457 | 0.8699 |
| Listeria_monocytogenes_J1816_930781                      | Listeria_marthii_FSL_S4-120_702457 | 0.8465 |
| Listeria_monocytogenes_J1-220_930782                     | Listeria_marthii_FSL_S4-120_702457 | 0.8471 |
| Listeria_monocytogenes_J0161_393130                      | Listeria_marthii_FSL_S4-120_702457 | 0.8502 |
| Listeria_monocytogenes_HCC23_552536                      | Listeria_marthii_FSL_S4-120_702457 | 0.8513 |
| Listeria_monocytogenes_FSL_R2-561_393126                 | Listeria_marthii_FSL_S4-120_702457 | 0.8471 |
| Listeria_monocytogenes_FSL_J1-208_393119                 | Listeria_marthii_FSL_S4-120_702457 | 0.867  |
| Listeria_monocytogenes_FSL_J1-175_393118                 | Listeria_marthii_FSL_S4-120_702457 | 0.8553 |
| Listeria_monocytogenes_Finland_1998_393127               | Listeria_marthii_FSL_S4-120_702457 | 0.8674 |
| Listeria_monocytogenes_EGD-e_169963_v1                   | Listeria_marthii_FSL_S4-120_702457 | 0.8569 |
| Listeria_monocytogenes_EGD-e_169963                      | Listeria_marthii_FSL_S4-120_702457 | 0.8573 |
| Listeria_monocytogenes_EGD_1334565                       | Listeria_marthii_FSL_S4-120_702457 | 0.8552 |
| Listeria_monocytogenes_CFSAN002349_1299895               | Listeria_marthii_FSL_S4-120_702457 | 0.8667 |
| Listeria_monocytogenes_ATCC_19117_882095_v1              | Listeria_marthii_FSL_S4-120_702457 | 0.8654 |
| Listeria_monocytogenes_ATCC_19117_882095                 | Listeria_marthii_FSL_S4-120_702457 | 0.8654 |
| Listeria_monocytogenes_6179_1288295                      | Listeria_marthii_FSL_S4-120_702457 | 0.8371 |
| Listeria_monocytogenes_1639_v9                           | Listeria_marthii_FSL_S4-120_702457 | 0.8285 |
| Listeria_monocytogenes_1639_v99                          | Listeria_marthii_FSL_S4-120_702457 | 0.8473 |
| Listeria_monocytogenes_1639_v98                          | Listeria_marthii_FSL_S4-120_702457 | 0.8458 |
| Listeria_monocytogenes_1639_v97                          | Listeria_marthii_FSL_S4-120_702457 | 0.8538 |
| Listeria_monocytogenes_1639_v96                          | Listeria_marthii_FSL_S4-120_702457 | 0.8467 |
| Listeria_monocytogenes_1639_v95                          | Listeria_marthii_FSL_S4-120_702457 | 0.8467 |
| Listeria_monocytogenes_1639_v94                          | Listeria_marthii_FSL_S4-120_702457 | 0.847  |
| Listeria_monocytogenes_1639_v93                          | Listeria_marthii_FSL_S4-120_702457 | 0.8455 |
| Listeria_monocytogenes_1639_v92                          | Listeria_marthii_FSL_S4-120_702457 | 0.847  |
| Listeria_monocytogenes_1639_v91                          | Listeria_marthii_FSL_S4-120_702457 | 0.8509 |
| Listeria_monocytogenes_1639_v90                          | Listeria_marthii_FSL_S4-120_702457 | 0.8458 |
| Listeria_monocytogenes_1639_v8                           | Listeria_marthii_FSL_S4-120_702457 | 0.829  |
| Listeria_monocytogenes_1639_v89                          | Listeria_marthii_FSL_S4-120_702457 | 0.8587 |
| Listeria_monocytogenes_1639_v88                          | Listeria_marthii_FSL_S4-120_702457 | 0.8481 |
| Listeria_monocytogenes_1639_v87                          | Listeria_marthii_FSL_S4-120_702457 | 0.844  |

[illegible]





|                                                          |                                         |        |
|----------------------------------------------------------|-----------------------------------------|--------|
| Listeria_monocytogenes_1639_v100                         | Listeria_marthii_FSL_S4-120_702457      | 0.8379 |
| Listeria_monocytogenes_1639                              | Listeria_marthii_FSL_S4-120_702457      | 0.8664 |
| Listeria_monocytogenes_10403S_393133                     | Listeria_marthii_FSL_S4-120_702457      | 0.8592 |
| Listeria_monocytogenes_08-5923_637381                    | Listeria_marthii_FSL_S4-120_702457      | 0.8391 |
| Listeria_monocytogenes_08-5578_653938                    | Listeria_marthii_FSL_S4-120_702457      | 0.8268 |
| Listeria_monocytogenes_07PF0776_1126011                  | Listeria_marthii_FSL_S4-120_702457      | 0.8661 |
| Listeria_marthii_FSL_S4-120_702457                       | Listeria_marthii_FSL_S4-120_702457      | 0.0457 |
| Listeria_welshimeri_1643                                 | Listeria_monocytogenes_07PF0776_1126011 | 0.8841 |
| Listeria_welshimeri_serovar_6b_str_SLCC5334_386043       | Listeria_monocytogenes_07PF0776_1126011 | 0.8838 |
| Listeria_seeligeri_serovar_1_2b_str_SLCC3954_683837      | Listeria_monocytogenes_07PF0776_1126011 | 0.8875 |
| Listeria_seeligeri_FSL_S4-171_702452                     | Listeria_monocytogenes_07PF0776_1126011 | 0.83   |
| Listeria_seeligeri_FSL_N1-067_702453                     | Listeria_monocytogenes_07PF0776_1126011 | 0.8305 |
| Listeria_seeligeri_1640_v1                               | Listeria_monocytogenes_07PF0776_1126011 | 0.8956 |
| Listeria_seeligeri_1640                                  | Listeria_monocytogenes_07PF0776_1126011 | 0.8855 |
| Listeria_monocytogenes_WSLC1042_1457188                  | Listeria_monocytogenes_07PF0776_1126011 | 0.9832 |
| Listeria_monocytogenes_WSLC1001_1457187                  | Listeria_monocytogenes_07PF0776_1126011 | 0.9299 |
| Listeria_monocytogenes_SLCC7179_879090                   | Listeria_monocytogenes_07PF0776_1126011 | 0.94   |
| Listeria_monocytogenes_SLCC5850_882096                   | Listeria_monocytogenes_07PF0776_1126011 | 0.9345 |
| Listeria_monocytogenes_SLCC2755_932919                   | Listeria_monocytogenes_07PF0776_1126011 | 0.9495 |
| Listeria_monocytogenes_SLCC2540_879089                   | Listeria_monocytogenes_07PF0776_1126011 | 0.9519 |
| Listeria_monocytogenes_SLCC2479_882020                   | Listeria_monocytogenes_07PF0776_1126011 | 0.9288 |
| Listeria_monocytogenes_SLCC2378_879088                   | Listeria_monocytogenes_07PF0776_1126011 | 0.9847 |
| Listeria_monocytogenes_SLCC2376_882097                   | Listeria_monocytogenes_07PF0776_1126011 | 0.9446 |
| Listeria_monocytogenes_SLCC2372_932920                   | Listeria_monocytogenes_07PF0776_1126011 | 0.9215 |
| Listeria_monocytogenes_serotype_4b_str_LL195_1230340     | Listeria_monocytogenes_07PF0776_1126011 | 0.9907 |
| Listeria_monocytogenes_serotype_4b_str_LIS0087_1134669   | Listeria_monocytogenes_07PF0776_1126011 | 0.9103 |
| Listeria_monocytogenes_serotype_4b_str_F2365_265669      | Listeria_monocytogenes_07PF0776_1126011 | 0.9907 |
| Listeria_monocytogenes_serotype_4b_str_CLIP_80459_568819 | Listeria_monocytogenes_07PF0776_1126011 | 0.9791 |
| Listeria_monocytogenes_serotype_4b_str_81-0861_1196161   | Listeria_monocytogenes_07PF0776_1126011 | 0.9727 |
| Listeria_monocytogenes_serotype_4b_str_81-0592_1196160   | Listeria_monocytogenes_07PF0776_1126011 | 0.9738 |
| Listeria_monocytogenes_serotype_4b_str_81-0558_1196159   | Listeria_monocytogenes_07PF0776_1126011 | 0.9738 |
| Listeria_monocytogenes_serotype_4b_str_10-0809_1196162   | Listeria_monocytogenes_07PF0776_1126011 | 0.9742 |
| Listeria_monocytogenes_serotype_4b_str_02-6680_1196175   | Listeria_monocytogenes_07PF0776_1126011 | 0.9773 |
| Listeria_monocytogenes_serotype_4b_str_02-6679_1196174   | Listeria_monocytogenes_07PF0776_1126011 | 0.9773 |
| Listeria_monocytogenes_serotype_4b_str_02-1792_1196173   | Listeria_monocytogenes_07PF0776_1126011 | 0.9742 |
| Listeria_monocytogenes_serotype_4b_str_02-1289_1196172   | Listeria_monocytogenes_07PF0776_1126011 | 0.9742 |
| Listeria_monocytogenes_serotype_4b_str_02-1103_1196171   | Listeria_monocytogenes_07PF0776_1126011 | 0.9742 |
| Listeria_monocytogenes_serotype_3c_str_10-5027_1196195   | Listeria_monocytogenes_07PF0776_1126011 | 0.928  |
| Listeria_monocytogenes_serotype_1_2c_str_10-5026_1196194 | Listeria_monocytogenes_07PF0776_1126011 | 0.9288 |
| Listeria_monocytogenes_serotype_1_2c_str_10-5025_1196193 | Listeria_monocytogenes_07PF0776_1126011 | 0.9288 |
| Listeria_monocytogenes_serotype_1_2b_str_10-0811_1196164 | Listeria_monocytogenes_07PF0776_1126011 | 0.9416 |
| Listeria_monocytogenes_serotype_1_2b_str_10-0810_1196163 | Listeria_monocytogenes_07PF0776_1126011 | 0.9416 |
| Listeria_monocytogenes_serotype_1_2a_str_99-6370_1196179 | Listeria_monocytogenes_07PF0776_1126011 | 0.9155 |
| Listeria_monocytogenes_serotype_1_2a_str_98-2035_1196178 | Listeria_monocytogenes_07PF0776_1126011 | 0.9155 |
| Listeria_monocytogenes_serotype_1_2a_str_95-0093_1196177 | Listeria_monocytogenes_07PF0776_1126011 | 0.921  |
| Listeria_monocytogenes_serotype_1_2a_str_88-0478_1196176 | Listeria_monocytogenes_07PF0776_1126011 | 0.9199 |
| Listeria_monocytogenes_serotype_1_2a_str_10-5024_1196192 | Listeria_monocytogenes_07PF0776_1126011 | 0.921  |
| Listeria_monocytogenes_serotype_1_2a_str_10-4758_1196168 | Listeria_monocytogenes_07PF0776_1126011 | 0.938  |
| Listeria_monocytogenes_serotype_1_2a_str_10-4754_1196167 | Listeria_monocytogenes_07PF0776_1126011 | 0.938  |
| Listeria_monocytogenes_serotype_1_2a_str_10-1321_1196191 | Listeria_monocytogenes_07PF0776_1126011 | 0.921  |
| Listeria_monocytogenes_serotype_1_2a_str_10-1047_1196190 | Listeria_monocytogenes_07PF0776_1126011 | 0.9217 |
| Listeria_monocytogenes_serotype_1_2a_str_10-1046_1196189 | Listeria_monocytogenes_07PF0776_1126011 | 0.9217 |
| Listeria_monocytogenes_serotype_1_2a_str_10-0934_1196170 | Listeria_monocytogenes_07PF0776_1126011 | 0.9461 |
| Listeria_monocytogenes_serotype_1_2a_str_10-0933_1196169 | Listeria_monocytogenes_07PF0776_1126011 | 0.9461 |
| Listeria_monocytogenes_serotype_1_2a_str_10-0815_1196188 | Listeria_monocytogenes_07PF0776_1126011 | 0.9169 |
| Listeria_monocytogenes_serotype_1_2a_str_10-0814_1196187 | Listeria_monocytogenes_07PF0776_1126011 | 0.9214 |
| Listeria_monocytogenes_serotype_1_2a_str_10-0813_1196166 | Listeria_monocytogenes_07PF0776_1126011 | 0.9274 |
| Listeria_monocytogenes_serotype_1_2a_str_10-0812_1196165 | Listeria_monocytogenes_07PF0776_1126011 | 0.9274 |
| Listeria_monocytogenes_serotype_1_2a_str_08-7669_1196186 | Listeria_monocytogenes_07PF0776_1126011 | 0.9304 |
| Listeria_monocytogenes_serotype_1_2a_str_08-7374_1196185 | Listeria_monocytogenes_07PF0776_1126011 | 0.921  |
| Listeria_monocytogenes_serotype_1_2a_str_08-6997_1196184 | Listeria_monocytogenes_07PF0776_1126011 | 0.9169 |
| Listeria_monocytogenes_serotype_1_2a_str_08-6569_1196183 | Listeria_monocytogenes_07PF0776_1126011 | 0.9169 |
| Listeria_monocytogenes_serotype_1_2a_str_08-6056_1196182 | Listeria_monocytogenes_07PF0776_1126011 | 0.9169 |
| Listeria_monocytogenes_serotype_1_2a_str_04-5457_1196181 | Listeria_monocytogenes_07PF0776_1126011 | 0.921  |
| Listeria_monocytogenes_serotype_1_2a_str_02-5993_1196180 | Listeria_monocytogenes_07PF0776_1126011 | 0.921  |
| Listeria_monocytogenes_R479a_1437838                     | Listeria_monocytogenes_07PF0776_1126011 | 0.9203 |
| Listeria_monocytogenes_N53-1_1234142                     | Listeria_monocytogenes_07PF0776_1126011 | 0.8955 |
| Listeria_monocytogenes_M7_1030009                        | Listeria_monocytogenes_07PF0776_1126011 | 0.9099 |
| Listeria_monocytogenes_LO28_393132                       | Listeria_monocytogenes_07PF0776_1126011 | 0.9274 |
| Listeria_monocytogenes_L99_563174                        | Listeria_monocytogenes_07PF0776_1126011 | 0.9102 |
| Listeria_monocytogenes_L312_882094                       | Listeria_monocytogenes_07PF0776_1126011 | 0.9795 |
| Listeria_monocytogenes_J1816_930781                      | Listeria_monocytogenes_07PF0776_1126011 | 0.9516 |
| Listeria_monocytogenes_J1-220_930782                     | Listeria_monocytogenes_07PF0776_1126011 | 0.9522 |
| Listeria_monocytogenes_J0161_393130                      | Listeria_monocytogenes_07PF0776_1126011 | 0.9278 |
| Listeria_monocytogenes_HCC23_552536                      | Listeria_monocytogenes_07PF0776_1126011 | 0.9095 |
| Listeria_monocytogenes_FSL_R2-561_393126                 | Listeria_monocytogenes_07PF0776_1126011 | 0.9274 |
| Listeria_monocytogenes_FSL_J1-208_393119                 | Listeria_monocytogenes_07PF0776_1126011 | 0.921  |
| Listeria_monocytogenes_FSL_J1-175_393118                 | Listeria_monocytogenes_07PF0776_1126011 | 0.9556 |
| Listeria_monocytogenes_Finland_1998_393127               | Listeria_monocytogenes_07PF0776_1126011 | 0.9473 |
| Listeria_monocytogenes_EGD-e_169963_v1                   | Listeria_monocytogenes_07PF0776_1126011 | 0.9366 |
| Listeria_monocytogenes_EGD-e_169963                      | Listeria_monocytogenes_07PF0776_1126011 | 0.937  |
| Listeria_monocytogenes_EGD_1334565                       | Listeria_monocytogenes_07PF0776_1126011 | 0.9352 |
| Listeria_monocytogenes_CFSAN002349_1299895               | Listeria_monocytogenes_07PF0776_1126011 | 0.9754 |
| Listeria_monocytogenes_ATCC_19117_882095_v1              | Listeria_monocytogenes_07PF0776_1126011 | 0.9727 |
| Listeria_monocytogenes_ATCC_19117_882095                 | Listeria_monocytogenes_07PF0776_1126011 | 0.9723 |
| Listeria_monocytogenes_6179_1288295                      | Listeria_monocytogenes_07PF0776_1126011 | 0.9117 |
| Listeria_monocytogenes_1639_v9                           | Listeria_monocytogenes_07PF0776_1126011 | 0.926  |
| Listeria_monocytogenes_1639_v99                          | Listeria_monocytogenes_07PF0776_1126011 | 0.9524 |
| Listeria_monocytogenes_1639_v98                          | Listeria_monocytogenes_07PF0776_1126011 | 0.9247 |
| Listeria_monocytogenes_1639_v97                          | Listeria_monocytogenes_07PF0776_1126011 | 0.9657 |
| Listeria_monocytogenes_1639_v96                          | Listeria_monocytogenes_07PF0776_1126011 | 0.9517 |



[illegible]

[illegible]

|                                                          |                                         |        |
|----------------------------------------------------------|-----------------------------------------|--------|
| Listeria_monocytogenes_1639_v10                          | Listeria_monocytogenes_07PF0776_1126011 | 0.9249 |
| Listeria_monocytogenes_1639_v109                         | Listeria_monocytogenes_07PF0776_1126011 | 0.9277 |
| Listeria_monocytogenes_1639_v108                         | Listeria_monocytogenes_07PF0776_1126011 | 0.9608 |
| Listeria_monocytogenes_1639_v107                         | Listeria_monocytogenes_07PF0776_1126011 | 0.972  |
| Listeria_monocytogenes_1639_v106                         | Listeria_monocytogenes_07PF0776_1126011 | 0.972  |
| Listeria_monocytogenes_1639_v105                         | Listeria_monocytogenes_07PF0776_1126011 | 0.9724 |
| Listeria_monocytogenes_1639_v104                         | Listeria_monocytogenes_07PF0776_1126011 | 0.972  |
| Listeria_monocytogenes_1639_v103                         | Listeria_monocytogenes_07PF0776_1126011 | 0.9723 |
| Listeria_monocytogenes_1639_v102                         | Listeria_monocytogenes_07PF0776_1126011 | 0.9319 |
| Listeria_monocytogenes_1639_v101                         | Listeria_monocytogenes_07PF0776_1126011 | 0.92   |
| Listeria_monocytogenes_1639_v100                         | Listeria_monocytogenes_07PF0776_1126011 | 0.9193 |
| Listeria_monocytogenes_1639                              | Listeria_monocytogenes_07PF0776_1126011 | 0.9468 |
| Listeria_monocytogenes_10403S_393133                     | Listeria_monocytogenes_07PF0776_1126011 | 0.9384 |
| Listeria_monocytogenes_08-5923_637381                    | Listeria_monocytogenes_07PF0776_1126011 | 0.921  |
| Listeria_monocytogenes_08-5578_653938                    | Listeria_monocytogenes_07PF0776_1126011 | 0.9074 |
| Listeria_monocytogenes_07PF0776_1126011                  | Listeria_monocytogenes_07PF0776_1126011 | 0.066  |
| Listeria_welshimeri_1643                                 | Listeria_monocytogenes_08-5578_653938   | 0.8528 |
| Listeria_welshimeri_serovar_6b_str_SLCC5334_386043       | Listeria_monocytogenes_08-5578_653938   | 0.8525 |
| Listeria_seeligeri_serovar_1_2b_str_SLCC3954_683837      | Listeria_monocytogenes_08-5578_653938   | 0.8583 |
| Listeria_seeligeri_FSL_S4-171_702452                     | Listeria_monocytogenes_08-5578_653938   | 0.7994 |
| Listeria_seeligeri_FSL_N1-067_702453                     | Listeria_monocytogenes_08-5578_653938   | 0.8273 |
| Listeria_seeligeri_1640_v1                               | Listeria_monocytogenes_08-5578_653938   | 0.8559 |
| Listeria_seeligeri_1640                                  | Listeria_monocytogenes_08-5578_653938   | 0.8531 |
| Listeria_monocytogenes_WSLC1042_1457188                  | Listeria_monocytogenes_08-5578_653938   | 0.9033 |
| Listeria_monocytogenes_WSLC1001_1457187                  | Listeria_monocytogenes_08-5578_653938   | 0.9381 |
| Listeria_monocytogenes_SLCC7179_879090                   | Listeria_monocytogenes_08-5578_653938   | 0.9339 |
| Listeria_monocytogenes_SLCC5850_882096                   | Listeria_monocytogenes_08-5578_653938   | 0.9382 |
| Listeria_monocytogenes_SLCC2755_932919                   | Listeria_monocytogenes_08-5578_653938   | 0.9128 |
| Listeria_monocytogenes_SLCC2540_879089                   | Listeria_monocytogenes_08-5578_653938   | 0.9212 |
| Listeria_monocytogenes_SLCC2479_882020                   | Listeria_monocytogenes_08-5578_653938   | 0.9367 |
| Listeria_monocytogenes_SLCC2378_879088                   | Listeria_monocytogenes_08-5578_653938   | 0.9043 |
| Listeria_monocytogenes_SLCC2376_882097                   | Listeria_monocytogenes_08-5578_653938   | 0.9075 |
| Listeria_monocytogenes_SLCC2372_932920                   | Listeria_monocytogenes_08-5578_653938   | 0.9375 |
| Listeria_monocytogenes_serotype_4b_str_LL195_1230340     | Listeria_monocytogenes_08-5578_653938   | 0.9089 |
| Listeria_monocytogenes_serotype_4b_str_LIS0087_1134669   | Listeria_monocytogenes_08-5578_653938   | 0.9202 |
| Listeria_monocytogenes_serotype_4b_str_F2365_265669      | Listeria_monocytogenes_08-5578_653938   | 0.9089 |
| Listeria_monocytogenes_serotype_4b_str_CLIP_80459_568819 | Listeria_monocytogenes_08-5578_653938   | 0.9155 |
| Listeria_monocytogenes_serotype_4b_str_81-0861_1196161   | Listeria_monocytogenes_08-5578_653938   | 0.9009 |
| Listeria_monocytogenes_serotype_4b_str_81-0592_1196160   | Listeria_monocytogenes_08-5578_653938   | 0.902  |
| Listeria_monocytogenes_serotype_4b_str_81-0558_1196159   | Listeria_monocytogenes_08-5578_653938   | 0.9023 |
| Listeria_monocytogenes_serotype_4b_str_10-0809_1196162   | Listeria_monocytogenes_08-5578_653938   | 0.902  |
| Listeria_monocytogenes_serotype_4b_str_02-6680_1196175   | Listeria_monocytogenes_08-5578_653938   | 0.9127 |
| Listeria_monocytogenes_serotype_4b_str_02-6679_1196174   | Listeria_monocytogenes_08-5578_653938   | 0.9127 |
| Listeria_monocytogenes_serotype_4b_str_02-1792_1196173   | Listeria_monocytogenes_08-5578_653938   | 0.9034 |
| Listeria_monocytogenes_serotype_4b_str_02-1289_1196172   | Listeria_monocytogenes_08-5578_653938   | 0.9034 |
| Listeria_monocytogenes_serotype_4b_str_02-1103_1196171   | Listeria_monocytogenes_08-5578_653938   | 0.9034 |
| Listeria_monocytogenes_serotype_3c_str_10-5027_1196195   | Listeria_monocytogenes_08-5578_653938   | 0.9396 |
| Listeria_monocytogenes_serotype_1_2c_str_10-5026_1196194 | Listeria_monocytogenes_08-5578_653938   | 0.94   |
| Listeria_monocytogenes_serotype_1_2c_str_10-5025_1196193 | Listeria_monocytogenes_08-5578_653938   | 0.94   |
| Listeria_monocytogenes_serotype_1_2b_str_10-0811_1196164 | Listeria_monocytogenes_08-5578_653938   | 0.9301 |
| Listeria_monocytogenes_serotype_1_2b_str_10-0810_1196163 | Listeria_monocytogenes_08-5578_653938   | 0.9301 |
| Listeria_monocytogenes_serotype_1_2a_str_99-6370_1196179 | Listeria_monocytogenes_08-5578_653938   | 0.9881 |
| Listeria_monocytogenes_serotype_1_2a_str_98-2035_1196178 | Listeria_monocytogenes_08-5578_653938   | 0.9881 |
| Listeria_monocytogenes_serotype_1_2a_str_95-0093_1196177 | Listeria_monocytogenes_08-5578_653938   | 0.9834 |
| Listeria_monocytogenes_serotype_1_2a_str_88-0478_1196176 | Listeria_monocytogenes_08-5578_653938   | 0.979  |
| Listeria_monocytogenes_serotype_1_2a_str_10-5024_1196192 | Listeria_monocytogenes_08-5578_653938   | 0.9848 |
| Listeria_monocytogenes_serotype_1_2a_str_10-4758_1196168 | Listeria_monocytogenes_08-5578_653938   | 0.9361 |
| Listeria_monocytogenes_serotype_1_2a_str_10-4754_1196167 | Listeria_monocytogenes_08-5578_653938   | 0.9364 |
| Listeria_monocytogenes_serotype_1_2a_str_10-1321_1196191 | Listeria_monocytogenes_08-5578_653938   | 0.9848 |
| Listeria_monocytogenes_serotype_1_2a_str_10-1047_1196190 | Listeria_monocytogenes_08-5578_653938   | 0.9819 |
| Listeria_monocytogenes_serotype_1_2a_str_10-1046_1196189 | Listeria_monocytogenes_08-5578_653938   | 0.9819 |
| Listeria_monocytogenes_serotype_1_2a_str_10-0934_1196170 | Listeria_monocytogenes_08-5578_653938   | 0.9349 |
| Listeria_monocytogenes_serotype_1_2a_str_10-0933_1196169 | Listeria_monocytogenes_08-5578_653938   | 0.9349 |
| Listeria_monocytogenes_serotype_1_2a_str_10-0815_1196188 | Listeria_monocytogenes_08-5578_653938   | 0.9899 |
| Listeria_monocytogenes_serotype_1_2a_str_10-0814_1196187 | Listeria_monocytogenes_08-5578_653938   | 0.9852 |
| Listeria_monocytogenes_serotype_1_2a_str_10-0813_1196166 | Listeria_monocytogenes_08-5578_653938   | 0.9401 |
| Listeria_monocytogenes_serotype_1_2a_str_10-0812_1196165 | Listeria_monocytogenes_08-5578_653938   | 0.9401 |
| Listeria_monocytogenes_serotype_1_2a_str_08-7669_1196186 | Listeria_monocytogenes_08-5578_653938   | 0.9748 |
| Listeria_monocytogenes_serotype_1_2a_str_08-7374_1196185 | Listeria_monocytogenes_08-5578_653938   | 0.9848 |
| Listeria_monocytogenes_serotype_1_2a_str_08-6997_1196184 | Listeria_monocytogenes_08-5578_653938   | 0.9899 |
| Listeria_monocytogenes_serotype_1_2a_str_08-6569_1196183 | Listeria_monocytogenes_08-5578_653938   | 0.9899 |
| Listeria_monocytogenes_serotype_1_2a_str_08-6056_1196182 | Listeria_monocytogenes_08-5578_653938   | 0.9899 |
| Listeria_monocytogenes_serotype_1_2a_str_04-5457_1196181 | Listeria_monocytogenes_08-5578_653938   | 0.9848 |
| Listeria_monocytogenes_serotype_1_2a_str_02-5993_1196180 | Listeria_monocytogenes_08-5578_653938   | 0.9848 |
| Listeria_monocytogenes_R479a_1437838                     | Listeria_monocytogenes_08-5578_653938   | 0.9711 |
| Listeria_monocytogenes_N53-1_1234142                     | Listeria_monocytogenes_08-5578_653938   | 0.8807 |
| Listeria_monocytogenes_M7_1030009                        | Listeria_monocytogenes_08-5578_653938   | 0.8878 |
| Listeria_monocytogenes_LO28_393132                       | Listeria_monocytogenes_08-5578_653938   | 0.9299 |
| Listeria_monocytogenes_L99_563174                        | Listeria_monocytogenes_08-5578_653938   | 0.8881 |
| Listeria_monocytogenes_L312_882094                       | Listeria_monocytogenes_08-5578_653938   | 0.9155 |
| Listeria_monocytogenes_J1816_930781                      | Listeria_monocytogenes_08-5578_653938   | 0.9064 |
| Listeria_monocytogenes_J1-220_930782                     | Listeria_monocytogenes_08-5578_653938   | 0.9071 |
| Listeria_monocytogenes_J0161_393130                      | Listeria_monocytogenes_08-5578_653938   | 0.9288 |
| Listeria_monocytogenes_HCC23_552536                      | Listeria_monocytogenes_08-5578_653938   | 0.8874 |
| Listeria_monocytogenes_FSL_R2-561_393126                 | Listeria_monocytogenes_08-5578_653938   | 0.9375 |
| Listeria_monocytogenes_FSL_J1-208_393119                 | Listeria_monocytogenes_08-5578_653938   | 0.8767 |
| Listeria_monocytogenes_FSL_J1-175_393118                 | Listeria_monocytogenes_08-5578_653938   | 0.9191 |
| Listeria_monocytogenes_Finland_1998_393127               | Listeria_monocytogenes_08-5578_653938   | 0.9352 |
| Listeria_monocytogenes_EGD-e_169963_v1                   | Listeria_monocytogenes_08-5578_653938   | 0.9292 |
| Listeria_monocytogenes_EGD-e_169963                      | Listeria_monocytogenes_08-5578_653938   | 0.9296 |
| Listeria_monocytogenes_EGD_1334565                       | Listeria_monocytogenes_08-5578_653938   | 0.9389 |

[illegible]

[illegible]



|                                                          |                                       |        |
|----------------------------------------------------------|---------------------------------------|--------|
| Listeria_monocytogenes_1639_v118                         | Listeria_monocytogenes_08-5578_653938 | 0.9124 |
| Listeria_monocytogenes_1639_v117                         | Listeria_monocytogenes_08-5578_653938 | 0.9336 |
| Listeria_monocytogenes_1639_v116                         | Listeria_monocytogenes_08-5578_653938 | 0.904  |
| Listeria_monocytogenes_1639_v115                         | Listeria_monocytogenes_08-5578_653938 | 0.9043 |
| Listeria_monocytogenes_1639_v114                         | Listeria_monocytogenes_08-5578_653938 | 0.9408 |
| Listeria_monocytogenes_1639_v113                         | Listeria_monocytogenes_08-5578_653938 | 0.9271 |
| Listeria_monocytogenes_1639_v112                         | Listeria_monocytogenes_08-5578_653938 | 0.9117 |
| Listeria_monocytogenes_1639_v111                         | Listeria_monocytogenes_08-5578_653938 | 0.9253 |
| Listeria_monocytogenes_1639_v110                         | Listeria_monocytogenes_08-5578_653938 | 0.9364 |
| Listeria_monocytogenes_1639_v10                          | Listeria_monocytogenes_08-5578_653938 | 0.9096 |
| Listeria_monocytogenes_1639_v109                         | Listeria_monocytogenes_08-5578_653938 | 0.9459 |
| Listeria_monocytogenes_1639_v108                         | Listeria_monocytogenes_08-5578_653938 | 0.9101 |
| Listeria_monocytogenes_1639_v107                         | Listeria_monocytogenes_08-5578_653938 | 0.9067 |
| Listeria_monocytogenes_1639_v106                         | Listeria_monocytogenes_08-5578_653938 | 0.9071 |
| Listeria_monocytogenes_1639_v105                         | Listeria_monocytogenes_08-5578_653938 | 0.9071 |
| Listeria_monocytogenes_1639_v104                         | Listeria_monocytogenes_08-5578_653938 | 0.9071 |
| Listeria_monocytogenes_1639_v103                         | Listeria_monocytogenes_08-5578_653938 | 0.9074 |
| Listeria_monocytogenes_1639_v102                         | Listeria_monocytogenes_08-5578_653938 | 0.9627 |
| Listeria_monocytogenes_1639_v101                         | Listeria_monocytogenes_08-5578_653938 | 0.9704 |
| Listeria_monocytogenes_1639_v100                         | Listeria_monocytogenes_08-5578_653938 | 0.9704 |
| Listeria_monocytogenes_1639                              | Listeria_monocytogenes_08-5578_653938 | 0.9352 |
| Listeria_monocytogenes_10403S_393133                     | Listeria_monocytogenes_08-5578_653938 | 0.9342 |
| Listeria_monocytogenes_08-5923_637381                    | Listeria_monocytogenes_08-5578_653938 | 0.9848 |
| Listeria_monocytogenes_08-5578_653938                    | Listeria_monocytogenes_08-5578_653938 | 0.0734 |
| Listeria_welshimeri_1643                                 | Listeria_monocytogenes_08-5923_637381 | 0.8644 |
| Listeria_welshimeri_serovar_6b_str_SLCC5334_386043       | Listeria_monocytogenes_08-5923_637381 | 0.8638 |
| Listeria_seeligeri_serovar_1_2b_str_SLCC3954_683837      | Listeria_monocytogenes_08-5923_637381 | 0.8702 |
| Listeria_seeligeri_FSL_S4-171_702452                     | Listeria_monocytogenes_08-5923_637381 | 0.8108 |
| Listeria_seeligeri_FSL_N1-067_702453                     | Listeria_monocytogenes_08-5923_637381 | 0.8321 |
| Listeria_seeligeri_1640_v1                               | Listeria_monocytogenes_08-5923_637381 | 0.8676 |
| Listeria_seeligeri_1640                                  | Listeria_monocytogenes_08-5923_637381 | 0.8653 |
| Listeria_monocytogenes_WSLC1042_1457188                  | Listeria_monocytogenes_08-5923_637381 | 0.9164 |
| Listeria_monocytogenes_WSLC1001_1457187                  | Listeria_monocytogenes_08-5923_637381 | 0.952  |
| Listeria_monocytogenes_SLCC7179_879090                   | Listeria_monocytogenes_08-5923_637381 | 0.9486 |
| Listeria_monocytogenes_SLCC5850_882096                   | Listeria_monocytogenes_08-5923_637381 | 0.9522 |
| Listeria_monocytogenes_SLCC2755_932919                   | Listeria_monocytogenes_08-5923_637381 | 0.9177 |
| Listeria_monocytogenes_SLCC2540_879089                   | Listeria_monocytogenes_08-5923_637381 | 0.9349 |
| Listeria_monocytogenes_SLCC2479_882020                   | Listeria_monocytogenes_08-5923_637381 | 0.9509 |
| Listeria_monocytogenes_SLCC2378_879088                   | Listeria_monocytogenes_08-5923_637381 | 0.9178 |
| Listeria_monocytogenes_SLCC2376_882097                   | Listeria_monocytogenes_08-5923_637381 | 0.9216 |
| Listeria_monocytogenes_SLCC2372_932920                   | Listeria_monocytogenes_08-5923_637381 | 0.9439 |
| Listeria_monocytogenes_serotype_4b_str_LL195_1230340     | Listeria_monocytogenes_08-5923_637381 | 0.9229 |
| Listeria_monocytogenes_serotype_4b_str_LIS0087_1134669   | Listeria_monocytogenes_08-5923_637381 | 0.9337 |
| Listeria_monocytogenes_serotype_4b_str_F2365_265669      | Listeria_monocytogenes_08-5923_637381 | 0.9229 |
| Listeria_monocytogenes_serotype_4b_str_CLIP_80459_568819 | Listeria_monocytogenes_08-5923_637381 | 0.9296 |
| Listeria_monocytogenes_serotype_4b_str_81-0861_1196161   | Listeria_monocytogenes_08-5923_637381 | 0.9135 |
| Listeria_monocytogenes_serotype_4b_str_81-0592_1196160   | Listeria_monocytogenes_08-5923_637381 | 0.9145 |
| Listeria_monocytogenes_serotype_4b_str_81-0558_1196159   | Listeria_monocytogenes_08-5923_637381 | 0.9152 |
| Listeria_monocytogenes_serotype_4b_str_10-0809_1196162   | Listeria_monocytogenes_08-5923_637381 | 0.9145 |
| Listeria_monocytogenes_serotype_4b_str_02-6680_1196175   | Listeria_monocytogenes_08-5923_637381 | 0.9263 |
| Listeria_monocytogenes_serotype_4b_str_02-6679_1196174   | Listeria_monocytogenes_08-5923_637381 | 0.9263 |
| Listeria_monocytogenes_serotype_4b_str_02-1792_1196173   | Listeria_monocytogenes_08-5923_637381 | 0.9164 |
| Listeria_monocytogenes_serotype_4b_str_02-1289_1196172   | Listeria_monocytogenes_08-5923_637381 | 0.9164 |
| Listeria_monocytogenes_serotype_4b_str_02-1103_1196171   | Listeria_monocytogenes_08-5923_637381 | 0.9164 |
| Listeria_monocytogenes_serotype_3c_str_10-5027_1196195   | Listeria_monocytogenes_08-5923_637381 | 0.9538 |
| Listeria_monocytogenes_serotype_1_2c_str_10-5026_1196194 | Listeria_monocytogenes_08-5923_637381 | 0.9546 |
| Listeria_monocytogenes_serotype_1_2c_str_10-5025_1196193 | Listeria_monocytogenes_08-5923_637381 | 0.9546 |
| Listeria_monocytogenes_serotype_1_2b_str_10-0811_1196164 | Listeria_monocytogenes_08-5923_637381 | 0.9345 |
| Listeria_monocytogenes_serotype_1_2b_str_10-0810_1196163 | Listeria_monocytogenes_08-5923_637381 | 0.9345 |
| Listeria_monocytogenes_serotype_1_2a_str_99-6370_1196179 | Listeria_monocytogenes_08-5923_637381 | 0.9934 |
| Listeria_monocytogenes_serotype_1_2a_str_98-2035_1196178 | Listeria_monocytogenes_08-5923_637381 | 0.9934 |
| Listeria_monocytogenes_serotype_1_2a_str_95-0093_1196177 | Listeria_monocytogenes_08-5923_637381 | 0.9982 |
| Listeria_monocytogenes_serotype_1_2a_str_88-0478_1196176 | Listeria_monocytogenes_08-5923_637381 | 0.9941 |
| Listeria_monocytogenes_serotype_1_2a_str_10-5024_1196192 | Listeria_monocytogenes_08-5923_637381 | 1      |
| Listeria_monocytogenes_serotype_1_2a_str_10-4758_1196168 | Listeria_monocytogenes_08-5923_637381 | 0.9504 |
| Listeria_monocytogenes_serotype_1_2a_str_10-4754_1196167 | Listeria_monocytogenes_08-5923_637381 | 0.9504 |
| Listeria_monocytogenes_serotype_1_2a_str_10-1321_1196191 | Listeria_monocytogenes_08-5923_637381 | 1      |
| Listeria_monocytogenes_serotype_1_2a_str_10-1047_1196190 | Listeria_monocytogenes_08-5923_637381 | 0.9967 |
| Listeria_monocytogenes_serotype_1_2a_str_10-1046_1196189 | Listeria_monocytogenes_08-5923_637381 | 0.9967 |
| Listeria_monocytogenes_serotype_1_2a_str_10-0934_1196170 | Listeria_monocytogenes_08-5923_637381 | 0.9494 |
| Listeria_monocytogenes_serotype_1_2a_str_10-0933_1196169 | Listeria_monocytogenes_08-5923_637381 | 0.9494 |
| Listeria_monocytogenes_serotype_1_2a_str_10-0815_1196188 | Listeria_monocytogenes_08-5923_637381 | 0.9949 |
| Listeria_monocytogenes_serotype_1_2a_str_10-0814_1196187 | Listeria_monocytogenes_08-5923_637381 | 0.9996 |
| Listeria_monocytogenes_serotype_1_2a_str_10-0813_1196166 | Listeria_monocytogenes_08-5923_637381 | 0.954  |
| Listeria_monocytogenes_serotype_1_2a_str_10-0812_1196165 | Listeria_monocytogenes_08-5923_637381 | 0.954  |
| Listeria_monocytogenes_serotype_1_2a_str_08-7669_1196186 | Listeria_monocytogenes_08-5923_637381 | 0.9896 |
| Listeria_monocytogenes_serotype_1_2a_str_08-7374_1196185 | Listeria_monocytogenes_08-5923_637381 | 1      |
| Listeria_monocytogenes_serotype_1_2a_str_08-6997_1196184 | Listeria_monocytogenes_08-5923_637381 | 0.9949 |
| Listeria_monocytogenes_serotype_1_2a_str_08-6569_1196183 | Listeria_monocytogenes_08-5923_637381 | 0.9949 |
| Listeria_monocytogenes_serotype_1_2a_str_08-6056_1196182 | Listeria_monocytogenes_08-5923_637381 | 0.9949 |
| Listeria_monocytogenes_serotype_1_2a_str_04-5457_1196181 | Listeria_monocytogenes_08-5923_637381 | 1      |
| Listeria_monocytogenes_serotype_1_2a_str_02-5993_1196180 | Listeria_monocytogenes_08-5923_637381 | 0.9996 |
| Listeria_monocytogenes_R479a_1437838                     | Listeria_monocytogenes_08-5923_637381 | 0.9677 |
| Listeria_monocytogenes_N53-1_1234142                     | Listeria_monocytogenes_08-5923_637381 | 0.8937 |
| Listeria_monocytogenes_M7_1030009                        | Listeria_monocytogenes_08-5923_637381 | 0.8993 |
| Listeria_monocytogenes_LO28_393132                       | Listeria_monocytogenes_08-5923_637381 | 0.944  |
| Listeria_monocytogenes_L99_563174                        | Listeria_monocytogenes_08-5923_637381 | 0.8999 |
| Listeria_monocytogenes_L312_882094                       | Listeria_monocytogenes_08-5923_637381 | 0.9296 |
| Listeria_monocytogenes_J1816_930781                      | Listeria_monocytogenes_08-5923_637381 | 0.92   |
| Listeria_monocytogenes_J1-220_930782                     | Listeria_monocytogenes_08-5923_637381 | 0.9196 |
| Listeria_monocytogenes_J0161_393130                      | Listeria_monocytogenes_08-5923_637381 | 0.9428 |



[illegible]

[illegible]

|                                                          |                                       |        |
|----------------------------------------------------------|---------------------------------------|--------|
| Listeria_monocytogenes_1639_v125                         | Listeria_monocytogenes_08-5923_637381 | 0.9461 |
| Listeria_monocytogenes_1639_v124                         | Listeria_monocytogenes_08-5923_637381 | 0.9058 |
| Listeria_monocytogenes_1639_v123                         | Listeria_monocytogenes_08-5923_637381 | 0.9264 |
| Listeria_monocytogenes_1639_v122                         | Listeria_monocytogenes_08-5923_637381 | 0.9264 |
| Listeria_monocytogenes_1639_v121                         | Listeria_monocytogenes_08-5923_637381 | 0.9264 |
| Listeria_monocytogenes_1639_v120                         | Listeria_monocytogenes_08-5923_637381 | 0.9261 |
| Listeria_monocytogenes_1639_v11                          | Listeria_monocytogenes_08-5923_637381 | 0.9396 |
| Listeria_monocytogenes_1639_v119                         | Listeria_monocytogenes_08-5923_637381 | 0.9264 |
| Listeria_monocytogenes_1639_v118                         | Listeria_monocytogenes_08-5923_637381 | 0.9264 |
| Listeria_monocytogenes_1639_v117                         | Listeria_monocytogenes_08-5923_637381 | 0.9478 |
| Listeria_monocytogenes_1639_v116                         | Listeria_monocytogenes_08-5923_637381 | 0.9171 |
| Listeria_monocytogenes_1639_v115                         | Listeria_monocytogenes_08-5923_637381 | 0.9174 |
| Listeria_monocytogenes_1639_v114                         | Listeria_monocytogenes_08-5923_637381 | 0.9555 |
| Listeria_monocytogenes_1639_v113                         | Listeria_monocytogenes_08-5923_637381 | 0.9413 |
| Listeria_monocytogenes_1639_v112                         | Listeria_monocytogenes_08-5923_637381 | 0.9245 |
| Listeria_monocytogenes_1639_v111                         | Listeria_monocytogenes_08-5923_637381 | 0.9234 |
| Listeria_monocytogenes_1639_v110                         | Listeria_monocytogenes_08-5923_637381 | 0.9503 |
| Listeria_monocytogenes_1639_v10                          | Listeria_monocytogenes_08-5923_637381 | 0.922  |
| Listeria_monocytogenes_1639_v109                         | Listeria_monocytogenes_08-5923_637381 | 0.9603 |
| Listeria_monocytogenes_1639_v108                         | Listeria_monocytogenes_08-5923_637381 | 0.9232 |
| Listeria_monocytogenes_1639_v107                         | Listeria_monocytogenes_08-5923_637381 | 0.9199 |
| Listeria_monocytogenes_1639_v106                         | Listeria_monocytogenes_08-5923_637381 | 0.9203 |
| Listeria_monocytogenes_1639_v105                         | Listeria_monocytogenes_08-5923_637381 | 0.9203 |
| Listeria_monocytogenes_1639_v104                         | Listeria_monocytogenes_08-5923_637381 | 0.9206 |
| Listeria_monocytogenes_1639_v103                         | Listeria_monocytogenes_08-5923_637381 | 0.9206 |
| Listeria_monocytogenes_1639_v102                         | Listeria_monocytogenes_08-5923_637381 | 0.9777 |
| Listeria_monocytogenes_1639_v101                         | Listeria_monocytogenes_08-5923_637381 | 0.9674 |
| Listeria_monocytogenes_1639_v100                         | Listeria_monocytogenes_08-5923_637381 | 0.967  |
| Listeria_monocytogenes_1639                              | Listeria_monocytogenes_08-5923_637381 | 0.9497 |
| Listeria_monocytogenes_10403S_393133                     | Listeria_monocytogenes_08-5923_637381 | 0.9486 |
| Listeria_monocytogenes_08-5923_637381                    | Listeria_monocytogenes_08-5923_637381 | 0.0664 |
| Listeria_welshimeri_1643                                 | Listeria_monocytogenes_10403S_393133  | 0.8766 |
| Listeria_welshimeri_serovar_6b_str_SLCC5334_386043       | Listeria_monocytogenes_10403S_393133  | 0.8763 |
| Listeria_seeligeri_serovar_1_2b_str_SLCC3954_683837      | Listeria_monocytogenes_10403S_393133  | 0.8881 |
| Listeria_seeligeri_FSL_S4-171_702452                     | Listeria_monocytogenes_10403S_393133  | 0.8229 |
| Listeria_seeligeri_FSL_N1-067_702453                     | Listeria_monocytogenes_10403S_393133  | 0.8315 |
| Listeria_seeligeri_1640_v1                               | Listeria_monocytogenes_10403S_393133  | 0.8861 |
| Listeria_seeligeri_1640                                  | Listeria_monocytogenes_10403S_393133  | 0.8846 |
| Listeria_monocytogenes_WSLC1042_1457188                  | Listeria_monocytogenes_10403S_393133  | 0.9327 |
| Listeria_monocytogenes_WSLC1001_1457187                  | Listeria_monocytogenes_10403S_393133  | 0.9737 |
| Listeria_monocytogenes_SLCC7179_879090                   | Listeria_monocytogenes_10403S_393133  | 0.9731 |
| Listeria_monocytogenes_SLCC5850_882096                   | Listeria_monocytogenes_10403S_393133  | 0.9778 |
| Listeria_monocytogenes_SLCC2755_932919                   | Listeria_monocytogenes_10403S_393133  | 0.9371 |
| Listeria_monocytogenes_SLCC2540_879089                   | Listeria_monocytogenes_10403S_393133  | 0.938  |
| Listeria_monocytogenes_SLCC2479_882020                   | Listeria_monocytogenes_10403S_393133  | 0.9516 |
| Listeria_monocytogenes_SLCC2378_879088                   | Listeria_monocytogenes_10403S_393133  | 0.9338 |
| Listeria_monocytogenes_SLCC2376_882097                   | Listeria_monocytogenes_10403S_393133  | 0.9474 |
| Listeria_monocytogenes_SLCC2372_932920                   | Listeria_monocytogenes_10403S_393133  | 0.9441 |
| Listeria_monocytogenes_serotype_4b_str_LL195_1230340     | Listeria_monocytogenes_10403S_393133  | 0.9399 |
| Listeria_monocytogenes_serotype_4b_str_LIS0087_1134669   | Listeria_monocytogenes_10403S_393133  | 0.9711 |
| Listeria_monocytogenes_serotype_4b_str_F2365_265669      | Listeria_monocytogenes_10403S_393133  | 0.9399 |
| Listeria_monocytogenes_serotype_4b_str_CLIP_80459_568819 | Listeria_monocytogenes_10403S_393133  | 0.9464 |
| Listeria_monocytogenes_serotype_4b_str_81-0861_1196161   | Listeria_monocytogenes_10403S_393133  | 0.9357 |
| Listeria_monocytogenes_serotype_4b_str_81-0592_1196160   | Listeria_monocytogenes_10403S_393133  | 0.9368 |
| Listeria_monocytogenes_serotype_4b_str_81-0558_1196159   | Listeria_monocytogenes_10403S_393133  | 0.9371 |
| Listeria_monocytogenes_serotype_4b_str_10-0809_1196162   | Listeria_monocytogenes_10403S_393133  | 0.9368 |
| Listeria_monocytogenes_serotype_4b_str_02-6680_1196175   | Listeria_monocytogenes_10403S_393133  | 0.9454 |
| Listeria_monocytogenes_serotype_4b_str_02-6679_1196174   | Listeria_monocytogenes_10403S_393133  | 0.9454 |
| Listeria_monocytogenes_serotype_4b_str_02-1792_1196173   | Listeria_monocytogenes_10403S_393133  | 0.936  |
| Listeria_monocytogenes_serotype_4b_str_02-1289_1196172   | Listeria_monocytogenes_10403S_393133  | 0.936  |
| Listeria_monocytogenes_serotype_4b_str_02-1103_1196171   | Listeria_monocytogenes_10403S_393133  | 0.936  |
| Listeria_monocytogenes_serotype_3c_str_10-5027_1196195   | Listeria_monocytogenes_10403S_393133  | 0.9501 |
| Listeria_monocytogenes_serotype_1_2c_str_10-5026_1196194 | Listeria_monocytogenes_10403S_393133  | 0.9512 |
| Listeria_monocytogenes_serotype_1_2c_str_10-5025_1196193 | Listeria_monocytogenes_10403S_393133  | 0.9512 |
| Listeria_monocytogenes_serotype_1_2b_str_10-0811_1196164 | Listeria_monocytogenes_10403S_393133  | 0.9417 |
| Listeria_monocytogenes_serotype_1_2b_str_10-0810_1196163 | Listeria_monocytogenes_10403S_393133  | 0.9417 |
| Listeria_monocytogenes_serotype_1_2a_str_99-6370_1196179 | Listeria_monocytogenes_10403S_393133  | 0.9426 |
| Listeria_monocytogenes_serotype_1_2a_str_98-2035_1196178 | Listeria_monocytogenes_10403S_393133  | 0.9426 |
| Listeria_monocytogenes_serotype_1_2a_str_95-0093_1196177 | Listeria_monocytogenes_10403S_393133  | 0.9486 |
| Listeria_monocytogenes_serotype_1_2a_str_88-0478_1196176 | Listeria_monocytogenes_10403S_393133  | 0.9474 |
| Listeria_monocytogenes_serotype_1_2a_str_10-5024_1196192 | Listeria_monocytogenes_10403S_393133  | 0.9486 |
| Listeria_monocytogenes_serotype_1_2a_str_10-4758_1196168 | Listeria_monocytogenes_10403S_393133  | 0.958  |
| Listeria_monocytogenes_serotype_1_2a_str_10-4754_1196167 | Listeria_monocytogenes_10403S_393133  | 0.9584 |
| Listeria_monocytogenes_serotype_1_2a_str_10-1321_1196191 | Listeria_monocytogenes_10403S_393133  | 0.9486 |
| Listeria_monocytogenes_serotype_1_2a_str_10-1047_1196190 | Listeria_monocytogenes_10403S_393133  | 0.9493 |
| Listeria_monocytogenes_serotype_1_2a_str_10-1046_1196189 | Listeria_monocytogenes_10403S_393133  | 0.9493 |
| Listeria_monocytogenes_serotype_1_2a_str_10-0934_1196170 | Listeria_monocytogenes_10403S_393133  | 0.9776 |
| Listeria_monocytogenes_serotype_1_2a_str_10-0933_1196169 | Listeria_monocytogenes_10403S_393133  | 0.9776 |
| Listeria_monocytogenes_serotype_1_2a_str_10-0815_1196188 | Listeria_monocytogenes_10403S_393133  | 0.944  |
| Listeria_monocytogenes_serotype_1_2a_str_10-0814_1196187 | Listeria_monocytogenes_10403S_393133  | 0.9486 |
| Listeria_monocytogenes_serotype_1_2a_str_10-0813_1196166 | Listeria_monocytogenes_10403S_393133  | 0.9825 |
| Listeria_monocytogenes_serotype_1_2a_str_10-0812_1196165 | Listeria_monocytogenes_10403S_393133  | 0.9825 |
| Listeria_monocytogenes_serotype_1_2a_str_08-7669_1196186 | Listeria_monocytogenes_10403S_393133  | 0.9586 |
| Listeria_monocytogenes_serotype_1_2a_str_08-7374_1196185 | Listeria_monocytogenes_10403S_393133  | 0.9486 |
| Listeria_monocytogenes_serotype_1_2a_str_08-6997_1196184 | Listeria_monocytogenes_10403S_393133  | 0.944  |
| Listeria_monocytogenes_serotype_1_2a_str_08-6569_1196183 | Listeria_monocytogenes_10403S_393133  | 0.944  |
| Listeria_monocytogenes_serotype_1_2a_str_08-6056_1196182 | Listeria_monocytogenes_10403S_393133  | 0.944  |
| Listeria_monocytogenes_serotype_1_2a_str_04-5457_1196181 | Listeria_monocytogenes_10403S_393133  | 0.9486 |
| Listeria_monocytogenes_serotype_1_2a_str_02-5993_1196180 | Listeria_monocytogenes_10403S_393133  | 0.9486 |
| Listeria_monocytogenes_R479a_1437838                     | Listeria_monocytogenes_10403S_393133  | 0.9449 |
| Listeria_monocytogenes_N53-1_1234142                     | Listeria_monocytogenes_10403S_393133  | 0.9182 |

|                                             |                                      |        |
|---------------------------------------------|--------------------------------------|--------|
| Listeria_monocytogenes_M7_1030009           | Listeria_monocytogenes_10403S_393133 | 0.9123 |
| Listeria_monocytogenes_LO28_393132          | Listeria_monocytogenes_10403S_393133 | 0.9562 |
| Listeria_monocytogenes_L99_563174           | Listeria_monocytogenes_10403S_393133 | 0.9126 |
| Listeria_monocytogenes_L312_882094          | Listeria_monocytogenes_10403S_393133 | 0.9464 |
| Listeria_monocytogenes_J1816_930781         | Listeria_monocytogenes_10403S_393133 | 0.9314 |
| Listeria_monocytogenes_J1-220_930782        | Listeria_monocytogenes_10403S_393133 | 0.932  |
| Listeria_monocytogenes_J0161_393130         | Listeria_monocytogenes_10403S_393133 | 0.9596 |
| Listeria_monocytogenes_HCC23_552536         | Listeria_monocytogenes_10403S_393133 | 0.9123 |
| Listeria_monocytogenes_FSL_R2-561_393126    | Listeria_monocytogenes_10403S_393133 | 0.949  |
| Listeria_monocytogenes_FSL_J1-208_393119    | Listeria_monocytogenes_10403S_393133 | 0.912  |
| Listeria_monocytogenes_FSL_J1-175_393118    | Listeria_monocytogenes_10403S_393133 | 0.943  |
| Listeria_monocytogenes_Finland_1998_393127  | Listeria_monocytogenes_10403S_393133 | 0.9656 |
| Listeria_monocytogenes_EGD-e_169963_v1      | Listeria_monocytogenes_10403S_393133 | 0.968  |
| Listeria_monocytogenes_EGD-e_169963         | Listeria_monocytogenes_10403S_393133 | 0.968  |
| Listeria_monocytogenes_EGD_1334565          | Listeria_monocytogenes_10403S_393133 | 0.9786 |
| Listeria_monocytogenes_CFSAN002349_1299895  | Listeria_monocytogenes_10403S_393133 | 0.9458 |
| Listeria_monocytogenes_ATCC_19117_882095_v1 | Listeria_monocytogenes_10403S_393133 | 0.9409 |
| Listeria_monocytogenes_ATCC_19117_882095    | Listeria_monocytogenes_10403S_393133 | 0.9405 |
| Listeria_monocytogenes_6179_1288295         | Listeria_monocytogenes_10403S_393133 | 0.9438 |
| Listeria_monocytogenes_1639_v9              | Listeria_monocytogenes_10403S_393133 | 0.9265 |
| Listeria_monocytogenes_1639_v99             | Listeria_monocytogenes_10403S_393133 | 0.9333 |
| Listeria_monocytogenes_1639_v98             | Listeria_monocytogenes_10403S_393133 | 0.9558 |
| Listeria_monocytogenes_1639_v97             | Listeria_monocytogenes_10403S_393133 | 0.9369 |
| Listeria_monocytogenes_1639_v96             | Listeria_monocytogenes_10403S_393133 | 0.9311 |
| Listeria_monocytogenes_1639_v95             | Listeria_monocytogenes_10403S_393133 | 0.9311 |
| Listeria_monocytogenes_1639_v94             | Listeria_monocytogenes_10403S_393133 | 0.9318 |
| Listeria_monocytogenes_1639_v93             | Listeria_monocytogenes_10403S_393133 | 0.9437 |
| Listeria_monocytogenes_1639_v92             | Listeria_monocytogenes_10403S_393133 | 0.9333 |
| Listeria_monocytogenes_1639_v91             | Listeria_monocytogenes_10403S_393133 | 0.9324 |
| Listeria_monocytogenes_1639_v90             | Listeria_monocytogenes_10403S_393133 | 0.9558 |
| Listeria_monocytogenes_1639_v8              | Listeria_monocytogenes_10403S_393133 | 0.9355 |
| Listeria_monocytogenes_1639_v89             | Listeria_monocytogenes_10403S_393133 | 0.9469 |
| Listeria_monocytogenes_1639_v88             | Listeria_monocytogenes_10403S_393133 | 0.9617 |
| Listeria_monocytogenes_1639_v87             | Listeria_monocytogenes_10403S_393133 | 0.9766 |
| Listeria_monocytogenes_1639_v86             | Listeria_monocytogenes_10403S_393133 | 0.977  |
| Listeria_monocytogenes_1639_v85             | Listeria_monocytogenes_10403S_393133 | 0.935  |
| Listeria_monocytogenes_1639_v84             | Listeria_monocytogenes_10403S_393133 | 0.9548 |
| Listeria_monocytogenes_1639_v83             | Listeria_monocytogenes_10403S_393133 | 0.9416 |
| Listeria_monocytogenes_1639_v82             | Listeria_monocytogenes_10403S_393133 | 0.9413 |
| Listeria_monocytogenes_1639_v81             | Listeria_monocytogenes_10403S_393133 | 0.95   |
| Listeria_monocytogenes_1639_v80             | Listeria_monocytogenes_10403S_393133 | 0.9438 |
| Listeria_monocytogenes_1639_v7              | Listeria_monocytogenes_10403S_393133 | 0.9355 |
| Listeria_monocytogenes_1639_v79             | Listeria_monocytogenes_10403S_393133 | 0.9482 |
| Listeria_monocytogenes_1639_v78             | Listeria_monocytogenes_10403S_393133 | 0.9496 |
| Listeria_monocytogenes_1639_v77             | Listeria_monocytogenes_10403S_393133 | 0.954  |
| Listeria_monocytogenes_1639_v76             | Listeria_monocytogenes_10403S_393133 | 0.9444 |
| Listeria_monocytogenes_1639_v75             | Listeria_monocytogenes_10403S_393133 | 0.9126 |
| Listeria_monocytogenes_1639_v74             | Listeria_monocytogenes_10403S_393133 | 0.9743 |
| Listeria_monocytogenes_1639_v73             | Listeria_monocytogenes_10403S_393133 | 0.952  |
| Listeria_monocytogenes_1639_v72             | Listeria_monocytogenes_10403S_393133 | 0.9389 |
| Listeria_monocytogenes_1639_v71             | Listeria_monocytogenes_10403S_393133 | 0.9363 |
| Listeria_monocytogenes_1639_v70             | Listeria_monocytogenes_10403S_393133 | 0.9473 |
| Listeria_monocytogenes_1639_v6              | Listeria_monocytogenes_10403S_393133 | 0.9351 |
| Listeria_monocytogenes_1639_v69             | Listeria_monocytogenes_10403S_393133 | 0.9368 |
| Listeria_monocytogenes_1639_v68             | Listeria_monocytogenes_10403S_393133 | 0.9591 |
| Listeria_monocytogenes_1639_v67             | Listeria_monocytogenes_10403S_393133 | 0.9397 |
| Listeria_monocytogenes_1639_v66             | Listeria_monocytogenes_10403S_393133 | 0.9554 |
| Listeria_monocytogenes_1639_v65             | Listeria_monocytogenes_10403S_393133 | 0.9567 |
| Listeria_monocytogenes_1639_v64             | Listeria_monocytogenes_10403S_393133 | 0.9474 |
| Listeria_monocytogenes_1639_v63             | Listeria_monocytogenes_10403S_393133 | 0.9314 |
| Listeria_monocytogenes_1639_v62             | Listeria_monocytogenes_10403S_393133 | 0.9472 |
| Listeria_monocytogenes_1639_v61             | Listeria_monocytogenes_10403S_393133 | 0.9514 |
| Listeria_monocytogenes_1639_v60             | Listeria_monocytogenes_10403S_393133 | 0.9553 |
| Listeria_monocytogenes_1639_v5              | Listeria_monocytogenes_10403S_393133 | 0.9062 |
| Listeria_monocytogenes_1639_v59             | Listeria_monocytogenes_10403S_393133 | 0.9325 |
| Listeria_monocytogenes_1639_v58             | Listeria_monocytogenes_10403S_393133 | 0.9404 |
| Listeria_monocytogenes_1639_v57             | Listeria_monocytogenes_10403S_393133 | 0.9265 |
| Listeria_monocytogenes_1639_v56             | Listeria_monocytogenes_10403S_393133 | 0.9359 |
| Listeria_monocyt                            |                                      |        |

[illegible]



|                                                          |                                      |        |
|----------------------------------------------------------|--------------------------------------|--------|
| Listeria_monocytogenes_1639_v131                         | Listeria_monocytogenes_10403S_393133 | 0.9437 |
| Listeria_monocytogenes_1639_v130                         | Listeria_monocytogenes_10403S_393133 | 0.9479 |
| Listeria_monocytogenes_1639_v12                          | Listeria_monocytogenes_10403S_393133 | 0.9309 |
| Listeria_monocytogenes_1639_v129                         | Listeria_monocytogenes_10403S_393133 | 0.9503 |
| Listeria_monocytogenes_1639_v128                         | Listeria_monocytogenes_10403S_393133 | 0.9493 |
| Listeria_monocytogenes_1639_v127                         | Listeria_monocytogenes_10403S_393133 | 0.9684 |
| Listeria_monocytogenes_1639_v126                         | Listeria_monocytogenes_10403S_393133 | 0.9501 |
| Listeria_monocytogenes_1639_v125                         | Listeria_monocytogenes_10403S_393133 | 0.9598 |
| Listeria_monocytogenes_1639_v124                         | Listeria_monocytogenes_10403S_393133 | 0.9311 |
| Listeria_monocytogenes_1639_v123                         | Listeria_monocytogenes_10403S_393133 | 0.9454 |
| Listeria_monocytogenes_1639_v122                         | Listeria_monocytogenes_10403S_393133 | 0.945  |
| Listeria_monocytogenes_1639_v121                         | Listeria_monocytogenes_10403S_393133 | 0.945  |
| Listeria_monocytogenes_1639_v120                         | Listeria_monocytogenes_10403S_393133 | 0.945  |
| Listeria_monocytogenes_1639_v11                          | Listeria_monocytogenes_10403S_393133 | 0.9415 |
| Listeria_monocytogenes_1639_v119                         | Listeria_monocytogenes_10403S_393133 | 0.945  |
| Listeria_monocytogenes_1639_v118                         | Listeria_monocytogenes_10403S_393133 | 0.945  |
| Listeria_monocytogenes_1639_v117                         | Listeria_monocytogenes_10403S_393133 | 0.9569 |
| Listeria_monocytogenes_1639_v116                         | Listeria_monocytogenes_10403S_393133 | 0.9342 |
| Listeria_monocytogenes_1639_v115                         | Listeria_monocytogenes_10403S_393133 | 0.9338 |
| Listeria_monocytogenes_1639_v114                         | Listeria_monocytogenes_10403S_393133 | 0.9768 |
| Listeria_monocytogenes_1639_v113                         | Listeria_monocytogenes_10403S_393133 | 0.9445 |
| Listeria_monocytogenes_1639_v112                         | Listeria_monocytogenes_10403S_393133 | 0.9356 |
| Listeria_monocytogenes_1639_v111                         | Listeria_monocytogenes_10403S_393133 | 0.9418 |
| Listeria_monocytogenes_1639_v110                         | Listeria_monocytogenes_10403S_393133 | 0.9871 |
| Listeria_monocytogenes_1639_v10                          | Listeria_monocytogenes_10403S_393133 | 0.9158 |
| Listeria_monocytogenes_1639_v109                         | Listeria_monocytogenes_10403S_393133 | 0.9742 |
| Listeria_monocytogenes_1639_v108                         | Listeria_monocytogenes_10403S_393133 | 0.9438 |
| Listeria_monocytogenes_1639_v107                         | Listeria_monocytogenes_10403S_393133 | 0.9394 |
| Listeria_monocytogenes_1639_v106                         | Listeria_monocytogenes_10403S_393133 | 0.9398 |
| Listeria_monocytogenes_1639_v105                         | Listeria_monocytogenes_10403S_393133 | 0.9398 |
| Listeria_monocytogenes_1639_v104                         | Listeria_monocytogenes_10403S_393133 | 0.9398 |
| Listeria_monocytogenes_1639_v103                         | Listeria_monocytogenes_10403S_393133 | 0.9402 |
| Listeria_monocytogenes_1639_v102                         | Listeria_monocytogenes_10403S_393133 | 0.9567 |
| Listeria_monocytogenes_1639_v101                         | Listeria_monocytogenes_10403S_393133 | 0.9445 |
| Listeria_monocytogenes_1639_v100                         | Listeria_monocytogenes_10403S_393133 | 0.9438 |
| Listeria_monocytogenes_1639                              | Listeria_monocytogenes_10403S_393133 | 0.9899 |
| Listeria_monocytogenes_10403S_393133                     | Listeria_monocytogenes_10403S_393133 | 0.0676 |
| Listeria_welshimeri_1643                                 | Listeria_monocytogenes_1639          | 0.883  |
| Listeria_welshimeri_serovar_6b_str_SLCC5334_386043       | Listeria_monocytogenes_1639          | 0.8827 |
| Listeria_seeligeri_serovar_1_2b_str_SLCC3954_683837      | Listeria_monocytogenes_1639          | 0.895  |
| Listeria_seeligeri_FSL_S4-171_702452                     | Listeria_monocytogenes_1639          | 0.8266 |
| Listeria_seeligeri_FSL_N1-067_702453                     | Listeria_monocytogenes_1639          | 0.836  |
| Listeria_seeligeri_1640_v1                               | Listeria_monocytogenes_1639          | 0.8933 |
| Listeria_seeligeri_1640                                  | Listeria_monocytogenes_1639          | 0.8837 |
| Listeria_monocytogenes_WSLC1042_1457188                  | Listeria_monocytogenes_1639          | 0.9411 |
| Listeria_monocytogenes_WSLC1001_1457187                  | Listeria_monocytogenes_1639          | 0.9804 |
| Listeria_monocytogenes_SLCC7179_879090                   | Listeria_monocytogenes_1639          | 0.9698 |
| Listeria_monocytogenes_SLCC5850_882096                   | Listeria_monocytogenes_1639          | 0.9854 |
| Listeria_monocytogenes_SLCC2755_932919                   | Listeria_monocytogenes_1639          | 0.9454 |
| Listeria_monocytogenes_SLCC2540_879089                   | Listeria_monocytogenes_1639          | 0.9447 |
| Listeria_monocytogenes_SLCC2479_882020                   | Listeria_monocytogenes_1639          | 0.9547 |
| Listeria_monocytogenes_SLCC2378_879088                   | Listeria_monocytogenes_1639          | 0.9422 |
| Listeria_monocytogenes_SLCC2376_882097                   | Listeria_monocytogenes_1639          | 0.9556 |
| Listeria_monocytogenes_SLCC2372_932920                   | Listeria_monocytogenes_1639          | 0.9471 |
| Listeria_monocytogenes_serotype_4b_str_LL195_1230340     | Listeria_monocytogenes_1639          | 0.9484 |
| Listeria_monocytogenes_serotype_4b_str_LIS0087_1134669   | Listeria_monocytogenes_1639          | 0.9611 |
| Listeria_monocytogenes_serotype_4b_str_F2365_265669      | Listeria_monocytogenes_1639          | 0.9484 |
| Listeria_monocytogenes_serotype_4b_str_CLIP_80459_568819 | Listeria_monocytogenes_1639          | 0.9549 |
| Listeria_monocytogenes_serotype_4b_str_81-0861_1196161   | Listeria_monocytogenes_1639          | 0.931  |
| Listeria_monocytogenes_serotype_4b_str_81-0592_1196160   | Listeria_monocytogenes_1639          | 0.9321 |
| Listeria_monocytogenes_serotype_4b_str_81-0558_1196159   | Listeria_monocytogenes_1639          | 0.9328 |
| Listeria_monocytogenes_serotype_4b_str_10-0809_1196162   | Listeria_monocytogenes_1639          | 0.9324 |
| Listeria_monocytogenes_serotype_4b_str_02-6680_1196175   | Listeria_monocytogenes_1639          | 0.9538 |
| Listeria_monocytogenes_serotype_4b_str_02-6679_1196174   | Listeria_monocytogenes_1639          | 0.9538 |
| Listeria_monocytogenes_serotype_4b_str_02-1792_1196173   | Listeria_monocytogenes_1639          | 0.9324 |
| Listeria_monocytogenes_serotype_4b_str_02-1289_1196172   | Listeria_monocytogenes_1639          | 0.9324 |
| Listeria_monocytogenes_serotype_4b_str_02-1103_1196171   | Listeria_monocytogenes_1639          | 0.9324 |
| Listeria_monocytogenes_serotype_3c_str_10-5027_1196195   | Listeria_monocytogenes_1639          | 0.9539 |
| Listeria_monocytogenes_serotype_1_2c_str_10-5026_1196194 | Listeria_monocytogenes_1639          | 0.9547 |
| Listeria_monocytogenes_serotype_1_2c_str_10-5025_1196193 | Listeria_monocytogenes_1639          | 0.9547 |
| Listeria_monocytogenes_serotype_1_2b_str_10-0811_1196164 | Listeria_monocytogenes_1639          | 0.9355 |
| Listeria_monocytogenes_serotype_1_2b_str_10-0810_1196163 | Listeria_monocytogenes_1639          | 0.9355 |
| Listeria_monocytogenes_serotype_1_2a_str_99-6370_1196179 | Listeria_monocytogenes_1639          | 0.9436 |
| Listeria_monocytogenes_serotype_1_2a_str_98-2035_1196178 | Listeria_monocytogenes_1639          | 0.9436 |
| Listeria_monocytogenes_serotype_1_2a_str_95-0093_1196177 | Listeria_monocytogenes_1639          | 0.9497 |
| Listeria_monocytogenes_serotype_1_2a_str_88-0478_1196176 | Listeria_monocytogenes_1639          | 0.9485 |
| Listeria_monocytogenes_serotype_1_2a_str_10-5024_1196192 | Listeria_monocytogenes_1639          | 0.9497 |
| Listeria_monocytogenes_serotype_1_2a_str_10-4758_1196168 | Listeria_monocytogenes_1639          | 0.9634 |
| Listeria_monocytogenes_serotype_1_2a_str_10-4754_1196167 | Listeria_monocytogenes_1639          | 0.9638 |
| Listeria_monocytogenes_serotype_1_2a_str_10-1321_1196191 | Listeria_monocytogenes_1639          | 0.9497 |
| Listeria_monocytogenes_serotype_1_2a_str_10-1047_1196190 | Listeria_monocytogenes_1639          | 0.9504 |
| Listeria_monocytogenes_serotype_1_2a_str_10-1046_1196189 | Listeria_monocytogenes_1639          | 0.9504 |
| Listeria_monocytogenes_serotype_1_2a_str_10-0934_1196170 | Listeria_monocytogenes_1639          | 0.986  |
| Listeria_monocytogenes_serotype_1_2a_str_10-0933_1196169 | Listeria_monocytogenes_1639          | 0.986  |
| Listeria_monocytogenes_serotype_1_2a_str_10-0815_1196188 | Listeria_monocytogenes_1639          | 0.945  |
| Listeria_monocytogenes_serotype_1_2a_str_10-0814_1196187 | Listeria_monocytogenes_1639          | 0.9497 |
| Listeria_monocytogenes_serotype_1_2a_str_10-0813_1196166 | Listeria_monocytogenes_1639          | 0.9774 |
| Listeria_monocytogenes_serotype_1_2a_str_10-0812_1196165 | Listeria_monocytogenes_1639          | 0.9774 |
| Listeria_monocytogenes_serotype_1_2a_str_08-7669_1196186 | Listeria_monocytogenes_1639          | 0.9598 |
| Listeria_monocytogenes_serotype_1_2a_str_08-7374_1196185 | Listeria_monocytogenes_1639          | 0.9497 |
| Listeria_monocytogenes_serotype_1_2a_str_08-6997_1196184 | Listeria_monocytogenes_1639          | 0.945  |

|                                                          |                             |        |
|----------------------------------------------------------|-----------------------------|--------|
| Listeria_monocytogenes_serotype_1_2a_str_08-6569_1196183 | Listeria_monocytogenes_1639 | 0.945  |
| Listeria_monocytogenes_serotype_1_2a_str_08-6056_1196182 | Listeria_monocytogenes_1639 | 0.945  |
| Listeria_monocytogenes_serotype_1_2a_str_04-5457_1196181 | Listeria_monocytogenes_1639 | 0.9497 |
| Listeria_monocytogenes_serotype_1_2a_str_02-5993_1196180 | Listeria_monocytogenes_1639 | 0.9497 |
| Listeria_monocytogenes_R479a_1437838                     | Listeria_monocytogenes_1639 | 0.9486 |
| Listeria_monocytogenes_N53-1_1234142                     | Listeria_monocytogenes_1639 | 0.9183 |
| Listeria_monocytogenes_M7_1030009                        | Listeria_monocytogenes_1639 | 0.9086 |
| Listeria_monocytogenes_LO28_393132                       | Listeria_monocytogenes_1639 | 0.9532 |
| Listeria_monocytogenes_L99_563174                        | Listeria_monocytogenes_1639 | 0.9089 |
| Listeria_monocytogenes_L312_882094                       | Listeria_monocytogenes_1639 | 0.9549 |
| Listeria_monocytogenes_J1816_930781                      | Listeria_monocytogenes_1639 | 0.9342 |
| Listeria_monocytogenes_J1-220_930782                     | Listeria_monocytogenes_1639 | 0.9284 |
| Listeria_monocytogenes_J0161_393130                      | Listeria_monocytogenes_1639 | 0.9536 |
| Listeria_monocytogenes_HCC23_552536                      | Listeria_monocytogenes_1639 | 0.9086 |
| Listeria_monocytogenes_FSL_R2-561_393126                 | Listeria_monocytogenes_1639 | 0.9532 |
| Listeria_monocytogenes_FSL_J1-208_393119                 | Listeria_monocytogenes_1639 | 0.919  |
| Listeria_monocytogenes_FSL_J1-175_393118                 | Listeria_monocytogenes_1639 | 0.9495 |
| Listeria_monocytogenes_Finland_1998_393127               | Listeria_monocytogenes_1639 | 0.9739 |
| Listeria_monocytogenes_EGD-e_169963_v1                   | Listeria_monocytogenes_1639 | 0.9631 |
| Listeria_monocytogenes_EGD-e_169963                      | Listeria_monocytogenes_1639 | 0.9631 |
| Listeria_monocytogenes_EGD_1334565                       | Listeria_monocytogenes_1639 | 0.9861 |
| Listeria_monocytogenes_CFSAN002349_1299895               | Listeria_monocytogenes_1639 | 0.9535 |
| Listeria_monocytogenes_ATCC_19117_882095_v1              | Listeria_monocytogenes_1639 | 0.9485 |
| Listeria_monocytogenes_ATCC_19117_882095                 | Listeria_monocytogenes_1639 | 0.9482 |
| Listeria_monocytogenes_6179_1288295                      | Listeria_monocytogenes_1639 | 0.9393 |
| Listeria_monocytogenes_1639_v9                           | Listeria_monocytogenes_1639 | 0.9203 |
| Listeria_monocytogenes_1639_v99                          | Listeria_monocytogenes_1639 | 0.9347 |
| Listeria_monocytogenes_1639_v98                          | Listeria_monocytogenes_1639 | 0.9509 |
| Listeria_monocytogenes_1639_v97                          | Listeria_monocytogenes_1639 | 0.9418 |
| Listeria_monocytogenes_1639_v96                          | Listeria_monocytogenes_1639 | 0.9336 |
| Listeria_monocytogenes_1639_v95                          | Listeria_monocytogenes_1639 | 0.9336 |
| Listeria_monocytogenes_1639_v94                          | Listeria_monocytogenes_1639 | 0.9343 |
| Listeria_monocytogenes_1639_v93                          | Listeria_monocytogenes_1639 | 0.9493 |
| Listeria_monocytogenes_1639_v92                          | Listeria_monocytogenes_1639 | 0.9343 |
| Listeria_monocytogenes_1639_v91                          | Listeria_monocytogenes_1639 | 0.9296 |
| Listeria_monocytogenes_1639_v90                          | Listeria_monocytogenes_1639 | 0.9509 |
| Listeria_monocytogenes_1639_v8                           | Listeria_monocytogenes_1639 | 0.938  |
| Listeria_monocytogenes_1639_v89                          | Listeria_monocytogenes_1639 | 0.945  |
| Listeria_monocytogenes_1639_v88                          | Listeria_monocytogenes_1639 | 0.9653 |
| Listeria_monocytogenes_1639_v87                          | Listeria_monocytogenes_1639 | 0.9719 |
| Listeria_monocytogenes_1639_v86                          | Listeria_monocytogenes_1639 | 0.9719 |
| Listeria_monocytogenes_1639_v85                          | Listeria_monocytogenes_1639 | 0.9303 |
| Listeria_monocytogenes_1639_v84                          | Listeria_monocytogenes_1639 | 0.9575 |
| Listeria_monocytogenes_1639_v83                          | Listeria_monocytogenes_1639 | 0.9373 |
| Listeria_monocytogenes_1639_v82                          | Listeria_monocytogenes_1639 | 0.937  |
| Listeria_monocytogenes_1639_v81                          | Listeria_monocytogenes_1639 | 0.953  |
| Listeria_monocytogenes_1639_v80                          | Listeria_monocytogenes_1639 | 0.9399 |
| Listeria_monocytogenes_1639_v7                           | Listeria_monocytogenes_1639 | 0.938  |
| Listeria_monocytogenes_1639_v79                          | Listeria_monocytogenes_1639 | 0.9512 |
| Listeria_monocytogenes_1639_v78                          | Listeria_monocytogenes_1639 | 0.9523 |
| Listeria_monocytogenes_1639_v77                          | Listeria_monocytogenes_1639 | 0.9578 |
| Listeria_monocytogenes_1639_v76                          | Listeria_monocytogenes_1639 | 0.9469 |
| Listeria_monocytogenes_1639_v75                          | Listeria_monocytogenes_1639 | 0.9089 |
| Listeria_monocytogenes_1639_v74                          | Listeria_monocytogenes_1639 | 0.9715 |
| Listeria_monocytogenes_1639_v73                          | Listeria_monocytogenes_1639 | 0.9482 |
| Listeria_monocytogenes_1639_v72                          | Listeria_monocytogenes_1639 | 0.9357 |
| Listeria_monocytogenes_1639_v71                          | Listeria_monocytogenes_1639 | 0.9392 |
| Listeria_monocytogenes_1639_v70                          | Listeria_monocytogenes_1639 | 0.9507 |
| Listeria_monocytogenes_1639_v6                           | Listeria_monocytogenes_1639 | 0.9376 |
| Listeria_monocytogenes_1639_v69                          | Listeria_monocytogenes_1639 | 0.9321 |
| Listeria_monocytogenes_1639_v68                          | Listeria_monocytogenes_1639 | 0.9568 |
| Listeria_monocytogenes_1639_v67                          | Listeria_monocytogenes_1639 | 0.9412 |
| Listeria_monocytogenes_1639_v66                          | Listeria_monocytogenes_1639 | 0.962  |
| Listeria_monocytogenes_1639_v65                          | Listeria_monocytogenes_1639 | 0.9522 |
| Listeria_monocytogenes_1639_v64                          | Listeria_monocytogenes_1639 | 0.9542 |
| Listeria_monocytogenes_1639_v63                          | Listeria_monocytogenes_1639 | 0.9366 |
| Listeria_monocytogenes_1639_v62                          | Listeria_monocytogenes_1639 | 0.9487 |
| Listeria_monocytogenes_1639_v61                          | Listeria_monocytogenes_1639 | 0.9522 |
| Listeria_monocytogenes_1639_v60                          | Listeria_monocytogenes_1639 | 0.9561 |
| Listeria_monocytogenes_1639_v5                           | Listeria_monocytogenes_1639 | 0.9007 |
| Listeria_monocytogenes_1639_v59                          | Listeria_monocytogenes_1639 | 0.9377 |
| Listeria_monocytogenes_1639_v58                          | Listeria_monocytogenes_1639 | 0.9377 |
| Listeria_monocytogenes_1639_v57                          | Listeria_monocytogenes_1639 | 0.9301 |
| Listeria_monocytogenes_1639_v56                          | Listeria_monocytogenes_1639 | 0.938  |
| Listeria_monocytogenes_1639_v55                          | Listeria_monocytogenes_1639 | 0.9266 |
| Listeria_monocytogenes_1639_v54                          | Listeria_monocytogenes_1639 | 0.9334 |
| Listeria_monocytogenes_1639_v53                          | Listeria_monocytogenes_1639 | 0.9553 |
| Listeria_monocytogenes_1639_v52                          | Listeria_monocytogenes_1639 | 0.9348 |
| Listeria_monocytogenes_1639_v51                          | Listeria_monocytogenes_1639 | 0.9323 |
| Listeria_monocytogenes_1639_v50                          | Listeria_monocytogenes_1639 | 0.9482 |
| Listeria_monocytogenes_1639_v4                           | Listeria_monocytogenes_1639 | 0.914  |
| Listeria_monocytogenes_1639_v49                          | Listeria_monocytogenes_1639 | 0.9317 |
| Listeria_monocytogenes_1639_v48                          | Listeria_monocytogenes_1639 | 0.9489 |
| Listeria_monocytogenes_1639_v47                          | Listeria_monocytogenes_1639 | 0.9493 |
| Listeria_monocytogenes_1639_v46                          | Listeria_monocytogenes_1639 | 0.9561 |
| Listeria_monocytogenes_1639_v45                          | Listeria_monocytogenes_1639 | 0.9397 |
| Listeria_monocytogenes_1639_v44                          | Listeria_monocytogenes_1639 | 0.9497 |
| Listeria_monocytogenes_1639_v43                          | Listeria_monocytogenes_1639 | 0.9497 |
| Listeria_monocytogenes_1639_v42                          | Listeria_monocytogenes_1639 | 0.9413 |
| Listeria_monocytogenes_1639_v41                          | Listeria_monocytogenes_1639 | 0.9316 |
| Listeria_monocytogenes_1639_v40                          | Listeria_monocytogenes_1639 | 0.9536 |

[illegible]

Listeria\_monocytogenes\_1639\_v137  
Listeria\_monocytogenes\_1639\_v136  
Listeria\_monocytogenes\_1639\_v135  
Listeria\_monocytogenes\_1639\_v134  
Listeria\_monocytogenes\_1639\_v133  
Listeria\_monocytogenes\_1639\_v132  
Listeria\_monocytogenes\_1639\_v131  
Listeria\_monocytogenes\_1639\_v130  
Listeria\_monocytogenes\_1639\_v12  
Listeria\_monocytogenes\_1639\_v129  
Listeria\_monocytogenes\_1639\_v128  
Listeria\_monocytogenes\_1639\_v127  
Listeria\_monocytogenes\_1639\_v126  
Listeria\_monocytogenes\_1639\_v125  
Listeria\_monocytogenes\_1639\_v124  
Listeria\_monocytogenes\_1639\_v123  
Listeria\_monocytogenes\_1639\_v122  
Listeria\_monocytogenes\_1639\_v121  
Listeria\_monocytogenes\_1639\_v120  
Listeria\_monocytogenes\_1639\_v11  
Listeria\_monocytogenes\_1639\_v119  
Listeria\_monocytogenes\_1639\_v118  
Listeria\_monocytogenes\_1639\_v117  
Listeria\_monocytogenes\_1639\_v116  
Listeria\_monocytogenes\_1639\_v115  
Listeria\_monocytogenes\_1639\_v114  
Listeria\_monocytogenes\_1639\_v113  
Listeria\_monocytogenes\_1639\_v112  
Listeria\_monocytogenes\_1639\_v111  
Listeria\_monocytogenes\_1639\_v110  
Listeria\_monocytogenes\_1639\_v10  
Listeria\_monocytogenes\_1639\_v109  
Listeria\_monocytogenes\_1639\_v108  
Listeria\_monocytogenes\_1639\_v107  
Listeria\_monocytogenes\_1639\_v106  
Listeria\_monocytogenes\_1639\_v105  
Listeria\_monocytogenes\_1639\_v104  
Listeria\_monocytogenes\_1639\_v103  
Listeria\_monocytogenes\_1639\_v102  
Listeria\_monocytogenes\_1639\_v101  
Listeria\_monocytogenes\_1639\_v100  
Listeria\_monocytogenes\_1639  
Listeria\_welshimeri\_1643  
Listeria\_welshimeri\_serovar\_6b\_str\_SLCC5334\_386043  
Listeria\_seeligeri\_serovar\_1\_2b\_str\_SLCC3954\_683837  
Listeria\_seeligeri\_FSL\_S4-171\_702452  
Listeria\_seeligeri\_FSL\_N1-067\_702453  
Listeria\_seeligeri\_1640\_v1  
Listeria\_seeligeri\_1640  
Listeria\_monocytogenes\_WSLC1042\_1457188  
Listeria\_monocytogenes\_WSLC1001\_1457187  
Listeria\_monocytogenes\_SLCC7179\_879090  
Listeria\_monocytogenes\_SLCC5850\_882096  
Listeria\_monocytogenes\_SLCC2755\_932919  
Listeria\_monocytogenes\_SLCC2540\_879089  
Listeria\_monocytogenes\_SLCC2479\_882020  
Listeria\_monocytogenes\_SLCC2378\_879088  
Listeria\_monocytogenes\_SLCC2376\_882097  
Listeria\_monocytogenes\_SLCC2372\_932920  
Listeria\_monocytogenes\_serotype\_4b\_str\_LL195\_1230340  
Listeria\_monocytogenes\_serotype\_4b\_str\_LIS0087\_1134669  
Listeria\_monocytogenes\_serotype\_4b\_str\_F2365\_265669  
Listeria\_monocytogenes\_serotype\_4b\_str\_CLIP\_80459\_568819  
Listeria\_monocytogenes\_serotype\_4b\_str\_81-0861\_1196161  
Listeria\_monocytogenes\_serotype\_4b\_str\_81-0592\_1196160  
Listeria\_monocytogenes\_serotype\_4b\_str\_81-0558\_1196159  
Listeria\_monocytogenes\_serotype\_4b\_str\_10-0809\_1196162  
Listeria\_monocytogenes\_serotype\_4b\_str\_02-6680\_1196175  
Listeria\_monocytogenes\_serotype\_4b\_str\_02-6679\_1196174  
Listeria\_monocytogenes\_serotype\_4b\_str\_02-1792\_1196173  
Listeria\_monocytogenes\_serotype\_4b\_str\_02-1289\_1196172  
Listeria\_monocytogenes\_serotype\_4b\_str\_02-1103\_1196171  
Listeria\_monocytogenes\_serotype\_3c\_str\_10-5027\_1196195  
Listeria\_monocytogenes\_serotype\_1\_2c\_str\_10-5026\_1196194  
Listeria\_monocytogenes\_serotype\_1\_2c\_str\_10-5025\_1196193  
Listeria\_monocytogenes\_serotype\_1\_2b\_str\_10-0811\_1196164  
Listeria\_monocytogenes\_serotype\_1\_2b\_str\_10-0810\_1196163  
Listeria\_monocytogenes\_serotype\_1\_2a\_str\_99-6370\_1196179  
Listeria\_monocytogenes\_serotype\_1\_2a\_str\_98-2035\_1196178  
Listeria\_monocytogenes\_serotype\_1\_2a\_str\_95-0093\_1196177  
Listeria\_monocytogenes\_serotype\_1\_2a\_str\_88-0478\_1196176  
Listeria\_monocytogenes\_serotype\_1\_2a\_str\_10-5024\_1196192  
Listeria\_monocytogenes\_serotype\_1\_2a\_str\_10-4758\_1196168  
Listeria\_monocytogenes\_serotype\_1\_2a\_str\_10-4754\_1196167  
Listeria\_monocytogenes\_serotype\_1\_2a\_str\_10-1321\_1196191  
Listeria\_monocytogenes\_serotype\_1\_2a\_str\_10-1047\_1196190  
Listeria\_monocytogenes\_serotype\_1\_2a\_str\_10-1046\_1196189  
Listeria\_monocytogenes\_serotype\_1\_2a\_str\_10-0934\_1196170  
Listeria\_monocytogenes\_serotype\_1\_2a\_str\_10-0933\_1196169  
Listeria\_monocytogenes\_serotype\_1\_2a\_str\_10-0815\_1196188  
Listeria\_monocytogenes\_serotype\_1\_2a\_str\_10-0814\_1196187

Listeria\_monocytogenes\_1639 0.9573  
Listeria\_monocytogenes\_1639 0.9631  
Listeria\_monocytogenes\_1639 0.9211  
Listeria\_monocytogenes\_1639 0.942  
Listeria\_monocytogenes\_1639 0.9664  
Listeria\_monocytogenes\_1639 0.9211  
Listeria\_monocytogenes\_1639 0.9421  
Listeria\_monocytogenes\_1639 0.9543  
Listeria\_monocytogenes\_1639 0.9334  
Listeria\_monocytogenes\_1639 0.9584  
Listeria\_monocytogenes\_1639 0.9562  
Listeria\_monocytogenes\_1639 0.9643  
Listeria\_monocytogenes\_1639 0.957  
Listeria\_monocytogenes\_1639 0.9641  
Listeria\_monocytogenes\_1639 0.9391  
Listeria\_monocytogenes\_1639 0.9535  
Listeria\_monocytogenes\_1639 0.9531  
Listeria\_monocytogenes\_1639 0.9531  
Listeria\_monocytogenes\_1639 0.9531  
Listeria\_monocytogenes\_1639 0.9355  
Listeria\_monocytogenes\_1639 0.9531  
Listeria\_monocytogenes\_1639 0.9531  
Listeria\_monocytogenes\_1639 0.9623  
Listeria\_monocytogenes\_1639 0.9426  
Listeria\_monocytogenes\_1639 0.9422  
Listeria\_monocytogenes\_1639 0.9782  
Listeria\_monocytogenes\_1639 0.9518  
Listeria\_monocytogenes\_1639 0.9382  
Listeria\_monocytogenes\_1639 0.9486  
Listeria\_monocytogenes\_1639 0.9778  
Listeria\_monocytogenes\_1639 0.9192  
Listeria\_monocytogenes\_1639 0.9778  
Listeria\_monocytogenes\_1639 0.9422  
Listeria\_monocytogenes\_1639 0.9471  
Listeria\_monocytogenes\_1639 0.9474  
Listeria\_monocytogenes\_1639 0.9474  
Listeria\_monocytogenes\_1639 0.9474  
Listeria\_monocytogenes\_1639 0.9478  
Listeria\_monocytogenes\_1639 0.9606  
Listeria\_monocytogenes\_1639 0.9482  
Listeria\_monocytogenes\_1639 0.9475  
Listeria\_monocytogenes\_1639 0.0676  
Listeria\_monocytogenes\_1639\_v100 0.8632  
Listeria\_monocytogenes\_1639\_v100 0.8629  
Listeria\_monocytogenes\_1639\_v100 0.8682  
Listeria\_monocytogenes\_1639\_v100 0.8093  
Listeria\_monocytogenes\_1639\_v100 0.8369  
Listeria\_monocytogenes\_1639\_v100 0.8668  
Listeria\_monocytogenes\_1639\_v100 0.8633  
Listeria\_monocytogenes\_1639\_v100 0.9147  
Listeria\_monocytogenes\_1639\_v100 0.9488  
Listeria\_monocytogenes\_1639\_v100 0.9435  
Listeria\_monocytogenes\_1639\_v100 0.9486  
Listeria\_monocytogenes\_1639\_v100 0.922  
Listeria\_monocytogenes\_1639\_v100 0.9321  
Listeria\_monocytogenes\_1639\_v100 0.9513  
Listeria\_monocytogenes\_1639\_v100 0.9157  
Listeria\_monocytogenes\_1639\_v100 0.9203  
Listeria\_monocytogenes\_1639\_v100 0.951  
Listeria\_monocytogenes\_1639\_v100 0.9208  
Listeria\_monocytogenes\_1639\_v100 0.9285  
Listeria\_monocytogenes\_1639\_v100 0.9208  
Listeria\_monocytogenes\_1639\_v100 0.9275  
Listeria\_monocytogenes\_1639\_v100 0.9107  
Listeria\_monocytogenes\_1639\_v100 0.9117  
Listeria\_monocytogenes\_1639\_v100 0.9121  
Listeria\_monocytogenes\_1639\_v100 0.9117  
Listeria\_monocytogenes\_1639\_v100 0.9242  
Listeria\_monocytogenes\_1639\_v100 0.9242  
Listeria\_monocytogenes\_1639\_v100 0.9125  
Listeria\_monocytogenes\_1639\_v100 0.9125  
Listeria\_monocytogenes\_1639\_v100 0.9125  
Listeria\_monocytogenes\_1639\_v100 0.9558  
Listeria\_monocytogenes\_1639\_v100 0.9569  
Listeria\_monocytogenes\_1639\_v100 0.9569  
Listeria\_monocytogenes\_1639\_v100 0.9325  
Listeria\_monocytogenes\_1639\_v100 0.9325  
Listeria\_monocytogenes\_1639\_v100 0.9614  
Listeria\_monocytogenes\_1639\_v100 0.9614  
Listeria\_monocytogenes\_1639\_v100 0.9674  
Listeria\_monocytogenes\_1639\_v100 0.967  
Listeria\_monocytogenes\_1639\_v100 0.967  
Listeria\_monocytogenes\_1639\_v100 0.9472  
Listeria\_monocytogenes\_1639\_v100 0.9475  
Listeria\_monocytogenes\_1639\_v100 0.967  
Listeria\_monocytogenes\_1639\_v100 0.97  
Listeria\_monocytogenes\_1639\_v100 0.97  
Listeria\_monocytogenes\_1639\_v100 0.9476  
Listeria\_monocytogenes\_1639\_v100 0.9476  
Listeria\_monocytogenes\_1639\_v100 0.9625  
Listeria\_monocytogenes\_1639\_v100 0.967

|                                                          |                                  |        |
|----------------------------------------------------------|----------------------------------|--------|
| Listeria_monocytogenes_serotype_1_2a_str_10-0813_1196166 | Listeria_monocytogenes_1639_v100 | 0.9515 |
| Listeria_monocytogenes_serotype_1_2a_str_10-0812_1196165 | Listeria_monocytogenes_1639_v100 | 0.9515 |
| Listeria_monocytogenes_serotype_1_2a_str_08-7669_1196186 | Listeria_monocytogenes_1639_v100 | 0.9612 |
| Listeria_monocytogenes_serotype_1_2a_str_08-7374_1196185 | Listeria_monocytogenes_1639_v100 | 0.967  |
| Listeria_monocytogenes_serotype_1_2a_str_08-6997_1196184 | Listeria_monocytogenes_1639_v100 | 0.9625 |
| Listeria_monocytogenes_serotype_1_2a_str_08-6569_1196183 | Listeria_monocytogenes_1639_v100 | 0.9625 |
| Listeria_monocytogenes_serotype_1_2a_str_08-6056_1196182 | Listeria_monocytogenes_1639_v100 | 0.9625 |
| Listeria_monocytogenes_serotype_1_2a_str_04-5457_1196181 | Listeria_monocytogenes_1639_v100 | 0.967  |
| Listeria_monocytogenes_serotype_1_2a_str_02-5993_1196180 | Listeria_monocytogenes_1639_v100 | 0.967  |
| Listeria_monocytogenes_R479a_1437838                     | Listeria_monocytogenes_1639_v100 | 0.9971 |
| Listeria_monocytogenes_N53-1_1234142                     | Listeria_monocytogenes_1639_v100 | 0.8907 |
| Listeria_monocytogenes_M7_1030009                        | Listeria_monocytogenes_1639_v100 | 0.8954 |
| Listeria_monocytogenes_LO28_393132                       | Listeria_monocytogenes_1639_v100 | 0.9466 |
| Listeria_monocytogenes_L99_563174                        | Listeria_monocytogenes_1639_v100 | 0.8958 |
| Listeria_monocytogenes_L312_882094                       | Listeria_monocytogenes_1639_v100 | 0.9275 |
| Listeria_monocytogenes_J1816_930781                      | Listeria_monocytogenes_1639_v100 | 0.9169 |
| Listeria_monocytogenes_J1-220_930782                     | Listeria_monocytogenes_1639_v100 | 0.9157 |
| Listeria_monocytogenes_J0161_393130                      | Listeria_monocytogenes_1639_v100 | 0.9385 |
| Listeria_monocytogenes_HCC23_552536                      | Listeria_monocytogenes_1639_v100 | 0.8951 |
| Listeria_monocytogenes_FSL_R2-561_393126                 | Listeria_monocytogenes_1639_v100 | 0.9525 |
| Listeria_monocytogenes_FSL_J1-208_393119                 | Listeria_monocytogenes_1639_v100 | 0.8874 |
| Listeria_monocytogenes_FSL_J1-175_393118                 | Listeria_monocytogenes_1639_v100 | 0.9299 |
| Listeria_monocytogenes_Finland_1998_393127               | Listeria_monocytogenes_1639_v100 | 0.9479 |
| Listeria_monocytogenes_EGD-e_169963_v1                   | Listeria_monocytogenes_1639_v100 | 0.9387 |
| Listeria_monocytogenes_EGD-e_169963                      | Listeria_monocytogenes_1639_v100 | 0.9387 |
| Listeria_monocytogenes_EGD_1334565                       | Listeria_monocytogenes_1639_v100 | 0.9493 |
| Listeria_monocytogenes_CFSAN002349_1299895               | Listeria_monocytogenes_1639_v100 | 0.9251 |
| Listeria_monocytogenes_ATCC_19117_882095_v1              | Listeria_monocytogenes_1639_v100 | 0.9196 |
| Listeria_monocytogenes_ATCC_19117_882095                 | Listeria_monocytogenes_1639_v100 | 0.9192 |
| Listeria_monocytogenes_6179_1288295                      | Listeria_monocytogenes_1639_v100 | 0.9506 |
| Listeria_monocytogenes_1639_v9                           | Listeria_monocytogenes_1639_v100 | 0.9178 |
| Listeria_monocytogenes_1639_v99                          | Listeria_monocytogenes_1639_v100 | 0.9239 |
| Listeria_monocytogenes_1639_v98                          | Listeria_monocytogenes_1639_v100 | 0.9355 |
| Listeria_monocytogenes_1639_v97                          | Listeria_monocytogenes_1639_v100 | 0.9214 |
| Listeria_monocytogenes_1639_v96                          | Listeria_monocytogenes_1639_v100 | 0.9236 |
| Listeria_monocytogenes_1639_v95                          | Listeria_monocytogenes_1639_v100 | 0.9236 |
| Listeria_monocytogenes_1639_v94                          | Listeria_monocytogenes_1639_v100 | 0.9243 |
| Listeria_monocytogenes_1639_v93                          | Listeria_monocytogenes_1639_v100 | 0.9483 |
| Listeria_monocytogenes_1639_v92                          | Listeria_monocytogenes_1639_v100 | 0.9236 |
| Listeria_monocytogenes_1639_v91                          | Listeria_monocytogenes_1639_v100 | 0.9168 |
| Listeria_monocytogenes_1639_v90                          | Listeria_monocytogenes_1639_v100 | 0.9355 |
| Listeria_monocytogenes_1639_v8                           | Listeria_monocytogenes_1639_v100 | 0.9747 |
| Listeria_monocytogenes_1639_v89                          | Listeria_monocytogenes_1639_v100 | 0.9233 |
| Listeria_monocytogenes_1639_v88                          | Listeria_monocytogenes_1639_v100 | 0.9523 |
| Listeria_monocytogenes_1639_v87                          | Listeria_monocytogenes_1639_v100 | 0.9459 |
| Listeria_monocytogenes_1639_v86                          | Listeria_monocytogenes_1639_v100 | 0.9455 |
| Listeria_monocytogenes_1639_v85                          | Listeria_monocytogenes_1639_v100 | 0.9104 |
| Listeria_monocytogenes_1639_v84                          | Listeria_monocytogenes_1639_v100 | 0.953  |
| Listeria_monocytogenes_1639_v83                          | Listeria_monocytogenes_1639_v100 | 0.9135 |
| Listeria_monocytogenes_1639_v82                          | Listeria_monocytogenes_1639_v100 | 0.9132 |
| Listeria_monocytogenes_1639_v81                          | Listeria_monocytogenes_1639_v100 | 0.9593 |
| Listeria_monocytogenes_1639_v80                          | Listeria_monocytogenes_1639_v100 | 0.9322 |
| Listeria_monocytogenes_1639_v7                           | Listeria_monocytogenes_1639_v100 | 0.9747 |
| Listeria_monocytogenes_1639_v79                          | Listeria_monocytogenes_1639_v100 | 0.9554 |
| Listeria_monocytogenes_1639_v78                          | Listeria_monocytogenes_1639_v100 | 0.959  |
| Listeria_monocytogenes_1639_v77                          | Listeria_monocytogenes_1639_v100 | 0.944  |
| Listeria_monocytogenes_1639_v76                          | Listeria_monocytogenes_1639_v100 | 0.941  |
| Listeria_monocytogenes_1639_v75                          | Listeria_monocytogenes_1639_v100 | 0.8958 |
| Listeria_monocytogenes_1639_v74                          | Listeria_monocytogenes_1639_v100 | 0.9418 |
| Listeria_monocytogenes_1639_v73                          | Listeria_monocytogenes_1639_v100 | 0.9509 |
| Listeria_monocytogenes_1639_v72                          | Listeria_monocytogenes_1639_v100 | 0.9115 |
| Listeria_monocytogenes_1639_v71                          | Listeria_monocytogenes_1639_v100 | 0.9408 |
| Listeria_monocytogenes_1639_v70                          | Listeria_monocytogenes_1639_v100 | 0.9519 |
| Listeria_monocytogenes_1639_v6                           | Listeria_monocytogenes_1639_v100 | 0.9743 |
| Listeria_monocytogenes_1639_v69                          | Listeria_monocytogenes_1639_v100 | 0.9117 |
| Listeria_monocytogenes_1639_v68                          | Listeria_monocytogenes_1639_v100 | 0.9353 |
| Listeria_monocytogenes_1639_v67                          | Listeria_monocytogenes_1639_v100 | 0.9309 |
| Listeria_monocytogenes_1639_v66                          | Listeria_monocytogenes_1639_v100 | 0.9472 |
| Listeria_monocytogenes_1639_v65                          | Listeria_monocytogenes_1639_v100 | 0.9644 |
| Listeria_monocytogenes_1639_v64                          | Listeria_monocytogenes_1639_v100 | 0.9432 |
| Listeria_monocytogenes_1639_v63                          | Listeria_monocytogenes_1639_v100 | 0.9416 |
| Listeria_monocytogenes_1639_v62                          | Listeria_monocytogenes_1639_v100 | 0.9522 |
| Listeria_monocytogenes_1639_v61                          | Listeria_monocytogenes_1639_v100 | 0.9677 |
| Listeria_monocytogenes_1639_v60                          | Listeria_monocytogenes_1639_v100 | 0.9427 |
| Listeria_monocytogenes_1639_v5                           | Listeria_monocytogenes_1639_v100 | 0.9006 |
| Listeria_monocytogenes_1639_v59                          | Listeria_monocytogenes_1639_v100 | 0.9175 |
| Listeria_monocytogenes_1639_v58                          | Listeria_monocytogenes_1639_v100 | 0.9123 |
| Listeria_monocytogenes_1639_v57                          | Listeria_monocytogenes_1639_v100 | 0.914  |
| Listeria_monocytogenes_1639_v56                          | Listeria_monocytogenes_1639_v100 | 0.9197 |
| Listeria_monocytogenes_1639_v55                          | Listeria_monocytogenes_1639_v100 | 0.9176 |
| Listeria_monocytogenes_1639_v54                          | Listeria_monocytogenes_1639_v100 | 0.9125 |
| Listeria_monocytogenes_1639_v53                          | Listeria_monocytogenes_1639_v100 | 0.932  |
| Listeria_monocytogenes_1639_v52                          | Listeria_monocytogenes_1639_v100 | 0.917  |
| Listeria_monocytogenes_1639_v51                          | Listeria_monocytogenes_1639_v100 | 0.9132 |
| Listeria_monocytogenes_1639_v50                          | Listeria_monocytogenes_1639_v100 | 0.9656 |
| Listeria_monocytogenes_1639_v4                           | Listeria_monocytogenes_1639_v100 | 0.9064 |
| Listeria_monocytogenes_1639_v49                          | Listeria_monocytogenes_1639_v100 | 0.9096 |
| Listeria_monocytogenes_1639_v48                          | Listeria_monocytogenes_1639_v100 | 0.9498 |
| Listeria_monocytogenes_1639_v47                          | Listeria_monocytogenes_1639_v100 | 0.9656 |
| Listeria_monocytogenes_1639_v46                          | Listeria_monocytogenes_1639_v100 | 0.9379 |
| Listeria_monocytogenes_1639_v45                          | Listeria_monocytogenes_1639_v100 | 0.9746 |



[illegible]

|                                                          |                                  |        |
|----------------------------------------------------------|----------------------------------|--------|
| Listeria_monocytogenes_1639_v141                         | Listeria_monocytogenes_1639_v100 | 0.9342 |
| Listeria_monocytogenes_1639_v140                         | Listeria_monocytogenes_1639_v100 | 0.9278 |
| Listeria_monocytogenes_1639_v13                          | Listeria_monocytogenes_1639_v100 | 0.9227 |
| Listeria_monocytogenes_1639_v139                         | Listeria_monocytogenes_1639_v100 | 0.9219 |
| Listeria_monocytogenes_1639_v138                         | Listeria_monocytogenes_1639_v100 | 0.9301 |
| Listeria_monocytogenes_1639_v137                         | Listeria_monocytogenes_1639_v100 | 0.9298 |
| Listeria_monocytogenes_1639_v136                         | Listeria_monocytogenes_1639_v100 | 0.9479 |
| Listeria_monocytogenes_1639_v135                         | Listeria_monocytogenes_1639_v100 | 0.8955 |
| Listeria_monocytogenes_1639_v134                         | Listeria_monocytogenes_1639_v100 | 0.9155 |
| Listeria_monocytogenes_1639_v133                         | Listeria_monocytogenes_1639_v100 | 0.9481 |
| Listeria_monocytogenes_1639_v132                         | Listeria_monocytogenes_1639_v100 | 0.899  |
| Listeria_monocytogenes_1639_v131                         | Listeria_monocytogenes_1639_v100 | 0.9187 |
| Listeria_monocytogenes_1639_v130                         | Listeria_monocytogenes_1639_v100 | 0.9462 |
| Listeria_monocytogenes_1639_v12                          | Listeria_monocytogenes_1639_v100 | 0.943  |
| Listeria_monocytogenes_1639_v129                         | Listeria_monocytogenes_1639_v100 | 0.9301 |
| Listeria_monocytogenes_1639_v128                         | Listeria_monocytogenes_1639_v100 | 0.9311 |
| Listeria_monocytogenes_1639_v127                         | Listeria_monocytogenes_1639_v100 | 0.9383 |
| Listeria_monocytogenes_1639_v126                         | Listeria_monocytogenes_1639_v100 | 0.9322 |
| Listeria_monocytogenes_1639_v125                         | Listeria_monocytogenes_1639_v100 | 0.9421 |
| Listeria_monocytogenes_1639_v124                         | Listeria_monocytogenes_1639_v100 | 0.9034 |
| Listeria_monocytogenes_1639_v123                         | Listeria_monocytogenes_1639_v100 | 0.9251 |
| Listeria_monocytogenes_1639_v122                         | Listeria_monocytogenes_1639_v100 | 0.9247 |
| Listeria_monocytogenes_1639_v121                         | Listeria_monocytogenes_1639_v100 | 0.9247 |
| Listeria_monocytogenes_1639_v120                         | Listeria_monocytogenes_1639_v100 | 0.9247 |
| Listeria_monocytogenes_1639_v11                          | Listeria_monocytogenes_1639_v100 | 0.948  |
| Listeria_monocytogenes_1639_v119                         | Listeria_monocytogenes_1639_v100 | 0.9247 |
| Listeria_monocytogenes_1639_v118                         | Listeria_monocytogenes_1639_v100 | 0.9247 |
| Listeria_monocytogenes_1639_v117                         | Listeria_monocytogenes_1639_v100 | 0.9464 |
| Listeria_monocytogenes_1639_v116                         | Listeria_monocytogenes_1639_v100 | 0.9154 |
| Listeria_monocytogenes_1639_v115                         | Listeria_monocytogenes_1639_v100 | 0.9157 |
| Listeria_monocytogenes_1639_v114                         | Listeria_monocytogenes_1639_v100 | 0.9519 |
| Listeria_monocytogenes_1639_v113                         | Listeria_monocytogenes_1639_v100 | 0.9388 |
| Listeria_monocytogenes_1639_v112                         | Listeria_monocytogenes_1639_v100 | 0.9227 |
| Listeria_monocytogenes_1639_v111                         | Listeria_monocytogenes_1639_v100 | 0.928  |
| Listeria_monocytogenes_1639_v110                         | Listeria_monocytogenes_1639_v100 | 0.9445 |
| Listeria_monocytogenes_1639_v10                          | Listeria_monocytogenes_1639_v100 | 0.9193 |
| Listeria_monocytogenes_1639_v109                         | Listeria_monocytogenes_1639_v100 | 0.9563 |
| Listeria_monocytogenes_1639_v108                         | Listeria_monocytogenes_1639_v100 | 0.9189 |
| Listeria_monocytogenes_1639_v107                         | Listeria_monocytogenes_1639_v100 | 0.9182 |
| Listeria_monocytogenes_1639_v106                         | Listeria_monocytogenes_1639_v100 | 0.9185 |
| Listeria_monocytogenes_1639_v105                         | Listeria_monocytogenes_1639_v100 | 0.9185 |
| Listeria_monocytogenes_1639_v104                         | Listeria_monocytogenes_1639_v100 | 0.9185 |
| Listeria_monocytogenes_1639_v103                         | Listeria_monocytogenes_1639_v100 | 0.9189 |
| Listeria_monocytogenes_1639_v102                         | Listeria_monocytogenes_1639_v100 | 0.9819 |
| Listeria_monocytogenes_1639_v101                         | Listeria_monocytogenes_1639_v100 | 0.9941 |
| Listeria_monocytogenes_1639_v100                         | Listeria_monocytogenes_1639_v100 | 0.0731 |
| Listeria_welshimeri_1643                                 | Listeria_monocytogenes_1639_v101 | 0.8646 |
| Listeria_welshimeri_serovar_6b_str_SLCC5334_386043       | Listeria_monocytogenes_1639_v101 | 0.8639 |
| Listeria_seeligeri_serovar_1_2b_str_SLCC3954_683837      | Listeria_monocytogenes_1639_v101 | 0.8688 |
| Listeria_seeligeri_FSL_S4-171_702452                     | Listeria_monocytogenes_1639_v101 | 0.8106 |
| Listeria_seeligeri_FSL_N1-067_702453                     | Listeria_monocytogenes_1639_v101 | 0.8375 |
| Listeria_seeligeri_1640_v1                               | Listeria_monocytogenes_1639_v101 | 0.8674 |
| Listeria_seeligeri_1640                                  | Listeria_monocytogenes_1639_v101 | 0.8647 |
| Listeria_monocytogenes_WSLC1042_1457188                  | Listeria_monocytogenes_1639_v101 | 0.9154 |
| Listeria_monocytogenes_WSLC1001_1457187                  | Listeria_monocytogenes_1639_v101 | 0.9495 |
| Listeria_monocytogenes_SLCC7179_879090                   | Listeria_monocytogenes_1639_v101 | 0.9445 |
| Listeria_monocytogenes_SLCC5850_882096                   | Listeria_monocytogenes_1639_v101 | 0.9496 |
| Listeria_monocytogenes_SLCC2755_932919                   | Listeria_monocytogenes_1639_v101 | 0.923  |
| Listeria_monocytogenes_SLCC2540_879089                   | Listeria_monocytogenes_1639_v101 | 0.9339 |
| Listeria_monocytogenes_SLCC2479_882020                   | Listeria_monocytogenes_1639_v101 | 0.952  |
| Listeria_monocytogenes_SLCC2378_879088                   | Listeria_monocytogenes_1639_v101 | 0.9167 |
| Listeria_monocytogenes_SLCC2376_882097                   | Listeria_monocytogenes_1639_v101 | 0.921  |
| Listeria_monocytogenes_SLCC2372_932920                   | Listeria_monocytogenes_1639_v101 | 0.9517 |
| Listeria_monocytogenes_serotype_4b_str_LL195_1230340     | Listeria_monocytogenes_1639_v101 | 0.9218 |
| Listeria_monocytogenes_serotype_4b_str_LIS0087_1134669   | Listeria_monocytogenes_1639_v101 | 0.9289 |
| Listeria_monocytogenes_serotype_4b_str_F2365_265669      | Listeria_monocytogenes_1639_v101 | 0.9218 |
| Listeria_monocytogenes_serotype_4b_str_CLIP_80459_568819 | Listeria_monocytogenes_1639_v101 | 0.9285 |
| Listeria_monocytogenes_serotype_4b_str_81-0861_1196161   | Listeria_monocytogenes_1639_v101 | 0.9114 |
| Listeria_monocytogenes_serotype_4b_str_81-0592_1196160   | Listeria_monocytogenes_1639_v101 | 0.9124 |
| Listeria_monocytogenes_serotype_4b_str_81-0558_1196159   | Listeria_monocytogenes_1639_v101 | 0.9131 |
| Listeria_monocytogenes_serotype_4b_str_10-0809_1196162   | Listeria_monocytogenes_1639_v101 | 0.9124 |
| Listeria_monocytogenes_serotype_4b_str_02-6680_1196175   | Listeria_monocytogenes_1639_v101 | 0.9249 |
| Listeria_monocytogenes_serotype_4b_str_02-6679_1196174   | Listeria_monocytogenes_1639_v101 | 0.9249 |
| Listeria_monocytogenes_serotype_4b_str_02-1792_1196173   | Listeria_monocytogenes_1639_v101 | 0.9142 |
| Listeria_monocytogenes_serotype_4b_str_02-1289_1196172   | Listeria_monocytogenes_1639_v101 | 0.9142 |
| Listeria_monocytogenes_serotype_4b_str_02-1103_1196171   | Listeria_monocytogenes_1639_v101 | 0.9142 |
| Listeria_monocytogenes_serotype_3c_str_10-5027_1196195   | Listeria_monocytogenes_1639_v101 | 0.9565 |
| Listeria_monocytogenes_serotype_1_2c_str_10-5026_1196194 | Listeria_monocytogenes_1639_v101 | 0.9572 |
| Listeria_monocytogenes_serotype_1_2c_str_10-5025_1196193 | Listeria_monocytogenes_1639_v101 | 0.9572 |
| Listeria_monocytogenes_serotype_1_2b_str_10-0811_1196164 | Listeria_monocytogenes_1639_v101 | 0.9328 |
| Listeria_monocytogenes_serotype_1_2b_str_10-0810_1196163 | Listeria_monocytogenes_1639_v101 | 0.9328 |
| Listeria_monocytogenes_serotype_1_2a_str_99-6370_1196179 | Listeria_monocytogenes_1639_v101 | 0.9614 |
| Listeria_monocytogenes_serotype_1_2a_str_98-2035_1196178 | Listeria_monocytogenes_1639_v101 | 0.9614 |
| Listeria_monocytogenes_serotype_1_2a_str_95-0093_1196177 | Listeria_monocytogenes_1639_v101 | 0.9674 |
| Listeria_monocytogenes_serotype_1_2a_str_88-0478_1196176 | Listeria_monocytogenes_1639_v101 | 0.9674 |
| Listeria_monocytogenes_serotype_1_2a_str_10-5024_1196192 | Listeria_monocytogenes_1639_v101 | 0.9674 |
| Listeria_monocytogenes_serotype_1_2a_str_10-4758_1196168 | Listeria_monocytogenes_1639_v101 | 0.9475 |
| Listeria_monocytogenes_serotype_1_2a_str_10-4754_1196167 | Listeria_monocytogenes_1639_v101 | 0.9475 |
| Listeria_monocytogenes_serotype_1_2a_str_10-1321_1196191 | Listeria_monocytogenes_1639_v101 | 0.9674 |
| Listeria_monocytogenes_serotype_1_2a_str_10-1047_1196190 | Listeria_monocytogenes_1639_v101 | 0.967  |
| Listeria_monocytogenes_serotype_1_2a_str_10-1046_1196189 | Listeria_monocytogenes_1639_v101 | 0.967  |

|                                                          |                                  |        |
|----------------------------------------------------------|----------------------------------|--------|
| Listeria_monocytogenes_serotype_1_2a_str_10-0934_1196170 | Listeria_monocytogenes_1639_v101 | 0.9483 |
| Listeria_monocytogenes_serotype_1_2a_str_10-0933_1196169 | Listeria_monocytogenes_1639_v101 | 0.9483 |
| Listeria_monocytogenes_serotype_1_2a_str_10-0815_1196188 | Listeria_monocytogenes_1639_v101 | 0.9624 |
| Listeria_monocytogenes_serotype_1_2a_str_10-0814_1196187 | Listeria_monocytogenes_1639_v101 | 0.967  |
| Listeria_monocytogenes_serotype_1_2a_str_10-0813_1196166 | Listeria_monocytogenes_1639_v101 | 0.9493 |
| Listeria_monocytogenes_serotype_1_2a_str_10-0812_1196165 | Listeria_monocytogenes_1639_v101 | 0.9493 |
| Listeria_monocytogenes_serotype_1_2a_str_08-7669_1196186 | Listeria_monocytogenes_1639_v101 | 0.9619 |
| Listeria_monocytogenes_serotype_1_2a_str_08-7374_1196185 | Listeria_monocytogenes_1639_v101 | 0.9674 |
| Listeria_monocytogenes_serotype_1_2a_str_08-6997_1196184 | Listeria_monocytogenes_1639_v101 | 0.9624 |
| Listeria_monocytogenes_serotype_1_2a_str_08-6569_1196183 | Listeria_monocytogenes_1639_v101 | 0.9624 |
| Listeria_monocytogenes_serotype_1_2a_str_08-6056_1196182 | Listeria_monocytogenes_1639_v101 | 0.9624 |
| Listeria_monocytogenes_serotype_1_2a_str_04-5457_1196181 | Listeria_monocytogenes_1639_v101 | 0.9674 |
| Listeria_monocytogenes_serotype_1_2a_str_02-5993_1196180 | Listeria_monocytogenes_1639_v101 | 0.967  |
| Listeria_monocytogenes_R479a_1437838                     | Listeria_monocytogenes_1639_v101 | 0.9956 |
| Listeria_monocytogenes_N53-1_1234142                     | Listeria_monocytogenes_1639_v101 | 0.8906 |
| Listeria_monocytogenes_M7_1030009                        | Listeria_monocytogenes_1639_v101 | 0.8954 |
| Listeria_monocytogenes_LO28_393132                       | Listeria_monocytogenes_1639_v101 | 0.9477 |
| Listeria_monocytogenes_L99_563174                        | Listeria_monocytogenes_1639_v101 | 0.896  |
| Listeria_monocytogenes_L312_882094                       | Listeria_monocytogenes_1639_v101 | 0.9285 |
| Listeria_monocytogenes_J1816_930781                      | Listeria_monocytogenes_1639_v101 | 0.9186 |
| Listeria_monocytogenes_J1-220_930782                     | Listeria_monocytogenes_1639_v101 | 0.919  |
| Listeria_monocytogenes_J0161_393130                      | Listeria_monocytogenes_1639_v101 | 0.9403 |
| Listeria_monocytogenes_HCC23_552536                      | Listeria_monocytogenes_1639_v101 | 0.8957 |
| Listeria_monocytogenes_FSL_R2-561_393126                 | Listeria_monocytogenes_1639_v101 | 0.9539 |
| Listeria_monocytogenes_FSL_J1-208_393119                 | Listeria_monocytogenes_1639_v101 | 0.8884 |
| Listeria_monocytogenes_FSL_J1-175_393118                 | Listeria_monocytogenes_1639_v101 | 0.931  |
| Listeria_monocytogenes_Finland_1998_393127               | Listeria_monocytogenes_1639_v101 | 0.9487 |
| Listeria_monocytogenes_EGD-e_169963_v1                   | Listeria_monocytogenes_1639_v101 | 0.939  |
| Listeria_monocytogenes_EGD-e_169963                      | Listeria_monocytogenes_1639_v101 | 0.939  |
| Listeria_monocytogenes_EGD_1334565                       | Listeria_monocytogenes_1639_v101 | 0.9504 |
| Listeria_monocytogenes_CFSAN002349_1299895               | Listeria_monocytogenes_1639_v101 | 0.9258 |
| Listeria_monocytogenes_ATCC_19117_882095_v1              | Listeria_monocytogenes_1639_v101 | 0.9203 |
| Listeria_monocytogenes_ATCC_19117_882095                 | Listeria_monocytogenes_1639_v101 | 0.9202 |
| Listeria_monocytogenes_6179_1288295                      | Listeria_monocytogenes_1639_v101 | 0.9513 |
| Listeria_monocytogenes_1639_v9                           | Listeria_monocytogenes_1639_v101 | 0.9192 |
| Listeria_monocytogenes_1639_v99                          | Listeria_monocytogenes_1639_v101 | 0.9249 |
| Listeria_monocytogenes_1639_v98                          | Listeria_monocytogenes_1639_v101 | 0.9366 |
| Listeria_monocytogenes_1639_v97                          | Listeria_monocytogenes_1639_v101 | 0.9225 |
| Listeria_monocytogenes_1639_v96                          | Listeria_monocytogenes_1639_v101 | 0.9253 |
| Listeria_monocytogenes_1639_v95                          | Listeria_monocytogenes_1639_v101 | 0.9254 |
| Listeria_monocytogenes_1639_v94                          | Listeria_monocytogenes_1639_v101 | 0.9257 |
| Listeria_monocytogenes_1639_v93                          | Listeria_monocytogenes_1639_v101 | 0.9476 |
| Listeria_monocytogenes_1639_v92                          | Listeria_monocytogenes_1639_v101 | 0.9253 |
| Listeria_monocytogenes_1639_v91                          | Listeria_monocytogenes_1639_v101 | 0.9204 |
| Listeria_monocytogenes_1639_v90                          | Listeria_monocytogenes_1639_v101 | 0.9366 |
| Listeria_monocytogenes_1639_v8                           | Listeria_monocytogenes_1639_v101 | 0.9736 |
| Listeria_monocytogenes_1639_v89                          | Listeria_monocytogenes_1639_v101 | 0.9251 |
| Listeria_monocytogenes_1639_v88                          | Listeria_monocytogenes_1639_v101 | 0.9541 |
| Listeria_monocytogenes_1639_v87                          | Listeria_monocytogenes_1639_v101 | 0.9484 |
| Listeria_monocytogenes_1639_v86                          | Listeria_monocytogenes_1639_v101 | 0.9477 |
| Listeria_monocytogenes_1639_v85                          | Listeria_monocytogenes_1639_v101 | 0.9118 |
| Listeria_monocytogenes_1639_v84                          | Listeria_monocytogenes_1639_v101 | 0.9544 |
| Listeria_monocytogenes_1639_v83                          | Listeria_monocytogenes_1639_v101 | 0.9145 |
| Listeria_monocytogenes_1639_v82                          | Listeria_monocytogenes_1639_v101 | 0.9142 |
| Listeria_monocytogenes_1639_v81                          | Listeria_monocytogenes_1639_v101 | 0.9612 |
| Listeria_monocytogenes_1639_v80                          | Listeria_monocytogenes_1639_v101 | 0.9329 |
| Listeria_monocytogenes_1639_v7                           | Listeria_monocytogenes_1639_v101 | 0.9736 |
| Listeria_monocytogenes_1639_v79                          | Listeria_monocytogenes_1639_v101 | 0.9557 |
| Listeria_monocytogenes_1639_v78                          | Listeria_monocytogenes_1639_v101 | 0.9604 |
| Listeria_monocytogenes_1639_v77                          | Listeria_monocytogenes_1639_v101 | 0.9451 |
| Listeria_monocytogenes_1639_v76                          | Listeria_monocytogenes_1639_v101 | 0.9435 |
| Listeria_monocytogenes_1639_v75                          | Listeria_monocytogenes_1639_v101 | 0.896  |
| Listeria_monocytogenes_1639_v74                          | Listeria_monocytogenes_1639_v101 | 0.9425 |
| Listeria_monocytogenes_1639_v73                          | Listeria_monocytogenes_1639_v101 | 0.952  |
| Listeria_monocytogenes_1639_v72                          | Listeria_monocytogenes_1639_v101 | 0.9144 |
| Listeria_monocytogenes_1639_v71                          | Listeria_monocytogenes_1639_v101 | 0.9408 |
| Listeria_monocytogenes_1639_v70                          | Listeria_monocytogenes_1639_v101 | 0.9526 |
| Listeria_monocytogenes_1639_v6                           | Listeria_monocytogenes_1639_v101 | 0.9729 |
| Listeria_monocytogenes_1639_v69                          | Listeria_monocytogenes_1639_v101 | 0.9128 |
| Listeria_monocytogenes_1639_v68                          | Listeria_monocytogenes_1639_v101 | 0.9363 |
| Listeria_monocytogenes_1639_v67                          | Listeria_monocytogenes_1639_v101 | 0.9341 |
| Listeria_monocytogenes_1639_v66                          | Listeria_monocytogenes_1639_v101 | 0.9479 |
| Listeria_monocytogenes_1639_v65                          | Listeria_monocytogenes_1639_v101 | 0.9651 |
| Listeria_monocytogenes_1639_v64                          | Listeria_monocytogenes_1639_v101 | 0.9431 |
| Listeria_monocytogenes_1639_v63                          | Listeria_monocytogenes_1639_v101 | 0.9415 |
| Listeria_monocytogenes_1639_v62                          | Listeria_monocytogenes_1639_v101 | 0.9551 |
| Listeria_monocytogenes_1639_v61                          | Listeria_monocytogenes_1639_v101 | 0.9684 |
| Listeria_monocytogenes_1639_v60                          | Listeria_monocytogenes_1639_v101 | 0.9437 |
| Listeria_monocytogenes_1639_v5                           | Listeria_monocytogenes_1639_v101 | 0.9019 |
| Listeria_monocytogenes_1639_v59                          | Listeria_monocytogenes_1639_v101 | 0.9189 |
| Listeria_monocytogenes_1639_v58                          | Listeria_monocytogenes_1639_v101 | 0.9137 |
| Listeria_monocytogenes_1639_v57                          | Listeria_monocytogenes_1639_v101 | 0.9158 |
| Listeria_monocytogenes_1639_v56                          | Listeria_monocytogenes_1639_v101 | 0.92   |
| Listeria_monocytogenes_1639_v55                          | Listeria_monocytogenes_1639_v101 | 0.919  |
| Listeria_monocytogenes_1639_v54                          | Listeria_monocytogenes_1639_v101 | 0.9135 |
| Listeria_monocytogenes_1639_v53                          | Listeria_monocytogenes_1639_v101 | 0.933  |
| Listeria_monocytogenes_1639_v52                          | Listeria_monocytogenes_1639_v101 | 0.9199 |
| Listeria_monocytogenes_1639_v51                          | Listeria_monocytogenes_1639_v101 | 0.9146 |
| Listeria_monocytogenes_1639_v50                          | Listeria_monocytogenes_1639_v101 | 0.9659 |
| Listeria_monocytogenes_1639_v4                           | Listeria_monocytogenes_1639_v101 | 0.9074 |
| Listeria_monocytogenes_1639_v49                          | Listeria_monocytogenes_1639_v101 | 0.9106 |

[illegible]

|                                                          |                                  |        |
|----------------------------------------------------------|----------------------------------|--------|
| Listeria_monocytogenes_1639_v145                         | Listeria_monocytogenes_1639_v101 | 0.9406 |
| Listeria_monocytogenes_1639_v144                         | Listeria_monocytogenes_1639_v101 | 0.9282 |
| Listeria_monocytogenes_1639_v143                         | Listeria_monocytogenes_1639_v101 | 0.9428 |
| Listeria_monocytogenes_1639_v142                         | Listeria_monocytogenes_1639_v101 | 0.9282 |
| Listeria_monocytogenes_1639_v141                         | Listeria_monocytogenes_1639_v101 | 0.9352 |
| Listeria_monocytogenes_1639_v140                         | Listeria_monocytogenes_1639_v101 | 0.9285 |
| Listeria_monocytogenes_1639_v13                          | Listeria_monocytogenes_1639_v101 | 0.9244 |
| Listeria_monocytogenes_1639_v139                         | Listeria_monocytogenes_1639_v101 | 0.9226 |
| Listeria_monocytogenes_1639_v138                         | Listeria_monocytogenes_1639_v101 | 0.9308 |
| Listeria_monocytogenes_1639_v137                         | Listeria_monocytogenes_1639_v101 | 0.9305 |
| Listeria_monocytogenes_1639_v136                         | Listeria_monocytogenes_1639_v101 | 0.9483 |
| Listeria_monocytogenes_1639_v135                         | Listeria_monocytogenes_1639_v101 | 0.8961 |
| Listeria_monocytogenes_1639_v134                         | Listeria_monocytogenes_1639_v101 | 0.9165 |
| Listeria_monocytogenes_1639_v133                         | Listeria_monocytogenes_1639_v101 | 0.9492 |
| Listeria_monocytogenes_1639_v132                         | Listeria_monocytogenes_1639_v101 | 0.9    |
| Listeria_monocytogenes_1639_v131                         | Listeria_monocytogenes_1639_v101 | 0.9208 |
| Listeria_monocytogenes_1639_v130                         | Listeria_monocytogenes_1639_v101 | 0.9469 |
| Listeria_monocytogenes_1639_v12                          | Listeria_monocytogenes_1639_v101 | 0.9437 |
| Listeria_monocytogenes_1639_v129                         | Listeria_monocytogenes_1639_v101 | 0.9308 |
| Listeria_monocytogenes_1639_v128                         | Listeria_monocytogenes_1639_v101 | 0.9318 |
| Listeria_monocytogenes_1639_v127                         | Listeria_monocytogenes_1639_v101 | 0.939  |
| Listeria_monocytogenes_1639_v126                         | Listeria_monocytogenes_1639_v101 | 0.9333 |
| Listeria_monocytogenes_1639_v125                         | Listeria_monocytogenes_1639_v101 | 0.9436 |
| Listeria_monocytogenes_1639_v124                         | Listeria_monocytogenes_1639_v101 | 0.9044 |
| Listeria_monocytogenes_1639_v123                         | Listeria_monocytogenes_1639_v101 | 0.9258 |
| Listeria_monocytogenes_1639_v122                         | Listeria_monocytogenes_1639_v101 | 0.9257 |
| Listeria_monocytogenes_1639_v121                         | Listeria_monocytogenes_1639_v101 | 0.9257 |
| Listeria_monocytogenes_1639_v120                         | Listeria_monocytogenes_1639_v101 | 0.9254 |
| Listeria_monocytogenes_1639_v11                          | Listeria_monocytogenes_1639_v101 | 0.9483 |
| Listeria_monocytogenes_1639_v119                         | Listeria_monocytogenes_1639_v101 | 0.9257 |
| Listeria_monocytogenes_1639_v118                         | Listeria_monocytogenes_1639_v101 | 0.9257 |
| Listeria_monocytogenes_1639_v117                         | Listeria_monocytogenes_1639_v101 | 0.946  |
| Listeria_monocytogenes_1639_v116                         | Listeria_monocytogenes_1639_v101 | 0.916  |
| Listeria_monocytogenes_1639_v115                         | Listeria_monocytogenes_1639_v101 | 0.9164 |
| Listeria_monocytogenes_1639_v114                         | Listeria_monocytogenes_1639_v101 | 0.9533 |
| Listeria_monocytogenes_1639_v113                         | Listeria_monocytogenes_1639_v101 | 0.9395 |
| Listeria_monocytogenes_1639_v112                         | Listeria_monocytogenes_1639_v101 | 0.923  |
| Listeria_monocytogenes_1639_v111                         | Listeria_monocytogenes_1639_v101 | 0.929  |
| Listeria_monocytogenes_1639_v110                         | Listeria_monocytogenes_1639_v101 | 0.9455 |
| Listeria_monocytogenes_1639_v10                          | Listeria_monocytogenes_1639_v101 | 0.9192 |
| Listeria_monocytogenes_1639_v109                         | Listeria_monocytogenes_1639_v101 | 0.957  |
| Listeria_monocytogenes_1639_v108                         | Listeria_monocytogenes_1639_v101 | 0.9207 |
| Listeria_monocytogenes_1639_v107                         | Listeria_monocytogenes_1639_v101 | 0.9188 |
| Listeria_monocytogenes_1639_v106                         | Listeria_monocytogenes_1639_v101 | 0.9192 |
| Listeria_monocytogenes_1639_v105                         | Listeria_monocytogenes_1639_v101 | 0.9192 |
| Listeria_monocytogenes_1639_v104                         | Listeria_monocytogenes_1639_v101 | 0.9196 |
| Listeria_monocytogenes_1639_v103                         | Listeria_monocytogenes_1639_v101 | 0.9196 |
| Listeria_monocytogenes_1639_v102                         | Listeria_monocytogenes_1639_v101 | 0.9874 |
| Listeria_monocytogenes_1639_v101                         | Listeria_monocytogenes_1639_v101 | 0.0729 |
| Listeria_welshimeri_1643                                 | Listeria_monocytogenes_1639_v102 | 0.875  |
| Listeria_welshimeri_serovar_6b_str_SLCC5334_386043       | Listeria_monocytogenes_1639_v102 | 0.8743 |
| Listeria_seeligeri_serovar_1_2b_str_SLCC3954_683837      | Listeria_monocytogenes_1639_v102 | 0.8802 |
| Listeria_seeligeri_FSL_S4-171_702452                     | Listeria_monocytogenes_1639_v102 | 0.8199 |
| Listeria_seeligeri_FSL_N1-067_702453                     | Listeria_monocytogenes_1639_v102 | 0.84   |
| Listeria_seeligeri_1640_v1                               | Listeria_monocytogenes_1639_v102 | 0.8771 |
| Listeria_seeligeri_1640                                  | Listeria_monocytogenes_1639_v102 | 0.8754 |
| Listeria_monocytogenes_WSLC1042_1457188                  | Listeria_monocytogenes_1639_v102 | 0.9267 |
| Listeria_monocytogenes_WSLC1001_1457187                  | Listeria_monocytogenes_1639_v102 | 0.9609 |
| Listeria_monocytogenes_SLCC7179_879090                   | Listeria_monocytogenes_1639_v102 | 0.9567 |
| Listeria_monocytogenes_SLCC5850_882096                   | Listeria_monocytogenes_1639_v102 | 0.9618 |
| Listeria_monocytogenes_SLCC2755_932919                   | Listeria_monocytogenes_1639_v102 | 0.9265 |
| Listeria_monocytogenes_SLCC2540_879089                   | Listeria_monocytogenes_1639_v102 | 0.9447 |
| Listeria_monocytogenes_SLCC2479_882020                   | Listeria_monocytogenes_1639_v102 | 0.9634 |
| Listeria_monocytogenes_SLCC2378_879088                   | Listeria_monocytogenes_1639_v102 | 0.9281 |
| Listeria_monocytogenes_SLCC2376_882097                   | Listeria_monocytogenes_1639_v102 | 0.9326 |
| Listeria_monocytogenes_SLCC2372_932920                   | Listeria_monocytogenes_1639_v102 | 0.9555 |
| Listeria_monocytogenes_serotype_4b_str_LL195_1230340     | Listeria_monocytogenes_1639_v102 | 0.9338 |
| Listeria_monocytogenes_serotype_4b_str_LIS0087_1134669   | Listeria_monocytogenes_1639_v102 | 0.9405 |
| Listeria_monocytogenes_serotype_4b_str_F2365_265669      | Listeria_monocytogenes_1639_v102 | 0.9338 |
| Listeria_monocytogenes_serotype_4b_str_CLIP_80459_568819 | Listeria_monocytogenes_1639_v102 | 0.9405 |
| Listeria_monocytogenes_serotype_4b_str_81-0861_1196161   | Listeria_monocytogenes_1639_v102 | 0.9226 |
| Listeria_monocytogenes_serotype_4b_str_81-0592_1196160   | Listeria_monocytogenes_1639_v102 | 0.9237 |
| Listeria_monocytogenes_serotype_4b_str_81-0              |                                  |        |



|                                                          |                                  |        |
|----------------------------------------------------------|----------------------------------|--------|
| Listeria_monocytogenes_serotype_1_2a_str_10-1321_1196191 | Listeria_monocytogenes_1639_v102 | 0.9777 |
| Listeria_monocytogenes_serotype_1_2a_str_10-1047_1196190 | Listeria_monocytogenes_1639_v102 | 0.9773 |
| Listeria_monocytogenes_serotype_1_2a_str_10-1046_1196189 | Listeria_monocytogenes_1639_v102 | 0.9773 |
| Listeria_monocytogenes_serotype_1_2a_str_10-0934_1196170 | Listeria_monocytogenes_1639_v102 | 0.9606 |
| Listeria_monocytogenes_serotype_1_2a_str_10-0933_1196169 | Listeria_monocytogenes_1639_v102 | 0.9606 |
| Listeria_monocytogenes_serotype_1_2a_str_10-0815_1196188 | Listeria_monocytogenes_1639_v102 | 0.9727 |
| Listeria_monocytogenes_serotype_1_2a_str_10-0814_1196187 | Listeria_monocytogenes_1639_v102 | 0.9774 |
| Listeria_monocytogenes_serotype_1_2a_str_10-0813_1196166 | Listeria_monocytogenes_1639_v102 | 0.961  |
| Listeria_monocytogenes_serotype_1_2a_str_10-0812_1196165 | Listeria_monocytogenes_1639_v102 | 0.961  |
| Listeria_monocytogenes_serotype_1_2a_str_08-7669_1196186 | Listeria_monocytogenes_1639_v102 | 0.973  |
| Listeria_monocytogenes_serotype_1_2a_str_08-7374_1196185 | Listeria_monocytogenes_1639_v102 | 0.9777 |
| Listeria_monocytogenes_serotype_1_2a_str_08-6997_1196184 | Listeria_monocytogenes_1639_v102 | 0.9727 |
| Listeria_monocytogenes_serotype_1_2a_str_08-6569_1196183 | Listeria_monocytogenes_1639_v102 | 0.9727 |
| Listeria_monocytogenes_serotype_1_2a_str_08-6056_1196182 | Listeria_monocytogenes_1639_v102 | 0.9727 |
| Listeria_monocytogenes_serotype_1_2a_str_04-5457_1196181 | Listeria_monocytogenes_1639_v102 | 0.9777 |
| Listeria_monocytogenes_serotype_1_2a_str_02-5993_1196180 | Listeria_monocytogenes_1639_v102 | 0.9774 |
| Listeria_monocytogenes_R479a_1437838                     | Listeria_monocytogenes_1639_v102 | 0.9837 |
| Listeria_monocytogenes_N53-1_1234142                     | Listeria_monocytogenes_1639_v102 | 0.9016 |
| Listeria_monocytogenes_M7_1030009                        | Listeria_monocytogenes_1639_v102 | 0.9052 |
| Listeria_monocytogenes_LO28_393132                       | Listeria_monocytogenes_1639_v102 | 0.959  |
| Listeria_monocytogenes_L99_563174                        | Listeria_monocytogenes_1639_v102 | 0.9058 |
| Listeria_monocytogenes_L312_882094                       | Listeria_monocytogenes_1639_v102 | 0.9405 |
| Listeria_monocytogenes_J1816_930781                      | Listeria_monocytogenes_1639_v102 | 0.9303 |
| Listeria_monocytogenes_J1-220_930782                     | Listeria_monocytogenes_1639_v102 | 0.9302 |
| Listeria_monocytogenes_J0161_393130                      | Listeria_monocytogenes_1639_v102 | 0.9519 |
| Listeria_monocytogenes_HCC23_552536                      | Listeria_monocytogenes_1639_v102 | 0.9055 |
| Listeria_monocytogenes_FSL_R2-561_393126                 | Listeria_monocytogenes_1639_v102 | 0.9653 |
| Listeria_monocytogenes_FSL_J1-208_393119                 | Listeria_monocytogenes_1639_v102 | 0.8979 |
| Listeria_monocytogenes_FSL_J1-175_393118                 | Listeria_monocytogenes_1639_v102 | 0.9422 |
| Listeria_monocytogenes_Finland_1998_393127               | Listeria_monocytogenes_1639_v102 | 0.961  |
| Listeria_monocytogenes_EGD-e_169963_v1                   | Listeria_monocytogenes_1639_v102 | 0.951  |
| Listeria_monocytogenes_EGD-e_169963                      | Listeria_monocytogenes_1639_v102 | 0.951  |
| Listeria_monocytogenes_EGD_1334565                       | Listeria_monocytogenes_1639_v102 | 0.9626 |
| Listeria_monocytogenes_CFSAN002349_1299895               | Listeria_monocytogenes_1639_v102 | 0.9373 |
| Listeria_monocytogenes_ATCC_19117_882095_v1              | Listeria_monocytogenes_1639_v102 | 0.9317 |
| Listeria_monocytogenes_ATCC_19117_882095                 | Listeria_monocytogenes_1639_v102 | 0.9317 |
| Listeria_monocytogenes_6179_1288295                      | Listeria_monocytogenes_1639_v102 | 0.9481 |
| Listeria_monocytogenes_1639_v9                           | Listeria_monocytogenes_1639_v102 | 0.9303 |
| Listeria_monocytogenes_1639_v99                          | Listeria_monocytogenes_1639_v102 | 0.9299 |
| Listeria_monocytogenes_1639_v98                          | Listeria_monocytogenes_1639_v102 | 0.9484 |
| Listeria_monocytogenes_1639_v97                          | Listeria_monocytogenes_1639_v102 | 0.9343 |
| Listeria_monocytogenes_1639_v96                          | Listeria_monocytogenes_1639_v102 | 0.9304 |
| Listeria_monocytogenes_1639_v95                          | Listeria_monocytogenes_1639_v102 | 0.9304 |
| Listeria_monocytogenes_1639_v94                          | Listeria_monocytogenes_1639_v102 | 0.9307 |
| Listeria_monocytogenes_1639_v93                          | Listeria_monocytogenes_1639_v102 | 0.9439 |
| Listeria_monocytogenes_1639_v92                          | Listeria_monocytogenes_1639_v102 | 0.9303 |
| Listeria_monocytogenes_1639_v91                          | Listeria_monocytogenes_1639_v102 | 0.9321 |
| Listeria_monocytogenes_1639_v90                          | Listeria_monocytogenes_1639_v102 | 0.9484 |
| Listeria_monocytogenes_1639_v8                           | Listeria_monocytogenes_1639_v102 | 0.9641 |
| Listeria_monocytogenes_1639_v89                          | Listeria_monocytogenes_1639_v102 | 0.937  |
| Listeria_monocytogenes_1639_v88                          | Listeria_monocytogenes_1639_v102 | 0.9659 |
| Listeria_monocytogenes_1639_v87                          | Listeria_monocytogenes_1639_v102 | 0.9597 |
| Listeria_monocytogenes_1639_v86                          | Listeria_monocytogenes_1639_v102 | 0.959  |
| Listeria_monocytogenes_1639_v85                          | Listeria_monocytogenes_1639_v102 | 0.923  |
| Listeria_monocytogenes_1639_v84                          | Listeria_monocytogenes_1639_v102 | 0.9658 |
| Listeria_monocytogenes_1639_v83                          | Listeria_monocytogenes_1639_v102 | 0.9258 |
| Listeria_monocytogenes_1639_v82                          | Listeria_monocytogenes_1639_v102 | 0.9255 |
| Listeria_monocytogenes_1639_v81                          | Listeria_monocytogenes_1639_v102 | 0.973  |
| Listeria_monocytogenes_1639_v80                          | Listeria_monocytogenes_1639_v102 | 0.9444 |
| Listeria_monocytogenes_1639_v7                           | Listeria_monocytogenes_1639_v102 | 0.9641 |
| Listeria_monocytogenes_1639_v79                          | Listeria_monocytogenes_1639_v102 | 0.9671 |
| Listeria_monocytogenes_1639_v78                          | Listeria_monocytogenes_1639_v102 | 0.9719 |
| Listeria_monocytogenes_1639_v77                          | Listeria_monocytogenes_1639_v102 | 0.9564 |
| Listeria_monocytogenes_1639_v76                          | Listeria_monocytogenes_1639_v102 | 0.955  |
| Listeria_monocytogenes_1639_v75                          | Listeria_monocytogenes_1639_v102 | 0.9058 |
| Listeria_monocytogenes_1639_v74                          | Listeria_monocytogenes_1639_v102 | 0.9455 |
| Listeria_monocytogenes_1639_v73                          | Listeria_monocytogenes_1639_v102 | 0.954  |
| Listeria_monocytogenes_1639_v72                          | Listeria_monocytogenes_1639_v102 | 0.9257 |
| Listeria_monocytogenes_1639_v71                          | Listeria_monocytogenes_1639_v102 | 0.9437 |
| Listeria_monocytogenes_1639_v70                          | Listeria_monocytogenes_1639_v102 | 0.9624 |
| Listeria_monocytogenes_1639_v6                           | Listeria_monocytogenes_1639_v102 | 0.9634 |
| Listeria_monocytogenes_1639_v69                          | Listeria_monocytogenes_1639_v102 | 0.924  |
| Listeria_monocytogenes_1639_v68                          | Listeria_monocytogenes_1639_v102 | 0.9475 |
| Listeria_monocytogenes_1639_v67                          | Listeria_monocytogenes_1639_v102 | 0.9457 |
| Listeria_monocytogenes_1639_v66                          | Listeria_monocytogenes_1639_v102 | 0.9589 |
| Listeria_monocytogenes_1639_v65                          | Listeria_monocytogenes_1639_v102 | 0.9773 |
| Listeria_monocytogenes_1639_v64                          | Listeria_monocytogenes_1639_v102 | 0.9529 |
| Listeria_monocytogenes_1639_v63                          | Listeria_monocytogenes_1639_v102 | 0.9456 |
| Listeria_monocytogenes_1639_v62                          | Listeria_monocytogenes_1639_v102 | 0.9668 |
| Listeria_monocytogenes_1639_v61                          | Listeria_monocytogenes_1639_v102 | 0.9803 |
| Listeria_monocytogenes_1639_v60                          | Listeria_monocytogenes_1639_v102 | 0.9554 |
| Listeria_monocytogenes_1639_v5                           | Listeria_monocytogenes_1639_v102 | 0.899  |
| Listeria_monocytogenes_1639_v59                          | Listeria_monocytogenes_1639_v102 | 0.9302 |
| Listeria_monocytogenes_1639_v58                          | Listeria_monocytogenes_1639_v102 | 0.925  |
| Listeria_monocytogenes_1639_v57                          | Listeria_monocytogenes_1639_v102 | 0.9273 |
| Listeria_monocytogenes_1639_v56                          | Listeria_monocytogenes_1639_v102 | 0.9314 |
| Listeria_monocytogenes_1639_v55                          | Listeria_monocytogenes_1639_v102 | 0.9239 |
| Listeria_monocytogenes_1639_v54                          | Listeria_monocytogenes_1639_v102 | 0.9249 |
| Listeria_monocytogenes_1639_v53                          | Listeria_monocytogenes_1639_v102 | 0.9434 |
| Listeria_monocytogenes_1639_v52                          | Listeria_monocytogenes_1639_v102 | 0.9316 |
| Listeria_monocytogenes_1639_v51                          | Listeria_monocytogenes_1639_v102 | 0.9221 |



|                                                          |                                  |        |
|----------------------------------------------------------|----------------------------------|--------|
| Listeria_monocytogenes_1639_v148                         | Listeria_monocytogenes_1639_v102 | 0.9362 |
| Listeria_monocytogenes_1639_v147                         | Listeria_monocytogenes_1639_v102 | 0.9226 |
| Listeria_monocytogenes_1639_v146                         | Listeria_monocytogenes_1639_v102 | 0.9572 |
| Listeria_monocytogenes_1639_v145                         | Listeria_monocytogenes_1639_v102 | 0.9513 |
| Listeria_monocytogenes_1639_v144                         | Listeria_monocytogenes_1639_v102 | 0.9402 |
| Listeria_monocytogenes_1639_v143                         | Listeria_monocytogenes_1639_v102 | 0.9546 |
| Listeria_monocytogenes_1639_v142                         | Listeria_monocytogenes_1639_v102 | 0.9402 |
| Listeria_monocytogenes_1639_v141                         | Listeria_monocytogenes_1639_v102 | 0.9473 |
| Listeria_monocytogenes_1639_v140                         | Listeria_monocytogenes_1639_v102 | 0.9405 |
| Listeria_monocytogenes_1639_v13                          | Listeria_monocytogenes_1639_v102 | 0.929  |
| Listeria_monocytogenes_1639_v139                         | Listeria_monocytogenes_1639_v102 | 0.9342 |
| Listeria_monocytogenes_1639_v138                         | Listeria_monocytogenes_1639_v102 | 0.9429 |
| Listeria_monocytogenes_1639_v137                         | Listeria_monocytogenes_1639_v102 | 0.9425 |
| Listeria_monocytogenes_1639_v136                         | Listeria_monocytogenes_1639_v102 | 0.96   |
| Listeria_monocytogenes_1639_v135                         | Listeria_monocytogenes_1639_v102 | 0.9065 |
| Listeria_monocytogenes_1639_v134                         | Listeria_monocytogenes_1639_v102 | 0.9279 |
| Listeria_monocytogenes_1639_v133                         | Listeria_monocytogenes_1639_v102 | 0.961  |
| Listeria_monocytogenes_1639_v132                         | Listeria_monocytogenes_1639_v102 | 0.9081 |
| Listeria_monocytogenes_1639_v131                         | Listeria_monocytogenes_1639_v102 | 0.9326 |
| Listeria_monocytogenes_1639_v130                         | Listeria_monocytogenes_1639_v102 | 0.9499 |
| Listeria_monocytogenes_1639_v12                          | Listeria_monocytogenes_1639_v102 | 0.9449 |
| Listeria_monocytogenes_1639_v129                         | Listeria_monocytogenes_1639_v102 | 0.9429 |
| Listeria_monocytogenes_1639_v128                         | Listeria_monocytogenes_1639_v102 | 0.9438 |
| Listeria_monocytogenes_1639_v127                         | Listeria_monocytogenes_1639_v102 | 0.951  |
| Listeria_monocytogenes_1639_v126                         | Listeria_monocytogenes_1639_v102 | 0.9453 |
| Listeria_monocytogenes_1639_v125                         | Listeria_monocytogenes_1639_v102 | 0.955  |
| Listeria_monocytogenes_1639_v124                         | Listeria_monocytogenes_1639_v102 | 0.916  |
| Listeria_monocytogenes_1639_v123                         | Listeria_monocytogenes_1639_v102 | 0.9373 |
| Listeria_monocytogenes_1639_v122                         | Listeria_monocytogenes_1639_v102 | 0.9373 |
| Listeria_monocytogenes_1639_v121                         | Listeria_monocytogenes_1639_v102 | 0.9373 |
| Listeria_monocytogenes_1639_v120                         | Listeria_monocytogenes_1639_v102 | 0.937  |
| Listeria_monocytogenes_1639_v11                          | Listeria_monocytogenes_1639_v102 | 0.9451 |
| Listeria_monocytogenes_1639_v119                         | Listeria_monocytogenes_1639_v102 | 0.9373 |
| Listeria_monocytogenes_1639_v118                         | Listeria_monocytogenes_1639_v102 | 0.9373 |
| Listeria_monocytogenes_1639_v117                         | Listeria_monocytogenes_1639_v102 | 0.957  |
| Listeria_monocytogenes_1639_v116                         | Listeria_monocytogenes_1639_v102 | 0.9274 |
| Listeria_monocytogenes_1639_v115                         | Listeria_monocytogenes_1639_v102 | 0.9278 |
| Listeria_monocytogenes_1639_v114                         | Listeria_monocytogenes_1639_v102 | 0.9651 |
| Listeria_monocytogenes_1639_v113                         | Listeria_monocytogenes_1639_v102 | 0.9512 |
| Listeria_monocytogenes_1639_v112                         | Listeria_monocytogenes_1639_v102 | 0.9345 |
| Listeria_monocytogenes_1639_v111                         | Listeria_monocytogenes_1639_v102 | 0.9334 |
| Listeria_monocytogenes_1639_v110                         | Listeria_monocytogenes_1639_v102 | 0.9572 |
| Listeria_monocytogenes_1639_v10                          | Listeria_monocytogenes_1639_v102 | 0.9303 |
| Listeria_monocytogenes_1639_v109                         | Listeria_monocytogenes_1639_v102 | 0.9689 |
| Listeria_monocytogenes_1639_v108                         | Listeria_monocytogenes_1639_v102 | 0.9324 |
| Listeria_monocytogenes_1639_v107                         | Listeria_monocytogenes_1639_v102 | 0.9303 |
| Listeria_monocytogenes_1639_v106                         | Listeria_monocytogenes_1639_v102 | 0.9307 |
| Listeria_monocytogenes_1639_v105                         | Listeria_monocytogenes_1639_v102 | 0.9307 |
| Listeria_monocytogenes_1639_v104                         | Listeria_monocytogenes_1639_v102 | 0.931  |
| Listeria_monocytogenes_1639_v103                         | Listeria_monocytogenes_1639_v102 | 0.931  |
| Listeria_monocytogenes_1639_v102                         | Listeria_monocytogenes_1639_v102 | 0.0695 |
| Listeria_welshimeri_1643                                 | Listeria_monocytogenes_1639_v103 | 0.8904 |
| Listeria_welshimeri_serovar_6b_str_SLCC5334_386043       | Listeria_monocytogenes_1639_v103 | 0.89   |
| Listeria_seeligeri_serovar_1_2b_str_SLCC3954_683837      | Listeria_monocytogenes_1639_v103 | 0.8872 |
| Listeria_seeligeri_FSL_S4-171_702452                     | Listeria_monocytogenes_1639_v103 | 0.8276 |
| Listeria_seeligeri_FSL_N1-067_702453                     | Listeria_monocytogenes_1639_v103 | 0.8296 |
| Listeria_seeligeri_1640_v1                               | Listeria_monocytogenes_1639_v103 | 0.8941 |
| Listeria_seeligeri_1640                                  | Listeria_monocytogenes_1639_v103 | 0.8807 |
| Listeria_monocytogenes_WSLC1042_1457188                  | Listeria_monocytogenes_1639_v103 | 0.9802 |
| Listeria_monocytogenes_WSLC1001_1457187                  | Listeria_monocytogenes_1639_v103 | 0.9313 |
| Listeria_monocytogenes_SLCC7179_879090                   | Listeria_monocytogenes_1639_v103 | 0.9379 |
| Listeria_monocytogenes_SLCC5850_882096                   | Listeria_monocytogenes_1639_v103 | 0.9355 |
| Listeria_monocytogenes_SLCC2755_932919                   | Listeria_monocytogenes_1639_v103 | 0.9448 |
| Listeria_monocytogenes_SLCC2540_879089                   | Listeria_monocytogenes_1639_v103 | 0.948  |
| Listeria_monocytogenes_SLCC2479_882020                   | Listeria_monocytogenes_1639_v103 | 0.9261 |
| Listeria_monocytogenes_SLCC2378_879088                   | Listeria_monocytogenes_1639_v103 | 0.9817 |
| Listeria_monocytogenes_SLCC2376_882097                   | Listeria_monocytogenes_1639_v103 | 0.9413 |
| Listeria_monocytogenes_SLCC2372_932920                   | Listeria_monocytogenes_1639_v103 | 0.9188 |
| Listeria_monocytogenes_serotype_4b_str_LL195_1230340     | Listeria_monocytogenes_1639_v103 | 0.9766 |
| Listeria_monocytogenes_serotype_4b_str_LIS0087_1134669   | Listeria_monocytogenes_1639_v103 | 0.9122 |
| Listeria_monocytogenes_serotype_4b_str_F2365_265669      | Listeria_monocytogenes_1639_v103 | 0.9766 |
| Listeria_monocytogenes_serotype_4b_str_CLIP_80459_568819 | Listeria_monocytogenes_1639_v103 | 0.9719 |
| Listeria_monocytogenes_serotype_4b_str_81-0861_1196161   | Listeria_monocytogenes_1639_v103 | 0.9702 |
| Listeria_monocytogenes_serotype_4b_str_81-0592_1196160   | Listeria_monocytogenes_1639_v103 | 0.9713 |
| Listeria_monocytogenes_serotype_4b_str_81-0558_1196159   | Listeria_monocytogenes_1639_v103 | 0.9705 |
| Listeria_monocytogenes_serotype_4b_str_10-0809_1196162   | Listeria_monocytogenes_1639_v103 | 0.9713 |
| Listeria_monocytogenes_serotype_4b_str_02-6680_1196175   | Listeria_monocytogenes_1639_v103 | 0.9785 |
| Listeria_monocytogenes_serotype_4b_str_02-6679_1196174   | Listeria_monocytogenes_1639_v103 | 0.9785 |
| Listeria_monocytogenes_serotype_4b_str_02-1792_1196173   | Listeria_monocytogenes_1639_v103 | 0.9705 |
| Listeria_monocytogenes_serotype_4b_str_02-1289_1196172   | Listeria_monocytogenes_1639_v103 | 0.9705 |
| Listeria_monocytogenes_serotype_4b_str_02-1103_1196171   | Listeria_monocytogenes_1639_v103 | 0.9705 |
| Listeria_monocytogenes_serotype_3c_str_10-5027_1196195   | Listeria_monocytogenes_1639_v103 | 0.9253 |
| Listeria_monocytogenes_serotype_1_2c_str_10-5026_1196194 | Listeria_monocytogenes_1639_v103 | 0.9261 |
| Listeria_monocytogenes_serotype_1_2c_str_10-5025_1196193 | Listeria_monocytogenes_1639_v103 | 0.9261 |
| Listeria_monocytogenes_serotype_1_2b_str_10-0811_1196164 | Listeria_monocytogenes_1639_v103 | 0.9388 |
| Listeria_monocytogenes_serotype_1_2b_str_10-0810_1196163 | Listeria_monocytogenes_1639_v103 | 0.9388 |
| Listeria_monocytogenes_serotype_1_2a_str_99-6370_1196179 | Listeria_monocytogenes_1639_v103 | 0.9151 |
| Listeria_monocytogenes_serotype_1_2a_str_98-2035_1196178 | Listeria_monocytogenes_1639_v103 | 0.9151 |
| Listeria_monocytogenes_serotype_1_2a_str_95-0093_1196177 | Listeria_monocytogenes_1639_v103 | 0.9206 |
| Listeria_monocytogenes_serotype_1_2a_str_88-0478_1196176 | Listeria_monocytogenes_1639_v103 | 0.9194 |
| Listeria_monocytogenes_serotype_1_2a_str_10-5024_1196192 | Listeria_monocytogenes_1639_v103 | 0.9206 |

|                                                          |                                  |        |
|----------------------------------------------------------|----------------------------------|--------|
| Listeria_monocytogenes_serotype_1_2a_str_10-4758_1196168 | Listeria_monocytogenes_1639_v103 | 0.9387 |
| Listeria_monocytogenes_serotype_1_2a_str_10-4754_1196167 | Listeria_monocytogenes_1639_v103 | 0.939  |
| Listeria_monocytogenes_serotype_1_2a_str_10-1321_1196191 | Listeria_monocytogenes_1639_v103 | 0.9206 |
| Listeria_monocytogenes_serotype_1_2a_str_10-1047_1196190 | Listeria_monocytogenes_1639_v103 | 0.9213 |
| Listeria_monocytogenes_serotype_1_2a_str_10-1046_1196189 | Listeria_monocytogenes_1639_v103 | 0.9213 |
| Listeria_monocytogenes_serotype_1_2a_str_10-0934_1196170 | Listeria_monocytogenes_1639_v103 | 0.9456 |
| Listeria_monocytogenes_serotype_1_2a_str_10-0933_1196169 | Listeria_monocytogenes_1639_v103 | 0.9456 |
| Listeria_monocytogenes_serotype_1_2a_str_10-0815_1196188 | Listeria_monocytogenes_1639_v103 | 0.9165 |
| Listeria_monocytogenes_serotype_1_2a_str_10-0814_1196187 | Listeria_monocytogenes_1639_v103 | 0.921  |
| Listeria_monocytogenes_serotype_1_2a_str_10-0813_1196166 | Listeria_monocytogenes_1639_v103 | 0.9288 |
| Listeria_monocytogenes_serotype_1_2a_str_10-0812_1196165 | Listeria_monocytogenes_1639_v103 | 0.9288 |
| Listeria_monocytogenes_serotype_1_2a_str_08-7669_1196186 | Listeria_monocytogenes_1639_v103 | 0.93   |
| Listeria_monocytogenes_serotype_1_2a_str_08-7374_1196185 | Listeria_monocytogenes_1639_v103 | 0.9206 |
| Listeria_monocytogenes_serotype_1_2a_str_08-6997_1196184 | Listeria_monocytogenes_1639_v103 | 0.9165 |
| Listeria_monocytogenes_serotype_1_2a_str_08-6569_1196183 | Listeria_monocytogenes_1639_v103 | 0.9165 |
| Listeria_monocytogenes_serotype_1_2a_str_08-6056_1196182 | Listeria_monocytogenes_1639_v103 | 0.9165 |
| Listeria_monocytogenes_serotype_1_2a_str_04-5457_1196181 | Listeria_monocytogenes_1639_v103 | 0.9206 |
| Listeria_monocytogenes_serotype_1_2a_str_02-5993_1196180 | Listeria_monocytogenes_1639_v103 | 0.9206 |
| Listeria_monocytogenes_R479a_1437838                     | Listeria_monocytogenes_1639_v103 | 0.9199 |
| Listeria_monocytogenes_N53-1_1234142                     | Listeria_monocytogenes_1639_v103 | 0.8915 |
| Listeria_monocytogenes_M7_1030009                        | Listeria_monocytogenes_1639_v103 | 0.9061 |
| Listeria_monocytogenes_LO28_393132                       | Listeria_monocytogenes_1639_v103 | 0.9247 |
| Listeria_monocytogenes_L99_563174                        | Listeria_monocytogenes_1639_v103 | 0.9065 |
| Listeria_monocytogenes_L312_882094                       | Listeria_monocytogenes_1639_v103 | 0.9723 |
| Listeria_monocytogenes_J1816_930781                      | Listeria_monocytogenes_1639_v103 | 0.9503 |
| Listeria_monocytogenes_J1-220_930782                     | Listeria_monocytogenes_1639_v103 | 0.9783 |
| Listeria_monocytogenes_J0161_393130                      | Listeria_monocytogenes_1639_v103 | 0.9277 |
| Listeria_monocytogenes_HCC23_552536                      | Listeria_monocytogenes_1639_v103 | 0.9058 |
| Listeria_monocytogenes_FSL_R2-561_393126                 | Listeria_monocytogenes_1639_v103 | 0.925  |
| Listeria_monocytogenes_FSL_J1-208_393119                 | Listeria_monocytogenes_1639_v103 | 0.921  |
| Listeria_monocytogenes_FSL_J1-175_393118                 | Listeria_monocytogenes_1639_v103 | 0.9554 |
| Listeria_monocytogenes_Finland_1998_393127               | Listeria_monocytogenes_1639_v103 | 0.9471 |
| Listeria_monocytogenes_EGD-e_169963_v1                   | Listeria_monocytogenes_1639_v103 | 0.9346 |
| Listeria_monocytogenes_EGD-e_169963                      | Listeria_monocytogenes_1639_v103 | 0.935  |
| Listeria_monocytogenes_EGD_1334565                       | Listeria_monocytogenes_1639_v103 | 0.9363 |
| Listeria_monocytogenes_CFSAN002349_1299895               | Listeria_monocytogenes_1639_v103 | 0.972  |
| Listeria_monocytogenes_ATCC_19117_882095_v1              | Listeria_monocytogenes_1639_v103 | 0.9992 |
| Listeria_monocytogenes_ATCC_19117_882095                 | Listeria_monocytogenes_1639_v103 | 0.9989 |
| Listeria_monocytogenes_6179_1288295                      | Listeria_monocytogenes_1639_v103 | 0.9117 |
| Listeria_monocytogenes_1639_v9                           | Listeria_monocytogenes_1639_v103 | 0.926  |
| Listeria_monocytogenes_1639_v99                          | Listeria_monocytogenes_1639_v103 | 0.9507 |
| Listeria_monocytogenes_1639_v98                          | Listeria_monocytogenes_1639_v103 | 0.9254 |
| Listeria_monocytogenes_1639_v97                          | Listeria_monocytogenes_1639_v103 | 0.9659 |
| Listeria_monocytogenes_1639_v96                          | Listeria_monocytogenes_1639_v103 | 0.95   |
| Listeria_monocytogenes_1639_v95                          | Listeria_monocytogenes_1639_v103 | 0.95   |
| Listeria_monocytogenes_1639_v94                          | Listeria_monocytogenes_1639_v103 | 0.9504 |
| Listeria_monocytogenes_1639_v93                          | Listeria_monocytogenes_1639_v103 | 0.9243 |
| Listeria_monocytogenes_1639_v92                          | Listeria_monocytogenes_1639_v103 | 0.9504 |
| Listeria_monocytogenes_1639_v91                          | Listeria_monocytogenes_1639_v103 | 0.9571 |
| Listeria_monocytogenes_1639_v90                          | Listeria_monocytogenes_1639_v103 | 0.9254 |
| Listeria_monocytogenes_1639_v8                           | Listeria_monocytogenes_1639_v103 | 0.9119 |
| Listeria_monocytogenes_1639_v89                          | Listeria_monocytogenes_1639_v103 | 0.9673 |
| Listeria_monocytogenes_1639_v88                          | Listeria_monocytogenes_1639_v103 | 0.9263 |
| Listeria_monocytogenes_1639_v87                          | Listeria_monocytogenes_1639_v103 | 0.9251 |
| Listeria_monocytogenes_1639_v86                          | Listeria_monocytogenes_1639_v103 | 0.9247 |
| Listeria_monocytogenes_1639_v85                          | Listeria_monocytogenes_1639_v103 | 0.9695 |
| Listeria_monocytogenes_1639_v84                          | Listeria_monocytogenes_1639_v103 | 0.9318 |
| Listeria_monocytogenes_1639_v83                          | Listeria_monocytogenes_1639_v103 | 0.9875 |
| Listeria_monocytogenes_1639_v82                          | Listeria_monocytogenes_1639_v103 | 0.9868 |
| Listeria_monocytogenes_1639_v81                          | Listeria_monocytogenes_1639_v103 | 0.9278 |
| Listeria_monocytogenes_1639_v80                          | Listeria_monocytogenes_1639_v103 | 0.9451 |
| Listeria_monocytogenes_1639_v7                           | Listeria_monocytogenes_1639_v103 | 0.9119 |
| Listeria_monocytogenes_1639_v79                          | Listeria_monocytogenes_1639_v103 | 0.926  |
| Listeria_monocytogenes_1639_v78                          | Listeria_monocytogenes_1639_v103 | 0.9271 |
| Listeria_monocytogenes_1639_v77                          | Listeria_monocytogenes_1639_v103 | 0.9313 |
| Listeria_monocytogenes_1639_v76                          | Listeria_monocytogenes_1639_v103 | 0.9227 |
| Listeria_monocytogenes_1639_v75                          | Listeria_monocytogenes_1639_v103 | 0.9065 |
| Listeria_monocytogenes_1639_v74                          | Listeria_monocytogenes_1639_v103 | 0.9236 |
| Listeria_monocytogenes_1639_v73                          | Listeria_monocytogenes_1639_v103 | 0.9202 |
| Listeria_monocytogenes_1639_v72                          | Listeria_monocytogenes_1639_v103 | 0.986  |
| Listeria_monocytogenes_1639_v71                          | Listeria_monocytogenes_1639_v103 | 0.9118 |
| Listeria_monocytogenes_1639_v70                          | Listeria_monocytogenes_1639_v103 | 0.9223 |
| Listeria_monocytogenes_1639_v6                           | Listeria_monocytogenes_1639_v103 | 0.9116 |
| Listeria_monocytogenes_1639_v69                          | Listeria_monocytogenes_1639_v103 | 0.9713 |
| Listeria_monocytogenes_1639_v68                          | Listeria_monocytogenes_1639_v103 | 0.9414 |
| Listeria_monocytogenes_1639_v67                          | Listeria_monocytogenes_1639_v103 | 0.9448 |
| Listeria_monocytogenes_1639_v66                          | Listeria_monocytogenes_1639_v103 | 0.9327 |
| Listeria_monocytogenes_1639_v65                          | Listeria_monocytogenes_1639_v103 | 0.9234 |
| Listeria_monocytogenes_1639_v64                          | Listeria_monocytogenes_1639_v103 | 0.9268 |
| Listeria_monocytogenes_1639_v63                          | Listeria_monocytogenes_1639_v103 | 0.9402 |
| Listeria_monocytogenes_1639_v62                          | Listeria_monocytogenes_1639_v103 | 0.9232 |
| Listeria_monocytogenes_1639_v61                          | Listeria_monocytogenes_1639_v103 | 0.9233 |
| Listeria_monocytogenes_1639_v60                          | Listeria_monocytogenes_1639_v103 | 0.9297 |
| Listeria_monocytogenes_1639_v5                           | Listeria_monocytogenes_1639_v103 | 0.9064 |
| Listeria_monocytogenes_1639_v59                          | Listeria_monocytogenes_1639_v103 | 0.9879 |
| Listeria_monocytogenes_1639_v58                          | Listeria_monocytogenes_1639_v103 | 0.9769 |
| Listeria_monocytogenes_1639_v57                          | Listeria_monocytogenes_1639_v103 | 0.9472 |
| Listeria_monocytogenes_1639_v56                          | Listeria_monocytogenes_1639_v103 | 0.9879 |
| Listeria_monocytogenes_1639_v55                          | Listeria_monocytogenes_1639_v103 | 0.943  |
| Listeria_monocytogenes_1639_v54                          | Listeria_monocytogenes_1639_v103 | 0.9257 |
| Listeria_monocytogenes_1639_v53                          | Listeria_monocytogenes_1639_v103 | 0.93   |

[illegible]

|                                                          |                                  |        |
|----------------------------------------------------------|----------------------------------|--------|
| Listeria_monocytogenes_1639_v14                          | Listeria_monocytogenes_1639_v103 | 0.9323 |
| Listeria_monocytogenes_1639_v149                         | Listeria_monocytogenes_1639_v103 | 0.9366 |
| Listeria_monocytogenes_1639_v148                         | Listeria_monocytogenes_1639_v103 | 0.969  |
| Listeria_monocytogenes_1639_v147                         | Listeria_monocytogenes_1639_v103 | 0.9554 |
| Listeria_monocytogenes_1639_v146                         | Listeria_monocytogenes_1639_v103 | 0.9468 |
| Listeria_monocytogenes_1639_v145                         | Listeria_monocytogenes_1639_v103 | 0.9435 |
| Listeria_monocytogenes_1639_v144                         | Listeria_monocytogenes_1639_v103 | 0.9715 |
| Listeria_monocytogenes_1639_v143                         | Listeria_monocytogenes_1639_v103 | 0.9473 |
| Listeria_monocytogenes_1639_v142                         | Listeria_monocytogenes_1639_v103 | 0.9719 |
| Listeria_monocytogenes_1639_v141                         | Listeria_monocytogenes_1639_v103 | 0.9642 |
| Listeria_monocytogenes_1639_v140                         | Listeria_monocytogenes_1639_v103 | 0.9727 |
| Listeria_monocytogenes_1639_v13                          | Listeria_monocytogenes_1639_v103 | 0.9247 |
| Listeria_monocytogenes_1639_v139                         | Listeria_monocytogenes_1639_v103 | 0.9727 |
| Listeria_monocytogenes_1639_v138                         | Listeria_monocytogenes_1639_v103 | 0.9742 |
| Listeria_monocytogenes_1639_v137                         | Listeria_monocytogenes_1639_v103 | 0.9742 |
| Listeria_monocytogenes_1639_v136                         | Listeria_monocytogenes_1639_v103 | 0.9383 |
| Listeria_monocytogenes_1639_v135                         | Listeria_monocytogenes_1639_v103 | 0.9204 |
| Listeria_monocytogenes_1639_v134                         | Listeria_monocytogenes_1639_v103 | 0.9805 |
| Listeria_monocytogenes_1639_v133                         | Listeria_monocytogenes_1639_v103 | 0.9354 |
| Listeria_monocytogenes_1639_v132                         | Listeria_monocytogenes_1639_v103 | 0.9208 |
| Listeria_monocytogenes_1639_v131                         | Listeria_monocytogenes_1639_v103 | 0.9578 |
| Listeria_monocytogenes_1639_v130                         | Listeria_monocytogenes_1639_v103 | 0.9261 |
| Listeria_monocytogenes_1639_v12                          | Listeria_monocytogenes_1639_v103 | 0.9071 |
| Listeria_monocytogenes_1639_v129                         | Listeria_monocytogenes_1639_v103 | 0.9642 |
| Listeria_monocytogenes_1639_v128                         | Listeria_monocytogenes_1639_v103 | 0.962  |
| Listeria_monocytogenes_1639_v127                         | Listeria_monocytogenes_1639_v103 | 0.9346 |
| Listeria_monocytogenes_1639_v126                         | Listeria_monocytogenes_1639_v103 | 0.9601 |
| Listeria_monocytogenes_1639_v125                         | Listeria_monocytogenes_1639_v103 | 0.9343 |
| Listeria_monocytogenes_1639_v124                         | Listeria_monocytogenes_1639_v103 | 0.9435 |
| Listeria_monocytogenes_1639_v123                         | Listeria_monocytogenes_1639_v103 | 0.972  |
| Listeria_monocytogenes_1639_v122                         | Listeria_monocytogenes_1639_v103 | 0.972  |
| Listeria_monocytogenes_1639_v121                         | Listeria_monocytogenes_1639_v103 | 0.972  |
| Listeria_monocytogenes_1639_v120                         | Listeria_monocytogenes_1639_v103 | 0.972  |
| Listeria_monocytogenes_1639_v11                          | Listeria_monocytogenes_1639_v103 | 0.9084 |
| Listeria_monocytogenes_1639_v119                         | Listeria_monocytogenes_1639_v103 | 0.972  |
| Listeria_monocytogenes_1639_v118                         | Listeria_monocytogenes_1639_v103 | 0.972  |
| Listeria_monocytogenes_1639_v117                         | Listeria_monocytogenes_1639_v103 | 0.9368 |
| Listeria_monocytogenes_1639_v116                         | Listeria_monocytogenes_1639_v103 | 0.9817 |
| Listeria_monocytogenes_1639_v115                         | Listeria_monocytogenes_1639_v103 | 0.9813 |
| Listeria_monocytogenes_1639_v114                         | Listeria_monocytogenes_1639_v103 | 0.9299 |
| Listeria_monocytogenes_1639_v113                         | Listeria_monocytogenes_1639_v103 | 0.9549 |
| Listeria_monocytogenes_1639_v112                         | Listeria_monocytogenes_1639_v103 | 0.9654 |
| Listeria_monocytogenes_1639_v111                         | Listeria_monocytogenes_1639_v103 | 0.9465 |
| Listeria_monocytogenes_1639_v110                         | Listeria_monocytogenes_1639_v103 | 0.9296 |
| Listeria_monocytogenes_1639_v10                          | Listeria_monocytogenes_1639_v103 | 0.923  |
| Listeria_monocytogenes_1639_v109                         | Listeria_monocytogenes_1639_v103 | 0.9292 |
| Listeria_monocytogenes_1639_v108                         | Listeria_monocytogenes_1639_v103 | 0.9591 |
| Listeria_monocytogenes_1639_v107                         | Listeria_monocytogenes_1639_v103 | 0.9985 |
| Listeria_monocytogenes_1639_v106                         | Listeria_monocytogenes_1639_v103 | 0.9996 |
| Listeria_monocytogenes_1639_v105                         | Listeria_monocytogenes_1639_v103 | 0.9996 |
| Listeria_monocytogenes_1639_v104                         | Listeria_monocytogenes_1639_v103 | 0.9996 |
| Listeria_monocytogenes_1639_v103                         | Listeria_monocytogenes_1639_v103 | 0.0685 |
| Listeria_welshimeri_1643                                 | Listeria_monocytogenes_1639_v104 | 0.8904 |
| Listeria_welshimeri_serovar_6b_str_SLCC5334_386043       | Listeria_monocytogenes_1639_v104 | 0.8897 |
| Listeria_seeligeri_serovar_1_2b_str_SLCC3954_683837      | Listeria_monocytogenes_1639_v104 | 0.8869 |
| Listeria_seeligeri_FSL_S4-171_702452                     | Listeria_monocytogenes_1639_v104 | 0.8276 |
| Listeria_seeligeri_FSL_N1-067_702453                     | Listeria_monocytogenes_1639_v104 | 0.8293 |
| Listeria_seeligeri_1640_v1                               | Listeria_monocytogenes_1639_v104 | 0.8937 |
| Listeria_seeligeri_1640                                  | Listeria_monocytogenes_1639_v104 | 0.8807 |
| Listeria_monocytogenes_WSLC1042_1457188                  | Listeria_monocytogenes_1639_v104 | 0.9798 |
| Listeria_monocytogenes_WSLC1001_1457187                  | Listeria_monocytogenes_1639_v104 | 0.9313 |
| Listeria_monocytogenes_SLCC7179_879090                   | Listeria_monocytogenes_1639_v104 | 0.9379 |
| Listeria_monocytogenes_SLCC5850_882096                   | Listeria_monocytogenes_1639_v104 | 0.9355 |
| Listeria_monocytogenes_SLCC2755_932919                   | Listeria_monocytogenes_1639_v104 | 0.9448 |
| Listeria_monocytogenes_SLCC2540_879089                   | Listeria_monocytogenes_1639_v104 | 0.948  |
| Listeria_monocytogenes_SLCC2479_882020                   | Listeria_monocytogenes_1639_v104 | 0.9257 |
| Listeria_monocytogenes_SLCC2378_879088                   | Listeria_monocytogenes_1639_v104 | 0.9817 |
| Listeria_monocytogenes_SLCC2376_882097                   | Listeria_monocytogenes_1639_v104 | 0.9409 |
| Listeria_monocytogenes_SLCC2372_932920                   | Listeria_monocytogenes_1639_v104 | 0.9185 |
| Listeria_monocytogenes_serotype_4b_str_LL195_1230340     | Listeria_monocytogenes_1639_v104 | 0.9766 |
| Listeria_monocytogenes_serotype_4b_str_LIS0087_1134669   | Listeria_monocytogenes_1639_v104 | 0.9119 |
| Listeria_monocytogenes_serotype_4b_str_F2365_265669      | Listeria_monocytogenes_1639_v104 | 0.9766 |
| Listeria_monocytogenes_serotype_4b_str_CLIP_80459_568819 | Listeria_monocytogenes_1639_v104 | 0.9719 |
| Listeria_monocytogenes_serotype_4b_str_81-0861_1196161   | Listeria_monocytogenes_1639_v104 | 0.9698 |
| Listeria_monocytogenes_serotype_4b_str_81-0592_1196160   | Listeria_monocytogenes_1639_v104 | 0.9709 |
| Listeria_monocytogenes_serotype_4b_str_81-0558_1196159   | Listeria_monocytogenes_1639_v104 | 0.9705 |
| Listeria_monocytogenes_serotype_4b_str_10-0809_1196162   | Listeria_monocytogenes_1639_v104 | 0.9709 |
| Listeria_monocytogenes_serotype_4b_str_02-6680_1196175   | Listeria_monocytogenes_1639_v104 | 0.9781 |
| Listeria_monocytogenes_serotype_4b_str_02-6679_1196174   | Listeria_monocytogenes_1639_v104 | 0.9781 |
| Listeria_monocytogenes_serotype_4b_str_02-1792_1196173   | Listeria_monocytogenes_1639_v104 | 0.9705 |
| Listeria_monocytogenes_serotype_4b_str_02-1289_1196172   | Listeria_monocytogenes_1639_v104 | 0.9705 |
| Listeria_monocytogenes_serotype_4b_str_02-1103_1196171   | Listeria_monocytogenes_1639_v104 | 0.9705 |
| Listeria_monocytogenes_serotype_3c_str_10-5027_1196195   | Listeria_monocytogenes_1639_v104 | 0.925  |
| Listeria_monocytogenes_serotype_1_2c_str_10-5026_1196194 | Listeria_monocytogenes_1639_v104 | 0.9261 |
| Listeria_monocytogenes_serotype_1_2c_str_10-5025_1196193 | Listeria_monocytogenes_1639_v104 | 0.9261 |
| Listeria_monocytogenes_serotype_1_2b_str_10-0811_1196164 | Listeria_monocytogenes_1639_v104 | 0.9384 |
| Listeria_monocytogenes_serotype_1_2b_str_10-0810_1196163 | Listeria_monocytogenes_1639_v104 | 0.9384 |
| Listeria_monocytogenes_serotype_1_2a_str_99-6370_1196179 | Listeria_monocytogenes_1639_v104 | 0.9148 |
| Listeria_monocytogenes_serotype_1_2a_str_98-2035_1196178 | Listeria_monocytogenes_1639_v104 | 0.9148 |
| Listeria_monocytogenes_serotype_1_2a_str_95-0093_1196177 | Listeria_monocytogenes_1639_v104 | 0.9203 |
| Listeria_monocytogenes_serotype_1_2a_str_88-0478_1196176 | Listeria_monocytogenes_1639_v104 | 0.9194 |



|                                                          |                                  |        |
|----------------------------------------------------------|----------------------------------|--------|
| Listeria_monocytogenes_serotype_1_2a_str_10-5024_1196192 | Listeria_monocytogenes_1639_v104 | 0.9206 |
| Listeria_monocytogenes_serotype_1_2a_str_10-4758_1196168 | Listeria_monocytogenes_1639_v104 | 0.9387 |
| Listeria_monocytogenes_serotype_1_2a_str_10-4754_1196167 | Listeria_monocytogenes_1639_v104 | 0.9387 |
| Listeria_monocytogenes_serotype_1_2a_str_10-1321_1196191 | Listeria_monocytogenes_1639_v104 | 0.9206 |
| Listeria_monocytogenes_serotype_1_2a_str_10-1047_1196190 | Listeria_monocytogenes_1639_v104 | 0.9209 |
| Listeria_monocytogenes_serotype_1_2a_str_10-1046_1196189 | Listeria_monocytogenes_1639_v104 | 0.9209 |
| Listeria_monocytogenes_serotype_1_2a_str_10-0934_1196170 | Listeria_monocytogenes_1639_v104 | 0.9452 |
| Listeria_monocytogenes_serotype_1_2a_str_10-0933_1196169 | Listeria_monocytogenes_1639_v104 | 0.9452 |
| Listeria_monocytogenes_serotype_1_2a_str_10-0815_1196188 | Listeria_monocytogenes_1639_v104 | 0.9162 |
| Listeria_monocytogenes_serotype_1_2a_str_10-0814_1196187 | Listeria_monocytogenes_1639_v104 | 0.9206 |
| Listeria_monocytogenes_serotype_1_2a_str_10-0813_1196166 | Listeria_monocytogenes_1639_v104 | 0.9285 |
| Listeria_monocytogenes_serotype_1_2a_str_10-0812_1196165 | Listeria_monocytogenes_1639_v104 | 0.9285 |
| Listeria_monocytogenes_serotype_1_2a_str_08-7669_1196186 | Listeria_monocytogenes_1639_v104 | 0.9296 |
| Listeria_monocytogenes_serotype_1_2a_str_08-7374_1196185 | Listeria_monocytogenes_1639_v104 | 0.9206 |
| Listeria_monocytogenes_serotype_1_2a_str_08-6997_1196184 | Listeria_monocytogenes_1639_v104 | 0.9162 |
| Listeria_monocytogenes_serotype_1_2a_str_08-6569_1196183 | Listeria_monocytogenes_1639_v104 | 0.9162 |
| Listeria_monocytogenes_serotype_1_2a_str_08-6056_1196182 | Listeria_monocytogenes_1639_v104 | 0.9162 |
| Listeria_monocytogenes_serotype_1_2a_str_04-5457_1196181 | Listeria_monocytogenes_1639_v104 | 0.9206 |
| Listeria_monocytogenes_serotype_1_2a_str_02-5993_1196180 | Listeria_monocytogenes_1639_v104 | 0.9203 |
| Listeria_monocytogenes_R479a_1437838                     | Listeria_monocytogenes_1639_v104 | 0.9196 |
| Listeria_monocytogenes_N53-1_1234142                     | Listeria_monocytogenes_1639_v104 | 0.8912 |
| Listeria_monocytogenes_M7_1030009                        | Listeria_monocytogenes_1639_v104 | 0.9058 |
| Listeria_monocytogenes_LO28_393132                       | Listeria_monocytogenes_1639_v104 | 0.9244 |
| Listeria_monocytogenes_L99_563174                        | Listeria_monocytogenes_1639_v104 | 0.9065 |
| Listeria_monocytogenes_L312_882094                       | Listeria_monocytogenes_1639_v104 | 0.9723 |
| Listeria_monocytogenes_J1816_930781                      | Listeria_monocytogenes_1639_v104 | 0.9503 |
| Listeria_monocytogenes_J1-220_930782                     | Listeria_monocytogenes_1639_v104 | 0.9779 |
| Listeria_monocytogenes_J0161_393130                      | Listeria_monocytogenes_1639_v104 | 0.9277 |
| Listeria_monocytogenes_HCC23_552536                      | Listeria_monocytogenes_1639_v104 | 0.9058 |
| Listeria_monocytogenes_FSL_R2-561_393126                 | Listeria_monocytogenes_1639_v104 | 0.9247 |
| Listeria_monocytogenes_FSL_J1-208_393119                 | Listeria_monocytogenes_1639_v104 | 0.9206 |
| Listeria_monocytogenes_FSL_J1-175_393118                 | Listeria_monocytogenes_1639_v104 | 0.955  |
| Listeria_monocytogenes_Finland_1998_393127               | Listeria_monocytogenes_1639_v104 | 0.9467 |
| Listeria_monocytogenes_EGD-e_169963_v1                   | Listeria_monocytogenes_1639_v104 | 0.9342 |
| Listeria_monocytogenes_EGD-e_169963                      | Listeria_monocytogenes_1639_v104 | 0.9346 |
| Listeria_monocytogenes_EGD_1334565                       | Listeria_monocytogenes_1639_v104 | 0.9363 |
| Listeria_monocytogenes_CFSAN002349_1299895               | Listeria_monocytogenes_1639_v104 | 0.9716 |
| Listeria_monocytogenes_ATCC_19117_882095_v1              | Listeria_monocytogenes_1639_v104 | 0.9989 |
| Listeria_monocytogenes_ATCC_19117_882095                 | Listeria_monocytogenes_1639_v104 | 0.9989 |
| Listeria_monocytogenes_6179_1288295                      | Listeria_monocytogenes_1639_v104 | 0.9117 |
| Listeria_monocytogenes_1639_v9                           | Listeria_monocytogenes_1639_v104 | 0.9256 |
| Listeria_monocytogenes_1639_v99                          | Listeria_monocytogenes_1639_v104 | 0.9507 |
| Listeria_monocytogenes_1639_v98                          | Listeria_monocytogenes_1639_v104 | 0.9254 |
| Listeria_monocytogenes_1639_v97                          | Listeria_monocytogenes_1639_v104 | 0.9655 |
| Listeria_monocytogenes_1639_v96                          | Listeria_monocytogenes_1639_v104 | 0.95   |
| Listeria_monocytogenes_1639_v95                          | Listeria_monocytogenes_1639_v104 | 0.95   |
| Listeria_monocytogenes_1639_v94                          | Listeria_monocytogenes_1639_v104 | 0.95   |
| Listeria_monocytogenes_1639_v93                          | Listeria_monocytogenes_1639_v104 | 0.9243 |
| Listeria_monocytogenes_1639_v92                          | Listeria_monocytogenes_1639_v104 | 0.9504 |
| Listeria_monocytogenes_1639_v91                          | Listeria_monocytogenes_1639_v104 | 0.9571 |
| Listeria_monocytogenes_1639_v90                          | Listeria_monocytogenes_1639_v104 | 0.9254 |
| Listeria_monocytogenes_1639_v8                           | Listeria_monocytogenes_1639_v104 | 0.9119 |
| Listeria_monocytogenes_1639_v89                          | Listeria_monocytogenes_1639_v104 | 0.9669 |
| Listeria_monocytogenes_1639_v88                          | Listeria_monocytogenes_1639_v104 | 0.9263 |
| Listeria_monocytogenes_1639_v87                          | Listeria_monocytogenes_1639_v104 | 0.9251 |
| Listeria_monocytogenes_1639_v86                          | Listeria_monocytogenes_1639_v104 | 0.9244 |
| Listeria_monocytogenes_1639_v85                          | Listeria_monocytogenes_1639_v104 | 0.9691 |
| Listeria_monocytogenes_1639_v84                          | Listeria_monocytogenes_1639_v104 | 0.9318 |
| Listeria_monocytogenes_1639_v83                          | Listeria_monocytogenes_1639_v104 | 0.9871 |
| Listeria_monocytogenes_1639_v82                          | Listeria_monocytogenes_1639_v104 | 0.9864 |
| Listeria_monocytogenes_1639_v81                          | Listeria_monocytogenes_1639_v104 | 0.9278 |
| Listeria_monocytogenes_1639_v80                          | Listeria_monocytogenes_1639_v104 | 0.9451 |
| Listeria_monocytogenes_1639_v7                           | Listeria_monocytogenes_1639_v104 | 0.9119 |
| Listeria_monocytogenes_1639_v79                          | Listeria_monocytogenes_1639_v104 | 0.9257 |
| Listeria_monocytogenes_1639_v78                          | Listeria_monocytogenes_1639_v104 | 0.9271 |
| Listeria_monocytogenes_1639_v77                          | Listeria_monocytogenes_1639_v104 | 0.931  |
| Listeria_monocytogenes_1639_v76                          | Listeria_monocytogenes_1639_v104 | 0.9224 |
| Listeria_monocytogenes_1639_v75                          | Listeria_monocytogenes_1639_v104 | 0.9065 |
| Listeria_monocytogenes_1639_v74                          | Listeria_monocytogenes_1639_v104 | 0.9232 |
| Listeria_monocytogenes_1639_v73                          | Listeria_monocytogenes_1639_v104 | 0.9199 |
| Listeria_monocytogenes_1639_v72                          | Listeria_monocytogenes_1639_v104 | 0.986  |
| Listeria_monocytogenes_1639_v71                          | Listeria_monocytogenes_1639_v104 | 0.9115 |
| Listeria_monocytogenes_1639_v70                          | Listeria_monocytogenes_1639_v104 | 0.9223 |
| Listeria_monocytogenes_1639_v6                           | Listeria_monocytogenes_1639_v104 | 0.9113 |
| Listeria_monocytogenes_1639_v69                          | Listeria_monocytogenes_1639_v104 | 0.9713 |
| Listeria_monocytogenes_1639_v68                          | Listeria_monocytogenes_1639_v104 | 0.9414 |
| Listeria_monocytogenes_1639_v67                          | Listeria_monocytogenes_1639_v104 | 0.9448 |
| Listeria_monocytogenes_1639_v66                          | Listeria_monocytogenes_1639_v104 | 0.9327 |
| Listeria_monocytogenes_1639_v65                          | Listeria_monocytogenes_1639_v104 | 0.9234 |
| Listeria_monocytogenes_1639_v64                          | Listeria_monocytogenes_1639_v104 | 0.9268 |
| Listeria_monocytogenes_1639_v63                          | Listeria_monocytogenes_1639_v104 | 0.9399 |
| Listeria_monocytogenes_1639_v62                          | Listeria_monocytogenes_1639_v104 | 0.9232 |
| Listeria_monocytogenes_1639_v61                          | Listeria_monocytogenes_1639_v104 | 0.9233 |
| Listeria_monocytogenes_1639_v60                          | Listeria_monocytogenes_1639_v104 | 0.9297 |
| Listeria_monocytogenes_1639_v5                           | Listeria_monocytogenes_1639_v104 | 0.9064 |
| Listeria_monocytogenes_1639_v59                          | Listeria_monocytogenes_1639_v104 | 0.9879 |
| Listeria_monocytogenes_1639_v58                          | Listeria_monocytogenes_1639_v104 | 0.9765 |
| Listeria_monocytogenes_1639_v57                          | Listeria_monocytogenes_1639_v104 | 0.9472 |
| Listeria_monocytogenes_1639_v56                          | Listeria_monocytogenes_1639_v104 | 0.9875 |
| Listeria_monocytogenes_1639_v55                          | Listeria_monocytogenes_1639_v104 | 0.943  |
| Listeria_monocytogenes_1639_v54                          | Listeria_monocytogenes_1639_v104 | 0.9253 |

[illegible]



|                                                          |                                  |        |
|----------------------------------------------------------|----------------------------------|--------|
| Listeria_monocytogenes_serotype_1_2a_str_10-5024_1196192 | Listeria_monocytogenes_1639_v105 | 0.9203 |
| Listeria_monocytogenes_serotype_1_2a_str_10-4758_1196168 | Listeria_monocytogenes_1639_v105 | 0.9383 |
| Listeria_monocytogenes_serotype_1_2a_str_10-4754_1196167 | Listeria_monocytogenes_1639_v105 | 0.9387 |
| Listeria_monocytogenes_serotype_1_2a_str_10-1321_1196191 | Listeria_monocytogenes_1639_v105 | 0.9203 |
| Listeria_monocytogenes_serotype_1_2a_str_10-1047_1196190 | Listeria_monocytogenes_1639_v105 | 0.9209 |
| Listeria_monocytogenes_serotype_1_2a_str_10-1046_1196189 | Listeria_monocytogenes_1639_v105 | 0.9209 |
| Listeria_monocytogenes_serotype_1_2a_str_10-0934_1196170 | Listeria_monocytogenes_1639_v105 | 0.9452 |
| Listeria_monocytogenes_serotype_1_2a_str_10-0933_1196169 | Listeria_monocytogenes_1639_v105 | 0.9452 |
| Listeria_monocytogenes_serotype_1_2a_str_10-0815_1196188 | Listeria_monocytogenes_1639_v105 | 0.9162 |
| Listeria_monocytogenes_serotype_1_2a_str_10-0814_1196187 | Listeria_monocytogenes_1639_v105 | 0.9206 |
| Listeria_monocytogenes_serotype_1_2a_str_10-0813_1196166 | Listeria_monocytogenes_1639_v105 | 0.9285 |
| Listeria_monocytogenes_serotype_1_2a_str_10-0812_1196165 | Listeria_monocytogenes_1639_v105 | 0.9285 |
| Listeria_monocytogenes_serotype_1_2a_str_08-7669_1196186 | Listeria_monocytogenes_1639_v105 | 0.9296 |
| Listeria_monocytogenes_serotype_1_2a_str_08-7374_1196185 | Listeria_monocytogenes_1639_v105 | 0.9203 |
| Listeria_monocytogenes_serotype_1_2a_str_08-6997_1196184 | Listeria_monocytogenes_1639_v105 | 0.9162 |
| Listeria_monocytogenes_serotype_1_2a_str_08-6569_1196183 | Listeria_monocytogenes_1639_v105 | 0.9162 |
| Listeria_monocytogenes_serotype_1_2a_str_08-6056_1196182 | Listeria_monocytogenes_1639_v105 | 0.9162 |
| Listeria_monocytogenes_serotype_1_2a_str_04-5457_1196181 | Listeria_monocytogenes_1639_v105 | 0.9203 |
| Listeria_monocytogenes_serotype_1_2a_str_02-5993_1196180 | Listeria_monocytogenes_1639_v105 | 0.9203 |
| Listeria_monocytogenes_R479a_1437838                     | Listeria_monocytogenes_1639_v105 | 0.9196 |
| Listeria_monocytogenes_N53-1_1234142                     | Listeria_monocytogenes_1639_v105 | 0.8912 |
| Listeria_monocytogenes_M7_1030009                        | Listeria_monocytogenes_1639_v105 | 0.9058 |
| Listeria_monocytogenes_LO28_393132                       | Listeria_monocytogenes_1639_v105 | 0.9244 |
| Listeria_monocytogenes_L99_563174                        | Listeria_monocytogenes_1639_v105 | 0.9061 |
| Listeria_monocytogenes_L312_882094                       | Listeria_monocytogenes_1639_v105 | 0.9719 |
| Listeria_monocytogenes_J1816_930781                      | Listeria_monocytogenes_1639_v105 | 0.9504 |
| Listeria_monocytogenes_J1-220_930782                     | Listeria_monocytogenes_1639_v105 | 0.9779 |
| Listeria_monocytogenes_J0161_393130                      | Listeria_monocytogenes_1639_v105 | 0.9274 |
| Listeria_monocytogenes_HCC23_552536                      | Listeria_monocytogenes_1639_v105 | 0.9054 |
| Listeria_monocytogenes_FSL_R2-561_393126                 | Listeria_monocytogenes_1639_v105 | 0.9247 |
| Listeria_monocytogenes_FSL_J1-208_393119                 | Listeria_monocytogenes_1639_v105 | 0.9206 |
| Listeria_monocytogenes_FSL_J1-175_393118                 | Listeria_monocytogenes_1639_v105 | 0.955  |
| Listeria_monocytogenes_Finland_1998_393127               | Listeria_monocytogenes_1639_v105 | 0.9471 |
| Listeria_monocytogenes_EGD-e_169963_v1                   | Listeria_monocytogenes_1639_v105 | 0.9342 |
| Listeria_monocytogenes_EGD-e_169963                      | Listeria_monocytogenes_1639_v105 | 0.9346 |
| Listeria_monocytogenes_EGD_1334565                       | Listeria_monocytogenes_1639_v105 | 0.9359 |
| Listeria_monocytogenes_CFSAN002349_1299895               | Listeria_monocytogenes_1639_v105 | 0.9716 |
| Listeria_monocytogenes_ATCC_19117_882095_v1              | Listeria_monocytogenes_1639_v105 | 0.9989 |
| Listeria_monocytogenes_ATCC_19117_882095                 | Listeria_monocytogenes_1639_v105 | 0.9985 |
| Listeria_monocytogenes_6179_1288295                      | Listeria_monocytogenes_1639_v105 | 0.9113 |
| Listeria_monocytogenes_1639_v9                           | Listeria_monocytogenes_1639_v105 | 0.926  |
| Listeria_monocytogenes_1639_v99                          | Listeria_monocytogenes_1639_v105 | 0.9504 |
| Listeria_monocytogenes_1639_v98                          | Listeria_monocytogenes_1639_v105 | 0.9254 |
| Listeria_monocytogenes_1639_v97                          | Listeria_monocytogenes_1639_v105 | 0.9655 |
| Listeria_monocytogenes_1639_v96                          | Listeria_monocytogenes_1639_v105 | 0.9497 |
| Listeria_monocytogenes_1639_v95                          | Listeria_monocytogenes_1639_v105 | 0.9497 |
| Listeria_monocytogenes_1639_v94                          | Listeria_monocytogenes_1639_v105 | 0.95   |
| Listeria_monocytogenes_1639_v93                          | Listeria_monocytogenes_1639_v105 | 0.9239 |
| Listeria_monocytogenes_1639_v92                          | Listeria_monocytogenes_1639_v105 | 0.95   |
| Listeria_monocytogenes_1639_v91                          | Listeria_monocytogenes_1639_v105 | 0.9567 |
| Listeria_monocytogenes_1639_v90                          | Listeria_monocytogenes_1639_v105 | 0.9254 |
| Listeria_monocytogenes_1639_v8                           | Listeria_monocytogenes_1639_v105 | 0.9116 |
| Listeria_monocytogenes_1639_v89                          | Listeria_monocytogenes_1639_v105 | 0.9669 |
| Listeria_monocytogenes_1639_v88                          | Listeria_monocytogenes_1639_v105 | 0.926  |
| Listeria_monocytogenes_1639_v87                          | Listeria_monocytogenes_1639_v105 | 0.9247 |
| Listeria_monocytogenes_1639_v86                          | Listeria_monocytogenes_1639_v105 | 0.9244 |
| Listeria_monocytogenes_1639_v85                          | Listeria_monocytogenes_1639_v105 | 0.9695 |
| Listeria_monocytogenes_1639_v84                          | Listeria_monocytogenes_1639_v105 | 0.9314 |
| Listeria_monocytogenes_1639_v83                          | Listeria_monocytogenes_1639_v105 | 0.9871 |
| Listeria_monocytogenes_1639_v82                          | Listeria_monocytogenes_1639_v105 | 0.9868 |
| Listeria_monocytogenes_1639_v81                          | Listeria_monocytogenes_1639_v105 | 0.9278 |
| Listeria_monocytogenes_1639_v80                          | Listeria_monocytogenes_1639_v105 | 0.9447 |
| Listeria_monocytogenes_1639_v7                           | Listeria_monocytogenes_1639_v105 | 0.9116 |
| Listeria_monocytogenes_1639_v79                          | Listeria_monocytogenes_1639_v105 | 0.9261 |
| Listeria_monocytogenes_1639_v78                          | Listeria_monocytogenes_1639_v105 | 0.9271 |
| Listeria_monocytogenes_1639_v77                          | Listeria_monocytogenes_1639_v105 | 0.931  |
| Listeria_monocytogenes_1639_v76                          | Listeria_monocytogenes_1639_v105 | 0.9224 |
| Listeria_monocytogenes_1639_v75                          | Listeria_monocytogenes_1639_v105 | 0.9061 |
| Listeria_monocytogenes_1639_v74                          | Listeria_monocytogenes_1639_v105 | 0.9232 |
| Listeria_monocytogenes_1639_v73                          | Listeria_monocytogenes_1639_v105 | 0.9199 |
| Listeria_monocytogenes_1639_v72                          | Listeria_monocytogenes_1639_v105 | 0.9856 |
| Listeria_monocytogenes_1639_v71                          | Listeria_monocytogenes_1639_v105 | 0.9115 |
| Listeria_monocytogenes_1639_v70                          | Listeria_monocytogenes_1639_v105 | 0.9219 |
| Listeria_monocytogenes_1639_v6                           | Listeria_monocytogenes_1639_v105 | 0.9113 |
| Listeria_monocytogenes_1639_v69                          | Listeria_monocytogenes_1639_v105 | 0.9709 |
| Listeria_monocytogenes_1639_v68                          | Listeria_monocytogenes_1639_v105 | 0.941  |
| Listeria_monocytogenes_1639_v67                          | Listeria_monocytogenes_1639_v105 | 0.9444 |
| Listeria_monocytogenes_1639_v66                          | Listeria_monocytogenes_1639_v105 | 0.9323 |
| Listeria_monocytogenes_1639_v65                          | Listeria_monocytogenes_1639_v105 | 0.923  |
| Listeria_monocytogenes_1639_v64                          | Listeria_monocytogenes_1639_v105 | 0.9264 |
| Listeria_monocytogenes_1639_v63                          | Listeria_monocytogenes_1639_v105 | 0.9399 |
| Listeria_monocytogenes_1639_v62                          | Listeria_monocytogenes_1639_v105 | 0.9233 |
| Listeria_monocytogenes_1639_v61                          | Listeria_monocytogenes_1639_v105 | 0.923  |
| Listeria_monocytogenes_1639_v60                          | Listeria_monocytogenes_1639_v105 | 0.9293 |
| Listeria_monocytogenes_1639_v5                           | Listeria_monocytogenes_1639_v105 | 0.9061 |
| Listeria_monocytogenes_1639_v59                          | Listeria_monocytogenes_1639_v105 | 0.9875 |
| Listeria_monocytogenes_1639_v58                          | Listeria_monocytogenes_1639_v105 | 0.9765 |
| Listeria_monocytogenes_1639_v57                          | Listeria_monocytogenes_1639_v105 | 0.9469 |
| Listeria_monocytogenes_1639_v56                          | Listeria_monocytogenes_1639_v105 | 0.9875 |
| Listeria_monocytogenes_1639_v55                          | Listeria_monocytogenes_1639_v105 | 0.9426 |
| Listeria_monocytogenes_1639_v54                          | Listeria_monocytogenes_1639_v105 | 0.9253 |

[illegible]

|                                                          |                                  |        |
|----------------------------------------------------------|----------------------------------|--------|
| Listeria_monocytogenes_1639_v150                         | Listeria_monocytogenes_1639_v105 | 0.9377 |
| Listeria_monocytogenes_1639_v14                          | Listeria_monocytogenes_1639_v105 | 0.9319 |
| Listeria_monocytogenes_1639_v149                         | Listeria_monocytogenes_1639_v105 | 0.9363 |
| Listeria_monocytogenes_1639_v148                         | Listeria_monocytogenes_1639_v105 | 0.9686 |
| Listeria_monocytogenes_1639_v147                         | Listeria_monocytogenes_1639_v105 | 0.9551 |
| Listeria_monocytogenes_1639_v146                         | Listeria_monocytogenes_1639_v105 | 0.9465 |
| Listeria_monocytogenes_1639_v145                         | Listeria_monocytogenes_1639_v105 | 0.9435 |
| Listeria_monocytogenes_1639_v144                         | Listeria_monocytogenes_1639_v105 | 0.9716 |
| Listeria_monocytogenes_1639_v143                         | Listeria_monocytogenes_1639_v105 | 0.9473 |
| Listeria_monocytogenes_1639_v142                         | Listeria_monocytogenes_1639_v105 | 0.9719 |
| Listeria_monocytogenes_1639_v141                         | Listeria_monocytogenes_1639_v105 | 0.9638 |
| Listeria_monocytogenes_1639_v140                         | Listeria_monocytogenes_1639_v105 | 0.9723 |
| Listeria_monocytogenes_1639_v13                          | Listeria_monocytogenes_1639_v105 | 0.9243 |
| Listeria_monocytogenes_1639_v139                         | Listeria_monocytogenes_1639_v105 | 0.9724 |
| Listeria_monocytogenes_1639_v138                         | Listeria_monocytogenes_1639_v105 | 0.9743 |
| Listeria_monocytogenes_1639_v137                         | Listeria_monocytogenes_1639_v105 | 0.9739 |
| Listeria_monocytogenes_1639_v136                         | Listeria_monocytogenes_1639_v105 | 0.938  |
| Listeria_monocytogenes_1639_v135                         | Listeria_monocytogenes_1639_v105 | 0.92   |
| Listeria_monocytogenes_1639_v134                         | Listeria_monocytogenes_1639_v105 | 0.9801 |
| Listeria_monocytogenes_1639_v133                         | Listeria_monocytogenes_1639_v105 | 0.9351 |
| Listeria_monocytogenes_1639_v132                         | Listeria_monocytogenes_1639_v105 | 0.9205 |
| Listeria_monocytogenes_1639_v131                         | Listeria_monocytogenes_1639_v105 | 0.9575 |
| Listeria_monocytogenes_1639_v130                         | Listeria_monocytogenes_1639_v105 | 0.9258 |
| Listeria_monocytogenes_1639_v12                          | Listeria_monocytogenes_1639_v105 | 0.9068 |
| Listeria_monocytogenes_1639_v129                         | Listeria_monocytogenes_1639_v105 | 0.9639 |
| Listeria_monocytogenes_1639_v128                         | Listeria_monocytogenes_1639_v105 | 0.9617 |
| Listeria_monocytogenes_1639_v127                         | Listeria_monocytogenes_1639_v105 | 0.9342 |
| Listeria_monocytogenes_1639_v126                         | Listeria_monocytogenes_1639_v105 | 0.9598 |
| Listeria_monocytogenes_1639_v125                         | Listeria_monocytogenes_1639_v105 | 0.9343 |
| Listeria_monocytogenes_1639_v124                         | Listeria_monocytogenes_1639_v105 | 0.9432 |
| Listeria_monocytogenes_1639_v123                         | Listeria_monocytogenes_1639_v105 | 0.9716 |
| Listeria_monocytogenes_1639_v122                         | Listeria_monocytogenes_1639_v105 | 0.9716 |
| Listeria_monocytogenes_1639_v121                         | Listeria_monocytogenes_1639_v105 | 0.9716 |
| Listeria_monocytogenes_1639_v120                         | Listeria_monocytogenes_1639_v105 | 0.972  |
| Listeria_monocytogenes_1639_v11                          | Listeria_monocytogenes_1639_v105 | 0.9081 |
| Listeria_monocytogenes_1639_v119                         | Listeria_monocytogenes_1639_v105 | 0.9716 |
| Listeria_monocytogenes_1639_v118                         | Listeria_monocytogenes_1639_v105 | 0.9716 |
| Listeria_monocytogenes_1639_v117                         | Listeria_monocytogenes_1639_v105 | 0.9365 |
| Listeria_monocytogenes_1639_v116                         | Listeria_monocytogenes_1639_v105 | 0.9813 |
| Listeria_monocytogenes_1639_v115                         | Listeria_monocytogenes_1639_v105 | 0.9809 |
| Listeria_monocytogenes_1639_v114                         | Listeria_monocytogenes_1639_v105 | 0.9295 |
| Listeria_monocytogenes_1639_v113                         | Listeria_monocytogenes_1639_v105 | 0.9546 |
| Listeria_monocytogenes_1639_v112                         | Listeria_monocytogenes_1639_v105 | 0.9654 |
| Listeria_monocytogenes_1639_v111                         | Listeria_monocytogenes_1639_v105 | 0.9461 |
| Listeria_monocytogenes_1639_v110                         | Listeria_monocytogenes_1639_v105 | 0.9292 |
| Listeria_monocytogenes_1639_v10                          | Listeria_monocytogenes_1639_v105 | 0.923  |
| Listeria_monocytogenes_1639_v109                         | Listeria_monocytogenes_1639_v105 | 0.9288 |
| Listeria_monocytogenes_1639_v108                         | Listeria_monocytogenes_1639_v105 | 0.9587 |
| Listeria_monocytogenes_1639_v107                         | Listeria_monocytogenes_1639_v105 | 0.9985 |
| Listeria_monocytogenes_1639_v106                         | Listeria_monocytogenes_1639_v105 | 0.9996 |
| Listeria_monocytogenes_1639_v105                         | Listeria_monocytogenes_1639_v105 | 0.0684 |
| Listeria_welshimeri_1643                                 | Listeria_monocytogenes_1639_v106 | 0.89   |
| Listeria_welshimeri_serovar_6b_str_SLCC5334_386043       | Listeria_monocytogenes_1639_v106 | 0.8897 |
| Listeria_seeligeri_serovar_1_2b_str_SLCC3954_683837      | Listeria_monocytogenes_1639_v106 | 0.8869 |
| Listeria_seeligeri_FSL_S4-171_702452                     | Listeria_monocytogenes_1639_v106 | 0.8273 |
| Listeria_seeligeri_FSL_N1-067_702453                     | Listeria_monocytogenes_1639_v106 | 0.8293 |
| Listeria_seeligeri_1640_v1                               | Listeria_monocytogenes_1639_v106 | 0.8937 |
| Listeria_seeligeri_1640                                  | Listeria_monocytogenes_1639_v106 | 0.8804 |
| Listeria_monocytogenes_WSLC1042_1457188                  | Listeria_monocytogenes_1639_v106 | 0.9798 |
| Listeria_monocytogenes_WSLC1001_1457187                  | Listeria_monocytogenes_1639_v106 | 0.9309 |
| Listeria_monocytogenes_SLCC7179_879090                   | Listeria_monocytogenes_1639_v106 | 0.9376 |
| Listeria_monocytogenes_SLCC5850_882096                   | Listeria_monocytogenes_1639_v106 | 0.9352 |
| Listeria_monocytogenes_SLCC2755_932919                   | Listeria_monocytogenes_1639_v106 | 0.9444 |
| Listeria_monocytogenes_SLCC2540_879089                   | Listeria_monocytogenes_1639_v106 | 0.9476 |
| Listeria_monocytogenes_SLCC2479_882020                   | Listeria_monocytogenes_1639_v106 | 0.9257 |
| Listeria_monocytogenes_SLCC2378_879088                   | Listeria_monocytogenes_1639_v106 | 0.9813 |
| Listeria_monocytogenes_SLCC2376_882097                   | Listeria_monocytogenes_1639_v106 | 0.9409 |
| Listeria_monocytogenes_SLCC2372_932920                   | Listeria_monocytogenes_1639_v106 | 0.9185 |
| Listeria_monocytogenes_serotype_4b_str_LL195_1230340     | Listeria_monocytogenes_1639_v106 | 0.9762 |
| Listeria_monocytogenes_serotype_4b_str_LIS0087_1134669   | Listeria_monocytogenes_1639_v106 | 0.9119 |
| Listeria_monocytogenes_serotype_4b_str_F2365_265669      | Listeria_monocytogenes_1639_v106 | 0.9762 |
| Listeria_monocytogenes_serotype_4b_str_CLIP_80459_568819 | Listeria_monocytogenes_1639_v106 | 0.9715 |
| Listeria_monocytogenes_serotype_4b_str_81-0861_1196161   | Listeria_monocytogenes_1639_v106 | 0.9698 |
| Listeria_monocytogenes_serotype_4b_str_81-0592_1196160   | Listeria_monocytogenes_1639_v106 | 0.9709 |
| Listeria_monocytogenes_serotype_4b_str_81-0558_1196159   | Listeria_monocytogenes_1639_v106 | 0.9702 |
| Listeria_monocytogenes_serotype_4b_str_10-0809_1196162   | Listeria_monocytogenes_1639_v106 | 0.9709 |
| Listeria_monocytogenes_serotype_4b_str_02-6680_1196175   | Listeria_monocytogenes_1639_v106 | 0.9781 |
| Listeria_monocytogenes_serotype_4b_str_02-6679_1196174   | Listeria_monocytogenes_1639_v106 | 0.9781 |
| Listeria_monocytogenes_serotype_4b_str_02-1792_1196173   | Listeria_monocytogenes_1639_v106 | 0.9702 |
| Listeria_monocytogenes_serotype_4b_str_02-1289_1196172   | Listeria_monocytogenes_1639_v106 | 0.9702 |
| Listeria_monocytogenes_serotype_4b_str_02-1103_1196171   | Listeria_monocytogenes_1639_v106 | 0.9702 |
| Listeria_monocytogenes_serotype_3c_str_10-5027_1196195   | Listeria_monocytogenes_1639_v106 | 0.925  |
| Listeria_monocytogenes_serotype_1_2c_str_10-5026_1196194 | Listeria_monocytogenes_1639_v106 | 0.9257 |
| Listeria_monocytogenes_serotype_1_2c_str_10-5025_1196193 | Listeria_monocytogenes_1639_v106 | 0.9257 |
| Listeria_monocytogenes_serotype_1_2b_str_10-0811_1196164 | Listeria_monocytogenes_1639_v106 | 0.9384 |
| Listeria_monocytogenes_serotype_1_2b_str_10-0810_1196163 | Listeria_monocytogenes_1639_v106 | 0.9384 |
| Listeria_monocytogenes_serotype_1_2a_str_99-6370_1196179 | Listeria_monocytogenes_1639_v106 | 0.9148 |
| Listeria_monocytogenes_serotype_1_2a_str_98-2035_1196178 | Listeria_monocytogenes_1639_v106 | 0.9148 |
| Listeria_monocytogenes_serotype_1_2a_str_95-0093_1196177 | Listeria_monocytogenes_1639_v106 | 0.9203 |
| Listeria_monocytogenes_serotype_1_2a_str_88-0478_1196176 | Listeria_monocytogenes_1639_v106 | 0.9191 |
| Listeria_monocytogenes_serotype_1_2a_str_10-5024_1196192 | Listeria_monocytogenes_1639_v106 | 0.9203 |



|                                                          |                                  |        |
|----------------------------------------------------------|----------------------------------|--------|
| Listeria_monocytogenes_serotype_1_2a_str_10-4758_1196168 | Listeria_monocytogenes_1639_v106 | 0.9383 |
| Listeria_monocytogenes_serotype_1_2a_str_10-4754_1196167 | Listeria_monocytogenes_1639_v106 | 0.9387 |
| Listeria_monocytogenes_serotype_1_2a_str_10-1321_1196191 | Listeria_monocytogenes_1639_v106 | 0.9203 |
| Listeria_monocytogenes_serotype_1_2a_str_10-1047_1196190 | Listeria_monocytogenes_1639_v106 | 0.9209 |
| Listeria_monocytogenes_serotype_1_2a_str_10-1046_1196189 | Listeria_monocytogenes_1639_v106 | 0.9209 |
| Listeria_monocytogenes_serotype_1_2a_str_10-0934_1196170 | Listeria_monocytogenes_1639_v106 | 0.9452 |
| Listeria_monocytogenes_serotype_1_2a_str_10-0933_1196169 | Listeria_monocytogenes_1639_v106 | 0.9452 |
| Listeria_monocytogenes_serotype_1_2a_str_10-0815_1196188 | Listeria_monocytogenes_1639_v106 | 0.9162 |
| Listeria_monocytogenes_serotype_1_2a_str_10-0814_1196187 | Listeria_monocytogenes_1639_v106 | 0.9206 |
| Listeria_monocytogenes_serotype_1_2a_str_10-0813_1196166 | Listeria_monocytogenes_1639_v106 | 0.9285 |
| Listeria_monocytogenes_serotype_1_2a_str_10-0812_1196165 | Listeria_monocytogenes_1639_v106 | 0.9285 |
| Listeria_monocytogenes_serotype_1_2a_str_08-7669_1196186 | Listeria_monocytogenes_1639_v106 | 0.9296 |
| Listeria_monocytogenes_serotype_1_2a_str_08-7374_1196185 | Listeria_monocytogenes_1639_v106 | 0.9203 |
| Listeria_monocytogenes_serotype_1_2a_str_08-6997_1196184 | Listeria_monocytogenes_1639_v106 | 0.9162 |
| Listeria_monocytogenes_serotype_1_2a_str_08-6569_1196183 | Listeria_monocytogenes_1639_v106 | 0.9162 |
| Listeria_monocytogenes_serotype_1_2a_str_08-6056_1196182 | Listeria_monocytogenes_1639_v106 | 0.9162 |
| Listeria_monocytogenes_serotype_1_2a_str_04-5457_1196181 | Listeria_monocytogenes_1639_v106 | 0.9203 |
| Listeria_monocytogenes_serotype_1_2a_str_02-5993_1196180 | Listeria_monocytogenes_1639_v106 | 0.9203 |
| Listeria_monocytogenes_R479a_1437838                     | Listeria_monocytogenes_1639_v106 | 0.9196 |
| Listeria_monocytogenes_N53-1_1234142                     | Listeria_monocytogenes_1639_v106 | 0.8912 |
| Listeria_monocytogenes_M7_1030009                        | Listeria_monocytogenes_1639_v106 | 0.9058 |
| Listeria_monocytogenes_LO28_393132                       | Listeria_monocytogenes_1639_v106 | 0.9244 |
| Listeria_monocytogenes_L99_563174                        | Listeria_monocytogenes_1639_v106 | 0.9061 |
| Listeria_monocytogenes_L312_882094                       | Listeria_monocytogenes_1639_v106 | 0.9719 |
| Listeria_monocytogenes_J1816_930781                      | Listeria_monocytogenes_1639_v106 | 0.95   |
| Listeria_monocytogenes_J1-220_930782                     | Listeria_monocytogenes_1639_v106 | 0.9779 |
| Listeria_monocytogenes_J0161_393130                      | Listeria_monocytogenes_1639_v106 | 0.9274 |
| Listeria_monocytogenes_HCC23_552536                      | Listeria_monocytogenes_1639_v106 | 0.9054 |
| Listeria_monocytogenes_FSL_R2-561_393126                 | Listeria_monocytogenes_1639_v106 | 0.9247 |
| Listeria_monocytogenes_FSL_J1-208_393119                 | Listeria_monocytogenes_1639_v106 | 0.9206 |
| Listeria_monocytogenes_FSL_J1-175_393118                 | Listeria_monocytogenes_1639_v106 | 0.955  |
| Listeria_monocytogenes_Finland_1998_393127               | Listeria_monocytogenes_1639_v106 | 0.9471 |
| Listeria_monocytogenes_EGD-e_169963_v1                   | Listeria_monocytogenes_1639_v106 | 0.9342 |
| Listeria_monocytogenes_EGD-e_169963                      | Listeria_monocytogenes_1639_v106 | 0.9346 |
| Listeria_monocytogenes_EGD_1334565                       | Listeria_monocytogenes_1639_v106 | 0.9359 |
| Listeria_monocytogenes_CFSAN002349_1299895               | Listeria_monocytogenes_1639_v106 | 0.9716 |
| Listeria_monocytogenes_ATCC_19117_882095_v1              | Listeria_monocytogenes_1639_v106 | 0.9989 |
| Listeria_monocytogenes_ATCC_19117_882095                 | Listeria_monocytogenes_1639_v106 | 0.9985 |
| Listeria_monocytogenes_6179_1288295                      | Listeria_monocytogenes_1639_v106 | 0.9113 |
| Listeria_monocytogenes_1639_v9                           | Listeria_monocytogenes_1639_v106 | 0.926  |
| Listeria_monocytogenes_1639_v99                          | Listeria_monocytogenes_1639_v106 | 0.9504 |
| Listeria_monocytogenes_1639_v98                          | Listeria_monocytogenes_1639_v106 | 0.9254 |
| Listeria_monocytogenes_1639_v97                          | Listeria_monocytogenes_1639_v106 | 0.9655 |
| Listeria_monocytogenes_1639_v96                          | Listeria_monocytogenes_1639_v106 | 0.9497 |
| Listeria_monocytogenes_1639_v95                          | Listeria_monocytogenes_1639_v106 | 0.9497 |
| Listeria_monocytogenes_1639_v94                          | Listeria_monocytogenes_1639_v106 | 0.95   |
| Listeria_monocytogenes_1639_v93                          | Listeria_monocytogenes_1639_v106 | 0.9239 |
| Listeria_monocytogenes_1639_v92                          | Listeria_monocytogenes_1639_v106 | 0.95   |
| Listeria_monocytogenes_1639_v91                          | Listeria_monocytogenes_1639_v106 | 0.9567 |
| Listeria_monocytogenes_1639_v90                          | Listeria_monocytogenes_1639_v106 | 0.9254 |
| Listeria_monocytogenes_1639_v8                           | Listeria_monocytogenes_1639_v106 | 0.9116 |
| Listeria_monocytogenes_1639_v89                          | Listeria_monocytogenes_1639_v106 | 0.9669 |
| Listeria_monocytogenes_1639_v88                          | Listeria_monocytogenes_1639_v106 | 0.926  |
| Listeria_monocytogenes_1639_v87                          | Listeria_monocytogenes_1639_v106 | 0.9247 |
| Listeria_monocytogenes_1639_v86                          | Listeria_monocytogenes_1639_v106 | 0.9244 |
| Listeria_monocytogenes_1639_v85                          | Listeria_monocytogenes_1639_v106 | 0.9691 |
| Listeria_monocytogenes_1639_v84                          | Listeria_monocytogenes_1639_v106 | 0.9314 |
| Listeria_monocytogenes_1639_v83                          | Listeria_monocytogenes_1639_v106 | 0.9871 |
| Listeria_monocytogenes_1639_v82                          | Listeria_monocytogenes_1639_v106 | 0.9864 |
| Listeria_monocytogenes_1639_v81                          | Listeria_monocytogenes_1639_v106 | 0.9278 |
| Listeria_monocytogenes_1639_v80                          | Listeria_monocytogenes_1639_v106 | 0.9447 |
| Listeria_monocytogenes_1639_v7                           | Listeria_monocytogenes_1639_v106 | 0.9116 |
| Listeria_monocytogenes_1639_v79                          | Listeria_monocytogenes_1639_v106 | 0.9261 |
| Listeria_monocytogenes_1639_v78                          | Listeria_monocytogenes_1639_v106 | 0.9271 |
| Listeria_monocytogenes_1639_v77                          | Listeria_monocytogenes_1639_v106 | 0.931  |
| Listeria_monocytogenes_1639_v76                          | Listeria_monocytogenes_1639_v106 | 0.9224 |
| Listeria_monocytogenes_1639_v75                          | Listeria_monocytogenes_1639_v106 | 0.9061 |
| Listeria_monocytogenes_1639_v74                          | Listeria_monocytogenes_1639_v106 | 0.9232 |
| Listeria_monocytogenes_1639_v73                          | Listeria_monocytogenes_1639_v106 | 0.9199 |
| Listeria_monocytogenes_1639_v72                          | Listeria_monocytogenes_1639_v106 | 0.9856 |
| Listeria_monocytogenes_1639_v71                          | Listeria_monocytogenes_1639_v106 | 0.9115 |
| Listeria_monocytogenes_1639_v70                          | Listeria_monocytogenes_1639_v106 | 0.9219 |
| Listeria_monocytogenes_1639_v6                           | Listeria_monocytogenes_1639_v106 | 0.9113 |
| Listeria_monocytogenes_1639_v69                          | Listeria_monocytogenes_1639_v106 | 0.9709 |
| Listeria_monocytogenes_1639_v68                          | Listeria_monocytogenes_1639_v106 | 0.941  |
| Listeria_monocytogenes_1639_v67                          | Listeria_monocytogenes_1639_v106 | 0.9444 |
| Listeria_monocytogenes_1639_v66                          | Listeria_monocytogenes_1639_v106 | 0.9323 |
| Listeria_monocytogenes_1639_v65                          | Listeria_monocytogenes_1639_v106 | 0.923  |
| Listeria_monocytogenes_1639_v64                          | Listeria_monocytogenes_1639_v106 | 0.9264 |
| Listeria_monocytogenes_1639_v63                          | Listeria_monocytogenes_1639_v106 | 0.9399 |
| Listeria_monocytogenes_1639_v62                          | Listeria_monocytogenes_1639_v106 | 0.9233 |
| Listeria_monocytogenes_1639_v61                          | Listeria_monocytogenes_1639_v106 | 0.923  |
| Listeria_monocytogenes_1639_v60                          | Listeria_monocytogenes_1639_v106 | 0.9293 |
| Listeria_monocytogenes_1639_v5                           | Listeria_monocytogenes_1639_v106 | 0.9061 |
| Listeria_monocytogenes_1639_v59                          | Listeria_monocytogenes_1639_v106 | 0.9875 |
| Listeria_monocytogenes_1639_v58                          | Listeria_monocytogenes_1639_v106 | 0.9765 |
| Listeria_monocytogenes_1639_v57                          | Listeria_monocytogenes_1639_v106 | 0.9469 |
| Listeria_monocytogenes_1639_v56                          | Listeria_monocytogenes_1639_v106 | 0.9875 |
| Listeria_monocytogenes_1639_v55                          | Listeria_monocytogenes_1639_v106 | 0.9426 |
| Listeria_monocytogenes_1639_v54                          | Listeria_monocytogenes_1639_v106 | 0.9253 |
| Listeria_monocytogenes_1639_v53                          | Listeria_monocytogenes_1639_v106 | 0.9297 |



|                                                          |                                  |        |
|----------------------------------------------------------|----------------------------------|--------|
| Listeria_monocytogenes_1639_v14                          | Listeria_monocytogenes_1639_v106 | 0.9319 |
| Listeria_monocytogenes_1639_v149                         | Listeria_monocytogenes_1639_v106 | 0.9363 |
| Listeria_monocytogenes_1639_v148                         | Listeria_monocytogenes_1639_v106 | 0.9686 |
| Listeria_monocytogenes_1639_v147                         | Listeria_monocytogenes_1639_v106 | 0.9551 |
| Listeria_monocytogenes_1639_v146                         | Listeria_monocytogenes_1639_v106 | 0.9465 |
| Listeria_monocytogenes_1639_v145                         | Listeria_monocytogenes_1639_v106 | 0.9431 |
| Listeria_monocytogenes_1639_v144                         | Listeria_monocytogenes_1639_v106 | 0.9712 |
| Listeria_monocytogenes_1639_v143                         | Listeria_monocytogenes_1639_v106 | 0.9473 |
| Listeria_monocytogenes_1639_v142                         | Listeria_monocytogenes_1639_v106 | 0.9716 |
| Listeria_monocytogenes_1639_v141                         | Listeria_monocytogenes_1639_v106 | 0.9638 |
| Listeria_monocytogenes_1639_v140                         | Listeria_monocytogenes_1639_v106 | 0.9723 |
| Listeria_monocytogenes_1639_v13                          | Listeria_monocytogenes_1639_v106 | 0.9243 |
| Listeria_monocytogenes_1639_v139                         | Listeria_monocytogenes_1639_v106 | 0.9724 |
| Listeria_monocytogenes_1639_v138                         | Listeria_monocytogenes_1639_v106 | 0.9739 |
| Listeria_monocytogenes_1639_v137                         | Listeria_monocytogenes_1639_v106 | 0.9739 |
| Listeria_monocytogenes_1639_v136                         | Listeria_monocytogenes_1639_v106 | 0.938  |
| Listeria_monocytogenes_1639_v135                         | Listeria_monocytogenes_1639_v106 | 0.92   |
| Listeria_monocytogenes_1639_v134                         | Listeria_monocytogenes_1639_v106 | 0.9801 |
| Listeria_monocytogenes_1639_v133                         | Listeria_monocytogenes_1639_v106 | 0.9351 |
| Listeria_monocytogenes_1639_v132                         | Listeria_monocytogenes_1639_v106 | 0.9205 |
| Listeria_monocytogenes_1639_v131                         | Listeria_monocytogenes_1639_v106 | 0.9575 |
| Listeria_monocytogenes_1639_v130                         | Listeria_monocytogenes_1639_v106 | 0.9258 |
| Listeria_monocytogenes_1639_v12                          | Listeria_monocytogenes_1639_v106 | 0.9068 |
| Listeria_monocytogenes_1639_v129                         | Listeria_monocytogenes_1639_v106 | 0.9639 |
| Listeria_monocytogenes_1639_v128                         | Listeria_monocytogenes_1639_v106 | 0.9617 |
| Listeria_monocytogenes_1639_v127                         | Listeria_monocytogenes_1639_v106 | 0.9342 |
| Listeria_monocytogenes_1639_v126                         | Listeria_monocytogenes_1639_v106 | 0.9598 |
| Listeria_monocytogenes_1639_v125                         | Listeria_monocytogenes_1639_v106 | 0.9343 |
| Listeria_monocytogenes_1639_v124                         | Listeria_monocytogenes_1639_v106 | 0.9432 |
| Listeria_monocytogenes_1639_v123                         | Listeria_monocytogenes_1639_v106 | 0.9716 |
| Listeria_monocytogenes_1639_v122                         | Listeria_monocytogenes_1639_v106 | 0.9716 |
| Listeria_monocytogenes_1639_v121                         | Listeria_monocytogenes_1639_v106 | 0.9716 |
| Listeria_monocytogenes_1639_v120                         | Listeria_monocytogenes_1639_v106 | 0.9716 |
| Listeria_monocytogenes_1639_v11                          | Listeria_monocytogenes_1639_v106 | 0.9081 |
| Listeria_monocytogenes_1639_v119                         | Listeria_monocytogenes_1639_v106 | 0.9716 |
| Listeria_monocytogenes_1639_v118                         | Listeria_monocytogenes_1639_v106 | 0.9716 |
| Listeria_monocytogenes_1639_v117                         | Listeria_monocytogenes_1639_v106 | 0.9365 |
| Listeria_monocytogenes_1639_v116                         | Listeria_monocytogenes_1639_v106 | 0.9813 |
| Listeria_monocytogenes_1639_v115                         | Listeria_monocytogenes_1639_v106 | 0.9809 |
| Listeria_monocytogenes_1639_v114                         | Listeria_monocytogenes_1639_v106 | 0.9295 |
| Listeria_monocytogenes_1639_v113                         | Listeria_monocytogenes_1639_v106 | 0.9546 |
| Listeria_monocytogenes_1639_v112                         | Listeria_monocytogenes_1639_v106 | 0.965  |
| Listeria_monocytogenes_1639_v111                         | Listeria_monocytogenes_1639_v106 | 0.9461 |
| Listeria_monocytogenes_1639_v110                         | Listeria_monocytogenes_1639_v106 | 0.9292 |
| Listeria_monocytogenes_1639_v10                          | Listeria_monocytogenes_1639_v106 | 0.923  |
| Listeria_monocytogenes_1639_v109                         | Listeria_monocytogenes_1639_v106 | 0.9288 |
| Listeria_monocytogenes_1639_v108                         | Listeria_monocytogenes_1639_v106 | 0.9587 |
| Listeria_monocytogenes_1639_v107                         | Listeria_monocytogenes_1639_v106 | 0.9981 |
| Listeria_monocytogenes_1639_v106                         | Listeria_monocytogenes_1639_v106 | 0.0684 |
| Listeria_welshimeri_1643                                 | Listeria_monocytogenes_1639_v107 | 0.89   |
| Listeria_welshimeri_serovar_6b_str_SLCC5334_386043       | Listeria_monocytogenes_1639_v107 | 0.8897 |
| Listeria_seeligeri_serovar_1_2b_str_SLCC3954_683837      | Listeria_monocytogenes_1639_v107 | 0.8869 |
| Listeria_seeligeri_FSL_S4-171_702452                     | Listeria_monocytogenes_1639_v107 | 0.8277 |
| Listeria_seeligeri_FSL_N1-067_702453                     | Listeria_monocytogenes_1639_v107 | 0.8293 |
| Listeria_seeligeri_1640_v1                               | Listeria_monocytogenes_1639_v107 | 0.8937 |
| Listeria_seeligeri_1640                                  | Listeria_monocytogenes_1639_v107 | 0.8804 |
| Listeria_monocytogenes_WSLC1042_1457188                  | Listeria_monocytogenes_1639_v107 | 0.9794 |
| Listeria_monocytogenes_WSLC1001_1457187                  | Listeria_monocytogenes_1639_v107 | 0.9306 |
| Listeria_monocytogenes_SLCC7179_879090                   | Listeria_monocytogenes_1639_v107 | 0.9372 |
| Listeria_monocytogenes_SLCC5850_882096                   | Listeria_monocytogenes_1639_v107 | 0.9348 |
| Listeria_monocytogenes_SLCC2755_932919                   | Listeria_monocytogenes_1639_v107 | 0.944  |
| Listeria_monocytogenes_SLCC2540_879089                   | Listeria_monocytogenes_1639_v107 | 0.9472 |
| Listeria_monocytogenes_SLCC2479_882020                   | Listeria_monocytogenes_1639_v107 | 0.9254 |
| Listeria_monocytogenes_SLCC2378_879088                   | Listeria_monocytogenes_1639_v107 | 0.9809 |
| Listeria_monocytogenes_SLCC2376_882097                   | Listeria_monocytogenes_1639_v107 | 0.9406 |
| Listeria_monocytogenes_SLCC2372_932920                   | Listeria_monocytogenes_1639_v107 | 0.9181 |
| Listeria_monocytogenes_serotype_4b_str_LL195_1230340     | Listeria_monocytogenes_1639_v107 | 0.9758 |
| Listeria_monocytogenes_serotype_4b_str_LIS0087_1134669   | Listeria_monocytogenes_1639_v107 | 0.9115 |
| Listeria_monocytogenes_serotype_4b_str_F2365_265669      | Listeria_monocytogenes_1639_v107 | 0.9758 |
| Listeria_monocytogenes_serotype_4b_str_CLIP_80459_568819 | Listeria_monocytogenes_1639_v107 | 0.9712 |
| Listeria_monocytogenes_serotype_4b_str_81-0861_1196161   | Listeria_monocytogenes_1639_v107 | 0.9694 |
| Listeria_monocytogenes_serotype_4b_str_81-0592_1196160   | Listeria_monocytogenes_1639_v107 | 0.9705 |
| Listeria_monocytogenes_serotype_4b_str_81-0558_1196159   | Listeria_monocytogenes_1639_v107 | 0.9698 |
| Listeria_monocytogenes_serotype_4b_str_10-0809_1196162   | Listeria_monocytogenes_1639_v107 | 0.9705 |
| Listeria_monocytogenes_serotype_4b_str_02-6680_1196175   | Listeria_monocytogenes_1639_v107 | 0.9781 |
| Listeria_monocytogenes_serotype_4b_str_02-6679_1196174   | Listeria_monocytogenes_1639_v107 | 0.9781 |
| Listeria_monocytogenes_serotype_4b_str_02-1792_1196173   | Listeria_monocytogenes_1639_v107 | 0.9698 |
| Listeria_monocytogenes_serotype_4b_str_02-1289_1196172   | Listeria_monocytogenes_1639_v107 | 0.9698 |
| Listeria_monocytogenes_serotype_4b_str_02-1103_1196171   | Listeria_monocytogenes_1639_v107 | 0.9698 |
| Listeria_monocytogenes_serotype_3c_str_10-5027_1196195   | Listeria_monocytogenes_1639_v107 | 0.9246 |
| Listeria_monocytogenes_serotype_1_2c_str_10-5026_1196194 | Listeria_monocytogenes_1639_v107 | 0.9254 |
| Listeria_monocytogenes_serotype_1_2c_str_10-5025_1196193 | Listeria_monocytogenes_1639_v107 | 0.9254 |
| Listeria_monocytogenes_serotype_1_2b_str_10-0811_1196164 | Listeria_monocytogenes_1639_v107 | 0.9381 |
| Listeria_monocytogenes_serotype_1_2b_str_10-0810_1196163 | Listeria_monocytogenes_1639_v107 | 0.9381 |
| Listeria_monocytogenes_serotype_1_2a_str_99-6370_1196179 | Listeria_monocytogenes_1639_v107 | 0.9144 |
| Listeria_monocytogenes_serotype_1_2a_str_98-2035_1196178 | Listeria_monocytogenes_1639_v107 | 0.9144 |
| Listeria_monocytogenes_serotype_1_2a_str_95-0093_1196177 | Listeria_monocytogenes_1639_v107 | 0.9199 |
| Listeria_monocytogenes_serotype_1_2a_str_88-0478_1196176 | Listeria_monocytogenes_1639_v107 | 0.9187 |
| Listeria_monocytogenes_serotype_1_2a_str_10-5024_1196192 | Listeria_monocytogenes_1639_v107 | 0.9199 |
| Listeria_monocytogenes_serotype_1_2a_str_10-4758_1196168 | Listeria_monocytogenes_1639_v107 | 0.938  |
| Listeria_monocytogenes_serotype_1_2a_str_10-4754_1196167 | Listeria_monocytogenes_1639_v107 | 0.9383 |

|                                                          |                                  |        |
|----------------------------------------------------------|----------------------------------|--------|
| Listeria_monocytogenes_serotype_1_2a_str_10-1321_1196191 | Listeria_monocytogenes_1639_v107 | 0.9199 |
| Listeria_monocytogenes_serotype_1_2a_str_10-1047_1196190 | Listeria_monocytogenes_1639_v107 | 0.9206 |
| Listeria_monocytogenes_serotype_1_2a_str_10-1046_1196189 | Listeria_monocytogenes_1639_v107 | 0.9206 |
| Listeria_monocytogenes_serotype_1_2a_str_10-0934_1196170 | Listeria_monocytogenes_1639_v107 | 0.9448 |
| Listeria_monocytogenes_serotype_1_2a_str_10-0933_1196169 | Listeria_monocytogenes_1639_v107 | 0.9448 |
| Listeria_monocytogenes_serotype_1_2a_str_10-0815_1196188 | Listeria_monocytogenes_1639_v107 | 0.9158 |
| Listeria_monocytogenes_serotype_1_2a_str_10-0814_1196187 | Listeria_monocytogenes_1639_v107 | 0.9203 |
| Listeria_monocytogenes_serotype_1_2a_str_10-0813_1196166 | Listeria_monocytogenes_1639_v107 | 0.9281 |
| Listeria_monocytogenes_serotype_1_2a_str_10-0812_1196165 | Listeria_monocytogenes_1639_v107 | 0.9281 |
| Listeria_monocytogenes_serotype_1_2a_str_08-7669_1196186 | Listeria_monocytogenes_1639_v107 | 0.9292 |
| Listeria_monocytogenes_serotype_1_2a_str_08-7374_1196185 | Listeria_monocytogenes_1639_v107 | 0.9199 |
| Listeria_monocytogenes_serotype_1_2a_str_08-6997_1196184 | Listeria_monocytogenes_1639_v107 | 0.9158 |
| Listeria_monocytogenes_serotype_1_2a_str_08-6569_1196183 | Listeria_monocytogenes_1639_v107 | 0.9158 |
| Listeria_monocytogenes_serotype_1_2a_str_08-6056_1196182 | Listeria_monocytogenes_1639_v107 | 0.9158 |
| Listeria_monocytogenes_serotype_1_2a_str_04-5457_1196181 | Listeria_monocytogenes_1639_v107 | 0.9199 |
| Listeria_monocytogenes_serotype_1_2a_str_02-5993_1196180 | Listeria_monocytogenes_1639_v107 | 0.9199 |
| Listeria_monocytogenes_R479a_1437838                     | Listeria_monocytogenes_1639_v107 | 0.9192 |
| Listeria_monocytogenes_N53-1_1234142                     | Listeria_monocytogenes_1639_v107 | 0.8908 |
| Listeria_monocytogenes_M7_1030009                        | Listeria_monocytogenes_1639_v107 | 0.9054 |
| Listeria_monocytogenes_LO28_393132                       | Listeria_monocytogenes_1639_v107 | 0.924  |
| Listeria_monocytogenes_L99_563174                        | Listeria_monocytogenes_1639_v107 | 0.9058 |
| Listeria_monocytogenes_L312_882094                       | Listeria_monocytogenes_1639_v107 | 0.9715 |
| Listeria_monocytogenes_J1816_930781                      | Listeria_monocytogenes_1639_v107 | 0.95   |
| Listeria_monocytogenes_J1-220_930782                     | Listeria_monocytogenes_1639_v107 | 0.9775 |
| Listeria_monocytogenes_J0161_393130                      | Listeria_monocytogenes_1639_v107 | 0.927  |
| Listeria_monocytogenes_HCC23_552536                      | Listeria_monocytogenes_1639_v107 | 0.905  |
| Listeria_monocytogenes_FSL_R2-561_393126                 | Listeria_monocytogenes_1639_v107 | 0.9239 |
| Listeria_monocytogenes_FSL_J1-208_393119                 | Listeria_monocytogenes_1639_v107 | 0.9203 |
| Listeria_monocytogenes_FSL_J1-175_393118                 | Listeria_monocytogenes_1639_v107 | 0.9546 |
| Listeria_monocytogenes_Finland_1998_393127               | Listeria_monocytogenes_1639_v107 | 0.9464 |
| Listeria_monocytogenes_EGD-e_169963_v1                   | Listeria_monocytogenes_1639_v107 | 0.9338 |
| Listeria_monocytogenes_EGD-e_169963                      | Listeria_monocytogenes_1639_v107 | 0.9342 |
| Listeria_monocytogenes_EGD_1334565                       | Listeria_monocytogenes_1639_v107 | 0.9355 |
| Listeria_monocytogenes_CFSAN002349_1299895               | Listeria_monocytogenes_1639_v107 | 0.9713 |
| Listeria_monocytogenes_ATCC_19117_882095_v1              | Listeria_monocytogenes_1639_v107 | 0.9985 |
| Listeria_monocytogenes_ATCC_19117_882095                 | Listeria_monocytogenes_1639_v107 | 0.9981 |
| Listeria_monocytogenes_6179_1288295                      | Listeria_monocytogenes_1639_v107 | 0.9109 |
| Listeria_monocytogenes_1639_v9                           | Listeria_monocytogenes_1639_v107 | 0.9252 |
| Listeria_monocytogenes_1639_v99                          | Listeria_monocytogenes_1639_v107 | 0.95   |
| Listeria_monocytogenes_1639_v98                          | Listeria_monocytogenes_1639_v107 | 0.9246 |
| Listeria_monocytogenes_1639_v97                          | Listeria_monocytogenes_1639_v107 | 0.9651 |
| Listeria_monocytogenes_1639_v96                          | Listeria_monocytogenes_1639_v107 | 0.9493 |
| Listeria_monocytogenes_1639_v95                          | Listeria_monocytogenes_1639_v107 | 0.9493 |
| Listeria_monocytogenes_1639_v94                          | Listeria_monocytogenes_1639_v107 | 0.9496 |
| Listeria_monocytogenes_1639_v93                          | Listeria_monocytogenes_1639_v107 | 0.9236 |
| Listeria_monocytogenes_1639_v92                          | Listeria_monocytogenes_1639_v107 | 0.9496 |
| Listeria_monocytogenes_1639_v91                          | Listeria_monocytogenes_1639_v107 | 0.9563 |
| Listeria_monocytogenes_1639_v90                          | Listeria_monocytogenes_1639_v107 | 0.9246 |
| Listeria_monocytogenes_1639_v8                           | Listeria_monocytogenes_1639_v107 | 0.9112 |
| Listeria_monocytogenes_1639_v89                          | Listeria_monocytogenes_1639_v107 | 0.9665 |
| Listeria_monocytogenes_1639_v88                          | Listeria_monocytogenes_1639_v107 | 0.9256 |
| Listeria_monocytogenes_1639_v87                          | Listeria_monocytogenes_1639_v107 | 0.9244 |
| Listeria_monocytogenes_1639_v86                          | Listeria_monocytogenes_1639_v107 | 0.924  |
| Listeria_monocytogenes_1639_v85                          | Listeria_monocytogenes_1639_v107 | 0.9691 |
| Listeria_monocytogenes_1639_v84                          | Listeria_monocytogenes_1639_v107 | 0.9311 |
| Listeria_monocytogenes_1639_v83                          | Listeria_monocytogenes_1639_v107 | 0.9868 |
| Listeria_monocytogenes_1639_v82                          | Listeria_monocytogenes_1639_v107 | 0.9864 |
| Listeria_monocytogenes_1639_v81                          | Listeria_monocytogenes_1639_v107 | 0.9271 |
| Listeria_monocytogenes_1639_v80                          | Listeria_monocytogenes_1639_v107 | 0.9443 |
| Listeria_monocytogenes_1639_v7                           | Listeria_monocytogenes_1639_v107 | 0.9112 |
| Listeria_monocytogenes_1639_v79                          | Listeria_monocytogenes_1639_v107 | 0.9253 |
| Listeria_monocytogenes_1639_v78                          | Listeria_monocytogenes_1639_v107 | 0.9264 |
| Listeria_monocytogenes_1639_v77                          | Listeria_monocytogenes_1639_v107 | 0.9306 |
| Listeria_monocytogenes_1639_v76                          | Listeria_monocytogenes_1639_v107 | 0.922  |
| Listeria_monocytogenes_1639_v75                          | Listeria_monocytogenes_1639_v107 | 0.9058 |
| Listeria_monocytogenes_1639_v74                          | Listeria_monocytogenes_1639_v107 | 0.9228 |
| Listeria_monocytogenes_1639_v73                          | Listeria_monocytogenes_1639_v107 | 0.9195 |
| Listeria_monocytogenes_1639_v72                          | Listeria_monocytogenes_1639_v107 | 0.9852 |
| Listeria_monocytogenes_1639_v71                          | Listeria_monocytogenes_1639_v107 | 0.9111 |
| Listeria_monocytogenes_1639_v70                          | Listeria_monocytogenes_1639_v107 | 0.9215 |
| Listeria_monocytogenes_1639_v6                           | Listeria_monocytogenes_1639_v107 | 0.9109 |
| Listeria_monocytogenes_1639_v69                          | Listeria_monocytogenes_1639_v107 | 0.9705 |
| Listeria_monocytogenes_1639_v68                          | Listeria_monocytogenes_1639_v107 | 0.9406 |
| Listeria_monocytogenes_1639_v67                          | Listeria_monocytogenes_1639_v107 | 0.9441 |
| Listeria_monocytogenes_1639_v66                          | Listeria_monocytogenes_1639_v107 | 0.9319 |
| Listeria_monocytogenes_1639_v65                          | Listeria_monocytogenes_1639_v107 | 0.9226 |
| Listeria_monocytogenes_1639_v64                          | Listeria_monocytogenes_1639_v107 | 0.926  |
| Listeria_monocytogenes_1639_v63                          | Listeria_monocytogenes_1639_v107 | 0.9395 |
| Listeria_monocytogenes_1639_v62                          | Listeria_monocytogenes_1639_v107 | 0.9225 |
| Listeria_monocytogenes_1639_v61                          | Listeria_monocytogenes_1639_v107 | 0.9226 |
| Listeria_monocytogenes_1639_v60                          | Listeria_monocytogenes_1639_v107 | 0.9289 |
| Listeria_monocytogenes_1639_v5                           | Listeria_monocytogenes_1639_v107 | 0.9057 |
| Listeria_monocytogenes_1639_v59                          | Listeria_monocytogenes_1639_v107 | 0.9871 |
| Listeria_monocytogenes_1639_v58                          | Listeria_monocytogenes_1639_v107 | 0.9762 |
| Listeria_monocytogenes_1639_v57                          | Listeria_monocytogenes_1639_v107 | 0.9465 |
| Listeria_monocytogenes_1639_v56                          | Listeria_monocytogenes_1639_v107 | 0.9871 |
| Listeria_monocytogenes_1639_v55                          | Listeria_monocytogenes_1639_v107 | 0.9422 |
| Listeria_monocytogenes_1639_v54                          | Listeria_monocytogenes_1639_v107 | 0.925  |
| Listeria_monocytogenes_1639_v53                          | Listeria_monocytogenes_1639_v107 | 0.9293 |
| Listeria_monocytogenes_1639_v52                          | Listeria_monocytogenes_1639_v107 | 0.9736 |
| Listeria_monocytogenes_1639_v51                          | Listeria_monocytogenes_1639_v107 | 0.9808 |

[illegible]

|                                                          |                                  |        |
|----------------------------------------------------------|----------------------------------|--------|
| Listeria_monocytogenes_1639_v148                         | Listeria_monocytogenes_1639_v107 | 0.9682 |
| Listeria_monocytogenes_1639_v147                         | Listeria_monocytogenes_1639_v107 | 0.9547 |
| Listeria_monocytogenes_1639_v146                         | Listeria_monocytogenes_1639_v107 | 0.9461 |
| Listeria_monocytogenes_1639_v145                         | Listeria_monocytogenes_1639_v107 | 0.9431 |
| Listeria_monocytogenes_1639_v144                         | Listeria_monocytogenes_1639_v107 | 0.9712 |
| Listeria_monocytogenes_1639_v143                         | Listeria_monocytogenes_1639_v107 | 0.9465 |
| Listeria_monocytogenes_1639_v142                         | Listeria_monocytogenes_1639_v107 | 0.9716 |
| Listeria_monocytogenes_1639_v141                         | Listeria_monocytogenes_1639_v107 | 0.9634 |
| Listeria_monocytogenes_1639_v140                         | Listeria_monocytogenes_1639_v107 | 0.9719 |
| Listeria_monocytogenes_1639_v13                          | Listeria_monocytogenes_1639_v107 | 0.924  |
| Listeria_monocytogenes_1639_v139                         | Listeria_monocytogenes_1639_v107 | 0.972  |
| Listeria_monocytogenes_1639_v138                         | Listeria_monocytogenes_1639_v107 | 0.9739 |
| Listeria_monocytogenes_1639_v137                         | Listeria_monocytogenes_1639_v107 | 0.9735 |
| Listeria_monocytogenes_1639_v136                         | Listeria_monocytogenes_1639_v107 | 0.9376 |
| Listeria_monocytogenes_1639_v135                         | Listeria_monocytogenes_1639_v107 | 0.9196 |
| Listeria_monocytogenes_1639_v134                         | Listeria_monocytogenes_1639_v107 | 0.9797 |
| Listeria_monocytogenes_1639_v133                         | Listeria_monocytogenes_1639_v107 | 0.9347 |
| Listeria_monocytogenes_1639_v132                         | Listeria_monocytogenes_1639_v107 | 0.9201 |
| Listeria_monocytogenes_1639_v131                         | Listeria_monocytogenes_1639_v107 | 0.9571 |
| Listeria_monocytogenes_1639_v130                         | Listeria_monocytogenes_1639_v107 | 0.9254 |
| Listeria_monocytogenes_1639_v12                          | Listeria_monocytogenes_1639_v107 | 0.9064 |
| Listeria_monocytogenes_1639_v129                         | Listeria_monocytogenes_1639_v107 | 0.9635 |
| Listeria_monocytogenes_1639_v128                         | Listeria_monocytogenes_1639_v107 | 0.9613 |
| Listeria_monocytogenes_1639_v127                         | Listeria_monocytogenes_1639_v107 | 0.9338 |
| Listeria_monocytogenes_1639_v126                         | Listeria_monocytogenes_1639_v107 | 0.9594 |
| Listeria_monocytogenes_1639_v125                         | Listeria_monocytogenes_1639_v107 | 0.9336 |
| Listeria_monocytogenes_1639_v124                         | Listeria_monocytogenes_1639_v107 | 0.9428 |
| Listeria_monocytogenes_1639_v123                         | Listeria_monocytogenes_1639_v107 | 0.9713 |
| Listeria_monocytogenes_1639_v122                         | Listeria_monocytogenes_1639_v107 | 0.9713 |
| Listeria_monocytogenes_1639_v121                         | Listeria_monocytogenes_1639_v107 | 0.9713 |
| Listeria_monocytogenes_1639_v120                         | Listeria_monocytogenes_1639_v107 | 0.9716 |
| Listeria_monocytogenes_1639_v11                          | Listeria_monocytogenes_1639_v107 | 0.9077 |
| Listeria_monocytogenes_1639_v119                         | Listeria_monocytogenes_1639_v107 | 0.9713 |
| Listeria_monocytogenes_1639_v118                         | Listeria_monocytogenes_1639_v107 | 0.9713 |
| Listeria_monocytogenes_1639_v117                         | Listeria_monocytogenes_1639_v107 | 0.9361 |
| Listeria_monocytogenes_1639_v116                         | Listeria_monocytogenes_1639_v107 | 0.9809 |
| Listeria_monocytogenes_1639_v115                         | Listeria_monocytogenes_1639_v107 | 0.9805 |
| Listeria_monocytogenes_1639_v114                         | Listeria_monocytogenes_1639_v107 | 0.9292 |
| Listeria_monocytogenes_1639_v113                         | Listeria_monocytogenes_1639_v107 | 0.9542 |
| Listeria_monocytogenes_1639_v112                         | Listeria_monocytogenes_1639_v107 | 0.965  |
| Listeria_monocytogenes_1639_v111                         | Listeria_monocytogenes_1639_v107 | 0.9457 |
| Listeria_monocytogenes_1639_v110                         | Listeria_monocytogenes_1639_v107 | 0.9288 |
| Listeria_monocytogenes_1639_v10                          | Listeria_monocytogenes_1639_v107 | 0.9223 |
| Listeria_monocytogenes_1639_v109                         | Listeria_monocytogenes_1639_v107 | 0.9284 |
| Listeria_monocytogenes_1639_v108                         | Listeria_monocytogenes_1639_v107 | 0.9583 |
| Listeria_monocytogenes_1639_v107                         | Listeria_monocytogenes_1639_v107 | 0.0711 |
| Listeria_welshimeri_1643                                 | Listeria_monocytogenes_1639_v108 | 0.875  |
| Listeria_welshimeri_serovar_6b_str_SLCC5334_386043       | Listeria_monocytogenes_1639_v108 | 0.8747 |
| Listeria_seeligeri_serovar_1_2b_str_SLCC3954_683837      | Listeria_monocytogenes_1639_v108 | 0.8798 |
| Listeria_seeligeri_FSL_S4-171_702452                     | Listeria_monocytogenes_1639_v108 | 0.8257 |
| Listeria_seeligeri_FSL_N1-067_702453                     | Listeria_monocytogenes_1639_v108 | 0.8319 |
| Listeria_seeligeri_1640_v1                               | Listeria_monocytogenes_1639_v108 | 0.8874 |
| Listeria_seeligeri_1640                                  | Listeria_monocytogenes_1639_v108 | 0.8908 |
| Listeria_monocytogenes_WSLC1042_1457188                  | Listeria_monocytogenes_1639_v108 | 0.9573 |
| Listeria_monocytogenes_WSLC1001_1457187                  | Listeria_monocytogenes_1639_v108 | 0.93   |
| Listeria_monocytogenes_SLCC7179_879090                   | Listeria_monocytogenes_1639_v108 | 0.9396 |
| Listeria_monocytogenes_SLCC5850_882096                   | Listeria_monocytogenes_1639_v108 | 0.9342 |
| Listeria_monocytogenes_SLCC2755_932919                   | Listeria_monocytogenes_1639_v108 | 0.9397 |
| Listeria_monocytogenes_SLCC2540_879089                   | Listeria_monocytogenes_1639_v108 | 0.942  |
| Listeria_monocytogenes_SLCC2479_882020                   | Listeria_monocytogenes_1639_v108 | 0.929  |
| Listeria_monocytogenes_SLCC2378_879088                   | Listeria_monocytogenes_1639_v108 | 0.9584 |
| Listeria_monocytogenes_SLCC2376_882097                   | Listeria_monocytogenes_1639_v108 | 0.9365 |
| Listeria_monocytogenes_SLCC2372_932920                   | Listeria_monocytogenes_1639_v108 | 0.9218 |
| Listeria_monocytogenes_serotype_4b_str_LL195_1230340     | Listeria_monocytogenes_1639_v108 | 0.9642 |
| Listeria_monocytogenes_serotype_4b_str_LIS0087_1134669   | Listeria_monocytogenes_1639_v108 | 0.9195 |
| Listeria_monocytogenes_serotype_4b_str_F2365_265669      | Listeria_monocytogenes_1639_v108 | 0.9642 |
| Listeria_monocytogenes_serotype_4b_str_CLIP_80459_568819 | Listeria_monocytogenes_1639_v108 | 0.9657 |
| Listeria_monocytogenes_serotype_4b_str_81-0861_1196161   | Listeria_monocytogenes_1639_v108 | 0.9596 |
| Listeria_monocytogenes_serotype_4b_str_81-0592_1196160   | Listeria_monocytogenes_1639_v108 | 0.9607 |
| Listeria_monocytogenes_serotype_4b_str_81-0558_1196159   | Listeria_monocytogenes_1639_v108 | 0.9603 |
| Listeria_monocytogenes_serotype_4b_str_10-0809_1196162   | Listeria_monocytogenes_1639_v108 | 0.9611 |
| Listeria_monocytogenes_serotype_4b_str_02-6680_1196175   | Listeria_monocytogenes_1639_v108 | 0.9631 |
| Listeria_monocytogenes_serotype_4b_str_02-6679_1196174   | Listeria_monocytogenes_1639_v108 | 0.9631 |
| Listeria_monocytogenes_serotype_4b_str_02-1792_1196173   | Listeria_monocytogenes_1639_v108 | 0.9622 |
| Listeria_monocytogenes_serotype_4b_str_02-1289_1196172   | Listeria_monocytogenes_1639_v108 | 0.9622 |
| Listeria_monocytogenes_serotype_4b_str_02-1103_1196171   | Listeria_monocytogenes_1639_v108 | 0.9622 |
| Listeria_monocytogenes_serotype_3c_str_10-5027_1196195   | Listeria_monocytogenes_1639_v108 | 0.9279 |
| Listeria_monocytogenes_serotype_1_2c_str_10-5026_1196194 | Listeria_monocytogenes_1639_v108 | 0.9279 |
| Listeria_monocytogenes_serotype_1_2c_str_10-5025_1196193 | Listeria_monocytogenes_1639_v108 | 0.9279 |
| Listeria_monocytogenes_serotype_1_2b_str_10-0811_1196164 | Listeria_monocytogenes_1639_v108 | 0.9468 |
| Listeria_monocytogenes_serotype_1_2b_str_10-0810_1196163 | Listeria_monocytogenes_1639_v108 | 0.9468 |
| Listeria_monocytogenes_serotype_1_2a_str_99-6370_1196179 | Listeria_monocytogenes_1639_v108 | 0.9188 |
| Listeria_monocytogenes_serotype_1_2a_str_98-2035_1196178 | Listeria_monocytogenes_1639_v108 | 0.9188 |
| Listeria_monocytogenes_serotype_1_2a_str_95-0093_1196177 | Listeria_monocytogenes_1639_v108 | 0.9232 |
| Listeria_monocytogenes_serotype_1_2a_str_88-0478_1196176 | Listeria_monocytogenes_1639_v108 | 0.9224 |
| Listeria_monocytogenes_serotype_1_2a_str_10-5024_1196192 | Listeria_monocytogenes_1639_v108 | 0.9232 |
| Listeria_monocytogenes_serotype_1_2a_str_10-4758_1196168 | Listeria_monocytogenes_1639_v108 | 0.9343 |
| Listeria_monocytogenes_serotype_1_2a_str_10-4754_1196167 | Listeria_monocytogenes_1639_v108 | 0.9343 |
| Listeria_monocytogenes_serotype_1_2a_str_10-1321_1196191 | Listeria_monocytogenes_1639_v108 | 0.9232 |
| Listeria_monocytogenes_serotype_1_2a_str_10-1047_1196190 | Listeria_monocytogenes_1639_v108 | 0.9238 |
| Listeria_monocytogenes_serotype_1_2a_str_10-1046_1196189 | Listeria_monocytogenes_1639_v108 | 0.9238 |



|                                                          |                                  |        |
|----------------------------------------------------------|----------------------------------|--------|
| Listeria_monocytogenes_serotype_1_2a_str_10-0934_1196170 | Listeria_monocytogenes_1639_v108 | 0.9407 |
| Listeria_monocytogenes_serotype_1_2a_str_10-0933_1196169 | Listeria_monocytogenes_1639_v108 | 0.9407 |
| Listeria_monocytogenes_serotype_1_2a_str_10-0815_1196188 | Listeria_monocytogenes_1639_v108 | 0.9195 |
| Listeria_monocytogenes_serotype_1_2a_str_10-0814_1196187 | Listeria_monocytogenes_1639_v108 | 0.9235 |
| Listeria_monocytogenes_serotype_1_2a_str_10-0813_1196166 | Listeria_monocytogenes_1639_v108 | 0.9359 |
| Listeria_monocytogenes_serotype_1_2a_str_10-0812_1196165 | Listeria_monocytogenes_1639_v108 | 0.9359 |
| Listeria_monocytogenes_serotype_1_2a_str_08-7669_1196186 | Listeria_monocytogenes_1639_v108 | 0.9317 |
| Listeria_monocytogenes_serotype_1_2a_str_08-7374_1196185 | Listeria_monocytogenes_1639_v108 | 0.9232 |
| Listeria_monocytogenes_serotype_1_2a_str_08-6997_1196184 | Listeria_monocytogenes_1639_v108 | 0.9195 |
| Listeria_monocytogenes_serotype_1_2a_str_08-6569_1196183 | Listeria_monocytogenes_1639_v108 | 0.9195 |
| Listeria_monocytogenes_serotype_1_2a_str_08-6056_1196182 | Listeria_monocytogenes_1639_v108 | 0.9195 |
| Listeria_monocytogenes_serotype_1_2a_str_04-5457_1196181 | Listeria_monocytogenes_1639_v108 | 0.9232 |
| Listeria_monocytogenes_serotype_1_2a_str_02-5993_1196180 | Listeria_monocytogenes_1639_v108 | 0.9232 |
| Listeria_monocytogenes_R479a_1437838                     | Listeria_monocytogenes_1639_v108 | 0.9203 |
| Listeria_monocytogenes_N53-1_1234142                     | Listeria_monocytogenes_1639_v108 | 0.8925 |
| Listeria_monocytogenes_M7_1030009                        | Listeria_monocytogenes_1639_v108 | 0.914  |
| Listeria_monocytogenes_LO28_393132                       | Listeria_monocytogenes_1639_v108 | 0.9325 |
| Listeria_monocytogenes_L99_563174                        | Listeria_monocytogenes_1639_v108 | 0.9143 |
| Listeria_monocytogenes_L312_882094                       | Listeria_monocytogenes_1639_v108 | 0.9661 |
| Listeria_monocytogenes_J1816_930781                      | Listeria_monocytogenes_1639_v108 | 0.9739 |
| Listeria_monocytogenes_J1-220_930782                     | Listeria_monocytogenes_1639_v108 | 0.9547 |
| Listeria_monocytogenes_J0161_393130                      | Listeria_monocytogenes_1639_v108 | 0.9321 |
| Listeria_monocytogenes_HCC23_552536                      | Listeria_monocytogenes_1639_v108 | 0.9136 |
| Listeria_monocytogenes_FSL_R2-561_393126                 | Listeria_monocytogenes_1639_v108 | 0.9272 |
| Listeria_monocytogenes_FSL_J1-208_393119                 | Listeria_monocytogenes_1639_v108 | 0.9092 |
| Listeria_monocytogenes_FSL_J1-175_393118                 | Listeria_monocytogenes_1639_v108 | 0.9482 |
| Listeria_monocytogenes_Finland_1998_393127               | Listeria_monocytogenes_1639_v108 | 0.9415 |
| Listeria_monocytogenes_EGD-e_169963_v1                   | Listeria_monocytogenes_1639_v108 | 0.9431 |
| Listeria_monocytogenes_EGD-e_169963                      | Listeria_monocytogenes_1639_v108 | 0.9435 |
| Listeria_monocytogenes_EGD_1334565                       | Listeria_monocytogenes_1639_v108 | 0.935  |
| Listeria_monocytogenes_CFSAN002349_1299895               | Listeria_monocytogenes_1639_v108 | 0.9715 |
| Listeria_monocytogenes_ATCC_19117_882095_v1              | Listeria_monocytogenes_1639_v108 | 0.9598 |
| Listeria_monocytogenes_ATCC_19117_882095                 | Listeria_monocytogenes_1639_v108 | 0.9594 |
| Listeria_monocytogenes_6179_1288295                      | Listeria_monocytogenes_1639_v108 | 0.9183 |
| Listeria_monocytogenes_1639_v9                           | Listeria_monocytogenes_1639_v108 | 0.9314 |
| Listeria_monocytogenes_1639_v99                          | Listeria_monocytogenes_1639_v108 | 0.9788 |
| Listeria_monocytogenes_1639_v98                          | Listeria_monocytogenes_1639_v108 | 0.9343 |
| Listeria_monocytogenes_1639_v97                          | Listeria_monocytogenes_1639_v108 | 0.9635 |
| Listeria_monocytogenes_1639_v96                          | Listeria_monocytogenes_1639_v108 | 0.975  |
| Listeria_monocytogenes_1639_v95                          | Listeria_monocytogenes_1639_v108 | 0.9751 |
| Listeria_monocytogenes_1639_v94                          | Listeria_monocytogenes_1639_v108 | 0.9754 |
| Listeria_monocytogenes_1639_v93                          | Listeria_monocytogenes_1639_v108 | 0.919  |
| Listeria_monocytogenes_1639_v92                          | Listeria_monocytogenes_1639_v108 | 0.9814 |
| Listeria_monocytogenes_1639_v91                          | Listeria_monocytogenes_1639_v108 | 0.9597 |
| Listeria_monocytogenes_1639_v90                          | Listeria_monocytogenes_1639_v108 | 0.9343 |
| Listeria_monocytogenes_1639_v8                           | Listeria_monocytogenes_1639_v108 | 0.9098 |
| Listeria_monocytogenes_1639_v89                          | Listeria_monocytogenes_1639_v108 | 0.9796 |
| Listeria_monocytogenes_1639_v88                          | Listeria_monocytogenes_1639_v108 | 0.9285 |
| Listeria_monocytogenes_1639_v87                          | Listeria_monocytogenes_1639_v108 | 0.931  |
| Listeria_monocytogenes_1639_v86                          | Listeria_monocytogenes_1639_v108 | 0.9306 |
| Listeria_monocytogenes_1639_v85                          | Listeria_monocytogenes_1639_v108 | 0.9593 |
| Listeria_monocytogenes_1639_v84                          | Listeria_monocytogenes_1639_v108 | 0.9339 |
| Listeria_monocytogenes_1639_v83                          | Listeria_monocytogenes_1639_v108 | 0.9595 |
| Listeria_monocytogenes_1639_v82                          | Listeria_monocytogenes_1639_v108 | 0.9588 |
| Listeria_monocytogenes_1639_v81                          | Listeria_monocytogenes_1639_v108 | 0.9299 |
| Listeria_monocytogenes_1639_v80                          | Listeria_monocytogenes_1639_v108 | 0.9501 |
| Listeria_monocytogenes_1639_v7                           | Listeria_monocytogenes_1639_v108 | 0.9098 |
| Listeria_monocytogenes_1639_v79                          | Listeria_monocytogenes_1639_v108 | 0.9282 |
| Listeria_monocytogenes_1639_v78                          | Listeria_monocytogenes_1639_v108 | 0.9289 |
| Listeria_monocytogenes_1639_v77                          | Listeria_monocytogenes_1639_v108 | 0.9286 |
| Listeria_monocytogenes_1639_v76                          | Listeria_monocytogenes_1639_v108 | 0.9223 |
| Listeria_monocytogenes_1639_v75                          | Listeria_monocytogenes_1639_v108 | 0.9143 |
| Listeria_monocytogenes_1639_v74                          | Listeria_monocytogenes_1639_v108 | 0.9276 |
| Listeria_monocytogenes_1639_v73                          | Listeria_monocytogenes_1639_v108 | 0.9276 |
| Listeria_monocytogenes_1639_v72                          | Listeria_monocytogenes_1639_v108 | 0.9614 |
| Listeria_monocytogenes_1639_v71                          | Listeria_monocytogenes_1639_v108 | 0.9115 |
| Listeria_monocytogenes_1639_v70                          | Listeria_monocytogenes_1639_v108 | 0.9263 |
| Listeria_monocytogenes_1639_v6                           | Listeria_monocytogenes_1639_v108 | 0.9095 |
| Listeria_monocytogenes_1639_v69                          | Listeria_monocytogenes_1639_v108 | 0.9607 |
| Listeria_monocytogenes_1639_v68                          | Listeria_monocytogenes_1639_v108 | 0.934  |
| Listeria_monocytogenes_1639_v67                          | Listeria_monocytogenes_1639_v108 | 0.9408 |
| Listeria_monocytogenes_1639_v66                          | Listeria_monocytogenes_1639_v108 | 0.9295 |
| Listeria_monocytogenes_1639_v65                          | Listeria_monocytogenes_1639_v108 | 0.9319 |
| Listeria_monocytogenes_1639_v64                          | Listeria_monocytogenes_1639_v108 | 0.9203 |
| Listeria_monocytogenes_1639_v63                          | Listeria_monocytogenes_1639_v108 | 0.9419 |
| Listeria_monocytogenes_1639_v62                          | Listeria_monocytogenes_1639_v108 | 0.9243 |
| Listeria_monocytogenes_1639_v61                          | Listeria_monocytogenes_1639_v108 | 0.9263 |
| Listeria_monocytogenes_1639_v60                          | Listeria_monocytogenes_1639_v108 | 0.9284 |
| Listeria_monocytogenes_1639_v5                           | Listeria_monocytogenes_1639_v108 | 0.9129 |
| Listeria_monocytogenes_1639_v59                          | Listeria_monocytogenes_1639_v108 | 0.9527 |
| Listeria_monocytogenes_1639_v58                          | Listeria_monocytogenes_1639_v108 | 0.9632 |
| Listeria_monocytogenes_1639_v57                          | Listeria_monocytogenes_1639_v108 | 0.9737 |
| Listeria_monocytogenes_1639_v56                          | Listeria_monocytogenes_1639_v108 | 0.9557 |
| Listeria_monocytogenes_1639_v55                          | Listeria_monocytogenes_1639_v108 | 0.9797 |
| Listeria_monocytogenes_1639_v54                          | Listeria_monocytogenes_1639_v108 | 0.9211 |
| Listeria_monocytogenes_1639_v53                          | Listeria_monocytogenes_1639_v108 | 0.9235 |
| Listeria_monocytogenes_1639_v52                          | Listeria_monocytogenes_1639_v108 | 0.96   |
| Listeria_monocytogenes_1639_v51                          | Listeria_monocytogenes_1639_v108 | 0.9556 |
| Listeria_monocytogenes_1639_v50                          | Listeria_monocytogenes_1639_v108 | 0.9224 |
| Listeria_monocytogenes_1639_v4                           | Listeria_monocytogenes_1639_v108 | 0.9262 |
| Listeria_monocytogenes_1639_v49                          | Listeria_monocytogenes_1639_v108 | 0.9499 |



|                                                          |                                  |        |
|----------------------------------------------------------|----------------------------------|--------|
| Listeria_monocytogenes_1639_v145                         | Listeria_monocytogenes_1639_v108 | 0.9337 |
| Listeria_monocytogenes_1639_v144                         | Listeria_monocytogenes_1639_v108 | 0.9653 |
| Listeria_monocytogenes_1639_v143                         | Listeria_monocytogenes_1639_v108 | 0.9405 |
| Listeria_monocytogenes_1639_v142                         | Listeria_monocytogenes_1639_v108 | 0.9657 |
| Listeria_monocytogenes_1639_v141                         | Listeria_monocytogenes_1639_v108 | 0.9599 |
| Listeria_monocytogenes_1639_v140                         | Listeria_monocytogenes_1639_v108 | 0.9665 |
| Listeria_monocytogenes_1639_v13                          | Listeria_monocytogenes_1639_v108 | 0.9334 |
| Listeria_monocytogenes_1639_v139                         | Listeria_monocytogenes_1639_v108 | 0.965  |
| Listeria_monocytogenes_1639_v138                         | Listeria_monocytogenes_1639_v108 | 0.9688 |
| Listeria_monocytogenes_1639_v137                         | Listeria_monocytogenes_1639_v108 | 0.9684 |
| Listeria_monocytogenes_1639_v136                         | Listeria_monocytogenes_1639_v108 | 0.934  |
| Listeria_monocytogenes_1639_v135                         | Listeria_monocytogenes_1639_v108 | 0.9245 |
| Listeria_monocytogenes_1639_v134                         | Listeria_monocytogenes_1639_v108 | 0.9583 |
| Listeria_monocytogenes_1639_v133                         | Listeria_monocytogenes_1639_v108 | 0.933  |
| Listeria_monocytogenes_1639_v132                         | Listeria_monocytogenes_1639_v108 | 0.9249 |
| Listeria_monocytogenes_1639_v131                         | Listeria_monocytogenes_1639_v108 | 0.9977 |
| Listeria_monocytogenes_1639_v130                         | Listeria_monocytogenes_1639_v108 | 0.9242 |
| Listeria_monocytogenes_1639_v12                          | Listeria_monocytogenes_1639_v108 | 0.9094 |
| Listeria_monocytogenes_1639_v129                         | Listeria_monocytogenes_1639_v108 | 0.9573 |
| Listeria_monocytogenes_1639_v128                         | Listeria_monocytogenes_1639_v108 | 0.9559 |
| Listeria_monocytogenes_1639_v127                         | Listeria_monocytogenes_1639_v108 | 0.9408 |
| Listeria_monocytogenes_1639_v126                         | Listeria_monocytogenes_1639_v108 | 0.954  |
| Listeria_monocytogenes_1639_v125                         | Listeria_monocytogenes_1639_v108 | 0.936  |
| Listeria_monocytogenes_1639_v124                         | Listeria_monocytogenes_1639_v108 | 0.93   |
| Listeria_monocytogenes_1639_v123                         | Listeria_monocytogenes_1639_v108 | 0.9715 |
| Listeria_monocytogenes_1639_v122                         | Listeria_monocytogenes_1639_v108 | 0.9715 |
| Listeria_monocytogenes_1639_v121                         | Listeria_monocytogenes_1639_v108 | 0.9715 |
| Listeria_monocytogenes_1639_v120                         | Listeria_monocytogenes_1639_v108 | 0.9715 |
| Listeria_monocytogenes_1639_v11                          | Listeria_monocytogenes_1639_v108 | 0.9143 |
| Listeria_monocytogenes_1639_v119                         | Listeria_monocytogenes_1639_v108 | 0.9715 |
| Listeria_monocytogenes_1639_v118                         | Listeria_monocytogenes_1639_v108 | 0.9715 |
| Listeria_monocytogenes_1639_v117                         | Listeria_monocytogenes_1639_v108 | 0.9313 |
| Listeria_monocytogenes_1639_v116                         | Listeria_monocytogenes_1639_v108 | 0.958  |
| Listeria_monocytogenes_1639_v115                         | Listeria_monocytogenes_1639_v108 | 0.9584 |
| Listeria_monocytogenes_1639_v114                         | Listeria_monocytogenes_1639_v108 | 0.9287 |
| Listeria_monocytogenes_1639_v113                         | Listeria_monocytogenes_1639_v108 | 0.9527 |
| Listeria_monocytogenes_1639_v112                         | Listeria_monocytogenes_1639_v108 | 0.9616 |
| Listeria_monocytogenes_1639_v111                         | Listeria_monocytogenes_1639_v108 | 0.9439 |
| Listeria_monocytogenes_1639_v110                         | Listeria_monocytogenes_1639_v108 | 0.9358 |
| Listeria_monocytogenes_1639_v10                          | Listeria_monocytogenes_1639_v108 | 0.9248 |
| Listeria_monocytogenes_1639_v109                         | Listeria_monocytogenes_1639_v108 | 0.9291 |
| Listeria_monocytogenes_1639_v108                         | Listeria_monocytogenes_1639_v108 | 0.065  |
| Listeria_welshimeri_1643                                 | Listeria_monocytogenes_1639_v109 | 0.8732 |
| Listeria_welshimeri_serovar_6b_str_SLCC5334_386043       | Listeria_monocytogenes_1639_v109 | 0.8729 |
| Listeria_seeligeri_serovar_1_2b_str_SLCC3954_683837      | Listeria_monocytogenes_1639_v109 | 0.8783 |
| Listeria_seeligeri_FSL_S4-171_702452                     | Listeria_monocytogenes_1639_v109 | 0.8223 |
| Listeria_seeligeri_FSL_N1-067_702453                     | Listeria_monocytogenes_1639_v109 | 0.8381 |
| Listeria_seeligeri_1640_v1                               | Listeria_monocytogenes_1639_v109 | 0.8749 |
| Listeria_seeligeri_1640                                  | Listeria_monocytogenes_1639_v109 | 0.8736 |
| Listeria_monocytogenes_WSLC1042_1457188                  | Listeria_monocytogenes_1639_v109 | 0.9222 |
| Listeria_monocytogenes_WSLC1001_1457187                  | Listeria_monocytogenes_1639_v109 | 0.9786 |
| Listeria_monocytogenes_SLCC7179_879090                   | Listeria_monocytogenes_1639_v109 | 0.9537 |
| Listeria_monocytogenes_SLCC5850_882096                   | Listeria_monocytogenes_1639_v109 | 0.9804 |
| Listeria_monocytogenes_SLCC2755_932919                   | Listeria_monocytogenes_1639_v109 | 0.9273 |
| Listeria_monocytogenes_SLCC2540_879089                   | Listeria_monocytogenes_1639_v109 | 0.9413 |
| Listeria_monocytogenes_SLCC2479_882020                   | Listeria_monocytogenes_1639_v109 | 0.9589 |
| Listeria_monocytogenes_SLCC2378_879088                   | Listeria_monocytogenes_1639_v109 | 0.9233 |
| Listeria_monocytogenes_SLCC2376_882097                   | Listeria_monocytogenes_1639_v109 | 0.9361 |
| Listeria_monocytogenes_SLCC2372_932920                   | Listeria_monocytogenes_1639_v109 | 0.9511 |
| Listeria_monocytogenes_serotype_4b_str_LL195_1230340     | Listeria_monocytogenes_1639_v109 | 0.9293 |
| Listeria_monocytogenes_serotype_4b_str_LIS0087_1134669   | Listeria_monocytogenes_1639_v109 | 0.9604 |
| Listeria_monocytogenes_serotype_4b_str_F2365_265669      | Listeria_monocytogenes_1639_v109 | 0.9293 |
| Listeria_monocytogenes_serotype_4b_str_CLIP_80459_568819 | Listeria_monocytogenes_1639_v109 | 0.936  |
| Listeria_monocytogenes_serotype_4b_str_81-0861_1196161   | Listeria_monocytogenes_1639_v109 | 0.9185 |
| Listeria_monocytogenes_serotype_4b_str_81-0592_1196160   | Listeria_monocytogenes_1639_v109 | 0.9196 |
| Listeria_monocytogenes_serotype_4b_str_81-0558_1196159   | Listeria_monocytogenes_1639_v109 | 0.9199 |
| Listeria_monocytogenes_serotype_4b_str_10-0809_1196162   | Listeria_monocytogenes_1639_v109 | 0.9196 |
| Listeria_monocytogenes_serotype_4b_str_02-6680_1196175   | Listeria_monocytogenes_1639_v109 | 0.9346 |
| Listeria_monocytogenes_serotype_4b_str_02-6679_1196174   | Listeria_monocytogenes_1639_v109 | 0.9346 |
| Listeria_monocytogenes_serotype_4b_str_02-1792_1196173   | Listeria_monocytogenes_1639_v109 | 0.9196 |
| Listeria_monocytogenes_serotype_4b_str_02-1289_1196172   | Listeria_monocytogenes_1639_v109 | 0.9196 |
| Listeria_monocytogenes_serotype_4b_str_02-1103_1196171   | Listeria_monocytogenes_1639_v109 | 0.9196 |
| Listeria_monocytogenes_serotype_3c_str_10-5027_1196195   | Listeria_monocytogenes_1639_v109 | 0.9645 |
| Listeria_monocytogenes_serotype_1_2c_str_10-5026_1196194 | Listeria_monocytogenes_1639_v109 | 0.9653 |
| Listeria_monocytogenes_serotype_1_2c_str_10-5025_1196193 | Listeria_monocytogenes_1639_v109 | 0.9653 |
| Listeria_monocytogenes_serotype_1_2b_str_10-0811_1196164 | Listeria_monocytogenes_1639_v109 | 0.9398 |
| Listeria_monocytogenes_serotype_1_2b_str_10-0810_1196163 | Listeria_monocytogenes_1639_v109 | 0.9398 |
| Listeria_monocytogenes_serotype_1_2a_str_99-6370_1196179 | Listeria_monocytogenes_1639_v109 | 0.955  |
| Listeria_monocytogenes_serotype_1_2a_str_98-2035_1196178 | Listeria_monocytogenes_1639_v109 | 0.955  |
| Listeria_monocytogenes_serotype_1_2a_str_95-0093_1196177 | Listeria_monocytogenes_1639_v109 | 0.9603 |
| Listeria_monocytogenes_serotype_1_2a_str_88-0478_1196176 | Listeria_monocytogenes_1639_v109 | 0.9573 |
| Listeria_monocytogenes_serotype_1_2a_str_10-5024_1196192 | Listeria_monocytogenes_1639_v109 | 0.9603 |
| Listeria_monocytogenes_serotype_1_2a_str_10-4758_1196168 | Listeria_monocytogenes_1639_v109 | 0.9597 |
| Listeria_monocytogenes_serotype_1_2a_str_10-4754_1196167 | Listeria_monocytogenes_1639_v109 | 0.96   |
| Listeria_monocytogenes_serotype_1_2a_str_10-1321_1196191 | Listeria_monocytogenes_1639_v109 | 0.9603 |
| Listeria_monocytogenes_serotype_1_2a_str_10-1047_1196190 | Listeria_monocytogenes_1639_v109 | 0.9581 |
| Listeria_monocytogenes_serotype_1_2a_str_10-1046_1196189 | Listeria_monocytogenes_1639_v109 | 0.9581 |
| Listeria_monocytogenes_serotype_1_2a_str_10-0934_1196170 | Listeria_monocytogenes_1639_v109 | 0.9664 |
| Listeria_monocytogenes_serotype_1_2a_str_10-0933_1196169 | Listeria_monocytogenes_1639_v109 | 0.9664 |
| Listeria_monocytogenes_serotype_1_2a_str_10-0815_1196188 | Listeria_monocytogenes_1639_v109 | 0.9557 |
| Listeria_monocytogenes_serotype_1_2a_str_10-0814_1196187 | Listeria_monocytogenes_1639_v109 | 0.9603 |

|                                                          |                                  |        |
|----------------------------------------------------------|----------------------------------|--------|
| Listeria_monocytogenes_serotype_1_2a_str_10-0813_1196166 | Listeria_monocytogenes_1639_v109 | 0.9794 |
| Listeria_monocytogenes_serotype_1_2a_str_10-0812_1196165 | Listeria_monocytogenes_1639_v109 | 0.9794 |
| Listeria_monocytogenes_serotype_1_2a_str_08-7669_1196186 | Listeria_monocytogenes_1639_v109 | 0.9535 |
| Listeria_monocytogenes_serotype_1_2a_str_08-7374_1196185 | Listeria_monocytogenes_1639_v109 | 0.9603 |
| Listeria_monocytogenes_serotype_1_2a_str_08-6997_1196184 | Listeria_monocytogenes_1639_v109 | 0.9557 |
| Listeria_monocytogenes_serotype_1_2a_str_08-6569_1196183 | Listeria_monocytogenes_1639_v109 | 0.9557 |
| Listeria_monocytogenes_serotype_1_2a_str_08-6056_1196182 | Listeria_monocytogenes_1639_v109 | 0.9557 |
| Listeria_monocytogenes_serotype_1_2a_str_04-5457_1196181 | Listeria_monocytogenes_1639_v109 | 0.9603 |
| Listeria_monocytogenes_serotype_1_2a_str_02-5993_1196180 | Listeria_monocytogenes_1639_v109 | 0.9603 |
| Listeria_monocytogenes_R479a_1437838                     | Listeria_monocytogenes_1639_v109 | 0.9574 |
| Listeria_monocytogenes_N53-1_1234142                     | Listeria_monocytogenes_1639_v109 | 0.9035 |
| Listeria_monocytogenes_M7_1030009                        | Listeria_monocytogenes_1639_v109 | 0.9111 |
| Listeria_monocytogenes_LO28_393132                       | Listeria_monocytogenes_1639_v109 | 0.9541 |
| Listeria_monocytogenes_L99_563174                        | Listeria_monocytogenes_1639_v109 | 0.9114 |
| Listeria_monocytogenes_L312_882094                       | Listeria_monocytogenes_1639_v109 | 0.936  |
| Listeria_monocytogenes_J1816_930781                      | Listeria_monocytogenes_1639_v109 | 0.9285 |
| Listeria_monocytogenes_J1-220_930782                     | Listeria_monocytogenes_1639_v109 | 0.9254 |
| Listeria_monocytogenes_J0161_393130                      | Listeria_monocytogenes_1639_v109 | 0.95   |
| Listeria_monocytogenes_HCC23_552536                      | Listeria_monocytogenes_1639_v109 | 0.9107 |
| Listeria_monocytogenes_FSL_R2-561_393126                 | Listeria_monocytogenes_1639_v109 | 0.9612 |
| Listeria_monocytogenes_FSL_J1-208_393119                 | Listeria_monocytogenes_1639_v109 | 0.9014 |
| Listeria_monocytogenes_FSL_J1-175_393118                 | Listeria_monocytogenes_1639_v109 | 0.9456 |
| Listeria_monocytogenes_Finland_1998_393127               | Listeria_monocytogenes_1639_v109 | 0.9537 |
| Listeria_monocytogenes_EGD-e_169963_v1                   | Listeria_monocytogenes_1639_v109 | 0.9522 |
| Listeria_monocytogenes_EGD-e_169963                      | Listeria_monocytogenes_1639_v109 | 0.9522 |
| Listeria_monocytogenes_EGD_1334565                       | Listeria_monocytogenes_1639_v109 | 0.9811 |
| Listeria_monocytogenes_CFSAN002349_1299895               | Listeria_monocytogenes_1639_v109 | 0.9347 |
| Listeria_monocytogenes_ATCC_19117_882095_v1              | Listeria_monocytogenes_1639_v109 | 0.9299 |
| Listeria_monocytogenes_ATCC_19117_882095                 | Listeria_monocytogenes_1639_v109 | 0.9295 |
| Listeria_monocytogenes_6179_1288295                      | Listeria_monocytogenes_1639_v109 | 0.9511 |
| Listeria_monocytogenes_1639_v9                           | Listeria_monocytogenes_1639_v109 | 0.9322 |
| Listeria_monocytogenes_1639_v99                          | Listeria_monocytogenes_1639_v109 | 0.9285 |
| Listeria_monocytogenes_1639_v98                          | Listeria_monocytogenes_1639_v109 | 0.9492 |
| Listeria_monocytogenes_1639_v97                          | Listeria_monocytogenes_1639_v109 | 0.935  |
| Listeria_monocytogenes_1639_v96                          | Listeria_monocytogenes_1639_v109 | 0.9282 |
| Listeria_monocytogenes_1639_v95                          | Listeria_monocytogenes_1639_v109 | 0.9282 |
| Listeria_monocytogenes_1639_v94                          | Listeria_monocytogenes_1639_v109 | 0.9289 |
| Listeria_monocytogenes_1639_v93                          | Listeria_monocytogenes_1639_v109 | 0.9473 |
| Listeria_monocytogenes_1639_v92                          | Listeria_monocytogenes_1639_v109 | 0.9293 |
| Listeria_monocytogenes_1639_v91                          | Listeria_monocytogenes_1639_v109 | 0.925  |
| Listeria_monocytogenes_1639_v90                          | Listeria_monocytogenes_1639_v109 | 0.9492 |
| Listeria_monocytogenes_1639_v8                           | Listeria_monocytogenes_1639_v109 | 0.9472 |
| Listeria_monocytogenes_1639_v89                          | Listeria_monocytogenes_1639_v109 | 0.9321 |
| Listeria_monocytogenes_1639_v88                          | Listeria_monocytogenes_1639_v109 | 0.9708 |
| Listeria_monocytogenes_1639_v87                          | Listeria_monocytogenes_1639_v109 | 0.9754 |
| Listeria_monocytogenes_1639_v86                          | Listeria_monocytogenes_1639_v109 | 0.975  |
| Listeria_monocytogenes_1639_v85                          | Listeria_monocytogenes_1639_v109 | 0.9186 |
| Listeria_monocytogenes_1639_v84                          | Listeria_monocytogenes_1639_v109 | 0.9681 |
| Listeria_monocytogenes_1639_v83                          | Listeria_monocytogenes_1639_v109 | 0.9243 |
| Listeria_monocytogenes_1639_v82                          | Listeria_monocytogenes_1639_v109 | 0.924  |
| Listeria_monocytogenes_1639_v81                          | Listeria_monocytogenes_1639_v109 | 0.9629 |
| Listeria_monocytogenes_1639_v80                          | Listeria_monocytogenes_1639_v109 | 0.9392 |
| Listeria_monocytogenes_1639_v7                           | Listeria_monocytogenes_1639_v109 | 0.9472 |
| Listeria_monocytogenes_1639_v79                          | Listeria_monocytogenes_1639_v109 | 0.9581 |
| Listeria_monocytogenes_1639_v78                          | Listeria_monocytogenes_1639_v109 | 0.9626 |
| Listeria_monocytogenes_1639_v77                          | Listeria_monocytogenes_1639_v109 | 0.9534 |
| Listeria_monocytogenes_1639_v76                          | Listeria_monocytogenes_1639_v109 | 0.9536 |
| Listeria_monocytogenes_1639_v75                          | Listeria_monocytogenes_1639_v109 | 0.9114 |
| Listeria_monocytogenes_1639_v74                          | Listeria_monocytogenes_1639_v109 | 0.9594 |
| Listeria_monocytogenes_1639_v73                          | Listeria_monocytogenes_1639_v109 | 0.9514 |
| Listeria_monocytogenes_1639_v72                          | Listeria_monocytogenes_1639_v109 | 0.9224 |
| Listeria_monocytogenes_1639_v71                          | Listeria_monocytogenes_1639_v109 | 0.9482 |
| Listeria_monocytogenes_1639_v70                          | Listeria_monocytogenes_1639_v109 | 0.9602 |
| Listeria_monocytogenes_1639_v6                           | Listeria_monocytogenes_1639_v109 | 0.9469 |
| Listeria_monocytogenes_1639_v69                          | Listeria_monocytogenes_1639_v109 | 0.9196 |
| Listeria_monocytogenes_1639_v68                          | Listeria_monocytogenes_1639_v109 | 0.9434 |
| Listeria_monocytogenes_1639_v67                          | Listeria_monocytogenes_1639_v109 | 0.9472 |
| Listeria_monocytogenes_1639_v66                          | Listeria_monocytogenes_1639_v109 | 0.9578 |
| Listeria_monocytogenes_1639_v65                          | Listeria_monocytogenes_1639_v109 | 0.9561 |
| Listeria_monocytogenes_1639_v64                          | Listeria_monocytogenes_1639_v109 | 0.9544 |
| Listeria_monocytogenes_1639_v63                          | Listeria_monocytogenes_1639_v109 | 0.9442 |
| Listeria_monocytogenes_1639_v62                          | Listeria_monocytogenes_1639_v109 | 0.9605 |
| Listeria_monocytogenes_1639_v61                          | Listeria_monocytogenes_1639_v109 | 0.9606 |
| Listeria_monocytogenes_1639_v60                          | Listeria_monocytogenes_1639_v109 | 0.9521 |
| Listeria_monocytogenes_1639_v5                           | Listeria_monocytogenes_1639_v109 | 0.8937 |
| Listeria_monocytogenes_1639_v59                          | Listeria_monocytogenes_1639_v109 | 0.9288 |
| Listeria_monocytogenes_1639_v58                          | Listeria_monocytogenes_1639_v109 | 0.9254 |
| Listeria_monocytogenes_1639_v57                          | Listeria_monocytogenes_1639_v109 | 0.9259 |
| Listeria_monocytogenes_1639_v56                          | Listeria_monocytogenes_1639_v109 | 0.9318 |
| Listeria_monocytogenes_1639_v55                          | Listeria_monocytogenes_1639_v109 | 0.9221 |
| Listeria_monocytogenes_1639_v54                          | Listeria_monocytogenes_1639_v109 | 0.9257 |
| Listeria_monocytogenes_1639_v53                          | Listeria_monocytogenes_1639_v109 | 0.9404 |
| Listeria_monocytogenes_1639_v52                          | Listeria_monocytogenes_1639_v109 | 0.9309 |
| Listeria_monocytogenes_1639_v51                          | Listeria_monocytogenes_1639_v109 | 0.9218 |
| Listeria_monocytogenes_1639_v50                          | Listeria_monocytogenes_1639_v109 | 0.9588 |
| Listeria_monocytogenes_1639_v4                           | Listeria_monocytogenes_1639_v109 | 0.9066 |
| Listeria_monocytogenes_1639_v49                          | Listeria_monocytogenes_1639_v109 | 0.9174 |
| Listeria_monocytogenes_1639_v48                          | Listeria_monocytogenes_1639_v109 | 0.9592 |
| Listeria_monocytogenes_1639_v47                          | Listeria_monocytogenes_1639_v109 | 0.957  |
| Listeria_monocytogenes_1639_v46                          | Listeria_monocytogenes_1639_v109 | 0.9499 |
| Listeria_monocytogenes_1639_v45                          | Listeria_monocytogenes_1639_v109 | 0.9504 |

[illegible]

|                                                          |                                  |        |
|----------------------------------------------------------|----------------------------------|--------|
| Listeria_monocytogenes_1639_v141                         | Listeria_monocytogenes_1639_v109 | 0.9432 |
| Listeria_monocytogenes_1639_v140                         | Listeria_monocytogenes_1639_v109 | 0.9364 |
| Listeria_monocytogenes_1639_v13                          | Listeria_monocytogenes_1639_v109 | 0.9243 |
| Listeria_monocytogenes_1639_v139                         | Listeria_monocytogenes_1639_v109 | 0.9342 |
| Listeria_monocytogenes_1639_v138                         | Listeria_monocytogenes_1639_v109 | 0.9387 |
| Listeria_monocytogenes_1639_v137                         | Listeria_monocytogenes_1639_v109 | 0.9383 |
| Listeria_monocytogenes_1639_v136                         | Listeria_monocytogenes_1639_v109 | 0.9589 |
| Listeria_monocytogenes_1639_v135                         | Listeria_monocytogenes_1639_v109 | 0.9084 |
| Listeria_monocytogenes_1639_v134                         | Listeria_monocytogenes_1639_v109 | 0.9231 |
| Listeria_monocytogenes_1639_v133                         | Listeria_monocytogenes_1639_v109 | 0.9603 |
| Listeria_monocytogenes_1639_v132                         | Listeria_monocytogenes_1639_v109 | 0.9085 |
| Listeria_monocytogenes_1639_v131                         | Listeria_monocytogenes_1639_v109 | 0.9289 |
| Listeria_monocytogenes_1639_v130                         | Listeria_monocytogenes_1639_v109 | 0.9492 |
| Listeria_monocytogenes_1639_v12                          | Listeria_monocytogenes_1639_v109 | 0.9416 |
| Listeria_monocytogenes_1639_v129                         | Listeria_monocytogenes_1639_v109 | 0.9391 |
| Listeria_monocytogenes_1639_v128                         | Listeria_monocytogenes_1639_v109 | 0.9396 |
| Listeria_monocytogenes_1639_v127                         | Listeria_monocytogenes_1639_v109 | 0.9529 |
| Listeria_monocytogenes_1639_v126                         | Listeria_monocytogenes_1639_v109 | 0.9404 |
| Listeria_monocytogenes_1639_v125                         | Listeria_monocytogenes_1639_v109 | 0.9573 |
| Listeria_monocytogenes_1639_v124                         | Listeria_monocytogenes_1639_v109 | 0.9206 |
| Listeria_monocytogenes_1639_v123                         | Listeria_monocytogenes_1639_v109 | 0.9347 |
| Listeria_monocytogenes_1639_v122                         | Listeria_monocytogenes_1639_v109 | 0.9343 |
| Listeria_monocytogenes_1639_v121                         | Listeria_monocytogenes_1639_v109 | 0.9343 |
| Listeria_monocytogenes_1639_v120                         | Listeria_monocytogenes_1639_v109 | 0.9343 |
| Listeria_monocytogenes_1639_v11                          | Listeria_monocytogenes_1639_v109 | 0.9481 |
| Listeria_monocytogenes_1639_v119                         | Listeria_monocytogenes_1639_v109 | 0.9343 |
| Listeria_monocytogenes_1639_v118                         | Listeria_monocytogenes_1639_v109 | 0.9343 |
| Listeria_monocytogenes_1639_v117                         | Listeria_monocytogenes_1639_v109 | 0.96   |
| Listeria_monocytogenes_1639_v116                         | Listeria_monocytogenes_1639_v109 | 0.9237 |
| Listeria_monocytogenes_1639_v115                         | Listeria_monocytogenes_1639_v109 | 0.9233 |
| Listeria_monocytogenes_1639_v114                         | Listeria_monocytogenes_1639_v109 | 0.9835 |
| Listeria_monocytogenes_1639_v113                         | Listeria_monocytogenes_1639_v109 | 0.9474 |
| Listeria_monocytogenes_1639_v112                         | Listeria_monocytogenes_1639_v109 | 0.9319 |
| Listeria_monocytogenes_1639_v111                         | Listeria_monocytogenes_1639_v109 | 0.935  |
| Listeria_monocytogenes_1639_v110                         | Listeria_monocytogenes_1639_v109 | 0.9764 |
| Listeria_monocytogenes_1639_v10                          | Listeria_monocytogenes_1639_v109 | 0.9274 |
| Listeria_monocytogenes_1639_v109                         | Listeria_monocytogenes_1639_v109 | 0.0694 |
| Listeria_welshimeri_1643                                 | Listeria_monocytogenes_1639_v10  | 0.8534 |
| Listeria_welshimeri_serovar_6b_str_SLCC5334_386043       | Listeria_monocytogenes_1639_v10  | 0.8531 |
| Listeria_seeligeri_serovar_1_2b_str_SLCC3954_683837      | Listeria_monocytogenes_1639_v10  | 0.8589 |
| Listeria_seeligeri_FSL_S4-171_702452                     | Listeria_monocytogenes_1639_v10  | 0.8024 |
| Listeria_seeligeri_FSL_N1-067_702453                     | Listeria_monocytogenes_1639_v10  | 0.8185 |
| Listeria_seeligeri_1640_v1                               | Listeria_monocytogenes_1639_v10  | 0.8599 |
| Listeria_seeligeri_1640                                  | Listeria_monocytogenes_1639_v10  | 0.8705 |
| Listeria_monocytogenes_WSLC1042_1457188                  | Listeria_monocytogenes_1639_v10  | 0.9214 |
| Listeria_monocytogenes_WSLC1001_1457187                  | Listeria_monocytogenes_1639_v10  | 0.9236 |
| Listeria_monocytogenes_SLCC7179_879090                   | Listeria_monocytogenes_1639_v10  | 0.9158 |
| Listeria_monocytogenes_SLCC5850_882096                   | Listeria_monocytogenes_1639_v10  | 0.9232 |
| Listeria_monocytogenes_SLCC2755_932919                   | Listeria_monocytogenes_1639_v10  | 0.9301 |
| Listeria_monocytogenes_SLCC2540_879089                   | Listeria_monocytogenes_1639_v10  | 0.9397 |
| Listeria_monocytogenes_SLCC2479_882020                   | Listeria_monocytogenes_1639_v10  | 0.9263 |
| Listeria_monocytogenes_SLCC2378_879088                   | Listeria_monocytogenes_1639_v10  | 0.9221 |
| Listeria_monocytogenes_SLCC2376_882097                   | Listeria_monocytogenes_1639_v10  | 0.9105 |
| Listeria_monocytogenes_SLCC2372_932920                   | Listeria_monocytogenes_1639_v10  | 0.9199 |
| Listeria_monocytogenes_serotype_4b_str_LL195_1230340     | Listeria_monocytogenes_1639_v10  | 0.9275 |
| Listeria_monocytogenes_serotype_4b_str_LIS0087_1134669   | Listeria_monocytogenes_1639_v10  | 0.9047 |
| Listeria_monocytogenes_serotype_4b_str_F2365_265669      | Listeria_monocytogenes_1639_v10  | 0.9275 |
| Listeria_monocytogenes_serotype_4b_str_CLIP_80459_568819 | Listeria_monocytogenes_1639_v10  | 0.9293 |
| Listeria_monocytogenes_serotype_4b_str_81-0861_1196161   | Listeria_monocytogenes_1639_v10  | 0.9163 |
| Listeria_monocytogenes_serotype_4b_str_81-0592_1196160   | Listeria_monocytogenes_1639_v10  | 0.9173 |
| Listeria_monocytogenes_serotype_4b_str_81-0558_1196159   | Listeria_monocytogenes_1639_v10  | 0.9177 |
| Listeria_monocytogenes_serotype_4b_str_10-0809_1196162   | Listeria_monocytogenes_1639_v10  | 0.9173 |
| Listeria_monocytogenes_serotype_4b_str_02-6680_1196175   | Listeria_monocytogenes_1639_v10  | 0.9253 |
| Listeria_monocytogenes_serotype_4b_str_02-6679_1196174   | Listeria_monocytogenes_1639_v10  | 0.9253 |
| Listeria_monocytogenes_serotype_4b_str_02-1792_1196173   | Listeria_monocytogenes_1639_v10  | 0.9188 |
| Listeria_monocytogenes_serotype_4b_str_02-1289_1196172   | Listeria_monocytogenes_1639_v10  | 0.9188 |
| Listeria_monocytogenes_serotype_4b_str_02-1103_1196171   | Listeria_monocytogenes_1639_v10  | 0.9188 |
| Listeria_monocytogenes_serotype_3c_str_10-5027_1196195   | Listeria_monocytogenes_1639_v10  | 0.9295 |
| Listeria_monocytogenes_serotype_1_2c_str_10-5026_1196194 | Listeria_monocytogenes_1639_v10  | 0.9299 |
| Listeria_monocytogenes_serotype_1_2c_str_10-5025_1196193 | Listeria_monocytogenes_1639_v10  | 0.9299 |
| Listeria_monocytogenes_serotype_1_2b_str_10-0811_1196164 | Listeria_monocytogenes_1639_v10  | 0.9509 |
| Listeria_monocytogenes_serotype_1_2b_str_10-0810_1196163 | Listeria_monocytogenes_1639_v10  | 0.9509 |
| Listeria_monocytogenes_serotype_1_2a_str_99-6370_1196179 | Listeria_monocytogenes_1639_v10  | 0.9182 |
| Listeria_monocytogenes_serotype_1_2a_str_98-2035_1196178 | Listeria_monocytogenes_1639_v10  | 0.9182 |
| Listeria_monocytogenes_serotype_1_2a_str_95-0093_1196177 | Listeria_monocytogenes_1639_v10  | 0.9217 |
| Listeria_monocytogenes_serotype_1_2a_str_88-0478_1196176 | Listeria_monocytogenes_1639_v10  | 0.9205 |
| Listeria_monocytogenes_serotype_1_2a_str_10-5024_1196192 | Listeria_monocytogenes_1639_v10  | 0.922  |
| Listeria_monocytogenes_serotype_1_2a_str_10-4758_1196168 | Listeria_monocytogenes_1639_v10  | 0.9255 |
| Listeria_monocytogenes_serotype_1_2a_str_10-4754_1196167 | Listeria_monocytogenes_1639_v10  | 0.9259 |
| Listeria_monocytogenes_serotype_1_2a_str_10-1321_1196191 | Listeria_monocytogenes_1639_v10  | 0.922  |
| Listeria_monocytogenes_serotype_1_2a_str_10-1047_1196190 | Listeria_monocytogenes_1639_v10  | 0.9227 |
| Listeria_monocytogenes_serotype_1_2a_str_10-1046_1196189 | Listeria_monocytogenes_1639_v10  | 0.9227 |
| Listeria_monocytogenes_serotype_1_2a_str_10-0934_1196170 | Listeria_monocytogenes_1639_v10  | 0.9197 |
| Listeria_monocytogenes_serotype_1_2a_str_10-0933_1196169 | Listeria_monocytogenes_1639_v10  | 0.9197 |
| Listeria_monocytogenes_serotype_1_2a_str_10-0815_1196188 | Listeria_monocytogenes_1639_v10  | 0.9188 |
| Listeria_monocytogenes_serotype_1_2a_str_10-0814_1196187 | Listeria_monocytogenes_1639_v10  | 0.9224 |
| Listeria_monocytogenes_serotype_1_2a_str_10-0813_1196166 | Listeria_monocytogenes_1639_v10  | 0.9219 |
| Listeria_monocytogenes_serotype_1_2a_str_10-0812_1196165 | Listeria_monocytogenes_1639_v10  | 0.9219 |
| Listeria_monocytogenes_serotype_1_2a_str_08-7669_1196186 | Listeria_monocytogenes_1639_v10  | 0.9157 |
| Listeria_monocytogenes_serotype_1_2a_str_08-7374_1196185 | Listeria_monocytogenes_1639_v10  | 0.922  |
| Listeria_monocytogenes_serotype_1_2a_str_08-6997_1196184 | Listeria_monocytogenes_1639_v10  | 0.9188 |



|                                                          |                                 |        |
|----------------------------------------------------------|---------------------------------|--------|
| Listeria_monocytogenes_serotype_1_2a_str_08-6569_1196183 | Listeria_monocytogenes_1639_v10 | 0.9188 |
| Listeria_monocytogenes_serotype_1_2a_str_08-6056_1196182 | Listeria_monocytogenes_1639_v10 | 0.9188 |
| Listeria_monocytogenes_serotype_1_2a_str_04-5457_1196181 | Listeria_monocytogenes_1639_v10 | 0.922  |
| Listeria_monocytogenes_serotype_1_2a_str_02-5993_1196180 | Listeria_monocytogenes_1639_v10 | 0.922  |
| Listeria_monocytogenes_R479a_1437838                     | Listeria_monocytogenes_1639_v10 | 0.9203 |
| Listeria_monocytogenes_N53-1_1234142                     | Listeria_monocytogenes_1639_v10 | 0.8703 |
| Listeria_monocytogenes_M7_1030009                        | Listeria_monocytogenes_1639_v10 | 0.895  |
| Listeria_monocytogenes_LO28_393132                       | Listeria_monocytogenes_1639_v10 | 0.9209 |
| Listeria_monocytogenes_L99_563174                        | Listeria_monocytogenes_1639_v10 | 0.8953 |
| Listeria_monocytogenes_L312_882094                       | Listeria_monocytogenes_1639_v10 | 0.9297 |
| Listeria_monocytogenes_J1816_930781                      | Listeria_monocytogenes_1639_v10 | 0.9213 |
| Listeria_monocytogenes_J1-220_930782                     | Listeria_monocytogenes_1639_v10 | 0.9194 |
| Listeria_monocytogenes_J0161_393130                      | Listeria_monocytogenes_1639_v10 | 0.9158 |
| Listeria_monocytogenes_HCC23_552536                      | Listeria_monocytogenes_1639_v10 | 0.895  |
| Listeria_monocytogenes_FSL_R2-561_393126                 | Listeria_monocytogenes_1639_v10 | 0.9263 |
| Listeria_monocytogenes_FSL_J1-208_393119                 | Listeria_monocytogenes_1639_v10 | 0.8799 |
| Listeria_monocytogenes_FSL_J1-175_393118                 | Listeria_monocytogenes_1639_v10 | 0.9409 |
| Listeria_monocytogenes_Finland_1998_393127               | Listeria_monocytogenes_1639_v10 | 0.9204 |
| Listeria_monocytogenes_EGD-e_169963_v1                   | Listeria_monocytogenes_1639_v10 | 0.9168 |
| Listeria_monocytogenes_EGD-e_169963                      | Listeria_monocytogenes_1639_v10 | 0.9168 |
| Listeria_monocytogenes_EGD_1334565                       | Listeria_monocytogenes_1639_v10 | 0.9239 |
| Listeria_monocytogenes_CFSAN002349_1299895               | Listeria_monocytogenes_1639_v10 | 0.9299 |
| Listeria_monocytogenes_ATCC_19117_882095_v1              | Listeria_monocytogenes_1639_v10 | 0.9237 |
| Listeria_monocytogenes_ATCC_19117_882095                 | Listeria_monocytogenes_1639_v10 | 0.9233 |
| Listeria_monocytogenes_6179_1288295                      | Listeria_monocytogenes_1639_v10 | 0.9108 |
| Listeria_monocytogenes_1639_v9                           | Listeria_monocytogenes_1639_v10 | 0.9491 |
| Listeria_monocytogenes_1639_v99                          | Listeria_monocytogenes_1639_v10 | 0.9224 |
| Listeria_monocytogenes_1639_v98                          | Listeria_monocytogenes_1639_v10 | 0.9172 |
| Listeria_monocytogenes_1639_v97                          | Listeria_monocytogenes_1639_v10 | 0.9255 |
| Listeria_monocytogenes_1639_v96                          | Listeria_monocytogenes_1639_v10 | 0.9214 |
| Listeria_monocytogenes_1639_v95                          | Listeria_monocytogenes_1639_v10 | 0.9214 |
| Listeria_monocytogenes_1639_v94                          | Listeria_monocytogenes_1639_v10 | 0.9217 |
| Listeria_monocytogenes_1639_v93                          | Listeria_monocytogenes_1639_v10 | 0.9136 |
| Listeria_monocytogenes_1639_v92                          | Listeria_monocytogenes_1639_v10 | 0.9225 |
| Listeria_monocytogenes_1639_v91                          | Listeria_monocytogenes_1639_v10 | 0.9241 |
| Listeria_monocytogenes_1639_v90                          | Listeria_monocytogenes_1639_v10 | 0.9172 |
| Listeria_monocytogenes_1639_v8                           | Listeria_monocytogenes_1639_v10 | 0.9237 |
| Listeria_monocytogenes_1639_v89                          | Listeria_monocytogenes_1639_v10 | 0.927  |
| Listeria_monocytogenes_1639_v88                          | Listeria_monocytogenes_1639_v10 | 0.925  |
| Listeria_monocytogenes_1639_v87                          | Listeria_monocytogenes_1639_v10 | 0.9183 |
| Listeria_monocytogenes_1639_v86                          | Listeria_monocytogenes_1639_v10 | 0.9176 |
| Listeria_monocytogenes_1639_v85                          | Listeria_monocytogenes_1639_v10 | 0.9171 |
| Listeria_monocytogenes_1639_v84                          | Listeria_monocytogenes_1639_v10 | 0.9255 |
| Listeria_monocytogenes_1639_v83                          | Listeria_monocytogenes_1639_v10 | 0.9187 |
| Listeria_monocytogenes_1639_v82                          | Listeria_monocytogenes_1639_v10 | 0.9184 |
| Listeria_monocytogenes_1639_v81                          | Listeria_monocytogenes_1639_v10 | 0.9257 |
| Listeria_monocytogenes_1639_v80                          | Listeria_monocytogenes_1639_v10 | 0.9571 |
| Listeria_monocytogenes_1639_v7                           | Listeria_monocytogenes_1639_v10 | 0.9237 |
| Listeria_monocytogenes_1639_v79                          | Listeria_monocytogenes_1639_v10 | 0.9244 |
| Listeria_monocytogenes_1639_v78                          | Listeria_monocytogenes_1639_v10 | 0.9254 |
| Listeria_monocytogenes_1639_v77                          | Listeria_monocytogenes_1639_v10 | 0.9122 |
| Listeria_monocytogenes_1639_v76                          | Listeria_monocytogenes_1639_v10 | 0.9219 |
| Listeria_monocytogenes_1639_v75                          | Listeria_monocytogenes_1639_v10 | 0.8953 |
| Listeria_monocytogenes_1639_v74                          | Listeria_monocytogenes_1639_v10 | 0.9019 |
| Listeria_monocytogenes_1639_v73                          | Listeria_monocytogenes_1639_v10 | 0.9169 |
| Listeria_monocytogenes_1639_v72                          | Listeria_monocytogenes_1639_v10 | 0.9168 |
| Listeria_monocytogenes_1639_v71                          | Listeria_monocytogenes_1639_v10 | 0.9139 |
| Listeria_monocytogenes_1639_v70                          | Listeria_monocytogenes_1639_v10 | 0.9265 |
| Listeria_monocytogenes_1639_v6                           | Listeria_monocytogenes_1639_v10 | 0.9233 |
| Listeria_monocytogenes_1639_v69                          | Listeria_monocytogenes_1639_v10 | 0.9173 |
| Listeria_monocytogenes_1639_v68                          | Listeria_monocytogenes_1639_v10 | 0.9088 |
| Listeria_monocytogenes_1639_v67                          | Listeria_monocytogenes_1639_v10 | 0.94   |
| Listeria_monocytogenes_1639_v66                          | Listeria_monocytogenes_1639_v10 | 0.9227 |
| Listeria_monocytogenes_1639_v65                          | Listeria_monocytogenes_1639_v10 | 0.9192 |
| Listeria_monocytogenes_1639_v64                          | Listeria_monocytogenes_1639_v10 | 0.9174 |
| Listeria_monocytogenes_1639_v63                          | Listeria_monocytogenes_1639_v10 | 0.9563 |
| Listeria_monocytogenes_1639_v62                          | Listeria_monocytogenes_1639_v10 | 0.9227 |
| Listeria_monocytogenes_1639_v61                          | Listeria_monocytogenes_1639_v10 | 0.9236 |
| Listeria_monocytogenes_1639_v60                          | Listeria_monocytogenes_1639_v10 | 0.918  |
| Listeria_monocytogenes_1639_v5                           | Listeria_monocytogenes_1639_v10 | 0.9415 |
| Listeria_monocytogenes_1639_v59                          | Listeria_monocytogenes_1639_v10 | 0.9245 |
| Listeria_monocytogenes_1639_v58                          | Listeria_monocytogenes_1639_v10 | 0.923  |
| Listeria_monocytogenes_1639_v57                          | Listeria_monocytogenes_1639_v10 | 0.9398 |
| Listeria_monocytogenes_1639_v56                          | Listeria_monocytogenes_1639_v10 | 0.923  |
| Listeria_monocytogenes_1639_v55                          | Listeria_monocytogenes_1639_v10 | 0.9173 |
| Listeria_monocytogenes_1639_v54                          | Listeria_monocytogenes_1639_v10 | 0.8986 |
| Listeria_monocytogenes_1639_v53                          | Listeria_monocytogenes_1639_v10 | 0.9062 |
| Listeria_monocytogenes_1639_v52                          | Listeria_monocytogenes_1639_v10 | 0.9248 |
| Listeria_monocytogenes_1639_v51                          | Listeria_monocytogenes_1639_v10 | 0.9129 |
| Listeria_monocytogenes_1639_v50                          | Listeria_monocytogenes_1639_v10 | 0.9217 |
| Listeria_monocytogenes_1639_v4                           | Listeria_monocytogenes_1639_v10 | 0.9549 |
| Listeria_monocytogenes_1639_v49                          | Listeria_monocytogenes_1639_v10 | 0.9196 |
| Listeria_monocytogenes_1639_v48                          | Listeria_monocytogenes_1639_v10 | 0.926  |
| Listeria_monocytogenes_1639_v47                          | Listeria_monocytogenes_1639_v10 | 0.9206 |
| Listeria_monocytogenes_1639_v46                          | Listeria_monocytogenes_1639_v10 | 0.9155 |
| Listeria_monocytogenes_1639_v45                          | Listeria_monocytogenes_1639_v10 | 0.9131 |
| Listeria_monocytogenes_1639_v44                          | Listeria_monocytogenes_1639_v10 | 0.922  |
| Listeria_monocytogenes_1639_v43                          | Listeria_monocytogenes_1639_v10 | 0.922  |
| Listeria_monocytogenes_1639_v42                          | Listeria_monocytogenes_1639_v10 | 0.9037 |
| Listeria_monocytogenes_1639_v41                          | Listeria_monocytogenes_1639_v10 | 0.8976 |
| Listeria_monocytogenes_1639_v40                          | Listeria_monocytogenes_1639_v10 | 0.9209 |

[illegible]

|                                                          |                                  |        |
|----------------------------------------------------------|----------------------------------|--------|
| Listeria_monocytogenes_1639_v137                         | Listeria_monocytogenes_1639_v10  | 0.9312 |
| Listeria_monocytogenes_1639_v136                         | Listeria_monocytogenes_1639_v10  | 0.9274 |
| Listeria_monocytogenes_1639_v135                         | Listeria_monocytogenes_1639_v10  | 0.8899 |
| Listeria_monocytogenes_1639_v134                         | Listeria_monocytogenes_1639_v10  | 0.9226 |
| Listeria_monocytogenes_1639_v133                         | Listeria_monocytogenes_1639_v10  | 0.9234 |
| Listeria_monocytogenes_1639_v132                         | Listeria_monocytogenes_1639_v10  | 0.889  |
| Listeria_monocytogenes_1639_v131                         | Listeria_monocytogenes_1639_v10  | 0.9239 |
| Listeria_monocytogenes_1639_v130                         | Listeria_monocytogenes_1639_v10  | 0.9193 |
| Listeria_monocytogenes_1639_v12                          | Listeria_monocytogenes_1639_v10  | 0.9243 |
| Listeria_monocytogenes_1639_v129                         | Listeria_monocytogenes_1639_v10  | 0.9494 |
| Listeria_monocytogenes_1639_v128                         | Listeria_monocytogenes_1639_v10  | 0.9332 |
| Listeria_monocytogenes_1639_v127                         | Listeria_monocytogenes_1639_v10  | 0.9161 |
| Listeria_monocytogenes_1639_v126                         | Listeria_monocytogenes_1639_v10  | 0.9314 |
| Listeria_monocytogenes_1639_v125                         | Listeria_monocytogenes_1639_v10  | 0.915  |
| Listeria_monocytogenes_1639_v124                         | Listeria_monocytogenes_1639_v10  | 0.9014 |
| Listeria_monocytogenes_1639_v123                         | Listeria_monocytogenes_1639_v10  | 0.9299 |
| Listeria_monocytogenes_1639_v122                         | Listeria_monocytogenes_1639_v10  | 0.9299 |
| Listeria_monocytogenes_1639_v121                         | Listeria_monocytogenes_1639_v10  | 0.9299 |
| Listeria_monocytogenes_1639_v120                         | Listeria_monocytogenes_1639_v10  | 0.9299 |
| Listeria_monocytogenes_1639_v11                          | Listeria_monocytogenes_1639_v10  | 0.9077 |
| Listeria_monocytogenes_1639_v119                         | Listeria_monocytogenes_1639_v10  | 0.9299 |
| Listeria_monocytogenes_1639_v118                         | Listeria_monocytogenes_1639_v10  | 0.9299 |
| Listeria_monocytogenes_1639_v117                         | Listeria_monocytogenes_1639_v10  | 0.9256 |
| Listeria_monocytogenes_1639_v116                         | Listeria_monocytogenes_1639_v10  | 0.9221 |
| Listeria_monocytogenes_1639_v115                         | Listeria_monocytogenes_1639_v10  | 0.9221 |
| Listeria_monocytogenes_1639_v114                         | Listeria_monocytogenes_1639_v10  | 0.9252 |
| Listeria_monocytogenes_1639_v113                         | Listeria_monocytogenes_1639_v10  | 0.9597 |
| Listeria_monocytogenes_1639_v112                         | Listeria_monocytogenes_1639_v10  | 0.9297 |
| Listeria_monocytogenes_1639_v111                         | Listeria_monocytogenes_1639_v10  | 0.9221 |
| Listeria_monocytogenes_1639_v110                         | Listeria_monocytogenes_1639_v10  | 0.9205 |
| Listeria_monocytogenes_1639_v10                          | Listeria_monocytogenes_1639_v10  | 0.0714 |
| Listeria_welshimeri_1643                                 | Listeria_monocytogenes_1639_v110 | 0.8705 |
| Listeria_welshimeri_serovar_6b_str_SLCC5334_386043       | Listeria_monocytogenes_1639_v110 | 0.8699 |
| Listeria_seeligeri_serovar_1_2b_str_SLCC3954_683837      | Listeria_monocytogenes_1639_v110 | 0.878  |
| Listeria_seeligeri_FSL_S4-171_702452                     | Listeria_monocytogenes_1639_v110 | 0.8153 |
| Listeria_seeligeri_FSL_N1-067_702453                     | Listeria_monocytogenes_1639_v110 | 0.828  |
| Listeria_seeligeri_1640_v1                               | Listeria_monocytogenes_1639_v110 | 0.8757 |
| Listeria_seeligeri_1640                                  | Listeria_monocytogenes_1639_v110 | 0.8774 |
| Listeria_monocytogenes_WSLC1042_1457188                  | Listeria_monocytogenes_1639_v110 | 0.9223 |
| Listeria_monocytogenes_WSLC1001_1457187                  | Listeria_monocytogenes_1639_v110 | 0.9801 |
| Listeria_monocytogenes_SLCC7179_879090                   | Listeria_monocytogenes_1639_v110 | 0.9617 |
| Listeria_monocytogenes_SLCC5850_882096                   | Listeria_monocytogenes_1639_v110 | 0.98   |
| Listeria_monocytogenes_SLCC2755_932919                   | Listeria_monocytogenes_1639_v110 | 0.9277 |
| Listeria_monocytogenes_SLCC2540_879089                   | Listeria_monocytogenes_1639_v110 | 0.9398 |
| Listeria_monocytogenes_SLCC2479_882020                   | Listeria_monocytogenes_1639_v110 | 0.9541 |
| Listeria_monocytogenes_SLCC2378_879088                   | Listeria_monocytogenes_1639_v110 | 0.9237 |
| Listeria_monocytogenes_SLCC2376_882097                   | Listeria_monocytogenes_1639_v110 | 0.9358 |
| Listeria_monocytogenes_SLCC2372_932920                   | Listeria_monocytogenes_1639_v110 | 0.947  |
| Listeria_monocytogenes_serotype_4b_str_LL195_1230340     | Listeria_monocytogenes_1639_v110 | 0.9296 |
| Listeria_monocytogenes_serotype_4b_str_LIS0087_1134669   | Listeria_monocytogenes_1639_v110 | 0.9825 |
| Listeria_monocytogenes_serotype_4b_str_F2365_265669      | Listeria_monocytogenes_1639_v110 | 0.9296 |
| Listeria_monocytogenes_serotype_4b_str_CLIP_80459_568819 | Listeria_monocytogenes_1639_v110 | 0.9364 |
| Listeria_monocytogenes_serotype_4b_str_81-0861_1196161   | Listeria_monocytogenes_1639_v110 | 0.9256 |
| Listeria_monocytogenes_serotype_4b_str_81-0592_1196160   | Listeria_monocytogenes_1639_v110 | 0.9267 |
| Listeria_monocytogenes_serotype_4b_str_81-0558_1196159   | Listeria_monocytogenes_1639_v110 | 0.9274 |
| Listeria_monocytogenes_serotype_4b_str_10-0809_1196162   | Listeria_monocytogenes_1639_v110 | 0.9267 |
| Listeria_monocytogenes_serotype_4b_str_02-6680_1196175   | Listeria_monocytogenes_1639_v110 | 0.9347 |
| Listeria_monocytogenes_serotype_4b_str_02-6679_1196174   | Listeria_monocytogenes_1639_v110 | 0.9347 |
| Listeria_monocytogenes_serotype_4b_str_02-1792_1196173   | Listeria_monocytogenes_1639_v110 | 0.927  |
| Listeria_monocytogenes_serotype_4b_str_02-1289_1196172   | Listeria_monocytogenes_1639_v110 | 0.927  |
| Listeria_monocytogenes_serotype_4b_str_02-1103_1196171   | Listeria_monocytogenes_1639_v110 | 0.927  |
| Listeria_monocytogenes_serotype_3c_str_10-5027_1196195   | Listeria_monocytogenes_1639_v110 | 0.9507 |
| Listeria_monocytogenes_serotype_1_2c_str_10-5026_1196194 | Listeria_monocytogenes_1639_v110 | 0.9518 |
| Listeria_monocytogenes_serotype_1_2c_str_10-5025_1196193 | Listeria_monocytogenes_1639_v110 | 0.9518 |
| Listeria_monocytogenes_serotype_1_2b_str_10-0811_1196164 | Listeria_monocytogenes_1639_v110 | 0.9435 |
| Listeria_monocytogenes_serotype_1_2b_str_10-0810_1196163 | Listeria_monocytogenes_1639_v110 | 0.9435 |
| Listeria_monocytogenes_serotype_1_2a_str_99-6370_1196179 | Listeria_monocytogenes_1639_v110 | 0.9447 |
| Listeria_monocytogenes_serotype_1_2a_str_98-2035_1196178 | Listeria_monocytogenes_1639_v110 | 0.9447 |
| Listeria_monocytogenes_serotype_1_2a_str_95-0093_1196177 | Listeria_monocytogenes_1639_v110 | 0.9496 |
| Listeria_monocytogenes_serotype_1_2a_str_88-0478_1196176 | Listeria_monocytogenes_1639_v110 | 0.9492 |
| Listeria_monocytogenes_serotype_1_2a_str_10-5024_1196192 | Listeria_monocytogenes_1639_v110 | 0.9503 |
| Listeria_monocytogenes_serotype_1_2a_str_10-4758_1196168 | Listeria_monocytogenes_1639_v110 | 0.9604 |
| Listeria_monocytogenes_serotype_1_2a_str_10-4754_1196167 | Listeria_monocytogenes_1639_v110 | 0.9604 |
| Listeria_monocytogenes_serotype_1_2a_str_10-1321_1196191 | Listeria_monocytogenes_1639_v110 | 0.9503 |
| Listeria_monocytogenes_serotype_1_2a_str_10-1047_1196190 | Listeria_monocytogenes_1639_v110 | 0.9503 |
| Listeria_monocytogenes_serotype_1_2a_str_10-1046_1196189 | Listeria_monocytogenes_1639_v110 | 0.9503 |
| Listeria_monocytogenes_serotype_1_2a_str_10-0934_1196170 | Listeria_monocytogenes_1639_v110 | 0.966  |
| Listeria_monocytogenes_serotype_1_2a_str_10-0933_1196169 | Listeria_monocytogenes_1639_v110 | 0.966  |
| Listeria_monocytogenes_serotype_1_2a_str_10-0815_1196188 | Listeria_monocytogenes_1639_v110 | 0.9461 |
| Listeria_monocytogenes_serotype_1_2a_str_10-0814_1196187 | Listeria_monocytogenes_1639_v110 | 0.9503 |
| Listeria_monocytogenes_serotype_1_2a_str_10-0813_1196166 | Listeria_monocytogenes_1639_v110 | 0.9831 |
| Listeria_monocytogenes_serotype_1_2a_str_10-0812_1196165 | Listeria_monocytogenes_1639_v110 | 0.9831 |
| Listeria_monocytogenes_serotype_1_2a_str_08-7669_1196186 | Listeria_monocytogenes_1639_v110 | 0.9494 |
| Listeria_monocytogenes_serotype_1_2a_str_08-7374_1196185 | Listeria_monocytogenes_1639_v110 | 0.9503 |
| Listeria_monocytogenes_serotype_1_2a_str_08-6997_1196184 | Listeria_monocytogenes_1639_v110 | 0.9461 |
| Listeria_monocytogenes_serotype_1_2a_str_08-6569_1196183 | Listeria_monocytogenes_1639_v110 | 0.9461 |
| Listeria_monocytogenes_serotype_1_2a_str_08-6056_1196182 | Listeria_monocytogenes_1639_v110 | 0.9461 |
| Listeria_monocytogenes_serotype_1_2a_str_04-5457_1196181 | Listeria_monocytogenes_1639_v110 | 0.9503 |
| Listeria_monocytogenes_serotype_1_2a_str_02-5993_1196180 | Listeria_monocytogenes_1639_v110 | 0.9499 |
| Listeria_monocytogenes_R479a_1437838                     | Listeria_monocytogenes_1639_v110 | 0.9455 |
| Listeria_monocytogenes_N53-1_1234142                     | Listeria_monocytogenes_1639_v110 | 0.9083 |

|                                             |                                  |        |
|---------------------------------------------|----------------------------------|--------|
| Listeria_monocytogenes_M7_1030009           | Listeria_monocytogenes_1639_v110 | 0.9141 |
| Listeria_monocytogenes_LO28_393132          | Listeria_monocytogenes_1639_v110 | 0.9594 |
| Listeria_monocytogenes_L99_563174           | Listeria_monocytogenes_1639_v110 | 0.9148 |
| Listeria_monocytogenes_L312_882094          | Listeria_monocytogenes_1639_v110 | 0.9364 |
| Listeria_monocytogenes_J1816_930781         | Listeria_monocytogenes_1639_v110 | 0.9221 |
| Listeria_monocytogenes_J1-220_930782        | Listeria_monocytogenes_1639_v110 | 0.928  |
| Listeria_monocytogenes_J0161_393130         | Listeria_monocytogenes_1639_v110 | 0.9512 |
| Listeria_monocytogenes_HCC23_552536         | Listeria_monocytogenes_1639_v110 | 0.9144 |
| Listeria_monocytogenes_FSL_R2-561_393126    | Listeria_monocytogenes_1639_v110 | 0.9493 |
| Listeria_monocytogenes_FSL_J1-208_393119    | Listeria_monocytogenes_1639_v110 | 0.901  |
| Listeria_monocytogenes_FSL_J1-175_393118    | Listeria_monocytogenes_1639_v110 | 0.943  |
| Listeria_monocytogenes_Finland_1998_393127  | Listeria_monocytogenes_1639_v110 | 0.9534 |
| Listeria_monocytogenes_EGD-e_169963_v1      | Listeria_monocytogenes_1639_v110 | 0.9582 |
| Listeria_monocytogenes_EGD-e_169963         | Listeria_monocytogenes_1639_v110 | 0.9586 |
| Listeria_monocytogenes_EGD_1334565          | Listeria_monocytogenes_1639_v110 | 0.9807 |
| Listeria_monocytogenes_CFSAN002349_1299895  | Listeria_monocytogenes_1639_v110 | 0.9347 |
| Listeria_monocytogenes_ATCC_19117_882095_v1 | Listeria_monocytogenes_1639_v110 | 0.9303 |
| Listeria_monocytogenes_ATCC_19117_882095    | Listeria_monocytogenes_1639_v110 | 0.9303 |
| Listeria_monocytogenes_6179_1288295         | Listeria_monocytogenes_1639_v110 | 0.9463 |
| Listeria_monocytogenes_1639_v9              | Listeria_monocytogenes_1639_v110 | 0.9296 |
| Listeria_monocytogenes_1639_v99             | Listeria_monocytogenes_1639_v110 | 0.9248 |
| Listeria_monocytogenes_1639_v98             | Listeria_monocytogenes_1639_v110 | 0.9504 |
| Listeria_monocytogenes_1639_v97             | Listeria_monocytogenes_1639_v110 | 0.9279 |
| Listeria_monocytogenes_1639_v96             | Listeria_monocytogenes_1639_v110 | 0.9215 |
| Listeria_monocytogenes_1639_v95             | Listeria_monocytogenes_1639_v110 | 0.9215 |
| Listeria_monocytogenes_1639_v94             | Listeria_monocytogenes_1639_v110 | 0.9218 |
| Listeria_monocytogenes_1639_v93             | Listeria_monocytogenes_1639_v110 | 0.9436 |
| Listeria_monocytogenes_1639_v92             | Listeria_monocytogenes_1639_v110 | 0.9252 |
| Listeria_monocytogenes_1639_v91             | Listeria_monocytogenes_1639_v110 | 0.9291 |
| Listeria_monocytogenes_1639_v90             | Listeria_monocytogenes_1639_v110 | 0.9504 |
| Listeria_monocytogenes_1639_v8              | Listeria_monocytogenes_1639_v110 | 0.9362 |
| Listeria_monocytogenes_1639_v89             | Listeria_monocytogenes_1639_v110 | 0.9389 |
| Listeria_monocytogenes_1639_v88             | Listeria_monocytogenes_1639_v110 | 0.9671 |
| Listeria_monocytogenes_1639_v87             | Listeria_monocytogenes_1639_v110 | 0.9806 |
| Listeria_monocytogenes_1639_v86             | Listeria_monocytogenes_1639_v110 | 0.9799 |
| Listeria_monocytogenes_1639_v85             | Listeria_monocytogenes_1639_v110 | 0.9253 |
| Listeria_monocytogenes_1639_v84             | Listeria_monocytogenes_1639_v110 | 0.961  |
| Listeria_monocytogenes_1639_v83             | Listeria_monocytogenes_1639_v110 | 0.9315 |
| Listeria_monocytogenes_1639_v82             | Listeria_monocytogenes_1639_v110 | 0.9311 |
| Listeria_monocytogenes_1639_v81             | Listeria_monocytogenes_1639_v110 | 0.9502 |
| Listeria_monocytogenes_1639_v80             | Listeria_monocytogenes_1639_v110 | 0.9467 |
| Listeria_monocytogenes_1639_v7              | Listeria_monocytogenes_1639_v110 | 0.9362 |
| Listeria_monocytogenes_1639_v79             | Listeria_monocytogenes_1639_v110 | 0.9511 |
| Listeria_monocytogenes_1639_v78             | Listeria_monocytogenes_1639_v110 | 0.9499 |
| Listeria_monocytogenes_1639_v77             | Listeria_monocytogenes_1639_v110 | 0.944  |
| Listeria_monocytogenes_1639_v76             | Listeria_monocytogenes_1639_v110 | 0.9484 |
| Listeria_monocytogenes_1639_v75             | Listeria_monocytogenes_1639_v110 | 0.9148 |
| Listeria_monocytogenes_1639_v74             | Listeria_monocytogenes_1639_v110 | 0.9638 |
| Listeria_monocytogenes_1639_v73             | Listeria_monocytogenes_1639_v110 | 0.9522 |
| Listeria_monocytogenes_1639_v72             | Listeria_monocytogenes_1639_v110 | 0.9295 |
| Listeria_monocytogenes_1639_v71             | Listeria_monocytogenes_1639_v110 | 0.9404 |
| Listeria_monocytogenes_1639_v70             | Listeria_monocytogenes_1639_v110 | 0.9479 |
| Listeria_monocytogenes_1639_v6              | Listeria_monocytogenes_1639_v110 | 0.9356 |
| Listeria_monocytogenes_1639_v69             | Listeria_monocytogenes_1639_v110 | 0.927  |
| Listeria_monocytogenes_1639_v68             | Listeria_monocytogenes_1639_v110 | 0.9487 |
| Listeria_monocytogenes_1639_v67             | Listeria_monocytogenes_1639_v110 | 0.9431 |
| Listeria_monocytogenes_1639_v66             | Listeria_monocytogenes_1639_v110 | 0.9567 |
| Listeria_monocytogenes_1639_v65             | Listeria_monocytogenes_1639_v110 | 0.9568 |
| Listeria_monocytogenes_1639_v64             | Listeria_monocytogenes_1639_v110 | 0.9495 |
| Listeria_monocytogenes_1639_v63             | Listeria_monocytogenes_1639_v110 | 0.9345 |
| Listeria_monocytogenes_1639_v62             | Listeria_monocytogenes_1639_v110 | 0.9471 |
| Listeria_monocytogenes_1639_v61             | Listeria_monocytogenes_1639_v110 | 0.952  |
| Listeria_monocytogenes_1639_v60             | Listeria_monocytogenes_1639_v110 | 0.9461 |
| Listeria_monocytogenes_1639_v5              | Listeria_monocytogenes_1639_v110 | 0.9015 |
| Listeria_monocytogenes_1639_v59             | Listeria_monocytogenes_1639_v110 | 0.9284 |
| Listeria_monocytogenes_1639_v58             | Listeria_monocytogenes_1639_v110 | 0.9307 |
| Listeria_monocytogenes_1639_v57             | Listeria_monocytogenes_1639_v110 | 0.9199 |
| Listeria_monocytogenes_1639_v56             | Listeria_monocytogenes_1639_v110 | 0.9258 |
| Listeria_monocytogenes_1639_v55             | Listeria_monocytogenes_1639_v110 | 0.9236 |
| Listeria_monocytogenes_1639_v54             | Listeria_monocytogenes_1639_v110 | 0.9197 |
| Listeria_monocytogenes_1639_v53             | Listeria_monocytogenes_1639_v110 | 0.9386 |
| Listeria_monocytogenes_1639_v52             | Listeria_monocytogenes_1639_v110 | 0.9354 |
| Listeria_monocytogenes_1639_v51             | Listeria_monocytogenes_1639_v110 | 0.9292 |
| Listeria_monocytogenes_1639_v50             | Listeria_monocytogenes_1639_v110 | 0.9492 |
| Listeria_monocytogenes_1639_v4              | Listeria_monocytogenes_1639_v110 | 0.9143 |
| Listeria_monocytogenes_1639_v49             | Listeria_monocytogenes_1639_v110 | 0.9178 |
| Listeria_monocytogenes_1639_v48             | Listeria_monocytogenes_1639_v110 | 0.9473 |
| Listeria_monocytogenes_1639_v47             | Listeria_monocytogenes_1639_v110 | 0.9511 |
| Listeria_monocytogenes_1639_v46             | Listeria_monocytogenes_1639_v110 | 0.9427 |
| Listeria_monocytogenes_1639_v45             | Listeria_monocytogenes_1639_v110 | 0.9409 |
| Listeria_monocytogenes_1639_v44             | Listeria_monocytogenes_1639_v110 | 0.9503 |
| Listeria_monocytogenes_1639_v43             | Listeria_monocytogenes_1639_v110 | 0.9503 |
| Listeria_monocytogenes_1639_v42             | Listeria_monocytogenes_1639_v110 | 0.9347 |
| Listeria_monocytogenes_1639_v41             | Listeria_monocytogenes_1639_v110 | 0.9369 |
| Listeria_monocytogenes_1639_v40             | Listeria_monocytogenes_1639_v110 | 0.9482 |
| Listeria_monocytogenes_1639_v3              | Listeria_monocytogenes_1639_v110 | 0.9146 |
| Listeria_monocytogenes_1639_v39             | Listeria_monocytogenes_1639_v110 | 0.9382 |
| Listeria_monocytogenes_1639_v38             | Listeria_monocytogenes_1639_v110 | 0.9483 |
| Listeria_monocytogenes_1639_v37             | Listeria_monocytogenes_1639_v110 | 0.9412 |
| Listeria_monocytogenes_1639_v36             | Listeria_monocytogenes_1639_v110 | 0.9468 |
| Listeria_monocytogenes_1639_v35             | Listeria_monocytogenes_1639_v110 | 0.9511 |

[illegible]

|                                                          |                                  |        |
|----------------------------------------------------------|----------------------------------|--------|
| Listeria_monocytogenes_1639_v131                         | Listeria_monocytogenes_1639_v110 | 0.9357 |
| Listeria_monocytogenes_1639_v130                         | Listeria_monocytogenes_1639_v110 | 0.9511 |
| Listeria_monocytogenes_1639_v12                          | Listeria_monocytogenes_1639_v110 | 0.9321 |
| Listeria_monocytogenes_1639_v129                         | Listeria_monocytogenes_1639_v110 | 0.9395 |
| Listeria_monocytogenes_1639_v128                         | Listeria_monocytogenes_1639_v110 | 0.9393 |
| Listeria_monocytogenes_1639_v127                         | Listeria_monocytogenes_1639_v110 | 0.9582 |
| Listeria_monocytogenes_1639_v126                         | Listeria_monocytogenes_1639_v110 | 0.94   |
| Listeria_monocytogenes_1639_v125                         | Listeria_monocytogenes_1639_v110 | 0.9508 |
| Listeria_monocytogenes_1639_v124                         | Listeria_monocytogenes_1639_v110 | 0.9206 |
| Listeria_monocytogenes_1639_v123                         | Listeria_monocytogenes_1639_v110 | 0.9347 |
| Listeria_monocytogenes_1639_v122                         | Listeria_monocytogenes_1639_v110 | 0.9347 |
| Listeria_monocytogenes_1639_v121                         | Listeria_monocytogenes_1639_v110 | 0.9347 |
| Listeria_monocytogenes_1639_v120                         | Listeria_monocytogenes_1639_v110 | 0.9343 |
| Listeria_monocytogenes_1639_v11                          | Listeria_monocytogenes_1639_v110 | 0.9437 |
| Listeria_monocytogenes_1639_v119                         | Listeria_monocytogenes_1639_v110 | 0.9347 |
| Listeria_monocytogenes_1639_v118                         | Listeria_monocytogenes_1639_v110 | 0.9347 |
| Listeria_monocytogenes_1639_v117                         | Listeria_monocytogenes_1639_v110 | 0.9567 |
| Listeria_monocytogenes_1639_v116                         | Listeria_monocytogenes_1639_v110 | 0.9237 |
| Listeria_monocytogenes_1639_v115                         | Listeria_monocytogenes_1639_v110 | 0.9233 |
| Listeria_monocytogenes_1639_v114                         | Listeria_monocytogenes_1639_v110 | 0.9797 |
| Listeria_monocytogenes_1639_v113                         | Listeria_monocytogenes_1639_v110 | 0.9474 |
| Listeria_monocytogenes_1639_v112                         | Listeria_monocytogenes_1639_v110 | 0.927  |
| Listeria_monocytogenes_1639_v111                         | Listeria_monocytogenes_1639_v110 | 0.9353 |
| Listeria_monocytogenes_1639_v110                         | Listeria_monocytogenes_1639_v110 | 0.0686 |
| Listeria_welshimeri_1643                                 | Listeria_monocytogenes_1639_v111 | 0.8725 |
| Listeria_welshimeri_serovar_6b_str_SLCC5334_386043       | Listeria_monocytogenes_1639_v111 | 0.8718 |
| Listeria_seeligeri_serovar_1_2b_str_SLCC3954_683837      | Listeria_monocytogenes_1639_v111 | 0.8885 |
| Listeria_seeligeri_FSL_S4-171_702452                     | Listeria_monocytogenes_1639_v111 | 0.8215 |
| Listeria_seeligeri_FSL_N1-067_702453                     | Listeria_monocytogenes_1639_v111 | 0.8343 |
| Listeria_seeligeri_1640_v1                               | Listeria_monocytogenes_1639_v111 | 0.8911 |
| Listeria_seeligeri_1640                                  | Listeria_monocytogenes_1639_v111 | 0.8819 |
| Listeria_monocytogenes_WSLC1042_1457188                  | Listeria_monocytogenes_1639_v111 | 0.9474 |
| Listeria_monocytogenes_WSLC1001_1457187                  | Listeria_monocytogenes_1639_v111 | 0.9363 |
| Listeria_monocytogenes_SLCC7179_879090                   | Listeria_monocytogenes_1639_v111 | 0.9391 |
| Listeria_monocytogenes_SLCC5850_882096                   | Listeria_monocytogenes_1639_v111 | 0.9402 |
| Listeria_monocytogenes_SLCC2755_932919                   | Listeria_monocytogenes_1639_v111 | 0.9797 |
| Listeria_monocytogenes_SLCC2540_879089                   | Listeria_monocytogenes_1639_v111 | 0.9483 |
| Listeria_monocytogenes_SLCC2479_882020                   | Listeria_monocytogenes_1639_v111 | 0.9289 |
| Listeria_monocytogenes_SLCC2378_879088                   | Listeria_monocytogenes_1639_v111 | 0.9488 |
| Listeria_monocytogenes_SLCC2376_882097                   | Listeria_monocytogenes_1639_v111 | 0.9325 |
| Listeria_monocytogenes_SLCC2372_932920                   | Listeria_monocytogenes_1639_v111 | 0.9369 |
| Listeria_monocytogenes_serotype_4b_str_LL195_1230340     | Listeria_monocytogenes_1639_v111 | 0.955  |
| Listeria_monocytogenes_serotype_4b_str_LIS0087_1134669   | Listeria_monocytogenes_1639_v111 | 0.9186 |
| Listeria_monocytogenes_serotype_4b_str_F2365_265669      | Listeria_monocytogenes_1639_v111 | 0.955  |
| Listeria_monocytogenes_serotype_4b_str_CLIP_80459_568819 | Listeria_monocytogenes_1639_v111 | 0.9572 |
| Listeria_monocytogenes_serotype_4b_str_81-0861_1196161   | Listeria_monocytogenes_1639_v111 | 0.9389 |
| Listeria_monocytogenes_serotype_4b_str_81-0592_1196160   | Listeria_monocytogenes_1639_v111 | 0.94   |
| Listeria_monocytogenes_serotype_4b_str_81-0558_1196159   | Listeria_monocytogenes_1639_v111 | 0.9411 |
| Listeria_monocytogenes_serotype_4b_str_10-0809_1196162   | Listeria_monocytogenes_1639_v111 | 0.9404 |
| Listeria_monocytogenes_serotype_4b_str_02-6680_1196175   | Listeria_monocytogenes_1639_v111 | 0.9547 |
| Listeria_monocytogenes_serotype_4b_str_02-6679_1196174   | Listeria_monocytogenes_1639_v111 | 0.9547 |
| Listeria_monocytogenes_serotype_4b_str_02-1792_1196173   | Listeria_monocytogenes_1639_v111 | 0.9404 |
| Listeria_monocytogenes_serotype_4b_str_02-1289_1196172   | Listeria_monocytogenes_1639_v111 | 0.9404 |
| Listeria_monocytogenes_serotype_4b_str_02-1103_1196171   | Listeria_monocytogenes_1639_v111 | 0.9404 |
| Listeria_monocytogenes_serotype_3c_str_10-5027_1196195   | Listeria_monocytogenes_1639_v111 | 0.9289 |
| Listeria_monocytogenes_serotype_1_2c_str_10-5026_1196194 | Listeria_monocytogenes_1639_v111 | 0.9304 |
| Listeria_monocytogenes_serotype_1_2c_str_10-5025_1196193 | Listeria_monocytogenes_1639_v111 | 0.9304 |
| Listeria_monocytogenes_serotype_1_2b_str_10-0811_1196164 | Listeria_monocytogenes_1639_v111 | 0.9463 |
| Listeria_monocytogenes_serotype_1_2b_str_10-0810_1196163 | Listeria_monocytogenes_1639_v111 | 0.9463 |
| Listeria_monocytogenes_serotype_1_2a_str_99-6370_1196179 | Listeria_monocytogenes_1639_v111 | 0.9265 |
| Listeria_monocytogenes_serotype_1_2a_str_98-2035_1196178 | Listeria_monocytogenes_1639_v111 | 0.9265 |
| Listeria_monocytogenes_serotype_1_2a_str_95-0093_1196177 | Listeria_monocytogenes_1639_v111 | 0.923  |
| Listeria_monocytogenes_serotype_1_2a_str_88-0478_1196176 | Listeria_monocytogenes_1639_v111 | 0.9226 |
| Listeria_monocytogenes_serotype_1_2a_str_10-5024_1196192 | Listeria_monocytogenes_1639_v111 | 0.9234 |
| Listeria_monocytogenes_serotype_1_2a_str_10-4758_1196168 | Listeria_monocytogenes_1639_v111 | 0.9361 |
| Listeria_monocytogenes_serotype_1_2a_str_10-4754_1196167 | Listeria_monocytogenes_1639_v111 | 0.9361 |
| Listeria_monocytogenes_serotype_1_2a_str_10-1321_1196191 | Listeria_monocytogenes_1639_v111 | 0.9234 |
| Listeria_monocytogenes_serotype_1_2a_str_10-1047_1196190 | Listeria_monocytogenes_1639_v111 | 0.9234 |
| Listeria_monocytogenes_serotype_1_2a_str_10-1046_1196189 | Listeria_monocytogenes_1639_v111 | 0.9234 |
| Listeria_monocytogenes_serotype_1_2a_str_10-0934_1196170 | Listeria_monocytogenes_1639_v111 | 0.9448 |
| Listeria_monocytogenes_serotype_1_2a_str_10-0933_1196169 | Listeria_monocytogenes_1639_v111 | 0.9448 |
| Listeria_monocytogenes_serotype_1_2a_str_10-0815_1196188 | Listeria_monocytogenes_1639_v111 | 0.9271 |
| Listeria_monocytogenes_serotype_1_2a_str_10-0814_1196187 | Listeria_monocytogenes_1639_v111 | 0.9234 |
| Listeria_monocytogenes_serotype_1_2a_str_10-0813_1196166 | Listeria_monocytogenes_1639_v111 | 0.9335 |
| Listeria_monocytogenes_serotype_1_2a_str_10-0812_1196165 | Listeria_monocytogenes_1639_v111 | 0.9335 |
| Listeria_monocytogenes_serotype_1_2a_str_08-7669_1196186 | Listeria_monocytogenes_1639_v111 | 0.9313 |
| Listeria_monocytogenes_serotype_1_2a_str_08-7374_1196185 | Listeria_monocytogenes_1639_v111 | 0.9234 |
| Listeria_monocytogenes_serotype_1_2a_str_08-6997_1196184 | Listeria_monocytogenes_1639_v111 | 0.9271 |
| Listeria_monocytogenes_serotype_1_2a_str_08-6569_1196183 | Listeria_monocytogenes_1639_v111 | 0.9271 |
| Listeria_monocytogenes_serotype_1_2a_str_08-6056_1196182 | Listeria_monocytogenes_1639_v111 | 0.9271 |
| Listeria_monocytogenes_serotype_1_2a_str_04-5457_1196181 | Listeria_monocytogenes_1639_v111 | 0.9234 |
| Listeria_monocytogenes_serotype_1_2a_str_02-5993_1196180 | Listeria_monocytogenes_1639_v111 | 0.923  |
| Listeria_monocytogenes_R479a_1437838                     | Listeria_monocytogenes_1639_v111 | 0.929  |
| Listeria_monocytogenes_N53-1_1234142                     | Listeria_monocytogenes_1639_v111 | 0.8923 |
| Listeria_monocytogenes_M7_1030009                        | Listeria_monocytogenes_1639_v111 | 0.8979 |
| Listeria_monocytogenes_LO28_393132                       | Listeria_monocytogenes_1639_v111 | 0.9275 |
| Listeria_monocytogenes_L99_563174                        | Listeria_monocytogenes_1639_v111 | 0.8986 |
| Listeria_monocytogenes_L312_882094                       | Listeria_monocytogenes_1639_v111 | 0.9576 |
| Listeria_monocytogenes_J1816_930781                      | Listeria_monocytogenes_1639_v111 | 0.9354 |
| Listeria_monocytogenes_J1-220_930782                     | Listeria_monocytogenes_1639_v111 | 0.9297 |
| Listeria_monocytogenes_J0161_393130                      | Listeria_monocytogenes_1639_v111 | 0.935  |



|                                             |                                  |        |
|---------------------------------------------|----------------------------------|--------|
| Listeria_monocytogenes_HCC23_552536         | Listeria_monocytogenes_1639_v111 | 0.8983 |
| Listeria_monocytogenes_FSL_R2-561_393126    | Listeria_monocytogenes_1639_v111 | 0.9282 |
| Listeria_monocytogenes_FSL_J1-208_393119    | Listeria_monocytogenes_1639_v111 | 0.9061 |
| Listeria_monocytogenes_FSL_J1-175_393118    | Listeria_monocytogenes_1639_v111 | 0.955  |
| Listeria_monocytogenes_Finland_1998_393127  | Listeria_monocytogenes_1639_v111 | 0.9483 |
| Listeria_monocytogenes_EGD-e_169963_v1      | Listeria_monocytogenes_1639_v111 | 0.937  |
| Listeria_monocytogenes_EGD-e_169963         | Listeria_monocytogenes_1639_v111 | 0.9373 |
| Listeria_monocytogenes_EGD_1334565          | Listeria_monocytogenes_1639_v111 | 0.9409 |
| Listeria_monocytogenes_CFSAN002349_1299895  | Listeria_monocytogenes_1639_v111 | 0.9559 |
| Listeria_monocytogenes_ATCC_19117_882095_v1 | Listeria_monocytogenes_1639_v111 | 0.9472 |
| Listeria_monocytogenes_ATCC_19117_882095    | Listeria_monocytogenes_1639_v111 | 0.9472 |
| Listeria_monocytogenes_6179_1288295         | Listeria_monocytogenes_1639_v111 | 0.9266 |
| Listeria_monocytogenes_1639_v9              | Listeria_monocytogenes_1639_v111 | 0.9298 |
| Listeria_monocytogenes_1639_v99             | Listeria_monocytogenes_1639_v111 | 0.9459 |
| Listeria_monocytogenes_1639_v98             | Listeria_monocytogenes_1639_v111 | 0.9375 |
| Listeria_monocytogenes_1639_v97             | Listeria_monocytogenes_1639_v111 | 0.9462 |
| Listeria_monocytogenes_1639_v96             | Listeria_monocytogenes_1639_v111 | 0.9451 |
| Listeria_monocytogenes_1639_v95             | Listeria_monocytogenes_1639_v111 | 0.9452 |
| Listeria_monocytogenes_1639_v94             | Listeria_monocytogenes_1639_v111 | 0.9455 |
| Listeria_monocytogenes_1639_v93             | Listeria_monocytogenes_1639_v111 | 0.9349 |
| Listeria_monocytogenes_1639_v92             | Listeria_monocytogenes_1639_v111 | 0.9462 |
| Listeria_monocytogenes_1639_v91             | Listeria_monocytogenes_1639_v111 | 0.9387 |
| Listeria_monocytogenes_1639_v90             | Listeria_monocytogenes_1639_v111 | 0.9375 |
| Listeria_monocytogenes_1639_v8              | Listeria_monocytogenes_1639_v111 | 0.9206 |
| Listeria_monocytogenes_1639_v89             | Listeria_monocytogenes_1639_v111 | 0.9482 |
| Listeria_monocytogenes_1639_v88             | Listeria_monocytogenes_1639_v111 | 0.9287 |
| Listeria_monocytogenes_1639_v87             | Listeria_monocytogenes_1639_v111 | 0.9282 |
| Listeria_monocytogenes_1639_v86             | Listeria_monocytogenes_1639_v111 | 0.9279 |
| Listeria_monocytogenes_1639_v85             | Listeria_monocytogenes_1639_v111 | 0.9379 |
| Listeria_monocytogenes_1639_v84             | Listeria_monocytogenes_1639_v111 | 0.933  |
| Listeria_monocytogenes_1639_v83             | Listeria_monocytogenes_1639_v111 | 0.9369 |
| Listeria_monocytogenes_1639_v82             | Listeria_monocytogenes_1639_v111 | 0.9366 |
| Listeria_monocytogenes_1639_v81             | Listeria_monocytogenes_1639_v111 | 0.9324 |
| Listeria_monocytogenes_1639_v80             | Listeria_monocytogenes_1639_v111 | 0.9421 |
| Listeria_monocytogenes_1639_v7              | Listeria_monocytogenes_1639_v111 | 0.9206 |
| Listeria_monocytogenes_1639_v79             | Listeria_monocytogenes_1639_v111 | 0.9307 |
| Listeria_monocytogenes_1639_v78             | Listeria_monocytogenes_1639_v111 | 0.9321 |
| Listeria_monocytogenes_1639_v77             | Listeria_monocytogenes_1639_v111 | 0.93   |
| Listeria_monocytogenes_1639_v76             | Listeria_monocytogenes_1639_v111 | 0.93   |
| Listeria_monocytogenes_1639_v75             | Listeria_monocytogenes_1639_v111 | 0.8986 |
| Listeria_monocytogenes_1639_v74             | Listeria_monocytogenes_1639_v111 | 0.929  |
| Listeria_monocytogenes_1639_v73             | Listeria_monocytogenes_1639_v111 | 0.9327 |
| Listeria_monocytogenes_1639_v72             | Listeria_monocytogenes_1639_v111 | 0.9357 |
| Listeria_monocytogenes_1639_v71             | Listeria_monocytogenes_1639_v111 | 0.9236 |
| Listeria_monocytogenes_1639_v70             | Listeria_monocytogenes_1639_v111 | 0.9299 |
| Listeria_monocytogenes_1639_v6              | Listeria_monocytogenes_1639_v111 | 0.92   |
| Listeria_monocytogenes_1639_v69             | Listeria_monocytogenes_1639_v111 | 0.9404 |
| Listeria_monocytogenes_1639_v68             | Listeria_monocytogenes_1639_v111 | 0.9377 |
| Listeria_monocytogenes_1639_v67             | Listeria_monocytogenes_1639_v111 | 0.9501 |
| Listeria_monocytogenes_1639_v66             | Listeria_monocytogenes_1639_v111 | 0.9384 |
| Listeria_monocytogenes_1639_v65             | Listeria_monocytogenes_1639_v111 | 0.9344 |
| Listeria_monocytogenes_1639_v64             | Listeria_monocytogenes_1639_v111 | 0.9367 |
| Listeria_monocytogenes_1639_v63             | Listeria_monocytogenes_1639_v111 | 0.9474 |
| Listeria_monocytogenes_1639_v62             | Listeria_monocytogenes_1639_v111 | 0.9372 |
| Listeria_monocytogenes_1639_v61             | Listeria_monocytogenes_1639_v111 | 0.9254 |
| Listeria_monocytogenes_1639_v60             | Listeria_monocytogenes_1639_v111 | 0.9369 |
| Listeria_monocytogenes_1639_v5              | Listeria_monocytogenes_1639_v111 | 0.9257 |
| Listeria_monocytogenes_1639_v59             | Listeria_monocytogenes_1639_v111 | 0.9391 |
| Listeria_monocytogenes_1639_v58             | Listeria_monocytogenes_1639_v111 | 0.9403 |
| Listeria_monocytogenes_1639_v57             | Listeria_monocytogenes_1639_v111 | 0.9335 |
| Listeria_monocytogenes_1639_v56             | Listeria_monocytogenes_1639_v111 | 0.9384 |
| Listeria_monocytogenes_1639_v55             | Listeria_monocytogenes_1639_v111 | 0.9385 |
| Listeria_monocytogenes_1639_v54             | Listeria_monocytogenes_1639_v111 | 0.9206 |
| Listeria_monocytogenes_1639_v53             | Listeria_monocytogenes_1639_v111 | 0.929  |
| Listeria_monocytogenes_1639_v52             | Listeria_monocytogenes_1639_v111 | 0.9356 |
| Listeria_monocytogenes_1639_v51             | Listeria_monocytogenes_1639_v111 | 0.9406 |
| Listeria_monocytogenes_1639_v50             | Listeria_monocytogenes_1639_v111 | 0.9223 |
| Listeria_monocytogenes_1639_v4              | Listeria_monocytogenes_1639_v111 | 0.9388 |
| Listeria_monocytogenes_1639_v49             | Listeria_monocytogenes_1639_v111 | 0.9397 |
| Listeria_monocytogenes_1639_v48             | Listeria_monocytogenes_1639_v111 | 0.9342 |
| Listeria_monocytogenes_1639_v47             | Listeria_monocytogenes_1639_v111 | 0.9227 |
| Listeria_monocytogenes_1639_v46             | Listeria_monocytogenes_1639_v111 | 0.9381 |
| Listeria_monocytogenes_1639_v45             | Listeria_monocytogenes_1639_v111 | 0.9216 |
| Listeria_monocytogenes_1639_v44             | Listeria_monocytogenes_1639_v111 | 0.9234 |
| Listeria_monocytogenes_1639_v43             | Listeria_monocytogenes_1639_v111 | 0.9    |

[illegible]

|                                                          |                                  |        |
|----------------------------------------------------------|----------------------------------|--------|
| Listeria_monocytogenes_1639_v125                         | Listeria_monocytogenes_1639_v111 | 0.9389 |
| Listeria_monocytogenes_1639_v124                         | Listeria_monocytogenes_1639_v111 | 0.9299 |
| Listeria_monocytogenes_1639_v123                         | Listeria_monocytogenes_1639_v111 | 0.9559 |
| Listeria_monocytogenes_1639_v122                         | Listeria_monocytogenes_1639_v111 | 0.9562 |
| Listeria_monocytogenes_1639_v121                         | Listeria_monocytogenes_1639_v111 | 0.9562 |
| Listeria_monocytogenes_1639_v120                         | Listeria_monocytogenes_1639_v111 | 0.9559 |
| Listeria_monocytogenes_1639_v11                          | Listeria_monocytogenes_1639_v111 | 0.9325 |
| Listeria_monocytogenes_1639_v119                         | Listeria_monocytogenes_1639_v111 | 0.9562 |
| Listeria_monocytogenes_1639_v118                         | Listeria_monocytogenes_1639_v111 | 0.9562 |
| Listeria_monocytogenes_1639_v117                         | Listeria_monocytogenes_1639_v111 | 0.9392 |
| Listeria_monocytogenes_1639_v116                         | Listeria_monocytogenes_1639_v111 | 0.9485 |
| Listeria_monocytogenes_1639_v115                         | Listeria_monocytogenes_1639_v111 | 0.9485 |
| Listeria_monocytogenes_1639_v114                         | Listeria_monocytogenes_1639_v111 | 0.9342 |
| Listeria_monocytogenes_1639_v113                         | Listeria_monocytogenes_1639_v111 | 0.953  |
| Listeria_monocytogenes_1639_v112                         | Listeria_monocytogenes_1639_v111 | 0.9449 |
| Listeria_monocytogenes_1639_v111                         | Listeria_monocytogenes_1639_v111 | 0.0682 |
| Listeria_welshimeri_1643                                 | Listeria_monocytogenes_1639_v112 | 0.8804 |
| Listeria_welshimeri_serovar_6b_str_SLCC5334_386043       | Listeria_monocytogenes_1639_v112 | 0.8801 |
| Listeria_seeligeri_serovar_1_2b_str_SLCC3954_683837      | Listeria_monocytogenes_1639_v112 | 0.8802 |
| Listeria_seeligeri_FSL_S4-171_702452                     | Listeria_monocytogenes_1639_v112 | 0.8339 |
| Listeria_seeligeri_FSL_N1-067_702453                     | Listeria_monocytogenes_1639_v112 | 0.838  |
| Listeria_seeligeri_1640_v1                               | Listeria_monocytogenes_1639_v112 | 0.8905 |
| Listeria_seeligeri_1640                                  | Listeria_monocytogenes_1639_v112 | 0.8849 |
| Listeria_monocytogenes_WSLC1042_1457188                  | Listeria_monocytogenes_1639_v112 | 0.9788 |
| Listeria_monocytogenes_WSLC1001_1457187                  | Listeria_monocytogenes_1639_v112 | 0.9264 |
| Listeria_monocytogenes_SLCC7179_879090                   | Listeria_monocytogenes_1639_v112 | 0.9357 |
| Listeria_monocytogenes_SLCC5850_882096                   | Listeria_monocytogenes_1639_v112 | 0.9307 |
| Listeria_monocytogenes_SLCC2755_932919                   | Listeria_monocytogenes_1639_v112 | 0.9402 |
| Listeria_monocytogenes_SLCC2540_879089                   | Listeria_monocytogenes_1639_v112 | 0.946  |
| Listeria_monocytogenes_SLCC2479_882020                   | Listeria_monocytogenes_1639_v112 | 0.9318 |
| Listeria_monocytogenes_SLCC2378_879088                   | Listeria_monocytogenes_1639_v112 | 0.9795 |
| Listeria_monocytogenes_SLCC2376_882097                   | Listeria_monocytogenes_1639_v112 | 0.9359 |
| Listeria_monocytogenes_SLCC2372_932920                   | Listeria_monocytogenes_1639_v112 | 0.9249 |
| Listeria_monocytogenes_serotype_4b_str_LL195_1230340     | Listeria_monocytogenes_1639_v112 | 0.9859 |
| Listeria_monocytogenes_serotype_4b_str_LIS0087_1134669   | Listeria_monocytogenes_1639_v112 | 0.9098 |
| Listeria_monocytogenes_serotype_4b_str_F2365_265669      | Listeria_monocytogenes_1639_v112 | 0.9859 |
| Listeria_monocytogenes_serotype_4b_str_CLIP_80459_568819 | Listeria_monocytogenes_1639_v112 | 0.9671 |
| Listeria_monocytogenes_serotype_4b_str_81-0861_1196161   | Listeria_monocytogenes_1639_v112 | 0.9786 |
| Listeria_monocytogenes_serotype_4b_str_81-0592_1196160   | Listeria_monocytogenes_1639_v112 | 0.9797 |
| Listeria_monocytogenes_serotype_4b_str_81-0558_1196159   | Listeria_monocytogenes_1639_v112 | 0.9805 |
| Listeria_monocytogenes_serotype_4b_str_10-0809_1196162   | Listeria_monocytogenes_1639_v112 | 0.9801 |
| Listeria_monocytogenes_serotype_4b_str_02-6680_1196175   | Listeria_monocytogenes_1639_v112 | 0.968  |
| Listeria_monocytogenes_serotype_4b_str_02-6679_1196174   | Listeria_monocytogenes_1639_v112 | 0.968  |
| Listeria_monocytogenes_serotype_4b_str_02-1792_1196173   | Listeria_monocytogenes_1639_v112 | 0.976  |
| Listeria_monocytogenes_serotype_4b_str_02-1289_1196172   | Listeria_monocytogenes_1639_v112 | 0.976  |
| Listeria_monocytogenes_serotype_4b_str_02-1103_1196171   | Listeria_monocytogenes_1639_v112 | 0.976  |
| Listeria_monocytogenes_serotype_3c_str_10-5027_1196195   | Listeria_monocytogenes_1639_v112 | 0.9318 |
| Listeria_monocytogenes_serotype_1_2c_str_10-5026_1196194 | Listeria_monocytogenes_1639_v112 | 0.9329 |
| Listeria_monocytogenes_serotype_1_2c_str_10-5025_1196193 | Listeria_monocytogenes_1639_v112 | 0.9329 |
| Listeria_monocytogenes_serotype_1_2b_str_10-0811_1196164 | Listeria_monocytogenes_1639_v112 | 0.9433 |
| Listeria_monocytogenes_serotype_1_2b_str_10-0810_1196163 | Listeria_monocytogenes_1639_v112 | 0.9433 |
| Listeria_monocytogenes_serotype_1_2a_str_99-6370_1196179 | Listeria_monocytogenes_1639_v112 | 0.9197 |
| Listeria_monocytogenes_serotype_1_2a_str_98-2035_1196178 | Listeria_monocytogenes_1639_v112 | 0.9197 |
| Listeria_monocytogenes_serotype_1_2a_str_95-0093_1196177 | Listeria_monocytogenes_1639_v112 | 0.9245 |
| Listeria_monocytogenes_serotype_1_2a_str_88-0478_1196176 | Listeria_monocytogenes_1639_v112 | 0.9244 |
| Listeria_monocytogenes_serotype_1_2a_str_10-5024_1196192 | Listeria_monocytogenes_1639_v112 | 0.9245 |
| Listeria_monocytogenes_serotype_1_2a_str_10-4758_1196168 | Listeria_monocytogenes_1639_v112 | 0.9327 |
| Listeria_monocytogenes_serotype_1_2a_str_10-4754_1196167 | Listeria_monocytogenes_1639_v112 | 0.933  |
| Listeria_monocytogenes_serotype_1_2a_str_10-1321_1196191 | Listeria_monocytogenes_1639_v112 | 0.9245 |
| Listeria_monocytogenes_serotype_1_2a_str_10-1047_1196190 | Listeria_monocytogenes_1639_v112 | 0.9255 |
| Listeria_monocytogenes_serotype_1_2a_str_10-1046_1196189 | Listeria_monocytogenes_1639_v112 | 0.9255 |
| Listeria_monocytogenes_serotype_1_2a_str_10-0934_1196170 | Listeria_monocytogenes_1639_v112 | 0.9383 |
| Listeria_monocytogenes_serotype_1_2a_str_10-0933_1196169 | Listeria_monocytogenes_1639_v112 | 0.9383 |
| Listeria_monocytogenes_serotype_1_2a_str_10-0815_1196188 | Listeria_monocytogenes_1639_v112 | 0.9207 |
| Listeria_monocytogenes_serotype_1_2a_str_10-0814_1196187 | Listeria_monocytogenes_1639_v112 | 0.9248 |
| Listeria_monocytogenes_serotype_1_2a_str_10-0813_1196166 | Listeria_monocytogenes_1639_v112 | 0.9282 |
| Listeria_monocytogenes_serotype_1_2a_str_10-0812_1196165 | Listeria_monocytogenes_1639_v112 | 0.9282 |
| Listeria_monocytogenes_serotype_1_2a_str_08-7669_1196186 | Listeria_monocytogenes_1639_v112 | 0.9331 |
| Listeria_monocytogenes_serotype_1_2a_str_08-7374_1196185 | Listeria_monocytogenes_1639_v112 | 0.9245 |
| Listeria_monocytogenes_serotype_1_2a_str_08-6997_1196184 | Listeria_monocytogenes_1639_v112 | 0.9207 |
| Listeria_monocytogenes_serotype_1_2a_str_08-6569_1196183 | Listeria_monocytogenes_1639_v112 | 0.9207 |
| Listeria_monocytogenes_serotype_1_2a_str_08-6056_1196182 | Listeria_monocytogenes_1639_v112 | 0.9207 |
| Listeria_monocytogenes_serotype_1_2a_str_04-5457_1196181 | Listeria_monocytogenes_1639_v112 | 0.9245 |
| Listeria_monocytogenes_serotype_1_2a_str_02-5993_1196180 | Listeria_monocytogenes_1639_v112 | 0.9245 |
| Listeria_monocytogenes_R479a_1437838                     | Listeria_monocytogenes_1639_v112 | 0.9238 |
| Listeria_monocytogenes_N53-1_1234142                     | Listeria_monocytogenes_1639_v112 | 0.8911 |
| Listeria_monocytogenes_M7_1030009                        | Listeria_monocytogenes_1639_v112 | 0.9101 |
| Listeria_monocytogenes_LO28_393132                       | Listeria_monocytogenes_1639_v112 | 0.927  |
| Listeria_monocytogenes_L99_563174                        | Listeria_monocytogenes_1639_v112 | 0.9104 |
| Listeria_monocytogenes_L312_882094                       | Listeria_monocytogenes_1639_v112 | 0.9675 |
| Listeria_monocytogenes_J1816_930781                      | Listeria_monocytogenes_1639_v112 | 0.9581 |
| Listeria_monocytogenes_J1-220_930782                     | Listeria_monocytogenes_1639_v112 | 0.9527 |
| Listeria_monocytogenes_J0161_393130                      | Listeria_monocytogenes_1639_v112 | 0.933  |
| Listeria_monocytogenes_HCC23_552536                      | Listeria_monocytogenes_1639_v112 | 0.9097 |
| Listeria_monocytogenes_FSL_R2-561_393126                 | Listeria_monocytogenes_1639_v112 | 0.9308 |
| Listeria_monocytogenes_FSL_J1-208_393119                 | Listeria_monocytogenes_1639_v112 | 0.9151 |
| Listeria_monocytogenes_FSL_J1-175_393118                 | Listeria_monocytogenes_1639_v112 | 0.9488 |
| Listeria_monocytogenes_Finland_1998_393127               | Listeria_monocytogenes_1639_v112 | 0.9382 |
| Listeria_monocytogenes_EGD-e_169963_v1                   | Listeria_monocytogenes_1639_v112 | 0.9361 |
| Listeria_monocytogenes_EGD-e_169963                      | Listeria_monocytogenes_1639_v112 | 0.9361 |
| Listeria_monocytogenes_EGD_1334565                       | Listeria_monocytogenes_1639_v112 | 0.9314 |



[illegible]

|                                                          |                                  |        |
|----------------------------------------------------------|----------------------------------|--------|
| Listeria_monocytogenes_1639_v118                         | Listeria_monocytogenes_1639_v112 | 0.9669 |
| Listeria_monocytogenes_1639_v117                         | Listeria_monocytogenes_1639_v112 | 0.9323 |
| Listeria_monocytogenes_1639_v116                         | Listeria_monocytogenes_1639_v112 | 0.9792 |
| Listeria_monocytogenes_1639_v115                         | Listeria_monocytogenes_1639_v112 | 0.9795 |
| Listeria_monocytogenes_1639_v114                         | Listeria_monocytogenes_1639_v112 | 0.9292 |
| Listeria_monocytogenes_1639_v113                         | Listeria_monocytogenes_1639_v112 | 0.9526 |
| Listeria_monocytogenes_1639_v112                         | Listeria_monocytogenes_1639_v112 | 0.0653 |
| Listeria_welshimeri_1643                                 | Listeria_monocytogenes_1639_v113 | 0.8813 |
| Listeria_welshimeri_serovar_6b_str_SLCC5334_386043       | Listeria_monocytogenes_1639_v113 | 0.8806 |
| Listeria_seeligeri_serovar_1_2b_str_SLCC3954_683837      | Listeria_monocytogenes_1639_v113 | 0.8882 |
| Listeria_seeligeri_FSL_S4-171_702452                     | Listeria_monocytogenes_1639_v113 | 0.8243 |
| Listeria_seeligeri_FSL_N1-067_702453                     | Listeria_monocytogenes_1639_v113 | 0.8356 |
| Listeria_seeligeri_1640_v1                               | Listeria_monocytogenes_1639_v113 | 0.8912 |
| Listeria_seeligeri_1640                                  | Listeria_monocytogenes_1639_v113 | 0.8831 |
| Listeria_monocytogenes_WSLC1042_1457188                  | Listeria_monocytogenes_1639_v113 | 0.9532 |
| Listeria_monocytogenes_WSLC1001_1457187                  | Listeria_monocytogenes_1639_v113 | 0.9518 |
| Listeria_monocytogenes_SLCC7179_879090                   | Listeria_monocytogenes_1639_v113 | 0.9445 |
| Listeria_monocytogenes_SLCC5850_882096                   | Listeria_monocytogenes_1639_v113 | 0.9543 |
| Listeria_monocytogenes_SLCC2755_932919                   | Listeria_monocytogenes_1639_v113 | 0.9471 |
| Listeria_monocytogenes_SLCC2540_879089                   | Listeria_monocytogenes_1639_v113 | 0.9708 |
| Listeria_monocytogenes_SLCC2479_882020                   | Listeria_monocytogenes_1639_v113 | 0.9488 |
| Listeria_monocytogenes_SLCC2378_879088                   | Listeria_monocytogenes_1639_v113 | 0.9546 |
| Listeria_monocytogenes_SLCC2376_882097                   | Listeria_monocytogenes_1639_v113 | 0.943  |
| Listeria_monocytogenes_SLCC2372_932920                   | Listeria_monocytogenes_1639_v113 | 0.9414 |
| Listeria_monocytogenes_serotype_4b_str_LL195_1230340     | Listeria_monocytogenes_1639_v113 | 0.9609 |
| Listeria_monocytogenes_serotype_4b_str_LIS0087_1134669   | Listeria_monocytogenes_1639_v113 | 0.932  |
| Listeria_monocytogenes_serotype_4b_str_F2365_265669      | Listeria_monocytogenes_1639_v113 | 0.9609 |
| Listeria_monocytogenes_serotype_4b_str_CLIP_80459_568819 | Listeria_monocytogenes_1639_v113 | 0.9627 |
| Listeria_monocytogenes_serotype_4b_str_81-0861_1196161   | Listeria_monocytogenes_1639_v113 | 0.9442 |
| Listeria_monocytogenes_serotype_4b_str_81-0592_1196160   | Listeria_monocytogenes_1639_v113 | 0.9453 |
| Listeria_monocytogenes_serotype_4b_str_81-0558_1196159   | Listeria_monocytogenes_1639_v113 | 0.9464 |
| Listeria_monocytogenes_serotype_4b_str_10-0809_1196162   | Listeria_monocytogenes_1639_v113 | 0.9457 |
| Listeria_monocytogenes_serotype_4b_str_02-6680_1196175   | Listeria_monocytogenes_1639_v113 | 0.9578 |
| Listeria_monocytogenes_serotype_4b_str_02-6679_1196174   | Listeria_monocytogenes_1639_v113 | 0.9578 |
| Listeria_monocytogenes_serotype_4b_str_02-1792_1196173   | Listeria_monocytogenes_1639_v113 | 0.9468 |
| Listeria_monocytogenes_serotype_4b_str_02-1289_1196172   | Listeria_monocytogenes_1639_v113 | 0.9468 |
| Listeria_monocytogenes_serotype_4b_str_02-1103_1196171   | Listeria_monocytogenes_1639_v113 | 0.9468 |
| Listeria_monocytogenes_serotype_3c_str_10-5027_1196195   | Listeria_monocytogenes_1639_v113 | 0.9488 |
| Listeria_monocytogenes_serotype_1_2c_str_10-5026_1196194 | Listeria_monocytogenes_1639_v113 | 0.9499 |
| Listeria_monocytogenes_serotype_1_2c_str_10-5025_1196193 | Listeria_monocytogenes_1639_v113 | 0.9499 |
| Listeria_monocytogenes_serotype_1_2b_str_10-0811_1196164 | Listeria_monocytogenes_1639_v113 | 0.9771 |
| Listeria_monocytogenes_serotype_1_2b_str_10-0810_1196163 | Listeria_monocytogenes_1639_v113 | 0.9771 |
| Listeria_monocytogenes_serotype_1_2a_str_99-6370_1196179 | Listeria_monocytogenes_1639_v113 | 0.9357 |
| Listeria_monocytogenes_serotype_1_2a_str_98-2035_1196178 | Listeria_monocytogenes_1639_v113 | 0.9357 |
| Listeria_monocytogenes_serotype_1_2a_str_95-0093_1196177 | Listeria_monocytogenes_1639_v113 | 0.9409 |
| Listeria_monocytogenes_serotype_1_2a_str_88-0478_1196176 | Listeria_monocytogenes_1639_v113 | 0.939  |
| Listeria_monocytogenes_serotype_1_2a_str_10-5024_1196192 | Listeria_monocytogenes_1639_v113 | 0.9413 |
| Listeria_monocytogenes_serotype_1_2a_str_10-4758_1196168 | Listeria_monocytogenes_1639_v113 | 0.9593 |
| Listeria_monocytogenes_serotype_1_2a_str_10-4754_1196167 | Listeria_monocytogenes_1639_v113 | 0.9593 |
| Listeria_monocytogenes_serotype_1_2a_str_10-1321_1196191 | Listeria_monocytogenes_1639_v113 | 0.9413 |
| Listeria_monocytogenes_serotype_1_2a_str_10-1047_1196190 | Listeria_monocytogenes_1639_v113 | 0.9416 |
| Listeria_monocytogenes_serotype_1_2a_str_10-1046_1196189 | Listeria_monocytogenes_1639_v113 | 0.9416 |
| Listeria_monocytogenes_serotype_1_2a_str_10-0934_1196170 | Listeria_monocytogenes_1639_v113 | 0.9518 |
| Listeria_monocytogenes_serotype_1_2a_str_10-0933_1196169 | Listeria_monocytogenes_1639_v113 | 0.9518 |
| Listeria_monocytogenes_serotype_1_2a_str_10-0815_1196188 | Listeria_monocytogenes_1639_v113 | 0.9367 |
| Listeria_monocytogenes_serotype_1_2a_str_10-0814_1196187 | Listeria_monocytogenes_1639_v113 | 0.9413 |
| Listeria_monocytogenes_serotype_1_2a_str_10-0813_1196166 | Listeria_monocytogenes_1639_v113 | 0.9501 |
| Listeria_monocytogenes_serotype_1_2a_str_10-0812_1196165 | Listeria_monocytogenes_1639_v113 | 0.9501 |
| Listeria_monocytogenes_serotype_1_2a_str_08-7669_1196186 | Listeria_monocytogenes_1639_v113 | 0.9369 |
| Listeria_monocytogenes_serotype_1_2a_str_08-7374_1196185 | Listeria_monocytogenes_1639_v113 | 0.9413 |
| Listeria_monocytogenes_serotype_1_2a_str_08-6997_1196184 | Listeria_monocytogenes_1639_v113 | 0.9367 |
| Listeria_monocytogenes_serotype_1_2a_str_08-6569_1196183 | Listeria_monocytogenes_1639_v113 | 0.9367 |
| Listeria_monocytogenes_serotype_1_2a_str_08-6056_1196182 | Listeria_monocytogenes_1639_v113 | 0.9367 |
| Listeria_monocytogenes_serotype_1_2a_str_04-5457_1196181 | Listeria_monocytogenes_1639_v113 | 0.9413 |
| Listeria_monocytogenes_serotype_1_2a_str_02-5993_1196180 | Listeria_monocytogenes_1639_v113 | 0.9409 |
| Listeria_monocytogenes_R479a_1437838                     | Listeria_monocytogenes_1639_v113 | 0.9395 |
| Listeria_monocytogenes_N53-1_1234142                     | Listeria_monocytogenes_1639_v113 | 0.899  |
| Listeria_monocytogenes_M7_1030009                        | Listeria_monocytogenes_1639_v113 | 0.9164 |
| Listeria_monocytogenes_LO28_393132                       | Listeria_monocytogenes_1639_v113 | 0.9474 |
| Listeria_monocytogenes_L99_563174                        | Listeria_monocytogenes_1639_v113 | 0.917  |
| Listeria_monocytogenes_L312_882094                       | Listeria_monocytogenes_1639_v113 | 0.9631 |
| Listeria_monocytogenes_J1816_930781                      | Listeria_monocytogenes_1639_v113 | 0.9429 |
| Listeria_monocytogenes_J1-220_930782                     | Listeria_monocytogenes_1639_v113 | 0.945  |
| Listeria_monocytogenes_J0161_393130                      | Listeria_monocytogenes_1639_v113 | 0.9368 |
| Listeria_monocytogenes_HCC23_552536                      | Listeria_monocytogenes_1639_v113 | 0.9163 |
| Listeria_monocytogenes_FSL_R2-561_393126                 | Listeria_monocytogenes_1639_v113 | 0.9481 |
| Listeria_monocytogenes_FSL_J1-208_393119                 | Listeria_monocytogenes_1639_v113 | 0.9112 |
| Listeria_monocytogenes_FSL_J1-175_393118                 | Listeria_monocytogenes_1639_v113 | 0.9714 |
| Listeria_monocytogenes_Finland_1998_393127               | Listeria_monocytogenes_1639_v113 | 0.9522 |
| Listeria_monocytogenes_EGD-e_169963_v1                   | Listeria_monocytogenes_1639_v113 | 0.9464 |
| Listeria_monocytogenes_EGD-e_169963                      | Listeria_monocytogenes_1639_v113 | 0.9468 |
| Listeria_monocytogenes_EGD_1334565                       | Listeria_monocytogenes_1639_v113 | 0.955  |
| Listeria_monocytogenes_CFSAN002349_1299895               | Listeria_monocytogenes_1639_v113 | 0.9625 |
| Listeria_monocytogenes_ATCC_19117_882095_v1              | Listeria_monocytogenes_1639_v113 | 0.9557 |
| Listeria_monocytogenes_ATCC_19117_882095                 | Listeria_monocytogenes_1639_v113 | 0.9556 |
| Listeria_monocytogenes_6179_1288295                      | Listeria_monocytogenes_1639_v113 | 0.9318 |
| Listeria_monocytogenes_1639_v9                           | Listeria_monocytogenes_1639_v113 | 0.9445 |
| Listeria_monocytogenes_1639_v99                          | Listeria_monocytogenes_1639_v113 | 0.9444 |
| Listeria_monocytogenes_1639_v98                          | Listeria_monocytogenes_1639_v113 | 0.9349 |
| Listeria_monocytogenes_1639_v97                          | Listeria_monocytogenes_1639_v113 | 0.9489 |
| Listeria_monocytogenes_1639_v96                          | Listeria_monocytogenes_1639_v113 | 0.9429 |





[illegible]

|                                                          |                                  |        |
|----------------------------------------------------------|----------------------------------|--------|
| Listeria_seeligeri_FSL_S4-171_702452                     | Listeria_monocytogenes_1639_v114 | 0.8195 |
| Listeria_seeligeri_FSL_N1-067_702453                     | Listeria_monocytogenes_1639_v114 | 0.8347 |
| Listeria_seeligeri_1640_v1                               | Listeria_monocytogenes_1639_v114 | 0.8752 |
| Listeria_seeligeri_1640                                  | Listeria_monocytogenes_1639_v114 | 0.8716 |
| Listeria_monocytogenes_WSLC1042_1457188                  | Listeria_monocytogenes_1639_v114 | 0.9226 |
| Listeria_monocytogenes_WSLC1001_1457187                  | Listeria_monocytogenes_1639_v114 | 0.9823 |
| Listeria_monocytogenes_SLCC7179_879090                   | Listeria_monocytogenes_1639_v114 | 0.9575 |
| Listeria_monocytogenes_SLCC5850_882096                   | Listeria_monocytogenes_1639_v114 | 0.9785 |
| Listeria_monocytogenes_SLCC2755_932919                   | Listeria_monocytogenes_1639_v114 | 0.9273 |
| Listeria_monocytogenes_SLCC2540_879089                   | Listeria_monocytogenes_1639_v114 | 0.939  |
| Listeria_monocytogenes_SLCC2479_882020                   | Listeria_monocytogenes_1639_v114 | 0.9626 |
| Listeria_monocytogenes_SLCC2378_879088                   | Listeria_monocytogenes_1639_v114 | 0.924  |
| Listeria_monocytogenes_SLCC2376_882097                   | Listeria_monocytogenes_1639_v114 | 0.9361 |
| Listeria_monocytogenes_SLCC2372_932920                   | Listeria_monocytogenes_1639_v114 | 0.9548 |
| Listeria_monocytogenes_serotype_4b_str_LL195_1230340     | Listeria_monocytogenes_1639_v114 | 0.9296 |
| Listeria_monocytogenes_serotype_4b_str_LIS0087_1134669   | Listeria_monocytogenes_1639_v114 | 0.9638 |
| Listeria_monocytogenes_serotype_4b_str_F2365_265669      | Listeria_monocytogenes_1639_v114 | 0.9296 |
| Listeria_monocytogenes_serotype_4b_str_CLIP_80459_568819 | Listeria_monocytogenes_1639_v114 | 0.9364 |
| Listeria_monocytogenes_serotype_4b_str_81-0861_1196161   | Listeria_monocytogenes_1639_v114 | 0.9188 |
| Listeria_monocytogenes_serotype_4b_str_81-0592_1196160   | Listeria_monocytogenes_1639_v114 | 0.9199 |
| Listeria_monocytogenes_serotype_4b_str_81-0558_1196159   | Listeria_monocytogenes_1639_v114 | 0.9206 |
| Listeria_monocytogenes_serotype_4b_str_10-0809_1196162   | Listeria_monocytogenes_1639_v114 | 0.9199 |
| Listeria_monocytogenes_serotype_4b_str_02-6680_1196175   | Listeria_monocytogenes_1639_v114 | 0.9346 |
| Listeria_monocytogenes_serotype_4b_str_02-6679_1196174   | Listeria_monocytogenes_1639_v114 | 0.9346 |
| Listeria_monocytogenes_serotype_4b_str_02-1792_1196173   | Listeria_monocytogenes_1639_v114 | 0.921  |
| Listeria_monocytogenes_serotype_4b_str_02-1289_1196172   | Listeria_monocytogenes_1639_v114 | 0.921  |
| Listeria_monocytogenes_serotype_4b_str_02-1103_1196171   | Listeria_monocytogenes_1639_v114 | 0.921  |
| Listeria_monocytogenes_serotype_3c_str_10-5027_1196195   | Listeria_monocytogenes_1639_v114 | 0.9593 |
| Listeria_monocytogenes_serotype_1_2c_str_10-5026_1196194 | Listeria_monocytogenes_1639_v114 | 0.9608 |
| Listeria_monocytogenes_serotype_1_2c_str_10-5025_1196193 | Listeria_monocytogenes_1639_v114 | 0.9608 |
| Listeria_monocytogenes_serotype_1_2b_str_10-0811_1196164 | Listeria_monocytogenes_1639_v114 | 0.9375 |
| Listeria_monocytogenes_serotype_1_2b_str_10-0810_1196163 | Listeria_monocytogenes_1639_v114 | 0.9375 |
| Listeria_monocytogenes_serotype_1_2a_str_99-6370_1196179 | Listeria_monocytogenes_1639_v114 | 0.9491 |
| Listeria_monocytogenes_serotype_1_2a_str_98-2035_1196178 | Listeria_monocytogenes_1639_v114 | 0.9491 |
| Listeria_monocytogenes_serotype_1_2a_str_95-0093_1196177 | Listeria_monocytogenes_1639_v114 | 0.9551 |
| Listeria_monocytogenes_serotype_1_2a_str_88-0478_1196176 | Listeria_monocytogenes_1639_v114 | 0.9573 |
| Listeria_monocytogenes_serotype_1_2a_str_10-5024_1196192 | Listeria_monocytogenes_1639_v114 | 0.9555 |
| Listeria_monocytogenes_serotype_1_2a_str_10-4758_1196168 | Listeria_monocytogenes_1639_v114 | 0.9589 |
| Listeria_monocytogenes_serotype_1_2a_str_10-4754_1196167 | Listeria_monocytogenes_1639_v114 | 0.9589 |
| Listeria_monocytogenes_serotype_1_2a_str_10-1321_1196191 | Listeria_monocytogenes_1639_v114 | 0.9555 |
| Listeria_monocytogenes_serotype_1_2a_str_10-1047_1196190 | Listeria_monocytogenes_1639_v114 | 0.9551 |
| Listeria_monocytogenes_serotype_1_2a_str_10-1046_1196189 | Listeria_monocytogenes_1639_v114 | 0.9551 |
| Listeria_monocytogenes_serotype_1_2a_str_10-0934_1196170 | Listeria_monocytogenes_1639_v114 | 0.9667 |
| Listeria_monocytogenes_serotype_1_2a_str_10-0933_1196169 | Listeria_monocytogenes_1639_v114 | 0.9667 |
| Listeria_monocytogenes_serotype_1_2a_str_10-0815_1196188 | Listeria_monocytogenes_1639_v114 | 0.9505 |
| Listeria_monocytogenes_serotype_1_2a_str_10-0814_1196187 | Listeria_monocytogenes_1639_v114 | 0.9551 |
| Listeria_monocytogenes_serotype_1_2a_str_10-0813_1196166 | Listeria_monocytogenes_1639_v114 | 0.9775 |
| Listeria_monocytogenes_serotype_1_2a_str_10-0812_1196165 | Listeria_monocytogenes_1639_v114 | 0.9775 |
| Listeria_monocytogenes_serotype_1_2a_str_08-7669_1196186 | Listeria_monocytogenes_1639_v114 | 0.9528 |
| Listeria_monocytogenes_serotype_1_2a_str_08-7374_1196185 | Listeria_monocytogenes_1639_v114 | 0.9555 |
| Listeria_monocytogenes_serotype_1_2a_str_08-6997_1196184 | Listeria_monocytogenes_1639_v114 | 0.9505 |
| Listeria_monocytogenes_serotype_1_2a_str_08-6569_1196183 | Listeria_monocytogenes_1639_v114 | 0.9505 |
| Listeria_monocytogenes_serotype_1_2a_str_08-6056_1196182 | Listeria_monocytogenes_1639_v114 | 0.9505 |
| Listeria_monocytogenes_serotype_1_2a_str_04-5457_1196181 | Listeria_monocytogenes_1639_v114 | 0.9555 |
| Listeria_monocytogenes_serotype_1_2a_str_02-5993_1196180 | Listeria_monocytogenes_1639_v114 | 0.9551 |
| Listeria_monocytogenes_R479a_1437838                     | Listeria_monocytogenes_1639_v114 | 0.9533 |
| Listeria_monocytogenes_N53-1_1234142                     | Listeria_monocytogenes_1639_v114 | 0.9038 |
| Listeria_monocytogenes_M7_1030009                        | Listeria_monocytogenes_1639_v114 | 0.9081 |
| Listeria_monocytogenes_LO28_393132                       | Listeria_monocytogenes_1639_v114 | 0.9593 |
| Listeria_monocytogenes_L99_563174                        | Listeria_monocytogenes_1639_v114 | 0.9088 |
| Listeria_monocytogenes_L312_882094                       | Listeria_monocytogenes_1639_v114 | 0.9364 |
| Listeria_monocytogenes_J1816_930781                      | Listeria_monocytogenes_1639_v114 | 0.928  |
| Listeria_monocytogenes_J1-220_930782                     | Listeria_monocytogenes_1639_v114 | 0.9228 |
| Listeria_monocytogenes_J0161_393130                      | Listeria_monocytogenes_1639_v114 | 0.9515 |
| Listeria_monocytogenes_HCC23_552536                      | Listeria_monocytogenes_1639_v114 | 0.9081 |
| Listeria_monocytogenes_FSL_R2-561_393126                 | Listeria_monocytogenes_1639_v114 | 0.9556 |
| Listeria_monocytogenes_FSL_J1-208_393119                 | Listeria_monocytogenes_1639_v114 | 0.9017 |
| Listeria_monocytogenes_FSL_J1-175_393118                 | Listeria_monocytogenes_1639_v114 | 0.9441 |
| Listeria_monocytogenes_Finland_1998_393127               | Listeria_monocytogenes_1639_v114 | 0.9545 |
| Listeria_monocytogenes_EGD-e_169963_v1                   | Listeria_monocytogenes_1639_v114 | 0.9514 |
| Listeria_monocytogenes_EGD-e_169963                      | Listeria_monocytogenes_1639_v114 | 0.9514 |
| Listeria_monocytogenes_EGD_1334565                       | Listeria_monocytogenes_1639_v114 | 0.9792 |
| Listeria_monocytogenes_CFSAN002349_1299895               | Listeria_monocytogenes_1639_v114 | 0.9347 |
| Listeria_monocytogenes_ATCC_19117_882095_v1              | Listeria_monocytogenes_1639_v114 | 0.9306 |
| Listeria_monocytogenes_ATCC_19117_882095                 | Listeria_monocytogenes_1639_v114 | 0.9306 |
| Listeria_monocytogenes_6179_1288295                      | Listeria_monocytogenes_1639_v114 | 0.9474 |
| Listeria_monocytogenes_1639_v9                           | Listeria_monocytogenes_1639_v114 | 0.9288 |
| Listeria_monocytogenes_1639_v99                          | Listeria_monocytogenes_1639_v114 | 0.9281 |
| Listeria_monocytogenes_1639_v98                          | Listeria_monocytogenes_1639_v114 | 0.9522 |
| Listeria_monocytogenes_1639_v97                          | Listeria_monocytogenes_1639_v114 | 0.9331 |
| Listeria_monocytogenes_1639_v96                          | Listeria_monocytogenes_1639_v114 | 0.9277 |
| Listeria_monocytogenes_1639_v95                          | Listeria_monocytogenes_1639_v114 | 0.9278 |
| Listeria_monocytogenes_1639_v94                          | Listeria_monocytogenes_1639_v114 | 0.9281 |
| Listeria_monocytogenes_1639_v93                          | Listeria_monocytogenes_1639_v114 | 0.9439 |
| Listeria_monocytogenes_1639_v92                          | Listeria_monocytogenes_1639_v114 | 0.9285 |
| Listeria_monocytogenes_1639_v91                          | Listeria_monocytogenes_1639_v114 | 0.925  |
| Listeria_monocytogenes_1639_v90                          | Listeria_monocytogenes_1639_v114 | 0.9522 |
| Listeria_monocytogenes_1639_v8                           | Listeria_monocytogenes_1639_v114 | 0.9446 |
| Listeria_monocytogenes_1639_v89                          | Listeria_monocytogenes_1639_v114 | 0.9317 |
| Listeria_monocytogenes_1639_v88                          | Listeria_monocytogenes_1639_v114 | 0.9708 |
| Listeria_monocytogenes_1639_v87                          | Listeria_monocytogenes_1639_v114 | 0.975  |

[illegible]

[illegible]

|                                                          |                                  |        |
|----------------------------------------------------------|----------------------------------|--------|
| Listeria_monocytogenes_SLCC2378_879088                   | Listeria_monocytogenes_1639_v115 | 0.9989 |
| Listeria_monocytogenes_SLCC2376_882097                   | Listeria_monocytogenes_1639_v115 | 0.9403 |
| Listeria_monocytogenes_SLCC2372_932920                   | Listeria_monocytogenes_1639_v115 | 0.9194 |
| Listeria_monocytogenes_serotype_4b_str_LL195_1230340     | Listeria_monocytogenes_1639_v115 | 0.9923 |
| Listeria_monocytogenes_serotype_4b_str_LIS0087_1134669   | Listeria_monocytogenes_1639_v115 | 0.9059 |
| Listeria_monocytogenes_serotype_4b_str_F2365_265669      | Listeria_monocytogenes_1639_v115 | 0.9923 |
| Listeria_monocytogenes_serotype_4b_str_CLIP_80459_568819 | Listeria_monocytogenes_1639_v115 | 0.9724 |
| Listeria_monocytogenes_serotype_4b_str_81-0861_1196161   | Listeria_monocytogenes_1639_v115 | 0.9861 |
| Listeria_monocytogenes_serotype_4b_str_81-0592_1196160   | Listeria_monocytogenes_1639_v115 | 0.9872 |
| Listeria_monocytogenes_serotype_4b_str_81-0558_1196159   | Listeria_monocytogenes_1639_v115 | 0.9864 |
| Listeria_monocytogenes_serotype_4b_str_10-0809_1196162   | Listeria_monocytogenes_1639_v115 | 0.9876 |
| Listeria_monocytogenes_serotype_4b_str_02-6680_1196175   | Listeria_monocytogenes_1639_v115 | 0.9728 |
| Listeria_monocytogenes_serotype_4b_str_02-6679_1196174   | Listeria_monocytogenes_1639_v115 | 0.9728 |
| Listeria_monocytogenes_serotype_4b_str_02-1792_1196173   | Listeria_monocytogenes_1639_v115 | 0.9861 |
| Listeria_monocytogenes_serotype_4b_str_02-1289_1196172   | Listeria_monocytogenes_1639_v115 | 0.9861 |
| Listeria_monocytogenes_serotype_4b_str_02-1103_1196171   | Listeria_monocytogenes_1639_v115 | 0.9861 |
| Listeria_monocytogenes_serotype_3c_str_10-5027_1196195   | Listeria_monocytogenes_1639_v115 | 0.9259 |
| Listeria_monocytogenes_serotype_1_2c_str_10-5026_1196194 | Listeria_monocytogenes_1639_v115 | 0.9266 |
| Listeria_monocytogenes_serotype_1_2c_str_10-5025_1196193 | Listeria_monocytogenes_1639_v115 | 0.9266 |
| Listeria_monocytogenes_serotype_1_2b_str_10-0811_1196164 | Listeria_monocytogenes_1639_v115 | 0.9382 |
| Listeria_monocytogenes_serotype_1_2b_str_10-0810_1196163 | Listeria_monocytogenes_1639_v115 | 0.9382 |
| Listeria_monocytogenes_serotype_1_2a_str_99-6370_1196179 | Listeria_monocytogenes_1639_v115 | 0.912  |
| Listeria_monocytogenes_serotype_1_2a_str_98-2035_1196178 | Listeria_monocytogenes_1639_v115 | 0.912  |
| Listeria_monocytogenes_serotype_1_2a_str_95-0093_1196177 | Listeria_monocytogenes_1639_v115 | 0.9174 |
| Listeria_monocytogenes_serotype_1_2a_str_88-0478_1196176 | Listeria_monocytogenes_1639_v115 | 0.9163 |
| Listeria_monocytogenes_serotype_1_2a_str_10-5024_1196192 | Listeria_monocytogenes_1639_v115 | 0.9174 |
| Listeria_monocytogenes_serotype_1_2a_str_10-4758_1196168 | Listeria_monocytogenes_1639_v115 | 0.9354 |
| Listeria_monocytogenes_serotype_1_2a_str_10-4754_1196167 | Listeria_monocytogenes_1639_v115 | 0.9358 |
| Listeria_monocytogenes_serotype_1_2a_str_10-1321_1196191 | Listeria_monocytogenes_1639_v115 | 0.9174 |
| Listeria_monocytogenes_serotype_1_2a_str_10-1047_1196190 | Listeria_monocytogenes_1639_v115 | 0.9181 |
| Listeria_monocytogenes_serotype_1_2a_str_10-1046_1196189 | Listeria_monocytogenes_1639_v115 | 0.9181 |
| Listeria_monocytogenes_serotype_1_2a_str_10-0934_1196170 | Listeria_monocytogenes_1639_v115 | 0.943  |
| Listeria_monocytogenes_serotype_1_2a_str_10-0933_1196169 | Listeria_monocytogenes_1639_v115 | 0.943  |
| Listeria_monocytogenes_serotype_1_2a_str_10-0815_1196188 | Listeria_monocytogenes_1639_v115 | 0.9134 |
| Listeria_monocytogenes_serotype_1_2a_str_10-0814_1196187 | Listeria_monocytogenes_1639_v115 | 0.9178 |
| Listeria_monocytogenes_serotype_1_2a_str_10-0813_1196166 | Listeria_monocytogenes_1639_v115 | 0.923  |
| Listeria_monocytogenes_serotype_1_2a_str_10-0812_1196165 | Listeria_monocytogenes_1639_v115 | 0.923  |
| Listeria_monocytogenes_serotype_1_2a_str_08-7669_1196186 | Listeria_monocytogenes_1639_v115 | 0.9267 |
| Listeria_monocytogenes_serotype_1_2a_str_08-7374_1196185 | Listeria_monocytogenes_1639_v115 | 0.9174 |
| Listeria_monocytogenes_serotype_1_2a_str_08-6997_1196184 | Listeria_monocytogenes_1639_v115 | 0.9134 |
| Listeria_monocytogenes_serotype_1_2a_str_08-6569_1196183 | Listeria_monocytogenes_1639_v115 | 0.9134 |
| Listeria_monocytogenes_serotype_1_2a_str_08-6056_1196182 | Listeria_monocytogenes_1639_v115 | 0.9134 |
| Listeria_monocytogenes_serotype_1_2a_str_04-5457_1196181 | Listeria_monocytogenes_1639_v115 | 0.9174 |
| Listeria_monocytogenes_serotype_1_2a_str_02-5993_1196180 | Listeria_monocytogenes_1639_v115 | 0.9174 |
| Listeria_monocytogenes_R479a_1437838                     | Listeria_monocytogenes_1639_v115 | 0.9167 |
| Listeria_monocytogenes_N53-1_1234142                     | Listeria_monocytogenes_1639_v115 | 0.8921 |
| Listeria_monocytogenes_M7_1030009                        | Listeria_monocytogenes_1639_v115 | 0.9052 |
| Listeria_monocytogenes_LO28_393132                       | Listeria_monocytogenes_1639_v115 | 0.9252 |
| Listeria_monocytogenes_L99_563174                        | Listeria_monocytogenes_1639_v115 | 0.9056 |
| Listeria_monocytogenes_L312_882094                       | Listeria_monocytogenes_1639_v115 | 0.9728 |
| Listeria_monocytogenes_J1816_930781                      | Listeria_monocytogenes_1639_v115 | 0.9493 |
| Listeria_monocytogenes_J1-220_930782                     | Listeria_monocytogenes_1639_v115 | 0.9615 |
| Listeria_monocytogenes_J0161_393130                      | Listeria_monocytogenes_1639_v115 | 0.9234 |
| Listeria_monocytogenes_HCC23_552536                      | Listeria_monocytogenes_1639_v115 | 0.9049 |
| Listeria_monocytogenes_FSL_R2-561_393126                 | Listeria_monocytogenes_1639_v115 | 0.9252 |
| Listeria_monocytogenes_FSL_J1-208_393119                 | Listeria_monocytogenes_1639_v115 | 0.9196 |
| Listeria_monocytogenes_FSL_J1-175_393118                 | Listeria_monocytogenes_1639_v115 | 0.9536 |
| Listeria_monocytogenes_Finland_1998_393127               | Listeria_monocytogenes_1639_v115 | 0.9426 |
| Listeria_monocytogenes_EGD-e_169963_v1                   | Listeria_monocytogenes_1639_v115 | 0.9351 |
| Listeria_monocytogenes_EGD-e_169963                      | Listeria_monocytogenes_1639_v115 | 0.9355 |
| Listeria_monocytogenes_EGD_1334565                       | Listeria_monocytogenes_1639_v115 | 0.9307 |
| Listeria_monocytogenes_CFSAN002349_1299895               | Listeria_monocytogenes_1639_v115 | 0.9728 |
| Listeria_monocytogenes_ATCC_19117_882095_v1              | Listeria_monocytogenes_1639_v115 | 0.982  |
| Listeria_monocytogenes_ATCC_19117_882095                 | Listeria_monocytogenes_1639_v115 | 0.9817 |
| Listeria_monocytogenes_6179_1288295                      | Listeria_monocytogenes_1639_v115 | 0.9085 |
| Listeria_monocytogenes_1639_v9                           | Listeria_monocytogenes_1639_v115 | 0.9243 |
| Listeria_monocytogenes_1639_v99                          | Listeria_monocytogenes_1639_v115 | 0.9501 |
| Listeria_monocytogenes_1639_v98                          | Listeria_monocytogenes_1639_v115 | 0.9199 |
| Listeria_monocytogenes_1639_v97                          | Listeria_monocytogenes_1639_v115 | 0.9644 |
| Listeria_monocytogenes_1639_v96                          | Listeria_monocytogenes_1639_v115 | 0.9494 |
| Listeria_monocytogenes_1639_v95                          | Listeria_monocytogenes_1639_v115 | 0.9494 |
| Listeria_monocytogenes_1639_v94                          | Listeria_monocytogenes_1639_v115 | 0.9497 |
| Listeria_monocytogenes_1639_v93                          | Listeria_monocytogenes_1639_v115 | 0.923  |
| Listeria_monocytogenes_1639_v92                          | Listeria_monocytogenes_1639_v115 | 0.9497 |
| Listeria_monocytogenes_1639_v91                          | Listeria_monocytogenes_1639_v115 | 0.9722 |
| Listeria_monocytogenes_1639_v90                          | Listeria_monocytogenes_1639_v115 | 0.9199 |
| Listeria_monocytogenes_1639_v8                           | Listeria_monocytogenes_1639_v115 | 0.9077 |
| Listeria_monocytogenes_1639_v89                          | Listeria_monocytogenes_1639_v115 | 0.9601 |
| Listeria_monocytogenes_1639_v88                          | Listeria_monocytogenes_1639_v115 | 0.9238 |
| Listeria_monocytogenes_1639_v87                          | Listeria_monocytogenes_1639_v115 | 0.9189 |
| Listeria_monocytogenes_1639_v86                          | Listeria_monocytogenes_1639_v115 | 0.9185 |
| Listeria_monocytogenes_1639_v85                          | Listeria_monocytogenes_1639_v115 | 0.9853 |
| Listeria_monocytogenes_1639_v84                          | Listeria_monocytogenes_1639_v115 | 0.927  |
| Listeria_monocytogenes_1639_v83                          | Listeria_monocytogenes_1639_v115 | 0.9706 |
| Listeria_monocytogenes_1639_v82                          | Listeria_monocytogenes_1639_v115 | 0.9698 |
| Listeria_monocytogenes_1639_v81                          | Listeria_monocytogenes_1639_v115 | 0.923  |
| Listeria_monocytogenes_1639_v80                          | Listeria_monocytogenes_1639_v115 | 0.9444 |
| Listeria_monocytogenes_1639_v7                           | Listeria_monocytogenes_1639_v115 | 0.9077 |
| Listeria_monocytogenes_1639_v79                          | Listeria_monocytogenes_1639_v115 | 0.9213 |
| Listeria_monocytogenes_1639_v78                          | Listeria_monocytogenes_1639_v115 | 0.9224 |
| Listeria_monocytogenes_1639_v77                          | Listeria_monocytogenes_1639_v115 | 0.93   |



[illegible]

|                                                          |                                  |        |
|----------------------------------------------------------|----------------------------------|--------|
| Listeria_monocytogenes_1639_v173                         | Listeria_monocytogenes_1639_v115 | 0.9669 |
| Listeria_monocytogenes_1639_v172                         | Listeria_monocytogenes_1639_v115 | 0.941  |
| Listeria_monocytogenes_1639_v171                         | Listeria_monocytogenes_1639_v115 | 0.9279 |
| Listeria_monocytogenes_1639_v170                         | Listeria_monocytogenes_1639_v115 | 0.9357 |
| Listeria_monocytogenes_1639_v16                          | Listeria_monocytogenes_1639_v115 | 0.9043 |
| Listeria_monocytogenes_1639_v169                         | Listeria_monocytogenes_1639_v115 | 0.9376 |
| Listeria_monocytogenes_1639_v168                         | Listeria_monocytogenes_1639_v115 | 0.9385 |
| Listeria_monocytogenes_1639_v167                         | Listeria_monocytogenes_1639_v115 | 0.9307 |
| Listeria_monocytogenes_1639_v166                         | Listeria_monocytogenes_1639_v115 | 0.9388 |
| Listeria_monocytogenes_1639_v165                         | Listeria_monocytogenes_1639_v115 | 0.9373 |
| Listeria_monocytogenes_1639_v164                         | Listeria_monocytogenes_1639_v115 | 0.9919 |
| Listeria_monocytogenes_1639_v163                         | Listeria_monocytogenes_1639_v115 | 0.9582 |
| Listeria_monocytogenes_1639_v162                         | Listeria_monocytogenes_1639_v115 | 0.9919 |
| Listeria_monocytogenes_1639_v161                         | Listeria_monocytogenes_1639_v115 | 0.9919 |
| Listeria_monocytogenes_1639_v160                         | Listeria_monocytogenes_1639_v115 | 0.9916 |
| Listeria_monocytogenes_1639_v15                          | Listeria_monocytogenes_1639_v115 | 0.9245 |
| Listeria_monocytogenes_1639_v159                         | Listeria_monocytogenes_1639_v115 | 0.9694 |
| Listeria_monocytogenes_1639_v158                         | Listeria_monocytogenes_1639_v115 | 0.9923 |
| Listeria_monocytogenes_1639_v157                         | Listeria_monocytogenes_1639_v115 | 0.9923 |
| Listeria_monocytogenes_1639_v156                         | Listeria_monocytogenes_1639_v115 | 0.9194 |
| Listeria_monocytogenes_1639_v155                         | Listeria_monocytogenes_1639_v115 | 0.9317 |
| Listeria_monocytogenes_1639_v154                         | Listeria_monocytogenes_1639_v115 | 0.9356 |
| Listeria_monocytogenes_1639_v153                         | Listeria_monocytogenes_1639_v115 | 0.9324 |
| Listeria_monocytogenes_1639_v152                         | Listeria_monocytogenes_1639_v115 | 0.9694 |
| Listeria_monocytogenes_1639_v151                         | Listeria_monocytogenes_1639_v115 | 0.9694 |
| Listeria_monocytogenes_1639_v150                         | Listeria_monocytogenes_1639_v115 | 0.9321 |
| Listeria_monocytogenes_1639_v14                          | Listeria_monocytogenes_1639_v115 | 0.931  |
| Listeria_monocytogenes_1639_v149                         | Listeria_monocytogenes_1639_v115 | 0.9311 |
| Listeria_monocytogenes_1639_v148                         | Listeria_monocytogenes_1639_v115 | 0.9683 |
| Listeria_monocytogenes_1639_v147                         | Listeria_monocytogenes_1639_v115 | 0.9548 |
| Listeria_monocytogenes_1639_v146                         | Listeria_monocytogenes_1639_v115 | 0.9466 |
| Listeria_monocytogenes_1639_v145                         | Listeria_monocytogenes_1639_v115 | 0.9432 |
| Listeria_monocytogenes_1639_v144                         | Listeria_monocytogenes_1639_v115 | 0.972  |
| Listeria_monocytogenes_1639_v143                         | Listeria_monocytogenes_1639_v115 | 0.9482 |
| Listeria_monocytogenes_1639_v142                         | Listeria_monocytogenes_1639_v115 | 0.9724 |
| Listeria_monocytogenes_1639_v141                         | Listeria_monocytogenes_1639_v115 | 0.9647 |
| Listeria_monocytogenes_1639_v140                         | Listeria_monocytogenes_1639_v115 | 0.9731 |
| Listeria_monocytogenes_1639_v13                          | Listeria_monocytogenes_1639_v115 | 0.9241 |
| Listeria_monocytogenes_1639_v139                         | Listeria_monocytogenes_1639_v115 | 0.9674 |
| Listeria_monocytogenes_1639_v138                         | Listeria_monocytogenes_1639_v115 | 0.9755 |
| Listeria_monocytogenes_1639_v137                         | Listeria_monocytogenes_1639_v115 | 0.9755 |
| Listeria_monocytogenes_1639_v136                         | Listeria_monocytogenes_1639_v115 | 0.9351 |
| Listeria_monocytogenes_1639_v135                         | Listeria_monocytogenes_1639_v115 | 0.9194 |
| Listeria_monocytogenes_1639_v134                         | Listeria_monocytogenes_1639_v115 | 0.9962 |
| Listeria_monocytogenes_1639_v133                         | Listeria_monocytogenes_1639_v115 | 0.934  |
| Listeria_monocytogenes_1639_v132                         | Listeria_monocytogenes_1639_v115 | 0.9176 |
| Listeria_monocytogenes_1639_v131                         | Listeria_monocytogenes_1639_v115 | 0.9572 |
| Listeria_monocytogenes_1639_v130                         | Listeria_monocytogenes_1639_v115 | 0.9267 |
| Listeria_monocytogenes_1639_v12                          | Listeria_monocytogenes_1639_v115 | 0.9066 |
| Listeria_monocytogenes_1639_v129                         | Listeria_monocytogenes_1639_v115 | 0.9639 |
| Listeria_monocytogenes_1639_v128                         | Listeria_monocytogenes_1639_v115 | 0.9625 |
| Listeria_monocytogenes_1639_v127                         | Listeria_monocytogenes_1639_v115 | 0.9317 |
| Listeria_monocytogenes_1639_v126                         | Listeria_monocytogenes_1639_v115 | 0.9606 |
| Listeria_monocytogenes_1639_v125                         | Listeria_monocytogenes_1639_v115 | 0.9303 |
| Listeria_monocytogenes_1639_v124                         | Listeria_monocytogenes_1639_v115 | 0.9444 |
| Listeria_monocytogenes_1639_v123                         | Listeria_monocytogenes_1639_v115 | 0.9728 |
| Listeria_monocytogenes_1639_v122                         | Listeria_monocytogenes_1639_v115 | 0.9728 |
| Listeria_monocytogenes_1639_v121                         | Listeria_monocytogenes_1639_v115 | 0.9728 |
| Listeria_monocytogenes_1639_v120                         | Listeria_monocytogenes_1639_v115 | 0.9728 |
| Listeria_monocytogenes_1639_v11                          | Listeria_monocytogenes_1639_v115 | 0.9053 |
| Listeria_monocytogenes_1639_v119                         | Listeria_monocytogenes_1639_v115 | 0.9728 |
| Listeria_monocytogenes_1639_v118                         | Listeria_monocytogenes_1639_v115 | 0.9728 |
| Listeria_monocytogenes_1639_v117                         | Listeria_monocytogenes_1639_v115 | 0.9354 |
| Listeria_monocytogenes_1639_v116                         | Listeria_monocytogenes_1639_v115 | 0.9977 |
| Listeria_monocytogenes_1639_v115                         | Listeria_monocytogenes_1639_v115 | 0.0659 |
| Listeria_welshimeri_1643                                 | Listeria_monocytogenes_1639_v116 | 0.8876 |
| Listeria_welshimeri_serovar_6b_str_SLCC5334_386043       | Listeria_monocytogenes_1639_v116 | 0.8873 |
| Listeria_seeligeri_serovar_1_2b_str_SLCC3954_683837      | Listeria_monocytogenes_1639_v116 | 0.8829 |
| Listeria_seeligeri_FSL_S4-171_702452                     | Listeria_monocytogenes_1639_v116 | 0.8242 |
| Listeria_seeligeri_FSL_N1-067_702453                     | Listeria_monocytogenes_1639_v116 | 0.8282 |
| Listeria_seeligeri_1640_v1                               | Listeria_monocytogenes_1639_v116 | 0.894  |
| Listeria_seeligeri_1640                                  | Listeria_monocytogenes_1639_v116 | 0.881  |
| Listeria_monocytogenes_WSLC1042_1457188                  | Listeria_monocytogenes_1639_v116 | 0.9962 |
| Listeria_monocytogenes_WSLC1001_1457187                  | Listeria_monocytogenes_1639_v116 | 0.9258 |
| Listeria_monocytogenes_SLCC7179_879090                   | Listeria_monocytogenes_1639_v116 | 0.9358 |
| Listeria_monocytogenes_SLCC5850_882096                   | Listeria_monocytogenes_1639_v116 | 0.9304 |
| Listeria_monocytogenes_SLCC2755_932919                   | Listeria_monocytogenes_1639_v116 | 0.9457 |
| Listeria_monocytogenes_SLCC2540_879089                   | Listeria_monocytogenes_1639_v116 | 0.9496 |
| Listeria_monocytogenes_SLCC2479_882020                   | Listeria_monocytogenes_1639_v116 | 0.9263 |
| Listeria_monocytogenes_SLCC2378_879088                   | Listeria_monocytogenes_1639_v116 | 0.9985 |
| Listeria_monocytogenes_SLCC2376_882097                   | Listeria_monocytogenes_1639_v116 | 0.9399 |
| Listeria_monocytogenes_SLCC2372_932920                   | Listeria_monocytogenes_1639_v116 | 0.919  |
| Listeria_monocytogenes_serotype_4b_str_LL195_1230340     | Listeria_monocytogenes_1639_v116 | 0.992  |
| Listeria_monocytogenes_serotype_4b_str_LIS0087_1134669   | Listeria_monocytogenes_1639_v116 | 0.9063 |
| Listeria_monocytogenes_serotype_4b_str_F2365_265669      | Listeria_monocytogenes_1639_v116 | 0.992  |
| Listeria_monocytogenes_serotype_4b_str_CLIP_80459_568819 | Listeria_monocytogenes_1639_v116 | 0.972  |
| Listeria_monocytogenes_serotype_4b_str_81-0861_1196161   | Listeria_monocytogenes_1639_v116 | 0.9857 |
| Listeria_monocytogenes_serotype_4b_str_81-0592_1196160   | Listeria_monocytogenes_1639_v116 | 0.9868 |
| Listeria_monocytogenes_serotype_4b_str_81-0558_1196159   | Listeria_monocytogenes_1639_v116 | 0.9861 |
| Listeria_monocytogenes_serotype_4b_str_10-0809_1196162   | Listeria_monocytogenes_1639_v116 | 0.9872 |
| Listeria_monocytogenes_serotype_4b_str_02-6680_1196175   | Listeria_monocytogenes_1639_v116 | 0.9728 |



[illegible]



|                                                          |                                  |        |
|----------------------------------------------------------|----------------------------------|--------|
| Listeria_monocytogenes_serotype_1_2a_str_10-5024_1196192 | Listeria_monocytogenes_1639_v117 | 0.9478 |
| Listeria_monocytogenes_serotype_1_2a_str_10-4758_1196168 | Listeria_monocytogenes_1639_v117 | 0.9697 |
| Listeria_monocytogenes_serotype_1_2a_str_10-4754_1196167 | Listeria_monocytogenes_1639_v117 | 0.9697 |
| Listeria_monocytogenes_serotype_1_2a_str_10-1321_1196191 | Listeria_monocytogenes_1639_v117 | 0.9478 |
| Listeria_monocytogenes_serotype_1_2a_str_10-1047_1196190 | Listeria_monocytogenes_1639_v117 | 0.9482 |
| Listeria_monocytogenes_serotype_1_2a_str_10-1046_1196189 | Listeria_monocytogenes_1639_v117 | 0.9482 |
| Listeria_monocytogenes_serotype_1_2a_str_10-0934_1196170 | Listeria_monocytogenes_1639_v117 | 0.9627 |
| Listeria_monocytogenes_serotype_1_2a_str_10-0933_1196169 | Listeria_monocytogenes_1639_v117 | 0.9627 |
| Listeria_monocytogenes_serotype_1_2a_str_10-0815_1196188 | Listeria_monocytogenes_1639_v117 | 0.9429 |
| Listeria_monocytogenes_serotype_1_2a_str_10-0814_1196187 | Listeria_monocytogenes_1639_v117 | 0.9474 |
| Listeria_monocytogenes_serotype_1_2a_str_10-0813_1196166 | Listeria_monocytogenes_1639_v117 | 0.9589 |
| Listeria_monocytogenes_serotype_1_2a_str_10-0812_1196165 | Listeria_monocytogenes_1639_v117 | 0.9589 |
| Listeria_monocytogenes_serotype_1_2a_str_08-7669_1196186 | Listeria_monocytogenes_1639_v117 | 0.9435 |
| Listeria_monocytogenes_serotype_1_2a_str_08-7374_1196185 | Listeria_monocytogenes_1639_v117 | 0.9478 |
| Listeria_monocytogenes_serotype_1_2a_str_08-6997_1196184 | Listeria_monocytogenes_1639_v117 | 0.9429 |
| Listeria_monocytogenes_serotype_1_2a_str_08-6569_1196183 | Listeria_monocytogenes_1639_v117 | 0.9429 |
| Listeria_monocytogenes_serotype_1_2a_str_08-6056_1196182 | Listeria_monocytogenes_1639_v117 | 0.9429 |
| Listeria_monocytogenes_serotype_1_2a_str_04-5457_1196181 | Listeria_monocytogenes_1639_v117 | 0.9478 |
| Listeria_monocytogenes_serotype_1_2a_str_02-5993_1196180 | Listeria_monocytogenes_1639_v117 | 0.9474 |
| Listeria_monocytogenes_R479a_1437838                     | Listeria_monocytogenes_1639_v117 | 0.9467 |
| Listeria_monocytogenes_N53-1_1234142                     | Listeria_monocytogenes_1639_v117 | 0.9085 |
| Listeria_monocytogenes_M7_1030009                        | Listeria_monocytogenes_1639_v117 | 0.9122 |
| Listeria_monocytogenes_LO28_393132                       | Listeria_monocytogenes_1639_v117 | 0.955  |
| Listeria_monocytogenes_L99_563174                        | Listeria_monocytogenes_1639_v117 | 0.9128 |
| Listeria_monocytogenes_L312_882094                       | Listeria_monocytogenes_1639_v117 | 0.941  |
| Listeria_monocytogenes_J1816_930781                      | Listeria_monocytogenes_1639_v117 | 0.9228 |
| Listeria_monocytogenes_J1-220_930782                     | Listeria_monocytogenes_1639_v117 | 0.9284 |
| Listeria_monocytogenes_J0161_393130                      | Listeria_monocytogenes_1639_v117 | 0.9479 |
| Listeria_monocytogenes_HCC23_552536                      | Listeria_monocytogenes_1639_v117 | 0.9121 |
| Listeria_monocytogenes_FSL_R2-561_393126                 | Listeria_monocytogenes_1639_v117 | 0.9569 |
| Listeria_monocytogenes_FSL_J1-208_393119                 | Listeria_monocytogenes_1639_v117 | 0.9013 |
| Listeria_monocytogenes_FSL_J1-175_393118                 | Listeria_monocytogenes_1639_v117 | 0.9514 |
| Listeria_monocytogenes_Finland_1998_393127               | Listeria_monocytogenes_1639_v117 | 0.9612 |
| Listeria_monocytogenes_EGD-e_169963_v1                   | Listeria_monocytogenes_1639_v117 | 0.9534 |
| Listeria_monocytogenes_EGD-e_169963                      | Listeria_monocytogenes_1639_v117 | 0.9534 |
| Listeria_monocytogenes_EGD_1334565                       | Listeria_monocytogenes_1639_v117 | 0.9643 |
| Listeria_monocytogenes_CFSAN002349_1299895               | Listeria_monocytogenes_1639_v117 | 0.942  |
| Listeria_monocytogenes_ATCC_19117_882095_v1              | Listeria_monocytogenes_1639_v117 | 0.9371 |
| Listeria_monocytogenes_ATCC_19117_882095                 | Listeria_monocytogenes_1639_v117 | 0.9371 |
| Listeria_monocytogenes_6179_1288295                      | Listeria_monocytogenes_1639_v117 | 0.9486 |
| Listeria_monocytogenes_1639_v9                           | Listeria_monocytogenes_1639_v117 | 0.9263 |
| Listeria_monocytogenes_1639_v99                          | Listeria_monocytogenes_1639_v117 | 0.9244 |
| Listeria_monocytogenes_1639_v98                          | Listeria_monocytogenes_1639_v117 | 0.9388 |
| Listeria_monocytogenes_1639_v97                          | Listeria_monocytogenes_1639_v117 | 0.9309 |
| Listeria_monocytogenes_1639_v96                          | Listeria_monocytogenes_1639_v117 | 0.9233 |
| Listeria_monocytogenes_1639_v95                          | Listeria_monocytogenes_1639_v117 | 0.9233 |
| Listeria_monocytogenes_1639_v94                          | Listeria_monocytogenes_1639_v117 | 0.9233 |
| Listeria_monocytogenes_1639_v93                          | Listeria_monocytogenes_1639_v117 | 0.984  |
| Listeria_monocytogenes_1639_v92                          | Listeria_monocytogenes_1639_v117 | 0.924  |
| Listeria_monocytogenes_1639_v91                          | Listeria_monocytogenes_1639_v117 | 0.9325 |
| Listeria_monocytogenes_1639_v90                          | Listeria_monocytogenes_1639_v117 | 0.9388 |
| Listeria_monocytogenes_1639_v8                           | Listeria_monocytogenes_1639_v117 | 0.9352 |
| Listeria_monocytogenes_1639_v89                          | Listeria_monocytogenes_1639_v117 | 0.9382 |
| Listeria_monocytogenes_1639_v88                          | Listeria_monocytogenes_1639_v117 | 0.9549 |
| Listeria_monocytogenes_1639_v87                          | Listeria_monocytogenes_1639_v117 | 0.9543 |
| Listeria_monocytogenes_1639_v86                          | Listeria_monocytogenes_1639_v117 | 0.9539 |
| Listeria_monocytogenes_1639_v85                          | Listeria_monocytogenes_1639_v117 | 0.9265 |
| Listeria_monocytogenes_1639_v84                          | Listeria_monocytogenes_1639_v117 | 0.9547 |
| Listeria_monocytogenes_1639_v83                          | Listeria_monocytogenes_1639_v117 | 0.9277 |
| Listeria_monocytogenes_1639_v82                          | Listeria_monocytogenes_1639_v117 | 0.9274 |
| Listeria_monocytogenes_1639_v81                          | Listeria_monocytogenes_1639_v117 | 0.9582 |
| Listeria_monocytogenes_1639_v80                          | Listeria_monocytogenes_1639_v117 | 0.9483 |
| Listeria_monocytogenes_1639_v7                           | Listeria_monocytogenes_1639_v117 | 0.9352 |
| Listeria_monocytogenes_1639_v79                          | Listeria_monocytogenes_1639_v117 | 0.9557 |
| Listeria_monocytogenes_1639_v78                          | Listeria_monocytogenes_1639_v117 | 0.959  |
| Listeria_monocytogenes_1639_v77                          | Listeria_monocytogenes_1639_v117 | 0.9498 |
| Listeria_monocytogenes_1639_v76                          | Listeria_monocytogenes_1639_v117 | 0.953  |
| Listeria_monocytogenes_1639_v75                          | Listeria_monocytogenes_1639_v117 | 0.9128 |
| Listeria_monocytogenes_1639_v74                          | Listeria_monocytogenes_1639_v117 | 0.9393 |
| Listeria_monocytogenes_1639_v73                          | Listeria_monocytogenes_1639_v117 | 0.9515 |
| Listeria_monocytogenes_1639_v72                          | Listeria_monocytogenes_1639_v117 | 0.9269 |
| Listeria_monocytogenes_1639_v71                          | Listeria_monocytogenes_1639_v117 | 0.9479 |
| Listeria_monocytogenes_1639_v70                          | Listeria_monocytogenes_1639_v117 | 0.9544 |
| Listeria_monocytogenes_1639_v6                           | Listeria_monocytogenes_1639_v117 | 0.9345 |
| Listeria_monocytogenes_1639_v69                          | Listeria_monocytogenes_1639_v117 | 0.9282 |
| Listeria_monocytogenes_1639_v68                          | Listeria_monocytogenes_1639_v117 | 0.9503 |
| Listeria_monocytogenes_1639_v67                          | Listeria_monocytogenes_1639_v117 | 0.9428 |
| Listeria_monocytogenes_1639_v66                          | Listeria_monocytogenes_1639_v117 | 0.9667 |
| Listeria_monocytogenes_1639_v65                          | Listeria_monocytogenes_1639_v117 | 0.9495 |
| Listeria_monocytogenes_1639_v64                          | Listeria_monocytogenes_1639_v117 | 0.9575 |
| Listeria_monocytogenes_1639_v63                          | Listeria_monocytogenes_1639_v117 | 0.9435 |
| Listeria_monocytogenes_1639_v62                          | Listeria_monocytogenes_1639_v117 | 0.9543 |
| Listeria_monocytogenes_1639_v61                          | Listeria_monocytogenes_1639_v117 | 0.9506 |
| Listeria_monocytogenes_1639_v60                          | Listeria_monocytogenes_1639_v117 | 0.9503 |
| Listeria_monocytogenes_1639_v5                           | Listeria_monocytogenes_1639_v117 | 0.8982 |
| Listeria_monocytogenes_1639_v59                          | Listeria_monocytogenes_1639_v117 | 0.9367 |
| Listeria_monocytogenes_1639_v58                          | Listeria_monocytogenes_1639_v117 | 0.9292 |
| Listeria_monocytogenes_1639_v57                          | Listeria_monocytogenes_1639_v117 | 0.921  |
| Listeria_monocytogenes_1639_v56                          | Listeria_monocytogenes_1639_v117 | 0.9288 |
| Listeria_monocytogenes_1639_v55                          | Listeria_monocytogenes_1639_v117 | 0.9165 |
| Listeria_monocytogenes_1639_v54                          | Listeria_monocytogenes_1639_v117 | 0.9177 |



[illegible]



|                                                          |                                  |        |
|----------------------------------------------------------|----------------------------------|--------|
| Listeria_monocytogenes_serotype_1_2a_str_08-6997_1196184 | Listeria_monocytogenes_1639_v118 | 0.9219 |
| Listeria_monocytogenes_serotype_1_2a_str_08-6569_1196183 | Listeria_monocytogenes_1639_v118 | 0.9219 |
| Listeria_monocytogenes_serotype_1_2a_str_08-6056_1196182 | Listeria_monocytogenes_1639_v118 | 0.9219 |
| Listeria_monocytogenes_serotype_1_2a_str_04-5457_1196181 | Listeria_monocytogenes_1639_v118 | 0.9264 |
| Listeria_monocytogenes_serotype_1_2a_str_02-5993_1196180 | Listeria_monocytogenes_1639_v118 | 0.9261 |
| Listeria_monocytogenes_R479a_1437838                     | Listeria_monocytogenes_1639_v118 | 0.9257 |
| Listeria_monocytogenes_N53-1_1234142                     | Listeria_monocytogenes_1639_v118 | 0.8972 |
| Listeria_monocytogenes_M7_1030009                        | Listeria_monocytogenes_1639_v118 | 0.9093 |
| Listeria_monocytogenes_LO28_393132                       | Listeria_monocytogenes_1639_v118 | 0.9325 |
| Listeria_monocytogenes_L99_563174                        | Listeria_monocytogenes_1639_v118 | 0.91   |
| Listeria_monocytogenes_L312_882094                       | Listeria_monocytogenes_1639_v118 | 0.9811 |
| Listeria_monocytogenes_J1816_930781                      | Listeria_monocytogenes_1639_v118 | 0.9619 |
| Listeria_monocytogenes_J1-220_930782                     | Listeria_monocytogenes_1639_v118 | 0.9523 |
| Listeria_monocytogenes_J0161_393130                      | Listeria_monocytogenes_1639_v118 | 0.9317 |
| Listeria_monocytogenes_HCC23_552536                      | Listeria_monocytogenes_1639_v118 | 0.9093 |
| Listeria_monocytogenes_FSL_R2-561_393126                 | Listeria_monocytogenes_1639_v118 | 0.9324 |
| Listeria_monocytogenes_FSL_J1-208_393119                 | Listeria_monocytogenes_1639_v118 | 0.9212 |
| Listeria_monocytogenes_FSL_J1-175_393118                 | Listeria_monocytogenes_1639_v118 | 0.9614 |
| Listeria_monocytogenes_Finland_1998_393127               | Listeria_monocytogenes_1639_v118 | 0.9536 |
| Listeria_monocytogenes_EGD-e_169963_v1                   | Listeria_monocytogenes_1639_v118 | 0.9421 |
| Listeria_monocytogenes_EGD-e_169963                      | Listeria_monocytogenes_1639_v118 | 0.9424 |
| Listeria_monocytogenes_EGD_1334565                       | Listeria_monocytogenes_1639_v118 | 0.9419 |
| Listeria_monocytogenes_CFSAN002349_1299895               | Listeria_monocytogenes_1639_v118 | 0.9996 |
| Listeria_monocytogenes_ATCC_19117_882095_v1              | Listeria_monocytogenes_1639_v118 | 0.9728 |
| Listeria_monocytogenes_ATCC_19117_882095                 | Listeria_monocytogenes_1639_v118 | 0.9727 |
| Listeria_monocytogenes_6179_1288295                      | Listeria_monocytogenes_1639_v118 | 0.9155 |
| Listeria_monocytogenes_1639_v9                           | Listeria_monocytogenes_1639_v118 | 0.9317 |
| Listeria_monocytogenes_1639_v99                          | Listeria_monocytogenes_1639_v118 | 0.9634 |
| Listeria_monocytogenes_1639_v98                          | Listeria_monocytogenes_1639_v118 | 0.9289 |
| Listeria_monocytogenes_1639_v97                          | Listeria_monocytogenes_1639_v118 | 0.9688 |
| Listeria_monocytogenes_1639_v96                          | Listeria_monocytogenes_1639_v118 | 0.9627 |
| Listeria_monocytogenes_1639_v95                          | Listeria_monocytogenes_1639_v118 | 0.9627 |
| Listeria_monocytogenes_1639_v94                          | Listeria_monocytogenes_1639_v118 | 0.9627 |
| Listeria_monocytogenes_1639_v93                          | Listeria_monocytogenes_1639_v118 | 0.9294 |
| Listeria_monocytogenes_1639_v92                          | Listeria_monocytogenes_1639_v118 | 0.9631 |
| Listeria_monocytogenes_1639_v91                          | Listeria_monocytogenes_1639_v118 | 0.9585 |
| Listeria_monocytogenes_1639_v90                          | Listeria_monocytogenes_1639_v118 | 0.9289 |
| Listeria_monocytogenes_1639_v8                           | Listeria_monocytogenes_1639_v118 | 0.9154 |
| Listeria_monocytogenes_1639_v89                          | Listeria_monocytogenes_1639_v118 | 0.9706 |
| Listeria_monocytogenes_1639_v88                          | Listeria_monocytogenes_1639_v118 | 0.9341 |
| Listeria_monocytogenes_1639_v87                          | Listeria_monocytogenes_1639_v118 | 0.9298 |
| Listeria_monocytogenes_1639_v86                          | Listeria_monocytogenes_1639_v118 | 0.9291 |
| Listeria_monocytogenes_1639_v85                          | Listeria_monocytogenes_1639_v118 | 0.9611 |
| Listeria_monocytogenes_1639_v84                          | Listeria_monocytogenes_1639_v118 | 0.9369 |
| Listeria_monocytogenes_1639_v83                          | Listeria_monocytogenes_1639_v118 | 0.9613 |
| Listeria_monocytogenes_1639_v82                          | Listeria_monocytogenes_1639_v118 | 0.9606 |
| Listeria_monocytogenes_1639_v81                          | Listeria_monocytogenes_1639_v118 | 0.934  |
| Listeria_monocytogenes_1639_v80                          | Listeria_monocytogenes_1639_v118 | 0.9533 |
| Listeria_monocytogenes_1639_v7                           | Listeria_monocytogenes_1639_v118 | 0.9154 |
| Listeria_monocytogenes_1639_v79                          | Listeria_monocytogenes_1639_v118 | 0.9319 |
| Listeria_monocytogenes_1639_v78                          | Listeria_monocytogenes_1639_v118 | 0.9333 |
| Listeria_monocytogenes_1639_v77                          | Listeria_monocytogenes_1639_v118 | 0.9331 |
| Listeria_monocytogenes_1639_v76                          | Listeria_monocytogenes_1639_v118 | 0.9259 |
| Listeria_monocytogenes_1639_v75                          | Listeria_monocytogenes_1639_v118 | 0.91   |
| Listeria_monocytogenes_1639_v74                          | Listeria_monocytogenes_1639_v118 | 0.9287 |
| Listeria_monocytogenes_1639_v73                          | Listeria_monocytogenes_1639_v118 | 0.9276 |
| Listeria_monocytogenes_1639_v72                          | Listeria_monocytogenes_1639_v118 | 0.9601 |
| Listeria_monocytogenes_1639_v71                          | Listeria_monocytogenes_1639_v118 | 0.9172 |
| Listeria_monocytogenes_1639_v70                          | Listeria_monocytogenes_1639_v118 | 0.9303 |
| Listeria_monocytogenes_1639_v6                           | Listeria_monocytogenes_1639_v118 | 0.9148 |
| Listeria_monocytogenes_1639_v69                          | Listeria_monocytogenes_1639_v118 | 0.9633 |
| Listeria_monocytogenes_1639_v68                          | Listeria_monocytogenes_1639_v118 | 0.9359 |
| Listeria_monocytogenes_1639_v67                          | Listeria_monocytogenes_1639_v118 | 0.9515 |
| Listeria_monocytogenes_1639_v66                          | Listeria_monocytogenes_1639_v118 | 0.9375 |
| Listeria_monocytogenes_1639_v65                          | Listeria_monocytogenes_1639_v118 | 0.9296 |
| Listeria_monocytogenes_1639_v64                          | Listeria_monocytogenes_1639_v118 | 0.93   |
| Listeria_monocytogenes_1639_v63                          | Listeria_monocytogenes_1639_v118 | 0.9472 |
| Listeria_monocytogenes_1639_v62                          | Listeria_monocytogenes_1639_v118 | 0.9298 |
| Listeria_monocytogenes_1639_v61                          | Listeria_monocytogenes_1639_v118 | 0.9292 |
| Listeria_monocytogenes_1639_v60                          | Listeria_monocytogenes_1639_v118 | 0.9336 |
| Listeria_monocytogenes_1639_v5                           | Listeria_monocytogenes_1639_v118 | 0.913  |
| Listeria_monocytogenes_1639_v59                          | Listeria_monocytogenes_1639_v118 | 0.962  |
| Listeria_monocytogenes_1639_v58                          | Listeria_monocytogenes_1639_v118 | 0.9655 |
| Listeria_monocytogenes_1639_v57                          | Listeria_monocytogenes_1639_v118 | 0.9595 |
| Listeria_monocytogenes_1639_v56                          | Listeria_monocytogenes_1639_v118 | 0.9617 |
| Listeria_monocytogenes_1639_v55                          | Listeria_monocytogenes_1639_v118 | 0.9551 |
| Listeria_monocytogenes_1639_v54                          | Listeria_monocytogenes_1639_v118 | 0.9286 |
| Listeria_monocytogenes_1639_v53                          | Listeria_monocytogenes_1639_v118 | 0.9333 |
| Listeria_monocytogenes_1639_v52                          | Listeria_monocytogenes_1639_v118 | 0.958  |
| Listeria_monocytogenes_1639_v51                          | Listeria_monocytogenes_1639_v118 | 0.9559 |
| Listeria_monocytogenes_1639_v50                          | Listeria_monocytogenes_1639_v118 | 0.9256 |
| Listeria_monocytogenes_1639_v4                           | Listeria_monocytogenes_1639_v118 | 0.9257 |
| Listeria_monocytogenes_1639_v49                          | Listeria_monocytogenes_1639_v118 | 0.961  |
| Listeria_monocytogenes_1639_v48                          | Listeria_monocytogenes_1639_v118 | 0.9282 |
| Listeria_monocytogenes_1639_v47                          | Listeria_monocytogenes_1639_v118 | 0.9261 |
| Listeria_monocytogenes_1639_v46                          | Listeria_monocytogenes_1639_v118 | 0.9352 |
| Listeria_monocytogenes_1639_v45                          | Listeria_monocytogenes_1639_v118 | 0.9168 |
| Listeria_monocytogenes_1639_v44                          | Listeria_monocytogenes_1639_v118 | 0.9264 |
| Listeria_monocytogenes_1639_v43                          | Listeria_monocytogenes_1639_v118 | 0.9264 |
| Listeria_monocytogenes_1639_v42                          | Listeria_monocytogenes_1639_v118 | 0.9175 |
| Listeria_monocytogenes_1639_v41                          | Listeria_monocytogenes_1639_v118 | 0.9074 |

[illegible]



[illegible]



[illegible]

|                                                          |                                  |        |
|----------------------------------------------------------|----------------------------------|--------|
| Listeria_monocytogenes_1639_v124                         | Listeria_monocytogenes_1639_v119 | 0.9403 |
| Listeria_monocytogenes_1639_v123                         | Listeria_monocytogenes_1639_v119 | 0.9996 |
| Listeria_monocytogenes_1639_v122                         | Listeria_monocytogenes_1639_v119 | 1      |
| Listeria_monocytogenes_1639_v121                         | Listeria_monocytogenes_1639_v119 | 1      |
| Listeria_monocytogenes_1639_v120                         | Listeria_monocytogenes_1639_v119 | 0.9996 |
| Listeria_monocytogenes_1639_v11                          | Listeria_monocytogenes_1639_v119 | 0.9126 |
| Listeria_monocytogenes_1639_v119                         | Listeria_monocytogenes_1639_v119 | 0.0677 |
| Listeria_welshimeri_1643                                 | Listeria_monocytogenes_1639_v11  | 0.8548 |
| Listeria_welshimeri_serovar_6b_str_SLCC5334_386043       | Listeria_monocytogenes_1639_v11  | 0.8542 |
| Listeria_seeligeri_serovar_1_2b_str_SLCC3954_683837      | Listeria_monocytogenes_1639_v11  | 0.8608 |
| Listeria_seeligeri_FSL_S4-171_702452                     | Listeria_monocytogenes_1639_v11  | 0.8033 |
| Listeria_seeligeri_FSL_N1-067_702453                     | Listeria_monocytogenes_1639_v11  | 0.8304 |
| Listeria_seeligeri_1640_v1                               | Listeria_monocytogenes_1639_v11  | 0.8602 |
| Listeria_seeligeri_1640                                  | Listeria_monocytogenes_1639_v11  | 0.8653 |
| Listeria_monocytogenes_WSLC1042_1457188                  | Listeria_monocytogenes_1639_v11  | 0.9043 |
| Listeria_monocytogenes_WSLC1001_1457187                  | Listeria_monocytogenes_1639_v11  | 0.9388 |
| Listeria_monocytogenes_SLCC7179_879090                   | Listeria_monocytogenes_1639_v11  | 0.9397 |
| Listeria_monocytogenes_SLCC5850_882096                   | Listeria_monocytogenes_1639_v11  | 0.9389 |
| Listeria_monocytogenes_SLCC2755_932919                   | Listeria_monocytogenes_1639_v11  | 0.916  |
| Listeria_monocytogenes_SLCC2540_879089                   | Listeria_monocytogenes_1639_v11  | 0.9233 |
| Listeria_monocytogenes_SLCC2479_882020                   | Listeria_monocytogenes_1639_v11  | 0.9417 |
| Listeria_monocytogenes_SLCC2378_879088                   | Listeria_monocytogenes_1639_v11  | 0.9056 |
| Listeria_monocytogenes_SLCC2376_882097                   | Listeria_monocytogenes_1639_v11  | 0.9108 |
| Listeria_monocytogenes_SLCC2372_932920                   | Listeria_monocytogenes_1639_v11  | 0.9436 |
| Listeria_monocytogenes_serotype_4b_str_LL195_1230340     | Listeria_monocytogenes_1639_v11  | 0.911  |
| Listeria_monocytogenes_serotype_4b_str_LIS0087_1134669   | Listeria_monocytogenes_1639_v11  | 0.9272 |
| Listeria_monocytogenes_serotype_4b_str_F2365_265669      | Listeria_monocytogenes_1639_v11  | 0.911  |
| Listeria_monocytogenes_serotype_4b_str_CLIP_80459_568819 | Listeria_monocytogenes_1639_v11  | 0.912  |
| Listeria_monocytogenes_serotype_4b_str_81-0861_1196161   | Listeria_monocytogenes_1639_v11  | 0.9103 |
| Listeria_monocytogenes_serotype_4b_str_81-0592_1196160   | Listeria_monocytogenes_1639_v11  | 0.9113 |
| Listeria_monocytogenes_serotype_4b_str_81-0558_1196159   | Listeria_monocytogenes_1639_v11  | 0.9113 |
| Listeria_monocytogenes_serotype_4b_str_10-0809_1196162   | Listeria_monocytogenes_1639_v11  | 0.9113 |
| Listeria_monocytogenes_serotype_4b_str_02-6680_1196175   | Listeria_monocytogenes_1639_v11  | 0.9103 |
| Listeria_monocytogenes_serotype_4b_str_02-6679_1196174   | Listeria_monocytogenes_1639_v11  | 0.9103 |
| Listeria_monocytogenes_serotype_4b_str_02-1792_1196173   | Listeria_monocytogenes_1639_v11  | 0.9113 |
| Listeria_monocytogenes_serotype_4b_str_02-1289_1196172   | Listeria_monocytogenes_1639_v11  | 0.9113 |
| Listeria_monocytogenes_serotype_4b_str_02-1103_1196171   | Listeria_monocytogenes_1639_v11  | 0.9113 |
| Listeria_monocytogenes_serotype_3c_str_10-5027_1196195   | Listeria_monocytogenes_1639_v11  | 0.9454 |
| Listeria_monocytogenes_serotype_1_2c_str_10-5026_1196194 | Listeria_monocytogenes_1639_v11  | 0.9461 |
| Listeria_monocytogenes_serotype_1_2c_str_10-5025_1196193 | Listeria_monocytogenes_1639_v11  | 0.9461 |
| Listeria_monocytogenes_serotype_1_2b_str_10-0811_1196164 | Listeria_monocytogenes_1639_v11  | 0.9351 |
| Listeria_monocytogenes_serotype_1_2b_str_10-0810_1196163 | Listeria_monocytogenes_1639_v11  | 0.9351 |
| Listeria_monocytogenes_serotype_1_2a_str_99-6370_1196179 | Listeria_monocytogenes_1639_v11  | 0.9425 |
| Listeria_monocytogenes_serotype_1_2a_str_98-2035_1196178 | Listeria_monocytogenes_1639_v11  | 0.9425 |
| Listeria_monocytogenes_serotype_1_2a_str_95-0093_1196177 | Listeria_monocytogenes_1639_v11  | 0.9389 |
| Listeria_monocytogenes_serotype_1_2a_str_88-0478_1196176 | Listeria_monocytogenes_1639_v11  | 0.9388 |
| Listeria_monocytogenes_serotype_1_2a_str_10-5024_1196192 | Listeria_monocytogenes_1639_v11  | 0.9396 |
| Listeria_monocytogenes_serotype_1_2a_str_10-4758_1196168 | Listeria_monocytogenes_1639_v11  | 0.9408 |
| Listeria_monocytogenes_serotype_1_2a_str_10-4754_1196167 | Listeria_monocytogenes_1639_v11  | 0.9408 |
| Listeria_monocytogenes_serotype_1_2a_str_10-1321_1196191 | Listeria_monocytogenes_1639_v11  | 0.9396 |
| Listeria_monocytogenes_serotype_1_2a_str_10-1047_1196190 | Listeria_monocytogenes_1639_v11  | 0.9388 |
| Listeria_monocytogenes_serotype_1_2a_str_10-1046_1196189 | Listeria_monocytogenes_1639_v11  | 0.9388 |
| Listeria_monocytogenes_serotype_1_2a_str_10-0934_1196170 | Listeria_monocytogenes_1639_v11  | 0.9367 |
| Listeria_monocytogenes_serotype_1_2a_str_10-0933_1196169 | Listeria_monocytogenes_1639_v11  | 0.9367 |
| Listeria_monocytogenes_serotype_1_2a_str_10-0815_1196188 | Listeria_monocytogenes_1639_v11  | 0.9424 |
| Listeria_monocytogenes_serotype_1_2a_str_10-0814_1196187 | Listeria_monocytogenes_1639_v11  | 0.9392 |
| Listeria_monocytogenes_serotype_1_2a_str_10-0813_1196166 | Listeria_monocytogenes_1639_v11  | 0.9477 |
| Listeria_monocytogenes_serotype_1_2a_str_10-0812_1196165 | Listeria_monocytogenes_1639_v11  | 0.9477 |
| Listeria_monocytogenes_serotype_1_2a_str_08-7669_1196186 | Listeria_monocytogenes_1639_v11  | 0.9342 |
| Listeria_monocytogenes_serotype_1_2a_str_08-7374_1196185 | Listeria_monocytogenes_1639_v11  | 0.9396 |
| Listeria_monocytogenes_serotype_1_2a_str_08-6997_1196184 | Listeria_monocytogenes_1639_v11  | 0.9424 |
| Listeria_monocytogenes_serotype_1_2a_str_08-6569_1196183 | Listeria_monocytogenes_1639_v11  | 0.9424 |
| Listeria_monocytogenes_serotype_1_2a_str_08-6056_1196182 | Listeria_monocytogenes_1639_v11  | 0.9424 |
| Listeria_monocytogenes_serotype_1_2a_str_04-5457_1196181 | Listeria_monocytogenes_1639_v11  | 0.9396 |
| Listeria_monocytogenes_serotype_1_2a_str_02-5993_1196180 | Listeria_monocytogenes_1639_v11  | 0.9392 |
| Listeria_monocytogenes_R479a_1437838                     | Listeria_monocytogenes_1639_v11  | 0.9483 |
| Listeria_monocytogenes_N53-1_1234142                     | Listeria_monocytogenes_1639_v11  | 0.8955 |
| Listeria_monocytogenes_M7_1030009                        | Listeria_monocytogenes_1639_v11  | 0.9028 |
| Listeria_monocytogenes_LO28_393132                       | Listeria_monocytogenes_1639_v11  | 0.944  |
| Listeria_monocytogenes_L99_563174                        | Listeria_monocytogenes_1639_v11  | 0.9035 |
| Listeria_monocytogenes_L312_882094                       | Listeria_monocytogenes_1639_v11  | 0.912  |
| Listeria_monocytogenes_J1816_930781                      | Listeria_monocytogenes_1639_v11  | 0.9091 |
| Listeria_monocytogenes_J1-220_930782                     | Listeria_monocytogenes_1639_v11  | 0.9146 |
| Listeria_monocytogenes_J0161_393130                      | Listeria_monocytogenes_1639_v11  | 0.9502 |
| Listeria_monocytogenes_HCC23_552536                      | Listeria_monocytogenes_1639_v11  | 0.9028 |
| Listeria_monocytogenes_FSL_R2-561_393126                 | Listeria_monocytogenes_1639_v11  | 0.9418 |
| Listeria_monocytogenes_FSL_J1-208_393119                 | Listeria_monocytogenes_1639_v11  | 0.8825 |
| Listeria_monocytogenes_FSL_J1-175_393118                 | Listeria_monocytogenes_1639_v11  | 0.9271 |
| Listeria_monocytogenes_Finland_1998_393127               | Listeria_monocytogenes_1639_v11  | 0.9344 |
| Listeria_monocytogenes_EGD-e_169963_v1                   | Listeria_monocytogenes_1639_v11  | 0.9401 |
| Listeria_monocytogenes_EGD-e_169963                      | Listeria_monocytogenes_1639_v11  | 0.9401 |
| Listeria_monocytogenes_EGD_1334565                       | Listeria_monocytogenes_1639_v11  | 0.9396 |
| Listeria_monocytogenes_CFSAN002349_1299895               | Listeria_monocytogenes_1639_v11  | 0.9127 |
| Listeria_monocytogenes_ATCC_19117_882095_v1              | Listeria_monocytogenes_1639_v11  | 0.9091 |
| Listeria_monocytogenes_ATCC_19117_882095                 | Listeria_monocytogenes_1639_v11  | 0.9091 |
| Listeria_monocytogenes_6179_1288295                      | Listeria_monocytogenes_1639_v11  | 0.9878 |
| Listeria_monocytogenes_1639_v9                           | Listeria_monocytogenes_1639_v11  | 0.9234 |
| Listeria_monocytogenes_1639_v99                          | Listeria_monocytogenes_1639_v11  | 0.9164 |
| Listeria_monocytogenes_1639_v98                          | Listeria_monocytogenes_1639_v11  | 0.9461 |
| Listeria_monocytogenes_1639_v97                          | Listeria_monocytogenes_1639_v11  | 0.918  |
| Listeria_monocytogenes_1639_v96                          | Listeria_monocytogenes_1639_v11  | 0.9147 |

[illegible]

[illegible]

|                                                          |                                  |        |
|----------------------------------------------------------|----------------------------------|--------|
| Listeria_monocytogenes_SLCC5850_882096                   | Listeria_monocytogenes_1639_v120 | 0.9407 |
| Listeria_monocytogenes_SLCC2755_932919                   | Listeria_monocytogenes_1639_v120 | 0.9522 |
| Listeria_monocytogenes_SLCC2540_879089                   | Listeria_monocytogenes_1639_v120 | 0.9513 |
| Listeria_monocytogenes_SLCC2479_882020                   | Listeria_monocytogenes_1639_v120 | 0.9339 |
| Listeria_monocytogenes_SLCC2378_879088                   | Listeria_monocytogenes_1639_v120 | 0.9728 |
| Listeria_monocytogenes_SLCC2376_882097                   | Listeria_monocytogenes_1639_v120 | 0.9462 |
| Listeria_monocytogenes_SLCC2372_932920                   | Listeria_monocytogenes_1639_v120 | 0.9265 |
| Listeria_monocytogenes_serotype_4b_str_LL195_1230340     | Listeria_monocytogenes_1639_v120 | 0.9784 |
| Listeria_monocytogenes_serotype_4b_str_LIS0087_1134669   | Listeria_monocytogenes_1639_v120 | 0.9171 |
| Listeria_monocytogenes_serotype_4b_str_F2365_265669      | Listeria_monocytogenes_1639_v120 | 0.9784 |
| Listeria_monocytogenes_serotype_4b_str_CLIP_80459_568819 | Listeria_monocytogenes_1639_v120 | 0.9803 |
| Listeria_monocytogenes_serotype_4b_str_81-0861_1196161   | Listeria_monocytogenes_1639_v120 | 0.9618 |
| Listeria_monocytogenes_serotype_4b_str_81-0592_1196160   | Listeria_monocytogenes_1639_v120 | 0.9629 |
| Listeria_monocytogenes_serotype_4b_str_81-0558_1196159   | Listeria_monocytogenes_1639_v120 | 0.9617 |
| Listeria_monocytogenes_serotype_4b_str_10-0809_1196162   | Listeria_monocytogenes_1639_v120 | 0.9629 |
| Listeria_monocytogenes_serotype_4b_str_02-6680_1196175   | Listeria_monocytogenes_1639_v120 | 0.9773 |
| Listeria_monocytogenes_serotype_4b_str_02-6679_1196174   | Listeria_monocytogenes_1639_v120 | 0.9773 |
| Listeria_monocytogenes_serotype_4b_str_02-1792_1196173   | Listeria_monocytogenes_1639_v120 | 0.9629 |
| Listeria_monocytogenes_serotype_4b_str_02-1289_1196172   | Listeria_monocytogenes_1639_v120 | 0.9629 |
| Listeria_monocytogenes_serotype_4b_str_02-1103_1196171   | Listeria_monocytogenes_1639_v120 | 0.9629 |
| Listeria_monocytogenes_serotype_3c_str_10-5027_1196195   | Listeria_monocytogenes_1639_v120 | 0.9331 |
| Listeria_monocytogenes_serotype_1_2c_str_10-5026_1196194 | Listeria_monocytogenes_1639_v120 | 0.9339 |
| Listeria_monocytogenes_serotype_1_2c_str_10-5025_1196193 | Listeria_monocytogenes_1639_v120 | 0.9339 |
| Listeria_monocytogenes_serotype_1_2b_str_10-0811_1196164 | Listeria_monocytogenes_1639_v120 | 0.9462 |
| Listeria_monocytogenes_serotype_1_2b_str_10-0810_1196163 | Listeria_monocytogenes_1639_v120 | 0.9462 |
| Listeria_monocytogenes_serotype_1_2a_str_99-6370_1196179 | Listeria_monocytogenes_1639_v120 | 0.9206 |
| Listeria_monocytogenes_serotype_1_2a_str_98-2035_1196178 | Listeria_monocytogenes_1639_v120 | 0.9206 |
| Listeria_monocytogenes_serotype_1_2a_str_95-0093_1196177 | Listeria_monocytogenes_1639_v120 | 0.9261 |
| Listeria_monocytogenes_serotype_1_2a_str_88-0478_1196176 | Listeria_monocytogenes_1639_v120 | 0.9249 |
| Listeria_monocytogenes_serotype_1_2a_str_10-5024_1196192 | Listeria_monocytogenes_1639_v120 | 0.9261 |
| Listeria_monocytogenes_serotype_1_2a_str_10-4758_1196168 | Listeria_monocytogenes_1639_v120 | 0.942  |
| Listeria_monocytogenes_serotype_1_2a_str_10-4754_1196167 | Listeria_monocytogenes_1639_v120 | 0.942  |
| Listeria_monocytogenes_serotype_1_2a_str_10-1321_1196191 | Listeria_monocytogenes_1639_v120 | 0.9261 |
| Listeria_monocytogenes_serotype_1_2a_str_10-1047_1196190 | Listeria_monocytogenes_1639_v120 | 0.9267 |
| Listeria_monocytogenes_serotype_1_2a_str_10-1046_1196189 | Listeria_monocytogenes_1639_v120 | 0.9267 |
| Listeria_monocytogenes_serotype_1_2a_str_10-0934_1196170 | Listeria_monocytogenes_1639_v120 | 0.9532 |
| Listeria_monocytogenes_serotype_1_2a_str_10-0933_1196169 | Listeria_monocytogenes_1639_v120 | 0.9532 |
| Listeria_monocytogenes_serotype_1_2a_str_10-0815_1196188 | Listeria_monocytogenes_1639_v120 | 0.9219 |
| Listeria_monocytogenes_serotype_1_2a_str_10-0814_1196187 | Listeria_monocytogenes_1639_v120 | 0.9264 |
| Listeria_monocytogenes_serotype_1_2a_str_10-0813_1196166 | Listeria_monocytogenes_1639_v120 | 0.934  |
| Listeria_monocytogenes_serotype_1_2a_str_10-0812_1196165 | Listeria_monocytogenes_1639_v120 | 0.934  |
| Listeria_monocytogenes_serotype_1_2a_str_08-7669_1196186 | Listeria_monocytogenes_1639_v120 | 0.9355 |
| Listeria_monocytogenes_serotype_1_2a_str_08-7374_1196185 | Listeria_monocytogenes_1639_v120 | 0.9261 |
| Listeria_monocytogenes_serotype_1_2a_str_08-6997_1196184 | Listeria_monocytogenes_1639_v120 | 0.9219 |
| Listeria_monocytogenes_serotype_1_2a_str_08-6569_1196183 | Listeria_monocytogenes_1639_v120 | 0.9219 |
| Listeria_monocytogenes_serotype_1_2a_str_08-6056_1196182 | Listeria_monocytogenes_1639_v120 | 0.9219 |
| Listeria_monocytogenes_serotype_1_2a_str_04-5457_1196181 | Listeria_monocytogenes_1639_v120 | 0.9261 |
| Listeria_monocytogenes_serotype_1_2a_str_02-5993_1196180 | Listeria_monocytogenes_1639_v120 | 0.9261 |
| Listeria_monocytogenes_R479a_1437838                     | Listeria_monocytogenes_1639_v120 | 0.9257 |
| Listeria_monocytogenes_N53-1_1234142                     | Listeria_monocytogenes_1639_v120 | 0.8972 |
| Listeria_monocytogenes_M7_1030009                        | Listeria_monocytogenes_1639_v120 | 0.9093 |
| Listeria_monocytogenes_LO28_393132                       | Listeria_monocytogenes_1639_v120 | 0.9325 |
| Listeria_monocytogenes_L99_563174                        | Listeria_monocytogenes_1639_v120 | 0.9096 |
| Listeria_monocytogenes_L312_882094                       | Listeria_monocytogenes_1639_v120 | 0.9807 |
| Listeria_monocytogenes_J1816_930781                      | Listeria_monocytogenes_1639_v120 | 0.9619 |
| Listeria_monocytogenes_J1-220_930782                     | Listeria_monocytogenes_1639_v120 | 0.9523 |
| Listeria_monocytogenes_J0161_393130                      | Listeria_monocytogenes_1639_v120 | 0.9313 |
| Listeria_monocytogenes_HCC23_552536                      | Listeria_monocytogenes_1639_v120 | 0.9089 |
| Listeria_monocytogenes_FSL_R2-561_393126                 | Listeria_monocytogenes_1639_v120 | 0.9324 |
| Listeria_monocytogenes_FSL_J1-208_393119                 | Listeria_monocytogenes_1639_v120 | 0.9212 |
| Listeria_monocytogenes_FSL_J1-175_393118                 | Listeria_monocytogenes_1639_v120 | 0.9614 |
| Listeria_monocytogenes_Finland_1998_393127               | Listeria_monocytogenes_1639_v120 | 0.9536 |
| Listeria_monocytogenes_EGD-e_169963_v1                   | Listeria_monocytogenes_1639_v120 | 0.9421 |
| Listeria_monocytogenes_EGD-e_169963                      | Listeria_monocytogenes_1639_v120 | 0.9424 |
| Listeria_monocytogenes_EGD_1334565                       | Listeria_monocytogenes_1639_v120 | 0.9415 |
| Listeria_monocytogenes_CFSAN002349_1299895               | Listeria_monocytogenes_1639_v120 | 0.9996 |
| Listeria_monocytogenes_ATCC_19117_882095_v1              | Listeria_monocytogenes_1639_v120 | 0.9728 |
| Listeria_monocytogenes_ATCC_19117_882095                 | Listeria_monocytogenes_1639_v120 | 0.9724 |
| Listeria_monocytogenes_6179_1288295                      | Listeria_monocytogenes_1639_v120 | 0.9152 |
| Listeria_monocytogenes_1639_v9                           | Listeria_monocytogenes_1639_v120 | 0.9317 |
| Listeria_monocytogenes_1639_v99                          | Listeria_monocytogenes_1639_v120 | 0.9631 |
| Listeria_monocytogenes_1639_v98                          | Listeria_monocytogenes_1639_v120 | 0.9286 |
| Listeria_monocytogenes_1639_v97                          | Listeria_monocytogenes_1639_v120 | 0.9688 |
| Listeria_monocytogenes_1639_v96                          | Listeria_monocytogenes_1639_v120 | 0.9623 |
| Listeria_monocytogenes_1639_v95                          | Listeria_monocytogenes_1639_v120 | 0.9623 |
| Listeria_monocytogenes_1639_v94                          | Listeria_monocytogenes_1639_v120 | 0.9627 |
| Listeria_monocytogenes_1639_v93                          | Listeria_monocytogenes_1639_v120 | 0.9294 |
| Listeria_monocytogenes_1639_v92                          | Listeria_monocytogenes_1639_v120 | 0.9627 |
| Listeria_monocytogenes_1639_v91                          | Listeria_monocytogenes_1639_v120 | 0.9581 |
| Listeria_monocytogenes_1639_v90                          | Listeria_monocytogenes_1639_v120 | 0.9286 |
| Listeria_monocytogenes_1639_v8                           | Listeria_monocytogenes_1639_v120 | 0.9151 |
| Listeria_monocytogenes_1639_v89                          | Listeria_monocytogenes_1639_v120 | 0.9706 |
| Listeria_monocytogenes_1639_v88                          | Listeria_monocytogenes_1639_v120 | 0.9337 |
| Listeria_monocytogenes_1639_v87                          | Listeria_monocytogenes_1639_v120 | 0.9294 |
| Listeria_monocytogenes_1639_v86                          | Listeria_monocytogenes_1639_v120 | 0.9291 |
| Listeria_monocytogenes_1639_v85                          | Listeria_monocytogenes_1639_v120 | 0.9615 |
| Listeria_monocytogenes_1639_v84                          | Listeria_monocytogenes_1639_v120 | 0.9366 |
| Listeria_monocytogenes_1639_v83                          | Listeria_monocytogenes_1639_v120 | 0.9613 |
| Listeria_monocytogenes_1639_v82                          | Listeria_monocytogenes_1639_v120 | 0.961  |
| Listeria_monocytogenes_1639_v81                          | Listeria_monocytogenes_1639_v120 | 0.9337 |
| Listeria_monocytogenes_1639_v80                          | Listeria_monocytogenes_1639_v120 | 0.9529 |

[illegible]



|                                                          |                                  |        |
|----------------------------------------------------------|----------------------------------|--------|
| Listeria_monocytogenes_1639_v177                         | Listeria_monocytogenes_1639_v120 | 0.9827 |
| Listeria_monocytogenes_1639_v176                         | Listeria_monocytogenes_1639_v120 | 0.944  |
| Listeria_monocytogenes_1639_v175                         | Listeria_monocytogenes_1639_v120 | 0.942  |
| Listeria_monocytogenes_1639_v174                         | Listeria_monocytogenes_1639_v120 | 0.9536 |
| Listeria_monocytogenes_1639_v173                         | Listeria_monocytogenes_1639_v120 | 0.971  |
| Listeria_monocytogenes_1639_v172                         | Listeria_monocytogenes_1639_v120 | 0.9426 |
| Listeria_monocytogenes_1639_v171                         | Listeria_monocytogenes_1639_v120 | 0.9386 |
| Listeria_monocytogenes_1639_v170                         | Listeria_monocytogenes_1639_v120 | 0.9469 |
| Listeria_monocytogenes_1639_v16                          | Listeria_monocytogenes_1639_v120 | 0.9124 |
| Listeria_monocytogenes_1639_v169                         | Listeria_monocytogenes_1639_v120 | 0.9466 |
| Listeria_monocytogenes_1639_v168                         | Listeria_monocytogenes_1639_v120 | 0.9471 |
| Listeria_monocytogenes_1639_v167                         | Listeria_monocytogenes_1639_v120 | 0.9396 |
| Listeria_monocytogenes_1639_v166                         | Listeria_monocytogenes_1639_v120 | 0.9474 |
| Listeria_monocytogenes_1639_v165                         | Listeria_monocytogenes_1639_v120 | 0.9466 |
| Listeria_monocytogenes_1639_v164                         | Listeria_monocytogenes_1639_v120 | 0.978  |
| Listeria_monocytogenes_1639_v163                         | Listeria_monocytogenes_1639_v120 | 0.968  |
| Listeria_monocytogenes_1639_v162                         | Listeria_monocytogenes_1639_v120 | 0.978  |
| Listeria_monocytogenes_1639_v161                         | Listeria_monocytogenes_1639_v120 | 0.978  |
| Listeria_monocytogenes_1639_v160                         | Listeria_monocytogenes_1639_v120 | 0.978  |
| Listeria_monocytogenes_1639_v15                          | Listeria_monocytogenes_1639_v120 | 0.9323 |
| Listeria_monocytogenes_1639_v159                         | Listeria_monocytogenes_1639_v120 | 0.9827 |
| Listeria_monocytogenes_1639_v158                         | Listeria_monocytogenes_1639_v120 | 0.9788 |
| Listeria_monocytogenes_1639_v157                         | Listeria_monocytogenes_1639_v120 | 0.9784 |
| Listeria_monocytogenes_1639_v156                         | Listeria_monocytogenes_1639_v120 | 0.9308 |
| Listeria_monocytogenes_1639_v155                         | Listeria_monocytogenes_1639_v120 | 0.941  |
| Listeria_monocytogenes_1639_v154                         | Listeria_monocytogenes_1639_v120 | 0.9448 |
| Listeria_monocytogenes_1639_v153                         | Listeria_monocytogenes_1639_v120 | 0.9417 |
| Listeria_monocytogenes_1639_v152                         | Listeria_monocytogenes_1639_v120 | 0.9827 |
| Listeria_monocytogenes_1639_v151                         | Listeria_monocytogenes_1639_v120 | 0.9827 |
| Listeria_monocytogenes_1639_v150                         | Listeria_monocytogenes_1639_v120 | 0.9433 |
| Listeria_monocytogenes_1639_v14                          | Listeria_monocytogenes_1639_v120 | 0.9392 |
| Listeria_monocytogenes_1639_v149                         | Listeria_monocytogenes_1639_v120 | 0.9419 |
| Listeria_monocytogenes_1639_v148                         | Listeria_monocytogenes_1639_v120 | 0.9816 |
| Listeria_monocytogenes_1639_v147                         | Listeria_monocytogenes_1639_v120 | 0.9678 |
| Listeria_monocytogenes_1639_v146                         | Listeria_monocytogenes_1639_v120 | 0.9513 |
| Listeria_monocytogenes_1639_v145                         | Listeria_monocytogenes_1639_v120 | 0.9468 |
| Listeria_monocytogenes_1639_v144                         | Listeria_monocytogenes_1639_v120 | 0.9803 |
| Listeria_monocytogenes_1639_v143                         | Listeria_monocytogenes_1639_v120 | 0.9514 |
| Listeria_monocytogenes_1639_v142                         | Listeria_monocytogenes_1639_v120 | 0.9807 |
| Listeria_monocytogenes_1639_v141                         | Listeria_monocytogenes_1639_v120 | 0.9722 |
| Listeria_monocytogenes_1639_v140                         | Listeria_monocytogenes_1639_v120 | 0.9811 |
| Listeria_monocytogenes_1639_v13                          | Listeria_monocytogenes_1639_v120 | 0.9319 |
| Listeria_monocytogenes_1639_v139                         | Listeria_monocytogenes_1639_v120 | 0.98   |
| Listeria_monocytogenes_1639_v138                         | Listeria_monocytogenes_1639_v120 | 0.9834 |
| Listeria_monocytogenes_1639_v137                         | Listeria_monocytogenes_1639_v120 | 0.9827 |
| Listeria_monocytogenes_1639_v136                         | Listeria_monocytogenes_1639_v120 | 0.9416 |
| Listeria_monocytogenes_1639_v135                         | Listeria_monocytogenes_1639_v120 | 0.9213 |
| Listeria_monocytogenes_1639_v134                         | Listeria_monocytogenes_1639_v120 | 0.9728 |
| Listeria_monocytogenes_1639_v133                         | Listeria_monocytogenes_1639_v120 | 0.9387 |
| Listeria_monocytogenes_1639_v132                         | Listeria_monocytogenes_1639_v120 | 0.9218 |
| Listeria_monocytogenes_1639_v131                         | Listeria_monocytogenes_1639_v120 | 0.9703 |
| Listeria_monocytogenes_1639_v130                         | Listeria_monocytogenes_1639_v120 | 0.9335 |
| Listeria_monocytogenes_1639_v12                          | Listeria_monocytogenes_1639_v120 | 0.9132 |
| Listeria_monocytogenes_1639_v129                         | Listeria_monocytogenes_1639_v120 | 0.9703 |
| Listeria_monocytogenes_1639_v128                         | Listeria_monocytogenes_1639_v120 | 0.9681 |
| Listeria_monocytogenes_1639_v127                         | Listeria_monocytogenes_1639_v120 | 0.9417 |
| Listeria_monocytogenes_1639_v126                         | Listeria_monocytogenes_1639_v120 | 0.9662 |
| Listeria_monocytogenes_1639_v125                         | Listeria_monocytogenes_1639_v120 | 0.9384 |
| Listeria_monocytogenes_1639_v124                         | Listeria_monocytogenes_1639_v120 | 0.9399 |
| Listeria_monocytogenes_1639_v123                         | Listeria_monocytogenes_1639_v120 | 0.9996 |
| Listeria_monocytogenes_1639_v122                         | Listeria_monocytogenes_1639_v120 | 0.9996 |
| Listeria_monocytogenes_1639_v121                         | Listeria_monocytogenes_1639_v120 | 0.9996 |
| Listeria_monocytogenes_1639_v120                         | Listeria_monocytogenes_1639_v120 | 0.0676 |
| Listeria_welshimeri_1643                                 | Listeria_monocytogenes_1639_v121 | 0.8835 |
| Listeria_welshimeri_serovar_6b_str_SLCC5334_386043       | Listeria_monocytogenes_1639_v121 | 0.8829 |
| Listeria_seeligeri_serovar_1_2b_str_SLCC3954_683837      | Listeria_monocytogenes_1639_v121 | 0.8908 |
| Listeria_seeligeri_FSL_S4-171_702452                     | Listeria_monocytogenes_1639_v121 | 0.8311 |
| Listeria_seeligeri_FSL_N1-067_702453                     | Listeria_monocytogenes_1639_v121 | 0.8296 |
| Listeria_seeligeri_1640_v1                               | Listeria_monocytogenes_1639_v121 | 0.8988 |
| Listeria_seeligeri_1640                                  | Listeria_monocytogenes_1639_v121 | 0.8869 |
| Listeria_monocytogenes_WSLC1042_1457188                  | Listeria_monocytogenes_1639_v121 | 0.9721 |
| Listeria_monocytogenes_WSLC1001_1457187                  | Listeria_monocytogenes_1639_v121 | 0.9368 |
| Listeria_monocytogenes_SLCC7179_879090                   | Listeria_monocytogenes_1639_v121 | 0.9424 |
| Listeria_monocytogenes_SLCC5850_882096                   | Listeria_monocytogenes_1639_v121 | 0.9411 |
| Listeria_monocytogenes_SLCC2755_932919                   | Listeria_monocytogenes_1639_v121 | 0.9526 |
| Listeria_monocytogenes_SLCC2540_879089                   | Listeria_monocytogenes_1639_v121 | 0.9516 |
| Listeria_monocytogenes_SLCC2479_882020                   | Listeria_monocytogenes_1639_v121 | 0.9339 |
| Listeria_monocytogenes_SLCC2378_879088                   | Listeria_monocytogenes_1639_v121 | 0.9732 |
| Listeria_monocytogenes_SLCC2376_882097                   | Listeria_monocytogenes_1639_v121 | 0.9462 |
| Listeria_monocytogenes_SLCC2372_932920                   | Listeria_monocytogenes_1639_v121 | 0.9265 |
| Listeria_monocytogenes_serotype_4b_str_LL195_1230340     | Listeria_monocytogenes_1639_v121 | 0.9788 |
| Listeria_monocytogenes_serotype_4b_str_LIS0087_1134669   | Listeria_monocytogenes_1639_v121 | 0.9171 |
| Listeria_monocytogenes_serotype_4b_str_F2365_265669      | Listeria_monocytogenes_1639_v121 | 0.9788 |
| Listeria_monocytogenes_serotype_4b_str_CLIP_80459_568819 | Listeria_monocytogenes_1639_v121 | 0.9807 |
| Listeria_monocytogenes_serotype_4b_str_81-0861_1196161   | Listeria_monocytogenes_1639_v121 | 0.9618 |
| Listeria_monocytogenes_serotype_4b_str_81-0592_1196160   | Listeria_monocytogenes_1639_v121 | 0.9629 |
| Listeria_monocytogenes_serotype_4b_str_81-0558_1196159   | Listeria_monocytogenes_1639_v121 | 0.9621 |
| Listeria_monocytogenes_serotype_4b_str_10-0809_1196162   | Listeria_monocytogenes_1639_v121 | 0.9629 |
| Listeria_monocytogenes_serotype_4b_str_02-6680_1196175   | Listeria_monocytogenes_1639_v121 | 0.9769 |
| Listeria_monocytogenes_serotype_4b_str_02-6679_1196174   | Listeria_monocytogenes_1639_v121 | 0.9769 |
| Listeria_monocytogenes_serotype_4b_str_02-1792_1196173   | Listeria_monocytogenes_1639_v121 | 0.9633 |

|                                                          |                                  |        |
|----------------------------------------------------------|----------------------------------|--------|
| Listeria_monocytogenes_serotype_4b_str_02-1289_1196172   | Listeria_monocytogenes_1639_v121 | 0.9633 |
| Listeria_monocytogenes_serotype_4b_str_02-1103_1196171   | Listeria_monocytogenes_1639_v121 | 0.9633 |
| Listeria_monocytogenes_serotype_3c_str_10-5027_1196195   | Listeria_monocytogenes_1639_v121 | 0.9331 |
| Listeria_monocytogenes_serotype_1_2c_str_10-5026_1196194 | Listeria_monocytogenes_1639_v121 | 0.9342 |
| Listeria_monocytogenes_serotype_1_2c_str_10-5025_1196193 | Listeria_monocytogenes_1639_v121 | 0.9342 |
| Listeria_monocytogenes_serotype_1_2b_str_10-0811_1196164 | Listeria_monocytogenes_1639_v121 | 0.9462 |
| Listeria_monocytogenes_serotype_1_2b_str_10-0810_1196163 | Listeria_monocytogenes_1639_v121 | 0.9462 |
| Listeria_monocytogenes_serotype_1_2a_str_99-6370_1196179 | Listeria_monocytogenes_1639_v121 | 0.9206 |
| Listeria_monocytogenes_serotype_1_2a_str_98-2035_1196178 | Listeria_monocytogenes_1639_v121 | 0.9206 |
| Listeria_monocytogenes_serotype_1_2a_str_95-0093_1196177 | Listeria_monocytogenes_1639_v121 | 0.9261 |
| Listeria_monocytogenes_serotype_1_2a_str_88-0478_1196176 | Listeria_monocytogenes_1639_v121 | 0.9252 |
| Listeria_monocytogenes_serotype_1_2a_str_10-5024_1196192 | Listeria_monocytogenes_1639_v121 | 0.9264 |
| Listeria_monocytogenes_serotype_1_2a_str_10-4758_1196168 | Listeria_monocytogenes_1639_v121 | 0.9423 |
| Listeria_monocytogenes_serotype_1_2a_str_10-4754_1196167 | Listeria_monocytogenes_1639_v121 | 0.942  |
| Listeria_monocytogenes_serotype_1_2a_str_10-1321_1196191 | Listeria_monocytogenes_1639_v121 | 0.9264 |
| Listeria_monocytogenes_serotype_1_2a_str_10-1047_1196190 | Listeria_monocytogenes_1639_v121 | 0.9267 |
| Listeria_monocytogenes_serotype_1_2a_str_10-1046_1196189 | Listeria_monocytogenes_1639_v121 | 0.9267 |
| Listeria_monocytogenes_serotype_1_2a_str_10-0934_1196170 | Listeria_monocytogenes_1639_v121 | 0.9532 |
| Listeria_monocytogenes_serotype_1_2a_str_10-0933_1196169 | Listeria_monocytogenes_1639_v121 | 0.9532 |
| Listeria_monocytogenes_serotype_1_2a_str_10-0815_1196188 | Listeria_monocytogenes_1639_v121 | 0.9219 |
| Listeria_monocytogenes_serotype_1_2a_str_10-0814_1196187 | Listeria_monocytogenes_1639_v121 | 0.9264 |
| Listeria_monocytogenes_serotype_1_2a_str_10-0813_1196166 | Listeria_monocytogenes_1639_v121 | 0.934  |
| Listeria_monocytogenes_serotype_1_2a_str_10-0812_1196165 | Listeria_monocytogenes_1639_v121 | 0.934  |
| Listeria_monocytogenes_serotype_1_2a_str_08-7669_1196186 | Listeria_monocytogenes_1639_v121 | 0.9355 |
| Listeria_monocytogenes_serotype_1_2a_str_08-7374_1196185 | Listeria_monocytogenes_1639_v121 | 0.9264 |
| Listeria_monocytogenes_serotype_1_2a_str_08-6997_1196184 | Listeria_monocytogenes_1639_v121 | 0.9219 |
| Listeria_monocytogenes_serotype_1_2a_str_08-6569_1196183 | Listeria_monocytogenes_1639_v121 | 0.9219 |
| Listeria_monocytogenes_serotype_1_2a_str_08-6056_1196182 | Listeria_monocytogenes_1639_v121 | 0.9219 |
| Listeria_monocytogenes_serotype_1_2a_str_04-5457_1196181 | Listeria_monocytogenes_1639_v121 | 0.9264 |
| Listeria_monocytogenes_serotype_1_2a_str_02-5993_1196180 | Listeria_monocytogenes_1639_v121 | 0.9261 |
| Listeria_monocytogenes_R479a_1437838                     | Listeria_monocytogenes_1639_v121 | 0.9257 |
| Listeria_monocytogenes_N53-1_1234142                     | Listeria_monocytogenes_1639_v121 | 0.8972 |
| Listeria_monocytogenes_M7_1030009                        | Listeria_monocytogenes_1639_v121 | 0.9093 |
| Listeria_monocytogenes_LO28_393132                       | Listeria_monocytogenes_1639_v121 | 0.9325 |
| Listeria_monocytogenes_L99_563174                        | Listeria_monocytogenes_1639_v121 | 0.91   |
| Listeria_monocytogenes_L312_882094                       | Listeria_monocytogenes_1639_v121 | 0.9811 |
| Listeria_monocytogenes_J1816_930781                      | Listeria_monocytogenes_1639_v121 | 0.9619 |
| Listeria_monocytogenes_J1-220_930782                     | Listeria_monocytogenes_1639_v121 | 0.9523 |
| Listeria_monocytogenes_J0161_393130                      | Listeria_monocytogenes_1639_v121 | 0.9317 |
| Listeria_monocytogenes_HCC23_552536                      | Listeria_monocytogenes_1639_v121 | 0.9093 |
| Listeria_monocytogenes_FSL_R2-561_393126                 | Listeria_monocytogenes_1639_v121 | 0.9324 |
| Listeria_monocytogenes_FSL_J1-208_393119                 | Listeria_monocytogenes_1639_v121 | 0.9212 |
| Listeria_monocytogenes_FSL_J1-175_393118                 | Listeria_monocytogenes_1639_v121 | 0.9614 |
| Listeria_monocytogenes_Finland_1998_393127               | Listeria_monocytogenes_1639_v121 | 0.9536 |
| Listeria_monocytogenes_EGD-e_169963_v1                   | Listeria_monocytogenes_1639_v121 | 0.9421 |
| Listeria_monocytogenes_EGD-e_169963                      | Listeria_monocytogenes_1639_v121 | 0.9424 |
| Listeria_monocytogenes_EGD_1334565                       | Listeria_monocytogenes_1639_v121 | 0.9419 |
| Listeria_monocytogenes_CFSAN002349_1299895               | Listeria_monocytogenes_1639_v121 | 0.9996 |
| Listeria_monocytogenes_ATCC_19117_882095_v1              | Listeria_monocytogenes_1639_v121 | 0.9728 |
| Listeria_monocytogenes_ATCC_19117_882095                 | Listeria_monocytogenes_1639_v121 | 0.9727 |
| Listeria_monocytogenes_6179_1288295                      | Listeria_monocytogenes_1639_v121 | 0.9155 |
| Listeria_monocytogenes_1639_v9                           | Listeria_monocytogenes_1639_v121 | 0.9317 |
| Listeria_monocytogenes_1639_v99                          | Listeria_monocytogenes_1639_v121 | 0.9634 |
| Listeria_monocytogenes_1639_v98                          | Listeria_monocytogenes_1639_v121 | 0.9289 |
| Listeria_monocytogenes_1639_v97                          | Listeria_monocytogenes_1639_v121 | 0.9688 |
| Listeria_monocytogenes_1639_v96                          | Listeria_monocytogenes_1639_v121 | 0.9627 |
| Listeria_monocytogenes_1639_v95                          | Listeria_monocytogenes_1639_v121 | 0.9627 |
| Listeria_monocytogenes_1639_v94                          | Listeria_monocytogenes_1639_v121 | 0.9627 |
| Listeria_monocytogenes_1639_v93                          | Listeria_monocytogenes_1639_v121 | 0.9294 |
| Listeria_monocytogenes_1639_v92                          | Listeria_monocytogenes_1639_v121 | 0.9631 |
| Listeria_monocytogenes_1639_v91                          | Listeria_monocytogenes_1639_v121 | 0.9585 |
| Listeria_monocytogenes_1639_v90                          | Listeria_monocytogenes_1639_v121 | 0.9289 |
| Listeria_monocytogenes_1639_v8                           | Listeria_monocytogenes_1639_v121 | 0.9154 |
| Listeria_monocytogenes_1639_v89                          | Listeria_monocytogenes_1639_v121 | 0.9706 |
| Listeria_monocytogenes_1639_v88                          | Listeria_monocytogenes_1639_v121 | 0.9341 |
| Listeria_monocytogenes_1639_v87                          | Listeria_monocytogenes_1639_v121 | 0.9298 |
| Listeria_monocytogenes_1639_v86                          | Listeria_monocytogenes_1639_v121 | 0.9291 |
| Listeria_monocytogenes_1639_v85                          | Listeria_monocytogenes_1639_v121 | 0.9611 |
| Listeria_monocytogenes_1639_v84                          | Listeria_monocytogenes_1639_v121 | 0.9369 |
| Listeria_monocytogenes_1639_v83                          | Listeria_monocytogenes_1639_v121 | 0.9613 |
| Listeria_monocytogenes_1639_v82                          | Listeria_monocytogenes_1639_v121 | 0.9606 |
| Listeria_monocytogenes_1639_v81                          | Listeria_monocytogenes_1639_v121 | 0.934  |
| Listeria_monocytogenes_1639_v80                          | Listeria_monocytogenes_1639_v121 | 0.9533 |
| Listeria_monocytogenes_1639_v7                           | Listeria_monocytogenes_1639_v121 | 0.9154 |
| Listeria_monocytogenes_1639_v79                          | Listeria_monocytogenes_1639_v121 | 0.9319 |
| Listeria_monocytogenes_1639_v78                          | Listeria_monocytogenes_1639_v121 | 0.9333 |
| Listeria_monocytogenes_1639_v77                          | Listeria_monocytogenes_1639_v121 | 0.9331 |
| Listeria_monocytogenes_1639_v76                          | Listeria_monocytogenes_1639_v121 | 0.9259 |
| Listeria_monocytogenes_1639_v75                          | Listeria_monocytogenes_1639_v121 | 0.91   |
| Listeria_monocytogenes_1639_v74                          | Listeria_monocytogenes_1639_v121 | 0.9287 |
| Listeria_monocytogenes_1639_v73                          | Listeria_monocytogenes_1639_v121 | 0.9276 |
| Listeria_monocytogenes_1639_v72                          | Listeria_monocytogenes_1639_v121 | 0.9601 |
| Listeria_monocytogenes_1639_v71                          | Listeria_monocytogenes_1639_v121 | 0.9172 |
| Listeria_monocytogenes_1639_v70                          | Listeria_monocytogenes_1639_v121 | 0.9303 |
| Listeria_monocytogenes_1639_v6                           | Listeria_monocytogenes_1639_v121 | 0.9148 |
| Listeria_monocytogenes_1639_v69                          | Listeria_monocytogenes_1639_v121 | 0.9633 |
| Listeria_monocytogenes_1639_v68                          | Listeria_monocytogenes_1639_v121 | 0.9359 |
| Listeria_monocytogenes_1639_v67                          | Listeria_monocytogenes_1639_v121 | 0.9515 |
| Listeria_monocytogenes_1639_v66                          | Listeria_monocytogenes_1639_v121 | 0.9375 |
| Listeria_monocytogenes_1639_v65                          | Listeria_monocytogenes_1639_v121 | 0.9296 |
| Listeria_monocytogenes_1639_v64                          | Listeria_monocytogenes_1639_v121 | 0.93   |

[illegible]

|                                                          |                                  |        |
|----------------------------------------------------------|----------------------------------|--------|
| Listeria_monocytogenes_1639_v160                         | Listeria_monocytogenes_1639_v121 | 0.978  |
| Listeria_monocytogenes_1639_v15                          | Listeria_monocytogenes_1639_v121 | 0.9323 |
| Listeria_monocytogenes_1639_v159                         | Listeria_monocytogenes_1639_v121 | 0.9827 |
| Listeria_monocytogenes_1639_v158                         | Listeria_monocytogenes_1639_v121 | 0.9792 |
| Listeria_monocytogenes_1639_v157                         | Listeria_monocytogenes_1639_v121 | 0.9788 |
| Listeria_monocytogenes_1639_v156                         | Listeria_monocytogenes_1639_v121 | 0.9308 |
| Listeria_monocytogenes_1639_v155                         | Listeria_monocytogenes_1639_v121 | 0.9413 |
| Listeria_monocytogenes_1639_v154                         | Listeria_monocytogenes_1639_v121 | 0.9452 |
| Listeria_monocytogenes_1639_v153                         | Listeria_monocytogenes_1639_v121 | 0.9421 |
| Listeria_monocytogenes_1639_v152                         | Listeria_monocytogenes_1639_v121 | 0.9831 |
| Listeria_monocytogenes_1639_v151                         | Listeria_monocytogenes_1639_v121 | 0.9831 |
| Listeria_monocytogenes_1639_v150                         | Listeria_monocytogenes_1639_v121 | 0.9433 |
| Listeria_monocytogenes_1639_v14                          | Listeria_monocytogenes_1639_v121 | 0.9396 |
| Listeria_monocytogenes_1639_v149                         | Listeria_monocytogenes_1639_v121 | 0.9419 |
| Listeria_monocytogenes_1639_v148                         | Listeria_monocytogenes_1639_v121 | 0.9816 |
| Listeria_monocytogenes_1639_v147                         | Listeria_monocytogenes_1639_v121 | 0.9678 |
| Listeria_monocytogenes_1639_v146                         | Listeria_monocytogenes_1639_v121 | 0.9517 |
| Listeria_monocytogenes_1639_v145                         | Listeria_monocytogenes_1639_v121 | 0.9464 |
| Listeria_monocytogenes_1639_v144                         | Listeria_monocytogenes_1639_v121 | 0.9803 |
| Listeria_monocytogenes_1639_v143                         | Listeria_monocytogenes_1639_v121 | 0.9518 |
| Listeria_monocytogenes_1639_v142                         | Listeria_monocytogenes_1639_v121 | 0.9807 |
| Listeria_monocytogenes_1639_v141                         | Listeria_monocytogenes_1639_v121 | 0.9726 |
| Listeria_monocytogenes_1639_v140                         | Listeria_monocytogenes_1639_v121 | 0.9811 |
| Listeria_monocytogenes_1639_v13                          | Listeria_monocytogenes_1639_v121 | 0.9322 |
| Listeria_monocytogenes_1639_v139                         | Listeria_monocytogenes_1639_v121 | 0.98   |
| Listeria_monocytogenes_1639_v138                         | Listeria_monocytogenes_1639_v121 | 0.983  |
| Listeria_monocytogenes_1639_v137                         | Listeria_monocytogenes_1639_v121 | 0.9827 |
| Listeria_monocytogenes_1639_v136                         | Listeria_monocytogenes_1639_v121 | 0.9416 |
| Listeria_monocytogenes_1639_v135                         | Listeria_monocytogenes_1639_v121 | 0.9213 |
| Listeria_monocytogenes_1639_v134                         | Listeria_monocytogenes_1639_v121 | 0.9731 |
| Listeria_monocytogenes_1639_v133                         | Listeria_monocytogenes_1639_v121 | 0.9387 |
| Listeria_monocytogenes_1639_v132                         | Listeria_monocytogenes_1639_v121 | 0.9221 |
| Listeria_monocytogenes_1639_v131                         | Listeria_monocytogenes_1639_v121 | 0.9707 |
| Listeria_monocytogenes_1639_v130                         | Listeria_monocytogenes_1639_v121 | 0.9339 |
| Listeria_monocytogenes_1639_v12                          | Listeria_monocytogenes_1639_v121 | 0.9132 |
| Listeria_monocytogenes_1639_v129                         | Listeria_monocytogenes_1639_v121 | 0.9703 |
| Listeria_monocytogenes_1639_v128                         | Listeria_monocytogenes_1639_v121 | 0.9681 |
| Listeria_monocytogenes_1639_v127                         | Listeria_monocytogenes_1639_v121 | 0.9417 |
| Listeria_monocytogenes_1639_v126                         | Listeria_monocytogenes_1639_v121 | 0.9666 |
| Listeria_monocytogenes_1639_v125                         | Listeria_monocytogenes_1639_v121 | 0.9387 |
| Listeria_monocytogenes_1639_v124                         | Listeria_monocytogenes_1639_v121 | 0.9403 |
| Listeria_monocytogenes_1639_v123                         | Listeria_monocytogenes_1639_v121 | 0.9996 |
| Listeria_monocytogenes_1639_v122                         | Listeria_monocytogenes_1639_v121 | 1      |
| Listeria_monocytogenes_1639_v121                         | Listeria_monocytogenes_1639_v121 | 0.0673 |
| Listeria_welshimeri_1643                                 | Listeria_monocytogenes_1639_v122 | 0.8835 |
| Listeria_welshimeri_serovar_6b_str_SLCC5334_386043       | Listeria_monocytogenes_1639_v122 | 0.8829 |
| Listeria_seeligeri_serovar_1_2b_str_SLCC3954_683837      | Listeria_monocytogenes_1639_v122 | 0.8908 |
| Listeria_seeligeri_FSL_S4-171_702452                     | Listeria_monocytogenes_1639_v122 | 0.8311 |
| Listeria_seeligeri_FSL_N1-067_702453                     | Listeria_monocytogenes_1639_v122 | 0.8296 |
| Listeria_seeligeri_1640_v1                               | Listeria_monocytogenes_1639_v122 | 0.8988 |
| Listeria_seeligeri_1640                                  | Listeria_monocytogenes_1639_v122 | 0.8869 |
| Listeria_monocytogenes_WSLC1042_1457188                  | Listeria_monocytogenes_1639_v122 | 0.9721 |
| Listeria_monocytogenes_WSLC1001_1457187                  | Listeria_monocytogenes_1639_v122 | 0.9368 |
| Listeria_monocytogenes_SLCC7179_879090                   | Listeria_monocytogenes_1639_v122 | 0.9424 |
| Listeria_monocytogenes_SLCC5850_882096                   | Listeria_monocytogenes_1639_v122 | 0.9411 |
| Listeria_monocytogenes_SLCC2755_932919                   | Listeria_monocytogenes_1639_v122 | 0.9526 |
| Listeria_monocytogenes_SLCC2540_879089                   | Listeria_monocytogenes_1639_v122 | 0.9516 |
| Listeria_monocytogenes_SLCC2479_882020                   | Listeria_monocytogenes_1639_v122 | 0.9339 |
| Listeria_monocytogenes_SLCC2378_879088                   | Listeria_monocytogenes_1639_v122 | 0.9732 |
| Listeria_monocytogenes_SLCC2376_882097                   | Listeria_monocytogenes_1639_v122 | 0.9462 |
| Listeria_monocytogenes_SLCC2372_932920                   | Listeria_monocytogenes_1639_v122 | 0.9265 |
| Listeria_monocytogenes_serotype_4b_str_LL195_1230340     | Listeria_monocytogenes_1639_v122 | 0.9788 |
| Listeria_monocytogenes_serotype_4b_str_LIS0087_1134669   | Listeria_monocytogenes_1639_v122 | 0.9171 |
| Listeria_monocytogenes_serotype_4b_str_F2365_265669      | Listeria_monocytogenes_1639_v122 | 0.9788 |
| Listeria_monocytogenes_serotype_4b_str_CLIP_80459_568819 | Listeria_monocytogenes_1639_v122 | 0.9807 |
| Listeria_monocytogenes_serotype_4b_str_81-0861_1196161   | Listeria_monocytogenes_1639_v122 | 0.9618 |
| Listeria_monocytogenes_serotype_4b_str_81-0592_1196160   | Listeria_monocytogenes_1639_v122 | 0.9629 |
| Listeria_monocytogenes_serotype_4b_str_81-0558_1196159   | Listeria_monocytogenes_1639_v122 | 0.9621 |
| Listeria_monocytogenes_serotype_4b_str_10-0809_1196162   | Listeria_monocytogenes_1639_v122 | 0.9629 |
| Listeria_monocytogenes_serotype_4b_str_02-6680_1196175   | Listeria_monocytogenes_1639_v122 | 0.9769 |
| Listeria_monocytogenes_serotype_4b_str_02-6679_1196174   | Listeria_monocytogenes_1639_v122 | 0.9769 |
| Listeria_monocytogenes_serotype_4b_str_02-1792_1196173   | Listeria_monocytogenes_1639_v122 | 0.9633 |
| Listeria_monocytogenes_serotype_4b_str_02-1289_1196172   | Listeria_monocytogenes_1639_v122 | 0.9633 |
| Listeria_monocytogenes_serotype_4b_str_02-1103_1196171   | Listeria_monocytogenes_1639_v122 | 0.9633 |
| Listeria_monocytogenes_serotype_3c_str_10-5027_1196195   | Listeria_monocytogenes_1639_v122 | 0.9331 |
| Listeria_monocytogenes_serotype_1_2c_str_10-5026_1196194 | Listeria_monocytogenes_1639_v122 | 0.9342 |
| Listeria_monocytogenes_serotype_1_2c_str_10-5025_1196193 | Listeria_monocytogenes_1639_v122 | 0.9342 |
| Listeria_monocytogenes_serotype_1_2b_str_10-0811_1196164 | Listeria_monocytogenes_1639_v122 | 0.9462 |
| Listeria_monocytogenes_serotype_1_2b_str_10-0810_1196163 | Listeria_monocytogenes_1639_v122 | 0.9462 |
| Listeria_monocytogenes_serotype_1_2a_str_99-6370_1196179 | Listeria_monocytogenes_1639_v122 | 0.9206 |
| Listeria_monocytogenes_serotype_1_2a_str_98-2035_1196178 | Listeria_monocytogenes_1639_v122 | 0.9206 |
| Listeria_monocytogenes_serotype_1_2a_str_95-0093_1196177 | Listeria_monocytogenes_1639_v122 | 0.9261 |
| Listeria_monocytogenes_serotype_1_2a_str_88-0478_1196176 | Listeria_monocytogenes_1639_v122 | 0.9252 |
| Listeria_monocytogenes_serotype_1_2a_str_10-5024_1196192 | Listeria_monocytogenes_1639_v122 | 0.9264 |
| Listeria_monocytogenes_serotype_1_2a_str_10-4758_1196168 | Listeria_monocytogenes_1639_v122 | 0.9423 |
| Listeria_monocytogenes_serotype_1_2a_str_10-4754_1196167 | Listeria_monocytogenes_1639_v122 | 0.942  |
| Listeria_monocytogenes_serotype_1_2a_str_10-1321_1196191 | Listeria_monocytogenes_1639_v122 | 0.9264 |
| Listeria_monocytogenes_serotype_1_2a_str_10-1047_1196190 | Listeria_monocytogenes_1639_v122 | 0.9267 |
| Listeria_monocytogenes_serotype_1_2a_str_10-1046_1196189 | Listeria_monocytogenes_1639_v122 | 0.9267 |
| Listeria_monocytogenes_serotype_1_2a_str_10-0934_1196170 | Listeria_monocytogenes_1639_v122 | 0.9532 |
| Listeria_monocytogenes_serotype_1_2a_str_10-0933_1196169 | Listeria_monocytogenes_1639_v122 | 0.9532 |

|                                                          |                                  |        |
|----------------------------------------------------------|----------------------------------|--------|
| Listeria_monocytogenes_serotype_1_2a_str_10-0815_1196188 | Listeria_monocytogenes_1639_v122 | 0.9219 |
| Listeria_monocytogenes_serotype_1_2a_str_10-0814_1196187 | Listeria_monocytogenes_1639_v122 | 0.9264 |
| Listeria_monocytogenes_serotype_1_2a_str_10-0813_1196166 | Listeria_monocytogenes_1639_v122 | 0.934  |
| Listeria_monocytogenes_serotype_1_2a_str_10-0812_1196165 | Listeria_monocytogenes_1639_v122 | 0.934  |
| Listeria_monocytogenes_serotype_1_2a_str_08-7669_1196186 | Listeria_monocytogenes_1639_v122 | 0.9355 |
| Listeria_monocytogenes_serotype_1_2a_str_08-7374_1196185 | Listeria_monocytogenes_1639_v122 | 0.9264 |
| Listeria_monocytogenes_serotype_1_2a_str_08-6997_1196184 | Listeria_monocytogenes_1639_v122 | 0.9219 |
| Listeria_monocytogenes_serotype_1_2a_str_08-6569_1196183 | Listeria_monocytogenes_1639_v122 | 0.9219 |
| Listeria_monocytogenes_serotype_1_2a_str_08-6056_1196182 | Listeria_monocytogenes_1639_v122 | 0.9219 |
| Listeria_monocytogenes_serotype_1_2a_str_04-5457_1196181 | Listeria_monocytogenes_1639_v122 | 0.9264 |
| Listeria_monocytogenes_serotype_1_2a_str_02-5993_1196180 | Listeria_monocytogenes_1639_v122 | 0.9261 |
| Listeria_monocytogenes_R479a_1437838                     | Listeria_monocytogenes_1639_v122 | 0.9257 |
| Listeria_monocytogenes_N53-1_1234142                     | Listeria_monocytogenes_1639_v122 | 0.8972 |
| Listeria_monocytogenes_M7_1030009                        | Listeria_monocytogenes_1639_v122 | 0.9093 |
| Listeria_monocytogenes_LO28_393132                       | Listeria_monocytogenes_1639_v122 | 0.9325 |
| Listeria_monocytogenes_L99_563174                        | Listeria_monocytogenes_1639_v122 | 0.91   |
| Listeria_monocytogenes_L312_882094                       | Listeria_monocytogenes_1639_v122 | 0.9811 |
| Listeria_monocytogenes_J1816_930781                      | Listeria_monocytogenes_1639_v122 | 0.9619 |
| Listeria_monocytogenes_J1-220_930782                     | Listeria_monocytogenes_1639_v122 | 0.9523 |
| Listeria_monocytogenes_J0161_393130                      | Listeria_monocytogenes_1639_v122 | 0.9317 |
| Listeria_monocytogenes_HCC23_552536                      | Listeria_monocytogenes_1639_v122 | 0.9093 |
| Listeria_monocytogenes_FSL_R2-561_393126                 | Listeria_monocytogenes_1639_v122 | 0.9324 |
| Listeria_monocytogenes_FSL_J1-208_393119                 | Listeria_monocytogenes_1639_v122 | 0.9212 |
| Listeria_monocytogenes_FSL_J1-175_393118                 | Listeria_monocytogenes_1639_v122 | 0.9614 |
| Listeria_monocytogenes_Finland_1998_393127               | Listeria_monocytogenes_1639_v122 | 0.9536 |
| Listeria_monocytogenes_EGD-e_169963_v1                   | Listeria_monocytogenes_1639_v122 | 0.9421 |
| Listeria_monocytogenes_EGD-e_169963                      | Listeria_monocytogenes_1639_v122 | 0.9424 |
| Listeria_monocytogenes_EGD_1334565                       | Listeria_monocytogenes_1639_v122 | 0.9419 |
| Listeria_monocytogenes_CFSAN002349_1299895               | Listeria_monocytogenes_1639_v122 | 0.9996 |
| Listeria_monocytogenes_ATCC_19117_882095_v1              | Listeria_monocytogenes_1639_v122 | 0.9728 |
| Listeria_monocytogenes_ATCC_19117_882095                 | Listeria_monocytogenes_1639_v122 | 0.9727 |
| Listeria_monocytogenes_6179_1288295                      | Listeria_monocytogenes_1639_v122 | 0.9155 |
| Listeria_monocytogenes_1639_v9                           | Listeria_monocytogenes_1639_v122 | 0.9317 |
| Listeria_monocytogenes_1639_v99                          | Listeria_monocytogenes_1639_v122 | 0.9634 |
| Listeria_monocytogenes_1639_v98                          | Listeria_monocytogenes_1639_v122 | 0.9289 |
| Listeria_monocytogenes_1639_v97                          | Listeria_monocytogenes_1639_v122 | 0.9688 |
| Listeria_monocytogenes_1639_v96                          | Listeria_monocytogenes_1639_v122 | 0.9627 |
| Listeria_monocytogenes_1639_v95                          | Listeria_monocytogenes_1639_v122 | 0.9627 |
| Listeria_monocytogenes_1639_v94                          | Listeria_monocytogenes_1639_v122 | 0.9627 |
| Listeria_monocytogenes_1639_v93                          | Listeria_monocytogenes_1639_v122 | 0.9294 |
| Listeria_monocytogenes_1639_v92                          | Listeria_monocytogenes_1639_v122 | 0.9631 |
| Listeria_monocytogenes_1639_v91                          | Listeria_monocytogenes_1639_v122 | 0.9585 |
| Listeria_monocytogenes_1639_v90                          | Listeria_monocytogenes_1639_v122 | 0.9289 |
| Listeria_monocytogenes_1639_v8                           | Listeria_monocytogenes_1639_v122 | 0.9154 |
| Listeria_monocytogenes_1639_v89                          | Listeria_monocytogenes_1639_v122 | 0.9706 |
| Listeria_monocytogenes_1639_v88                          | Listeria_monocytogenes_1639_v122 | 0.9341 |
| Listeria_monocytogenes_1639_v87                          | Listeria_monocytogenes_1639_v122 | 0.9298 |
| Listeria_monocytogenes_1639_v86                          | Listeria_monocytogenes_1639_v122 | 0.9291 |
| Listeria_monocytogenes_1639_v85                          | Listeria_monocytogenes_1639_v122 | 0.9611 |
| Listeria_monocytogenes_1639_v84                          | Listeria_monocytogenes_1639_v122 | 0.9369 |
| Listeria_monocytogenes_1639_v83                          | Listeria_monocytogenes_1639_v122 | 0.9613 |
| Listeria_monocytogenes_1639_v82                          | Listeria_monocytogenes_1639_v122 | 0.9606 |
| Listeria_monocytogenes_1639_v81                          | Listeria_monocytogenes_1639_v122 | 0.934  |
| Listeria_monocytogenes_1639_v80                          | Listeria_monocytogenes_1639_v122 | 0.9533 |
| Listeria_monocytogenes_1639_v7                           | Listeria_monocytogenes_1639_v122 | 0.9154 |
| Listeria_monocytogenes_1639_v79                          | Listeria_monocytogenes_1639_v122 | 0.9319 |
| Listeria_monocytogenes_1639_v78                          | Listeria_monocytogenes_1639_v122 | 0.9333 |
| Listeria_monocytogenes_1639_v77                          | Listeria_monocytogenes_1639_v122 | 0.9331 |
| Listeria_monocytogenes_1639_v76                          | Listeria_monocytogenes_1639_v122 | 0.9259 |
| Listeria_monocytogenes_1639_v75                          | Listeria_monocytogenes_1639_v122 | 0.91   |
| Listeria_monocytogenes_1639_v74                          | Listeria_monocytogenes_1639_v122 | 0.9287 |
| Listeria_monocytogenes_1639_v73                          | Listeria_monocytogenes_1639_v122 | 0.9276 |
| Listeria_monocytogenes_1639_v72                          | Listeria_monocytogenes_1639_v122 | 0.9601 |
| Listeria_monocytogenes_1639_v71                          | Listeria_monocytogenes_1639_v122 | 0.9172 |
| Listeria_monocytogenes_1639_v70                          | Listeria_monocytogenes_1639_v122 | 0.9303 |
| Listeria_monocytogenes_1639_v6                           | Listeria_monocytogenes_1639_v122 | 0.9148 |
| Listeria_monocytogenes_1639_v69                          | Listeria_monocytogenes_1639_v122 | 0.9633 |
| Listeria_monocytogenes_1639_v68                          | Listeria_monocytogenes_1639_v122 | 0.9359 |
| Listeria_monocytogenes_1639_v67                          | Listeria_monocytogenes_1639_v122 | 0.9515 |
| Listeria_monocytogenes_1639_v66                          | Listeria_monocytogenes_1639_v122 | 0.9375 |
| Listeria_monocytogenes_1639_v65                          | Listeria_monocytogenes_1639_v122 | 0.9296 |
| Listeria_monocytogenes_1639_v64                          | Listeria_monocytogenes_1639_v122 | 0.93   |
| Listeria_monocytogenes_1639_v63                          | Listeria_monocytogenes_1639_v122 | 0.9472 |
| Listeria_monocytogenes_1639_v62                          | Listeria_monocytogenes_1639_v122 | 0.9298 |
| Listeria_monocytogenes_1639_v61                          | Listeria_monocytogenes_1639_v122 | 0.9292 |
| Listeria_monocytogenes_1639_v60                          | Listeria_monocytogenes_1639_v122 | 0.9336 |
| Listeria_monocytogenes_1639_v5                           | Listeria_monocytogenes_1639_v122 | 0.913  |
| Listeria_monocytogenes_1639_v59                          | Listeria_monocytogenes_1639_v122 | 0.962  |
| Listeria_monocytogenes_1639_v58                          | Listeria_monocytogenes_1639_v122 | 0.9655 |
| Listeria_monocytogenes_1639_v57                          | Listeria_monocytogenes_1639_v122 | 0.9595 |
| Listeria_monocytogenes_1639_v56                          | Listeria_monocytogenes_1639_v122 | 0.9617 |
| Listeria_monocytogenes_1639_v55                          | Listeria_monocytogenes_1639_v122 | 0.9551 |
| Listeria_monocytogenes_1639_v54                          | Listeria_monocytogenes_1639_v122 | 0.9286 |
| Listeria_monocytogenes_1639_v53                          | Listeria_monocytogenes_1639_v122 | 0.9333 |
| Listeria_monocytogenes_1639_v52                          | Listeria_monocytogenes_1639_v122 | 0.958  |
| Listeria_monocytogenes_1639_v51                          | Listeria_monocytogenes_1639_v122 | 0.9559 |
| Listeria_monocytogenes_1639_v50                          | Listeria_monocytogenes_1639_v122 | 0.9256 |
| Listeria_monocytogenes_1639_v4                           | Listeria_monocytogenes_1639_v122 | 0.9257 |
| Listeria_monocytogenes_1639_v49                          | Listeria_monocytogenes_1639_v122 | 0.961  |
| Listeria_monocytogenes_1639_v48                          | Listeria_monocytogenes_1639_v122 | 0.9282 |
| Listeria_monocytogenes_1639_v47                          | Listeria_monocytogenes_1639_v122 | 0.9261 |

[illegible]



|                                                          |                                  |        |
|----------------------------------------------------------|----------------------------------|--------|
| Listeria_monocytogenes_1639_v143                         | Listeria_monocytogenes_1639_v122 | 0.9518 |
| Listeria_monocytogenes_1639_v142                         | Listeria_monocytogenes_1639_v122 | 0.9807 |
| Listeria_monocytogenes_1639_v141                         | Listeria_monocytogenes_1639_v122 | 0.9726 |
| Listeria_monocytogenes_1639_v140                         | Listeria_monocytogenes_1639_v122 | 0.9811 |
| Listeria_monocytogenes_1639_v13                          | Listeria_monocytogenes_1639_v122 | 0.9322 |
| Listeria_monocytogenes_1639_v139                         | Listeria_monocytogenes_1639_v122 | 0.98   |
| Listeria_monocytogenes_1639_v138                         | Listeria_monocytogenes_1639_v122 | 0.983  |
| Listeria_monocytogenes_1639_v137                         | Listeria_monocytogenes_1639_v122 | 0.9827 |
| Listeria_monocytogenes_1639_v136                         | Listeria_monocytogenes_1639_v122 | 0.9416 |
| Listeria_monocytogenes_1639_v135                         | Listeria_monocytogenes_1639_v122 | 0.9213 |
| Listeria_monocytogenes_1639_v134                         | Listeria_monocytogenes_1639_v122 | 0.9731 |
| Listeria_monocytogenes_1639_v133                         | Listeria_monocytogenes_1639_v122 | 0.9387 |
| Listeria_monocytogenes_1639_v132                         | Listeria_monocytogenes_1639_v122 | 0.9221 |
| Listeria_monocytogenes_1639_v131                         | Listeria_monocytogenes_1639_v122 | 0.9707 |
| Listeria_monocytogenes_1639_v130                         | Listeria_monocytogenes_1639_v122 | 0.9339 |
| Listeria_monocytogenes_1639_v12                          | Listeria_monocytogenes_1639_v122 | 0.9132 |
| Listeria_monocytogenes_1639_v129                         | Listeria_monocytogenes_1639_v122 | 0.9703 |
| Listeria_monocytogenes_1639_v128                         | Listeria_monocytogenes_1639_v122 | 0.9681 |
| Listeria_monocytogenes_1639_v127                         | Listeria_monocytogenes_1639_v122 | 0.9417 |
| Listeria_monocytogenes_1639_v126                         | Listeria_monocytogenes_1639_v122 | 0.9666 |
| Listeria_monocytogenes_1639_v125                         | Listeria_monocytogenes_1639_v122 | 0.9387 |
| Listeria_monocytogenes_1639_v124                         | Listeria_monocytogenes_1639_v122 | 0.9403 |
| Listeria_monocytogenes_1639_v123                         | Listeria_monocytogenes_1639_v122 | 0.9996 |
| Listeria_monocytogenes_1639_v122                         | Listeria_monocytogenes_1639_v122 | 0.0673 |
| Listeria_welshimeri_1643                                 | Listeria_monocytogenes_1639_v123 | 0.8832 |
| Listeria_welshimeri_serovar_6b_str_SLCC5334_386043       | Listeria_monocytogenes_1639_v123 | 0.8829 |
| Listeria_seeligeri_serovar_1_2b_str_SLCC3954_683837      | Listeria_monocytogenes_1639_v123 | 0.8908 |
| Listeria_seeligeri_FSL_S4-171_702452                     | Listeria_monocytogenes_1639_v123 | 0.8308 |
| Listeria_seeligeri_FSL_N1-067_702453                     | Listeria_monocytogenes_1639_v123 | 0.8296 |
| Listeria_seeligeri_1640_v1                               | Listeria_monocytogenes_1639_v123 | 0.8992 |
| Listeria_seeligeri_1640                                  | Listeria_monocytogenes_1639_v123 | 0.8869 |
| Listeria_monocytogenes_WSLC1042_1457188                  | Listeria_monocytogenes_1639_v123 | 0.9721 |
| Listeria_monocytogenes_WSLC1001_1457187                  | Listeria_monocytogenes_1639_v123 | 0.9368 |
| Listeria_monocytogenes_SLCC7179_879090                   | Listeria_monocytogenes_1639_v123 | 0.9424 |
| Listeria_monocytogenes_SLCC5850_882096                   | Listeria_monocytogenes_1639_v123 | 0.9411 |
| Listeria_monocytogenes_SLCC2755_932919                   | Listeria_monocytogenes_1639_v123 | 0.9522 |
| Listeria_monocytogenes_SLCC2540_879089                   | Listeria_monocytogenes_1639_v123 | 0.9513 |
| Listeria_monocytogenes_SLCC2479_882020                   | Listeria_monocytogenes_1639_v123 | 0.9342 |
| Listeria_monocytogenes_SLCC2378_879088                   | Listeria_monocytogenes_1639_v123 | 0.9728 |
| Listeria_monocytogenes_SLCC2376_882097                   | Listeria_monocytogenes_1639_v123 | 0.9462 |
| Listeria_monocytogenes_SLCC2372_932920                   | Listeria_monocytogenes_1639_v123 | 0.9269 |
| Listeria_monocytogenes_serotype_4b_str_LL195_1230340     | Listeria_monocytogenes_1639_v123 | 0.9784 |
| Listeria_monocytogenes_serotype_4b_str_LIS0087_1134669   | Listeria_monocytogenes_1639_v123 | 0.9174 |
| Listeria_monocytogenes_serotype_4b_str_F2365_265669      | Listeria_monocytogenes_1639_v123 | 0.9784 |
| Listeria_monocytogenes_serotype_4b_str_CLIP_80459_568819 | Listeria_monocytogenes_1639_v123 | 0.9803 |
| Listeria_monocytogenes_serotype_4b_str_81-0861_1196161   | Listeria_monocytogenes_1639_v123 | 0.9618 |
| Listeria_monocytogenes_serotype_4b_str_81-0592_1196160   | Listeria_monocytogenes_1639_v123 | 0.9629 |
| Listeria_monocytogenes_serotype_4b_str_81-0558_1196159   | Listeria_monocytogenes_1639_v123 | 0.9617 |
| Listeria_monocytogenes_serotype_4b_str_10-0809_1196162   | Listeria_monocytogenes_1639_v123 | 0.9629 |
| Listeria_monocytogenes_serotype_4b_str_02-6680_1196175   | Listeria_monocytogenes_1639_v123 | 0.9769 |
| Listeria_monocytogenes_serotype_4b_str_02-6679_1196174   | Listeria_monocytogenes_1639_v123 | 0.9769 |
| Listeria_monocytogenes_serotype_4b_str_02-1792_1196173   | Listeria_monocytogenes_1639_v123 | 0.9629 |
| Listeria_monocytogenes_serotype_4b_str_02-1289_1196172   | Listeria_monocytogenes_1639_v123 | 0.9629 |
| Listeria_monocytogenes_serotype_4b_str_02-1103_1196171   | Listeria_monocytogenes_1639_v123 | 0.9629 |
| Listeria_monocytogenes_serotype_3c_str_10-5027_1196195   | Listeria_monocytogenes_1639_v123 | 0.9335 |
| Listeria_monocytogenes_serotype_1_2c_str_10-5026_1196194 | Listeria_monocytogenes_1639_v123 | 0.9342 |
| Listeria_monocytogenes_serotype_1_2c_str_10-5025_1196193 | Listeria_monocytogenes_1639_v123 | 0.9342 |
| Listeria_monocytogenes_serotype_1_2b_str_10-0811_1196164 | Listeria_monocytogenes_1639_v123 | 0.9462 |
| Listeria_monocytogenes_serotype_1_2b_str_10-0810_1196163 | Listeria_monocytogenes_1639_v123 | 0.9462 |
| Listeria_monocytogenes_serotype_1_2a_str_99-6370_1196179 | Listeria_monocytogenes_1639_v123 | 0.9209 |
| Listeria_monocytogenes_serotype_1_2a_str_98-2035_1196178 | Listeria_monocytogenes_1639_v123 | 0.9209 |
| Listeria_monocytogenes_serotype_1_2a_str_95-0093_1196177 | Listeria_monocytogenes_1639_v123 | 0.9264 |
| Listeria_monocytogenes_serotype_1_2a_str_88-0478_1196176 | Listeria_monocytogenes_1639_v123 | 0.9253 |
| Listeria_monocytogenes_serotype_1_2a_str_10-5024_1196192 | Listeria_monocytogenes_1639_v123 | 0.9264 |
| Listeria_monocytogenes_serotype_1_2a_str_10-4758_1196168 | Listeria_monocytogenes_1639_v123 | 0.9424 |
| Listeria_monocytogenes_serotype_1_2a_str_10-4754_1196167 | Listeria_monocytogenes_1639_v123 | 0.9423 |
| Listeria_monocytogenes_serotype_1_2a_str_10-1321_1196191 | Listeria_monocytogenes_1639_v123 | 0.9264 |
| Listeria_monocytogenes_serotype_1_2a_str_10-1047_1196190 | Listeria_monocytogenes_1639_v123 | 0.9271 |
| Listeria_monocytogenes_serotype_1_2a_str_10-1046_1196189 | Listeria_monocytogenes_1639_v123 | 0.9271 |
| Listeria_monocytogenes_serotype_1_2a_str_10-0934_1196170 | Listeria_monocytogenes_1639_v123 | 0.9536 |
| Listeria_monocytogenes_serotype_1_2a_str_10-0933_1196169 | Listeria_monocytogenes_1639_v123 | 0.9536 |
| Listeria_monocytogenes_serotype_1_2a_str_10-0815_1196188 | Listeria_monocytogenes_1639_v123 | 0.9223 |
| Listeria_monocytogenes_serotype_1_2a_str_10-0814_1196187 | Listeria_monocytogenes_1639_v123 | 0.9268 |
| Listeria_monocytogenes_serotype_1_2a_str_10-0813_1196166 | Listeria_monocytogenes_1639_v123 | 0.9344 |
| Listeria_monocytogenes_serotype_1_2a_str_10-0812_1196165 | Listeria_monocytogenes_1639_v123 | 0.9344 |
| Listeria_monocytogenes_serotype_1_2a_str_08-7669_1196186 | Listeria_monocytogenes_1639_v123 | 0.9359 |
| Listeria_monocytogenes_serotype_1_2a_str_08-7374_1196185 | Listeria_monocytogenes_1639_v123 | 0.9264 |
| Listeria_monocytogenes_serotype_1_2a_str_08-6997_1196184 | Listeria_monocytogenes_1639_v123 | 0.9223 |
| Listeria_monocytogenes_serotype_1_2a_str_08-6569_1196183 | Listeria_monocytogenes_1639_v123 | 0.9223 |
| Listeria_monocytogenes_serotype_1_2a_str_08-6056_1196182 | Listeria_monocytogenes_1639_v123 | 0.9223 |
| Listeria_monocytogenes_serotype_1_2a_str_04-5457_1196181 | Listeria_monocytogenes_1639_v123 | 0.9264 |
| Listeria_monocytogenes_serotype_1_2a_str_02-5993_1196180 | Listeria_monocytogenes_1639_v123 | 0.9264 |
| Listeria_monocytogenes_R479a_1437838                     | Listeria_monocytogenes_1639_v123 | 0.9261 |
| Listeria_monocytogenes_N53-1_1234142                     | Listeria_monocytogenes_1639_v123 | 0.8976 |
| Listeria_monocytogenes_M7_1030009                        | Listeria_monocytogenes_1639_v123 | 0.9093 |
| Listeria_monocytogenes_LO28_393132                       | Listeria_monocytogenes_1639_v123 | 0.9328 |
| Listeria_monocytogenes_L99_563174                        | Listeria_monocytogenes_1639_v123 | 0.9096 |
| Listeria_monocytogenes_L312_882094                       | Listeria_monocytogenes_1639_v123 | 0.9807 |
| Listeria_monocytogenes_J1816_930781                      | Listeria_monocytogenes_1639_v123 | 0.9619 |
| Listeria_monocytogenes_J1-220_930782                     | Listeria_monocytogenes_1639_v123 | 0.9523 |
| Listeria_monocytogenes_J0161_393130                      | Listeria_monocytogenes_1639_v123 | 0.9317 |

[illegible]

[illegible]

|                                                          |                                  |        |
|----------------------------------------------------------|----------------------------------|--------|
| Listeria_monocytogenes_1639_v125                         | Listeria_monocytogenes_1639_v123 | 0.9387 |
| Listeria_monocytogenes_1639_v124                         | Listeria_monocytogenes_1639_v123 | 0.9399 |
| Listeria_monocytogenes_1639_v123                         | Listeria_monocytogenes_1639_v123 | 0.0676 |
| Listeria_welshimeri_1643                                 | Listeria_monocytogenes_1639_v124 | 0.8829 |
| Listeria_welshimeri_serovar_6b_str_SLCC5334_386043       | Listeria_monocytogenes_1639_v124 | 0.8822 |
| Listeria_seeligeri_serovar_1_2b_str_SLCC3954_683837      | Listeria_monocytogenes_1639_v124 | 0.8813 |
| Listeria_seeligeri_FSL_S4-171_702452                     | Listeria_monocytogenes_1639_v124 | 0.822  |
| Listeria_seeligeri_FSL_N1-067_702453                     | Listeria_monocytogenes_1639_v124 | 0.8239 |
| Listeria_seeligeri_1640_v1                               | Listeria_monocytogenes_1639_v124 | 0.8859 |
| Listeria_seeligeri_1640                                  | Listeria_monocytogenes_1639_v124 | 0.8771 |
| Listeria_monocytogenes_WSLC1042_1457188                  | Listeria_monocytogenes_1639_v124 | 0.9433 |
| Listeria_monocytogenes_WSLC1001_1457187                  | Listeria_monocytogenes_1639_v124 | 0.9231 |
| Listeria_monocytogenes_SLCC7179_879090                   | Listeria_monocytogenes_1639_v124 | 0.9262 |
| Listeria_monocytogenes_SLCC5850_882096                   | Listeria_monocytogenes_1639_v124 | 0.9273 |
| Listeria_monocytogenes_SLCC2755_932919                   | Listeria_monocytogenes_1639_v124 | 0.9264 |
| Listeria_monocytogenes_SLCC2540_879089                   | Listeria_monocytogenes_1639_v124 | 0.9287 |
| Listeria_monocytogenes_SLCC2479_882020                   | Listeria_monocytogenes_1639_v124 | 0.9142 |
| Listeria_monocytogenes_SLCC2378_879088                   | Listeria_monocytogenes_1639_v124 | 0.9448 |
| Listeria_monocytogenes_SLCC2376_882097                   | Listeria_monocytogenes_1639_v124 | 0.9523 |
| Listeria_monocytogenes_SLCC2372_932920                   | Listeria_monocytogenes_1639_v124 | 0.9067 |
| Listeria_monocytogenes_serotype_4b_str_LL195_1230340     | Listeria_monocytogenes_1639_v124 | 0.9471 |
| Listeria_monocytogenes_serotype_4b_str_LIS0087_1134669   | Listeria_monocytogenes_1639_v124 | 0.9036 |
| Listeria_monocytogenes_serotype_4b_str_F2365_265669      | Listeria_monocytogenes_1639_v124 | 0.9471 |
| Listeria_monocytogenes_serotype_4b_str_CLIP_80459_568819 | Listeria_monocytogenes_1639_v124 | 0.9424 |
| Listeria_monocytogenes_serotype_4b_str_81-0861_1196161   | Listeria_monocytogenes_1639_v124 | 0.9337 |
| Listeria_monocytogenes_serotype_4b_str_81-0592_1196160   | Listeria_monocytogenes_1639_v124 | 0.9348 |
| Listeria_monocytogenes_serotype_4b_str_81-0558_1196159   | Listeria_monocytogenes_1639_v124 | 0.9355 |
| Listeria_monocytogenes_serotype_4b_str_10-0809_1196162   | Listeria_monocytogenes_1639_v124 | 0.9348 |
| Listeria_monocytogenes_serotype_4b_str_02-6680_1196175   | Listeria_monocytogenes_1639_v124 | 0.9418 |
| Listeria_monocytogenes_serotype_4b_str_02-6679_1196174   | Listeria_monocytogenes_1639_v124 | 0.9418 |
| Listeria_monocytogenes_serotype_4b_str_02-1792_1196173   | Listeria_monocytogenes_1639_v124 | 0.9348 |
| Listeria_monocytogenes_serotype_4b_str_02-1289_1196172   | Listeria_monocytogenes_1639_v124 | 0.9348 |
| Listeria_monocytogenes_serotype_4b_str_02-1103_1196171   | Listeria_monocytogenes_1639_v124 | 0.9348 |
| Listeria_monocytogenes_serotype_3c_str_10-5027_1196195   | Listeria_monocytogenes_1639_v124 | 0.9131 |
| Listeria_monocytogenes_serotype_1_2c_str_10-5026_1196194 | Listeria_monocytogenes_1639_v124 | 0.9142 |
| Listeria_monocytogenes_serotype_1_2c_str_10-5025_1196193 | Listeria_monocytogenes_1639_v124 | 0.9142 |
| Listeria_monocytogenes_serotype_1_2b_str_10-0811_1196164 | Listeria_monocytogenes_1639_v124 | 0.9168 |
| Listeria_monocytogenes_serotype_1_2b_str_10-0810_1196163 | Listeria_monocytogenes_1639_v124 | 0.9168 |
| Listeria_monocytogenes_serotype_1_2a_str_99-6370_1196179 | Listeria_monocytogenes_1639_v124 | 0.8997 |
| Listeria_monocytogenes_serotype_1_2a_str_98-2035_1196178 | Listeria_monocytogenes_1639_v124 | 0.8997 |
| Listeria_monocytogenes_serotype_1_2a_str_95-0093_1196177 | Listeria_monocytogenes_1639_v124 | 0.9055 |
| Listeria_monocytogenes_serotype_1_2a_str_88-0478_1196176 | Listeria_monocytogenes_1639_v124 | 0.9046 |
| Listeria_monocytogenes_serotype_1_2a_str_10-5024_1196192 | Listeria_monocytogenes_1639_v124 | 0.9058 |
| Listeria_monocytogenes_serotype_1_2a_str_10-4758_1196168 | Listeria_monocytogenes_1639_v124 | 0.9236 |
| Listeria_monocytogenes_serotype_1_2a_str_10-4754_1196167 | Listeria_monocytogenes_1639_v124 | 0.9236 |
| Listeria_monocytogenes_serotype_1_2a_str_10-1321_1196191 | Listeria_monocytogenes_1639_v124 | 0.9058 |
| Listeria_monocytogenes_serotype_1_2a_str_10-1047_1196190 | Listeria_monocytogenes_1639_v124 | 0.9061 |
| Listeria_monocytogenes_serotype_1_2a_str_10-1046_1196189 | Listeria_monocytogenes_1639_v124 | 0.9061 |
| Listeria_monocytogenes_serotype_1_2a_str_10-0934_1196170 | Listeria_monocytogenes_1639_v124 | 0.9353 |
| Listeria_monocytogenes_serotype_1_2a_str_10-0933_1196169 | Listeria_monocytogenes_1639_v124 | 0.9353 |
| Listeria_monocytogenes_serotype_1_2a_str_10-0815_1196188 | Listeria_monocytogenes_1639_v124 | 0.9011 |
| Listeria_monocytogenes_serotype_1_2a_str_10-0814_1196187 | Listeria_monocytogenes_1639_v124 | 0.9055 |
| Listeria_monocytogenes_serotype_1_2a_str_10-0813_1196166 | Listeria_monocytogenes_1639_v124 | 0.9199 |
| Listeria_monocytogenes_serotype_1_2a_str_10-0812_1196165 | Listeria_monocytogenes_1639_v124 | 0.9199 |
| Listeria_monocytogenes_serotype_1_2a_str_08-7669_1196186 | Listeria_monocytogenes_1639_v124 | 0.915  |
| Listeria_monocytogenes_serotype_1_2a_str_08-7374_1196185 | Listeria_monocytogenes_1639_v124 | 0.9058 |
| Listeria_monocytogenes_serotype_1_2a_str_08-6997_1196184 | Listeria_monocytogenes_1639_v124 | 0.9011 |
| Listeria_monocytogenes_serotype_1_2a_str_08-6569_1196183 | Listeria_monocytogenes_1639_v124 | 0.9011 |
| Listeria_monocytogenes_serotype_1_2a_str_08-6056_1196182 | Listeria_monocytogenes_1639_v124 | 0.9011 |
| Listeria_monocytogenes_serotype_1_2a_str_04-5457_1196181 | Listeria_monocytogenes_1639_v124 | 0.9058 |
| Listeria_monocytogenes_serotype_1_2a_str_02-5993_1196180 | Listeria_monocytogenes_1639_v124 | 0.9055 |
| Listeria_monocytogenes_R479a_1437838                     | Listeria_monocytogenes_1639_v124 | 0.9044 |
| Listeria_monocytogenes_N53-1_1234142                     | Listeria_monocytogenes_1639_v124 | 0.8808 |
| Listeria_monocytogenes_M7_1030009                        | Listeria_monocytogenes_1639_v124 | 0.9168 |
| Listeria_monocytogenes_LO28_393132                       | Listeria_monocytogenes_1639_v124 | 0.9128 |
| Listeria_monocytogenes_L99_563174                        | Listeria_monocytogenes_1639_v124 | 0.9175 |
| Listeria_monocytogenes_L312_882094                       | Listeria_monocytogenes_1639_v124 | 0.9424 |
| Listeria_monocytogenes_J1816_930781                      | Listeria_monocytogenes_1639_v124 | 0.9219 |
| Listeria_monocytogenes_J1-220_930782                     | Listeria_monocytogenes_1639_v124 | 0.9248 |
| Listeria_monocytogenes_J0161_393130                      | Listeria_monocytogenes_1639_v124 | 0.9188 |
| Listeria_monocytogenes_HCC23_552536                      | Listeria_monocytogenes_1639_v124 | 0.9171 |
| Listeria_monocytogenes_FSL_R2-561_393126                 | Listeria_monocytogenes_1639_v124 | 0.9124 |
| Listeria_monocytogenes_FSL_J1-208_393119                 | Listeria_monocytogenes_1639_v124 | 0.9292 |
| Listeria_monocytogenes_FSL_J1-175_393118                 | Listeria_monocytogenes_1639_v124 | 0.9342 |
| Listeria_monocytogenes_Finland_1998_393127               | Listeria_monocytogenes_1639_v124 | 0.9318 |
| Listeria_monocytogenes_EGD-e_169963_v1                   | Listeria_monocytogenes_1639_v124 | 0.9275 |
| Listeria_monocytogenes_EGD-e_169963                      | Listeria_monocytogenes_1639_v124 | 0.9275 |
| Listeria_monocytogenes_EGD_1334565                       | Listeria_monocytogenes_1639_v124 | 0.928  |
| Listeria_monocytogenes_CFSAN002349_1299895               | Listeria_monocytogenes_1639_v124 | 0.9399 |
| Listeria_monocytogenes_ATCC_19117_882095_v1              | Listeria_monocytogenes_1639_v124 | 0.9442 |
| Listeria_monocytogenes_ATCC_19117_882095                 | Listeria_monocytogenes_1639_v124 | 0.9442 |
| Listeria_monocytogenes_6179_1288295                      | Listeria_monocytogenes_1639_v124 | 0.9033 |
| Listeria_monocytogenes_1639_v9                           | Listeria_monocytogenes_1639_v124 | 0.9062 |
| Listeria_monocytogenes_1639_v99                          | Listeria_monocytogenes_1639_v124 | 0.9227 |
| Listeria_monocytogenes_1639_v98                          | Listeria_monocytogenes_1639_v124 | 0.9142 |
| Listeria_monocytogenes_1639_v97                          | Listeria_monocytogenes_1639_v124 | 0.9315 |
| Listeria_monocytogenes_1639_v96                          | Listeria_monocytogenes_1639_v124 | 0.9216 |
| Listeria_monocytogenes_1639_v95                          | Listeria_monocytogenes_1639_v124 | 0.9216 |
| Listeria_monocytogenes_1639_v94                          | Listeria_monocytogenes_1639_v124 | 0.922  |
| Listeria_monocytogenes_1639_v93                          | Listeria_monocytogenes_1639_v124 | 0.9106 |
| Listeria_monocytogenes_1639_v92                          | Listeria_monocytogenes_1639_v124 | 0.9223 |

[illegible]

[illegible]



|                                                          |                                  |        |
|----------------------------------------------------------|----------------------------------|--------|
| Listeria_monocytogenes_serotype_4b_str_F2365_265669      | Listeria_monocytogenes_1639_v125 | 0.9363 |
| Listeria_monocytogenes_serotype_4b_str_CLIP_80459_568819 | Listeria_monocytogenes_1639_v125 | 0.9408 |
| Listeria_monocytogenes_serotype_4b_str_81-0861_1196161   | Listeria_monocytogenes_1639_v125 | 0.9242 |
| Listeria_monocytogenes_serotype_4b_str_81-0592_1196160   | Listeria_monocytogenes_1639_v125 | 0.9253 |
| Listeria_monocytogenes_serotype_4b_str_81-0558_1196159   | Listeria_monocytogenes_1639_v125 | 0.926  |
| Listeria_monocytogenes_serotype_4b_str_10-0809_1196162   | Listeria_monocytogenes_1639_v125 | 0.9253 |
| Listeria_monocytogenes_serotype_4b_str_02-6680_1196175   | Listeria_monocytogenes_1639_v125 | 0.9394 |
| Listeria_monocytogenes_serotype_4b_str_02-6679_1196174   | Listeria_monocytogenes_1639_v125 | 0.9394 |
| Listeria_monocytogenes_serotype_4b_str_02-1792_1196173   | Listeria_monocytogenes_1639_v125 | 0.9275 |
| Listeria_monocytogenes_serotype_4b_str_02-1289_1196172   | Listeria_monocytogenes_1639_v125 | 0.9275 |
| Listeria_monocytogenes_serotype_4b_str_02-1103_1196171   | Listeria_monocytogenes_1639_v125 | 0.9275 |
| Listeria_monocytogenes_serotype_3c_str_10-5027_1196195   | Listeria_monocytogenes_1639_v125 | 0.9469 |
| Listeria_monocytogenes_serotype_1_2c_str_10-5026_1196194 | Listeria_monocytogenes_1639_v125 | 0.948  |
| Listeria_monocytogenes_serotype_1_2c_str_10-5025_1196193 | Listeria_monocytogenes_1639_v125 | 0.948  |
| Listeria_monocytogenes_serotype_1_2b_str_10-0811_1196164 | Listeria_monocytogenes_1639_v125 | 0.9265 |
| Listeria_monocytogenes_serotype_1_2b_str_10-0810_1196163 | Listeria_monocytogenes_1639_v125 | 0.9265 |
| Listeria_monocytogenes_serotype_1_2a_str_99-6370_1196179 | Listeria_monocytogenes_1639_v125 | 0.9398 |
| Listeria_monocytogenes_serotype_1_2a_str_98-2035_1196178 | Listeria_monocytogenes_1639_v125 | 0.9398 |
| Listeria_monocytogenes_serotype_1_2a_str_95-0093_1196177 | Listeria_monocytogenes_1639_v125 | 0.9458 |
| Listeria_monocytogenes_serotype_1_2a_str_88-0478_1196176 | Listeria_monocytogenes_1639_v125 | 0.9454 |
| Listeria_monocytogenes_serotype_1_2a_str_10-5024_1196192 | Listeria_monocytogenes_1639_v125 | 0.9461 |
| Listeria_monocytogenes_serotype_1_2a_str_10-4758_1196168 | Listeria_monocytogenes_1639_v125 | 0.9513 |
| Listeria_monocytogenes_serotype_1_2a_str_10-4754_1196167 | Listeria_monocytogenes_1639_v125 | 0.9513 |
| Listeria_monocytogenes_serotype_1_2a_str_10-1321_1196191 | Listeria_monocytogenes_1639_v125 | 0.9461 |
| Listeria_monocytogenes_serotype_1_2a_str_10-1047_1196190 | Listeria_monocytogenes_1639_v125 | 0.9465 |
| Listeria_monocytogenes_serotype_1_2a_str_10-1046_1196189 | Listeria_monocytogenes_1639_v125 | 0.9465 |
| Listeria_monocytogenes_serotype_1_2a_str_10-0934_1196170 | Listeria_monocytogenes_1639_v125 | 0.9645 |
| Listeria_monocytogenes_serotype_1_2a_str_10-0933_1196169 | Listeria_monocytogenes_1639_v125 | 0.9645 |
| Listeria_monocytogenes_serotype_1_2a_str_10-0815_1196188 | Listeria_monocytogenes_1639_v125 | 0.9412 |
| Listeria_monocytogenes_serotype_1_2a_str_10-0814_1196187 | Listeria_monocytogenes_1639_v125 | 0.9458 |
| Listeria_monocytogenes_serotype_1_2a_str_10-0813_1196166 | Listeria_monocytogenes_1639_v125 | 0.9512 |
| Listeria_monocytogenes_serotype_1_2a_str_10-0812_1196165 | Listeria_monocytogenes_1639_v125 | 0.9512 |
| Listeria_monocytogenes_serotype_1_2a_str_08-7669_1196186 | Listeria_monocytogenes_1639_v125 | 0.9554 |
| Listeria_monocytogenes_serotype_1_2a_str_08-7374_1196185 | Listeria_monocytogenes_1639_v125 | 0.9461 |
| Listeria_monocytogenes_serotype_1_2a_str_08-6997_1196184 | Listeria_monocytogenes_1639_v125 | 0.9412 |
| Listeria_monocytogenes_serotype_1_2a_str_08-6569_1196183 | Listeria_monocytogenes_1639_v125 | 0.9412 |
| Listeria_monocytogenes_serotype_1_2a_str_08-6056_1196182 | Listeria_monocytogenes_1639_v125 | 0.9412 |
| Listeria_monocytogenes_serotype_1_2a_str_04-5457_1196181 | Listeria_monocytogenes_1639_v125 | 0.9461 |
| Listeria_monocytogenes_serotype_1_2a_str_02-5993_1196180 | Listeria_monocytogenes_1639_v125 | 0.9458 |
| Listeria_monocytogenes_R479a_1437838                     | Listeria_monocytogenes_1639_v125 | 0.9432 |
| Listeria_monocytogenes_N53-1_1234142                     | Listeria_monocytogenes_1639_v125 | 0.909  |
| Listeria_monocytogenes_M7_1030009                        | Listeria_monocytogenes_1639_v125 | 0.9078 |
| Listeria_monocytogenes_LO28_393132                       | Listeria_monocytogenes_1639_v125 | 0.9414 |
| Listeria_monocytogenes_L99_563174                        | Listeria_monocytogenes_1639_v125 | 0.9084 |
| Listeria_monocytogenes_L312_882094                       | Listeria_monocytogenes_1639_v125 | 0.9408 |
| Listeria_monocytogenes_J1816_930781                      | Listeria_monocytogenes_1639_v125 | 0.9339 |
| Listeria_monocytogenes_J1-220_930782                     | Listeria_monocytogenes_1639_v125 | 0.9218 |
| Listeria_monocytogenes_J0161_393130                      | Listeria_monocytogenes_1639_v125 | 0.9624 |
| Listeria_monocytogenes_HCC23_552536                      | Listeria_monocytogenes_1639_v125 | 0.9077 |
| Listeria_monocytogenes_FSL_R2-561_393126                 | Listeria_monocytogenes_1639_v125 | 0.9451 |
| Listeria_monocytogenes_FSL_J1-208_393119                 | Listeria_monocytogenes_1639_v125 | 0.9028 |
| Listeria_monocytogenes_FSL_J1-175_393118                 | Listeria_monocytogenes_1639_v125 | 0.9345 |
| Listeria_monocytogenes_Finland_1998_393127               | Listeria_monocytogenes_1639_v125 | 0.9626 |
| Listeria_monocytogenes_EGD-e_169963_v1                   | Listeria_monocytogenes_1639_v125 | 0.9518 |
| Listeria_monocytogenes_EGD-e_169963                      | Listeria_monocytogenes_1639_v125 | 0.9518 |
| Listeria_monocytogenes_EGD_1334565                       | Listeria_monocytogenes_1639_v125 | 0.9539 |
| Listeria_monocytogenes_CFSAN002349_1299895               | Listeria_monocytogenes_1639_v125 | 0.9387 |
| Listeria_monocytogenes_ATCC_19117_882095_v1              | Listeria_monocytogenes_1639_v125 | 0.935  |
| Listeria_monocytogenes_ATCC_19117_882095                 | Listeria_monocytogenes_1639_v125 | 0.935  |
| Listeria_monocytogenes_6179_1288295                      | Listeria_monocytogenes_1639_v125 | 0.9451 |
| Listeria_monocytogenes_1639_v9                           | Listeria_monocytogenes_1639_v125 | 0.9198 |
| Listeria_monocytogenes_1639_v99                          | Listeria_monocytogenes_1639_v125 | 0.935  |
| Listeria_monocytogenes_1639_v98                          | Listeria_monocytogenes_1639_v125 | 0.9514 |
| Listeria_monocytogenes_1639_v97                          | Listeria_monocytogenes_1639_v125 | 0.9402 |
| Listeria_monocytogenes_1639_v96                          | Listeria_monocytogenes_1639_v125 | 0.9343 |
| Listeria_monocytogenes_1639_v95                          | Listeria_monocytogenes_1639_v125 | 0.9343 |
| Listeria_monocytogenes_1639_v94                          | Listeria_monocytogenes_1639_v125 | 0.9347 |
| Listeria_monocytogenes_1639_v93                          | Listeria_monocytogenes_1639_v125 | 0.9431 |
| Listeria_monocytogenes_1639_v92                          | Listeria_monocytogenes_1639_v125 | 0.9347 |
| Listeria_monocytogenes_1639_v91                          | Listeria_monocytogenes_1639_v125 | 0.9248 |
| Listeria_monocytogenes_1639_v90                          | Listeria_monocytogenes_1639_v125 | 0.9514 |
| Listeria_monocytogenes_1639_v8                           | Listeria_monocytogenes_1639_v125 | 0.9335 |
| Listeria_monocytogenes_1639_v89                          | Listeria_monocytogenes_1639_v125 | 0.9354 |
| Listeria_monocytogenes_1639_v88                          | Listeria_monocytogenes_1639_v125 | 0.957  |
| Listeria_monocytogenes_1639_v87                          | Listeria_monocytogenes_1639_v125 | 0.9455 |
| Listeria_monocytogenes_1639_v86                          | Listeria_monocytogenes_1639_v125 | 0.9451 |
| Listeria_monocytogenes_1639_v85                          | Listeria_monocytogenes_1639_v125 | 0.9258 |
| Listeria_monocytogenes_1639_v84                          | Listeria_monocytogenes_1639_v125 | 0.9606 |
| Listeria_monocytogenes_1639_v83                          | Listeria_monocytogenes_1639_v125 | 0.9286 |
| Listeria_monocytogenes_1639_v82                          | Listeria_monocytogenes_1639_v125 | 0.9279 |
| Listeria_monocytogenes_1639_v81                          | Listeria_monocytogenes_1639_v125 | 0.9554 |
| Listeria_monocytogenes_1639_v80                          | Listeria_monocytogenes_1639_v125 | 0.9296 |
| Listeria_monocytogenes_1639_v7                           | Listeria_monocytogenes_1639_v125 | 0.9335 |
| Listeria_monocytogenes_1639_v79                          | Listeria_monocytogenes_1639_v125 | 0.954  |
| Listeria_monocytogenes_1639_v78                          | Listeria_monocytogenes_1639_v125 | 0.9551 |
| Listeria_monocytogenes_1639_v77                          | Listeria_monocytogenes_1639_v125 | 0.9606 |
| Listeria_monocytogenes_1639_v76                          | Listeria_monocytogenes_1639_v125 | 0.9472 |
| Listeria_monocytogenes_1639_v75                          | Listeria_monocytogenes_1639_v125 | 0.9084 |
| Listeria_monocytogenes_1639_v74                          | Listeria_monocytogenes_1639_v125 | 0.944  |
| Listeria_monocytogenes_1639_v73                          | Listeria_monocytogenes_1639_v125 | 0.9364 |
| Listeria_monocytogenes_1639_v72                          | Listeria_monocytogenes_1639_v125 | 0.9281 |

[illegible]

|                                                          |                                  |        |
|----------------------------------------------------------|----------------------------------|--------|
| Listeria_monocytogenes_1639_v169                         | Listeria_monocytogenes_1639_v125 | 0.9598 |
| Listeria_monocytogenes_1639_v168                         | Listeria_monocytogenes_1639_v125 | 0.9888 |
| Listeria_monocytogenes_1639_v167                         | Listeria_monocytogenes_1639_v125 | 0.9724 |
| Listeria_monocytogenes_1639_v166                         | Listeria_monocytogenes_1639_v125 | 0.9892 |
| Listeria_monocytogenes_1639_v165                         | Listeria_monocytogenes_1639_v125 | 0.9594 |
| Listeria_monocytogenes_1639_v164                         | Listeria_monocytogenes_1639_v125 | 0.9374 |
| Listeria_monocytogenes_1639_v163                         | Listeria_monocytogenes_1639_v125 | 0.9459 |
| Listeria_monocytogenes_1639_v162                         | Listeria_monocytogenes_1639_v125 | 0.9374 |
| Listeria_monocytogenes_1639_v161                         | Listeria_monocytogenes_1639_v125 | 0.9366 |
| Listeria_monocytogenes_1639_v160                         | Listeria_monocytogenes_1639_v125 | 0.9367 |
| Listeria_monocytogenes_1639_v15                          | Listeria_monocytogenes_1639_v125 | 0.9122 |
| Listeria_monocytogenes_1639_v159                         | Listeria_monocytogenes_1639_v125 | 0.9426 |
| Listeria_monocytogenes_1639_v158                         | Listeria_monocytogenes_1639_v125 | 0.9363 |
| Listeria_monocytogenes_1639_v157                         | Listeria_monocytogenes_1639_v125 | 0.9363 |
| Listeria_monocytogenes_1639_v156                         | Listeria_monocytogenes_1639_v125 | 0.9472 |
| Listeria_monocytogenes_1639_v155                         | Listeria_monocytogenes_1639_v125 | 0.9622 |
| Listeria_monocytogenes_1639_v154                         | Listeria_monocytogenes_1639_v125 | 0.9531 |
| Listeria_monocytogenes_1639_v153                         | Listeria_monocytogenes_1639_v125 | 0.9553 |
| Listeria_monocytogenes_1639_v152                         | Listeria_monocytogenes_1639_v125 | 0.9429 |
| Listeria_monocytogenes_1639_v151                         | Listeria_monocytogenes_1639_v125 | 0.9429 |
| Listeria_monocytogenes_1639_v150                         | Listeria_monocytogenes_1639_v125 | 0.9553 |
| Listeria_monocytogenes_1639_v14                          | Listeria_monocytogenes_1639_v125 | 0.9194 |
| Listeria_monocytogenes_1639_v149                         | Listeria_monocytogenes_1639_v125 | 0.9539 |
| Listeria_monocytogenes_1639_v148                         | Listeria_monocytogenes_1639_v125 | 0.9414 |
| Listeria_monocytogenes_1639_v147                         | Listeria_monocytogenes_1639_v125 | 0.9291 |
| Listeria_monocytogenes_1639_v146                         | Listeria_monocytogenes_1639_v125 | 0.96   |
| Listeria_monocytogenes_1639_v145                         | Listeria_monocytogenes_1639_v125 | 0.962  |
| Listeria_monocytogenes_1639_v144                         | Listeria_monocytogenes_1639_v125 | 0.9401 |
| Listeria_monocytogenes_1639_v143                         | Listeria_monocytogenes_1639_v125 | 0.9635 |
| Listeria_monocytogenes_1639_v142                         | Listeria_monocytogenes_1639_v125 | 0.9405 |
| Listeria_monocytogenes_1639_v141                         | Listeria_monocytogenes_1639_v125 | 0.9462 |
| Listeria_monocytogenes_1639_v140                         | Listeria_monocytogenes_1639_v125 | 0.9408 |
| Listeria_monocytogenes_1639_v13                          | Listeria_monocytogenes_1639_v125 | 0.9126 |
| Listeria_monocytogenes_1639_v139                         | Listeria_monocytogenes_1639_v125 | 0.9402 |
| Listeria_monocytogenes_1639_v138                         | Listeria_monocytogenes_1639_v125 | 0.9432 |
| Listeria_monocytogenes_1639_v137                         | Listeria_monocytogenes_1639_v125 | 0.9428 |
| Listeria_monocytogenes_1639_v136                         | Listeria_monocytogenes_1639_v125 | 0.951  |
| Listeria_monocytogenes_1639_v135                         | Listeria_monocytogenes_1639_v125 | 0.9193 |
| Listeria_monocytogenes_1639_v134                         | Listeria_monocytogenes_1639_v125 | 0.9304 |
| Listeria_monocytogenes_1639_v133                         | Listeria_monocytogenes_1639_v125 | 0.9638 |
| Listeria_monocytogenes_1639_v132                         | Listeria_monocytogenes_1639_v125 | 0.9168 |
| Listeria_monocytogenes_1639_v131                         | Listeria_monocytogenes_1639_v125 | 0.9363 |
| Listeria_monocytogenes_1639_v130                         | Listeria_monocytogenes_1639_v125 | 0.9405 |
| Listeria_monocytogenes_1639_v12                          | Listeria_monocytogenes_1639_v125 | 0.9275 |
| Listeria_monocytogenes_1639_v129                         | Listeria_monocytogenes_1639_v125 | 0.9416 |
| Listeria_monocytogenes_1639_v128                         | Listeria_monocytogenes_1639_v125 | 0.9418 |
| Listeria_monocytogenes_1639_v127                         | Listeria_monocytogenes_1639_v125 | 0.9601 |
| Listeria_monocytogenes_1639_v126                         | Listeria_monocytogenes_1639_v125 | 0.943  |
| Listeria_monocytogenes_1639_v125                         | Listeria_monocytogenes_1639_v125 | 0.0679 |
| Listeria_welshimeri_1643                                 | Listeria_monocytogenes_1639_v126 | 0.8832 |
| Listeria_welshimeri_serovar_6b_str_SLCC5334_386043       | Listeria_monocytogenes_1639_v126 | 0.8825 |
| Listeria_seeligeri_serovar_1_2b_str_SLCC3954_683837      | Listeria_monocytogenes_1639_v126 | 0.8948 |
| Listeria_seeligeri_FSL_S4-171_702452                     | Listeria_monocytogenes_1639_v126 | 0.83   |
| Listeria_seeligeri_FSL_N1-067_702453                     | Listeria_monocytogenes_1639_v126 | 0.8358 |
| Listeria_seeligeri_1640_v1                               | Listeria_monocytogenes_1639_v126 | 0.8977 |
| Listeria_seeligeri_1640                                  | Listeria_monocytogenes_1639_v126 | 0.8858 |
| Listeria_monocytogenes_WSLC1042_1457188                  | Listeria_monocytogenes_1639_v126 | 0.9599 |
| Listeria_monocytogenes_WSLC1001_1457187                  | Listeria_monocytogenes_1639_v126 | 0.9422 |
| Listeria_monocytogenes_SLCC7179_879090                   | Listeria_monocytogenes_1639_v126 | 0.9485 |
| Listeria_monocytogenes_SLCC5850_882096                   | Listeria_monocytogenes_1639_v126 | 0.9461 |
| Listeria_monocytogenes_SLCC2755_932919                   | Listeria_monocytogenes_1639_v126 | 0.9538 |
| Listeria_monocytogenes_SLCC2540_879089                   | Listeria_monocytogenes_1639_v126 | 0.9604 |
| Listeria_monocytogenes_SLCC2479_882020                   | Listeria_monocytogenes_1639_v126 | 0.9392 |
| Listeria_monocytogenes_SLCC2378_879088                   | Listeria_monocytogenes_1639_v126 | 0.961  |
| Listeria_monocytogenes_SLCC2376_882097                   | Listeria_monocytogenes_1639_v126 | 0.9451 |
| Listeria_monocytogenes_SLCC2372_932920                   | Listeria_monocytogenes_1639_v126 | 0.9318 |
| Listeria_monocytogenes_serotype_4b_str_LL195_1230340     | Listeria_monocytogenes_1639_v126 | 0.965  |
| Listeria_monocytogenes_serotype_4b_str_LIS0087_1134669   | Listeria_monocytogenes_1639_v126 | 0.9233 |
| Listeria_monocytogenes_serotype_4b_str_F2365_265669      | Listeria_monocytogenes_1639_v126 | 0.965  |
| Listeria_monocytogenes_serotype_4b_str_CLIP_80459_568819 | Listeria_monocytogenes_1639_v126 | 0.9661 |
| Listeria_monocytogenes_serotype_4b_str_81-0861_1196161   | Listeria_monocytogenes_1639_v126 | 0.9505 |
| Listeria_monocytogenes_serotype_4b_str_81-0592_1196160   | Listeria_monocytogenes_1639_v126 | 0.9516 |
| Listeria_monocytogenes_serotype_4b_str_81-0558_1196159   | Listeria_monocytogenes_1639_v126 | 0.9527 |
| Listeria_monocytogenes_serotype_4b_str_10-0809_1196162   | Listeria_monocytogenes_1639_v126 | 0.9519 |
| Listeria_monocytogenes_serotype_4b_str_02-6680_1196175   | Listeria_monocytogenes_1639_v126 | 0.9635 |
| Listeria_monocytogenes_serotype_4b_str_02-6679_1196174   | Listeria_monocytogenes_1639_v126 | 0.9635 |
| Listeria_monocytogenes_serotype_4b_str_02-1792_1196173   | Listeria_monocytogenes_1639_v126 | 0.9527 |
| Listeria_monocytogenes_serotype_4b_str_02-1289_1196172   | Listeria_monocytogenes_1639_v126 | 0.9527 |
| Listeria_monocytogenes_serotype_4b_str_02-1103_1196171   | Listeria_monocytogenes_1639_v126 | 0.9527 |
| Listeria_monocytogenes_serotype_3c_str_10-5027_1196195   | Listeria_monocytogenes_1639_v126 | 0.9388 |
| Listeria_monocytogenes_serotype_1_2c_str_10-5026_1196194 | Listeria_monocytogenes_1639_v126 | 0.9399 |
| Listeria_monocytogenes_serotype_1_2c_str_10-5025_1196193 | Listeria_monocytogenes_1639_v126 | 0.9399 |
| Listeria_monocytogenes_serotype_1_2b_str_10-0811_1196164 | Listeria_monocytogenes_1639_v126 | 0.9488 |
| Listeria_monocytogenes_serotype_1_2b_str_10-0810_1196163 | Listeria_monocytogenes_1639_v126 | 0.9488 |
| Listeria_monocytogenes_serotype_1_2a_str_99-6370_1196179 | Listeria_monocytogenes_1639_v126 | 0.9288 |
| Listeria_monocytogenes_serotype_1_2a_str_98-2035_1196178 | Listeria_monocytogenes_1639_v126 | 0.9288 |
| Listeria_monocytogenes_serotype_1_2a_str_95-0093_1196177 | Listeria_monocytogenes_1639_v126 | 0.9347 |
| Listeria_monocytogenes_serotype_1_2a_str_88-0478_1196176 | Listeria_monocytogenes_1639_v126 | 0.9339 |
| Listeria_monocytogenes_serotype_1_2a_str_10-5024_1196192 | Listeria_monocytogenes_1639_v126 | 0.9351 |
| Listeria_monocytogenes_serotype_1_2a_str_10-4758_1196168 | Listeria_monocytogenes_1639_v126 | 0.9477 |
| Listeria_monocytogenes_serotype_1_2a_str_10-4754_1196167 | Listeria_monocytogenes_1639_v126 | 0.9473 |

|                                                          |                                  |        |
|----------------------------------------------------------|----------------------------------|--------|
| Listeria_monocytogenes_serotype_1_2a_str_10-1321_1196191 | Listeria_monocytogenes_1639_v126 | 0.9351 |
| Listeria_monocytogenes_serotype_1_2a_str_10-1047_1196190 | Listeria_monocytogenes_1639_v126 | 0.9354 |
| Listeria_monocytogenes_serotype_1_2a_str_10-1046_1196189 | Listeria_monocytogenes_1639_v126 | 0.9354 |
| Listeria_monocytogenes_serotype_1_2a_str_10-0934_1196170 | Listeria_monocytogenes_1639_v126 | 0.9575 |
| Listeria_monocytogenes_serotype_1_2a_str_10-0933_1196169 | Listeria_monocytogenes_1639_v126 | 0.9575 |
| Listeria_monocytogenes_serotype_1_2a_str_10-0815_1196188 | Listeria_monocytogenes_1639_v126 | 0.9302 |
| Listeria_monocytogenes_serotype_1_2a_str_10-0814_1196187 | Listeria_monocytogenes_1639_v126 | 0.9347 |
| Listeria_monocytogenes_serotype_1_2a_str_10-0813_1196166 | Listeria_monocytogenes_1639_v126 | 0.9397 |
| Listeria_monocytogenes_serotype_1_2a_str_10-0812_1196165 | Listeria_monocytogenes_1639_v126 | 0.9397 |
| Listeria_monocytogenes_serotype_1_2a_str_08-7669_1196186 | Listeria_monocytogenes_1639_v126 | 0.9439 |
| Listeria_monocytogenes_serotype_1_2a_str_08-7374_1196185 | Listeria_monocytogenes_1639_v126 | 0.9351 |
| Listeria_monocytogenes_serotype_1_2a_str_08-6997_1196184 | Listeria_monocytogenes_1639_v126 | 0.9302 |
| Listeria_monocytogenes_serotype_1_2a_str_08-6569_1196183 | Listeria_monocytogenes_1639_v126 | 0.9302 |
| Listeria_monocytogenes_serotype_1_2a_str_08-6056_1196182 | Listeria_monocytogenes_1639_v126 | 0.9302 |
| Listeria_monocytogenes_serotype_1_2a_str_04-5457_1196181 | Listeria_monocytogenes_1639_v126 | 0.9351 |
| Listeria_monocytogenes_serotype_1_2a_str_02-5993_1196180 | Listeria_monocytogenes_1639_v126 | 0.9347 |
| Listeria_monocytogenes_R479a_1437838                     | Listeria_monocytogenes_1639_v126 | 0.9333 |
| Listeria_monocytogenes_N53-1_1234142                     | Listeria_monocytogenes_1639_v126 | 0.9002 |
| Listeria_monocytogenes_M7_1030009                        | Listeria_monocytogenes_1639_v126 | 0.9063 |
| Listeria_monocytogenes_LO28_393132                       | Listeria_monocytogenes_1639_v126 | 0.9381 |
| Listeria_monocytogenes_L99_563174                        | Listeria_monocytogenes_1639_v126 | 0.907  |
| Listeria_monocytogenes_L312_882094                       | Listeria_monocytogenes_1639_v126 | 0.9665 |
| Listeria_monocytogenes_J1816_930781                      | Listeria_monocytogenes_1639_v126 | 0.9465 |
| Listeria_monocytogenes_J1-220_930782                     | Listeria_monocytogenes_1639_v126 | 0.9425 |
| Listeria_monocytogenes_J0161_393130                      | Listeria_monocytogenes_1639_v126 | 0.937  |
| Listeria_monocytogenes_HCC23_552536                      | Listeria_monocytogenes_1639_v126 | 0.9063 |
| Listeria_monocytogenes_FSL_R2-561_393126                 | Listeria_monocytogenes_1639_v126 | 0.9374 |
| Listeria_monocytogenes_FSL_J1-208_393119                 | Listeria_monocytogenes_1639_v126 | 0.9155 |
| Listeria_monocytogenes_FSL_J1-175_393118                 | Listeria_monocytogenes_1639_v126 | 0.9603 |
| Listeria_monocytogenes_Finland_1998_393127               | Listeria_monocytogenes_1639_v126 | 0.9567 |
| Listeria_monocytogenes_EGD-e_169963_v1                   | Listeria_monocytogenes_1639_v126 | 0.952  |
| Listeria_monocytogenes_EGD-e_169963                      | Listeria_monocytogenes_1639_v126 | 0.952  |
| Listeria_monocytogenes_EGD_1334565                       | Listeria_monocytogenes_1639_v126 | 0.9468 |
| Listeria_monocytogenes_CFSAN002349_1299895               | Listeria_monocytogenes_1639_v126 | 0.9662 |
| Listeria_monocytogenes_ATCC_19117_882095_v1              | Listeria_monocytogenes_1639_v126 | 0.9609 |
| Listeria_monocytogenes_ATCC_19117_882095                 | Listeria_monocytogenes_1639_v126 | 0.9609 |
| Listeria_monocytogenes_6179_1288295                      | Listeria_monocytogenes_1639_v126 | 0.9211 |
| Listeria_monocytogenes_1639_v9                           | Listeria_monocytogenes_1639_v126 | 0.9332 |
| Listeria_monocytogenes_1639_v99                          | Listeria_monocytogenes_1639_v126 | 0.9469 |
| Listeria_monocytogenes_1639_v98                          | Listeria_monocytogenes_1639_v126 | 0.9339 |
| Listeria_monocytogenes_1639_v97                          | Listeria_monocytogenes_1639_v126 | 0.9544 |
| Listeria_monocytogenes_1639_v96                          | Listeria_monocytogenes_1639_v126 | 0.9469 |
| Listeria_monocytogenes_1639_v95                          | Listeria_monocytogenes_1639_v126 | 0.9465 |
| Listeria_monocytogenes_1639_v94                          | Listeria_monocytogenes_1639_v126 | 0.9469 |
| Listeria_monocytogenes_1639_v93                          | Listeria_monocytogenes_1639_v126 | 0.9339 |
| Listeria_monocytogenes_1639_v92                          | Listeria_monocytogenes_1639_v126 | 0.9472 |
| Listeria_monocytogenes_1639_v91                          | Listeria_monocytogenes_1639_v126 | 0.9483 |
| Listeria_monocytogenes_1639_v90                          | Listeria_monocytogenes_1639_v126 | 0.9339 |
| Listeria_monocytogenes_1639_v8                           | Listeria_monocytogenes_1639_v126 | 0.9229 |
| Listeria_monocytogenes_1639_v89                          | Listeria_monocytogenes_1639_v126 | 0.9588 |
| Listeria_monocytogenes_1639_v88                          | Listeria_monocytogenes_1639_v126 | 0.9405 |
| Listeria_monocytogenes_1639_v87                          | Listeria_monocytogenes_1639_v126 | 0.9362 |
| Listeria_monocytogenes_1639_v86                          | Listeria_monocytogenes_1639_v126 | 0.9355 |
| Listeria_monocytogenes_1639_v85                          | Listeria_monocytogenes_1639_v126 | 0.9501 |
| Listeria_monocytogenes_1639_v84                          | Listeria_monocytogenes_1639_v126 | 0.9423 |
| Listeria_monocytogenes_1639_v83                          | Listeria_monocytogenes_1639_v126 | 0.9515 |
| Listeria_monocytogenes_1639_v82                          | Listeria_monocytogenes_1639_v126 | 0.9511 |
| Listeria_monocytogenes_1639_v81                          | Listeria_monocytogenes_1639_v126 | 0.9397 |
| Listeria_monocytogenes_1639_v80                          | Listeria_monocytogenes_1639_v126 | 0.9533 |
| Listeria_monocytogenes_1639_v7                           | Listeria_monocytogenes_1639_v126 | 0.9229 |
| Listeria_monocytogenes_1639_v79                          | Listeria_monocytogenes_1639_v126 | 0.938  |
| Listeria_monocytogenes_1639_v78                          | Listeria_monocytogenes_1639_v126 | 0.939  |
| Listeria_monocytogenes_1639_v77                          | Listeria_monocytogenes_1639_v126 | 0.9449 |
| Listeria_monocytogenes_1639_v76                          | Listeria_monocytogenes_1639_v126 | 0.932  |
| Listeria_monocytogenes_1639_v75                          | Listeria_monocytogenes_1639_v126 | 0.907  |
| Listeria_monocytogenes_1639_v74                          | Listeria_monocytogenes_1639_v126 | 0.9329 |
| Listeria_monocytogenes_1639_v73                          | Listeria_monocytogenes_1639_v126 | 0.934  |
| Listeria_monocytogenes_1639_v72                          | Listeria_monocytogenes_1639_v126 | 0.9495 |
| Listeria_monocytogenes_1639_v71                          | Listeria_monocytogenes_1639_v126 | 0.921  |
| Listeria_monocytogenes_1639_v70                          | Listeria_monocytogenes_1639_v126 | 0.9356 |
| Listeria_monocytogenes_1639_v6                           | Listeria_monocytogenes_1639_v126 | 0.9222 |
| Listeria_monocytogenes_1639_v69                          | Listeria_monocytogenes_1639_v126 | 0.9519 |
| Listeria_monocytogenes_1639_v68                          | Listeria_monocytogenes_1639_v126 | 0.9439 |
| Listeria_monocytogenes_1639_v67                          | Listeria_monocytogenes_1639_v126 | 0.9526 |
| Listeria_monocytogenes_1639_v66                          | Listeria_monocytogenes_1639_v126 | 0.9428 |
| Listeria_monocytogenes_1639_v65                          | Listeria_monocytogenes_1639_v126 | 0.9375 |
| Listeria_monocytogenes_1639_v64                          | Listeria_monocytogenes_1639_v126 | 0.9361 |
| Listeria_monocytogenes_1639_v63                          | Listeria_monocytogenes_1639_v126 | 0.9492 |
| Listeria_monocytogenes_1639_v62                          | Listeria_monocytogenes_1639_v126 | 0.9366 |
| Listeria_monocytogenes_1639_v61                          | Listeria_monocytogenes_1639_v126 | 0.9379 |
| Listeria_monocytogenes_1639_v60                          | Listeria_monocytogenes_1639_v126 | 0.9378 |
| Listeria_monocytogenes_1639_v5                           | Listeria_monocytogenes_1639_v126 | 0.9131 |
| Listeria_monocytogenes_1639_v59                          | Listeria_monocytogenes_1639_v126 | 0.9514 |
| Listeria_monocytogenes_1639_v58                          | Listeria_monocytogenes_1639_v126 | 0.9564 |
| Listeria_monocytogenes_1639_v57                          | Listeria_monocytogenes_1639_v126 | 0.9426 |
| Listeria_monocytogenes_1639_v56                          | Listeria_monocytogenes_1639_v126 | 0.9511 |
| Listeria_monocytogenes_1639_v55                          | Listeria_monocytogenes_1639_v126 | 0.9395 |
| Listeria_monocytogenes_1639_v54                          | Listeria_monocytogenes_1639_v126 | 0.9252 |
| Listeria_monocytogenes_1639_v53                          | Listeria_monocytogenes_1639_v126 | 0.9393 |
| Listeria_monocytogenes_1639_v52                          | Listeria_monocytogenes_1639_v126 | 0.9463 |
| Listeria_monocytogenes_1639_v51                          | Listeria_monocytogenes_1639_v126 | 0.9461 |

[illegible]







[illegible]

|                                                          |                                  |        |
|----------------------------------------------------------|----------------------------------|--------|
| Listeria_welshimeri_1643                                 | Listeria_monocytogenes_1639_v128 | 0.8836 |
| Listeria_welshimeri_serovar_6b_str_SLCC5334_386043       | Listeria_monocytogenes_1639_v128 | 0.8832 |
| Listeria_seeligeri_serovar_1_2b_str_SLCC3954_683837      | Listeria_monocytogenes_1639_v128 | 0.8951 |
| Listeria_seeligeri_FSL_S4-171_702452                     | Listeria_monocytogenes_1639_v128 | 0.8308 |
| Listeria_seeligeri_FSL_N1-067_702453                     | Listeria_monocytogenes_1639_v128 | 0.8358 |
| Listeria_seeligeri_1640_v1                               | Listeria_monocytogenes_1639_v128 | 0.8985 |
| Listeria_seeligeri_1640                                  | Listeria_monocytogenes_1639_v128 | 0.8865 |
| Listeria_monocytogenes_WSLC1042_1457188                  | Listeria_monocytogenes_1639_v128 | 0.9618 |
| Listeria_monocytogenes_WSLC1001_1457187                  | Listeria_monocytogenes_1639_v128 | 0.941  |
| Listeria_monocytogenes_SLCC7179_879090                   | Listeria_monocytogenes_1639_v128 | 0.947  |
| Listeria_monocytogenes_SLCC5850_882096                   | Listeria_monocytogenes_1639_v128 | 0.945  |
| Listeria_monocytogenes_SLCC2755_932919                   | Listeria_monocytogenes_1639_v128 | 0.9553 |
| Listeria_monocytogenes_SLCC2540_879089                   | Listeria_monocytogenes_1639_v128 | 0.9619 |
| Listeria_monocytogenes_SLCC2479_882020                   | Listeria_monocytogenes_1639_v128 | 0.9395 |
| Listeria_monocytogenes_SLCC2378_879088                   | Listeria_monocytogenes_1639_v128 | 0.9625 |
| Listeria_monocytogenes_SLCC2376_882097                   | Listeria_monocytogenes_1639_v128 | 0.9459 |
| Listeria_monocytogenes_SLCC2372_932920                   | Listeria_monocytogenes_1639_v128 | 0.9321 |
| Listeria_monocytogenes_serotype_4b_str_LL195_1230340     | Listeria_monocytogenes_1639_v128 | 0.9665 |
| Listeria_monocytogenes_serotype_4b_str_LIS0087_1134669   | Listeria_monocytogenes_1639_v128 | 0.9228 |
| Listeria_monocytogenes_serotype_4b_str_F2365_265669      | Listeria_monocytogenes_1639_v128 | 0.9665 |
| Listeria_monocytogenes_serotype_4b_str_CLIP_80459_568819 | Listeria_monocytogenes_1639_v128 | 0.9676 |
| Listeria_monocytogenes_serotype_4b_str_81-0861_1196161   | Listeria_monocytogenes_1639_v128 | 0.9523 |
| Listeria_monocytogenes_serotype_4b_str_81-0592_1196160   | Listeria_monocytogenes_1639_v128 | 0.9534 |
| Listeria_monocytogenes_serotype_4b_str_81-0558_1196159   | Listeria_monocytogenes_1639_v128 | 0.9542 |
| Listeria_monocytogenes_serotype_4b_str_10-0809_1196162   | Listeria_monocytogenes_1639_v128 | 0.9538 |
| Listeria_monocytogenes_serotype_4b_str_02-6680_1196175   | Listeria_monocytogenes_1639_v128 | 0.9654 |
| Listeria_monocytogenes_serotype_4b_str_02-6679_1196174   | Listeria_monocytogenes_1639_v128 | 0.9654 |
| Listeria_monocytogenes_serotype_4b_str_02-1792_1196173   | Listeria_monocytogenes_1639_v128 | 0.9542 |
| Listeria_monocytogenes_serotype_4b_str_02-1289_1196172   | Listeria_monocytogenes_1639_v128 | 0.9542 |
| Listeria_monocytogenes_serotype_4b_str_02-1103_1196171   | Listeria_monocytogenes_1639_v128 | 0.9542 |
| Listeria_monocytogenes_serotype_3c_str_10-5027_1196195   | Listeria_monocytogenes_1639_v128 | 0.9391 |
| Listeria_monocytogenes_serotype_1_2c_str_10-5026_1196194 | Listeria_monocytogenes_1639_v128 | 0.9399 |
| Listeria_monocytogenes_serotype_1_2c_str_10-5025_1196193 | Listeria_monocytogenes_1639_v128 | 0.9399 |
| Listeria_monocytogenes_serotype_1_2b_str_10-0811_1196164 | Listeria_monocytogenes_1639_v128 | 0.9507 |
| Listeria_monocytogenes_serotype_1_2b_str_10-0810_1196163 | Listeria_monocytogenes_1639_v128 | 0.9507 |
| Listeria_monocytogenes_serotype_1_2a_str_99-6370_1196179 | Listeria_monocytogenes_1639_v128 | 0.928  |
| Listeria_monocytogenes_serotype_1_2a_str_98-2035_1196178 | Listeria_monocytogenes_1639_v128 | 0.928  |
| Listeria_monocytogenes_serotype_1_2a_str_95-0093_1196177 | Listeria_monocytogenes_1639_v128 | 0.9336 |
| Listeria_monocytogenes_serotype_1_2a_str_88-0478_1196176 | Listeria_monocytogenes_1639_v128 | 0.9324 |
| Listeria_monocytogenes_serotype_1_2a_str_10-5024_1196192 | Listeria_monocytogenes_1639_v128 | 0.9336 |
| Listeria_monocytogenes_serotype_1_2a_str_10-4758_1196168 | Listeria_monocytogenes_1639_v128 | 0.9462 |
| Listeria_monocytogenes_serotype_1_2a_str_10-4754_1196167 | Listeria_monocytogenes_1639_v128 | 0.9462 |
| Listeria_monocytogenes_serotype_1_2a_str_10-1321_1196191 | Listeria_monocytogenes_1639_v128 | 0.9336 |
| Listeria_monocytogenes_serotype_1_2a_str_10-1047_1196190 | Listeria_monocytogenes_1639_v128 | 0.9343 |
| Listeria_monocytogenes_serotype_1_2a_str_10-1046_1196189 | Listeria_monocytogenes_1639_v128 | 0.9343 |
| Listeria_monocytogenes_serotype_1_2a_str_10-0934_1196170 | Listeria_monocytogenes_1639_v128 | 0.9563 |
| Listeria_monocytogenes_serotype_1_2a_str_10-0933_1196169 | Listeria_monocytogenes_1639_v128 | 0.9563 |
| Listeria_monocytogenes_serotype_1_2a_str_10-0815_1196188 | Listeria_monocytogenes_1639_v128 | 0.9294 |
| Listeria_monocytogenes_serotype_1_2a_str_10-0814_1196187 | Listeria_monocytogenes_1639_v128 | 0.9339 |
| Listeria_monocytogenes_serotype_1_2a_str_10-0813_1196166 | Listeria_monocytogenes_1639_v128 | 0.9393 |
| Listeria_monocytogenes_serotype_1_2a_str_10-0812_1196165 | Listeria_monocytogenes_1639_v128 | 0.9393 |
| Listeria_monocytogenes_serotype_1_2a_str_08-7669_1196186 | Listeria_monocytogenes_1639_v128 | 0.9427 |
| Listeria_monocytogenes_serotype_1_2a_str_08-7374_1196185 | Listeria_monocytogenes_1639_v128 | 0.9336 |
| Listeria_monocytogenes_serotype_1_2a_str_08-6997_1196184 | Listeria_monocytogenes_1639_v128 | 0.9294 |
| Listeria_monocytogenes_serotype_1_2a_str_08-6569_1196183 | Listeria_monocytogenes_1639_v128 | 0.9294 |
| Listeria_monocytogenes_serotype_1_2a_str_08-6056_1196182 | Listeria_monocytogenes_1639_v128 | 0.9294 |
| Listeria_monocytogenes_serotype_1_2a_str_04-5457_1196181 | Listeria_monocytogenes_1639_v128 | 0.9336 |
| Listeria_monocytogenes_serotype_1_2a_str_02-5993_1196180 | Listeria_monocytogenes_1639_v128 | 0.9336 |
| Listeria_monocytogenes_R479a_1437838                     | Listeria_monocytogenes_1639_v128 | 0.9321 |
| Listeria_monocytogenes_N53-1_1234142                     | Listeria_monocytogenes_1639_v128 | 0.8998 |
| Listeria_monocytogenes_M7_1030009                        | Listeria_monocytogenes_1639_v128 | 0.9078 |
| Listeria_monocytogenes_LO28_393132                       | Listeria_monocytogenes_1639_v128 | 0.9385 |
| Listeria_monocytogenes_L99_563174                        | Listeria_monocytogenes_1639_v128 | 0.9081 |
| Listeria_monocytogenes_L312_882094                       | Listeria_monocytogenes_1639_v128 | 0.968  |
| Listeria_monocytogenes_J1816_930781                      | Listeria_monocytogenes_1639_v128 | 0.9476 |
| Listeria_monocytogenes_J1-220_930782                     | Listeria_monocytogenes_1639_v128 | 0.9444 |
| Listeria_monocytogenes_J0161_393130                      | Listeria_monocytogenes_1639_v128 | 0.9355 |
| Listeria_monocytogenes_HCC23_552536                      | Listeria_monocytogenes_1639_v128 | 0.9074 |
| Listeria_monocytogenes_FSL_R2-561_393126                 | Listeria_monocytogenes_1639_v128 | 0.9377 |
| Listeria_monocytogenes_FSL_J1-208_393119                 | Listeria_monocytogenes_1639_v128 | 0.9166 |
| Listeria_monocytogenes_FSL_J1-175_393118                 | Listeria_monocytogenes_1639_v128 | 0.9625 |
| Listeria_monocytogenes_Finland_1998_393127               | Listeria_monocytogenes_1639_v128 | 0.9563 |
| Listeria_monocytogenes_EGD-e_169963_v1                   | Listeria_monocytogenes_1639_v128 | 0.9523 |
| Listeria_monocytogenes_EGD-e_169963                      | Listeria_monocytogenes_1639_v128 | 0.9527 |
| Listeria_monocytogenes_EGD_1334565                       | Listeria_monocytogenes_1639_v128 | 0.9457 |
| Listeria_monocytogenes_CFSAN002349_1299895               | Listeria_monocytogenes_1639_v128 | 0.9681 |
| Listeria_monocytogenes_ATCC_19117_882095_v1              | Listeria_monocytogenes_1639_v128 | 0.9628 |
| Listeria_monocytogenes_ATCC_19117_882095                 | Listeria_monocytogenes_1639_v128 | 0.9624 |
| Listeria_monocytogenes_6179_1288295                      | Listeria_monocytogenes_1639_v128 | 0.92   |
| Listeria_monocytogenes_1639_v9                           | Listeria_monocytogenes_1639_v128 | 0.9354 |
| Listeria_monocytogenes_1639_v99                          | Listeria_monocytogenes_1639_v128 | 0.9484 |
| Listeria_monocytogenes_1639_v98                          | Listeria_monocytogenes_1639_v128 | 0.9339 |
| Listeria_monocytogenes_1639_v97                          | Listeria_monocytogenes_1639_v128 | 0.9563 |
| Listeria_monocytogenes_1639_v96                          | Listeria_monocytogenes_1639_v128 | 0.948  |
| Listeria_monocytogenes_1639_v95                          | Listeria_monocytogenes_1639_v128 | 0.948  |
| Listeria_monocytogenes_1639_v94                          | Listeria_monocytogenes_1639_v128 | 0.9488 |
| Listeria_monocytogenes_1639_v93                          | Listeria_monocytogenes_1639_v128 | 0.9331 |
| Listeria_monocytogenes_1639_v92                          | Listeria_monocytogenes_1639_v128 | 0.9488 |
| Listeria_monocytogenes_1639_v91                          | Listeria_monocytogenes_1639_v128 | 0.9498 |
| Listeria_monocytogenes_1639_v90                          | Listeria_monocytogenes_1639_v128 | 0.9339 |
| Listeria_monocytogenes_1639_v8                           | Listeria_monocytogenes_1639_v128 | 0.9214 |

[illegible]

|                                                          |                                  |        |
|----------------------------------------------------------|----------------------------------|--------|
| Listeria_monocytogenes_1639_v186                         | Listeria_monocytogenes_1639_v128 | 0.9566 |
| Listeria_monocytogenes_1639_v185                         | Listeria_monocytogenes_1639_v128 | 0.9566 |
| Listeria_monocytogenes_1639_v184                         | Listeria_monocytogenes_1639_v128 | 0.9554 |
| Listeria_monocytogenes_1639_v183                         | Listeria_monocytogenes_1639_v128 | 0.9531 |
| Listeria_monocytogenes_1639_v182                         | Listeria_monocytogenes_1639_v128 | 0.9553 |
| Listeria_monocytogenes_1639_v181                         | Listeria_monocytogenes_1639_v128 | 0.9268 |
| Listeria_monocytogenes_1639_v180                         | Listeria_monocytogenes_1639_v128 | 0.9268 |
| Listeria_monocytogenes_1639_v17                          | Listeria_monocytogenes_1639_v128 | 0.94   |
| Listeria_monocytogenes_1639_v179                         | Listeria_monocytogenes_1639_v128 | 0.9398 |
| Listeria_monocytogenes_1639_v178                         | Listeria_monocytogenes_1639_v128 | 0.9574 |
| Listeria_monocytogenes_1639_v177                         | Listeria_monocytogenes_1639_v128 | 0.9658 |
| Listeria_monocytogenes_1639_v176                         | Listeria_monocytogenes_1639_v128 | 0.9432 |
| Listeria_monocytogenes_1639_v175                         | Listeria_monocytogenes_1639_v128 | 0.9466 |
| Listeria_monocytogenes_1639_v174                         | Listeria_monocytogenes_1639_v128 | 0.9605 |
| Listeria_monocytogenes_1639_v173                         | Listeria_monocytogenes_1639_v128 | 0.9772 |
| Listeria_monocytogenes_1639_v172                         | Listeria_monocytogenes_1639_v128 | 0.9376 |
| Listeria_monocytogenes_1639_v171                         | Listeria_monocytogenes_1639_v128 | 0.9416 |
| Listeria_monocytogenes_1639_v170                         | Listeria_monocytogenes_1639_v128 | 0.95   |
| Listeria_monocytogenes_1639_v16                          | Listeria_monocytogenes_1639_v128 | 0.9198 |
| Listeria_monocytogenes_1639_v169                         | Listeria_monocytogenes_1639_v128 | 0.9508 |
| Listeria_monocytogenes_1639_v168                         | Listeria_monocytogenes_1639_v128 | 0.949  |
| Listeria_monocytogenes_1639_v167                         | Listeria_monocytogenes_1639_v128 | 0.9404 |
| Listeria_monocytogenes_1639_v166                         | Listeria_monocytogenes_1639_v128 | 0.9494 |
| Listeria_monocytogenes_1639_v165                         | Listeria_monocytogenes_1639_v128 | 0.9504 |
| Listeria_monocytogenes_1639_v164                         | Listeria_monocytogenes_1639_v128 | 0.9661 |
| Listeria_monocytogenes_1639_v163                         | Listeria_monocytogenes_1639_v128 | 0.9734 |
| Listeria_monocytogenes_1639_v162                         | Listeria_monocytogenes_1639_v128 | 0.9661 |
| Listeria_monocytogenes_1639_v161                         | Listeria_monocytogenes_1639_v128 | 0.9672 |
| Listeria_monocytogenes_1639_v160                         | Listeria_monocytogenes_1639_v128 | 0.9669 |
| Listeria_monocytogenes_1639_v15                          | Listeria_monocytogenes_1639_v128 | 0.9349 |
| Listeria_monocytogenes_1639_v159                         | Listeria_monocytogenes_1639_v128 | 0.9662 |
| Listeria_monocytogenes_1639_v158                         | Listeria_monocytogenes_1639_v128 | 0.9669 |
| Listeria_monocytogenes_1639_v157                         | Listeria_monocytogenes_1639_v128 | 0.9665 |
| Listeria_monocytogenes_1639_v156                         | Listeria_monocytogenes_1639_v128 | 0.9346 |
| Listeria_monocytogenes_1639_v155                         | Listeria_monocytogenes_1639_v128 | 0.946  |
| Listeria_monocytogenes_1639_v154                         | Listeria_monocytogenes_1639_v128 | 0.9506 |
| Listeria_monocytogenes_1639_v153                         | Listeria_monocytogenes_1639_v128 | 0.9452 |
| Listeria_monocytogenes_1639_v152                         | Listeria_monocytogenes_1639_v128 | 0.9662 |
| Listeria_monocytogenes_1639_v151                         | Listeria_monocytogenes_1639_v128 | 0.9662 |
| Listeria_monocytogenes_1639_v150                         | Listeria_monocytogenes_1639_v128 | 0.9475 |
| Listeria_monocytogenes_1639_v14                          | Listeria_monocytogenes_1639_v128 | 0.9411 |
| Listeria_monocytogenes_1639_v149                         | Listeria_monocytogenes_1639_v128 | 0.9461 |
| Listeria_monocytogenes_1639_v148                         | Listeria_monocytogenes_1639_v128 | 0.9654 |
| Listeria_monocytogenes_1639_v147                         | Listeria_monocytogenes_1639_v128 | 0.9508 |
| Listeria_monocytogenes_1639_v146                         | Listeria_monocytogenes_1639_v128 | 0.9571 |
| Listeria_monocytogenes_1639_v145                         | Listeria_monocytogenes_1639_v128 | 0.9491 |
| Listeria_monocytogenes_1639_v144                         | Listeria_monocytogenes_1639_v128 | 0.9672 |
| Listeria_monocytogenes_1639_v143                         | Listeria_monocytogenes_1639_v128 | 0.9537 |
| Listeria_monocytogenes_1639_v142                         | Listeria_monocytogenes_1639_v128 | 0.9676 |
| Listeria_monocytogenes_1639_v141                         | Listeria_monocytogenes_1639_v128 | 0.995  |
| Listeria_monocytogenes_1639_v140                         | Listeria_monocytogenes_1639_v128 | 0.9684 |
| Listeria_monocytogenes_1639_v13                          | Listeria_monocytogenes_1639_v128 | 0.9349 |
| Listeria_monocytogenes_1639_v139                         | Listeria_monocytogenes_1639_v128 | 0.9634 |
| Listeria_monocytogenes_1639_v138                         | Listeria_monocytogenes_1639_v128 | 0.9707 |
| Listeria_monocytogenes_1639_v137                         | Listeria_monocytogenes_1639_v128 | 0.9707 |
| Listeria_monocytogenes_1639_v136                         | Listeria_monocytogenes_1639_v128 | 0.9458 |
| Listeria_monocytogenes_1639_v135                         | Listeria_monocytogenes_1639_v128 | 0.919  |
| Listeria_monocytogenes_1639_v134                         | Listeria_monocytogenes_1639_v128 | 0.9624 |
| Listeria_monocytogenes_1639_v133                         | Listeria_monocytogenes_1639_v128 | 0.9448 |
| Listeria_monocytogenes_1639_v132                         | Listeria_monocytogenes_1639_v128 | 0.9199 |
| Listeria_monocytogenes_1639_v131                         | Listeria_monocytogenes_1639_v128 | 0.9558 |
| Listeria_monocytogenes_1639_v130                         | Listeria_monocytogenes_1639_v128 | 0.9388 |
| Listeria_monocytogenes_1639_v12                          | Listeria_monocytogenes_1639_v128 | 0.9195 |
| Listeria_monocytogenes_1639_v129                         | Listeria_monocytogenes_1639_v128 | 0.9784 |
| Listeria_monocytogenes_1639_v128                         | Listeria_monocytogenes_1639_v128 | 0.0657 |
| Listeria_welshimeri_1643                                 | Listeria_monocytogenes_1639_v129 | 0.8813 |
| Listeria_welshimeri_serovar_6b_str_SLCC5334_386043       | Listeria_monocytogenes_1639_v129 | 0.8809 |
| Listeria_seeligeri_serovar_1_2b_str_SLCC3954_683837      | Listeria_monocytogenes_1639_v129 | 0.8948 |
| Listeria_seeligeri_FSL_S4-171_702452                     | Listeria_monocytogenes_1639_v129 | 0.8286 |
| Listeria_seeligeri_FSL_N1-067_702453                     | Listeria_monocytogenes_1639_v129 | 0.836  |
| Listeria_seeligeri_1640_v1                               | Listeria_monocytogenes_1639_v129 | 0.8978 |
| Listeria_seeligeri_1640                                  | Listeria_monocytogenes_1639_v129 | 0.8854 |
| Listeria_monocytogenes_WSLC1042_1457188                  | Listeria_monocytogenes_1639_v129 | 0.9628 |
| Listeria_monocytogenes_WSLC1001_1457187                  | Listeria_monocytogenes_1639_v129 | 0.9408 |
| Listeria_monocytogenes_SLCC7179_879090                   | Listeria_monocytogenes_1639_v129 | 0.9488 |
| Listeria_monocytogenes_SLCC5850_882096                   | Listeria_monocytogenes_1639_v129 | 0.9456 |
| Listeria_monocytogenes_SLCC2755_932919                   | Listeria_monocytogenes_1639_v129 | 0.9521 |
| Listeria_monocytogenes_SLCC2540_879089                   | Listeria_monocytogenes_1639_v129 | 0.963  |
| Listeria_monocytogenes_SLCC2479_882020                   | Listeria_monocytogenes_1639_v129 | 0.9416 |
| Listeria_monocytogenes_SLCC2378_879088                   | Listeria_monocytogenes_1639_v129 | 0.9639 |
| Listeria_monocytogenes_SLCC2376_882097                   | Listeria_monocytogenes_1639_v129 | 0.9496 |
| Listeria_monocytogenes_SLCC2372_932920                   | Listeria_monocytogenes_1639_v129 | 0.9342 |
| Listeria_monocytogenes_serotype_4b_str_LL195_1230340     | Listeria_monocytogenes_1639_v129 | 0.9679 |
| Listeria_monocytogenes_serotype_4b_str_LIS0087_1134669   | Listeria_monocytogenes_1639_v129 | 0.923  |
| Listeria_monocytogenes_serotype_4b_str_F2365_265669      | Listeria_monocytogenes_1639_v129 | 0.9679 |
| Listeria_monocytogenes_serotype_4b_str_CLIP_80459_568819 | Listeria_monocytogenes_1639_v129 | 0.9687 |
| Listeria_monocytogenes_serotype_4b_str_81-0861_1196161   | Listeria_monocytogenes_1639_v129 | 0.9526 |
| Listeria_monocytogenes_serotype_4b_str_81-0592_1196160   | Listeria_monocytogenes_1639_v129 | 0.9537 |
| Listeria_monocytogenes_serotype_4b_str_81-0558_1196159   | Listeria_monocytogenes_1639_v129 | 0.9529 |
| Listeria_monocytogenes_serotype_4b_str_10-0809_1196162   | Listeria_monocytogenes_1639_v129 | 0.954  |
| Listeria_monocytogenes_serotype_4b_str_02-6680_1196175   | Listeria_monocytogenes_1639_v129 | 0.9641 |

|                                                          |                                  |        |
|----------------------------------------------------------|----------------------------------|--------|
| Listeria_monocytogenes_serotype_4b_str_02-6679_1196174   | Listeria_monocytogenes_1639_v129 | 0.9641 |
| Listeria_monocytogenes_serotype_4b_str_02-1792_1196173   | Listeria_monocytogenes_1639_v129 | 0.9544 |
| Listeria_monocytogenes_serotype_4b_str_02-1289_1196172   | Listeria_monocytogenes_1639_v129 | 0.9544 |
| Listeria_monocytogenes_serotype_4b_str_02-1103_1196171   | Listeria_monocytogenes_1639_v129 | 0.9544 |
| Listeria_monocytogenes_serotype_3c_str_10-5027_1196195   | Listeria_monocytogenes_1639_v129 | 0.9408 |
| Listeria_monocytogenes_serotype_1_2c_str_10-5026_1196194 | Listeria_monocytogenes_1639_v129 | 0.9416 |
| Listeria_monocytogenes_serotype_1_2c_str_10-5025_1196193 | Listeria_monocytogenes_1639_v129 | 0.9416 |
| Listeria_monocytogenes_serotype_1_2b_str_10-0811_1196164 | Listeria_monocytogenes_1639_v129 | 0.9668 |
| Listeria_monocytogenes_serotype_1_2b_str_10-0810_1196163 | Listeria_monocytogenes_1639_v129 | 0.9668 |
| Listeria_monocytogenes_serotype_1_2a_str_99-6370_1196179 | Listeria_monocytogenes_1639_v129 | 0.9267 |
| Listeria_monocytogenes_serotype_1_2a_str_98-2035_1196178 | Listeria_monocytogenes_1639_v129 | 0.9267 |
| Listeria_monocytogenes_serotype_1_2a_str_95-0093_1196177 | Listeria_monocytogenes_1639_v129 | 0.9322 |
| Listeria_monocytogenes_serotype_1_2a_str_88-0478_1196176 | Listeria_monocytogenes_1639_v129 | 0.9311 |
| Listeria_monocytogenes_serotype_1_2a_str_10-5024_1196192 | Listeria_monocytogenes_1639_v129 | 0.9322 |
| Listeria_monocytogenes_serotype_1_2a_str_10-4758_1196168 | Listeria_monocytogenes_1639_v129 | 0.9495 |
| Listeria_monocytogenes_serotype_1_2a_str_10-4754_1196167 | Listeria_monocytogenes_1639_v129 | 0.9498 |
| Listeria_monocytogenes_serotype_1_2a_str_10-1321_1196191 | Listeria_monocytogenes_1639_v129 | 0.9322 |
| Listeria_monocytogenes_serotype_1_2a_str_10-1047_1196190 | Listeria_monocytogenes_1639_v129 | 0.9329 |
| Listeria_monocytogenes_serotype_1_2a_str_10-1046_1196189 | Listeria_monocytogenes_1639_v129 | 0.9329 |
| Listeria_monocytogenes_serotype_1_2a_str_10-0934_1196170 | Listeria_monocytogenes_1639_v129 | 0.9593 |
| Listeria_monocytogenes_serotype_1_2a_str_10-0933_1196169 | Listeria_monocytogenes_1639_v129 | 0.9593 |
| Listeria_monocytogenes_serotype_1_2a_str_10-0815_1196188 | Listeria_monocytogenes_1639_v129 | 0.9281 |
| Listeria_monocytogenes_serotype_1_2a_str_10-0814_1196187 | Listeria_monocytogenes_1639_v129 | 0.9326 |
| Listeria_monocytogenes_serotype_1_2a_str_10-0813_1196166 | Listeria_monocytogenes_1639_v129 | 0.9387 |
| Listeria_monocytogenes_serotype_1_2a_str_10-0812_1196165 | Listeria_monocytogenes_1639_v129 | 0.9387 |
| Listeria_monocytogenes_serotype_1_2a_str_08-7669_1196186 | Listeria_monocytogenes_1639_v129 | 0.9422 |
| Listeria_monocytogenes_serotype_1_2a_str_08-7374_1196185 | Listeria_monocytogenes_1639_v129 | 0.9322 |
| Listeria_monocytogenes_serotype_1_2a_str_08-6997_1196184 | Listeria_monocytogenes_1639_v129 | 0.9281 |
| Listeria_monocytogenes_serotype_1_2a_str_08-6569_1196183 | Listeria_monocytogenes_1639_v129 | 0.9281 |
| Listeria_monocytogenes_serotype_1_2a_str_08-6056_1196182 | Listeria_monocytogenes_1639_v129 | 0.9281 |
| Listeria_monocytogenes_serotype_1_2a_str_04-5457_1196181 | Listeria_monocytogenes_1639_v129 | 0.9322 |
| Listeria_monocytogenes_serotype_1_2a_str_02-5993_1196180 | Listeria_monocytogenes_1639_v129 | 0.9322 |
| Listeria_monocytogenes_R479a_1437838                     | Listeria_monocytogenes_1639_v129 | 0.9312 |
| Listeria_monocytogenes_N53-1_1234142                     | Listeria_monocytogenes_1639_v129 | 0.9039 |
| Listeria_monocytogenes_M7_1030009                        | Listeria_monocytogenes_1639_v129 | 0.9098 |
| Listeria_monocytogenes_LO28_393132                       | Listeria_monocytogenes_1639_v129 | 0.9402 |
| Listeria_monocytogenes_L99_563174                        | Listeria_monocytogenes_1639_v129 | 0.9101 |
| Listeria_monocytogenes_L312_882094                       | Listeria_monocytogenes_1639_v129 | 0.9691 |
| Listeria_monocytogenes_J1816_930781                      | Listeria_monocytogenes_1639_v129 | 0.9482 |
| Listeria_monocytogenes_J1-220_930782                     | Listeria_monocytogenes_1639_v129 | 0.9454 |
| Listeria_monocytogenes_J0161_393130                      | Listeria_monocytogenes_1639_v129 | 0.9383 |
| Listeria_monocytogenes_HCC23_552536                      | Listeria_monocytogenes_1639_v129 | 0.9094 |
| Listeria_monocytogenes_FSL_R2-561_393126                 | Listeria_monocytogenes_1639_v129 | 0.9402 |
| Listeria_monocytogenes_FSL_J1-208_393119                 | Listeria_monocytogenes_1639_v129 | 0.9171 |
| Listeria_monocytogenes_FSL_J1-175_393118                 | Listeria_monocytogenes_1639_v129 | 0.9663 |
| Listeria_monocytogenes_Finland_1998_393127               | Listeria_monocytogenes_1639_v129 | 0.9589 |
| Listeria_monocytogenes_EGD-e_169963_v1                   | Listeria_monocytogenes_1639_v129 | 0.9556 |
| Listeria_monocytogenes_EGD-e_169963                      | Listeria_monocytogenes_1639_v129 | 0.956  |
| Listeria_monocytogenes_EGD_1334565                       | Listeria_monocytogenes_1639_v129 | 0.9463 |
| Listeria_monocytogenes_CFSAN002349_1299895               | Listeria_monocytogenes_1639_v129 | 0.9703 |
| Listeria_monocytogenes_ATCC_19117_882095_v1              | Listeria_monocytogenes_1639_v129 | 0.965  |
| Listeria_monocytogenes_ATCC_19117_882095                 | Listeria_monocytogenes_1639_v129 | 0.9646 |
| Listeria_monocytogenes_6179_1288295                      | Listeria_monocytogenes_1639_v129 | 0.9213 |
| Listeria_monocytogenes_1639_v9                           | Listeria_monocytogenes_1639_v129 | 0.9371 |
| Listeria_monocytogenes_1639_v99                          | Listeria_monocytogenes_1639_v129 | 0.949  |
| Listeria_monocytogenes_1639_v98                          | Listeria_monocytogenes_1639_v129 | 0.9352 |
| Listeria_monocytogenes_1639_v97                          | Listeria_monocytogenes_1639_v129 | 0.9543 |
| Listeria_monocytogenes_1639_v96                          | Listeria_monocytogenes_1639_v129 | 0.9482 |
| Listeria_monocytogenes_1639_v95                          | Listeria_monocytogenes_1639_v129 | 0.9483 |
| Listeria_monocytogenes_1639_v94                          | Listeria_monocytogenes_1639_v129 | 0.9486 |
| Listeria_monocytogenes_1639_v93                          | Listeria_monocytogenes_1639_v129 | 0.9363 |
| Listeria_monocytogenes_1639_v92                          | Listeria_monocytogenes_1639_v129 | 0.949  |
| Listeria_monocytogenes_1639_v91                          | Listeria_monocytogenes_1639_v129 | 0.9481 |
| Listeria_monocytogenes_1639_v90                          | Listeria_monocytogenes_1639_v129 | 0.9352 |
| Listeria_monocytogenes_1639_v8                           | Listeria_monocytogenes_1639_v129 | 0.9204 |
| Listeria_monocytogenes_1639_v89                          | Listeria_monocytogenes_1639_v129 | 0.9598 |
| Listeria_monocytogenes_1639_v88                          | Listeria_monocytogenes_1639_v129 | 0.9392 |
| Listeria_monocytogenes_1639_v87                          | Listeria_monocytogenes_1639_v129 | 0.9345 |
| Listeria_monocytogenes_1639_v86                          | Listeria_monocytogenes_1639_v129 | 0.9341 |
| Listeria_monocytogenes_1639_v85                          | Listeria_monocytogenes_1639_v129 | 0.9522 |
| Listeria_monocytogenes_1639_v84                          | Listeria_monocytogenes_1639_v129 | 0.9398 |
| Listeria_monocytogenes_1639_v83                          | Listeria_monocytogenes_1639_v129 | 0.954  |
| Listeria_monocytogenes_1639_v82                          | Listeria_monocytogenes_1639_v129 | 0.9536 |
| Listeria_monocytogenes_1639_v81                          | Listeria_monocytogenes_1639_v129 | 0.9392 |
| Listeria_monocytogenes_1639_v80                          | Listeria_monocytogenes_1639_v129 | 0.9722 |
| Listeria_monocytogenes_1639_v7                           | Listeria_monocytogenes_1639_v129 | 0.9204 |
| Listeria_monocytogenes_1639_v79                          | Listeria_monocytogenes_1639_v129 | 0.9374 |
| Listeria_monocytogenes_1639_v78                          | Listeria_monocytogenes_1639_v129 | 0.9385 |
| Listeria_monocytogenes_1639_v77                          | Listeria_monocytogenes_1639_v129 | 0.9436 |
| Listeria_monocytogenes_1639_v76                          | Listeria_monocytogenes_1639_v129 | 0.9333 |
| Listeria_monocytogenes_1639_v75                          | Listeria_monocytogenes_1639_v129 | 0.9101 |
| Listeria_monocytogenes_1639_v74                          | Listeria_monocytogenes_1639_v129 | 0.933  |
| Listeria_monocytogenes_1639_v73                          | Listeria_monocytogenes_1639_v129 | 0.9356 |
| Listeria_monocytogenes_1639_v72                          | Listeria_monocytogenes_1639_v129 | 0.952  |
| Listeria_monocytogenes_1639_v71                          | Listeria_monocytogenes_1639_v129 | 0.9215 |
| Listeria_monocytogenes_1639_v70                          | Listeria_monocytogenes_1639_v129 | 0.9377 |
| Listeria_monocytogenes_1639_v6                           | Listeria_monocytogenes_1639_v129 | 0.9201 |
| Listeria_monocytogenes_1639_v69                          | Listeria_monocytogenes_1639_v129 | 0.9537 |
| Listeria_monocytogenes_1639_v68                          | Listeria_monocytogenes_1639_v129 | 0.9433 |
| Listeria_monocytogenes_1639_v67                          | Listeria_monocytogenes_1639_v129 | 0.9559 |
| Listeria_monocytogenes_1639_v66                          | Listeria_monocytogenes_1639_v129 | 0.943  |



[illegible]

|                                                          |                                  |        |
|----------------------------------------------------------|----------------------------------|--------|
| Listeria_monocytogenes_1639_v162                         | Listeria_monocytogenes_1639_v129 | 0.9675 |
| Listeria_monocytogenes_1639_v161                         | Listeria_monocytogenes_1639_v129 | 0.9675 |
| Listeria_monocytogenes_1639_v160                         | Listeria_monocytogenes_1639_v129 | 0.9672 |
| Listeria_monocytogenes_1639_v15                          | Listeria_monocytogenes_1639_v129 | 0.9521 |
| Listeria_monocytogenes_1639_v159                         | Listeria_monocytogenes_1639_v129 | 0.9684 |
| Listeria_monocytogenes_1639_v158                         | Listeria_monocytogenes_1639_v129 | 0.9679 |
| Listeria_monocytogenes_1639_v157                         | Listeria_monocytogenes_1639_v129 | 0.9679 |
| Listeria_monocytogenes_1639_v156                         | Listeria_monocytogenes_1639_v129 | 0.9351 |
| Listeria_monocytogenes_1639_v155                         | Listeria_monocytogenes_1639_v129 | 0.9477 |
| Listeria_monocytogenes_1639_v154                         | Listeria_monocytogenes_1639_v129 | 0.9508 |
| Listeria_monocytogenes_1639_v153                         | Listeria_monocytogenes_1639_v129 | 0.9488 |
| Listeria_monocytogenes_1639_v152                         | Listeria_monocytogenes_1639_v129 | 0.9684 |
| Listeria_monocytogenes_1639_v151                         | Listeria_monocytogenes_1639_v129 | 0.9684 |
| Listeria_monocytogenes_1639_v150                         | Listeria_monocytogenes_1639_v129 | 0.9481 |
| Listeria_monocytogenes_1639_v14                          | Listeria_monocytogenes_1639_v129 | 0.9589 |
| Listeria_monocytogenes_1639_v149                         | Listeria_monocytogenes_1639_v129 | 0.9467 |
| Listeria_monocytogenes_1639_v148                         | Listeria_monocytogenes_1639_v129 | 0.9676 |
| Listeria_monocytogenes_1639_v147                         | Listeria_monocytogenes_1639_v129 | 0.9533 |
| Listeria_monocytogenes_1639_v146                         | Listeria_monocytogenes_1639_v129 | 0.9616 |
| Listeria_monocytogenes_1639_v145                         | Listeria_monocytogenes_1639_v129 | 0.9544 |
| Listeria_monocytogenes_1639_v144                         | Listeria_monocytogenes_1639_v129 | 0.9683 |
| Listeria_monocytogenes_1639_v143                         | Listeria_monocytogenes_1639_v129 | 0.9609 |
| Listeria_monocytogenes_1639_v142                         | Listeria_monocytogenes_1639_v129 | 0.9687 |
| Listeria_monocytogenes_1639_v141                         | Listeria_monocytogenes_1639_v129 | 0.9744 |
| Listeria_monocytogenes_1639_v140                         | Listeria_monocytogenes_1639_v129 | 0.9694 |
| Listeria_monocytogenes_1639_v13                          | Listeria_monocytogenes_1639_v129 | 0.9517 |
| Listeria_monocytogenes_1639_v139                         | Listeria_monocytogenes_1639_v129 | 0.9652 |
| Listeria_monocytogenes_1639_v138                         | Listeria_monocytogenes_1639_v129 | 0.9706 |
| Listeria_monocytogenes_1639_v137                         | Listeria_monocytogenes_1639_v129 | 0.9706 |
| Listeria_monocytogenes_1639_v136                         | Listeria_monocytogenes_1639_v129 | 0.9491 |
| Listeria_monocytogenes_1639_v135                         | Listeria_monocytogenes_1639_v129 | 0.923  |
| Listeria_monocytogenes_1639_v134                         | Listeria_monocytogenes_1639_v129 | 0.9638 |
| Listeria_monocytogenes_1639_v133                         | Listeria_monocytogenes_1639_v129 | 0.9501 |
| Listeria_monocytogenes_1639_v132                         | Listeria_monocytogenes_1639_v129 | 0.9212 |
| Listeria_monocytogenes_1639_v131                         | Listeria_monocytogenes_1639_v129 | 0.9569 |
| Listeria_monocytogenes_1639_v130                         | Listeria_monocytogenes_1639_v129 | 0.9413 |
| Listeria_monocytogenes_1639_v12                          | Listeria_monocytogenes_1639_v129 | 0.9211 |
| Listeria_monocytogenes_1639_v129                         | Listeria_monocytogenes_1639_v129 | 0.0661 |
| Listeria_welshimeri_1643                                 | Listeria_monocytogenes_1639_v12  | 0.8533 |
| Listeria_welshimeri_serovar_6b_str_SLCC5334_386043       | Listeria_monocytogenes_1639_v12  | 0.853  |
| Listeria_seeligeri_serovar_1_2b_str_SLCC3954_683837      | Listeria_monocytogenes_1639_v12  | 0.8577 |
| Listeria_seeligeri_FSL_S4-171_702452                     | Listeria_monocytogenes_1639_v12  | 0.8011 |
| Listeria_seeligeri_FSL_N1-067_702453                     | Listeria_monocytogenes_1639_v12  | 0.8233 |
| Listeria_seeligeri_1640_v1                               | Listeria_monocytogenes_1639_v12  | 0.8605 |
| Listeria_seeligeri_1640                                  | Listeria_monocytogenes_1639_v12  | 0.8532 |
| Listeria_monocytogenes_WSLC1042_1457188                  | Listeria_monocytogenes_1639_v12  | 0.9056 |
| Listeria_monocytogenes_WSLC1001_1457187                  | Listeria_monocytogenes_1639_v12  | 0.9378 |
| Listeria_monocytogenes_SLCC7179_879090                   | Listeria_monocytogenes_1639_v12  | 0.9291 |
| Listeria_monocytogenes_SLCC5850_882096                   | Listeria_monocytogenes_1639_v12  | 0.9353 |
| Listeria_monocytogenes_SLCC2755_932919                   | Listeria_monocytogenes_1639_v12  | 0.9322 |
| Listeria_monocytogenes_SLCC2540_879089                   | Listeria_monocytogenes_1639_v12  | 0.9239 |
| Listeria_monocytogenes_SLCC2479_882020                   | Listeria_monocytogenes_1639_v12  | 0.9706 |
| Listeria_monocytogenes_SLCC2378_879088                   | Listeria_monocytogenes_1639_v12  | 0.9066 |
| Listeria_monocytogenes_SLCC2376_882097                   | Listeria_monocytogenes_1639_v12  | 0.9113 |
| Listeria_monocytogenes_SLCC2372_932920                   | Listeria_monocytogenes_1639_v12  | 0.9726 |
| Listeria_monocytogenes_serotype_4b_str_LL195_1230340     | Listeria_monocytogenes_1639_v12  | 0.9104 |
| Listeria_monocytogenes_serotype_4b_str_LIS0087_1134669   | Listeria_monocytogenes_1639_v12  | 0.9155 |
| Listeria_monocytogenes_serotype_4b_str_F2365_265669      | Listeria_monocytogenes_1639_v12  | 0.9104 |
| Listeria_monocytogenes_serotype_4b_str_CLIP_80459_568819 | Listeria_monocytogenes_1639_v12  | 0.9129 |
| Listeria_monocytogenes_serotype_4b_str_81-0861_1196161   | Listeria_monocytogenes_1639_v12  | 0.9021 |
| Listeria_monocytogenes_serotype_4b_str_81-0592_1196160   | Listeria_monocytogenes_1639_v12  | 0.9031 |
| Listeria_monocytogenes_serotype_4b_str_81-0558_1196159   | Listeria_monocytogenes_1639_v12  | 0.9035 |
| Listeria_monocytogenes_serotype_4b_str_10-0809_1196162   | Listeria_monocytogenes_1639_v12  | 0.9031 |
| Listeria_monocytogenes_serotype_4b_str_02-6680_1196175   | Listeria_monocytogenes_1639_v12  | 0.9105 |
| Listeria_monocytogenes_serotype_4b_str_02-6679_1196174   | Listeria_monocytogenes_1639_v12  | 0.9105 |
| Listeria_monocytogenes_serotype_4b_str_02-1792_1196173   | Listeria_monocytogenes_1639_v12  | 0.9053 |
| Listeria_monocytogenes_serotype_4b_str_02-1289_1196172   | Listeria_monocytogenes_1639_v12  | 0.9053 |
| Listeria_monocytogenes_serotype_4b_str_02-1103_1196171   | Listeria_monocytogenes_1639_v12  | 0.9053 |
| Listeria_monocytogenes_serotype_3c_str_10-5027_1196195   | Listeria_monocytogenes_1639_v12  | 0.9669 |
| Listeria_monocytogenes_serotype_1_2c_str_10-5026_1196194 | Listeria_monocytogenes_1639_v12  | 0.968  |
| Listeria_monocytogenes_serotype_1_2c_str_10-5025_1196193 | Listeria_monocytogenes_1639_v12  | 0.968  |
| Listeria_monocytogenes_serotype_1_2b_str_10-0811_1196164 | Listeria_monocytogenes_1639_v12  | 0.9301 |
| Listeria_monocytogenes_serotype_1_2b_str_10-0810_1196163 | Listeria_monocytogenes_1639_v12  | 0.9301 |
| Listeria_monocytogenes_serotype_1_2a_str_99-6370_1196179 | Listeria_monocytogenes_1639_v12  | 0.9397 |
| Listeria_monocytogenes_serotype_1_2a_str_98-2035_1196178 | Listeria_monocytogenes_1639_v12  | 0.9397 |
| Listeria_monocytogenes_serotype_1_2a_str_95-0093_1196177 | Listeria_monocytogenes_1639_v12  | 0.9346 |
| Listeria_monocytogenes_serotype_1_2a_str_88-0478_1196176 | Listeria_monocytogenes_1639_v12  | 0.9368 |
| Listeria_monocytogenes_serotype_1_2a_str_10-5024_1196192 | Listeria_monocytogenes_1639_v12  | 0.935  |
| Listeria_monocytogenes_serotype_1_2a_str_10-4758_1196168 | Listeria_monocytogenes_1639_v12  | 0.938  |
| Listeria_monocytogenes_serotype_1_2a_str_10-4754_1196167 | Listeria_monocytogenes_1639_v12  | 0.9383 |
| Listeria_monocytogenes_serotype_1_2a_str_10-1321_1196191 | Listeria_monocytogenes_1639_v12  | 0.935  |
| Listeria_monocytogenes_serotype_1_2a_str_10-1047_1196190 | Listeria_monocytogenes_1639_v12  | 0.9346 |
| Listeria_monocytogenes_serotype_1_2a_str_10-1046_1196189 | Listeria_monocytogenes_1639_v12  | 0.9346 |
| Listeria_monocytogenes_serotype_1_2a_str_10-0934_1196170 | Listeria_monocytogenes_1639_v12  | 0.9349 |
| Listeria_monocytogenes_serotype_1_2a_str_10-0933_1196169 | Listeria_monocytogenes_1639_v12  | 0.9349 |
| Listeria_monocytogenes_serotype_1_2a_str_10-0815_1196188 | Listeria_monocytogenes_1639_v12  | 0.9385 |
| Listeria_monocytogenes_serotype_1_2a_str_10-0814_1196187 | Listeria_monocytogenes_1639_v12  | 0.9354 |
| Listeria_monocytogenes_serotype_1_2a_str_10-0813_1196166 | Listeria_monocytogenes_1639_v12  | 0.9365 |
| Listeria_monocytogenes_serotype_1_2a_str_10-0812_1196165 | Listeria_monocytogenes_1639_v12  | 0.9365 |
| Listeria_monocytogenes_serotype_1_2a_str_08-7669_1196186 | Listeria_monocytogenes_1639_v12  | 0.9292 |
| Listeria_monocytogenes_serotype_1_2a_str_08-7374_1196185 | Listeria_monocytogenes_1639_v12  | 0.935  |

|                                                          |                                 |        |
|----------------------------------------------------------|---------------------------------|--------|
| Listeria_monocytogenes_serotype_1_2a_str_08-6997_1196184 | Listeria_monocytogenes_1639_v12 | 0.9385 |
| Listeria_monocytogenes_serotype_1_2a_str_08-6569_1196183 | Listeria_monocytogenes_1639_v12 | 0.9385 |
| Listeria_monocytogenes_serotype_1_2a_str_08-6056_1196182 | Listeria_monocytogenes_1639_v12 | 0.9385 |
| Listeria_monocytogenes_serotype_1_2a_str_04-5457_1196181 | Listeria_monocytogenes_1639_v12 | 0.935  |
| Listeria_monocytogenes_serotype_1_2a_str_02-5993_1196180 | Listeria_monocytogenes_1639_v12 | 0.935  |
| Listeria_monocytogenes_R479a_1437838                     | Listeria_monocytogenes_1639_v12 | 0.943  |
| Listeria_monocytogenes_N53-1_1234142                     | Listeria_monocytogenes_1639_v12 | 0.8872 |
| Listeria_monocytogenes_M7_1030009                        | Listeria_monocytogenes_1639_v12 | 0.8947 |
| Listeria_monocytogenes_LO28_393132                       | Listeria_monocytogenes_1639_v12 | 0.9626 |
| Listeria_monocytogenes_L99_563174                        | Listeria_monocytogenes_1639_v12 | 0.895  |
| Listeria_monocytogenes_L312_882094                       | Listeria_monocytogenes_1639_v12 | 0.9129 |
| Listeria_monocytogenes_J1816_930781                      | Listeria_monocytogenes_1639_v12 | 0.9061 |
| Listeria_monocytogenes_J1-220_930782                     | Listeria_monocytogenes_1639_v12 | 0.9075 |
| Listeria_monocytogenes_J0161_393130                      | Listeria_monocytogenes_1639_v12 | 0.926  |
| Listeria_monocytogenes_HCC23_552536                      | Listeria_monocytogenes_1639_v12 | 0.8947 |
| Listeria_monocytogenes_FSL_R2-561_393126                 | Listeria_monocytogenes_1639_v12 | 0.9677 |
| Listeria_monocytogenes_FSL_J1-208_393119                 | Listeria_monocytogenes_1639_v12 | 0.8786 |
| Listeria_monocytogenes_FSL_J1-175_393118                 | Listeria_monocytogenes_1639_v12 | 0.9239 |
| Listeria_monocytogenes_Finland_1998_393127               | Listeria_monocytogenes_1639_v12 | 0.9286 |
| Listeria_monocytogenes_EGD-e_169963_v1                   | Listeria_monocytogenes_1639_v12 | 0.9494 |
| Listeria_monocytogenes_EGD-e_169963                      | Listeria_monocytogenes_1639_v12 | 0.9498 |
| Listeria_monocytogenes_EGD_1334565                       | Listeria_monocytogenes_1639_v12 | 0.936  |
| Listeria_monocytogenes_CFSAN002349_1299895               | Listeria_monocytogenes_1639_v12 | 0.9136 |
| Listeria_monocytogenes_ATCC_19117_882095_v1              | Listeria_monocytogenes_1639_v12 | 0.9078 |
| Listeria_monocytogenes_ATCC_19117_882095                 | Listeria_monocytogenes_1639_v12 | 0.9074 |
| Listeria_monocytogenes_6179_1288295                      | Listeria_monocytogenes_1639_v12 | 0.9334 |
| Listeria_monocytogenes_1639_v9                           | Listeria_monocytogenes_1639_v12 | 0.9129 |
| Listeria_monocytogenes_1639_v99                          | Listeria_monocytogenes_1639_v12 | 0.9155 |
| Listeria_monocytogenes_1639_v98                          | Listeria_monocytogenes_1639_v12 | 0.936  |
| Listeria_monocytogenes_1639_v97                          | Listeria_monocytogenes_1639_v12 | 0.9094 |
| Listeria_monocytogenes_1639_v96                          | Listeria_monocytogenes_1639_v12 | 0.9152 |
| Listeria_monocytogenes_1639_v95                          | Listeria_monocytogenes_1639_v12 | 0.9152 |
| Listeria_monocytogenes_1639_v94                          | Listeria_monocytogenes_1639_v12 | 0.9155 |
| Listeria_monocytogenes_1639_v93                          | Listeria_monocytogenes_1639_v12 | 0.9324 |
| Listeria_monocytogenes_1639_v92                          | Listeria_monocytogenes_1639_v12 | 0.9159 |
| Listeria_monocytogenes_1639_v91                          | Listeria_monocytogenes_1639_v12 | 0.9099 |
| Listeria_monocytogenes_1639_v90                          | Listeria_monocytogenes_1639_v12 | 0.936  |
| Listeria_monocytogenes_1639_v8                           | Listeria_monocytogenes_1639_v12 | 0.9522 |
| Listeria_monocytogenes_1639_v89                          | Listeria_monocytogenes_1639_v12 | 0.9108 |
| Listeria_monocytogenes_1639_v88                          | Listeria_monocytogenes_1639_v12 | 0.9413 |
| Listeria_monocytogenes_1639_v87                          | Listeria_monocytogenes_1639_v12 | 0.9339 |
| Listeria_monocytogenes_1639_v86                          | Listeria_monocytogenes_1639_v12 | 0.9336 |
| Listeria_monocytogenes_1639_v85                          | Listeria_monocytogenes_1639_v12 | 0.9026 |
| Listeria_monocytogenes_1639_v84                          | Listeria_monocytogenes_1639_v12 | 0.9397 |
| Listeria_monocytogenes_1639_v83                          | Listeria_monocytogenes_1639_v12 | 0.9037 |
| Listeria_monocytogenes_1639_v82                          | Listeria_monocytogenes_1639_v12 | 0.9034 |
| Listeria_monocytogenes_1639_v81                          | Listeria_monocytogenes_1639_v12 | 0.9402 |
| Listeria_monocytogenes_1639_v80                          | Listeria_monocytogenes_1639_v12 | 0.9237 |
| Listeria_monocytogenes_1639_v7                           | Listeria_monocytogenes_1639_v12 | 0.9522 |
| Listeria_monocytogenes_1639_v79                          | Listeria_monocytogenes_1639_v12 | 0.9345 |
| Listeria_monocytogenes_1639_v78                          | Listeria_monocytogenes_1639_v12 | 0.9392 |
| Listeria_monocytogenes_1639_v77                          | Listeria_monocytogenes_1639_v12 | 0.9283 |
| Listeria_monocytogenes_1639_v76                          | Listeria_monocytogenes_1639_v12 | 0.9421 |
| Listeria_monocytogenes_1639_v75                          | Listeria_monocytogenes_1639_v12 | 0.895  |
| Listeria_monocytogenes_1639_v74                          | Listeria_monocytogenes_1639_v12 | 0.9252 |
| Listeria_monocytogenes_1639_v73                          | Listeria_monocytogenes_1639_v12 | 0.9711 |
| Listeria_monocytogenes_1639_v72                          | Listeria_monocytogenes_1639_v12 | 0.9022 |
| Listeria_monocytogenes_1639_v71                          | Listeria_monocytogenes_1639_v12 | 0.9254 |
| Listeria_monocytogenes_1639_v70                          | Listeria_monocytogenes_1639_v12 | 0.9725 |
| Listeria_monocytogenes_1639_v6                           | Listeria_monocytogenes_1639_v12 | 0.9518 |
| Listeria_monocytogenes_1639_v69                          | Listeria_monocytogenes_1639_v12 | 0.9031 |
| Listeria_monocytogenes_1639_v68                          | Listeria_monocytogenes_1639_v12 | 0.9256 |
| Listeria_monocytogenes_1639_v67                          | Listeria_monocytogenes_1639_v12 | 0.9271 |
| Listeria_monocytogenes_1639_v66                          | Listeria_monocytogenes_1639_v12 | 0.938  |
| Listeria_monocytogenes_1639_v65                          | Listeria_monocytogenes_1639_v12 | 0.941  |
| Listeria_monocytogenes_1639_v64                          | Listeria_monocytogenes_1639_v12 | 0.9396 |
| Listeria_monocytogenes_1639_v63                          | Listeria_monocytogenes_1639_v12 | 0.9322 |
| Listeria_monocytogenes_1639_v62                          | Listeria_monocytogenes_1639_v12 | 0.9438 |
| Listeria_monocytogenes_1639_v61                          | Listeria_monocytogenes_1639_v12 | 0.9366 |
| Listeria_monocytogenes_1639_v60                          | Listeria_monocytogenes_1639_v12 | 0.9278 |
| Listeria_monocytogenes_1639_v5                           | Listeria_monocytogenes_1639_v12 | 0.9142 |
| Listeria_monocytogenes_1639_v59                          | Listeria_monocytogenes_1639_v12 | 0.9088 |
| Listeria_monocytogenes_1639_v58                          | Listeria_monocytogenes_1639_v12 | 0.9084 |
| Listeria_monocytogenes_1639_v57                          | Listeria_monocytogenes_1639_v12 | 0.904  |
| Listeria_monocytogenes_1639_v56                          | Listeria_monocytogenes_1639_v12 | 0.9092 |
| Listeria_monocytogenes_1639_v55                          | Listeria_monocytogenes_1639_v12 | 0.909  |
| Listeria_monocytogenes_1639_v54                          | Listeria_monocytogenes_1639_v12 | 0.903  |
| Listeria_monocytogenes_1639_v53                          | Listeria_monocytogenes_1639_v12 | 0.919  |
| Listeria_monocytogenes_1639_v52                          | Listeria_monocytogenes_1639_v12 | 0.908  |
| Listeria_monocytogenes_1639_v51                          | Listeria_monocytogenes_1639_v12 | 0.9057 |
| Listeria_monocytogenes_1639_v50                          | Listeria_monocytogenes_1639_v12 | 0.9339 |
| Listeria_monocytogenes_1639_v4                           | Listeria_monocytogenes_1639_v12 | 0.926  |
| Listeria_monocytogenes_1639_v49                          | Listeria_monocytogenes_1639_v12 | 0.9036 |
| Listeria_monocytogenes_1639_v48                          | Listeria_monocytogenes_1639_v12 | 0.9707 |
| Listeria_monocytogenes_1639_v47                          | Listeria_monocytogenes_1639_v12 | 0.9347 |
| Listeria_monocytogenes_1639_v46                          | Listeria_monocytogenes_1639_v12 | 0.9275 |
| Listeria_monocytogenes_1639_v45                          | Listeria_monocytogenes_1639_v12 | 0.9346 |
| Listeria_monocytogenes_1639_v44                          | Listeria_monocytogenes_1639_v12 | 0.935  |
| Listeria_monocytogenes_1639_v43                          | Listeria_monocytogenes_1639_v12 | 0.935  |
| Listeria_monocytogenes_1639_v42                          | Listeria_monocytogenes_1639_v12 | 0.9274 |
| Listeria_monocytogenes_1639_v41                          | Listeria_monocytogenes_1639_v12 | 0.9254 |

[illegible]

|                                                          |                                  |        |
|----------------------------------------------------------|----------------------------------|--------|
| Listeria_monocytogenes_1639_v138                         | Listeria_monocytogenes_1639_v12  | 0.9148 |
| Listeria_monocytogenes_1639_v137                         | Listeria_monocytogenes_1639_v12  | 0.9144 |
| Listeria_monocytogenes_1639_v136                         | Listeria_monocytogenes_1639_v12  | 0.9391 |
| Listeria_monocytogenes_1639_v135                         | Listeria_monocytogenes_1639_v12  | 0.89   |
| Listeria_monocytogenes_1639_v134                         | Listeria_monocytogenes_1639_v12  | 0.9063 |
| Listeria_monocytogenes_1639_v133                         | Listeria_monocytogenes_1639_v12  | 0.9341 |
| Listeria_monocytogenes_1639_v132                         | Listeria_monocytogenes_1639_v12  | 0.8884 |
| Listeria_monocytogenes_1639_v131                         | Listeria_monocytogenes_1639_v12  | 0.9089 |
| Listeria_monocytogenes_1639_v130                         | Listeria_monocytogenes_1639_v12  | 0.9666 |
| Listeria_monocytogenes_1639_v12                          | Listeria_monocytogenes_1639_v12  | 0.0743 |
| Listeria_welshimeri_1643                                 | Listeria_monocytogenes_1639_v130 | 0.8681 |
| Listeria_welshimeri_serovar_6b_str_SLCC5334_386043       | Listeria_monocytogenes_1639_v130 | 0.8674 |
| Listeria_seeligeri_serovar_1_2b_str_SLCC3954_683837      | Listeria_monocytogenes_1639_v130 | 0.8747 |
| Listeria_seeligeri_FSL_S4-171_702452                     | Listeria_monocytogenes_1639_v130 | 0.8103 |
| Listeria_seeligeri_FSL_N1-067_702453                     | Listeria_monocytogenes_1639_v130 | 0.8291 |
| Listeria_seeligeri_1640_v1                               | Listeria_monocytogenes_1639_v130 | 0.8805 |
| Listeria_seeligeri_1640                                  | Listeria_monocytogenes_1639_v130 | 0.8682 |
| Listeria_monocytogenes_WSLC1042_1457188                  | Listeria_monocytogenes_1639_v130 | 0.9256 |
| Listeria_monocytogenes_WSLC1001_1457187                  | Listeria_monocytogenes_1639_v130 | 0.9615 |
| Listeria_monocytogenes_SLCC7179_879090                   | Listeria_monocytogenes_1639_v130 | 0.9479 |
| Listeria_monocytogenes_SLCC5850_882096                   | Listeria_monocytogenes_1639_v130 | 0.9545 |
| Listeria_monocytogenes_SLCC2755_932919                   | Listeria_monocytogenes_1639_v130 | 0.9389 |
| Listeria_monocytogenes_SLCC2540_879089                   | Listeria_monocytogenes_1639_v130 | 0.9427 |
| Listeria_monocytogenes_SLCC2479_882020                   | Listeria_monocytogenes_1639_v130 | 0.981  |
| Listeria_monocytogenes_SLCC2378_879088                   | Listeria_monocytogenes_1639_v130 | 0.927  |
| Listeria_monocytogenes_SLCC2376_882097                   | Listeria_monocytogenes_1639_v130 | 0.9319 |
| Listeria_monocytogenes_SLCC2372_932920                   | Listeria_monocytogenes_1639_v130 | 0.9904 |
| Listeria_monocytogenes_serotype_4b_str_LL195_1230340     | Listeria_monocytogenes_1639_v130 | 0.9311 |
| Listeria_monocytogenes_serotype_4b_str_LIS0087_1134669   | Listeria_monocytogenes_1639_v130 | 0.9352 |
| Listeria_monocytogenes_serotype_4b_str_F2365_265669      | Listeria_monocytogenes_1639_v130 | 0.9311 |
| Listeria_monocytogenes_serotype_4b_str_CLIP_80459_568819 | Listeria_monocytogenes_1639_v130 | 0.9337 |
| Listeria_monocytogenes_serotype_4b_str_81-0861_1196161   | Listeria_monocytogenes_1639_v130 | 0.9182 |
| Listeria_monocytogenes_serotype_4b_str_81-0592_1196160   | Listeria_monocytogenes_1639_v130 | 0.9192 |
| Listeria_monocytogenes_serotype_4b_str_81-0558_1196159   | Listeria_monocytogenes_1639_v130 | 0.9199 |
| Listeria_monocytogenes_serotype_4b_str_10-0809_1196162   | Listeria_monocytogenes_1639_v130 | 0.9192 |
| Listeria_monocytogenes_serotype_4b_str_02-6680_1196175   | Listeria_monocytogenes_1639_v130 | 0.9304 |
| Listeria_monocytogenes_serotype_4b_str_02-6679_1196174   | Listeria_monocytogenes_1639_v130 | 0.9304 |
| Listeria_monocytogenes_serotype_4b_str_02-1792_1196173   | Listeria_monocytogenes_1639_v130 | 0.9203 |
| Listeria_monocytogenes_serotype_4b_str_02-1289_1196172   | Listeria_monocytogenes_1639_v130 | 0.9203 |
| Listeria_monocytogenes_serotype_4b_str_02-1103_1196171   | Listeria_monocytogenes_1639_v130 | 0.9203 |
| Listeria_monocytogenes_serotype_3c_str_10-5027_1196195   | Listeria_monocytogenes_1639_v130 | 0.9721 |
| Listeria_monocytogenes_serotype_1_2c_str_10-5026_1196194 | Listeria_monocytogenes_1639_v130 | 0.9732 |
| Listeria_monocytogenes_serotype_1_2c_str_10-5025_1196193 | Listeria_monocytogenes_1639_v130 | 0.9732 |
| Listeria_monocytogenes_serotype_1_2b_str_10-0811_1196164 | Listeria_monocytogenes_1639_v130 | 0.933  |
| Listeria_monocytogenes_serotype_1_2b_str_10-0810_1196163 | Listeria_monocytogenes_1639_v130 | 0.933  |
| Listeria_monocytogenes_serotype_1_2a_str_99-6370_1196179 | Listeria_monocytogenes_1639_v130 | 0.9347 |
| Listeria_monocytogenes_serotype_1_2a_str_98-2035_1196178 | Listeria_monocytogenes_1639_v130 | 0.9347 |
| Listeria_monocytogenes_serotype_1_2a_str_95-0093_1196177 | Listeria_monocytogenes_1639_v130 | 0.9402 |
| Listeria_monocytogenes_serotype_1_2a_str_88-0478_1196176 | Listeria_monocytogenes_1639_v130 | 0.9416 |
| Listeria_monocytogenes_serotype_1_2a_str_10-5024_1196192 | Listeria_monocytogenes_1639_v130 | 0.9405 |
| Listeria_monocytogenes_serotype_1_2a_str_10-4758_1196168 | Listeria_monocytogenes_1639_v130 | 0.9583 |
| Listeria_monocytogenes_serotype_1_2a_str_10-4754_1196167 | Listeria_monocytogenes_1639_v130 | 0.9583 |
| Listeria_monocytogenes_serotype_1_2a_str_10-1321_1196191 | Listeria_monocytogenes_1639_v130 | 0.9405 |
| Listeria_monocytogenes_serotype_1_2a_str_10-1047_1196190 | Listeria_monocytogenes_1639_v130 | 0.9405 |
| Listeria_monocytogenes_serotype_1_2a_str_10-1046_1196189 | Listeria_monocytogenes_1639_v130 | 0.9405 |
| Listeria_monocytogenes_serotype_1_2a_str_10-0934_1196170 | Listeria_monocytogenes_1639_v130 | 0.9559 |
| Listeria_monocytogenes_serotype_1_2a_str_10-0933_1196169 | Listeria_monocytogenes_1639_v130 | 0.9559 |
| Listeria_monocytogenes_serotype_1_2a_str_10-0815_1196188 | Listeria_monocytogenes_1639_v130 | 0.9357 |
| Listeria_monocytogenes_serotype_1_2a_str_10-0814_1196187 | Listeria_monocytogenes_1639_v130 | 0.9402 |
| Listeria_monocytogenes_serotype_1_2a_str_10-0813_1196166 | Listeria_monocytogenes_1639_v130 | 0.9493 |
| Listeria_monocytogenes_serotype_1_2a_str_10-0812_1196165 | Listeria_monocytogenes_1639_v130 | 0.9493 |
| Listeria_monocytogenes_serotype_1_2a_str_08-7669_1196186 | Listeria_monocytogenes_1639_v130 | 0.937  |
| Listeria_monocytogenes_serotype_1_2a_str_08-7374_1196185 | Listeria_monocytogenes_1639_v130 | 0.9405 |
| Listeria_monocytogenes_serotype_1_2a_str_08-6997_1196184 | Listeria_monocytogenes_1639_v130 | 0.9357 |
| Listeria_monocytogenes_serotype_1_2a_str_08-6569_1196183 | Listeria_monocytogenes_1639_v130 | 0.9357 |
| Listeria_monocytogenes_serotype_1_2a_str_08-6056_1196182 | Listeria_monocytogenes_1639_v130 | 0.9357 |
| Listeria_monocytogenes_serotype_1_2a_str_04-5457_1196181 | Listeria_monocytogenes_1639_v130 | 0.9405 |
| Listeria_monocytogenes_serotype_1_2a_str_02-5993_1196180 | Listeria_monocytogenes_1639_v130 | 0.9402 |
| Listeria_monocytogenes_R479a_1437838                     | Listeria_monocytogenes_1639_v130 | 0.9465 |
| Listeria_monocytogenes_N53-1_1234142                     | Listeria_monocytogenes_1639_v130 | 0.9032 |
| Listeria_monocytogenes_M7_1030009                        | Listeria_monocytogenes_1639_v130 | 0.9038 |
| Listeria_monocytogenes_LO28_393132                       | Listeria_monocytogenes_1639_v130 | 0.9796 |
| Listeria_monocytogenes_L99_563174                        | Listeria_monocytogenes_1639_v130 | 0.9045 |
| Listeria_monocytogenes_L312_882094                       | Listeria_monocytogenes_1639_v130 | 0.9337 |
| Listeria_monocytogenes_J1816_930781                      | Listeria_monocytogenes_1639_v130 | 0.9162 |
| Listeria_monocytogenes_J1-220_930782                     | Listeria_monocytogenes_1639_v130 | 0.9158 |
| Listeria_monocytogenes_J0161_393130                      | Listeria_monocytogenes_1639_v130 | 0.9362 |
| Listeria_monocytogenes_HCC23_552536                      | Listeria_monocytogenes_1639_v130 | 0.9041 |
| Listeria_monocytogenes_FSL_R2-561_393126                 | Listeria_monocytogenes_1639_v130 | 0.9714 |
| Listeria_monocytogenes_FSL_J1-208_393119                 | Listeria_monocytogenes_1639_v130 | 0.8977 |
| Listeria_monocytogenes_FSL_J1-175_393118                 | Listeria_monocytogenes_1639_v130 | 0.9421 |
| Listeria_monocytogenes_Finland_1998_393127               | Listeria_monocytogenes_1639_v130 | 0.9502 |
| Listeria_monocytogenes_EGD-e_169963_v1                   | Listeria_monocytogenes_1639_v130 | 0.9644 |
| Listeria_monocytogenes_EGD-e_169963                      | Listeria_monocytogenes_1639_v130 | 0.9644 |
| Listeria_monocytogenes_EGD_1334565                       | Listeria_monocytogenes_1639_v130 | 0.9552 |
| Listeria_monocytogenes_CFSAN002349_1299895               | Listeria_monocytogenes_1639_v130 | 0.9339 |
| Listeria_monocytogenes_ATCC_19117_882095_v1              | Listeria_monocytogenes_1639_v130 | 0.9268 |
| Listeria_monocytogenes_ATCC_19117_882095                 | Listeria_monocytogenes_1639_v130 | 0.9268 |
| Listeria_monocytogenes_6179_1288295                      | Listeria_monocytogenes_1639_v130 | 0.9429 |
| Listeria_monocytogenes_1639_v9                           | Listeria_monocytogenes_1639_v130 | 0.9168 |
| Listeria_monocytogenes_1639_v99                          | Listeria_monocytogenes_1639_v130 | 0.9258 |

[illegible]





|                                                          |                                  |        |
|----------------------------------------------------------|----------------------------------|--------|
| Listeria_monocytogenes_serotype_4b_str_F2365_265669      | Listeria_monocytogenes_1639_v131 | 0.9634 |
| Listeria_monocytogenes_serotype_4b_str_CLIP_80459_568819 | Listeria_monocytogenes_1639_v131 | 0.9652 |
| Listeria_monocytogenes_serotype_4b_str_81-0861_1196161   | Listeria_monocytogenes_1639_v131 | 0.9576 |
| Listeria_monocytogenes_serotype_4b_str_81-0592_1196160   | Listeria_monocytogenes_1639_v131 | 0.9587 |
| Listeria_monocytogenes_serotype_4b_str_81-0558_1196159   | Listeria_monocytogenes_1639_v131 | 0.9587 |
| Listeria_monocytogenes_serotype_4b_str_10-0809_1196162   | Listeria_monocytogenes_1639_v131 | 0.9591 |
| Listeria_monocytogenes_serotype_4b_str_02-6680_1196175   | Listeria_monocytogenes_1639_v131 | 0.9623 |
| Listeria_monocytogenes_serotype_4b_str_02-6679_1196174   | Listeria_monocytogenes_1639_v131 | 0.9623 |
| Listeria_monocytogenes_serotype_4b_str_02-1792_1196173   | Listeria_monocytogenes_1639_v131 | 0.9606 |
| Listeria_monocytogenes_serotype_4b_str_02-1289_1196172   | Listeria_monocytogenes_1639_v131 | 0.9606 |
| Listeria_monocytogenes_serotype_4b_str_02-1103_1196171   | Listeria_monocytogenes_1639_v131 | 0.9606 |
| Listeria_monocytogenes_serotype_3c_str_10-5027_1196195   | Listeria_monocytogenes_1639_v131 | 0.9273 |
| Listeria_monocytogenes_serotype_1_2c_str_10-5026_1196194 | Listeria_monocytogenes_1639_v131 | 0.9277 |
| Listeria_monocytogenes_serotype_1_2c_str_10-5025_1196193 | Listeria_monocytogenes_1639_v131 | 0.9277 |
| Listeria_monocytogenes_serotype_1_2b_str_10-0811_1196164 | Listeria_monocytogenes_1639_v131 | 0.9463 |
| Listeria_monocytogenes_serotype_1_2b_str_10-0810_1196163 | Listeria_monocytogenes_1639_v131 | 0.9463 |
| Listeria_monocytogenes_serotype_1_2a_str_99-6370_1196179 | Listeria_monocytogenes_1639_v131 | 0.9187 |
| Listeria_monocytogenes_serotype_1_2a_str_98-2035_1196178 | Listeria_monocytogenes_1639_v131 | 0.9187 |
| Listeria_monocytogenes_serotype_1_2a_str_95-0093_1196177 | Listeria_monocytogenes_1639_v131 | 0.923  |
| Listeria_monocytogenes_serotype_1_2a_str_88-0478_1196176 | Listeria_monocytogenes_1639_v131 | 0.9226 |
| Listeria_monocytogenes_serotype_1_2a_str_10-5024_1196192 | Listeria_monocytogenes_1639_v131 | 0.9234 |
| Listeria_monocytogenes_serotype_1_2a_str_10-4758_1196168 | Listeria_monocytogenes_1639_v131 | 0.9338 |
| Listeria_monocytogenes_serotype_1_2a_str_10-4754_1196167 | Listeria_monocytogenes_1639_v131 | 0.9334 |
| Listeria_monocytogenes_serotype_1_2a_str_10-1321_1196191 | Listeria_monocytogenes_1639_v131 | 0.9234 |
| Listeria_monocytogenes_serotype_1_2a_str_10-1047_1196190 | Listeria_monocytogenes_1639_v131 | 0.9237 |
| Listeria_monocytogenes_serotype_1_2a_str_10-1046_1196189 | Listeria_monocytogenes_1639_v131 | 0.9237 |
| Listeria_monocytogenes_serotype_1_2a_str_10-0934_1196170 | Listeria_monocytogenes_1639_v131 | 0.9402 |
| Listeria_monocytogenes_serotype_1_2a_str_10-0933_1196169 | Listeria_monocytogenes_1639_v131 | 0.9402 |
| Listeria_monocytogenes_serotype_1_2a_str_10-0815_1196188 | Listeria_monocytogenes_1639_v131 | 0.9193 |
| Listeria_monocytogenes_serotype_1_2a_str_10-0814_1196187 | Listeria_monocytogenes_1639_v131 | 0.9234 |
| Listeria_monocytogenes_serotype_1_2a_str_10-0813_1196166 | Listeria_monocytogenes_1639_v131 | 0.9357 |
| Listeria_monocytogenes_serotype_1_2a_str_10-0812_1196165 | Listeria_monocytogenes_1639_v131 | 0.9357 |
| Listeria_monocytogenes_serotype_1_2a_str_08-7669_1196186 | Listeria_monocytogenes_1639_v131 | 0.9316 |
| Listeria_monocytogenes_serotype_1_2a_str_08-7374_1196185 | Listeria_monocytogenes_1639_v131 | 0.9234 |
| Listeria_monocytogenes_serotype_1_2a_str_08-6997_1196184 | Listeria_monocytogenes_1639_v131 | 0.9193 |
| Listeria_monocytogenes_serotype_1_2a_str_08-6569_1196183 | Listeria_monocytogenes_1639_v131 | 0.9193 |
| Listeria_monocytogenes_serotype_1_2a_str_08-6056_1196182 | Listeria_monocytogenes_1639_v131 | 0.9193 |
| Listeria_monocytogenes_serotype_1_2a_str_04-5457_1196181 | Listeria_monocytogenes_1639_v131 | 0.9234 |
| Listeria_monocytogenes_serotype_1_2a_str_02-5993_1196180 | Listeria_monocytogenes_1639_v131 | 0.923  |
| Listeria_monocytogenes_R479a_1437838                     | Listeria_monocytogenes_1639_v131 | 0.9201 |
| Listeria_monocytogenes_N53-1_1234142                     | Listeria_monocytogenes_1639_v131 | 0.8919 |
| Listeria_monocytogenes_M7_1030009                        | Listeria_monocytogenes_1639_v131 | 0.9131 |
| Listeria_monocytogenes_LO28_393132                       | Listeria_monocytogenes_1639_v131 | 0.932  |
| Listeria_monocytogenes_L99_563174                        | Listeria_monocytogenes_1639_v131 | 0.9138 |
| Listeria_monocytogenes_L312_882094                       | Listeria_monocytogenes_1639_v131 | 0.9656 |
| Listeria_monocytogenes_J1816_930781                      | Listeria_monocytogenes_1639_v131 | 0.9723 |
| Listeria_monocytogenes_J1-220_930782                     | Listeria_monocytogenes_1639_v131 | 0.9527 |
| Listeria_monocytogenes_J0161_393130                      | Listeria_monocytogenes_1639_v131 | 0.9323 |
| Listeria_monocytogenes_HCC23_552536                      | Listeria_monocytogenes_1639_v131 | 0.9131 |
| Listeria_monocytogenes_FSL_R2-561_393126                 | Listeria_monocytogenes_1639_v131 | 0.9267 |
| Listeria_monocytogenes_FSL_J1-208_393119                 | Listeria_monocytogenes_1639_v131 | 0.9091 |
| Listeria_monocytogenes_FSL_J1-175_393118                 | Listeria_monocytogenes_1639_v131 | 0.9477 |
| Listeria_monocytogenes_Finland_1998_393127               | Listeria_monocytogenes_1639_v131 | 0.9414 |
| Listeria_monocytogenes_EGD-e_169963_v1                   | Listeria_monocytogenes_1639_v131 | 0.9426 |
| Listeria_monocytogenes_EGD-e_169963                      | Listeria_monocytogenes_1639_v131 | 0.943  |
| Listeria_monocytogenes_EGD_1334565                       | Listeria_monocytogenes_1639_v131 | 0.9348 |
| Listeria_monocytogenes_CFSAN002349_1299895               | Listeria_monocytogenes_1639_v131 | 0.9703 |
| Listeria_monocytogenes_ATCC_19117_882095_v1              | Listeria_monocytogenes_1639_v131 | 0.9586 |
| Listeria_monocytogenes_ATCC_19117_882095                 | Listeria_monocytogenes_1639_v131 | 0.9586 |
| Listeria_monocytogenes_6179_1288295                      | Listeria_monocytogenes_1639_v131 | 0.9181 |
| Listeria_monocytogenes_1639_v9                           | Listeria_monocytogenes_1639_v131 | 0.9309 |
| Listeria_monocytogenes_1639_v99                          | Listeria_monocytogenes_1639_v131 | 0.9772 |
| Listeria_monocytogenes_1639_v98                          | Listeria_monocytogenes_1639_v131 | 0.9341 |
| Listeria_monocytogenes_1639_v97                          | Listeria_monocytogenes_1639_v131 | 0.962  |
| Listeria_monocytogenes_1639_v96                          | Listeria_monocytogenes_1639_v131 | 0.9735 |
| Listeria_monocytogenes_1639_v95                          | Listeria_monocytogenes_1639_v131 | 0.9735 |
| Listeria_monocytogenes_1639_v94                          | Listeria_monocytogenes_1639_v131 | 0.9739 |
| Listeria_monocytogenes_1639_v93                          | Listeria_monocytogenes_1639_v131 | 0.9185 |
| Listeria_monocytogenes_1639_v92                          | Listeria_monocytogenes_1639_v131 | 0.9802 |
| Listeria_monocytogenes_1639_v91                          | Listeria_monocytogenes_1639_v131 | 0.9581 |
| Listeria_monocytogenes_1639_v90                          | Listeria_monocytogenes_1639_v131 | 0.9341 |
| Listeria_monocytogenes_1639_v8                           | Listeria_monocytogenes_1639_v131 | 0.91   |
| Listeria_monocytogenes_1639_v89                          | Listeria_monocytogenes_1639_v131 | 0.9773 |
| Listeria_monocytogenes_1639_v88                          | Listeria_monocytogenes_1639_v131 | 0.9279 |
| Listeria_monocytogenes_1639_v87                          | Listeria_monocytogenes_1639_v131 | 0.9312 |
| Listeria_monocytogenes_1639_v86                          | Listeria_monocytogenes_1639_v131 | 0.9305 |
| Listeria_monocytogenes_1639_v85                          | Listeria_monocytogenes_1639_v131 | 0.9573 |
| Listeria_monocytogenes_1639_v84                          | Listeria_monocytogenes_1639_v131 | 0.9338 |
| Listeria_monocytogenes_1639_v83                          | Listeria_monocytogenes_1639_v131 | 0.9576 |
| Listeria_monocytogenes_1639_v82                          | Listeria_monocytogenes_1639_v131 | 0.9568 |
| Listeria_monocytogenes_1639_v81                          | Listeria_monocytogenes_1639_v131 | 0.9302 |
| Listeria_monocytogenes_1639_v80                          | Listeria_monocytogenes_1639_v131 | 0.9503 |
| Listeria_monocytogenes_1639_v7                           | Listeria_monocytogenes_1639_v131 | 0.91   |
| Listeria_monocytogenes_1639_v79                          | Listeria_monocytogenes_1639_v131 | 0.9281 |
| Listeria_monocytogenes_1639_v78                          | Listeria_monocytogenes_1639_v131 | 0.9291 |
| Listeria_monocytogenes_1639_v77                          | Listeria_monocytogenes_1639_v131 | 0.9284 |
| Listeria_monocytogenes_1639_v76                          | Listeria_monocytogenes_1639_v131 | 0.9222 |
| Listeria_monocytogenes_1639_v75                          | Listeria_monocytogenes_1639_v131 | 0.9138 |
| Listeria_monocytogenes_1639_v74                          | Listeria_monocytogenes_1639_v131 | 0.9275 |
| Listeria_monocytogenes_1639_v73                          | Listeria_monocytogenes_1639_v131 | 0.9271 |
| Listeria_monocytogenes_1639_v72                          | Listeria_monocytogenes_1639_v131 | 0.9601 |

[illegible]

|                                                          |                                  |        |
|----------------------------------------------------------|----------------------------------|--------|
| Listeria_monocytogenes_1639_v169                         | Listeria_monocytogenes_1639_v131 | 0.938  |
| Listeria_monocytogenes_1639_v168                         | Listeria_monocytogenes_1639_v131 | 0.9403 |
| Listeria_monocytogenes_1639_v167                         | Listeria_monocytogenes_1639_v131 | 0.9314 |
| Listeria_monocytogenes_1639_v166                         | Listeria_monocytogenes_1639_v131 | 0.9406 |
| Listeria_monocytogenes_1639_v165                         | Listeria_monocytogenes_1639_v131 | 0.9376 |
| Listeria_monocytogenes_1639_v164                         | Listeria_monocytogenes_1639_v131 | 0.9626 |
| Listeria_monocytogenes_1639_v163                         | Listeria_monocytogenes_1639_v131 | 0.9535 |
| Listeria_monocytogenes_1639_v162                         | Listeria_monocytogenes_1639_v131 | 0.9626 |
| Listeria_monocytogenes_1639_v161                         | Listeria_monocytogenes_1639_v131 | 0.9633 |
| Listeria_monocytogenes_1639_v160                         | Listeria_monocytogenes_1639_v131 | 0.963  |
| Listeria_monocytogenes_1639_v15                          | Listeria_monocytogenes_1639_v131 | 0.9325 |
| Listeria_monocytogenes_1639_v159                         | Listeria_monocytogenes_1639_v131 | 0.9871 |
| Listeria_monocytogenes_1639_v158                         | Listeria_monocytogenes_1639_v131 | 0.9634 |
| Listeria_monocytogenes_1639_v157                         | Listeria_monocytogenes_1639_v131 | 0.9634 |
| Listeria_monocytogenes_1639_v156                         | Listeria_monocytogenes_1639_v131 | 0.9296 |
| Listeria_monocytogenes_1639_v155                         | Listeria_monocytogenes_1639_v131 | 0.9385 |
| Listeria_monocytogenes_1639_v154                         | Listeria_monocytogenes_1639_v131 | 0.9362 |
| Listeria_monocytogenes_1639_v153                         | Listeria_monocytogenes_1639_v131 | 0.9426 |
| Listeria_monocytogenes_1639_v152                         | Listeria_monocytogenes_1639_v131 | 0.9874 |
| Listeria_monocytogenes_1639_v151                         | Listeria_monocytogenes_1639_v131 | 0.9874 |
| Listeria_monocytogenes_1639_v150                         | Listeria_monocytogenes_1639_v131 | 0.9347 |
| Listeria_monocytogenes_1639_v14                          | Listeria_monocytogenes_1639_v131 | 0.9383 |
| Listeria_monocytogenes_1639_v149                         | Listeria_monocytogenes_1639_v131 | 0.9348 |
| Listeria_monocytogenes_1639_v148                         | Listeria_monocytogenes_1639_v131 | 0.9859 |
| Listeria_monocytogenes_1639_v147                         | Listeria_monocytogenes_1639_v131 | 0.9715 |
| Listeria_monocytogenes_1639_v146                         | Listeria_monocytogenes_1639_v131 | 0.9384 |
| Listeria_monocytogenes_1639_v145                         | Listeria_monocytogenes_1639_v131 | 0.9336 |
| Listeria_monocytogenes_1639_v144                         | Listeria_monocytogenes_1639_v131 | 0.9649 |
| Listeria_monocytogenes_1639_v143                         | Listeria_monocytogenes_1639_v131 | 0.9404 |
| Listeria_monocytogenes_1639_v142                         | Listeria_monocytogenes_1639_v131 | 0.9653 |
| Listeria_monocytogenes_1639_v141                         | Listeria_monocytogenes_1639_v131 | 0.9602 |
| Listeria_monocytogenes_1639_v140                         | Listeria_monocytogenes_1639_v131 | 0.9656 |
| Listeria_monocytogenes_1639_v13                          | Listeria_monocytogenes_1639_v131 | 0.9329 |
| Listeria_monocytogenes_1639_v139                         | Listeria_monocytogenes_1639_v131 | 0.9649 |
| Listeria_monocytogenes_1639_v138                         | Listeria_monocytogenes_1639_v131 | 0.9679 |
| Listeria_monocytogenes_1639_v137                         | Listeria_monocytogenes_1639_v131 | 0.9676 |
| Listeria_monocytogenes_1639_v136                         | Listeria_monocytogenes_1639_v131 | 0.9335 |
| Listeria_monocytogenes_1639_v135                         | Listeria_monocytogenes_1639_v131 | 0.9239 |
| Listeria_monocytogenes_1639_v134                         | Listeria_monocytogenes_1639_v131 | 0.959  |
| Listeria_monocytogenes_1639_v133                         | Listeria_monocytogenes_1639_v131 | 0.9325 |
| Listeria_monocytogenes_1639_v132                         | Listeria_monocytogenes_1639_v131 | 0.9243 |
| Listeria_monocytogenes_1639_v131                         | Listeria_monocytogenes_1639_v131 | 0.0653 |
| Listeria_welshimeri_1643                                 | Listeria_monocytogenes_1639_v132 | 0.8684 |
| Listeria_welshimeri_serovar_6b_str_SLCC5334_386043       | Listeria_monocytogenes_1639_v132 | 0.8678 |
| Listeria_seeligeri_serovar_1_2b_str_SLCC3954_683837      | Listeria_monocytogenes_1639_v132 | 0.8712 |
| Listeria_seeligeri_FSL_S4-171_702452                     | Listeria_monocytogenes_1639_v132 | 0.8192 |
| Listeria_seeligeri_FSL_N1-067_702453                     | Listeria_monocytogenes_1639_v132 | 0.8174 |
| Listeria_seeligeri_1640_v1                               | Listeria_monocytogenes_1639_v132 | 0.8717 |
| Listeria_seeligeri_1640                                  | Listeria_monocytogenes_1639_v132 | 0.879  |
| Listeria_monocytogenes_WSLC1042_1457188                  | Listeria_monocytogenes_1639_v132 | 0.9166 |
| Listeria_monocytogenes_WSLC1001_1457187                  | Listeria_monocytogenes_1639_v132 | 0.9086 |
| Listeria_monocytogenes_SLCC7179_879090                   | Listeria_monocytogenes_1639_v132 | 0.9226 |
| Listeria_monocytogenes_SLCC5850_882096                   | Listeria_monocytogenes_1639_v132 | 0.9124 |
| Listeria_monocytogenes_SLCC2755_932919                   | Listeria_monocytogenes_1639_v132 | 0.9094 |
| Listeria_monocytogenes_SLCC2540_879089                   | Listeria_monocytogenes_1639_v132 | 0.9116 |
| Listeria_monocytogenes_SLCC2479_882020                   | Listeria_monocytogenes_1639_v132 | 0.9059 |
| Listeria_monocytogenes_SLCC2378_879088                   | Listeria_monocytogenes_1639_v132 | 0.918  |
| Listeria_monocytogenes_SLCC2376_882097                   | Listeria_monocytogenes_1639_v132 | 0.9383 |
| Listeria_monocytogenes_SLCC2372_932920                   | Listeria_monocytogenes_1639_v132 | 0.9    |
| Listeria_monocytogenes_serotype_4b_str_LL195_1230340     | Listeria_monocytogenes_1639_v132 | 0.9231 |
| Listeria_monocytogenes_serotype_4b_str_LIS0087_1134669   | Listeria_monocytogenes_1639_v132 | 0.8968 |
| Listeria_monocytogenes_serotype_4b_str_F2365_265669      | Listeria_monocytogenes_1639_v132 | 0.9231 |
| Listeria_monocytogenes_serotype_4b_str_CLIP_80459_568819 | Listeria_monocytogenes_1639_v132 | 0.9283 |
| Listeria_monocytogenes_serotype_4b_str_81-0861_1196161   | Listeria_monocytogenes_1639_v132 | 0.9207 |
| Listeria_monocytogenes_serotype_4b_str_81-0592_1196160   | Listeria_monocytogenes_1639_v132 | 0.9218 |
| Listeria_monocytogenes_serotype_4b_str_81-0558_1196159   | Listeria_monocytogenes_1639_v132 | 0.9225 |
| Listeria_monocytogenes_serotype_4b_str_10-0809_1196162   | Listeria_monocytogenes_1639_v132 | 0.9218 |
| Listeria_monocytogenes_serotype_4b_str_02-6680_1196175   | Listeria_monocytogenes_1639_v132 | 0.9266 |
| Listeria_monocytogenes_serotype_4b_str_02-6679_1196174   | Listeria_monocytogenes_1639_v132 | 0.9266 |
| Listeria_monocytogenes_serotype_4b_str_02-1792_1196173   | Listeria_monocytogenes_1639_v132 | 0.9225 |
| Listeria_monocytogenes_serotype_4b_str_02-1289_1196172   | Listeria_monocytogenes_1639_v132 | 0.9225 |
| Listeria_monocytogenes_serotype_4b_str_02-1103_1196171   | Listeria_monocytogenes_1639_v132 | 0.9225 |
| Listeria_monocytogenes_serotype_3c_str_10-5027_1196195   | Listeria_monocytogenes_1639_v132 | 0.9059 |
| Listeria_monocytogenes_serotype_1_2c_str_10-5026_1196194 | Listeria_monocytogenes_1639_v132 | 0.907  |
| Listeria_monocytogenes_serotype_1_2c_str_10-5025_1196193 | Listeria_monocytogenes_1639_v132 | 0.907  |
| Listeria_monocytogenes_serotype_1_2b_str_10-0811_1196164 | Listeria_monocytogenes_1639_v132 | 0.9119 |
| Listeria_monocytogenes_serotype_1_2b_str_10-0810_1196163 | Listeria_monocytogenes_1639_v132 | 0.9119 |
| Listeria_monocytogenes_serotype_1_2a_str_99-6370_1196179 | Listeria_monocytogenes_1639_v132 | 0.8939 |
| Listeria_monocytogenes_serotype_1_2a_str_98-2035_1196178 | Listeria_monocytogenes_1639_v132 | 0.8939 |
| Listeria_monocytogenes_serotype_1_2a_str_95-0093_1196177 | Listeria_monocytogenes_1639_v132 | 0.8984 |
| Listeria_monocytogenes_serotype_1_2a_str_88-0478_1196176 | Listeria_monocytogenes_1639_v132 | 0.8987 |
| Listeria_monocytogenes_serotype_1_2a_str_10-5024_1196192 | Listeria_monocytogenes_1639_v132 | 0.8988 |
| Listeria_monocytogenes_serotype_1_2a_str_10-4758_1196168 | Listeria_monocytogenes_1639_v132 | 0.9133 |
| Listeria_monocytogenes_serotype_1_2a_str_10-4754_1196167 | Listeria_monocytogenes_1639_v132 | 0.9133 |
| Listeria_monocytogenes_serotype_1_2a_str_10-1321_1196191 | Listeria_monocytogenes_1639_v132 | 0.8988 |
| Listeria_monocytogenes_serotype_1_2a_str_10-1047_1196190 | Listeria_monocytogenes_1639_v132 | 0.8999 |
| Listeria_monocytogenes_serotype_1_2a_str_10-1046_1196189 | Listeria_monocytogenes_1639_v132 | 0.8999 |
| Listeria_monocytogenes_serotype_1_2a_str_10-0934_1196170 | Listeria_monocytogenes_1639_v132 | 0.9201 |
| Listeria_monocytogenes_serotype_1_2a_str_10-0933_1196169 | Listeria_monocytogenes_1639_v132 | 0.9201 |
| Listeria_monocytogenes_serotype_1_2a_str_10-0815_1196188 | Listeria_monocytogenes_1639_v132 | 0.8945 |
| Listeria_monocytogenes_serotype_1_2a_str_10-0814_1196187 | Listeria_monocytogenes_1639_v132 | 0.8984 |

|                                                          |                                  |        |
|----------------------------------------------------------|----------------------------------|--------|
| Listeria_monocytogenes_serotype_1_2a_str_10-0813_1196166 | Listeria_monocytogenes_1639_v132 | 0.916  |
| Listeria_monocytogenes_serotype_1_2a_str_10-0812_1196165 | Listeria_monocytogenes_1639_v132 | 0.916  |
| Listeria_monocytogenes_serotype_1_2a_str_08-7669_1196186 | Listeria_monocytogenes_1639_v132 | 0.9071 |
| Listeria_monocytogenes_serotype_1_2a_str_08-7374_1196185 | Listeria_monocytogenes_1639_v132 | 0.8988 |
| Listeria_monocytogenes_serotype_1_2a_str_08-6997_1196184 | Listeria_monocytogenes_1639_v132 | 0.8945 |
| Listeria_monocytogenes_serotype_1_2a_str_08-6569_1196183 | Listeria_monocytogenes_1639_v132 | 0.8945 |
| Listeria_monocytogenes_serotype_1_2a_str_08-6056_1196182 | Listeria_monocytogenes_1639_v132 | 0.8945 |
| Listeria_monocytogenes_serotype_1_2a_str_04-5457_1196181 | Listeria_monocytogenes_1639_v132 | 0.8988 |
| Listeria_monocytogenes_serotype_1_2a_str_02-5993_1196180 | Listeria_monocytogenes_1639_v132 | 0.8984 |
| Listeria_monocytogenes_R479a_1437838                     | Listeria_monocytogenes_1639_v132 | 0.9004 |
| Listeria_monocytogenes_N53-1_1234142                     | Listeria_monocytogenes_1639_v132 | 0.8749 |
| Listeria_monocytogenes_M7_1030009                        | Listeria_monocytogenes_1639_v132 | 0.9244 |
| Listeria_monocytogenes_LO28_393132                       | Listeria_monocytogenes_1639_v132 | 0.9098 |
| Listeria_monocytogenes_L99_563174                        | Listeria_monocytogenes_1639_v132 | 0.9251 |
| Listeria_monocytogenes_L312_882094                       | Listeria_monocytogenes_1639_v132 | 0.9283 |
| Listeria_monocytogenes_J1816_930781                      | Listeria_monocytogenes_1639_v132 | 0.9106 |
| Listeria_monocytogenes_J1-220_930782                     | Listeria_monocytogenes_1639_v132 | 0.9172 |
| Listeria_monocytogenes_J0161_393130                      | Listeria_monocytogenes_1639_v132 | 0.9165 |
| Listeria_monocytogenes_HCC23_552536                      | Listeria_monocytogenes_1639_v132 | 0.9248 |
| Listeria_monocytogenes_FSL_R2-561_393126                 | Listeria_monocytogenes_1639_v132 | 0.9053 |
| Listeria_monocytogenes_FSL_J1-208_393119                 | Listeria_monocytogenes_1639_v132 | 0.9142 |
| Listeria_monocytogenes_FSL_J1-175_393118                 | Listeria_monocytogenes_1639_v132 | 0.9128 |
| Listeria_monocytogenes_Finland_1998_393127               | Listeria_monocytogenes_1639_v132 | 0.9193 |
| Listeria_monocytogenes_EGD-e_169963_v1                   | Listeria_monocytogenes_1639_v132 | 0.922  |
| Listeria_monocytogenes_EGD-e_169963                      | Listeria_monocytogenes_1639_v132 | 0.922  |
| Listeria_monocytogenes_EGD_1334565                       | Listeria_monocytogenes_1639_v132 | 0.9131 |
| Listeria_monocytogenes_CFSAN002349_1299895               | Listeria_monocytogenes_1639_v132 | 0.9218 |
| Listeria_monocytogenes_ATCC_19117_882095_v1              | Listeria_monocytogenes_1639_v132 | 0.9215 |
| Listeria_monocytogenes_ATCC_19117_882095                 | Listeria_monocytogenes_1639_v132 | 0.9215 |
| Listeria_monocytogenes_6179_1288295                      | Listeria_monocytogenes_1639_v132 | 0.9044 |
| Listeria_monocytogenes_1639_v9                           | Listeria_monocytogenes_1639_v132 | 0.8959 |
| Listeria_monocytogenes_1639_v99                          | Listeria_monocytogenes_1639_v132 | 0.9121 |
| Listeria_monocytogenes_1639_v98                          | Listeria_monocytogenes_1639_v132 | 0.9141 |
| Listeria_monocytogenes_1639_v97                          | Listeria_monocytogenes_1639_v132 | 0.9178 |
| Listeria_monocytogenes_1639_v96                          | Listeria_monocytogenes_1639_v132 | 0.9114 |
| Listeria_monocytogenes_1639_v95                          | Listeria_monocytogenes_1639_v132 | 0.9114 |
| Listeria_monocytogenes_1639_v94                          | Listeria_monocytogenes_1639_v132 | 0.9118 |
| Listeria_monocytogenes_1639_v93                          | Listeria_monocytogenes_1639_v132 | 0.9006 |
| Listeria_monocytogenes_1639_v92                          | Listeria_monocytogenes_1639_v132 | 0.9132 |
| Listeria_monocytogenes_1639_v91                          | Listeria_monocytogenes_1639_v132 | 0.9194 |
| Listeria_monocytogenes_1639_v90                          | Listeria_monocytogenes_1639_v132 | 0.9141 |
| Listeria_monocytogenes_1639_v8                           | Listeria_monocytogenes_1639_v132 | 0.8909 |
| Listeria_monocytogenes_1639_v89                          | Listeria_monocytogenes_1639_v132 | 0.9272 |
| Listeria_monocytogenes_1639_v88                          | Listeria_monocytogenes_1639_v132 | 0.9079 |
| Listeria_monocytogenes_1639_v87                          | Listeria_monocytogenes_1639_v132 | 0.9116 |
| Listeria_monocytogenes_1639_v86                          | Listeria_monocytogenes_1639_v132 | 0.9109 |
| Listeria_monocytogenes_1639_v85                          | Listeria_monocytogenes_1639_v132 | 0.9201 |
| Listeria_monocytogenes_1639_v84                          | Listeria_monocytogenes_1639_v132 | 0.9103 |
| Listeria_monocytogenes_1639_v83                          | Listeria_monocytogenes_1639_v132 | 0.9224 |
| Listeria_monocytogenes_1639_v82                          | Listeria_monocytogenes_1639_v132 | 0.9217 |
| Listeria_monocytogenes_1639_v81                          | Listeria_monocytogenes_1639_v132 | 0.9079 |
| Listeria_monocytogenes_1639_v80                          | Listeria_monocytogenes_1639_v132 | 0.9163 |
| Listeria_monocytogenes_1639_v7                           | Listeria_monocytogenes_1639_v132 | 0.8909 |
| Listeria_monocytogenes_1639_v79                          | Listeria_monocytogenes_1639_v132 | 0.9059 |
| Listeria_monocytogenes_1639_v78                          | Listeria_monocytogenes_1639_v132 | 0.9083 |
| Listeria_monocytogenes_1639_v77                          | Listeria_monocytogenes_1639_v132 | 0.9035 |
| Listeria_monocytogenes_1639_v76                          | Listeria_monocytogenes_1639_v132 | 0.9027 |
| Listeria_monocytogenes_1639_v75                          | Listeria_monocytogenes_1639_v132 | 0.9251 |
| Listeria_monocytogenes_1639_v74                          | Listeria_monocytogenes_1639_v132 | 0.9105 |
| Listeria_monocytogenes_1639_v73                          | Listeria_monocytogenes_1639_v132 | 0.9055 |
| Listeria_monocytogenes_1639_v72                          | Listeria_monocytogenes_1639_v132 | 0.9227 |
| Listeria_monocytogenes_1639_v71                          | Listeria_monocytogenes_1639_v132 | 0.8954 |
| Listeria_monocytogenes_1639_v70                          | Listeria_monocytogenes_1639_v132 | 0.9048 |
| Listeria_monocytogenes_1639_v6                           | Listeria_monocytogenes_1639_v132 | 0.8902 |
| Listeria_monocytogenes_1639_v69                          | Listeria_monocytogenes_1639_v132 | 0.9221 |
| Listeria_monocytogenes_1639_v68                          | Listeria_monocytogenes_1639_v132 | 0.9191 |
| Listeria_monocytogenes_1639_v67                          | Listeria_monocytogenes_1639_v132 | 0.9094 |
| Listeria_monocytogenes_1639_v66                          | Listeria_monocytogenes_1639_v132 | 0.9074 |
| Listeria_monocytogenes_1639_v65                          | Listeria_monocytogenes_1639_v132 | 0.9059 |
| Listeria_monocytogenes_1639_v64                          | Listeria_monocytogenes_1639_v132 | 0.9051 |
| Listeria_monocytogenes_1639_v63                          | Listeria_monocytogenes_1639_v132 | 0.907  |
| Listeria_monocytogenes_1639_v62                          | Listeria_monocytogenes_1639_v132 | 0.9046 |
| Listeria_monocytogenes_1639_v61                          | Listeria_monocytogenes_1639_v132 | 0.901  |
| Listeria_monocytogenes_1639_v60                          | Listeria_monocytogenes_1639_v132 | 0.9127 |
| Listeria_monocytogenes_1639_v5                           | Listeria_monocytogenes_1639_v132 | 0.8827 |
| Listeria_monocytogenes_1639_v59                          | Listeria_monocytogenes_1639_v132 | 0.9156 |
| Listeria_monocytogenes_1639_v58                          | Listeria_monocytogenes_1639_v132 | 0.9235 |
| Listeria_monocytogenes_1639_v57                          | Listeria_monocytogenes_1639_v132 | 0.9073 |
| Listeria_monocytogenes_1639_v56                          | Listeria_monocytogenes_1639_v132 | 0.9183 |
| Listeria_monocytogenes_1639_v55                          | Listeria_monocytogenes_1639_v132 | 0.9114 |
| Listeria_monocytogenes_1639_v54                          | Listeria_monocytogenes_1639_v132 | 0.9042 |
| Listeria_monocytogenes_1639_v53                          | Listeria_monocytogenes_1639_v132 | 0.9071 |
| Listeria_monocytogenes_1639_v52                          | Listeria_monocytogenes_1639_v132 | 0.9223 |
| Listeria_monocytogenes_1639_v51                          | Listeria_monocytogenes_1639_v132 | 0.9187 |
| Listeria_monocytogenes_1639_v50                          | Listeria_monocytogenes_1639_v132 | 0.8977 |
| Listeria_monocytogenes_1639_v4                           | Listeria_monocytogenes_1639_v132 | 0.8925 |
| Listeria_monocytogenes_1639_v49                          | Listeria_monocytogenes_1639_v132 | 0.9095 |
| Listeria_monocytogenes_1639_v48                          | Listeria_monocytogenes_1639_v132 | 0.901  |
| Listeria_monocytogenes_1639_v47                          | Listeria_monocytogenes_1639_v132 | 0.8996 |
| Listeria_monocytogenes_1639_v46                          | Listeria_monocytogenes_1639_v132 | 0.9113 |
| Listeria_monocytogenes_1639_v45                          | Listeria_monocytogenes_1639_v132 | 0.8922 |

[illegible]



|                                                          |                                  |        |
|----------------------------------------------------------|----------------------------------|--------|
| Listeria_monocytogenes_1639_v141                         | Listeria_monocytogenes_1639_v132 | 0.9229 |
| Listeria_monocytogenes_1639_v140                         | Listeria_monocytogenes_1639_v132 | 0.9283 |
| Listeria_monocytogenes_1639_v13                          | Listeria_monocytogenes_1639_v132 | 0.8973 |
| Listeria_monocytogenes_1639_v139                         | Listeria_monocytogenes_1639_v132 | 0.9193 |
| Listeria_monocytogenes_1639_v138                         | Listeria_monocytogenes_1639_v132 | 0.9276 |
| Listeria_monocytogenes_1639_v137                         | Listeria_monocytogenes_1639_v132 | 0.9272 |
| Listeria_monocytogenes_1639_v136                         | Listeria_monocytogenes_1639_v132 | 0.9126 |
| Listeria_monocytogenes_1639_v135                         | Listeria_monocytogenes_1639_v132 | 0.9372 |
| Listeria_monocytogenes_1639_v134                         | Listeria_monocytogenes_1639_v132 | 0.9174 |
| Listeria_monocytogenes_1639_v133                         | Listeria_monocytogenes_1639_v132 | 0.9171 |
| Listeria_monocytogenes_1639_v132                         | Listeria_monocytogenes_1639_v132 | 0.0617 |
| Listeria_welshimeri_1643                                 | Listeria_monocytogenes_1639_v133 | 0.8728 |
| Listeria_welshimeri_serovar_6b_str_SLCC5334_386043       | Listeria_monocytogenes_1639_v133 | 0.8725 |
| Listeria_seeligeri_serovar_1_2b_str_SLCC3954_683837      | Listeria_monocytogenes_1639_v133 | 0.8858 |
| Listeria_seeligeri_FSL_S4-171_702452                     | Listeria_monocytogenes_1639_v133 | 0.8258 |
| Listeria_seeligeri_FSL_N1-067_702453                     | Listeria_monocytogenes_1639_v133 | 0.8386 |
| Listeria_seeligeri_1640_v1                               | Listeria_monocytogenes_1639_v133 | 0.8846 |
| Listeria_seeligeri_1640                                  | Listeria_monocytogenes_1639_v133 | 0.8812 |
| Listeria_monocytogenes_WSLC1042_1457188                  | Listeria_monocytogenes_1639_v133 | 0.933  |
| Listeria_monocytogenes_WSLC1001_1457187                  | Listeria_monocytogenes_1639_v133 | 0.9534 |
| Listeria_monocytogenes_SLCC7179_879090                   | Listeria_monocytogenes_1639_v133 | 0.9598 |
| Listeria_monocytogenes_SLCC5850_882096                   | Listeria_monocytogenes_1639_v133 | 0.957  |
| Listeria_monocytogenes_SLCC2755_932919                   | Listeria_monocytogenes_1639_v133 | 0.9358 |
| Listeria_monocytogenes_SLCC2540_879089                   | Listeria_monocytogenes_1639_v133 | 0.9404 |
| Listeria_monocytogenes_SLCC2479_882020                   | Listeria_monocytogenes_1639_v133 | 0.9544 |
| Listeria_monocytogenes_SLCC2378_879088                   | Listeria_monocytogenes_1639_v133 | 0.934  |
| Listeria_monocytogenes_SLCC2376_882097                   | Listeria_monocytogenes_1639_v133 | 0.9422 |
| Listeria_monocytogenes_SLCC2372_932920                   | Listeria_monocytogenes_1639_v133 | 0.9477 |
| Listeria_monocytogenes_serotype_4b_str_LL195_1230340     | Listeria_monocytogenes_1639_v133 | 0.9398 |
| Listeria_monocytogenes_serotype_4b_str_LIS0087_1134669   | Listeria_monocytogenes_1639_v133 | 0.9369 |
| Listeria_monocytogenes_serotype_4b_str_F2365_265669      | Listeria_monocytogenes_1639_v133 | 0.9398 |
| Listeria_monocytogenes_serotype_4b_str_CLIP_80459_568819 | Listeria_monocytogenes_1639_v133 | 0.9435 |
| Listeria_monocytogenes_serotype_4b_str_81-0861_1196161   | Listeria_monocytogenes_1639_v133 | 0.9272 |
| Listeria_monocytogenes_serotype_4b_str_81-0592_1196160   | Listeria_monocytogenes_1639_v133 | 0.9283 |
| Listeria_monocytogenes_serotype_4b_str_81-0558_1196159   | Listeria_monocytogenes_1639_v133 | 0.9279 |
| Listeria_monocytogenes_serotype_4b_str_10-0809_1196162   | Listeria_monocytogenes_1639_v133 | 0.9283 |
| Listeria_monocytogenes_serotype_4b_str_02-6680_1196175   | Listeria_monocytogenes_1639_v133 | 0.939  |
| Listeria_monocytogenes_serotype_4b_str_02-6679_1196174   | Listeria_monocytogenes_1639_v133 | 0.939  |
| Listeria_monocytogenes_serotype_4b_str_02-1792_1196173   | Listeria_monocytogenes_1639_v133 | 0.9298 |
| Listeria_monocytogenes_serotype_4b_str_02-1289_1196172   | Listeria_monocytogenes_1639_v133 | 0.9298 |
| Listeria_monocytogenes_serotype_4b_str_02-1103_1196171   | Listeria_monocytogenes_1639_v133 | 0.9298 |
| Listeria_monocytogenes_serotype_3c_str_10-5027_1196195   | Listeria_monocytogenes_1639_v133 | 0.9563 |
| Listeria_monocytogenes_serotype_1_2c_str_10-5026_1196194 | Listeria_monocytogenes_1639_v133 | 0.9571 |
| Listeria_monocytogenes_serotype_1_2c_str_10-5025_1196193 | Listeria_monocytogenes_1639_v133 | 0.9571 |
| Listeria_monocytogenes_serotype_1_2b_str_10-0811_1196164 | Listeria_monocytogenes_1639_v133 | 0.934  |
| Listeria_monocytogenes_serotype_1_2b_str_10-0810_1196163 | Listeria_monocytogenes_1639_v133 | 0.934  |
| Listeria_monocytogenes_serotype_1_2a_str_99-6370_1196179 | Listeria_monocytogenes_1639_v133 | 0.9431 |
| Listeria_monocytogenes_serotype_1_2a_str_98-2035_1196178 | Listeria_monocytogenes_1639_v133 | 0.9431 |
| Listeria_monocytogenes_serotype_1_2a_str_95-0093_1196177 | Listeria_monocytogenes_1639_v133 | 0.9487 |
| Listeria_monocytogenes_serotype_1_2a_str_88-0478_1196176 | Listeria_monocytogenes_1639_v133 | 0.9484 |
| Listeria_monocytogenes_serotype_1_2a_str_10-5024_1196192 | Listeria_monocytogenes_1639_v133 | 0.9487 |
| Listeria_monocytogenes_serotype_1_2a_str_10-4758_1196168 | Listeria_monocytogenes_1639_v133 | 0.957  |
| Listeria_monocytogenes_serotype_1_2a_str_10-4754_1196167 | Listeria_monocytogenes_1639_v133 | 0.9574 |
| Listeria_monocytogenes_serotype_1_2a_str_10-1321_1196191 | Listeria_monocytogenes_1639_v133 | 0.9487 |
| Listeria_monocytogenes_serotype_1_2a_str_10-1047_1196190 | Listeria_monocytogenes_1639_v133 | 0.9495 |
| Listeria_monocytogenes_serotype_1_2a_str_10-1046_1196189 | Listeria_monocytogenes_1639_v133 | 0.9495 |
| Listeria_monocytogenes_serotype_1_2a_str_10-0934_1196170 | Listeria_monocytogenes_1639_v133 | 0.9657 |
| Listeria_monocytogenes_serotype_1_2a_str_10-0933_1196169 | Listeria_monocytogenes_1639_v133 | 0.9657 |
| Listeria_monocytogenes_serotype_1_2a_str_10-0815_1196188 | Listeria_monocytogenes_1639_v133 | 0.9445 |
| Listeria_monocytogenes_serotype_1_2a_str_10-0814_1196187 | Listeria_monocytogenes_1639_v133 | 0.9487 |
| Listeria_monocytogenes_serotype_1_2a_str_10-0813_1196166 | Listeria_monocytogenes_1639_v133 | 0.9535 |
| Listeria_monocytogenes_serotype_1_2a_str_10-0812_1196165 | Listeria_monocytogenes_1639_v133 | 0.9535 |
| Listeria_monocytogenes_serotype_1_2a_str_08-7669_1196186 | Listeria_monocytogenes_1639_v133 | 0.9577 |
| Listeria_monocytogenes_serotype_1_2a_str_08-7374_1196185 | Listeria_monocytogenes_1639_v133 | 0.9487 |
| Listeria_monocytogenes_serotype_1_2a_str_08-6997_1196184 | Listeria_monocytogenes_1639_v133 | 0.9445 |
| Listeria_monocytogenes_serotype_1_2a_str_08-6569_1196183 | Listeria_monocytogenes_1639_v133 | 0.9445 |
| Listeria_monocytogenes_serotype_1_2a_str_08-6056_1196182 | Listeria_monocytogenes_1639_v133 | 0.9445 |
| Listeria_monocytogenes_serotype_1_2a_str_04-5457_1196181 | Listeria_monocytogenes_1639_v133 | 0.9487 |
| Listeria_monocytogenes_serotype_1_2a_str_02-5993_1196180 | Listeria_monocytogenes_1639_v133 | 0.9487 |
| Listeria_monocytogenes_R479a_1437838                     | Listeria_monocytogenes_1639_v133 | 0.9495 |
| Listeria_monocytogenes_N53-1_1234142                     | Listeria_monocytogenes_1639_v133 | 0.9104 |
| Listeria_monocytogenes_M7_1030009                        | Listeria_monocytogenes_1639_v133 | 0.9062 |
| Listeria_monocytogenes_LO28_393132                       | Listeria_monocytogenes_1639_v133 | 0.9504 |
| Listeria_monocytogenes_L99_563174                        | Listeria_monocytogenes_1639_v133 | 0.9066 |
| Listeria_monocytogenes_L312_882094                       | Listeria_monocytogenes_1639_v133 | 0.9435 |
| Listeria_monocytogenes_J1816_930781                      | Listeria_monocytogenes_1639_v133 | 0.932  |
| Listeria_monocytogenes_J1-220_930782                     | Listeria_monocytogenes_1639_v133 | 0.9214 |
| Listeria_monocytogenes_J0161_393130                      | Listeria_monocytogenes_1639_v133 | 0.9616 |
| Listeria_monocytogenes_HCC23_552536                      | Listeria_monocytogenes_1639_v133 | 0.9059 |
| Listeria_monocytogenes_FSL_R2-561_393126                 | Listeria_monocytogenes_1639_v133 | 0.9537 |
| Listeria_monocytogenes_FSL_J1-208_393119                 | Listeria_monocytogenes_1639_v133 | 0.9085 |
| Listeria_monocytogenes_FSL_J1-175_393118                 | Listeria_monocytogenes_1639_v133 | 0.9467 |
| Listeria_monocytogenes_Finland_1998_393127               | Listeria_monocytogenes_1639_v133 | 0.9661 |
| Listeria_monocytogenes_EGD-e_169963_v1                   | Listeria_monocytogenes_1639_v133 | 0.9571 |
| Listeria_monocytogenes_EGD-e_169963                      | Listeria_monocytogenes_1639_v133 | 0.9571 |
| Listeria_monocytogenes_EGD_1334565                       | Listeria_monocytogenes_1639_v133 | 0.9577 |
| Listeria_monocytogenes_CFSAN002349_1299895               | Listeria_monocytogenes_1639_v133 | 0.9391 |
| Listeria_monocytogenes_ATCC_19117_882095_v1              | Listeria_monocytogenes_1639_v133 | 0.9361 |
| Listeria_monocytogenes_ATCC_19117_882095                 | Listeria_monocytogenes_1639_v133 | 0.9358 |
| Listeria_monocytogenes_6179_1288295                      | Listeria_monocytogenes_1639_v133 | 0.947  |
| Listeria_monocytogenes_1639_v9                           | Listeria_monocytogenes_1639_v133 | 0.9312 |

[illegible]

|                                                          |                                  |        |
|----------------------------------------------------------|----------------------------------|--------|
| Listeria_monocytogenes_1639_v196                         | Listeria_monocytogenes_1639_v133 | 0.9407 |
| Listeria_monocytogenes_1639_v195                         | Listeria_monocytogenes_1639_v133 | 0.9436 |
| Listeria_monocytogenes_1639_v194                         | Listeria_monocytogenes_1639_v133 | 0.9422 |
| Listeria_monocytogenes_1639_v193                         | Listeria_monocytogenes_1639_v133 | 0.9426 |
| Listeria_monocytogenes_1639_v192                         | Listeria_monocytogenes_1639_v133 | 0.9    |
| Listeria_monocytogenes_1639_v191                         | Listeria_monocytogenes_1639_v133 | 0.9656 |
| Listeria_monocytogenes_1639_v190                         | Listeria_monocytogenes_1639_v133 | 0.9668 |
| Listeria_monocytogenes_1639_v18                          | Listeria_monocytogenes_1639_v133 | 0.9227 |
| Listeria_monocytogenes_1639_v189                         | Listeria_monocytogenes_1639_v133 | 0.9657 |
| Listeria_monocytogenes_1639_v188                         | Listeria_monocytogenes_1639_v133 | 0.9656 |
| Listeria_monocytogenes_1639_v187                         | Listeria_monocytogenes_1639_v133 | 0.9668 |
| Listeria_monocytogenes_1639_v186                         | Listeria_monocytogenes_1639_v133 | 0.9668 |
| Listeria_monocytogenes_1639_v185                         | Listeria_monocytogenes_1639_v133 | 0.9672 |
| Listeria_monocytogenes_1639_v184                         | Listeria_monocytogenes_1639_v133 | 0.9664 |
| Listeria_monocytogenes_1639_v183                         | Listeria_monocytogenes_1639_v133 | 0.9672 |
| Listeria_monocytogenes_1639_v182                         | Listeria_monocytogenes_1639_v133 | 0.9694 |
| Listeria_monocytogenes_1639_v181                         | Listeria_monocytogenes_1639_v133 | 0.9205 |
| Listeria_monocytogenes_1639_v180                         | Listeria_monocytogenes_1639_v133 | 0.9205 |
| Listeria_monocytogenes_1639_v17                          | Listeria_monocytogenes_1639_v133 | 0.9231 |
| Listeria_monocytogenes_1639_v179                         | Listeria_monocytogenes_1639_v133 | 0.9652 |
| Listeria_monocytogenes_1639_v178                         | Listeria_monocytogenes_1639_v133 | 0.9653 |
| Listeria_monocytogenes_1639_v177                         | Listeria_monocytogenes_1639_v133 | 0.9398 |
| Listeria_monocytogenes_1639_v176                         | Listeria_monocytogenes_1639_v133 | 0.9372 |
| Listeria_monocytogenes_1639_v175                         | Listeria_monocytogenes_1639_v133 | 0.9591 |
| Listeria_monocytogenes_1639_v174                         | Listeria_monocytogenes_1639_v133 | 0.9676 |
| Listeria_monocytogenes_1639_v173                         | Listeria_monocytogenes_1639_v133 | 0.9534 |
| Listeria_monocytogenes_1639_v172                         | Listeria_monocytogenes_1639_v133 | 0.939  |
| Listeria_monocytogenes_1639_v171                         | Listeria_monocytogenes_1639_v133 | 0.9552 |
| Listeria_monocytogenes_1639_v170                         | Listeria_monocytogenes_1639_v133 | 0.9624 |
| Listeria_monocytogenes_1639_v16                          | Listeria_monocytogenes_1639_v133 | 0.9352 |
| Listeria_monocytogenes_1639_v169                         | Listeria_monocytogenes_1639_v133 | 0.9628 |
| Listeria_monocytogenes_1639_v168                         | Listeria_monocytogenes_1639_v133 | 0.9592 |
| Listeria_monocytogenes_1639_v167                         | Listeria_monocytogenes_1639_v133 | 0.9674 |
| Listeria_monocytogenes_1639_v166                         | Listeria_monocytogenes_1639_v133 | 0.9596 |
| Listeria_monocytogenes_1639_v165                         | Listeria_monocytogenes_1639_v133 | 0.9625 |
| Listeria_monocytogenes_1639_v164                         | Listeria_monocytogenes_1639_v133 | 0.9393 |
| Listeria_monocytogenes_1639_v163                         | Listeria_monocytogenes_1639_v133 | 0.9478 |
| Listeria_monocytogenes_1639_v162                         | Listeria_monocytogenes_1639_v133 | 0.9393 |
| Listeria_monocytogenes_1639_v161                         | Listeria_monocytogenes_1639_v133 | 0.9401 |
| Listeria_monocytogenes_1639_v160                         | Listeria_monocytogenes_1639_v133 | 0.9397 |
| Listeria_monocytogenes_1639_v15                          | Listeria_monocytogenes_1639_v133 | 0.9225 |
| Listeria_monocytogenes_1639_v159                         | Listeria_monocytogenes_1639_v133 | 0.9398 |
| Listeria_monocytogenes_1639_v158                         | Listeria_monocytogenes_1639_v133 | 0.9398 |
| Listeria_monocytogenes_1639_v157                         | Listeria_monocytogenes_1639_v133 | 0.9398 |
| Listeria_monocytogenes_1639_v156                         | Listeria_monocytogenes_1639_v133 | 0.9469 |
| Listeria_monocytogenes_1639_v155                         | Listeria_monocytogenes_1639_v133 | 0.9672 |
| Listeria_monocytogenes_1639_v154                         | Listeria_monocytogenes_1639_v133 | 0.9588 |
| Listeria_monocytogenes_1639_v153                         | Listeria_monocytogenes_1639_v133 | 0.9583 |
| Listeria_monocytogenes_1639_v152                         | Listeria_monocytogenes_1639_v133 | 0.9398 |
| Listeria_monocytogenes_1639_v151                         | Listeria_monocytogenes_1639_v133 | 0.9398 |
| Listeria_monocytogenes_1639_v150                         | Listeria_monocytogenes_1639_v133 | 0.9599 |
| Listeria_monocytogenes_1639_v14                          | Listeria_monocytogenes_1639_v133 | 0.9234 |
| Listeria_monocytogenes_1639_v149                         | Listeria_monocytogenes_1639_v133 | 0.9581 |
| Listeria_monocytogenes_1639_v148                         | Listeria_monocytogenes_1639_v133 | 0.9391 |
| Listeria_monocytogenes_1639_v147                         | Listeria_monocytogenes_1639_v133 | 0.9253 |
| Listeria_monocytogenes_1639_v146                         | Listeria_monocytogenes_1639_v133 | 0.9707 |
| Listeria_monocytogenes_1639_v145                         | Listeria_monocytogenes_1639_v133 | 0.9616 |
| Listeria_monocytogenes_1639_v144                         | Listeria_monocytogenes_1639_v133 | 0.9428 |
| Listeria_monocytogenes_1639_v143                         | Listeria_monocytogenes_1639_v133 | 0.9742 |
| Listeria_monocytogenes_1639_v142                         | Listeria_monocytogenes_1639_v133 | 0.9432 |
| Listeria_monocytogenes_1639_v141                         | Listeria_monocytogenes_1639_v133 | 0.9485 |
| Listeria_monocytogenes_1639_v140                         | Listeria_monocytogenes_1639_v133 | 0.9439 |
| Listeria_monocytogenes_1639_v13                          | Listeria_monocytogenes_1639_v133 | 0.9225 |
| Listeria_monocytogenes_1639_v139                         | Listeria_monocytogenes_1639_v133 | 0.9367 |
| Listeria_monocytogenes_1639_v138                         | Listeria_monocytogenes_1639_v133 | 0.9432 |
| Listeria_monocytogenes_1639_v137                         | Listeria_monocytogenes_1639_v133 | 0.9428 |
| Listeria_monocytogenes_1639_v136                         | Listeria_monocytogenes_1639_v133 | 0.9578 |
| Listeria_monocytogenes_1639_v135                         | Listeria_monocytogenes_1639_v133 | 0.9182 |
| Listeria_monocytogenes_1639_v134                         | Listeria_monocytogenes_1639_v133 | 0.9339 |
| Listeria_monocytogenes_1639_v133                         | Listeria_monocytogenes_1639_v133 | 0.066  |
| Listeria_welshimeri_1643                                 | Listeria_monocytogenes_1639_v134 | 0.8876 |
| Listeria_welshimeri_serovar_6b_str_SLCC5334_386043       | Listeria_monocytogenes_1639_v134 | 0.8869 |
| Listeria_seeligeri_serovar_1_2b_str_SLCC3954_683837      | Listeria_monocytogenes_1639_v134 | 0.8825 |
| Listeria_seeligeri_FSL_S4-171_702452                     | Listeria_monocytogenes_1639_v134 | 0.8243 |
| Listeria_seeligeri_FSL_N1-067_702453                     | Listeria_monocytogenes_1639_v134 | 0.828  |
| Listeria_seeligeri_1640_v1                               | Listeria_monocytogenes_1639_v134 | 0.8936 |
| Listeria_seeligeri_1640                                  | Listeria_monocytogenes_1639_v134 | 0.8814 |
| Listeria_monocytogenes_WSLC1042_1457188                  | Listeria_monocytogenes_1639_v134 | 0.995  |
| Listeria_monocytogenes_WSLC1001_1457187                  | Listeria_monocytogenes_1639_v134 | 0.9255 |
| Listeria_monocytogenes_SLCC7179_879090                   | Listeria_monocytogenes_1639_v134 | 0.936  |
| Listeria_monocytogenes_SLCC5850_882096                   | Listeria_monocytogenes_1639_v134 | 0.9302 |
| Listeria_monocytogenes_SLCC2755_932919                   | Listeria_monocytogenes_1639_v134 | 0.9455 |
| Listeria_monocytogenes_SLCC2540_879089                   | Listeria_monocytogenes_1639_v134 | 0.9502 |
| Listeria_monocytogenes_SLCC2479_882020                   | Listeria_monocytogenes_1639_v134 | 0.9264 |
| Listeria_monocytogenes_SLCC2378_879088                   | Listeria_monocytogenes_1639_v134 | 0.9966 |
| Listeria_monocytogenes_SLCC2376_882097                   | Listeria_monocytogenes_1639_v134 | 0.9397 |
| Listeria_monocytogenes_SLCC2372_932920                   | Listeria_monocytogenes_1639_v134 | 0.9192 |
| Listeria_monocytogenes_serotype_4b_str_LL195_1230340     | Listeria_monocytogenes_1639_v134 | 0.9927 |
| Listeria_monocytogenes_serotype_4b_str_LIS0087_1134669   | Listeria_monocytogenes_1639_v134 | 0.9057 |
| Listeria_monocytogenes_serotype_4b_str_F2365_265669      | Listeria_monocytogenes_1639_v134 | 0.9927 |
| Listeria_monocytogenes_serotype_4b_str_CLIP_80459_568819 | Listeria_monocytogenes_1639_v134 | 0.9727 |

|                                                          |                                  |        |
|----------------------------------------------------------|----------------------------------|--------|
| Listeria_monocytogenes_serotype_4b_str_81-0861_1196161   | Listeria_monocytogenes_1639_v134 | 0.9845 |
| Listeria_monocytogenes_serotype_4b_str_81-0592_1196160   | Listeria_monocytogenes_1639_v134 | 0.9856 |
| Listeria_monocytogenes_serotype_4b_str_81-0558_1196159   | Listeria_monocytogenes_1639_v134 | 0.9852 |
| Listeria_monocytogenes_serotype_4b_str_10-0809_1196162   | Listeria_monocytogenes_1639_v134 | 0.986  |
| Listeria_monocytogenes_serotype_4b_str_02-6680_1196175   | Listeria_monocytogenes_1639_v134 | 0.9727 |
| Listeria_monocytogenes_serotype_4b_str_02-6679_1196174   | Listeria_monocytogenes_1639_v134 | 0.9727 |
| Listeria_monocytogenes_serotype_4b_str_02-1792_1196173   | Listeria_monocytogenes_1639_v134 | 0.9864 |
| Listeria_monocytogenes_serotype_4b_str_02-1289_1196172   | Listeria_monocytogenes_1639_v134 | 0.9864 |
| Listeria_monocytogenes_serotype_4b_str_02-1103_1196171   | Listeria_monocytogenes_1639_v134 | 0.9864 |
| Listeria_monocytogenes_serotype_3c_str_10-5027_1196195   | Listeria_monocytogenes_1639_v134 | 0.9257 |
| Listeria_monocytogenes_serotype_1_2c_str_10-5026_1196194 | Listeria_monocytogenes_1639_v134 | 0.9268 |
| Listeria_monocytogenes_serotype_1_2c_str_10-5025_1196193 | Listeria_monocytogenes_1639_v134 | 0.9268 |
| Listeria_monocytogenes_serotype_1_2b_str_10-0811_1196164 | Listeria_monocytogenes_1639_v134 | 0.938  |
| Listeria_monocytogenes_serotype_1_2b_str_10-0810_1196163 | Listeria_monocytogenes_1639_v134 | 0.938  |
| Listeria_monocytogenes_serotype_1_2a_str_99-6370_1196179 | Listeria_monocytogenes_1639_v134 | 0.9118 |
| Listeria_monocytogenes_serotype_1_2a_str_98-2035_1196178 | Listeria_monocytogenes_1639_v134 | 0.9118 |
| Listeria_monocytogenes_serotype_1_2a_str_95-0093_1196177 | Listeria_monocytogenes_1639_v134 | 0.9172 |
| Listeria_monocytogenes_serotype_1_2a_str_88-0478_1196176 | Listeria_monocytogenes_1639_v134 | 0.9164 |
| Listeria_monocytogenes_serotype_1_2a_str_10-5024_1196192 | Listeria_monocytogenes_1639_v134 | 0.9175 |
| Listeria_monocytogenes_serotype_1_2a_str_10-4758_1196168 | Listeria_monocytogenes_1639_v134 | 0.9356 |
| Listeria_monocytogenes_serotype_1_2a_str_10-4754_1196167 | Listeria_monocytogenes_1639_v134 | 0.9356 |
| Listeria_monocytogenes_serotype_1_2a_str_10-1321_1196191 | Listeria_monocytogenes_1639_v134 | 0.9175 |
| Listeria_monocytogenes_serotype_1_2a_str_10-1047_1196190 | Listeria_monocytogenes_1639_v134 | 0.9179 |
| Listeria_monocytogenes_serotype_1_2a_str_10-1046_1196189 | Listeria_monocytogenes_1639_v134 | 0.9179 |
| Listeria_monocytogenes_serotype_1_2a_str_10-0934_1196170 | Listeria_monocytogenes_1639_v134 | 0.9429 |
| Listeria_monocytogenes_serotype_1_2a_str_10-0933_1196169 | Listeria_monocytogenes_1639_v134 | 0.9429 |
| Listeria_monocytogenes_serotype_1_2a_str_10-0815_1196188 | Listeria_monocytogenes_1639_v134 | 0.9131 |
| Listeria_monocytogenes_serotype_1_2a_str_10-0814_1196187 | Listeria_monocytogenes_1639_v134 | 0.9176 |
| Listeria_monocytogenes_serotype_1_2a_str_10-0813_1196166 | Listeria_monocytogenes_1639_v134 | 0.9228 |
| Listeria_monocytogenes_serotype_1_2a_str_10-0812_1196165 | Listeria_monocytogenes_1639_v134 | 0.9228 |
| Listeria_monocytogenes_serotype_1_2a_str_08-7669_1196186 | Listeria_monocytogenes_1639_v134 | 0.9265 |
| Listeria_monocytogenes_serotype_1_2a_str_08-7374_1196185 | Listeria_monocytogenes_1639_v134 | 0.9175 |
| Listeria_monocytogenes_serotype_1_2a_str_08-6997_1196184 | Listeria_monocytogenes_1639_v134 | 0.9131 |
| Listeria_monocytogenes_serotype_1_2a_str_08-6569_1196183 | Listeria_monocytogenes_1639_v134 | 0.9131 |
| Listeria_monocytogenes_serotype_1_2a_str_08-6056_1196182 | Listeria_monocytogenes_1639_v134 | 0.9131 |
| Listeria_monocytogenes_serotype_1_2a_str_04-5457_1196181 | Listeria_monocytogenes_1639_v134 | 0.9175 |
| Listeria_monocytogenes_serotype_1_2a_str_02-5993_1196180 | Listeria_monocytogenes_1639_v134 | 0.9172 |
| Listeria_monocytogenes_R479a_1437838                     | Listeria_monocytogenes_1639_v134 | 0.9165 |
| Listeria_monocytogenes_N53-1_1234142                     | Listeria_monocytogenes_1639_v134 | 0.8908 |
| Listeria_monocytogenes_M7_1030009                        | Listeria_monocytogenes_1639_v134 | 0.9046 |
| Listeria_monocytogenes_LO28_393132                       | Listeria_monocytogenes_1639_v134 | 0.925  |
| Listeria_monocytogenes_L99_563174                        | Listeria_monocytogenes_1639_v134 | 0.9053 |
| Listeria_monocytogenes_L312_882094                       | Listeria_monocytogenes_1639_v134 | 0.9731 |
| Listeria_monocytogenes_J1816_930781                      | Listeria_monocytogenes_1639_v134 | 0.9492 |
| Listeria_monocytogenes_J1-220_930782                     | Listeria_monocytogenes_1639_v134 | 0.9606 |
| Listeria_monocytogenes_J0161_393130                      | Listeria_monocytogenes_1639_v134 | 0.9235 |
| Listeria_monocytogenes_HCC23_552536                      | Listeria_monocytogenes_1639_v134 | 0.9046 |
| Listeria_monocytogenes_FSL_R2-561_393126                 | Listeria_monocytogenes_1639_v134 | 0.925  |
| Listeria_monocytogenes_FSL_J1-208_393119                 | Listeria_monocytogenes_1639_v134 | 0.9191 |
| Listeria_monocytogenes_FSL_J1-175_393118                 | Listeria_monocytogenes_1639_v134 | 0.9535 |
| Listeria_monocytogenes_Finland_1998_393127               | Listeria_monocytogenes_1639_v134 | 0.9424 |
| Listeria_monocytogenes_EGD-e_169963_v1                   | Listeria_monocytogenes_1639_v134 | 0.9349 |
| Listeria_monocytogenes_EGD-e_169963                      | Listeria_monocytogenes_1639_v134 | 0.9353 |
| Listeria_monocytogenes_EGD_1334565                       | Listeria_monocytogenes_1639_v134 | 0.9309 |
| Listeria_monocytogenes_CFSAN002349_1299895               | Listeria_monocytogenes_1639_v134 | 0.9728 |
| Listeria_monocytogenes_ATCC_19117_882095_v1              | Listeria_monocytogenes_1639_v134 | 0.9812 |
| Listeria_monocytogenes_ATCC_19117_882095                 | Listeria_monocytogenes_1639_v134 | 0.9812 |
| Listeria_monocytogenes_6179_1288295                      | Listeria_monocytogenes_1639_v134 | 0.9086 |
| Listeria_monocytogenes_1639_v9                           | Listeria_monocytogenes_1639_v134 | 0.9244 |
| Listeria_monocytogenes_1639_v99                          | Listeria_monocytogenes_1639_v134 | 0.9503 |
| Listeria_monocytogenes_1639_v98                          | Listeria_monocytogenes_1639_v134 | 0.92   |
| Listeria_monocytogenes_1639_v97                          | Listeria_monocytogenes_1639_v134 | 0.9643 |
| Listeria_monocytogenes_1639_v96                          | Listeria_monocytogenes_1639_v134 | 0.9496 |
| Listeria_monocytogenes_1639_v95                          | Listeria_monocytogenes_1639_v134 | 0.9496 |
| Listeria_monocytogenes_1639_v94                          | Listeria_monocytogenes_1639_v134 | 0.9496 |
| Listeria_monocytogenes_1639_v93                          | Listeria_monocytogenes_1639_v134 | 0.9228 |
| Listeria_monocytogenes_1639_v92                          | Listeria_monocytogenes_1639_v134 | 0.95   |
| Listeria_monocytogenes_1639_v91                          | Listeria_monocytogenes_1639_v134 | 0.9725 |
| Listeria_monocytogenes_1639_v90                          | Listeria_monocytogenes_1639_v134 | 0.92   |
| Listeria_monocytogenes_1639_v8                           | Listeria_monocytogenes_1639_v134 | 0.9078 |
| Listeria_monocytogenes_1639_v89                          | Listeria_monocytogenes_1639_v134 | 0.96   |
| Listeria_monocytogenes_1639_v88                          | Listeria_monocytogenes_1639_v134 | 0.924  |
| Listeria_monocytogenes_1639_v87                          | Listeria_monocytogenes_1639_v134 | 0.919  |
| Listeria_monocytogenes_1639_v86                          | Listeria_monocytogenes_1639_v134 | 0.9183 |
| Listeria_monocytogenes_1639_v85                          | Listeria_monocytogenes_1639_v134 | 0.9838 |
| Listeria_monocytogenes_1639_v84                          | Listeria_monocytogenes_1639_v134 | 0.9272 |
| Listeria_monocytogenes_1639_v83                          | Listeria_monocytogenes_1639_v134 | 0.9697 |
| Listeria_monocytogenes_1639_v82                          | Listeria_monocytogenes_1639_v134 | 0.969  |
| Listeria_monocytogenes_1639_v81                          | Listeria_monocytogenes_1639_v134 | 0.9232 |
| Listeria_monocytogenes_1639_v80                          | Listeria_monocytogenes_1639_v134 | 0.9458 |
| Listeria_monocytogenes_1639_v7                           | Listeria_monocytogenes_1639_v134 | 0.9078 |
| Listeria_monocytogenes_1639_v79                          | Listeria_monocytogenes_1639_v134 | 0.9211 |
| Listeria_monocytogenes_1639_v78                          | Listeria_monocytogenes_1639_v134 | 0.9225 |
| Listeria_monocytogenes_1639_v77                          | Listeria_monocytogenes_1639_v134 | 0.9294 |
| Listeria_monocytogenes_1639_v76                          | Listeria_monocytogenes_1639_v134 | 0.9201 |
| Listeria_monocytogenes_1639_v75                          | Listeria_monocytogenes_1639_v134 | 0.9053 |
| Listeria_monocytogenes_1639_v74                          | Listeria_monocytogenes_1639_v134 | 0.9175 |
| Listeria_monocytogenes_1639_v73                          | Listeria_monocytogenes_1639_v134 | 0.9206 |
| Listeria_monocytogenes_1639_v72                          | Listeria_monocytogenes_1639_v134 | 0.9693 |
| Listeria_monocytogenes_1639_v71                          | Listeria_monocytogenes_1639_v134 | 0.9065 |
| Listeria_monocytogenes_1639_v70                          | Listeria_monocytogenes_1639_v134 | 0.923  |

[illegible]

|                                                          |                                  |        |
|----------------------------------------------------------|----------------------------------|--------|
| Listeria_monocytogenes_1639_v167                         | Listeria_monocytogenes_1639_v134 | 0.9308 |
| Listeria_monocytogenes_1639_v166                         | Listeria_monocytogenes_1639_v134 | 0.939  |
| Listeria_monocytogenes_1639_v165                         | Listeria_monocytogenes_1639_v134 | 0.9371 |
| Listeria_monocytogenes_1639_v164                         | Listeria_monocytogenes_1639_v134 | 0.9919 |
| Listeria_monocytogenes_1639_v163                         | Listeria_monocytogenes_1639_v134 | 0.9585 |
| Listeria_monocytogenes_1639_v162                         | Listeria_monocytogenes_1639_v134 | 0.9919 |
| Listeria_monocytogenes_1639_v161                         | Listeria_monocytogenes_1639_v134 | 0.9923 |
| Listeria_monocytogenes_1639_v160                         | Listeria_monocytogenes_1639_v134 | 0.9919 |
| Listeria_monocytogenes_1639_v15                          | Listeria_monocytogenes_1639_v134 | 0.9243 |
| Listeria_monocytogenes_1639_v159                         | Listeria_monocytogenes_1639_v134 | 0.9693 |
| Listeria_monocytogenes_1639_v158                         | Listeria_monocytogenes_1639_v134 | 0.9927 |
| Listeria_monocytogenes_1639_v157                         | Listeria_monocytogenes_1639_v134 | 0.9927 |
| Listeria_monocytogenes_1639_v156                         | Listeria_monocytogenes_1639_v134 | 0.9192 |
| Listeria_monocytogenes_1639_v155                         | Listeria_monocytogenes_1639_v134 | 0.9319 |
| Listeria_monocytogenes_1639_v154                         | Listeria_monocytogenes_1639_v134 | 0.9358 |
| Listeria_monocytogenes_1639_v153                         | Listeria_monocytogenes_1639_v134 | 0.9326 |
| Listeria_monocytogenes_1639_v152                         | Listeria_monocytogenes_1639_v134 | 0.9697 |
| Listeria_monocytogenes_1639_v151                         | Listeria_monocytogenes_1639_v134 | 0.9697 |
| Listeria_monocytogenes_1639_v150                         | Listeria_monocytogenes_1639_v134 | 0.9319 |
| Listeria_monocytogenes_1639_v14                          | Listeria_monocytogenes_1639_v134 | 0.9311 |
| Listeria_monocytogenes_1639_v149                         | Listeria_monocytogenes_1639_v134 | 0.9309 |
| Listeria_monocytogenes_1639_v148                         | Listeria_monocytogenes_1639_v134 | 0.9682 |
| Listeria_monocytogenes_1639_v147                         | Listeria_monocytogenes_1639_v134 | 0.9547 |
| Listeria_monocytogenes_1639_v146                         | Listeria_monocytogenes_1639_v134 | 0.9468 |
| Listeria_monocytogenes_1639_v145                         | Listeria_monocytogenes_1639_v134 | 0.9431 |
| Listeria_monocytogenes_1639_v144                         | Listeria_monocytogenes_1639_v134 | 0.9723 |
| Listeria_monocytogenes_1639_v143                         | Listeria_monocytogenes_1639_v134 | 0.9484 |
| Listeria_monocytogenes_1639_v142                         | Listeria_monocytogenes_1639_v134 | 0.9727 |
| Listeria_monocytogenes_1639_v141                         | Listeria_monocytogenes_1639_v134 | 0.9649 |
| Listeria_monocytogenes_1639_v140                         | Listeria_monocytogenes_1639_v134 | 0.9731 |
| Listeria_monocytogenes_1639_v13                          | Listeria_monocytogenes_1639_v134 | 0.9242 |
| Listeria_monocytogenes_1639_v139                         | Listeria_monocytogenes_1639_v134 | 0.9689 |
| Listeria_monocytogenes_1639_v138                         | Listeria_monocytogenes_1639_v134 | 0.9754 |
| Listeria_monocytogenes_1639_v137                         | Listeria_monocytogenes_1639_v134 | 0.9754 |
| Listeria_monocytogenes_1639_v136                         | Listeria_monocytogenes_1639_v134 | 0.9349 |
| Listeria_monocytogenes_1639_v135                         | Listeria_monocytogenes_1639_v134 | 0.9188 |
| Listeria_monocytogenes_1639_v134                         | Listeria_monocytogenes_1639_v134 | 0.067  |
| Listeria_welshimeri_1643                                 | Listeria_monocytogenes_1639_v135 | 0.8738 |
| Listeria_welshimeri_serovar_6b_str_SLCC5334_386043       | Listeria_monocytogenes_1639_v135 | 0.8735 |
| Listeria_seeligeri_serovar_1_2b_str_SLCC3954_683837      | Listeria_monocytogenes_1639_v135 | 0.8682 |
| Listeria_seeligeri_FSL_S4-171_702452                     | Listeria_monocytogenes_1639_v135 | 0.8167 |
| Listeria_seeligeri_FSL_N1-067_702453                     | Listeria_monocytogenes_1639_v135 | 0.8137 |
| Listeria_seeligeri_1640_v1                               | Listeria_monocytogenes_1639_v135 | 0.8641 |
| Listeria_seeligeri_1640                                  | Listeria_monocytogenes_1639_v135 | 0.8746 |
| Listeria_monocytogenes_WSLC1042_1457188                  | Listeria_monocytogenes_1639_v135 | 0.9184 |
| Listeria_monocytogenes_WSLC1001_1457187                  | Listeria_monocytogenes_1639_v135 | 0.9082 |
| Listeria_monocytogenes_SLCC7179_879090                   | Listeria_monocytogenes_1639_v135 | 0.9206 |
| Listeria_monocytogenes_SLCC5850_882096                   | Listeria_monocytogenes_1639_v135 | 0.9119 |
| Listeria_monocytogenes_SLCC2755_932919                   | Listeria_monocytogenes_1639_v135 | 0.9036 |
| Listeria_monocytogenes_SLCC2540_879089                   | Listeria_monocytogenes_1639_v135 | 0.9142 |
| Listeria_monocytogenes_SLCC2479_882020                   | Listeria_monocytogenes_1639_v135 | 0.9088 |
| Listeria_monocytogenes_SLCC2378_879088                   | Listeria_monocytogenes_1639_v135 | 0.9194 |
| Listeria_monocytogenes_SLCC2376_882097                   | Listeria_monocytogenes_1639_v135 | 0.9418 |
| Listeria_monocytogenes_SLCC2372_932920                   | Listeria_monocytogenes_1639_v135 | 0.9021 |
| Listeria_monocytogenes_serotype_4b_str_LL195_1230340     | Listeria_monocytogenes_1639_v135 | 0.9219 |
| Listeria_monocytogenes_serotype_4b_str_LIS0087_1134669   | Listeria_monocytogenes_1639_v135 | 0.8985 |
| Listeria_monocytogenes_serotype_4b_str_F2365_265669      | Listeria_monocytogenes_1639_v135 | 0.9219 |
| Listeria_monocytogenes_serotype_4b_str_CLIP_80459_568819 | Listeria_monocytogenes_1639_v135 | 0.9272 |
| Listeria_monocytogenes_serotype_4b_str_81-0861_1196161   | Listeria_monocytogenes_1639_v135 | 0.9218 |
| Listeria_monocytogenes_serotype_4b_str_81-0592_1196160   | Listeria_monocytogenes_1639_v135 | 0.9228 |
| Listeria_monocytogenes_serotype_4b_str_81-0558_1196159   | Listeria_monocytogenes_1639_v135 | 0.9232 |
| Listeria_monocytogenes_serotype_4b_str_10-0809_1196162   | Listeria_monocytogenes_1639_v135 | 0.9228 |
| Listeria_monocytogenes_serotype_4b_str_02-6680_1196175   | Listeria_monocytogenes_1639_v135 | 0.9216 |
| Listeria_monocytogenes_serotype_4b_str_02-6679_1196174   | Listeria_monocytogenes_1639_v135 | 0.9216 |
| Listeria_monocytogenes_serotype_4b_str_02-1792_1196173   | Listeria_monocytogenes_1639_v135 | 0.9236 |
| Listeria_monocytogenes_serotype_4b_str_02-1289_1196172   | Listeria_monocytogenes_1639_v135 | 0.9236 |
| Listeria_monocytogenes_serotype_4b_str_02-1103_1196171   | Listeria_monocytogenes_1639_v135 | 0.9236 |
| Listeria_monocytogenes_serotype_3c_str_10-5027_1196195   | Listeria_monocytogenes_1639_v135 | 0.9065 |
| Listeria_monocytogenes_serotype_1_2c_str_10-5026_1196194 | Listeria_monocytogenes_1639_v135 | 0.9069 |
| Listeria_monocytogenes_serotype_1_2c_str_10-5025_1196193 | Listeria_monocytogenes_1639_v135 | 0.9069 |
| Listeria_monocytogenes_serotype_1_2b_str_10-0811_1196164 | Listeria_monocytogenes_1639_v135 | 0.9144 |
| Listeria_monocytogenes_serotype_1_2b_str_10-0810_1196163 | Listeria_monocytogenes_1639_v135 | 0.9144 |
| Listeria_monocytogenes_serotype_1_2a_str_99-6370_1196179 | Listeria_monocytogenes_1639_v135 | 0.8937 |
| Listeria_monocytogenes_serotype_1_2a_str_98-2035_1196178 | Listeria_monocytogenes_1639_v135 | 0.8937 |
| Listeria_monocytogenes_serotype_1_2a_str_95-0093_1196177 | Listeria_monocytogenes_1639_v135 | 0.8975 |
| Listeria_monocytogenes_serotype_1_2a_str_88-0478_1196176 | Listeria_monocytogenes_1639_v135 | 0.8967 |
| Listeria_monocytogenes_serotype_1_2a_str_10-5024_1196192 | Listeria_monocytogenes_1639_v135 | 0.8975 |
| Listeria_monocytogenes_serotype_1_2a_str_10-4758_1196168 | Listeria_monocytogenes_1639_v135 | 0.9139 |
| Listeria_monocytogenes_serotype_1_2a_str_10-4754_1196167 | Listeria_monocytogenes_1639_v135 | 0.9143 |
| Listeria_monocytogenes_serotype_1_2a_str_10-1321_1196191 | Listeria_monocytogenes_1639_v135 | 0.8975 |
| Listeria_monocytogenes_serotype_1_2a_str_10-1047_1196190 | Listeria_monocytogenes_1639_v135 | 0.8986 |
| Listeria_monocytogenes_serotype_1_2a_str_10-1046_1196189 | Listeria_monocytogenes_1639_v135 | 0.8986 |
| Listeria_monocytogenes_serotype_1_2a_str_10-0934_1196170 | Listeria_monocytogenes_1639_v135 | 0.9204 |
| Listeria_monocytogenes_serotype_1_2a_str_10-0933_1196169 | Listeria_monocytogenes_1639_v135 | 0.9204 |
| Listeria_monocytogenes_serotype_1_2a_str_10-0815_1196188 | Listeria_monocytogenes_1639_v135 | 0.8939 |
| Listeria_monocytogenes_serotype_1_2a_str_10-0814_1196187 | Listeria_monocytogenes_1639_v135 | 0.8975 |
| Listeria_monocytogenes_serotype_1_2a_str_10-0813_1196166 | Listeria_monocytogenes_1639_v135 | 0.9144 |
| Listeria_monocytogenes_serotype_1_2a_str_10-0812_1196165 | Listeria_monocytogenes_1639_v135 | 0.9144 |
| Listeria_monocytogenes_serotype_1_2a_str_08-7669_1196186 | Listeria_monocytogenes_1639_v135 | 0.9066 |
| Listeria_monocytogenes_serotype_1_2a_str_08-7374_1196185 | Listeria_monocytogenes_1639_v135 | 0.8975 |
| Listeria_monocytogenes_serotype_1_2a_str_08-6997_1196184 | Listeria_monocytogenes_1639_v135 | 0.8939 |



|                                                          |                                  |        |
|----------------------------------------------------------|----------------------------------|--------|
| Listeria_monocytogenes_serotype_1_2a_str_08-6569_1196183 | Listeria_monocytogenes_1639_v135 | 0.8939 |
| Listeria_monocytogenes_serotype_1_2a_str_08-6056_1196182 | Listeria_monocytogenes_1639_v135 | 0.8939 |
| Listeria_monocytogenes_serotype_1_2a_str_04-5457_1196181 | Listeria_monocytogenes_1639_v135 | 0.8975 |
| Listeria_monocytogenes_serotype_1_2a_str_02-5993_1196180 | Listeria_monocytogenes_1639_v135 | 0.8975 |
| Listeria_monocytogenes_R479a_1437838                     | Listeria_monocytogenes_1639_v135 | 0.8965 |
| Listeria_monocytogenes_N53-1_1234142                     | Listeria_monocytogenes_1639_v135 | 0.8782 |
| Listeria_monocytogenes_M7_1030009                        | Listeria_monocytogenes_1639_v135 | 0.9748 |
| Listeria_monocytogenes_LO28_393132                       | Listeria_monocytogenes_1639_v135 | 0.913  |
| Listeria_monocytogenes_L99_563174                        | Listeria_monocytogenes_1639_v135 | 0.9751 |
| Listeria_monocytogenes_L312_882094                       | Listeria_monocytogenes_1639_v135 | 0.9272 |
| Listeria_monocytogenes_J1816_930781                      | Listeria_monocytogenes_1639_v135 | 0.9109 |
| Listeria_monocytogenes_J1-220_930782                     | Listeria_monocytogenes_1639_v135 | 0.9156 |
| Listeria_monocytogenes_J0161_393130                      | Listeria_monocytogenes_1639_v135 | 0.9201 |
| Listeria_monocytogenes_HCC23_552536                      | Listeria_monocytogenes_1639_v135 | 0.9744 |
| Listeria_monocytogenes_FSL_R2-561_393126                 | Listeria_monocytogenes_1639_v135 | 0.9059 |
| Listeria_monocytogenes_FSL_J1-208_393119                 | Listeria_monocytogenes_1639_v135 | 0.9088 |
| Listeria_monocytogenes_FSL_J1-175_393118                 | Listeria_monocytogenes_1639_v135 | 0.9123 |
| Listeria_monocytogenes_Finland_1998_393127               | Listeria_monocytogenes_1639_v135 | 0.9235 |
| Listeria_monocytogenes_EGD-e_169963_v1                   | Listeria_monocytogenes_1639_v135 | 0.9253 |
| Listeria_monocytogenes_EGD-e_169963                      | Listeria_monocytogenes_1639_v135 | 0.9253 |
| Listeria_monocytogenes_EGD_1334565                       | Listeria_monocytogenes_1639_v135 | 0.9126 |
| Listeria_monocytogenes_CFSAN002349_1299895               | Listeria_monocytogenes_1639_v135 | 0.9213 |
| Listeria_monocytogenes_ATCC_19117_882095_v1              | Listeria_monocytogenes_1639_v135 | 0.9211 |
| Listeria_monocytogenes_ATCC_19117_882095                 | Listeria_monocytogenes_1639_v135 | 0.9207 |
| Listeria_monocytogenes_6179_1288295                      | Listeria_monocytogenes_1639_v135 | 0.9076 |
| Listeria_monocytogenes_1639_v9                           | Listeria_monocytogenes_1639_v135 | 0.8954 |
| Listeria_monocytogenes_1639_v99                          | Listeria_monocytogenes_1639_v135 | 0.9139 |
| Listeria_monocytogenes_1639_v98                          | Listeria_monocytogenes_1639_v135 | 0.9182 |
| Listeria_monocytogenes_1639_v97                          | Listeria_monocytogenes_1639_v135 | 0.9169 |
| Listeria_monocytogenes_1639_v96                          | Listeria_monocytogenes_1639_v135 | 0.9117 |
| Listeria_monocytogenes_1639_v95                          | Listeria_monocytogenes_1639_v135 | 0.9117 |
| Listeria_monocytogenes_1639_v94                          | Listeria_monocytogenes_1639_v135 | 0.9124 |
| Listeria_monocytogenes_1639_v93                          | Listeria_monocytogenes_1639_v135 | 0.8993 |
| Listeria_monocytogenes_1639_v92                          | Listeria_monocytogenes_1639_v135 | 0.9139 |
| Listeria_monocytogenes_1639_v91                          | Listeria_monocytogenes_1639_v135 | 0.9167 |
| Listeria_monocytogenes_1639_v90                          | Listeria_monocytogenes_1639_v135 | 0.9182 |
| Listeria_monocytogenes_1639_v8                           | Listeria_monocytogenes_1639_v135 | 0.8896 |
| Listeria_monocytogenes_1639_v89                          | Listeria_monocytogenes_1639_v135 | 0.9241 |
| Listeria_monocytogenes_1639_v88                          | Listeria_monocytogenes_1639_v135 | 0.9082 |
| Listeria_monocytogenes_1639_v87                          | Listeria_monocytogenes_1639_v135 | 0.9112 |
| Listeria_monocytogenes_1639_v86                          | Listeria_monocytogenes_1639_v135 | 0.9112 |
| Listeria_monocytogenes_1639_v85                          | Listeria_monocytogenes_1639_v135 | 0.923  |
| Listeria_monocytogenes_1639_v84                          | Listeria_monocytogenes_1639_v135 | 0.9136 |
| Listeria_monocytogenes_1639_v83                          | Listeria_monocytogenes_1639_v135 | 0.9227 |
| Listeria_monocytogenes_1639_v82                          | Listeria_monocytogenes_1639_v135 | 0.922  |
| Listeria_monocytogenes_1639_v81                          | Listeria_monocytogenes_1639_v135 | 0.9108 |
| Listeria_monocytogenes_1639_v80                          | Listeria_monocytogenes_1639_v135 | 0.9166 |
| Listeria_monocytogenes_1639_v7                           | Listeria_monocytogenes_1639_v135 | 0.8896 |
| Listeria_monocytogenes_1639_v79                          | Listeria_monocytogenes_1639_v135 | 0.9091 |
| Listeria_monocytogenes_1639_v78                          | Listeria_monocytogenes_1639_v135 | 0.9094 |
| Listeria_monocytogenes_1639_v77                          | Listeria_monocytogenes_1639_v135 | 0.9082 |
| Listeria_monocytogenes_1639_v76                          | Listeria_monocytogenes_1639_v135 | 0.9033 |
| Listeria_monocytogenes_1639_v75                          | Listeria_monocytogenes_1639_v135 | 0.9751 |
| Listeria_monocytogenes_1639_v74                          | Listeria_monocytogenes_1639_v135 | 0.9085 |
| Listeria_monocytogenes_1639_v73                          | Listeria_monocytogenes_1639_v135 | 0.9079 |
| Listeria_monocytogenes_1639_v72                          | Listeria_monocytogenes_1639_v135 | 0.9208 |
| Listeria_monocytogenes_1639_v71                          | Listeria_monocytogenes_1639_v135 | 0.8959 |
| Listeria_monocytogenes_1639_v70                          | Listeria_monocytogenes_1639_v135 | 0.9043 |
| Listeria_monocytogenes_1639_v6                           | Listeria_monocytogenes_1639_v135 | 0.8893 |
| Listeria_monocytogenes_1639_v69                          | Listeria_monocytogenes_1639_v135 | 0.9228 |
| Listeria_monocytogenes_1639_v68                          | Listeria_monocytogenes_1639_v135 | 0.9243 |
| Listeria_monocytogenes_1639_v67                          | Listeria_monocytogenes_1639_v135 | 0.9078 |
| Listeria_monocytogenes_1639_v66                          | Listeria_monocytogenes_1639_v135 | 0.9099 |
| Listeria_monocytogenes_1639_v65                          | Listeria_monocytogenes_1639_v135 | 0.908  |
| Listeria_monocytogenes_1639_v64                          | Listeria_monocytogenes_1639_v135 | 0.9143 |
| Listeria_monocytogenes_1639_v63                          | Listeria_monocytogenes_1639_v135 | 0.9053 |
| Listeria_monocytogenes_1639_v62                          | Listeria_monocytogenes_1639_v135 | 0.9067 |
| Listeria_monocytogenes_1639_v61                          | Listeria_monocytogenes_1639_v135 | 0.9013 |
| Listeria_monocytogenes_1639_v60                          | Listeria_monocytogenes_1639_v135 | 0.9153 |
| Listeria_monocytogenes_1639_v5                           | Listeria_monocytogenes_1639_v135 | 0.8814 |
| Listeria_monocytogenes_1639_v59                          | Listeria_monocytogenes_1639_v135 | 0.9126 |
| Listeria_monocytogenes_1639_v58                          | Listeria_monocytogenes_1639_v135 | 0.9235 |
| Listeria_monocytogenes_1639_v57                          | Listeria_monocytogenes_1639_v135 | 0.9091 |
| Listeria_monocytogenes_1639_v56                          | Listeria_monocytogenes_1639_v135 | 0.9167 |
| Listeria_monocytogenes_1639_v55                          | Listeria_monocytogenes_1639_v135 | 0.9139 |
| Listeria_monocytogenes_1639_v54                          | Listeria_monocytogenes_1639_v135 | 0.904  |
| Listeria_monocytogenes_1639_v53                          | Listeria_monocytogenes_1639_v135 | 0.9149 |
| Listeria_monocytogenes_1639_v52                          | Listeria_monocytogenes_1639_v135 | 0.9185 |
| Listeria_monocytogenes_1639_v51                          | Listeria_monocytogenes_1639_v135 | 0.9198 |
| Listeria_monocytogenes_1639_v50                          | Listeria_monocytogenes_1639_v135 | 0.8964 |
| Listeria_monocytogenes_1639_v4                           | Listeria_monocytogenes_1639_v135 | 0.8931 |
| Listeria_monocytogenes_1639_v49                          | Listeria_monocytogenes_1639_v135 | 0.9121 |
| Listeria_monocytogenes_1639_v48                          | Listeria_monocytogenes_1639_v135 | 0.903  |
| Listeria_monocytogenes_1639_v47                          | Listeria_monocytogenes_1639_v135 | 0.8976 |
| Listeria_monocytogenes_1639_v46                          | Listeria_monocytogenes_1639_v135 | 0.9161 |
| Listeria_monocytogenes_1639_v45                          | Listeria_monocytogenes_1639_v135 | 0.8894 |
| Listeria_monocytogenes_1639_v44                          | Listeria_monocytogenes_1639_v135 | 0.8975 |
| Listeria_monocytogenes_1639_v43                          | Listeria_monocytogenes_1639_v135 | 0.8975 |
| Listeria_monocytogenes_1639_v42                          | Listeria_monocytogenes_1639_v135 | 0.9073 |
| Listeria_monocytogenes_1639_v41                          | Listeria_monocytogenes_1639_v135 | 0.8909 |
| Listeria_monocytogenes_1639_v40                          | Listeria_monocytogenes_1639_v135 | 0.9066 |

[illegible]



[illegible]

|                                                          |                                  |        |
|----------------------------------------------------------|----------------------------------|--------|
| Listeria_monocytogenes_1639_v189                         | Listeria_monocytogenes_1639_v136 | 0.9627 |
| Listeria_monocytogenes_1639_v188                         | Listeria_monocytogenes_1639_v136 | 0.9622 |
| Listeria_monocytogenes_1639_v187                         | Listeria_monocytogenes_1639_v136 | 0.9638 |
| Listeria_monocytogenes_1639_v186                         | Listeria_monocytogenes_1639_v136 | 0.9634 |
| Listeria_monocytogenes_1639_v185                         | Listeria_monocytogenes_1639_v136 | 0.9638 |
| Listeria_monocytogenes_1639_v184                         | Listeria_monocytogenes_1639_v136 | 0.9634 |
| Listeria_monocytogenes_1639_v183                         | Listeria_monocytogenes_1639_v136 | 0.9611 |
| Listeria_monocytogenes_1639_v182                         | Listeria_monocytogenes_1639_v136 | 0.9634 |
| Listeria_monocytogenes_1639_v181                         | Listeria_monocytogenes_1639_v136 | 0.9201 |
| Listeria_monocytogenes_1639_v180                         | Listeria_monocytogenes_1639_v136 | 0.9201 |
| Listeria_monocytogenes_1639_v17                          | Listeria_monocytogenes_1639_v136 | 0.9174 |
| Listeria_monocytogenes_1639_v179                         | Listeria_monocytogenes_1639_v136 | 0.9513 |
| Listeria_monocytogenes_1639_v178                         | Listeria_monocytogenes_1639_v136 | 0.9631 |
| Listeria_monocytogenes_1639_v177                         | Listeria_monocytogenes_1639_v136 | 0.9416 |
| Listeria_monocytogenes_1639_v176                         | Listeria_monocytogenes_1639_v136 | 0.9336 |
| Listeria_monocytogenes_1639_v175                         | Listeria_monocytogenes_1639_v136 | 0.9699 |
| Listeria_monocytogenes_1639_v174                         | Listeria_monocytogenes_1639_v136 | 0.9624 |
| Listeria_monocytogenes_1639_v173                         | Listeria_monocytogenes_1639_v136 | 0.9497 |
| Listeria_monocytogenes_1639_v172                         | Listeria_monocytogenes_1639_v136 | 0.9354 |
| Listeria_monocytogenes_1639_v171                         | Listeria_monocytogenes_1639_v136 | 0.9512 |
| Listeria_monocytogenes_1639_v170                         | Listeria_monocytogenes_1639_v136 | 0.9595 |
| Listeria_monocytogenes_1639_v16                          | Listeria_monocytogenes_1639_v136 | 0.9372 |
| Listeria_monocytogenes_1639_v169                         | Listeria_monocytogenes_1639_v136 | 0.9844 |
| Listeria_monocytogenes_1639_v168                         | Listeria_monocytogenes_1639_v136 | 0.957  |
| Listeria_monocytogenes_1639_v167                         | Listeria_monocytogenes_1639_v136 | 0.9534 |
| Listeria_monocytogenes_1639_v166                         | Listeria_monocytogenes_1639_v136 | 0.9574 |
| Listeria_monocytogenes_1639_v165                         | Listeria_monocytogenes_1639_v136 | 0.9844 |
| Listeria_monocytogenes_1639_v164                         | Listeria_monocytogenes_1639_v136 | 0.9395 |
| Listeria_monocytogenes_1639_v163                         | Listeria_monocytogenes_1639_v136 | 0.9423 |
| Listeria_monocytogenes_1639_v162                         | Listeria_monocytogenes_1639_v136 | 0.9395 |
| Listeria_monocytogenes_1639_v161                         | Listeria_monocytogenes_1639_v136 | 0.9403 |
| Listeria_monocytogenes_1639_v160                         | Listeria_monocytogenes_1639_v136 | 0.94   |
| Listeria_monocytogenes_1639_v15                          | Listeria_monocytogenes_1639_v136 | 0.9276 |
| Listeria_monocytogenes_1639_v159                         | Listeria_monocytogenes_1639_v136 | 0.9416 |
| Listeria_monocytogenes_1639_v158                         | Listeria_monocytogenes_1639_v136 | 0.94   |
| Listeria_monocytogenes_1639_v157                         | Listeria_monocytogenes_1639_v136 | 0.94   |
| Listeria_monocytogenes_1639_v156                         | Listeria_monocytogenes_1639_v136 | 0.9418 |
| Listeria_monocytogenes_1639_v155                         | Listeria_monocytogenes_1639_v136 | 0.954  |
| Listeria_monocytogenes_1639_v154                         | Listeria_monocytogenes_1639_v136 | 0.9681 |
| Listeria_monocytogenes_1639_v153                         | Listeria_monocytogenes_1639_v136 | 0.9513 |
| Listeria_monocytogenes_1639_v152                         | Listeria_monocytogenes_1639_v136 | 0.9416 |
| Listeria_monocytogenes_1639_v151                         | Listeria_monocytogenes_1639_v136 | 0.9416 |
| Listeria_monocytogenes_1639_v150                         | Listeria_monocytogenes_1639_v136 | 0.9673 |
| Listeria_monocytogenes_1639_v14                          | Listeria_monocytogenes_1639_v136 | 0.9215 |
| Listeria_monocytogenes_1639_v149                         | Listeria_monocytogenes_1639_v136 | 0.9658 |
| Listeria_monocytogenes_1639_v148                         | Listeria_monocytogenes_1639_v136 | 0.9405 |
| Listeria_monocytogenes_1639_v147                         | Listeria_monocytogenes_1639_v136 | 0.9271 |
| Listeria_monocytogenes_1639_v146                         | Listeria_monocytogenes_1639_v136 | 0.9617 |
| Listeria_monocytogenes_1639_v145                         | Listeria_monocytogenes_1639_v136 | 0.9572 |
| Listeria_monocytogenes_1639_v144                         | Listeria_monocytogenes_1639_v136 | 0.9426 |
| Listeria_monocytogenes_1639_v143                         | Listeria_monocytogenes_1639_v136 | 0.9682 |
| Listeria_monocytogenes_1639_v142                         | Listeria_monocytogenes_1639_v136 | 0.943  |
| Listeria_monocytogenes_1639_v141                         | Listeria_monocytogenes_1639_v136 | 0.949  |
| Listeria_monocytogenes_1639_v140                         | Listeria_monocytogenes_1639_v136 | 0.9437 |
| Listeria_monocytogenes_1639_v13                          | Listeria_monocytogenes_1639_v136 | 0.9276 |
| Listeria_monocytogenes_1639_v139                         | Listeria_monocytogenes_1639_v136 | 0.9385 |
| Listeria_monocytogenes_1639_v138                         | Listeria_monocytogenes_1639_v136 | 0.9449 |
| Listeria_monocytogenes_1639_v137                         | Listeria_monocytogenes_1639_v136 | 0.9445 |
| Listeria_monocytogenes_1639_v136                         | Listeria_monocytogenes_1639_v136 | 0.0648 |
| Listeria_welshimeri_1643                                 | Listeria_monocytogenes_1639_v137 | 0.8875 |
| Listeria_welshimeri_serovar_6b_str_SLCC5334_386043       | Listeria_monocytogenes_1639_v137 | 0.8872 |
| Listeria_seeligeri_serovar_1_2b_str_SLCC3954_683837      | Listeria_monocytogenes_1639_v137 | 0.8921 |
| Listeria_seeligeri_FSL_S4-171_702452                     | Listeria_monocytogenes_1639_v137 | 0.8323 |
| Listeria_seeligeri_FSL_N1-067_702453                     | Listeria_monocytogenes_1639_v137 | 0.8322 |
| Listeria_seeligeri_1640_v1                               | Listeria_monocytogenes_1639_v137 | 0.8986 |
| Listeria_seeligeri_1640                                  | Listeria_monocytogenes_1639_v137 | 0.8897 |
| Listeria_monocytogenes_WSLC1042_1457188                  | Listeria_monocytogenes_1639_v137 | 0.9743 |
| Listeria_monocytogenes_WSLC1001_1457187                  | Listeria_monocytogenes_1639_v137 | 0.9405 |
| Listeria_monocytogenes_SLCC7179_879090                   | Listeria_monocytogenes_1639_v137 | 0.9453 |
| Listeria_monocytogenes_SLCC5850_882096                   | Listeria_monocytogenes_1639_v137 | 0.9452 |
| Listeria_monocytogenes_SLCC2755_932919                   | Listeria_monocytogenes_1639_v137 | 0.9559 |
| Listeria_monocytogenes_SLCC2540_879089                   | Listeria_monocytogenes_1639_v137 | 0.9542 |
| Listeria_monocytogenes_SLCC2479_882020                   | Listeria_monocytogenes_1639_v137 | 0.9352 |
| Listeria_monocytogenes_SLCC2378_879088                   | Listeria_monocytogenes_1639_v137 | 0.9755 |
| Listeria_monocytogenes_SLCC2376_882097                   | Listeria_monocytogenes_1639_v137 | 0.9504 |
| Listeria_monocytogenes_SLCC2372_932920                   | Listeria_monocytogenes_1639_v137 | 0.9278 |
| Listeria_monocytogenes_serotype_4b_str_LL195_1230340     | Listeria_monocytogenes_1639_v137 | 0.9819 |
| Listeria_monocytogenes_serotype_4b_str_LIS0087_1134669   | Listeria_monocytogenes_1639_v137 | 0.9211 |
| Listeria_monocytogenes_serotype_4b_str_F2365_265669      | Listeria_monocytogenes_1639_v137 | 0.9819 |
| Listeria_monocytogenes_serotype_4b_str_CLIP_80459_568819 | Listeria_monocytogenes_1639_v137 | 0.995  |
| Listeria_monocytogenes_serotype_4b_str_81-0861_1196161   | Listeria_monocytogenes_1639_v137 | 0.964  |
| Listeria_monocytogenes_serotype_4b_str_81-0592_1196160   | Listeria_monocytogenes_1639_v137 | 0.9651 |
| Listeria_monocytogenes_serotype_4b_str_81-0558_1196159   | Listeria_monocytogenes_1639_v137 | 0.9658 |
| Listeria_monocytogenes_serotype_4b_str_10-0809_1196162   | Listeria_monocytogenes_1639_v137 | 0.9655 |
| Listeria_monocytogenes_serotype_4b_str_02-6680_1196175   | Listeria_monocytogenes_1639_v137 | 0.983  |
| Listeria_monocytogenes_serotype_4b_str_02-6679_1196174   | Listeria_monocytogenes_1639_v137 | 0.983  |
| Listeria_monocytogenes_serotype_4b_str_02-1792_1196173   | Listeria_monocytogenes_1639_v137 | 0.9655 |
| Listeria_monocytogenes_serotype_4b_str_02-1289_1196172   | Listeria_monocytogenes_1639_v137 | 0.9655 |
| Listeria_monocytogenes_serotype_4b_str_02-1103_1196171   | Listeria_monocytogenes_1639_v137 | 0.9655 |
| Listeria_monocytogenes_serotype_3c_str_10-5027_1196195   | Listeria_monocytogenes_1639_v137 | 0.9344 |
| Listeria_monocytogenes_serotype_1_2c_str_10-5026_1196194 | Listeria_monocytogenes_1639_v137 | 0.9352 |

|                                                          |                                  |        |
|----------------------------------------------------------|----------------------------------|--------|
| Listeria_monocytogenes_serotype_1_2c_str_10-5025_1196193 | Listeria_monocytogenes_1639_v137 | 0.9352 |
| Listeria_monocytogenes_serotype_1_2b_str_10-0811_1196164 | Listeria_monocytogenes_1639_v137 | 0.9479 |
| Listeria_monocytogenes_serotype_1_2b_str_10-0810_1196163 | Listeria_monocytogenes_1639_v137 | 0.9479 |
| Listeria_monocytogenes_serotype_1_2a_str_99-6370_1196179 | Listeria_monocytogenes_1639_v137 | 0.926  |
| Listeria_monocytogenes_serotype_1_2a_str_98-2035_1196178 | Listeria_monocytogenes_1639_v137 | 0.926  |
| Listeria_monocytogenes_serotype_1_2a_str_95-0093_1196177 | Listeria_monocytogenes_1639_v137 | 0.9315 |
| Listeria_monocytogenes_serotype_1_2a_str_88-0478_1196176 | Listeria_monocytogenes_1639_v137 | 0.9303 |
| Listeria_monocytogenes_serotype_1_2a_str_10-5024_1196192 | Listeria_monocytogenes_1639_v137 | 0.9315 |
| Listeria_monocytogenes_serotype_1_2a_str_10-4758_1196168 | Listeria_monocytogenes_1639_v137 | 0.9449 |
| Listeria_monocytogenes_serotype_1_2a_str_10-4754_1196167 | Listeria_monocytogenes_1639_v137 | 0.9449 |
| Listeria_monocytogenes_serotype_1_2a_str_10-1321_1196191 | Listeria_monocytogenes_1639_v137 | 0.9315 |
| Listeria_monocytogenes_serotype_1_2a_str_10-1047_1196190 | Listeria_monocytogenes_1639_v137 | 0.9322 |
| Listeria_monocytogenes_serotype_1_2a_str_10-1046_1196189 | Listeria_monocytogenes_1639_v137 | 0.9322 |
| Listeria_monocytogenes_serotype_1_2a_str_10-0934_1196170 | Listeria_monocytogenes_1639_v137 | 0.9558 |
| Listeria_monocytogenes_serotype_1_2a_str_10-0933_1196169 | Listeria_monocytogenes_1639_v137 | 0.9558 |
| Listeria_monocytogenes_serotype_1_2a_str_10-0815_1196188 | Listeria_monocytogenes_1639_v137 | 0.9273 |
| Listeria_monocytogenes_serotype_1_2a_str_10-0814_1196187 | Listeria_monocytogenes_1639_v137 | 0.9319 |
| Listeria_monocytogenes_serotype_1_2a_str_10-0813_1196166 | Listeria_monocytogenes_1639_v137 | 0.938  |
| Listeria_monocytogenes_serotype_1_2a_str_10-0812_1196165 | Listeria_monocytogenes_1639_v137 | 0.938  |
| Listeria_monocytogenes_serotype_1_2a_str_08-7669_1196186 | Listeria_monocytogenes_1639_v137 | 0.941  |
| Listeria_monocytogenes_serotype_1_2a_str_08-7374_1196185 | Listeria_monocytogenes_1639_v137 | 0.9315 |
| Listeria_monocytogenes_serotype_1_2a_str_08-6997_1196184 | Listeria_monocytogenes_1639_v137 | 0.9273 |
| Listeria_monocytogenes_serotype_1_2a_str_08-6569_1196183 | Listeria_monocytogenes_1639_v137 | 0.9273 |
| Listeria_monocytogenes_serotype_1_2a_str_08-6056_1196182 | Listeria_monocytogenes_1639_v137 | 0.9273 |
| Listeria_monocytogenes_serotype_1_2a_str_04-5457_1196181 | Listeria_monocytogenes_1639_v137 | 0.9315 |
| Listeria_monocytogenes_serotype_1_2a_str_02-5993_1196180 | Listeria_monocytogenes_1639_v137 | 0.9315 |
| Listeria_monocytogenes_R479a_1437838                     | Listeria_monocytogenes_1639_v137 | 0.9308 |
| Listeria_monocytogenes_N53-1_1234142                     | Listeria_monocytogenes_1639_v137 | 0.8999 |
| Listeria_monocytogenes_M7_1030009                        | Listeria_monocytogenes_1639_v137 | 0.9132 |
| Listeria_monocytogenes_LO28_393132                       | Listeria_monocytogenes_1639_v137 | 0.9338 |
| Listeria_monocytogenes_L99_563174                        | Listeria_monocytogenes_1639_v137 | 0.9135 |
| Listeria_monocytogenes_L312_882094                       | Listeria_monocytogenes_1639_v137 | 0.9954 |
| Listeria_monocytogenes_J1816_930781                      | Listeria_monocytogenes_1639_v137 | 0.9588 |
| Listeria_monocytogenes_J1-220_930782                     | Listeria_monocytogenes_1639_v137 | 0.9548 |
| Listeria_monocytogenes_J0161_393130                      | Listeria_monocytogenes_1639_v137 | 0.9353 |
| Listeria_monocytogenes_HCC23_552536                      | Listeria_monocytogenes_1639_v137 | 0.9128 |
| Listeria_monocytogenes_FSL_R2-561_393126                 | Listeria_monocytogenes_1639_v137 | 0.9338 |
| Listeria_monocytogenes_FSL_J1-208_393119                 | Listeria_monocytogenes_1639_v137 | 0.9237 |
| Listeria_monocytogenes_FSL_J1-175_393118                 | Listeria_monocytogenes_1639_v137 | 0.9598 |
| Listeria_monocytogenes_Finland_1998_393127               | Listeria_monocytogenes_1639_v137 | 0.9554 |
| Listeria_monocytogenes_EGD-e_169963_v1                   | Listeria_monocytogenes_1639_v137 | 0.9427 |
| Listeria_monocytogenes_EGD-e_169963                      | Listeria_monocytogenes_1639_v137 | 0.943  |
| Listeria_monocytogenes_EGD_1334565                       | Listeria_monocytogenes_1639_v137 | 0.9459 |
| Listeria_monocytogenes_CFSAN002349_1299895               | Listeria_monocytogenes_1639_v137 | 0.9827 |
| Listeria_monocytogenes_ATCC_19117_882095_v1              | Listeria_monocytogenes_1639_v137 | 0.975  |
| Listeria_monocytogenes_ATCC_19117_882095                 | Listeria_monocytogenes_1639_v137 | 0.9746 |
| Listeria_monocytogenes_6179_1288295                      | Listeria_monocytogenes_1639_v137 | 0.9176 |
| Listeria_monocytogenes_1639_v9                           | Listeria_monocytogenes_1639_v137 | 0.9304 |
| Listeria_monocytogenes_1639_v99                          | Listeria_monocytogenes_1639_v137 | 0.9603 |
| Listeria_monocytogenes_1639_v98                          | Listeria_monocytogenes_1639_v137 | 0.9326 |
| Listeria_monocytogenes_1639_v97                          | Listeria_monocytogenes_1639_v137 | 0.9699 |
| Listeria_monocytogenes_1639_v96                          | Listeria_monocytogenes_1639_v137 | 0.9592 |
| Listeria_monocytogenes_1639_v95                          | Listeria_monocytogenes_1639_v137 | 0.9592 |
| Listeria_monocytogenes_1639_v94                          | Listeria_monocytogenes_1639_v137 | 0.96   |
| Listeria_monocytogenes_1639_v93                          | Listeria_monocytogenes_1639_v137 | 0.9303 |
| Listeria_monocytogenes_1639_v92                          | Listeria_monocytogenes_1639_v137 | 0.96   |
| Listeria_monocytogenes_1639_v91                          | Listeria_monocytogenes_1639_v137 | 0.9629 |
| Listeria_monocytogenes_1639_v90                          | Listeria_monocytogenes_1639_v137 | 0.9326 |
| Listeria_monocytogenes_1639_v8                           | Listeria_monocytogenes_1639_v137 | 0.9201 |
| Listeria_monocytogenes_1639_v89                          | Listeria_monocytogenes_1639_v137 | 0.9694 |
| Listeria_monocytogenes_1639_v88                          | Listeria_monocytogenes_1639_v137 | 0.9362 |
| Listeria_monocytogenes_1639_v87                          | Listeria_monocytogenes_1639_v137 | 0.9334 |
| Listeria_monocytogenes_1639_v86                          | Listeria_monocytogenes_1639_v137 | 0.933  |
| Listeria_monocytogenes_1639_v85                          | Listeria_monocytogenes_1639_v137 | 0.9632 |
| Listeria_monocytogenes_1639_v84                          | Listeria_monocytogenes_1639_v137 | 0.9414 |
| Listeria_monocytogenes_1639_v83                          | Listeria_monocytogenes_1639_v137 | 0.9635 |
| Listeria_monocytogenes_1639_v82                          | Listeria_monocytogenes_1639_v137 | 0.9628 |
| Listeria_monocytogenes_1639_v81                          | Listeria_monocytogenes_1639_v137 | 0.9354 |
| Listeria_monocytogenes_1639_v80                          | Listeria_monocytogenes_1639_v137 | 0.9524 |
| Listeria_monocytogenes_1639_v7                           | Listeria_monocytogenes_1639_v137 | 0.9201 |
| Listeria_monocytogenes_1639_v79                          | Listeria_monocytogenes_1639_v137 | 0.9336 |
| Listeria_monocytogenes_1639_v78                          | Listeria_monocytogenes_1639_v137 | 0.9347 |
| Listeria_monocytogenes_1639_v77                          | Listeria_monocytogenes_1639_v137 | 0.9344 |
| Listeria_monocytogenes_1639_v76                          | Listeria_monocytogenes_1639_v137 | 0.9288 |
| Listeria_monocytogenes_1639_v75                          | Listeria_monocytogenes_1639_v137 | 0.9135 |
| Listeria_monocytogenes_1639_v74                          | Listeria_monocytogenes_1639_v137 | 0.9319 |
| Listeria_monocytogenes_1639_v73                          | Listeria_monocytogenes_1639_v137 | 0.9289 |
| Listeria_monocytogenes_1639_v72                          | Listeria_monocytogenes_1639_v137 | 0.9627 |
| Listeria_monocytogenes_1639_v71                          | Listeria_monocytogenes_1639_v137 | 0.92   |
| Listeria_monocytogenes_1639_v70                          | Listeria_monocytogenes_1639_v137 | 0.9313 |
| Listeria_monocytogenes_1639_v6                           | Listeria_monocytogenes_1639_v137 | 0.9197 |
| Listeria_monocytogenes_1639_v69                          | Listeria_monocytogenes_1639_v137 | 0.9651 |
| Listeria_monocytogenes_1639_v68                          | Listeria_monocytogenes_1639_v137 | 0.9392 |
| Listeria_monocytogenes_1639_v67                          | Listeria_monocytogenes_1639_v137 | 0.9517 |
| Listeria_monocytogenes_1639_v66                          | Listeria_monocytogenes_1639_v137 | 0.9404 |
| Listeria_monocytogenes_1639_v65                          | Listeria_monocytogenes_1639_v137 | 0.9347 |
| Listeria_monocytogenes_1639_v64                          | Listeria_monocytogenes_1639_v137 | 0.9347 |
| Listeria_monocytogenes_1639_v63                          | Listeria_monocytogenes_1639_v137 | 0.9486 |
| Listeria_monocytogenes_1639_v62                          | Listeria_monocytogenes_1639_v137 | 0.9312 |
| Listeria_monocytogenes_1639_v61                          | Listeria_monocytogenes_1639_v137 | 0.9343 |
| Listeria_monocytogenes_1639_v60                          | Listeria_monocytogenes_1639_v137 | 0.9373 |



















|                                                          |                                 |        |
|----------------------------------------------------------|---------------------------------|--------|
| Listeria_monocytogenes_serotype_1_2a_str_08-7374_1196185 | Listeria_monocytogenes_1639_v13 | 0.9197 |
| Listeria_monocytogenes_serotype_1_2a_str_08-6997_1196184 | Listeria_monocytogenes_1639_v13 | 0.9161 |
| Listeria_monocytogenes_serotype_1_2a_str_08-6569_1196183 | Listeria_monocytogenes_1639_v13 | 0.9161 |
| Listeria_monocytogenes_serotype_1_2a_str_08-6056_1196182 | Listeria_monocytogenes_1639_v13 | 0.9161 |
| Listeria_monocytogenes_serotype_1_2a_str_04-5457_1196181 | Listeria_monocytogenes_1639_v13 | 0.9197 |
| Listeria_monocytogenes_serotype_1_2a_str_02-5993_1196180 | Listeria_monocytogenes_1639_v13 | 0.9193 |
| Listeria_monocytogenes_R479a_1437838                     | Listeria_monocytogenes_1639_v13 | 0.9248 |
| Listeria_monocytogenes_N53-1_1234142                     | Listeria_monocytogenes_1639_v13 | 0.8774 |
| Listeria_monocytogenes_M7_1030009                        | Listeria_monocytogenes_1639_v13 | 0.9017 |
| Listeria_monocytogenes_LO28_393132                       | Listeria_monocytogenes_1639_v13 | 0.9309 |
| Listeria_monocytogenes_L99_563174                        | Listeria_monocytogenes_1639_v13 | 0.9024 |
| Listeria_monocytogenes_L312_882094                       | Listeria_monocytogenes_1639_v13 | 0.9313 |
| Listeria_monocytogenes_J1816_930781                      | Listeria_monocytogenes_1639_v13 | 0.9218 |
| Listeria_monocytogenes_J1-220_930782                     | Listeria_monocytogenes_1639_v13 | 0.9298 |
| Listeria_monocytogenes_J0161_393130                      | Listeria_monocytogenes_1639_v13 | 0.9229 |
| Listeria_monocytogenes_HCC23_552536                      | Listeria_monocytogenes_1639_v13 | 0.9017 |
| Listeria_monocytogenes_FSL_R2-561_393126                 | Listeria_monocytogenes_1639_v13 | 0.9232 |
| Listeria_monocytogenes_FSL_J1-208_393119                 | Listeria_monocytogenes_1639_v13 | 0.8821 |
| Listeria_monocytogenes_FSL_J1-175_393118                 | Listeria_monocytogenes_1639_v13 | 0.9418 |
| Listeria_monocytogenes_Finland_1998_393127               | Listeria_monocytogenes_1639_v13 | 0.9214 |
| Listeria_monocytogenes_EGD-e_169963_v1                   | Listeria_monocytogenes_1639_v13 | 0.9266 |
| Listeria_monocytogenes_EGD-e_169963                      | Listeria_monocytogenes_1639_v13 | 0.9269 |
| Listeria_monocytogenes_EGD_1334565                       | Listeria_monocytogenes_1639_v13 | 0.9248 |
| Listeria_monocytogenes_CFSAN002349_1299895               | Listeria_monocytogenes_1639_v13 | 0.9319 |
| Listeria_monocytogenes_ATCC_19117_882095_v1              | Listeria_monocytogenes_1639_v13 | 0.9254 |
| Listeria_monocytogenes_ATCC_19117_882095                 | Listeria_monocytogenes_1639_v13 | 0.9253 |
| Listeria_monocytogenes_6179_1288295                      | Listeria_monocytogenes_1639_v13 | 0.9254 |
| Listeria_monocytogenes_1639_v9                           | Listeria_monocytogenes_1639_v13 | 0.9538 |
| Listeria_monocytogenes_1639_v99                          | Listeria_monocytogenes_1639_v13 | 0.9306 |
| Listeria_monocytogenes_1639_v98                          | Listeria_monocytogenes_1639_v13 | 0.9202 |
| Listeria_monocytogenes_1639_v97                          | Listeria_monocytogenes_1639_v13 | 0.9231 |
| Listeria_monocytogenes_1639_v96                          | Listeria_monocytogenes_1639_v13 | 0.931  |
| Listeria_monocytogenes_1639_v95                          | Listeria_monocytogenes_1639_v13 | 0.931  |
| Listeria_monocytogenes_1639_v94                          | Listeria_monocytogenes_1639_v13 | 0.931  |
| Listeria_monocytogenes_1639_v93                          | Listeria_monocytogenes_1639_v13 | 0.9258 |
| Listeria_monocytogenes_1639_v92                          | Listeria_monocytogenes_1639_v13 | 0.9313 |
| Listeria_monocytogenes_1639_v91                          | Listeria_monocytogenes_1639_v13 | 0.9341 |
| Listeria_monocytogenes_1639_v90                          | Listeria_monocytogenes_1639_v13 | 0.9202 |
| Listeria_monocytogenes_1639_v8                           | Listeria_monocytogenes_1639_v13 | 0.9149 |
| Listeria_monocytogenes_1639_v89                          | Listeria_monocytogenes_1639_v13 | 0.9357 |
| Listeria_monocytogenes_1639_v88                          | Listeria_monocytogenes_1639_v13 | 0.923  |
| Listeria_monocytogenes_1639_v87                          | Listeria_monocytogenes_1639_v13 | 0.9269 |
| Listeria_monocytogenes_1639_v86                          | Listeria_monocytogenes_1639_v13 | 0.9262 |
| Listeria_monocytogenes_1639_v85                          | Listeria_monocytogenes_1639_v13 | 0.929  |
| Listeria_monocytogenes_1639_v84                          | Listeria_monocytogenes_1639_v13 | 0.9235 |
| Listeria_monocytogenes_1639_v83                          | Listeria_monocytogenes_1639_v13 | 0.932  |
| Listeria_monocytogenes_1639_v82                          | Listeria_monocytogenes_1639_v13 | 0.9317 |
| Listeria_monocytogenes_1639_v81                          | Listeria_monocytogenes_1639_v13 | 0.9233 |
| Listeria_monocytogenes_1639_v80                          | Listeria_monocytogenes_1639_v13 | 0.9645 |
| Listeria_monocytogenes_1639_v7                           | Listeria_monocytogenes_1639_v13 | 0.9149 |
| Listeria_monocytogenes_1639_v79                          | Listeria_monocytogenes_1639_v13 | 0.9198 |
| Listeria_monocytogenes_1639_v78                          | Listeria_monocytogenes_1639_v13 | 0.9241 |
| Listeria_monocytogenes_1639_v77                          | Listeria_monocytogenes_1639_v13 | 0.9106 |
| Listeria_monocytogenes_1639_v76                          | Listeria_monocytogenes_1639_v13 | 0.9196 |
| Listeria_monocytogenes_1639_v75                          | Listeria_monocytogenes_1639_v13 | 0.9024 |
| Listeria_monocytogenes_1639_v74                          | Listeria_monocytogenes_1639_v13 | 0.9149 |
| Listeria_monocytogenes_1639_v73                          | Listeria_monocytogenes_1639_v13 | 0.9367 |
| Listeria_monocytogenes_1639_v72                          | Listeria_monocytogenes_1639_v13 | 0.9261 |
| Listeria_monocytogenes_1639_v71                          | Listeria_monocytogenes_1639_v13 | 0.913  |
| Listeria_monocytogenes_1639_v70                          | Listeria_monocytogenes_1639_v13 | 0.9271 |
| Listeria_monocytogenes_1639_v6                           | Listeria_monocytogenes_1639_v13 | 0.9142 |
| Listeria_monocytogenes_1639_v69                          | Listeria_monocytogenes_1639_v13 | 0.9292 |
| Listeria_monocytogenes_1639_v68                          | Listeria_monocytogenes_1639_v13 | 0.9196 |
| Listeria_monocytogenes_1639_v67                          | Listeria_monocytogenes_1639_v13 | 0.9394 |
| Listeria_monocytogenes_1639_v66                          | Listeria_monocytogenes_1639_v13 | 0.9236 |
| Listeria_monocytogenes_1639_v65                          | Listeria_monocytogenes_1639_v13 | 0.9307 |
| Listeria_monocytogenes_1639_v64                          | Listeria_monocytogenes_1639_v13 | 0.9179 |
| Listeria_monocytogenes_1639_v63                          | Listeria_monocytogenes_1639_v13 | 0.9593 |
| Listeria_monocytogenes_1639_v62                          | Listeria_monocytogenes_1639_v13 | 0.9218 |
| Listeria_monocytogenes_1639_v61                          | Listeria_monocytogenes_1639_v13 | 0.9212 |
| Listeria_monocytogenes_1639_v60                          | Listeria_monocytogenes_1639_v13 | 0.916  |
| Listeria_monocytogenes_1639_v5                           | Listeria_monocytogenes_1639_v13 | 0.9559 |
| Listeria_monocytogenes_1639_v59                          | Listeria_monocytogenes_1639_v13 | 0.9269 |
| Listeria_monocytogenes_1639_v58                          | Listeria_monocytogenes_1639_v13 | 0.9313 |
| Listeria_monocytogenes_1639_v57                          | Listeria_monocytogenes_1639_v13 | 0.9378 |
| Listeria_monocytogenes_1639_v56                          | Listeria_monocytogenes_1639_v13 | 0.9225 |
| Listeria_monocytogenes_1639_v55                          | Listeria_monocytogenes_1639_v13 | 0.9319 |
| Listeria_monocytogenes_1639_v54                          | Listeria_monocytogenes_1639_v13 | 0.8974 |
| Listeria_monocytogenes_1639_v53                          | Listeria_monocytogenes_1639_v13 | 0.9083 |
| Listeria_monocytogenes_1639_v52                          | Listeria_monocytogenes_1639_v13 | 0.9341 |
| Listeria_monocytogenes_1639_v51                          | Listeria_monocytogenes_1639_v13 | 0.9335 |
| Listeria_monocytogenes_1639_v50                          | Listeria_monocytogenes_1639_v13 | 0.9186 |
| Listeria_monocytogenes_1639_v4                           | Listeria_monocytogenes_1639_v13 | 0.9691 |
| Listeria_monocytogenes_1639_v49                          | Listeria_monocytogenes_1639_v13 | 0.919  |
| Listeria_monocytogenes_1639_v48                          | Listeria_monocytogenes_1639_v13 | 0.9251 |
| Listeria_monocytogenes_1639_v47                          | Listeria_monocytogenes_1639_v13 | 0.9175 |
| Listeria_monocytogenes_1639_v46                          | Listeria_monocytogenes_1639_v13 | 0.912  |
| Listeria_monocytogenes_1639_v45                          | Listeria_monocytogenes_1639_v13 | 0.9173 |
| Listeria_monocytogenes_1639_v44                          | Listeria_monocytogenes_1639_v13 | 0.9197 |
| Listeria_monocytogenes_1639_v43                          | Listeria_monocytogenes_1639_v13 | 0.9197 |
| Listeria_monocytogenes_1639_v42                          | Listeria_monocytogenes_1639_v13 | 0.9014 |





[illegible]

|                                                          |                                  |        |
|----------------------------------------------------------|----------------------------------|--------|
| Listeria_monocytogenes_1639_v186                         | Listeria_monocytogenes_1639_v140 | 0.9557 |
| Listeria_monocytogenes_1639_v185                         | Listeria_monocytogenes_1639_v140 | 0.9557 |
| Listeria_monocytogenes_1639_v184                         | Listeria_monocytogenes_1639_v140 | 0.9545 |
| Listeria_monocytogenes_1639_v183                         | Listeria_monocytogenes_1639_v140 | 0.9529 |
| Listeria_monocytogenes_1639_v182                         | Listeria_monocytogenes_1639_v140 | 0.9552 |
| Listeria_monocytogenes_1639_v181                         | Listeria_monocytogenes_1639_v140 | 0.9411 |
| Listeria_monocytogenes_1639_v180                         | Listeria_monocytogenes_1639_v140 | 0.9411 |
| Listeria_monocytogenes_1639_v17                          | Listeria_monocytogenes_1639_v140 | 0.9484 |
| Listeria_monocytogenes_1639_v179                         | Listeria_monocytogenes_1639_v140 | 0.94   |
| Listeria_monocytogenes_1639_v178                         | Listeria_monocytogenes_1639_v140 | 0.9537 |
| Listeria_monocytogenes_1639_v177                         | Listeria_monocytogenes_1639_v140 | 0.9776 |
| Listeria_monocytogenes_1639_v176                         | Listeria_monocytogenes_1639_v140 | 0.9485 |
| Listeria_monocytogenes_1639_v175                         | Listeria_monocytogenes_1639_v140 | 0.9438 |
| Listeria_monocytogenes_1639_v174                         | Listeria_monocytogenes_1639_v140 | 0.9557 |
| Listeria_monocytogenes_1639_v173                         | Listeria_monocytogenes_1639_v140 | 0.9713 |
| Listeria_monocytogenes_1639_v172                         | Listeria_monocytogenes_1639_v140 | 0.9463 |
| Listeria_monocytogenes_1639_v171                         | Listeria_monocytogenes_1639_v140 | 0.9407 |
| Listeria_monocytogenes_1639_v170                         | Listeria_monocytogenes_1639_v140 | 0.949  |
| Listeria_monocytogenes_1639_v16                          | Listeria_monocytogenes_1639_v140 | 0.9158 |
| Listeria_monocytogenes_1639_v169                         | Listeria_monocytogenes_1639_v140 | 0.9514 |
| Listeria_monocytogenes_1639_v168                         | Listeria_monocytogenes_1639_v140 | 0.9496 |
| Listeria_monocytogenes_1639_v167                         | Listeria_monocytogenes_1639_v140 | 0.9417 |
| Listeria_monocytogenes_1639_v166                         | Listeria_monocytogenes_1639_v140 | 0.95   |
| Listeria_monocytogenes_1639_v165                         | Listeria_monocytogenes_1639_v140 | 0.9514 |
| Listeria_monocytogenes_1639_v164                         | Listeria_monocytogenes_1639_v140 | 0.9791 |
| Listeria_monocytogenes_1639_v163                         | Listeria_monocytogenes_1639_v140 | 0.9675 |
| Listeria_monocytogenes_1639_v162                         | Listeria_monocytogenes_1639_v140 | 0.9791 |
| Listeria_monocytogenes_1639_v161                         | Listeria_monocytogenes_1639_v140 | 0.9803 |
| Listeria_monocytogenes_1639_v160                         | Listeria_monocytogenes_1639_v140 | 0.9799 |
| Listeria_monocytogenes_1639_v15                          | Listeria_monocytogenes_1639_v140 | 0.9313 |
| Listeria_monocytogenes_1639_v159                         | Listeria_monocytogenes_1639_v140 | 0.978  |
| Listeria_monocytogenes_1639_v158                         | Listeria_monocytogenes_1639_v140 | 0.9799 |
| Listeria_monocytogenes_1639_v157                         | Listeria_monocytogenes_1639_v140 | 0.9795 |
| Listeria_monocytogenes_1639_v156                         | Listeria_monocytogenes_1639_v140 | 0.9321 |
| Listeria_monocytogenes_1639_v155                         | Listeria_monocytogenes_1639_v140 | 0.9462 |
| Listeria_monocytogenes_1639_v154                         | Listeria_monocytogenes_1639_v140 | 0.9485 |
| Listeria_monocytogenes_1639_v153                         | Listeria_monocytogenes_1639_v140 | 0.9469 |
| Listeria_monocytogenes_1639_v152                         | Listeria_monocytogenes_1639_v140 | 0.978  |
| Listeria_monocytogenes_1639_v151                         | Listeria_monocytogenes_1639_v140 | 0.978  |
| Listeria_monocytogenes_1639_v150                         | Listeria_monocytogenes_1639_v140 | 0.9454 |
| Listeria_monocytogenes_1639_v14                          | Listeria_monocytogenes_1639_v140 | 0.9379 |
| Listeria_monocytogenes_1639_v149                         | Listeria_monocytogenes_1639_v140 | 0.9443 |
| Listeria_monocytogenes_1639_v148                         | Listeria_monocytogenes_1639_v140 | 0.9769 |
| Listeria_monocytogenes_1639_v147                         | Listeria_monocytogenes_1639_v140 | 0.9624 |
| Listeria_monocytogenes_1639_v146                         | Listeria_monocytogenes_1639_v140 | 0.9566 |
| Listeria_monocytogenes_1639_v145                         | Listeria_monocytogenes_1639_v140 | 0.9505 |
| Listeria_monocytogenes_1639_v144                         | Listeria_monocytogenes_1639_v140 | 0.9988 |
| Listeria_monocytogenes_1639_v143                         | Listeria_monocytogenes_1639_v140 | 0.9535 |
| Listeria_monocytogenes_1639_v142                         | Listeria_monocytogenes_1639_v140 | 0.9992 |
| Listeria_monocytogenes_1639_v141                         | Listeria_monocytogenes_1639_v140 | 0.9721 |
| Listeria_monocytogenes_1639_v140                         | Listeria_monocytogenes_1639_v140 | 0.0662 |
| Listeria_welshimeri_1643                                 | Listeria_monocytogenes_1639_v141 | 0.8854 |
| Listeria_welshimeri_serovar_6b_str_SLCC5334_386043       | Listeria_monocytogenes_1639_v141 | 0.8847 |
| Listeria_seeligeri_serovar_1_2b_str_SLCC3954_683837      | Listeria_monocytogenes_1639_v141 | 0.8982 |
| Listeria_seeligeri_FSL_S4-171_702452                     | Listeria_monocytogenes_1639_v141 | 0.8335 |
| Listeria_seeligeri_FSL_N1-067_702453                     | Listeria_monocytogenes_1639_v141 | 0.8385 |
| Listeria_seeligeri_1640_v1                               | Listeria_monocytogenes_1639_v141 | 0.9015 |
| Listeria_seeligeri_1640                                  | Listeria_monocytogenes_1639_v141 | 0.8894 |
| Listeria_monocytogenes_WSLC1042_1457188                  | Listeria_monocytogenes_1639_v141 | 0.9639 |
| Listeria_monocytogenes_WSLC1001_1457187                  | Listeria_monocytogenes_1639_v141 | 0.945  |
| Listeria_monocytogenes_SLCC7179_879090                   | Listeria_monocytogenes_1639_v141 | 0.9514 |
| Listeria_monocytogenes_SLCC5850_882096                   | Listeria_monocytogenes_1639_v141 | 0.9489 |
| Listeria_monocytogenes_SLCC2755_932919                   | Listeria_monocytogenes_1639_v141 | 0.9596 |
| Listeria_monocytogenes_SLCC2540_879089                   | Listeria_monocytogenes_1639_v141 | 0.9644 |
| Listeria_monocytogenes_SLCC2479_882020                   | Listeria_monocytogenes_1639_v141 | 0.9431 |
| Listeria_monocytogenes_SLCC2378_879088                   | Listeria_monocytogenes_1639_v141 | 0.965  |
| Listeria_monocytogenes_SLCC2376_882097                   | Listeria_monocytogenes_1639_v141 | 0.9499 |
| Listeria_monocytogenes_SLCC2372_932920                   | Listeria_monocytogenes_1639_v141 | 0.9356 |
| Listeria_monocytogenes_serotype_4b_str_LL195_1230340     | Listeria_monocytogenes_1639_v141 | 0.971  |
| Listeria_monocytogenes_serotype_4b_str_LIS0087_1134669   | Listeria_monocytogenes_1639_v141 | 0.9264 |
| Listeria_monocytogenes_serotype_4b_str_F2365_265669      | Listeria_monocytogenes_1639_v141 | 0.971  |
| Listeria_monocytogenes_serotype_4b_str_CLIP_80459_568819 | Listeria_monocytogenes_1639_v141 | 0.9717 |
| Listeria_monocytogenes_serotype_4b_str_81-0861_1196161   | Listeria_monocytogenes_1639_v141 | 0.9544 |
| Listeria_monocytogenes_serotype_4b_str_81-0592_1196160   | Listeria_monocytogenes_1639_v141 | 0.9555 |
| Listeria_monocytogenes_serotype_4b_str_81-0558_1196159   | Listeria_monocytogenes_1639_v141 | 0.9566 |
| Listeria_monocytogenes_serotype_4b_str_10-0809_1196162   | Listeria_monocytogenes_1639_v141 | 0.9559 |
| Listeria_monocytogenes_serotype_4b_str_02-6680_1196175   | Listeria_monocytogenes_1639_v141 | 0.9695 |
| Listeria_monocytogenes_serotype_4b_str_02-6679_1196174   | Listeria_monocytogenes_1639_v141 | 0.9695 |
| Listeria_monocytogenes_serotype_4b_str_02-1792_1196173   | Listeria_monocytogenes_1639_v141 | 0.9566 |
| Listeria_monocytogenes_serotype_4b_str_02-1289_1196172   | Listeria_monocytogenes_1639_v141 | 0.9566 |
| Listeria_monocytogenes_serotype_4b_str_02-1103_1196171   | Listeria_monocytogenes_1639_v141 | 0.9566 |
| Listeria_monocytogenes_serotype_3c_str_10-5027_1196195   | Listeria_monocytogenes_1639_v141 | 0.9427 |
| Listeria_monocytogenes_serotype_1_2c_str_10-5026_1196194 | Listeria_monocytogenes_1639_v141 | 0.9438 |
| Listeria_monocytogenes_serotype_1_2c_str_10-5025_1196193 | Listeria_monocytogenes_1639_v141 | 0.9438 |
| Listeria_monocytogenes_serotype_1_2b_str_10-0811_1196164 | Listeria_monocytogenes_1639_v141 | 0.9543 |
| Listeria_monocytogenes_serotype_1_2b_str_10-0810_1196163 | Listeria_monocytogenes_1639_v141 | 0.9543 |
| Listeria_monocytogenes_serotype_1_2a_str_99-6370_1196179 | Listeria_monocytogenes_1639_v141 | 0.9307 |
| Listeria_monocytogenes_serotype_1_2a_str_98-2035_1196178 | Listeria_monocytogenes_1639_v141 | 0.9307 |
| Listeria_monocytogenes_serotype_1_2a_str_95-0093_1196177 | Listeria_monocytogenes_1639_v141 | 0.9363 |
| Listeria_monocytogenes_serotype_1_2a_str_88-0478_1196176 | Listeria_monocytogenes_1639_v141 | 0.9355 |
| Listeria_monocytogenes_serotype_1_2a_str_10-5024_1196192 | Listeria_monocytogenes_1639_v141 | 0.9367 |



|                                                          |                                  |        |
|----------------------------------------------------------|----------------------------------|--------|
| Listeria_monocytogenes_serotype_1_2a_str_10-4758_1196168 | Listeria_monocytogenes_1639_v141 | 0.9498 |
| Listeria_monocytogenes_serotype_1_2a_str_10-4754_1196167 | Listeria_monocytogenes_1639_v141 | 0.9494 |
| Listeria_monocytogenes_serotype_1_2a_str_10-1321_1196191 | Listeria_monocytogenes_1639_v141 | 0.9367 |
| Listeria_monocytogenes_serotype_1_2a_str_10-1047_1196190 | Listeria_monocytogenes_1639_v141 | 0.937  |
| Listeria_monocytogenes_serotype_1_2a_str_10-1046_1196189 | Listeria_monocytogenes_1639_v141 | 0.937  |
| Listeria_monocytogenes_serotype_1_2a_str_10-0934_1196170 | Listeria_monocytogenes_1639_v141 | 0.9592 |
| Listeria_monocytogenes_serotype_1_2a_str_10-0933_1196169 | Listeria_monocytogenes_1639_v141 | 0.9592 |
| Listeria_monocytogenes_serotype_1_2a_str_10-0815_1196188 | Listeria_monocytogenes_1639_v141 | 0.9321 |
| Listeria_monocytogenes_serotype_1_2a_str_10-0814_1196187 | Listeria_monocytogenes_1639_v141 | 0.9367 |
| Listeria_monocytogenes_serotype_1_2a_str_10-0813_1196166 | Listeria_monocytogenes_1639_v141 | 0.9429 |
| Listeria_monocytogenes_serotype_1_2a_str_10-0812_1196165 | Listeria_monocytogenes_1639_v141 | 0.9429 |
| Listeria_monocytogenes_serotype_1_2a_str_08-7669_1196186 | Listeria_monocytogenes_1639_v141 | 0.9455 |
| Listeria_monocytogenes_serotype_1_2a_str_08-7374_1196185 | Listeria_monocytogenes_1639_v141 | 0.9367 |
| Listeria_monocytogenes_serotype_1_2a_str_08-6997_1196184 | Listeria_monocytogenes_1639_v141 | 0.9321 |
| Listeria_monocytogenes_serotype_1_2a_str_08-6569_1196183 | Listeria_monocytogenes_1639_v141 | 0.9321 |
| Listeria_monocytogenes_serotype_1_2a_str_08-6056_1196182 | Listeria_monocytogenes_1639_v141 | 0.9321 |
| Listeria_monocytogenes_serotype_1_2a_str_04-5457_1196181 | Listeria_monocytogenes_1639_v141 | 0.9367 |
| Listeria_monocytogenes_serotype_1_2a_str_02-5993_1196180 | Listeria_monocytogenes_1639_v141 | 0.9363 |
| Listeria_monocytogenes_R479a_1437838                     | Listeria_monocytogenes_1639_v141 | 0.9352 |
| Listeria_monocytogenes_N53-1_1234142                     | Listeria_monocytogenes_1639_v141 | 0.9034 |
| Listeria_monocytogenes_M7_1030009                        | Listeria_monocytogenes_1639_v141 | 0.9104 |
| Listeria_monocytogenes_LO28_393132                       | Listeria_monocytogenes_1639_v141 | 0.942  |
| Listeria_monocytogenes_L99_563174                        | Listeria_monocytogenes_1639_v141 | 0.9111 |
| Listeria_monocytogenes_L312_882094                       | Listeria_monocytogenes_1639_v141 | 0.9721 |
| Listeria_monocytogenes_J1816_930781                      | Listeria_monocytogenes_1639_v141 | 0.9519 |
| Listeria_monocytogenes_J1-220_930782                     | Listeria_monocytogenes_1639_v141 | 0.9461 |
| Listeria_monocytogenes_J0161_393130                      | Listeria_monocytogenes_1639_v141 | 0.9393 |
| Listeria_monocytogenes_HCC23_552536                      | Listeria_monocytogenes_1639_v141 | 0.9104 |
| Listeria_monocytogenes_FSL_R2-561_393126                 | Listeria_monocytogenes_1639_v141 | 0.9412 |
| Listeria_monocytogenes_FSL_J1-208_393119                 | Listeria_monocytogenes_1639_v141 | 0.9189 |
| Listeria_monocytogenes_FSL_J1-175_393118                 | Listeria_monocytogenes_1639_v141 | 0.9662 |
| Listeria_monocytogenes_Finland_1998_393127               | Listeria_monocytogenes_1639_v141 | 0.9604 |
| Listeria_monocytogenes_EGD-e_169963_v1                   | Listeria_monocytogenes_1639_v141 | 0.9502 |
| Listeria_monocytogenes_EGD-e_169963                      | Listeria_monocytogenes_1639_v141 | 0.9506 |
| Listeria_monocytogenes_EGD_1334565                       | Listeria_monocytogenes_1639_v141 | 0.9497 |
| Listeria_monocytogenes_CFSAN002349_1299895               | Listeria_monocytogenes_1639_v141 | 0.9722 |
| Listeria_monocytogenes_ATCC_19117_882095_v1              | Listeria_monocytogenes_1639_v141 | 0.9649 |
| Listeria_monocytogenes_ATCC_19117_882095                 | Listeria_monocytogenes_1639_v141 | 0.9649 |
| Listeria_monocytogenes_6179_1288295                      | Listeria_monocytogenes_1639_v141 | 0.9238 |
| Listeria_monocytogenes_1639_v9                           | Listeria_monocytogenes_1639_v141 | 0.9382 |
| Listeria_monocytogenes_1639_v99                          | Listeria_monocytogenes_1639_v141 | 0.9527 |
| Listeria_monocytogenes_1639_v98                          | Listeria_monocytogenes_1639_v141 | 0.9378 |
| Listeria_monocytogenes_1639_v97                          | Listeria_monocytogenes_1639_v141 | 0.9603 |
| Listeria_monocytogenes_1639_v96                          | Listeria_monocytogenes_1639_v141 | 0.9523 |
| Listeria_monocytogenes_1639_v95                          | Listeria_monocytogenes_1639_v141 | 0.9523 |
| Listeria_monocytogenes_1639_v94                          | Listeria_monocytogenes_1639_v141 | 0.9527 |
| Listeria_monocytogenes_1639_v93                          | Listeria_monocytogenes_1639_v141 | 0.9366 |
| Listeria_monocytogenes_1639_v92                          | Listeria_monocytogenes_1639_v141 | 0.9531 |
| Listeria_monocytogenes_1639_v91                          | Listeria_monocytogenes_1639_v141 | 0.9537 |
| Listeria_monocytogenes_1639_v90                          | Listeria_monocytogenes_1639_v141 | 0.9378 |
| Listeria_monocytogenes_1639_v8                           | Listeria_monocytogenes_1639_v141 | 0.9248 |
| Listeria_monocytogenes_1639_v89                          | Listeria_monocytogenes_1639_v141 | 0.9647 |
| Listeria_monocytogenes_1639_v88                          | Listeria_monocytogenes_1639_v141 | 0.9425 |
| Listeria_monocytogenes_1639_v87                          | Listeria_monocytogenes_1639_v141 | 0.939  |
| Listeria_monocytogenes_1639_v86                          | Listeria_monocytogenes_1639_v141 | 0.9382 |
| Listeria_monocytogenes_1639_v85                          | Listeria_monocytogenes_1639_v141 | 0.9541 |
| Listeria_monocytogenes_1639_v84                          | Listeria_monocytogenes_1639_v141 | 0.9451 |
| Listeria_monocytogenes_1639_v83                          | Listeria_monocytogenes_1639_v141 | 0.9554 |
| Listeria_monocytogenes_1639_v82                          | Listeria_monocytogenes_1639_v141 | 0.9551 |
| Listeria_monocytogenes_1639_v81                          | Listeria_monocytogenes_1639_v141 | 0.9425 |
| Listeria_monocytogenes_1639_v80                          | Listeria_monocytogenes_1639_v141 | 0.9588 |
| Listeria_monocytogenes_1639_v7                           | Listeria_monocytogenes_1639_v141 | 0.9248 |
| Listeria_monocytogenes_1639_v79                          | Listeria_monocytogenes_1639_v141 | 0.9408 |
| Listeria_monocytogenes_1639_v78                          | Listeria_monocytogenes_1639_v141 | 0.9418 |
| Listeria_monocytogenes_1639_v77                          | Listeria_monocytogenes_1639_v141 | 0.9431 |
| Listeria_monocytogenes_1639_v76                          | Listeria_monocytogenes_1639_v141 | 0.9339 |
| Listeria_monocytogenes_1639_v75                          | Listeria_monocytogenes_1639_v141 | 0.9111 |
| Listeria_monocytogenes_1639_v74                          | Listeria_monocytogenes_1639_v141 | 0.9363 |
| Listeria_monocytogenes_1639_v73                          | Listeria_monocytogenes_1639_v141 | 0.9378 |
| Listeria_monocytogenes_1639_v72                          | Listeria_monocytogenes_1639_v141 | 0.9535 |
| Listeria_monocytogenes_1639_v71                          | Listeria_monocytogenes_1639_v141 | 0.924  |
| Listeria_monocytogenes_1639_v70                          | Listeria_monocytogenes_1639_v141 | 0.9395 |
| Listeria_monocytogenes_1639_v6                           | Listeria_monocytogenes_1639_v141 | 0.9241 |
| Listeria_monocytogenes_1639_v69                          | Listeria_monocytogenes_1639_v141 | 0.9559 |
| Listeria_monocytogenes_1639_v68                          | Listeria_monocytogenes_1639_v141 | 0.9452 |
| Listeria_monocytogenes_1639_v67                          | Listeria_monocytogenes_1639_v141 | 0.9581 |
| Listeria_monocytogenes_1639_v66                          | Listeria_monocytogenes_1639_v141 | 0.9456 |
| Listeria_monocytogenes_1639_v65                          | Listeria_monocytogenes_1639_v141 | 0.9399 |
| Listeria_monocytogenes_1639_v64                          | Listeria_monocytogenes_1639_v141 | 0.9365 |
| Listeria_monocytogenes_1639_v63                          | Listeria_monocytogenes_1639_v141 | 0.9542 |
| Listeria_monocytogenes_1639_v62                          | Listeria_monocytogenes_1639_v141 | 0.9397 |
| Listeria_monocytogenes_1639_v61                          | Listeria_monocytogenes_1639_v141 | 0.9398 |
| Listeria_monocytogenes_1639_v60                          | Listeria_monocytogenes_1639_v141 | 0.9402 |
| Listeria_monocytogenes_1639_v5                           | Listeria_monocytogenes_1639_v141 | 0.9182 |
| Listeria_monocytogenes_1639_v59                          | Listeria_monocytogenes_1639_v141 | 0.955  |
| Listeria_monocytogenes_1639_v58                          | Listeria_monocytogenes_1639_v141 | 0.9604 |
| Listeria_monocytogenes_1639_v57                          | Listeria_monocytogenes_1639_v141 | 0.9484 |
| Listeria_monocytogenes_1639_v56                          | Listeria_monocytogenes_1639_v141 | 0.955  |
| Listeria_monocytogenes_1639_v55                          | Listeria_monocytogenes_1639_v141 | 0.9452 |
| Listeria_monocytogenes_1639_v54                          | Listeria_monocytogenes_1639_v141 | 0.9287 |
| Listeria_monocytogenes_1639_v53                          | Listeria_monocytogenes_1639_v141 | 0.9402 |

[illegible]

|                                                          |                                  |        |
|----------------------------------------------------------|----------------------------------|--------|
| Listeria_monocytogenes_1639_v14                          | Listeria_monocytogenes_1639_v141 | 0.9449 |
| Listeria_monocytogenes_1639_v149                         | Listeria_monocytogenes_1639_v141 | 0.9497 |
| Listeria_monocytogenes_1639_v148                         | Listeria_monocytogenes_1639_v141 | 0.9695 |
| Listeria_monocytogenes_1639_v147                         | Listeria_monocytogenes_1639_v141 | 0.9548 |
| Listeria_monocytogenes_1639_v146                         | Listeria_monocytogenes_1639_v141 | 0.9616 |
| Listeria_monocytogenes_1639_v145                         | Listeria_monocytogenes_1639_v141 | 0.9512 |
| Listeria_monocytogenes_1639_v144                         | Listeria_monocytogenes_1639_v141 | 0.9714 |
| Listeria_monocytogenes_1639_v143                         | Listeria_monocytogenes_1639_v141 | 0.9581 |
| Listeria_monocytogenes_1639_v142                         | Listeria_monocytogenes_1639_v141 | 0.9717 |
| Listeria_monocytogenes_1639_v141                         | Listeria_monocytogenes_1639_v141 | 0.0659 |
| Listeria_welshimeri_1643                                 | Listeria_monocytogenes_1639_v142 | 0.8863 |
| Listeria_welshimeri_serovar_6b_str_SLCC5334_386043       | Listeria_monocytogenes_1639_v142 | 0.8856 |
| Listeria_seeligeri_serovar_1_2b_str_SLCC3954_683837      | Listeria_monocytogenes_1639_v142 | 0.8905 |
| Listeria_seeligeri_FSL_S4-171_702452                     | Listeria_monocytogenes_1639_v142 | 0.833  |
| Listeria_seeligeri_FSL_N1-067_702453                     | Listeria_monocytogenes_1639_v142 | 0.8311 |
| Listeria_seeligeri_1640_v1                               | Listeria_monocytogenes_1639_v142 | 0.8966 |
| Listeria_seeligeri_1640                                  | Listeria_monocytogenes_1639_v142 | 0.8888 |
| Listeria_monocytogenes_WSLC1042_1457188                  | Listeria_monocytogenes_1639_v142 | 0.9716 |
| Listeria_monocytogenes_WSLC1001_1457187                  | Listeria_monocytogenes_1639_v142 | 0.9382 |
| Listeria_monocytogenes_SLCC7179_879090                   | Listeria_monocytogenes_1639_v142 | 0.943  |
| Listeria_monocytogenes_SLCC5850_882096                   | Listeria_monocytogenes_1639_v142 | 0.9429 |
| Listeria_monocytogenes_SLCC2755_932919                   | Listeria_monocytogenes_1639_v142 | 0.9532 |
| Listeria_monocytogenes_SLCC2540_879089                   | Listeria_monocytogenes_1639_v142 | 0.9534 |
| Listeria_monocytogenes_SLCC2479_882020                   | Listeria_monocytogenes_1639_v142 | 0.9333 |
| Listeria_monocytogenes_SLCC2378_879088                   | Listeria_monocytogenes_1639_v142 | 0.9728 |
| Listeria_monocytogenes_SLCC2376_882097                   | Listeria_monocytogenes_1639_v142 | 0.9504 |
| Listeria_monocytogenes_SLCC2372_932920                   | Listeria_monocytogenes_1639_v142 | 0.9259 |
| Listeria_monocytogenes_serotype_4b_str_LL195_1230340     | Listeria_monocytogenes_1639_v142 | 0.9791 |
| Listeria_monocytogenes_serotype_4b_str_LIS0087_1134669   | Listeria_monocytogenes_1639_v142 | 0.9184 |
| Listeria_monocytogenes_serotype_4b_str_F2365_265669      | Listeria_monocytogenes_1639_v142 | 0.9791 |
| Listeria_monocytogenes_serotype_4b_str_CLIP_80459_568819 | Listeria_monocytogenes_1639_v142 | 0.9988 |
| Listeria_monocytogenes_serotype_4b_str_81-0861_1196161   | Listeria_monocytogenes_1639_v142 | 0.9609 |
| Listeria_monocytogenes_serotype_4b_str_81-0592_1196160   | Listeria_monocytogenes_1639_v142 | 0.962  |
| Listeria_monocytogenes_serotype_4b_str_81-0558_1196159   | Listeria_monocytogenes_1639_v142 | 0.9631 |
| Listeria_monocytogenes_serotype_4b_str_10-0809_1196162   | Listeria_monocytogenes_1639_v142 | 0.9624 |
| Listeria_monocytogenes_serotype_4b_str_02-6680_1196175   | Listeria_monocytogenes_1639_v142 | 0.9815 |
| Listeria_monocytogenes_serotype_4b_str_02-6679_1196174   | Listeria_monocytogenes_1639_v142 | 0.9815 |
| Listeria_monocytogenes_serotype_4b_str_02-1792_1196173   | Listeria_monocytogenes_1639_v142 | 0.9628 |
| Listeria_monocytogenes_serotype_4b_str_02-1289_1196172   | Listeria_monocytogenes_1639_v142 | 0.9628 |
| Listeria_monocytogenes_serotype_4b_str_02-1103_1196171   | Listeria_monocytogenes_1639_v142 | 0.9628 |
| Listeria_monocytogenes_serotype_3c_str_10-5027_1196195   | Listeria_monocytogenes_1639_v142 | 0.9325 |
| Listeria_monocytogenes_serotype_1_2c_str_10-5026_1196194 | Listeria_monocytogenes_1639_v142 | 0.9337 |
| Listeria_monocytogenes_serotype_1_2c_str_10-5025_1196193 | Listeria_monocytogenes_1639_v142 | 0.9337 |
| Listeria_monocytogenes_serotype_1_2b_str_10-0811_1196164 | Listeria_monocytogenes_1639_v142 | 0.946  |
| Listeria_monocytogenes_serotype_1_2b_str_10-0810_1196163 | Listeria_monocytogenes_1639_v142 | 0.946  |
| Listeria_monocytogenes_serotype_1_2a_str_99-6370_1196179 | Listeria_monocytogenes_1639_v142 | 0.9233 |
| Listeria_monocytogenes_serotype_1_2a_str_98-2035_1196178 | Listeria_monocytogenes_1639_v142 | 0.9233 |
| Listeria_monocytogenes_serotype_1_2a_str_95-0093_1196177 | Listeria_monocytogenes_1639_v142 | 0.9289 |
| Listeria_monocytogenes_serotype_1_2a_str_88-0478_1196176 | Listeria_monocytogenes_1639_v142 | 0.9281 |
| Listeria_monocytogenes_serotype_1_2a_str_10-5024_1196192 | Listeria_monocytogenes_1639_v142 | 0.9292 |
| Listeria_monocytogenes_serotype_1_2a_str_10-4758_1196168 | Listeria_monocytogenes_1639_v142 | 0.9437 |
| Listeria_monocytogenes_serotype_1_2a_str_10-4754_1196167 | Listeria_monocytogenes_1639_v142 | 0.9433 |
| Listeria_monocytogenes_serotype_1_2a_str_10-1321_1196191 | Listeria_monocytogenes_1639_v142 | 0.9292 |
| Listeria_monocytogenes_serotype_1_2a_str_10-1047_1196190 | Listeria_monocytogenes_1639_v142 | 0.9296 |
| Listeria_monocytogenes_serotype_1_2a_str_10-1046_1196189 | Listeria_monocytogenes_1639_v142 | 0.9296 |
| Listeria_monocytogenes_serotype_1_2a_str_10-0934_1196170 | Listeria_monocytogenes_1639_v142 | 0.9531 |
| Listeria_monocytogenes_serotype_1_2a_str_10-0933_1196169 | Listeria_monocytogenes_1639_v142 | 0.9531 |
| Listeria_monocytogenes_serotype_1_2a_str_10-0815_1196188 | Listeria_monocytogenes_1639_v142 | 0.9247 |
| Listeria_monocytogenes_serotype_1_2a_str_10-0814_1196187 | Listeria_monocytogenes_1639_v142 | 0.9292 |
| Listeria_monocytogenes_serotype_1_2a_str_10-0813_1196166 | Listeria_monocytogenes_1639_v142 | 0.9353 |
| Listeria_monocytogenes_serotype_1_2a_str_10-0812_1196165 | Listeria_monocytogenes_1639_v142 | 0.9353 |
| Listeria_monocytogenes_serotype_1_2a_str_08-7669_1196186 | Listeria_monocytogenes_1639_v142 | 0.9384 |
| Listeria_monocytogenes_serotype_1_2a_str_08-7374_1196185 | Listeria_monocytogenes_1639_v142 | 0.9292 |
| Listeria_monocytogenes_serotype_1_2a_str_08-6997_1196184 | Listeria_monocytogenes_1639_v142 | 0.9247 |
| Listeria_monocytogenes_serotype_1_2a_str_08-6569_1196183 | Listeria_monocytogenes_1639_v142 | 0.9247 |
| Listeria_monocytogenes_serotype_1_2a_str_08-6056_1196182 | Listeria_monocytogenes_1639_v142 | 0.9247 |
| Listeria_monocytogenes_serotype_1_2a_str_04-5457_1196181 | Listeria_monocytogenes_1639_v142 | 0.9292 |
| Listeria_monocytogenes_serotype_1_2a_str_02-5993_1196180 | Listeria_monocytogenes_1639_v142 | 0.9289 |
| Listeria_monocytogenes_R479a_1437838                     | Listeria_monocytogenes_1639_v142 | 0.9282 |
| Listeria_monocytogenes_N53-1_1234142                     | Listeria_monocytogenes_1639_v142 | 0.898  |
| Listeria_monocytogenes_M7_1030009                        | Listeria_monocytogenes_1639_v142 | 0.9151 |
| Listeria_monocytogenes_LO28_393132                       | Listeria_monocytogenes_1639_v142 | 0.9319 |
| Listeria_monocytogenes_L99_563174                        | Listeria_monocytogenes_1639_v142 | 0.9158 |
| Listeria_monocytogenes_L312_882094                       | Listeria_monocytogenes_1639_v142 | 0.9992 |
| Listeria_monocytogenes_J1816_930781                      | Listeria_monocytogenes_1639_v142 | 0.9569 |
| Listeria_monocytogenes_J1-220_930782                     | Listeria_monocytogenes_1639_v142 | 0.9525 |
| Listeria_monocytogenes_J0161_393130                      | Listeria_monocytogenes_1639_v142 | 0.9357 |
| Listeria_monocytogenes_HCC23_552536                      | Listeria_monocytogenes_1639_v142 | 0.915  |
| Listeria_monocytogenes_FSL_R2-561_393126                 | Listeria_monocytogenes_1639_v142 | 0.9319 |
| Listeria_monocytogenes_FSL_J1-208_393119                 | Listeria_monocytogenes_1639_v142 | 0.9225 |
| Listeria_monocytogenes_FSL_J1-175_393118                 | Listeria_monocytogenes_1639_v142 | 0.9567 |
| Listeria_monocytogenes_Finland_1998_393127               | Listeria_monocytogenes_1639_v142 | 0.9538 |
| Listeria_monocytogenes_EGD-e_169963_v1                   | Listeria_monocytogenes_1639_v142 | 0.9411 |
| Listeria_monocytogenes_EGD-e_169963                      | Listeria_monocytogenes_1639_v142 | 0.9415 |
| Listeria_monocytogenes_EGD_1334565                       | Listeria_monocytogenes_1639_v142 | 0.9436 |
| Listeria_monocytogenes_CFSAN002349_1299895               | Listeria_monocytogenes_1639_v142 | 0.9803 |
| Listeria_monocytogenes_ATCC_19117_882095_v1              | Listeria_monocytogenes_1639_v142 | 0.9727 |
| Listeria_monocytogenes_ATCC_19117_882095                 | Listeria_monocytogenes_1639_v142 | 0.9727 |
| Listeria_monocytogenes_6179_1288295                      | Listeria_monocytogenes_1639_v142 | 0.9153 |
| Listeria_monocytogenes_1639_v9                           | Listeria_monocytogenes_1639_v142 | 0.9275 |
| Listeria_monocytogenes_1639_v99                          | Listeria_monocytogenes_1639_v142 | 0.958  |

[illegible]

|                                                          |                                  |        |
|----------------------------------------------------------|----------------------------------|--------|
| Listeria_monocytogenes_1639_v195                         | Listeria_monocytogenes_1639_v142 | 0.9507 |
| Listeria_monocytogenes_1639_v194                         | Listeria_monocytogenes_1639_v142 | 0.9512 |
| Listeria_monocytogenes_1639_v193                         | Listeria_monocytogenes_1639_v142 | 0.9512 |
| Listeria_monocytogenes_1639_v192                         | Listeria_monocytogenes_1639_v142 | 0.915  |
| Listeria_monocytogenes_1639_v191                         | Listeria_monocytogenes_1639_v142 | 0.9568 |
| Listeria_monocytogenes_1639_v190                         | Listeria_monocytogenes_1639_v142 | 0.9549 |
| Listeria_monocytogenes_1639_v18                          | Listeria_monocytogenes_1639_v142 | 0.9477 |
| Listeria_monocytogenes_1639_v189                         | Listeria_monocytogenes_1639_v142 | 0.9542 |
| Listeria_monocytogenes_1639_v188                         | Listeria_monocytogenes_1639_v142 | 0.9579 |
| Listeria_monocytogenes_1639_v187                         | Listeria_monocytogenes_1639_v142 | 0.9545 |
| Listeria_monocytogenes_1639_v186                         | Listeria_monocytogenes_1639_v142 | 0.9553 |
| Listeria_monocytogenes_1639_v185                         | Listeria_monocytogenes_1639_v142 | 0.9549 |
| Listeria_monocytogenes_1639_v184                         | Listeria_monocytogenes_1639_v142 | 0.9541 |
| Listeria_monocytogenes_1639_v183                         | Listeria_monocytogenes_1639_v142 | 0.9526 |
| Listeria_monocytogenes_1639_v182                         | Listeria_monocytogenes_1639_v142 | 0.9544 |
| Listeria_monocytogenes_1639_v181                         | Listeria_monocytogenes_1639_v142 | 0.9404 |
| Listeria_monocytogenes_1639_v180                         | Listeria_monocytogenes_1639_v142 | 0.9404 |
| Listeria_monocytogenes_1639_v17                          | Listeria_monocytogenes_1639_v142 | 0.9477 |
| Listeria_monocytogenes_1639_v179                         | Listeria_monocytogenes_1639_v142 | 0.9396 |
| Listeria_monocytogenes_1639_v178                         | Listeria_monocytogenes_1639_v142 | 0.9534 |
| Listeria_monocytogenes_1639_v177                         | Listeria_monocytogenes_1639_v142 | 0.9773 |
| Listeria_monocytogenes_1639_v176                         | Listeria_monocytogenes_1639_v142 | 0.9481 |
| Listeria_monocytogenes_1639_v175                         | Listeria_monocytogenes_1639_v142 | 0.9434 |
| Listeria_monocytogenes_1639_v174                         | Listeria_monocytogenes_1639_v142 | 0.9554 |
| Listeria_monocytogenes_1639_v173                         | Listeria_monocytogenes_1639_v142 | 0.9709 |
| Listeria_monocytogenes_1639_v172                         | Listeria_monocytogenes_1639_v142 | 0.9456 |
| Listeria_monocytogenes_1639_v171                         | Listeria_monocytogenes_1639_v142 | 0.94   |
| Listeria_monocytogenes_1639_v170                         | Listeria_monocytogenes_1639_v142 | 0.9483 |
| Listeria_monocytogenes_1639_v16                          | Listeria_monocytogenes_1639_v142 | 0.9155 |
| Listeria_monocytogenes_1639_v169                         | Listeria_monocytogenes_1639_v142 | 0.9507 |
| Listeria_monocytogenes_1639_v168                         | Listeria_monocytogenes_1639_v142 | 0.9492 |
| Listeria_monocytogenes_1639_v167                         | Listeria_monocytogenes_1639_v142 | 0.9413 |
| Listeria_monocytogenes_1639_v166                         | Listeria_monocytogenes_1639_v142 | 0.9496 |
| Listeria_monocytogenes_1639_v165                         | Listeria_monocytogenes_1639_v142 | 0.9507 |
| Listeria_monocytogenes_1639_v164                         | Listeria_monocytogenes_1639_v142 | 0.9783 |
| Listeria_monocytogenes_1639_v163                         | Listeria_monocytogenes_1639_v142 | 0.9676 |
| Listeria_monocytogenes_1639_v162                         | Listeria_monocytogenes_1639_v142 | 0.9783 |
| Listeria_monocytogenes_1639_v161                         | Listeria_monocytogenes_1639_v142 | 0.9795 |
| Listeria_monocytogenes_1639_v160                         | Listeria_monocytogenes_1639_v142 | 0.9799 |
| Listeria_monocytogenes_1639_v15                          | Listeria_monocytogenes_1639_v142 | 0.9306 |
| Listeria_monocytogenes_1639_v159                         | Listeria_monocytogenes_1639_v142 | 0.9773 |
| Listeria_monocytogenes_1639_v158                         | Listeria_monocytogenes_1639_v142 | 0.9795 |
| Listeria_monocytogenes_1639_v157                         | Listeria_monocytogenes_1639_v142 | 0.9791 |
| Listeria_monocytogenes_1639_v156                         | Listeria_monocytogenes_1639_v142 | 0.9314 |
| Listeria_monocytogenes_1639_v155                         | Listeria_monocytogenes_1639_v142 | 0.9458 |
| Listeria_monocytogenes_1639_v154                         | Listeria_monocytogenes_1639_v142 | 0.9481 |
| Listeria_monocytogenes_1639_v153                         | Listeria_monocytogenes_1639_v142 | 0.9465 |
| Listeria_monocytogenes_1639_v152                         | Listeria_monocytogenes_1639_v142 | 0.9776 |
| Listeria_monocytogenes_1639_v151                         | Listeria_monocytogenes_1639_v142 | 0.9776 |
| Listeria_monocytogenes_1639_v150                         | Listeria_monocytogenes_1639_v142 | 0.9446 |
| Listeria_monocytogenes_1639_v14                          | Listeria_monocytogenes_1639_v142 | 0.9375 |
| Listeria_monocytogenes_1639_v149                         | Listeria_monocytogenes_1639_v142 | 0.9436 |
| Listeria_monocytogenes_1639_v148                         | Listeria_monocytogenes_1639_v142 | 0.9761 |
| Listeria_monocytogenes_1639_v147                         | Listeria_monocytogenes_1639_v142 | 0.9617 |
| Listeria_monocytogenes_1639_v146                         | Listeria_monocytogenes_1639_v142 | 0.9562 |
| Listeria_monocytogenes_1639_v145                         | Listeria_monocytogenes_1639_v142 | 0.9502 |
| Listeria_monocytogenes_1639_v144                         | Listeria_monocytogenes_1639_v142 | 0.9988 |
| Listeria_monocytogenes_1639_v143                         | Listeria_monocytogenes_1639_v142 | 0.9532 |
| Listeria_monocytogenes_1639_v142                         | Listeria_monocytogenes_1639_v142 | 0.0653 |
| Listeria_welshimeri_1643                                 | Listeria_monocytogenes_1639_v143 | 0.878  |
| Listeria_welshimeri_serovar_6b_str_SLCC5334_386043       | Listeria_monocytogenes_1639_v143 | 0.8774 |
| Listeria_seeligeri_serovar_1_2b_str_SLCC3954_683837      | Listeria_monocytogenes_1639_v143 | 0.8908 |
| Listeria_seeligeri_FSL_S4-171_702452                     | Listeria_monocytogenes_1639_v143 | 0.8213 |
| Listeria_seeligeri_FSL_N1-067_702453                     | Listeria_monocytogenes_1639_v143 | 0.8363 |
| Listeria_seeligeri_1640_v1                               | Listeria_monocytogenes_1639_v143 | 0.8946 |
| Listeria_seeligeri_1640                                  | Listeria_monocytogenes_1639_v143 | 0.8837 |
| Listeria_monocytogenes_WSLC1042_1457188                  | Listeria_monocytogenes_1639_v143 | 0.9471 |
| Listeria_monocytogenes_WSLC1001_1457187                  | Listeria_monocytogenes_1639_v143 | 0.9564 |
| Listeria_monocytogenes_SLCC7179_879090                   | Listeria_monocytogenes_1639_v143 | 0.9672 |
| Listeria_monocytogenes_SLCC5850_882096                   | Listeria_monocytogenes_1639_v143 | 0.9608 |
| Listeria_monocytogenes_SLCC2755_932919                   | Listeria_monocytogenes_1639_v143 | 0.9448 |
| Listeria_monocytogenes_SLCC2540_879089                   | Listeria_monocytogenes_1639_v143 | 0.9472 |
| Listeria_monocytogenes_SLCC2479_882020                   | Listeria_monocytogenes_1639_v143 | 0.9545 |
| Listeria_monocytogenes_SLCC2378_879088                   | Listeria_monocytogenes_1639_v143 | 0.9485 |
| Listeria_monocytogenes_SLCC2376_882097                   | Listeria_monocytogenes_1639_v143 | 0.948  |
| Listeria_monocytogenes_SLCC2372_932920                   | Listeria_monocytogenes_1639_v143 | 0.9477 |
| Listeria_monocytogenes_serotype_4b_str_LL195_1230340     | Listeria_monocytogenes_1639_v143 | 0.9544 |
| Listeria_monocytogenes_serotype_4b_str_LIS0087_1134669   | Listeria_monocytogenes_1639_v143 | 0.9373 |
| Listeria_monocytogenes_serotype_4b_str_F2365_265669      | Listeria_monocytogenes_1639_v143 | 0.9544 |
| Listeria_monocytogenes_serotype_4b_str_CLIP_80459_568819 | Listeria_monocytogenes_1639_v143 | 0.9535 |
| Listeria_monocytogenes_serotype_4b_str_81-0861_1196161   | Listeria_monocytogenes_1639_v143 | 0.9373 |
| Listeria_monocytogenes_serotype_4b_str_81-0592_1196160   | Listeria_monocytogenes_1639_v143 | 0.9384 |
| Listeria_monocytogenes_serotype_4b_str_81-0558_1196159   | Listeria_monocytogenes_1639_v143 | 0.9384 |
| Listeria_monocytogenes_serotype_4b_str_10-0809_1196162   | Listeria_monocytogenes_1639_v143 | 0.9384 |
| Listeria_monocytogenes_serotype_4b_str_02-6680_1196175   | Listeria_monocytogenes_1639_v143 | 0.9494 |
| Listeria_monocytogenes_serotype_4b_str_02-6679_1196174   | Listeria_monocytogenes_1639_v143 | 0.9494 |
| Listeria_monocytogenes_serotype_4b_str_02-1792_1196173   | Listeria_monocytogenes_1639_v143 | 0.9388 |
| Listeria_monocytogenes_serotype_4b_str_02-1289_1196172   | Listeria_monocytogenes_1639_v143 | 0.9388 |
| Listeria_monocytogenes_serotype_4b_str_02-1103_1196171   | Listeria_monocytogenes_1639_v143 | 0.9388 |
| Listeria_monocytogenes_serotype_3c_str_10-5027_1196195   | Listeria_monocytogenes_1639_v143 | 0.9537 |
| Listeria_monocytogenes_serotype_1_2c_str_10-5026_1196194 | Listeria_monocytogenes_1639_v143 | 0.9544 |

|                                                          |                                  |        |
|----------------------------------------------------------|----------------------------------|--------|
| Listeria_monocytogenes_serotype_1_2c_str_10-5025_1196193 | Listeria_monocytogenes_1639_v143 | 0.9548 |
| Listeria_monocytogenes_serotype_1_2b_str_10-0811_1196164 | Listeria_monocytogenes_1639_v143 | 0.9373 |
| Listeria_monocytogenes_serotype_1_2b_str_10-0810_1196163 | Listeria_monocytogenes_1639_v143 | 0.9373 |
| Listeria_monocytogenes_serotype_1_2a_str_99-6370_1196179 | Listeria_monocytogenes_1639_v143 | 0.9371 |
| Listeria_monocytogenes_serotype_1_2a_str_98-2035_1196178 | Listeria_monocytogenes_1639_v143 | 0.9371 |
| Listeria_monocytogenes_serotype_1_2a_str_95-0093_1196177 | Listeria_monocytogenes_1639_v143 | 0.9431 |
| Listeria_monocytogenes_serotype_1_2a_str_88-0478_1196176 | Listeria_monocytogenes_1639_v143 | 0.9423 |
| Listeria_monocytogenes_serotype_1_2a_str_10-5024_1196192 | Listeria_monocytogenes_1639_v143 | 0.9435 |
| Listeria_monocytogenes_serotype_1_2a_str_10-4758_1196168 | Listeria_monocytogenes_1639_v143 | 0.969  |
| Listeria_monocytogenes_serotype_1_2a_str_10-4754_1196167 | Listeria_monocytogenes_1639_v143 | 0.969  |
| Listeria_monocytogenes_serotype_1_2a_str_10-1321_1196191 | Listeria_monocytogenes_1639_v143 | 0.9435 |
| Listeria_monocytogenes_serotype_1_2a_str_10-1047_1196190 | Listeria_monocytogenes_1639_v143 | 0.9438 |
| Listeria_monocytogenes_serotype_1_2a_str_10-1046_1196189 | Listeria_monocytogenes_1639_v143 | 0.9438 |
| Listeria_monocytogenes_serotype_1_2a_str_10-0934_1196170 | Listeria_monocytogenes_1639_v143 | 0.9748 |
| Listeria_monocytogenes_serotype_1_2a_str_10-0933_1196169 | Listeria_monocytogenes_1639_v143 | 0.9748 |
| Listeria_monocytogenes_serotype_1_2a_str_10-0815_1196188 | Listeria_monocytogenes_1639_v143 | 0.9385 |
| Listeria_monocytogenes_serotype_1_2a_str_10-0814_1196187 | Listeria_monocytogenes_1639_v143 | 0.9431 |
| Listeria_monocytogenes_serotype_1_2a_str_10-0813_1196166 | Listeria_monocytogenes_1639_v143 | 0.9535 |
| Listeria_monocytogenes_serotype_1_2a_str_10-0812_1196165 | Listeria_monocytogenes_1639_v143 | 0.9535 |
| Listeria_monocytogenes_serotype_1_2a_str_08-7669_1196186 | Listeria_monocytogenes_1639_v143 | 0.9532 |
| Listeria_monocytogenes_serotype_1_2a_str_08-7374_1196185 | Listeria_monocytogenes_1639_v143 | 0.9435 |
| Listeria_monocytogenes_serotype_1_2a_str_08-6997_1196184 | Listeria_monocytogenes_1639_v143 | 0.9385 |
| Listeria_monocytogenes_serotype_1_2a_str_08-6569_1196183 | Listeria_monocytogenes_1639_v143 | 0.9385 |
| Listeria_monocytogenes_serotype_1_2a_str_08-6056_1196182 | Listeria_monocytogenes_1639_v143 | 0.9385 |
| Listeria_monocytogenes_serotype_1_2a_str_04-5457_1196181 | Listeria_monocytogenes_1639_v143 | 0.9435 |
| Listeria_monocytogenes_serotype_1_2a_str_02-5993_1196180 | Listeria_monocytogenes_1639_v143 | 0.9431 |
| Listeria_monocytogenes_R479a_1437838                     | Listeria_monocytogenes_1639_v143 | 0.9428 |
| Listeria_monocytogenes_N53-1_1234142                     | Listeria_monocytogenes_1639_v143 | 0.9172 |
| Listeria_monocytogenes_M7_1030009                        | Listeria_monocytogenes_1639_v143 | 0.9116 |
| Listeria_monocytogenes_LO28_393132                       | Listeria_monocytogenes_1639_v143 | 0.953  |
| Listeria_monocytogenes_L99_563174                        | Listeria_monocytogenes_1639_v143 | 0.9123 |
| Listeria_monocytogenes_L312_882094                       | Listeria_monocytogenes_1639_v143 | 0.9535 |
| Listeria_monocytogenes_J1816_930781                      | Listeria_monocytogenes_1639_v143 | 0.9322 |
| Listeria_monocytogenes_J1-220_930782                     | Listeria_monocytogenes_1639_v143 | 0.928  |
| Listeria_monocytogenes_J0161_393130                      | Listeria_monocytogenes_1639_v143 | 0.9568 |
| Listeria_monocytogenes_HCC23_552536                      | Listeria_monocytogenes_1639_v143 | 0.9119 |
| Listeria_monocytogenes_FSL_R2-561_393126                 | Listeria_monocytogenes_1639_v143 | 0.953  |
| Listeria_monocytogenes_FSL_J1-208_393119                 | Listeria_monocytogenes_1639_v143 | 0.9159 |
| Listeria_monocytogenes_FSL_J1-175_393118                 | Listeria_monocytogenes_1639_v143 | 0.9528 |
| Listeria_monocytogenes_Finland_1998_393127               | Listeria_monocytogenes_1639_v143 | 0.9736 |
| Listeria_monocytogenes_EGD-e_169963_v1                   | Listeria_monocytogenes_1639_v143 | 0.9629 |
| Listeria_monocytogenes_EGD-e_169963                      | Listeria_monocytogenes_1639_v143 | 0.9629 |
| Listeria_monocytogenes_EGD_1334565                       | Listeria_monocytogenes_1639_v143 | 0.9616 |
| Listeria_monocytogenes_CFSAN002349_1299895               | Listeria_monocytogenes_1639_v143 | 0.9518 |
| Listeria_monocytogenes_ATCC_19117_882095_v1              | Listeria_monocytogenes_1639_v143 | 0.948  |
| Listeria_monocytogenes_ATCC_19117_882095                 | Listeria_monocytogenes_1639_v143 | 0.948  |
| Listeria_monocytogenes_6179_1288295                      | Listeria_monocytogenes_1639_v143 | 0.9436 |
| Listeria_monocytogenes_1639_v9                           | Listeria_monocytogenes_1639_v143 | 0.9236 |
| Listeria_monocytogenes_1639_v99                          | Listeria_monocytogenes_1639_v143 | 0.933  |
| Listeria_monocytogenes_1639_v98                          | Listeria_monocytogenes_1639_v143 | 0.9465 |
| Listeria_monocytogenes_1639_v97                          | Listeria_monocytogenes_1639_v143 | 0.9428 |
| Listeria_monocytogenes_1639_v96                          | Listeria_monocytogenes_1639_v143 | 0.9323 |
| Listeria_monocytogenes_1639_v95                          | Listeria_monocytogenes_1639_v143 | 0.9323 |
| Listeria_monocytogenes_1639_v94                          | Listeria_monocytogenes_1639_v143 | 0.9323 |
| Listeria_monocytogenes_1639_v93                          | Listeria_monocytogenes_1639_v143 | 0.9555 |
| Listeria_monocytogenes_1639_v92                          | Listeria_monocytogenes_1639_v143 | 0.9327 |
| Listeria_monocytogenes_1639_v91                          | Listeria_monocytogenes_1639_v143 | 0.9352 |
| Listeria_monocytogenes_1639_v90                          | Listeria_monocytogenes_1639_v143 | 0.9465 |
| Listeria_monocytogenes_1639_v8                           | Listeria_monocytogenes_1639_v143 | 0.9322 |
| Listeria_monocytogenes_1639_v89                          | Listeria_monocytogenes_1639_v143 | 0.9425 |
| Listeria_monocytogenes_1639_v88                          | Listeria_monocytogenes_1639_v143 | 0.9544 |
| Listeria_monocytogenes_1639_v87                          | Listeria_monocytogenes_1639_v143 | 0.9488 |
| Listeria_monocytogenes_1639_v86                          | Listeria_monocytogenes_1639_v143 | 0.9485 |
| Listeria_monocytogenes_1639_v85                          | Listeria_monocytogenes_1639_v143 | 0.9366 |
| Listeria_monocytogenes_1639_v84                          | Listeria_monocytogenes_1639_v143 | 0.9588 |
| Listeria_monocytogenes_1639_v83                          | Listeria_monocytogenes_1639_v143 | 0.9368 |
| Listeria_monocytogenes_1639_v82                          | Listeria_monocytogenes_1639_v143 | 0.9361 |
| Listeria_monocytogenes_1639_v81                          | Listeria_monocytogenes_1639_v143 | 0.9536 |
| Listeria_monocytogenes_1639_v80                          | Listeria_monocytogenes_1639_v143 | 0.9432 |
| Listeria_monocytogenes_1639_v7                           | Listeria_monocytogenes_1639_v143 | 0.9322 |
| Listeria_monocytogenes_1639_v79                          | Listeria_monocytogenes_1639_v143 | 0.9514 |
| Listeria_monocytogenes_1639_v78                          | Listeria_monocytogenes_1639_v143 | 0.9529 |
| Listeria_monocytogenes_1639_v77                          | Listeria_monocytogenes_1639_v143 | 0.958  |
| Listeria_monocytogenes_1639_v76                          | Listeria_monocytogenes_1639_v143 | 0.9517 |
| Listeria_monocytogenes_1639_v75                          | Listeria_monocytogenes_1639_v143 | 0.9123 |
| Listeria_monocytogenes_1639_v74                          | Listeria_monocytogenes_1639_v143 | 0.9481 |
| Listeria_monocytogenes_1639_v73                          | Listeria_monocytogenes_1639_v143 | 0.9484 |
| Listeria_monocytogenes_1639_v72                          | Listeria_monocytogenes_1639_v143 | 0.9356 |
| Listeria_monocytogenes_1639_v71                          | Listeria_monocytogenes_1639_v143 | 0.9406 |
| Listeria_monocytogenes_1639_v70                          | Listeria_monocytogenes_1639_v143 | 0.9509 |
| Listeria_monocytogenes_1639_v6                           | Listeria_monocytogenes_1639_v143 | 0.9315 |
| Listeria_monocytogenes_1639_v69                          | Listeria_monocytogenes_1639_v143 | 0.9388 |
| Listeria_monocytogenes_1639_v68                          | Listeria_monocytogenes_1639_v143 | 0.9577 |
| Listeria_monocytogenes_1639_v67                          | Listeria_monocytogenes_1639_v143 | 0.9429 |
| Listeria_monocytogenes_1639_v66                          | Listeria_monocytogenes_1639_v143 | 0.964  |
| Listeria_monocytogenes_1639_v65                          | Listeria_monocytogenes_1639_v143 | 0.9463 |
| Listeria_monocytogenes_1639_v64                          | Listeria_monocytogenes_1639_v143 | 0.9571 |
| Listeria_monocytogenes_1639_v63                          | Listeria_monocytogenes_1639_v143 | 0.938  |
| Listeria_monocytogenes_1639_v62                          | Listeria_monocytogenes_1639_v143 | 0.9492 |
| Listeria_monocytogenes_1639_v61                          | Listeria_monocytogenes_1639_v143 | 0.9463 |
| Listeria_monocytogenes_1639_v60                          | Listeria_monocytogenes_1639_v143 | 0.9589 |



[illegible]

|                                                          |                                  |        |
|----------------------------------------------------------|----------------------------------|--------|
| Listeria_monocytogenes_1639_v157                         | Listeria_monocytogenes_1639_v143 | 0.9544 |
| Listeria_monocytogenes_1639_v156                         | Listeria_monocytogenes_1639_v143 | 0.9503 |
| Listeria_monocytogenes_1639_v155                         | Listeria_monocytogenes_1639_v143 | 0.96   |
| Listeria_monocytogenes_1639_v154                         | Listeria_monocytogenes_1639_v143 | 0.9627 |
| Listeria_monocytogenes_1639_v153                         | Listeria_monocytogenes_1639_v143 | 0.9607 |
| Listeria_monocytogenes_1639_v152                         | Listeria_monocytogenes_1639_v143 | 0.9517 |
| Listeria_monocytogenes_1639_v151                         | Listeria_monocytogenes_1639_v143 | 0.9517 |
| Listeria_monocytogenes_1639_v150                         | Listeria_monocytogenes_1639_v143 | 0.9634 |
| Listeria_monocytogenes_1639_v14                          | Listeria_monocytogenes_1639_v143 | 0.9292 |
| Listeria_monocytogenes_1639_v149                         | Listeria_monocytogenes_1639_v143 | 0.9616 |
| Listeria_monocytogenes_1639_v148                         | Listeria_monocytogenes_1639_v143 | 0.9503 |
| Listeria_monocytogenes_1639_v147                         | Listeria_monocytogenes_1639_v143 | 0.9366 |
| Listeria_monocytogenes_1639_v146                         | Listeria_monocytogenes_1639_v143 | 0.9779 |
| Listeria_monocytogenes_1639_v145                         | Listeria_monocytogenes_1639_v143 | 0.9745 |
| Listeria_monocytogenes_1639_v144                         | Listeria_monocytogenes_1639_v143 | 0.9528 |
| Listeria_monocytogenes_1639_v143                         | Listeria_monocytogenes_1639_v143 | 0.0694 |
| Listeria_welshimeri_1643                                 | Listeria_monocytogenes_1639_v144 | 0.8859 |
| Listeria_welshimeri_serovar_6b_str_SLCC5334_386043       | Listeria_monocytogenes_1639_v144 | 0.8852 |
| Listeria_seeligeri_serovar_1_2b_str_SLCC3954_683837      | Listeria_monocytogenes_1639_v144 | 0.8901 |
| Listeria_seeligeri_FSL_S4-171_702452                     | Listeria_monocytogenes_1639_v144 | 0.833  |
| Listeria_seeligeri_FSL_N1-067_702453                     | Listeria_monocytogenes_1639_v144 | 0.8311 |
| Listeria_seeligeri_1640_v1                               | Listeria_monocytogenes_1639_v144 | 0.8962 |
| Listeria_seeligeri_1640                                  | Listeria_monocytogenes_1639_v144 | 0.8885 |
| Listeria_monocytogenes_WSLC1042_1457188                  | Listeria_monocytogenes_1639_v144 | 0.9713 |
| Listeria_monocytogenes_WSLC1001_1457187                  | Listeria_monocytogenes_1639_v144 | 0.9378 |
| Listeria_monocytogenes_SLCC7179_879090                   | Listeria_monocytogenes_1639_v144 | 0.9426 |
| Listeria_monocytogenes_SLCC5850_882096                   | Listeria_monocytogenes_1639_v144 | 0.9425 |
| Listeria_monocytogenes_SLCC2755_932919                   | Listeria_monocytogenes_1639_v144 | 0.9529 |
| Listeria_monocytogenes_SLCC2540_879089                   | Listeria_monocytogenes_1639_v144 | 0.953  |
| Listeria_monocytogenes_SLCC2479_882020                   | Listeria_monocytogenes_1639_v144 | 0.9329 |
| Listeria_monocytogenes_SLCC2378_879088                   | Listeria_monocytogenes_1639_v144 | 0.9724 |
| Listeria_monocytogenes_SLCC2376_882097                   | Listeria_monocytogenes_1639_v144 | 0.95   |
| Listeria_monocytogenes_SLCC2372_932920                   | Listeria_monocytogenes_1639_v144 | 0.9256 |
| Listeria_monocytogenes_serotype_4b_str_LL195_1230340     | Listeria_monocytogenes_1639_v144 | 0.9788 |
| Listeria_monocytogenes_serotype_4b_str_LIS0087_1134669   | Listeria_monocytogenes_1639_v144 | 0.918  |
| Listeria_monocytogenes_serotype_4b_str_F2365_265669      | Listeria_monocytogenes_1639_v144 | 0.9788 |
| Listeria_monocytogenes_serotype_4b_str_CLIP_80459_568819 | Listeria_monocytogenes_1639_v144 | 0.9985 |
| Listeria_monocytogenes_serotype_4b_str_81-0861_1196161   | Listeria_monocytogenes_1639_v144 | 0.9605 |
| Listeria_monocytogenes_serotype_4b_str_81-0592_1196160   | Listeria_monocytogenes_1639_v144 | 0.9617 |
| Listeria_monocytogenes_serotype_4b_str_81-0558_1196159   | Listeria_monocytogenes_1639_v144 | 0.9628 |
| Listeria_monocytogenes_serotype_4b_str_10-0809_1196162   | Listeria_monocytogenes_1639_v144 | 0.962  |
| Listeria_monocytogenes_serotype_4b_str_02-6680_1196175   | Listeria_monocytogenes_1639_v144 | 0.9811 |
| Listeria_monocytogenes_serotype_4b_str_02-6679_1196174   | Listeria_monocytogenes_1639_v144 | 0.9811 |
| Listeria_monocytogenes_serotype_4b_str_02-1792_1196173   | Listeria_monocytogenes_1639_v144 | 0.9624 |
| Listeria_monocytogenes_serotype_4b_str_02-1289_1196172   | Listeria_monocytogenes_1639_v144 | 0.9624 |
| Listeria_monocytogenes_serotype_4b_str_02-1103_1196171   | Listeria_monocytogenes_1639_v144 | 0.9624 |
| Listeria_monocytogenes_serotype_3c_str_10-5027_1196195   | Listeria_monocytogenes_1639_v144 | 0.9321 |
| Listeria_monocytogenes_serotype_1_2c_str_10-5026_1196194 | Listeria_monocytogenes_1639_v144 | 0.9333 |
| Listeria_monocytogenes_serotype_1_2c_str_10-5025_1196193 | Listeria_monocytogenes_1639_v144 | 0.9333 |
| Listeria_monocytogenes_serotype_1_2b_str_10-0811_1196164 | Listeria_monocytogenes_1639_v144 | 0.9457 |
| Listeria_monocytogenes_serotype_1_2b_str_10-0810_1196163 | Listeria_monocytogenes_1639_v144 | 0.9457 |
| Listeria_monocytogenes_serotype_1_2a_str_99-6370_1196179 | Listeria_monocytogenes_1639_v144 | 0.9233 |
| Listeria_monocytogenes_serotype_1_2a_str_98-2035_1196178 | Listeria_monocytogenes_1639_v144 | 0.9233 |
| Listeria_monocytogenes_serotype_1_2a_str_95-0093_1196177 | Listeria_monocytogenes_1639_v144 | 0.9289 |
| Listeria_monocytogenes_serotype_1_2a_str_88-0478_1196176 | Listeria_monocytogenes_1639_v144 | 0.9281 |
| Listeria_monocytogenes_serotype_1_2a_str_10-5024_1196192 | Listeria_monocytogenes_1639_v144 | 0.9292 |
| Listeria_monocytogenes_serotype_1_2a_str_10-4758_1196168 | Listeria_monocytogenes_1639_v144 | 0.9433 |
| Listeria_monocytogenes_serotype_1_2a_str_10-4754_1196167 | Listeria_monocytogenes_1639_v144 | 0.943  |
| Listeria_monocytogenes_serotype_1_2a_str_10-1321_1196191 | Listeria_monocytogenes_1639_v144 | 0.9292 |
| Listeria_monocytogenes_serotype_1_2a_str_10-1047_1196190 | Listeria_monocytogenes_1639_v144 | 0.9296 |
| Listeria_monocytogenes_serotype_1_2a_str_10-1046_1196189 | Listeria_monocytogenes_1639_v144 | 0.9296 |
| Listeria_monocytogenes_serotype_1_2a_str_10-0934_1196170 | Listeria_monocytogenes_1639_v144 | 0.9527 |
| Listeria_monocytogenes_serotype_1_2a_str_10-0933_1196169 | Listeria_monocytogenes_1639_v144 | 0.9527 |
| Listeria_monocytogenes_serotype_1_2a_str_10-0815_1196188 | Listeria_monocytogenes_1639_v144 | 0.9247 |
| Listeria_monocytogenes_serotype_1_2a_str_10-0814_1196187 | Listeria_monocytogenes_1639_v144 | 0.9292 |
| Listeria_monocytogenes_serotype_1_2a_str_10-0813_1196166 | Listeria_monocytogenes_1639_v144 | 0.935  |
| Listeria_monocytogenes_serotype_1_2a_str_10-0812_1196165 | Listeria_monocytogenes_1639_v144 | 0.935  |
| Listeria_monocytogenes_serotype_1_2a_str_08-7669_1196186 | Listeria_monocytogenes_1639_v144 | 0.9384 |
| Listeria_monocytogenes_serotype_1_2a_str_08-7374_1196185 | Listeria_monocytogenes_1639_v144 | 0.9292 |
| Listeria_monocytogenes_serotype_1_2a_str_08-6997_1196184 | Listeria_monocytogenes_1639_v144 | 0.9247 |
| Listeria_monocytogenes_serotype_1_2a_str_08-6569_1196183 | Listeria_monocytogenes_1639_v144 | 0.9247 |
| Listeria_monocytogenes_serotype_1_2a_str_08-6056_1196182 | Listeria_monocytogenes_1639_v144 | 0.9247 |
| Listeria_monocytogenes_serotype_1_2a_str_04-5457_1196181 | Listeria_monocytogenes_1639_v144 | 0.9292 |
| Listeria_monocytogenes_serotype_1_2a_str_02-5993_1196180 | Listeria_monocytogenes_1639_v144 | 0.9289 |
| Listeria_monocytogenes_R479a_1437838                     | Listeria_monocytogenes_1639_v144 | 0.9282 |
| Listeria_monocytogenes_N53-1_1234142                     | Listeria_monocytogenes_1639_v144 | 0.8984 |
| Listeria_monocytogenes_M7_1030009                        | Listeria_monocytogenes_1639_v144 | 0.9147 |
| Listeria_monocytogenes_LO28_393132                       | Listeria_monocytogenes_1639_v144 | 0.9315 |
| Listeria_monocytogenes_L99_563174                        | Listeria_monocytogenes_1639_v144 | 0.9154 |
| Listeria_monocytogenes_L312_882094                       | Listeria_monocytogenes_1639_v144 | 0.9988 |
| Listeria_monocytogenes_J1816_930781                      | Listeria_monocytogenes_1639_v144 | 0.9565 |
| Listeria_monocytogenes_J1-220_930782                     | Listeria_monocytogenes_1639_v144 | 0.9522 |
| Listeria_monocytogenes_J0161_393130                      | Listeria_monocytogenes_1639_v144 | 0.9353 |
| Listeria_monocytogenes_HCC23_552536                      | Listeria_monocytogenes_1639_v144 | 0.9147 |
| Listeria_monocytogenes_FSL_R2-561_393126                 | Listeria_monocytogenes_1639_v144 | 0.9315 |
| Listeria_monocytogenes_FSL_J1-208_393119                 | Listeria_monocytogenes_1639_v144 | 0.9221 |
| Listeria_monocytogenes_FSL_J1-175_393118                 | Listeria_monocytogenes_1639_v144 | 0.9563 |
| Listeria_monocytogenes_Finland_1998_393127               | Listeria_monocytogenes_1639_v144 | 0.9534 |
| Listeria_monocytogenes_EGD-e_169963_v1                   | Listeria_monocytogenes_1639_v144 | 0.9407 |
| Listeria_monocytogenes_EGD-e_169963                      | Listeria_monocytogenes_1639_v144 | 0.9411 |
| Listeria_monocytogenes_EGD_1334565                       | Listeria_monocytogenes_1639_v144 | 0.9432 |

[illegible]

|                                                          |                                  |        |
|----------------------------------------------------------|----------------------------------|--------|
| Listeria_monocytogenes_1639_v20                          | Listeria_monocytogenes_1639_v144 | 0.9404 |
| Listeria_monocytogenes_1639_v1                           | Listeria_monocytogenes_1639_v144 | 0.9083 |
| Listeria_monocytogenes_1639_v19                          | Listeria_monocytogenes_1639_v144 | 0.94   |
| Listeria_monocytogenes_1639_v198                         | Listeria_monocytogenes_1639_v144 | 0.9019 |
| Listeria_monocytogenes_1639_v197                         | Listeria_monocytogenes_1639_v144 | 0.9286 |
| Listeria_monocytogenes_1639_v196                         | Listeria_monocytogenes_1639_v144 | 0.9259 |
| Listeria_monocytogenes_1639_v195                         | Listeria_monocytogenes_1639_v144 | 0.9503 |
| Listeria_monocytogenes_1639_v194                         | Listeria_monocytogenes_1639_v144 | 0.9508 |
| Listeria_monocytogenes_1639_v193                         | Listeria_monocytogenes_1639_v144 | 0.9508 |
| Listeria_monocytogenes_1639_v192                         | Listeria_monocytogenes_1639_v144 | 0.9146 |
| Listeria_monocytogenes_1639_v191                         | Listeria_monocytogenes_1639_v144 | 0.9564 |
| Listeria_monocytogenes_1639_v190                         | Listeria_monocytogenes_1639_v144 | 0.9545 |
| Listeria_monocytogenes_1639_v18                          | Listeria_monocytogenes_1639_v144 | 0.9473 |
| Listeria_monocytogenes_1639_v189                         | Listeria_monocytogenes_1639_v144 | 0.9538 |
| Listeria_monocytogenes_1639_v188                         | Listeria_monocytogenes_1639_v144 | 0.9576 |
| Listeria_monocytogenes_1639_v187                         | Listeria_monocytogenes_1639_v144 | 0.9541 |
| Listeria_monocytogenes_1639_v186                         | Listeria_monocytogenes_1639_v144 | 0.9549 |
| Listeria_monocytogenes_1639_v185                         | Listeria_monocytogenes_1639_v144 | 0.9545 |
| Listeria_monocytogenes_1639_v184                         | Listeria_monocytogenes_1639_v144 | 0.9537 |
| Listeria_monocytogenes_1639_v183                         | Listeria_monocytogenes_1639_v144 | 0.9522 |
| Listeria_monocytogenes_1639_v182                         | Listeria_monocytogenes_1639_v144 | 0.954  |
| Listeria_monocytogenes_1639_v181                         | Listeria_monocytogenes_1639_v144 | 0.94   |
| Listeria_monocytogenes_1639_v180                         | Listeria_monocytogenes_1639_v144 | 0.94   |
| Listeria_monocytogenes_1639_v17                          | Listeria_monocytogenes_1639_v144 | 0.9473 |
| Listeria_monocytogenes_1639_v179                         | Listeria_monocytogenes_1639_v144 | 0.9392 |
| Listeria_monocytogenes_1639_v178                         | Listeria_monocytogenes_1639_v144 | 0.953  |
| Listeria_monocytogenes_1639_v177                         | Listeria_monocytogenes_1639_v144 | 0.9769 |
| Listeria_monocytogenes_1639_v176                         | Listeria_monocytogenes_1639_v144 | 0.9477 |
| Listeria_monocytogenes_1639_v175                         | Listeria_monocytogenes_1639_v144 | 0.943  |
| Listeria_monocytogenes_1639_v174                         | Listeria_monocytogenes_1639_v144 | 0.955  |
| Listeria_monocytogenes_1639_v173                         | Listeria_monocytogenes_1639_v144 | 0.9705 |
| Listeria_monocytogenes_1639_v172                         | Listeria_monocytogenes_1639_v144 | 0.9452 |
| Listeria_monocytogenes_1639_v171                         | Listeria_monocytogenes_1639_v144 | 0.9396 |
| Listeria_monocytogenes_1639_v170                         | Listeria_monocytogenes_1639_v144 | 0.9479 |
| Listeria_monocytogenes_1639_v16                          | Listeria_monocytogenes_1639_v144 | 0.9155 |
| Listeria_monocytogenes_1639_v169                         | Listeria_monocytogenes_1639_v144 | 0.9503 |
| Listeria_monocytogenes_1639_v168                         | Listeria_monocytogenes_1639_v144 | 0.9488 |
| Listeria_monocytogenes_1639_v167                         | Listeria_monocytogenes_1639_v144 | 0.9409 |
| Listeria_monocytogenes_1639_v166                         | Listeria_monocytogenes_1639_v144 | 0.9492 |
| Listeria_monocytogenes_1639_v165                         | Listeria_monocytogenes_1639_v144 | 0.9503 |
| Listeria_monocytogenes_1639_v164                         | Listeria_monocytogenes_1639_v144 | 0.978  |
| Listeria_monocytogenes_1639_v163                         | Listeria_monocytogenes_1639_v144 | 0.9672 |
| Listeria_monocytogenes_1639_v162                         | Listeria_monocytogenes_1639_v144 | 0.978  |
| Listeria_monocytogenes_1639_v161                         | Listeria_monocytogenes_1639_v144 | 0.9791 |
| Listeria_monocytogenes_1639_v160                         | Listeria_monocytogenes_1639_v144 | 0.9795 |
| Listeria_monocytogenes_1639_v15                          | Listeria_monocytogenes_1639_v144 | 0.9302 |
| Listeria_monocytogenes_1639_v159                         | Listeria_monocytogenes_1639_v144 | 0.9769 |
| Listeria_monocytogenes_1639_v158                         | Listeria_monocytogenes_1639_v144 | 0.9791 |
| Listeria_monocytogenes_1639_v157                         | Listeria_monocytogenes_1639_v144 | 0.9788 |
| Listeria_monocytogenes_1639_v156                         | Listeria_monocytogenes_1639_v144 | 0.931  |
| Listeria_monocytogenes_1639_v155                         | Listeria_monocytogenes_1639_v144 | 0.9454 |
| Listeria_monocytogenes_1639_v154                         | Listeria_monocytogenes_1639_v144 | 0.9481 |
| Listeria_monocytogenes_1639_v153                         | Listeria_monocytogenes_1639_v144 | 0.9462 |
| Listeria_monocytogenes_1639_v152                         | Listeria_monocytogenes_1639_v144 | 0.9772 |
| Listeria_monocytogenes_1639_v151                         | Listeria_monocytogenes_1639_v144 | 0.9772 |
| Listeria_monocytogenes_1639_v150                         | Listeria_monocytogenes_1639_v144 | 0.9443 |
| Listeria_monocytogenes_1639_v14                          | Listeria_monocytogenes_1639_v144 | 0.9372 |
| Listeria_monocytogenes_1639_v149                         | Listeria_monocytogenes_1639_v144 | 0.9432 |
| Listeria_monocytogenes_1639_v148                         | Listeria_monocytogenes_1639_v144 | 0.9757 |
| Listeria_monocytogenes_1639_v147                         | Listeria_monocytogenes_1639_v144 | 0.9613 |
| Listeria_monocytogenes_1639_v146                         | Listeria_monocytogenes_1639_v144 | 0.9558 |
| Listeria_monocytogenes_1639_v145                         | Listeria_monocytogenes_1639_v144 | 0.9498 |
| Listeria_monocytogenes_1639_v144                         | Listeria_monocytogenes_1639_v144 | 0.0653 |
| Listeria_welshimeri_1643                                 | Listeria_monocytogenes_1639_v145 | 0.8794 |
| Listeria_welshimeri_serovar_6b_str_SLCC5334_386043       | Listeria_monocytogenes_1639_v145 | 0.8791 |
| Listeria_seeligeri_serovar_1_2b_str_SLCC3954_683837      | Listeria_monocytogenes_1639_v145 | 0.8874 |
| Listeria_seeligeri_FSL_S4-171_702452                     | Listeria_monocytogenes_1639_v145 | 0.8224 |
| Listeria_seeligeri_FSL_N1-067_702453                     | Listeria_monocytogenes_1639_v145 | 0.8322 |
| Listeria_seeligeri_1640_v1                               | Listeria_monocytogenes_1639_v145 | 0.8873 |
| Listeria_seeligeri_1640                                  | Listeria_monocytogenes_1639_v145 | 0.8782 |
| Listeria_monocytogenes_WSLC1042_1457188                  | Listeria_monocytogenes_1639_v145 | 0.9421 |
| Listeria_monocytogenes_WSLC1001_1457187                  | Listeria_monocytogenes_1639_v145 | 0.9538 |
| Listeria_monocytogenes_SLCC7179_879090                   | Listeria_monocytogenes_1639_v145 | 0.9634 |
| Listeria_monocytogenes_SLCC5850_882096                   | Listeria_monocytogenes_1639_v145 | 0.9582 |
| Listeria_monocytogenes_SLCC2755_932919                   | Listeria_monocytogenes_1639_v145 | 0.9377 |
| Listeria_monocytogenes_SLCC2540_879089                   | Listeria_monocytogenes_1639_v145 | 0.9439 |
| Listeria_monocytogenes_SLCC2479_882020                   | Listeria_monocytogenes_1639_v145 | 0.9488 |
| Listeria_monocytogenes_SLCC2378_879088                   | Listeria_monocytogenes_1639_v145 | 0.9432 |
| Listeria_monocytogenes_SLCC2376_882097                   | Listeria_monocytogenes_1639_v145 | 0.9477 |
| Listeria_monocytogenes_SLCC2372_932920                   | Listeria_monocytogenes_1639_v145 | 0.9417 |
| Listeria_monocytogenes_serotype_4b_str_LL195_1230340     | Listeria_monocytogenes_1639_v145 | 0.9471 |
| Listeria_monocytogenes_serotype_4b_str_LIS0087_1134669   | Listeria_monocytogenes_1639_v145 | 0.935  |
| Listeria_monocytogenes_serotype_4b_str_F2365_265669      | Listeria_monocytogenes_1639_v145 | 0.9471 |
| Listeria_monocytogenes_serotype_4b_str_CLIP_80459_568819 | Listeria_monocytogenes_1639_v145 | 0.9505 |
| Listeria_monocytogenes_serotype_4b_str_81-0861_1196161   | Listeria_monocytogenes_1639_v145 | 0.9325 |
| Listeria_monocytogenes_serotype_4b_str_81-0592_1196160   | Listeria_monocytogenes_1639_v145 | 0.9336 |
| Listeria_monocytogenes_serotype_4b_str_81-0558_1196159   | Listeria_monocytogenes_1639_v145 | 0.9339 |
| Listeria_monocytogenes_serotype_4b_str_10-0809_1196162   | Listeria_monocytogenes_1639_v145 | 0.9336 |
| Listeria_monocytogenes_serotype_4b_str_02-6680_1196175   | Listeria_monocytogenes_1639_v145 | 0.9456 |
| Listeria_monocytogenes_serotype_4b_str_02-6679_1196174   | Listeria_monocytogenes_1639_v145 | 0.9456 |
| Listeria_monocytogenes_serotype_4b_str_02-1792_1196173   | Listeria_monocytogenes_1639_v145 | 0.9336 |

|                                                          |                                  |        |
|----------------------------------------------------------|----------------------------------|--------|
| Listeria_monocytogenes_serotype_4b_str_02-1289_1196172   | Listeria_monocytogenes_1639_v145 | 0.9336 |
| Listeria_monocytogenes_serotype_4b_str_02-1103_1196171   | Listeria_monocytogenes_1639_v145 | 0.9336 |
| Listeria_monocytogenes_serotype_3c_str_10-5027_1196195   | Listeria_monocytogenes_1639_v145 | 0.9481 |
| Listeria_monocytogenes_serotype_1_2c_str_10-5026_1196194 | Listeria_monocytogenes_1639_v145 | 0.9488 |
| Listeria_monocytogenes_serotype_1_2c_str_10-5025_1196193 | Listeria_monocytogenes_1639_v145 | 0.9488 |
| Listeria_monocytogenes_serotype_1_2b_str_10-0811_1196164 | Listeria_monocytogenes_1639_v145 | 0.9298 |
| Listeria_monocytogenes_serotype_1_2b_str_10-0810_1196163 | Listeria_monocytogenes_1639_v145 | 0.9298 |
| Listeria_monocytogenes_serotype_1_2a_str_99-6370_1196179 | Listeria_monocytogenes_1639_v145 | 0.9342 |
| Listeria_monocytogenes_serotype_1_2a_str_98-2035_1196178 | Listeria_monocytogenes_1639_v145 | 0.9342 |
| Listeria_monocytogenes_serotype_1_2a_str_95-0093_1196177 | Listeria_monocytogenes_1639_v145 | 0.9402 |
| Listeria_monocytogenes_serotype_1_2a_str_88-0478_1196176 | Listeria_monocytogenes_1639_v145 | 0.939  |
| Listeria_monocytogenes_serotype_1_2a_str_10-5024_1196192 | Listeria_monocytogenes_1639_v145 | 0.9402 |
| Listeria_monocytogenes_serotype_1_2a_str_10-4758_1196168 | Listeria_monocytogenes_1639_v145 | 0.9575 |
| Listeria_monocytogenes_serotype_1_2a_str_10-4754_1196167 | Listeria_monocytogenes_1639_v145 | 0.9579 |
| Listeria_monocytogenes_serotype_1_2a_str_10-1321_1196191 | Listeria_monocytogenes_1639_v145 | 0.9402 |
| Listeria_monocytogenes_serotype_1_2a_str_10-1047_1196190 | Listeria_monocytogenes_1639_v145 | 0.9409 |
| Listeria_monocytogenes_serotype_1_2a_str_10-1046_1196189 | Listeria_monocytogenes_1639_v145 | 0.9409 |
| Listeria_monocytogenes_serotype_1_2a_str_10-0934_1196170 | Listeria_monocytogenes_1639_v145 | 0.9709 |
| Listeria_monocytogenes_serotype_1_2a_str_10-0933_1196169 | Listeria_monocytogenes_1639_v145 | 0.9709 |
| Listeria_monocytogenes_serotype_1_2a_str_10-0815_1196188 | Listeria_monocytogenes_1639_v145 | 0.9356 |
| Listeria_monocytogenes_serotype_1_2a_str_10-0814_1196187 | Listeria_monocytogenes_1639_v145 | 0.9402 |
| Listeria_monocytogenes_serotype_1_2a_str_10-0813_1196166 | Listeria_monocytogenes_1639_v145 | 0.9513 |
| Listeria_monocytogenes_serotype_1_2a_str_10-0812_1196165 | Listeria_monocytogenes_1639_v145 | 0.9513 |
| Listeria_monocytogenes_serotype_1_2a_str_08-7669_1196186 | Listeria_monocytogenes_1639_v145 | 0.9502 |
| Listeria_monocytogenes_serotype_1_2a_str_08-7374_1196185 | Listeria_monocytogenes_1639_v145 | 0.9402 |
| Listeria_monocytogenes_serotype_1_2a_str_08-6997_1196184 | Listeria_monocytogenes_1639_v145 | 0.9356 |
| Listeria_monocytogenes_serotype_1_2a_str_08-6569_1196183 | Listeria_monocytogenes_1639_v145 | 0.9356 |
| Listeria_monocytogenes_serotype_1_2a_str_08-6056_1196182 | Listeria_monocytogenes_1639_v145 | 0.9356 |
| Listeria_monocytogenes_serotype_1_2a_str_04-5457_1196181 | Listeria_monocytogenes_1639_v145 | 0.9402 |
| Listeria_monocytogenes_serotype_1_2a_str_02-5993_1196180 | Listeria_monocytogenes_1639_v145 | 0.9402 |
| Listeria_monocytogenes_R479a_1437838                     | Listeria_monocytogenes_1639_v145 | 0.941  |
| Listeria_monocytogenes_N53-1_1234142                     | Listeria_monocytogenes_1639_v145 | 0.9154 |
| Listeria_monocytogenes_M7_1030009                        | Listeria_monocytogenes_1639_v145 | 0.9094 |
| Listeria_monocytogenes_LO28_393132                       | Listeria_monocytogenes_1639_v145 | 0.9474 |
| Listeria_monocytogenes_L99_563174                        | Listeria_monocytogenes_1639_v145 | 0.9098 |
| Listeria_monocytogenes_L312_882094                       | Listeria_monocytogenes_1639_v145 | 0.9501 |
| Listeria_monocytogenes_J1816_930781                      | Listeria_monocytogenes_1639_v145 | 0.9255 |
| Listeria_monocytogenes_J1-220_930782                     | Listeria_monocytogenes_1639_v145 | 0.9243 |
| Listeria_monocytogenes_J0161_393130                      | Listeria_monocytogenes_1639_v145 | 0.958  |
| Listeria_monocytogenes_HCC23_552536                      | Listeria_monocytogenes_1639_v145 | 0.9094 |
| Listeria_monocytogenes_FSL_R2-561_393126                 | Listeria_monocytogenes_1639_v145 | 0.9474 |
| Listeria_monocytogenes_FSL_J1-208_393119                 | Listeria_monocytogenes_1639_v145 | 0.9148 |
| Listeria_monocytogenes_FSL_J1-175_393118                 | Listeria_monocytogenes_1639_v145 | 0.9452 |
| Listeria_monocytogenes_Finland_1998_393127               | Listeria_monocytogenes_1639_v145 | 0.9705 |
| Listeria_monocytogenes_EGD-e_169963_v1                   | Listeria_monocytogenes_1639_v145 | 0.9591 |
| Listeria_monocytogenes_EGD-e_169963                      | Listeria_monocytogenes_1639_v145 | 0.9591 |
| Listeria_monocytogenes_EGD_1334565                       | Listeria_monocytogenes_1639_v145 | 0.959  |
| Listeria_monocytogenes_CFSAN002349_1299895               | Listeria_monocytogenes_1639_v145 | 0.9468 |
| Listeria_monocytogenes_ATCC_19117_882095_v1              | Listeria_monocytogenes_1639_v145 | 0.9442 |
| Listeria_monocytogenes_ATCC_19117_882095                 | Listeria_monocytogenes_1639_v145 | 0.9438 |
| Listeria_monocytogenes_6179_1288295                      | Listeria_monocytogenes_1639_v145 | 0.9385 |
| Listeria_monocytogenes_1639_v9                           | Listeria_monocytogenes_1639_v145 | 0.9159 |
| Listeria_monocytogenes_1639_v99                          | Listeria_monocytogenes_1639_v145 | 0.9267 |
| Listeria_monocytogenes_1639_v98                          | Listeria_monocytogenes_1639_v145 | 0.9428 |
| Listeria_monocytogenes_1639_v97                          | Listeria_monocytogenes_1639_v145 | 0.9356 |
| Listeria_monocytogenes_1639_v96                          | Listeria_monocytogenes_1639_v145 | 0.9256 |
| Listeria_monocytogenes_1639_v95                          | Listeria_monocytogenes_1639_v145 | 0.9256 |
| Listeria_monocytogenes_1639_v94                          | Listeria_monocytogenes_1639_v145 | 0.9263 |
| Listeria_monocytogenes_1639_v93                          | Listeria_monocytogenes_1639_v145 | 0.9454 |
| Listeria_monocytogenes_1639_v92                          | Listeria_monocytogenes_1639_v145 | 0.9263 |
| Listeria_monocytogenes_1639_v91                          | Listeria_monocytogenes_1639_v145 | 0.9285 |
| Listeria_monocytogenes_1639_v90                          | Listeria_monocytogenes_1639_v145 | 0.9428 |
| Listeria_monocytogenes_1639_v8                           | Listeria_monocytogenes_1639_v145 | 0.9297 |
| Listeria_monocytogenes_1639_v89                          | Listeria_monocytogenes_1639_v145 | 0.9361 |
| Listeria_monocytogenes_1639_v88                          | Listeria_monocytogenes_1639_v145 | 0.9502 |
| Listeria_monocytogenes_1639_v87                          | Listeria_monocytogenes_1639_v145 | 0.9459 |
| Listeria_monocytogenes_1639_v86                          | Listeria_monocytogenes_1639_v145 | 0.9463 |
| Listeria_monocytogenes_1639_v85                          | Listeria_monocytogenes_1639_v145 | 0.9322 |
| Listeria_monocytogenes_1639_v84                          | Listeria_monocytogenes_1639_v145 | 0.9524 |
| Listeria_monocytogenes_1639_v83                          | Listeria_monocytogenes_1639_v145 | 0.9331 |
| Listeria_monocytogenes_1639_v82                          | Listeria_monocytogenes_1639_v145 | 0.9328 |
| Listeria_monocytogenes_1639_v81                          | Listeria_monocytogenes_1639_v145 | 0.9506 |
| Listeria_monocytogenes_1639_v80                          | Listeria_monocytogenes_1639_v145 | 0.9345 |
| Listeria_monocytogenes_1639_v7                           | Listeria_monocytogenes_1639_v145 | 0.9297 |
| Listeria_monocytogenes_1639_v79                          | Listeria_monocytogenes_1639_v145 | 0.9488 |
| Listeria_monocytogenes_1639_v78                          | Listeria_monocytogenes_1639_v145 | 0.9499 |
| Listeria_monocytogenes_1639_v77                          | Listeria_monocytogenes_1639_v145 | 0.9565 |
| Listeria_monocytogenes_1639_v76                          | Listeria_monocytogenes_1639_v145 | 0.9412 |
| Listeria_monocytogenes_1639_v75                          | Listeria_monocytogenes_1639_v145 | 0.9098 |
| Listeria_monocytogenes_1639_v74                          | Listeria_monocytogenes_1639_v145 | 0.9482 |
| Listeria_monocytogenes_1639_v73                          | Listeria_monocytogenes_1639_v145 | 0.9428 |
| Listeria_monocytogenes_1639_v72                          | Listeria_monocytogenes_1639_v145 | 0.9315 |
| Listeria_monocytogenes_1639_v71                          | Listeria_monocytogenes_1639_v145 | 0.9399 |
| Listeria_monocytogenes_1639_v70                          | Listeria_monocytogenes_1639_v145 | 0.9449 |
| Listeria_monocytogenes_1639_v6                           | Listeria_monocytogenes_1639_v145 | 0.9294 |
| Listeria_monocytogenes_1639_v69                          | Listeria_monocytogenes_1639_v145 | 0.9336 |
| Listeria_monocytogenes_1639_v68                          | Listeria_monocytogenes_1639_v145 | 0.959  |
| Listeria_monocytogenes_1639_v67                          | Listeria_monocytogenes_1639_v145 | 0.9369 |
| Listeria_monocytogenes_1639_v66                          | Listeria_monocytogenes_1639_v145 | 0.9572 |
| Listeria_monocytogenes_1639_v65                          | Listeria_monocytogenes_1639_v145 | 0.943  |
| Listeria_monocytogenes_1639_v64                          | Listeria_monocytogenes_1639_v145 | 0.9803 |

[illegible]



|                                                          |                                  |        |
|----------------------------------------------------------|----------------------------------|--------|
| Listeria_monocytogenes_1639_v160                         | Listeria_monocytogenes_1639_v145 | 0.9479 |
| Listeria_monocytogenes_1639_v15                          | Listeria_monocytogenes_1639_v145 | 0.9154 |
| Listeria_monocytogenes_1639_v159                         | Listeria_monocytogenes_1639_v145 | 0.9449 |
| Listeria_monocytogenes_1639_v158                         | Listeria_monocytogenes_1639_v145 | 0.9471 |
| Listeria_monocytogenes_1639_v157                         | Listeria_monocytogenes_1639_v145 | 0.9471 |
| Listeria_monocytogenes_1639_v156                         | Listeria_monocytogenes_1639_v145 | 0.9503 |
| Listeria_monocytogenes_1639_v155                         | Listeria_monocytogenes_1639_v145 | 0.9562 |
| Listeria_monocytogenes_1639_v154                         | Listeria_monocytogenes_1639_v145 | 0.9593 |
| Listeria_monocytogenes_1639_v153                         | Listeria_monocytogenes_1639_v145 | 0.9569 |
| Listeria_monocytogenes_1639_v152                         | Listeria_monocytogenes_1639_v145 | 0.9449 |
| Listeria_monocytogenes_1639_v151                         | Listeria_monocytogenes_1639_v145 | 0.9449 |
| Listeria_monocytogenes_1639_v150                         | Listeria_monocytogenes_1639_v145 | 0.9616 |
| Listeria_monocytogenes_1639_v14                          | Listeria_monocytogenes_1639_v145 | 0.9222 |
| Listeria_monocytogenes_1639_v149                         | Listeria_monocytogenes_1639_v145 | 0.9593 |
| Listeria_monocytogenes_1639_v148                         | Listeria_monocytogenes_1639_v145 | 0.9438 |
| Listeria_monocytogenes_1639_v147                         | Listeria_monocytogenes_1639_v145 | 0.9317 |
| Listeria_monocytogenes_1639_v146                         | Listeria_monocytogenes_1639_v145 | 0.9702 |
| Listeria_monocytogenes_1639_v145                         | Listeria_monocytogenes_1639_v145 | 0.0672 |
| Listeria_welshimeri_1643                                 | Listeria_monocytogenes_1639_v146 | 0.8822 |
| Listeria_welshimeri_serovar_6b_str_SLCC5334_386043       | Listeria_monocytogenes_1639_v146 | 0.8815 |
| Listeria_seeligeri_serovar_1_2b_str_SLCC3954_683837      | Listeria_monocytogenes_1639_v146 | 0.8934 |
| Listeria_seeligeri_FSL_S4-171_702452                     | Listeria_monocytogenes_1639_v146 | 0.8266 |
| Listeria_seeligeri_FSL_N1-067_702453                     | Listeria_monocytogenes_1639_v146 | 0.8376 |
| Listeria_seeligeri_1640_v1                               | Listeria_monocytogenes_1639_v146 | 0.8964 |
| Listeria_seeligeri_1640                                  | Listeria_monocytogenes_1639_v146 | 0.8836 |
| Listeria_monocytogenes_WSLC1042_1457188                  | Listeria_monocytogenes_1639_v146 | 0.9455 |
| Listeria_monocytogenes_WSLC1001_1457187                  | Listeria_monocytogenes_1639_v146 | 0.9575 |
| Listeria_monocytogenes_SLCC7179_879090                   | Listeria_monocytogenes_1639_v146 | 0.9653 |
| Listeria_monocytogenes_SLCC5850_882096                   | Listeria_monocytogenes_1639_v146 | 0.9623 |
| Listeria_monocytogenes_SLCC2755_932919                   | Listeria_monocytogenes_1639_v146 | 0.9463 |
| Listeria_monocytogenes_SLCC2540_879089                   | Listeria_monocytogenes_1639_v146 | 0.9506 |
| Listeria_monocytogenes_SLCC2479_882020                   | Listeria_monocytogenes_1639_v146 | 0.9567 |
| Listeria_monocytogenes_SLCC2378_879088                   | Listeria_monocytogenes_1639_v146 | 0.9469 |
| Listeria_monocytogenes_SLCC2376_882097                   | Listeria_monocytogenes_1639_v146 | 0.9518 |
| Listeria_monocytogenes_SLCC2372_932920                   | Listeria_monocytogenes_1639_v146 | 0.9495 |
| Listeria_monocytogenes_serotype_4b_str_LL195_1230340     | Listeria_monocytogenes_1639_v146 | 0.9532 |
| Listeria_monocytogenes_serotype_4b_str_LIS0087_1134669   | Listeria_monocytogenes_1639_v146 | 0.938  |
| Listeria_monocytogenes_serotype_4b_str_F2365_265669      | Listeria_monocytogenes_1639_v146 | 0.9532 |
| Listeria_monocytogenes_serotype_4b_str_CLIP_80459_568819 | Listeria_monocytogenes_1639_v146 | 0.9566 |
| Listeria_monocytogenes_serotype_4b_str_81-0861_1196161   | Listeria_monocytogenes_1639_v146 | 0.9357 |
| Listeria_monocytogenes_serotype_4b_str_81-0592_1196160   | Listeria_monocytogenes_1639_v146 | 0.9368 |
| Listeria_monocytogenes_serotype_4b_str_81-0558_1196159   | Listeria_monocytogenes_1639_v146 | 0.9375 |
| Listeria_monocytogenes_serotype_4b_str_10-0809_1196162   | Listeria_monocytogenes_1639_v146 | 0.9368 |
| Listeria_monocytogenes_serotype_4b_str_02-6680_1196175   | Listeria_monocytogenes_1639_v146 | 0.9517 |
| Listeria_monocytogenes_serotype_4b_str_02-6679_1196174   | Listeria_monocytogenes_1639_v146 | 0.9517 |
| Listeria_monocytogenes_serotype_4b_str_02-1792_1196173   | Listeria_monocytogenes_1639_v146 | 0.9372 |
| Listeria_monocytogenes_serotype_4b_str_02-1289_1196172   | Listeria_monocytogenes_1639_v146 | 0.9372 |
| Listeria_monocytogenes_serotype_4b_str_02-1103_1196171   | Listeria_monocytogenes_1639_v146 | 0.9372 |
| Listeria_monocytogenes_serotype_3c_str_10-5027_1196195   | Listeria_monocytogenes_1639_v146 | 0.9559 |
| Listeria_monocytogenes_serotype_1_2c_str_10-5026_1196194 | Listeria_monocytogenes_1639_v146 | 0.9571 |
| Listeria_monocytogenes_serotype_1_2c_str_10-5025_1196193 | Listeria_monocytogenes_1639_v146 | 0.9571 |
| Listeria_monocytogenes_serotype_1_2b_str_10-0811_1196164 | Listeria_monocytogenes_1639_v146 | 0.9387 |
| Listeria_monocytogenes_serotype_1_2b_str_10-0810_1196163 | Listeria_monocytogenes_1639_v146 | 0.9387 |
| Listeria_monocytogenes_serotype_1_2a_str_99-6370_1196179 | Listeria_monocytogenes_1639_v146 | 0.94   |
| Listeria_monocytogenes_serotype_1_2a_str_98-2035_1196178 | Listeria_monocytogenes_1639_v146 | 0.94   |
| Listeria_monocytogenes_serotype_1_2a_str_95-0093_1196177 | Listeria_monocytogenes_1639_v146 | 0.9461 |
| Listeria_monocytogenes_serotype_1_2a_str_88-0478_1196176 | Listeria_monocytogenes_1639_v146 | 0.9453 |
| Listeria_monocytogenes_serotype_1_2a_str_10-5024_1196192 | Listeria_monocytogenes_1639_v146 | 0.9464 |
| Listeria_monocytogenes_serotype_1_2a_str_10-4758_1196168 | Listeria_monocytogenes_1639_v146 | 0.9624 |
| Listeria_monocytogenes_serotype_1_2a_str_10-4754_1196167 | Listeria_monocytogenes_1639_v146 | 0.9624 |
| Listeria_monocytogenes_serotype_1_2a_str_10-1321_1196191 | Listeria_monocytogenes_1639_v146 | 0.9464 |
| Listeria_monocytogenes_serotype_1_2a_str_10-1047_1196190 | Listeria_monocytogenes_1639_v146 | 0.9468 |
| Listeria_monocytogenes_serotype_1_2a_str_10-1046_1196189 | Listeria_monocytogenes_1639_v146 | 0.9468 |
| Listeria_monocytogenes_serotype_1_2a_str_10-0934_1196170 | Listeria_monocytogenes_1639_v146 | 0.9759 |
| Listeria_monocytogenes_serotype_1_2a_str_10-0933_1196169 | Listeria_monocytogenes_1639_v146 | 0.9759 |
| Listeria_monocytogenes_serotype_1_2a_str_10-0815_1196188 | Listeria_monocytogenes_1639_v146 | 0.9414 |
| Listeria_monocytogenes_serotype_1_2a_str_10-0814_1196187 | Listeria_monocytogenes_1639_v146 | 0.9461 |
| Listeria_monocytogenes_serotype_1_2a_str_10-0813_1196166 | Listeria_monocytogenes_1639_v146 | 0.955  |
| Listeria_monocytogenes_serotype_1_2a_str_10-0812_1196165 | Listeria_monocytogenes_1639_v146 | 0.955  |
| Listeria_monocytogenes_serotype_1_2a_str_08-7669_1196186 | Listeria_monocytogenes_1639_v146 | 0.9562 |
| Listeria_monocytogenes_serotype_1_2a_str_08-7374_1196185 | Listeria_monocytogenes_1639_v146 | 0.9464 |
| Listeria_monocytogenes_serotype_1_2a_str_08-6997_1196184 | Listeria_monocytogenes_1639_v146 | 0.9414 |
| Listeria_monocytogenes_serotype_1_2a_str_08-6569_1196183 | Listeria_monocytogenes_1639_v146 | 0.9414 |
| Listeria_monocytogenes_serotype_1_2a_str_08-6056_1196182 | Listeria_monocytogenes_1639_v146 | 0.9414 |
| Listeria_monocytogenes_serotype_1_2a_str_04-5457_1196181 | Listeria_monocytogenes_1639_v146 | 0.9464 |
| Listeria_monocytogenes_serotype_1_2a_str_02-5993_1196180 | Listeria_monocytogenes_1639_v146 | 0.9461 |
| Listeria_monocytogenes_R479a_1437838                     | Listeria_monocytogenes_1639_v146 | 0.945  |
| Listeria_monocytogenes_N53-1_1234142                     | Listeria_monocytogenes_1639_v146 | 0.9185 |
| Listeria_monocytogenes_M7_1030009                        | Listeria_monocytogenes_1639_v146 | 0.9089 |
| Listeria_monocytogenes_LO28_393132                       | Listeria_monocytogenes_1639_v146 | 0.9553 |
| Listeria_monocytogenes_L99_563174                        | Listeria_monocytogenes_1639_v146 | 0.9095 |
| Listeria_monocytogenes_L312_882094                       | Listeria_monocytogenes_1639_v146 | 0.9566 |
| Listeria_monocytogenes_J1816_930781                      | Listeria_monocytogenes_1639_v146 | 0.9303 |
| Listeria_monocytogenes_J1-220_930782                     | Listeria_monocytogenes_1639_v146 | 0.9275 |
| Listeria_monocytogenes_J0161_393130                      | Listeria_monocytogenes_1639_v146 | 0.9583 |
| Listeria_monocytogenes_HCC23_552536                      | Listeria_monocytogenes_1639_v146 | 0.9092 |
| Listeria_monocytogenes_FSL_R2-561_393126                 | Listeria_monocytogenes_1639_v146 | 0.9552 |
| Listeria_monocytogenes_FSL_J1-208_393119                 | Listeria_monocytogenes_1639_v146 | 0.9162 |
| Listeria_monocytogenes_FSL_J1-175_393118                 | Listeria_monocytogenes_1639_v146 | 0.9547 |
| Listeria_monocytogenes_Finland_1998_393127               | Listeria_monocytogenes_1639_v146 | 0.9712 |
| Listeria_monocytogenes_EGD-e_169963_v1                   | Listeria_monocytogenes_1639_v146 | 0.9655 |



|                                                          |                                  |        |
|----------------------------------------------------------|----------------------------------|--------|
| Listeria_monocytogenes_1639_v22                          | Listeria_monocytogenes_1639_v146 | 0.9402 |
| Listeria_monocytogenes_1639_v21                          | Listeria_monocytogenes_1639_v146 | 0.9279 |
| Listeria_monocytogenes_1639_v20                          | Listeria_monocytogenes_1639_v146 | 0.9338 |
| Listeria_monocytogenes_1639_v1                           | Listeria_monocytogenes_1639_v146 | 0.9351 |
| Listeria_monocytogenes_1639_v19                          | Listeria_monocytogenes_1639_v146 | 0.9335 |
| Listeria_monocytogenes_1639_v198                         | Listeria_monocytogenes_1639_v146 | 0.9214 |
| Listeria_monocytogenes_1639_v197                         | Listeria_monocytogenes_1639_v146 | 0.9515 |
| Listeria_monocytogenes_1639_v196                         | Listeria_monocytogenes_1639_v146 | 0.9457 |
| Listeria_monocytogenes_1639_v195                         | Listeria_monocytogenes_1639_v146 | 0.9541 |
| Listeria_monocytogenes_1639_v194                         | Listeria_monocytogenes_1639_v146 | 0.9522 |
| Listeria_monocytogenes_1639_v193                         | Listeria_monocytogenes_1639_v146 | 0.9526 |
| Listeria_monocytogenes_1639_v192                         | Listeria_monocytogenes_1639_v146 | 0.9114 |
| Listeria_monocytogenes_1639_v191                         | Listeria_monocytogenes_1639_v146 | 0.9766 |
| Listeria_monocytogenes_1639_v190                         | Listeria_monocytogenes_1639_v146 | 0.9755 |
| Listeria_monocytogenes_1639_v18                          | Listeria_monocytogenes_1639_v146 | 0.9213 |
| Listeria_monocytogenes_1639_v189                         | Listeria_monocytogenes_1639_v146 | 0.9747 |
| Listeria_monocytogenes_1639_v188                         | Listeria_monocytogenes_1639_v146 | 0.9793 |
| Listeria_monocytogenes_1639_v187                         | Listeria_monocytogenes_1639_v146 | 0.9751 |
| Listeria_monocytogenes_1639_v186                         | Listeria_monocytogenes_1639_v146 | 0.9758 |
| Listeria_monocytogenes_1639_v185                         | Listeria_monocytogenes_1639_v146 | 0.9755 |
| Listeria_monocytogenes_1639_v184                         | Listeria_monocytogenes_1639_v146 | 0.9751 |
| Listeria_monocytogenes_1639_v183                         | Listeria_monocytogenes_1639_v146 | 0.9762 |
| Listeria_monocytogenes_1639_v182                         | Listeria_monocytogenes_1639_v146 | 0.9785 |
| Listeria_monocytogenes_1639_v181                         | Listeria_monocytogenes_1639_v146 | 0.9329 |
| Listeria_monocytogenes_1639_v180                         | Listeria_monocytogenes_1639_v146 | 0.9329 |
| Listeria_monocytogenes_1639_v17                          | Listeria_monocytogenes_1639_v146 | 0.9213 |
| Listeria_monocytogenes_1639_v179                         | Listeria_monocytogenes_1639_v146 | 0.9618 |
| Listeria_monocytogenes_1639_v178                         | Listeria_monocytogenes_1639_v146 | 0.9797 |
| Listeria_monocytogenes_1639_v177                         | Listeria_monocytogenes_1639_v146 | 0.949  |
| Listeria_monocytogenes_1639_v176                         | Listeria_monocytogenes_1639_v146 | 0.9504 |
| Listeria_monocytogenes_1639_v175                         | Listeria_monocytogenes_1639_v146 | 0.9649 |
| Listeria_monocytogenes_1639_v174                         | Listeria_monocytogenes_1639_v146 | 0.9739 |
| Listeria_monocytogenes_1639_v173                         | Listeria_monocytogenes_1639_v146 | 0.9673 |
| Listeria_monocytogenes_1639_v172                         | Listeria_monocytogenes_1639_v146 | 0.9501 |
| Listeria_monocytogenes_1639_v171                         | Listeria_monocytogenes_1639_v146 | 0.9598 |
| Listeria_monocytogenes_1639_v170                         | Listeria_monocytogenes_1639_v146 | 0.9679 |
| Listeria_monocytogenes_1639_v16                          | Listeria_monocytogenes_1639_v146 | 0.932  |
| Listeria_monocytogenes_1639_v169                         | Listeria_monocytogenes_1639_v146 | 0.9695 |
| Listeria_monocytogenes_1639_v168                         | Listeria_monocytogenes_1639_v146 | 0.9693 |
| Listeria_monocytogenes_1639_v167                         | Listeria_monocytogenes_1639_v146 | 0.9648 |
| Listeria_monocytogenes_1639_v166                         | Listeria_monocytogenes_1639_v146 | 0.9697 |
| Listeria_monocytogenes_1639_v165                         | Listeria_monocytogenes_1639_v146 | 0.9691 |
| Listeria_monocytogenes_1639_v164                         | Listeria_monocytogenes_1639_v146 | 0.9523 |
| Listeria_monocytogenes_1639_v163                         | Listeria_monocytogenes_1639_v146 | 0.9582 |
| Listeria_monocytogenes_1639_v162                         | Listeria_monocytogenes_1639_v146 | 0.9523 |
| Listeria_monocytogenes_1639_v161                         | Listeria_monocytogenes_1639_v146 | 0.9535 |
| Listeria_monocytogenes_1639_v160                         | Listeria_monocytogenes_1639_v146 | 0.9535 |
| Listeria_monocytogenes_1639_v15                          | Listeria_monocytogenes_1639_v146 | 0.9234 |
| Listeria_monocytogenes_1639_v159                         | Listeria_monocytogenes_1639_v146 | 0.9494 |
| Listeria_monocytogenes_1639_v158                         | Listeria_monocytogenes_1639_v146 | 0.9532 |
| Listeria_monocytogenes_1639_v157                         | Listeria_monocytogenes_1639_v146 | 0.9532 |
| Listeria_monocytogenes_1639_v156                         | Listeria_monocytogenes_1639_v146 | 0.9517 |
| Listeria_monocytogenes_1639_v155                         | Listeria_monocytogenes_1639_v146 | 0.9669 |
| Listeria_monocytogenes_1639_v154                         | Listeria_monocytogenes_1639_v146 | 0.9653 |
| Listeria_monocytogenes_1639_v153                         | Listeria_monocytogenes_1639_v146 | 0.9676 |
| Listeria_monocytogenes_1639_v152                         | Listeria_monocytogenes_1639_v146 | 0.9497 |
| Listeria_monocytogenes_1639_v151                         | Listeria_monocytogenes_1639_v146 | 0.9497 |
| Listeria_monocytogenes_1639_v150                         | Listeria_monocytogenes_1639_v146 | 0.9642 |
| Listeria_monocytogenes_1639_v14                          | Listeria_monocytogenes_1639_v146 | 0.9303 |
| Listeria_monocytogenes_1639_v149                         | Listeria_monocytogenes_1639_v146 | 0.9627 |
| Listeria_monocytogenes_1639_v148                         | Listeria_monocytogenes_1639_v146 | 0.9486 |
| Listeria_monocytogenes_1639_v147                         | Listeria_monocytogenes_1639_v146 | 0.935  |
| Listeria_monocytogenes_1639_v146                         | Listeria_monocytogenes_1639_v146 | 0.0664 |
| Listeria_welshimeri_1643                                 | Listeria_monocytogenes_1639_v147 | 0.8686 |
| Listeria_welshimeri_serovar_6b_str_SLCC5334_386043       | Listeria_monocytogenes_1639_v147 | 0.8683 |
| Listeria_seeligeri_serovar_1_2b_str_SLCC3954_683837      | Listeria_monocytogenes_1639_v147 | 0.8764 |
| Listeria_seeligeri_FSL_S4-171_702452                     | Listeria_monocytogenes_1639_v147 | 0.8174 |
| Listeria_seeligeri_FSL_N1-067_702453                     | Listeria_monocytogenes_1639_v147 | 0.8469 |
| Listeria_seeligeri_1640_v1                               | Listeria_monocytogenes_1639_v147 | 0.8867 |
| Listeria_seeligeri_1640                                  | Listeria_monocytogenes_1639_v147 | 0.8766 |
| Listeria_monocytogenes_WSLC1042_1457188                  | Listeria_monocytogenes_1639_v147 | 0.9537 |
| Listeria_monocytogenes_WSLC1001_1457187                  | Listeria_monocytogenes_1639_v147 | 0.9217 |
| Listeria_monocytogenes_SLCC7179_879090                   | Listeria_monocytogenes_1639_v147 | 0.927  |
| Listeria_monocytogenes_SLCC5850_882096                   | Listeria_monocytogenes_1639_v147 | 0.9262 |
| Listeria_monocytogenes_SLCC2755_932919                   | Listeria_monocytogenes_1639_v147 | 0.9391 |
| Listeria_monocytogenes_SLCC2540_879089                   | Listeria_monocytogenes_1639_v147 | 0.9363 |
| Listeria_monocytogenes_SLCC2479_882020                   | Listeria_monocytogenes_1639_v147 | 0.9188 |
| Listeria_monocytogenes_SLCC2378_879088                   | Listeria_monocytogenes_1639_v147 | 0.9548 |
| Listeria_monocytogenes_SLCC2376_882097                   | Listeria_monocytogenes_1639_v147 | 0.9333 |
| Listeria_monocytogenes_SLCC2372_932920                   | Listeria_monocytogenes_1639_v147 | 0.9139 |
| Listeria_monocytogenes_serotype_4b_str_LL195_1230340     | Listeria_monocytogenes_1639_v147 | 0.9602 |
| Listeria_monocytogenes_serotype_4b_str_LIS0087_1134669   | Listeria_monocytogenes_1639_v147 | 0.9035 |
| Listeria_monocytogenes_serotype_4b_str_F2365_265669      | Listeria_monocytogenes_1639_v147 | 0.9602 |
| Listeria_monocytogenes_serotype_4b_str_CLIP_80459_568819 | Listeria_monocytogenes_1639_v147 | 0.9617 |
| Listeria_monocytogenes_serotype_4b_str_81-0861_1196161   | Listeria_monocytogenes_1639_v147 | 0.9441 |
| Listeria_monocytogenes_serotype_4b_str_81-0592_1196160   | Listeria_monocytogenes_1639_v147 | 0.9452 |
| Listeria_monocytogenes_serotype_4b_str_81-0558_1196159   | Listeria_monocytogenes_1639_v147 | 0.9448 |
| Listeria_monocytogenes_serotype_4b_str_10-0809_1196162   | Listeria_monocytogenes_1639_v147 | 0.9455 |
| Listeria_monocytogenes_serotype_4b_str_02-6680_1196175   | Listeria_monocytogenes_1639_v147 | 0.9591 |
| Listeria_monocytogenes_serotype_4b_str_02-6679_1196174   | Listeria_monocytogenes_1639_v147 | 0.9591 |
| Listeria_monocytogenes_serotype_4b_str_02-1792_1196173   | Listeria_monocytogenes_1639_v147 | 0.9452 |

|                                                          |                                  |        |
|----------------------------------------------------------|----------------------------------|--------|
| Listeria_monocytogenes_serotype_4b_str_02-1289_1196172   | Listeria_monocytogenes_1639_v147 | 0.9452 |
| Listeria_monocytogenes_serotype_4b_str_02-1103_1196171   | Listeria_monocytogenes_1639_v147 | 0.9452 |
| Listeria_monocytogenes_serotype_3c_str_10-5027_1196195   | Listeria_monocytogenes_1639_v147 | 0.9181 |
| Listeria_monocytogenes_serotype_1_2c_str_10-5026_1196194 | Listeria_monocytogenes_1639_v147 | 0.9188 |
| Listeria_monocytogenes_serotype_1_2c_str_10-5025_1196193 | Listeria_monocytogenes_1639_v147 | 0.9188 |
| Listeria_monocytogenes_serotype_1_2b_str_10-0811_1196164 | Listeria_monocytogenes_1639_v147 | 0.9307 |
| Listeria_monocytogenes_serotype_1_2b_str_10-0810_1196163 | Listeria_monocytogenes_1639_v147 | 0.9307 |
| Listeria_monocytogenes_serotype_1_2a_str_99-6370_1196179 | Listeria_monocytogenes_1639_v147 | 0.9085 |
| Listeria_monocytogenes_serotype_1_2a_str_98-2035_1196178 | Listeria_monocytogenes_1639_v147 | 0.9085 |
| Listeria_monocytogenes_serotype_1_2a_str_95-0093_1196177 | Listeria_monocytogenes_1639_v147 | 0.9135 |
| Listeria_monocytogenes_serotype_1_2a_str_88-0478_1196176 | Listeria_monocytogenes_1639_v147 | 0.9123 |
| Listeria_monocytogenes_serotype_1_2a_str_10-5024_1196192 | Listeria_monocytogenes_1639_v147 | 0.9135 |
| Listeria_monocytogenes_serotype_1_2a_str_10-4758_1196168 | Listeria_monocytogenes_1639_v147 | 0.9274 |
| Listeria_monocytogenes_serotype_1_2a_str_10-4754_1196167 | Listeria_monocytogenes_1639_v147 | 0.9274 |
| Listeria_monocytogenes_serotype_1_2a_str_10-1321_1196191 | Listeria_monocytogenes_1639_v147 | 0.9135 |
| Listeria_monocytogenes_serotype_1_2a_str_10-1047_1196190 | Listeria_monocytogenes_1639_v147 | 0.9141 |
| Listeria_monocytogenes_serotype_1_2a_str_10-1046_1196189 | Listeria_monocytogenes_1639_v147 | 0.9141 |
| Listeria_monocytogenes_serotype_1_2a_str_10-0934_1196170 | Listeria_monocytogenes_1639_v147 | 0.9371 |
| Listeria_monocytogenes_serotype_1_2a_str_10-0933_1196169 | Listeria_monocytogenes_1639_v147 | 0.9371 |
| Listeria_monocytogenes_serotype_1_2a_str_10-0815_1196188 | Listeria_monocytogenes_1639_v147 | 0.9098 |
| Listeria_monocytogenes_serotype_1_2a_str_10-0814_1196187 | Listeria_monocytogenes_1639_v147 | 0.9138 |
| Listeria_monocytogenes_serotype_1_2a_str_10-0813_1196166 | Listeria_monocytogenes_1639_v147 | 0.9193 |
| Listeria_monocytogenes_serotype_1_2a_str_10-0812_1196165 | Listeria_monocytogenes_1639_v147 | 0.9193 |
| Listeria_monocytogenes_serotype_1_2a_str_08-7669_1196186 | Listeria_monocytogenes_1639_v147 | 0.9226 |
| Listeria_monocytogenes_serotype_1_2a_str_08-7374_1196185 | Listeria_monocytogenes_1639_v147 | 0.9135 |
| Listeria_monocytogenes_serotype_1_2a_str_08-6997_1196184 | Listeria_monocytogenes_1639_v147 | 0.9098 |
| Listeria_monocytogenes_serotype_1_2a_str_08-6569_1196183 | Listeria_monocytogenes_1639_v147 | 0.9098 |
| Listeria_monocytogenes_serotype_1_2a_str_08-6056_1196182 | Listeria_monocytogenes_1639_v147 | 0.9098 |
| Listeria_monocytogenes_serotype_1_2a_str_04-5457_1196181 | Listeria_monocytogenes_1639_v147 | 0.9135 |
| Listeria_monocytogenes_serotype_1_2a_str_02-5993_1196180 | Listeria_monocytogenes_1639_v147 | 0.9135 |
| Listeria_monocytogenes_R479a_1437838                     | Listeria_monocytogenes_1639_v147 | 0.9202 |
| Listeria_monocytogenes_N53-1_1234142                     | Listeria_monocytogenes_1639_v147 | 0.8838 |
| Listeria_monocytogenes_M7_1030009                        | Listeria_monocytogenes_1639_v147 | 0.8984 |
| Listeria_monocytogenes_LO28_393132                       | Listeria_monocytogenes_1639_v147 | 0.9175 |
| Listeria_monocytogenes_L99_563174                        | Listeria_monocytogenes_1639_v147 | 0.8988 |
| Listeria_monocytogenes_L312_882094                       | Listeria_monocytogenes_1639_v147 | 0.962  |
| Listeria_monocytogenes_J1816_930781                      | Listeria_monocytogenes_1639_v147 | 0.9629 |
| Listeria_monocytogenes_J1-220_930782                     | Listeria_monocytogenes_1639_v147 | 0.9367 |
| Listeria_monocytogenes_J0161_393130                      | Listeria_monocytogenes_1639_v147 | 0.9164 |
| Listeria_monocytogenes_HCC23_552536                      | Listeria_monocytogenes_1639_v147 | 0.8981 |
| Listeria_monocytogenes_FSL_R2-561_393126                 | Listeria_monocytogenes_1639_v147 | 0.9174 |
| Listeria_monocytogenes_FSL_J1-208_393119                 | Listeria_monocytogenes_1639_v147 | 0.9084 |
| Listeria_monocytogenes_FSL_J1-175_393118                 | Listeria_monocytogenes_1639_v147 | 0.9424 |
| Listeria_monocytogenes_Finland_1998_393127               | Listeria_monocytogenes_1639_v147 | 0.9375 |
| Listeria_monocytogenes_EGD-e_169963_v1                   | Listeria_monocytogenes_1639_v147 | 0.9264 |
| Listeria_monocytogenes_EGD-e_169963                      | Listeria_monocytogenes_1639_v147 | 0.9268 |
| Listeria_monocytogenes_EGD_1334565                       | Listeria_monocytogenes_1639_v147 | 0.9269 |
| Listeria_monocytogenes_CFSAN002349_1299895               | Listeria_monocytogenes_1639_v147 | 0.9678 |
| Listeria_monocytogenes_ATCC_19117_882095_v1              | Listeria_monocytogenes_1639_v147 | 0.9562 |
| Listeria_monocytogenes_ATCC_19117_882095                 | Listeria_monocytogenes_1639_v147 | 0.9558 |
| Listeria_monocytogenes_6179_1288295                      | Listeria_monocytogenes_1639_v147 | 0.9076 |
| Listeria_monocytogenes_1639_v9                           | Listeria_monocytogenes_1639_v147 | 0.9141 |
| Listeria_monocytogenes_1639_v99                          | Listeria_monocytogenes_1639_v147 | 0.9681 |
| Listeria_monocytogenes_1639_v98                          | Listeria_monocytogenes_1639_v147 | 0.9151 |
| Listeria_monocytogenes_1639_v97                          | Listeria_monocytogenes_1639_v147 | 0.9525 |
| Listeria_monocytogenes_1639_v96                          | Listeria_monocytogenes_1639_v147 | 0.9677 |
| Listeria_monocytogenes_1639_v95                          | Listeria_monocytogenes_1639_v147 | 0.9674 |
| Listeria_monocytogenes_1639_v94                          | Listeria_monocytogenes_1639_v147 | 0.9677 |
| Listeria_monocytogenes_1639_v93                          | Listeria_monocytogenes_1639_v147 | 0.9208 |
| Listeria_monocytogenes_1639_v92                          | Listeria_monocytogenes_1639_v147 | 0.9677 |
| Listeria_monocytogenes_1639_v91                          | Listeria_monocytogenes_1639_v147 | 0.9409 |
| Listeria_monocytogenes_1639_v90                          | Listeria_monocytogenes_1639_v147 | 0.9151 |
| Listeria_monocytogenes_1639_v8                           | Listeria_monocytogenes_1639_v147 | 0.9109 |
| Listeria_monocytogenes_1639_v89                          | Listeria_monocytogenes_1639_v147 | 0.9523 |
| Listeria_monocytogenes_1639_v88                          | Listeria_monocytogenes_1639_v147 | 0.9183 |
| Listeria_monocytogenes_1639_v87                          | Listeria_monocytogenes_1639_v147 | 0.9152 |
| Listeria_monocytogenes_1639_v86                          | Listeria_monocytogenes_1639_v147 | 0.9149 |
| Listeria_monocytogenes_1639_v85                          | Listeria_monocytogenes_1639_v147 | 0.943  |
| Listeria_monocytogenes_1639_v84                          | Listeria_monocytogenes_1639_v147 | 0.9214 |
| Listeria_monocytogenes_1639_v83                          | Listeria_monocytogenes_1639_v147 | 0.9451 |
| Listeria_monocytogenes_1639_v82                          | Listeria_monocytogenes_1639_v147 | 0.9444 |
| Listeria_monocytogenes_1639_v81                          | Listeria_monocytogenes_1639_v147 | 0.9183 |
| Listeria_monocytogenes_1639_v80                          | Listeria_monocytogenes_1639_v147 | 0.936  |
| Listeria_monocytogenes_1639_v7                           | Listeria_monocytogenes_1639_v147 | 0.9109 |
| Listeria_monocytogenes_1639_v79                          | Listeria_monocytogenes_1639_v147 | 0.9165 |
| Listeria_monocytogenes_1639_v78                          | Listeria_monocytogenes_1639_v147 | 0.9176 |
| Listeria_monocytogenes_1639_v77                          | Listeria_monocytogenes_1639_v147 | 0.9184 |
| Listeria_monocytogenes_1639_v76                          | Listeria_monocytogenes_1639_v147 | 0.9122 |
| Listeria_monocytogenes_1639_v75                          | Listeria_monocytogenes_1639_v147 | 0.8988 |
| Listeria_monocytogenes_1639_v74                          | Listeria_monocytogenes_1639_v147 | 0.9439 |
| Listeria_monocytogenes_1639_v73                          | Listeria_monocytogenes_1639_v147 | 0.9153 |
| Listeria_monocytogenes_1639_v72                          | Listeria_monocytogenes_1639_v147 | 0.9436 |
| Listeria_monocytogenes_1639_v71                          | Listeria_monocytogenes_1639_v147 | 0.931  |
| Listeria_monocytogenes_1639_v70                          | Listeria_monocytogenes_1639_v147 | 0.9162 |
| Listeria_monocytogenes_1639_v6                           | Listeria_monocytogenes_1639_v147 | 0.9105 |
| Listeria_monocytogenes_1639_v69                          | Listeria_monocytogenes_1639_v147 | 0.9452 |
| Listeria_monocytogenes_1639_v68                          | Listeria_monocytogenes_1639_v147 | 0.9216 |
| Listeria_monocytogenes_1639_v67                          | Listeria_monocytogenes_1639_v147 | 0.9317 |
| Listeria_monocytogenes_1639_v66                          | Listeria_monocytogenes_1639_v147 | 0.923  |
| Listeria_monocytogenes_1639_v65                          | Listeria_monocytogenes_1639_v147 | 0.9154 |
| Listeria_monocytogenes_1639_v64                          | Listeria_monocytogenes_1639_v147 | 0.9158 |







[illegible]

|                                                          |                                  |        |
|----------------------------------------------------------|----------------------------------|--------|
| Listeria_monocytogenes_1639_v20                          | Listeria_monocytogenes_1639_v148 | 0.9372 |
| Listeria_monocytogenes_1639_v1                           | Listeria_monocytogenes_1639_v148 | 0.9082 |
| Listeria_monocytogenes_1639_v19                          | Listeria_monocytogenes_1639_v148 | 0.9368 |
| Listeria_monocytogenes_1639_v198                         | Listeria_monocytogenes_1639_v148 | 0.8977 |
| Listeria_monocytogenes_1639_v197                         | Listeria_monocytogenes_1639_v148 | 0.9273 |
| Listeria_monocytogenes_1639_v196                         | Listeria_monocytogenes_1639_v148 | 0.9238 |
| Listeria_monocytogenes_1639_v195                         | Listeria_monocytogenes_1639_v148 | 0.9481 |
| Listeria_monocytogenes_1639_v194                         | Listeria_monocytogenes_1639_v148 | 0.9475 |
| Listeria_monocytogenes_1639_v193                         | Listeria_monocytogenes_1639_v148 | 0.9475 |
| Listeria_monocytogenes_1639_v192                         | Listeria_monocytogenes_1639_v148 | 0.9103 |
| Listeria_monocytogenes_1639_v191                         | Listeria_monocytogenes_1639_v148 | 0.9519 |
| Listeria_monocytogenes_1639_v190                         | Listeria_monocytogenes_1639_v148 | 0.9531 |
| Listeria_monocytogenes_1639_v18                          | Listeria_monocytogenes_1639_v148 | 0.968  |
| Listeria_monocytogenes_1639_v189                         | Listeria_monocytogenes_1639_v148 | 0.952  |
| Listeria_monocytogenes_1639_v188                         | Listeria_monocytogenes_1639_v148 | 0.9527 |
| Listeria_monocytogenes_1639_v187                         | Listeria_monocytogenes_1639_v148 | 0.9531 |
| Listeria_monocytogenes_1639_v186                         | Listeria_monocytogenes_1639_v148 | 0.9531 |
| Listeria_monocytogenes_1639_v185                         | Listeria_monocytogenes_1639_v148 | 0.9535 |
| Listeria_monocytogenes_1639_v184                         | Listeria_monocytogenes_1639_v148 | 0.9523 |
| Listeria_monocytogenes_1639_v183                         | Listeria_monocytogenes_1639_v148 | 0.9458 |
| Listeria_monocytogenes_1639_v182                         | Listeria_monocytogenes_1639_v148 | 0.948  |
| Listeria_monocytogenes_1639_v181                         | Listeria_monocytogenes_1639_v148 | 0.9337 |
| Listeria_monocytogenes_1639_v180                         | Listeria_monocytogenes_1639_v148 | 0.9337 |
| Listeria_monocytogenes_1639_v17                          | Listeria_monocytogenes_1639_v148 | 0.9683 |
| Listeria_monocytogenes_1639_v179                         | Listeria_monocytogenes_1639_v148 | 0.9367 |
| Listeria_monocytogenes_1639_v178                         | Listeria_monocytogenes_1639_v148 | 0.9524 |
| Listeria_monocytogenes_1639_v177                         | Listeria_monocytogenes_1639_v148 | 0.9981 |
| Listeria_monocytogenes_1639_v176                         | Listeria_monocytogenes_1639_v148 | 0.9452 |
| Listeria_monocytogenes_1639_v175                         | Listeria_monocytogenes_1639_v148 | 0.9405 |
| Listeria_monocytogenes_1639_v174                         | Listeria_monocytogenes_1639_v148 | 0.9532 |
| Listeria_monocytogenes_1639_v173                         | Listeria_monocytogenes_1639_v148 | 0.9702 |
| Listeria_monocytogenes_1639_v172                         | Listeria_monocytogenes_1639_v148 | 0.9431 |
| Listeria_monocytogenes_1639_v171                         | Listeria_monocytogenes_1639_v148 | 0.9382 |
| Listeria_monocytogenes_1639_v170                         | Listeria_monocytogenes_1639_v148 | 0.9465 |
| Listeria_monocytogenes_1639_v16                          | Listeria_monocytogenes_1639_v148 | 0.9117 |
| Listeria_monocytogenes_1639_v169                         | Listeria_monocytogenes_1639_v148 | 0.9451 |
| Listeria_monocytogenes_1639_v168                         | Listeria_monocytogenes_1639_v148 | 0.9502 |
| Listeria_monocytogenes_1639_v167                         | Listeria_monocytogenes_1639_v148 | 0.9385 |
| Listeria_monocytogenes_1639_v166                         | Listeria_monocytogenes_1639_v148 | 0.9505 |
| Listeria_monocytogenes_1639_v165                         | Listeria_monocytogenes_1639_v148 | 0.9447 |
| Listeria_monocytogenes_1639_v164                         | Listeria_monocytogenes_1639_v148 | 0.9738 |
| Listeria_monocytogenes_1639_v163                         | Listeria_monocytogenes_1639_v148 | 0.9634 |
| Listeria_monocytogenes_1639_v162                         | Listeria_monocytogenes_1639_v148 | 0.9738 |
| Listeria_monocytogenes_1639_v161                         | Listeria_monocytogenes_1639_v148 | 0.9742 |
| Listeria_monocytogenes_1639_v160                         | Listeria_monocytogenes_1639_v148 | 0.9738 |
| Listeria_monocytogenes_1639_v15                          | Listeria_monocytogenes_1639_v148 | 0.9297 |
| Listeria_monocytogenes_1639_v159                         | Listeria_monocytogenes_1639_v148 | 0.9985 |
| Listeria_monocytogenes_1639_v158                         | Listeria_monocytogenes_1639_v148 | 0.9742 |
| Listeria_monocytogenes_1639_v157                         | Listeria_monocytogenes_1639_v148 | 0.9742 |
| Listeria_monocytogenes_1639_v156                         | Listeria_monocytogenes_1639_v148 | 0.9297 |
| Listeria_monocytogenes_1639_v155                         | Listeria_monocytogenes_1639_v148 | 0.9406 |
| Listeria_monocytogenes_1639_v154                         | Listeria_monocytogenes_1639_v148 | 0.9441 |
| Listeria_monocytogenes_1639_v153                         | Listeria_monocytogenes_1639_v148 | 0.9414 |
| Listeria_monocytogenes_1639_v152                         | Listeria_monocytogenes_1639_v148 | 0.9985 |
| Listeria_monocytogenes_1639_v151                         | Listeria_monocytogenes_1639_v148 | 0.9985 |
| Listeria_monocytogenes_1639_v150                         | Listeria_monocytogenes_1639_v148 | 0.9425 |
| Listeria_monocytogenes_1639_v14                          | Listeria_monocytogenes_1639_v148 | 0.9366 |
| Listeria_monocytogenes_1639_v149                         | Listeria_monocytogenes_1639_v148 | 0.9415 |
| Listeria_monocytogenes_1639_v148                         | Listeria_monocytogenes_1639_v148 | 0.0649 |
| Listeria_welshimeri_1643                                 | Listeria_monocytogenes_1639_v149 | 0.8807 |
| Listeria_welshimeri_serovar_6b_str_SLCC5334_386043       | Listeria_monocytogenes_1639_v149 | 0.8803 |
| Listeria_seeligeri_serovar_1_2b_str_SLCC3954_683837      | Listeria_monocytogenes_1639_v149 | 0.8844 |
| Listeria_seeligeri_FSL_S4-171_702452                     | Listeria_monocytogenes_1639_v149 | 0.819  |
| Listeria_seeligeri_FSL_N1-067_702453                     | Listeria_monocytogenes_1639_v149 | 0.8346 |
| Listeria_seeligeri_1640_v1                               | Listeria_monocytogenes_1639_v149 | 0.8824 |
| Listeria_seeligeri_1640                                  | Listeria_monocytogenes_1639_v149 | 0.8772 |
| Listeria_monocytogenes_WSLC1042_1457188                  | Listeria_monocytogenes_1639_v149 | 0.93   |
| Listeria_monocytogenes_WSLC1001_1457187                  | Listeria_monocytogenes_1639_v149 | 0.9936 |
| Listeria_monocytogenes_SLCC7179_879090                   | Listeria_monocytogenes_1639_v149 | 0.9595 |
| Listeria_monocytogenes_SLCC5850_882096                   | Listeria_monocytogenes_1639_v149 | 0.9989 |
| Listeria_monocytogenes_SLCC2755_932919                   | Listeria_monocytogenes_1639_v149 | 0.9347 |
| Listeria_monocytogenes_SLCC2540_879089                   | Listeria_monocytogenes_1639_v149 | 0.9481 |
| Listeria_monocytogenes_SLCC2479_882020                   | Listeria_monocytogenes_1639_v149 | 0.9556 |
| Listeria_monocytogenes_SLCC2378_879088                   | Listeria_monocytogenes_1639_v149 | 0.9311 |
| Listeria_monocytogenes_SLCC2376_882097                   | Listeria_monocytogenes_1639_v149 | 0.9438 |
| Listeria_monocytogenes_SLCC2372_932920                   | Listeria_monocytogenes_1639_v149 | 0.9481 |
| Listeria_monocytogenes_serotype_4b_str_LL195_1230340     | Listeria_monocytogenes_1639_v149 | 0.9371 |
| Listeria_monocytogenes_serotype_4b_str_LIS0087_1134669   | Listeria_monocytogenes_1639_v149 | 0.9647 |
| Listeria_monocytogenes_serotype_4b_str_F2365_265669      | Listeria_monocytogenes_1639_v149 | 0.9371 |
| Listeria_monocytogenes_serotype_4b_str_CLIP_80459_568819 | Listeria_monocytogenes_1639_v149 | 0.944  |
| Listeria_monocytogenes_serotype_4b_str_81-0861_1196161   | Listeria_monocytogenes_1639_v149 | 0.9228 |
| Listeria_monocytogenes_serotype_4b_str_81-0592_1196160   | Listeria_monocytogenes_1639_v149 | 0.9239 |
| Listeria_monocytogenes_serotype_4b_str_81-0558_1196159   | Listeria_monocytogenes_1639_v149 | 0.9246 |
| Listeria_monocytogenes_serotype_4b_str_10-0809_1196162   | Listeria_monocytogenes_1639_v149 | 0.9242 |
| Listeria_monocytogenes_serotype_4b_str_02-6680_1196175   | Listeria_monocytogenes_1639_v149 | 0.9426 |
| Listeria_monocytogenes_serotype_4b_str_02-6679_1196174   | Listeria_monocytogenes_1639_v149 | 0.9426 |
| Listeria_monocytogenes_serotype_4b_str_02-1792_1196173   | Listeria_monocytogenes_1639_v149 | 0.9239 |
| Listeria_monocytogenes_serotype_4b_str_02-1289_1196172   | Listeria_monocytogenes_1639_v149 | 0.9239 |
| Listeria_monocytogenes_serotype_4b_str_02-1103_1196171   | Listeria_monocytogenes_1639_v149 | 0.9239 |
| Listeria_monocytogenes_serotype_3c_str_10-5027_1196195   | Listeria_monocytogenes_1639_v149 | 0.9567 |
| Listeria_monocytogenes_serotype_1_2c_str_10-5026_1196194 | Listeria_monocytogenes_1639_v149 | 0.9571 |

|                                                          |                                  |        |
|----------------------------------------------------------|----------------------------------|--------|
| Listeria_monocytogenes_serotype_1_2c_str_10-5025_1196193 | Listeria_monocytogenes_1639_v149 | 0.9571 |
| Listeria_monocytogenes_serotype_1_2b_str_10-0811_1196164 | Listeria_monocytogenes_1639_v149 | 0.9401 |
| Listeria_monocytogenes_serotype_1_2b_str_10-0810_1196163 | Listeria_monocytogenes_1639_v149 | 0.9401 |
| Listeria_monocytogenes_serotype_1_2a_str_99-6370_1196179 | Listeria_monocytogenes_1639_v149 | 0.948  |
| Listeria_monocytogenes_serotype_1_2a_str_98-2035_1196178 | Listeria_monocytogenes_1639_v149 | 0.948  |
| Listeria_monocytogenes_serotype_1_2a_str_95-0093_1196177 | Listeria_monocytogenes_1639_v149 | 0.9525 |
| Listeria_monocytogenes_serotype_1_2a_str_88-0478_1196176 | Listeria_monocytogenes_1639_v149 | 0.9525 |
| Listeria_monocytogenes_serotype_1_2a_str_10-5024_1196192 | Listeria_monocytogenes_1639_v149 | 0.9529 |
| Listeria_monocytogenes_serotype_1_2a_str_10-4758_1196168 | Listeria_monocytogenes_1639_v149 | 0.9681 |
| Listeria_monocytogenes_serotype_1_2a_str_10-4754_1196167 | Listeria_monocytogenes_1639_v149 | 0.9685 |
| Listeria_monocytogenes_serotype_1_2a_str_10-1321_1196191 | Listeria_monocytogenes_1639_v149 | 0.9529 |
| Listeria_monocytogenes_serotype_1_2a_str_10-1047_1196190 | Listeria_monocytogenes_1639_v149 | 0.9536 |
| Listeria_monocytogenes_serotype_1_2a_str_10-1046_1196189 | Listeria_monocytogenes_1639_v149 | 0.9536 |
| Listeria_monocytogenes_serotype_1_2a_str_10-0934_1196170 | Listeria_monocytogenes_1639_v149 | 0.9738 |
| Listeria_monocytogenes_serotype_1_2a_str_10-0933_1196169 | Listeria_monocytogenes_1639_v149 | 0.9738 |
| Listeria_monocytogenes_serotype_1_2a_str_10-0815_1196188 | Listeria_monocytogenes_1639_v149 | 0.9491 |
| Listeria_monocytogenes_serotype_1_2a_str_10-0814_1196187 | Listeria_monocytogenes_1639_v149 | 0.9529 |
| Listeria_monocytogenes_serotype_1_2a_str_10-0813_1196166 | Listeria_monocytogenes_1639_v149 | 0.9796 |
| Listeria_monocytogenes_serotype_1_2a_str_10-0812_1196165 | Listeria_monocytogenes_1639_v149 | 0.9796 |
| Listeria_monocytogenes_serotype_1_2a_str_08-7669_1196186 | Listeria_monocytogenes_1639_v149 | 0.9513 |
| Listeria_monocytogenes_serotype_1_2a_str_08-7374_1196185 | Listeria_monocytogenes_1639_v149 | 0.9529 |
| Listeria_monocytogenes_serotype_1_2a_str_08-6997_1196184 | Listeria_monocytogenes_1639_v149 | 0.9491 |
| Listeria_monocytogenes_serotype_1_2a_str_08-6569_1196183 | Listeria_monocytogenes_1639_v149 | 0.9491 |
| Listeria_monocytogenes_serotype_1_2a_str_08-6056_1196182 | Listeria_monocytogenes_1639_v149 | 0.9491 |
| Listeria_monocytogenes_serotype_1_2a_str_04-5457_1196181 | Listeria_monocytogenes_1639_v149 | 0.9529 |
| Listeria_monocytogenes_serotype_1_2a_str_02-5993_1196180 | Listeria_monocytogenes_1639_v149 | 0.9529 |
| Listeria_monocytogenes_R479a_1437838                     | Listeria_monocytogenes_1639_v149 | 0.9507 |
| Listeria_monocytogenes_N53-1_1234142                     | Listeria_monocytogenes_1639_v149 | 0.9087 |
| Listeria_monocytogenes_M7_1030009                        | Listeria_monocytogenes_1639_v149 | 0.9138 |
| Listeria_monocytogenes_LO28_393132                       | Listeria_monocytogenes_1639_v149 | 0.9542 |
| Listeria_monocytogenes_L99_563174                        | Listeria_monocytogenes_1639_v149 | 0.9141 |
| Listeria_monocytogenes_L312_882094                       | Listeria_monocytogenes_1639_v149 | 0.944  |
| Listeria_monocytogenes_J1816_930781                      | Listeria_monocytogenes_1639_v149 | 0.9253 |
| Listeria_monocytogenes_J1-220_930782                     | Listeria_monocytogenes_1639_v149 | 0.9282 |
| Listeria_monocytogenes_J0161_393130                      | Listeria_monocytogenes_1639_v149 | 0.9455 |
| Listeria_monocytogenes_HCC23_552536                      | Listeria_monocytogenes_1639_v149 | 0.9138 |
| Listeria_monocytogenes_FSL_R2-561_393126                 | Listeria_monocytogenes_1639_v149 | 0.9553 |
| Listeria_monocytogenes_FSL_J1-208_393119                 | Listeria_monocytogenes_1639_v149 | 0.9086 |
| Listeria_monocytogenes_FSL_J1-175_393118                 | Listeria_monocytogenes_1639_v149 | 0.9521 |
| Listeria_monocytogenes_Finland_1998_393127               | Listeria_monocytogenes_1639_v149 | 0.9619 |
| Listeria_monocytogenes_EGD-e_169963_v1                   | Listeria_monocytogenes_1639_v149 | 0.9541 |
| Listeria_monocytogenes_EGD-e_169963                      | Listeria_monocytogenes_1639_v149 | 0.9541 |
| Listeria_monocytogenes_EGD_1334565                       | Listeria_monocytogenes_1639_v149 | 0.9996 |
| Listeria_monocytogenes_CFSAN002349_1299895               | Listeria_monocytogenes_1639_v149 | 0.9422 |
| Listeria_monocytogenes_ATCC_19117_882095_v1              | Listeria_monocytogenes_1639_v149 | 0.9374 |
| Listeria_monocytogenes_ATCC_19117_882095                 | Listeria_monocytogenes_1639_v149 | 0.937  |
| Listeria_monocytogenes_6179_1288295                      | Listeria_monocytogenes_1639_v149 | 0.9441 |
| Listeria_monocytogenes_1639_v9                           | Listeria_monocytogenes_1639_v149 | 0.925  |
| Listeria_monocytogenes_1639_v99                          | Listeria_monocytogenes_1639_v149 | 0.9276 |
| Listeria_monocytogenes_1639_v98                          | Listeria_monocytogenes_1639_v149 | 0.9466 |
| Listeria_monocytogenes_1639_v97                          | Listeria_monocytogenes_1639_v149 | 0.933  |
| Listeria_monocytogenes_1639_v96                          | Listeria_monocytogenes_1639_v149 | 0.925  |
| Listeria_monocytogenes_1639_v95                          | Listeria_monocytogenes_1639_v149 | 0.925  |
| Listeria_monocytogenes_1639_v94                          | Listeria_monocytogenes_1639_v149 | 0.9257 |
| Listeria_monocytogenes_1639_v93                          | Listeria_monocytogenes_1639_v149 | 0.9518 |
| Listeria_monocytogenes_1639_v92                          | Listeria_monocytogenes_1639_v149 | 0.9269 |
| Listeria_monocytogenes_1639_v91                          | Listeria_monocytogenes_1639_v149 | 0.9301 |
| Listeria_monocytogenes_1639_v90                          | Listeria_monocytogenes_1639_v149 | 0.9466 |
| Listeria_monocytogenes_1639_v8                           | Listeria_monocytogenes_1639_v149 | 0.9398 |
| Listeria_monocytogenes_1639_v89                          | Listeria_monocytogenes_1639_v149 | 0.9381 |
| Listeria_monocytogenes_1639_v88                          | Listeria_monocytogenes_1639_v149 | 0.9664 |
| Listeria_monocytogenes_1639_v87                          | Listeria_monocytogenes_1639_v149 | 0.9767 |
| Listeria_monocytogenes_1639_v86                          | Listeria_monocytogenes_1639_v149 | 0.9763 |
| Listeria_monocytogenes_1639_v85                          | Listeria_monocytogenes_1639_v149 | 0.9225 |
| Listeria_monocytogenes_1639_v84                          | Listeria_monocytogenes_1639_v149 | 0.9618 |
| Listeria_monocytogenes_1639_v83                          | Listeria_monocytogenes_1639_v149 | 0.9287 |
| Listeria_monocytogenes_1639_v82                          | Listeria_monocytogenes_1639_v149 | 0.9283 |
| Listeria_monocytogenes_1639_v81                          | Listeria_monocytogenes_1639_v149 | 0.9562 |
| Listeria_monocytogenes_1639_v80                          | Listeria_monocytogenes_1639_v149 | 0.9444 |
| Listeria_monocytogenes_1639_v7                           | Listeria_monocytogenes_1639_v149 | 0.9398 |
| Listeria_monocytogenes_1639_v79                          | Listeria_monocytogenes_1639_v149 | 0.9529 |
| Listeria_monocytogenes_1639_v78                          | Listeria_monocytogenes_1639_v149 | 0.9555 |
| Listeria_monocytogenes_1639_v77                          | Listeria_monocytogenes_1639_v149 | 0.9489 |
| Listeria_monocytogenes_1639_v76                          | Listeria_monocytogenes_1639_v149 | 0.9536 |
| Listeria_monocytogenes_1639_v75                          | Listeria_monocytogenes_1639_v149 | 0.9141 |
| Listeria_monocytogenes_1639_v74                          | Listeria_monocytogenes_1639_v149 | 0.9609 |
| Listeria_monocytogenes_1639_v73                          | Listeria_monocytogenes_1639_v149 | 0.9507 |
| Listeria_monocytogenes_1639_v72                          | Listeria_monocytogenes_1639_v149 | 0.9271 |
| Listeria_monocytogenes_1639_v71                          | Listeria_monocytogenes_1639_v149 | 0.9463 |
| Listeria_monocytogenes_1639_v70                          | Listeria_monocytogenes_1639_v149 | 0.9532 |
| Listeria_monocytogenes_1639_v6                           | Listeria_monocytogenes_1639_v149 | 0.9395 |
| Listeria_monocytogenes_1639_v69                          | Listeria_monocytogenes_1639_v149 | 0.9239 |
| Listeria_monocytogenes_1639_v68                          | Listeria_monocytogenes_1639_v149 | 0.9464 |
| Listeria_monocytogenes_1639_v67                          | Listeria_monocytogenes_1639_v149 | 0.9419 |
| Listeria_monocytogenes_1639_v66                          | Listeria_monocytogenes_1639_v149 | 0.9666 |
| Listeria_monocytogenes_1639_v65                          | Listeria_monocytogenes_1639_v149 | 0.955  |
| Listeria_monocytogenes_1639_v64                          | Listeria_monocytogenes_1639_v149 | 0.9593 |
| Listeria_monocytogenes_1639_v63                          | Listeria_monocytogenes_1639_v149 | 0.9407 |
| Listeria_monocytogenes_1639_v62                          | Listeria_monocytogenes_1639_v149 | 0.9512 |
| Listeria_monocytogenes_1639_v61                          | Listeria_monocytogenes_1639_v149 | 0.9554 |
| Listeria_monocytogenes_1639_v60                          | Listeria_monocytogenes_1639_v149 | 0.9487 |

[illegible]



[illegible]



Listeria\_monocytogenes\_1639\_v195  
Listeria\_monocytogenes\_1639\_v194  
Listeria\_monocytogenes\_1639\_v193  
Listeria\_monocytogenes\_1639\_v192  
Listeria\_monocytogenes\_1639\_v191  
Listeria\_monocytogenes\_1639\_v190  
Listeria\_monocytogenes\_1639\_v18  
Listeria\_monocytogenes\_1639\_v189  
Listeria\_monocytogenes\_1639\_v188  
Listeria\_monocytogenes\_1639\_v187  
Listeria\_monocytogenes\_1639\_v186  
Listeria\_monocytogenes\_1639\_v185  
Listeria\_monocytogenes\_1639\_v184  
Listeria\_monocytogenes\_1639\_v183  
Listeria\_monocytogenes\_1639\_v182  
Listeria\_monocytogenes\_1639\_v181  
Listeria\_monocytogenes\_1639\_v180  
Listeria\_monocytogenes\_1639\_v17  
Listeria\_monocytogenes\_1639\_v179  
Listeria\_monocytogenes\_1639\_v178  
Listeria\_monocytogenes\_1639\_v177  
Listeria\_monocytogenes\_1639\_v176  
Listeria\_monocytogenes\_1639\_v175  
Listeria\_monocytogenes\_1639\_v174  
Listeria\_monocytogenes\_1639\_v173  
Listeria\_monocytogenes\_1639\_v172  
Listeria\_monocytogenes\_1639\_v171  
Listeria\_monocytogenes\_1639\_v170  
Listeria\_monocytogenes\_1639\_v16  
Listeria\_monocytogenes\_1639\_v169  
Listeria\_monocytogenes\_1639\_v168  
Listeria\_monocytogenes\_1639\_v167  
Listeria\_monocytogenes\_1639\_v166  
Listeria\_monocytogenes\_1639\_v165  
Listeria\_monocytogenes\_1639\_v164  
Listeria\_monocytogenes\_1639\_v163  
Listeria\_monocytogenes\_1639\_v162  
Listeria\_monocytogenes\_1639\_v161  
Listeria\_monocytogenes\_1639\_v160  
Listeria\_monocytogenes\_1639\_v15  
Listeria\_monocytogenes\_1639\_v159  
Listeria\_monocytogenes\_1639\_v158  
Listeria\_monocytogenes\_1639\_v157  
Listeria\_monocytogenes\_1639\_v156  
Listeria\_monocytogenes\_1639\_v155  
Listeria\_monocytogenes\_1639\_v154  
Listeria\_monocytogenes\_1639\_v153  
Listeria\_monocytogenes\_1639\_v152  
Listeria\_monocytogenes\_1639\_v151  
Listeria\_monocytogenes\_1639\_v150  
Listeria\_monocytogenes\_1639\_v14  
Listeria\_welshimeri\_1643  
Listeria\_welshimeri\_serovar\_6b\_str\_SLCC5334\_386043  
Listeria\_seeligeri\_serovar\_1\_2b\_str\_SLCC3954\_683837  
Listeria\_seeligeri\_FSL\_S4-171\_702452  
Listeria\_seeligeri\_FSL\_N1-067\_702453  
Listeria\_seeligeri\_1640\_v1  
Listeria\_seeligeri\_1640  
Listeria\_monocytogenes\_WSLC1042\_1457188  
Listeria\_monocytogenes\_WSLC1001\_1457187  
Listeria\_monocytogenes\_SLCC7179\_879090  
Listeria\_monocytogenes\_SLCC5850\_882096  
Listeria\_monocytogenes\_SLCC2755\_932919  
Listeria\_monocytogenes\_SLCC2540\_879089  
Listeria\_monocytogenes\_SLCC2479\_882020  
Listeria\_monocytogenes\_SLCC2378\_879088  
Listeria\_monocytogenes\_SLCC2376\_882097  
Listeria\_monocytogenes\_SLCC2372\_932920  
Listeria\_monocytogenes\_serotype\_4b\_str\_LL195\_1230340  
Listeria\_monocytogenes\_serotype\_4b\_str\_LIS0087\_1134669  
Listeria\_monocytogenes\_serotype\_4b\_str\_F2365\_265669  
Listeria\_monocytogenes\_serotype\_4b\_str\_CLIP\_80459\_568819  
Listeria\_monocytogenes\_serotype\_4b\_str\_81-0861\_1196161  
Listeria\_monocytogenes\_serotype\_4b\_str\_81-0592\_1196160  
Listeria\_monocytogenes\_serotype\_4b\_str\_81-0558\_1196159  
Listeria\_monocytogenes\_serotype\_4b\_str\_10-0809\_1196162  
Listeria\_monocytogenes\_serotype\_4b\_str\_02-6680\_1196175  
Listeria\_monocytogenes\_serotype\_4b\_str\_02-6679\_1196174  
Listeria\_monocytogenes\_serotype\_4b\_str\_02-1792\_1196173  
Listeria\_monocytogenes\_serotype\_4b\_str\_02-1289\_1196171  
Listeria\_monocytogenes\_serotype\_4b\_str\_02-1103\_1196172  
Listeria\_monocytogenes\_serotype\_3c\_str\_10-5027\_1196195  
Listeria\_monocytogenes\_serotype\_1\_2c\_str\_10-5026\_1196194  
Listeria\_monocytogenes\_serotype\_1\_2c\_str\_10-5025\_1196193  
Listeria\_monocytogenes\_serotype\_1\_2b\_str\_10-0811\_1196164  
Listeria\_monocytogenes\_serotype\_1\_2b\_str\_10-0810\_1196163  
Listeria\_monocytogenes\_serotype\_1\_2a\_str\_99-6370\_1196179  
Listeria\_monocytogenes\_serotype\_1\_2a\_str\_98-2035\_1196178  
Listeria\_monocytogenes\_serotype\_1\_2a\_str\_95-0093\_1196177  
Listeria\_monocytogenes\_serotype\_1\_2a\_str\_88-0478\_1196176  
Listeria\_monocytogenes\_serotype\_1\_2a\_str\_10-5024\_1196192

Listeria\_monocytogenes\_1639\_v14 0.9194  
Listeria\_monocytogenes\_1639\_v14 0.9195  
Listeria\_monocytogenes\_1639\_v14 0.9195  
Listeria\_monocytogenes\_1639\_v14 0.8843  
Listeria\_monocytogenes\_1639\_v14 0.9259  
Listeria\_monocytogenes\_1639\_v14 0.9274  
Listeria\_monocytogenes\_1639\_v14 0.9261  
Listeria\_monocytogenes\_1639\_v14 0.9263  
Listeria\_monocytogenes\_1639\_v14 0.9284  
Listeria\_monocytogenes\_1639\_v14 0.9271  
Listeria\_monocytogenes\_1639\_v14 0.9274  
Listeria\_monocytogenes\_1639\_v14 0.9274  
Listeria\_monocytogenes\_1639\_v14 0.9267  
Listeria\_monocytogenes\_1639\_v14 0.9214  
Listeria\_monocytogenes\_1639\_v14 0.9235  
Listeria\_monocytogenes\_1639\_v14 0.9003  
Listeria\_monocytogenes\_1639\_v14 0.9003  
Listeria\_monocytogenes\_1639\_v14 0.9261  
Listeria\_monocytogenes\_1639\_v14 0.9151  
Listeria\_monocytogenes\_1639\_v14 0.9271  
Listeria\_monocytogenes\_1639\_v14 0.9373  
Listeria\_monocytogenes\_1639\_v14 0.9151  
Listeria\_monocytogenes\_1639\_v14 0.921  
Listeria\_monocytogenes\_1639\_v14 0.9268  
Listeria\_monocytogenes\_1639\_v14 0.9429  
Listeria\_monocytogenes\_1639\_v14 0.9141  
Listeria\_monocytogenes\_1639\_v14 0.9286  
Listeria\_monocytogenes\_1639\_v14 0.9324  
Listeria\_monocytogenes\_1639\_v14 0.9127  
Listeria\_monocytogenes\_1639\_v14 0.9236  
Listeria\_monocytogenes\_1639\_v14 0.9205  
Listeria\_monocytogenes\_1639\_v14 0.9182  
Listeria\_monocytogenes\_1639\_v14 0.9209  
Listeria\_monocytogenes\_1639\_v14 0.9232  
Listeria\_monocytogenes\_1639\_v14 0.936  
Listeria\_monocytogenes\_1639\_v14 0.941  
Listeria\_monocytogenes\_1639\_v14 0.936  
Listeria\_monocytogenes\_1639\_v14 0.9361  
Listeria\_monocytogenes\_1639\_v14 0.9361  
Listeria\_monocytogenes\_1639\_v14 0.945  
Listeria\_monocytogenes\_1639\_v14 0.9373  
Listeria\_monocytogenes\_1639\_v14 0.9368  
Listeria\_monocytogenes\_1639\_v14 0.9368  
Listeria\_monocytogenes\_1639\_v14 0.9251  
Listeria\_monocytogenes\_1639\_v14 0.9256  
Listeria\_monocytogenes\_1639\_v14 0.9249  
Listeria\_monocytogenes\_1639\_v14 0.9326  
Listeria\_monocytogenes\_1639\_v14 0.9377  
Listeria\_monocytogenes\_1639\_v14 0.9377  
Listeria\_monocytogenes\_1639\_v14 0.92  
Listeria\_monocytogenes\_1639\_v14 0.0757  
Listeria\_monocytogenes\_1639\_v150 0.8777  
Listeria\_monocytogenes\_1639\_v150 0.8774  
Listeria\_monocytogenes\_1639\_v150 0.8856  
Listeria\_monocytogenes\_1639\_v150 0.8193  
Listeria\_monocytogenes\_1639\_v150 0.8327  
Listeria\_monocytogenes\_1639\_v150 0.8837  
Listeria\_monocytogenes\_1639\_v150 0.8765  
Listeria\_monocytogenes\_1639\_v150 0.931  
Listeria\_monocytogenes\_1639\_v150 0.9879  
Listeria\_monocytogenes\_1639\_v150 0.9605  
Listeria\_monocytogenes\_1639\_v150 0.9882  
Listeria\_monocytogenes\_1639\_v150 0.9361  
Listeria\_monocytogenes\_1639\_v150 0.948  
Listeria\_monocytogenes\_1639\_v150 0.9593  
Listeria\_monocytogenes\_1639\_v150 0.9321  
Listeria\_monocytogenes\_1639\_v150 0.9452  
Listeria\_monocytogenes\_1639\_v150 0.9521  
Listeria\_monocytogenes\_1639\_v150 0.9381  
Listeria\_monocytogenes\_1639\_v150 0.9727  
Listeria\_monocytogenes\_1639\_v150 0.9381  
Listeria\_monocytogenes\_1639\_v150 0.945  
Listeria\_monocytogenes\_1639\_v150 0.923  
Listeria\_monocytogenes\_1639\_v150 0.9241  
Listeria\_monocytogenes\_1639\_v150 0.9244  
Listeria\_monocytogenes\_1639\_v150 0.9241  
Listeria\_monocytogenes\_1639\_v150 0.9436  
Listeria\_monocytogenes\_1639\_v150 0.9436  
Listeria\_monocytogenes\_1639\_v150 0.9241  
Listeria\_monocytogenes\_1639\_v150 0.9241  
Listeria\_monocytogenes\_1639\_v150 0.9241  
Listeria\_monocytogenes\_1639\_v150 0.9559  
Listeria\_monocytogenes\_1639\_v150 0.957  
Listeria\_monocytogenes\_1639\_v150 0.957  
Listeria\_monocytogenes\_1639\_v150 0.9384  
Listeria\_monocytogenes\_1639\_v150 0.9384  
Listeria\_monocytogenes\_1639\_v150 0.9468  
Listeria\_monocytogenes\_1639\_v150 0.9468  
Listeria\_monocytogenes\_1639\_v150 0.9521  
Listeria\_monocytogenes\_1639\_v150 0.9513  
Listeria\_monocytogenes\_1639\_v150 0.9524

|                                                          |                                  |        |
|----------------------------------------------------------|----------------------------------|--------|
| Listeria_monocytogenes_serotype_1_2a_str_10-4758_1196168 | Listeria_monocytogenes_1639_v150 | 0.9692 |
| Listeria_monocytogenes_serotype_1_2a_str_10-4754_1196167 | Listeria_monocytogenes_1639_v150 | 0.9695 |
| Listeria_monocytogenes_serotype_1_2a_str_10-1321_1196191 | Listeria_monocytogenes_1639_v150 | 0.9524 |
| Listeria_monocytogenes_serotype_1_2a_str_10-1047_1196190 | Listeria_monocytogenes_1639_v150 | 0.9528 |
| Listeria_monocytogenes_serotype_1_2a_str_10-1046_1196189 | Listeria_monocytogenes_1639_v150 | 0.9528 |
| Listeria_monocytogenes_serotype_1_2a_str_10-0934_1196170 | Listeria_monocytogenes_1639_v150 | 0.9757 |
| Listeria_monocytogenes_serotype_1_2a_str_10-0933_1196169 | Listeria_monocytogenes_1639_v150 | 0.9757 |
| Listeria_monocytogenes_serotype_1_2a_str_10-0815_1196188 | Listeria_monocytogenes_1639_v150 | 0.9482 |
| Listeria_monocytogenes_serotype_1_2a_str_10-0814_1196187 | Listeria_monocytogenes_1639_v150 | 0.9524 |
| Listeria_monocytogenes_serotype_1_2a_str_10-0813_1196166 | Listeria_monocytogenes_1639_v150 | 0.9796 |
| Listeria_monocytogenes_serotype_1_2a_str_10-0812_1196165 | Listeria_monocytogenes_1639_v150 | 0.9796 |
| Listeria_monocytogenes_serotype_1_2a_str_08-7669_1196186 | Listeria_monocytogenes_1639_v150 | 0.9519 |
| Listeria_monocytogenes_serotype_1_2a_str_08-7374_1196185 | Listeria_monocytogenes_1639_v150 | 0.9524 |
| Listeria_monocytogenes_serotype_1_2a_str_08-6997_1196184 | Listeria_monocytogenes_1639_v150 | 0.9482 |
| Listeria_monocytogenes_serotype_1_2a_str_08-6569_1196183 | Listeria_monocytogenes_1639_v150 | 0.9482 |
| Listeria_monocytogenes_serotype_1_2a_str_08-6056_1196182 | Listeria_monocytogenes_1639_v150 | 0.9482 |
| Listeria_monocytogenes_serotype_1_2a_str_04-5457_1196181 | Listeria_monocytogenes_1639_v150 | 0.9524 |
| Listeria_monocytogenes_serotype_1_2a_str_02-5993_1196180 | Listeria_monocytogenes_1639_v150 | 0.9524 |
| Listeria_monocytogenes_R479a_1437838                     | Listeria_monocytogenes_1639_v150 | 0.951  |
| Listeria_monocytogenes_N53-1_1234142                     | Listeria_monocytogenes_1639_v150 | 0.9092 |
| Listeria_monocytogenes_M7_1030009                        | Listeria_monocytogenes_1639_v150 | 0.9117 |
| Listeria_monocytogenes_LO28_393132                       | Listeria_monocytogenes_1639_v150 | 0.9582 |
| Listeria_monocytogenes_L99_563174                        | Listeria_monocytogenes_1639_v150 | 0.9121 |
| Listeria_monocytogenes_L312_882094                       | Listeria_monocytogenes_1639_v150 | 0.945  |
| Listeria_monocytogenes_J1816_930781                      | Listeria_monocytogenes_1639_v150 | 0.9255 |
| Listeria_monocytogenes_J1-220_930782                     | Listeria_monocytogenes_1639_v150 | 0.9258 |
| Listeria_monocytogenes_J0161_393130                      | Listeria_monocytogenes_1639_v150 | 0.9469 |
| Listeria_monocytogenes_HCC23_552536                      | Listeria_monocytogenes_1639_v150 | 0.9117 |
| Listeria_monocytogenes_FSL_R2-561_393126                 | Listeria_monocytogenes_1639_v150 | 0.9548 |
| Listeria_monocytogenes_FSL_J1-208_393119                 | Listeria_monocytogenes_1639_v150 | 0.9103 |
| Listeria_monocytogenes_FSL_J1-175_393118                 | Listeria_monocytogenes_1639_v150 | 0.9516 |
| Listeria_monocytogenes_Finland_1998_393127               | Listeria_monocytogenes_1639_v150 | 0.9633 |
| Listeria_monocytogenes_EGD-e_169963_v1                   | Listeria_monocytogenes_1639_v150 | 0.9547 |
| Listeria_monocytogenes_EGD-e_169963                      | Listeria_monocytogenes_1639_v150 | 0.9547 |
| Listeria_monocytogenes_EGD_1334565                       | Listeria_monocytogenes_1639_v150 | 0.9889 |
| Listeria_monocytogenes_CFSAN002349_1299895               | Listeria_monocytogenes_1639_v150 | 0.9436 |
| Listeria_monocytogenes_ATCC_19117_882095_v1              | Listeria_monocytogenes_1639_v150 | 0.9387 |
| Listeria_monocytogenes_ATCC_19117_882095                 | Listeria_monocytogenes_1639_v150 | 0.9384 |
| Listeria_monocytogenes_6179_1288295                      | Listeria_monocytogenes_1639_v150 | 0.9421 |
| Listeria_monocytogenes_1639_v9                           | Listeria_monocytogenes_1639_v150 | 0.9245 |
| Listeria_monocytogenes_1639_v99                          | Listeria_monocytogenes_1639_v150 | 0.9274 |
| Listeria_monocytogenes_1639_v98                          | Listeria_monocytogenes_1639_v150 | 0.9469 |
| Listeria_monocytogenes_1639_v97                          | Listeria_monocytogenes_1639_v150 | 0.9329 |
| Listeria_monocytogenes_1639_v96                          | Listeria_monocytogenes_1639_v150 | 0.9252 |
| Listeria_monocytogenes_1639_v95                          | Listeria_monocytogenes_1639_v150 | 0.9252 |
| Listeria_monocytogenes_1639_v94                          | Listeria_monocytogenes_1639_v150 | 0.9259 |
| Listeria_monocytogenes_1639_v93                          | Listeria_monocytogenes_1639_v150 | 0.9513 |
| Listeria_monocytogenes_1639_v92                          | Listeria_monocytogenes_1639_v150 | 0.9267 |
| Listeria_monocytogenes_1639_v91                          | Listeria_monocytogenes_1639_v150 | 0.9269 |
| Listeria_monocytogenes_1639_v90                          | Listeria_monocytogenes_1639_v150 | 0.9469 |
| Listeria_monocytogenes_1639_v8                           | Listeria_monocytogenes_1639_v150 | 0.9397 |
| Listeria_monocytogenes_1639_v89                          | Listeria_monocytogenes_1639_v150 | 0.9383 |
| Listeria_monocytogenes_1639_v88                          | Listeria_monocytogenes_1639_v150 | 0.9709 |
| Listeria_monocytogenes_1639_v87                          | Listeria_monocytogenes_1639_v150 | 0.9767 |
| Listeria_monocytogenes_1639_v86                          | Listeria_monocytogenes_1639_v150 | 0.9767 |
| Listeria_monocytogenes_1639_v85                          | Listeria_monocytogenes_1639_v150 | 0.9219 |
| Listeria_monocytogenes_1639_v84                          | Listeria_monocytogenes_1639_v150 | 0.9648 |
| Listeria_monocytogenes_1639_v83                          | Listeria_monocytogenes_1639_v150 | 0.9292 |
| Listeria_monocytogenes_1639_v82                          | Listeria_monocytogenes_1639_v150 | 0.9289 |
| Listeria_monocytogenes_1639_v81                          | Listeria_monocytogenes_1639_v150 | 0.9558 |
| Listeria_monocytogenes_1639_v80                          | Listeria_monocytogenes_1639_v150 | 0.9443 |
| Listeria_monocytogenes_1639_v7                           | Listeria_monocytogenes_1639_v150 | 0.9397 |
| Listeria_monocytogenes_1639_v79                          | Listeria_monocytogenes_1639_v150 | 0.9566 |
| Listeria_monocytogenes_1639_v78                          | Listeria_monocytogenes_1639_v150 | 0.9547 |
| Listeria_monocytogenes_1639_v77                          | Listeria_monocytogenes_1639_v150 | 0.9492 |
| Listeria_monocytogenes_1639_v76                          | Listeria_monocytogenes_1639_v150 | 0.9535 |
| Listeria_monocytogenes_1639_v75                          | Listeria_monocytogenes_1639_v150 | 0.9121 |
| Listeria_monocytogenes_1639_v74                          | Listeria_monocytogenes_1639_v150 | 0.9631 |
| Listeria_monocytogenes_1639_v73                          | Listeria_monocytogenes_1639_v150 | 0.9506 |
| Listeria_monocytogenes_1639_v72                          | Listeria_monocytogenes_1639_v150 | 0.9273 |
| Listeria_monocytogenes_1639_v71                          | Listeria_monocytogenes_1639_v150 | 0.9447 |
| Listeria_monocytogenes_1639_v70                          | Listeria_monocytogenes_1639_v150 | 0.9531 |
| Listeria_monocytogenes_1639_v6                           | Listeria_monocytogenes_1639_v150 | 0.9393 |
| Listeria_monocytogenes_1639_v69                          | Listeria_monocytogenes_1639_v150 | 0.9241 |
| Listeria_monocytogenes_1639_v68                          | Listeria_monocytogenes_1639_v150 | 0.9474 |
| Listeria_monocytogenes_1639_v67                          | Listeria_monocytogenes_1639_v150 | 0.9456 |
| Listeria_monocytogenes_1639_v66                          | Listeria_monocytogenes_1639_v150 | 0.9646 |
| Listeria_monocytogenes_1639_v65                          | Listeria_monocytogenes_1639_v150 | 0.9527 |
| Listeria_monocytogenes_1639_v64                          | Listeria_monocytogenes_1639_v150 | 0.9577 |
| Listeria_monocytogenes_1639_v63                          | Listeria_monocytogenes_1639_v150 | 0.9402 |
| Listeria_monocytogenes_1639_v62                          | Listeria_monocytogenes_1639_v150 | 0.9503 |
| Listeria_monocytogenes_1639_v61                          | Listeria_monocytogenes_1639_v150 | 0.9538 |
| Listeria_monocytogenes_1639_v60                          | Listeria_monocytogenes_1639_v150 | 0.9486 |
| Listeria_monocytogenes_1639_v5                           | Listeria_monocytogenes_1639_v150 | 0.8963 |
| Listeria_monocytogenes_1639_v59                          | Listeria_monocytogenes_1639_v150 | 0.9353 |
| Listeria_monocytogenes_1639_v58                          | Listeria_monocytogenes_1639_v150 | 0.9288 |
| Listeria_monocytogenes_1639_v57                          | Listeria_monocytogenes_1639_v150 | 0.9233 |
| Listeria_monocytogenes_1639_v56                          | Listeria_monocytogenes_1639_v150 | 0.9296 |
| Listeria_monocytogenes_1639_v55                          | Listeria_monocytogenes_1639_v150 | 0.9198 |
| Listeria_monocytogenes_1639_v54                          | Listeria_monocytogenes_1639_v150 | 0.9245 |
| Listeria_monocytogenes_1639_v53                          | Listeria_monocytogenes_1639_v150 | 0.9467 |

[illegible]



[illegible]





|                                                          |                                  |        |
|----------------------------------------------------------|----------------------------------|--------|
| Listeria_monocytogenes_serotype_1_2a_str_08-7374_1196185 | Listeria_monocytogenes_1639_v152 | 0.9264 |
| Listeria_monocytogenes_serotype_1_2a_str_08-6997_1196184 | Listeria_monocytogenes_1639_v152 | 0.9219 |
| Listeria_monocytogenes_serotype_1_2a_str_08-6569_1196183 | Listeria_monocytogenes_1639_v152 | 0.9219 |
| Listeria_monocytogenes_serotype_1_2a_str_08-6056_1196182 | Listeria_monocytogenes_1639_v152 | 0.9219 |
| Listeria_monocytogenes_serotype_1_2a_str_04-5457_1196181 | Listeria_monocytogenes_1639_v152 | 0.9264 |
| Listeria_monocytogenes_serotype_1_2a_str_02-5993_1196180 | Listeria_monocytogenes_1639_v152 | 0.926  |
| Listeria_monocytogenes_R479a_1437838                     | Listeria_monocytogenes_1639_v152 | 0.9253 |
| Listeria_monocytogenes_N53-1_1234142                     | Listeria_monocytogenes_1639_v152 | 0.8968 |
| Listeria_monocytogenes_M7_1030009                        | Listeria_monocytogenes_1639_v152 | 0.9111 |
| Listeria_monocytogenes_LO28_393132                       | Listeria_monocytogenes_1639_v152 | 0.9313 |
| Listeria_monocytogenes_L99_563174                        | Listeria_monocytogenes_1639_v152 | 0.9118 |
| Listeria_monocytogenes_L312_882094                       | Listeria_monocytogenes_1639_v152 | 0.978  |
| Listeria_monocytogenes_J1816_930781                      | Listeria_monocytogenes_1639_v152 | 0.9777 |
| Listeria_monocytogenes_J1-220_930782                     | Listeria_monocytogenes_1639_v152 | 0.9504 |
| Listeria_monocytogenes_J0161_393130                      | Listeria_monocytogenes_1639_v152 | 0.9305 |
| Listeria_monocytogenes_HCC23_552536                      | Listeria_monocytogenes_1639_v152 | 0.9111 |
| Listeria_monocytogenes_FSL_R2-561_393126                 | Listeria_monocytogenes_1639_v152 | 0.9313 |
| Listeria_monocytogenes_FSL_J1-208_393119                 | Listeria_monocytogenes_1639_v152 | 0.9196 |
| Listeria_monocytogenes_FSL_J1-175_393118                 | Listeria_monocytogenes_1639_v152 | 0.9568 |
| Listeria_monocytogenes_Finland_1998_393127               | Listeria_monocytogenes_1639_v152 | 0.9528 |
| Listeria_monocytogenes_EGD-e_169963_v1                   | Listeria_monocytogenes_1639_v152 | 0.9405 |
| Listeria_monocytogenes_EGD-e_169963                      | Listeria_monocytogenes_1639_v152 | 0.9409 |
| Listeria_monocytogenes_EGD_1334565                       | Listeria_monocytogenes_1639_v152 | 0.9422 |
| Listeria_monocytogenes_CFSAN002349_1299895               | Listeria_monocytogenes_1639_v152 | 0.9827 |
| Listeria_monocytogenes_ATCC_19117_882095_v1              | Listeria_monocytogenes_1639_v152 | 0.9708 |
| Listeria_monocytogenes_ATCC_19117_882095                 | Listeria_monocytogenes_1639_v152 | 0.9708 |
| Listeria_monocytogenes_6179_1288295                      | Listeria_monocytogenes_1639_v152 | 0.9151 |
| Listeria_monocytogenes_1639_v9                           | Listeria_monocytogenes_1639_v152 | 0.9272 |
| Listeria_monocytogenes_1639_v99                          | Listeria_monocytogenes_1639_v152 | 0.98   |
| Listeria_monocytogenes_1639_v98                          | Listeria_monocytogenes_1639_v152 | 0.9293 |
| Listeria_monocytogenes_1639_v97                          | Listeria_monocytogenes_1639_v152 | 0.9673 |
| Listeria_monocytogenes_1639_v96                          | Listeria_monocytogenes_1639_v152 | 0.9789 |
| Listeria_monocytogenes_1639_v95                          | Listeria_monocytogenes_1639_v152 | 0.9789 |
| Listeria_monocytogenes_1639_v94                          | Listeria_monocytogenes_1639_v152 | 0.9793 |
| Listeria_monocytogenes_1639_v93                          | Listeria_monocytogenes_1639_v152 | 0.9278 |
| Listeria_monocytogenes_1639_v92                          | Listeria_monocytogenes_1639_v152 | 0.9796 |
| Listeria_monocytogenes_1639_v91                          | Listeria_monocytogenes_1639_v152 | 0.9558 |
| Listeria_monocytogenes_1639_v90                          | Listeria_monocytogenes_1639_v152 | 0.9293 |
| Listeria_monocytogenes_1639_v8                           | Listeria_monocytogenes_1639_v152 | 0.9154 |
| Listeria_monocytogenes_1639_v89                          | Listeria_monocytogenes_1639_v152 | 0.9672 |
| Listeria_monocytogenes_1639_v88                          | Listeria_monocytogenes_1639_v152 | 0.9325 |
| Listeria_monocytogenes_1639_v87                          | Listeria_monocytogenes_1639_v152 | 0.9301 |
| Listeria_monocytogenes_1639_v86                          | Listeria_monocytogenes_1639_v152 | 0.9294 |
| Listeria_monocytogenes_1639_v85                          | Listeria_monocytogenes_1639_v152 | 0.9573 |
| Listeria_monocytogenes_1639_v84                          | Listeria_monocytogenes_1639_v152 | 0.9361 |
| Listeria_monocytogenes_1639_v83                          | Listeria_monocytogenes_1639_v152 | 0.9594 |
| Listeria_monocytogenes_1639_v82                          | Listeria_monocytogenes_1639_v152 | 0.9587 |
| Listeria_monocytogenes_1639_v81                          | Listeria_monocytogenes_1639_v152 | 0.9333 |
| Listeria_monocytogenes_1639_v80                          | Listeria_monocytogenes_1639_v152 | 0.951  |
| Listeria_monocytogenes_1639_v7                           | Listeria_monocytogenes_1639_v152 | 0.9154 |
| Listeria_monocytogenes_1639_v79                          | Listeria_monocytogenes_1639_v152 | 0.9311 |
| Listeria_monocytogenes_1639_v78                          | Listeria_monocytogenes_1639_v152 | 0.9326 |
| Listeria_monocytogenes_1639_v77                          | Listeria_monocytogenes_1639_v152 | 0.9327 |
| Listeria_monocytogenes_1639_v76                          | Listeria_monocytogenes_1639_v152 | 0.9259 |
| Listeria_monocytogenes_1639_v75                          | Listeria_monocytogenes_1639_v152 | 0.9118 |
| Listeria_monocytogenes_1639_v74                          | Listeria_monocytogenes_1639_v152 | 0.9283 |
| Listeria_monocytogenes_1639_v73                          | Listeria_monocytogenes_1639_v152 | 0.9264 |
| Listeria_monocytogenes_1639_v72                          | Listeria_monocytogenes_1639_v152 | 0.9582 |
| Listeria_monocytogenes_1639_v71                          | Listeria_monocytogenes_1639_v152 | 0.9168 |
| Listeria_monocytogenes_1639_v70                          | Listeria_monocytogenes_1639_v152 | 0.9292 |
| Listeria_monocytogenes_1639_v6                           | Listeria_monocytogenes_1639_v152 | 0.9147 |
| Listeria_monocytogenes_1639_v69                          | Listeria_monocytogenes_1639_v152 | 0.9595 |
| Listeria_monocytogenes_1639_v68                          | Listeria_monocytogenes_1639_v152 | 0.9355 |
| Listeria_monocytogenes_1639_v67                          | Listeria_monocytogenes_1639_v152 | 0.9465 |
| Listeria_monocytogenes_1639_v66                          | Listeria_monocytogenes_1639_v152 | 0.937  |
| Listeria_monocytogenes_1639_v65                          | Listeria_monocytogenes_1639_v152 | 0.9295 |
| Listeria_monocytogenes_1639_v64                          | Listeria_monocytogenes_1639_v152 | 0.9284 |
| Listeria_monocytogenes_1639_v63                          | Listeria_monocytogenes_1639_v152 | 0.9453 |
| Listeria_monocytogenes_1639_v62                          | Listeria_monocytogenes_1639_v152 | 0.9287 |
| Listeria_monocytogenes_1639_v61                          | Listeria_monocytogenes_1639_v152 | 0.9291 |
| Listeria_monocytogenes_1639_v60                          | Listeria_monocytogenes_1639_v152 | 0.9325 |
| Listeria_monocytogenes_1639_v5                           | Listeria_monocytogenes_1639_v152 | 0.9112 |
| Listeria_monocytogenes_1639_v59                          | Listeria_monocytogenes_1639_v152 | 0.9601 |
| Listeria_monocytogenes_1639_v58                          | Listeria_monocytogenes_1639_v152 | 0.9613 |
| Listeria_monocytogenes_1639_v57                          | Listeria_monocytogenes_1639_v152 | 0.9756 |
| Listeria_monocytogenes_1639_v56                          | Listeria_monocytogenes_1639_v152 | 0.9598 |
| Listeria_monocytogenes_1639_v55                          | Listeria_monocytogenes_1639_v152 | 0.9716 |
| Listeria_monocytogenes_1639_v54                          | Listeria_monocytogenes_1639_v152 | 0.927  |
| Listeria_monocytogenes_1639_v53                          | Listeria_monocytogenes_1639_v152 | 0.9325 |
| Listeria_monocytogenes_1639_v52                          | Listeria_monocytogenes_1639_v152 | 0.9565 |
| Listeria_monocytogenes_1639_v51                          | Listeria_monocytogenes_1639_v152 | 0.954  |
| Listeria_monocytogenes_1639_v50                          | Listeria_monocytogenes_1639_v152 | 0.9256 |
| Listeria_monocytogenes_1639_v4                           | Listeria_monocytogenes_1639_v152 | 0.9242 |
| Listeria_monocytogenes_1639_v49                          | Listeria_monocytogenes_1639_v152 | 0.958  |
| Listeria_monocytogenes_1639_v48                          | Listeria_monocytogenes_1639_v152 | 0.9271 |
| Listeria_monocytogenes_1639_v47                          | Listeria_monocytogenes_1639_v152 | 0.926  |
| Listeria_monocytogenes_1639_v46                          | Listeria_monocytogenes_1639_v152 | 0.9348 |
| Listeria_monocytogenes_1639_v45                          | Listeria_monocytogenes_1639_v152 | 0.9168 |
| Listeria_monocytogenes_1639_v44                          | Listeria_monocytogenes_1639_v152 | 0.9264 |
| Listeria_monocytogenes_1639_v43                          | Listeria_monocytogenes_1639_v152 | 0.9264 |
| Listeria_monocytogenes_1639_v42                          | Listeria_monocytogenes_1639_v152 | 0.916  |

[illegible]

|                                                          |                                  |        |
|----------------------------------------------------------|----------------------------------|--------|
| Listeria_monocytogenes_SLCC2378_879088                   | Listeria_monocytogenes_1639_v153 | 0.9328 |
| Listeria_monocytogenes_SLCC2376_882097                   | Listeria_monocytogenes_1639_v153 | 0.9456 |
| Listeria_monocytogenes_SLCC2372_932920                   | Listeria_monocytogenes_1639_v153 | 0.9458 |
| Listeria_monocytogenes_serotype_4b_str_LL195_1230340     | Listeria_monocytogenes_1639_v153 | 0.9389 |
| Listeria_monocytogenes_serotype_4b_str_LIS0087_1134669   | Listeria_monocytogenes_1639_v153 | 0.9411 |
| Listeria_monocytogenes_serotype_4b_str_F2365_265669      | Listeria_monocytogenes_1639_v153 | 0.9389 |
| Listeria_monocytogenes_serotype_4b_str_CLIP_80459_568819 | Listeria_monocytogenes_1639_v153 | 0.9469 |
| Listeria_monocytogenes_serotype_4b_str_81-0861_1196161   | Listeria_monocytogenes_1639_v153 | 0.9351 |
| Listeria_monocytogenes_serotype_4b_str_81-0592_1196160   | Listeria_monocytogenes_1639_v153 | 0.9362 |
| Listeria_monocytogenes_serotype_4b_str_81-0558_1196159   | Listeria_monocytogenes_1639_v153 | 0.9369 |
| Listeria_monocytogenes_serotype_4b_str_10-0809_1196162   | Listeria_monocytogenes_1639_v153 | 0.9362 |
| Listeria_monocytogenes_serotype_4b_str_02-6680_1196175   | Listeria_monocytogenes_1639_v153 | 0.9424 |
| Listeria_monocytogenes_serotype_4b_str_02-6679_1196174   | Listeria_monocytogenes_1639_v153 | 0.9424 |
| Listeria_monocytogenes_serotype_4b_str_02-1792_1196173   | Listeria_monocytogenes_1639_v153 | 0.9369 |
| Listeria_monocytogenes_serotype_4b_str_02-1289_1196172   | Listeria_monocytogenes_1639_v153 | 0.9369 |
| Listeria_monocytogenes_serotype_4b_str_02-1103_1196171   | Listeria_monocytogenes_1639_v153 | 0.9369 |
| Listeria_monocytogenes_serotype_3c_str_10-5027_1196195   | Listeria_monocytogenes_1639_v153 | 0.9528 |
| Listeria_monocytogenes_serotype_1_2c_str_10-5026_1196194 | Listeria_monocytogenes_1639_v153 | 0.954  |
| Listeria_monocytogenes_serotype_1_2c_str_10-5025_1196193 | Listeria_monocytogenes_1639_v153 | 0.954  |
| Listeria_monocytogenes_serotype_1_2b_str_10-0811_1196164 | Listeria_monocytogenes_1639_v153 | 0.9429 |
| Listeria_monocytogenes_serotype_1_2b_str_10-0810_1196163 | Listeria_monocytogenes_1639_v153 | 0.9429 |
| Listeria_monocytogenes_serotype_1_2a_str_99-6370_1196179 | Listeria_monocytogenes_1639_v153 | 0.9371 |
| Listeria_monocytogenes_serotype_1_2a_str_98-2035_1196178 | Listeria_monocytogenes_1639_v153 | 0.9371 |
| Listeria_monocytogenes_serotype_1_2a_str_95-0093_1196177 | Listeria_monocytogenes_1639_v153 | 0.9427 |
| Listeria_monocytogenes_serotype_1_2a_str_88-0478_1196176 | Listeria_monocytogenes_1639_v153 | 0.9419 |
| Listeria_monocytogenes_serotype_1_2a_str_10-5024_1196192 | Listeria_monocytogenes_1639_v153 | 0.943  |
| Listeria_monocytogenes_serotype_1_2a_str_10-4758_1196168 | Listeria_monocytogenes_1639_v153 | 0.9524 |
| Listeria_monocytogenes_serotype_1_2a_str_10-4754_1196167 | Listeria_monocytogenes_1639_v153 | 0.9524 |
| Listeria_monocytogenes_serotype_1_2a_str_10-1321_1196191 | Listeria_monocytogenes_1639_v153 | 0.943  |
| Listeria_monocytogenes_serotype_1_2a_str_10-1047_1196190 | Listeria_monocytogenes_1639_v153 | 0.943  |
| Listeria_monocytogenes_serotype_1_2a_str_10-1046_1196189 | Listeria_monocytogenes_1639_v153 | 0.943  |
| Listeria_monocytogenes_serotype_1_2a_str_10-0934_1196170 | Listeria_monocytogenes_1639_v153 | 0.9629 |
| Listeria_monocytogenes_serotype_1_2a_str_10-0933_1196169 | Listeria_monocytogenes_1639_v153 | 0.9629 |
| Listeria_monocytogenes_serotype_1_2a_str_10-0815_1196188 | Listeria_monocytogenes_1639_v153 | 0.9385 |
| Listeria_monocytogenes_serotype_1_2a_str_10-0814_1196187 | Listeria_monocytogenes_1639_v153 | 0.9427 |
| Listeria_monocytogenes_serotype_1_2a_str_10-0813_1196166 | Listeria_monocytogenes_1639_v153 | 0.9595 |
| Listeria_monocytogenes_serotype_1_2a_str_10-0812_1196165 | Listeria_monocytogenes_1639_v153 | 0.9595 |
| Listeria_monocytogenes_serotype_1_2a_str_08-7669_1196186 | Listeria_monocytogenes_1639_v153 | 0.9519 |
| Listeria_monocytogenes_serotype_1_2a_str_08-7374_1196185 | Listeria_monocytogenes_1639_v153 | 0.943  |
| Listeria_monocytogenes_serotype_1_2a_str_08-6997_1196184 | Listeria_monocytogenes_1639_v153 | 0.9385 |
| Listeria_monocytogenes_serotype_1_2a_str_08-6569_1196183 | Listeria_monocytogenes_1639_v153 | 0.9385 |
| Listeria_monocytogenes_serotype_1_2a_str_08-6056_1196182 | Listeria_monocytogenes_1639_v153 | 0.9385 |
| Listeria_monocytogenes_serotype_1_2a_str_04-5457_1196181 | Listeria_monocytogenes_1639_v153 | 0.943  |
| Listeria_monocytogenes_serotype_1_2a_str_02-5993_1196180 | Listeria_monocytogenes_1639_v153 | 0.9427 |
| Listeria_monocytogenes_R479a_1437838                     | Listeria_monocytogenes_1639_v153 | 0.9412 |
| Listeria_monocytogenes_N53-1_1234142                     | Listeria_monocytogenes_1639_v153 | 0.9158 |
| Listeria_monocytogenes_M7_1030009                        | Listeria_monocytogenes_1639_v153 | 0.9155 |
| Listeria_monocytogenes_LO28_393132                       | Listeria_monocytogenes_1639_v153 | 0.959  |
| Listeria_monocytogenes_L99_563174                        | Listeria_monocytogenes_1639_v153 | 0.9162 |
| Listeria_monocytogenes_L312_882094                       | Listeria_monocytogenes_1639_v153 | 0.9469 |
| Listeria_monocytogenes_J1816_930781                      | Listeria_monocytogenes_1639_v153 | 0.9307 |
| Listeria_monocytogenes_J1-220_930782                     | Listeria_monocytogenes_1639_v153 | 0.9344 |
| Listeria_monocytogenes_J0161_393130                      | Listeria_monocytogenes_1639_v153 | 0.9616 |
| Listeria_monocytogenes_HCC23_552536                      | Listeria_monocytogenes_1639_v153 | 0.9158 |
| Listeria_monocytogenes_FSL_R2-561_393126                 | Listeria_monocytogenes_1639_v153 | 0.951  |
| Listeria_monocytogenes_FSL_J1-208_393119                 | Listeria_monocytogenes_1639_v153 | 0.9088 |
| Listeria_monocytogenes_FSL_J1-175_393118                 | Listeria_monocytogenes_1639_v153 | 0.9367 |
| Listeria_monocytogenes_Finland_1998_393127               | Listeria_monocytogenes_1639_v153 | 0.9629 |
| Listeria_monocytogenes_EGD-e_169963_v1                   | Listeria_monocytogenes_1639_v153 | 0.968  |
| Listeria_monocytogenes_EGD-e_169963                      | Listeria_monocytogenes_1639_v153 | 0.968  |
| Listeria_monocytogenes_EGD_1334565                       | Listeria_monocytogenes_1639_v153 | 0.9542 |
| Listeria_monocytogenes_CFSAN002349_1299895               | Listeria_monocytogenes_1639_v153 | 0.9421 |
| Listeria_monocytogenes_ATCC_19117_882095_v1              | Listeria_monocytogenes_1639_v153 | 0.9387 |
| Listeria_monocytogenes_ATCC_19117_882095                 | Listeria_monocytogenes_1639_v153 | 0.9387 |
| Listeria_monocytogenes_6179_1288295                      | Listeria_monocytogenes_1639_v153 | 0.9428 |
| Listeria_monocytogenes_1639_v9                           | Listeria_monocytogenes_1639_v153 | 0.9226 |
| Listeria_monocytogenes_1639_v99                          | Listeria_monocytogenes_1639_v153 | 0.9327 |
| Listeria_monocytogenes_1639_v98                          | Listeria_monocytogenes_1639_v153 | 0.9774 |
| Listeria_monocytogenes_1639_v97                          | Listeria_monocytogenes_1639_v153 | 0.9382 |
| Listeria_monocytogenes_1639_v96                          | Listeria_monocytogenes_1639_v153 | 0.9312 |
| Listeria_monocytogenes_1639_v95                          | Listeria_monocytogenes_1639_v153 | 0.9312 |
| Listeria_monocytogenes_1639_v94                          | Listeria_monocytogenes_1639_v153 | 0.9316 |
| Listeria_monocytogenes_1639_v93                          | Listeria_monocytogenes_1639_v153 | 0.9367 |
| Listeria_monocytogenes_1639_v92                          | Listeria_monocytogenes_1639_v153 | 0.9319 |
| Listeria_monocytogenes_1639_v91                          | Listeria_monocytogenes_1639_v153 | 0.9337 |
| Listeria_monocytogenes_1639_v90                          | Listeria_monocytogenes_1639_v153 | 0.9774 |
| Listeria_monocytogenes_1639_v8                           | Listeria_monocytogenes_1639_v153 | 0.9289 |
| Listeria_monocytogenes_1639_v89                          | Listeria_monocytogenes_1639_v153 | 0.9463 |
| Listeria_monocytogenes_1639_v88                          | Listeria_monocytogenes_1639_v153 | 0.9516 |
| Listeria_monocytogenes_1639_v87                          | Listeria_monocytogenes_1639_v153 | 0.9563 |
| Listeria_monocytogenes_1639_v86                          | Listeria_monocytogenes_1639_v153 | 0.9563 |
| Listeria_monocytogenes_1639_v85                          | Listeria_monocytogenes_1639_v153 | 0.9351 |
| Listeria_monocytogenes_1639_v84                          | Listeria_monocytogenes_1639_v153 | 0.9545 |
| Listeria_monocytogenes_1639_v83                          | Listeria_monocytogenes_1639_v153 | 0.9402 |
| Listeria_monocytogenes_1639_v82                          | Listeria_monocytogenes_1639_v153 | 0.9399 |
| Listeria_monocytogenes_1639_v81                          | Listeria_monocytogenes_1639_v153 | 0.952  |
| Listeria_monocytogenes_1639_v80                          | Listeria_monocytogenes_1639_v153 | 0.945  |
| Listeria_monocytogenes_1639_v7                           | Listeria_monocytogenes_1639_v153 | 0.9289 |
| Listeria_monocytogenes_1639_v79                          | Listeria_monocytogenes_1639_v153 | 0.9513 |
| Listeria_monocytogenes_1639_v78                          | Listeria_monocytogenes_1639_v153 | 0.9516 |
| Listeria_monocytogenes_1639_v77                          | Listeria_monocytogenes_1639_v153 | 0.9499 |

[illegible]

|                                                          |                                  |        |
|----------------------------------------------------------|----------------------------------|--------|
| Listeria_monocytogenes_1639_v173                         | Listeria_monocytogenes_1639_v153 | 0.951  |
| Listeria_monocytogenes_1639_v172                         | Listeria_monocytogenes_1639_v153 | 0.9397 |
| Listeria_monocytogenes_1639_v171                         | Listeria_monocytogenes_1639_v153 | 0.9521 |
| Listeria_monocytogenes_1639_v170                         | Listeria_monocytogenes_1639_v153 | 0.9601 |
| Listeria_monocytogenes_1639_v16                          | Listeria_monocytogenes_1639_v153 | 0.9292 |
| Listeria_monocytogenes_1639_v169                         | Listeria_monocytogenes_1639_v153 | 0.9567 |
| Listeria_monocytogenes_1639_v168                         | Listeria_monocytogenes_1639_v153 | 0.958  |
| Listeria_monocytogenes_1639_v167                         | Listeria_monocytogenes_1639_v153 | 0.9601 |
| Listeria_monocytogenes_1639_v166                         | Listeria_monocytogenes_1639_v153 | 0.9583 |
| Listeria_monocytogenes_1639_v165                         | Listeria_monocytogenes_1639_v153 | 0.9563 |
| Listeria_monocytogenes_1639_v164                         | Listeria_monocytogenes_1639_v153 | 0.9381 |
| Listeria_monocytogenes_1639_v163                         | Listeria_monocytogenes_1639_v153 | 0.9458 |
| Listeria_monocytogenes_1639_v162                         | Listeria_monocytogenes_1639_v153 | 0.9381 |
| Listeria_monocytogenes_1639_v161                         | Listeria_monocytogenes_1639_v153 | 0.9392 |
| Listeria_monocytogenes_1639_v160                         | Listeria_monocytogenes_1639_v153 | 0.9393 |
| Listeria_monocytogenes_1639_v15                          | Listeria_monocytogenes_1639_v153 | 0.9265 |
| Listeria_monocytogenes_1639_v159                         | Listeria_monocytogenes_1639_v153 | 0.9421 |
| Listeria_monocytogenes_1639_v158                         | Listeria_monocytogenes_1639_v153 | 0.9389 |
| Listeria_monocytogenes_1639_v157                         | Listeria_monocytogenes_1639_v153 | 0.9389 |
| Listeria_monocytogenes_1639_v156                         | Listeria_monocytogenes_1639_v153 | 0.9543 |
| Listeria_monocytogenes_1639_v155                         | Listeria_monocytogenes_1639_v153 | 0.9824 |
| Listeria_monocytogenes_1639_v154                         | Listeria_monocytogenes_1639_v153 | 0.9534 |
| Listeria_monocytogenes_1639_v153                         | Listeria_monocytogenes_1639_v153 | 0.0677 |
| Listeria_welshimeri_1643                                 | Listeria_monocytogenes_1639_v154 | 0.8816 |
| Listeria_welshimeri_serovar_6b_str_SLCC5334_386043       | Listeria_monocytogenes_1639_v154 | 0.881  |
| Listeria_seeligeri_serovar_1_2b_str_SLCC3954_683837      | Listeria_monocytogenes_1639_v154 | 0.8862 |
| Listeria_seeligeri_FSL_S4-171_702452                     | Listeria_monocytogenes_1639_v154 | 0.8183 |
| Listeria_seeligeri_FSL_N1-067_702453                     | Listeria_monocytogenes_1639_v154 | 0.8367 |
| Listeria_seeligeri_1640_v1                               | Listeria_monocytogenes_1639_v154 | 0.8842 |
| Listeria_seeligeri_1640                                  | Listeria_monocytogenes_1639_v154 | 0.8793 |
| Listeria_monocytogenes_WSLC1042_1457188                  | Listeria_monocytogenes_1639_v154 | 0.9345 |
| Listeria_monocytogenes_WSLC1001_1457187                  | Listeria_monocytogenes_1639_v154 | 0.9678 |
| Listeria_monocytogenes_SLCC7179_879090                   | Listeria_monocytogenes_1639_v154 | 0.9625 |
| Listeria_monocytogenes_SLCC5850_882096                   | Listeria_monocytogenes_1639_v154 | 0.9699 |
| Listeria_monocytogenes_SLCC2755_932919                   | Listeria_monocytogenes_1639_v154 | 0.9339 |
| Listeria_monocytogenes_SLCC2540_879089                   | Listeria_monocytogenes_1639_v154 | 0.9507 |
| Listeria_monocytogenes_SLCC2479_882020                   | Listeria_monocytogenes_1639_v154 | 0.9574 |
| Listeria_monocytogenes_SLCC2378_879088                   | Listeria_monocytogenes_1639_v154 | 0.9359 |
| Listeria_monocytogenes_SLCC2376_882097                   | Listeria_monocytogenes_1639_v154 | 0.9406 |
| Listeria_monocytogenes_SLCC2372_932920                   | Listeria_monocytogenes_1639_v154 | 0.9499 |
| Listeria_monocytogenes_serotype_4b_str_LL195_1230340     | Listeria_monocytogenes_1639_v154 | 0.9417 |
| Listeria_monocytogenes_serotype_4b_str_LIS0087_1134669   | Listeria_monocytogenes_1639_v154 | 0.9446 |
| Listeria_monocytogenes_serotype_4b_str_F2365_265669      | Listeria_monocytogenes_1639_v154 | 0.9417 |
| Listeria_monocytogenes_serotype_4b_str_CLIP_80459_568819 | Listeria_monocytogenes_1639_v154 | 0.9485 |
| Listeria_monocytogenes_serotype_4b_str_81-0861_1196161   | Listeria_monocytogenes_1639_v154 | 0.9265 |
| Listeria_monocytogenes_serotype_4b_str_81-0592_1196160   | Listeria_monocytogenes_1639_v154 | 0.9275 |
| Listeria_monocytogenes_serotype_4b_str_81-0558_1196159   | Listeria_monocytogenes_1639_v154 | 0.9282 |
| Listeria_monocytogenes_serotype_4b_str_10-0809_1196162   | Listeria_monocytogenes_1639_v154 | 0.9275 |
| Listeria_monocytogenes_serotype_4b_str_02-6680_1196175   | Listeria_monocytogenes_1639_v154 | 0.9448 |
| Listeria_monocytogenes_serotype_4b_str_02-6679_1196174   | Listeria_monocytogenes_1639_v154 | 0.9448 |
| Listeria_monocytogenes_serotype_4b_str_02-1792_1196173   | Listeria_monocytogenes_1639_v154 | 0.929  |
| Listeria_monocytogenes_serotype_4b_str_02-1289_1196172   | Listeria_monocytogenes_1639_v154 | 0.929  |
| Listeria_monocytogenes_serotype_4b_str_02-1103_1196171   | Listeria_monocytogenes_1639_v154 | 0.929  |
| Listeria_monocytogenes_serotype_3c_str_10-5027_1196195   | Listeria_monocytogenes_1639_v154 | 0.9623 |
| Listeria_monocytogenes_serotype_1_2c_str_10-5026_1196194 | Listeria_monocytogenes_1639_v154 | 0.9623 |
| Listeria_monocytogenes_serotype_1_2c_str_10-5025_1196193 | Listeria_monocytogenes_1639_v154 | 0.9623 |
| Listeria_monocytogenes_serotype_1_2b_str_10-0811_1196164 | Listeria_monocytogenes_1639_v154 | 0.946  |
| Listeria_monocytogenes_serotype_1_2b_str_10-0810_1196163 | Listeria_monocytogenes_1639_v154 | 0.946  |
| Listeria_monocytogenes_serotype_1_2a_str_99-6370_1196179 | Listeria_monocytogenes_1639_v154 | 0.9688 |
| Listeria_monocytogenes_serotype_1_2a_str_98-2035_1196178 | Listeria_monocytogenes_1639_v154 | 0.9688 |
| Listeria_monocytogenes_serotype_1_2a_str_95-0093_1196177 | Listeria_monocytogenes_1639_v154 | 0.9746 |
| Listeria_monocytogenes_serotype_1_2a_str_88-0478_1196176 | Listeria_monocytogenes_1639_v154 | 0.9723 |
| Listeria_monocytogenes_serotype_1_2a_str_10-5024_1196192 | Listeria_monocytogenes_1639_v154 | 0.9749 |
| Listeria_monocytogenes_serotype_1_2a_str_10-4758_1196168 | Listeria_monocytogenes_1639_v154 | 0.968  |
| Listeria_monocytogenes_serotype_1_2a_str_10-4754_1196167 | Listeria_monocytogenes_1639_v154 | 0.968  |
| Listeria_monocytogenes_serotype_1_2a_str_10-1321_1196191 | Listeria_monocytogenes_1639_v154 | 0.9749 |
| Listeria_monocytogenes_serotype_1_2a_str_10-1047_1196190 | Listeria_monocytogenes_1639_v154 | 0.9753 |
| Listeria_monocytogenes_serotype_1_2a_str_10-1046_1196189 | Listeria_monocytogenes_1639_v154 | 0.9753 |
| Listeria_monocytogenes_serotype_1_2a_str_10-0934_1196170 | Listeria_monocytogenes_1639_v154 | 0.9688 |
| Listeria_monocytogenes_serotype_1_2a_str_10-0933_1196169 | Listeria_monocytogenes_1639_v154 | 0.9688 |
| Listeria_monocytogenes_serotype_1_2a_str_10-0815_1196188 | Listeria_monocytogenes_1639_v154 | 0.9698 |
| Listeria_monocytogenes_serotype_1_2a_str_10-0814_1196187 | Listeria_monocytogenes_1639_v154 | 0.9746 |
| Listeria_monocytogenes_serotype_1_2a_str_10-0813_1196166 | Listeria_monocytogenes_1639_v154 | 0.9664 |
| Listeria_monocytogenes_serotype_1_2a_str_10-0812_1196165 | Listeria_monocytogenes_1639_v154 | 0.9664 |
| Listeria_monocytogenes_serotype_1_2a_str_08-7669_1196186 | Listeria_monocytogenes_1639_v154 | 0.969  |
| Listeria_monocytogenes_serotype_1_2a_str_08-7374_1196185 | Listeria_monocytogenes_1639_v154 | 0.9749 |
| Listeria_monocytogenes_serotype_1_2a_str_08-6997_1196184 | Listeria_monocytogenes_1639_v154 | 0.9698 |
| Listeria_monocytogenes_serotype_1_2a_str_08-6569_1196183 | Listeria_monocytogenes_1639_v154 | 0.9698 |
| Listeria_monocytogenes_serotype_1_2a_str_08-6056_1196182 | Listeria_monocytogenes_1639_v154 | 0.9698 |
| Listeria_monocytogenes_serotype_1_2a_str_04-5457_1196181 | Listeria_monocytogenes_1639_v154 | 0.9749 |
| Listeria_monocytogenes_serotype_1_2a_str_02-5993_1196180 | Listeria_monocytogenes_1639_v154 | 0.9746 |
| Listeria_monocytogenes_R479a_1437838                     | Listeria_monocytogenes_1639_v154 | 0.9761 |
| Listeria_monocytogenes_N53-1_1234142                     | Listeria_monocytogenes_1639_v154 | 0.906  |
| Listeria_monocytogenes_M7_1030009                        | Listeria_monocytogenes_1639_v154 | 0.9107 |
| Listeria_monocytogenes_LO28_393132                       | Listeria_monocytogenes_1639_v154 | 0.9568 |
| Listeria_monocytogenes_L99_563174                        | Listeria_monocytogenes_1639_v154 | 0.9114 |
| Listeria_monocytogenes_L312_882094                       | Listeria_monocytogenes_1639_v154 | 0.9485 |
| Listeria_monocytogenes_J1816_930781                      | Listeria_monocytogenes_1639_v154 | 0.9278 |
| Listeria_monocytogenes_J1-220_930782                     | Listeria_monocytogenes_1639_v154 | 0.9315 |
| Listeria_monocytogenes_J0161_393130                      | Listeria_monocytogenes_1639_v154 | 0.9477 |
| Listeria_monocytogenes_HCC23_552536                      | Listeria_monocytogenes_1639_v154 | 0.9107 |

[illegible]





|                                                          |                                  |        |
|----------------------------------------------------------|----------------------------------|--------|
| Listeria_monocytogenes_serotype_1_2c_str_10-5025_1196193 | Listeria_monocytogenes_1639_v155 | 0.9593 |
| Listeria_monocytogenes_serotype_1_2b_str_10-0811_1196164 | Listeria_monocytogenes_1639_v155 | 0.9354 |
| Listeria_monocytogenes_serotype_1_2b_str_10-0810_1196163 | Listeria_monocytogenes_1639_v155 | 0.9354 |
| Listeria_monocytogenes_serotype_1_2a_str_99-6370_1196179 | Listeria_monocytogenes_1639_v155 | 0.9446 |
| Listeria_monocytogenes_serotype_1_2a_str_98-2035_1196178 | Listeria_monocytogenes_1639_v155 | 0.9446 |
| Listeria_monocytogenes_serotype_1_2a_str_95-0093_1196177 | Listeria_monocytogenes_1639_v155 | 0.9506 |
| Listeria_monocytogenes_serotype_1_2a_str_88-0478_1196176 | Listeria_monocytogenes_1639_v155 | 0.9494 |
| Listeria_monocytogenes_serotype_1_2a_str_10-5024_1196192 | Listeria_monocytogenes_1639_v155 | 0.9509 |
| Listeria_monocytogenes_serotype_1_2a_str_10-4758_1196168 | Listeria_monocytogenes_1639_v155 | 0.9547 |
| Listeria_monocytogenes_serotype_1_2a_str_10-4754_1196167 | Listeria_monocytogenes_1639_v155 | 0.9547 |
| Listeria_monocytogenes_serotype_1_2a_str_10-1321_1196191 | Listeria_monocytogenes_1639_v155 | 0.9509 |
| Listeria_monocytogenes_serotype_1_2a_str_10-1047_1196190 | Listeria_monocytogenes_1639_v155 | 0.9509 |
| Listeria_monocytogenes_serotype_1_2a_str_10-1046_1196189 | Listeria_monocytogenes_1639_v155 | 0.9509 |
| Listeria_monocytogenes_serotype_1_2a_str_10-0934_1196170 | Listeria_monocytogenes_1639_v155 | 0.9618 |
| Listeria_monocytogenes_serotype_1_2a_str_10-0933_1196169 | Listeria_monocytogenes_1639_v155 | 0.9618 |
| Listeria_monocytogenes_serotype_1_2a_str_10-0815_1196188 | Listeria_monocytogenes_1639_v155 | 0.946  |
| Listeria_monocytogenes_serotype_1_2a_str_10-0814_1196187 | Listeria_monocytogenes_1639_v155 | 0.9506 |
| Listeria_monocytogenes_serotype_1_2a_str_10-0813_1196166 | Listeria_monocytogenes_1639_v155 | 0.9535 |
| Listeria_monocytogenes_serotype_1_2a_str_10-0812_1196165 | Listeria_monocytogenes_1639_v155 | 0.9535 |
| Listeria_monocytogenes_serotype_1_2a_str_08-7669_1196186 | Listeria_monocytogenes_1639_v155 | 0.9591 |
| Listeria_monocytogenes_serotype_1_2a_str_08-7374_1196185 | Listeria_monocytogenes_1639_v155 | 0.9509 |
| Listeria_monocytogenes_serotype_1_2a_str_08-6997_1196184 | Listeria_monocytogenes_1639_v155 | 0.946  |
| Listeria_monocytogenes_serotype_1_2a_str_08-6569_1196183 | Listeria_monocytogenes_1639_v155 | 0.946  |
| Listeria_monocytogenes_serotype_1_2a_str_08-6056_1196182 | Listeria_monocytogenes_1639_v155 | 0.946  |
| Listeria_monocytogenes_serotype_1_2a_str_04-5457_1196181 | Listeria_monocytogenes_1639_v155 | 0.9509 |
| Listeria_monocytogenes_serotype_1_2a_str_02-5993_1196180 | Listeria_monocytogenes_1639_v155 | 0.9506 |
| Listeria_monocytogenes_R479a_1437838                     | Listeria_monocytogenes_1639_v155 | 0.9465 |
| Listeria_monocytogenes_N53-1_1234142                     | Listeria_monocytogenes_1639_v155 | 0.9118 |
| Listeria_monocytogenes_M7_1030009                        | Listeria_monocytogenes_1639_v155 | 0.9099 |
| Listeria_monocytogenes_LO28_393132                       | Listeria_monocytogenes_1639_v155 | 0.9518 |
| Listeria_monocytogenes_L99_563174                        | Listeria_monocytogenes_1639_v155 | 0.9106 |
| Listeria_monocytogenes_L312_882094                       | Listeria_monocytogenes_1639_v155 | 0.9462 |
| Listeria_monocytogenes_J1816_930781                      | Listeria_monocytogenes_1639_v155 | 0.9353 |
| Listeria_monocytogenes_J1-220_930782                     | Listeria_monocytogenes_1639_v155 | 0.9266 |
| Listeria_monocytogenes_J0161_393130                      | Listeria_monocytogenes_1639_v155 | 0.9623 |
| Listeria_monocytogenes_HCC23_552536                      | Listeria_monocytogenes_1639_v155 | 0.9102 |
| Listeria_monocytogenes_FSL_R2-561_393126                 | Listeria_monocytogenes_1639_v155 | 0.9567 |
| Listeria_monocytogenes_FSL_J1-208_393119                 | Listeria_monocytogenes_1639_v155 | 0.9081 |
| Listeria_monocytogenes_FSL_J1-175_393118                 | Listeria_monocytogenes_1639_v155 | 0.9398 |
| Listeria_monocytogenes_Finland_1998_393127               | Listeria_monocytogenes_1639_v155 | 0.9622 |
| Listeria_monocytogenes_EGD-e_169963_v1                   | Listeria_monocytogenes_1639_v155 | 0.9624 |
| Listeria_monocytogenes_EGD-e_169963                      | Listeria_monocytogenes_1639_v155 | 0.9624 |
| Listeria_monocytogenes_EGD_1334565                       | Listeria_monocytogenes_1639_v155 | 0.9565 |
| Listeria_monocytogenes_CFSAN002349_1299895               | Listeria_monocytogenes_1639_v155 | 0.9414 |
| Listeria_monocytogenes_ATCC_19117_882095_v1              | Listeria_monocytogenes_1639_v155 | 0.938  |
| Listeria_monocytogenes_ATCC_19117_882095                 | Listeria_monocytogenes_1639_v155 | 0.938  |
| Listeria_monocytogenes_6179_1288295                      | Listeria_monocytogenes_1639_v155 | 0.9432 |
| Listeria_monocytogenes_1639_v9                           | Listeria_monocytogenes_1639_v155 | 0.9245 |
| Listeria_monocytogenes_1639_v99                          | Listeria_monocytogenes_1639_v155 | 0.9372 |
| Listeria_monocytogenes_1639_v98                          | Listeria_monocytogenes_1639_v155 | 0.9842 |
| Listeria_monocytogenes_1639_v97                          | Listeria_monocytogenes_1639_v155 | 0.9424 |
| Listeria_monocytogenes_1639_v96                          | Listeria_monocytogenes_1639_v155 | 0.9357 |
| Listeria_monocytogenes_1639_v95                          | Listeria_monocytogenes_1639_v155 | 0.9358 |
| Listeria_monocytogenes_1639_v94                          | Listeria_monocytogenes_1639_v155 | 0.9361 |
| Listeria_monocytogenes_1639_v93                          | Listeria_monocytogenes_1639_v155 | 0.9367 |
| Listeria_monocytogenes_1639_v92                          | Listeria_monocytogenes_1639_v155 | 0.9368 |
| Listeria_monocytogenes_1639_v91                          | Listeria_monocytogenes_1639_v155 | 0.9273 |
| Listeria_monocytogenes_1639_v90                          | Listeria_monocytogenes_1639_v155 | 0.9842 |
| Listeria_monocytogenes_1639_v8                           | Listeria_monocytogenes_1639_v155 | 0.9364 |
| Listeria_monocytogenes_1639_v89                          | Listeria_monocytogenes_1639_v155 | 0.9421 |
| Listeria_monocytogenes_1639_v88                          | Listeria_monocytogenes_1639_v155 | 0.9588 |
| Listeria_monocytogenes_1639_v87                          | Listeria_monocytogenes_1639_v155 | 0.9511 |
| Listeria_monocytogenes_1639_v86                          | Listeria_monocytogenes_1639_v155 | 0.9511 |
| Listeria_monocytogenes_1639_v85                          | Listeria_monocytogenes_1639_v155 | 0.9276 |
| Listeria_monocytogenes_1639_v84                          | Listeria_monocytogenes_1639_v155 | 0.9632 |
| Listeria_monocytogenes_1639_v83                          | Listeria_monocytogenes_1639_v155 | 0.9319 |
| Listeria_monocytogenes_1639_v82                          | Listeria_monocytogenes_1639_v155 | 0.9316 |
| Listeria_monocytogenes_1639_v81                          | Listeria_monocytogenes_1639_v155 | 0.9577 |
| Listeria_monocytogenes_1639_v80                          | Listeria_monocytogenes_1639_v155 | 0.9371 |
| Listeria_monocytogenes_1639_v7                           | Listeria_monocytogenes_1639_v155 | 0.9364 |
| Listeria_monocytogenes_1639_v79                          | Listeria_monocytogenes_1639_v155 | 0.9555 |
| Listeria_monocytogenes_1639_v78                          | Listeria_monocytogenes_1639_v155 | 0.9569 |
| Listeria_monocytogenes_1639_v77                          | Listeria_monocytogenes_1639_v155 | 0.9579 |
| Listeria_monocytogenes_1639_v76                          | Listeria_monocytogenes_1639_v155 | 0.9479 |
| Listeria_monocytogenes_1639_v75                          | Listeria_monocytogenes_1639_v155 | 0.9106 |
| Listeria_monocytogenes_1639_v74                          | Listeria_monocytogenes_1639_v155 | 0.9462 |
| Listeria_monocytogenes_1639_v73                          | Listeria_monocytogenes_1639_v155 | 0.9468 |
| Listeria_monocytogenes_1639_v72                          | Listeria_monocytogenes_1639_v155 | 0.9322 |
| Listeria_monocytogenes_1639_v71                          | Listeria_monocytogenes_1639_v155 | 0.9395 |
| Listeria_monocytogenes_1639_v70                          | Listeria_monocytogenes_1639_v155 | 0.9561 |
| Listeria_monocytogenes_1639_v6                           | Listeria_monocytogenes_1639_v155 | 0.9357 |
| Listeria_monocytogenes_1639_v69                          | Listeria_monocytogenes_1639_v155 | 0.9282 |
| Listeria_monocytogenes_1639_v68                          | Listeria_monocytogenes_1639_v155 | 0.9557 |
| Listeria_monocytogenes_1639_v67                          | Listeria_monocytogenes_1639_v155 | 0.9418 |
| Listeria_monocytogenes_1639_v66                          | Listeria_monocytogenes_1639_v155 | 0.9525 |
| Listeria_monocytogenes_1639_v65                          | Listeria_monocytogenes_1639_v155 | 0.9467 |
| Listeria_monocytogenes_1639_v64                          | Listeria_monocytogenes_1639_v155 | 0.9445 |
| Listeria_monocytogenes_1639_v63                          | Listeria_monocytogenes_1639_v155 | 0.9402 |
| Listeria_monocytogenes_1639_v62                          | Listeria_monocytogenes_1639_v155 | 0.9533 |
| Listeria_monocytogenes_1639_v61                          | Listeria_monocytogenes_1639_v155 | 0.9534 |
| Listeria_monocytogenes_1639_v60                          | Listeria_monocytogenes_1639_v155 | 0.9629 |

[illegible]









|                                                          |                                  |        |
|----------------------------------------------------------|----------------------------------|--------|
| Listeria_monocytogenes_serotype_1_2a_str_08-6569_1196183 | Listeria_monocytogenes_1639_v157 | 0.9184 |
| Listeria_monocytogenes_serotype_1_2a_str_08-6056_1196182 | Listeria_monocytogenes_1639_v157 | 0.9184 |
| Listeria_monocytogenes_serotype_1_2a_str_04-5457_1196181 | Listeria_monocytogenes_1639_v157 | 0.9229 |
| Listeria_monocytogenes_serotype_1_2a_str_02-5993_1196180 | Listeria_monocytogenes_1639_v157 | 0.9225 |
| Listeria_monocytogenes_R479a_1437838                     | Listeria_monocytogenes_1639_v157 | 0.9218 |
| Listeria_monocytogenes_N53-1_1234142                     | Listeria_monocytogenes_1639_v157 | 0.8966 |
| Listeria_monocytogenes_M7_1030009                        | Listeria_monocytogenes_1639_v157 | 0.9099 |
| Listeria_monocytogenes_LO28_393132                       | Listeria_monocytogenes_1639_v157 | 0.9297 |
| Listeria_monocytogenes_L99_563174                        | Listeria_monocytogenes_1639_v157 | 0.9106 |
| Listeria_monocytogenes_L312_882094                       | Listeria_monocytogenes_1639_v157 | 0.9795 |
| Listeria_monocytogenes_J1816_930781                      | Listeria_monocytogenes_1639_v157 | 0.955  |
| Listeria_monocytogenes_J1-220_930782                     | Listeria_monocytogenes_1639_v157 | 0.9567 |
| Listeria_monocytogenes_J0161_393130                      | Listeria_monocytogenes_1639_v157 | 0.9293 |
| Listeria_monocytogenes_HCC23_552536                      | Listeria_monocytogenes_1639_v157 | 0.9098 |
| Listeria_monocytogenes_FSL_R2-561_393126                 | Listeria_monocytogenes_1639_v157 | 0.9297 |
| Listeria_monocytogenes_FSL_J1-208_393119                 | Listeria_monocytogenes_1639_v157 | 0.9245 |
| Listeria_monocytogenes_FSL_J1-175_393118                 | Listeria_monocytogenes_1639_v157 | 0.9586 |
| Listeria_monocytogenes_Finland_1998_393127               | Listeria_monocytogenes_1639_v157 | 0.9484 |
| Listeria_monocytogenes_EGD-e_169963_v1                   | Listeria_monocytogenes_1639_v157 | 0.9389 |
| Listeria_monocytogenes_EGD-e_169963                      | Listeria_monocytogenes_1639_v157 | 0.9393 |
| Listeria_monocytogenes_EGD_1334565                       | Listeria_monocytogenes_1639_v157 | 0.9371 |
| Listeria_monocytogenes_CFSAN002349_1299895               | Listeria_monocytogenes_1639_v157 | 0.9784 |
| Listeria_monocytogenes_ATCC_19117_882095_v1              | Listeria_monocytogenes_1639_v157 | 0.9773 |
| Listeria_monocytogenes_ATCC_19117_882095                 | Listeria_monocytogenes_1639_v157 | 0.9773 |
| Listeria_monocytogenes_6179_1288295                      | Listeria_monocytogenes_1639_v157 | 0.9142 |
| Listeria_monocytogenes_1639_v9                           | Listeria_monocytogenes_1639_v157 | 0.929  |
| Listeria_monocytogenes_1639_v99                          | Listeria_monocytogenes_1639_v157 | 0.9562 |
| Listeria_monocytogenes_1639_v98                          | Listeria_monocytogenes_1639_v157 | 0.9258 |
| Listeria_monocytogenes_1639_v97                          | Listeria_monocytogenes_1639_v157 | 0.9699 |
| Listeria_monocytogenes_1639_v96                          | Listeria_monocytogenes_1639_v157 | 0.9555 |
| Listeria_monocytogenes_1639_v95                          | Listeria_monocytogenes_1639_v157 | 0.9555 |
| Listeria_monocytogenes_1639_v94                          | Listeria_monocytogenes_1639_v157 | 0.9555 |
| Listeria_monocytogenes_1639_v93                          | Listeria_monocytogenes_1639_v157 | 0.9285 |
| Listeria_monocytogenes_1639_v92                          | Listeria_monocytogenes_1639_v157 | 0.9558 |
| Listeria_monocytogenes_1639_v91                          | Listeria_monocytogenes_1639_v157 | 0.9784 |
| Listeria_monocytogenes_1639_v90                          | Listeria_monocytogenes_1639_v157 | 0.9258 |
| Listeria_monocytogenes_1639_v8                           | Listeria_monocytogenes_1639_v157 | 0.9116 |
| Listeria_monocytogenes_1639_v89                          | Listeria_monocytogenes_1639_v157 | 0.966  |
| Listeria_monocytogenes_1639_v88                          | Listeria_monocytogenes_1639_v157 | 0.9294 |
| Listeria_monocytogenes_1639_v87                          | Listeria_monocytogenes_1639_v157 | 0.9247 |
| Listeria_monocytogenes_1639_v86                          | Listeria_monocytogenes_1639_v157 | 0.924  |
| Listeria_monocytogenes_1639_v85                          | Listeria_monocytogenes_1639_v157 | 0.9799 |
| Listeria_monocytogenes_1639_v84                          | Listeria_monocytogenes_1639_v157 | 0.9334 |
| Listeria_monocytogenes_1639_v83                          | Listeria_monocytogenes_1639_v157 | 0.9658 |
| Listeria_monocytogenes_1639_v82                          | Listeria_monocytogenes_1639_v157 | 0.9651 |
| Listeria_monocytogenes_1639_v81                          | Listeria_monocytogenes_1639_v157 | 0.9286 |
| Listeria_monocytogenes_1639_v80                          | Listeria_monocytogenes_1639_v157 | 0.9501 |
| Listeria_monocytogenes_1639_v7                           | Listeria_monocytogenes_1639_v157 | 0.9116 |
| Listeria_monocytogenes_1639_v79                          | Listeria_monocytogenes_1639_v157 | 0.9265 |
| Listeria_monocytogenes_1639_v78                          | Listeria_monocytogenes_1639_v157 | 0.9279 |
| Listeria_monocytogenes_1639_v77                          | Listeria_monocytogenes_1639_v157 | 0.9322 |
| Listeria_monocytogenes_1639_v76                          | Listeria_monocytogenes_1639_v157 | 0.9243 |
| Listeria_monocytogenes_1639_v75                          | Listeria_monocytogenes_1639_v157 | 0.9106 |
| Listeria_monocytogenes_1639_v74                          | Listeria_monocytogenes_1639_v157 | 0.9233 |
| Listeria_monocytogenes_1639_v73                          | Listeria_monocytogenes_1639_v157 | 0.9248 |
| Listeria_monocytogenes_1639_v72                          | Listeria_monocytogenes_1639_v157 | 0.9646 |
| Listeria_monocytogenes_1639_v71                          | Listeria_monocytogenes_1639_v157 | 0.9122 |
| Listeria_monocytogenes_1639_v70                          | Listeria_monocytogenes_1639_v157 | 0.9276 |
| Listeria_monocytogenes_1639_v6                           | Listeria_monocytogenes_1639_v157 | 0.9109 |
| Listeria_monocytogenes_1639_v69                          | Listeria_monocytogenes_1639_v157 | 0.9822 |
| Listeria_monocytogenes_1639_v68                          | Listeria_monocytogenes_1639_v157 | 0.9335 |
| Listeria_monocytogenes_1639_v67                          | Listeria_monocytogenes_1639_v157 | 0.9495 |
| Listeria_monocytogenes_1639_v66                          | Listeria_monocytogenes_1639_v157 | 0.9373 |
| Listeria_monocytogenes_1639_v65                          | Listeria_monocytogenes_1639_v157 | 0.926  |
| Listeria_monocytogenes_1639_v64                          | Listeria_monocytogenes_1639_v157 | 0.9306 |
| Listeria_monocytogenes_1639_v63                          | Listeria_monocytogenes_1639_v157 | 0.9449 |
| Listeria_monocytogenes_1639_v62                          | Listeria_monocytogenes_1639_v157 | 0.9244 |
| Listeria_monocytogenes_1639_v61                          | Listeria_monocytogenes_1639_v157 | 0.9256 |
| Listeria_monocytogenes_1639_v60                          | Listeria_monocytogenes_1639_v157 | 0.9312 |
| Listeria_monocytogenes_1639_v5                           | Listeria_monocytogenes_1639_v157 | 0.9103 |
| Listeria_monocytogenes_1639_v59                          | Listeria_monocytogenes_1639_v157 | 0.9665 |
| Listeria_monocytogenes_1639_v58                          | Listeria_monocytogenes_1639_v157 | 0.973  |
| Listeria_monocytogenes_1639_v57                          | Listeria_monocytogenes_1639_v157 | 0.9523 |
| Listeria_monocytogenes_1639_v56                          | Listeria_monocytogenes_1639_v157 | 0.9662 |
| Listeria_monocytogenes_1639_v55                          | Listeria_monocytogenes_1639_v157 | 0.9479 |
| Listeria_monocytogenes_1639_v54                          | Listeria_monocytogenes_1639_v157 | 0.9284 |
| Listeria_monocytogenes_1639_v53                          | Listeria_monocytogenes_1639_v157 | 0.9331 |
| Listeria_monocytogenes_1639_v52                          | Listeria_monocytogenes_1639_v157 | 0.9629 |
| Listeria_monocytogenes_1639_v51                          | Listeria_monocytogenes_1639_v157 | 0.9603 |
| Listeria_monocytogenes_1639_v50                          | Listeria_monocytogenes_1639_v157 | 0.9221 |
| Listeria_monocytogenes_1639_v4                           | Listeria_monocytogenes_1639_v157 | 0.9234 |
| Listeria_monocytogenes_1639_v49                          | Listeria_monocytogenes_1639_v157 | 0.9807 |
| Listeria_monocytogenes_1639_v48                          | Listeria_monocytogenes_1639_v157 | 0.9255 |
| Listeria_monocytogenes_1639_v47                          | Listeria_monocytogenes_1639_v157 | 0.9225 |
| Listeria_monocytogenes_1639_v46                          | Listeria_monocytogenes_1639_v157 | 0.9328 |
| Listeria_monocytogenes_1639_v45                          | Listeria_monocytogenes_1639_v157 | 0.9133 |
| Listeria_monocytogenes_1639_v44                          | Listeria_monocytogenes_1639_v157 | 0.9229 |
| Listeria_monocytogenes_1639_v43                          | Listeria_monocytogenes_1639_v157 | 0.9229 |
| Listeria_monocytogenes_1639_v42                          | Listeria_monocytogenes_1639_v157 | 0.9181 |
| Listeria_monocytogenes_1639_v41                          | Listeria_monocytogenes_1639_v157 | 0.9039 |
| Listeria_monocytogenes_1639_v40                          | Listeria_monocytogenes_1639_v157 | 0.93   |





[illegible]







Listeria\_monocytogenes\_1639\_v196  
Listeria\_monocytogenes\_1639\_v195  
Listeria\_monocytogenes\_1639\_v194  
Listeria\_monocytogenes\_1639\_v193  
Listeria\_monocytogenes\_1639\_v192  
Listeria\_monocytogenes\_1639\_v191  
Listeria\_monocytogenes\_1639\_v190  
Listeria\_monocytogenes\_1639\_v18  
Listeria\_monocytogenes\_1639\_v189  
Listeria\_monocytogenes\_1639\_v188  
Listeria\_monocytogenes\_1639\_v187  
Listeria\_monocytogenes\_1639\_v186  
Listeria\_monocytogenes\_1639\_v185  
Listeria\_monocytogenes\_1639\_v184  
Listeria\_monocytogenes\_1639\_v183  
Listeria\_monocytogenes\_1639\_v182  
Listeria\_monocytogenes\_1639\_v181  
Listeria\_monocytogenes\_1639\_v180  
Listeria\_monocytogenes\_1639\_v17  
Listeria\_monocytogenes\_1639\_v179  
Listeria\_monocytogenes\_1639\_v178  
Listeria\_monocytogenes\_1639\_v177  
Listeria\_monocytogenes\_1639\_v176  
Listeria\_monocytogenes\_1639\_v175  
Listeria\_monocytogenes\_1639\_v174  
Listeria\_monocytogenes\_1639\_v173  
Listeria\_monocytogenes\_1639\_v172  
Listeria\_monocytogenes\_1639\_v171  
Listeria\_monocytogenes\_1639\_v170  
Listeria\_monocytogenes\_1639\_v16  
Listeria\_monocytogenes\_1639\_v169  
Listeria\_monocytogenes\_1639\_v168  
Listeria\_monocytogenes\_1639\_v167  
Listeria\_monocytogenes\_1639\_v166  
Listeria\_monocytogenes\_1639\_v165  
Listeria\_monocytogenes\_1639\_v164  
Listeria\_monocytogenes\_1639\_v163  
Listeria\_monocytogenes\_1639\_v162  
Listeria\_monocytogenes\_1639\_v161  
Listeria\_monocytogenes\_1639\_v160  
Listeria\_monocytogenes\_1639\_v15  
Listeria\_monocytogenes\_1639\_v159  
Listeria\_welshimeri\_1643  
Listeria\_welshimeri\_serovar\_6b\_str\_SLCC5334\_386043  
Listeria\_seeligeri\_serovar\_1\_2b\_str\_SLCC3954\_683837  
Listeria\_seeligeri\_FSL\_S4-171\_702452  
Listeria\_seeligeri\_FSL\_N1-067\_702453  
Listeria\_seeligeri\_1640\_v1  
Listeria\_seeligeri\_1640  
Listeria\_monocytogenes\_WSLC1042\_1457188  
Listeria\_monocytogenes\_WSLC1001\_1457187  
Listeria\_monocytogenes\_SLCC7179\_879090  
Listeria\_monocytogenes\_SLCC5850\_882096  
Listeria\_monocytogenes\_SLCC2755\_932919  
Listeria\_monocytogenes\_SLCC2540\_879089  
Listeria\_monocytogenes\_SLCC2479\_882020  
Listeria\_monocytogenes\_SLCC2378\_879088  
Listeria\_monocytogenes\_SLCC2376\_882097  
Listeria\_monocytogenes\_SLCC2372\_932920  
Listeria\_monocytogenes\_serotype\_4b\_str\_LL195\_1230340  
Listeria\_monocytogenes\_serotype\_4b\_str\_LIS0087\_1134669  
Listeria\_monocytogenes\_serotype\_4b\_str\_F2365\_265669  
Listeria\_monocytogenes\_serotype\_4b\_str\_CLIP\_80459\_568819  
Listeria\_monocytogenes\_serotype\_4b\_str\_81-0861\_1196161  
Listeria\_monocytogenes\_serotype\_4b\_str\_81-0592\_1196160  
Listeria\_monocytogenes\_serotype\_4b\_str\_81-0558\_1196159  
Listeria\_monocytogenes\_serotype\_4b\_str\_10-0809\_1196162  
Listeria\_monocytogenes\_serotype\_4b\_str\_02-6680\_1196175  
Listeria\_monocytogenes\_serotype\_4b\_str\_02-6679\_1196174  
Listeria\_monocytogenes\_serotype\_4b\_str\_02-1792\_1196173  
Listeria\_monocytogenes\_serotype\_4b\_str\_02-1289\_1196172  
Listeria\_monocytogenes\_serotype\_4b\_str\_02-1103\_1196171  
Listeria\_monocytogenes\_serotype\_3c\_str\_10-5027\_1196195  
Listeria\_monocytogenes\_serotype\_1\_2c\_str\_10-5026\_1196194  
Listeria\_monocytogenes\_serotype\_1\_2c\_str\_10-5025\_1196193  
Listeria\_monocytogenes\_serotype\_1\_2b\_str\_10-0811\_1196164  
Listeria\_monocytogenes\_serotype\_1\_2b\_str\_10-0810\_1196163  
Listeria\_monocytogenes\_serotype\_1\_2a\_str\_99-6370\_1196179  
Listeria\_monocytogenes\_serotype\_1\_2a\_str\_98-2035\_1196178  
Listeria\_monocytogenes\_serotype\_1\_2a\_str\_95-0093\_1196177  
Listeria\_monocytogenes\_serotype\_1\_2a\_str\_88-0478\_1196176  
Listeria\_monocytogenes\_serotype\_1\_2a\_str\_10-5024\_1196192  
Listeria\_monocytogenes\_serotype\_1\_2a\_str\_10-4758\_1196168  
Listeria\_monocytogenes\_serotype\_1\_2a\_str\_10-4754\_1196167  
Listeria\_monocytogenes\_serotype\_1\_2a\_str\_10-1321\_1196191  
Listeria\_monocytogenes\_serotype\_1\_2a\_str\_10-1047\_1196190  
Listeria\_monocytogenes\_serotype\_1\_2a\_str\_10-1046\_1196189  
Listeria\_monocytogenes\_serotype\_1\_2a\_str\_10-0934\_1196170  
Listeria\_monocytogenes\_serotype\_1\_2a\_str\_10-0933\_1196169  
Listeria\_monocytogenes\_serotype\_1\_2a\_str\_10-0815\_1196188  
Listeria\_monocytogenes\_serotype\_1\_2a\_str\_10-0814\_1196187

Listeria\_monocytogenes\_1639\_v159 0.9245  
Listeria\_monocytogenes\_1639\_v159 0.9489  
Listeria\_monocytogenes\_1639\_v159 0.9482  
Listeria\_monocytogenes\_1639\_v159 0.9482  
Listeria\_monocytogenes\_1639\_v159 0.9114  
Listeria\_monocytogenes\_1639\_v159 0.953  
Listeria\_monocytogenes\_1639\_v159 0.9539  
Listeria\_monocytogenes\_1639\_v159 0.9691  
Listeria\_monocytogenes\_1639\_v159 0.9527  
Listeria\_monocytogenes\_1639\_v159 0.9534  
Listeria\_monocytogenes\_1639\_v159 0.9539  
Listeria\_monocytogenes\_1639\_v159 0.9539  
Listeria\_monocytogenes\_1639\_v159 0.9542  
Listeria\_monocytogenes\_1639\_v159 0.9531  
Listeria\_monocytogenes\_1639\_v159 0.9469  
Listeria\_monocytogenes\_1639\_v159 0.9491  
Listeria\_monocytogenes\_1639\_v159 0.9348  
Listeria\_monocytogenes\_1639\_v159 0.9348  
Listeria\_monocytogenes\_1639\_v159 0.9694  
Listeria\_monocytogenes\_1639\_v159 0.9378  
Listeria\_monocytogenes\_1639\_v159 0.9535  
Listeria\_monocytogenes\_1639\_v159 0.9992  
Listeria\_monocytogenes\_1639\_v159 0.9463  
Listeria\_monocytogenes\_1639\_v159 0.9416  
Listeria\_monocytogenes\_1639\_v159 0.9539  
Listeria\_monocytogenes\_1639\_v159 0.971  
Listeria\_monocytogenes\_1639\_v159 0.9442  
Listeria\_monocytogenes\_1639\_v159 0.939  
Listeria\_monocytogenes\_1639\_v159 0.9473  
Listeria\_monocytogenes\_1639\_v159 0.9124  
Listeria\_monocytogenes\_1639\_v159 0.9462  
Listeria\_monocytogenes\_1639\_v159 0.9513  
Listeria\_monocytogenes\_1639\_v159 0.9396  
Listeria\_monocytogenes\_1639\_v159 0.9517  
Listeria\_monocytogenes\_1639\_v159 0.9458  
Listeria\_monocytogenes\_1639\_v159 0.9749  
Listeria\_monocytogenes\_1639\_v159 0.9646  
Listeria\_monocytogenes\_1639\_v159 0.9749  
Listeria\_monocytogenes\_1639\_v159 0.9753  
Listeria\_monocytogenes\_1639\_v159 0.975  
Listeria\_monocytogenes\_1639\_v159 0.9304  
Listeria\_monocytogenes\_1639\_v159 0.0646  
Listeria\_monocytogenes\_1639\_v15 0.8537  
Listeria\_monocytogenes\_1639\_v15 0.8534  
Listeria\_monocytogenes\_1639\_v15 0.8604  
Listeria\_monocytogenes\_1639\_v15 0.8011  
Listeria\_monocytogenes\_1639\_v15 0.8186  
Listeria\_monocytogenes\_1639\_v15 0.8636  
Listeria\_monocytogenes\_1639\_v15 0.88  
Listeria\_monocytogenes\_1639\_v15 0.9234  
Listeria\_monocytogenes\_1639\_v15 0.9223  
Listeria\_monocytogenes\_1639\_v15 0.9246  
Listeria\_monocytogenes\_1639\_v15 0.9238  
Listeria\_monocytogenes\_1639\_v15 0.931  
Listeria\_monocytogenes\_1639\_v15 0.9406  
Listeria\_monocytogenes\_1639\_v15 0.9232  
Listeria\_monocytogenes\_1639\_v15 0.9245  
Listeria\_monocytogenes\_1639\_v15 0.9115  
Listeria\_monocytogenes\_1639\_v15 0.9306  
Listeria\_monocytogenes\_1639\_v15 0.9299  
Listeria\_monocytogenes\_1639\_v15 0.9134  
Listeria\_monocytogenes\_1639\_v15 0.9299  
Listeria\_monocytogenes\_1639\_v15 0.9306  
Listeria\_monocytogenes\_1639\_v15 0.9282  
Listeria\_monocytogenes\_1639\_v15 0.9292  
Listeria\_monocytogenes\_1639\_v15 0.9285  
Listeria\_monocytogenes\_1639\_v15 0.9296  
Listeria\_monocytogenes\_1639\_v15 0.9263  
Listeria\_monocytogenes\_1639\_v15 0.9263  
Listeria\_monocytogenes\_1639\_v15 0.9314  
Listeria\_monocytogenes\_1639\_v15 0.9314  
Listeria\_monocytogenes\_1639\_v15 0.9314  
Listeria\_monocytogenes\_1639\_v15 0.9279  
Listeria\_monocytogenes\_1639\_v15 0.9283  
Listeria\_monocytogenes\_1639\_v15 0.9283  
Listeria\_monocytogenes\_1639\_v15 0.9645  
Listeria\_monocytogenes\_1639\_v15 0.9645  
Listeria\_monocytogenes\_1639\_v15 0.9155  
Listeria\_monocytogenes\_1639\_v15 0.9155  
Listeria\_monocytogenes\_1639\_v15 0.9193  
Listeria\_monocytogenes\_1639\_v15 0.916  
Listeria\_monocytogenes\_1639\_v15 0.9193  
Listeria\_monocytogenes\_1639\_v15 0.9261  
Listeria\_monocytogenes\_1639\_v15 0.9264  
Listeria\_monocytogenes\_1639\_v15 0.9193  
Listeria\_monocytogenes\_1639\_v15 0.9185  
Listeria\_monocytogenes\_1639\_v15 0.9185  
Listeria\_monocytogenes\_1639\_v15 0.9203  
Listeria\_monocytogenes\_1639\_v15 0.9203  
Listeria\_monocytogenes\_1639\_v15 0.9161  
Listeria\_monocytogenes\_1639\_v15 0.9197

|                                                          |                                 |        |
|----------------------------------------------------------|---------------------------------|--------|
| Listeria_monocytogenes_serotype_1_2a_str_10-0813_1196166 | Listeria_monocytogenes_1639_v15 | 0.9306 |
| Listeria_monocytogenes_serotype_1_2a_str_10-0812_1196165 | Listeria_monocytogenes_1639_v15 | 0.9306 |
| Listeria_monocytogenes_serotype_1_2a_str_08-7669_1196186 | Listeria_monocytogenes_1639_v15 | 0.9126 |
| Listeria_monocytogenes_serotype_1_2a_str_08-7374_1196185 | Listeria_monocytogenes_1639_v15 | 0.9193 |
| Listeria_monocytogenes_serotype_1_2a_str_08-6997_1196184 | Listeria_monocytogenes_1639_v15 | 0.9161 |
| Listeria_monocytogenes_serotype_1_2a_str_08-6569_1196183 | Listeria_monocytogenes_1639_v15 | 0.9161 |
| Listeria_monocytogenes_serotype_1_2a_str_08-6056_1196182 | Listeria_monocytogenes_1639_v15 | 0.9161 |
| Listeria_monocytogenes_serotype_1_2a_str_04-5457_1196181 | Listeria_monocytogenes_1639_v15 | 0.9193 |
| Listeria_monocytogenes_serotype_1_2a_str_02-5993_1196180 | Listeria_monocytogenes_1639_v15 | 0.9193 |
| Listeria_monocytogenes_R479a_1437838                     | Listeria_monocytogenes_1639_v15 | 0.9248 |
| Listeria_monocytogenes_N53-1_1234142                     | Listeria_monocytogenes_1639_v15 | 0.8774 |
| Listeria_monocytogenes_M7_1030009                        | Listeria_monocytogenes_1639_v15 | 0.9017 |
| Listeria_monocytogenes_LO28_393132                       | Listeria_monocytogenes_1639_v15 | 0.9309 |
| Listeria_monocytogenes_L99_563174                        | Listeria_monocytogenes_1639_v15 | 0.9021 |
| Listeria_monocytogenes_L312_882094                       | Listeria_monocytogenes_1639_v15 | 0.931  |
| Listeria_monocytogenes_J1816_930781                      | Listeria_monocytogenes_1639_v15 | 0.9215 |
| Listeria_monocytogenes_J1-220_930782                     | Listeria_monocytogenes_1639_v15 | 0.9298 |
| Listeria_monocytogenes_J0161_393130                      | Listeria_monocytogenes_1639_v15 | 0.9225 |
| Listeria_monocytogenes_HCC23_552536                      | Listeria_monocytogenes_1639_v15 | 0.9014 |
| Listeria_monocytogenes_FSL_R2-561_393126                 | Listeria_monocytogenes_1639_v15 | 0.9232 |
| Listeria_monocytogenes_FSL_J1-208_393119                 | Listeria_monocytogenes_1639_v15 | 0.8821 |
| Listeria_monocytogenes_FSL_J1-175_393118                 | Listeria_monocytogenes_1639_v15 | 0.9422 |
| Listeria_monocytogenes_Finland_1998_393127               | Listeria_monocytogenes_1639_v15 | 0.9214 |
| Listeria_monocytogenes_EGD-e_169963_v1                   | Listeria_monocytogenes_1639_v15 | 0.9266 |
| Listeria_monocytogenes_EGD-e_169963                      | Listeria_monocytogenes_1639_v15 | 0.9269 |
| Listeria_monocytogenes_EGD_1334565                       | Listeria_monocytogenes_1639_v15 | 0.9245 |
| Listeria_monocytogenes_CFSAN002349_1299895               | Listeria_monocytogenes_1639_v15 | 0.9323 |
| Listeria_monocytogenes_ATCC_19117_882095_v1              | Listeria_monocytogenes_1639_v15 | 0.9254 |
| Listeria_monocytogenes_ATCC_19117_882095                 | Listeria_monocytogenes_1639_v15 | 0.925  |
| Listeria_monocytogenes_6179_1288295                      | Listeria_monocytogenes_1639_v15 | 0.925  |
| Listeria_monocytogenes_1639_v9                           | Listeria_monocytogenes_1639_v15 | 0.9542 |
| Listeria_monocytogenes_1639_v99                          | Listeria_monocytogenes_1639_v15 | 0.9303 |
| Listeria_monocytogenes_1639_v98                          | Listeria_monocytogenes_1639_v15 | 0.9199 |
| Listeria_monocytogenes_1639_v97                          | Listeria_monocytogenes_1639_v15 | 0.9231 |
| Listeria_monocytogenes_1639_v96                          | Listeria_monocytogenes_1639_v15 | 0.9307 |
| Listeria_monocytogenes_1639_v95                          | Listeria_monocytogenes_1639_v15 | 0.9307 |
| Listeria_monocytogenes_1639_v94                          | Listeria_monocytogenes_1639_v15 | 0.931  |
| Listeria_monocytogenes_1639_v93                          | Listeria_monocytogenes_1639_v15 | 0.9258 |
| Listeria_monocytogenes_1639_v92                          | Listeria_monocytogenes_1639_v15 | 0.931  |
| Listeria_monocytogenes_1639_v91                          | Listeria_monocytogenes_1639_v15 | 0.9338 |
| Listeria_monocytogenes_1639_v90                          | Listeria_monocytogenes_1639_v15 | 0.9199 |
| Listeria_monocytogenes_1639_v8                           | Listeria_monocytogenes_1639_v15 | 0.9146 |
| Listeria_monocytogenes_1639_v89                          | Listeria_monocytogenes_1639_v15 | 0.9357 |
| Listeria_monocytogenes_1639_v88                          | Listeria_monocytogenes_1639_v15 | 0.9226 |
| Listeria_monocytogenes_1639_v87                          | Listeria_monocytogenes_1639_v15 | 0.9265 |
| Listeria_monocytogenes_1639_v86                          | Listeria_monocytogenes_1639_v15 | 0.9262 |
| Listeria_monocytogenes_1639_v85                          | Listeria_monocytogenes_1639_v15 | 0.9294 |
| Listeria_monocytogenes_1639_v84                          | Listeria_monocytogenes_1639_v15 | 0.9232 |
| Listeria_monocytogenes_1639_v83                          | Listeria_monocytogenes_1639_v15 | 0.932  |
| Listeria_monocytogenes_1639_v82                          | Listeria_monocytogenes_1639_v15 | 0.9317 |
| Listeria_monocytogenes_1639_v81                          | Listeria_monocytogenes_1639_v15 | 0.923  |
| Listeria_monocytogenes_1639_v80                          | Listeria_monocytogenes_1639_v15 | 0.9649 |
| Listeria_monocytogenes_1639_v7                           | Listeria_monocytogenes_1639_v15 | 0.9146 |
| Listeria_monocytogenes_1639_v79                          | Listeria_monocytogenes_1639_v15 | 0.9198 |
| Listeria_monocytogenes_1639_v78                          | Listeria_monocytogenes_1639_v15 | 0.9238 |
| Listeria_monocytogenes_1639_v77                          | Listeria_monocytogenes_1639_v15 | 0.9106 |
| Listeria_monocytogenes_1639_v76                          | Listeria_monocytogenes_1639_v15 | 0.9196 |
| Listeria_monocytogenes_1639_v75                          | Listeria_monocytogenes_1639_v15 | 0.9021 |
| Listeria_monocytogenes_1639_v74                          | Listeria_monocytogenes_1639_v15 | 0.9149 |
| Listeria_monocytogenes_1639_v73                          | Listeria_monocytogenes_1639_v15 | 0.9367 |
| Listeria_monocytogenes_1639_v72                          | Listeria_monocytogenes_1639_v15 | 0.9258 |
| Listeria_monocytogenes_1639_v71                          | Listeria_monocytogenes_1639_v15 | 0.9134 |
| Listeria_monocytogenes_1639_v70                          | Listeria_monocytogenes_1639_v15 | 0.9267 |
| Listeria_monocytogenes_1639_v6                           | Listeria_monocytogenes_1639_v15 | 0.9142 |
| Listeria_monocytogenes_1639_v69                          | Listeria_monocytogenes_1639_v15 | 0.9292 |
| Listeria_monocytogenes_1639_v68                          | Listeria_monocytogenes_1639_v15 | 0.9193 |
| Listeria_monocytogenes_1639_v67                          | Listeria_monocytogenes_1639_v15 | 0.9387 |
| Listeria_monocytogenes_1639_v66                          | Listeria_monocytogenes_1639_v15 | 0.9232 |
| Listeria_monocytogenes_1639_v65                          | Listeria_monocytogenes_1639_v15 | 0.9303 |
| Listeria_monocytogenes_1639_v64                          | Listeria_monocytogenes_1639_v15 | 0.9176 |
| Listeria_monocytogenes_1639_v63                          | Listeria_monocytogenes_1639_v15 | 0.9593 |
| Listeria_monocytogenes_1639_v62                          | Listeria_monocytogenes_1639_v15 | 0.9215 |
| Listeria_monocytogenes_1639_v61                          | Listeria_monocytogenes_1639_v15 | 0.9209 |
| Listeria_monocytogenes_1639_v60                          | Listeria_monocytogenes_1639_v15 | 0.9156 |
| Listeria_monocytogenes_1639_v5                           | Listeria_monocytogenes_1639_v15 | 0.956  |
| Listeria_monocytogenes_1639_v59                          | Listeria_monocytogenes_1639_v15 | 0.9265 |
| Listeria_monocytogenes_1639_v58                          | Listeria_monocytogenes_1639_v15 | 0.9313 |
| Listeria_monocytogenes_1639_v57                          | Listeria_monocytogenes_1639_v15 | 0.9375 |
| Listeria_monocytogenes_1639_v56                          | Listeria_monocytogenes_1639_v15 | 0.9225 |
| Listeria_monocytogenes_1639_v55                          | Listeria_monocytogenes_1639_v15 | 0.9316 |
| Listeria_monocytogenes_1639_v54                          | Listeria_monocytogenes_1639_v15 | 0.8974 |
| Listeria_monocytogenes_1639_v53                          | Listeria_monocytogenes_1639_v15 | 0.9083 |
| Listeria_monocytogenes_1639_v52                          | Listeria_monocytogenes_1639_v15 | 0.9341 |
| Listeria_monocytogenes_1639_v51                          | Listeria_monocytogenes_1639_v15 | 0.9331 |
| Listeria_monocytogenes_1639_v50                          | Listeria_monocytogenes_1639_v15 | 0.9182 |
| Listeria_monocytogenes_1639_v4                           | Listeria_monocytogenes_1639_v15 | 0.9695 |
| Listeria_monocytogenes_1639_v49                          | Listeria_monocytogenes_1639_v15 | 0.9183 |
| Listeria_monocytogenes_1639_v48                          | Listeria_monocytogenes_1639_v15 | 0.9251 |
| Listeria_monocytogenes_1639_v47                          | Listeria_monocytogenes_1639_v15 | 0.9172 |
| Listeria_monocytogenes_1639_v46                          | Listeria_monocytogenes_1639_v15 | 0.9117 |
| Listeria_monocytogenes_1639_v45                          | Listeria_monocytogenes_1639_v15 | 0.9173 |

|                                                        |                                  |        |
|--------------------------------------------------------|----------------------------------|--------|
| Listeria_monocytogenes_1639_v44                        | Listeria_monocytogenes_1639_v15  | 0.9193 |
| Listeria_monocytogenes_1639_v43                        | Listeria_monocytogenes_1639_v15  | 0.9193 |
| Listeria_monocytogenes_1639_v42                        | Listeria_monocytogenes_1639_v15  | 0.9014 |
| Listeria_monocytogenes_1639_v41                        | Listeria_monocytogenes_1639_v15  | 0.9125 |
| Listeria_monocytogenes_1639_v40                        | Listeria_monocytogenes_1639_v15  | 0.9262 |
| Listeria_monocytogenes_1639_v3                         | Listeria_monocytogenes_1639_v15  | 0.9702 |
| Listeria_monocytogenes_1639_v39                        | Listeria_monocytogenes_1639_v15  | 0.9375 |
| Listeria_monocytogenes_1639_v38                        | Listeria_monocytogenes_1639_v15  | 0.9155 |
| Listeria_monocytogenes_1639_v37                        | Listeria_monocytogenes_1639_v15  | 0.9311 |
| Listeria_monocytogenes_1639_v36                        | Listeria_monocytogenes_1639_v15  | 0.9207 |
| Listeria_monocytogenes_1639_v35                        | Listeria_monocytogenes_1639_v15  | 0.9206 |
| Listeria_monocytogenes_1639_v34                        | Listeria_monocytogenes_1639_v15  | 0.9163 |
| Listeria_monocytogenes_1639_v33                        | Listeria_monocytogenes_1639_v15  | 0.9645 |
| Listeria_monocytogenes_1639_v32                        | Listeria_monocytogenes_1639_v15  | 0.925  |
| Listeria_monocytogenes_1639_v31                        | Listeria_monocytogenes_1639_v15  | 0.9167 |
| Listeria_monocytogenes_1639_v30                        | Listeria_monocytogenes_1639_v15  | 0.9444 |
| Listeria_monocytogenes_1639_v2                         | Listeria_monocytogenes_1639_v15  | 0.9311 |
| Listeria_monocytogenes_1639_v29                        | Listeria_monocytogenes_1639_v15  | 0.9225 |
| Listeria_monocytogenes_1639_v28                        | Listeria_monocytogenes_1639_v15  | 0.9153 |
| Listeria_monocytogenes_1639_v27                        | Listeria_monocytogenes_1639_v15  | 0.9318 |
| Listeria_monocytogenes_1639_v26                        | Listeria_monocytogenes_1639_v15  | 0.9326 |
| Listeria_monocytogenes_1639_v25                        | Listeria_monocytogenes_1639_v15  | 0.933  |
| Listeria_monocytogenes_1639_v24                        | Listeria_monocytogenes_1639_v15  | 0.9308 |
| Listeria_monocytogenes_1639_v23                        | Listeria_monocytogenes_1639_v15  | 0.9301 |
| Listeria_monocytogenes_1639_v22                        | Listeria_monocytogenes_1639_v15  | 0.9637 |
| Listeria_monocytogenes_1639_v21                        | Listeria_monocytogenes_1639_v15  | 0.932  |
| Listeria_monocytogenes_1639_v20                        | Listeria_monocytogenes_1639_v15  | 0.9445 |
| Listeria_monocytogenes_1639_v1                         | Listeria_monocytogenes_1639_v15  | 0.9206 |
| Listeria_monocytogenes_1639_v19                        | Listeria_monocytogenes_1639_v15  | 0.9438 |
| Listeria_monocytogenes_1639_v198                       | Listeria_monocytogenes_1639_v15  | 0.8788 |
| Listeria_monocytogenes_1639_v197                       | Listeria_monocytogenes_1639_v15  | 0.9147 |
| Listeria_monocytogenes_1639_v196                       | Listeria_monocytogenes_1639_v15  | 0.9076 |
| Listeria_monocytogenes_1639_v195                       | Listeria_monocytogenes_1639_v15  | 0.9125 |
| Listeria_monocytogenes_1639_v194                       | Listeria_monocytogenes_1639_v15  | 0.9119 |
| Listeria_monocytogenes_1639_v193                       | Listeria_monocytogenes_1639_v15  | 0.9119 |
| Listeria_monocytogenes_1639_v192                       | Listeria_monocytogenes_1639_v15  | 0.8775 |
| Listeria_monocytogenes_1639_v191                       | Listeria_monocytogenes_1639_v15  | 0.9193 |
| Listeria_monocytogenes_1639_v190                       | Listeria_monocytogenes_1639_v15  | 0.9206 |
| Listeria_monocytogenes_1639_v18                        | Listeria_monocytogenes_1639_v15  | 0.94   |
| Listeria_monocytogenes_1639_v189                       | Listeria_monocytogenes_1639_v15  | 0.9195 |
| Listeria_monocytogenes_1639_v188                       | Listeria_monocytogenes_1639_v15  | 0.9215 |
| Listeria_monocytogenes_1639_v187                       | Listeria_monocytogenes_1639_v15  | 0.9205 |
| Listeria_monocytogenes_1639_v186                       | Listeria_monocytogenes_1639_v15  | 0.9205 |
| Listeria_monocytogenes_1639_v185                       | Listeria_monocytogenes_1639_v15  | 0.9209 |
| Listeria_monocytogenes_1639_v184                       | Listeria_monocytogenes_1639_v15  | 0.9198 |
| Listeria_monocytogenes_1639_v183                       | Listeria_monocytogenes_1639_v15  | 0.9153 |
| Listeria_monocytogenes_1639_v182                       | Listeria_monocytogenes_1639_v15  | 0.9174 |
| Listeria_monocytogenes_1639_v181                       | Listeria_monocytogenes_1639_v15  | 0.8936 |
| Listeria_monocytogenes_1639_v180                       | Listeria_monocytogenes_1639_v15  | 0.8936 |
| Listeria_monocytogenes_1639_v17                        | Listeria_monocytogenes_1639_v15  | 0.9403 |
| Listeria_monocytogenes_1639_v179                       | Listeria_monocytogenes_1639_v15  | 0.9106 |
| Listeria_monocytogenes_1639_v178                       | Listeria_monocytogenes_1639_v15  | 0.9206 |
| Listeria_monocytogenes_1639_v177                       | Listeria_monocytogenes_1639_v15  | 0.9304 |
| Listeria_monocytogenes_1639_v176                       | Listeria_monocytogenes_1639_v15  | 0.9079 |
| Listeria_monocytogenes_1639_v175                       | Listeria_monocytogenes_1639_v15  | 0.9272 |
| Listeria_monocytogenes_1639_v174                       | Listeria_monocytogenes_1639_v15  | 0.9207 |
| Listeria_monocytogenes_1639_v173                       | Listeria_monocytogenes_1639_v15  | 0.9359 |
| Listeria_monocytogenes_1639_v172                       | Listeria_monocytogenes_1639_v15  | 0.9077 |
| Listeria_monocytogenes_1639_v171                       | Listeria_monocytogenes_1639_v15  | 0.9243 |
| Listeria_monocytogenes_1639_v170                       | Listeria_monocytogenes_1639_v15  | 0.917  |
| Listeria_monocytogenes_1639_v16                        | Listeria_monocytogenes_1639_v15  | 0.9137 |
| Listeria_monocytogenes_1639_v169                       | Listeria_monocytogenes_1639_v15  | 0.9293 |
| Listeria_monocytogenes_1639_v168                       | Listeria_monocytogenes_1639_v15  | 0.9133 |
| Listeria_monocytogenes_1639_v167                       | Listeria_monocytogenes_1639_v15  | 0.914  |
| Listeria_monocytogenes_1639_v166                       | Listeria_monocytogenes_1639_v15  | 0.9137 |
| Listeria_monocytogenes_1639_v165                       | Listeria_monocytogenes_1639_v15  | 0.929  |
| Listeria_monocytogenes_1639_v164                       | Listeria_monocytogenes_1639_v15  | 0.9294 |
| Listeria_monocytogenes_1639_v163                       | Listeria_monocytogenes_1639_v15  | 0.9362 |
| Listeria_monocytogenes_1639_v162                       | Listeria_monocytogenes_1639_v15  | 0.9294 |
| Listeria_monocytogenes_1639_v161                       | Listeria_monocytogenes_1639_v15  | 0.9295 |
| Listeria_monocytogenes_1639_v160                       | Listeria_monocytogenes_1639_v15  | 0.9292 |
| Listeria_monocytogenes_1639_v15                        | Listeria_monocytogenes_1639_v15  | 0.0764 |
| Listeria_welshimeri_1643                               | Listeria_monocytogenes_1639_v160 | 0.8879 |
| Listeria_welshimeri_serovar_6b_str_SLCC5334_386043     | Listeria_monocytogenes_1639_v160 | 0.8872 |
| Listeria_seeligeri_serovar_1_2b_str_SLCC3954_683837    | Listeria_monocytogenes_1639_v160 | 0.8886 |
| Listeria_seeligeri_FSL_S4-171_702452                   | Listeria_monocytogenes_1639_v160 | 0.8303 |
| Listeria_seeligeri_FSL_N1-067_702453                   | Listeria_monocytogenes_1639_v160 | 0.8319 |
| Listeria_seeligeri_1640_v1                             | Listeria_monocytogenes_1639_v160 | 0.8986 |
| Listeria_seeligeri_1640                                | Listeria_monocytogenes_1639_v160 | 0.8877 |
| Listeria_monocytogenes_WSLC1042_1457188                | Listeria_monocytogenes_1639_v160 | 0.9908 |
| Listeria_monocytogenes_WSLC1001_1457187                | Listeria_monocytogenes_1639_v160 | 0.9321 |
| Listeria_monocytogenes_SLCC7179_879090                 | Listeria_monocytogenes_1639_v160 | 0.9422 |
| Listeria_monocytogenes_SLCC5850_882096                 | Listeria_monocytogenes_1639_v160 | 0.9368 |
| Listeria_monocytogenes_SLCC2755_932919                 | Listeria_monocytogenes_1639_v160 | 0.9517 |
| Listeria_monocytogenes_SLCC2540_879089                 | Listeria_monocytogenes_1639_v160 | 0.9546 |
| Listeria_monocytogenes_SLCC2479_882020                 | Listeria_monocytogenes_1639_v160 | 0.9314 |
| Listeria_monocytogenes_SLCC2378_879088                 | Listeria_monocytogenes_1639_v160 | 0.9919 |
| Listeria_monocytogenes_SLCC2376_882097                 | Listeria_monocytogenes_1639_v160 | 0.9465 |
| Listeria_monocytogenes_SLCC2372_932920                 | Listeria_monocytogenes_1639_v160 | 0.9241 |
| Listeria_monocytogenes_serotype_4b_str_LL195_1230340   | Listeria_monocytogenes_1639_v160 | 0.9985 |
| Listeria_monocytogenes_serotype_4b_str_LIS0087_1134669 | Listeria_monocytogenes_1639_v160 | 0.9122 |



[illegible]





[illegible]

|                                                          |                                  |        |
|----------------------------------------------------------|----------------------------------|--------|
| Listeria_monocytogenes_1639_v195                         | Listeria_monocytogenes_1639_v161 | 0.9495 |
| Listeria_monocytogenes_1639_v194                         | Listeria_monocytogenes_1639_v161 | 0.9473 |
| Listeria_monocytogenes_1639_v193                         | Listeria_monocytogenes_1639_v161 | 0.9473 |
| Listeria_monocytogenes_1639_v192                         | Listeria_monocytogenes_1639_v161 | 0.915  |
| Listeria_monocytogenes_1639_v191                         | Listeria_monocytogenes_1639_v161 | 0.9525 |
| Listeria_monocytogenes_1639_v190                         | Listeria_monocytogenes_1639_v161 | 0.9491 |
| Listeria_monocytogenes_1639_v18                          | Listeria_monocytogenes_1639_v161 | 0.9458 |
| Listeria_monocytogenes_1639_v189                         | Listeria_monocytogenes_1639_v161 | 0.9483 |
| Listeria_monocytogenes_1639_v188                         | Listeria_monocytogenes_1639_v161 | 0.9509 |
| Listeria_monocytogenes_1639_v187                         | Listeria_monocytogenes_1639_v161 | 0.9491 |
| Listeria_monocytogenes_1639_v186                         | Listeria_monocytogenes_1639_v161 | 0.9495 |
| Listeria_monocytogenes_1639_v185                         | Listeria_monocytogenes_1639_v161 | 0.9495 |
| Listeria_monocytogenes_1639_v184                         | Listeria_monocytogenes_1639_v161 | 0.9483 |
| Listeria_monocytogenes_1639_v183                         | Listeria_monocytogenes_1639_v161 | 0.9487 |
| Listeria_monocytogenes_1639_v182                         | Listeria_monocytogenes_1639_v161 | 0.9509 |
| Listeria_monocytogenes_1639_v181                         | Listeria_monocytogenes_1639_v161 | 0.9388 |
| Listeria_monocytogenes_1639_v180                         | Listeria_monocytogenes_1639_v161 | 0.9388 |
| Listeria_monocytogenes_1639_v17                          | Listeria_monocytogenes_1639_v161 | 0.9461 |
| Listeria_monocytogenes_1639_v179                         | Listeria_monocytogenes_1639_v161 | 0.9346 |
| Listeria_monocytogenes_1639_v178                         | Listeria_monocytogenes_1639_v161 | 0.951  |
| Listeria_monocytogenes_1639_v177                         | Listeria_monocytogenes_1639_v161 | 0.9749 |
| Listeria_monocytogenes_1639_v176                         | Listeria_monocytogenes_1639_v161 | 0.9454 |
| Listeria_monocytogenes_1639_v175                         | Listeria_monocytogenes_1639_v161 | 0.9422 |
| Listeria_monocytogenes_1639_v174                         | Listeria_monocytogenes_1639_v161 | 0.9519 |
| Listeria_monocytogenes_1639_v173                         | Listeria_monocytogenes_1639_v161 | 0.974  |
| Listeria_monocytogenes_1639_v172                         | Listeria_monocytogenes_1639_v161 | 0.9475 |
| Listeria_monocytogenes_1639_v171                         | Listeria_monocytogenes_1639_v161 | 0.9342 |
| Listeria_monocytogenes_1639_v170                         | Listeria_monocytogenes_1639_v161 | 0.9425 |
| Listeria_monocytogenes_1639_v16                          | Listeria_monocytogenes_1639_v161 | 0.9095 |
| Listeria_monocytogenes_1639_v169                         | Listeria_monocytogenes_1639_v161 | 0.9445 |
| Listeria_monocytogenes_1639_v168                         | Listeria_monocytogenes_1639_v161 | 0.9453 |
| Listeria_monocytogenes_1639_v167                         | Listeria_monocytogenes_1639_v161 | 0.9367 |
| Listeria_monocytogenes_1639_v166                         | Listeria_monocytogenes_1639_v161 | 0.9457 |
| Listeria_monocytogenes_1639_v165                         | Listeria_monocytogenes_1639_v161 | 0.9441 |
| Listeria_monocytogenes_1639_v164                         | Listeria_monocytogenes_1639_v161 | 0.9981 |
| Listeria_monocytogenes_1639_v163                         | Listeria_monocytogenes_1639_v161 | 0.9649 |
| Listeria_monocytogenes_1639_v162                         | Listeria_monocytogenes_1639_v161 | 0.9981 |
| Listeria_monocytogenes_1639_v161                         | Listeria_monocytogenes_1639_v161 | 0.0642 |
| Listeria_welshimeri_1643                                 | Listeria_monocytogenes_1639_v162 | 0.8882 |
| Listeria_welshimeri_serovar_6b_str_SLCC5334_386043       | Listeria_monocytogenes_1639_v162 | 0.8879 |
| Listeria_seeligeri_serovar_1_2b_str_SLCC3954_683837      | Listeria_monocytogenes_1639_v162 | 0.8897 |
| Listeria_seeligeri_FSL_S4-171_702452                     | Listeria_monocytogenes_1639_v162 | 0.829  |
| Listeria_seeligeri_FSL_N1-067_702453                     | Listeria_monocytogenes_1639_v162 | 0.8306 |
| Listeria_seeligeri_1640_v1                               | Listeria_monocytogenes_1639_v162 | 0.8973 |
| Listeria_seeligeri_1640                                  | Listeria_monocytogenes_1639_v162 | 0.8861 |
| Listeria_monocytogenes_WSLC1042_1457188                  | Listeria_monocytogenes_1639_v162 | 0.9908 |
| Listeria_monocytogenes_WSLC1001_1457187                  | Listeria_monocytogenes_1639_v162 | 0.9309 |
| Listeria_monocytogenes_SLCC7179_879090                   | Listeria_monocytogenes_1639_v162 | 0.941  |
| Listeria_monocytogenes_SLCC5850_882096                   | Listeria_monocytogenes_1639_v162 | 0.9356 |
| Listeria_monocytogenes_SLCC2755_932919                   | Listeria_monocytogenes_1639_v162 | 0.9506 |
| Listeria_monocytogenes_SLCC2540_879089                   | Listeria_monocytogenes_1639_v162 | 0.9534 |
| Listeria_monocytogenes_SLCC2479_882020                   | Listeria_monocytogenes_1639_v162 | 0.9306 |
| Listeria_monocytogenes_SLCC2378_879088                   | Listeria_monocytogenes_1639_v162 | 0.9919 |
| Listeria_monocytogenes_SLCC2376_882097                   | Listeria_monocytogenes_1639_v162 | 0.9476 |
| Listeria_monocytogenes_SLCC2372_932920                   | Listeria_monocytogenes_1639_v162 | 0.9233 |
| Listeria_monocytogenes_serotype_4b_str_LL195_1230340     | Listeria_monocytogenes_1639_v162 | 0.9985 |
| Listeria_monocytogenes_serotype_4b_str_LIS0087_1134669   | Listeria_monocytogenes_1639_v162 | 0.9113 |
| Listeria_monocytogenes_serotype_4b_str_F2365_265669      | Listeria_monocytogenes_1639_v162 | 0.9985 |
| Listeria_monocytogenes_serotype_4b_str_CLIP_80459_568819 | Listeria_monocytogenes_1639_v162 | 0.9783 |
| Listeria_monocytogenes_serotype_4b_str_81-0861_1196161   | Listeria_monocytogenes_1639_v162 | 0.9803 |
| Listeria_monocytogenes_serotype_4b_str_81-0592_1196160   | Listeria_monocytogenes_1639_v162 | 0.9814 |
| Listeria_monocytogenes_serotype_4b_str_81-0558_1196159   | Listeria_monocytogenes_1639_v162 | 0.981  |
| Listeria_monocytogenes_serotype_4b_str_10-0809_1196162   | Listeria_monocytogenes_1639_v162 | 0.9818 |
| Listeria_monocytogenes_serotype_4b_str_02-6680_1196175   | Listeria_monocytogenes_1639_v162 | 0.9788 |
| Listeria_monocytogenes_serotype_4b_str_02-6679_1196174   | Listeria_monocytogenes_1639_v162 | 0.9788 |
| Listeria_monocytogenes_serotype_4b_str_02-1792_1196173   | Listeria_monocytogenes_1639_v162 | 0.9818 |
| Listeria_monocytogenes_serotype_4b_str_02-1289_1196172   | Listeria_monocytogenes_1639_v162 | 0.9818 |
| Listeria_monocytogenes_serotype_4b_str_02-1103_1196171   | Listeria_monocytogenes_1639_v162 | 0.9818 |
| Listeria_monocytogenes_serotype_3c_str_10-5027_1196195   | Listeria_monocytogenes_1639_v162 | 0.9298 |
| Listeria_monocytogenes_serotype_1_2c_str_10-5026_1196194 | Listeria_monocytogenes_1639_v162 | 0.9306 |
| Listeria_monocytogenes_serotype_1_2c_str_10-5025_1196193 | Listeria_monocytogenes_1639_v162 | 0.9306 |
| Listeria_monocytogenes_serotype_1_2b_str_10-0811_1196164 | Listeria_monocytogenes_1639_v162 | 0.9437 |
| Listeria_monocytogenes_serotype_1_2b_str_10-0810_1196163 | Listeria_monocytogenes_1639_v162 | 0.9437 |
| Listeria_monocytogenes_serotype_1_2a_str_99-6370_1196179 | Listeria_monocytogenes_1639_v162 | 0.9165 |
| Listeria_monocytogenes_serotype_1_2a_str_98-2035_1196178 | Listeria_monocytogenes_1639_v162 | 0.9165 |
| Listeria_monocytogenes_serotype_1_2a_str_95-0093_1196177 | Listeria_monocytogenes_1639_v162 | 0.922  |
| Listeria_monocytogenes_serotype_1_2a_str_88-0478_1196176 | Listeria_monocytogenes_1639_v162 | 0.9209 |
| Listeria_monocytogenes_serotype_1_2a_str_10-5024_1196192 | Listeria_monocytogenes_1639_v162 | 0.922  |
| Listeria_monocytogenes_serotype_1_2a_str_10-4758_1196168 | Listeria_monocytogenes_1639_v162 | 0.9399 |
| Listeria_monocytogenes_serotype_1_2a_str_10-4754_1196167 | Listeria_monocytogenes_1639_v162 | 0.9402 |
| Listeria_monocytogenes_serotype_1_2a_str_10-1321_1196191 | Listeria_monocytogenes_1639_v162 | 0.922  |
| Listeria_monocytogenes_serotype_1_2a_str_10-1047_1196190 | Listeria_monocytogenes_1639_v162 | 0.9227 |
| Listeria_monocytogenes_serotype_1_2a_str_10-1046_1196189 | Listeria_monocytogenes_1639_v162 | 0.9227 |
| Listeria_monocytogenes_serotype_1_2a_str_10-0934_1196170 | Listeria_monocytogenes_1639_v162 | 0.948  |
| Listeria_monocytogenes_serotype_1_2a_str_10-0933_1196169 | Listeria_monocytogenes_1639_v162 | 0.948  |
| Listeria_monocytogenes_serotype_1_2a_str_10-0815_1196188 | Listeria_monocytogenes_1639_v162 | 0.9179 |
| Listeria_monocytogenes_serotype_1_2a_str_10-0814_1196187 | Listeria_monocytogenes_1639_v162 | 0.9224 |
| Listeria_monocytogenes_serotype_1_2a_str_10-0813_1196166 | Listeria_monocytogenes_1639_v162 | 0.9284 |
| Listeria_monocytogenes_serotype_1_2a_str_10-0812_1196165 | Listeria_monocytogenes_1639_v162 | 0.9284 |
| Listeria_monocytogenes_serotype_1_2a_str_08-7669_1196186 | Listeria_monocytogenes_1639_v162 | 0.9315 |
| Listeria_monocytogenes_serotype_1_2a_str_08-7374_1196185 | Listeria_monocytogenes_1639_v162 | 0.922  |

|                                                          |                                  |        |
|----------------------------------------------------------|----------------------------------|--------|
| Listeria_monocytogenes_serotype_1_2a_str_08-6997_1196184 | Listeria_monocytogenes_1639_v162 | 0.9179 |
| Listeria_monocytogenes_serotype_1_2a_str_08-6569_1196183 | Listeria_monocytogenes_1639_v162 | 0.9179 |
| Listeria_monocytogenes_serotype_1_2a_str_08-6056_1196182 | Listeria_monocytogenes_1639_v162 | 0.9179 |
| Listeria_monocytogenes_serotype_1_2a_str_04-5457_1196181 | Listeria_monocytogenes_1639_v162 | 0.922  |
| Listeria_monocytogenes_serotype_1_2a_str_02-5993_1196180 | Listeria_monocytogenes_1639_v162 | 0.922  |
| Listeria_monocytogenes_R479a_1437838                     | Listeria_monocytogenes_1639_v162 | 0.9213 |
| Listeria_monocytogenes_N53-1_1234142                     | Listeria_monocytogenes_1639_v162 | 0.8961 |
| Listeria_monocytogenes_M7_1030009                        | Listeria_monocytogenes_1639_v162 | 0.9109 |
| Listeria_monocytogenes_LO28_393132                       | Listeria_monocytogenes_1639_v162 | 0.9292 |
| Listeria_monocytogenes_L99_563174                        | Listeria_monocytogenes_1639_v162 | 0.9112 |
| Listeria_monocytogenes_L312_882094                       | Listeria_monocytogenes_1639_v162 | 0.9787 |
| Listeria_monocytogenes_J1816_930781                      | Listeria_monocytogenes_1639_v162 | 0.9542 |
| Listeria_monocytogenes_J1-220_930782                     | Listeria_monocytogenes_1639_v162 | 0.9563 |
| Listeria_monocytogenes_J0161_393130                      | Listeria_monocytogenes_1639_v162 | 0.9284 |
| Listeria_monocytogenes_HCC23_552536                      | Listeria_monocytogenes_1639_v162 | 0.9105 |
| Listeria_monocytogenes_FSL_R2-561_393126                 | Listeria_monocytogenes_1639_v162 | 0.9292 |
| Listeria_monocytogenes_FSL_J1-208_393119                 | Listeria_monocytogenes_1639_v162 | 0.924  |
| Listeria_monocytogenes_FSL_J1-175_393118                 | Listeria_monocytogenes_1639_v162 | 0.9582 |
| Listeria_monocytogenes_Finland_1998_393127               | Listeria_monocytogenes_1639_v162 | 0.948  |
| Listeria_monocytogenes_EGD-e_169963_v1                   | Listeria_monocytogenes_1639_v162 | 0.9384 |
| Listeria_monocytogenes_EGD-e_169963                      | Listeria_monocytogenes_1639_v162 | 0.9388 |
| Listeria_monocytogenes_EGD_1334565                       | Listeria_monocytogenes_1639_v162 | 0.9363 |
| Listeria_monocytogenes_CFSAN002349_1299895               | Listeria_monocytogenes_1639_v162 | 0.978  |
| Listeria_monocytogenes_ATCC_19117_882095_v1              | Listeria_monocytogenes_1639_v162 | 0.9769 |
| Listeria_monocytogenes_ATCC_19117_882095                 | Listeria_monocytogenes_1639_v162 | 0.9765 |
| Listeria_monocytogenes_6179_1288295                      | Listeria_monocytogenes_1639_v162 | 0.9134 |
| Listeria_monocytogenes_1639_v9                           | Listeria_monocytogenes_1639_v162 | 0.9285 |
| Listeria_monocytogenes_1639_v99                          | Listeria_monocytogenes_1639_v162 | 0.9554 |
| Listeria_monocytogenes_1639_v98                          | Listeria_monocytogenes_1639_v162 | 0.9249 |
| Listeria_monocytogenes_1639_v97                          | Listeria_monocytogenes_1639_v162 | 0.9695 |
| Listeria_monocytogenes_1639_v96                          | Listeria_monocytogenes_1639_v162 | 0.9546 |
| Listeria_monocytogenes_1639_v95                          | Listeria_monocytogenes_1639_v162 | 0.9547 |
| Listeria_monocytogenes_1639_v94                          | Listeria_monocytogenes_1639_v162 | 0.955  |
| Listeria_monocytogenes_1639_v93                          | Listeria_monocytogenes_1639_v162 | 0.928  |
| Listeria_monocytogenes_1639_v92                          | Listeria_monocytogenes_1639_v162 | 0.955  |
| Listeria_monocytogenes_1639_v91                          | Listeria_monocytogenes_1639_v162 | 0.9777 |
| Listeria_monocytogenes_1639_v90                          | Listeria_monocytogenes_1639_v162 | 0.9249 |
| Listeria_monocytogenes_1639_v8                           | Listeria_monocytogenes_1639_v162 | 0.9107 |
| Listeria_monocytogenes_1639_v89                          | Listeria_monocytogenes_1639_v162 | 0.9655 |
| Listeria_monocytogenes_1639_v88                          | Listeria_monocytogenes_1639_v162 | 0.9285 |
| Listeria_monocytogenes_1639_v87                          | Listeria_monocytogenes_1639_v162 | 0.9239 |
| Listeria_monocytogenes_1639_v86                          | Listeria_monocytogenes_1639_v162 | 0.9235 |
| Listeria_monocytogenes_1639_v85                          | Listeria_monocytogenes_1639_v162 | 0.9795 |
| Listeria_monocytogenes_1639_v84                          | Listeria_monocytogenes_1639_v162 | 0.9325 |
| Listeria_monocytogenes_1639_v83                          | Listeria_monocytogenes_1639_v162 | 0.9654 |
| Listeria_monocytogenes_1639_v82                          | Listeria_monocytogenes_1639_v162 | 0.9646 |
| Listeria_monocytogenes_1639_v81                          | Listeria_monocytogenes_1639_v162 | 0.9278 |
| Listeria_monocytogenes_1639_v80                          | Listeria_monocytogenes_1639_v162 | 0.9493 |
| Listeria_monocytogenes_1639_v7                           | Listeria_monocytogenes_1639_v162 | 0.9107 |
| Listeria_monocytogenes_1639_v79                          | Listeria_monocytogenes_1639_v162 | 0.926  |
| Listeria_monocytogenes_1639_v78                          | Listeria_monocytogenes_1639_v162 | 0.9271 |
| Listeria_monocytogenes_1639_v77                          | Listeria_monocytogenes_1639_v162 | 0.9317 |
| Listeria_monocytogenes_1639_v76                          | Listeria_monocytogenes_1639_v162 | 0.9238 |
| Listeria_monocytogenes_1639_v75                          | Listeria_monocytogenes_1639_v162 | 0.9112 |
| Listeria_monocytogenes_1639_v74                          | Listeria_monocytogenes_1639_v162 | 0.9228 |
| Listeria_monocytogenes_1639_v73                          | Listeria_monocytogenes_1639_v162 | 0.9243 |
| Listeria_monocytogenes_1639_v72                          | Listeria_monocytogenes_1639_v162 | 0.9638 |
| Listeria_monocytogenes_1639_v71                          | Listeria_monocytogenes_1639_v162 | 0.9117 |
| Listeria_monocytogenes_1639_v70                          | Listeria_monocytogenes_1639_v162 | 0.9267 |
| Listeria_monocytogenes_1639_v6                           | Listeria_monocytogenes_1639_v162 | 0.9104 |
| Listeria_monocytogenes_1639_v69                          | Listeria_monocytogenes_1639_v162 | 0.9814 |
| Listeria_monocytogenes_1639_v68                          | Listeria_monocytogenes_1639_v162 | 0.9327 |
| Listeria_monocytogenes_1639_v67                          | Listeria_monocytogenes_1639_v162 | 0.9487 |
| Listeria_monocytogenes_1639_v66                          | Listeria_monocytogenes_1639_v162 | 0.9365 |
| Listeria_monocytogenes_1639_v65                          | Listeria_monocytogenes_1639_v162 | 0.9252 |
| Listeria_monocytogenes_1639_v64                          | Listeria_monocytogenes_1639_v162 | 0.9298 |
| Listeria_monocytogenes_1639_v63                          | Listeria_monocytogenes_1639_v162 | 0.9444 |
| Listeria_monocytogenes_1639_v62                          | Listeria_monocytogenes_1639_v162 | 0.9235 |
| Listeria_monocytogenes_1639_v61                          | Listeria_monocytogenes_1639_v162 | 0.9248 |
| Listeria_monocytogenes_1639_v60                          | Listeria_monocytogenes_1639_v162 | 0.9304 |
| Listeria_monocytogenes_1639_v5                           | Listeria_monocytogenes_1639_v162 | 0.9095 |
| Listeria_monocytogenes_1639_v59                          | Listeria_monocytogenes_1639_v162 | 0.9657 |
| Listeria_monocytogenes_1639_v58                          | Listeria_monocytogenes_1639_v162 | 0.9726 |
| Listeria_monocytogenes_1639_v57                          | Listeria_monocytogenes_1639_v162 | 0.9514 |
| Listeria_monocytogenes_1639_v56                          | Listeria_monocytogenes_1639_v162 | 0.9657 |
| Listeria_monocytogenes_1639_v55                          | Listeria_monocytogenes_1639_v162 | 0.9471 |
| Listeria_monocytogenes_1639_v54                          | Listeria_monocytogenes_1639_v162 | 0.9279 |
| Listeria_monocytogenes_1639_v53                          | Listeria_monocytogenes_1639_v162 | 0.9326 |
| Listeria_monocytogenes_1639_v52                          | Listeria_monocytogenes_1639_v162 | 0.9624 |
| Listeria_monocytogenes_1639_v51                          | Listeria_monocytogenes_1639_v162 | 0.9595 |
| Listeria_monocytogenes_1639_v50                          | Listeria_monocytogenes_1639_v162 | 0.9213 |
| Listeria_monocytogenes_1639_v4                           | Listeria_monocytogenes_1639_v162 | 0.9229 |
| Listeria_monocytogenes_1639_v49                          | Listeria_monocytogenes_1639_v162 | 0.9799 |
| Listeria_monocytogenes_1639_v48                          | Listeria_monocytogenes_1639_v162 | 0.925  |
| Listeria_monocytogenes_1639_v47                          | Listeria_monocytogenes_1639_v162 | 0.9217 |
| Listeria_monocytogenes_1639_v46                          | Listeria_monocytogenes_1639_v162 | 0.932  |
| Listeria_monocytogenes_1639_v45                          | Listeria_monocytogenes_1639_v162 | 0.9128 |
| Listeria_monocytogenes_1639_v44                          | Listeria_monocytogenes_1639_v162 | 0.922  |
| Listeria_monocytogenes_1639_v43                          | Listeria_monocytogenes_1639_v162 | 0.922  |
| Listeria_monocytogenes_1639_v42                          | Listeria_monocytogenes_1639_v162 | 0.9176 |
| Listeria_monocytogenes_1639_v41                          | Listeria_monocytogenes_1639_v162 | 0.903  |

|                                                          |                                  |        |
|----------------------------------------------------------|----------------------------------|--------|
| Listeria_monocytogenes_1639_v40                          | Listeria_monocytogenes_1639_v162 | 0.9295 |
| Listeria_monocytogenes_1639_v3                           | Listeria_monocytogenes_1639_v162 | 0.9233 |
| Listeria_monocytogenes_1639_v39                          | Listeria_monocytogenes_1639_v162 | 0.9451 |
| Listeria_monocytogenes_1639_v38                          | Listeria_monocytogenes_1639_v162 | 0.9264 |
| Listeria_monocytogenes_1639_v37                          | Listeria_monocytogenes_1639_v162 | 0.9219 |
| Listeria_monocytogenes_1639_v36                          | Listeria_monocytogenes_1639_v162 | 0.9194 |
| Listeria_monocytogenes_1639_v35                          | Listeria_monocytogenes_1639_v162 | 0.9302 |
| Listeria_monocytogenes_1639_v34                          | Listeria_monocytogenes_1639_v162 | 0.9246 |
| Listeria_monocytogenes_1639_v33                          | Listeria_monocytogenes_1639_v162 | 0.9437 |
| Listeria_monocytogenes_1639_v32                          | Listeria_monocytogenes_1639_v162 | 0.9209 |
| Listeria_monocytogenes_1639_v31                          | Listeria_monocytogenes_1639_v162 | 0.925  |
| Listeria_monocytogenes_1639_v30                          | Listeria_monocytogenes_1639_v162 | 0.9436 |
| Listeria_monocytogenes_1639_v2                           | Listeria_monocytogenes_1639_v162 | 0.9077 |
| Listeria_monocytogenes_1639_v29                          | Listeria_monocytogenes_1639_v162 | 0.916  |
| Listeria_monocytogenes_1639_v28                          | Listeria_monocytogenes_1639_v162 | 0.9205 |
| Listeria_monocytogenes_1639_v27                          | Listeria_monocytogenes_1639_v162 | 0.9113 |
| Listeria_monocytogenes_1639_v26                          | Listeria_monocytogenes_1639_v162 | 0.9109 |
| Listeria_monocytogenes_1639_v25                          | Listeria_monocytogenes_1639_v162 | 0.9109 |
| Listeria_monocytogenes_1639_v24                          | Listeria_monocytogenes_1639_v162 | 0.9563 |
| Listeria_monocytogenes_1639_v23                          | Listeria_monocytogenes_1639_v162 | 0.9559 |
| Listeria_monocytogenes_1639_v22                          | Listeria_monocytogenes_1639_v162 | 0.9459 |
| Listeria_monocytogenes_1639_v21                          | Listeria_monocytogenes_1639_v162 | 0.9559 |
| Listeria_monocytogenes_1639_v20                          | Listeria_monocytogenes_1639_v162 | 0.9381 |
| Listeria_monocytogenes_1639_v1                           | Listeria_monocytogenes_1639_v162 | 0.9074 |
| Listeria_monocytogenes_1639_v19                          | Listeria_monocytogenes_1639_v162 | 0.9377 |
| Listeria_monocytogenes_1639_v198                         | Listeria_monocytogenes_1639_v162 | 0.8988 |
| Listeria_monocytogenes_1639_v197                         | Listeria_monocytogenes_1639_v162 | 0.9259 |
| Listeria_monocytogenes_1639_v196                         | Listeria_monocytogenes_1639_v162 | 0.9188 |
| Listeria_monocytogenes_1639_v195                         | Listeria_monocytogenes_1639_v162 | 0.9503 |
| Listeria_monocytogenes_1639_v194                         | Listeria_monocytogenes_1639_v162 | 0.948  |
| Listeria_monocytogenes_1639_v193                         | Listeria_monocytogenes_1639_v162 | 0.948  |
| Listeria_monocytogenes_1639_v192                         | Listeria_monocytogenes_1639_v162 | 0.9138 |
| Listeria_monocytogenes_1639_v191                         | Listeria_monocytogenes_1639_v162 | 0.9513 |
| Listeria_monocytogenes_1639_v190                         | Listeria_monocytogenes_1639_v162 | 0.9479 |
| Listeria_monocytogenes_1639_v18                          | Listeria_monocytogenes_1639_v162 | 0.9454 |
| Listeria_monocytogenes_1639_v189                         | Listeria_monocytogenes_1639_v162 | 0.9471 |
| Listeria_monocytogenes_1639_v188                         | Listeria_monocytogenes_1639_v162 | 0.9494 |
| Listeria_monocytogenes_1639_v187                         | Listeria_monocytogenes_1639_v162 | 0.9479 |
| Listeria_monocytogenes_1639_v186                         | Listeria_monocytogenes_1639_v162 | 0.9483 |
| Listeria_monocytogenes_1639_v185                         | Listeria_monocytogenes_1639_v162 | 0.9483 |
| Listeria_monocytogenes_1639_v184                         | Listeria_monocytogenes_1639_v162 | 0.9471 |
| Listeria_monocytogenes_1639_v183                         | Listeria_monocytogenes_1639_v162 | 0.9494 |
| Listeria_monocytogenes_1639_v182                         | Listeria_monocytogenes_1639_v162 | 0.9517 |
| Listeria_monocytogenes_1639_v181                         | Listeria_monocytogenes_1639_v162 | 0.9377 |
| Listeria_monocytogenes_1639_v180                         | Listeria_monocytogenes_1639_v162 | 0.9377 |
| Listeria_monocytogenes_1639_v17                          | Listeria_monocytogenes_1639_v162 | 0.9458 |
| Listeria_monocytogenes_1639_v179                         | Listeria_monocytogenes_1639_v162 | 0.9357 |
| Listeria_monocytogenes_1639_v178                         | Listeria_monocytogenes_1639_v162 | 0.9522 |
| Listeria_monocytogenes_1639_v177                         | Listeria_monocytogenes_1639_v162 | 0.9745 |
| Listeria_monocytogenes_1639_v176                         | Listeria_monocytogenes_1639_v162 | 0.9462 |
| Listeria_monocytogenes_1639_v175                         | Listeria_monocytogenes_1639_v162 | 0.9411 |
| Listeria_monocytogenes_1639_v174                         | Listeria_monocytogenes_1639_v162 | 0.9507 |
| Listeria_monocytogenes_1639_v173                         | Listeria_monocytogenes_1639_v162 | 0.9728 |
| Listeria_monocytogenes_1639_v172                         | Listeria_monocytogenes_1639_v162 | 0.9463 |
| Listeria_monocytogenes_1639_v171                         | Listeria_monocytogenes_1639_v162 | 0.933  |
| Listeria_monocytogenes_1639_v170                         | Listeria_monocytogenes_1639_v162 | 0.9413 |
| Listeria_monocytogenes_1639_v16                          | Listeria_monocytogenes_1639_v162 | 0.9084 |
| Listeria_monocytogenes_1639_v169                         | Listeria_monocytogenes_1639_v162 | 0.9433 |
| Listeria_monocytogenes_1639_v168                         | Listeria_monocytogenes_1639_v162 | 0.9461 |
| Listeria_monocytogenes_1639_v167                         | Listeria_monocytogenes_1639_v162 | 0.9378 |
| Listeria_monocytogenes_1639_v166                         | Listeria_monocytogenes_1639_v162 | 0.9465 |
| Listeria_monocytogenes_1639_v165                         | Listeria_monocytogenes_1639_v162 | 0.9429 |
| Listeria_monocytogenes_1639_v164                         | Listeria_monocytogenes_1639_v162 | 1      |
| Listeria_monocytogenes_1639_v163                         | Listeria_monocytogenes_1639_v162 | 0.9637 |
| Listeria_monocytogenes_1639_v162                         | Listeria_monocytogenes_1639_v162 | 0.0642 |
| Listeria_welshimeri_1643                                 | Listeria_monocytogenes_1639_v163 | 0.881  |
| Listeria_welshimeri_serovar_6b_str_SLCC5334_386043       | Listeria_monocytogenes_1639_v163 | 0.8803 |
| Listeria_seeligeri_serovar_1_2b_str_SLCC3954_683837      | Listeria_monocytogenes_1639_v163 | 0.8961 |
| Listeria_seeligeri_FSL_S4-171_702452                     | Listeria_monocytogenes_1639_v163 | 0.8284 |
| Listeria_seeligeri_FSL_N1-067_702453                     | Listeria_monocytogenes_1639_v163 | 0.842  |
| Listeria_seeligeri_1640_v1                               | Listeria_monocytogenes_1639_v163 | 0.8994 |
| Listeria_seeligeri_1640                                  | Listeria_monocytogenes_1639_v163 | 0.8889 |
| Listeria_monocytogenes_WSLC1042_1457188                  | Listeria_monocytogenes_1639_v163 | 0.9575 |
| Listeria_monocytogenes_WSLC1001_1457187                  | Listeria_monocytogenes_1639_v163 | 0.9405 |
| Listeria_monocytogenes_SLCC7179_879090                   | Listeria_monocytogenes_1639_v163 | 0.9488 |
| Listeria_monocytogenes_SLCC5850_882096                   | Listeria_monocytogenes_1639_v163 | 0.9452 |
| Listeria_monocytogenes_SLCC2755_932919                   | Listeria_monocytogenes_1639_v163 | 0.9654 |
| Listeria_monocytogenes_SLCC2540_879089                   | Listeria_monocytogenes_1639_v163 | 0.9573 |
| Listeria_monocytogenes_SLCC2479_882020                   | Listeria_monocytogenes_1639_v163 | 0.9375 |
| Listeria_monocytogenes_SLCC2378_879088                   | Listeria_monocytogenes_1639_v163 | 0.9586 |
| Listeria_monocytogenes_SLCC2376_882097                   | Listeria_monocytogenes_1639_v163 | 0.9469 |
| Listeria_monocytogenes_SLCC2372_932920                   | Listeria_monocytogenes_1639_v163 | 0.9358 |
| Listeria_monocytogenes_serotype_4b_str_LL195_1230340     | Listeria_monocytogenes_1639_v163 | 0.9645 |
| Listeria_monocytogenes_serotype_4b_str_LIS0087_1134669   | Listeria_monocytogenes_1639_v163 | 0.9219 |
| Listeria_monocytogenes_serotype_4b_str_F2365_265669      | Listeria_monocytogenes_1639_v163 | 0.9645 |
| Listeria_monocytogenes_serotype_4b_str_CLIP_80459_568819 | Listeria_monocytogenes_1639_v163 | 0.9672 |
| Listeria_monocytogenes_serotype_4b_str_81-0861_1196161   | Listeria_monocytogenes_1639_v163 | 0.9469 |
| Listeria_monocytogenes_serotype_4b_str_81-0592_1196160   | Listeria_monocytogenes_1639_v163 | 0.948  |
| Listeria_monocytogenes_serotype_4b_str_81-0558_1196159   | Listeria_monocytogenes_1639_v163 | 0.9491 |
| Listeria_monocytogenes_serotype_4b_str_10-0809_1196162   | Listeria_monocytogenes_1639_v163 | 0.9484 |
| Listeria_monocytogenes_serotype_4b_str_02-6680_1196175   | Listeria_monocytogenes_1639_v163 | 0.9634 |

|                                                          |                                  |        |
|----------------------------------------------------------|----------------------------------|--------|
| Listeria_monocytogenes_serotype_4b_str_02-6679_1196174   | Listeria_monocytogenes_1639_v163 | 0.9634 |
| Listeria_monocytogenes_serotype_4b_str_02-1792_1196173   | Listeria_monocytogenes_1639_v163 | 0.9488 |
| Listeria_monocytogenes_serotype_4b_str_02-1289_1196172   | Listeria_monocytogenes_1639_v163 | 0.9488 |
| Listeria_monocytogenes_serotype_4b_str_02-1103_1196171   | Listeria_monocytogenes_1639_v163 | 0.9488 |
| Listeria_monocytogenes_serotype_3c_str_10-5027_1196195   | Listeria_monocytogenes_1639_v163 | 0.9367 |
| Listeria_monocytogenes_serotype_1_2c_str_10-5026_1196194 | Listeria_monocytogenes_1639_v163 | 0.9379 |
| Listeria_monocytogenes_serotype_1_2c_str_10-5025_1196193 | Listeria_monocytogenes_1639_v163 | 0.9379 |
| Listeria_monocytogenes_serotype_1_2b_str_10-0811_1196164 | Listeria_monocytogenes_1639_v163 | 0.9465 |
| Listeria_monocytogenes_serotype_1_2b_str_10-0810_1196163 | Listeria_monocytogenes_1639_v163 | 0.9465 |
| Listeria_monocytogenes_serotype_1_2a_str_99-6370_1196179 | Listeria_monocytogenes_1639_v163 | 0.9204 |
| Listeria_monocytogenes_serotype_1_2a_str_98-2035_1196178 | Listeria_monocytogenes_1639_v163 | 0.9204 |
| Listeria_monocytogenes_serotype_1_2a_str_95-0093_1196177 | Listeria_monocytogenes_1639_v163 | 0.9255 |
| Listeria_monocytogenes_serotype_1_2a_str_88-0478_1196176 | Listeria_monocytogenes_1639_v163 | 0.9247 |
| Listeria_monocytogenes_serotype_1_2a_str_10-5024_1196192 | Listeria_monocytogenes_1639_v163 | 0.9259 |
| Listeria_monocytogenes_serotype_1_2a_str_10-4758_1196168 | Listeria_monocytogenes_1639_v163 | 0.943  |
| Listeria_monocytogenes_serotype_1_2a_str_10-4754_1196167 | Listeria_monocytogenes_1639_v163 | 0.943  |
| Listeria_monocytogenes_serotype_1_2a_str_10-1321_1196191 | Listeria_monocytogenes_1639_v163 | 0.9259 |
| Listeria_monocytogenes_serotype_1_2a_str_10-1047_1196190 | Listeria_monocytogenes_1639_v163 | 0.9262 |
| Listeria_monocytogenes_serotype_1_2a_str_10-1046_1196189 | Listeria_monocytogenes_1639_v163 | 0.9262 |
| Listeria_monocytogenes_serotype_1_2a_str_10-0934_1196170 | Listeria_monocytogenes_1639_v163 | 0.9535 |
| Listeria_monocytogenes_serotype_1_2a_str_10-0933_1196169 | Listeria_monocytogenes_1639_v163 | 0.9535 |
| Listeria_monocytogenes_serotype_1_2a_str_10-0815_1196188 | Listeria_monocytogenes_1639_v163 | 0.9218 |
| Listeria_monocytogenes_serotype_1_2a_str_10-0814_1196187 | Listeria_monocytogenes_1639_v163 | 0.9259 |
| Listeria_monocytogenes_serotype_1_2a_str_10-0813_1196166 | Listeria_monocytogenes_1639_v163 | 0.938  |
| Listeria_monocytogenes_serotype_1_2a_str_10-0812_1196165 | Listeria_monocytogenes_1639_v163 | 0.938  |
| Listeria_monocytogenes_serotype_1_2a_str_08-7669_1196186 | Listeria_monocytogenes_1639_v163 | 0.9354 |
| Listeria_monocytogenes_serotype_1_2a_str_08-7374_1196185 | Listeria_monocytogenes_1639_v163 | 0.9259 |
| Listeria_monocytogenes_serotype_1_2a_str_08-6997_1196184 | Listeria_monocytogenes_1639_v163 | 0.9218 |
| Listeria_monocytogenes_serotype_1_2a_str_08-6569_1196183 | Listeria_monocytogenes_1639_v163 | 0.9218 |
| Listeria_monocytogenes_serotype_1_2a_str_08-6056_1196182 | Listeria_monocytogenes_1639_v163 | 0.9218 |
| Listeria_monocytogenes_serotype_1_2a_str_04-5457_1196181 | Listeria_monocytogenes_1639_v163 | 0.9259 |
| Listeria_monocytogenes_serotype_1_2a_str_02-5993_1196180 | Listeria_monocytogenes_1639_v163 | 0.9255 |
| Listeria_monocytogenes_R479a_1437838                     | Listeria_monocytogenes_1639_v163 | 0.929  |
| Listeria_monocytogenes_N53-1_1234142                     | Listeria_monocytogenes_1639_v163 | 0.9011 |
| Listeria_monocytogenes_M7_1030009                        | Listeria_monocytogenes_1639_v163 | 0.9084 |
| Listeria_monocytogenes_LO28_393132                       | Listeria_monocytogenes_1639_v163 | 0.9361 |
| Listeria_monocytogenes_L99_563174                        | Listeria_monocytogenes_1639_v163 | 0.9091 |
| Listeria_monocytogenes_L312_882094                       | Listeria_monocytogenes_1639_v163 | 0.9675 |
| Listeria_monocytogenes_J1816_930781                      | Listeria_monocytogenes_1639_v163 | 0.9448 |
| Listeria_monocytogenes_J1-220_930782                     | Listeria_monocytogenes_1639_v163 | 0.9394 |
| Listeria_monocytogenes_J0161_393130                      | Listeria_monocytogenes_1639_v163 | 0.9384 |
| Listeria_monocytogenes_HCC23_552536                      | Listeria_monocytogenes_1639_v163 | 0.9083 |
| Listeria_monocytogenes_FSL_R2-561_393126                 | Listeria_monocytogenes_1639_v163 | 0.9361 |
| Listeria_monocytogenes_FSL_J1-208_393119                 | Listeria_monocytogenes_1639_v163 | 0.9141 |
| Listeria_monocytogenes_FSL_J1-175_393118                 | Listeria_monocytogenes_1639_v163 | 0.9644 |
| Listeria_monocytogenes_Finland_1998_393127               | Listeria_monocytogenes_1639_v163 | 0.9585 |
| Listeria_monocytogenes_EGD-e_169963_v1                   | Listeria_monocytogenes_1639_v163 | 0.945  |
| Listeria_monocytogenes_EGD-e_169963                      | Listeria_monocytogenes_1639_v163 | 0.9454 |
| Listeria_monocytogenes_EGD_1334565                       | Listeria_monocytogenes_1639_v163 | 0.946  |
| Listeria_monocytogenes_CFSAN002349_1299895               | Listeria_monocytogenes_1639_v163 | 0.9677 |
| Listeria_monocytogenes_ATCC_19117_882095_v1              | Listeria_monocytogenes_1639_v163 | 0.9596 |
| Listeria_monocytogenes_ATCC_19117_882095                 | Listeria_monocytogenes_1639_v163 | 0.9596 |
| Listeria_monocytogenes_6179_1288295                      | Listeria_monocytogenes_1639_v163 | 0.9232 |
| Listeria_monocytogenes_1639_v9                           | Listeria_monocytogenes_1639_v163 | 0.9346 |
| Listeria_monocytogenes_1639_v99                          | Listeria_monocytogenes_1639_v163 | 0.9532 |
| Listeria_monocytogenes_1639_v98                          | Listeria_monocytogenes_1639_v163 | 0.9326 |
| Listeria_monocytogenes_1639_v97                          | Listeria_monocytogenes_1639_v163 | 0.9551 |
| Listeria_monocytogenes_1639_v96                          | Listeria_monocytogenes_1639_v163 | 0.9524 |
| Listeria_monocytogenes_1639_v95                          | Listeria_monocytogenes_1639_v163 | 0.9525 |
| Listeria_monocytogenes_1639_v94                          | Listeria_monocytogenes_1639_v163 | 0.9528 |
| Listeria_monocytogenes_1639_v93                          | Listeria_monocytogenes_1639_v163 | 0.9356 |
| Listeria_monocytogenes_1639_v92                          | Listeria_monocytogenes_1639_v163 | 0.9528 |
| Listeria_monocytogenes_1639_v91                          | Listeria_monocytogenes_1639_v163 | 0.9455 |
| Listeria_monocytogenes_1639_v90                          | Listeria_monocytogenes_1639_v163 | 0.9326 |
| Listeria_monocytogenes_1639_v8                           | Listeria_monocytogenes_1639_v163 | 0.9186 |
| Listeria_monocytogenes_1639_v89                          | Listeria_monocytogenes_1639_v163 | 0.9545 |
| Listeria_monocytogenes_1639_v88                          | Listeria_monocytogenes_1639_v163 | 0.9339 |
| Listeria_monocytogenes_1639_v87                          | Listeria_monocytogenes_1639_v163 | 0.9331 |
| Listeria_monocytogenes_1639_v86                          | Listeria_monocytogenes_1639_v163 | 0.9323 |
| Listeria_monocytogenes_1639_v85                          | Listeria_monocytogenes_1639_v163 | 0.9466 |
| Listeria_monocytogenes_1639_v84                          | Listeria_monocytogenes_1639_v163 | 0.9391 |
| Listeria_monocytogenes_1639_v83                          | Listeria_monocytogenes_1639_v163 | 0.9483 |
| Listeria_monocytogenes_1639_v82                          | Listeria_monocytogenes_1639_v163 | 0.948  |
| Listeria_monocytogenes_1639_v81                          | Listeria_monocytogenes_1639_v163 | 0.9389 |
| Listeria_monocytogenes_1639_v80                          | Listeria_monocytogenes_1639_v163 | 0.9505 |
| Listeria_monocytogenes_1639_v7                           | Listeria_monocytogenes_1639_v163 | 0.9186 |
| Listeria_monocytogenes_1639_v79                          | Listeria_monocytogenes_1639_v163 | 0.9367 |
| Listeria_monocytogenes_1639_v78                          | Listeria_monocytogenes_1639_v163 | 0.9381 |
| Listeria_monocytogenes_1639_v77                          | Listeria_monocytogenes_1639_v163 | 0.9364 |
| Listeria_monocytogenes_1639_v76                          | Listeria_monocytogenes_1639_v163 | 0.9269 |
| Listeria_monocytogenes_1639_v75                          | Listeria_monocytogenes_1639_v163 | 0.9091 |
| Listeria_monocytogenes_1639_v74                          | Listeria_monocytogenes_1639_v163 | 0.9365 |
| Listeria_monocytogenes_1639_v73                          | Listeria_monocytogenes_1639_v163 | 0.9368 |
| Listeria_monocytogenes_1639_v72                          | Listeria_monocytogenes_1639_v163 | 0.9471 |
| Listeria_monocytogenes_1639_v71                          | Listeria_monocytogenes_1639_v163 | 0.9253 |
| Listeria_monocytogenes_1639_v70                          | Listeria_monocytogenes_1639_v163 | 0.9374 |
| Listeria_monocytogenes_1639_v6                           | Listeria_monocytogenes_1639_v163 | 0.9179 |
| Listeria_monocytogenes_1639_v69                          | Listeria_monocytogenes_1639_v163 | 0.9484 |
| Listeria_monocytogenes_1639_v68                          | Listeria_monocytogenes_1639_v163 | 0.9441 |
| Listeria_monocytogenes_1639_v67                          | Listeria_monocytogenes_1639_v163 | 0.9563 |
| Listeria_monocytogenes_1639_v66                          | Listeria_monocytogenes_1639_v163 | 0.9427 |

[illegible]



|                                                          |                                  |        |
|----------------------------------------------------------|----------------------------------|--------|
| Listeria_welshimeri_1643                                 | Listeria_monocytogenes_1639_v164 | 0.8882 |
| Listeria_welshimeri_serovar_6b_str_SLCC5334_386043       | Listeria_monocytogenes_1639_v164 | 0.8879 |
| Listeria_seeligeri_serovar_1_2b_str_SLCC3954_683837      | Listeria_monocytogenes_1639_v164 | 0.8897 |
| Listeria_seeligeri_FSL_S4-171_702452                     | Listeria_monocytogenes_1639_v164 | 0.829  |
| Listeria_seeligeri_FSL_N1-067_702453                     | Listeria_monocytogenes_1639_v164 | 0.8306 |
| Listeria_seeligeri_1640_v1                               | Listeria_monocytogenes_1639_v164 | 0.8973 |
| Listeria_seeligeri_1640                                  | Listeria_monocytogenes_1639_v164 | 0.8861 |
| Listeria_monocytogenes_WSLC1042_1457188                  | Listeria_monocytogenes_1639_v164 | 0.9908 |
| Listeria_monocytogenes_WSLC1001_1457187                  | Listeria_monocytogenes_1639_v164 | 0.9309 |
| Listeria_monocytogenes_SLCC7179_879090                   | Listeria_monocytogenes_1639_v164 | 0.941  |
| Listeria_monocytogenes_SLCC5850_882096                   | Listeria_monocytogenes_1639_v164 | 0.9356 |
| Listeria_monocytogenes_SLCC2755_932919                   | Listeria_monocytogenes_1639_v164 | 0.9506 |
| Listeria_monocytogenes_SLCC2540_879089                   | Listeria_monocytogenes_1639_v164 | 0.9534 |
| Listeria_monocytogenes_SLCC2479_882020                   | Listeria_monocytogenes_1639_v164 | 0.9306 |
| Listeria_monocytogenes_SLCC2378_879088                   | Listeria_monocytogenes_1639_v164 | 0.9919 |
| Listeria_monocytogenes_SLCC2376_882097                   | Listeria_monocytogenes_1639_v164 | 0.9476 |
| Listeria_monocytogenes_SLCC2372_932920                   | Listeria_monocytogenes_1639_v164 | 0.9233 |
| Listeria_monocytogenes_serotype_4b_str_LL195_1230340     | Listeria_monocytogenes_1639_v164 | 0.9985 |
| Listeria_monocytogenes_serotype_4b_str_LIS0087_1134669   | Listeria_monocytogenes_1639_v164 | 0.9113 |
| Listeria_monocytogenes_serotype_4b_str_F2365_265669      | Listeria_monocytogenes_1639_v164 | 0.9985 |
| Listeria_monocytogenes_serotype_4b_str_CLIP_80459_568819 | Listeria_monocytogenes_1639_v164 | 0.9783 |
| Listeria_monocytogenes_serotype_4b_str_81-0861_1196161   | Listeria_monocytogenes_1639_v164 | 0.9803 |
| Listeria_monocytogenes_serotype_4b_str_81-0592_1196160   | Listeria_monocytogenes_1639_v164 | 0.9814 |
| Listeria_monocytogenes_serotype_4b_str_81-0558_1196159   | Listeria_monocytogenes_1639_v164 | 0.981  |
| Listeria_monocytogenes_serotype_4b_str_10-0809_1196162   | Listeria_monocytogenes_1639_v164 | 0.9818 |
| Listeria_monocytogenes_serotype_4b_str_02-6680_1196175   | Listeria_monocytogenes_1639_v164 | 0.9788 |
| Listeria_monocytogenes_serotype_4b_str_02-6679_1196174   | Listeria_monocytogenes_1639_v164 | 0.9788 |
| Listeria_monocytogenes_serotype_4b_str_02-1792_1196173   | Listeria_monocytogenes_1639_v164 | 0.9818 |
| Listeria_monocytogenes_serotype_4b_str_02-1289_1196172   | Listeria_monocytogenes_1639_v164 | 0.9818 |
| Listeria_monocytogenes_serotype_4b_str_02-1103_1196171   | Listeria_monocytogenes_1639_v164 | 0.9818 |
| Listeria_monocytogenes_serotype_3c_str_10-5027_1196195   | Listeria_monocytogenes_1639_v164 | 0.9298 |
| Listeria_monocytogenes_serotype_1_2c_str_10-5026_1196194 | Listeria_monocytogenes_1639_v164 | 0.9306 |
| Listeria_monocytogenes_serotype_1_2c_str_10-5025_1196193 | Listeria_monocytogenes_1639_v164 | 0.9306 |
| Listeria_monocytogenes_serotype_1_2b_str_10-0811_1196164 | Listeria_monocytogenes_1639_v164 | 0.9437 |
| Listeria_monocytogenes_serotype_1_2b_str_10-0810_1196163 | Listeria_monocytogenes_1639_v164 | 0.9437 |
| Listeria_monocytogenes_serotype_1_2a_str_99-6370_1196179 | Listeria_monocytogenes_1639_v164 | 0.9165 |
| Listeria_monocytogenes_serotype_1_2a_str_98-2035_1196178 | Listeria_monocytogenes_1639_v164 | 0.9165 |
| Listeria_monocytogenes_serotype_1_2a_str_95-0093_1196177 | Listeria_monocytogenes_1639_v164 | 0.922  |
| Listeria_monocytogenes_serotype_1_2a_str_88-0478_1196176 | Listeria_monocytogenes_1639_v164 | 0.9209 |
| Listeria_monocytogenes_serotype_1_2a_str_10-5024_1196192 | Listeria_monocytogenes_1639_v164 | 0.922  |
| Listeria_monocytogenes_serotype_1_2a_str_10-4758_1196168 | Listeria_monocytogenes_1639_v164 | 0.9399 |
| Listeria_monocytogenes_serotype_1_2a_str_10-4754_1196167 | Listeria_monocytogenes_1639_v164 | 0.9402 |
| Listeria_monocytogenes_serotype_1_2a_str_10-1321_1196191 | Listeria_monocytogenes_1639_v164 | 0.922  |
| Listeria_monocytogenes_serotype_1_2a_str_10-1047_1196190 | Listeria_monocytogenes_1639_v164 | 0.9227 |
| Listeria_monocytogenes_serotype_1_2a_str_10-1046_1196189 | Listeria_monocytogenes_1639_v164 | 0.9227 |
| Listeria_monocytogenes_serotype_1_2a_str_10-0934_1196170 | Listeria_monocytogenes_1639_v164 | 0.948  |
| Listeria_monocytogenes_serotype_1_2a_str_10-0933_1196169 | Listeria_monocytogenes_1639_v164 | 0.948  |
| Listeria_monocytogenes_serotype_1_2a_str_10-0815_1196188 | Listeria_monocytogenes_1639_v164 | 0.9179 |
| Listeria_monocytogenes_serotype_1_2a_str_10-0814_1196187 | Listeria_monocytogenes_1639_v164 | 0.9224 |
| Listeria_monocytogenes_serotype_1_2a_str_10-0813_1196166 | Listeria_monocytogenes_1639_v164 | 0.9284 |
| Listeria_monocytogenes_serotype_1_2a_str_10-0812_1196165 | Listeria_monocytogenes_1639_v164 | 0.9284 |
| Listeria_monocytogenes_serotype_1_2a_str_08-7669_1196186 | Listeria_monocytogenes_1639_v164 | 0.9315 |
| Listeria_monocytogenes_serotype_1_2a_str_08-7374_1196185 | Listeria_monocytogenes_1639_v164 | 0.922  |
| Listeria_monocytogenes_serotype_1_2a_str_08-6997_1196184 | Listeria_monocytogenes_1639_v164 | 0.9179 |
| Listeria_monocytogenes_serotype_1_2a_str_08-6569_1196183 | Listeria_monocytogenes_1639_v164 | 0.9179 |
| Listeria_monocytogenes_serotype_1_2a_str_08-6056_1196182 | Listeria_monocytogenes_1639_v164 | 0.9179 |
| Listeria_monocytogenes_serotype_1_2a_str_04-5457_1196181 | Listeria_monocytogenes_1639_v164 | 0.922  |
| Listeria_monocytogenes_serotype_1_2a_str_02-5993_1196180 | Listeria_monocytogenes_1639_v164 | 0.922  |
| Listeria_monocytogenes_R479a_1437838                     | Listeria_monocytogenes_1639_v164 | 0.9213 |
| Listeria_monocytogenes_N53-1_1234142                     | Listeria_monocytogenes_1639_v164 | 0.8961 |
| Listeria_monocytogenes_M7_1030009                        | Listeria_monocytogenes_1639_v164 | 0.9109 |
| Listeria_monocytogenes_LO28_393132                       | Listeria_monocytogenes_1639_v164 | 0.9292 |
| Listeria_monocytogenes_L99_563174                        | Listeria_monocytogenes_1639_v164 | 0.9112 |
| Listeria_monocytogenes_L312_882094                       | Listeria_monocytogenes_1639_v164 | 0.9787 |
| Listeria_monocytogenes_J1816_930781                      | Listeria_monocytogenes_1639_v164 | 0.9542 |
| Listeria_monocytogenes_J1-220_930782                     | Listeria_monocytogenes_1639_v164 | 0.9563 |
| Listeria_monocytogenes_J0161_393130                      | Listeria_monocytogenes_1639_v164 | 0.9284 |
| Listeria_monocytogenes_HCC23_552536                      | Listeria_monocytogenes_1639_v164 | 0.9105 |
| Listeria_monocytogenes_FSL_R2-561_393126                 | Listeria_monocytogenes_1639_v164 | 0.9292 |
| Listeria_monocytogenes_FSL_J1-208_393119                 | Listeria_monocytogenes_1639_v164 | 0.924  |
| Listeria_monocytogenes_FSL_J1-175_393118                 | Listeria_monocytogenes_1639_v164 | 0.9582 |
| Listeria_monocytogenes_Finland_1998_393127               | Listeria_monocytogenes_1639_v164 | 0.948  |
| Listeria_monocytogenes_EGD-e_169963_v1                   | Listeria_monocytogenes_1639_v164 | 0.9384 |
| Listeria_monocytogenes_EGD-e_169963                      | Listeria_monocytogenes_1639_v164 | 0.9388 |
| Listeria_monocytogenes_EGD_1334565                       | Listeria_monocytogenes_1639_v164 | 0.9363 |
| Listeria_monocytogenes_CFSAN002349_1299895               | Listeria_monocytogenes_1639_v164 | 0.978  |
| Listeria_monocytogenes_ATCC_19117_882095_v1              | Listeria_monocytogenes_1639_v164 | 0.9769 |
| Listeria_monocytogenes_ATCC_19117_882095                 | Listeria_monocytogenes_1639_v164 | 0.9765 |
| Listeria_monocytogenes_6179_1288295                      | Listeria_monocytogenes_1639_v164 | 0.9134 |
| Listeria_monocytogenes_1639_v9                           | Listeria_monocytogenes_1639_v164 | 0.9285 |
| Listeria_monocytogenes_1639_v99                          | Listeria_monocytogenes_1639_v164 | 0.9554 |
| Listeria_monocytogenes_1639_v98                          | Listeria_monocytogenes_1639_v164 | 0.9249 |
| Listeria_monocytogenes_1639_v97                          | Listeria_monocytogenes_1639_v164 | 0.9695 |
| Listeria_monocytogenes_1639_v96                          | Listeria_monocytogenes_1639_v164 | 0.9546 |
| Listeria_monocytogenes_1639_v95                          | Listeria_monocytogenes_1639_v164 | 0.9547 |
| Listeria_monocytogenes_1639_v94                          | Listeria_monocytogenes_1639_v164 | 0.955  |
| Listeria_monocytogenes_1639_v93                          | Listeria_monocytogenes_1639_v164 | 0.928  |
| Listeria_monocytogenes_1639_v92                          | Listeria_monocytogenes_1639_v164 | 0.955  |
| Listeria_monocytogenes_1639_v91                          | Listeria_monocytogenes_1639_v164 | 0.9777 |
| Listeria_monocytogenes_1639_v90                          | Listeria_monocytogenes_1639_v164 | 0.9249 |
| Listeria_monocytogenes_1639_v8                           | Listeria_monocytogenes_1639_v164 | 0.9107 |

[illegible]

|                                                          |                                  |        |
|----------------------------------------------------------|----------------------------------|--------|
| Listeria_monocytogenes_1639_v186                         | Listeria_monocytogenes_1639_v164 | 0.9483 |
| Listeria_monocytogenes_1639_v185                         | Listeria_monocytogenes_1639_v164 | 0.9483 |
| Listeria_monocytogenes_1639_v184                         | Listeria_monocytogenes_1639_v164 | 0.9471 |
| Listeria_monocytogenes_1639_v183                         | Listeria_monocytogenes_1639_v164 | 0.9494 |
| Listeria_monocytogenes_1639_v182                         | Listeria_monocytogenes_1639_v164 | 0.9517 |
| Listeria_monocytogenes_1639_v181                         | Listeria_monocytogenes_1639_v164 | 0.9377 |
| Listeria_monocytogenes_1639_v180                         | Listeria_monocytogenes_1639_v164 | 0.9377 |
| Listeria_monocytogenes_1639_v17                          | Listeria_monocytogenes_1639_v164 | 0.9458 |
| Listeria_monocytogenes_1639_v179                         | Listeria_monocytogenes_1639_v164 | 0.9357 |
| Listeria_monocytogenes_1639_v178                         | Listeria_monocytogenes_1639_v164 | 0.9522 |
| Listeria_monocytogenes_1639_v177                         | Listeria_monocytogenes_1639_v164 | 0.9745 |
| Listeria_monocytogenes_1639_v176                         | Listeria_monocytogenes_1639_v164 | 0.9462 |
| Listeria_monocytogenes_1639_v175                         | Listeria_monocytogenes_1639_v164 | 0.9411 |
| Listeria_monocytogenes_1639_v174                         | Listeria_monocytogenes_1639_v164 | 0.9507 |
| Listeria_monocytogenes_1639_v173                         | Listeria_monocytogenes_1639_v164 | 0.9728 |
| Listeria_monocytogenes_1639_v172                         | Listeria_monocytogenes_1639_v164 | 0.9463 |
| Listeria_monocytogenes_1639_v171                         | Listeria_monocytogenes_1639_v164 | 0.933  |
| Listeria_monocytogenes_1639_v170                         | Listeria_monocytogenes_1639_v164 | 0.9413 |
| Listeria_monocytogenes_1639_v16                          | Listeria_monocytogenes_1639_v164 | 0.9084 |
| Listeria_monocytogenes_1639_v169                         | Listeria_monocytogenes_1639_v164 | 0.9433 |
| Listeria_monocytogenes_1639_v168                         | Listeria_monocytogenes_1639_v164 | 0.9461 |
| Listeria_monocytogenes_1639_v167                         | Listeria_monocytogenes_1639_v164 | 0.9378 |
| Listeria_monocytogenes_1639_v166                         | Listeria_monocytogenes_1639_v164 | 0.9465 |
| Listeria_monocytogenes_1639_v165                         | Listeria_monocytogenes_1639_v164 | 0.9429 |
| Listeria_monocytogenes_1639_v164                         | Listeria_monocytogenes_1639_v164 | 0.0642 |
| Listeria_welshimeri_1643                                 | Listeria_monocytogenes_1639_v165 | 0.8817 |
| Listeria_welshimeri_serovar_6b_str_SLCC5334_386043       | Listeria_monocytogenes_1639_v165 | 0.8814 |
| Listeria_seeligeri_serovar_1_2b_str_SLCC3954_683837      | Listeria_monocytogenes_1639_v165 | 0.8846 |
| Listeria_seeligeri_FSL_S4-171_702452                     | Listeria_monocytogenes_1639_v165 | 0.819  |
| Listeria_seeligeri_FSL_N1-067_702453                     | Listeria_monocytogenes_1639_v165 | 0.8358 |
| Listeria_seeligeri_1640_v1                               | Listeria_monocytogenes_1639_v165 | 0.8858 |
| Listeria_seeligeri_1640                                  | Listeria_monocytogenes_1639_v165 | 0.8793 |
| Listeria_monocytogenes_WSLC1042_1457188                  | Listeria_monocytogenes_1639_v165 | 0.9362 |
| Listeria_monocytogenes_WSLC1001_1457187                  | Listeria_monocytogenes_1639_v165 | 0.9711 |
| Listeria_monocytogenes_SLCC7179_879090                   | Listeria_monocytogenes_1639_v165 | 0.9601 |
| Listeria_monocytogenes_SLCC5850_882096                   | Listeria_monocytogenes_1639_v165 | 0.9725 |
| Listeria_monocytogenes_SLCC2755_932919                   | Listeria_monocytogenes_1639_v165 | 0.9379 |
| Listeria_monocytogenes_SLCC2540_879089                   | Listeria_monocytogenes_1639_v165 | 0.9616 |
| Listeria_monocytogenes_SLCC2479_882020                   | Listeria_monocytogenes_1639_v165 | 0.9607 |
| Listeria_monocytogenes_SLCC2378_879088                   | Listeria_monocytogenes_1639_v165 | 0.9373 |
| Listeria_monocytogenes_SLCC2376_882097                   | Listeria_monocytogenes_1639_v165 | 0.942  |
| Listeria_monocytogenes_SLCC2372_932920                   | Listeria_monocytogenes_1639_v165 | 0.9535 |
| Listeria_monocytogenes_serotype_4b_str_LL195_1230340     | Listeria_monocytogenes_1639_v165 | 0.9434 |
| Listeria_monocytogenes_serotype_4b_str_LIS0087_1134669   | Listeria_monocytogenes_1639_v165 | 0.9495 |
| Listeria_monocytogenes_serotype_4b_str_F2365_265669      | Listeria_monocytogenes_1639_v165 | 0.9434 |
| Listeria_monocytogenes_serotype_4b_str_CLIP_80459_568819 | Listeria_monocytogenes_1639_v165 | 0.9511 |
| Listeria_monocytogenes_serotype_4b_str_81-0861_1196161   | Listeria_monocytogenes_1639_v165 | 0.9278 |
| Listeria_monocytogenes_serotype_4b_str_81-0592_1196160   | Listeria_monocytogenes_1639_v165 | 0.9288 |
| Listeria_monocytogenes_serotype_4b_str_81-0558_1196159   | Listeria_monocytogenes_1639_v165 | 0.9292 |
| Listeria_monocytogenes_serotype_4b_str_10-0809_1196162   | Listeria_monocytogenes_1639_v165 | 0.9288 |
| Listeria_monocytogenes_serotype_4b_str_02-6680_1196175   | Listeria_monocytogenes_1639_v165 | 0.9477 |
| Listeria_monocytogenes_serotype_4b_str_02-6679_1196174   | Listeria_monocytogenes_1639_v165 | 0.9477 |
| Listeria_monocytogenes_serotype_4b_str_02-1792_1196173   | Listeria_monocytogenes_1639_v165 | 0.9307 |
| Listeria_monocytogenes_serotype_4b_str_02-1289_1196172   | Listeria_monocytogenes_1639_v165 | 0.9307 |
| Listeria_monocytogenes_serotype_4b_str_02-1103_1196171   | Listeria_monocytogenes_1639_v165 | 0.9307 |
| Listeria_monocytogenes_serotype_3c_str_10-5027_1196195   | Listeria_monocytogenes_1639_v165 | 0.9607 |
| Listeria_monocytogenes_serotype_1_2c_str_10-5026_1196194 | Listeria_monocytogenes_1639_v165 | 0.9611 |
| Listeria_monocytogenes_serotype_1_2c_str_10-5025_1196193 | Listeria_monocytogenes_1639_v165 | 0.9611 |
| Listeria_monocytogenes_serotype_1_2b_str_10-0811_1196164 | Listeria_monocytogenes_1639_v165 | 0.9443 |
| Listeria_monocytogenes_serotype_1_2b_str_10-0810_1196163 | Listeria_monocytogenes_1639_v165 | 0.9443 |
| Listeria_monocytogenes_serotype_1_2a_str_99-6370_1196179 | Listeria_monocytogenes_1639_v165 | 0.9512 |
| Listeria_monocytogenes_serotype_1_2a_str_98-2035_1196178 | Listeria_monocytogenes_1639_v165 | 0.9512 |
| Listeria_monocytogenes_serotype_1_2a_str_95-0093_1196177 | Listeria_monocytogenes_1639_v165 | 0.9565 |
| Listeria_monocytogenes_serotype_1_2a_str_88-0478_1196176 | Listeria_monocytogenes_1639_v165 | 0.955  |
| Listeria_monocytogenes_serotype_1_2a_str_10-5024_1196192 | Listeria_monocytogenes_1639_v165 | 0.9568 |
| Listeria_monocytogenes_serotype_1_2a_str_10-4758_1196168 | Listeria_monocytogenes_1639_v165 | 0.9775 |
| Listeria_monocytogenes_serotype_1_2a_str_10-4754_1196167 | Listeria_monocytogenes_1639_v165 | 0.9779 |
| Listeria_monocytogenes_serotype_1_2a_str_10-1321_1196191 | Listeria_monocytogenes_1639_v165 | 0.9568 |
| Listeria_monocytogenes_serotype_1_2a_str_10-1047_1196190 | Listeria_monocytogenes_1639_v165 | 0.9568 |
| Listeria_monocytogenes_serotype_1_2a_str_10-1046_1196189 | Listeria_monocytogenes_1639_v165 | 0.9568 |
| Listeria_monocytogenes_serotype_1_2a_str_10-0934_1196170 | Listeria_monocytogenes_1639_v165 | 0.9706 |
| Listeria_monocytogenes_serotype_1_2a_str_10-0933_1196169 | Listeria_monocytogenes_1639_v165 | 0.9706 |
| Listeria_monocytogenes_serotype_1_2a_str_10-0815_1196188 | Listeria_monocytogenes_1639_v165 | 0.9522 |
| Listeria_monocytogenes_serotype_1_2a_str_10-0814_1196187 | Listeria_monocytogenes_1639_v165 | 0.9568 |
| Listeria_monocytogenes_serotype_1_2a_str_10-0813_1196166 | Listeria_monocytogenes_1639_v165 | 0.9666 |
| Listeria_monocytogenes_serotype_1_2a_str_10-0812_1196165 | Listeria_monocytogenes_1639_v165 | 0.9666 |
| Listeria_monocytogenes_serotype_1_2a_str_08-7669_1196186 | Listeria_monocytogenes_1639_v165 | 0.9522 |
| Listeria_monocytogenes_serotype_1_2a_str_08-7374_1196185 | Listeria_monocytogenes_1639_v165 | 0.9568 |
| Listeria_monocytogenes_serotype_1_2a_str_08-6997_1196184 | Listeria_monocytogenes_1639_v165 | 0.9522 |
| Listeria_monocytogenes_serotype_1_2a_str_08-6569_1196183 | Listeria_monocytogenes_1639_v165 | 0.9522 |
| Listeria_monocytogenes_serotype_1_2a_str_08-6056_1196182 | Listeria_monocytogenes_1639_v165 | 0.9522 |
| Listeria_monocytogenes_serotype_1_2a_str_04-5457_1196181 | Listeria_monocytogenes_1639_v165 | 0.9568 |
| Listeria_monocytogenes_serotype_1_2a_str_02-5993_1196180 | Listeria_monocytogenes_1639_v165 | 0.9568 |
| Listeria_monocytogenes_R479a_1437838                     | Listeria_monocytogenes_1639_v165 | 0.9543 |
| Listeria_monocytogenes_N53-1_1234142                     | Listeria_monocytogenes_1639_v165 | 0.9105 |
| Listeria_monocytogenes_M7_1030009                        | Listeria_monocytogenes_1639_v165 | 0.9172 |
| Listeria_monocytogenes_LO28_393132                       | Listeria_monocytogenes_1639_v165 | 0.9593 |
| Listeria_monocytogenes_L99_563174                        | Listeria_monocytogenes_1639_v165 | 0.9175 |
| Listeria_monocytogenes_L312_882094                       | Listeria_monocytogenes_1639_v165 | 0.9511 |
| Listeria_monocytogenes_J1816_930781                      | Listeria_monocytogenes_1639_v165 | 0.9284 |
| Listeria_monocytogenes_J1-220_930782                     | Listeria_monocytogenes_1639_v165 | 0.9332 |

|                                             |                                  |        |
|---------------------------------------------|----------------------------------|--------|
| Listeria_monocytogenes_J0161_393130         | Listeria_monocytogenes_1639_v165 | 0.9513 |
| Listeria_monocytogenes_HCC23_552536         | Listeria_monocytogenes_1639_v165 | 0.9172 |
| Listeria_monocytogenes_FSL_R2-561_393126    | Listeria_monocytogenes_1639_v165 | 0.9596 |
| Listeria_monocytogenes_FSL_J1-208_393119    | Listeria_monocytogenes_1639_v165 | 0.9094 |
| Listeria_monocytogenes_FSL_J1-175_393118    | Listeria_monocytogenes_1639_v165 | 0.9568 |
| Listeria_monocytogenes_Finland_1998_393127  | Listeria_monocytogenes_1639_v165 | 0.966  |
| Listeria_monocytogenes_EGD-e_169963_v1      | Listeria_monocytogenes_1639_v165 | 0.9566 |
| Listeria_monocytogenes_EGD-e_169963         | Listeria_monocytogenes_1639_v165 | 0.9566 |
| Listeria_monocytogenes_EGD_1334565          | Listeria_monocytogenes_1639_v165 | 0.9729 |
| Listeria_monocytogenes_CFSAN002349_1299895  | Listeria_monocytogenes_1639_v165 | 0.947  |
| Listeria_monocytogenes_ATCC_19117_882095_v1 | Listeria_monocytogenes_1639_v165 | 0.9428 |
| Listeria_monocytogenes_ATCC_19117_882095    | Listeria_monocytogenes_1639_v165 | 0.9425 |
| Listeria_monocytogenes_6179_1288295         | Listeria_monocytogenes_1639_v165 | 0.9491 |
| Listeria_monocytogenes_1639_v9              | Listeria_monocytogenes_1639_v165 | 0.9299 |
| Listeria_monocytogenes_1639_v99             | Listeria_monocytogenes_1639_v165 | 0.9288 |
| Listeria_monocytogenes_1639_v98             | Listeria_monocytogenes_1639_v165 | 0.948  |
| Listeria_monocytogenes_1639_v97             | Listeria_monocytogenes_1639_v165 | 0.9381 |
| Listeria_monocytogenes_1639_v96             | Listeria_monocytogenes_1639_v165 | 0.9281 |
| Listeria_monocytogenes_1639_v95             | Listeria_monocytogenes_1639_v165 | 0.9281 |
| Listeria_monocytogenes_1639_v94             | Listeria_monocytogenes_1639_v165 | 0.9288 |
| Listeria_monocytogenes_1639_v93             | Listeria_monocytogenes_1639_v165 | 0.9538 |
| Listeria_monocytogenes_1639_v92             | Listeria_monocytogenes_1639_v165 | 0.9299 |
| Listeria_monocytogenes_1639_v91             | Listeria_monocytogenes_1639_v165 | 0.9351 |
| Listeria_monocytogenes_1639_v90             | Listeria_monocytogenes_1639_v165 | 0.9483 |
| Listeria_monocytogenes_1639_v8              | Listeria_monocytogenes_1639_v165 | 0.9433 |
| Listeria_monocytogenes_1639_v89             | Listeria_monocytogenes_1639_v165 | 0.9401 |
| Listeria_monocytogenes_1639_v88             | Listeria_monocytogenes_1639_v165 | 0.9637 |
| Listeria_monocytogenes_1639_v87             | Listeria_monocytogenes_1639_v165 | 0.9611 |
| Listeria_monocytogenes_1639_v86             | Listeria_monocytogenes_1639_v165 | 0.9608 |
| Listeria_monocytogenes_1639_v85             | Listeria_monocytogenes_1639_v165 | 0.9282 |
| Listeria_monocytogenes_1639_v84             | Listeria_monocytogenes_1639_v165 | 0.9768 |
| Listeria_monocytogenes_1639_v83             | Listeria_monocytogenes_1639_v165 | 0.934  |
| Listeria_monocytogenes_1639_v82             | Listeria_monocytogenes_1639_v165 | 0.9333 |
| Listeria_monocytogenes_1639_v81             | Listeria_monocytogenes_1639_v165 | 0.9617 |
| Listeria_monocytogenes_1639_v80             | Listeria_monocytogenes_1639_v165 | 0.9495 |
| Listeria_monocytogenes_1639_v7              | Listeria_monocytogenes_1639_v165 | 0.9433 |
| Listeria_monocytogenes_1639_v79             | Listeria_monocytogenes_1639_v165 | 0.958  |
| Listeria_monocytogenes_1639_v78             | Listeria_monocytogenes_1639_v165 | 0.9614 |
| Listeria_monocytogenes_1639_v77             | Listeria_monocytogenes_1639_v165 | 0.9548 |
| Listeria_monocytogenes_1639_v76             | Listeria_monocytogenes_1639_v165 | 0.9624 |
| Listeria_monocytogenes_1639_v75             | Listeria_monocytogenes_1639_v165 | 0.9175 |
| Listeria_monocytogenes_1639_v74             | Listeria_monocytogenes_1639_v165 | 0.9468 |
| Listeria_monocytogenes_1639_v73             | Listeria_monocytogenes_1639_v165 | 0.9546 |
| Listeria_monocytogenes_1639_v72             | Listeria_monocytogenes_1639_v165 | 0.9325 |
| Listeria_monocytogenes_1639_v71             | Listeria_monocytogenes_1639_v165 | 0.9502 |
| Listeria_monocytogenes_1639_v70             | Listeria_monocytogenes_1639_v165 | 0.9579 |
| Listeria_monocytogenes_1639_v6              | Listeria_monocytogenes_1639_v165 | 0.9429 |
| Listeria_monocytogenes_1639_v69             | Listeria_monocytogenes_1639_v165 | 0.9288 |
| Listeria_monocytogenes_1639_v68             | Listeria_monocytogenes_1639_v165 | 0.9523 |
| Listeria_monocytogenes_1639_v67             | Listeria_monocytogenes_1639_v165 | 0.9477 |
| Listeria_monocytogenes_1639_v66             | Listeria_monocytogenes_1639_v165 | 0.9695 |
| Listeria_monocytogenes_1639_v65             | Listeria_monocytogenes_1639_v165 | 0.9582 |
| Listeria_monocytogenes_1639_v64             | Listeria_monocytogenes_1639_v165 | 0.9656 |
| Listeria_monocytogenes_1639_v63             | Listeria_monocytogenes_1639_v165 | 0.9454 |
| Listeria_monocytogenes_1639_v62             | Listeria_monocytogenes_1639_v165 | 0.9566 |
| Listeria_monocytogenes_1639_v61             | Listeria_monocytogenes_1639_v165 | 0.9582 |
| Listeria_monocytogenes_1639_v60             | Listeria_monocytogenes_1639_v165 | 0.953  |
| Listeria_monocytogenes_1639_v5              | Listeria_monocytogenes_1639_v165 | 0.8979 |
| Listeria_monocytogenes_1639_v59             | Listeria_monocytogenes_1639_v165 | 0.9416 |
| Listeria_monocytogenes_1639_v58             | Listeria_monocytogenes_1639_v165 | 0.9314 |
| Listeria_monocytogenes_1639_v57             | Listeria_monocytogenes_1639_v165 | 0.9254 |
| Listeria_monocytogenes_1639_v56             | Listeria_monocytogenes_1639_v165 | 0.9344 |
| Listeria_monocytogenes_1639_v55             | Listeria_monocytogenes_1639_v165 | 0.9227 |
| Listeria_monocytogenes_1639_v54             | Listeria_monocytogenes_1639_v165 | 0.9255 |
| Listeria_monocytogenes_1639_v53             | Listeria_monocytogenes_1639_v165 | 0.9511 |
| Listeria_monocytogenes_1639_v52             | Listeria_monocytogenes_1639_v165 | 0.9395 |
| Listeria_monocytogenes_1639_v51             | Listeria_monocytogenes_1639_v165 | 0.9288 |
| Listeria_monocytogenes_1639_v50             | Listeria_monocytogenes_1639_v165 | 0.9553 |
| Listeria_monocytogenes_1639_v4              | Listeria_monocytogenes_1639_v165 | 0.9107 |
| Listeria_monocytogenes_1639_v49             | Listeria_monocytogenes_1639_v165 | 0.9315 |
| Listeria_monocytogenes_1639_v48             | Listeria_monocytogenes_1639_v165 | 0.9557 |
| Listeria_monocytogenes_1639_v47             | Listeria_monocytogenes_1639_v165 | 0.9565 |
| Listeria_monocytogenes_1639_v46             | Listeria_monocytogenes_1639_v165 | 0.9519 |
| Listeria_monocytogenes_1639_v45             | Listeria_monocytogenes_1639_v165 | 0.9469 |
| Listeria_monocytogenes_1639_v44             | Listeria_monocytogenes_1639_v16  |        |

|                                                          |                                  |        |
|----------------------------------------------------------|----------------------------------|--------|
| Listeria_monocytogenes_1639_v29                          | Listeria_monocytogenes_1639_v165 | 0.9472 |
| Listeria_monocytogenes_1639_v28                          | Listeria_monocytogenes_1639_v165 | 0.951  |
| Listeria_monocytogenes_1639_v27                          | Listeria_monocytogenes_1639_v165 | 0.9419 |
| Listeria_monocytogenes_1639_v26                          | Listeria_monocytogenes_1639_v165 | 0.9412 |
| Listeria_monocytogenes_1639_v25                          | Listeria_monocytogenes_1639_v165 | 0.9412 |
| Listeria_monocytogenes_1639_v24                          | Listeria_monocytogenes_1639_v165 | 0.9347 |
| Listeria_monocytogenes_1639_v23                          | Listeria_monocytogenes_1639_v165 | 0.9343 |
| Listeria_monocytogenes_1639_v22                          | Listeria_monocytogenes_1639_v165 | 0.9443 |
| Listeria_monocytogenes_1639_v21                          | Listeria_monocytogenes_1639_v165 | 0.9347 |
| Listeria_monocytogenes_1639_v20                          | Listeria_monocytogenes_1639_v165 | 0.9413 |
| Listeria_monocytogenes_1639_v1                           | Listeria_monocytogenes_1639_v165 | 0.9421 |
| Listeria_monocytogenes_1639_v19                          | Listeria_monocytogenes_1639_v165 | 0.9409 |
| Listeria_monocytogenes_1639_v198                         | Listeria_monocytogenes_1639_v165 | 0.9126 |
| Listeria_monocytogenes_1639_v197                         | Listeria_monocytogenes_1639_v165 | 0.9431 |
| Listeria_monocytogenes_1639_v196                         | Listeria_monocytogenes_1639_v165 | 0.9561 |
| Listeria_monocytogenes_1639_v195                         | Listeria_monocytogenes_1639_v165 | 0.9442 |
| Listeria_monocytogenes_1639_v194                         | Listeria_monocytogenes_1639_v165 | 0.942  |
| Listeria_monocytogenes_1639_v193                         | Listeria_monocytogenes_1639_v165 | 0.9424 |
| Listeria_monocytogenes_1639_v192                         | Listeria_monocytogenes_1639_v165 | 0.9031 |
| Listeria_monocytogenes_1639_v191                         | Listeria_monocytogenes_1639_v165 | 0.9744 |
| Listeria_monocytogenes_1639_v190                         | Listeria_monocytogenes_1639_v165 | 0.9706 |
| Listeria_monocytogenes_1639_v18                          | Listeria_monocytogenes_1639_v165 | 0.9199 |
| Listeria_monocytogenes_1639_v189                         | Listeria_monocytogenes_1639_v165 | 0.9698 |
| Listeria_monocytogenes_1639_v188                         | Listeria_monocytogenes_1639_v165 | 0.9674 |
| Listeria_monocytogenes_1639_v187                         | Listeria_monocytogenes_1639_v165 | 0.9706 |
| Listeria_monocytogenes_1639_v186                         | Listeria_monocytogenes_1639_v165 | 0.9709 |
| Listeria_monocytogenes_1639_v185                         | Listeria_monocytogenes_1639_v165 | 0.9709 |
| Listeria_monocytogenes_1639_v184                         | Listeria_monocytogenes_1639_v165 | 0.9702 |
| Listeria_monocytogenes_1639_v183                         | Listeria_monocytogenes_1639_v165 | 0.9675 |
| Listeria_monocytogenes_1639_v182                         | Listeria_monocytogenes_1639_v165 | 0.9697 |
| Listeria_monocytogenes_1639_v181                         | Listeria_monocytogenes_1639_v165 | 0.9256 |
| Listeria_monocytogenes_1639_v180                         | Listeria_monocytogenes_1639_v165 | 0.9256 |
| Listeria_monocytogenes_1639_v17                          | Listeria_monocytogenes_1639_v165 | 0.9202 |
| Listeria_monocytogenes_1639_v179                         | Listeria_monocytogenes_1639_v165 | 0.9563 |
| Listeria_monocytogenes_1639_v178                         | Listeria_monocytogenes_1639_v165 | 0.9702 |
| Listeria_monocytogenes_1639_v177                         | Listeria_monocytogenes_1639_v165 | 0.9458 |
| Listeria_monocytogenes_1639_v176                         | Listeria_monocytogenes_1639_v165 | 0.9378 |
| Listeria_monocytogenes_1639_v175                         | Listeria_monocytogenes_1639_v165 | 0.9735 |
| Listeria_monocytogenes_1639_v174                         | Listeria_monocytogenes_1639_v165 | 0.9687 |
| Listeria_monocytogenes_1639_v173                         | Listeria_monocytogenes_1639_v165 | 0.9548 |
| Listeria_monocytogenes_1639_v172                         | Listeria_monocytogenes_1639_v165 | 0.9373 |
| Listeria_monocytogenes_1639_v171                         | Listeria_monocytogenes_1639_v165 | 0.9581 |
| Listeria_monocytogenes_1639_v170                         | Listeria_monocytogenes_1639_v165 | 0.9665 |
| Listeria_monocytogenes_1639_v16                          | Listeria_monocytogenes_1639_v165 | 0.9424 |
| Listeria_monocytogenes_1639_v169                         | Listeria_monocytogenes_1639_v165 | 0.9992 |
| Listeria_monocytogenes_1639_v168                         | Listeria_monocytogenes_1639_v165 | 0.966  |
| Listeria_monocytogenes_1639_v167                         | Listeria_monocytogenes_1639_v165 | 0.9585 |
| Listeria_monocytogenes_1639_v166                         | Listeria_monocytogenes_1639_v165 | 0.9664 |
| Listeria_monocytogenes_1639_v165                         | Listeria_monocytogenes_1639_v165 | 0.0657 |
| Listeria_welshimeri_1643                                 | Listeria_monocytogenes_1639_v166 | 0.8832 |
| Listeria_welshimeri_serovar_6b_str_SLCC5334_386043       | Listeria_monocytogenes_1639_v166 | 0.8826 |
| Listeria_seeligeri_serovar_1_2b_str_SLCC3954_683837      | Listeria_monocytogenes_1639_v166 | 0.8941 |
| Listeria_seeligeri_FSL_S4-171_702452                     | Listeria_monocytogenes_1639_v166 | 0.8225 |
| Listeria_seeligeri_FSL_N1-067_702453                     | Listeria_monocytogenes_1639_v166 | 0.8375 |
| Listeria_seeligeri_1640_v1                               | Listeria_monocytogenes_1639_v166 | 0.8882 |
| Listeria_seeligeri_1640                                  | Listeria_monocytogenes_1639_v166 | 0.8854 |
| Listeria_monocytogenes_WSLC1042_1457188                  | Listeria_monocytogenes_1639_v166 | 0.9381 |
| Listeria_monocytogenes_WSLC1001_1457187                  | Listeria_monocytogenes_1639_v166 | 0.9564 |
| Listeria_monocytogenes_SLCC7179_879090                   | Listeria_monocytogenes_1639_v166 | 0.9648 |
| Listeria_monocytogenes_SLCC5850_882096                   | Listeria_monocytogenes_1639_v166 | 0.9608 |
| Listeria_monocytogenes_SLCC2755_932919                   | Listeria_monocytogenes_1639_v166 | 0.9409 |
| Listeria_monocytogenes_SLCC2540_879089                   | Listeria_monocytogenes_1639_v166 | 0.938  |
| Listeria_monocytogenes_SLCC2479_882020                   | Listeria_monocytogenes_1639_v166 | 0.9464 |
| Listeria_monocytogenes_SLCC2378_879088                   | Listeria_monocytogenes_1639_v166 | 0.9392 |
| Listeria_monocytogenes_SLCC2376_882097                   | Listeria_monocytogenes_1639_v166 | 0.9534 |
| Listeria_monocytogenes_SLCC2372_932920                   | Listeria_monocytogenes_1639_v166 | 0.9397 |
| Listeria_monocytogenes_serotype_4b_str_LL195_1230340     | Listeria_monocytogenes_1639_v166 | 0.9454 |
| Listeria_monocytogenes_serotype_4b_str_LIS0087_1134669   | Listeria_monocytogenes_1639_v166 | 0.9367 |
| Listeria_monocytogenes_serotype_4b_str_F2365_265669      | Listeria_monocytogenes_1639_v166 | 0.9454 |
| Listeria_monocytogenes_serotype_4b_str_CLIP_80459_568819 | Listeria_monocytogenes_1639_v166 | 0.95   |
| Listeria_monocytogenes_serotype_4b_str_81-0861_1196161   | Listeria_monocytogenes_1639_v166 | 0.9281 |
| Listeria_monocytogenes_serotype_4b_str_81-0592_1196160   | Listeria_monocytogenes_1639_v166 | 0.9292 |
| Listeria_monocytogenes_serotype_4b_str_81-0558_1196159   | Listeria_monocytogenes_1639_v166 | 0.9299 |
| Listeria_monocytogenes_serotype_4b_str_10-0809_1196162   | Listeria_monocytogenes_1639_v166 | 0.9292 |
| Listeria_monocytogenes_serotype_4b_str_02-6680_1196175   | Listeria_monocytogenes_1639_v166 | 0.9485 |
| Listeria_monocytogenes_serotype_4b_str_02-6679_1196174   | Listeria_monocytogenes_1639_v166 | 0.9485 |
| Listeria_monocytogenes_serotype_4b_str_02-1792_1196173   | Listeria_monocytogenes_1639_v166 | 0.9295 |
| Listeria_monocytogenes_serotype_4b_str_02-1289_1196172   | Listeria_monocytogenes_1639_v166 | 0.9295 |
| Listeria_monocytogenes_serotype_4b_str_02-1103_1196171   | Listeria_monocytogenes_1639_v166 | 0.9295 |
| Listeria_monocytogenes_serotype_3c_str_10-5027_1196195   | Listeria_monocytogenes_1639_v166 | 0.9456 |
| Listeria_monocytogenes_serotype_1_2c_str_10-5026_1196194 | Listeria_monocytogenes_1639_v166 | 0.9468 |
| Listeria_monocytogenes_serotype_1_2c_str_10-5025_1196193 | Listeria_monocytogenes_1639_v166 | 0.9468 |
| Listeria_monocytogenes_serotype_1_2b_str_10-0811_1196164 | Listeria_monocytogenes_1639_v166 | 0.9281 |
| Listeria_monocytogenes_serotype_1_2b_str_10-0810_1196163 | Listeria_monocytogenes_1639_v166 | 0.9281 |
| Listeria_monocytogenes_serotype_1_2a_str_99-6370_1196179 | Listeria_monocytogenes_1639_v166 | 0.9359 |
| Listeria_monocytogenes_serotype_1_2a_str_98-2035_1196178 | Listeria_monocytogenes_1639_v166 | 0.9359 |
| Listeria_monocytogenes_serotype_1_2a_str_95-0093_1196177 | Listeria_monocytogenes_1639_v166 | 0.9419 |
| Listeria_monocytogenes_serotype_1_2a_str_88-0478_1196176 | Listeria_monocytogenes_1639_v166 | 0.9411 |
| Listeria_monocytogenes_serotype_1_2a_str_10-5024_1196192 | Listeria_monocytogenes_1639_v166 | 0.9422 |
| Listeria_monocytogenes_serotype_1_2a_str_10-4758_1196168 | Listeria_monocytogenes_1639_v166 | 0.9581 |
| Listeria_monocytogenes_serotype_1_2a_str_10-4754_1196167 | Listeria_monocytogenes_1639_v166 | 0.9581 |

|                                                          |                                  |        |
|----------------------------------------------------------|----------------------------------|--------|
| Listeria_monocytogenes_serotype_1_2a_str_10-1321_1196191 | Listeria_monocytogenes_1639_v166 | 0.9422 |
| Listeria_monocytogenes_serotype_1_2a_str_10-1047_1196190 | Listeria_monocytogenes_1639_v166 | 0.9426 |
| Listeria_monocytogenes_serotype_1_2a_str_10-1046_1196189 | Listeria_monocytogenes_1639_v166 | 0.9426 |
| Listeria_monocytogenes_serotype_1_2a_str_10-0934_1196170 | Listeria_monocytogenes_1639_v166 | 0.9735 |
| Listeria_monocytogenes_serotype_1_2a_str_10-0933_1196169 | Listeria_monocytogenes_1639_v166 | 0.9735 |
| Listeria_monocytogenes_serotype_1_2a_str_10-0815_1196188 | Listeria_monocytogenes_1639_v166 | 0.9373 |
| Listeria_monocytogenes_serotype_1_2a_str_10-0814_1196187 | Listeria_monocytogenes_1639_v166 | 0.9419 |
| Listeria_monocytogenes_serotype_1_2a_str_10-0813_1196166 | Listeria_monocytogenes_1639_v166 | 0.9535 |
| Listeria_monocytogenes_serotype_1_2a_str_10-0812_1196165 | Listeria_monocytogenes_1639_v166 | 0.9535 |
| Listeria_monocytogenes_serotype_1_2a_str_08-7669_1196186 | Listeria_monocytogenes_1639_v166 | 0.9519 |
| Listeria_monocytogenes_serotype_1_2a_str_08-7374_1196185 | Listeria_monocytogenes_1639_v166 | 0.9422 |
| Listeria_monocytogenes_serotype_1_2a_str_08-6997_1196184 | Listeria_monocytogenes_1639_v166 | 0.9373 |
| Listeria_monocytogenes_serotype_1_2a_str_08-6569_1196183 | Listeria_monocytogenes_1639_v166 | 0.9373 |
| Listeria_monocytogenes_serotype_1_2a_str_08-6056_1196182 | Listeria_monocytogenes_1639_v166 | 0.9373 |
| Listeria_monocytogenes_serotype_1_2a_str_04-5457_1196181 | Listeria_monocytogenes_1639_v166 | 0.9422 |
| Listeria_monocytogenes_serotype_1_2a_str_02-5993_1196180 | Listeria_monocytogenes_1639_v166 | 0.9419 |
| Listeria_monocytogenes_R479a_1437838                     | Listeria_monocytogenes_1639_v166 | 0.9419 |
| Listeria_monocytogenes_N53-1_1234142                     | Listeria_monocytogenes_1639_v166 | 0.9137 |
| Listeria_monocytogenes_M7_1030009                        | Listeria_monocytogenes_1639_v166 | 0.9099 |
| Listeria_monocytogenes_LO28_393132                       | Listeria_monocytogenes_1639_v166 | 0.945  |
| Listeria_monocytogenes_L99_563174                        | Listeria_monocytogenes_1639_v166 | 0.9106 |
| Listeria_monocytogenes_L312_882094                       | Listeria_monocytogenes_1639_v166 | 0.95   |
| Listeria_monocytogenes_J1816_930781                      | Listeria_monocytogenes_1639_v166 | 0.9321 |
| Listeria_monocytogenes_J1-220_930782                     | Listeria_monocytogenes_1639_v166 | 0.9237 |
| Listeria_monocytogenes_J0161_393130                      | Listeria_monocytogenes_1639_v166 | 0.9556 |
| Listeria_monocytogenes_HCC23_552536                      | Listeria_monocytogenes_1639_v166 | 0.9099 |
| Listeria_monocytogenes_FSL_R2-561_393126                 | Listeria_monocytogenes_1639_v166 | 0.945  |
| Listeria_monocytogenes_FSL_J1-208_393119                 | Listeria_monocytogenes_1639_v166 | 0.9104 |
| Listeria_monocytogenes_FSL_J1-175_393118                 | Listeria_monocytogenes_1639_v166 | 0.9412 |
| Listeria_monocytogenes_Finland_1998_393127               | Listeria_monocytogenes_1639_v166 | 0.9716 |
| Listeria_monocytogenes_EGD-e_169963_v1                   | Listeria_monocytogenes_1639_v166 | 0.9551 |
| Listeria_monocytogenes_EGD-e_169963                      | Listeria_monocytogenes_1639_v166 | 0.9548 |
| Listeria_monocytogenes_EGD_1334565                       | Listeria_monocytogenes_1639_v166 | 0.9615 |
| Listeria_monocytogenes_CFSAN002349_1299895               | Listeria_monocytogenes_1639_v166 | 0.9478 |
| Listeria_monocytogenes_ATCC_19117_882095_v1              | Listeria_monocytogenes_1639_v166 | 0.9437 |
| Listeria_monocytogenes_ATCC_19117_882095                 | Listeria_monocytogenes_1639_v166 | 0.9436 |
| Listeria_monocytogenes_6179_1288295                      | Listeria_monocytogenes_1639_v166 | 0.9379 |
| Listeria_monocytogenes_1639_v9                           | Listeria_monocytogenes_1639_v166 | 0.9123 |
| Listeria_monocytogenes_1639_v99                          | Listeria_monocytogenes_1639_v166 | 0.9336 |
| Listeria_monocytogenes_1639_v98                          | Listeria_monocytogenes_1639_v166 | 0.9441 |
| Listeria_monocytogenes_1639_v97                          | Listeria_monocytogenes_1639_v166 | 0.9377 |
| Listeria_monocytogenes_1639_v96                          | Listeria_monocytogenes_1639_v166 | 0.9326 |
| Listeria_monocytogenes_1639_v95                          | Listeria_monocytogenes_1639_v166 | 0.9326 |
| Listeria_monocytogenes_1639_v94                          | Listeria_monocytogenes_1639_v166 | 0.9329 |
| Listeria_monocytogenes_1639_v93                          | Listeria_monocytogenes_1639_v166 | 0.9494 |
| Listeria_monocytogenes_1639_v92                          | Listeria_monocytogenes_1639_v166 | 0.9333 |
| Listeria_monocytogenes_1639_v91                          | Listeria_monocytogenes_1639_v166 | 0.9267 |
| Listeria_monocytogenes_1639_v90                          | Listeria_monocytogenes_1639_v166 | 0.9441 |
| Listeria_monocytogenes_1639_v8                           | Listeria_monocytogenes_1639_v166 | 0.931  |
| Listeria_monocytogenes_1639_v89                          | Listeria_monocytogenes_1639_v166 | 0.9397 |
| Listeria_monocytogenes_1639_v88                          | Listeria_monocytogenes_1639_v166 | 0.9535 |
| Listeria_monocytogenes_1639_v87                          | Listeria_monocytogenes_1639_v166 | 0.9484 |
| Listeria_monocytogenes_1639_v86                          | Listeria_monocytogenes_1639_v166 | 0.948  |
| Listeria_monocytogenes_1639_v85                          | Listeria_monocytogenes_1639_v166 | 0.9274 |
| Listeria_monocytogenes_1639_v84                          | Listeria_monocytogenes_1639_v166 | 0.9561 |
| Listeria_monocytogenes_1639_v83                          | Listeria_monocytogenes_1639_v166 | 0.9325 |
| Listeria_monocytogenes_1639_v82                          | Listeria_monocytogenes_1639_v166 | 0.9318 |
| Listeria_monocytogenes_1639_v81                          | Listeria_monocytogenes_1639_v166 | 0.9516 |
| Listeria_monocytogenes_1639_v80                          | Listeria_monocytogenes_1639_v166 | 0.9327 |
| Listeria_monocytogenes_1639_v7                           | Listeria_monocytogenes_1639_v166 | 0.931  |
| Listeria_monocytogenes_1639_v79                          | Listeria_monocytogenes_1639_v166 | 0.9494 |
| Listeria_monocytogenes_1639_v78                          | Listeria_monocytogenes_1639_v166 | 0.9509 |
| Listeria_monocytogenes_1639_v77                          | Listeria_monocytogenes_1639_v166 | 0.9572 |
| Listeria_monocytogenes_1639_v76                          | Listeria_monocytogenes_1639_v166 | 0.941  |
| Listeria_monocytogenes_1639_v75                          | Listeria_monocytogenes_1639_v166 | 0.9106 |
| Listeria_monocytogenes_1639_v74                          | Listeria_monocytogenes_1639_v166 | 0.9491 |
| Listeria_monocytogenes_1639_v73                          | Listeria_monocytogenes_1639_v166 | 0.9404 |
| Listeria_monocytogenes_1639_v72                          | Listeria_monocytogenes_1639_v166 | 0.9313 |
| Listeria_monocytogenes_1639_v71                          | Listeria_monocytogenes_1639_v166 | 0.9394 |
| Listeria_monocytogenes_1639_v70                          | Listeria_monocytogenes_1639_v166 | 0.9428 |
| Listeria_monocytogenes_1639_v6                           | Listeria_monocytogenes_1639_v166 | 0.9303 |
| Listeria_monocytogenes_1639_v69                          | Listeria_monocytogenes_1639_v166 | 0.9295 |
| Listeria_monocytogenes_1639_v68                          | Listeria_monocytogenes_1639_v166 | 0.9615 |
| Listeria_monocytogenes_1639_v67                          | Listeria_monocytogenes_1639_v166 | 0.9333 |
| Listeria_monocytogenes_1639_v66                          | Listeria_monocytogenes_1639_v166 | 0.9609 |
| Listeria_monocytogenes_1639_v65                          | Listeria_monocytogenes_1639_v166 | 0.9451 |
| Listeria_monocytogenes_1639_v64                          | Listeria_monocytogenes_1639_v166 | 0.9539 |
| Listeria_monocytogenes_1639_v63                          | Listeria_monocytogenes_1639_v166 | 0.9291 |
| Listeria_monocytogenes_1639_v62                          | Listeria_monocytogenes_1639_v166 | 0.9472 |
| Listeria_monocytogenes_1639_v61                          | Listeria_monocytogenes_1639_v166 | 0.9451 |
| Listeria_monocytogenes_1639_v60                          | Listeria_monocytogenes_1639_v166 | 0.958  |
| Listeria_monocytogenes_1639_v5                           | Listeria_monocytogenes_1639_v166 | 0.8954 |
| Listeria_monocytogenes_1639_v59                          | Listeria_monocytogenes_1639_v166 | 0.9332 |
| Listeria_monocytogenes_1639_v58                          | Listeria_monocytogenes_1639_v166 | 0.9306 |
| Listeria_monocytogenes_1639_v57                          | Listeria_monocytogenes_1639_v166 | 0.9287 |
| Listeria_monocytogenes_1639_v56                          | Listeria_monocytogenes_1639_v166 | 0.9332 |
| Listeria_monocytogenes_1639_v55                          | Listeria_monocytogenes_1639_v166 | 0.9256 |
| Listeria_monocytogenes_1639_v54                          | Listeria_monocytogenes_1639_v166 | 0.9243 |
| Listeria_monocytogenes_1639_v53                          | Listeria_monocytogenes_1639_v166 | 0.955  |
| Listeria_monocytogenes_1639_v52                          | Listeria_monocytogenes_1639_v166 | 0.93   |
| Listeria_monocytogenes_1639_v51                          | Listeria_monocytogenes_1639_v166 | 0.9283 |



|                                                        |                                  |        |
|--------------------------------------------------------|----------------------------------|--------|
| Listeria_monocytogenes_1639_v50                        | Listeria_monocytogenes_1639_v166 | 0.9407 |
| Listeria_monocytogenes_1639_v4                         | Listeria_monocytogenes_1639_v166 | 0.9072 |
| Listeria_monocytogenes_1639_v49                        | Listeria_monocytogenes_1639_v166 | 0.9288 |
| Listeria_monocytogenes_1639_v48                        | Listeria_monocytogenes_1639_v166 | 0.9407 |
| Listeria_monocytogenes_1639_v47                        | Listeria_monocytogenes_1639_v166 | 0.9419 |
| Listeria_monocytogenes_1639_v46                        | Listeria_monocytogenes_1639_v166 | 0.9607 |
| Listeria_monocytogenes_1639_v45                        | Listeria_monocytogenes_1639_v166 | 0.9324 |
| Listeria_monocytogenes_1639_v44                        | Listeria_monocytogenes_1639_v166 | 0.9422 |
| Listeria_monocytogenes_1639_v43                        | Listeria_monocytogenes_1639_v166 | 0.9422 |
| Listeria_monocytogenes_1639_v42                        | Listeria_monocytogenes_1639_v166 | 0.9411 |
| Listeria_monocytogenes_1639_v41                        | Listeria_monocytogenes_1639_v166 | 0.925  |
| Listeria_monocytogenes_1639_v40                        | Listeria_monocytogenes_1639_v166 | 0.9457 |
| Listeria_monocytogenes_1639_v3                         | Listeria_monocytogenes_1639_v166 | 0.9076 |
| Listeria_monocytogenes_1639_v39                        | Listeria_monocytogenes_1639_v166 | 0.9283 |
| Listeria_monocytogenes_1639_v38                        | Listeria_monocytogenes_1639_v166 | 0.9421 |
| Listeria_monocytogenes_1639_v37                        | Listeria_monocytogenes_1639_v166 | 0.9383 |
| Listeria_monocytogenes_1639_v36                        | Listeria_monocytogenes_1639_v166 | 0.9433 |
| Listeria_monocytogenes_1639_v35                        | Listeria_monocytogenes_1639_v166 | 0.9464 |
| Listeria_monocytogenes_1639_v34                        | Listeria_monocytogenes_1639_v166 | 0.9527 |
| Listeria_monocytogenes_1639_v33                        | Listeria_monocytogenes_1639_v166 | 0.9281 |
| Listeria_monocytogenes_1639_v32                        | Listeria_monocytogenes_1639_v166 | 0.9368 |
| Listeria_monocytogenes_1639_v31                        | Listeria_monocytogenes_1639_v166 | 0.9531 |
| Listeria_monocytogenes_1639_v30                        | Listeria_monocytogenes_1639_v166 | 0.9333 |
| Listeria_monocytogenes_1639_v2                         | Listeria_monocytogenes_1639_v166 | 0.9002 |
| Listeria_monocytogenes_1639_v29                        | Listeria_monocytogenes_1639_v166 | 0.9319 |
| Listeria_monocytogenes_1639_v28                        | Listeria_monocytogenes_1639_v166 | 0.9361 |
| Listeria_monocytogenes_1639_v27                        | Listeria_monocytogenes_1639_v166 | 0.9274 |
| Listeria_monocytogenes_1639_v26                        | Listeria_monocytogenes_1639_v166 | 0.9271 |
| Listeria_monocytogenes_1639_v25                        | Listeria_monocytogenes_1639_v166 | 0.9267 |
| Listeria_monocytogenes_1639_v24                        | Listeria_monocytogenes_1639_v166 | 0.9237 |
| Listeria_monocytogenes_1639_v23                        | Listeria_monocytogenes_1639_v166 | 0.9237 |
| Listeria_monocytogenes_1639_v22                        | Listeria_monocytogenes_1639_v166 | 0.9295 |
| Listeria_monocytogenes_1639_v21                        | Listeria_monocytogenes_1639_v166 | 0.9237 |
| Listeria_monocytogenes_1639_v20                        | Listeria_monocytogenes_1639_v166 | 0.9285 |
| Listeria_monocytogenes_1639_v1                         | Listeria_monocytogenes_1639_v166 | 0.931  |
| Listeria_monocytogenes_1639_v19                        | Listeria_monocytogenes_1639_v166 | 0.9282 |
| Listeria_monocytogenes_1639_v198                       | Listeria_monocytogenes_1639_v166 | 0.9161 |
| Listeria_monocytogenes_1639_v197                       | Listeria_monocytogenes_1639_v166 | 0.942  |
| Listeria_monocytogenes_1639_v196                       | Listeria_monocytogenes_1639_v166 | 0.9444 |
| Listeria_monocytogenes_1639_v195                       | Listeria_monocytogenes_1639_v166 | 0.9533 |
| Listeria_monocytogenes_1639_v194                       | Listeria_monocytogenes_1639_v166 | 0.9538 |
| Listeria_monocytogenes_1639_v193                       | Listeria_monocytogenes_1639_v166 | 0.9542 |
| Listeria_monocytogenes_1639_v192                       | Listeria_monocytogenes_1639_v166 | 0.9048 |
| Listeria_monocytogenes_1639_v191                       | Listeria_monocytogenes_1639_v166 | 0.9789 |
| Listeria_monocytogenes_1639_v190                       | Listeria_monocytogenes_1639_v166 | 0.9743 |
| Listeria_monocytogenes_1639_v18                        | Listeria_monocytogenes_1639_v166 | 0.9228 |
| Listeria_monocytogenes_1639_v189                       | Listeria_monocytogenes_1639_v166 | 0.9735 |
| Listeria_monocytogenes_1639_v188                       | Listeria_monocytogenes_1639_v166 | 0.9699 |
| Listeria_monocytogenes_1639_v187                       | Listeria_monocytogenes_1639_v166 | 0.9739 |
| Listeria_monocytogenes_1639_v186                       | Listeria_monocytogenes_1639_v166 | 0.9746 |
| Listeria_monocytogenes_1639_v185                       | Listeria_monocytogenes_1639_v166 | 0.9743 |
| Listeria_monocytogenes_1639_v184                       | Listeria_monocytogenes_1639_v166 | 0.9739 |
| Listeria_monocytogenes_1639_v183                       | Listeria_monocytogenes_1639_v166 | 0.9739 |
| Listeria_monocytogenes_1639_v182                       | Listeria_monocytogenes_1639_v166 | 0.9762 |
| Listeria_monocytogenes_1639_v181                       | Listeria_monocytogenes_1639_v166 | 0.9271 |
| Listeria_monocytogenes_1639_v180                       | Listeria_monocytogenes_1639_v166 | 0.9271 |
| Listeria_monocytogenes_1639_v17                        | Listeria_monocytogenes_1639_v166 | 0.9228 |
| Listeria_monocytogenes_1639_v179                       | Listeria_monocytogenes_1639_v166 | 0.9707 |
| Listeria_monocytogenes_1639_v178                       | Listeria_monocytogenes_1639_v166 | 0.9762 |
| Listeria_monocytogenes_1639_v177                       | Listeria_monocytogenes_1639_v166 | 0.9513 |
| Listeria_monocytogenes_1639_v176                       | Listeria_monocytogenes_1639_v166 | 0.9515 |
| Listeria_monocytogenes_1639_v175                       | Listeria_monocytogenes_1639_v166 | 0.9645 |
| Listeria_monocytogenes_1639_v174                       | Listeria_monocytogenes_1639_v166 | 0.9766 |
| Listeria_monocytogenes_1639_v173                       | Listeria_monocytogenes_1639_v166 | 0.9529 |
| Listeria_monocytogenes_1639_v172                       | Listeria_monocytogenes_1639_v166 | 0.9423 |
| Listeria_monocytogenes_1639_v171                       | Listeria_monocytogenes_1639_v166 | 0.9593 |
| Listeria_monocytogenes_1639_v170                       | Listeria_monocytogenes_1639_v166 | 0.9667 |
| Listeria_monocytogenes_1639_v16                        | Listeria_monocytogenes_1639_v166 | 0.9282 |
| Listeria_monocytogenes_1639_v169                       | Listeria_monocytogenes_1639_v166 | 0.9668 |
| Listeria_monocytogenes_1639_v168                       | Listeria_monocytogenes_1639_v166 | 0.9988 |
| Listeria_monocytogenes_1639_v167                       | Listeria_monocytogenes_1639_v166 | 0.9694 |
| Listeria_monocytogenes_1639_v166                       | Listeria_monocytogenes_1639_v166 | 0.0696 |
| Listeria_welshimeri_1643                               | Listeria_monocytogenes_1639_v167 | 0.8772 |
| Listeria_welshimeri_serovar_6b_str_SLCC5334_386043     | Listeria_monocytogenes_1639_v167 | 0.8765 |
| Listeria_seeligeri_serovar_1_2b_str_SLCC3954_683837    | Listeria_monocytogenes_1639_v167 | 0.8915 |
| Listeria_seeligeri_FSL_S4-171_702452                   | Listeria_monocytogenes_1639_v167 | 0.8277 |
| Listeria_seeligeri_FSL_N1-067_702453                   | Listeria_monocytogenes_1639_v167 | 0.8352 |
| Listeria_seeligeri_1640_v1                             | Listeria_monocytogenes_1639_v167 | 0.8809 |
| Listeria_seeligeri_1640                                | Listeria_monocytogenes_1639_v167 | 0.8776 |
| Listeria_monocytogenes_WSLC1042_1457188                | Listeria_monocytogenes_1639_v167 | 0.9296 |
| Listeria_monocytogenes_WSLC1001_1457187                | Listeria_monocytogenes_1639_v167 | 0.9535 |
| Listeria_monocytogenes_SLCC7179_879090                 | Listeria_monocytogenes_1639_v167 | 0.9673 |
| Listeria_monocytogenes_SLCC5850_882096                 | Listeria_monocytogenes_1639_v167 | 0.9567 |
| Listeria_monocytogenes_SLCC2755_932919                 | Listeria_monocytogenes_1639_v167 | 0.929  |
| Listeria_monocytogenes_SLCC2540_879089                 | Listeria_monocytogenes_1639_v167 | 0.9325 |
| Listeria_monocytogenes_SLCC2479_882020                 | Listeria_monocytogenes_1639_v167 | 0.9516 |
| Listeria_monocytogenes_SLCC2378_879088                 | Listeria_monocytogenes_1639_v167 | 0.931  |
| Listeria_monocytogenes_SLCC2376_882097                 | Listeria_monocytogenes_1639_v167 | 0.9473 |
| Listeria_monocytogenes_SLCC2372_932920                 | Listeria_monocytogenes_1639_v167 | 0.9441 |
| Listeria_monocytogenes_serotype_4b_str_LL195_1230340   | Listeria_monocytogenes_1639_v167 | 0.9368 |
| Listeria_monocytogenes_serotype_4b_str_LIS0087_1134669 | Listeria_monocytogenes_1639_v167 | 0.9367 |

|                                                          |                                  |        |
|----------------------------------------------------------|----------------------------------|--------|
| Listeria_monocytogenes_serotype_4b_str_F2365_265669      | Listeria_monocytogenes_1639_v167 | 0.9368 |
| Listeria_monocytogenes_serotype_4b_str_CLIP_80459_568819 | Listeria_monocytogenes_1639_v167 | 0.9417 |
| Listeria_monocytogenes_serotype_4b_str_81-0861_1196161   | Listeria_monocytogenes_1639_v167 | 0.9246 |
| Listeria_monocytogenes_serotype_4b_str_81-0592_1196160   | Listeria_monocytogenes_1639_v167 | 0.9257 |
| Listeria_monocytogenes_serotype_4b_str_81-0558_1196159   | Listeria_monocytogenes_1639_v167 | 0.926  |
| Listeria_monocytogenes_serotype_4b_str_10-0809_1196162   | Listeria_monocytogenes_1639_v167 | 0.9257 |
| Listeria_monocytogenes_serotype_4b_str_02-6680_1196175   | Listeria_monocytogenes_1639_v167 | 0.938  |
| Listeria_monocytogenes_serotype_4b_str_02-6679_1196174   | Listeria_monocytogenes_1639_v167 | 0.938  |
| Listeria_monocytogenes_serotype_4b_str_02-1792_1196173   | Listeria_monocytogenes_1639_v167 | 0.9272 |
| Listeria_monocytogenes_serotype_4b_str_02-1289_1196172   | Listeria_monocytogenes_1639_v167 | 0.9272 |
| Listeria_monocytogenes_serotype_4b_str_02-1103_1196171   | Listeria_monocytogenes_1639_v167 | 0.9272 |
| Listeria_monocytogenes_serotype_3c_str_10-5027_1196195   | Listeria_monocytogenes_1639_v167 | 0.9512 |
| Listeria_monocytogenes_serotype_1_2c_str_10-5026_1196194 | Listeria_monocytogenes_1639_v167 | 0.9523 |
| Listeria_monocytogenes_serotype_1_2c_str_10-5025_1196193 | Listeria_monocytogenes_1639_v167 | 0.9523 |
| Listeria_monocytogenes_serotype_1_2b_str_10-0811_1196164 | Listeria_monocytogenes_1639_v167 | 0.9265 |
| Listeria_monocytogenes_serotype_1_2b_str_10-0810_1196163 | Listeria_monocytogenes_1639_v167 | 0.9265 |
| Listeria_monocytogenes_serotype_1_2a_str_99-6370_1196179 | Listeria_monocytogenes_1639_v167 | 0.9406 |
| Listeria_monocytogenes_serotype_1_2a_str_98-2035_1196178 | Listeria_monocytogenes_1639_v167 | 0.9406 |
| Listeria_monocytogenes_serotype_1_2a_str_95-0093_1196177 | Listeria_monocytogenes_1639_v167 | 0.9463 |
| Listeria_monocytogenes_serotype_1_2a_str_88-0478_1196176 | Listeria_monocytogenes_1639_v167 | 0.9458 |
| Listeria_monocytogenes_serotype_1_2a_str_10-5024_1196192 | Listeria_monocytogenes_1639_v167 | 0.9466 |
| Listeria_monocytogenes_serotype_1_2a_str_10-4758_1196168 | Listeria_monocytogenes_1639_v167 | 0.9537 |
| Listeria_monocytogenes_serotype_1_2a_str_10-4754_1196167 | Listeria_monocytogenes_1639_v167 | 0.9537 |
| Listeria_monocytogenes_serotype_1_2a_str_10-1321_1196191 | Listeria_monocytogenes_1639_v167 | 0.9466 |
| Listeria_monocytogenes_serotype_1_2a_str_10-1047_1196190 | Listeria_monocytogenes_1639_v167 | 0.9466 |
| Listeria_monocytogenes_serotype_1_2a_str_10-1046_1196189 | Listeria_monocytogenes_1639_v167 | 0.9466 |
| Listeria_monocytogenes_serotype_1_2a_str_10-0934_1196170 | Listeria_monocytogenes_1639_v167 | 0.9682 |
| Listeria_monocytogenes_serotype_1_2a_str_10-0933_1196169 | Listeria_monocytogenes_1639_v167 | 0.9682 |
| Listeria_monocytogenes_serotype_1_2a_str_10-0815_1196188 | Listeria_monocytogenes_1639_v167 | 0.942  |
| Listeria_monocytogenes_serotype_1_2a_str_10-0814_1196187 | Listeria_monocytogenes_1639_v167 | 0.9463 |
| Listeria_monocytogenes_serotype_1_2a_str_10-0813_1196166 | Listeria_monocytogenes_1639_v167 | 0.9529 |
| Listeria_monocytogenes_serotype_1_2a_str_10-0812_1196165 | Listeria_monocytogenes_1639_v167 | 0.9529 |
| Listeria_monocytogenes_serotype_1_2a_str_08-7669_1196186 | Listeria_monocytogenes_1639_v167 | 0.9552 |
| Listeria_monocytogenes_serotype_1_2a_str_08-7374_1196185 | Listeria_monocytogenes_1639_v167 | 0.9466 |
| Listeria_monocytogenes_serotype_1_2a_str_08-6997_1196184 | Listeria_monocytogenes_1639_v167 | 0.942  |
| Listeria_monocytogenes_serotype_1_2a_str_08-6569_1196183 | Listeria_monocytogenes_1639_v167 | 0.942  |
| Listeria_monocytogenes_serotype_1_2a_str_08-6056_1196182 | Listeria_monocytogenes_1639_v167 | 0.942  |
| Listeria_monocytogenes_serotype_1_2a_str_04-5457_1196181 | Listeria_monocytogenes_1639_v167 | 0.9466 |
| Listeria_monocytogenes_serotype_1_2a_str_02-5993_1196180 | Listeria_monocytogenes_1639_v167 | 0.9463 |
| Listeria_monocytogenes_R479a_1437838                     | Listeria_monocytogenes_1639_v167 | 0.9437 |
| Listeria_monocytogenes_N53-1_1234142                     | Listeria_monocytogenes_1639_v167 | 0.9111 |
| Listeria_monocytogenes_M7_1030009                        | Listeria_monocytogenes_1639_v167 | 0.9066 |
| Listeria_monocytogenes_LO28_393132                       | Listeria_monocytogenes_1639_v167 | 0.9456 |
| Listeria_monocytogenes_L99_563174                        | Listeria_monocytogenes_1639_v167 | 0.9072 |
| Listeria_monocytogenes_L312_882094                       | Listeria_monocytogenes_1639_v167 | 0.9417 |
| Listeria_monocytogenes_J1816_930781                      | Listeria_monocytogenes_1639_v167 | 0.9301 |
| Listeria_monocytogenes_J1-220_930782                     | Listeria_monocytogenes_1639_v167 | 0.9203 |
| Listeria_monocytogenes_J0161_393130                      | Listeria_monocytogenes_1639_v167 | 0.9622 |
| Listeria_monocytogenes_HCC23_552536                      | Listeria_monocytogenes_1639_v167 | 0.9069 |
| Listeria_monocytogenes_FSL_R2-561_393126                 | Listeria_monocytogenes_1639_v167 | 0.9494 |
| Listeria_monocytogenes_FSL_J1-208_393119                 | Listeria_monocytogenes_1639_v167 | 0.9085 |
| Listeria_monocytogenes_FSL_J1-175_393118                 | Listeria_monocytogenes_1639_v167 | 0.938  |
| Listeria_monocytogenes_Finland_1998_393127               | Listeria_monocytogenes_1639_v167 | 0.9593 |
| Listeria_monocytogenes_EGD-e_169963_v1                   | Listeria_monocytogenes_1639_v167 | 0.9553 |
| Listeria_monocytogenes_EGD-e_169963                      | Listeria_monocytogenes_1639_v167 | 0.9553 |
| Listeria_monocytogenes_EGD_1334565                       | Listeria_monocytogenes_1639_v167 | 0.9575 |
| Listeria_monocytogenes_CFSAN002349_1299895               | Listeria_monocytogenes_1639_v167 | 0.94   |
| Listeria_monocytogenes_ATCC_19117_882095_v1              | Listeria_monocytogenes_1639_v167 | 0.9358 |
| Listeria_monocytogenes_ATCC_19117_882095                 | Listeria_monocytogenes_1639_v167 | 0.9358 |
| Listeria_monocytogenes_6179_1288295                      | Listeria_monocytogenes_1639_v167 | 0.9463 |
| Listeria_monocytogenes_1639_v9                           | Listeria_monocytogenes_1639_v167 | 0.9242 |
| Listeria_monocytogenes_1639_v99                          | Listeria_monocytogenes_1639_v167 | 0.9313 |
| Listeria_monocytogenes_1639_v98                          | Listeria_monocytogenes_1639_v167 | 0.958  |
| Listeria_monocytogenes_1639_v97                          | Listeria_monocytogenes_1639_v167 | 0.9403 |
| Listeria_monocytogenes_1639_v96                          | Listeria_monocytogenes_1639_v167 | 0.9306 |
| Listeria_monocytogenes_1639_v95                          | Listeria_monocytogenes_1639_v167 | 0.9306 |
| Listeria_monocytogenes_1639_v94                          | Listeria_monocytogenes_1639_v167 | 0.931  |
| Listeria_monocytogenes_1639_v93                          | Listeria_monocytogenes_1639_v167 | 0.9395 |
| Listeria_monocytogenes_1639_v92                          | Listeria_monocytogenes_1639_v167 | 0.9321 |
| Listeria_monocytogenes_1639_v91                          | Listeria_monocytogenes_1639_v167 | 0.9233 |
| Listeria_monocytogenes_1639_v90                          | Listeria_monocytogenes_1639_v167 | 0.958  |
| Listeria_monocytogenes_1639_v8                           | Listeria_monocytogenes_1639_v167 | 0.9335 |
| Listeria_monocytogenes_1639_v89                          | Listeria_monocytogenes_1639_v167 | 0.9343 |
| Listeria_monocytogenes_1639_v88                          | Listeria_monocytogenes_1639_v167 | 0.9609 |
| Listeria_monocytogenes_1639_v87                          | Listeria_monocytogenes_1639_v167 | 0.9494 |
| Listeria_monocytogenes_1639_v86                          | Listeria_monocytogenes_1639_v167 | 0.949  |
| Listeria_monocytogenes_1639_v85                          | Listeria_monocytogenes_1639_v167 | 0.924  |
| Listeria_monocytogenes_1639_v84                          | Listeria_monocytogenes_1639_v167 | 0.9585 |
| Listeria_monocytogenes_1639_v83                          | Listeria_monocytogenes_1639_v167 | 0.9301 |
| Listeria_monocytogenes_1639_v82                          | Listeria_monocytogenes_1639_v167 | 0.9294 |
| Listeria_monocytogenes_1639_v81                          | Listeria_monocytogenes_1639_v167 | 0.9503 |
| Listeria_monocytogenes_1639_v80                          | Listeria_monocytogenes_1639_v167 | 0.9365 |
| Listeria_monocytogenes_1639_v7                           | Listeria_monocytogenes_1639_v167 | 0.9335 |
| Listeria_monocytogenes_1639_v79                          | Listeria_monocytogenes_1639_v167 | 0.9485 |
| Listeria_monocytogenes_1639_v78                          | Listeria_monocytogenes_1639_v167 | 0.9503 |
| Listeria_monocytogenes_1639_v77                          | Listeria_monocytogenes_1639_v167 | 0.9581 |
| Listeria_monocytogenes_1639_v76                          | Listeria_monocytogenes_1639_v167 | 0.9499 |
| Listeria_monocytogenes_1639_v75                          | Listeria_monocytogenes_1639_v167 | 0.9072 |
| Listeria_monocytogenes_1639_v74                          | Listeria_monocytogenes_1639_v167 | 0.946  |
| Listeria_monocytogenes_1639_v73                          | Listeria_monocytogenes_1639_v167 | 0.9399 |
| Listeria_monocytogenes_1639_v72                          | Listeria_monocytogenes_1639_v167 | 0.9278 |

[illegible]

|                                                          |                                  |        |
|----------------------------------------------------------|----------------------------------|--------|
| Listeria_monocytogenes_1639_v169                         | Listeria_monocytogenes_1639_v167 | 0.9588 |
| Listeria_monocytogenes_1639_v168                         | Listeria_monocytogenes_1639_v167 | 0.969  |
| Listeria_monocytogenes_1639_v167                         | Listeria_monocytogenes_1639_v167 | 0.0651 |
| Listeria_welshimeri_1643                                 | Listeria_monocytogenes_1639_v168 | 0.8829 |
| Listeria_welshimeri_serovar_6b_str_SLCC5334_386043       | Listeria_monocytogenes_1639_v168 | 0.8822 |
| Listeria_seeligeri_serovar_1_2b_str_SLCC3954_683837      | Listeria_monocytogenes_1639_v168 | 0.8938 |
| Listeria_seeligeri_FSL_S4-171_702452                     | Listeria_monocytogenes_1639_v168 | 0.8222 |
| Listeria_seeligeri_FSL_N1-067_702453                     | Listeria_monocytogenes_1639_v168 | 0.8372 |
| Listeria_seeligeri_1640_v1                               | Listeria_monocytogenes_1639_v168 | 0.8878 |
| Listeria_seeligeri_1640                                  | Listeria_monocytogenes_1639_v168 | 0.8851 |
| Listeria_monocytogenes_WSLC1042_1457188                  | Listeria_monocytogenes_1639_v168 | 0.9378 |
| Listeria_monocytogenes_WSLC1001_1457187                  | Listeria_monocytogenes_1639_v168 | 0.956  |
| Listeria_monocytogenes_SLCC7179_879090                   | Listeria_monocytogenes_1639_v168 | 0.9645 |
| Listeria_monocytogenes_SLCC5850_882096                   | Listeria_monocytogenes_1639_v168 | 0.9604 |
| Listeria_monocytogenes_SLCC2755_932919                   | Listeria_monocytogenes_1639_v168 | 0.9405 |
| Listeria_monocytogenes_SLCC2540_879089                   | Listeria_monocytogenes_1639_v168 | 0.9376 |
| Listeria_monocytogenes_SLCC2479_882020                   | Listeria_monocytogenes_1639_v168 | 0.946  |
| Listeria_monocytogenes_SLCC2378_879088                   | Listeria_monocytogenes_1639_v168 | 0.9388 |
| Listeria_monocytogenes_SLCC2376_882097                   | Listeria_monocytogenes_1639_v168 | 0.953  |
| Listeria_monocytogenes_SLCC2372_932920                   | Listeria_monocytogenes_1639_v168 | 0.9393 |
| Listeria_monocytogenes_serotype_4b_str_LL195_1230340     | Listeria_monocytogenes_1639_v168 | 0.945  |
| Listeria_monocytogenes_serotype_4b_str_LIS0087_1134669   | Listeria_monocytogenes_1639_v168 | 0.9364 |
| Listeria_monocytogenes_serotype_4b_str_F2365_265669      | Listeria_monocytogenes_1639_v168 | 0.945  |
| Listeria_monocytogenes_serotype_4b_str_CLIP_80459_568819 | Listeria_monocytogenes_1639_v168 | 0.9496 |
| Listeria_monocytogenes_serotype_4b_str_81-0861_1196161   | Listeria_monocytogenes_1639_v168 | 0.9277 |
| Listeria_monocytogenes_serotype_4b_str_81-0592_1196160   | Listeria_monocytogenes_1639_v168 | 0.9288 |
| Listeria_monocytogenes_serotype_4b_str_81-0558_1196159   | Listeria_monocytogenes_1639_v168 | 0.9295 |
| Listeria_monocytogenes_serotype_4b_str_10-0809_1196162   | Listeria_monocytogenes_1639_v168 | 0.9288 |
| Listeria_monocytogenes_serotype_4b_str_02-6680_1196175   | Listeria_monocytogenes_1639_v168 | 0.9482 |
| Listeria_monocytogenes_serotype_4b_str_02-6679_1196174   | Listeria_monocytogenes_1639_v168 | 0.9482 |
| Listeria_monocytogenes_serotype_4b_str_02-1792_1196173   | Listeria_monocytogenes_1639_v168 | 0.9292 |
| Listeria_monocytogenes_serotype_4b_str_02-1289_1196172   | Listeria_monocytogenes_1639_v168 | 0.9292 |
| Listeria_monocytogenes_serotype_4b_str_02-1103_1196171   | Listeria_monocytogenes_1639_v168 | 0.9292 |
| Listeria_monocytogenes_serotype_3c_str_10-5027_1196195   | Listeria_monocytogenes_1639_v168 | 0.9453 |
| Listeria_monocytogenes_serotype_1_2c_str_10-5026_1196194 | Listeria_monocytogenes_1639_v168 | 0.9464 |
| Listeria_monocytogenes_serotype_1_2c_str_10-5025_1196193 | Listeria_monocytogenes_1639_v168 | 0.9464 |
| Listeria_monocytogenes_serotype_1_2b_str_10-0811_1196164 | Listeria_monocytogenes_1639_v168 | 0.9277 |
| Listeria_monocytogenes_serotype_1_2b_str_10-0810_1196163 | Listeria_monocytogenes_1639_v168 | 0.9277 |
| Listeria_monocytogenes_serotype_1_2a_str_99-6370_1196179 | Listeria_monocytogenes_1639_v168 | 0.9355 |
| Listeria_monocytogenes_serotype_1_2a_str_98-2035_1196178 | Listeria_monocytogenes_1639_v168 | 0.9355 |
| Listeria_monocytogenes_serotype_1_2a_str_95-0093_1196177 | Listeria_monocytogenes_1639_v168 | 0.9415 |
| Listeria_monocytogenes_serotype_1_2a_str_88-0478_1196176 | Listeria_monocytogenes_1639_v168 | 0.9407 |
| Listeria_monocytogenes_serotype_1_2a_str_10-5024_1196192 | Listeria_monocytogenes_1639_v168 | 0.9419 |
| Listeria_monocytogenes_serotype_1_2a_str_10-4758_1196168 | Listeria_monocytogenes_1639_v168 | 0.9578 |
| Listeria_monocytogenes_serotype_1_2a_str_10-4754_1196167 | Listeria_monocytogenes_1639_v168 | 0.9578 |
| Listeria_monocytogenes_serotype_1_2a_str_10-1321_1196191 | Listeria_monocytogenes_1639_v168 | 0.9419 |
| Listeria_monocytogenes_serotype_1_2a_str_10-1047_1196190 | Listeria_monocytogenes_1639_v168 | 0.9422 |
| Listeria_monocytogenes_serotype_1_2a_str_10-1046_1196189 | Listeria_monocytogenes_1639_v168 | 0.9422 |
| Listeria_monocytogenes_serotype_1_2a_str_10-0934_1196170 | Listeria_monocytogenes_1639_v168 | 0.9732 |
| Listeria_monocytogenes_serotype_1_2a_str_10-0933_1196169 | Listeria_monocytogenes_1639_v168 | 0.9732 |
| Listeria_monocytogenes_serotype_1_2a_str_10-0815_1196188 | Listeria_monocytogenes_1639_v168 | 0.9369 |
| Listeria_monocytogenes_serotype_1_2a_str_10-0814_1196187 | Listeria_monocytogenes_1639_v168 | 0.9415 |
| Listeria_monocytogenes_serotype_1_2a_str_10-0813_1196166 | Listeria_monocytogenes_1639_v168 | 0.9531 |
| Listeria_monocytogenes_serotype_1_2a_str_10-0812_1196165 | Listeria_monocytogenes_1639_v168 | 0.9531 |
| Listeria_monocytogenes_serotype_1_2a_str_08-7669_1196186 | Listeria_monocytogenes_1639_v168 | 0.9516 |
| Listeria_monocytogenes_serotype_1_2a_str_08-7374_1196185 | Listeria_monocytogenes_1639_v168 | 0.9419 |
| Listeria_monocytogenes_serotype_1_2a_str_08-6997_1196184 | Listeria_monocytogenes_1639_v168 | 0.9369 |
| Listeria_monocytogenes_serotype_1_2a_str_08-6569_1196183 | Listeria_monocytogenes_1639_v168 | 0.9369 |
| Listeria_monocytogenes_serotype_1_2a_str_08-6056_1196182 | Listeria_monocytogenes_1639_v168 | 0.9369 |
| Listeria_monocytogenes_serotype_1_2a_str_04-5457_1196181 | Listeria_monocytogenes_1639_v168 | 0.9419 |
| Listeria_monocytogenes_serotype_1_2a_str_02-5993_1196180 | Listeria_monocytogenes_1639_v168 | 0.9415 |
| Listeria_monocytogenes_R479a_1437838                     | Listeria_monocytogenes_1639_v168 | 0.9416 |
| Listeria_monocytogenes_N53-1_1234142                     | Listeria_monocytogenes_1639_v168 | 0.9133 |
| Listeria_monocytogenes_M7_1030009                        | Listeria_monocytogenes_1639_v168 | 0.9096 |
| Listeria_monocytogenes_LO28_393132                       | Listeria_monocytogenes_1639_v168 | 0.9446 |
| Listeria_monocytogenes_L99_563174                        | Listeria_monocytogenes_1639_v168 | 0.9103 |
| Listeria_monocytogenes_L312_882094                       | Listeria_monocytogenes_1639_v168 | 0.9496 |
| Listeria_monocytogenes_J1816_930781                      | Listeria_monocytogenes_1639_v168 | 0.9317 |
| Listeria_monocytogenes_J1-220_930782                     | Listeria_monocytogenes_1639_v168 | 0.9233 |
| Listeria_monocytogenes_J0161_393130                      | Listeria_monocytogenes_1639_v168 | 0.9552 |
| Listeria_monocytogenes_HCC23_552536                      | Listeria_monocytogenes_1639_v168 | 0.9095 |
| Listeria_monocytogenes_FSL_R2-561_393126                 | Listeria_monocytogenes_1639_v168 | 0.9446 |
| Listeria_monocytogenes_FSL_J1-208_393119                 | Listeria_monocytogenes_1639_v168 | 0.91   |
| Listeria_monocytogenes_FSL_J1-175_393118                 | Listeria_monocytogenes_1639_v168 | 0.9408 |
| Listeria_monocytogenes_Finland_1998_393127               | Listeria_monocytogenes_1639_v168 | 0.9712 |
| Listeria_monocytogenes_EGD-e_169963_v1                   | Listeria_monocytogenes_1639_v168 | 0.9544 |
| Listeria_monocytogenes_EGD-e_169963                      | Listeria_monocytogenes_1639_v168 | 0.9544 |
| Listeria_monocytogenes_EGD_1334565                       | Listeria_monocytogenes_1639_v168 | 0.9612 |
| Listeria_monocytogenes_CFSAN002349_1299895               | Listeria_monocytogenes_1639_v168 | 0.9474 |
| Listeria_monocytogenes_ATCC_19117_882095_v1              | Listeria_monocytogenes_1639_v168 | 0.9433 |
| Listeria_monocytogenes_ATCC_19117_882095                 | Listeria_monocytogenes_1639_v168 | 0.9433 |
| Listeria_monocytogenes_6179_1288295                      | Listeria_monocytogenes_1639_v168 | 0.9375 |
| Listeria_monocytogenes_1639_v9                           | Listeria_monocytogenes_1639_v168 | 0.912  |
| Listeria_monocytogenes_1639_v99                          | Listeria_monocytogenes_1639_v168 | 0.9333 |
| Listeria_monocytogenes_1639_v98                          | Listeria_monocytogenes_1639_v168 | 0.9438 |
| Listeria_monocytogenes_1639_v97                          | Listeria_monocytogenes_1639_v168 | 0.9373 |
| Listeria_monocytogenes_1639_v96                          | Listeria_monocytogenes_1639_v168 | 0.9322 |
| Listeria_monocytogenes_1639_v95                          | Listeria_monocytogenes_1639_v168 | 0.9322 |
| Listeria_monocytogenes_1639_v94                          | Listeria_monocytogenes_1639_v168 | 0.9326 |
| Listeria_monocytogenes_1639_v93                          | Listeria_monocytogenes_1639_v168 | 0.949  |
| Listeria_monocytogenes_1639_v92                          | Listeria_monocytogenes_1639_v168 | 0.9329 |

[illegible]

|                                                          |                                  |        |
|----------------------------------------------------------|----------------------------------|--------|
| Listeria_monocytogenes_1639_v189                         | Listeria_monocytogenes_1639_v168 | 0.9731 |
| Listeria_monocytogenes_1639_v188                         | Listeria_monocytogenes_1639_v168 | 0.9695 |
| Listeria_monocytogenes_1639_v187                         | Listeria_monocytogenes_1639_v168 | 0.9735 |
| Listeria_monocytogenes_1639_v186                         | Listeria_monocytogenes_1639_v168 | 0.9743 |
| Listeria_monocytogenes_1639_v185                         | Listeria_monocytogenes_1639_v168 | 0.9739 |
| Listeria_monocytogenes_1639_v184                         | Listeria_monocytogenes_1639_v168 | 0.9735 |
| Listeria_monocytogenes_1639_v183                         | Listeria_monocytogenes_1639_v168 | 0.9735 |
| Listeria_monocytogenes_1639_v182                         | Listeria_monocytogenes_1639_v168 | 0.9758 |
| Listeria_monocytogenes_1639_v181                         | Listeria_monocytogenes_1639_v168 | 0.9268 |
| Listeria_monocytogenes_1639_v180                         | Listeria_monocytogenes_1639_v168 | 0.9268 |
| Listeria_monocytogenes_1639_v17                          | Listeria_monocytogenes_1639_v168 | 0.9224 |
| Listeria_monocytogenes_1639_v179                         | Listeria_monocytogenes_1639_v168 | 0.9703 |
| Listeria_monocytogenes_1639_v178                         | Listeria_monocytogenes_1639_v168 | 0.9758 |
| Listeria_monocytogenes_1639_v177                         | Listeria_monocytogenes_1639_v168 | 0.9509 |
| Listeria_monocytogenes_1639_v176                         | Listeria_monocytogenes_1639_v168 | 0.9511 |
| Listeria_monocytogenes_1639_v175                         | Listeria_monocytogenes_1639_v168 | 0.9641 |
| Listeria_monocytogenes_1639_v174                         | Listeria_monocytogenes_1639_v168 | 0.9763 |
| Listeria_monocytogenes_1639_v173                         | Listeria_monocytogenes_1639_v168 | 0.9525 |
| Listeria_monocytogenes_1639_v172                         | Listeria_monocytogenes_1639_v168 | 0.942  |
| Listeria_monocytogenes_1639_v171                         | Listeria_monocytogenes_1639_v168 | 0.959  |
| Listeria_monocytogenes_1639_v170                         | Listeria_monocytogenes_1639_v168 | 0.9663 |
| Listeria_monocytogenes_1639_v16                          | Listeria_monocytogenes_1639_v168 | 0.9279 |
| Listeria_monocytogenes_1639_v169                         | Listeria_monocytogenes_1639_v168 | 0.9664 |
| Listeria_monocytogenes_1639_v168                         | Listeria_monocytogenes_1639_v168 | 0.0692 |
| Listeria_welshimeri_1643                                 | Listeria_monocytogenes_1639_v169 | 0.882  |
| Listeria_welshimeri_serovar_6b_str_SLCC5334_386043       | Listeria_monocytogenes_1639_v169 | 0.8817 |
| Listeria_seeligeri_serovar_1_2b_str_SLCC3954_683837      | Listeria_monocytogenes_1639_v169 | 0.885  |
| Listeria_seeligeri_FSL_S4-171_702452                     | Listeria_monocytogenes_1639_v169 | 0.8193 |
| Listeria_seeligeri_FSL_N1-067_702453                     | Listeria_monocytogenes_1639_v169 | 0.8361 |
| Listeria_seeligeri_1640_v1                               | Listeria_monocytogenes_1639_v169 | 0.8861 |
| Listeria_seeligeri_1640                                  | Listeria_monocytogenes_1639_v169 | 0.8797 |
| Listeria_monocytogenes_WSLC1042_1457188                  | Listeria_monocytogenes_1639_v169 | 0.9366 |
| Listeria_monocytogenes_WSLC1001_1457187                  | Listeria_monocytogenes_1639_v169 | 0.9715 |
| Listeria_monocytogenes_SLCC7179_879090                   | Listeria_monocytogenes_1639_v169 | 0.9604 |
| Listeria_monocytogenes_SLCC5850_882096                   | Listeria_monocytogenes_1639_v169 | 0.9729 |
| Listeria_monocytogenes_SLCC2755_932919                   | Listeria_monocytogenes_1639_v169 | 0.9378 |
| Listeria_monocytogenes_SLCC2540_879089                   | Listeria_monocytogenes_1639_v169 | 0.9619 |
| Listeria_monocytogenes_SLCC2479_882020                   | Listeria_monocytogenes_1639_v169 | 0.9607 |
| Listeria_monocytogenes_SLCC2378_879088                   | Listeria_monocytogenes_1639_v169 | 0.9376 |
| Listeria_monocytogenes_SLCC2376_882097                   | Listeria_monocytogenes_1639_v169 | 0.9423 |
| Listeria_monocytogenes_SLCC2372_932920                   | Listeria_monocytogenes_1639_v169 | 0.9535 |
| Listeria_monocytogenes_serotype_4b_str_LL195_1230340     | Listeria_monocytogenes_1639_v169 | 0.9438 |
| Listeria_monocytogenes_serotype_4b_str_LIS0087_1134669   | Listeria_monocytogenes_1639_v169 | 0.9498 |
| Listeria_monocytogenes_serotype_4b_str_F2365_265669      | Listeria_monocytogenes_1639_v169 | 0.9438 |
| Listeria_monocytogenes_serotype_4b_str_CLIP_80459_568819 | Listeria_monocytogenes_1639_v169 | 0.951  |
| Listeria_monocytogenes_serotype_4b_str_81-0861_1196161   | Listeria_monocytogenes_1639_v169 | 0.9281 |
| Listeria_monocytogenes_serotype_4b_str_81-0592_1196160   | Listeria_monocytogenes_1639_v169 | 0.9292 |
| Listeria_monocytogenes_serotype_4b_str_81-0558_1196159   | Listeria_monocytogenes_1639_v169 | 0.9295 |
| Listeria_monocytogenes_serotype_4b_str_10-0809_1196162   | Listeria_monocytogenes_1639_v169 | 0.9292 |
| Listeria_monocytogenes_serotype_4b_str_02-6680_1196175   | Listeria_monocytogenes_1639_v169 | 0.9477 |
| Listeria_monocytogenes_serotype_4b_str_02-6679_1196174   | Listeria_monocytogenes_1639_v169 | 0.9477 |
| Listeria_monocytogenes_serotype_4b_str_02-1792_1196173   | Listeria_monocytogenes_1639_v169 | 0.9311 |
| Listeria_monocytogenes_serotype_4b_str_02-1289_1196172   | Listeria_monocytogenes_1639_v169 | 0.9311 |
| Listeria_monocytogenes_serotype_4b_str_02-1103_1196171   | Listeria_monocytogenes_1639_v169 | 0.9311 |
| Listeria_monocytogenes_serotype_3c_str_10-5027_1196195   | Listeria_monocytogenes_1639_v169 | 0.9607 |
| Listeria_monocytogenes_serotype_1_2c_str_10-5026_1196194 | Listeria_monocytogenes_1639_v169 | 0.9611 |
| Listeria_monocytogenes_serotype_1_2c_str_10-5025_1196193 | Listeria_monocytogenes_1639_v169 | 0.9611 |
| Listeria_monocytogenes_serotype_1_2b_str_10-0811_1196164 | Listeria_monocytogenes_1639_v169 | 0.9447 |
| Listeria_monocytogenes_serotype_1_2b_str_10-0810_1196163 | Listeria_monocytogenes_1639_v169 | 0.9447 |
| Listeria_monocytogenes_serotype_1_2a_str_99-6370_1196179 | Listeria_monocytogenes_1639_v169 | 0.9515 |
| Listeria_monocytogenes_serotype_1_2a_str_98-2035_1196178 | Listeria_monocytogenes_1639_v169 | 0.9515 |
| Listeria_monocytogenes_serotype_1_2a_str_95-0093_1196177 | Listeria_monocytogenes_1639_v169 | 0.9568 |
| Listeria_monocytogenes_serotype_1_2a_str_88-0478_1196176 | Listeria_monocytogenes_1639_v169 | 0.9553 |
| Listeria_monocytogenes_serotype_1_2a_str_10-5024_1196192 | Listeria_monocytogenes_1639_v169 | 0.9572 |
| Listeria_monocytogenes_serotype_1_2a_str_10-4758_1196168 | Listeria_monocytogenes_1639_v169 | 0.9775 |
| Listeria_monocytogenes_serotype_1_2a_str_10-4754_1196167 | Listeria_monocytogenes_1639_v169 | 0.9779 |
| Listeria_monocytogenes_serotype_1_2a_str_10-1321_1196191 | Listeria_monocytogenes_1639_v169 | 0.9572 |
| Listeria_monocytogenes_serotype_1_2a_str_10-1047_1196190 | Listeria_monocytogenes_1639_v169 | 0.9572 |
| Listeria_monocytogenes_serotype_1_2a_str_10-1046_1196189 | Listeria_monocytogenes_1639_v169 | 0.9572 |
| Listeria_monocytogenes_serotype_1_2a_str_10-0934_1196170 | Listeria_monocytogenes_1639_v169 | 0.971  |
| Listeria_monocytogenes_serotype_1_2a_str_10-0933_1196169 | Listeria_monocytogenes_1639_v169 | 0.971  |
| Listeria_monocytogenes_serotype_1_2a_str_10-0815_1196188 | Listeria_monocytogenes_1639_v169 | 0.9526 |
| Listeria_monocytogenes_serotype_1_2a_str_10-0814_1196187 | Listeria_monocytogenes_1639_v169 | 0.9572 |
| Listeria_monocytogenes_serotype_1_2a_str_10-0813_1196166 | Listeria_monocytogenes_1639_v169 | 0.967  |
| Listeria_monocytogenes_serotype_1_2a_str_10-0812_1196165 | Listeria_monocytogenes_1639_v169 | 0.967  |
| Listeria_monocytogenes_serotype_1_2a_str_08-7669_1196186 | Listeria_monocytogenes_1639_v169 | 0.9526 |
| Listeria_monocytogenes_serotype_1_2a_str_08-7374_1196185 | Listeria_monocytogenes_1639_v169 | 0.9572 |
| Listeria_monocytogenes_serotype_1_2a_str_08-6997_1196184 | Listeria_monocytogenes_1639_v169 | 0.9526 |
| Listeria_monocytogenes_serotype_1_2a_str_08-6569_1196183 | Listeria_monocytogenes_1639_v169 | 0.9526 |
| Listeria_monocytogenes_serotype_1_2a_str_08-6056_1196182 | Listeria_monocytogenes_1639_v169 | 0.9526 |
| Listeria_monocytogenes_serotype_1_2a_str_04-5457_1196181 | Listeria_monocytogenes_1639_v169 | 0.9572 |
| Listeria_monocytogenes_serotype_1_2a_str_02-5993_1196180 | Listeria_monocytogenes_1639_v169 | 0.9572 |
| Listeria_monocytogenes_R479a_1437838                     | Listeria_monocytogenes_1639_v169 | 0.9546 |
| Listeria_monocytogenes_N53-1_1234142                     | Listeria_monocytogenes_1639_v169 | 0.9108 |
| Listeria_monocytogenes_M7_1030009                        | Listeria_monocytogenes_1639_v169 | 0.9175 |
| Listeria_monocytogenes_LO28_393132                       | Listeria_monocytogenes_1639_v169 | 0.9592 |
| Listeria_monocytogenes_L99_563174                        | Listeria_monocytogenes_1639_v169 | 0.9179 |
| Listeria_monocytogenes_L312_882094                       | Listeria_monocytogenes_1639_v169 | 0.951  |
| Listeria_monocytogenes_J1816_930781                      | Listeria_monocytogenes_1639_v169 | 0.9287 |
| Listeria_monocytogenes_J1-220_930782                     | Listeria_monocytogenes_1639_v169 | 0.9335 |
| Listeria_monocytogenes_J0161_393130                      | Listeria_monocytogenes_1639_v169 | 0.9517 |



|                                             |                                  |        |
|---------------------------------------------|----------------------------------|--------|
| Listeria_monocytogenes_HCC23_552536         | Listeria_monocytogenes_1639_v169 | 0.9175 |
| Listeria_monocytogenes_FSL_R2-561_393126    | Listeria_monocytogenes_1639_v169 | 0.9596 |
| Listeria_monocytogenes_FSL_J1-208_393119    | Listeria_monocytogenes_1639_v169 | 0.9097 |
| Listeria_monocytogenes_FSL_J1-175_393118    | Listeria_monocytogenes_1639_v169 | 0.9568 |
| Listeria_monocytogenes_Finland_1998_393127  | Listeria_monocytogenes_1639_v169 | 0.9663 |
| Listeria_monocytogenes_EGD-e_169963_v1      | Listeria_monocytogenes_1639_v169 | 0.9565 |
| Listeria_monocytogenes_EGD-e_169963         | Listeria_monocytogenes_1639_v169 | 0.9565 |
| Listeria_monocytogenes_EGD_1334565          | Listeria_monocytogenes_1639_v169 | 0.9732 |
| Listeria_monocytogenes_CFSAN002349_1299895  | Listeria_monocytogenes_1639_v169 | 0.947  |
| Listeria_monocytogenes_ATCC_19117_882095_v1 | Listeria_monocytogenes_1639_v169 | 0.9432 |
| Listeria_monocytogenes_ATCC_19117_882095    | Listeria_monocytogenes_1639_v169 | 0.9428 |
| Listeria_monocytogenes_6179_1288295         | Listeria_monocytogenes_1639_v169 | 0.9494 |
| Listeria_monocytogenes_1639_v9              | Listeria_monocytogenes_1639_v169 | 0.9299 |
| Listeria_monocytogenes_1639_v99             | Listeria_monocytogenes_1639_v169 | 0.9291 |
| Listeria_monocytogenes_1639_v98             | Listeria_monocytogenes_1639_v169 | 0.9486 |
| Listeria_monocytogenes_1639_v97             | Listeria_monocytogenes_1639_v169 | 0.938  |
| Listeria_monocytogenes_1639_v96             | Listeria_monocytogenes_1639_v169 | 0.9284 |
| Listeria_monocytogenes_1639_v95             | Listeria_monocytogenes_1639_v169 | 0.9285 |
| Listeria_monocytogenes_1639_v94             | Listeria_monocytogenes_1639_v169 | 0.9292 |
| Listeria_monocytogenes_1639_v93             | Listeria_monocytogenes_1639_v169 | 0.9542 |
| Listeria_monocytogenes_1639_v92             | Listeria_monocytogenes_1639_v169 | 0.9303 |
| Listeria_monocytogenes_1639_v91             | Listeria_monocytogenes_1639_v169 | 0.9354 |
| Listeria_monocytogenes_1639_v90             | Listeria_monocytogenes_1639_v169 | 0.9486 |
| Listeria_monocytogenes_1639_v8              | Listeria_monocytogenes_1639_v169 | 0.9436 |
| Listeria_monocytogenes_1639_v89             | Listeria_monocytogenes_1639_v169 | 0.9405 |
| Listeria_monocytogenes_1639_v88             | Listeria_monocytogenes_1639_v169 | 0.964  |
| Listeria_monocytogenes_1639_v87             | Listeria_monocytogenes_1639_v169 | 0.9615 |
| Listeria_monocytogenes_1639_v86             | Listeria_monocytogenes_1639_v169 | 0.9611 |
| Listeria_monocytogenes_1639_v85             | Listeria_monocytogenes_1639_v169 | 0.9286 |
| Listeria_monocytogenes_1639_v84             | Listeria_monocytogenes_1639_v169 | 0.9765 |
| Listeria_monocytogenes_1639_v83             | Listeria_monocytogenes_1639_v169 | 0.9344 |
| Listeria_monocytogenes_1639_v82             | Listeria_monocytogenes_1639_v169 | 0.9337 |
| Listeria_monocytogenes_1639_v81             | Listeria_monocytogenes_1639_v169 | 0.9621 |
| Listeria_monocytogenes_1639_v80             | Listeria_monocytogenes_1639_v169 | 0.9499 |
| Listeria_monocytogenes_1639_v7              | Listeria_monocytogenes_1639_v169 | 0.9436 |
| Listeria_monocytogenes_1639_v79             | Listeria_monocytogenes_1639_v169 | 0.9584 |
| Listeria_monocytogenes_1639_v78             | Listeria_monocytogenes_1639_v169 | 0.9618 |
| Listeria_monocytogenes_1639_v77             | Listeria_monocytogenes_1639_v169 | 0.9551 |
| Listeria_monocytogenes_1639_v76             | Listeria_monocytogenes_1639_v169 | 0.9624 |
| Listeria_monocytogenes_1639_v75             | Listeria_monocytogenes_1639_v169 | 0.9179 |
| Listeria_monocytogenes_1639_v74             | Listeria_monocytogenes_1639_v169 | 0.9472 |
| Listeria_monocytogenes_1639_v73             | Listeria_monocytogenes_1639_v169 | 0.9546 |
| Listeria_monocytogenes_1639_v72             | Listeria_monocytogenes_1639_v169 | 0.9328 |
| Listeria_monocytogenes_1639_v71             | Listeria_monocytogenes_1639_v169 | 0.9506 |
| Listeria_monocytogenes_1639_v70             | Listeria_monocytogenes_1639_v169 | 0.9578 |
| Listeria_monocytogenes_1639_v6              | Listeria_monocytogenes_1639_v169 | 0.9433 |
| Listeria_monocytogenes_1639_v69             | Listeria_monocytogenes_1639_v169 | 0.9292 |
| Listeria_monocytogenes_1639_v68             | Listeria_monocytogenes_1639_v169 | 0.9526 |
| Listeria_monocytogenes_1639_v67             | Listeria_monocytogenes_1639_v169 | 0.9477 |
| Listeria_monocytogenes_1639_v66             | Listeria_monocytogenes_1639_v169 | 0.9699 |
| Listeria_monocytogenes_1639_v65             | Listeria_monocytogenes_1639_v169 | 0.9586 |
| Listeria_monocytogenes_1639_v64             | Listeria_monocytogenes_1639_v169 | 0.9659 |
| Listeria_monocytogenes_1639_v63             | Listeria_monocytogenes_1639_v169 | 0.9457 |
| Listeria_monocytogenes_1639_v62             | Listeria_monocytogenes_1639_v169 | 0.957  |
| Listeria_monocytogenes_1639_v61             | Listeria_monocytogenes_1639_v169 | 0.9586 |
| Listeria_monocytogenes_1639_v60             | Listeria_monocytogenes_1639_v169 | 0.9534 |
| Listeria_monocytogenes_1639_v5              | Listeria_monocytogenes_1639_v169 | 0.8982 |
| Listeria_monocytogenes_1639_v59             | Listeria_monocytogenes_1639_v169 | 0.942  |
| Listeria_monocytogenes_1639_v58             | Listeria_monocytogenes_1639_v169 | 0.9317 |
| Listeria_monocytogenes_1639_v57             | Listeria_monocytogenes_1639_v169 | 0.9257 |
| Listeria_monocytogenes_1639_v56             | Listeria_monocytogenes_1639_v169 | 0.9347 |
| Listeria_monocytogenes_1639_v55             | Listeria_monocytogenes_1639_v169 | 0.923  |
| Listeria_monocytogenes_1639_v54             | Listeria_monocytogenes_1639_v169 | 0.9255 |
| Listeria_monocytogenes_1639_v53             | Listeria_monocytogenes_1639_v169 | 0.9515 |
| Listeria_monocytogenes_1639_v52             | Listeria_monocytogenes_1639_v169 | 0.9399 |
| Listeria_monocytogenes_1639_v51             | Listeria_monocytogenes_1639_v169 | 0.9291 |
| Listeria_monocytogenes_1639_v50             | Listeria_monocytogenes_1639_v169 | 0.9557 |
| Listeria_monocytogenes_1639_v4              | Listeria_monocytogenes_1639_v169 | 0.911  |
| Listeria_monocytogenes_1639_v49             | Listeria_monocytogenes_1639_v169 | 0.9319 |
| Listeria_monocytogenes_1639_v48             | Listeria_monocytogenes_1639_v169 | 0.9557 |
| Listeria_monocytogenes_1639_v47             | Listeria_monocytogenes_1639_v169 | 0.9568 |
| Listeria_monocytogenes_1639_v46             | Listeria_monocytogenes_1639_v169 | 0.9523 |
| Listeria_monocytogenes_1639_v45             | Listeria_monocytogenes_1639_v169 | 0.9473 |
| Listeria_monocytogenes_1639_v44             | Listeria_monocytogenes_1639_v169 | 0.9572 |
| Listeria_monocytogenes_1639_v43             | Listeria_monocytogenes_1639_v169 |        |

|                                                          |                                  |        |
|----------------------------------------------------------|----------------------------------|--------|
| Listeria_monocytogenes_1639_v28                          | Listeria_monocytogenes_1639_v169 | 0.9514 |
| Listeria_monocytogenes_1639_v27                          | Listeria_monocytogenes_1639_v169 | 0.9419 |
| Listeria_monocytogenes_1639_v26                          | Listeria_monocytogenes_1639_v169 | 0.9412 |
| Listeria_monocytogenes_1639_v25                          | Listeria_monocytogenes_1639_v169 | 0.9412 |
| Listeria_monocytogenes_1639_v24                          | Listeria_monocytogenes_1639_v169 | 0.935  |
| Listeria_monocytogenes_1639_v23                          | Listeria_monocytogenes_1639_v169 | 0.9347 |
| Listeria_monocytogenes_1639_v22                          | Listeria_monocytogenes_1639_v169 | 0.9446 |
| Listeria_monocytogenes_1639_v21                          | Listeria_monocytogenes_1639_v169 | 0.935  |
| Listeria_monocytogenes_1639_v20                          | Listeria_monocytogenes_1639_v169 | 0.9413 |
| Listeria_monocytogenes_1639_v1                           | Listeria_monocytogenes_1639_v169 | 0.9424 |
| Listeria_monocytogenes_1639_v19                          | Listeria_monocytogenes_1639_v169 | 0.9409 |
| Listeria_monocytogenes_1639_v198                         | Listeria_monocytogenes_1639_v169 | 0.9125 |
| Listeria_monocytogenes_1639_v197                         | Listeria_monocytogenes_1639_v169 | 0.9427 |
| Listeria_monocytogenes_1639_v196                         | Listeria_monocytogenes_1639_v169 | 0.9565 |
| Listeria_monocytogenes_1639_v195                         | Listeria_monocytogenes_1639_v169 | 0.9446 |
| Listeria_monocytogenes_1639_v194                         | Listeria_monocytogenes_1639_v169 | 0.9424 |
| Listeria_monocytogenes_1639_v193                         | Listeria_monocytogenes_1639_v169 | 0.9428 |
| Listeria_monocytogenes_1639_v192                         | Listeria_monocytogenes_1639_v169 | 0.9035 |
| Listeria_monocytogenes_1639_v191                         | Listeria_monocytogenes_1639_v169 | 0.9748 |
| Listeria_monocytogenes_1639_v190                         | Listeria_monocytogenes_1639_v169 | 0.9709 |
| Listeria_monocytogenes_1639_v18                          | Listeria_monocytogenes_1639_v169 | 0.9202 |
| Listeria_monocytogenes_1639_v189                         | Listeria_monocytogenes_1639_v169 | 0.9702 |
| Listeria_monocytogenes_1639_v188                         | Listeria_monocytogenes_1639_v169 | 0.9678 |
| Listeria_monocytogenes_1639_v187                         | Listeria_monocytogenes_1639_v169 | 0.9709 |
| Listeria_monocytogenes_1639_v186                         | Listeria_monocytogenes_1639_v169 | 0.9713 |
| Listeria_monocytogenes_1639_v185                         | Listeria_monocytogenes_1639_v169 | 0.9713 |
| Listeria_monocytogenes_1639_v184                         | Listeria_monocytogenes_1639_v169 | 0.9705 |
| Listeria_monocytogenes_1639_v183                         | Listeria_monocytogenes_1639_v169 | 0.9671 |
| Listeria_monocytogenes_1639_v182                         | Listeria_monocytogenes_1639_v169 | 0.9693 |
| Listeria_monocytogenes_1639_v181                         | Listeria_monocytogenes_1639_v169 | 0.9256 |
| Listeria_monocytogenes_1639_v180                         | Listeria_monocytogenes_1639_v169 | 0.9256 |
| Listeria_monocytogenes_1639_v17                          | Listeria_monocytogenes_1639_v169 | 0.9206 |
| Listeria_monocytogenes_1639_v179                         | Listeria_monocytogenes_1639_v169 | 0.9563 |
| Listeria_monocytogenes_1639_v178                         | Listeria_monocytogenes_1639_v169 | 0.9706 |
| Listeria_monocytogenes_1639_v177                         | Listeria_monocytogenes_1639_v169 | 0.9462 |
| Listeria_monocytogenes_1639_v176                         | Listeria_monocytogenes_1639_v169 | 0.9382 |
| Listeria_monocytogenes_1639_v175                         | Listeria_monocytogenes_1639_v169 | 0.9739 |
| Listeria_monocytogenes_1639_v174                         | Listeria_monocytogenes_1639_v169 | 0.9691 |
| Listeria_monocytogenes_1639_v173                         | Listeria_monocytogenes_1639_v169 | 0.9547 |
| Listeria_monocytogenes_1639_v172                         | Listeria_monocytogenes_1639_v169 | 0.9376 |
| Listeria_monocytogenes_1639_v171                         | Listeria_monocytogenes_1639_v169 | 0.9584 |
| Listeria_monocytogenes_1639_v170                         | Listeria_monocytogenes_1639_v169 | 0.9669 |
| Listeria_monocytogenes_1639_v16                          | Listeria_monocytogenes_1639_v169 | 0.9427 |
| Listeria_monocytogenes_1639_v169                         | Listeria_monocytogenes_1639_v169 | 0.0653 |
| Listeria_welshimeri_1643                                 | Listeria_monocytogenes_1639_v16  | 0.8531 |
| Listeria_welshimeri_serovar_6b_str_SLCC5334_386043       | Listeria_monocytogenes_1639_v16  | 0.8525 |
| Listeria_seeligeri_serovar_1_2b_str_SLCC3954_683837      | Listeria_monocytogenes_1639_v16  | 0.8583 |
| Listeria_seeligeri_FSL_S4-171_702452                     | Listeria_monocytogenes_1639_v16  | 0.7997 |
| Listeria_seeligeri_FSL_N1-067_702453                     | Listeria_monocytogenes_1639_v16  | 0.8273 |
| Listeria_seeligeri_1640_v1                               | Listeria_monocytogenes_1639_v16  | 0.8559 |
| Listeria_seeligeri_1640                                  | Listeria_monocytogenes_1639_v16  | 0.8534 |
| Listeria_monocytogenes_WSLC1042_1457188                  | Listeria_monocytogenes_1639_v16  | 0.9033 |
| Listeria_monocytogenes_WSLC1001_1457187                  | Listeria_monocytogenes_1639_v16  | 0.9385 |
| Listeria_monocytogenes_SLCC7179_879090                   | Listeria_monocytogenes_1639_v16  | 0.9342 |
| Listeria_monocytogenes_SLCC5850_882096                   | Listeria_monocytogenes_1639_v16  | 0.9386 |
| Listeria_monocytogenes_SLCC2755_932919                   | Listeria_monocytogenes_1639_v16  | 0.9131 |
| Listeria_monocytogenes_SLCC2540_879089                   | Listeria_monocytogenes_1639_v16  | 0.9216 |
| Listeria_monocytogenes_SLCC2479_882020                   | Listeria_monocytogenes_1639_v16  | 0.9367 |
| Listeria_monocytogenes_SLCC2378_879088                   | Listeria_monocytogenes_1639_v16  | 0.9046 |
| Listeria_monocytogenes_SLCC2376_882097                   | Listeria_monocytogenes_1639_v16  | 0.9075 |
| Listeria_monocytogenes_SLCC2372_932920                   | Listeria_monocytogenes_1639_v16  | 0.9375 |
| Listeria_monocytogenes_serotype_4b_str_LL195_1230340     | Listeria_monocytogenes_1639_v16  | 0.9092 |
| Listeria_monocytogenes_serotype_4b_str_LIS0087_1134669   | Listeria_monocytogenes_1639_v16  | 0.9202 |
| Listeria_monocytogenes_serotype_4b_str_F2365_265669      | Listeria_monocytogenes_1639_v16  | 0.9092 |
| Listeria_monocytogenes_serotype_4b_str_CLIP_80459_568819 | Listeria_monocytogenes_1639_v16  | 0.9158 |
| Listeria_monocytogenes_serotype_4b_str_81-0861_1196161   | Listeria_monocytogenes_1639_v16  | 0.9009 |
| Listeria_monocytogenes_serotype_4b_str_81-0592_1196160   | Listeria_monocytogenes_1639_v16  | 0.902  |
| Listeria_monocytogenes_serotype_4b_str_81-0558_1196159   | Listeria_monocytogenes_1639_v16  | 0.9026 |
| Listeria_monocytogenes_serotype_4b_str_10-0809_1196162   | Listeria_monocytogenes_1639_v16  | 0.902  |
| Listeria_monocytogenes_serotype_4b_str_02-6680_1196175   | Listeria_monocytogenes_1639_v16  | 0.9127 |
| Listeria_monocytogenes_serotype_4b_str_02-6679_1196174   | Listeria_monocytogenes_1639_v16  | 0.9127 |
| Listeria_monocytogenes_serotype_4b_str_02-1792_1196173   | Listeria_monocytogenes_1639_v16  | 0.9038 |
| Listeria_monocytogenes_serotype_4b_str_02-1289_1196172   | Listeria_monocytogenes_1639_v16  | 0.9038 |
| Listeria_monocytogenes_serotype_4b_str_02-1103_1196171   | Listeria_monocytogenes_1639_v16  | 0.9038 |
| Listeria_monocytogenes_serotype_3c_str_10-5027_1196195   | Listeria_monocytogenes_1639_v16  | 0.9396 |
| Listeria_monocytogenes_serotype_1_2c_str_10-5026_1196194 | Listeria_monocytogenes_1639_v16  | 0.9403 |
| Listeria_monocytogenes_serotype_1_2c_str_10-5025_1196193 | Listeria_monocytogenes_1639_v16  | 0.9403 |
| Listeria_monocytogenes_serotype_1_2b_str_10-0811_1196164 | Listeria_monocytogenes_1639_v16  | 0.9301 |
| Listeria_monocytogenes_serotype_1_2b_str_10-0810_1196163 | Listeria_monocytogenes_1639_v16  | 0.9301 |
| Listeria_monocytogenes_serotype_1_2a_str_99-6370_1196179 | Listeria_monocytogenes_1639_v16  | 0.9881 |
| Listeria_monocytogenes_serotype_1_2a_str_98-2035_1196178 | Listeria_monocytogenes_1639_v16  | 0.9881 |
| Listeria_monocytogenes_serotype_1_2a_str_95-0093_1196177 | Listeria_monocytogenes_1639_v16  | 0.9834 |
| Listeria_monocytogenes_serotype_1_2a_str_88-0478_1196176 | Listeria_monocytogenes_1639_v16  | 0.9794 |
| Listeria_monocytogenes_serotype_1_2a_str_10-5024_1196192 | Listeria_monocytogenes_1639_v16  | 0.9852 |
| Listeria_monocytogenes_serotype_1_2a_str_10-4758_1196168 | Listeria_monocytogenes_1639_v16  | 0.9364 |
| Listeria_monocytogenes_serotype_1_2a_str_10-4754_1196167 | Listeria_monocytogenes_1639_v16  | 0.9364 |
| Listeria_monocytogenes_serotype_1_2a_str_10-1321_1196191 | Listeria_monocytogenes_1639_v16  | 0.9852 |
| Listeria_monocytogenes_serotype_1_2a_str_10-1047_1196190 | Listeria_monocytogenes_1639_v16  | 0.9819 |
| Listeria_monocytogenes_serotype_1_2a_str_10-1046_1196189 | Listeria_monocytogenes_1639_v16  | 0.9819 |
| Listeria_monocytogenes_serotype_1_2a_str_10-0934_1196170 | Listeria_monocytogenes_1639_v16  | 0.9349 |
| Listeria_monocytogenes_serotype_1_2a_str_10-0933_1196169 | Listeria_monocytogenes_1639_v16  | 0.9349 |

|                                                          |                                 |        |
|----------------------------------------------------------|---------------------------------|--------|
| Listeria_monocytogenes_serotype_1_2a_str_10-0815_1196188 | Listeria_monocytogenes_1639_v16 | 0.9899 |
| Listeria_monocytogenes_serotype_1_2a_str_10-0814_1196187 | Listeria_monocytogenes_1639_v16 | 0.9852 |
| Listeria_monocytogenes_serotype_1_2a_str_10-0813_1196166 | Listeria_monocytogenes_1639_v16 | 0.9401 |
| Listeria_monocytogenes_serotype_1_2a_str_10-0812_1196165 | Listeria_monocytogenes_1639_v16 | 0.9401 |
| Listeria_monocytogenes_serotype_1_2a_str_08-7669_1196186 | Listeria_monocytogenes_1639_v16 | 0.9748 |
| Listeria_monocytogenes_serotype_1_2a_str_08-7374_1196185 | Listeria_monocytogenes_1639_v16 | 0.9852 |
| Listeria_monocytogenes_serotype_1_2a_str_08-6997_1196184 | Listeria_monocytogenes_1639_v16 | 0.9899 |
| Listeria_monocytogenes_serotype_1_2a_str_08-6569_1196183 | Listeria_monocytogenes_1639_v16 | 0.9899 |
| Listeria_monocytogenes_serotype_1_2a_str_08-6056_1196182 | Listeria_monocytogenes_1639_v16 | 0.9899 |
| Listeria_monocytogenes_serotype_1_2a_str_04-5457_1196181 | Listeria_monocytogenes_1639_v16 | 0.9852 |
| Listeria_monocytogenes_serotype_1_2a_str_02-5993_1196180 | Listeria_monocytogenes_1639_v16 | 0.9848 |
| Listeria_monocytogenes_R479a_1437838                     | Listeria_monocytogenes_1639_v16 | 0.9707 |
| Listeria_monocytogenes_N53-1_1234142                     | Listeria_monocytogenes_1639_v16 | 0.8807 |
| Listeria_monocytogenes_M7_1030009                        | Listeria_monocytogenes_1639_v16 | 0.8878 |
| Listeria_monocytogenes_LO28_393132                       | Listeria_monocytogenes_1639_v16 | 0.9299 |
| Listeria_monocytogenes_L99_563174                        | Listeria_monocytogenes_1639_v16 | 0.8884 |
| Listeria_monocytogenes_L312_882094                       | Listeria_monocytogenes_1639_v16 | 0.9158 |
| Listeria_monocytogenes_J1816_930781                      | Listeria_monocytogenes_1639_v16 | 0.9067 |
| Listeria_monocytogenes_J1-220_930782                     | Listeria_monocytogenes_1639_v16 | 0.9071 |
| Listeria_monocytogenes_J0161_393130                      | Listeria_monocytogenes_1639_v16 | 0.9291 |
| Listeria_monocytogenes_HCC23_552536                      | Listeria_monocytogenes_1639_v16 | 0.8877 |
| Listeria_monocytogenes_FSL_R2-561_393126                 | Listeria_monocytogenes_1639_v16 | 0.9375 |
| Listeria_monocytogenes_FSL_J1-208_393119                 | Listeria_monocytogenes_1639_v16 | 0.8767 |
| Listeria_monocytogenes_FSL_J1-175_393118                 | Listeria_monocytogenes_1639_v16 | 0.9191 |
| Listeria_monocytogenes_Finland_1998_393127               | Listeria_monocytogenes_1639_v16 | 0.9352 |
| Listeria_monocytogenes_EGD-e_169963_v1                   | Listeria_monocytogenes_1639_v16 | 0.9292 |
| Listeria_monocytogenes_EGD-e_169963                      | Listeria_monocytogenes_1639_v16 | 0.9296 |
| Listeria_monocytogenes_EGD_1334565                       | Listeria_monocytogenes_1639_v16 | 0.9393 |
| Listeria_monocytogenes_CFSAN002349_1299895               | Listeria_monocytogenes_1639_v16 | 0.9128 |
| Listeria_monocytogenes_ATCC_19117_882095_v1              | Listeria_monocytogenes_1639_v16 | 0.9081 |
| Listeria_monocytogenes_ATCC_19117_882095                 | Listeria_monocytogenes_1639_v16 | 0.9081 |
| Listeria_monocytogenes_6179_1288295                      | Listeria_monocytogenes_1639_v16 | 0.9416 |
| Listeria_monocytogenes_1639_v9                           | Listeria_monocytogenes_1639_v16 | 0.9099 |
| Listeria_monocytogenes_1639_v99                          | Listeria_monocytogenes_1639_v16 | 0.9147 |
| Listeria_monocytogenes_1639_v98                          | Listeria_monocytogenes_1639_v16 | 0.936  |
| Listeria_monocytogenes_1639_v97                          | Listeria_monocytogenes_1639_v16 | 0.9111 |
| Listeria_monocytogenes_1639_v96                          | Listeria_monocytogenes_1639_v16 | 0.9133 |
| Listeria_monocytogenes_1639_v95                          | Listeria_monocytogenes_1639_v16 | 0.9133 |
| Listeria_monocytogenes_1639_v94                          | Listeria_monocytogenes_1639_v16 | 0.9137 |
| Listeria_monocytogenes_1639_v93                          | Listeria_monocytogenes_1639_v16 | 0.9356 |
| Listeria_monocytogenes_1639_v92                          | Listeria_monocytogenes_1639_v16 | 0.9155 |
| Listeria_monocytogenes_1639_v91                          | Listeria_monocytogenes_1639_v16 | 0.9084 |
| Listeria_monocytogenes_1639_v90                          | Listeria_monocytogenes_1639_v16 | 0.936  |
| Listeria_monocytogenes_1639_v8                           | Listeria_monocytogenes_1639_v16 | 0.9621 |
| Listeria_monocytogenes_1639_v89                          | Listeria_monocytogenes_1639_v16 | 0.9144 |
| Listeria_monocytogenes_1639_v88                          | Listeria_monocytogenes_1639_v16 | 0.9424 |
| Listeria_monocytogenes_1639_v87                          | Listeria_monocytogenes_1639_v16 | 0.935  |
| Listeria_monocytogenes_1639_v86                          | Listeria_monocytogenes_1639_v16 | 0.9343 |
| Listeria_monocytogenes_1639_v85                          | Listeria_monocytogenes_1639_v16 | 0.9011 |
| Listeria_monocytogenes_1639_v84                          | Listeria_monocytogenes_1639_v16 | 0.943  |
| Listeria_monocytogenes_1639_v83                          | Listeria_monocytogenes_1639_v16 | 0.9033 |
| Listeria_monocytogenes_1639_v82                          | Listeria_monocytogenes_1639_v16 | 0.903  |
| Listeria_monocytogenes_1639_v81                          | Listeria_monocytogenes_1639_v16 | 0.9464 |
| Listeria_monocytogenes_1639_v80                          | Listeria_monocytogenes_1639_v16 | 0.9218 |
| Listeria_monocytogenes_1639_v7                           | Listeria_monocytogenes_1639_v16 | 0.9621 |
| Listeria_monocytogenes_1639_v79                          | Listeria_monocytogenes_1639_v16 | 0.9432 |
| Listeria_monocytogenes_1639_v78                          | Listeria_monocytogenes_1639_v16 | 0.9471 |
| Listeria_monocytogenes_1639_v77                          | Listeria_monocytogenes_1639_v16 | 0.9338 |
| Listeria_monocytogenes_1639_v76                          | Listeria_monocytogenes_1639_v16 | 0.9396 |
| Listeria_monocytogenes_1639_v75                          | Listeria_monocytogenes_1639_v16 | 0.8884 |
| Listeria_monocytogenes_1639_v74                          | Listeria_monocytogenes_1639_v16 | 0.9295 |
| Listeria_monocytogenes_1639_v73                          | Listeria_monocytogenes_1639_v16 | 0.9368 |
| Listeria_monocytogenes_1639_v72                          | Listeria_monocytogenes_1639_v16 | 0.9039 |
| Listeria_monocytogenes_1639_v71                          | Listeria_monocytogenes_1639_v16 | 0.9304 |
| Listeria_monocytogenes_1639_v70                          | Listeria_monocytogenes_1639_v16 | 0.9391 |
| Listeria_monocytogenes_1639_v6                           | Listeria_monocytogenes_1639_v16 | 0.9614 |
| Listeria_monocytogenes_1639_v69                          | Listeria_monocytogenes_1639_v16 | 0.9023 |
| Listeria_monocytogenes_1639_v68                          | Listeria_monocytogenes_1639_v16 | 0.9226 |
| Listeria_monocytogenes_1639_v67                          | Listeria_monocytogenes_1639_v16 | 0.9219 |
| Listeria_monocytogenes_1639_v66                          | Listeria_monocytogenes_1639_v16 | 0.9358 |
| Listeria_monocytogenes_1639_v65                          | Listeria_monocytogenes_1639_v16 | 0.9619 |
| Listeria_monocytogenes_1639_v64                          | Listeria_monocytogenes_1639_v16 | 0.9406 |
| Listeria_monocytogenes_1639_v63                          | Listeria_monocytogenes_1639_v16 | 0.93   |
| Listeria_monocytogenes_1639_v62                          | Listeria_monocytogenes_1639_v16 | 0.9502 |
| Listeria_monocytogenes_1639_v61                          | Listeria_monocytogenes_1639_v16 | 0.9626 |
| Listeria_monocytogenes_1639_v60                          | Listeria_monocytogenes_1639_v16 | 0.9299 |
| Listeria_monocytogenes_1639_v5                           | Listeria_monocytogenes_1639_v16 | 0.8998 |
| Listeria_monocytogenes_1639_v59                          | Listeria_monocytogenes_1639_v16 | 0.9087 |
| Listeria_monocytogenes_1639_v58                          | Listeria_monocytogenes_1639_v16 | 0.904  |
| Listeria_monocytogenes_1639_v57                          | Listeria_monocytogenes_1639_v16 | 0.9046 |
| Listeria_monocytogenes_1639_v56                          | Listeria_monocytogenes_1639_v16 | 0.9098 |
| Listeria_monocytogenes_1639_v55                          | Listeria_monocytogenes_1639_v16 | 0.9089 |
| Listeria_monocytogenes_1639_v54                          | Listeria_monocytogenes_1639_v16 | 0.9037 |
| Listeria_monocytogenes_1639_v53                          | Listeria_monocytogenes_1639_v16 | 0.9197 |
| Listeria_monocytogenes_1639_v52                          | Listeria_monocytogenes_1639_v16 | 0.9101 |
| Listeria_monocytogenes_1639_v51                          | Listeria_monocytogenes_1639_v16 | 0.9063 |
| Listeria_monocytogenes_1639_v50                          | Listeria_monocytogenes_1639_v16 | 0.9841 |
| Listeria_monocytogenes_1639_v4                           | Listeria_monocytogenes_1639_v16 | 0.9051 |
| Listeria_monocytogenes_1639_v49                          | Listeria_monocytogenes_1639_v16 | 0.8998 |
| Listeria_monocytogenes_1639_v48                          | Listeria_monocytogenes_1639_v16 | 0.9447 |
| Listeria_monocytogenes_1639_v47                          | Listeria_monocytogenes_1639_v16 | 0.9805 |

|                                                          |                                  |        |
|----------------------------------------------------------|----------------------------------|--------|
| Listeria_monocytogenes_1639_v46                          | Listeria_monocytogenes_1639_v16  | 0.9263 |
| Listeria_monocytogenes_1639_v45                          | Listeria_monocytogenes_1639_v16  | 0.9953 |
| Listeria_monocytogenes_1639_v44                          | Listeria_monocytogenes_1639_v16  | 0.9852 |
| Listeria_monocytogenes_1639_v43                          | Listeria_monocytogenes_1639_v16  | 0.9852 |
| Listeria_monocytogenes_1639_v42                          | Listeria_monocytogenes_1639_v16  | 0.9263 |
| Listeria_monocytogenes_1639_v41                          | Listeria_monocytogenes_1639_v16  | 0.93   |
| Listeria_monocytogenes_1639_v40                          | Listeria_monocytogenes_1639_v16  | 0.94   |
| Listeria_monocytogenes_1639_v3                           | Listeria_monocytogenes_1639_v16  | 0.9058 |
| Listeria_monocytogenes_1639_v39                          | Listeria_monocytogenes_1639_v16  | 0.9209 |
| Listeria_monocytogenes_1639_v38                          | Listeria_monocytogenes_1639_v16  | 0.9246 |
| Listeria_monocytogenes_1639_v37                          | Listeria_monocytogenes_1639_v16  | 0.9196 |
| Listeria_monocytogenes_1639_v36                          | Listeria_monocytogenes_1639_v16  | 0.937  |
| Listeria_monocytogenes_1639_v35                          | Listeria_monocytogenes_1639_v16  | 0.9363 |
| Listeria_monocytogenes_1639_v34                          | Listeria_monocytogenes_1639_v16  | 0.9341 |
| Listeria_monocytogenes_1639_v33                          | Listeria_monocytogenes_1639_v16  | 0.9301 |
| Listeria_monocytogenes_1639_v32                          | Listeria_monocytogenes_1639_v16  | 0.9276 |
| Listeria_monocytogenes_1639_v31                          | Listeria_monocytogenes_1639_v16  | 0.9341 |
| Listeria_monocytogenes_1639_v30                          | Listeria_monocytogenes_1639_v16  | 0.9118 |
| Listeria_monocytogenes_1639_v2                           | Listeria_monocytogenes_1639_v16  | 0.898  |
| Listeria_monocytogenes_1639_v29                          | Listeria_monocytogenes_1639_v16  | 0.9355 |
| Listeria_monocytogenes_1639_v28                          | Listeria_monocytogenes_1639_v16  | 0.9327 |
| Listeria_monocytogenes_1639_v27                          | Listeria_monocytogenes_1639_v16  | 0.9251 |
| Listeria_monocytogenes_1639_v26                          | Listeria_monocytogenes_1639_v16  | 0.9255 |
| Listeria_monocytogenes_1639_v25                          | Listeria_monocytogenes_1639_v16  | 0.9255 |
| Listeria_monocytogenes_1639_v24                          | Listeria_monocytogenes_1639_v16  | 0.9056 |
| Listeria_monocytogenes_1639_v23                          | Listeria_monocytogenes_1639_v16  | 0.9056 |
| Listeria_monocytogenes_1639_v22                          | Listeria_monocytogenes_1639_v16  | 0.9274 |
| Listeria_monocytogenes_1639_v21                          | Listeria_monocytogenes_1639_v16  | 0.9049 |
| Listeria_monocytogenes_1639_v20                          | Listeria_monocytogenes_1639_v16  | 0.9312 |
| Listeria_monocytogenes_1639_v1                           | Listeria_monocytogenes_1639_v16  | 0.9442 |
| Listeria_monocytogenes_1639_v19                          | Listeria_monocytogenes_1639_v16  | 0.9305 |
| Listeria_monocytogenes_1639_v198                         | Listeria_monocytogenes_1639_v16  | 0.8821 |
| Listeria_monocytogenes_1639_v197                         | Listeria_monocytogenes_1639_v16  | 0.9169 |
| Listeria_monocytogenes_1639_v196                         | Listeria_monocytogenes_1639_v16  | 0.9226 |
| Listeria_monocytogenes_1639_v195                         | Listeria_monocytogenes_1639_v16  | 0.9096 |
| Listeria_monocytogenes_1639_v194                         | Listeria_monocytogenes_1639_v16  | 0.9079 |
| Listeria_monocytogenes_1639_v193                         | Listeria_monocytogenes_1639_v16  | 0.9082 |
| Listeria_monocytogenes_1639_v192                         | Listeria_monocytogenes_1639_v16  | 0.8736 |
| Listeria_monocytogenes_1639_v191                         | Listeria_monocytogenes_1639_v16  | 0.9325 |
| Listeria_monocytogenes_1639_v190                         | Listeria_monocytogenes_1639_v16  | 0.9355 |
| Listeria_monocytogenes_1639_v18                          | Listeria_monocytogenes_1639_v16  | 0.9005 |
| Listeria_monocytogenes_1639_v189                         | Listeria_monocytogenes_1639_v16  | 0.9348 |
| Listeria_monocytogenes_1639_v188                         | Listeria_monocytogenes_1639_v16  | 0.9305 |
| Listeria_monocytogenes_1639_v187                         | Listeria_monocytogenes_1639_v16  | 0.9351 |
| Listeria_monocytogenes_1639_v186                         | Listeria_monocytogenes_1639_v16  | 0.9359 |
| Listeria_monocytogenes_1639_v185                         | Listeria_monocytogenes_1639_v16  | 0.9355 |
| Listeria_monocytogenes_1639_v184                         | Listeria_monocytogenes_1639_v16  | 0.9351 |
| Listeria_monocytogenes_1639_v183                         | Listeria_monocytogenes_1639_v16  | 0.9277 |
| Listeria_monocytogenes_1639_v182                         | Listeria_monocytogenes_1639_v16  | 0.9298 |
| Listeria_monocytogenes_1639_v181                         | Listeria_monocytogenes_1639_v16  | 0.8882 |
| Listeria_monocytogenes_1639_v180                         | Listeria_monocytogenes_1639_v16  | 0.8882 |
| Listeria_monocytogenes_1639_v17                          | Listeria_monocytogenes_1639_v16  | 0.9005 |
| Listeria_monocytogenes_1639_v179                         | Listeria_monocytogenes_1639_v16  | 0.9321 |
| Listeria_monocytogenes_1639_v178                         | Listeria_monocytogenes_1639_v16  | 0.9337 |
| Listeria_monocytogenes_1639_v177                         | Listeria_monocytogenes_1639_v16  | 0.9124 |
| Listeria_monocytogenes_1639_v176                         | Listeria_monocytogenes_1639_v16  | 0.9046 |
| Listeria_monocytogenes_1639_v175                         | Listeria_monocytogenes_1639_v16  | 0.9435 |
| Listeria_monocytogenes_1639_v174                         | Listeria_monocytogenes_1639_v16  | 0.9349 |
| Listeria_monocytogenes_1639_v173                         | Listeria_monocytogenes_1639_v16  | 0.9185 |
| Listeria_monocytogenes_1639_v172                         | Listeria_monocytogenes_1639_v16  | 0.903  |
| Listeria_monocytogenes_1639_v171                         | Listeria_monocytogenes_1639_v16  | 0.9417 |
| Listeria_monocytogenes_1639_v170                         | Listeria_monocytogenes_1639_v16  | 0.9404 |
| Listeria_monocytogenes_1639_v16                          | Listeria_monocytogenes_1639_v16  | 0.0734 |
| Listeria_welshimeri_1643                                 | Listeria_monocytogenes_1639_v170 | 0.8784 |
| Listeria_welshimeri_serovar_6b_str_SLCC5334_386043       | Listeria_monocytogenes_1639_v170 | 0.8781 |
| Listeria_seeligeri_serovar_1_2b_str_SLCC3954_683837      | Listeria_monocytogenes_1639_v170 | 0.8907 |
| Listeria_seeligeri_FSL_S4-171_702452                     | Listeria_monocytogenes_1639_v170 | 0.8215 |
| Listeria_seeligeri_FSL_N1-067_702453                     | Listeria_monocytogenes_1639_v170 | 0.8317 |
| Listeria_seeligeri_1640_v1                               | Listeria_monocytogenes_1639_v170 | 0.8875 |
| Listeria_seeligeri_1640                                  | Listeria_monocytogenes_1639_v170 | 0.8784 |
| Listeria_monocytogenes_WSLC1042_1457188                  | Listeria_monocytogenes_1639_v170 | 0.9346 |
| Listeria_monocytogenes_WSLC1001_1457187                  | Listeria_monocytogenes_1639_v170 | 0.976  |
| Listeria_monocytogenes_SLCC7179_879090                   | Listeria_monocytogenes_1639_v170 | 0.9642 |
| Listeria_monocytogenes_SLCC5850_882096                   | Listeria_monocytogenes_1639_v170 | 0.9797 |
| Listeria_monocytogenes_SLCC2755_932919                   | Listeria_monocytogenes_1639_v170 | 0.9393 |
| Listeria_monocytogenes_SLCC2540_879089                   | Listeria_monocytogenes_1639_v170 | 0.9405 |
| Listeria_monocytogenes_SLCC2479_882020                   | Listeria_monocytogenes_1639_v170 | 0.9512 |
| Listeria_monocytogenes_SLCC2378_879088                   | Listeria_monocytogenes_1639_v170 | 0.9357 |
| Listeria_monocytogenes_SLCC2376_882097                   | Listeria_monocytogenes_1639_v170 | 0.9489 |
| Listeria_monocytogenes_SLCC2372_932920                   | Listeria_monocytogenes_1639_v170 | 0.9437 |
| Listeria_monocytogenes_serotype_4b_str_LL195_1230340     | Listeria_monocytogenes_1639_v170 | 0.9418 |
| Listeria_monocytogenes_serotype_4b_str_LIS0087_1134669   | Listeria_monocytogenes_1639_v170 | 0.9579 |
| Listeria_monocytogenes_serotype_4b_str_F2365_265669      | Listeria_monocytogenes_1639_v170 | 0.9418 |
| Listeria_monocytogenes_serotype_4b_str_CLIP_80459_568819 | Listeria_monocytogenes_1639_v170 | 0.9487 |
| Listeria_monocytogenes_serotype_4b_str_81-0861_1196161   | Listeria_monocytogenes_1639_v170 | 0.9265 |
| Listeria_monocytogenes_serotype_4b_str_81-0592_1196160   | Listeria_monocytogenes_1639_v170 | 0.9276 |
| Listeria_monocytogenes_serotype_4b_str_81-0558_1196159   | Listeria_monocytogenes_1639_v170 | 0.9279 |
| Listeria_monocytogenes_serotype_4b_str_10-0809_1196162   | Listeria_monocytogenes_1639_v170 | 0.9276 |
| Listeria_monocytogenes_serotype_4b_str_02-6680_1196175   | Listeria_monocytogenes_1639_v170 | 0.9472 |
| Listeria_monocytogenes_serotype_4b_str_02-6679_1196174   | Listeria_monocytogenes_1639_v170 | 0.9472 |
| Listeria_monocytogenes_serotype_4b_str_02-1792_1196173   | Listeria_monocytogenes_1639_v170 | 0.928  |

|                                                          |                                  |        |
|----------------------------------------------------------|----------------------------------|--------|
| Listeria_monocytogenes_serotype_4b_str_02-1289_1196172   | Listeria_monocytogenes_1639_v170 | 0.928  |
| Listeria_monocytogenes_serotype_4b_str_02-1103_1196171   | Listeria_monocytogenes_1639_v170 | 0.928  |
| Listeria_monocytogenes_serotype_3c_str_10-5027_1196195   | Listeria_monocytogenes_1639_v170 | 0.9508 |
| Listeria_monocytogenes_serotype_1_2c_str_10-5026_1196194 | Listeria_monocytogenes_1639_v170 | 0.9519 |
| Listeria_monocytogenes_serotype_1_2c_str_10-5025_1196193 | Listeria_monocytogenes_1639_v170 | 0.9519 |
| Listeria_monocytogenes_serotype_1_2b_str_10-0811_1196164 | Listeria_monocytogenes_1639_v170 | 0.9412 |
| Listeria_monocytogenes_serotype_1_2b_str_10-0810_1196163 | Listeria_monocytogenes_1639_v170 | 0.9412 |
| Listeria_monocytogenes_serotype_1_2a_str_99-6370_1196179 | Listeria_monocytogenes_1639_v170 | 0.95   |
| Listeria_monocytogenes_serotype_1_2a_str_98-2035_1196178 | Listeria_monocytogenes_1639_v170 | 0.95   |
| Listeria_monocytogenes_serotype_1_2a_str_95-0093_1196177 | Listeria_monocytogenes_1639_v170 | 0.947  |
| Listeria_monocytogenes_serotype_1_2a_str_88-0478_1196176 | Listeria_monocytogenes_1639_v170 | 0.9462 |
| Listeria_monocytogenes_serotype_1_2a_str_10-5024_1196192 | Listeria_monocytogenes_1639_v170 | 0.947  |
| Listeria_monocytogenes_serotype_1_2a_str_10-4758_1196168 | Listeria_monocytogenes_1639_v170 | 0.9591 |
| Listeria_monocytogenes_serotype_1_2a_str_10-4754_1196167 | Listeria_monocytogenes_1639_v170 | 0.9595 |
| Listeria_monocytogenes_serotype_1_2a_str_10-1321_1196191 | Listeria_monocytogenes_1639_v170 | 0.947  |
| Listeria_monocytogenes_serotype_1_2a_str_10-1047_1196190 | Listeria_monocytogenes_1639_v170 | 0.9473 |
| Listeria_monocytogenes_serotype_1_2a_str_10-1046_1196189 | Listeria_monocytogenes_1639_v170 | 0.9473 |
| Listeria_monocytogenes_serotype_1_2a_str_10-0934_1196170 | Listeria_monocytogenes_1639_v170 | 0.9795 |
| Listeria_monocytogenes_serotype_1_2a_str_10-0933_1196169 | Listeria_monocytogenes_1639_v170 | 0.9795 |
| Listeria_monocytogenes_serotype_1_2a_str_10-0815_1196188 | Listeria_monocytogenes_1639_v170 | 0.9503 |
| Listeria_monocytogenes_serotype_1_2a_str_10-0814_1196187 | Listeria_monocytogenes_1639_v170 | 0.947  |
| Listeria_monocytogenes_serotype_1_2a_str_10-0813_1196166 | Listeria_monocytogenes_1639_v170 | 0.9734 |
| Listeria_monocytogenes_serotype_1_2a_str_10-0812_1196165 | Listeria_monocytogenes_1639_v170 | 0.9734 |
| Listeria_monocytogenes_serotype_1_2a_str_08-7669_1196186 | Listeria_monocytogenes_1639_v170 | 0.9556 |
| Listeria_monocytogenes_serotype_1_2a_str_08-7374_1196185 | Listeria_monocytogenes_1639_v170 | 0.947  |
| Listeria_monocytogenes_serotype_1_2a_str_08-6997_1196184 | Listeria_monocytogenes_1639_v170 | 0.9503 |
| Listeria_monocytogenes_serotype_1_2a_str_08-6569_1196183 | Listeria_monocytogenes_1639_v170 | 0.9503 |
| Listeria_monocytogenes_serotype_1_2a_str_08-6056_1196182 | Listeria_monocytogenes_1639_v170 | 0.9503 |
| Listeria_monocytogenes_serotype_1_2a_str_04-5457_1196181 | Listeria_monocytogenes_1639_v170 | 0.947  |
| Listeria_monocytogenes_serotype_1_2a_str_02-5993_1196180 | Listeria_monocytogenes_1639_v170 | 0.947  |
| Listeria_monocytogenes_R479a_1437838                     | Listeria_monocytogenes_1639_v170 | 0.9452 |
| Listeria_monocytogenes_N53-1_1234142                     | Listeria_monocytogenes_1639_v170 | 0.9129 |
| Listeria_monocytogenes_M7_1030009                        | Listeria_monocytogenes_1639_v170 | 0.9043 |
| Listeria_monocytogenes_LO28_393132                       | Listeria_monocytogenes_1639_v170 | 0.9498 |
| Listeria_monocytogenes_L99_563174                        | Listeria_monocytogenes_1639_v170 | 0.9047 |
| Listeria_monocytogenes_L312_882094                       | Listeria_monocytogenes_1639_v170 | 0.9487 |
| Listeria_monocytogenes_J1816_930781                      | Listeria_monocytogenes_1639_v170 | 0.929  |
| Listeria_monocytogenes_J1-220_930782                     | Listeria_monocytogenes_1639_v170 | 0.9255 |
| Listeria_monocytogenes_J0161_393130                      | Listeria_monocytogenes_1639_v170 | 0.9505 |
| Listeria_monocytogenes_HCC23_552536                      | Listeria_monocytogenes_1639_v170 | 0.9043 |
| Listeria_monocytogenes_FSL_R2-561_393126                 | Listeria_monocytogenes_1639_v170 | 0.9501 |
| Listeria_monocytogenes_FSL_J1-208_393119                 | Listeria_monocytogenes_1639_v170 | 0.9134 |
| Listeria_monocytogenes_FSL_J1-175_393118                 | Listeria_monocytogenes_1639_v170 | 0.9445 |
| Listeria_monocytogenes_Finland_1998_393127               | Listeria_monocytogenes_1639_v170 | 0.9667 |
| Listeria_monocytogenes_EGD-e_169963_v1                   | Listeria_monocytogenes_1639_v170 | 0.958  |
| Listeria_monocytogenes_EGD-e_169963                      | Listeria_monocytogenes_1639_v170 | 0.958  |
| Listeria_monocytogenes_EGD_1334565                       | Listeria_monocytogenes_1639_v170 | 0.9805 |
| Listeria_monocytogenes_CFSAN002349_1299895               | Listeria_monocytogenes_1639_v170 | 0.9473 |
| Listeria_monocytogenes_ATCC_19117_882095_v1              | Listeria_monocytogenes_1639_v170 | 0.9428 |
| Listeria_monocytogenes_ATCC_19117_882095                 | Listeria_monocytogenes_1639_v170 | 0.9424 |
| Listeria_monocytogenes_6179_1288295                      | Listeria_monocytogenes_1639_v170 | 0.9359 |
| Listeria_monocytogenes_1639_v9                           | Listeria_monocytogenes_1639_v170 | 0.9183 |
| Listeria_monocytogenes_1639_v99                          | Listeria_monocytogenes_1639_v170 | 0.9302 |
| Listeria_monocytogenes_1639_v98                          | Listeria_monocytogenes_1639_v170 | 0.9557 |
| Listeria_monocytogenes_1639_v97                          | Listeria_monocytogenes_1639_v170 | 0.9368 |
| Listeria_monocytogenes_1639_v96                          | Listeria_monocytogenes_1639_v170 | 0.9291 |
| Listeria_monocytogenes_1639_v95                          | Listeria_monocytogenes_1639_v170 | 0.9291 |
| Listeria_monocytogenes_1639_v94                          | Listeria_monocytogenes_1639_v170 | 0.9298 |
| Listeria_monocytogenes_1639_v93                          | Listeria_monocytogenes_1639_v170 | 0.9458 |
| Listeria_monocytogenes_1639_v92                          | Listeria_monocytogenes_1639_v170 | 0.9298 |
| Listeria_monocytogenes_1639_v91                          | Listeria_monocytogenes_1639_v170 | 0.9252 |
| Listeria_monocytogenes_1639_v90                          | Listeria_monocytogenes_1639_v170 | 0.9557 |
| Listeria_monocytogenes_1639_v8                           | Listeria_monocytogenes_1639_v170 | 0.9347 |
| Listeria_monocytogenes_1639_v89                          | Listeria_monocytogenes_1639_v170 | 0.9396 |
| Listeria_monocytogenes_1639_v88                          | Listeria_monocytogenes_1639_v170 | 0.9606 |
| Listeria_monocytogenes_1639_v87                          | Listeria_monocytogenes_1639_v170 | 0.9679 |
| Listeria_monocytogenes_1639_v86                          | Listeria_monocytogenes_1639_v170 | 0.9679 |
| Listeria_monocytogenes_1639_v85                          | Listeria_monocytogenes_1639_v170 | 0.9258 |
| Listeria_monocytogenes_1639_v84                          | Listeria_monocytogenes_1639_v170 | 0.9536 |
| Listeria_monocytogenes_1639_v83                          | Listeria_monocytogenes_1639_v170 | 0.9324 |
| Listeria_monocytogenes_1639_v82                          | Listeria_monocytogenes_1639_v170 | 0.9321 |
| Listeria_monocytogenes_1639_v81                          | Listeria_monocytogenes_1639_v170 | 0.9495 |
| Listeria_monocytogenes_1639_v80                          | Listeria_monocytogenes_1639_v170 | 0.9373 |
| Listeria_monocytogenes_1639_v7                           | Listeria_monocytogenes_1639_v170 | 0.9347 |
| Listeria_monocytogenes_1639_v79                          | Listeria_monocytogenes_1639_v170 | 0.9474 |
| Listeria_monocytogenes_1639_v78                          | Listeria_monocytogenes_1639_v170 | 0.9492 |
| Listeria_monocytogenes_1639_v77                          | Listeria_monocytogenes_1639_v170 | 0.9524 |
| Listeria_monocytogenes_1639_v76                          | Listeria_monocytogenes_1639_v170 | 0.9537 |
| Listeria_monocytogenes_1639_v75                          | Listeria_monocytogenes_1639_v170 | 0.9047 |
| Listeria_monocytogenes_1639_v74                          | Listeria_monocytogenes_1639_v170 | 0.9671 |
| Listeria_monocytogenes_1639_v73                          | Listeria_monocytogenes_1639_v170 | 0.9444 |
| Listeria_monocytogenes_1639_v72                          | Listeria_monocytogenes_1639_v170 | 0.9309 |
| Listeria_monocytogenes_1639_v71                          | Listeria_monocytogenes_1639_v170 | 0.937  |
| Listeria_monocytogenes_1639_v70                          | Listeria_monocytogenes_1639_v170 | 0.9476 |
| Listeria_monocytogenes_1639_v6                           | Listeria_monocytogenes_1639_v170 | 0.9343 |
| Listeria_monocytogenes_1639_v69                          | Listeria_monocytogenes_1639_v170 | 0.9276 |
| Listeria_monocytogenes_1639_v68                          | Listeria_monocytogenes_1639_v170 | 0.9514 |
| Listeria_monocytogenes_1639_v67                          | Listeria_monocytogenes_1639_v170 | 0.9382 |
| Listeria_monocytogenes_1639_v66                          | Listeria_monocytogenes_1639_v170 | 0.9573 |
| Listeria_monocytogenes_1639_v65                          | Listeria_monocytogenes_1639_v170 | 0.9582 |
| Listeria_monocytogenes_1639_v64                          | Listeria_monocytogenes_1639_v170 | 0.9591 |

[illegible]



|                                                          |                                  |        |
|----------------------------------------------------------|----------------------------------|--------|
| Listeria_monocytogenes_SLCC5850_882096                   | Listeria_monocytogenes_1639_v171 | 0.9715 |
| Listeria_monocytogenes_SLCC2755_932919                   | Listeria_monocytogenes_1639_v171 | 0.9477 |
| Listeria_monocytogenes_SLCC2540_879089                   | Listeria_monocytogenes_1639_v171 | 0.9328 |
| Listeria_monocytogenes_SLCC2479_882020                   | Listeria_monocytogenes_1639_v171 | 0.9437 |
| Listeria_monocytogenes_SLCC2378_879088                   | Listeria_monocytogenes_1639_v171 | 0.9279 |
| Listeria_monocytogenes_SLCC2376_882097                   | Listeria_monocytogenes_1639_v171 | 0.9405 |
| Listeria_monocytogenes_SLCC2372_932920                   | Listeria_monocytogenes_1639_v171 | 0.9516 |
| Listeria_monocytogenes_serotype_4b_str_LL195_1230340     | Listeria_monocytogenes_1639_v171 | 0.9335 |
| Listeria_monocytogenes_serotype_4b_str_LIS0087_1134669   | Listeria_monocytogenes_1639_v171 | 0.9498 |
| Listeria_monocytogenes_serotype_4b_str_F2365_265669      | Listeria_monocytogenes_1639_v171 | 0.9335 |
| Listeria_monocytogenes_serotype_4b_str_CLIP_80459_568819 | Listeria_monocytogenes_1639_v171 | 0.9403 |
| Listeria_monocytogenes_serotype_4b_str_81-0861_1196161   | Listeria_monocytogenes_1639_v171 | 0.9189 |
| Listeria_monocytogenes_serotype_4b_str_81-0592_1196160   | Listeria_monocytogenes_1639_v171 | 0.92   |
| Listeria_monocytogenes_serotype_4b_str_81-0558_1196159   | Listeria_monocytogenes_1639_v171 | 0.9203 |
| Listeria_monocytogenes_serotype_4b_str_10-0809_1196162   | Listeria_monocytogenes_1639_v171 | 0.92   |
| Listeria_monocytogenes_serotype_4b_str_02-6680_1196175   | Listeria_monocytogenes_1639_v171 | 0.9389 |
| Listeria_monocytogenes_serotype_4b_str_02-6679_1196174   | Listeria_monocytogenes_1639_v171 | 0.9389 |
| Listeria_monocytogenes_serotype_4b_str_02-1792_1196173   | Listeria_monocytogenes_1639_v171 | 0.9203 |
| Listeria_monocytogenes_serotype_4b_str_02-1289_1196172   | Listeria_monocytogenes_1639_v171 | 0.9203 |
| Listeria_monocytogenes_serotype_4b_str_02-1103_1196171   | Listeria_monocytogenes_1639_v171 | 0.9203 |
| Listeria_monocytogenes_serotype_3c_str_10-5027_1196195   | Listeria_monocytogenes_1639_v171 | 0.9433 |
| Listeria_monocytogenes_serotype_1_2c_str_10-5026_1196194 | Listeria_monocytogenes_1639_v171 | 0.9445 |
| Listeria_monocytogenes_serotype_1_2c_str_10-5025_1196193 | Listeria_monocytogenes_1639_v171 | 0.9445 |
| Listeria_monocytogenes_serotype_1_2b_str_10-0811_1196164 | Listeria_monocytogenes_1639_v171 | 0.9331 |
| Listeria_monocytogenes_serotype_1_2b_str_10-0810_1196163 | Listeria_monocytogenes_1639_v171 | 0.9331 |
| Listeria_monocytogenes_serotype_1_2a_str_99-6370_1196179 | Listeria_monocytogenes_1639_v171 | 0.943  |
| Listeria_monocytogenes_serotype_1_2a_str_98-2035_1196178 | Listeria_monocytogenes_1639_v171 | 0.943  |
| Listeria_monocytogenes_serotype_1_2a_str_95-0093_1196177 | Listeria_monocytogenes_1639_v171 | 0.9396 |
| Listeria_monocytogenes_serotype_1_2a_str_88-0478_1196176 | Listeria_monocytogenes_1639_v171 | 0.9389 |
| Listeria_monocytogenes_serotype_1_2a_str_10-5024_1196192 | Listeria_monocytogenes_1639_v171 | 0.9396 |
| Listeria_monocytogenes_serotype_1_2a_str_10-4758_1196168 | Listeria_monocytogenes_1639_v171 | 0.9508 |
| Listeria_monocytogenes_serotype_1_2a_str_10-4754_1196167 | Listeria_monocytogenes_1639_v171 | 0.9511 |
| Listeria_monocytogenes_serotype_1_2a_str_10-1321_1196191 | Listeria_monocytogenes_1639_v171 | 0.9396 |
| Listeria_monocytogenes_serotype_1_2a_str_10-1047_1196190 | Listeria_monocytogenes_1639_v171 | 0.94   |
| Listeria_monocytogenes_serotype_1_2a_str_10-1046_1196189 | Listeria_monocytogenes_1639_v171 | 0.94   |
| Listeria_monocytogenes_serotype_1_2a_str_10-0934_1196170 | Listeria_monocytogenes_1639_v171 | 0.9708 |
| Listeria_monocytogenes_serotype_1_2a_str_10-0933_1196169 | Listeria_monocytogenes_1639_v171 | 0.9708 |
| Listeria_monocytogenes_serotype_1_2a_str_10-0815_1196188 | Listeria_monocytogenes_1639_v171 | 0.9429 |
| Listeria_monocytogenes_serotype_1_2a_str_10-0814_1196187 | Listeria_monocytogenes_1639_v171 | 0.9396 |
| Listeria_monocytogenes_serotype_1_2a_str_10-0813_1196166 | Listeria_monocytogenes_1639_v171 | 0.9657 |
| Listeria_monocytogenes_serotype_1_2a_str_10-0812_1196165 | Listeria_monocytogenes_1639_v171 | 0.9657 |
| Listeria_monocytogenes_serotype_1_2a_str_08-7669_1196186 | Listeria_monocytogenes_1639_v171 | 0.948  |
| Listeria_monocytogenes_serotype_1_2a_str_08-7374_1196185 | Listeria_monocytogenes_1639_v171 | 0.9396 |
| Listeria_monocytogenes_serotype_1_2a_str_08-6997_1196184 | Listeria_monocytogenes_1639_v171 | 0.9429 |
| Listeria_monocytogenes_serotype_1_2a_str_08-6569_1196183 | Listeria_monocytogenes_1639_v171 | 0.9429 |
| Listeria_monocytogenes_serotype_1_2a_str_08-6056_1196182 | Listeria_monocytogenes_1639_v171 | 0.9429 |
| Listeria_monocytogenes_serotype_1_2a_str_04-5457_1196181 | Listeria_monocytogenes_1639_v171 | 0.9396 |
| Listeria_monocytogenes_serotype_1_2a_str_02-5993_1196180 | Listeria_monocytogenes_1639_v171 | 0.9396 |
| Listeria_monocytogenes_R479a_1437838                     | Listeria_monocytogenes_1639_v171 | 0.946  |
| Listeria_monocytogenes_N53-1_1234142                     | Listeria_monocytogenes_1639_v171 | 0.9056 |
| Listeria_monocytogenes_M7_1030009                        | Listeria_monocytogenes_1639_v171 | 0.8973 |
| Listeria_monocytogenes_LO28_393132                       | Listeria_monocytogenes_1639_v171 | 0.9423 |
| Listeria_monocytogenes_L99_563174                        | Listeria_monocytogenes_1639_v171 | 0.8977 |
| Listeria_monocytogenes_L312_882094                       | Listeria_monocytogenes_1639_v171 | 0.9403 |
| Listeria_monocytogenes_J1816_930781                      | Listeria_monocytogenes_1639_v171 | 0.921  |
| Listeria_monocytogenes_J1-220_930782                     | Listeria_monocytogenes_1639_v171 | 0.918  |
| Listeria_monocytogenes_J0161_393130                      | Listeria_monocytogenes_1639_v171 | 0.9434 |
| Listeria_monocytogenes_HCC23_552536                      | Listeria_monocytogenes_1639_v171 | 0.8973 |
| Listeria_monocytogenes_FSL_R2-561_393126                 | Listeria_monocytogenes_1639_v171 | 0.9427 |
| Listeria_monocytogenes_FSL_J1-208_393119                 | Listeria_monocytogenes_1639_v171 | 0.9066 |
| Listeria_monocytogenes_FSL_J1-175_393118                 | Listeria_monocytogenes_1639_v171 | 0.9363 |
| Listeria_monocytogenes_Finland_1998_393127               | Listeria_monocytogenes_1639_v171 | 0.9585 |
| Listeria_monocytogenes_EGD-e_169963_v1                   | Listeria_monocytogenes_1639_v171 | 0.9504 |
| Listeria_monocytogenes_EGD-e_169963                      | Listeria_monocytogenes_1639_v171 | 0.9504 |
| Listeria_monocytogenes_EGD_1334565                       | Listeria_monocytogenes_1639_v171 | 0.9723 |
| Listeria_monocytogenes_CFSAN002349_1299895               | Listeria_monocytogenes_1639_v171 | 0.939  |
| Listeria_monocytogenes_ATCC_19117_882095_v1              | Listeria_monocytogenes_1639_v171 | 0.9349 |
| Listeria_monocytogenes_ATCC_19117_882095                 | Listeria_monocytogenes_1639_v171 | 0.9345 |
| Listeria_monocytogenes_6179_1288295                      | Listeria_monocytogenes_1639_v171 | 0.938  |
| Listeria_monocytogenes_1639_v9                           | Listeria_monocytogenes_1639_v171 | 0.9109 |
| Listeria_monocytogenes_1639_v99                          | Listeria_monocytogenes_1639_v171 | 0.9312 |
| Listeria_monocytogenes_1639_v98                          | Listeria_monocytogenes_1639_v171 | 0.9479 |
| Listeria_monocytogenes_1639_v97                          | Listeria_monocytogenes_1639_v171 | 0.9287 |
| Listeria_monocytogenes_1639_v96                          | Listeria_monocytogenes_1639_v171 | 0.9305 |
| Listeria_monocytogenes_1639_v95                          | Listeria_monocytogenes_1639_v171 | 0.9305 |
| Listeria_monocytogenes_1639_v94                          | Listeria_monocytogenes_1639_v171 | 0.9312 |
| Listeria_monocytogenes_1639_v93                          | Listeria_monocytogenes_1639_v171 | 0.9474 |
| Listeria_monocytogenes_1639_v92                          | Listeria_monocytogenes_1639_v171 | 0.9308 |
| Listeria_monocytogenes_1639_v91                          | Listeria_monocytogenes_1639_v171 | 0.9172 |
| Listeria_monocytogenes_1639_v90                          | Listeria_monocytogenes_1639_v171 | 0.9479 |
| Listeria_monocytogenes_1639_v8                           | Listeria_monocytogenes_1639_v171 | 0.9378 |
| Listeria_monocytogenes_1639_v89                          | Listeria_monocytogenes_1639_v171 | 0.9314 |
| Listeria_monocytogenes_1639_v88                          | Listeria_monocytogenes_1639_v171 | 0.953  |
| Listeria_monocytogenes_1639_v87                          | Listeria_monocytogenes_1639_v171 | 0.9599 |
| Listeria_monocytogenes_1639_v86                          | Listeria_monocytogenes_1639_v171 | 0.9599 |
| Listeria_monocytogenes_1639_v85                          | Listeria_monocytogenes_1639_v171 | 0.9182 |
| Listeria_monocytogenes_1639_v84                          | Listeria_monocytogenes_1639_v171 | 0.9453 |
| Listeria_monocytogenes_1639_v83                          | Listeria_monocytogenes_1639_v171 | 0.9247 |
| Listeria_monocytogenes_1639_v82                          | Listeria_monocytogenes_1639_v171 | 0.9244 |
| Listeria_monocytogenes_1639_v81                          | Listeria_monocytogenes_1639_v171 | 0.9421 |
| Listeria_monocytogenes_1639_v80                          | Listeria_monocytogenes_1639_v171 | 0.9291 |

[illegible]



[illegible]



[illegible]



|                                                          |                                  |        |
|----------------------------------------------------------|----------------------------------|--------|
| Listeria_monocytogenes_1639_v27                          | Listeria_monocytogenes_1639_v173 | 0.9222 |
| Listeria_monocytogenes_1639_v26                          | Listeria_monocytogenes_1639_v173 | 0.9222 |
| Listeria_monocytogenes_1639_v25                          | Listeria_monocytogenes_1639_v173 | 0.9218 |
| Listeria_monocytogenes_1639_v24                          | Listeria_monocytogenes_1639_v173 | 0.9459 |
| Listeria_monocytogenes_1639_v23                          | Listeria_monocytogenes_1639_v173 | 0.9459 |
| Listeria_monocytogenes_1639_v22                          | Listeria_monocytogenes_1639_v173 | 0.953  |
| Listeria_monocytogenes_1639_v21                          | Listeria_monocytogenes_1639_v173 | 0.9456 |
| Listeria_monocytogenes_1639_v20                          | Listeria_monocytogenes_1639_v173 | 0.9529 |
| Listeria_monocytogenes_1639_v1                           | Listeria_monocytogenes_1639_v173 | 0.9183 |
| Listeria_monocytogenes_1639_v19                          | Listeria_monocytogenes_1639_v173 | 0.9526 |
| Listeria_monocytogenes_1639_v198                         | Listeria_monocytogenes_1639_v173 | 0.909  |
| Listeria_monocytogenes_1639_v197                         | Listeria_monocytogenes_1639_v173 | 0.9386 |
| Listeria_monocytogenes_1639_v196                         | Listeria_monocytogenes_1639_v173 | 0.9338 |
| Listeria_monocytogenes_1639_v195                         | Listeria_monocytogenes_1639_v173 | 0.9513 |
| Listeria_monocytogenes_1639_v194                         | Listeria_monocytogenes_1639_v173 | 0.9498 |
| Listeria_monocytogenes_1639_v193                         | Listeria_monocytogenes_1639_v173 | 0.9498 |
| Listeria_monocytogenes_1639_v192                         | Listeria_monocytogenes_1639_v173 | 0.9131 |
| Listeria_monocytogenes_1639_v191                         | Listeria_monocytogenes_1639_v173 | 0.959  |
| Listeria_monocytogenes_1639_v190                         | Listeria_monocytogenes_1639_v173 | 0.9633 |
| Listeria_monocytogenes_1639_v18                          | Listeria_monocytogenes_1639_v173 | 0.9422 |
| Listeria_monocytogenes_1639_v189                         | Listeria_monocytogenes_1639_v173 | 0.9622 |
| Listeria_monocytogenes_1639_v188                         | Listeria_monocytogenes_1639_v173 | 0.9625 |
| Listeria_monocytogenes_1639_v187                         | Listeria_monocytogenes_1639_v173 | 0.9629 |
| Listeria_monocytogenes_1639_v186                         | Listeria_monocytogenes_1639_v173 | 0.9633 |
| Listeria_monocytogenes_1639_v185                         | Listeria_monocytogenes_1639_v173 | 0.9633 |
| Listeria_monocytogenes_1639_v184                         | Listeria_monocytogenes_1639_v173 | 0.9625 |
| Listeria_monocytogenes_1639_v183                         | Listeria_monocytogenes_1639_v173 | 0.9567 |
| Listeria_monocytogenes_1639_v182                         | Listeria_monocytogenes_1639_v173 | 0.959  |
| Listeria_monocytogenes_1639_v181                         | Listeria_monocytogenes_1639_v173 | 0.9321 |
| Listeria_monocytogenes_1639_v180                         | Listeria_monocytogenes_1639_v173 | 0.9321 |
| Listeria_monocytogenes_1639_v17                          | Listeria_monocytogenes_1639_v173 | 0.9422 |
| Listeria_monocytogenes_1639_v179                         | Listeria_monocytogenes_1639_v173 | 0.9417 |
| Listeria_monocytogenes_1639_v178                         | Listeria_monocytogenes_1639_v173 | 0.9629 |
| Listeria_monocytogenes_1639_v177                         | Listeria_monocytogenes_1639_v173 | 0.9706 |
| Listeria_monocytogenes_1639_v176                         | Listeria_monocytogenes_1639_v173 | 0.9483 |
| Listeria_monocytogenes_1639_v175                         | Listeria_monocytogenes_1639_v173 | 0.9513 |
| Listeria_monocytogenes_1639_v174                         | Listeria_monocytogenes_1639_v173 | 0.9614 |
| Listeria_monocytogenes_1639_v173                         | Listeria_monocytogenes_1639_v173 | 0.0686 |
| Listeria_welshimeri_1643                                 | Listeria_monocytogenes_1639_v174 | 0.8832 |
| Listeria_welshimeri_serovar_6b_str_SLCC5334_386043       | Listeria_monocytogenes_1639_v174 | 0.8825 |
| Listeria_seeligeri_serovar_1_2b_str_SLCC3954_683837      | Listeria_monocytogenes_1639_v174 | 0.8964 |
| Listeria_seeligeri_FSL_S4-171_702452                     | Listeria_monocytogenes_1639_v174 | 0.8244 |
| Listeria_seeligeri_FSL_N1-067_702453                     | Listeria_monocytogenes_1639_v174 | 0.837  |
| Listeria_seeligeri_1640_v1                               | Listeria_monocytogenes_1639_v174 | 0.8935 |
| Listeria_seeligeri_1640                                  | Listeria_monocytogenes_1639_v174 | 0.8884 |
| Listeria_monocytogenes_WSLC1042_1457188                  | Listeria_monocytogenes_1639_v174 | 0.9442 |
| Listeria_monocytogenes_WSLC1001_1457187                  | Listeria_monocytogenes_1639_v174 | 0.9648 |
| Listeria_monocytogenes_SLCC7179_879090                   | Listeria_monocytogenes_1639_v174 | 0.9679 |
| Listeria_monocytogenes_SLCC5850_882096                   | Listeria_monocytogenes_1639_v174 | 0.9692 |
| Listeria_monocytogenes_SLCC2755_932919                   | Listeria_monocytogenes_1639_v174 | 0.9489 |
| Listeria_monocytogenes_SLCC2540_879089                   | Listeria_monocytogenes_1639_v174 | 0.946  |
| Listeria_monocytogenes_SLCC2479_882020                   | Listeria_monocytogenes_1639_v174 | 0.9547 |
| Listeria_monocytogenes_SLCC2378_879088                   | Listeria_monocytogenes_1639_v174 | 0.9457 |
| Listeria_monocytogenes_SLCC2376_882097                   | Listeria_monocytogenes_1639_v174 | 0.9557 |
| Listeria_monocytogenes_SLCC2372_932920                   | Listeria_monocytogenes_1639_v174 | 0.9475 |
| Listeria_monocytogenes_serotype_4b_str_LL195_1230340     | Listeria_monocytogenes_1639_v174 | 0.9515 |
| Listeria_monocytogenes_serotype_4b_str_LIS0087_1134669   | Listeria_monocytogenes_1639_v174 | 0.9452 |
| Listeria_monocytogenes_serotype_4b_str_F2365_265669      | Listeria_monocytogenes_1639_v174 | 0.9515 |
| Listeria_monocytogenes_serotype_4b_str_CLIP_80459_568819 | Listeria_monocytogenes_1639_v174 | 0.9557 |
| Listeria_monocytogenes_serotype_4b_str_81-0861_1196161   | Listeria_monocytogenes_1639_v174 | 0.9345 |
| Listeria_monocytogenes_serotype_4b_str_81-0592_1196160   | Listeria_monocytogenes_1639_v174 | 0.9356 |
| Listeria_monocytogenes_serotype_4b_str_81-0558_1196159   | Listeria_monocytogenes_1639_v174 | 0.9363 |
| Listeria_monocytogenes_serotype_4b_str_10-0809_1196162   | Listeria_monocytogenes_1639_v174 | 0.9356 |
| Listeria_monocytogenes_serotype_4b_str_02-6680_1196175   | Listeria_monocytogenes_1639_v174 | 0.952  |
| Listeria_monocytogenes_serotype_4b_str_02-6679_1196174   | Listeria_monocytogenes_1639_v174 | 0.952  |
| Listeria_monocytogenes_serotype_4b_str_02-1792_1196173   | Listeria_monocytogenes_1639_v174 | 0.936  |
| Listeria_monocytogenes_serotype_4b_str_02-1289_1196172   | Listeria_monocytogenes_1639_v174 | 0.936  |
| Listeria_monocytogenes_serotype_4b_str_02-1103_1196171   | Listeria_monocytogenes_1639_v174 | 0.936  |
| Listeria_monocytogenes_serotype_3c_str_10-5027_1196195   | Listeria_monocytogenes_1639_v174 | 0.954  |
| Listeria_monocytogenes_serotype_1_2c_str_10-5026_1196194 | Listeria_monocytogenes_1639_v174 | 0.9551 |
| Listeria_monocytogenes_serotype_1_2c_str_10-5025_1196193 | Listeria_monocytogenes_1639_v174 | 0.9551 |
| Listeria_monocytogenes_serotype_1_2b_str_10-0811_1196164 | Listeria_monocytogenes_1639_v174 | 0.9356 |
| Listeria_monocytogenes_serotype_1_2b_str_10-0810_1196163 | Listeria_monocytogenes_1639_v174 | 0.9356 |
| Listeria_monocytogenes_serotype_1_2a_str_99-6370_1196179 | Listeria_monocytogenes_1639_v174 | 0.9429 |
| Listeria_monocytogenes_serotype_1_2a_str_98-2035_1196178 | Listeria_monocytogenes_1639_v174 | 0.9429 |
| Listeria_monocytogenes_serotype_1_2a_str_95-0093_1196177 | Listeria_monocytogenes_1639_v174 | 0.949  |
| Listeria_monocytogenes_serotype_1_2a_str_88-0478_1196176 | Listeria_monocytogenes_1639_v174 | 0.9482 |
| Listeria_monocytogenes_serotype_1_2a_str_10-5024_1196192 | Listeria_monocytogenes_1639_v174 | 0.9494 |
| Listeria_monocytogenes_serotype_1_2a_str_10-4758_1196168 | Listeria_monocytogenes_1639_v174 | 0.9631 |
| Listeria_monocytogenes_serotype_1_2a_str_10-4754_1196167 | Listeria_monocytogenes_1639_v174 | 0.9631 |
| Listeria_monocytogenes_serotype_1_2a_str_10-1321_1196191 | Listeria_monocytogenes_1639_v174 | 0.9494 |
| Listeria_monocytogenes_serotype_1_2a_str_10-1047_1196190 | Listeria_monocytogenes_1639_v174 | 0.9497 |
| Listeria_monocytogenes_serotype_1_2a_str_10-1046_1196189 | Listeria_monocytogenes_1639_v174 | 0.9497 |
| Listeria_monocytogenes_serotype_1_2a_str_10-0934_1196170 | Listeria_monocytogenes_1639_v174 | 0.9798 |
| Listeria_monocytogenes_serotype_1_2a_str_10-0933_1196169 | Listeria_monocytogenes_1639_v174 | 0.9798 |
| Listeria_monocytogenes_serotype_1_2a_str_10-0815_1196188 | Listeria_monocytogenes_1639_v174 | 0.9444 |
| Listeria_monocytogenes_serotype_1_2a_str_10-0814_1196187 | Listeria_monocytogenes_1639_v174 | 0.949  |
| Listeria_monocytogenes_serotype_1_2a_str_10-0813_1196166 | Listeria_monocytogenes_1639_v174 | 0.9618 |
| Listeria_monocytogenes_serotype_1_2a_str_10-0812_1196165 | Listeria_monocytogenes_1639_v174 | 0.9618 |
| Listeria_monocytogenes_serotype_1_2a_str_08-7669_1196186 | Listeria_monocytogenes_1639_v174 | 0.9591 |
| Listeria_monocytogenes_serotype_1_2a_str_08-7374_1196185 | Listeria_monocytogenes_1639_v174 | 0.9494 |

|                                                          |                                  |        |
|----------------------------------------------------------|----------------------------------|--------|
| Listeria_monocytogenes_serotype_1_2a_str_08-6997_1196184 | Listeria_monocytogenes_1639_v174 | 0.9444 |
| Listeria_monocytogenes_serotype_1_2a_str_08-6569_1196183 | Listeria_monocytogenes_1639_v174 | 0.9444 |
| Listeria_monocytogenes_serotype_1_2a_str_08-6056_1196182 | Listeria_monocytogenes_1639_v174 | 0.9444 |
| Listeria_monocytogenes_serotype_1_2a_str_04-5457_1196181 | Listeria_monocytogenes_1639_v174 | 0.9494 |
| Listeria_monocytogenes_serotype_1_2a_str_02-5993_1196180 | Listeria_monocytogenes_1639_v174 | 0.949  |
| Listeria_monocytogenes_R479a_1437838                     | Listeria_monocytogenes_1639_v174 | 0.9479 |
| Listeria_monocytogenes_N53-1_1234142                     | Listeria_monocytogenes_1639_v174 | 0.9166 |
| Listeria_monocytogenes_M7_1030009                        | Listeria_monocytogenes_1639_v174 | 0.9136 |
| Listeria_monocytogenes_LO28_393132                       | Listeria_monocytogenes_1639_v174 | 0.9533 |
| Listeria_monocytogenes_L99_563174                        | Listeria_monocytogenes_1639_v174 | 0.9143 |
| Listeria_monocytogenes_L312_882094                       | Listeria_monocytogenes_1639_v174 | 0.9557 |
| Listeria_monocytogenes_J1816_930781                      | Listeria_monocytogenes_1639_v174 | 0.9343 |
| Listeria_monocytogenes_J1-220_930782                     | Listeria_monocytogenes_1639_v174 | 0.9289 |
| Listeria_monocytogenes_J0161_393130                      | Listeria_monocytogenes_1639_v174 | 0.9559 |
| Listeria_monocytogenes_HCC23_552536                      | Listeria_monocytogenes_1639_v174 | 0.914  |
| Listeria_monocytogenes_FSL_R2-561_393126                 | Listeria_monocytogenes_1639_v174 | 0.9533 |
| Listeria_monocytogenes_FSL_J1-208_393119                 | Listeria_monocytogenes_1639_v174 | 0.9176 |
| Listeria_monocytogenes_FSL_J1-175_393118                 | Listeria_monocytogenes_1639_v174 | 0.9496 |
| Listeria_monocytogenes_Finland_1998_393127               | Listeria_monocytogenes_1639_v174 | 0.9778 |
| Listeria_monocytogenes_EGD-e_169963_v1                   | Listeria_monocytogenes_1639_v174 | 0.9632 |
| Listeria_monocytogenes_EGD-e_169963                      | Listeria_monocytogenes_1639_v174 | 0.9632 |
| Listeria_monocytogenes_EGD_1334565                       | Listeria_monocytogenes_1639_v174 | 0.97   |
| Listeria_monocytogenes_CFSAN002349_1299895               | Listeria_monocytogenes_1639_v174 | 0.954  |
| Listeria_monocytogenes_ATCC_19117_882095_v1              | Listeria_monocytogenes_1639_v174 | 0.949  |
| Listeria_monocytogenes_ATCC_19117_882095                 | Listeria_monocytogenes_1639_v174 | 0.949  |
| Listeria_monocytogenes_6179_1288295                      | Listeria_monocytogenes_1639_v174 | 0.9427 |
| Listeria_monocytogenes_1639_v9                           | Listeria_monocytogenes_1639_v174 | 0.9208 |
| Listeria_monocytogenes_1639_v99                          | Listeria_monocytogenes_1639_v174 | 0.9351 |
| Listeria_monocytogenes_1639_v98                          | Listeria_monocytogenes_1639_v174 | 0.9517 |
| Listeria_monocytogenes_1639_v97                          | Listeria_monocytogenes_1639_v174 | 0.9426 |
| Listeria_monocytogenes_1639_v96                          | Listeria_monocytogenes_1639_v174 | 0.934  |
| Listeria_monocytogenes_1639_v95                          | Listeria_monocytogenes_1639_v174 | 0.934  |
| Listeria_monocytogenes_1639_v94                          | Listeria_monocytogenes_1639_v174 | 0.9344 |
| Listeria_monocytogenes_1639_v93                          | Listeria_monocytogenes_1639_v174 | 0.9509 |
| Listeria_monocytogenes_1639_v92                          | Listeria_monocytogenes_1639_v174 | 0.9351 |
| Listeria_monocytogenes_1639_v91                          | Listeria_monocytogenes_1639_v174 | 0.9331 |
| Listeria_monocytogenes_1639_v90                          | Listeria_monocytogenes_1639_v174 | 0.9517 |
| Listeria_monocytogenes_1639_v8                           | Listeria_monocytogenes_1639_v174 | 0.9373 |
| Listeria_monocytogenes_1639_v89                          | Listeria_monocytogenes_1639_v174 | 0.9478 |
| Listeria_monocytogenes_1639_v88                          | Listeria_monocytogenes_1639_v174 | 0.9596 |
| Listeria_monocytogenes_1639_v87                          | Listeria_monocytogenes_1639_v174 | 0.9571 |
| Listeria_monocytogenes_1639_v86                          | Listeria_monocytogenes_1639_v174 | 0.9567 |
| Listeria_monocytogenes_1639_v85                          | Listeria_monocytogenes_1639_v174 | 0.9338 |
| Listeria_monocytogenes_1639_v84                          | Listeria_monocytogenes_1639_v174 | 0.9583 |
| Listeria_monocytogenes_1639_v83                          | Listeria_monocytogenes_1639_v174 | 0.9378 |
| Listeria_monocytogenes_1639_v82                          | Listeria_monocytogenes_1639_v174 | 0.9375 |
| Listeria_monocytogenes_1639_v81                          | Listeria_monocytogenes_1639_v174 | 0.9576 |
| Listeria_monocytogenes_1639_v80                          | Listeria_monocytogenes_1639_v174 | 0.9411 |
| Listeria_monocytogenes_1639_v7                           | Listeria_monocytogenes_1639_v174 | 0.9373 |
| Listeria_monocytogenes_1639_v79                          | Listeria_monocytogenes_1639_v174 | 0.9555 |
| Listeria_monocytogenes_1639_v78                          | Listeria_monocytogenes_1639_v174 | 0.9569 |
| Listeria_monocytogenes_1639_v77                          | Listeria_monocytogenes_1639_v174 | 0.9568 |
| Listeria_monocytogenes_1639_v76                          | Listeria_monocytogenes_1639_v174 | 0.9459 |
| Listeria_monocytogenes_1639_v75                          | Listeria_monocytogenes_1639_v174 | 0.9143 |
| Listeria_monocytogenes_1639_v74                          | Listeria_monocytogenes_1639_v174 | 0.9563 |
| Listeria_monocytogenes_1639_v73                          | Listeria_monocytogenes_1639_v174 | 0.9482 |
| Listeria_monocytogenes_1639_v72                          | Listeria_monocytogenes_1639_v174 | 0.9366 |
| Listeria_monocytogenes_1639_v71                          | Listeria_monocytogenes_1639_v174 | 0.9416 |
| Listeria_monocytogenes_1639_v70                          | Listeria_monocytogenes_1639_v174 | 0.9515 |
| Listeria_monocytogenes_1639_v6                           | Listeria_monocytogenes_1639_v174 | 0.9366 |
| Listeria_monocytogenes_1639_v69                          | Listeria_monocytogenes_1639_v174 | 0.936  |
| Listeria_monocytogenes_1639_v68                          | Listeria_monocytogenes_1639_v174 | 0.9622 |
| Listeria_monocytogenes_1639_v67                          | Listeria_monocytogenes_1639_v174 | 0.9416 |
| Listeria_monocytogenes_1639_v66                          | Listeria_monocytogenes_1639_v174 | 0.9651 |
| Listeria_monocytogenes_1639_v65                          | Listeria_monocytogenes_1639_v174 | 0.9519 |
| Listeria_monocytogenes_1639_v64                          | Listeria_monocytogenes_1639_v174 | 0.9528 |
| Listeria_monocytogenes_1639_v63                          | Listeria_monocytogenes_1639_v174 | 0.9367 |
| Listeria_monocytogenes_1639_v62                          | Listeria_monocytogenes_1639_v174 | 0.9537 |
| Listeria_monocytogenes_1639_v61                          | Listeria_monocytogenes_1639_v174 | 0.9522 |
| Listeria_monocytogenes_1639_v60                          | Listeria_monocytogenes_1639_v174 | 0.958  |
| Listeria_monocytogenes_1639_v5                           | Listeria_monocytogenes_1639_v174 | 0.9012 |
| Listeria_monocytogenes_1639_v59                          | Listeria_monocytogenes_1639_v174 | 0.9385 |
| Listeria_monocytogenes_1639_v58                          | Listeria_monocytogenes_1639_v174 | 0.9385 |
| Listeria_monocytogenes_1639_v57                          | Listeria_monocytogenes_1639_v174 | 0.9316 |
| Listeria_monocytogenes_1639_v56                          | Listeria_monocytogenes_1639_v174 | 0.9389 |
| Listeria_monocytogenes_1639_v55                          | Listeria_monocytogenes_1639_v174 | 0.9274 |
| Listeria_monocytogenes_1639_v54                          | Listeria_monocytogenes_1639_v174 | 0.93   |
| Listeria_monocytogenes_1639_v53                          | Listeria_monocytogenes_1639_v174 | 0.9538 |
| Listeria_monocytogenes_1639_v52                          | Listeria_monocytogenes_1639_v174 | 0.9353 |
| Listeria_monocytogenes_1639_v51                          | Listeria_monocytogenes_1639_v174 | 0.9332 |
| Listeria_monocytogenes_1639_v50                          | Listeria_monocytogenes_1639_v174 | 0.9478 |
| Listeria_monocytogenes_1639_v4                           | Listeria_monocytogenes_1639_v174 | 0.9142 |
| Listeria_monocytogenes_1639_v49                          | Listeria_monocytogenes_1639_v174 | 0.9352 |
| Listeria_monocytogenes_1639_v48                          | Listeria_monocytogenes_1639_v174 | 0.949  |
| Listeria_monocytogenes_1639_v47                          | Listeria_monocytogenes_1639_v174 | 0.949  |
| Listeria_monocytogenes_1639_v46                          | Listeria_monocytogenes_1639_v174 | 0.9615 |
| Listeria_monocytogenes_1639_v45                          | Listeria_monocytogenes_1639_v174 | 0.9391 |
| Listeria_monocytogenes_1639_v44                          | Listeria_monocytogenes_1639_v174 | 0.9494 |
| Listeria_monocytogenes_1639_v43                          | Listeria_monocytogenes_1639_v174 | 0.9494 |
| Listeria_monocytogenes_1639_v42                          | Listeria_monocytogenes_1639_v174 | 0.9395 |
| Listeria_monocytogenes_1639_v41                          | Listeria_monocytogenes_1639_v174 | 0.9306 |

|                                                          |                                  |        |
|----------------------------------------------------------|----------------------------------|--------|
| Listeria_monocytogenes_1639_v40                          | Listeria_monocytogenes_1639_v174 | 0.9536 |
| Listeria_monocytogenes_1639_v3                           | Listeria_monocytogenes_1639_v174 | 0.9145 |
| Listeria_monocytogenes_1639_v39                          | Listeria_monocytogenes_1639_v174 | 0.9362 |
| Listeria_monocytogenes_1639_v38                          | Listeria_monocytogenes_1639_v174 | 0.9508 |
| Listeria_monocytogenes_1639_v37                          | Listeria_monocytogenes_1639_v174 | 0.9461 |
| Listeria_monocytogenes_1639_v36                          | Listeria_monocytogenes_1639_v174 | 0.9643 |
| Listeria_monocytogenes_1639_v35                          | Listeria_monocytogenes_1639_v174 | 0.9544 |
| Listeria_monocytogenes_1639_v34                          | Listeria_monocytogenes_1639_v174 | 0.9538 |
| Listeria_monocytogenes_1639_v33                          | Listeria_monocytogenes_1639_v174 | 0.9356 |
| Listeria_monocytogenes_1639_v32                          | Listeria_monocytogenes_1639_v174 | 0.9447 |
| Listeria_monocytogenes_1639_v31                          | Listeria_monocytogenes_1639_v174 | 0.9542 |
| Listeria_monocytogenes_1639_v30                          | Listeria_monocytogenes_1639_v174 | 0.9404 |
| Listeria_monocytogenes_1639_v2                           | Listeria_monocytogenes_1639_v174 | 0.907  |
| Listeria_monocytogenes_1639_v29                          | Listeria_monocytogenes_1639_v174 | 0.9397 |
| Listeria_monocytogenes_1639_v28                          | Listeria_monocytogenes_1639_v174 | 0.9447 |
| Listeria_monocytogenes_1639_v27                          | Listeria_monocytogenes_1639_v174 | 0.9352 |
| Listeria_monocytogenes_1639_v26                          | Listeria_monocytogenes_1639_v174 | 0.9348 |
| Listeria_monocytogenes_1639_v25                          | Listeria_monocytogenes_1639_v174 | 0.9345 |
| Listeria_monocytogenes_1639_v24                          | Listeria_monocytogenes_1639_v174 | 0.9289 |
| Listeria_monocytogenes_1639_v23                          | Listeria_monocytogenes_1639_v174 | 0.9289 |
| Listeria_monocytogenes_1639_v22                          | Listeria_monocytogenes_1639_v174 | 0.937  |
| Listeria_monocytogenes_1639_v21                          | Listeria_monocytogenes_1639_v174 | 0.9289 |
| Listeria_monocytogenes_1639_v20                          | Listeria_monocytogenes_1639_v174 | 0.9371 |
| Listeria_monocytogenes_1639_v1                           | Listeria_monocytogenes_1639_v174 | 0.9354 |
| Listeria_monocytogenes_1639_v19                          | Listeria_monocytogenes_1639_v174 | 0.9368 |
| Listeria_monocytogenes_1639_v198                         | Listeria_monocytogenes_1639_v174 | 0.9187 |
| Listeria_monocytogenes_1639_v197                         | Listeria_monocytogenes_1639_v174 | 0.9496 |
| Listeria_monocytogenes_1639_v196                         | Listeria_monocytogenes_1639_v174 | 0.953  |
| Listeria_monocytogenes_1639_v195                         | Listeria_monocytogenes_1639_v174 | 0.9568 |
| Listeria_monocytogenes_1639_v194                         | Listeria_monocytogenes_1639_v174 | 0.9561 |
| Listeria_monocytogenes_1639_v193                         | Listeria_monocytogenes_1639_v174 | 0.9565 |
| Listeria_monocytogenes_1639_v192                         | Listeria_monocytogenes_1639_v174 | 0.9097 |
| Listeria_monocytogenes_1639_v191                         | Listeria_monocytogenes_1639_v174 | 0.9812 |
| Listeria_monocytogenes_1639_v190                         | Listeria_monocytogenes_1639_v174 | 0.9828 |
| Listeria_monocytogenes_1639_v18                          | Listeria_monocytogenes_1639_v174 | 0.9257 |
| Listeria_monocytogenes_1639_v189                         | Listeria_monocytogenes_1639_v174 | 0.9821 |
| Listeria_monocytogenes_1639_v188                         | Listeria_monocytogenes_1639_v174 | 0.9773 |
| Listeria_monocytogenes_1639_v187                         | Listeria_monocytogenes_1639_v174 | 0.9824 |
| Listeria_monocytogenes_1639_v186                         | Listeria_monocytogenes_1639_v174 | 0.9832 |
| Listeria_monocytogenes_1639_v185                         | Listeria_monocytogenes_1639_v174 | 0.9828 |
| Listeria_monocytogenes_1639_v184                         | Listeria_monocytogenes_1639_v174 | 0.9824 |
| Listeria_monocytogenes_1639_v183                         | Listeria_monocytogenes_1639_v174 | 0.9739 |
| Listeria_monocytogenes_1639_v182                         | Listeria_monocytogenes_1639_v174 | 0.9762 |
| Listeria_monocytogenes_1639_v181                         | Listeria_monocytogenes_1639_v174 | 0.9336 |
| Listeria_monocytogenes_1639_v180                         | Listeria_monocytogenes_1639_v174 | 0.9336 |
| Listeria_monocytogenes_1639_v17                          | Listeria_monocytogenes_1639_v174 | 0.9257 |
| Listeria_monocytogenes_1639_v179                         | Listeria_monocytogenes_1639_v174 | 0.9668 |
| Listeria_monocytogenes_1639_v178                         | Listeria_monocytogenes_1639_v174 | 0.977  |
| Listeria_monocytogenes_1639_v177                         | Listeria_monocytogenes_1639_v174 | 0.9536 |
| Listeria_monocytogenes_1639_v176                         | Listeria_monocytogenes_1639_v174 | 0.9491 |
| Listeria_monocytogenes_1639_v175                         | Listeria_monocytogenes_1639_v174 | 0.9671 |
| Listeria_monocytogenes_1639_v174                         | Listeria_monocytogenes_1639_v174 | 0.0635 |
| Listeria_welshimeri_1643                                 | Listeria_monocytogenes_1639_v175 | 0.8802 |
| Listeria_welshimeri_serovar_6b_str_SLCC5334_386043       | Listeria_monocytogenes_1639_v175 | 0.8795 |
| Listeria_seeligeri_serovar_1_2b_str_SLCC3954_683837      | Listeria_monocytogenes_1639_v175 | 0.8871 |
| Listeria_seeligeri_FSL_S4-171_702452                     | Listeria_monocytogenes_1639_v175 | 0.8186 |
| Listeria_seeligeri_FSL_N1-067_702453                     | Listeria_monocytogenes_1639_v175 | 0.834  |
| Listeria_seeligeri_1640_v1                               | Listeria_monocytogenes_1639_v175 | 0.8847 |
| Listeria_seeligeri_1640                                  | Listeria_monocytogenes_1639_v175 | 0.8771 |
| Listeria_monocytogenes_WSLC1042_1457188                  | Listeria_monocytogenes_1639_v175 | 0.9344 |
| Listeria_monocytogenes_WSLC1001_1457187                  | Listeria_monocytogenes_1639_v175 | 0.9681 |
| Listeria_monocytogenes_SLCC7179_879090                   | Listeria_monocytogenes_1639_v175 | 0.9789 |
| Listeria_monocytogenes_SLCC5850_882096                   | Listeria_monocytogenes_1639_v175 | 0.9702 |
| Listeria_monocytogenes_SLCC2755_932919                   | Listeria_monocytogenes_1639_v175 | 0.9345 |
| Listeria_monocytogenes_SLCC2540_879089                   | Listeria_monocytogenes_1639_v175 | 0.9521 |
| Listeria_monocytogenes_SLCC2479_882020                   | Listeria_monocytogenes_1639_v175 | 0.9577 |
| Listeria_monocytogenes_SLCC2378_879088                   | Listeria_monocytogenes_1639_v175 | 0.9358 |
| Listeria_monocytogenes_SLCC2376_882097                   | Listeria_monocytogenes_1639_v175 | 0.9432 |
| Listeria_monocytogenes_SLCC2372_932920                   | Listeria_monocytogenes_1639_v175 | 0.9509 |
| Listeria_monocytogenes_serotype_4b_str_LL195_1230340     | Listeria_monocytogenes_1639_v175 | 0.9419 |
| Listeria_monocytogenes_serotype_4b_str_LIS0087_1134669   | Listeria_monocytogenes_1639_v175 | 0.9472 |
| Listeria_monocytogenes_serotype_4b_str_F2365_265669      | Listeria_monocytogenes_1639_v175 | 0.9419 |
| Listeria_monocytogenes_serotype_4b_str_CLIP_80459_568819 | Listeria_monocytogenes_1639_v175 | 0.9438 |
| Listeria_monocytogenes_serotype_4b_str_81-0861_1196161   | Listeria_monocytogenes_1639_v175 | 0.9274 |
| Listeria_monocytogenes_serotype_4b_str_81-0592_1196160   | Listeria_monocytogenes_1639_v175 | 0.9285 |
| Listeria_monocytogenes_serotype_4b_str_81-0558_1196159   | Listeria_monocytogenes_1639_v175 | 0.9292 |
| Listeria_monocytogenes_serotype_4b_str_10-0809_1196162   | Listeria_monocytogenes_1639_v175 | 0.9285 |
| Listeria_monocytogenes_serotype_4b_str_02-6680_1196175   | Listeria_monocytogenes_1639_v175 | 0.9431 |
| Listeria_monocytogenes_serotype_4b_str_02-6679_1196174   | Listeria_monocytogenes_1639_v175 | 0.9431 |
| Listeria_monocytogenes_serotype_4b_str_02-1792_1196173   | Listeria_monocytogenes_1639_v175 | 0.9296 |
| Listeria_monocytogenes_serotype_4b_str_02-1289_1196172   | Listeria_monocytogenes_1639_v175 | 0.9296 |
| Listeria_monocytogenes_serotype_4b_str_02-1103_1196171   | Listeria_monocytogenes_1639_v175 | 0.9296 |
| Listeria_monocytogenes_serotype_3c_str_10-5027_1196195   | Listeria_monocytogenes_1639_v175 | 0.9577 |
| Listeria_monocytogenes_serotype_1_2c_str_10-5026_1196194 | Listeria_monocytogenes_1639_v175 | 0.9588 |
| Listeria_monocytogenes_serotype_1_2c_str_10-5025_1196193 | Listeria_monocytogenes_1639_v175 | 0.9588 |
| Listeria_monocytogenes_serotype_1_2b_str_10-0811_1196164 | Listeria_monocytogenes_1639_v175 | 0.9429 |
| Listeria_monocytogenes_serotype_1_2b_str_10-0810_1196163 | Listeria_monocytogenes_1639_v175 | 0.9429 |
| Listeria_monocytogenes_serotype_1_2a_str_99-6370_1196179 | Listeria_monocytogenes_1639_v175 | 0.9516 |
| Listeria_monocytogenes_serotype_1_2a_str_98-2035_1196178 | Listeria_monocytogenes_1639_v175 | 0.9516 |
| Listeria_monocytogenes_serotype_1_2a_str_95-0093_1196177 | Listeria_monocytogenes_1639_v175 | 0.9569 |
| Listeria_monocytogenes_serotype_1_2a_str_88-0478_1196176 | Listeria_monocytogenes_1639_v175 | 0.9568 |

|                                                          |                                  |        |
|----------------------------------------------------------|----------------------------------|--------|
| Listeria_monocytogenes_serotype_1_2a_str_10-5024_1196192 | Listeria_monocytogenes_1639_v175 | 0.958  |
| Listeria_monocytogenes_serotype_1_2a_str_10-4758_1196168 | Listeria_monocytogenes_1639_v175 | 0.9703 |
| Listeria_monocytogenes_serotype_1_2a_str_10-4754_1196167 | Listeria_monocytogenes_1639_v175 | 0.9703 |
| Listeria_monocytogenes_serotype_1_2a_str_10-1321_1196191 | Listeria_monocytogenes_1639_v175 | 0.958  |
| Listeria_monocytogenes_serotype_1_2a_str_10-1047_1196190 | Listeria_monocytogenes_1639_v175 | 0.9576 |
| Listeria_monocytogenes_serotype_1_2a_str_10-1046_1196189 | Listeria_monocytogenes_1639_v175 | 0.9576 |
| Listeria_monocytogenes_serotype_1_2a_str_10-0934_1196170 | Listeria_monocytogenes_1639_v175 | 0.9672 |
| Listeria_monocytogenes_serotype_1_2a_str_10-0933_1196169 | Listeria_monocytogenes_1639_v175 | 0.9672 |
| Listeria_monocytogenes_serotype_1_2a_str_10-0815_1196188 | Listeria_monocytogenes_1639_v175 | 0.953  |
| Listeria_monocytogenes_serotype_1_2a_str_10-0814_1196187 | Listeria_monocytogenes_1639_v175 | 0.9576 |
| Listeria_monocytogenes_serotype_1_2a_str_10-0813_1196166 | Listeria_monocytogenes_1639_v175 | 0.9663 |
| Listeria_monocytogenes_serotype_1_2a_str_10-0812_1196165 | Listeria_monocytogenes_1639_v175 | 0.9663 |
| Listeria_monocytogenes_serotype_1_2a_str_08-7669_1196186 | Listeria_monocytogenes_1639_v175 | 0.9549 |
| Listeria_monocytogenes_serotype_1_2a_str_08-7374_1196185 | Listeria_monocytogenes_1639_v175 | 0.958  |
| Listeria_monocytogenes_serotype_1_2a_str_08-6997_1196184 | Listeria_monocytogenes_1639_v175 | 0.953  |
| Listeria_monocytogenes_serotype_1_2a_str_08-6569_1196183 | Listeria_monocytogenes_1639_v175 | 0.953  |
| Listeria_monocytogenes_serotype_1_2a_str_08-6056_1196182 | Listeria_monocytogenes_1639_v175 | 0.953  |
| Listeria_monocytogenes_serotype_1_2a_str_04-5457_1196181 | Listeria_monocytogenes_1639_v175 | 0.958  |
| Listeria_monocytogenes_serotype_1_2a_str_02-5993_1196180 | Listeria_monocytogenes_1639_v175 | 0.9576 |
| Listeria_monocytogenes_R479a_1437838                     | Listeria_monocytogenes_1639_v175 | 0.9543 |
| Listeria_monocytogenes_N53-1_1234142                     | Listeria_monocytogenes_1639_v175 | 0.912  |
| Listeria_monocytogenes_M7_1030009                        | Listeria_monocytogenes_1639_v175 | 0.9105 |
| Listeria_monocytogenes_LO28_393132                       | Listeria_monocytogenes_1639_v175 | 0.9567 |
| Listeria_monocytogenes_L99_563174                        | Listeria_monocytogenes_1639_v175 | 0.9112 |
| Listeria_monocytogenes_L312_882094                       | Listeria_monocytogenes_1639_v175 | 0.9438 |
| Listeria_monocytogenes_J1816_930781                      | Listeria_monocytogenes_1639_v175 | 0.925  |
| Listeria_monocytogenes_J1-220_930782                     | Listeria_monocytogenes_1639_v175 | 0.9298 |
| Listeria_monocytogenes_J0161_393130                      | Listeria_monocytogenes_1639_v175 | 0.9517 |
| Listeria_monocytogenes_HCC23_552536                      | Listeria_monocytogenes_1639_v175 | 0.9109 |
| Listeria_monocytogenes_FSL_R2-561_393126                 | Listeria_monocytogenes_1639_v175 | 0.9566 |
| Listeria_monocytogenes_FSL_J1-208_393119                 | Listeria_monocytogenes_1639_v175 | 0.9106 |
| Listeria_monocytogenes_FSL_J1-175_393118                 | Listeria_monocytogenes_1639_v175 | 0.9523 |
| Listeria_monocytogenes_Finland_1998_393127               | Listeria_monocytogenes_1639_v175 | 0.9683 |
| Listeria_monocytogenes_EGD-e_169963_v1                   | Listeria_monocytogenes_1639_v175 | 0.9562 |
| Listeria_monocytogenes_EGD-e_169963                      | Listeria_monocytogenes_1639_v175 | 0.9562 |
| Listeria_monocytogenes_EGD_1334565                       | Listeria_monocytogenes_1639_v175 | 0.971  |
| Listeria_monocytogenes_CFSAN002349_1299895               | Listeria_monocytogenes_1639_v175 | 0.9424 |
| Listeria_monocytogenes_ATCC_19117_882095_v1              | Listeria_monocytogenes_1639_v175 | 0.9383 |
| Listeria_monocytogenes_ATCC_19117_882095                 | Listeria_monocytogenes_1639_v175 | 0.9383 |
| Listeria_monocytogenes_6179_1288295                      | Listeria_monocytogenes_1639_v175 | 0.9461 |
| Listeria_monocytogenes_1639_v9                           | Listeria_monocytogenes_1639_v175 | 0.9266 |
| Listeria_monocytogenes_1639_v99                          | Listeria_monocytogenes_1639_v175 | 0.925  |
| Listeria_monocytogenes_1639_v98                          | Listeria_monocytogenes_1639_v175 | 0.9471 |
| Listeria_monocytogenes_1639_v97                          | Listeria_monocytogenes_1639_v175 | 0.9336 |
| Listeria_monocytogenes_1639_v96                          | Listeria_monocytogenes_1639_v175 | 0.9247 |
| Listeria_monocytogenes_1639_v95                          | Listeria_monocytogenes_1639_v175 | 0.9248 |
| Listeria_monocytogenes_1639_v94                          | Listeria_monocytogenes_1639_v175 | 0.9251 |
| Listeria_monocytogenes_1639_v93                          | Listeria_monocytogenes_1639_v175 | 0.9542 |
| Listeria_monocytogenes_1639_v92                          | Listeria_monocytogenes_1639_v175 | 0.9247 |
| Listeria_monocytogenes_1639_v91                          | Listeria_monocytogenes_1639_v175 | 0.9351 |
| Listeria_monocytogenes_1639_v90                          | Listeria_monocytogenes_1639_v175 | 0.9471 |
| Listeria_monocytogenes_1639_v8                           | Listeria_monocytogenes_1639_v175 | 0.9448 |
| Listeria_monocytogenes_1639_v89                          | Listeria_monocytogenes_1639_v175 | 0.936  |
| Listeria_monocytogenes_1639_v88                          | Listeria_monocytogenes_1639_v175 | 0.9618 |
| Listeria_monocytogenes_1639_v87                          | Listeria_monocytogenes_1639_v175 | 0.9623 |
| Listeria_monocytogenes_1639_v86                          | Listeria_monocytogenes_1639_v175 | 0.9619 |
| Listeria_monocytogenes_1639_v85                          | Listeria_monocytogenes_1639_v175 | 0.9268 |
| Listeria_monocytogenes_1639_v84                          | Listeria_monocytogenes_1639_v175 | 0.9617 |
| Listeria_monocytogenes_1639_v83                          | Listeria_monocytogenes_1639_v175 | 0.9303 |
| Listeria_monocytogenes_1639_v82                          | Listeria_monocytogenes_1639_v175 | 0.9296 |
| Listeria_monocytogenes_1639_v81                          | Listeria_monocytogenes_1639_v175 | 0.9633 |
| Listeria_monocytogenes_1639_v80                          | Listeria_monocytogenes_1639_v175 | 0.9465 |
| Listeria_monocytogenes_1639_v7                           | Listeria_monocytogenes_1639_v175 | 0.9448 |
| Listeria_monocytogenes_1639_v79                          | Listeria_monocytogenes_1639_v175 | 0.9592 |
| Listeria_monocytogenes_1639_v78                          | Listeria_monocytogenes_1639_v175 | 0.9629 |
| Listeria_monocytogenes_1639_v77                          | Listeria_monocytogenes_1639_v175 | 0.954  |
| Listeria_monocytogenes_1639_v76                          | Listeria_monocytogenes_1639_v175 | 0.9568 |
| Listeria_monocytogenes_1639_v75                          | Listeria_monocytogenes_1639_v175 | 0.9112 |
| Listeria_monocytogenes_1639_v74                          | Listeria_monocytogenes_1639_v175 | 0.9446 |
| Listeria_monocytogenes_1639_v73                          | Listeria_monocytogenes_1639_v175 | 0.9528 |
| Listeria_monocytogenes_1639_v72                          | Listeria_monocytogenes_1639_v175 | 0.9291 |
| Listeria_monocytogenes_1639_v71                          | Listeria_monocytogenes_1639_v175 | 0.9416 |
| Listeria_monocytogenes_1639_v70                          | Listeria_monocytogenes_1639_v175 | 0.956  |
| Listeria_monocytogenes_1639_v6                           | Listeria_monocytogenes_1639_v175 | 0.9441 |
| Listeria_monocytogenes_1639_v69                          | Listeria_monocytogenes_1639_v175 | 0.9289 |
| Listeria_monocytogenes_1639_v68                          | Listeria_monocytogenes_1639_v175 | 0.9496 |
| Listeria_monocytogenes_1639_v67                          | Listeria_monocytogenes_1639_v175 | 0.9493 |
| Listeria_monocytogenes_1639_v66                          | Listeria_monocytogenes_1639_v175 | 0.9684 |
| Listeria_monocytogenes_1639_v65                          | Listeria_monocytogenes_1639_v175 | 0.9586 |
| Listeria_monocytogenes_1639_v64                          | Listeria_monocytogenes_1639_v175 | 0.9618 |
| Listeria_monocytogenes_1639_v63                          | Listeria_monocytogenes_1639_v175 | 0.942  |
| Listeria_monocytogenes_1639_v62                          | Listeria_monocytogenes_1639_v175 | 0.9593 |
| Listeria_monocytogenes_1639_v61                          | Listeria_monocytogenes_1639_v175 | 0.9594 |
| Listeria_monocytogenes_1639_v60                          | Listeria_monocytogenes_1639_v175 | 0.9527 |
| Listeria_monocytogenes_1639_v5                           | Listeria_monocytogenes_1639_v175 | 0.8965 |
| Listeria_monocytogenes_1639_v59                          | Listeria_monocytogenes_1639_v175 | 0.9386 |
| Listeria_monocytogenes_1639_v58                          | Listeria_monocytogenes_1639_v175 | 0.9303 |
| Listeria_monocytogenes_1639_v57                          | Listeria_monocytogenes_1639_v175 | 0.9213 |
| Listeria_monocytogenes_1639_v56                          | Listeria_monocytogenes_1639_v175 | 0.9303 |
| Listeria_monocytogenes_1639_v55                          | Listeria_monocytogenes_1639_v175 | 0.9171 |
| Listeria_monocytogenes_1639_v54                          | Listeria_monocytogenes_1639_v175 | 0.9275 |

|                                                          |                                  |        |
|----------------------------------------------------------|----------------------------------|--------|
| Listeria_monocytogenes_1639_v53                          | Listeria_monocytogenes_1639_v175 | 0.9515 |
| Listeria_monocytogenes_1639_v52                          | Listeria_monocytogenes_1639_v175 | 0.9366 |
| Listeria_monocytogenes_1639_v51                          | Listeria_monocytogenes_1639_v175 | 0.925  |
| Listeria_monocytogenes_1639_v50                          | Listeria_monocytogenes_1639_v175 | 0.9565 |
| Listeria_monocytogenes_1639_v4                           | Listeria_monocytogenes_1639_v175 | 0.9093 |
| Listeria_monocytogenes_1639_v49                          | Listeria_monocytogenes_1639_v175 | 0.9289 |
| Listeria_monocytogenes_1639_v48                          | Listeria_monocytogenes_1639_v175 | 0.9535 |
| Listeria_monocytogenes_1639_v47                          | Listeria_monocytogenes_1639_v175 | 0.9595 |
| Listeria_monocytogenes_1639_v46                          | Listeria_monocytogenes_1639_v175 | 0.95   |
| Listeria_monocytogenes_1639_v45                          | Listeria_monocytogenes_1639_v175 | 0.9477 |
| Listeria_monocytogenes_1639_v44                          | Listeria_monocytogenes_1639_v175 | 0.958  |
| Listeria_monocytogenes_1639_v43                          | Listeria_monocytogenes_1639_v175 | 0.958  |
| Listeria_monocytogenes_1639_v42                          | Listeria_monocytogenes_1639_v175 | 0.9392 |
| Listeria_monocytogenes_1639_v41                          | Listeria_monocytogenes_1639_v175 | 0.9362 |
| Listeria_monocytogenes_1639_v40                          | Listeria_monocytogenes_1639_v175 | 0.9585 |
| Listeria_monocytogenes_1639_v3                           | Listeria_monocytogenes_1639_v175 | 0.9097 |
| Listeria_monocytogenes_1639_v39                          | Listeria_monocytogenes_1639_v175 | 0.9409 |
| Listeria_monocytogenes_1639_v38                          | Listeria_monocytogenes_1639_v175 | 0.9534 |
| Listeria_monocytogenes_1639_v37                          | Listeria_monocytogenes_1639_v175 | 0.9461 |
| Listeria_monocytogenes_1639_v36                          | Listeria_monocytogenes_1639_v175 | 0.9489 |
| Listeria_monocytogenes_1639_v35                          | Listeria_monocytogenes_1639_v175 | 0.9577 |
| Listeria_monocytogenes_1639_v34                          | Listeria_monocytogenes_1639_v175 | 0.9564 |
| Listeria_monocytogenes_1639_v33                          | Listeria_monocytogenes_1639_v175 | 0.9429 |
| Listeria_monocytogenes_1639_v32                          | Listeria_monocytogenes_1639_v175 | 0.9484 |
| Listeria_monocytogenes_1639_v31                          | Listeria_monocytogenes_1639_v175 | 0.9568 |
| Listeria_monocytogenes_1639_v30                          | Listeria_monocytogenes_1639_v175 | 0.9337 |
| Listeria_monocytogenes_1639_v2                           | Listeria_monocytogenes_1639_v175 | 0.8979 |
| Listeria_monocytogenes_1639_v29                          | Listeria_monocytogenes_1639_v175 | 0.9454 |
| Listeria_monocytogenes_1639_v28                          | Listeria_monocytogenes_1639_v175 | 0.9507 |
| Listeria_monocytogenes_1639_v27                          | Listeria_monocytogenes_1639_v175 | 0.9405 |
| Listeria_monocytogenes_1639_v26                          | Listeria_monocytogenes_1639_v175 | 0.9401 |
| Listeria_monocytogenes_1639_v25                          | Listeria_monocytogenes_1639_v175 | 0.9398 |
| Listeria_monocytogenes_1639_v24                          | Listeria_monocytogenes_1639_v175 | 0.9283 |
| Listeria_monocytogenes_1639_v23                          | Listeria_monocytogenes_1639_v175 | 0.9283 |
| Listeria_monocytogenes_1639_v22                          | Listeria_monocytogenes_1639_v175 | 0.9435 |
| Listeria_monocytogenes_1639_v21                          | Listeria_monocytogenes_1639_v175 | 0.9291 |
| Listeria_monocytogenes_1639_v20                          | Listeria_monocytogenes_1639_v175 | 0.9372 |
| Listeria_monocytogenes_1639_v1                           | Listeria_monocytogenes_1639_v175 | 0.9396 |
| Listeria_monocytogenes_1639_v19                          | Listeria_monocytogenes_1639_v175 | 0.9369 |
| Listeria_monocytogenes_1639_v198                         | Listeria_monocytogenes_1639_v175 | 0.9144 |
| Listeria_monocytogenes_1639_v197                         | Listeria_monocytogenes_1639_v175 | 0.9428 |
| Listeria_monocytogenes_1639_v196                         | Listeria_monocytogenes_1639_v175 | 0.9545 |
| Listeria_monocytogenes_1639_v195                         | Listeria_monocytogenes_1639_v175 | 0.9451 |
| Listeria_monocytogenes_1639_v194                         | Listeria_monocytogenes_1639_v175 | 0.9436 |
| Listeria_monocytogenes_1639_v193                         | Listeria_monocytogenes_1639_v175 | 0.944  |
| Listeria_monocytogenes_1639_v192                         | Listeria_monocytogenes_1639_v175 | 0.9025 |
| Listeria_monocytogenes_1639_v191                         | Listeria_monocytogenes_1639_v175 | 0.9694 |
| Listeria_monocytogenes_1639_v190                         | Listeria_monocytogenes_1639_v175 | 0.9694 |
| Listeria_monocytogenes_1639_v18                          | Listeria_monocytogenes_1639_v175 | 0.9166 |
| Listeria_monocytogenes_1639_v189                         | Listeria_monocytogenes_1639_v175 | 0.969  |
| Listeria_monocytogenes_1639_v188                         | Listeria_monocytogenes_1639_v175 | 0.9674 |
| Listeria_monocytogenes_1639_v187                         | Listeria_monocytogenes_1639_v175 | 0.9694 |
| Listeria_monocytogenes_1639_v186                         | Listeria_monocytogenes_1639_v175 | 0.9698 |
| Listeria_monocytogenes_1639_v185                         | Listeria_monocytogenes_1639_v175 | 0.9694 |
| Listeria_monocytogenes_1639_v184                         | Listeria_monocytogenes_1639_v175 | 0.9694 |
| Listeria_monocytogenes_1639_v183                         | Listeria_monocytogenes_1639_v175 | 0.9663 |
| Listeria_monocytogenes_1639_v182                         | Listeria_monocytogenes_1639_v175 | 0.9686 |
| Listeria_monocytogenes_1639_v181                         | Listeria_monocytogenes_1639_v175 | 0.9226 |
| Listeria_monocytogenes_1639_v180                         | Listeria_monocytogenes_1639_v175 | 0.9226 |
| Listeria_monocytogenes_1639_v17                          | Listeria_monocytogenes_1639_v175 | 0.9166 |
| Listeria_monocytogenes_1639_v179                         | Listeria_monocytogenes_1639_v175 | 0.9586 |
| Listeria_monocytogenes_1639_v178                         | Listeria_monocytogenes_1639_v175 | 0.9714 |
| Listeria_monocytogenes_1639_v177                         | Listeria_monocytogenes_1639_v175 | 0.9416 |
| Listeria_monocytogenes_1639_v176                         | Listeria_monocytogenes_1639_v175 | 0.939  |
| Listeria_monocytogenes_1639_v175                         | Listeria_monocytogenes_1639_v175 | 0.0633 |
| Listeria_welshimeri_1643                                 | Listeria_monocytogenes_1639_v176 | 0.8865 |
| Listeria_welshimeri_serovar_6b_str_SLCC5334_386043       | Listeria_monocytogenes_1639_v176 | 0.8862 |
| Listeria_seeligeri_serovar_1_2b_str_SLCC3954_683837      | Listeria_monocytogenes_1639_v176 | 0.8919 |
| Listeria_seeligeri_FSL_S4-171_702452                     | Listeria_monocytogenes_1639_v176 | 0.8299 |
| Listeria_seeligeri_FSL_N1-067_702453                     | Listeria_monocytogenes_1639_v176 | 0.8288 |
| Listeria_seeligeri_1640_v1                               | Listeria_monocytogenes_1639_v176 | 0.8934 |
| Listeria_seeligeri_1640                                  | Listeria_monocytogenes_1639_v176 | 0.8844 |
| Listeria_monocytogenes_WSLC1042_1457188                  | Listeria_monocytogenes_1639_v176 | 0.9378 |
| Listeria_monocytogenes_WSLC1001_1457187                  | Listeria_monocytogenes_1639_v176 | 0.9295 |
| Listeria_monocytogenes_SLCC7179_879090                   | Listeria_monocytogenes_1639_v176 | 0.9394 |
| Listeria_monocytogenes_SLCC5850_882096                   | Listeria_monocytogenes_1639_v176 | 0.9338 |
| Listeria_monocytogenes_SLCC2755_932919                   | Listeria_monocytogenes_1639_v176 | 0.9302 |
| Listeria_monocytogenes_SLCC2540_879089                   | Listeria_monocytogenes_1639_v176 | 0.9299 |
| Listeria_monocytogenes_SLCC2479_882020                   | Listeria_monocytogenes_1639_v176 | 0.927  |
| Listeria_monocytogenes_SLCC2378_879088                   | Listeria_monocytogenes_1639_v176 | 0.9392 |
| Listeria_monocytogenes_SLCC2376_882097                   | Listeria_monocytogenes_1639_v176 | 0.9657 |
| Listeria_monocytogenes_SLCC2372_932920                   | Listeria_monocytogenes_1639_v176 | 0.9196 |
| Listeria_monocytogenes_serotype_4b_str_LL195_1230340     | Listeria_monocytogenes_1639_v176 | 0.9451 |
| Listeria_monocytogenes_serotype_4b_str_LIS0087_1134669   | Listeria_monocytogenes_1639_v176 | 0.9102 |
| Listeria_monocytogenes_serotype_4b_str_F2365_265669      | Listeria_monocytogenes_1639_v176 | 0.9451 |
| Listeria_monocytogenes_serotype_4b_str_CLIP_80459_568819 | Listeria_monocytogenes_1639_v176 | 0.9485 |
| Listeria_monocytogenes_serotype_4b_str_81-0861_1196161   | Listeria_monocytogenes_1639_v176 | 0.9284 |
| Listeria_monocytogenes_serotype_4b_str_81-0592_1196160   | Listeria_monocytogenes_1639_v176 | 0.9295 |
| Listeria_monocytogenes_serotype_4b_str_81-0558_1196159   | Listeria_monocytogenes_1639_v176 | 0.9306 |
| Listeria_monocytogenes_serotype_4b_str_10-0809_1196162   | Listeria_monocytogenes_1639_v176 | 0.9295 |
| Listeria_monocytogenes_serotype_4b_str_02-6680_1196175   | Listeria_monocytogenes_1639_v176 | 0.9475 |

|                                                          |                                  |        |
|----------------------------------------------------------|----------------------------------|--------|
| Listeria_monocytogenes_serotype_4b_str_02-6679_1196174   | Listeria_monocytogenes_1639_v176 | 0.9475 |
| Listeria_monocytogenes_serotype_4b_str_02-1792_1196173   | Listeria_monocytogenes_1639_v176 | 0.9295 |
| Listeria_monocytogenes_serotype_4b_str_02-1289_1196172   | Listeria_monocytogenes_1639_v176 | 0.9295 |
| Listeria_monocytogenes_serotype_4b_str_02-1103_1196171   | Listeria_monocytogenes_1639_v176 | 0.9295 |
| Listeria_monocytogenes_serotype_3c_str_10-5027_1196195   | Listeria_monocytogenes_1639_v176 | 0.9258 |
| Listeria_monocytogenes_serotype_1_2c_str_10-5026_1196194 | Listeria_monocytogenes_1639_v176 | 0.927  |
| Listeria_monocytogenes_serotype_1_2c_str_10-5025_1196193 | Listeria_monocytogenes_1639_v176 | 0.927  |
| Listeria_monocytogenes_serotype_1_2b_str_10-0811_1196164 | Listeria_monocytogenes_1639_v176 | 0.9227 |
| Listeria_monocytogenes_serotype_1_2b_str_10-0810_1196163 | Listeria_monocytogenes_1639_v176 | 0.9227 |
| Listeria_monocytogenes_serotype_1_2a_str_99-6370_1196179 | Listeria_monocytogenes_1639_v176 | 0.9121 |
| Listeria_monocytogenes_serotype_1_2a_str_98-2035_1196178 | Listeria_monocytogenes_1639_v176 | 0.9121 |
| Listeria_monocytogenes_serotype_1_2a_str_95-0093_1196177 | Listeria_monocytogenes_1639_v176 | 0.918  |
| Listeria_monocytogenes_serotype_1_2a_str_88-0478_1196176 | Listeria_monocytogenes_1639_v176 | 0.9172 |
| Listeria_monocytogenes_serotype_1_2a_str_10-5024_1196192 | Listeria_monocytogenes_1639_v176 | 0.9183 |
| Listeria_monocytogenes_serotype_1_2a_str_10-4758_1196168 | Listeria_monocytogenes_1639_v176 | 0.9343 |
| Listeria_monocytogenes_serotype_1_2a_str_10-4754_1196167 | Listeria_monocytogenes_1639_v176 | 0.9343 |
| Listeria_monocytogenes_serotype_1_2a_str_10-1321_1196191 | Listeria_monocytogenes_1639_v176 | 0.9183 |
| Listeria_monocytogenes_serotype_1_2a_str_10-1047_1196190 | Listeria_monocytogenes_1639_v176 | 0.9187 |
| Listeria_monocytogenes_serotype_1_2a_str_10-1046_1196189 | Listeria_monocytogenes_1639_v176 | 0.9187 |
| Listeria_monocytogenes_serotype_1_2a_str_10-0934_1196170 | Listeria_monocytogenes_1639_v176 | 0.9452 |
| Listeria_monocytogenes_serotype_1_2a_str_10-0933_1196169 | Listeria_monocytogenes_1639_v176 | 0.9452 |
| Listeria_monocytogenes_serotype_1_2a_str_10-0815_1196188 | Listeria_monocytogenes_1639_v176 | 0.9135 |
| Listeria_monocytogenes_serotype_1_2a_str_10-0814_1196187 | Listeria_monocytogenes_1639_v176 | 0.918  |
| Listeria_monocytogenes_serotype_1_2a_str_10-0813_1196166 | Listeria_monocytogenes_1639_v176 | 0.9267 |
| Listeria_monocytogenes_serotype_1_2a_str_10-0812_1196165 | Listeria_monocytogenes_1639_v176 | 0.9267 |
| Listeria_monocytogenes_serotype_1_2a_str_08-7669_1196186 | Listeria_monocytogenes_1639_v176 | 0.9279 |
| Listeria_monocytogenes_serotype_1_2a_str_08-7374_1196185 | Listeria_monocytogenes_1639_v176 | 0.9183 |
| Listeria_monocytogenes_serotype_1_2a_str_08-6997_1196184 | Listeria_monocytogenes_1639_v176 | 0.9135 |
| Listeria_monocytogenes_serotype_1_2a_str_08-6569_1196183 | Listeria_monocytogenes_1639_v176 | 0.9135 |
| Listeria_monocytogenes_serotype_1_2a_str_08-6056_1196182 | Listeria_monocytogenes_1639_v176 | 0.9135 |
| Listeria_monocytogenes_serotype_1_2a_str_04-5457_1196181 | Listeria_monocytogenes_1639_v176 | 0.9183 |
| Listeria_monocytogenes_serotype_1_2a_str_02-5993_1196180 | Listeria_monocytogenes_1639_v176 | 0.918  |
| Listeria_monocytogenes_R479a_1437838                     | Listeria_monocytogenes_1639_v176 | 0.9177 |
| Listeria_monocytogenes_N53-1_1234142                     | Listeria_monocytogenes_1639_v176 | 0.8946 |
| Listeria_monocytogenes_M7_1030009                        | Listeria_monocytogenes_1639_v176 | 0.9276 |
| Listeria_monocytogenes_LO28_393132                       | Listeria_monocytogenes_1639_v176 | 0.9256 |
| Listeria_monocytogenes_L99_563174                        | Listeria_monocytogenes_1639_v176 | 0.9283 |
| Listeria_monocytogenes_L312_882094                       | Listeria_monocytogenes_1639_v176 | 0.9485 |
| Listeria_monocytogenes_J1816_930781                      | Listeria_monocytogenes_1639_v176 | 0.9271 |
| Listeria_monocytogenes_J1-220_930782                     | Listeria_monocytogenes_1639_v176 | 0.9233 |
| Listeria_monocytogenes_J0161_393130                      | Listeria_monocytogenes_1639_v176 | 0.9324 |
| Listeria_monocytogenes_HCC23_552536                      | Listeria_monocytogenes_1639_v176 | 0.9276 |
| Listeria_monocytogenes_FSL_R2-561_393126                 | Listeria_monocytogenes_1639_v176 | 0.9252 |
| Listeria_monocytogenes_FSL_J1-208_393119                 | Listeria_monocytogenes_1639_v176 | 0.9211 |
| Listeria_monocytogenes_FSL_J1-175_393118                 | Listeria_monocytogenes_1639_v176 | 0.935  |
| Listeria_monocytogenes_Finland_1998_393127               | Listeria_monocytogenes_1639_v176 | 0.9475 |
| Listeria_monocytogenes_EGD-e_169963_v1                   | Listeria_monocytogenes_1639_v176 | 0.9348 |
| Listeria_monocytogenes_EGD-e_169963                      | Listeria_monocytogenes_1639_v176 | 0.9348 |
| Listeria_monocytogenes_EGD_1334565                       | Listeria_monocytogenes_1639_v176 | 0.9346 |
| Listeria_monocytogenes_CFSAN002349_1299895               | Listeria_monocytogenes_1639_v176 | 0.9444 |
| Listeria_monocytogenes_ATCC_19117_882095_v1              | Listeria_monocytogenes_1639_v176 | 0.9433 |
| Listeria_monocytogenes_ATCC_19117_882095                 | Listeria_monocytogenes_1639_v176 | 0.9433 |
| Listeria_monocytogenes_6179_1288295                      | Listeria_monocytogenes_1639_v176 | 0.9127 |
| Listeria_monocytogenes_1639_v9                           | Listeria_monocytogenes_1639_v176 | 0.9062 |
| Listeria_monocytogenes_1639_v99                          | Listeria_monocytogenes_1639_v176 | 0.9283 |
| Listeria_monocytogenes_1639_v98                          | Listeria_monocytogenes_1639_v176 | 0.9285 |
| Listeria_monocytogenes_1639_v97                          | Listeria_monocytogenes_1639_v176 | 0.9339 |
| Listeria_monocytogenes_1639_v96                          | Listeria_monocytogenes_1639_v176 | 0.9272 |
| Listeria_monocytogenes_1639_v95                          | Listeria_monocytogenes_1639_v176 | 0.9272 |
| Listeria_monocytogenes_1639_v94                          | Listeria_monocytogenes_1639_v176 | 0.9276 |
| Listeria_monocytogenes_1639_v93                          | Listeria_monocytogenes_1639_v176 | 0.9236 |
| Listeria_monocytogenes_1639_v92                          | Listeria_monocytogenes_1639_v176 | 0.9279 |
| Listeria_monocytogenes_1639_v91                          | Listeria_monocytogenes_1639_v176 | 0.9263 |
| Listeria_monocytogenes_1639_v90                          | Listeria_monocytogenes_1639_v176 | 0.9285 |
| Listeria_monocytogenes_1639_v8                           | Listeria_monocytogenes_1639_v176 | 0.9074 |
| Listeria_monocytogenes_1639_v89                          | Listeria_monocytogenes_1639_v176 | 0.9402 |
| Listeria_monocytogenes_1639_v88                          | Listeria_monocytogenes_1639_v176 | 0.9256 |
| Listeria_monocytogenes_1639_v87                          | Listeria_monocytogenes_1639_v176 | 0.9213 |
| Listeria_monocytogenes_1639_v86                          | Listeria_monocytogenes_1639_v176 | 0.921  |
| Listeria_monocytogenes_1639_v85                          | Listeria_monocytogenes_1639_v176 | 0.9278 |
| Listeria_monocytogenes_1639_v84                          | Listeria_monocytogenes_1639_v176 | 0.9277 |
| Listeria_monocytogenes_1639_v83                          | Listeria_monocytogenes_1639_v176 | 0.9321 |
| Listeria_monocytogenes_1639_v82                          | Listeria_monocytogenes_1639_v176 | 0.9314 |
| Listeria_monocytogenes_1639_v81                          | Listeria_monocytogenes_1639_v176 | 0.9275 |
| Listeria_monocytogenes_1639_v80                          | Listeria_monocytogenes_1639_v176 | 0.9277 |
| Listeria_monocytogenes_1639_v7                           | Listeria_monocytogenes_1639_v176 | 0.9074 |
| Listeria_monocytogenes_1639_v79                          | Listeria_monocytogenes_1639_v176 | 0.9254 |
| Listeria_monocytogenes_1639_v78                          | Listeria_monocytogenes_1639_v176 | 0.9268 |
| Listeria_monocytogenes_1639_v77                          | Listeria_monocytogenes_1639_v176 | 0.9308 |
| Listeria_monocytogenes_1639_v76                          | Listeria_monocytogenes_1639_v176 | 0.9179 |
| Listeria_monocytogenes_1639_v75                          | Listeria_monocytogenes_1639_v176 | 0.9283 |
| Listeria_monocytogenes_1639_v74                          | Listeria_monocytogenes_1639_v176 | 0.9221 |
| Listeria_monocytogenes_1639_v73                          | Listeria_monocytogenes_1639_v176 | 0.921  |
| Listeria_monocytogenes_1639_v72                          | Listeria_monocytogenes_1639_v176 | 0.9309 |
| Listeria_monocytogenes_1639_v71                          | Listeria_monocytogenes_1639_v176 | 0.917  |
| Listeria_monocytogenes_1639_v70                          | Listeria_monocytogenes_1639_v176 | 0.9235 |
| Listeria_monocytogenes_1639_v6                           | Listeria_monocytogenes_1639_v176 | 0.9067 |
| Listeria_monocytogenes_1639_v69                          | Listeria_monocytogenes_1639_v176 | 0.9299 |
| Listeria_monocytogenes_1639_v68                          | Listeria_monocytogenes_1639_v176 | 0.9382 |
| Listeria_monocytogenes_1639_v67                          | Listeria_monocytogenes_1639_v176 | 0.9271 |
| Listeria_monocytogenes_1639_v66                          | Listeria_monocytogenes_1639_v176 | 0.9321 |



[illegible]



[illegible]



[illegible]





[illegible]







|                                             |                                    |        |
|---------------------------------------------|------------------------------------|--------|
| Listeria_monocytogenes_HCC23_552536         | Listeria_monocytogenes_1639_v180   | 0.9338 |
| Listeria_monocytogenes_FSL_R2-561_393126    | Listeria_monocytogenes_1639_v180   | 0.9134 |
| Listeria_monocytogenes_FSL_J1-208_393119    | Listeria_monocytogenes_1639_v180   | 0.9321 |
| Listeria_monocytogenes_FSL_J1-175_393118    | Listeria_monocytogenes_1639_v180   | 0.9226 |
| Listeria_monocytogenes_Finland_1998_393127  | Listeria_monocytogenes_1639_v180   | 0.9293 |
| Listeria_monocytogenes_EGD-e_169963_v1      | Listeria_monocytogenes_1639_v180   | 0.9239 |
| Listeria_monocytogenes_EGD-e_169963         | Listeria_monocytogenes_1639_v180   | 0.9243 |
| Listeria_monocytogenes_EGD_1334565          | Listeria_monocytogenes_1639_v180   | 0.9191 |
| Listeria_monocytogenes_CFSAN002349_1299895  | Listeria_monocytogenes_1639_v180   | 0.934  |
| Listeria_monocytogenes_ATCC_19117_882095_v1 | Listeria_monocytogenes_1639_v180   | 0.9361 |
| Listeria_monocytogenes_ATCC_19117_882095    | Listeria_monocytogenes_1639_v180   | 0.9357 |
| Listeria_monocytogenes_6179_1288295         | Listeria_monocytogenes_1639_v180   | 0.9001 |
| Listeria_monocytogenes_1639_v9              | Listeria_monocytogenes_1639_v180   | 0.8949 |
| Listeria_monocytogenes_1639_v99             | Listeria_monocytogenes_1639_v180   | 0.9165 |
| Listeria_monocytogenes_1639_v98             | Listeria_monocytogenes_1639_v180   | 0.9118 |
| Listeria_monocytogenes_1639_v97             | Listeria_monocytogenes_1639_v180   | 0.9244 |
| Listeria_monocytogenes_1639_v96             | Listeria_monocytogenes_1639_v180   | 0.9154 |
| Listeria_monocytogenes_1639_v95             | Listeria_monocytogenes_1639_v180   | 0.9155 |
| Listeria_monocytogenes_1639_v94             | Listeria_monocytogenes_1639_v180   | 0.9162 |
| Listeria_monocytogenes_1639_v93             | Listeria_monocytogenes_1639_v180   | 0.9055 |
| Listeria_monocytogenes_1639_v92             | Listeria_monocytogenes_1639_v180   | 0.9162 |
| Listeria_monocytogenes_1639_v91             | Listeria_monocytogenes_1639_v180   | 0.9198 |
| Listeria_monocytogenes_1639_v90             | Listeria_monocytogenes_1639_v180   | 0.9118 |
| Listeria_monocytogenes_1639_v8              | Listeria_monocytogenes_1639_v180   | 0.8901 |
| Listeria_monocytogenes_1639_v89             | Listeria_monocytogenes_1639_v180   | 0.9273 |
| Listeria_monocytogenes_1639_v88             | Listeria_monocytogenes_1639_v180   | 0.9101 |
| Listeria_monocytogenes_1639_v87             | Listeria_monocytogenes_1639_v180   | 0.9062 |
| Listeria_monocytogenes_1639_v86             | Listeria_monocytogenes_1639_v180   | 0.9062 |
| Listeria_monocytogenes_1639_v85             | Listeria_monocytogenes_1639_v180   | 0.9219 |
| Listeria_monocytogenes_1639_v84             | Listeria_monocytogenes_1639_v180   | 0.9155 |
| Listeria_monocytogenes_1639_v83             | Listeria_monocytogenes_1639_v180   | 0.9251 |
| Listeria_monocytogenes_1639_v82             | Listeria_monocytogenes_1639_v180   | 0.9244 |
| Listeria_monocytogenes_1639_v81             | Listeria_monocytogenes_1639_v180   | 0.91   |
| Listeria_monocytogenes_1639_v80             | Listeria_monocytogenes_1639_v180   | 0.9128 |
| Listeria_monocytogenes_1639_v7              | Listeria_monocytogenes_1639_v180   | 0.8901 |
| Listeria_monocytogenes_1639_v79             | Listeria_monocytogenes_1639_v180   | 0.9083 |
| Listeria_monocytogenes_1639_v78             | Listeria_monocytogenes_1639_v180   | 0.9093 |
| Listeria_monocytogenes_1639_v77             | Listeria_monocytogenes_1639_v180   | 0.9116 |
| Listeria_monocytogenes_1639_v76             | Listeria_monocytogenes_1639_v180   | 0.9051 |
| Listeria_monocytogenes_1639_v75             | Listeria_monocytogenes_1639_v180   | 0.9342 |
| Listeria_monocytogenes_1639_v74             | Listeria_monocytogenes_1639_v180   | 0.9078 |
| Listeria_monocytogenes_1639_v73             | Listeria_monocytogenes_1639_v180   | 0.909  |
| Listeria_monocytogenes_1639_v72             | Listeria_monocytogenes_1639_v180   | 0.9235 |
| Listeria_monocytogenes_1639_v71             | Listeria_monocytogenes_1639_v180   | 0.8972 |
| Listeria_monocytogenes_1639_v70             | Listeria_monocytogenes_1639_v180   | 0.9114 |
| Listeria_monocytogenes_1639_v6              | Listeria_monocytogenes_1639_v180   | 0.8898 |
| Listeria_monocytogenes_1639_v69             | Listeria_monocytogenes_1639_v180   | 0.9237 |
| Listeria_monocytogenes_1639_v68             | Listeria_monocytogenes_1639_v180   | 0.9202 |
| Listeria_monocytogenes_1639_v67             | Listeria_monocytogenes_1639_v180   | 0.9149 |
| Listeria_monocytogenes_1639_v66             | Listeria_monocytogenes_1639_v180   | 0.9163 |
| Listeria_monocytogenes_1639_v65             | Listeria_monocytogenes_1639_v180   | 0.9038 |
| Listeria_monocytogenes_1639_v64             | Listeria_monocytogenes_1639_v180   | 0.9136 |
| Listeria_monocytogenes_1639_v63             | Listeria_monocytogenes_1639_v180   | 0.9083 |
| Listeria_monocytogenes_1639_v62             | Listeria_monocytogenes_1639_v180   | 0.9059 |
| Listeria_monocytogenes_1639_v61             | Listeria_monocytogenes_1639_v180   | 0.9038 |
| Listeria_monocytogenes_1639_v60             | Listeria_monocytogenes_1639_v180   | 0.9153 |
| Listeria_monocytogenes_1639_v5              | Listeria_monocytogenes_1639_v180   | 0.8757 |
| Listeria_monocytogenes_1639_v59             | Listeria_monocytogenes_1639_v180   | 0.9254 |
| Listeria_monocytogenes_1639_v58             | Listeria_monocytogenes_1639_v180   | 0.9251 |
| Listeria_monocytogenes_1639_v57             | Listeria_monocytogenes_1639_v180   | 0.9121 |
| Listeria_monocytogenes_1639_v56             | Listeria_monocytogenes_1639_v180   | 0.9258 |
| Listeria_monocytogenes_1639_v55             | Listeria_monocytogenes_1639_v180   | 0.9087 |
| Listeria_monocytogenes_1639_v54             | Listeria_monocytogenes_1639_v180   | 0.9127 |
| Listeria_monocytogenes_1639_v53             | Listeria_monocytogenes_1639_v180   | 0.9168 |
| Listeria_monocytogenes_1639_v52             | Listeria_monocytogenes_1639_v180   | 0.9219 |
| Listeria_monocytogenes_1639_v51             | Listeria_monocytogenes_1639_v180   | 0.9206 |
| Listeria_monocytogenes_1639_v50             | Listeria_monocytogenes_1639_v180   | 0.9004 |
| Listeria_monocytogenes_1639_v4              | Listeria_monocytogenes_1639_v180   | 0.8877 |
| Listeria_monocytogenes_1639_v49             | Listeria_monocytogenes_1639_v180   | 0.9234 |
| Listeria_monocytogenes_1639_v48             | Listeria_monocytogenes_1639_v180   | 0.9093 |
| Listeria_monocytogenes_1639_v47             | Listeria_monocytogenes_1639_v180   | 0.9012 |
| Listeria_monocytogenes_1639_v46             | Listeria_monocytogenes_1639_v180   | 0.9191 |
| Listeria_monocytogenes_1639_v45             | Listeria_monocytogenes_1639_v180   | 0.8925 |
| Listeria_monocytogenes_1639_v44             | Listeria_monocytogenes_1639_v180   | 0.9015 |
| Listeria_monocytogenes_1639_v43             | Listeria_monocytogenes_1639_v180</ |        |





|                                             |                                  |        |
|---------------------------------------------|----------------------------------|--------|
| Listeria_monocytogenes_M7_1030009           | Listeria_monocytogenes_1639_v181 | 0.9338 |
| Listeria_monocytogenes_LO28_393132          | Listeria_monocytogenes_1639_v181 | 0.9138 |
| Listeria_monocytogenes_L99_563174           | Listeria_monocytogenes_1639_v181 | 0.9342 |
| Listeria_monocytogenes_L312_882094          | Listeria_monocytogenes_1639_v181 | 0.9408 |
| Listeria_monocytogenes_J1816_930781         | Listeria_monocytogenes_1639_v181 | 0.9153 |
| Listeria_monocytogenes_J1-220_930782        | Listeria_monocytogenes_1639_v181 | 0.9164 |
| Listeria_monocytogenes_J0161_393130         | Listeria_monocytogenes_1639_v181 | 0.9134 |
| Listeria_monocytogenes_HCC23_552536         | Listeria_monocytogenes_1639_v181 | 0.9338 |
| Listeria_monocytogenes_FSL_R2-561_393126    | Listeria_monocytogenes_1639_v181 | 0.9134 |
| Listeria_monocytogenes_FSL_J1-208_393119    | Listeria_monocytogenes_1639_v181 | 0.9321 |
| Listeria_monocytogenes_FSL_J1-175_393118    | Listeria_monocytogenes_1639_v181 | 0.9226 |
| Listeria_monocytogenes_Finland_1998_393127  | Listeria_monocytogenes_1639_v181 | 0.9293 |
| Listeria_monocytogenes_EGD-e_169963_v1      | Listeria_monocytogenes_1639_v181 | 0.9239 |
| Listeria_monocytogenes_EGD-e_169963         | Listeria_monocytogenes_1639_v181 | 0.9243 |
| Listeria_monocytogenes_EGD_1334565          | Listeria_monocytogenes_1639_v181 | 0.9191 |
| Listeria_monocytogenes_CFSAN002349_1299895  | Listeria_monocytogenes_1639_v181 | 0.9341 |
| Listeria_monocytogenes_ATCC_19117_882095_v1 | Listeria_monocytogenes_1639_v181 | 0.9361 |
| Listeria_monocytogenes_ATCC_19117_882095    | Listeria_monocytogenes_1639_v181 | 0.9357 |
| Listeria_monocytogenes_6179_1288295         | Listeria_monocytogenes_1639_v181 | 0.9001 |
| Listeria_monocytogenes_1639_v9              | Listeria_monocytogenes_1639_v181 | 0.8949 |
| Listeria_monocytogenes_1639_v99             | Listeria_monocytogenes_1639_v181 | 0.9165 |
| Listeria_monocytogenes_1639_v98             | Listeria_monocytogenes_1639_v181 | 0.9118 |
| Listeria_monocytogenes_1639_v97             | Listeria_monocytogenes_1639_v181 | 0.9245 |
| Listeria_monocytogenes_1639_v96             | Listeria_monocytogenes_1639_v181 | 0.9154 |
| Listeria_monocytogenes_1639_v95             | Listeria_monocytogenes_1639_v181 | 0.9155 |
| Listeria_monocytogenes_1639_v94             | Listeria_monocytogenes_1639_v181 | 0.9162 |
| Listeria_monocytogenes_1639_v93             | Listeria_monocytogenes_1639_v181 | 0.9055 |
| Listeria_monocytogenes_1639_v92             | Listeria_monocytogenes_1639_v181 | 0.9162 |
| Listeria_monocytogenes_1639_v91             | Listeria_monocytogenes_1639_v181 | 0.9198 |
| Listeria_monocytogenes_1639_v90             | Listeria_monocytogenes_1639_v181 | 0.9118 |
| Listeria_monocytogenes_1639_v8              | Listeria_monocytogenes_1639_v181 | 0.8901 |
| Listeria_monocytogenes_1639_v89             | Listeria_monocytogenes_1639_v181 | 0.9273 |
| Listeria_monocytogenes_1639_v88             | Listeria_monocytogenes_1639_v181 | 0.9101 |
| Listeria_monocytogenes_1639_v87             | Listeria_monocytogenes_1639_v181 | 0.9062 |
| Listeria_monocytogenes_1639_v86             | Listeria_monocytogenes_1639_v181 | 0.9062 |
| Listeria_monocytogenes_1639_v85             | Listeria_monocytogenes_1639_v181 | 0.9219 |
| Listeria_monocytogenes_1639_v84             | Listeria_monocytogenes_1639_v181 | 0.9155 |
| Listeria_monocytogenes_1639_v83             | Listeria_monocytogenes_1639_v181 | 0.9251 |
| Listeria_monocytogenes_1639_v82             | Listeria_monocytogenes_1639_v181 | 0.9244 |
| Listeria_monocytogenes_1639_v81             | Listeria_monocytogenes_1639_v181 | 0.91   |
| Listeria_monocytogenes_1639_v80             | Listeria_monocytogenes_1639_v181 | 0.9128 |
| Listeria_monocytogenes_1639_v7              | Listeria_monocytogenes_1639_v181 | 0.8901 |
| Listeria_monocytogenes_1639_v79             | Listeria_monocytogenes_1639_v181 | 0.9083 |
| Listeria_monocytogenes_1639_v78             | Listeria_monocytogenes_1639_v181 | 0.9093 |
| Listeria_monocytogenes_1639_v77             | Listeria_monocytogenes_1639_v181 | 0.9116 |
| Listeria_monocytogenes_1639_v76             | Listeria_monocytogenes_1639_v181 | 0.9051 |
| Listeria_monocytogenes_1639_v75             | Listeria_monocytogenes_1639_v181 | 0.9342 |
| Listeria_monocytogenes_1639_v74             | Listeria_monocytogenes_1639_v181 | 0.9078 |
| Listeria_monocytogenes_1639_v73             | Listeria_monocytogenes_1639_v181 | 0.909  |
| Listeria_monocytogenes_1639_v72             | Listeria_monocytogenes_1639_v181 | 0.9235 |
| Listeria_monocytogenes_1639_v71             | Listeria_monocytogenes_1639_v181 | 0.8972 |
| Listeria_monocytogenes_1639_v70             | Listeria_monocytogenes_1639_v181 | 0.9114 |
| Listeria_monocytogenes_1639_v6              | Listeria_monocytogenes_1639_v181 | 0.8898 |
| Listeria_monocytogenes_1639_v69             | Listeria_monocytogenes_1639_v181 | 0.9237 |
| Listeria_monocytogenes_1639_v68             | Listeria_monocytogenes_1639_v181 | 0.9202 |
| Listeria_monocytogenes_1639_v67             | Listeria_monocytogenes_1639_v181 | 0.9149 |
| Listeria_monocytogenes_1639_v66             | Listeria_monocytogenes_1639_v181 | 0.9163 |
| Listeria_monocytogenes_1639_v65             | Listeria_monocytogenes_1639_v181 | 0.9038 |
| Listeria_monocytogenes_1639_v64             | Listeria_monocytogenes_1639_v181 | 0.9136 |
| Listeria_monocytogenes_1639_v63             | Listeria_monocytogenes_1639_v181 | 0.9083 |
| Listeria_monocytogenes_1639_v62             | Listeria_monocytogenes_1639_v181 | 0.9059 |
| Listeria_monocytogenes_1639_v61             | Listeria_monocytogenes_1639_v181 | 0.9038 |
| Listeria_monocytogenes_1639_v60             | Listeria_monocytogenes_1639_v181 | 0.9153 |
| Listeria_monocytogenes_1639_v5              | Listeria_monocytogenes_1639_v181 | 0.8757 |
| Listeria_monocytogenes_1639_v59             | Listeria_monocytogenes_1639_v181 | 0.9254 |
| Listeria_monocytogenes_1639_v58             | Listeria_monocytogenes_1639_v181 | 0.9251 |
| Listeria_monocytogenes_1639_v57             | Listeria_monocytogenes_1639_v181 | 0.9121 |
| Listeria_monocytogenes_1639_v56             | Listeria_monocytogenes_1639_v181 | 0.9258 |
| Listeria_monocytogenes_1639_v55             | Listeria_monocytogenes_1639_v181 | 0.9087 |
| Listeria_monocytogenes_1639_v54             | Listeria_monocytogenes_1639_v181 | 0.9127 |
| Listeria_monocytogenes_1639_v53             | Listeria_monocytogenes_1639_v181 | 0.9168 |
| Listeria_monocytogenes_1639_v52             | Listeria_monocytogenes_1639_v181 | 0.9219 |
| Listeria_monocytogenes_1639_v51             | Listeria_monocytogenes_1639_v181 | 0.9206 |
| Listeria_monocytogenes_1639_v50             | Listeria_monocytogenes_1639_v181 | 0.9004 |
| Listeria_monocytogenes_1639                 |                                  |        |













|                                                          |                                  |        |
|----------------------------------------------------------|----------------------------------|--------|
| Listeria_monocytogenes_serotype_1_2a_str_10-0934_1196170 | Listeria_monocytogenes_1639_v184 | 0.9856 |
| Listeria_monocytogenes_serotype_1_2a_str_10-0933_1196169 | Listeria_monocytogenes_1639_v184 | 0.9856 |
| Listeria_monocytogenes_serotype_1_2a_str_10-0815_1196188 | Listeria_monocytogenes_1639_v184 | 0.9446 |
| Listeria_monocytogenes_serotype_1_2a_str_10-0814_1196187 | Listeria_monocytogenes_1639_v184 | 0.9493 |
| Listeria_monocytogenes_serotype_1_2a_str_10-0813_1196166 | Listeria_monocytogenes_1639_v184 | 0.977  |
| Listeria_monocytogenes_serotype_1_2a_str_10-0812_1196165 | Listeria_monocytogenes_1639_v184 | 0.977  |
| Listeria_monocytogenes_serotype_1_2a_str_08-7669_1196186 | Listeria_monocytogenes_1639_v184 | 0.9594 |
| Listeria_monocytogenes_serotype_1_2a_str_08-7374_1196185 | Listeria_monocytogenes_1639_v184 | 0.9496 |
| Listeria_monocytogenes_serotype_1_2a_str_08-6997_1196184 | Listeria_monocytogenes_1639_v184 | 0.9446 |
| Listeria_monocytogenes_serotype_1_2a_str_08-6569_1196183 | Listeria_monocytogenes_1639_v184 | 0.9446 |
| Listeria_monocytogenes_serotype_1_2a_str_08-6056_1196182 | Listeria_monocytogenes_1639_v184 | 0.9446 |
| Listeria_monocytogenes_serotype_1_2a_str_04-5457_1196181 | Listeria_monocytogenes_1639_v184 | 0.9496 |
| Listeria_monocytogenes_serotype_1_2a_str_02-5993_1196180 | Listeria_monocytogenes_1639_v184 | 0.9493 |
| Listeria_monocytogenes_R479a_1437838                     | Listeria_monocytogenes_1639_v184 | 0.9482 |
| Listeria_monocytogenes_N53-1_1234142                     | Listeria_monocytogenes_1639_v184 | 0.9175 |
| Listeria_monocytogenes_M7_1030009                        | Listeria_monocytogenes_1639_v184 | 0.9085 |
| Listeria_monocytogenes_LO28_393132                       | Listeria_monocytogenes_1639_v184 | 0.9528 |
| Listeria_monocytogenes_L99_563174                        | Listeria_monocytogenes_1639_v184 | 0.9092 |
| Listeria_monocytogenes_L312_882094                       | Listeria_monocytogenes_1639_v184 | 0.9545 |
| Listeria_monocytogenes_J1816_930781                      | Listeria_monocytogenes_1639_v184 | 0.9338 |
| Listeria_monocytogenes_J1-220_930782                     | Listeria_monocytogenes_1639_v184 | 0.9284 |
| Listeria_monocytogenes_J0161_393130                      | Listeria_monocytogenes_1639_v184 | 0.9536 |
| Listeria_monocytogenes_HCC23_552536                      | Listeria_monocytogenes_1639_v184 | 0.9089 |
| Listeria_monocytogenes_FSL_R2-561_393126                 | Listeria_monocytogenes_1639_v184 | 0.9528 |
| Listeria_monocytogenes_FSL_J1-208_393119                 | Listeria_monocytogenes_1639_v184 | 0.919  |
| Listeria_monocytogenes_FSL_J1-175_393118                 | Listeria_monocytogenes_1639_v184 | 0.9495 |
| Listeria_monocytogenes_Finland_1998_393127               | Listeria_monocytogenes_1639_v184 | 0.9735 |
| Listeria_monocytogenes_EGD-e_169963_v1                   | Listeria_monocytogenes_1639_v184 | 0.9627 |
| Listeria_monocytogenes_EGD-e_169963                      | Listeria_monocytogenes_1639_v184 | 0.9627 |
| Listeria_monocytogenes_EGD_1334565                       | Listeria_monocytogenes_1639_v184 | 0.9853 |
| Listeria_monocytogenes_CFSAN002349_1299895               | Listeria_monocytogenes_1639_v184 | 0.9531 |
| Listeria_monocytogenes_ATCC_19117_882095_v1              | Listeria_monocytogenes_1639_v184 | 0.9485 |
| Listeria_monocytogenes_ATCC_19117_882095                 | Listeria_monocytogenes_1639_v184 | 0.9485 |
| Listeria_monocytogenes_6179_1288295                      | Listeria_monocytogenes_1639_v184 | 0.9392 |
| Listeria_monocytogenes_1639_v9                           | Listeria_monocytogenes_1639_v184 | 0.9203 |
| Listeria_monocytogenes_1639_v99                          | Listeria_monocytogenes_1639_v184 | 0.9346 |
| Listeria_monocytogenes_1639_v98                          | Listeria_monocytogenes_1639_v184 | 0.9512 |
| Listeria_monocytogenes_1639_v97                          | Listeria_monocytogenes_1639_v184 | 0.9414 |
| Listeria_monocytogenes_1639_v96                          | Listeria_monocytogenes_1639_v184 | 0.9335 |
| Listeria_monocytogenes_1639_v95                          | Listeria_monocytogenes_1639_v184 | 0.9335 |
| Listeria_monocytogenes_1639_v94                          | Listeria_monocytogenes_1639_v184 | 0.9339 |
| Listeria_monocytogenes_1639_v93                          | Listeria_monocytogenes_1639_v184 | 0.9492 |
| Listeria_monocytogenes_1639_v92                          | Listeria_monocytogenes_1639_v184 | 0.9342 |
| Listeria_monocytogenes_1639_v91                          | Listeria_monocytogenes_1639_v184 | 0.9292 |
| Listeria_monocytogenes_1639_v90                          | Listeria_monocytogenes_1639_v184 | 0.9512 |
| Listeria_monocytogenes_1639_v8                           | Listeria_monocytogenes_1639_v184 | 0.9379 |
| Listeria_monocytogenes_1639_v89                          | Listeria_monocytogenes_1639_v184 | 0.945  |
| Listeria_monocytogenes_1639_v88                          | Listeria_monocytogenes_1639_v184 | 0.9652 |
| Listeria_monocytogenes_1639_v87                          | Listeria_monocytogenes_1639_v184 | 0.9722 |
| Listeria_monocytogenes_1639_v86                          | Listeria_monocytogenes_1639_v184 | 0.9722 |
| Listeria_monocytogenes_1639_v85                          | Listeria_monocytogenes_1639_v184 | 0.9299 |
| Listeria_monocytogenes_1639_v84                          | Listeria_monocytogenes_1639_v184 | 0.9575 |
| Listeria_monocytogenes_1639_v83                          | Listeria_monocytogenes_1639_v184 | 0.9373 |
| Listeria_monocytogenes_1639_v82                          | Listeria_monocytogenes_1639_v184 | 0.937  |
| Listeria_monocytogenes_1639_v81                          | Listeria_monocytogenes_1639_v184 | 0.9534 |
| Listeria_monocytogenes_1639_v80                          | Listeria_monocytogenes_1639_v184 | 0.9402 |
| Listeria_monocytogenes_1639_v7                           | Listeria_monocytogenes_1639_v184 | 0.9379 |
| Listeria_monocytogenes_1639_v79                          | Listeria_monocytogenes_1639_v184 | 0.9512 |
| Listeria_monocytogenes_1639_v78                          | Listeria_monocytogenes_1639_v184 | 0.9526 |
| Listeria_monocytogenes_1639_v77                          | Listeria_monocytogenes_1639_v184 | 0.9574 |
| Listeria_monocytogenes_1639_v76                          | Listeria_monocytogenes_1639_v184 | 0.9473 |
| Listeria_monocytogenes_1639_v75                          | Listeria_monocytogenes_1639_v184 | 0.9092 |
| Listeria_monocytogenes_1639_v74                          | Listeria_monocytogenes_1639_v184 | 0.9715 |
| Listeria_monocytogenes_1639_v73                          | Listeria_monocytogenes_1639_v184 | 0.9478 |
| Listeria_monocytogenes_1639_v72                          | Listeria_monocytogenes_1639_v184 | 0.9361 |
| Listeria_monocytogenes_1639_v71                          | Listeria_monocytogenes_1639_v184 | 0.9388 |
| Listeria_monocytogenes_1639_v70                          | Listeria_monocytogenes_1639_v184 | 0.9506 |
| Listeria_monocytogenes_1639_v6                           | Listeria_monocytogenes_1639_v184 | 0.9372 |
| Listeria_monocytogenes_1639_v69                          | Listeria_monocytogenes_1639_v184 | 0.932  |
| Listeria_monocytogenes_1639_v68                          | Listeria_monocytogenes_1639_v184 | 0.9568 |
| Listeria_monocytogenes_1639_v67                          | Listeria_monocytogenes_1639_v184 | 0.9411 |
| Listeria_monocytogenes_1639_v66                          | Listeria_monocytogenes_1639_v184 | 0.9619 |
| Listeria_monocytogenes_1639_v65                          | Listeria_monocytogenes_1639_v184 | 0.9521 |
| Listeria_monocytogenes_1639_v64                          | Listeria_monocytogenes_1639_v184 | 0.9542 |
| Listeria_monocytogenes_1639_v63                          | Listeria_monocytogenes_1639_v184 | 0.9362 |
| Listeria_monocytogenes_1639_v62                          | Listeria_monocytogenes_1639_v184 | 0.949  |
| Listeria_monocytogenes_1639_v61                          | Listeria_monocytogenes_1639_v184 | 0.9521 |
| Listeria_monocytogenes_1639_v60                          | Listeria_monocytogenes_1639_v184 | 0.956  |
| Listeria_monocytogenes_1639_v5                           | Listeria_monocytogenes_1639_v184 | 0.9007 |
| Listeria_monocytogenes_1639_v59                          | Listeria_monocytogenes_1639_v184 | 0.938  |
| Listeria_monocytogenes_1639_v58                          | Listeria_monocytogenes_1639_v184 | 0.9369 |
| Listeria_monocytogenes_1639_v57                          | Listeria_monocytogenes_1639_v184 | 0.93   |
| Listeria_monocytogenes_1639_v56                          | Listeria_monocytogenes_1639_v184 | 0.938  |
| Listeria_monocytogenes_1639_v55                          | Listeria_monocytogenes_1639_v184 | 0.9265 |
| Listeria_monocytogenes_1639_v54                          | Listeria_monocytogenes_1639_v184 | 0.933  |
| Listeria_monocytogenes_1639_v53                          | Listeria_monocytogenes_1639_v184 | 0.9549 |
| Listeria_monocytogenes_1639_v52                          | Listeria_monocytogenes_1639_v184 | 0.9348 |
| Listeria_monocytogenes_1639_v51                          | Listeria_monocytogenes_1639_v184 | 0.9327 |
| Listeria_monocytogenes_1639_v50                          | Listeria_monocytogenes_1639_v184 | 0.9481 |
| Listeria_monocytogenes_1639_v4                           | Listeria_monocytogenes_1639_v184 | 0.9136 |
| Listeria_monocytogenes_1639_v49                          | Listeria_monocytogenes_1639_v184 | 0.9313 |

|                                                          |                                  |        |
|----------------------------------------------------------|----------------------------------|--------|
| Listeria_monocytogenes_1639_v48                          | Listeria_monocytogenes_1639_v184 | 0.9485 |
| Listeria_monocytogenes_1639_v47                          | Listeria_monocytogenes_1639_v184 | 0.9493 |
| Listeria_monocytogenes_1639_v46                          | Listeria_monocytogenes_1639_v184 | 0.9561 |
| Listeria_monocytogenes_1639_v45                          | Listeria_monocytogenes_1639_v184 | 0.9393 |
| Listeria_monocytogenes_1639_v44                          | Listeria_monocytogenes_1639_v184 | 0.9496 |
| Listeria_monocytogenes_1639_v43                          | Listeria_monocytogenes_1639_v184 | 0.9496 |
| Listeria_monocytogenes_1639_v42                          | Listeria_monocytogenes_1639_v184 | 0.9409 |
| Listeria_monocytogenes_1639_v41                          | Listeria_monocytogenes_1639_v184 | 0.9315 |
| Listeria_monocytogenes_1639_v40                          | Listeria_monocytogenes_1639_v184 | 0.9532 |
| Listeria_monocytogenes_1639_v3                           | Listeria_monocytogenes_1639_v184 | 0.914  |
| Listeria_monocytogenes_1639_v39                          | Listeria_monocytogenes_1639_v184 | 0.9365 |
| Listeria_monocytogenes_1639_v38                          | Listeria_monocytogenes_1639_v184 | 0.9503 |
| Listeria_monocytogenes_1639_v37                          | Listeria_monocytogenes_1639_v184 | 0.9468 |
| Listeria_monocytogenes_1639_v36                          | Listeria_monocytogenes_1639_v184 | 0.9488 |
| Listeria_monocytogenes_1639_v35                          | Listeria_monocytogenes_1639_v184 | 0.9539 |
| Listeria_monocytogenes_1639_v34                          | Listeria_monocytogenes_1639_v184 | 0.9481 |
| Listeria_monocytogenes_1639_v33                          | Listeria_monocytogenes_1639_v184 | 0.9351 |
| Listeria_monocytogenes_1639_v32                          | Listeria_monocytogenes_1639_v184 | 0.9453 |
| Listeria_monocytogenes_1639_v31                          | Listeria_monocytogenes_1639_v184 | 0.9484 |
| Listeria_monocytogenes_1639_v30                          | Listeria_monocytogenes_1639_v184 | 0.9373 |
| Listeria_monocytogenes_1639_v2                           | Listeria_monocytogenes_1639_v184 | 0.9028 |
| Listeria_monocytogenes_1639_v29                          | Listeria_monocytogenes_1639_v184 | 0.9396 |
| Listeria_monocytogenes_1639_v28                          | Listeria_monocytogenes_1639_v184 | 0.9442 |
| Listeria_monocytogenes_1639_v27                          | Listeria_monocytogenes_1639_v184 | 0.9347 |
| Listeria_monocytogenes_1639_v26                          | Listeria_monocytogenes_1639_v184 | 0.9344 |
| Listeria_monocytogenes_1639_v25                          | Listeria_monocytogenes_1639_v184 | 0.934  |
| Listeria_monocytogenes_1639_v24                          | Listeria_monocytogenes_1639_v184 | 0.9284 |
| Listeria_monocytogenes_1639_v23                          | Listeria_monocytogenes_1639_v184 | 0.9284 |
| Listeria_monocytogenes_1639_v22                          | Listeria_monocytogenes_1639_v184 | 0.9365 |
| Listeria_monocytogenes_1639_v21                          | Listeria_monocytogenes_1639_v184 | 0.9284 |
| Listeria_monocytogenes_1639_v20                          | Listeria_monocytogenes_1639_v184 | 0.9321 |
| Listeria_monocytogenes_1639_v1                           | Listeria_monocytogenes_1639_v184 | 0.9323 |
| Listeria_monocytogenes_1639_v19                          | Listeria_monocytogenes_1639_v184 | 0.9317 |
| Listeria_monocytogenes_1639_v198                         | Listeria_monocytogenes_1639_v184 | 0.9196 |
| Listeria_monocytogenes_1639_v197                         | Listeria_monocytogenes_1639_v184 | 0.9491 |
| Listeria_monocytogenes_1639_v196                         | Listeria_monocytogenes_1639_v184 | 0.969  |
| Listeria_monocytogenes_1639_v195                         | Listeria_monocytogenes_1639_v184 | 0.9575 |
| Listeria_monocytogenes_1639_v194                         | Listeria_monocytogenes_1639_v184 | 0.9556 |
| Listeria_monocytogenes_1639_v193                         | Listeria_monocytogenes_1639_v184 | 0.956  |
| Listeria_monocytogenes_1639_v192                         | Listeria_monocytogenes_1639_v184 | 0.9115 |
| Listeria_monocytogenes_1639_v191                         | Listeria_monocytogenes_1639_v184 | 0.982  |
| Listeria_monocytogenes_1639_v190                         | Listeria_monocytogenes_1639_v184 | 0.9988 |
| Listeria_monocytogenes_1639_v18                          | Listeria_monocytogenes_1639_v184 | 0.9241 |
| Listeria_monocytogenes_1639_v189                         | Listeria_monocytogenes_1639_v184 | 0.998  |
| Listeria_monocytogenes_1639_v188                         | Listeria_monocytogenes_1639_v184 | 0.9773 |
| Listeria_monocytogenes_1639_v187                         | Listeria_monocytogenes_1639_v184 | 0.9988 |
| Listeria_monocytogenes_1639_v186                         | Listeria_monocytogenes_1639_v184 | 0.9988 |
| Listeria_monocytogenes_1639_v185                         | Listeria_monocytogenes_1639_v184 | 0.9988 |
| Listeria_monocytogenes_1639_v184                         | Listeria_monocytogenes_1639_v184 | 0.0669 |
| Listeria_welshimeri_1643                                 | Listeria_monocytogenes_1639_v185 | 0.8834 |
| Listeria_welshimeri_serovar_6b_str_SLCC5334_386043       | Listeria_monocytogenes_1639_v185 | 0.883  |
| Listeria_seeligeri_serovar_1_2b_str_SLCC3954_683837      | Listeria_monocytogenes_1639_v185 | 0.8958 |
| Listeria_seeligeri_FSL_S4-171_702452                     | Listeria_monocytogenes_1639_v185 | 0.8269 |
| Listeria_seeligeri_FSL_N1-067_702453                     | Listeria_monocytogenes_1639_v185 | 0.8363 |
| Listeria_seeligeri_1640_v1                               | Listeria_monocytogenes_1639_v185 | 0.8941 |
| Listeria_seeligeri_1640                                  | Listeria_monocytogenes_1639_v185 | 0.884  |
| Listeria_monocytogenes_WSLC1042_1457188                  | Listeria_monocytogenes_1639_v185 | 0.9414 |
| Listeria_monocytogenes_WSLC1001_1457187                  | Listeria_monocytogenes_1639_v185 | 0.9804 |
| Listeria_monocytogenes_SLCC7179_879090                   | Listeria_monocytogenes_1639_v185 | 0.9702 |
| Listeria_monocytogenes_SLCC5850_882096                   | Listeria_monocytogenes_1639_v185 | 0.9854 |
| Listeria_monocytogenes_SLCC2755_932919                   | Listeria_monocytogenes_1639_v185 | 0.9457 |
| Listeria_monocytogenes_SLCC2540_879089                   | Listeria_monocytogenes_1639_v185 | 0.9451 |
| Listeria_monocytogenes_SLCC2479_882020                   | Listeria_monocytogenes_1639_v185 | 0.955  |
| Listeria_monocytogenes_SLCC2378_879088                   | Listeria_monocytogenes_1639_v185 | 0.9425 |
| Listeria_monocytogenes_SLCC2376_882097                   | Listeria_monocytogenes_1639_v185 | 0.956  |
| Listeria_monocytogenes_SLCC2372_932920                   | Listeria_monocytogenes_1639_v185 | 0.9474 |
| Listeria_monocytogenes_serotype_4b_str_LL195_1230340     | Listeria_monocytogenes_1639_v185 | 0.9487 |
| Listeria_monocytogenes_serotype_4b_str_LIS0087_1134669   | Listeria_monocytogenes_1639_v185 | 0.9619 |
| Listeria_monocytogenes_serotype_4b_str_F2365_265669      | Listeria_monocytogenes_1639_v185 | 0.9487 |
| Listeria_monocytogenes_serotype_4b_str_CLIP_80459_568819 | Listeria_monocytogenes_1639_v185 | 0.9553 |
| Listeria_monocytogenes_serotype_4b_str_81-0861_1196161   | Listeria_monocytogenes_1639_v185 | 0.9313 |
| Listeria_monocytogenes_serotype_4b_str_81-0592_1196160   | Listeria_monocytogenes_1639_v185 | 0.9324 |
| Listeria_monocytogenes_serotype_4b_str_81-0558_1196159   | Listeria_monocytogenes_1639_v185 | 0.9332 |
| Listeria_monocytogenes_serotype_4b_str_10-0809_1196162   | Listeria_monocytogenes_1639_v185 | 0.9328 |
| Listeria_monocytogenes_serotype_4b_str_02-6680_1196175   | Listeria_monocytogenes_1639_v185 | 0.9542 |
| Listeria_monocytogenes_serotype_4b_str_02-6679_1196174   | Listeria_monocytogenes_1639_v185 | 0.9542 |
| Listeria_monocytogenes_serotype_4b_str_02-1792_1196173   | Listeria_monocytogenes_1639_v185 | 0.9328 |
| Listeria_monocytogenes_serotype_4b_str_02-1289_1196172   | Listeria_monocytogenes_1639_v185 | 0.9328 |
| Listeria_monocytogenes_serotype_4b_str_02-1103_1196171   | Listeria_monocytogenes_1639_v185 | 0.9328 |
| Listeria_monocytogenes_serotype_3c_str_10-5027_1196195   | Listeria_monocytogenes_1639_v185 | 0.9543 |
| Listeria_monocytogenes_serotype_1_2c_str_10-5026_1196194 | Listeria_monocytogenes_1639_v185 | 0.955  |
| Listeria_monocytogenes_serotype_1_2c_str_10-5025_1196193 | Listeria_monocytogenes_1639_v185 | 0.955  |
| Listeria_monocytogenes_serotype_1_2b_str_10-0811_1196164 | Listeria_monocytogenes_1639_v185 | 0.9362 |
| Listeria_monocytogenes_serotype_1_2b_str_10-0810_1196163 | Listeria_monocytogenes_1639_v185 | 0.9362 |
| Listeria_monocytogenes_serotype_1_2a_str_99-6370_1196179 | Listeria_monocytogenes_1639_v185 | 0.944  |
| Listeria_monocytogenes_serotype_1_2a_str_98-2035_1196178 | Listeria_monocytogenes_1639_v185 | 0.944  |
| Listeria_monocytogenes_serotype_1_2a_str_95-0093_1196177 | Listeria_monocytogenes_1639_v185 | 0.95   |
| Listeria_monocytogenes_serotype_1_2a_str_88-0478_1196176 | Listeria_monocytogenes_1639_v185 | 0.9489 |
| Listeria_monocytogenes_serotype_1_2a_str_10-5024_1196192 | Listeria_monocytogenes_1639_v185 | 0.95   |
| Listeria_monocytogenes_serotype_1_2a_str_10-4758_1196168 | Listeria_monocytogenes_1639_v185 | 0.9642 |
| Listeria_monocytogenes_serotype_1_2a_str_10-4754_1196167 | Listeria_monocytogenes_1639_v185 | 0.9646 |

|                                                          |                                  |        |
|----------------------------------------------------------|----------------------------------|--------|
| Listeria_monocytogenes_serotype_1_2a_str_10-1321_1196191 | Listeria_monocytogenes_1639_v185 | 0.95   |
| Listeria_monocytogenes_serotype_1_2a_str_10-1047_1196190 | Listeria_monocytogenes_1639_v185 | 0.9508 |
| Listeria_monocytogenes_serotype_1_2a_str_10-1046_1196189 | Listeria_monocytogenes_1639_v185 | 0.9508 |
| Listeria_monocytogenes_serotype_1_2a_str_10-0934_1196170 | Listeria_monocytogenes_1639_v185 | 0.9863 |
| Listeria_monocytogenes_serotype_1_2a_str_10-0933_1196169 | Listeria_monocytogenes_1639_v185 | 0.9863 |
| Listeria_monocytogenes_serotype_1_2a_str_10-0815_1196188 | Listeria_monocytogenes_1639_v185 | 0.9454 |
| Listeria_monocytogenes_serotype_1_2a_str_10-0814_1196187 | Listeria_monocytogenes_1639_v185 | 0.95   |
| Listeria_monocytogenes_serotype_1_2a_str_10-0813_1196166 | Listeria_monocytogenes_1639_v185 | 0.9778 |
| Listeria_monocytogenes_serotype_1_2a_str_10-0812_1196165 | Listeria_monocytogenes_1639_v185 | 0.9778 |
| Listeria_monocytogenes_serotype_1_2a_str_08-7669_1196186 | Listeria_monocytogenes_1639_v185 | 0.9602 |
| Listeria_monocytogenes_serotype_1_2a_str_08-7374_1196185 | Listeria_monocytogenes_1639_v185 | 0.95   |
| Listeria_monocytogenes_serotype_1_2a_str_08-6997_1196184 | Listeria_monocytogenes_1639_v185 | 0.9454 |
| Listeria_monocytogenes_serotype_1_2a_str_08-6569_1196183 | Listeria_monocytogenes_1639_v185 | 0.9454 |
| Listeria_monocytogenes_serotype_1_2a_str_08-6056_1196182 | Listeria_monocytogenes_1639_v185 | 0.9454 |
| Listeria_monocytogenes_serotype_1_2a_str_04-5457_1196181 | Listeria_monocytogenes_1639_v185 | 0.95   |
| Listeria_monocytogenes_serotype_1_2a_str_02-5993_1196180 | Listeria_monocytogenes_1639_v185 | 0.95   |
| Listeria_monocytogenes_R479a_1437838                     | Listeria_monocytogenes_1639_v185 | 0.9489 |
| Listeria_monocytogenes_N53-1_1234142                     | Listeria_monocytogenes_1639_v185 | 0.9186 |
| Listeria_monocytogenes_M7_1030009                        | Listeria_monocytogenes_1639_v185 | 0.9089 |
| Listeria_monocytogenes_LO28_393132                       | Listeria_monocytogenes_1639_v185 | 0.9536 |
| Listeria_monocytogenes_L99_563174                        | Listeria_monocytogenes_1639_v185 | 0.9093 |
| Listeria_monocytogenes_L312_882094                       | Listeria_monocytogenes_1639_v185 | 0.9553 |
| Listeria_monocytogenes_J1816_930781                      | Listeria_monocytogenes_1639_v185 | 0.9346 |
| Listeria_monocytogenes_J1-220_930782                     | Listeria_monocytogenes_1639_v185 | 0.9292 |
| Listeria_monocytogenes_J0161_393130                      | Listeria_monocytogenes_1639_v185 | 0.954  |
| Listeria_monocytogenes_HCC23_552536                      | Listeria_monocytogenes_1639_v185 | 0.9089 |
| Listeria_monocytogenes_FSL_R2-561_393126                 | Listeria_monocytogenes_1639_v185 | 0.9536 |
| Listeria_monocytogenes_FSL_J1-208_393119                 | Listeria_monocytogenes_1639_v185 | 0.9194 |
| Listeria_monocytogenes_FSL_J1-175_393118                 | Listeria_monocytogenes_1639_v185 | 0.9503 |
| Listeria_monocytogenes_Finland_1998_393127               | Listeria_monocytogenes_1639_v185 | 0.9742 |
| Listeria_monocytogenes_EGD-e_169963_v1                   | Listeria_monocytogenes_1639_v185 | 0.9635 |
| Listeria_monocytogenes_EGD-e_169963                      | Listeria_monocytogenes_1639_v185 | 0.9635 |
| Listeria_monocytogenes_EGD_1334565                       | Listeria_monocytogenes_1639_v185 | 0.9861 |
| Listeria_monocytogenes_CFSAN002349_1299895               | Listeria_monocytogenes_1639_v185 | 0.9539 |
| Listeria_monocytogenes_ATCC_19117_882095_v1              | Listeria_monocytogenes_1639_v185 | 0.9493 |
| Listeria_monocytogenes_ATCC_19117_882095                 | Listeria_monocytogenes_1639_v185 | 0.9489 |
| Listeria_monocytogenes_6179_1288295                      | Listeria_monocytogenes_1639_v185 | 0.9396 |
| Listeria_monocytogenes_1639_v9                           | Listeria_monocytogenes_1639_v185 | 0.9211 |
| Listeria_monocytogenes_1639_v99                          | Listeria_monocytogenes_1639_v185 | 0.9354 |
| Listeria_monocytogenes_1639_v98                          | Listeria_monocytogenes_1639_v185 | 0.9512 |
| Listeria_monocytogenes_1639_v97                          | Listeria_monocytogenes_1639_v185 | 0.9425 |
| Listeria_monocytogenes_1639_v96                          | Listeria_monocytogenes_1639_v185 | 0.9343 |
| Listeria_monocytogenes_1639_v95                          | Listeria_monocytogenes_1639_v185 | 0.9343 |
| Listeria_monocytogenes_1639_v94                          | Listeria_monocytogenes_1639_v185 | 0.935  |
| Listeria_monocytogenes_1639_v93                          | Listeria_monocytogenes_1639_v185 | 0.95   |
| Listeria_monocytogenes_1639_v92                          | Listeria_monocytogenes_1639_v185 | 0.935  |
| Listeria_monocytogenes_1639_v91                          | Listeria_monocytogenes_1639_v185 | 0.93   |
| Listeria_monocytogenes_1639_v90                          | Listeria_monocytogenes_1639_v185 | 0.9512 |
| Listeria_monocytogenes_1639_v8                           | Listeria_monocytogenes_1639_v185 | 0.9383 |
| Listeria_monocytogenes_1639_v89                          | Listeria_monocytogenes_1639_v185 | 0.9457 |
| Listeria_monocytogenes_1639_v88                          | Listeria_monocytogenes_1639_v185 | 0.9656 |
| Listeria_monocytogenes_1639_v87                          | Listeria_monocytogenes_1639_v185 | 0.9726 |
| Listeria_monocytogenes_1639_v86                          | Listeria_monocytogenes_1639_v185 | 0.9726 |
| Listeria_monocytogenes_1639_v85                          | Listeria_monocytogenes_1639_v185 | 0.9306 |
| Listeria_monocytogenes_1639_v84                          | Listeria_monocytogenes_1639_v185 | 0.9579 |
| Listeria_monocytogenes_1639_v83                          | Listeria_monocytogenes_1639_v185 | 0.938  |
| Listeria_monocytogenes_1639_v82                          | Listeria_monocytogenes_1639_v185 | 0.9377 |
| Listeria_monocytogenes_1639_v81                          | Listeria_monocytogenes_1639_v185 | 0.9534 |
| Listeria_monocytogenes_1639_v80                          | Listeria_monocytogenes_1639_v185 | 0.9406 |
| Listeria_monocytogenes_1639_v7                           | Listeria_monocytogenes_1639_v185 | 0.9383 |
| Listeria_monocytogenes_1639_v79                          | Listeria_monocytogenes_1639_v185 | 0.9516 |
| Listeria_monocytogenes_1639_v78                          | Listeria_monocytogenes_1639_v185 | 0.9527 |
| Listeria_monocytogenes_1639_v77                          | Listeria_monocytogenes_1639_v185 | 0.9582 |
| Listeria_monocytogenes_1639_v76                          | Listeria_monocytogenes_1639_v185 | 0.9477 |
| Listeria_monocytogenes_1639_v75                          | Listeria_monocytogenes_1639_v185 | 0.9093 |
| Listeria_monocytogenes_1639_v74                          | Listeria_monocytogenes_1639_v185 | 0.9718 |
| Listeria_monocytogenes_1639_v73                          | Listeria_monocytogenes_1639_v185 | 0.9485 |
| Listeria_monocytogenes_1639_v72                          | Listeria_monocytogenes_1639_v185 | 0.9365 |
| Listeria_monocytogenes_1639_v71                          | Listeria_monocytogenes_1639_v185 | 0.9396 |
| Listeria_monocytogenes_1639_v70                          | Listeria_monocytogenes_1639_v185 | 0.951  |
| Listeria_monocytogenes_1639_v6                           | Listeria_monocytogenes_1639_v185 | 0.938  |
| Listeria_monocytogenes_1639_v69                          | Listeria_monocytogenes_1639_v185 | 0.9324 |
| Listeria_monocytogenes_1639_v68                          | Listeria_monocytogenes_1639_v185 | 0.9572 |
| Listeria_monocytogenes_1639_v67                          | Listeria_monocytogenes_1639_v185 | 0.9415 |
| Listeria_monocytogenes_1639_v66                          | Listeria_monocytogenes_1639_v185 | 0.9623 |
| Listeria_monocytogenes_1639_v65                          | Listeria_monocytogenes_1639_v185 | 0.9525 |
| Listeria_monocytogenes_1639_v64                          | Listeria_monocytogenes_1639_v185 | 0.9546 |
| Listeria_monocytogenes_1639_v63                          | Listeria_monocytogenes_1639_v185 | 0.9373 |
| Listeria_monocytogenes_1639_v62                          | Listeria_monocytogenes_1639_v185 | 0.949  |
| Listeria_monocytogenes_1639_v61                          | Listeria_monocytogenes_1639_v185 | 0.9525 |
| Listeria_monocytogenes_1639_v60                          | Listeria_monocytogenes_1639_v185 | 0.9564 |
| Listeria_monocytogenes_1639_v5                           | Listeria_monocytogenes_1639_v185 | 0.9014 |
| Listeria_monocytogenes_1639_v59                          | Listeria_monocytogenes_1639_v185 | 0.9384 |
| Listeria_monocytogenes_1639_v58                          | Listeria_monocytogenes_1639_v185 | 0.938  |
| Listeria_monocytogenes_1639_v57                          | Listeria_monocytogenes_1639_v185 | 0.9308 |
| Listeria_monocytogenes_1639_v56                          | Listeria_monocytogenes_1639_v185 | 0.9388 |
| Listeria_monocytogenes_1639_v55                          | Listeria_monocytogenes_1639_v185 | 0.9273 |
| Listeria_monocytogenes_1639_v54                          | Listeria_monocytogenes_1639_v185 | 0.9337 |
| Listeria_monocytogenes_1639_v53                          | Listeria_monocytogenes_1639_v185 | 0.9556 |
| Listeria_monocytogenes_1639_v52                          | Listeria_monocytogenes_1639_v185 | 0.9356 |
| Listeria_monocytogenes_1639_v51                          | Listeria_monocytogenes_1639_v185 | 0.9331 |

|                                                          |                                  |        |
|----------------------------------------------------------|----------------------------------|--------|
| Listeria_monocytogenes_1639_v50                          | Listeria_monocytogenes_1639_v185 | 0.9485 |
| Listeria_monocytogenes_1639_v4                           | Listeria_monocytogenes_1639_v185 | 0.9148 |
| Listeria_monocytogenes_1639_v49                          | Listeria_monocytogenes_1639_v185 | 0.9321 |
| Listeria_monocytogenes_1639_v48                          | Listeria_monocytogenes_1639_v185 | 0.9492 |
| Listeria_monocytogenes_1639_v47                          | Listeria_monocytogenes_1639_v185 | 0.9497 |
| Listeria_monocytogenes_1639_v46                          | Listeria_monocytogenes_1639_v185 | 0.9565 |
| Listeria_monocytogenes_1639_v45                          | Listeria_monocytogenes_1639_v185 | 0.9401 |
| Listeria_monocytogenes_1639_v44                          | Listeria_monocytogenes_1639_v185 | 0.95   |
| Listeria_monocytogenes_1639_v43                          | Listeria_monocytogenes_1639_v185 | 0.95   |
| Listeria_monocytogenes_1639_v42                          | Listeria_monocytogenes_1639_v185 | 0.9417 |
| Listeria_monocytogenes_1639_v41                          | Listeria_monocytogenes_1639_v185 | 0.9319 |
| Listeria_monocytogenes_1639_v40                          | Listeria_monocytogenes_1639_v185 | 0.9539 |
| Listeria_monocytogenes_1639_v3                           | Listeria_monocytogenes_1639_v185 | 0.9151 |
| Listeria_monocytogenes_1639_v39                          | Listeria_monocytogenes_1639_v185 | 0.9373 |
| Listeria_monocytogenes_1639_v38                          | Listeria_monocytogenes_1639_v185 | 0.951  |
| Listeria_monocytogenes_1639_v37                          | Listeria_monocytogenes_1639_v185 | 0.9472 |
| Listeria_monocytogenes_1639_v36                          | Listeria_monocytogenes_1639_v185 | 0.9495 |
| Listeria_monocytogenes_1639_v35                          | Listeria_monocytogenes_1639_v185 | 0.9546 |
| Listeria_monocytogenes_1639_v34                          | Listeria_monocytogenes_1639_v185 | 0.9485 |
| Listeria_monocytogenes_1639_v33                          | Listeria_monocytogenes_1639_v185 | 0.9362 |
| Listeria_monocytogenes_1639_v32                          | Listeria_monocytogenes_1639_v185 | 0.9457 |
| Listeria_monocytogenes_1639_v31                          | Listeria_monocytogenes_1639_v185 | 0.9488 |
| Listeria_monocytogenes_1639_v30                          | Listeria_monocytogenes_1639_v185 | 0.9377 |
| Listeria_monocytogenes_1639_v2                           | Listeria_monocytogenes_1639_v185 | 0.9036 |
| Listeria_monocytogenes_1639_v29                          | Listeria_monocytogenes_1639_v185 | 0.9404 |
| Listeria_monocytogenes_1639_v28                          | Listeria_monocytogenes_1639_v185 | 0.9449 |
| Listeria_monocytogenes_1639_v27                          | Listeria_monocytogenes_1639_v185 | 0.9354 |
| Listeria_monocytogenes_1639_v26                          | Listeria_monocytogenes_1639_v185 | 0.9348 |
| Listeria_monocytogenes_1639_v25                          | Listeria_monocytogenes_1639_v185 | 0.9348 |
| Listeria_monocytogenes_1639_v24                          | Listeria_monocytogenes_1639_v185 | 0.9292 |
| Listeria_monocytogenes_1639_v23                          | Listeria_monocytogenes_1639_v185 | 0.9288 |
| Listeria_monocytogenes_1639_v22                          | Listeria_monocytogenes_1639_v185 | 0.9373 |
| Listeria_monocytogenes_1639_v21                          | Listeria_monocytogenes_1639_v185 | 0.9292 |
| Listeria_monocytogenes_1639_v20                          | Listeria_monocytogenes_1639_v185 | 0.9332 |
| Listeria_monocytogenes_1639_v1                           | Listeria_monocytogenes_1639_v185 | 0.933  |
| Listeria_monocytogenes_1639_v19                          | Listeria_monocytogenes_1639_v185 | 0.9329 |
| Listeria_monocytogenes_1639_v198                         | Listeria_monocytogenes_1639_v185 | 0.9204 |
| Listeria_monocytogenes_1639_v197                         | Listeria_monocytogenes_1639_v185 | 0.9495 |
| Listeria_monocytogenes_1639_v196                         | Listeria_monocytogenes_1639_v185 | 0.9694 |
| Listeria_monocytogenes_1639_v195                         | Listeria_monocytogenes_1639_v185 | 0.9583 |
| Listeria_monocytogenes_1639_v194                         | Listeria_monocytogenes_1639_v185 | 0.956  |
| Listeria_monocytogenes_1639_v193                         | Listeria_monocytogenes_1639_v185 | 0.9564 |
| Listeria_monocytogenes_1639_v192                         | Listeria_monocytogenes_1639_v185 | 0.9122 |
| Listeria_monocytogenes_1639_v191                         | Listeria_monocytogenes_1639_v185 | 0.9824 |
| Listeria_monocytogenes_1639_v190                         | Listeria_monocytogenes_1639_v185 | 0.9996 |
| Listeria_monocytogenes_1639_v18                          | Listeria_monocytogenes_1639_v185 | 0.9248 |
| Listeria_monocytogenes_1639_v189                         | Listeria_monocytogenes_1639_v185 | 0.9984 |
| Listeria_monocytogenes_1639_v188                         | Listeria_monocytogenes_1639_v185 | 0.9773 |
| Listeria_monocytogenes_1639_v187                         | Listeria_monocytogenes_1639_v185 | 0.9996 |
| Listeria_monocytogenes_1639_v186                         | Listeria_monocytogenes_1639_v185 | 0.9996 |
| Listeria_monocytogenes_1639_v185                         | Listeria_monocytogenes_1639_v185 | 0.0665 |
| Listeria_welshimeri_1643                                 | Listeria_monocytogenes_1639_v186 | 0.8837 |
| Listeria_welshimeri_serovar_6b_str_SLCC5334_386043       | Listeria_monocytogenes_1639_v186 | 0.883  |
| Listeria_seeligeri_serovar_1_2b_str_SLCC3954_683837      | Listeria_monocytogenes_1639_v186 | 0.8954 |
| Listeria_seeligeri_FSL_S4-171_702452                     | Listeria_monocytogenes_1639_v186 | 0.8272 |
| Listeria_seeligeri_FSL_N1-067_702453                     | Listeria_monocytogenes_1639_v186 | 0.8363 |
| Listeria_seeligeri_1640_v1                               | Listeria_monocytogenes_1639_v186 | 0.8937 |
| Listeria_seeligeri_1640                                  | Listeria_monocytogenes_1639_v186 | 0.8844 |
| Listeria_monocytogenes_WSLC1042_1457188                  | Listeria_monocytogenes_1639_v186 | 0.9414 |
| Listeria_monocytogenes_WSLC1001_1457187                  | Listeria_monocytogenes_1639_v186 | 0.9808 |
| Listeria_monocytogenes_SLCC7179_879090                   | Listeria_monocytogenes_1639_v186 | 0.9706 |
| Listeria_monocytogenes_SLCC5850_882096                   | Listeria_monocytogenes_1639_v186 | 0.9857 |
| Listeria_monocytogenes_SLCC2755_932919                   | Listeria_monocytogenes_1639_v186 | 0.9461 |
| Listeria_monocytogenes_SLCC2540_879089                   | Listeria_monocytogenes_1639_v186 | 0.9455 |
| Listeria_monocytogenes_SLCC2479_882020                   | Listeria_monocytogenes_1639_v186 | 0.955  |
| Listeria_monocytogenes_SLCC2378_879088                   | Listeria_monocytogenes_1639_v186 | 0.9429 |
| Listeria_monocytogenes_SLCC2376_882097                   | Listeria_monocytogenes_1639_v186 | 0.956  |
| Listeria_monocytogenes_SLCC2372_932920                   | Listeria_monocytogenes_1639_v186 | 0.9474 |
| Listeria_monocytogenes_serotype_4b_str_LL195_1230340     | Listeria_monocytogenes_1639_v186 | 0.9491 |
| Listeria_monocytogenes_serotype_4b_str_LIS0087_1134669   | Listeria_monocytogenes_1639_v186 | 0.9615 |
| Listeria_monocytogenes_serotype_4b_str_F2365_265669      | Listeria_monocytogenes_1639_v186 | 0.9491 |
| Listeria_monocytogenes_serotype_4b_str_CLIP_80459_568819 | Listeria_monocytogenes_1639_v186 | 0.9557 |
| Listeria_monocytogenes_serotype_4b_str_81-0861_1196161   | Listeria_monocytogenes_1639_v186 | 0.9313 |
| Listeria_monocytogenes_serotype_4b_str_81-0592_1196160   | Listeria_monocytogenes_1639_v186 | 0.9324 |
| Listeria_monocytogenes_serotype_4b_str_81-0558_1196159   | Listeria_monocytogenes_1639_v186 | 0.9335 |
| Listeria_monocytogenes_serotype_4b_str_10-0809_1196162   | Listeria_monocytogenes_1639_v186 | 0.9328 |
| Listeria_monocytogenes_serotype_4b_str_02-6680_1196175   | Listeria_monocytogenes_1639_v186 | 0.9542 |
| Listeria_monocytogenes_serotype_4b_str_02-6679_1196174   | Listeria_monocytogenes_1639_v186 | 0.9542 |
| Listeria_monocytogenes_serotype_4b_str_02-1792_1196173   | Listeria_monocytogenes_1639_v186 | 0.9332 |
| Listeria_monocytogenes_serotype_4b_str_02-1289_1196172   | Listeria_monocytogenes_1639_v186 | 0.9332 |
| Listeria_monocytogenes_serotype_4b_str_02-1103_1196171   | Listeria_monocytogenes_1639_v186 | 0.9332 |
| Listeria_monocytogenes_serotype_3c_str_10-5027_1196195   | Listeria_monocytogenes_1639_v186 | 0.9543 |
| Listeria_monocytogenes_serotype_1_2c_str_10-5026_1196194 | Listeria_monocytogenes_1639_v186 | 0.9554 |
| Listeria_monocytogenes_serotype_1_2c_str_10-5025_1196193 | Listeria_monocytogenes_1639_v186 | 0.9554 |
| Listeria_monocytogenes_serotype_1_2b_str_10-0811_1196164 | Listeria_monocytogenes_1639_v186 | 0.9359 |
| Listeria_monocytogenes_serotype_1_2b_str_10-0810_1196163 | Listeria_monocytogenes_1639_v186 | 0.9359 |
| Listeria_monocytogenes_serotype_1_2a_str_99-6370_1196179 | Listeria_monocytogenes_1639_v186 | 0.944  |
| Listeria_monocytogenes_serotype_1_2a_str_98-2035_1196178 | Listeria_monocytogenes_1639_v186 | 0.944  |
| Listeria_monocytogenes_serotype_1_2a_str_95-0093_1196177 | Listeria_monocytogenes_1639_v186 | 0.95   |
| Listeria_monocytogenes_serotype_1_2a_str_88-0478_1196176 | Listeria_monocytogenes_1639_v186 | 0.9492 |
| Listeria_monocytogenes_serotype_1_2a_str_10-5024_1196192 | Listeria_monocytogenes_1639_v186 | 0.9504 |

|                                                          |                                  |        |
|----------------------------------------------------------|----------------------------------|--------|
| Listeria_monocytogenes_serotype_1_2a_str_10-4758_1196168 | Listeria_monocytogenes_1639_v186 | 0.9642 |
| Listeria_monocytogenes_serotype_1_2a_str_10-4754_1196167 | Listeria_monocytogenes_1639_v186 | 0.9642 |
| Listeria_monocytogenes_serotype_1_2a_str_10-1321_1196191 | Listeria_monocytogenes_1639_v186 | 0.9504 |
| Listeria_monocytogenes_serotype_1_2a_str_10-1047_1196190 | Listeria_monocytogenes_1639_v186 | 0.9508 |
| Listeria_monocytogenes_serotype_1_2a_str_10-1046_1196189 | Listeria_monocytogenes_1639_v186 | 0.9508 |
| Listeria_monocytogenes_serotype_1_2a_str_10-0934_1196170 | Listeria_monocytogenes_1639_v186 | 0.9863 |
| Listeria_monocytogenes_serotype_1_2a_str_10-0933_1196169 | Listeria_monocytogenes_1639_v186 | 0.9863 |
| Listeria_monocytogenes_serotype_1_2a_str_10-0815_1196188 | Listeria_monocytogenes_1639_v186 | 0.9454 |
| Listeria_monocytogenes_serotype_1_2a_str_10-0814_1196187 | Listeria_monocytogenes_1639_v186 | 0.95   |
| Listeria_monocytogenes_serotype_1_2a_str_10-0813_1196166 | Listeria_monocytogenes_1639_v186 | 0.9778 |
| Listeria_monocytogenes_serotype_1_2a_str_10-0812_1196165 | Listeria_monocytogenes_1639_v186 | 0.9778 |
| Listeria_monocytogenes_serotype_1_2a_str_08-7669_1196186 | Listeria_monocytogenes_1639_v186 | 0.9602 |
| Listeria_monocytogenes_serotype_1_2a_str_08-7374_1196185 | Listeria_monocytogenes_1639_v186 | 0.9504 |
| Listeria_monocytogenes_serotype_1_2a_str_08-6997_1196184 | Listeria_monocytogenes_1639_v186 | 0.9454 |
| Listeria_monocytogenes_serotype_1_2a_str_08-6569_1196183 | Listeria_monocytogenes_1639_v186 | 0.9454 |
| Listeria_monocytogenes_serotype_1_2a_str_08-6056_1196182 | Listeria_monocytogenes_1639_v186 | 0.9454 |
| Listeria_monocytogenes_serotype_1_2a_str_04-5457_1196181 | Listeria_monocytogenes_1639_v186 | 0.9504 |
| Listeria_monocytogenes_serotype_1_2a_str_02-5993_1196180 | Listeria_monocytogenes_1639_v186 | 0.95   |
| Listeria_monocytogenes_R479a_1437838                     | Listeria_monocytogenes_1639_v186 | 0.9489 |
| Listeria_monocytogenes_N53-1_1234142                     | Listeria_monocytogenes_1639_v186 | 0.9186 |
| Listeria_monocytogenes_M7_1030009                        | Listeria_monocytogenes_1639_v186 | 0.9089 |
| Listeria_monocytogenes_LO28_393132                       | Listeria_monocytogenes_1639_v186 | 0.9536 |
| Listeria_monocytogenes_L99_563174                        | Listeria_monocytogenes_1639_v186 | 0.9096 |
| Listeria_monocytogenes_L312_882094                       | Listeria_monocytogenes_1639_v186 | 0.9557 |
| Listeria_monocytogenes_J1816_930781                      | Listeria_monocytogenes_1639_v186 | 0.9346 |
| Listeria_monocytogenes_J1-220_930782                     | Listeria_monocytogenes_1639_v186 | 0.9288 |
| Listeria_monocytogenes_J0161_393130                      | Listeria_monocytogenes_1639_v186 | 0.9543 |
| Listeria_monocytogenes_HCC23_552536                      | Listeria_monocytogenes_1639_v186 | 0.9093 |
| Listeria_monocytogenes_FSL_R2-561_393126                 | Listeria_monocytogenes_1639_v186 | 0.9536 |
| Listeria_monocytogenes_FSL_J1-208_393119                 | Listeria_monocytogenes_1639_v186 | 0.9194 |
| Listeria_monocytogenes_FSL_J1-175_393118                 | Listeria_monocytogenes_1639_v186 | 0.9499 |
| Listeria_monocytogenes_Finland_1998_393127               | Listeria_monocytogenes_1639_v186 | 0.9742 |
| Listeria_monocytogenes_EGD-e_169963_v1                   | Listeria_monocytogenes_1639_v186 | 0.9635 |
| Listeria_monocytogenes_EGD-e_169963                      | Listeria_monocytogenes_1639_v186 | 0.9635 |
| Listeria_monocytogenes_EGD_1334565                       | Listeria_monocytogenes_1639_v186 | 0.9865 |
| Listeria_monocytogenes_CFSAN002349_1299895               | Listeria_monocytogenes_1639_v186 | 0.9539 |
| Listeria_monocytogenes_ATCC_19117_882095_v1              | Listeria_monocytogenes_1639_v186 | 0.9489 |
| Listeria_monocytogenes_ATCC_19117_882095                 | Listeria_monocytogenes_1639_v186 | 0.9489 |
| Listeria_monocytogenes_6179_1288295                      | Listeria_monocytogenes_1639_v186 | 0.94   |
| Listeria_monocytogenes_1639_v9                           | Listeria_monocytogenes_1639_v186 | 0.9207 |
| Listeria_monocytogenes_1639_v99                          | Listeria_monocytogenes_1639_v186 | 0.9354 |
| Listeria_monocytogenes_1639_v98                          | Listeria_monocytogenes_1639_v186 | 0.9516 |
| Listeria_monocytogenes_1639_v97                          | Listeria_monocytogenes_1639_v186 | 0.9421 |
| Listeria_monocytogenes_1639_v96                          | Listeria_monocytogenes_1639_v186 | 0.9343 |
| Listeria_monocytogenes_1639_v95                          | Listeria_monocytogenes_1639_v186 | 0.9343 |
| Listeria_monocytogenes_1639_v94                          | Listeria_monocytogenes_1639_v186 | 0.9347 |
| Listeria_monocytogenes_1639_v93                          | Listeria_monocytogenes_1639_v186 | 0.9496 |
| Listeria_monocytogenes_1639_v92                          | Listeria_monocytogenes_1639_v186 | 0.935  |
| Listeria_monocytogenes_1639_v91                          | Listeria_monocytogenes_1639_v186 | 0.9303 |
| Listeria_monocytogenes_1639_v90                          | Listeria_monocytogenes_1639_v186 | 0.9516 |
| Listeria_monocytogenes_1639_v8                           | Listeria_monocytogenes_1639_v186 | 0.9387 |
| Listeria_monocytogenes_1639_v89                          | Listeria_monocytogenes_1639_v186 | 0.9453 |
| Listeria_monocytogenes_1639_v88                          | Listeria_monocytogenes_1639_v186 | 0.966  |
| Listeria_monocytogenes_1639_v87                          | Listeria_monocytogenes_1639_v186 | 0.9726 |
| Listeria_monocytogenes_1639_v86                          | Listeria_monocytogenes_1639_v186 | 0.9722 |
| Listeria_monocytogenes_1639_v85                          | Listeria_monocytogenes_1639_v186 | 0.9306 |
| Listeria_monocytogenes_1639_v84                          | Listeria_monocytogenes_1639_v186 | 0.9582 |
| Listeria_monocytogenes_1639_v83                          | Listeria_monocytogenes_1639_v186 | 0.9377 |
| Listeria_monocytogenes_1639_v82                          | Listeria_monocytogenes_1639_v186 | 0.9373 |
| Listeria_monocytogenes_1639_v81                          | Listeria_monocytogenes_1639_v186 | 0.9537 |
| Listeria_monocytogenes_1639_v80                          | Listeria_monocytogenes_1639_v186 | 0.9406 |
| Listeria_monocytogenes_1639_v7                           | Listeria_monocytogenes_1639_v186 | 0.9387 |
| Listeria_monocytogenes_1639_v79                          | Listeria_monocytogenes_1639_v186 | 0.9516 |
| Listeria_monocytogenes_1639_v78                          | Listeria_monocytogenes_1639_v186 | 0.953  |
| Listeria_monocytogenes_1639_v77                          | Listeria_monocytogenes_1639_v186 | 0.9582 |
| Listeria_monocytogenes_1639_v76                          | Listeria_monocytogenes_1639_v186 | 0.9473 |
| Listeria_monocytogenes_1639_v75                          | Listeria_monocytogenes_1639_v186 | 0.9096 |
| Listeria_monocytogenes_1639_v74                          | Listeria_monocytogenes_1639_v186 | 0.9718 |
| Listeria_monocytogenes_1639_v73                          | Listeria_monocytogenes_1639_v186 | 0.9485 |
| Listeria_monocytogenes_1639_v72                          | Listeria_monocytogenes_1639_v186 | 0.9364 |
| Listeria_monocytogenes_1639_v71                          | Listeria_monocytogenes_1639_v186 | 0.9396 |
| Listeria_monocytogenes_1639_v70                          | Listeria_monocytogenes_1639_v186 | 0.9514 |
| Listeria_monocytogenes_1639_v6                           | Listeria_monocytogenes_1639_v186 | 0.938  |
| Listeria_monocytogenes_1639_v69                          | Listeria_monocytogenes_1639_v186 | 0.9328 |
| Listeria_monocytogenes_1639_v68                          | Listeria_monocytogenes_1639_v186 | 0.9576 |
| Listeria_monocytogenes_1639_v67                          | Listeria_monocytogenes_1639_v186 | 0.9419 |
| Listeria_monocytogenes_1639_v66                          | Listeria_monocytogenes_1639_v186 | 0.9627 |
| Listeria_monocytogenes_1639_v65                          | Listeria_monocytogenes_1639_v186 | 0.9529 |
| Listeria_monocytogenes_1639_v64                          | Listeria_monocytogenes_1639_v186 | 0.955  |
| Listeria_monocytogenes_1639_v63                          | Listeria_monocytogenes_1639_v186 | 0.9369 |
| Listeria_monocytogenes_1639_v62                          | Listeria_monocytogenes_1639_v186 | 0.9494 |
| Listeria_monocytogenes_1639_v61                          | Listeria_monocytogenes_1639_v186 | 0.9529 |
| Listeria_monocytogenes_1639_v60                          | Listeria_monocytogenes_1639_v186 | 0.9568 |
| Listeria_monocytogenes_1639_v5                           | Listeria_monocytogenes_1639_v186 | 0.9014 |
| Listeria_monocytogenes_1639_v59                          | Listeria_monocytogenes_1639_v186 | 0.9384 |
| Listeria_monocytogenes_1639_v58                          | Listeria_monocytogenes_1639_v186 | 0.938  |
| Listeria_monocytogenes_1639_v57                          | Listeria_monocytogenes_1639_v186 | 0.9308 |
| Listeria_monocytogenes_1639_v56                          | Listeria_monocytogenes_1639_v186 | 0.9384 |
| Listeria_monocytogenes_1639_v55                          | Listeria_monocytogenes_1639_v186 | 0.9273 |
| Listeria_monocytogenes_1639_v54                          | Listeria_monocytogenes_1639_v186 | 0.9337 |
| Listeria_monocytogenes_1639_v53                          | Listeria_monocytogenes_1639_v186 | 0.9556 |

|                                                          |                                  |        |
|----------------------------------------------------------|----------------------------------|--------|
| Listeria_monocytogenes_1639_v52                          | Listeria_monocytogenes_1639_v186 | 0.9352 |
| Listeria_monocytogenes_1639_v51                          | Listeria_monocytogenes_1639_v186 | 0.9331 |
| Listeria_monocytogenes_1639_v50                          | Listeria_monocytogenes_1639_v186 | 0.9489 |
| Listeria_monocytogenes_1639_v4                           | Listeria_monocytogenes_1639_v186 | 0.9144 |
| Listeria_monocytogenes_1639_v49                          | Listeria_monocytogenes_1639_v186 | 0.9324 |
| Listeria_monocytogenes_1639_v48                          | Listeria_monocytogenes_1639_v186 | 0.9492 |
| Listeria_monocytogenes_1639_v47                          | Listeria_monocytogenes_1639_v186 | 0.95   |
| Listeria_monocytogenes_1639_v46                          | Listeria_monocytogenes_1639_v186 | 0.9568 |
| Listeria_monocytogenes_1639_v45                          | Listeria_monocytogenes_1639_v186 | 0.9401 |
| Listeria_monocytogenes_1639_v44                          | Listeria_monocytogenes_1639_v186 | 0.9504 |
| Listeria_monocytogenes_1639_v43                          | Listeria_monocytogenes_1639_v186 | 0.9504 |
| Listeria_monocytogenes_1639_v42                          | Listeria_monocytogenes_1639_v186 | 0.9417 |
| Listeria_monocytogenes_1639_v41                          | Listeria_monocytogenes_1639_v186 | 0.9323 |
| Listeria_monocytogenes_1639_v40                          | Listeria_monocytogenes_1639_v186 | 0.9539 |
| Listeria_monocytogenes_1639_v3                           | Listeria_monocytogenes_1639_v186 | 0.9148 |
| Listeria_monocytogenes_1639_v39                          | Listeria_monocytogenes_1639_v186 | 0.9369 |
| Listeria_monocytogenes_1639_v38                          | Listeria_monocytogenes_1639_v186 | 0.951  |
| Listeria_monocytogenes_1639_v37                          | Listeria_monocytogenes_1639_v186 | 0.9475 |
| Listeria_monocytogenes_1639_v36                          | Listeria_monocytogenes_1639_v186 | 0.9495 |
| Listeria_monocytogenes_1639_v35                          | Listeria_monocytogenes_1639_v186 | 0.9546 |
| Listeria_monocytogenes_1639_v34                          | Listeria_monocytogenes_1639_v186 | 0.9488 |
| Listeria_monocytogenes_1639_v33                          | Listeria_monocytogenes_1639_v186 | 0.9359 |
| Listeria_monocytogenes_1639_v32                          | Listeria_monocytogenes_1639_v186 | 0.9461 |
| Listeria_monocytogenes_1639_v31                          | Listeria_monocytogenes_1639_v186 | 0.9492 |
| Listeria_monocytogenes_1639_v30                          | Listeria_monocytogenes_1639_v186 | 0.9376 |
| Listeria_monocytogenes_1639_v2                           | Listeria_monocytogenes_1639_v186 | 0.9039 |
| Listeria_monocytogenes_1639_v29                          | Listeria_monocytogenes_1639_v186 | 0.9404 |
| Listeria_monocytogenes_1639_v28                          | Listeria_monocytogenes_1639_v186 | 0.9449 |
| Listeria_monocytogenes_1639_v27                          | Listeria_monocytogenes_1639_v186 | 0.9354 |
| Listeria_monocytogenes_1639_v26                          | Listeria_monocytogenes_1639_v186 | 0.9351 |
| Listeria_monocytogenes_1639_v25                          | Listeria_monocytogenes_1639_v186 | 0.9348 |
| Listeria_monocytogenes_1639_v24                          | Listeria_monocytogenes_1639_v186 | 0.9288 |
| Listeria_monocytogenes_1639_v23                          | Listeria_monocytogenes_1639_v186 | 0.9288 |
| Listeria_monocytogenes_1639_v22                          | Listeria_monocytogenes_1639_v186 | 0.9373 |
| Listeria_monocytogenes_1639_v21                          | Listeria_monocytogenes_1639_v186 | 0.9288 |
| Listeria_monocytogenes_1639_v20                          | Listeria_monocytogenes_1639_v186 | 0.9332 |
| Listeria_monocytogenes_1639_v1                           | Listeria_monocytogenes_1639_v186 | 0.933  |
| Listeria_monocytogenes_1639_v19                          | Listeria_monocytogenes_1639_v186 | 0.9329 |
| Listeria_monocytogenes_1639_v198                         | Listeria_monocytogenes_1639_v186 | 0.9207 |
| Listeria_monocytogenes_1639_v197                         | Listeria_monocytogenes_1639_v186 | 0.9498 |
| Listeria_monocytogenes_1639_v196                         | Listeria_monocytogenes_1639_v186 | 0.9698 |
| Listeria_monocytogenes_1639_v195                         | Listeria_monocytogenes_1639_v186 | 0.9583 |
| Listeria_monocytogenes_1639_v194                         | Listeria_monocytogenes_1639_v186 | 0.9564 |
| Listeria_monocytogenes_1639_v193                         | Listeria_monocytogenes_1639_v186 | 0.9568 |
| Listeria_monocytogenes_1639_v192                         | Listeria_monocytogenes_1639_v186 | 0.9122 |
| Listeria_monocytogenes_1639_v191                         | Listeria_monocytogenes_1639_v186 | 0.9828 |
| Listeria_monocytogenes_1639_v190                         | Listeria_monocytogenes_1639_v186 | 0.9996 |
| Listeria_monocytogenes_1639_v18                          | Listeria_monocytogenes_1639_v186 | 0.9248 |
| Listeria_monocytogenes_1639_v189                         | Listeria_monocytogenes_1639_v186 | 0.9988 |
| Listeria_monocytogenes_1639_v188                         | Listeria_monocytogenes_1639_v186 | 0.9777 |
| Listeria_monocytogenes_1639_v187                         | Listeria_monocytogenes_1639_v186 | 0.9992 |
| Listeria_monocytogenes_1639_v186                         | Listeria_monocytogenes_1639_v186 | 0.0661 |
| Listeria_welshimeri_1643                                 | Listeria_monocytogenes_1639_v187 | 0.883  |
| Listeria_welshimeri_serovar_6b_str_SLCC5334_386043       | Listeria_monocytogenes_1639_v187 | 0.8826 |
| Listeria_seeligeri_serovar_1_2b_str_SLCC3954_683837      | Listeria_monocytogenes_1639_v187 | 0.8954 |
| Listeria_seeligeri_FSL_S4-171_702452                     | Listeria_monocytogenes_1639_v187 | 0.8265 |
| Listeria_seeligeri_FSL_N1-067_702453                     | Listeria_monocytogenes_1639_v187 | 0.8359 |
| Listeria_seeligeri_1640_v1                               | Listeria_monocytogenes_1639_v187 | 0.8937 |
| Listeria_seeligeri_1640                                  | Listeria_monocytogenes_1639_v187 | 0.8836 |
| Listeria_monocytogenes_WSLC1042_1457188                  | Listeria_monocytogenes_1639_v187 | 0.941  |
| Listeria_monocytogenes_WSLC1001_1457187                  | Listeria_monocytogenes_1639_v187 | 0.98   |
| Listeria_monocytogenes_SLCC7179_879090                   | Listeria_monocytogenes_1639_v187 | 0.9698 |
| Listeria_monocytogenes_SLCC5850_882096                   | Listeria_monocytogenes_1639_v187 | 0.985  |
| Listeria_monocytogenes_SLCC2755_932919                   | Listeria_monocytogenes_1639_v187 | 0.9453 |
| Listeria_monocytogenes_SLCC2540_879089                   | Listeria_monocytogenes_1639_v187 | 0.9447 |
| Listeria_monocytogenes_SLCC2479_882020                   | Listeria_monocytogenes_1639_v187 | 0.9546 |
| Listeria_monocytogenes_SLCC2378_879088                   | Listeria_monocytogenes_1639_v187 | 0.9421 |
| Listeria_monocytogenes_SLCC2376_882097                   | Listeria_monocytogenes_1639_v187 | 0.9556 |
| Listeria_monocytogenes_SLCC2372_932920                   | Listeria_monocytogenes_1639_v187 | 0.9471 |
| Listeria_monocytogenes_serotype_4b_str_LL195_1230340     | Listeria_monocytogenes_1639_v187 | 0.9483 |
| Listeria_monocytogenes_serotype_4b_str_LIS0087_1134669   | Listeria_monocytogenes_1639_v187 | 0.9619 |
| Listeria_monocytogenes_serotype_4b_str_F2365_265669      | Listeria_monocytogenes_1639_v187 | 0.9483 |
| Listeria_monocytogenes_serotype_4b_str_CLIP_80459_568819 | Listeria_monocytogenes_1639_v187 | 0.9549 |
| Listeria_monocytogenes_serotype_4b_str_81-0861_1196161   | Listeria_monocytogenes_1639_v187 | 0.9309 |
| Listeria_monocytogenes_serotype_4b_str_81-0592_1196160   | Listeria_monocytogenes_1639_v187 | 0.932  |
| Listeria_monocytogenes_serotype_4b_str_81-0558_1196159   | Listeria_monocytogenes_1639_v187 | 0.9328 |
| Listeria_monocytogenes_serotype_4b_str_10-0809_1196162   | Listeria_monocytogenes_1639_v187 | 0.9324 |
| Listeria_monocytogenes_serotype_4b_str_02-6680_1196175   | Listeria_monocytogenes_1639_v187 | 0.9538 |
| Listeria_monocytogenes_serotype_4b_str_02-6679_1196174   | Listeria_monocytogenes_1639_v187 | 0.9538 |
| Listeria_monocytogenes_serotype_4b_str_02-1792_1196173   | Listeria_monocytogenes_1639_v187 | 0.9324 |
| Listeria_monocytogenes_serotype_4b_str_02-1289_1196172   | Listeria_monocytogenes_1639_v187 | 0.9324 |
| Listeria_monocytogenes_serotype_4b_str_02-1103_1196171   | Listeria_monocytogenes_1639_v187 | 0.9324 |
| Listeria_monocytogenes_serotype_3c_str_10-5027_1196195   | Listeria_monocytogenes_1639_v187 | 0.9539 |
| Listeria_monocytogenes_serotype_1_2c_str_10-5026_1196194 | Listeria_monocytogenes_1639_v187 | 0.9546 |
| Listeria_monocytogenes_serotype_1_2c_str_10-5025_1196193 | Listeria_monocytogenes_1639_v187 | 0.9546 |
| Listeria_monocytogenes_serotype_1_2b_str_10-0811_1196164 | Listeria_monocytogenes_1639_v187 | 0.9359 |
| Listeria_monocytogenes_serotype_1_2b_str_10-0810_1196163 | Listeria_monocytogenes_1639_v187 | 0.9359 |
| Listeria_monocytogenes_serotype_1_2a_str_99-6370_1196179 | Listeria_monocytogenes_1639_v187 | 0.9436 |
| Listeria_monocytogenes_serotype_1_2a_str_98-2035_1196178 | Listeria_monocytogenes_1639_v187 | 0.9436 |
| Listeria_monocytogenes_serotype_1_2a_str_95-0093_1196177 | Listeria_monocytogenes_1639_v187 | 0.9497 |
| Listeria_monocytogenes_serotype_1_2a_str_88-0478_1196176 | Listeria_monocytogenes_1639_v187 | 0.9485 |



|                                                          |                                  |        |
|----------------------------------------------------------|----------------------------------|--------|
| Listeria_monocytogenes_serotype_1_2a_str_10-5024_1196192 | Listeria_monocytogenes_1639_v187 | 0.9497 |
| Listeria_monocytogenes_serotype_1_2a_str_10-4758_1196168 | Listeria_monocytogenes_1639_v187 | 0.9642 |
| Listeria_monocytogenes_serotype_1_2a_str_10-4754_1196167 | Listeria_monocytogenes_1639_v187 | 0.9646 |
| Listeria_monocytogenes_serotype_1_2a_str_10-1321_1196191 | Listeria_monocytogenes_1639_v187 | 0.9497 |
| Listeria_monocytogenes_serotype_1_2a_str_10-1047_1196190 | Listeria_monocytogenes_1639_v187 | 0.9504 |
| Listeria_monocytogenes_serotype_1_2a_str_10-1046_1196189 | Listeria_monocytogenes_1639_v187 | 0.9504 |
| Listeria_monocytogenes_serotype_1_2a_str_10-0934_1196170 | Listeria_monocytogenes_1639_v187 | 0.986  |
| Listeria_monocytogenes_serotype_1_2a_str_10-0933_1196169 | Listeria_monocytogenes_1639_v187 | 0.986  |
| Listeria_monocytogenes_serotype_1_2a_str_10-0815_1196188 | Listeria_monocytogenes_1639_v187 | 0.945  |
| Listeria_monocytogenes_serotype_1_2a_str_10-0814_1196187 | Listeria_monocytogenes_1639_v187 | 0.9497 |
| Listeria_monocytogenes_serotype_1_2a_str_10-0813_1196166 | Listeria_monocytogenes_1639_v187 | 0.9774 |
| Listeria_monocytogenes_serotype_1_2a_str_10-0812_1196165 | Listeria_monocytogenes_1639_v187 | 0.9774 |
| Listeria_monocytogenes_serotype_1_2a_str_08-7669_1196186 | Listeria_monocytogenes_1639_v187 | 0.9598 |
| Listeria_monocytogenes_serotype_1_2a_str_08-7374_1196185 | Listeria_monocytogenes_1639_v187 | 0.9497 |
| Listeria_monocytogenes_serotype_1_2a_str_08-6997_1196184 | Listeria_monocytogenes_1639_v187 | 0.945  |
| Listeria_monocytogenes_serotype_1_2a_str_08-6569_1196183 | Listeria_monocytogenes_1639_v187 | 0.945  |
| Listeria_monocytogenes_serotype_1_2a_str_08-6056_1196182 | Listeria_monocytogenes_1639_v187 | 0.945  |
| Listeria_monocytogenes_serotype_1_2a_str_04-5457_1196181 | Listeria_monocytogenes_1639_v187 | 0.9497 |
| Listeria_monocytogenes_serotype_1_2a_str_02-5993_1196180 | Listeria_monocytogenes_1639_v187 | 0.9497 |
| Listeria_monocytogenes_R479a_1437838                     | Listeria_monocytogenes_1639_v187 | 0.9486 |
| Listeria_monocytogenes_N53-1_1234142                     | Listeria_monocytogenes_1639_v187 | 0.9183 |
| Listeria_monocytogenes_M7_1030009                        | Listeria_monocytogenes_1639_v187 | 0.9089 |
| Listeria_monocytogenes_LO28_393132                       | Listeria_monocytogenes_1639_v187 | 0.9532 |
| Listeria_monocytogenes_L99_563174                        | Listeria_monocytogenes_1639_v187 | 0.9093 |
| Listeria_monocytogenes_L312_882094                       | Listeria_monocytogenes_1639_v187 | 0.9549 |
| Listeria_monocytogenes_J1816_930781                      | Listeria_monocytogenes_1639_v187 | 0.9342 |
| Listeria_monocytogenes_J1-220_930782                     | Listeria_monocytogenes_1639_v187 | 0.9288 |
| Listeria_monocytogenes_J0161_393130                      | Listeria_monocytogenes_1639_v187 | 0.9536 |
| Listeria_monocytogenes_HCC23_552536                      | Listeria_monocytogenes_1639_v187 | 0.9089 |
| Listeria_monocytogenes_FSL_R2-561_393126                 | Listeria_monocytogenes_1639_v187 | 0.9532 |
| Listeria_monocytogenes_FSL_J1-208_393119                 | Listeria_monocytogenes_1639_v187 | 0.9194 |
| Listeria_monocytogenes_FSL_J1-175_393118                 | Listeria_monocytogenes_1639_v187 | 0.9499 |
| Listeria_monocytogenes_Finland_1998_393127               | Listeria_monocytogenes_1639_v187 | 0.9742 |
| Listeria_monocytogenes_EGD-e_169963_v1                   | Listeria_monocytogenes_1639_v187 | 0.9631 |
| Listeria_monocytogenes_EGD-e_169963                      | Listeria_monocytogenes_1639_v187 | 0.9631 |
| Listeria_monocytogenes_EGD_1334565                       | Listeria_monocytogenes_1639_v187 | 0.9857 |
| Listeria_monocytogenes_CFSAN002349_1299895               | Listeria_monocytogenes_1639_v187 | 0.9535 |
| Listeria_monocytogenes_ATCC_19117_882095_v1              | Listeria_monocytogenes_1639_v187 | 0.9489 |
| Listeria_monocytogenes_ATCC_19117_882095                 | Listeria_monocytogenes_1639_v187 | 0.9485 |
| Listeria_monocytogenes_6179_1288295                      | Listeria_monocytogenes_1639_v187 | 0.9392 |
| Listeria_monocytogenes_1639_v9                           | Listeria_monocytogenes_1639_v187 | 0.9207 |
| Listeria_monocytogenes_1639_v99                          | Listeria_monocytogenes_1639_v187 | 0.935  |
| Listeria_monocytogenes_1639_v98                          | Listeria_monocytogenes_1639_v187 | 0.9512 |
| Listeria_monocytogenes_1639_v97                          | Listeria_monocytogenes_1639_v187 | 0.9421 |
| Listeria_monocytogenes_1639_v96                          | Listeria_monocytogenes_1639_v187 | 0.9339 |
| Listeria_monocytogenes_1639_v95                          | Listeria_monocytogenes_1639_v187 | 0.9339 |
| Listeria_monocytogenes_1639_v94                          | Listeria_monocytogenes_1639_v187 | 0.9347 |
| Listeria_monocytogenes_1639_v93                          | Listeria_monocytogenes_1639_v187 | 0.9496 |
| Listeria_monocytogenes_1639_v92                          | Listeria_monocytogenes_1639_v187 | 0.9347 |
| Listeria_monocytogenes_1639_v91                          | Listeria_monocytogenes_1639_v187 | 0.9296 |
| Listeria_monocytogenes_1639_v90                          | Listeria_monocytogenes_1639_v187 | 0.9512 |
| Listeria_monocytogenes_1639_v8                           | Listeria_monocytogenes_1639_v187 | 0.9379 |
| Listeria_monocytogenes_1639_v89                          | Listeria_monocytogenes_1639_v187 | 0.9453 |
| Listeria_monocytogenes_1639_v88                          | Listeria_monocytogenes_1639_v187 | 0.9652 |
| Listeria_monocytogenes_1639_v87                          | Listeria_monocytogenes_1639_v187 | 0.9722 |
| Listeria_monocytogenes_1639_v86                          | Listeria_monocytogenes_1639_v187 | 0.9726 |
| Listeria_monocytogenes_1639_v85                          | Listeria_monocytogenes_1639_v187 | 0.9303 |
| Listeria_monocytogenes_1639_v84                          | Listeria_monocytogenes_1639_v187 | 0.9575 |
| Listeria_monocytogenes_1639_v83                          | Listeria_monocytogenes_1639_v187 | 0.9377 |
| Listeria_monocytogenes_1639_v82                          | Listeria_monocytogenes_1639_v187 | 0.9373 |
| Listeria_monocytogenes_1639_v81                          | Listeria_monocytogenes_1639_v187 | 0.9534 |
| Listeria_monocytogenes_1639_v80                          | Listeria_monocytogenes_1639_v187 | 0.9403 |
| Listeria_monocytogenes_1639_v7                           | Listeria_monocytogenes_1639_v187 | 0.9379 |
| Listeria_monocytogenes_1639_v79                          | Listeria_monocytogenes_1639_v187 | 0.9516 |
| Listeria_monocytogenes_1639_v78                          | Listeria_monocytogenes_1639_v187 | 0.9527 |
| Listeria_monocytogenes_1639_v77                          | Listeria_monocytogenes_1639_v187 | 0.9578 |
| Listeria_monocytogenes_1639_v76                          | Listeria_monocytogenes_1639_v187 | 0.9477 |
| Listeria_monocytogenes_1639_v75                          | Listeria_monocytogenes_1639_v187 | 0.9093 |
| Listeria_monocytogenes_1639_v74                          | Listeria_monocytogenes_1639_v187 | 0.9718 |
| Listeria_monocytogenes_1639_v73                          | Listeria_monocytogenes_1639_v187 | 0.9481 |
| Listeria_monocytogenes_1639_v72                          | Listeria_monocytogenes_1639_v187 | 0.9361 |
| Listeria_monocytogenes_1639_v71                          | Listeria_monocytogenes_1639_v187 | 0.9392 |
| Listeria_monocytogenes_1639_v70                          | Listeria_monocytogenes_1639_v187 | 0.9507 |
| Listeria_monocytogenes_1639_v6                           | Listeria_monocytogenes_1639_v187 | 0.9376 |
| Listeria_monocytogenes_1639_v69                          | Listeria_monocytogenes_1639_v187 | 0.932  |
| Listeria_monocytogenes_1639_v68                          | Listeria_monocytogenes_1639_v187 | 0.9568 |
| Listeria_monocytogenes_1639_v67                          | Listeria_monocytogenes_1639_v187 | 0.9412 |
| Listeria_monocytogenes_1639_v66                          | Listeria_monocytogenes_1639_v187 | 0.9619 |
| Listeria_monocytogenes_1639_v65                          | Listeria_monocytogenes_1639_v187 | 0.9522 |
| Listeria_monocytogenes_1639_v64                          | Listeria_monocytogenes_1639_v187 | 0.9542 |
| Listeria_monocytogenes_1639_v63                          | Listeria_monocytogenes_1639_v187 | 0.9369 |
| Listeria_monocytogenes_1639_v62                          | Listeria_monocytogenes_1639_v187 | 0.949  |
| Listeria_monocytogenes_1639_v61                          | Listeria_monocytogenes_1639_v187 | 0.9521 |
| Listeria_monocytogenes_1639_v60                          | Listeria_monocytogenes_1639_v187 | 0.956  |
| Listeria_monocytogenes_1639_v5                           | Listeria_monocytogenes_1639_v187 | 0.9011 |
| Listeria_monocytogenes_1639_v59                          | Listeria_monocytogenes_1639_v187 | 0.938  |
| Listeria_monocytogenes_1639_v58                          | Listeria_monocytogenes_1639_v187 | 0.9376 |
| Listeria_monocytogenes_1639_v57                          | Listeria_monocytogenes_1639_v187 | 0.9304 |
| Listeria_monocytogenes_1639_v56                          | Listeria_monocytogenes_1639_v187 | 0.9384 |
| Listeria_monocytogenes_1639_v55                          | Listeria_monocytogenes_1639_v187 | 0.9269 |
| Listeria_monocytogenes_1639_v54                          | Listeria_monocytogenes_1639_v187 | 0.9334 |

|                                                          |                                  |        |
|----------------------------------------------------------|----------------------------------|--------|
| Listeria_monocytogenes_1639_v53                          | Listeria_monocytogenes_1639_v187 | 0.9553 |
| Listeria_monocytogenes_1639_v52                          | Listeria_monocytogenes_1639_v187 | 0.9352 |
| Listeria_monocytogenes_1639_v51                          | Listeria_monocytogenes_1639_v187 | 0.9327 |
| Listeria_monocytogenes_1639_v50                          | Listeria_monocytogenes_1639_v187 | 0.9481 |
| Listeria_monocytogenes_1639_v4                           | Listeria_monocytogenes_1639_v187 | 0.9144 |
| Listeria_monocytogenes_1639_v49                          | Listeria_monocytogenes_1639_v187 | 0.9317 |
| Listeria_monocytogenes_1639_v48                          | Listeria_monocytogenes_1639_v187 | 0.9489 |
| Listeria_monocytogenes_1639_v47                          | Listeria_monocytogenes_1639_v187 | 0.9493 |
| Listeria_monocytogenes_1639_v46                          | Listeria_monocytogenes_1639_v187 | 0.9561 |
| Listeria_monocytogenes_1639_v45                          | Listeria_monocytogenes_1639_v187 | 0.9397 |
| Listeria_monocytogenes_1639_v44                          | Listeria_monocytogenes_1639_v187 | 0.9497 |
| Listeria_monocytogenes_1639_v43                          | Listeria_monocytogenes_1639_v187 | 0.9497 |
| Listeria_monocytogenes_1639_v42                          | Listeria_monocytogenes_1639_v187 | 0.9413 |
| Listeria_monocytogenes_1639_v41                          | Listeria_monocytogenes_1639_v187 | 0.9316 |
| Listeria_monocytogenes_1639_v40                          | Listeria_monocytogenes_1639_v187 | 0.9536 |
| Listeria_monocytogenes_1639_v3                           | Listeria_monocytogenes_1639_v187 | 0.9148 |
| Listeria_monocytogenes_1639_v39                          | Listeria_monocytogenes_1639_v187 | 0.9369 |
| Listeria_monocytogenes_1639_v38                          | Listeria_monocytogenes_1639_v187 | 0.9507 |
| Listeria_monocytogenes_1639_v37                          | Listeria_monocytogenes_1639_v187 | 0.9468 |
| Listeria_monocytogenes_1639_v36                          | Listeria_monocytogenes_1639_v187 | 0.9491 |
| Listeria_monocytogenes_1639_v35                          | Listeria_monocytogenes_1639_v187 | 0.9543 |
| Listeria_monocytogenes_1639_v34                          | Listeria_monocytogenes_1639_v187 | 0.9481 |
| Listeria_monocytogenes_1639_v33                          | Listeria_monocytogenes_1639_v187 | 0.9359 |
| Listeria_monocytogenes_1639_v32                          | Listeria_monocytogenes_1639_v187 | 0.9453 |
| Listeria_monocytogenes_1639_v31                          | Listeria_monocytogenes_1639_v187 | 0.9485 |
| Listeria_monocytogenes_1639_v30                          | Listeria_monocytogenes_1639_v187 | 0.9373 |
| Listeria_monocytogenes_1639_v2                           | Listeria_monocytogenes_1639_v187 | 0.9032 |
| Listeria_monocytogenes_1639_v29                          | Listeria_monocytogenes_1639_v187 | 0.94   |
| Listeria_monocytogenes_1639_v28                          | Listeria_monocytogenes_1639_v187 | 0.9446 |
| Listeria_monocytogenes_1639_v27                          | Listeria_monocytogenes_1639_v187 | 0.9351 |
| Listeria_monocytogenes_1639_v26                          | Listeria_monocytogenes_1639_v187 | 0.9344 |
| Listeria_monocytogenes_1639_v25                          | Listeria_monocytogenes_1639_v187 | 0.9344 |
| Listeria_monocytogenes_1639_v24                          | Listeria_monocytogenes_1639_v187 | 0.9288 |
| Listeria_monocytogenes_1639_v23                          | Listeria_monocytogenes_1639_v187 | 0.9284 |
| Listeria_monocytogenes_1639_v22                          | Listeria_monocytogenes_1639_v187 | 0.9369 |
| Listeria_monocytogenes_1639_v21                          | Listeria_monocytogenes_1639_v187 | 0.9288 |
| Listeria_monocytogenes_1639_v20                          | Listeria_monocytogenes_1639_v187 | 0.9329 |
| Listeria_monocytogenes_1639_v1                           | Listeria_monocytogenes_1639_v187 | 0.9327 |
| Listeria_monocytogenes_1639_v19                          | Listeria_monocytogenes_1639_v187 | 0.9325 |
| Listeria_monocytogenes_1639_v198                         | Listeria_monocytogenes_1639_v187 | 0.92   |
| Listeria_monocytogenes_1639_v197                         | Listeria_monocytogenes_1639_v187 | 0.9491 |
| Listeria_monocytogenes_1639_v196                         | Listeria_monocytogenes_1639_v187 | 0.9694 |
| Listeria_monocytogenes_1639_v195                         | Listeria_monocytogenes_1639_v187 | 0.9579 |
| Listeria_monocytogenes_1639_v194                         | Listeria_monocytogenes_1639_v187 | 0.9556 |
| Listeria_monocytogenes_1639_v193                         | Listeria_monocytogenes_1639_v187 | 0.956  |
| Listeria_monocytogenes_1639_v192                         | Listeria_monocytogenes_1639_v187 | 0.9118 |
| Listeria_monocytogenes_1639_v191                         | Listeria_monocytogenes_1639_v187 | 0.9824 |
| Listeria_monocytogenes_1639_v190                         | Listeria_monocytogenes_1639_v187 | 0.9992 |
| Listeria_monocytogenes_1639_v18                          | Listeria_monocytogenes_1639_v187 | 0.9245 |
| Listeria_monocytogenes_1639_v189                         | Listeria_monocytogenes_1639_v187 | 0.9984 |
| Listeria_monocytogenes_1639_v188                         | Listeria_monocytogenes_1639_v187 | 0.9773 |
| Listeria_monocytogenes_1639_v187                         | Listeria_monocytogenes_1639_v187 | 0.0661 |
| Listeria_welshimeri_1643                                 | Listeria_monocytogenes_1639_v188 | 0.8785 |
| Listeria_welshimeri_serovar_6b_str_SLCC5334_386043       | Listeria_monocytogenes_1639_v188 | 0.8778 |
| Listeria_seeligeri_serovar_1_2b_str_SLCC3954_683837      | Listeria_monocytogenes_1639_v188 | 0.8948 |
| Listeria_seeligeri_FSL_S4-171_702452                     | Listeria_monocytogenes_1639_v188 | 0.8269 |
| Listeria_seeligeri_FSL_N1-067_702453                     | Listeria_monocytogenes_1639_v188 | 0.8357 |
| Listeria_seeligeri_1640_v1                               | Listeria_monocytogenes_1639_v188 | 0.8912 |
| Listeria_seeligeri_1640                                  | Listeria_monocytogenes_1639_v188 | 0.8842 |
| Listeria_monocytogenes_WSLC1042_1457188                  | Listeria_monocytogenes_1639_v188 | 0.9425 |
| Listeria_monocytogenes_WSLC1001_1457187                  | Listeria_monocytogenes_1639_v188 | 0.9592 |
| Listeria_monocytogenes_SLCC7179_879090                   | Listeria_monocytogenes_1639_v188 | 0.9674 |
| Listeria_monocytogenes_SLCC5850_882096                   | Listeria_monocytogenes_1639_v188 | 0.9637 |
| Listeria_monocytogenes_SLCC2755_932919                   | Listeria_monocytogenes_1639_v188 | 0.9445 |
| Listeria_monocytogenes_SLCC2540_879089                   | Listeria_monocytogenes_1639_v188 | 0.945  |
| Listeria_monocytogenes_SLCC2479_882020                   | Listeria_monocytogenes_1639_v188 | 0.9565 |
| Listeria_monocytogenes_SLCC2378_879088                   | Listeria_monocytogenes_1639_v188 | 0.944  |
| Listeria_monocytogenes_SLCC2376_882097                   | Listeria_monocytogenes_1639_v188 | 0.9571 |
| Listeria_monocytogenes_SLCC2372_932920                   | Listeria_monocytogenes_1639_v188 | 0.9489 |
| Listeria_monocytogenes_serotype_4b_str_LL195_1230340     | Listeria_monocytogenes_1639_v188 | 0.9502 |
| Listeria_monocytogenes_serotype_4b_str_LIS0087_1134669   | Listeria_monocytogenes_1639_v188 | 0.94   |
| Listeria_monocytogenes_serotype_4b_str_F2365_265669      | Listeria_monocytogenes_1639_v188 | 0.9502 |
| Listeria_monocytogenes_serotype_4b_str_CLIP_80459_568819 | Listeria_monocytogenes_1639_v188 | 0.9583 |
| Listeria_monocytogenes_serotype_4b_str_81-0861_1196161   | Listeria_monocytogenes_1639_v188 | 0.9327 |
| Listeria_monocytogenes_serotype_4b_str_81-0592_1196160   | Listeria_monocytogenes_1639_v188 | 0.9338 |
| Listeria_monocytogenes_serotype_4b_str_81-0558_1196159   | Listeria_monocytogenes_1639_v188 | 0.9346 |
| Listeria_monocytogenes_serotype_4b_str_10-0809_1196162   | Listeria_monocytogenes_1639_v188 | 0.9338 |
| Listeria_monocytogenes_serotype_4b_str_02-6680_1196175   | Listeria_monocytogenes_1639_v188 | 0.9538 |
| Listeria_monocytogenes_serotype_4b_str_02-6679_1196174   | Listeria_monocytogenes_1639_v188 | 0.9538 |
| Listeria_monocytogenes_serotype_4b_str_02-1792_1196173   | Listeria_monocytogenes_1639_v188 | 0.9342 |
| Listeria_monocytogenes_serotype_4b_str_02-1289_1196172   | Listeria_monocytogenes_1639_v188 | 0.9342 |
| Listeria_monocytogenes_serotype_4b_str_02-1103_1196171   | Listeria_monocytogenes_1639_v188 | 0.9342 |
| Listeria_monocytogenes_serotype_3c_str_10-5027_1196195   | Listeria_monocytogenes_1639_v188 | 0.9557 |
| Listeria_monocytogenes_serotype_1_2c_str_10-5026_1196194 | Listeria_monocytogenes_1639_v188 | 0.9569 |
| Listeria_monocytogenes_serotype_1_2c_str_10-5025_1196193 | Listeria_monocytogenes_1639_v188 | 0.9569 |
| Listeria_monocytogenes_serotype_1_2b_str_10-0811_1196164 | Listeria_monocytogenes_1639_v188 | 0.9369 |
| Listeria_monocytogenes_serotype_1_2b_str_10-0810_1196163 | Listeria_monocytogenes_1639_v188 | 0.9369 |
| Listeria_monocytogenes_serotype_1_2a_str_99-6370_1196179 | Listeria_monocytogenes_1639_v188 | 0.9386 |
| Listeria_monocytogenes_serotype_1_2a_str_98-2035_1196178 | Listeria_monocytogenes_1639_v188 | 0.9386 |
| Listeria_monocytogenes_serotype_1_2a_str_95-0093_1196177 | Listeria_monocytogenes_1639_v188 | 0.9447 |
| Listeria_monocytogenes_serotype_1_2a_str_88-0478_1196176 | Listeria_monocytogenes_1639_v188 | 0.9439 |

|                                                          |                                  |        |
|----------------------------------------------------------|----------------------------------|--------|
| Listeria_monocytogenes_serotype_1_2a_str_10-5024_1196192 | Listeria_monocytogenes_1639_v188 | 0.945  |
| Listeria_monocytogenes_serotype_1_2a_str_10-4758_1196168 | Listeria_monocytogenes_1639_v188 | 0.963  |
| Listeria_monocytogenes_serotype_1_2a_str_10-4754_1196167 | Listeria_monocytogenes_1639_v188 | 0.963  |
| Listeria_monocytogenes_serotype_1_2a_str_10-1321_1196191 | Listeria_monocytogenes_1639_v188 | 0.945  |
| Listeria_monocytogenes_serotype_1_2a_str_10-1047_1196190 | Listeria_monocytogenes_1639_v188 | 0.9454 |
| Listeria_monocytogenes_serotype_1_2a_str_10-1046_1196189 | Listeria_monocytogenes_1639_v188 | 0.9454 |
| Listeria_monocytogenes_serotype_1_2a_str_10-0934_1196170 | Listeria_monocytogenes_1639_v188 | 0.9742 |
| Listeria_monocytogenes_serotype_1_2a_str_10-0933_1196169 | Listeria_monocytogenes_1639_v188 | 0.9742 |
| Listeria_monocytogenes_serotype_1_2a_str_10-0815_1196188 | Listeria_monocytogenes_1639_v188 | 0.94   |
| Listeria_monocytogenes_serotype_1_2a_str_10-0814_1196187 | Listeria_monocytogenes_1639_v188 | 0.9447 |
| Listeria_monocytogenes_serotype_1_2a_str_10-0813_1196166 | Listeria_monocytogenes_1639_v188 | 0.9563 |
| Listeria_monocytogenes_serotype_1_2a_str_10-0812_1196165 | Listeria_monocytogenes_1639_v188 | 0.9563 |
| Listeria_monocytogenes_serotype_1_2a_str_08-7669_1196186 | Listeria_monocytogenes_1639_v188 | 0.9548 |
| Listeria_monocytogenes_serotype_1_2a_str_08-7374_1196185 | Listeria_monocytogenes_1639_v188 | 0.945  |
| Listeria_monocytogenes_serotype_1_2a_str_08-6997_1196184 | Listeria_monocytogenes_1639_v188 | 0.94   |
| Listeria_monocytogenes_serotype_1_2a_str_08-6569_1196183 | Listeria_monocytogenes_1639_v188 | 0.94   |
| Listeria_monocytogenes_serotype_1_2a_str_08-6056_1196182 | Listeria_monocytogenes_1639_v188 | 0.94   |
| Listeria_monocytogenes_serotype_1_2a_str_04-5457_1196181 | Listeria_monocytogenes_1639_v188 | 0.945  |
| Listeria_monocytogenes_serotype_1_2a_str_02-5993_1196180 | Listeria_monocytogenes_1639_v188 | 0.9447 |
| Listeria_monocytogenes_R479a_1437838                     | Listeria_monocytogenes_1639_v188 | 0.9439 |
| Listeria_monocytogenes_N53-1_1234142                     | Listeria_monocytogenes_1639_v188 | 0.9182 |
| Listeria_monocytogenes_M7_1030009                        | Listeria_monocytogenes_1639_v188 | 0.9133 |
| Listeria_monocytogenes_LO28_393132                       | Listeria_monocytogenes_1639_v188 | 0.955  |
| Listeria_monocytogenes_L99_563174                        | Listeria_monocytogenes_1639_v188 | 0.914  |
| Listeria_monocytogenes_L312_882094                       | Listeria_monocytogenes_1639_v188 | 0.9583 |
| Listeria_monocytogenes_J1816_930781                      | Listeria_monocytogenes_1639_v188 | 0.9341 |
| Listeria_monocytogenes_J1-220_930782                     | Listeria_monocytogenes_1639_v188 | 0.9298 |
| Listeria_monocytogenes_J0161_393130                      | Listeria_monocytogenes_1639_v188 | 0.9573 |
| Listeria_monocytogenes_HCC23_552536                      | Listeria_monocytogenes_1639_v188 | 0.9137 |
| Listeria_monocytogenes_FSL_R2-561_393126                 | Listeria_monocytogenes_1639_v188 | 0.955  |
| Listeria_monocytogenes_FSL_J1-208_393119                 | Listeria_monocytogenes_1639_v188 | 0.9189 |
| Listeria_monocytogenes_FSL_J1-175_393118                 | Listeria_monocytogenes_1639_v188 | 0.9479 |
| Listeria_monocytogenes_Finland_1998_393127               | Listeria_monocytogenes_1639_v188 | 0.9746 |
| Listeria_monocytogenes_EGD-e_169963_v1                   | Listeria_monocytogenes_1639_v188 | 0.965  |
| Listeria_monocytogenes_EGD-e_169963                      | Listeria_monocytogenes_1639_v188 | 0.965  |
| Listeria_monocytogenes_EGD_1334565                       | Listeria_monocytogenes_1639_v188 | 0.9645 |
| Listeria_monocytogenes_CFSAN002349_1299895               | Listeria_monocytogenes_1639_v188 | 0.9534 |
| Listeria_monocytogenes_ATCC_19117_882095_v1              | Listeria_monocytogenes_1639_v188 | 0.95   |
| Listeria_monocytogenes_ATCC_19117_882095                 | Listeria_monocytogenes_1639_v188 | 0.95   |
| Listeria_monocytogenes_6179_1288295                      | Listeria_monocytogenes_1639_v188 | 0.9369 |
| Listeria_monocytogenes_1639_v9                           | Listeria_monocytogenes_1639_v188 | 0.9191 |
| Listeria_monocytogenes_1639_v99                          | Listeria_monocytogenes_1639_v188 | 0.9353 |
| Listeria_monocytogenes_1639_v98                          | Listeria_monocytogenes_1639_v188 | 0.9721 |
| Listeria_monocytogenes_1639_v97                          | Listeria_monocytogenes_1639_v188 | 0.9428 |
| Listeria_monocytogenes_1639_v96                          | Listeria_monocytogenes_1639_v188 | 0.9342 |
| Listeria_monocytogenes_1639_v95                          | Listeria_monocytogenes_1639_v188 | 0.9342 |
| Listeria_monocytogenes_1639_v94                          | Listeria_monocytogenes_1639_v188 | 0.9346 |
| Listeria_monocytogenes_1639_v93                          | Listeria_monocytogenes_1639_v188 | 0.9458 |
| Listeria_monocytogenes_1639_v92                          | Listeria_monocytogenes_1639_v188 | 0.9349 |
| Listeria_monocytogenes_1639_v91                          | Listeria_monocytogenes_1639_v188 | 0.9314 |
| Listeria_monocytogenes_1639_v90                          | Listeria_monocytogenes_1639_v188 | 0.9721 |
| Listeria_monocytogenes_1639_v8                           | Listeria_monocytogenes_1639_v188 | 0.9333 |
| Listeria_monocytogenes_1639_v89                          | Listeria_monocytogenes_1639_v188 | 0.946  |
| Listeria_monocytogenes_1639_v88                          | Listeria_monocytogenes_1639_v188 | 0.9541 |
| Listeria_monocytogenes_1639_v87                          | Listeria_monocytogenes_1639_v188 | 0.9512 |
| Listeria_monocytogenes_1639_v86                          | Listeria_monocytogenes_1639_v188 | 0.9512 |
| Listeria_monocytogenes_1639_v85                          | Listeria_monocytogenes_1639_v188 | 0.9321 |
| Listeria_monocytogenes_1639_v84                          | Listeria_monocytogenes_1639_v188 | 0.957  |
| Listeria_monocytogenes_1639_v83                          | Listeria_monocytogenes_1639_v188 | 0.9387 |
| Listeria_monocytogenes_1639_v82                          | Listeria_monocytogenes_1639_v188 | 0.9384 |
| Listeria_monocytogenes_1639_v81                          | Listeria_monocytogenes_1639_v188 | 0.9544 |
| Listeria_monocytogenes_1639_v80                          | Listeria_monocytogenes_1639_v188 | 0.9421 |
| Listeria_monocytogenes_1639_v7                           | Listeria_monocytogenes_1639_v188 | 0.9333 |
| Listeria_monocytogenes_1639_v79                          | Listeria_monocytogenes_1639_v188 | 0.9523 |
| Listeria_monocytogenes_1639_v78                          | Listeria_monocytogenes_1639_v188 | 0.9537 |
| Listeria_monocytogenes_1639_v77                          | Listeria_monocytogenes_1639_v188 | 0.9524 |
| Listeria_monocytogenes_1639_v76                          | Listeria_monocytogenes_1639_v188 | 0.9461 |
| Listeria_monocytogenes_1639_v75                          | Listeria_monocytogenes_1639_v188 | 0.914  |
| Listeria_monocytogenes_1639_v74                          | Listeria_monocytogenes_1639_v188 | 0.9516 |
| Listeria_monocytogenes_1639_v73                          | Listeria_monocytogenes_1639_v188 | 0.95   |
| Listeria_monocytogenes_1639_v72                          | Listeria_monocytogenes_1639_v188 | 0.9375 |
| Listeria_monocytogenes_1639_v71                          | Listeria_monocytogenes_1639_v188 | 0.938  |
| Listeria_monocytogenes_1639_v70                          | Listeria_monocytogenes_1639_v188 | 0.9529 |
| Listeria_monocytogenes_1639_v6                           | Listeria_monocytogenes_1639_v188 | 0.9326 |
| Listeria_monocytogenes_1639_v69                          | Listeria_monocytogenes_1639_v188 | 0.9342 |
| Listeria_monocytogenes_1639_v68                          | Listeria_monocytogenes_1639_v188 | 0.9625 |
| Listeria_monocytogenes_1639_v67                          | Listeria_monocytogenes_1639_v188 | 0.9399 |
| Listeria_monocytogenes_1639_v66                          | Listeria_monocytogenes_1639_v188 | 0.9603 |
| Listeria_monocytogenes_1639_v65                          | Listeria_monocytogenes_1639_v188 | 0.9479 |
| Listeria_monocytogenes_1639_v64                          | Listeria_monocytogenes_1639_v188 | 0.9511 |
| Listeria_monocytogenes_1639_v63                          | Listeria_monocytogenes_1639_v188 | 0.938  |
| Listeria_monocytogenes_1639_v62                          | Listeria_monocytogenes_1639_v188 | 0.9501 |
| Listeria_monocytogenes_1639_v61                          | Listeria_monocytogenes_1639_v188 | 0.9479 |
| Listeria_monocytogenes_1639_v60                          | Listeria_monocytogenes_1639_v188 | 0.9594 |
| Listeria_monocytogenes_1639_v5                           | Listeria_monocytogenes_1639_v188 | 0.9023 |
| Listeria_monocytogenes_1639_v59                          | Listeria_monocytogenes_1639_v188 | 0.9394 |
| Listeria_monocytogenes_1639_v58                          | Listeria_monocytogenes_1639_v188 | 0.9364 |
| Listeria_monocytogenes_1639_v57                          | Listeria_monocytogenes_1639_v188 | 0.9303 |
| Listeria_monocytogenes_1639_v56                          | Listeria_monocytogenes_1639_v188 | 0.9395 |
| Listeria_monocytogenes_1639_v55                          | Listeria_monocytogenes_1639_v188 | 0.9271 |
| Listeria_monocytogenes_1639_v54                          | Listeria_monocytogenes_1639_v188 | 0.9317 |

|                                                          |                                  |        |
|----------------------------------------------------------|----------------------------------|--------|
| Listeria_monocytogenes_1639_v53                          | Listeria_monocytogenes_1639_v188 | 0.9552 |
| Listeria_monocytogenes_1639_v52                          | Listeria_monocytogenes_1639_v188 | 0.9362 |
| Listeria_monocytogenes_1639_v51                          | Listeria_monocytogenes_1639_v188 | 0.9341 |
| Listeria_monocytogenes_1639_v50                          | Listeria_monocytogenes_1639_v188 | 0.9435 |
| Listeria_monocytogenes_1639_v4                           | Listeria_monocytogenes_1639_v188 | 0.915  |
| Listeria_monocytogenes_1639_v49                          | Listeria_monocytogenes_1639_v188 | 0.9335 |
| Listeria_monocytogenes_1639_v48                          | Listeria_monocytogenes_1639_v188 | 0.9507 |
| Listeria_monocytogenes_1639_v47                          | Listeria_monocytogenes_1639_v188 | 0.9447 |
| Listeria_monocytogenes_1639_v46                          | Listeria_monocytogenes_1639_v188 | 0.9617 |
| Listeria_monocytogenes_1639_v45                          | Listeria_monocytogenes_1639_v188 | 0.9347 |
| Listeria_monocytogenes_1639_v44                          | Listeria_monocytogenes_1639_v188 | 0.945  |
| Listeria_monocytogenes_1639_v43                          | Listeria_monocytogenes_1639_v188 | 0.945  |
| Listeria_monocytogenes_1639_v42                          | Listeria_monocytogenes_1639_v188 | 0.9378 |
| Listeria_monocytogenes_1639_v41                          | Listeria_monocytogenes_1639_v188 | 0.927  |
| Listeria_monocytogenes_1639_v40                          | Listeria_monocytogenes_1639_v188 | 0.9554 |
| Listeria_monocytogenes_1639_v3                           | Listeria_monocytogenes_1639_v188 | 0.9154 |
| Listeria_monocytogenes_1639_v39                          | Listeria_monocytogenes_1639_v188 | 0.9349 |
| Listeria_monocytogenes_1639_v38                          | Listeria_monocytogenes_1639_v188 | 0.9521 |
| Listeria_monocytogenes_1639_v37                          | Listeria_monocytogenes_1639_v188 | 0.9471 |
| Listeria_monocytogenes_1639_v36                          | Listeria_monocytogenes_1639_v188 | 0.9442 |
| Listeria_monocytogenes_1639_v35                          | Listeria_monocytogenes_1639_v188 | 0.9557 |
| Listeria_monocytogenes_1639_v34                          | Listeria_monocytogenes_1639_v188 | 0.9537 |
| Listeria_monocytogenes_1639_v33                          | Listeria_monocytogenes_1639_v188 | 0.9369 |
| Listeria_monocytogenes_1639_v32                          | Listeria_monocytogenes_1639_v188 | 0.9456 |
| Listeria_monocytogenes_1639_v31                          | Listeria_monocytogenes_1639_v188 | 0.9541 |
| Listeria_monocytogenes_1639_v30                          | Listeria_monocytogenes_1639_v188 | 0.9387 |
| Listeria_monocytogenes_1639_v2                           | Listeria_monocytogenes_1639_v188 | 0.9027 |
| Listeria_monocytogenes_1639_v29                          | Listeria_monocytogenes_1639_v188 | 0.9414 |
| Listeria_monocytogenes_1639_v28                          | Listeria_monocytogenes_1639_v188 | 0.946  |
| Listeria_monocytogenes_1639_v27                          | Listeria_monocytogenes_1639_v188 | 0.9365 |
| Listeria_monocytogenes_1639_v26                          | Listeria_monocytogenes_1639_v188 | 0.9361 |
| Listeria_monocytogenes_1639_v25                          | Listeria_monocytogenes_1639_v188 | 0.9358 |
| Listeria_monocytogenes_1639_v24                          | Listeria_monocytogenes_1639_v188 | 0.9298 |
| Listeria_monocytogenes_1639_v23                          | Listeria_monocytogenes_1639_v188 | 0.9298 |
| Listeria_monocytogenes_1639_v22                          | Listeria_monocytogenes_1639_v188 | 0.9383 |
| Listeria_monocytogenes_1639_v21                          | Listeria_monocytogenes_1639_v188 | 0.9298 |
| Listeria_monocytogenes_1639_v20                          | Listeria_monocytogenes_1639_v188 | 0.932  |
| Listeria_monocytogenes_1639_v1                           | Listeria_monocytogenes_1639_v188 | 0.93   |
| Listeria_monocytogenes_1639_v19                          | Listeria_monocytogenes_1639_v188 | 0.9316 |
| Listeria_monocytogenes_1639_v198                         | Listeria_monocytogenes_1639_v188 | 0.9203 |
| Listeria_monocytogenes_1639_v197                         | Listeria_monocytogenes_1639_v188 | 0.9509 |
| Listeria_monocytogenes_1639_v196                         | Listeria_monocytogenes_1639_v188 | 0.9477 |
| Listeria_monocytogenes_1639_v195                         | Listeria_monocytogenes_1639_v188 | 0.9598 |
| Listeria_monocytogenes_1639_v194                         | Listeria_monocytogenes_1639_v188 | 0.9575 |
| Listeria_monocytogenes_1639_v193                         | Listeria_monocytogenes_1639_v188 | 0.9579 |
| Listeria_monocytogenes_1639_v192                         | Listeria_monocytogenes_1639_v188 | 0.9125 |
| Listeria_monocytogenes_1639_v191                         | Listeria_monocytogenes_1639_v188 | 0.9777 |
| Listeria_monocytogenes_1639_v190                         | Listeria_monocytogenes_1639_v188 | 0.9773 |
| Listeria_monocytogenes_1639_v18                          | Listeria_monocytogenes_1639_v188 | 0.9247 |
| Listeria_monocytogenes_1639_v189                         | Listeria_monocytogenes_1639_v188 | 0.9769 |
| Listeria_monocytogenes_1639_v188                         | Listeria_monocytogenes_1639_v188 | 0.0655 |
| Listeria_welshimeri_1643                                 | Listeria_monocytogenes_1639_v189 | 0.8826 |
| Listeria_welshimeri_serovar_6b_str_SLCC5334_386043       | Listeria_monocytogenes_1639_v189 | 0.8819 |
| Listeria_seeligeri_serovar_1_2b_str_SLCC3954_683837      | Listeria_monocytogenes_1639_v189 | 0.8943 |
| Listeria_seeligeri_FSL_S4-171_702452                     | Listeria_monocytogenes_1639_v189 | 0.8262 |
| Listeria_seeligeri_FSL_N1-067_702453                     | Listeria_monocytogenes_1639_v189 | 0.8353 |
| Listeria_seeligeri_1640_v1                               | Listeria_monocytogenes_1639_v189 | 0.8926 |
| Listeria_seeligeri_1640                                  | Listeria_monocytogenes_1639_v189 | 0.8833 |
| Listeria_monocytogenes_WSLC1042_1457188                  | Listeria_monocytogenes_1639_v189 | 0.9403 |
| Listeria_monocytogenes_WSLC1001_1457187                  | Listeria_monocytogenes_1639_v189 | 0.9812 |
| Listeria_monocytogenes_SLCC7179_879090                   | Listeria_monocytogenes_1639_v189 | 0.9694 |
| Listeria_monocytogenes_SLCC5850_882096                   | Listeria_monocytogenes_1639_v189 | 0.9861 |
| Listeria_monocytogenes_SLCC2755_932919                   | Listeria_monocytogenes_1639_v189 | 0.945  |
| Listeria_monocytogenes_SLCC2540_879089                   | Listeria_monocytogenes_1639_v189 | 0.9444 |
| Listeria_monocytogenes_SLCC2479_882020                   | Listeria_monocytogenes_1639_v189 | 0.9539 |
| Listeria_monocytogenes_SLCC2378_879088                   | Listeria_monocytogenes_1639_v189 | 0.9418 |
| Listeria_monocytogenes_SLCC2376_882097                   | Listeria_monocytogenes_1639_v189 | 0.9548 |
| Listeria_monocytogenes_SLCC2372_932920                   | Listeria_monocytogenes_1639_v189 | 0.9464 |
| Listeria_monocytogenes_serotype_4b_str_LL195_1230340     | Listeria_monocytogenes_1639_v189 | 0.948  |
| Listeria_monocytogenes_serotype_4b_str_LIS0087_1134669   | Listeria_monocytogenes_1639_v189 | 0.9607 |
| Listeria_monocytogenes_serotype_4b_str_F2365_265669      | Listeria_monocytogenes_1639_v189 | 0.948  |
| Listeria_monocytogenes_serotype_4b_str_CLIP_80459_568819 | Listeria_monocytogenes_1639_v189 | 0.9545 |
| Listeria_monocytogenes_serotype_4b_str_81-0861_1196161   | Listeria_monocytogenes_1639_v189 | 0.9302 |
| Listeria_monocytogenes_serotype_4b_str_81-0592_1196160   | Listeria_monocytogenes_1639_v189 | 0.9313 |
| Listeria_monocytogenes_serotype_4b_str_81-0558_1196159   | Listeria_monocytogenes_1639_v189 | 0.9324 |
| Listeria_monocytogenes_serotype_4b_str_10-0809_1196162   | Listeria_monocytogenes_1639_v189 | 0.9317 |
| Listeria_monocytogenes_serotype_4b_str_02-6680_1196175   | Listeria_monocytogenes_1639_v189 | 0.9531 |
| Listeria_monocytogenes_serotype_4b_str_02-6679_1196174   | Listeria_monocytogenes_1639_v189 | 0.9531 |
| Listeria_monocytogenes_serotype_4b_str_02-1792_1196173   | Listeria_monocytogenes_1639_v189 | 0.9321 |
| Listeria_monocytogenes_serotype_4b_str_02-1289_1196172   | Listeria_monocytogenes_1639_v189 | 0.9321 |
| Listeria_monocytogenes_serotype_4b_str_02-1103_1196171   | Listeria_monocytogenes_1639_v189 | 0.9321 |
| Listeria_monocytogenes_serotype_3c_str_10-5027_1196195   | Listeria_monocytogenes_1639_v189 | 0.9531 |
| Listeria_monocytogenes_serotype_1_2c_str_10-5026_1196194 | Listeria_monocytogenes_1639_v189 | 0.9543 |
| Listeria_monocytogenes_serotype_1_2c_str_10-5025_1196193 | Listeria_monocytogenes_1639_v189 | 0.9543 |
| Listeria_monocytogenes_serotype_1_2b_str_10-0811_1196164 | Listeria_monocytogenes_1639_v189 | 0.9348 |
| Listeria_monocytogenes_serotype_1_2b_str_10-0810_1196163 | Listeria_monocytogenes_1639_v189 | 0.9348 |
| Listeria_monocytogenes_serotype_1_2a_str_99-6370_1196179 | Listeria_monocytogenes_1639_v189 | 0.9429 |
| Listeria_monocytogenes_serotype_1_2a_str_98-2035_1196178 | Listeria_monocytogenes_1639_v189 | 0.9429 |
| Listeria_monocytogenes_serotype_1_2a_str_95-0093_1196177 | Listeria_monocytogenes_1639_v189 | 0.9489 |
| Listeria_monocytogenes_serotype_1_2a_str_88-0478_1196176 | Listeria_monocytogenes_1639_v189 | 0.9481 |
| Listeria_monocytogenes_serotype_1_2a_str_10-5024_1196192 | Listeria_monocytogenes_1639_v189 | 0.9493 |

|                                                          |                                  |        |
|----------------------------------------------------------|----------------------------------|--------|
| Listeria_monocytogenes_serotype_1_2a_str_10-4758_1196168 | Listeria_monocytogenes_1639_v189 | 0.9634 |
| Listeria_monocytogenes_serotype_1_2a_str_10-4754_1196167 | Listeria_monocytogenes_1639_v189 | 0.9634 |
| Listeria_monocytogenes_serotype_1_2a_str_10-1321_1196191 | Listeria_monocytogenes_1639_v189 | 0.9493 |
| Listeria_monocytogenes_serotype_1_2a_str_10-1047_1196190 | Listeria_monocytogenes_1639_v189 | 0.9497 |
| Listeria_monocytogenes_serotype_1_2a_str_10-1046_1196189 | Listeria_monocytogenes_1639_v189 | 0.9497 |
| Listeria_monocytogenes_serotype_1_2a_str_10-0934_1196170 | Listeria_monocytogenes_1639_v189 | 0.9852 |
| Listeria_monocytogenes_serotype_1_2a_str_10-0933_1196169 | Listeria_monocytogenes_1639_v189 | 0.9852 |
| Listeria_monocytogenes_serotype_1_2a_str_10-0815_1196188 | Listeria_monocytogenes_1639_v189 | 0.9443 |
| Listeria_monocytogenes_serotype_1_2a_str_10-0814_1196187 | Listeria_monocytogenes_1639_v189 | 0.9489 |
| Listeria_monocytogenes_serotype_1_2a_str_10-0813_1196166 | Listeria_monocytogenes_1639_v189 | 0.9767 |
| Listeria_monocytogenes_serotype_1_2a_str_10-0812_1196165 | Listeria_monocytogenes_1639_v189 | 0.9767 |
| Listeria_monocytogenes_serotype_1_2a_str_08-7669_1196186 | Listeria_monocytogenes_1639_v189 | 0.9591 |
| Listeria_monocytogenes_serotype_1_2a_str_08-7374_1196185 | Listeria_monocytogenes_1639_v189 | 0.9493 |
| Listeria_monocytogenes_serotype_1_2a_str_08-6997_1196184 | Listeria_monocytogenes_1639_v189 | 0.9443 |
| Listeria_monocytogenes_serotype_1_2a_str_08-6569_1196183 | Listeria_monocytogenes_1639_v189 | 0.9443 |
| Listeria_monocytogenes_serotype_1_2a_str_08-6056_1196182 | Listeria_monocytogenes_1639_v189 | 0.9443 |
| Listeria_monocytogenes_serotype_1_2a_str_04-5457_1196181 | Listeria_monocytogenes_1639_v189 | 0.9493 |
| Listeria_monocytogenes_serotype_1_2a_str_02-5993_1196180 | Listeria_monocytogenes_1639_v189 | 0.9489 |
| Listeria_monocytogenes_R479a_1437838                     | Listeria_monocytogenes_1639_v189 | 0.9478 |
| Listeria_monocytogenes_N53-1_1234142                     | Listeria_monocytogenes_1639_v189 | 0.918  |
| Listeria_monocytogenes_M7_1030009                        | Listeria_monocytogenes_1639_v189 | 0.9082 |
| Listeria_monocytogenes_LO28_393132                       | Listeria_monocytogenes_1639_v189 | 0.9525 |
| Listeria_monocytogenes_L99_563174                        | Listeria_monocytogenes_1639_v189 | 0.9089 |
| Listeria_monocytogenes_L312_882094                       | Listeria_monocytogenes_1639_v189 | 0.9545 |
| Listeria_monocytogenes_J1816_930781                      | Listeria_monocytogenes_1639_v189 | 0.9335 |
| Listeria_monocytogenes_J1-220_930782                     | Listeria_monocytogenes_1639_v189 | 0.9277 |
| Listeria_monocytogenes_J0161_393130                      | Listeria_monocytogenes_1639_v189 | 0.9532 |
| Listeria_monocytogenes_HCC23_552536                      | Listeria_monocytogenes_1639_v189 | 0.9086 |
| Listeria_monocytogenes_FSL_R2-561_393126                 | Listeria_monocytogenes_1639_v189 | 0.9525 |
| Listeria_monocytogenes_FSL_J1-208_393119                 | Listeria_monocytogenes_1639_v189 | 0.9187 |
| Listeria_monocytogenes_FSL_J1-175_393118                 | Listeria_monocytogenes_1639_v189 | 0.9488 |
| Listeria_monocytogenes_Finland_1998_393127               | Listeria_monocytogenes_1639_v189 | 0.9735 |
| Listeria_monocytogenes_EGD-e_169963_v1                   | Listeria_monocytogenes_1639_v189 | 0.9624 |
| Listeria_monocytogenes_EGD-e_169963                      | Listeria_monocytogenes_1639_v189 | 0.9624 |
| Listeria_monocytogenes_EGD_1334565                       | Listeria_monocytogenes_1639_v189 | 0.9873 |
| Listeria_monocytogenes_CFSAN002349_1299895               | Listeria_monocytogenes_1639_v189 | 0.9527 |
| Listeria_monocytogenes_ATCC_19117_882095_v1              | Listeria_monocytogenes_1639_v189 | 0.9478 |
| Listeria_monocytogenes_ATCC_19117_882095                 | Listeria_monocytogenes_1639_v189 | 0.9478 |
| Listeria_monocytogenes_6179_1288295                      | Listeria_monocytogenes_1639_v189 | 0.9389 |
| Listeria_monocytogenes_1639_v9                           | Listeria_monocytogenes_1639_v189 | 0.9196 |
| Listeria_monocytogenes_1639_v99                          | Listeria_monocytogenes_1639_v189 | 0.9343 |
| Listeria_monocytogenes_1639_v98                          | Listeria_monocytogenes_1639_v189 | 0.9509 |
| Listeria_monocytogenes_1639_v97                          | Listeria_monocytogenes_1639_v189 | 0.941  |
| Listeria_monocytogenes_1639_v96                          | Listeria_monocytogenes_1639_v189 | 0.9332 |
| Listeria_monocytogenes_1639_v95                          | Listeria_monocytogenes_1639_v189 | 0.9332 |
| Listeria_monocytogenes_1639_v94                          | Listeria_monocytogenes_1639_v189 | 0.9336 |
| Listeria_monocytogenes_1639_v93                          | Listeria_monocytogenes_1639_v189 | 0.9485 |
| Listeria_monocytogenes_1639_v92                          | Listeria_monocytogenes_1639_v189 | 0.9339 |
| Listeria_monocytogenes_1639_v91                          | Listeria_monocytogenes_1639_v189 | 0.9292 |
| Listeria_monocytogenes_1639_v90                          | Listeria_monocytogenes_1639_v189 | 0.9509 |
| Listeria_monocytogenes_1639_v8                           | Listeria_monocytogenes_1639_v189 | 0.9376 |
| Listeria_monocytogenes_1639_v89                          | Listeria_monocytogenes_1639_v189 | 0.9442 |
| Listeria_monocytogenes_1639_v88                          | Listeria_monocytogenes_1639_v189 | 0.9649 |
| Listeria_monocytogenes_1639_v87                          | Listeria_monocytogenes_1639_v189 | 0.9715 |
| Listeria_monocytogenes_1639_v86                          | Listeria_monocytogenes_1639_v189 | 0.9715 |
| Listeria_monocytogenes_1639_v85                          | Listeria_monocytogenes_1639_v189 | 0.9296 |
| Listeria_monocytogenes_1639_v84                          | Listeria_monocytogenes_1639_v189 | 0.9571 |
| Listeria_monocytogenes_1639_v83                          | Listeria_monocytogenes_1639_v189 | 0.9366 |
| Listeria_monocytogenes_1639_v82                          | Listeria_monocytogenes_1639_v189 | 0.9362 |
| Listeria_monocytogenes_1639_v81                          | Listeria_monocytogenes_1639_v189 | 0.953  |
| Listeria_monocytogenes_1639_v80                          | Listeria_monocytogenes_1639_v189 | 0.9395 |
| Listeria_monocytogenes_1639_v7                           | Listeria_monocytogenes_1639_v189 | 0.9376 |
| Listeria_monocytogenes_1639_v79                          | Listeria_monocytogenes_1639_v189 | 0.9508 |
| Listeria_monocytogenes_1639_v78                          | Listeria_monocytogenes_1639_v189 | 0.9523 |
| Listeria_monocytogenes_1639_v77                          | Listeria_monocytogenes_1639_v189 | 0.9571 |
| Listeria_monocytogenes_1639_v76                          | Listeria_monocytogenes_1639_v189 | 0.9466 |
| Listeria_monocytogenes_1639_v75                          | Listeria_monocytogenes_1639_v189 | 0.9089 |
| Listeria_monocytogenes_1639_v74                          | Listeria_monocytogenes_1639_v189 | 0.9711 |
| Listeria_monocytogenes_1639_v73                          | Listeria_monocytogenes_1639_v189 | 0.9474 |
| Listeria_monocytogenes_1639_v72                          | Listeria_monocytogenes_1639_v189 | 0.9353 |
| Listeria_monocytogenes_1639_v71                          | Listeria_monocytogenes_1639_v189 | 0.9385 |
| Listeria_monocytogenes_1639_v70                          | Listeria_monocytogenes_1639_v189 | 0.9503 |
| Listeria_monocytogenes_1639_v6                           | Listeria_monocytogenes_1639_v189 | 0.9369 |
| Listeria_monocytogenes_1639_v69                          | Listeria_monocytogenes_1639_v189 | 0.9317 |
| Listeria_monocytogenes_1639_v68                          | Listeria_monocytogenes_1639_v189 | 0.9564 |
| Listeria_monocytogenes_1639_v67                          | Listeria_monocytogenes_1639_v189 | 0.9408 |
| Listeria_monocytogenes_1639_v66                          | Listeria_monocytogenes_1639_v189 | 0.9616 |
| Listeria_monocytogenes_1639_v65                          | Listeria_monocytogenes_1639_v189 | 0.9518 |
| Listeria_monocytogenes_1639_v64                          | Listeria_monocytogenes_1639_v189 | 0.9539 |
| Listeria_monocytogenes_1639_v63                          | Listeria_monocytogenes_1639_v189 | 0.9358 |
| Listeria_monocytogenes_1639_v62                          | Listeria_monocytogenes_1639_v189 | 0.9487 |
| Listeria_monocytogenes_1639_v61                          | Listeria_monocytogenes_1639_v189 | 0.9518 |
| Listeria_monocytogenes_1639_v60                          | Listeria_monocytogenes_1639_v189 | 0.9557 |
| Listeria_monocytogenes_1639_v5                           | Listeria_monocytogenes_1639_v189 | 0.9004 |
| Listeria_monocytogenes_1639_v59                          | Listeria_monocytogenes_1639_v189 | 0.9373 |
| Listeria_monocytogenes_1639_v58                          | Listeria_monocytogenes_1639_v189 | 0.9369 |
| Listeria_monocytogenes_1639_v57                          | Listeria_monocytogenes_1639_v189 | 0.9297 |
| Listeria_monocytogenes_1639_v56                          | Listeria_monocytogenes_1639_v189 | 0.9373 |
| Listeria_monocytogenes_1639_v55                          | Listeria_monocytogenes_1639_v189 | 0.9262 |
| Listeria_monocytogenes_1639_v54                          | Listeria_monocytogenes_1639_v189 | 0.9326 |
| Listeria_monocytogenes_1639_v53                          | Listeria_monocytogenes_1639_v189 | 0.9545 |

|                                                          |                                  |        |
|----------------------------------------------------------|----------------------------------|--------|
| Listeria_monocytogenes_1639_v52                          | Listeria_monocytogenes_1639_v189 | 0.9341 |
| Listeria_monocytogenes_1639_v51                          | Listeria_monocytogenes_1639_v189 | 0.932  |
| Listeria_monocytogenes_1639_v50                          | Listeria_monocytogenes_1639_v189 | 0.9478 |
| Listeria_monocytogenes_1639_v4                           | Listeria_monocytogenes_1639_v189 | 0.9133 |
| Listeria_monocytogenes_1639_v49                          | Listeria_monocytogenes_1639_v189 | 0.9314 |
| Listeria_monocytogenes_1639_v48                          | Listeria_monocytogenes_1639_v189 | 0.9481 |
| Listeria_monocytogenes_1639_v47                          | Listeria_monocytogenes_1639_v189 | 0.9489 |
| Listeria_monocytogenes_1639_v46                          | Listeria_monocytogenes_1639_v189 | 0.9557 |
| Listeria_monocytogenes_1639_v45                          | Listeria_monocytogenes_1639_v189 | 0.939  |
| Listeria_monocytogenes_1639_v44                          | Listeria_monocytogenes_1639_v189 | 0.9493 |
| Listeria_monocytogenes_1639_v43                          | Listeria_monocytogenes_1639_v189 | 0.9493 |
| Listeria_monocytogenes_1639_v42                          | Listeria_monocytogenes_1639_v189 | 0.9406 |
| Listeria_monocytogenes_1639_v41                          | Listeria_monocytogenes_1639_v189 | 0.9312 |
| Listeria_monocytogenes_1639_v40                          | Listeria_monocytogenes_1639_v189 | 0.9528 |
| Listeria_monocytogenes_1639_v3                           | Listeria_monocytogenes_1639_v189 | 0.9137 |
| Listeria_monocytogenes_1639_v39                          | Listeria_monocytogenes_1639_v189 | 0.9358 |
| Listeria_monocytogenes_1639_v38                          | Listeria_monocytogenes_1639_v189 | 0.9499 |
| Listeria_monocytogenes_1639_v37                          | Listeria_monocytogenes_1639_v189 | 0.9464 |
| Listeria_monocytogenes_1639_v36                          | Listeria_monocytogenes_1639_v189 | 0.9484 |
| Listeria_monocytogenes_1639_v35                          | Listeria_monocytogenes_1639_v189 | 0.9535 |
| Listeria_monocytogenes_1639_v34                          | Listeria_monocytogenes_1639_v189 | 0.9477 |
| Listeria_monocytogenes_1639_v33                          | Listeria_monocytogenes_1639_v189 | 0.9348 |
| Listeria_monocytogenes_1639_v32                          | Listeria_monocytogenes_1639_v189 | 0.945  |
| Listeria_monocytogenes_1639_v31                          | Listeria_monocytogenes_1639_v189 | 0.9481 |
| Listeria_monocytogenes_1639_v30                          | Listeria_monocytogenes_1639_v189 | 0.9366 |
| Listeria_monocytogenes_1639_v2                           | Listeria_monocytogenes_1639_v189 | 0.9029 |
| Listeria_monocytogenes_1639_v29                          | Listeria_monocytogenes_1639_v189 | 0.9393 |
| Listeria_monocytogenes_1639_v28                          | Listeria_monocytogenes_1639_v189 | 0.9439 |
| Listeria_monocytogenes_1639_v27                          | Listeria_monocytogenes_1639_v189 | 0.9344 |
| Listeria_monocytogenes_1639_v26                          | Listeria_monocytogenes_1639_v189 | 0.934  |
| Listeria_monocytogenes_1639_v25                          | Listeria_monocytogenes_1639_v189 | 0.9337 |
| Listeria_monocytogenes_1639_v24                          | Listeria_monocytogenes_1639_v189 | 0.9277 |
| Listeria_monocytogenes_1639_v23                          | Listeria_monocytogenes_1639_v189 | 0.9277 |
| Listeria_monocytogenes_1639_v22                          | Listeria_monocytogenes_1639_v189 | 0.9362 |
| Listeria_monocytogenes_1639_v21                          | Listeria_monocytogenes_1639_v189 | 0.9277 |
| Listeria_monocytogenes_1639_v20                          | Listeria_monocytogenes_1639_v189 | 0.9322 |
| Listeria_monocytogenes_1639_v1                           | Listeria_monocytogenes_1639_v189 | 0.932  |
| Listeria_monocytogenes_1639_v19                          | Listeria_monocytogenes_1639_v189 | 0.9318 |
| Listeria_monocytogenes_1639_v198                         | Listeria_monocytogenes_1639_v189 | 0.9201 |
| Listeria_monocytogenes_1639_v197                         | Listeria_monocytogenes_1639_v189 | 0.9491 |
| Listeria_monocytogenes_1639_v196                         | Listeria_monocytogenes_1639_v189 | 0.9706 |
| Listeria_monocytogenes_1639_v195                         | Listeria_monocytogenes_1639_v189 | 0.9572 |
| Listeria_monocytogenes_1639_v194                         | Listeria_monocytogenes_1639_v189 | 0.9552 |
| Listeria_monocytogenes_1639_v193                         | Listeria_monocytogenes_1639_v189 | 0.9556 |
| Listeria_monocytogenes_1639_v192                         | Listeria_monocytogenes_1639_v189 | 0.9111 |
| Listeria_monocytogenes_1639_v191                         | Listeria_monocytogenes_1639_v189 | 0.982  |
| Listeria_monocytogenes_1639_v190                         | Listeria_monocytogenes_1639_v189 | 0.9984 |
| Listeria_monocytogenes_1639_v18                          | Listeria_monocytogenes_1639_v189 | 0.9237 |
| Listeria_monocytogenes_1639_v189                         | Listeria_monocytogenes_1639_v189 | 0.0683 |
| Listeria_welshimeri_1643                                 | Listeria_monocytogenes_1639_v18  | 0.859  |
| Listeria_welshimeri_serovar_6b_str_SLCC5334_386043       | Listeria_monocytogenes_1639_v18  | 0.8584 |
| Listeria_seeligeri_serovar_1_2b_str_SLCC3954_683837      | Listeria_monocytogenes_1639_v18  | 0.8651 |
| Listeria_seeligeri_FSL_S4-171_702452                     | Listeria_monocytogenes_1639_v18  | 0.8191 |
| Listeria_seeligeri_FSL_N1-067_702453                     | Listeria_monocytogenes_1639_v18  | 0.8229 |
| Listeria_seeligeri_1640_v1                               | Listeria_monocytogenes_1639_v18  | 0.8708 |
| Listeria_seeligeri_1640                                  | Listeria_monocytogenes_1639_v18  | 0.8947 |
| Listeria_monocytogenes_WSLC1042_1457188                  | Listeria_monocytogenes_1639_v18  | 0.9396 |
| Listeria_monocytogenes_WSLC1001_1457187                  | Listeria_monocytogenes_1639_v18  | 0.9132 |
| Listeria_monocytogenes_SLCC7179_879090                   | Listeria_monocytogenes_1639_v18  | 0.9236 |
| Listeria_monocytogenes_SLCC5850_882096                   | Listeria_monocytogenes_1639_v18  | 0.9169 |
| Listeria_monocytogenes_SLCC2755_932919                   | Listeria_monocytogenes_1639_v18  | 0.9231 |
| Listeria_monocytogenes_SLCC2540_879089                   | Listeria_monocytogenes_1639_v18  | 0.9261 |
| Listeria_monocytogenes_SLCC2479_882020                   | Listeria_monocytogenes_1639_v18  | 0.9179 |
| Listeria_monocytogenes_SLCC2378_879088                   | Listeria_monocytogenes_1639_v18  | 0.941  |
| Listeria_monocytogenes_SLCC2376_882097                   | Listeria_monocytogenes_1639_v18  | 0.9184 |
| Listeria_monocytogenes_SLCC2372_932920                   | Listeria_monocytogenes_1639_v18  | 0.9108 |
| Listeria_monocytogenes_serotype_4b_str_LL195_1230340     | Listeria_monocytogenes_1639_v18  | 0.9462 |
| Listeria_monocytogenes_serotype_4b_str_LIS0087_1134669   | Listeria_monocytogenes_1639_v18  | 0.905  |
| Listeria_monocytogenes_serotype_4b_str_F2365_265669      | Listeria_monocytogenes_1639_v18  | 0.9462 |
| Listeria_monocytogenes_serotype_4b_str_CLIP_80459_568819 | Listeria_monocytogenes_1639_v18  | 0.9476 |
| Listeria_monocytogenes_serotype_4b_str_81-0861_1196161   | Listeria_monocytogenes_1639_v18  | 0.9446 |
| Listeria_monocytogenes_serotype_4b_str_81-0592_1196160   | Listeria_monocytogenes_1639_v18  | 0.946  |
| Listeria_monocytogenes_serotype_4b_str_81-0558_1196159   | Listeria_monocytogenes_1639_v18  | 0.9456 |
| Listeria_monocytogenes_serotype_4b_str_10-0809_1196162   | Listeria_monocytogenes_1639_v18  | 0.946  |
| Listeria_monocytogenes_serotype_4b_str_02-6680_1196175   | Listeria_monocytogenes_1639_v18  | 0.9448 |
| Listeria_monocytogenes_serotype_4b_str_02-6679_1196174   | Listeria_monocytogenes_1639_v18  | 0.9448 |
| Listeria_monocytogenes_serotype_4b_str_02-1792_1196173   | Listeria_monocytogenes_1639_v18  | 0.9467 |
| Listeria_monocytogenes_serotype_4b_str_02-1289_1196172   | Listeria_monocytogenes_1639_v18  | 0.9467 |
| Listeria_monocytogenes_serotype_4b_str_02-1103_1196171   | Listeria_monocytogenes_1639_v18  | 0.9467 |
| Listeria_monocytogenes_serotype_3c_str_10-5027_1196195   | Listeria_monocytogenes_1639_v18  | 0.9193 |
| Listeria_monocytogenes_serotype_1_2c_str_10-5026_1196194 | Listeria_monocytogenes_1639_v18  | 0.92   |
| Listeria_monocytogenes_serotype_1_2c_str_10-5025_1196193 | Listeria_monocytogenes_1639_v18  | 0.92   |
| Listeria_monocytogenes_serotype_1_2b_str_10-0811_1196164 | Listeria_monocytogenes_1639_v18  | 0.9339 |
| Listeria_monocytogenes_serotype_1_2b_str_10-0810_1196163 | Listeria_monocytogenes_1639_v18  | 0.9339 |
| Listeria_monocytogenes_serotype_1_2a_str_99-6370_1196179 | Listeria_monocytogenes_1639_v18  | 0.9088 |
| Listeria_monocytogenes_serotype_1_2a_str_98-2035_1196178 | Listeria_monocytogenes_1639_v18  | 0.9088 |
| Listeria_monocytogenes_serotype_1_2a_str_95-0093_1196177 | Listeria_monocytogenes_1639_v18  | 0.9129 |
| Listeria_monocytogenes_serotype_1_2a_str_88-0478_1196176 | Listeria_monocytogenes_1639_v18  | 0.9125 |
| Listeria_monocytogenes_serotype_1_2a_str_10-5024_1196192 | Listeria_monocytogenes_1639_v18  | 0.9133 |
| Listeria_monocytogenes_serotype_1_2a_str_10-4758_1196168 | Listeria_monocytogenes_1639_v18  | 0.917  |
| Listeria_monocytogenes_serotype_1_2a_str_10-4754_1196167 | Listeria_monocytogenes_1639_v18  | 0.9167 |



|                                                          |                                 |        |
|----------------------------------------------------------|---------------------------------|--------|
| Listeria_monocytogenes_serotype_1_2a_str_10-1321_1196191 | Listeria_monocytogenes_1639_v18 | 0.9133 |
| Listeria_monocytogenes_serotype_1_2a_str_10-1047_1196190 | Listeria_monocytogenes_1639_v18 | 0.9136 |
| Listeria_monocytogenes_serotype_1_2a_str_10-1046_1196189 | Listeria_monocytogenes_1639_v18 | 0.9136 |
| Listeria_monocytogenes_serotype_1_2a_str_10-0934_1196170 | Listeria_monocytogenes_1639_v18 | 0.9235 |
| Listeria_monocytogenes_serotype_1_2a_str_10-0933_1196169 | Listeria_monocytogenes_1639_v18 | 0.9235 |
| Listeria_monocytogenes_serotype_1_2a_str_10-0815_1196188 | Listeria_monocytogenes_1639_v18 | 0.9094 |
| Listeria_monocytogenes_serotype_1_2a_str_10-0814_1196187 | Listeria_monocytogenes_1639_v18 | 0.9133 |
| Listeria_monocytogenes_serotype_1_2a_str_10-0813_1196166 | Listeria_monocytogenes_1639_v18 | 0.9205 |
| Listeria_monocytogenes_serotype_1_2a_str_10-0812_1196165 | Listeria_monocytogenes_1639_v18 | 0.9205 |
| Listeria_monocytogenes_serotype_1_2a_str_08-7669_1196186 | Listeria_monocytogenes_1639_v18 | 0.9205 |
| Listeria_monocytogenes_serotype_1_2a_str_08-7374_1196185 | Listeria_monocytogenes_1639_v18 | 0.9133 |
| Listeria_monocytogenes_serotype_1_2a_str_08-6997_1196184 | Listeria_monocytogenes_1639_v18 | 0.9094 |
| Listeria_monocytogenes_serotype_1_2a_str_08-6569_1196183 | Listeria_monocytogenes_1639_v18 | 0.9094 |
| Listeria_monocytogenes_serotype_1_2a_str_08-6056_1196182 | Listeria_monocytogenes_1639_v18 | 0.9094 |
| Listeria_monocytogenes_serotype_1_2a_str_04-5457_1196181 | Listeria_monocytogenes_1639_v18 | 0.9133 |
| Listeria_monocytogenes_serotype_1_2a_str_02-5993_1196180 | Listeria_monocytogenes_1639_v18 | 0.9129 |
| Listeria_monocytogenes_R479a_1437838                     | Listeria_monocytogenes_1639_v18 | 0.9115 |
| Listeria_monocytogenes_N53-1_1234142                     | Listeria_monocytogenes_1639_v18 | 0.8773 |
| Listeria_monocytogenes_M7_1030009                        | Listeria_monocytogenes_1639_v18 | 0.9029 |
| Listeria_monocytogenes_LO28_393132                       | Listeria_monocytogenes_1639_v18 | 0.9187 |
| Listeria_monocytogenes_L99_563174                        | Listeria_monocytogenes_1639_v18 | 0.9035 |
| Listeria_monocytogenes_L312_882094                       | Listeria_monocytogenes_1639_v18 | 0.948  |
| Listeria_monocytogenes_J1816_930781                      | Listeria_monocytogenes_1639_v18 | 0.9652 |
| Listeria_monocytogenes_J1-220_930782                     | Listeria_monocytogenes_1639_v18 | 0.9402 |
| Listeria_monocytogenes_J0161_393130                      | Listeria_monocytogenes_1639_v18 | 0.9245 |
| Listeria_monocytogenes_HCC23_552536                      | Listeria_monocytogenes_1639_v18 | 0.9028 |
| Listeria_monocytogenes_FSL_R2-561_393126                 | Listeria_monocytogenes_1639_v18 | 0.9161 |
| Listeria_monocytogenes_FSL_J1-208_393119                 | Listeria_monocytogenes_1639_v18 | 0.8928 |
| Listeria_monocytogenes_FSL_J1-175_393118                 | Listeria_monocytogenes_1639_v18 | 0.931  |
| Listeria_monocytogenes_Finland_1998_393127               | Listeria_monocytogenes_1639_v18 | 0.9238 |
| Listeria_monocytogenes_EGD-e_169963_v1                   | Listeria_monocytogenes_1639_v18 | 0.9264 |
| Listeria_monocytogenes_EGD-e_169963                      | Listeria_monocytogenes_1639_v18 | 0.9268 |
| Listeria_monocytogenes_EGD_1334565                       | Listeria_monocytogenes_1639_v18 | 0.9176 |
| Listeria_monocytogenes_CFSAN002349_1299895               | Listeria_monocytogenes_1639_v18 | 0.953  |
| Listeria_monocytogenes_ATCC_19117_882095_v1              | Listeria_monocytogenes_1639_v18 | 0.9419 |
| Listeria_monocytogenes_ATCC_19117_882095                 | Listeria_monocytogenes_1639_v18 | 0.9419 |
| Listeria_monocytogenes_6179_1288295                      | Listeria_monocytogenes_1639_v18 | 0.9133 |
| Listeria_monocytogenes_1639_v9                           | Listeria_monocytogenes_1639_v18 | 0.9452 |
| Listeria_monocytogenes_1639_v99                          | Listeria_monocytogenes_1639_v18 | 0.9682 |
| Listeria_monocytogenes_1639_v98                          | Listeria_monocytogenes_1639_v18 | 0.9241 |
| Listeria_monocytogenes_1639_v97                          | Listeria_monocytogenes_1639_v18 | 0.9558 |
| Listeria_monocytogenes_1639_v96                          | Listeria_monocytogenes_1639_v18 | 0.9671 |
| Listeria_monocytogenes_1639_v95                          | Listeria_monocytogenes_1639_v18 | 0.9671 |
| Listeria_monocytogenes_1639_v94                          | Listeria_monocytogenes_1639_v18 | 0.9667 |
| Listeria_monocytogenes_1639_v93                          | Listeria_monocytogenes_1639_v18 | 0.9034 |
| Listeria_monocytogenes_1639_v92                          | Listeria_monocytogenes_1639_v18 | 0.9682 |
| Listeria_monocytogenes_1639_v91                          | Listeria_monocytogenes_1639_v18 | 0.945  |
| Listeria_monocytogenes_1639_v90                          | Listeria_monocytogenes_1639_v18 | 0.9241 |
| Listeria_monocytogenes_1639_v8                           | Listeria_monocytogenes_1639_v18 | 0.9021 |
| Listeria_monocytogenes_1639_v89                          | Listeria_monocytogenes_1639_v18 | 0.9534 |
| Listeria_monocytogenes_1639_v88                          | Listeria_monocytogenes_1639_v18 | 0.9206 |
| Listeria_monocytogenes_1639_v87                          | Listeria_monocytogenes_1639_v18 | 0.919  |
| Listeria_monocytogenes_1639_v86                          | Listeria_monocytogenes_1639_v18 | 0.9183 |
| Listeria_monocytogenes_1639_v85                          | Listeria_monocytogenes_1639_v18 | 0.9461 |
| Listeria_monocytogenes_1639_v84                          | Listeria_monocytogenes_1639_v18 | 0.9237 |
| Listeria_monocytogenes_1639_v83                          | Listeria_monocytogenes_1639_v18 | 0.9441 |
| Listeria_monocytogenes_1639_v82                          | Listeria_monocytogenes_1639_v18 | 0.9434 |
| Listeria_monocytogenes_1639_v81                          | Listeria_monocytogenes_1639_v18 | 0.9198 |
| Listeria_monocytogenes_1639_v80                          | Listeria_monocytogenes_1639_v18 | 0.9362 |
| Listeria_monocytogenes_1639_v7                           | Listeria_monocytogenes_1639_v18 | 0.9021 |
| Listeria_monocytogenes_1639_v79                          | Listeria_monocytogenes_1639_v18 | 0.9189 |
| Listeria_monocytogenes_1639_v78                          | Listeria_monocytogenes_1639_v18 | 0.9191 |
| Listeria_monocytogenes_1639_v77                          | Listeria_monocytogenes_1639_v18 | 0.9181 |
| Listeria_monocytogenes_1639_v76                          | Listeria_monocytogenes_1639_v18 | 0.9146 |
| Listeria_monocytogenes_1639_v75                          | Listeria_monocytogenes_1639_v18 | 0.9035 |
| Listeria_monocytogenes_1639_v74                          | Listeria_monocytogenes_1639_v18 | 0.9129 |
| Listeria_monocytogenes_1639_v73                          | Listeria_monocytogenes_1639_v18 | 0.9151 |
| Listeria_monocytogenes_1639_v72                          | Listeria_monocytogenes_1639_v18 | 0.9455 |
| Listeria_monocytogenes_1639_v71                          | Listeria_monocytogenes_1639_v18 | 0.9048 |
| Listeria_monocytogenes_1639_v70                          | Listeria_monocytogenes_1639_v18 | 0.9171 |
| Listeria_monocytogenes_1639_v6                           | Listeria_monocytogenes_1639_v18 | 0.9014 |
| Listeria_monocytogenes_1639_v69                          | Listeria_monocytogenes_1639_v18 | 0.946  |
| Listeria_monocytogenes_1639_v68                          | Listeria_monocytogenes_1639_v18 | 0.9202 |
| Listeria_monocytogenes_1639_v67                          | Listeria_monocytogenes_1639_v18 | 0.9334 |
| Listeria_monocytogenes_1639_v66                          | Listeria_monocytogenes_1639_v18 | 0.9127 |
| Listeria_monocytogenes_1639_v65                          | Listeria_monocytogenes_1639_v18 | 0.9203 |
| Listeria_monocytogenes_1639_v64                          | Listeria_monocytogenes_1639_v18 | 0.9049 |
| Listeria_monocytogenes_1639_v63                          | Listeria_monocytogenes_1639_v18 | 0.9313 |
| Listeria_monocytogenes_1639_v62                          | Listeria_monocytogenes_1639_v18 | 0.9187 |
| Listeria_monocytogenes_1639_v61                          | Listeria_monocytogenes_1639_v18 | 0.9174 |
| Listeria_monocytogenes_1639_v60                          | Listeria_monocytogenes_1639_v18 | 0.9198 |
| Listeria_monocytogenes_1639_v5                           | Listeria_monocytogenes_1639_v18 | 0.9219 |
| Listeria_monocytogenes_1639_v59                          | Listeria_monocytogenes_1639_v18 | 0.9356 |
| Listeria_monocytogenes_1639_v58                          | Listeria_monocytogenes_1639_v18 | 0.9481 |
| Listeria_monocytogenes_1639_v57                          | Listeria_monocytogenes_1639_v18 | 0.9916 |
| Listeria_monocytogenes_1639_v56                          | Listeria_monocytogenes_1639_v18 | 0.9459 |
| Listeria_monocytogenes_1639_v55                          | Listeria_monocytogenes_1639_v18 | 0.9688 |
| Listeria_monocytogenes_1639_v54                          | Listeria_monocytogenes_1639_v18 | 0.9118 |
| Listeria_monocytogenes_1639_v53                          | Listeria_monocytogenes_1639_v18 | 0.9065 |
| Listeria_monocytogenes_1639_v52                          | Listeria_monocytogenes_1639_v18 | 0.9446 |
| Listeria_monocytogenes_1639_v51                          | Listeria_monocytogenes_1639_v18 | 0.9418 |

|                                                          |                                  |        |
|----------------------------------------------------------|----------------------------------|--------|
| Listeria_monocytogenes_1639_v50                          | Listeria_monocytogenes_1639_v18  | 0.9125 |
| Listeria_monocytogenes_1639_v4                           | Listeria_monocytogenes_1639_v18  | 0.9347 |
| Listeria_monocytogenes_1639_v49                          | Listeria_monocytogenes_1639_v18  | 0.9328 |
| Listeria_monocytogenes_1639_v48                          | Listeria_monocytogenes_1639_v18  | 0.9158 |
| Listeria_monocytogenes_1639_v47                          | Listeria_monocytogenes_1639_v18  | 0.9133 |
| Listeria_monocytogenes_1639_v46                          | Listeria_monocytogenes_1639_v18  | 0.9169 |
| Listeria_monocytogenes_1639_v45                          | Listeria_monocytogenes_1639_v18  | 0.9041 |
| Listeria_monocytogenes_1639_v44                          | Listeria_monocytogenes_1639_v18  | 0.9133 |
| Listeria_monocytogenes_1639_v43                          | Listeria_monocytogenes_1639_v18  | 0.9133 |
| Listeria_monocytogenes_1639_v42                          | Listeria_monocytogenes_1639_v18  | 0.9036 |
| Listeria_monocytogenes_1639_v41                          | Listeria_monocytogenes_1639_v18  | 0.8936 |
| Listeria_monocytogenes_1639_v40                          | Listeria_monocytogenes_1639_v18  | 0.9081 |
| Listeria_monocytogenes_1639_v3                           | Listeria_monocytogenes_1639_v18  | 0.935  |
| Listeria_monocytogenes_1639_v39                          | Listeria_monocytogenes_1639_v18  | 0.9323 |
| Listeria_monocytogenes_1639_v38                          | Listeria_monocytogenes_1639_v18  | 0.9058 |
| Listeria_monocytogenes_1639_v37                          | Listeria_monocytogenes_1639_v18  | 0.9266 |
| Listeria_monocytogenes_1639_v36                          | Listeria_monocytogenes_1639_v18  | 0.9003 |
| Listeria_monocytogenes_1639_v35                          | Listeria_monocytogenes_1639_v18  | 0.9087 |
| Listeria_monocytogenes_1639_v34                          | Listeria_monocytogenes_1639_v18  | 0.9128 |
| Listeria_monocytogenes_1639_v33                          | Listeria_monocytogenes_1639_v18  | 0.9339 |
| Listeria_monocytogenes_1639_v32                          | Listeria_monocytogenes_1639_v18  | 0.9122 |
| Listeria_monocytogenes_1639_v31                          | Listeria_monocytogenes_1639_v18  | 0.9132 |
| Listeria_monocytogenes_1639_v30                          | Listeria_monocytogenes_1639_v18  | 0.9407 |
| Listeria_monocytogenes_1639_v2                           | Listeria_monocytogenes_1639_v18  | 0.924  |
| Listeria_monocytogenes_1639_v29                          | Listeria_monocytogenes_1639_v18  | 0.9057 |
| Listeria_monocytogenes_1639_v28                          | Listeria_monocytogenes_1639_v18  | 0.9111 |
| Listeria_monocytogenes_1639_v27                          | Listeria_monocytogenes_1639_v18  | 0.9015 |
| Listeria_monocytogenes_1639_v26                          | Listeria_monocytogenes_1639_v18  | 0.9027 |
| Listeria_monocytogenes_1639_v25                          | Listeria_monocytogenes_1639_v18  | 0.9031 |
| Listeria_monocytogenes_1639_v24                          | Listeria_monocytogenes_1639_v18  | 0.9431 |
| Listeria_monocytogenes_1639_v23                          | Listeria_monocytogenes_1639_v18  | 0.9428 |
| Listeria_monocytogenes_1639_v22                          | Listeria_monocytogenes_1639_v18  | 0.9411 |
| Listeria_monocytogenes_1639_v21                          | Listeria_monocytogenes_1639_v18  | 0.9388 |
| Listeria_monocytogenes_1639_v20                          | Listeria_monocytogenes_1639_v18  | 0.9245 |
| Listeria_monocytogenes_1639_v1                           | Listeria_monocytogenes_1639_v18  | 0.9083 |
| Listeria_monocytogenes_1639_v19                          | Listeria_monocytogenes_1639_v18  | 0.9241 |
| Listeria_monocytogenes_1639_v198                         | Listeria_monocytogenes_1639_v18  | 0.8783 |
| Listeria_monocytogenes_1639_v197                         | Listeria_monocytogenes_1639_v18  | 0.9152 |
| Listeria_monocytogenes_1639_v196                         | Listeria_monocytogenes_1639_v18  | 0.9005 |
| Listeria_monocytogenes_1639_v195                         | Listeria_monocytogenes_1639_v18  | 0.9195 |
| Listeria_monocytogenes_1639_v194                         | Listeria_monocytogenes_1639_v18  | 0.9192 |
| Listeria_monocytogenes_1639_v193                         | Listeria_monocytogenes_1639_v18  | 0.9192 |
| Listeria_monocytogenes_1639_v192                         | Listeria_monocytogenes_1639_v18  | 0.8884 |
| Listeria_monocytogenes_1639_v191                         | Listeria_monocytogenes_1639_v18  | 0.924  |
| Listeria_monocytogenes_1639_v190                         | Listeria_monocytogenes_1639_v18  | 0.9248 |
| Listeria_monocytogenes_1639_v18                          | Listeria_monocytogenes_1639_v18  | 0.0727 |
| Listeria_welshimeri_1643                                 | Listeria_monocytogenes_1639_v190 | 0.8834 |
| Listeria_welshimeri_serovar_6b_str_SLCC5334_386043       | Listeria_monocytogenes_1639_v190 | 0.8827 |
| Listeria_seeligeri_serovar_1_2b_str_SLCC3954_683837      | Listeria_monocytogenes_1639_v190 | 0.8954 |
| Listeria_seeligeri_FSL_S4-171_702452                     | Listeria_monocytogenes_1639_v190 | 0.8269 |
| Listeria_seeligeri_FSL_N1-067_702453                     | Listeria_monocytogenes_1639_v190 | 0.836  |
| Listeria_seeligeri_1640_v1                               | Listeria_monocytogenes_1639_v190 | 0.8937 |
| Listeria_seeligeri_1640                                  | Listeria_monocytogenes_1639_v190 | 0.884  |
| Listeria_monocytogenes_WSLC1042_1457188                  | Listeria_monocytogenes_1639_v190 | 0.9411 |
| Listeria_monocytogenes_WSLC1001_1457187                  | Listeria_monocytogenes_1639_v190 | 0.9804 |
| Listeria_monocytogenes_SLCC7179_879090                   | Listeria_monocytogenes_1639_v190 | 0.9702 |
| Listeria_monocytogenes_SLCC5850_882096                   | Listeria_monocytogenes_1639_v190 | 0.9854 |
| Listeria_monocytogenes_SLCC2755_932919                   | Listeria_monocytogenes_1639_v190 | 0.9457 |
| Listeria_monocytogenes_SLCC2540_879089                   | Listeria_monocytogenes_1639_v190 | 0.9451 |
| Listeria_monocytogenes_SLCC2479_882020                   | Listeria_monocytogenes_1639_v190 | 0.9547 |
| Listeria_monocytogenes_SLCC2378_879088                   | Listeria_monocytogenes_1639_v190 | 0.9425 |
| Listeria_monocytogenes_SLCC2376_882097                   | Listeria_monocytogenes_1639_v190 | 0.9556 |
| Listeria_monocytogenes_SLCC2372_932920                   | Listeria_monocytogenes_1639_v190 | 0.9471 |
| Listeria_monocytogenes_serotype_4b_str_LL195_1230340     | Listeria_monocytogenes_1639_v190 | 0.9487 |
| Listeria_monocytogenes_serotype_4b_str_LIS0087_1134669   | Listeria_monocytogenes_1639_v190 | 0.9615 |
| Listeria_monocytogenes_serotype_4b_str_F2365_265669      | Listeria_monocytogenes_1639_v190 | 0.9487 |
| Listeria_monocytogenes_serotype_4b_str_CLIP_80459_568819 | Listeria_monocytogenes_1639_v190 | 0.9553 |
| Listeria_monocytogenes_serotype_4b_str_81-0861_1196161   | Listeria_monocytogenes_1639_v190 | 0.931  |
| Listeria_monocytogenes_serotype_4b_str_81-0592_1196160   | Listeria_monocytogenes_1639_v190 | 0.9321 |
| Listeria_monocytogenes_serotype_4b_str_81-0558_1196159   | Listeria_monocytogenes_1639_v190 | 0.9332 |
| Listeria_monocytogenes_serotype_4b_str_10-0809_1196162   | Listeria_monocytogenes_1639_v190 | 0.9324 |
| Listeria_monocytogenes_serotype_4b_str_02-6680_1196175   | Listeria_monocytogenes_1639_v190 | 0.9538 |
| Listeria_monocytogenes_serotype_4b_str_02-6679_1196174   | Listeria_monocytogenes_1639_v190 | 0.9538 |
| Listeria_monocytogenes_serotype_4b_str_02-1792_1196173   | Listeria_monocytogenes_1639_v190 | 0.9328 |
| Listeria_monocytogenes_serotype_4b_str_02-1289_1196172   | Listeria_monocytogenes_1639_v190 | 0.9328 |
| Listeria_monocytogenes_serotype_4b_str_02-1103_1196171   | Listeria_monocytogenes_1639_v190 | 0.9328 |
| Listeria_monocytogenes_serotype_3c_str_10-5027_1196195   | Listeria_monocytogenes_1639_v190 | 0.9539 |
| Listeria_monocytogenes_serotype_1_2c_str_10-5026_1196194 | Listeria_monocytogenes_1639_v190 | 0.955  |
| Listeria_monocytogenes_serotype_1_2c_str_10-5025_1196193 | Listeria_monocytogenes_1639_v190 | 0.955  |
| Listeria_monocytogenes_serotype_1_2b_str_10-0811_1196164 | Listeria_monocytogenes_1639_v190 | 0.9359 |
| Listeria_monocytogenes_serotype_1_2b_str_10-0810_1196163 | Listeria_monocytogenes_1639_v190 | 0.9359 |
| Listeria_monocytogenes_serotype_1_2a_str_99-6370_1196179 | Listeria_monocytogenes_1639_v190 | 0.9436 |
| Listeria_monocytogenes_serotype_1_2a_str_98-2035_1196178 | Listeria_monocytogenes_1639_v190 | 0.9436 |
| Listeria_monocytogenes_serotype_1_2a_str_95-0093_1196177 | Listeria_monocytogenes_1639_v190 | 0.9497 |
| Listeria_monocytogenes_serotype_1_2a_str_88-0478_1196176 | Listeria_monocytogenes_1639_v190 | 0.9489 |
| Listeria_monocytogenes_serotype_1_2a_str_10-5024_1196192 | Listeria_monocytogenes_1639_v190 | 0.95   |
| Listeria_monocytogenes_serotype_1_2a_str_10-4758_1196168 | Listeria_monocytogenes_1639_v190 | 0.9642 |
| Listeria_monocytogenes_serotype_1_2a_str_10-4754_1196167 | Listeria_monocytogenes_1639_v190 | 0.9642 |
| Listeria_monocytogenes_serotype_1_2a_str_10-1321_1196191 | Listeria_monocytogenes_1639_v190 | 0.95   |
| Listeria_monocytogenes_serotype_1_2a_str_10-1047_1196190 | Listeria_monocytogenes_1639_v190 | 0.9504 |
| Listeria_monocytogenes_serotype_1_2a_str_10-1046_1196189 | Listeria_monocytogenes_1639_v190 | 0.9504 |

|                                                          |                                  |        |
|----------------------------------------------------------|----------------------------------|--------|
| Listeria_monocytogenes_serotype_1_2a_str_10-0934_1196170 | Listeria_monocytogenes_1639_v190 | 0.986  |
| Listeria_monocytogenes_serotype_1_2a_str_10-0933_1196169 | Listeria_monocytogenes_1639_v190 | 0.986  |
| Listeria_monocytogenes_serotype_1_2a_str_10-0815_1196188 | Listeria_monocytogenes_1639_v190 | 0.945  |
| Listeria_monocytogenes_serotype_1_2a_str_10-0814_1196187 | Listeria_monocytogenes_1639_v190 | 0.9497 |
| Listeria_monocytogenes_serotype_1_2a_str_10-0813_1196166 | Listeria_monocytogenes_1639_v190 | 0.9774 |
| Listeria_monocytogenes_serotype_1_2a_str_10-0812_1196165 | Listeria_monocytogenes_1639_v190 | 0.9774 |
| Listeria_monocytogenes_serotype_1_2a_str_08-7669_1196186 | Listeria_monocytogenes_1639_v190 | 0.9598 |
| Listeria_monocytogenes_serotype_1_2a_str_08-7374_1196185 | Listeria_monocytogenes_1639_v190 | 0.95   |
| Listeria_monocytogenes_serotype_1_2a_str_08-6997_1196184 | Listeria_monocytogenes_1639_v190 | 0.945  |
| Listeria_monocytogenes_serotype_1_2a_str_08-6569_1196183 | Listeria_monocytogenes_1639_v190 | 0.945  |
| Listeria_monocytogenes_serotype_1_2a_str_08-6056_1196182 | Listeria_monocytogenes_1639_v190 | 0.945  |
| Listeria_monocytogenes_serotype_1_2a_str_04-5457_1196181 | Listeria_monocytogenes_1639_v190 | 0.95   |
| Listeria_monocytogenes_serotype_1_2a_str_02-5993_1196180 | Listeria_monocytogenes_1639_v190 | 0.9497 |
| Listeria_monocytogenes_R479a_1437838                     | Listeria_monocytogenes_1639_v190 | 0.9486 |
| Listeria_monocytogenes_N53-1_1234142                     | Listeria_monocytogenes_1639_v190 | 0.9183 |
| Listeria_monocytogenes_M7_1030009                        | Listeria_monocytogenes_1639_v190 | 0.9086 |
| Listeria_monocytogenes_LO28_393132                       | Listeria_monocytogenes_1639_v190 | 0.9532 |
| Listeria_monocytogenes_L99_563174                        | Listeria_monocytogenes_1639_v190 | 0.9093 |
| Listeria_monocytogenes_L312_882094                       | Listeria_monocytogenes_1639_v190 | 0.9553 |
| Listeria_monocytogenes_J1816_930781                      | Listeria_monocytogenes_1639_v190 | 0.9346 |
| Listeria_monocytogenes_J1-220_930782                     | Listeria_monocytogenes_1639_v190 | 0.9288 |
| Listeria_monocytogenes_J0161_393130                      | Listeria_monocytogenes_1639_v190 | 0.954  |
| Listeria_monocytogenes_HCC23_552536                      | Listeria_monocytogenes_1639_v190 | 0.9089 |
| Listeria_monocytogenes_FSL_R2-561_393126                 | Listeria_monocytogenes_1639_v190 | 0.9532 |
| Listeria_monocytogenes_FSL_J1-208_393119                 | Listeria_monocytogenes_1639_v190 | 0.919  |
| Listeria_monocytogenes_FSL_J1-175_393118                 | Listeria_monocytogenes_1639_v190 | 0.9499 |
| Listeria_monocytogenes_Finland_1998_393127               | Listeria_monocytogenes_1639_v190 | 0.9739 |
| Listeria_monocytogenes_EGD-e_169963_v1                   | Listeria_monocytogenes_1639_v190 | 0.9631 |
| Listeria_monocytogenes_EGD-e_169963                      | Listeria_monocytogenes_1639_v190 | 0.9631 |
| Listeria_monocytogenes_EGD_1334565                       | Listeria_monocytogenes_1639_v190 | 0.9861 |
| Listeria_monocytogenes_CFSAN002349_1299895               | Listeria_monocytogenes_1639_v190 | 0.9535 |
| Listeria_monocytogenes_ATCC_19117_882095_v1              | Listeria_monocytogenes_1639_v190 | 0.9489 |
| Listeria_monocytogenes_ATCC_19117_882095                 | Listeria_monocytogenes_1639_v190 | 0.9489 |
| Listeria_monocytogenes_6179_1288295                      | Listeria_monocytogenes_1639_v190 | 0.9396 |
| Listeria_monocytogenes_1639_v9                           | Listeria_monocytogenes_1639_v190 | 0.9207 |
| Listeria_monocytogenes_1639_v99                          | Listeria_monocytogenes_1639_v190 | 0.9354 |
| Listeria_monocytogenes_1639_v98                          | Listeria_monocytogenes_1639_v190 | 0.9512 |
| Listeria_monocytogenes_1639_v97                          | Listeria_monocytogenes_1639_v190 | 0.9421 |
| Listeria_monocytogenes_1639_v96                          | Listeria_monocytogenes_1639_v190 | 0.9343 |
| Listeria_monocytogenes_1639_v95                          | Listeria_monocytogenes_1639_v190 | 0.9343 |
| Listeria_monocytogenes_1639_v94                          | Listeria_monocytogenes_1639_v190 | 0.9347 |
| Listeria_monocytogenes_1639_v93                          | Listeria_monocytogenes_1639_v190 | 0.9496 |
| Listeria_monocytogenes_1639_v92                          | Listeria_monocytogenes_1639_v190 | 0.935  |
| Listeria_monocytogenes_1639_v91                          | Listeria_monocytogenes_1639_v190 | 0.93   |
| Listeria_monocytogenes_1639_v90                          | Listeria_monocytogenes_1639_v190 | 0.9512 |
| Listeria_monocytogenes_1639_v8                           | Listeria_monocytogenes_1639_v190 | 0.9383 |
| Listeria_monocytogenes_1639_v89                          | Listeria_monocytogenes_1639_v190 | 0.9454 |
| Listeria_monocytogenes_1639_v88                          | Listeria_monocytogenes_1639_v190 | 0.9656 |
| Listeria_monocytogenes_1639_v87                          | Listeria_monocytogenes_1639_v190 | 0.9726 |
| Listeria_monocytogenes_1639_v86                          | Listeria_monocytogenes_1639_v190 | 0.9722 |
| Listeria_monocytogenes_1639_v85                          | Listeria_monocytogenes_1639_v190 | 0.9303 |
| Listeria_monocytogenes_1639_v84                          | Listeria_monocytogenes_1639_v190 | 0.9579 |
| Listeria_monocytogenes_1639_v83                          | Listeria_monocytogenes_1639_v190 | 0.9377 |
| Listeria_monocytogenes_1639_v82                          | Listeria_monocytogenes_1639_v190 | 0.9374 |
| Listeria_monocytogenes_1639_v81                          | Listeria_monocytogenes_1639_v190 | 0.9534 |
| Listeria_monocytogenes_1639_v80                          | Listeria_monocytogenes_1639_v190 | 0.9406 |
| Listeria_monocytogenes_1639_v7                           | Listeria_monocytogenes_1639_v190 | 0.9383 |
| Listeria_monocytogenes_1639_v79                          | Listeria_monocytogenes_1639_v190 | 0.9512 |
| Listeria_monocytogenes_1639_v78                          | Listeria_monocytogenes_1639_v190 | 0.9527 |
| Listeria_monocytogenes_1639_v77                          | Listeria_monocytogenes_1639_v190 | 0.9578 |
| Listeria_monocytogenes_1639_v76                          | Listeria_monocytogenes_1639_v190 | 0.9473 |
| Listeria_monocytogenes_1639_v75                          | Listeria_monocytogenes_1639_v190 | 0.9093 |
| Listeria_monocytogenes_1639_v74                          | Listeria_monocytogenes_1639_v190 | 0.9715 |
| Listeria_monocytogenes_1639_v73                          | Listeria_monocytogenes_1639_v190 | 0.9482 |
| Listeria_monocytogenes_1639_v72                          | Listeria_monocytogenes_1639_v190 | 0.9365 |
| Listeria_monocytogenes_1639_v71                          | Listeria_monocytogenes_1639_v190 | 0.9392 |
| Listeria_monocytogenes_1639_v70                          | Listeria_monocytogenes_1639_v190 | 0.951  |
| Listeria_monocytogenes_1639_v6                           | Listeria_monocytogenes_1639_v190 | 0.9376 |
| Listeria_monocytogenes_1639_v69                          | Listeria_monocytogenes_1639_v190 | 0.9324 |
| Listeria_monocytogenes_1639_v68                          | Listeria_monocytogenes_1639_v190 | 0.9572 |
| Listeria_monocytogenes_1639_v67                          | Listeria_monocytogenes_1639_v190 | 0.9415 |
| Listeria_monocytogenes_1639_v66                          | Listeria_monocytogenes_1639_v190 | 0.9623 |
| Listeria_monocytogenes_1639_v65                          | Listeria_monocytogenes_1639_v190 | 0.9525 |
| Listeria_monocytogenes_1639_v64                          | Listeria_monocytogenes_1639_v190 | 0.9546 |
| Listeria_monocytogenes_1639_v63                          | Listeria_monocytogenes_1639_v190 | 0.937  |
| Listeria_monocytogenes_1639_v62                          | Listeria_monocytogenes_1639_v190 | 0.949  |
| Listeria_monocytogenes_1639_v61                          | Listeria_monocytogenes_1639_v190 | 0.9525 |
| Listeria_monocytogenes_1639_v60                          | Listeria_monocytogenes_1639_v190 | 0.9564 |
| Listeria_monocytogenes_1639_v5                           | Listeria_monocytogenes_1639_v190 | 0.9014 |
| Listeria_monocytogenes_1639_v59                          | Listeria_monocytogenes_1639_v190 | 0.9384 |
| Listeria_monocytogenes_1639_v58                          | Listeria_monocytogenes_1639_v190 | 0.9377 |
| Listeria_monocytogenes_1639_v57                          | Listeria_monocytogenes_1639_v190 | 0.9308 |
| Listeria_monocytogenes_1639_v56                          | Listeria_monocytogenes_1639_v190 | 0.9384 |
| Listeria_monocytogenes_1639_v55                          | Listeria_monocytogenes_1639_v190 | 0.9273 |
| Listeria_monocytogenes_1639_v54                          | Listeria_monocytogenes_1639_v190 | 0.9334 |
| Listeria_monocytogenes_1639_v53                          | Listeria_monocytogenes_1639_v190 | 0.9553 |
| Listeria_monocytogenes_1639_v52                          | Listeria_monocytogenes_1639_v190 | 0.9352 |
| Listeria_monocytogenes_1639_v51                          | Listeria_monocytogenes_1639_v190 | 0.9331 |
| Listeria_monocytogenes_1639_v50                          | Listeria_monocytogenes_1639_v190 | 0.9485 |
| Listeria_monocytogenes_1639_v4                           | Listeria_monocytogenes_1639_v190 | 0.9144 |
| Listeria_monocytogenes_1639_v49                          | Listeria_monocytogenes_1639_v190 | 0.9321 |

|                                                          |                                  |        |
|----------------------------------------------------------|----------------------------------|--------|
| Listeria_monocytogenes_1639_v48                          | Listeria_monocytogenes_1639_v190 | 0.9489 |
| Listeria_monocytogenes_1639_v47                          | Listeria_monocytogenes_1639_v190 | 0.9497 |
| Listeria_monocytogenes_1639_v46                          | Listeria_monocytogenes_1639_v190 | 0.9565 |
| Listeria_monocytogenes_1639_v45                          | Listeria_monocytogenes_1639_v190 | 0.9397 |
| Listeria_monocytogenes_1639_v44                          | Listeria_monocytogenes_1639_v190 | 0.95   |
| Listeria_monocytogenes_1639_v43                          | Listeria_monocytogenes_1639_v190 | 0.95   |
| Listeria_monocytogenes_1639_v42                          | Listeria_monocytogenes_1639_v190 | 0.9413 |
| Listeria_monocytogenes_1639_v41                          | Listeria_monocytogenes_1639_v190 | 0.9319 |
| Listeria_monocytogenes_1639_v40                          | Listeria_monocytogenes_1639_v190 | 0.9536 |
| Listeria_monocytogenes_1639_v3                           | Listeria_monocytogenes_1639_v190 | 0.9148 |
| Listeria_monocytogenes_1639_v39                          | Listeria_monocytogenes_1639_v190 | 0.9369 |
| Listeria_monocytogenes_1639_v38                          | Listeria_monocytogenes_1639_v190 | 0.9507 |
| Listeria_monocytogenes_1639_v37                          | Listeria_monocytogenes_1639_v190 | 0.9472 |
| Listeria_monocytogenes_1639_v36                          | Listeria_monocytogenes_1639_v190 | 0.9492 |
| Listeria_monocytogenes_1639_v35                          | Listeria_monocytogenes_1639_v190 | 0.9543 |
| Listeria_monocytogenes_1639_v34                          | Listeria_monocytogenes_1639_v190 | 0.9485 |
| Listeria_monocytogenes_1639_v33                          | Listeria_monocytogenes_1639_v190 | 0.9359 |
| Listeria_monocytogenes_1639_v32                          | Listeria_monocytogenes_1639_v190 | 0.9457 |
| Listeria_monocytogenes_1639_v31                          | Listeria_monocytogenes_1639_v190 | 0.9488 |
| Listeria_monocytogenes_1639_v30                          | Listeria_monocytogenes_1639_v190 | 0.9377 |
| Listeria_monocytogenes_1639_v2                           | Listeria_monocytogenes_1639_v190 | 0.9036 |
| Listeria_monocytogenes_1639_v29                          | Listeria_monocytogenes_1639_v190 | 0.94   |
| Listeria_monocytogenes_1639_v28                          | Listeria_monocytogenes_1639_v190 | 0.9446 |
| Listeria_monocytogenes_1639_v27                          | Listeria_monocytogenes_1639_v190 | 0.9351 |
| Listeria_monocytogenes_1639_v26                          | Listeria_monocytogenes_1639_v190 | 0.9348 |
| Listeria_monocytogenes_1639_v25                          | Listeria_monocytogenes_1639_v190 | 0.9344 |
| Listeria_monocytogenes_1639_v24                          | Listeria_monocytogenes_1639_v190 | 0.9288 |
| Listeria_monocytogenes_1639_v23                          | Listeria_monocytogenes_1639_v190 | 0.9288 |
| Listeria_monocytogenes_1639_v22                          | Listeria_monocytogenes_1639_v190 | 0.9373 |
| Listeria_monocytogenes_1639_v21                          | Listeria_monocytogenes_1639_v190 | 0.9288 |
| Listeria_monocytogenes_1639_v20                          | Listeria_monocytogenes_1639_v190 | 0.9329 |
| Listeria_monocytogenes_1639_v1                           | Listeria_monocytogenes_1639_v190 | 0.9327 |
| Listeria_monocytogenes_1639_v19                          | Listeria_monocytogenes_1639_v190 | 0.9325 |
| Listeria_monocytogenes_1639_v198                         | Listeria_monocytogenes_1639_v190 | 0.9204 |
| Listeria_monocytogenes_1639_v197                         | Listeria_monocytogenes_1639_v190 | 0.9495 |
| Listeria_monocytogenes_1639_v196                         | Listeria_monocytogenes_1639_v190 | 0.9694 |
| Listeria_monocytogenes_1639_v195                         | Listeria_monocytogenes_1639_v190 | 0.9579 |
| Listeria_monocytogenes_1639_v194                         | Listeria_monocytogenes_1639_v190 | 0.956  |
| Listeria_monocytogenes_1639_v193                         | Listeria_monocytogenes_1639_v190 | 0.9564 |
| Listeria_monocytogenes_1639_v192                         | Listeria_monocytogenes_1639_v190 | 0.9119 |
| Listeria_monocytogenes_1639_v191                         | Listeria_monocytogenes_1639_v190 | 0.9824 |
| Listeria_monocytogenes_1639_v190                         | Listeria_monocytogenes_1639_v190 | 0.066  |
| Listeria_welshimeri_1643                                 | Listeria_monocytogenes_1639_v191 | 0.8828 |
| Listeria_welshimeri_serovar_6b_str_SLCC5334_386043       | Listeria_monocytogenes_1639_v191 | 0.8821 |
| Listeria_seeligeri_serovar_1_2b_str_SLCC3954_683837      | Listeria_monocytogenes_1639_v191 | 0.8969 |
| Listeria_seeligeri_FSL_S4-171_702452                     | Listeria_monocytogenes_1639_v191 | 0.8263 |
| Listeria_seeligeri_FSL_N1-067_702453                     | Listeria_monocytogenes_1639_v191 | 0.8385 |
| Listeria_seeligeri_1640_v1                               | Listeria_monocytogenes_1639_v191 | 0.892  |
| Listeria_seeligeri_1640                                  | Listeria_monocytogenes_1639_v191 | 0.8881 |
| Listeria_monocytogenes_WSLC1042_1457188                  | Listeria_monocytogenes_1639_v191 | 0.9449 |
| Listeria_monocytogenes_WSLC1001_1457187                  | Listeria_monocytogenes_1639_v191 | 0.9639 |
| Listeria_monocytogenes_SLCC7179_879090                   | Listeria_monocytogenes_1639_v191 | 0.9694 |
| Listeria_monocytogenes_SLCC5850_882096                   | Listeria_monocytogenes_1639_v191 | 0.9687 |
| Listeria_monocytogenes_SLCC2755_932919                   | Listeria_monocytogenes_1639_v191 | 0.946  |
| Listeria_monocytogenes_SLCC2540_879089                   | Listeria_monocytogenes_1639_v191 | 0.9443 |
| Listeria_monocytogenes_SLCC2479_882020                   | Listeria_monocytogenes_1639_v191 | 0.9535 |
| Listeria_monocytogenes_SLCC2378_879088                   | Listeria_monocytogenes_1639_v191 | 0.9463 |
| Listeria_monocytogenes_SLCC2376_882097                   | Listeria_monocytogenes_1639_v191 | 0.9532 |
| Listeria_monocytogenes_SLCC2372_932920                   | Listeria_monocytogenes_1639_v191 | 0.9463 |
| Listeria_monocytogenes_serotype_4b_str_LL195_1230340     | Listeria_monocytogenes_1639_v191 | 0.9522 |
| Listeria_monocytogenes_serotype_4b_str_LIS0087_1134669   | Listeria_monocytogenes_1639_v191 | 0.9447 |
| Listeria_monocytogenes_serotype_4b_str_F2365_265669      | Listeria_monocytogenes_1639_v191 | 0.9522 |
| Listeria_monocytogenes_serotype_4b_str_CLIP_80459_568819 | Listeria_monocytogenes_1639_v191 | 0.9568 |
| Listeria_monocytogenes_serotype_4b_str_81-0861_1196161   | Listeria_monocytogenes_1639_v191 | 0.9347 |
| Listeria_monocytogenes_serotype_4b_str_81-0592_1196160   | Listeria_monocytogenes_1639_v191 | 0.9358 |
| Listeria_monocytogenes_serotype_4b_str_81-0558_1196159   | Listeria_monocytogenes_1639_v191 | 0.9369 |
| Listeria_monocytogenes_serotype_4b_str_10-0809_1196162   | Listeria_monocytogenes_1639_v191 | 0.9362 |
| Listeria_monocytogenes_serotype_4b_str_02-6680_1196175   | Listeria_monocytogenes_1639_v191 | 0.9542 |
| Listeria_monocytogenes_serotype_4b_str_02-6679_1196174   | Listeria_monocytogenes_1639_v191 | 0.9542 |
| Listeria_monocytogenes_serotype_4b_str_02-1792_1196173   | Listeria_monocytogenes_1639_v191 | 0.9362 |
| Listeria_monocytogenes_serotype_4b_str_02-1289_1196172   | Listeria_monocytogenes_1639_v191 | 0.9362 |
| Listeria_monocytogenes_serotype_4b_str_02-1103_1196171   | Listeria_monocytogenes_1639_v191 | 0.9362 |
| Listeria_monocytogenes_serotype_3c_str_10-5027_1196195   | Listeria_monocytogenes_1639_v191 | 0.9527 |
| Listeria_monocytogenes_serotype_1_2c_str_10-5026_1196194 | Listeria_monocytogenes_1639_v191 | 0.9538 |
| Listeria_monocytogenes_serotype_1_2c_str_10-5025_1196193 | Listeria_monocytogenes_1639_v191 | 0.9538 |
| Listeria_monocytogenes_serotype_1_2b_str_10-0811_1196164 | Listeria_monocytogenes_1639_v191 | 0.9343 |
| Listeria_monocytogenes_serotype_1_2b_str_10-0810_1196163 | Listeria_monocytogenes_1639_v191 | 0.9343 |
| Listeria_monocytogenes_serotype_1_2a_str_99-6370_1196179 | Listeria_monocytogenes_1639_v191 | 0.9405 |
| Listeria_monocytogenes_serotype_1_2a_str_98-2035_1196178 | Listeria_monocytogenes_1639_v191 | 0.9405 |
| Listeria_monocytogenes_serotype_1_2a_str_95-0093_1196177 | Listeria_monocytogenes_1639_v191 | 0.9466 |
| Listeria_monocytogenes_serotype_1_2a_str_88-0478_1196176 | Listeria_monocytogenes_1639_v191 | 0.9458 |
| Listeria_monocytogenes_serotype_1_2a_str_10-5024_1196192 | Listeria_monocytogenes_1639_v191 | 0.9469 |
| Listeria_monocytogenes_serotype_1_2a_str_10-4758_1196168 | Listeria_monocytogenes_1639_v191 | 0.9692 |
| Listeria_monocytogenes_serotype_1_2a_str_10-4754_1196167 | Listeria_monocytogenes_1639_v191 | 0.9692 |
| Listeria_monocytogenes_serotype_1_2a_str_10-1321_1196191 | Listeria_monocytogenes_1639_v191 | 0.9469 |
| Listeria_monocytogenes_serotype_1_2a_str_10-1047_1196190 | Listeria_monocytogenes_1639_v191 | 0.9473 |
| Listeria_monocytogenes_serotype_1_2a_str_10-1046_1196189 | Listeria_monocytogenes_1639_v191 | 0.9473 |
| Listeria_monocytogenes_serotype_1_2a_str_10-0934_1196170 | Listeria_monocytogenes_1639_v191 | 0.9805 |
| Listeria_monocytogenes_serotype_1_2a_str_10-0933_1196169 | Listeria_monocytogenes_1639_v191 | 0.9805 |
| Listeria_monocytogenes_serotype_1_2a_str_10-0815_1196188 | Listeria_monocytogenes_1639_v191 | 0.942  |
| Listeria_monocytogenes_serotype_1_2a_str_10-0814_1196187 | Listeria_monocytogenes_1639_v191 | 0.9466 |

|                                                          |                                  |        |
|----------------------------------------------------------|----------------------------------|--------|
| Listeria_monocytogenes_serotype_1_2a_str_10-0813_1196166 | Listeria_monocytogenes_1639_v191 | 0.9609 |
| Listeria_monocytogenes_serotype_1_2a_str_10-0812_1196165 | Listeria_monocytogenes_1639_v191 | 0.9609 |
| Listeria_monocytogenes_serotype_1_2a_str_08-7669_1196186 | Listeria_monocytogenes_1639_v191 | 0.9567 |
| Listeria_monocytogenes_serotype_1_2a_str_08-7374_1196185 | Listeria_monocytogenes_1639_v191 | 0.9469 |
| Listeria_monocytogenes_serotype_1_2a_str_08-6997_1196184 | Listeria_monocytogenes_1639_v191 | 0.942  |
| Listeria_monocytogenes_serotype_1_2a_str_08-6569_1196183 | Listeria_monocytogenes_1639_v191 | 0.942  |
| Listeria_monocytogenes_serotype_1_2a_str_08-6056_1196182 | Listeria_monocytogenes_1639_v191 | 0.942  |
| Listeria_monocytogenes_serotype_1_2a_str_04-5457_1196181 | Listeria_monocytogenes_1639_v191 | 0.9469 |
| Listeria_monocytogenes_serotype_1_2a_str_02-5993_1196180 | Listeria_monocytogenes_1639_v191 | 0.9466 |
| Listeria_monocytogenes_R479a_1437838                     | Listeria_monocytogenes_1639_v191 | 0.9459 |
| Listeria_monocytogenes_N53-1_1234142                     | Listeria_monocytogenes_1639_v191 | 0.9197 |
| Listeria_monocytogenes_M7_1030009                        | Listeria_monocytogenes_1639_v191 | 0.9138 |
| Listeria_monocytogenes_LO28_393132                       | Listeria_monocytogenes_1639_v191 | 0.952  |
| Listeria_monocytogenes_L99_563174                        | Listeria_monocytogenes_1639_v191 | 0.9145 |
| Listeria_monocytogenes_L312_882094                       | Listeria_monocytogenes_1639_v191 | 0.9568 |
| Listeria_monocytogenes_J1816_930781                      | Listeria_monocytogenes_1639_v191 | 0.9341 |
| Listeria_monocytogenes_J1-220_930782                     | Listeria_monocytogenes_1639_v191 | 0.9291 |
| Listeria_monocytogenes_J0161_393130                      | Listeria_monocytogenes_1639_v191 | 0.9585 |
| Listeria_monocytogenes_HCC23_552536                      | Listeria_monocytogenes_1639_v191 | 0.9141 |
| Listeria_monocytogenes_FSL_R2-561_393126                 | Listeria_monocytogenes_1639_v191 | 0.952  |
| Listeria_monocytogenes_FSL_J1-208_393119                 | Listeria_monocytogenes_1639_v191 | 0.9185 |
| Listeria_monocytogenes_FSL_J1-175_393118                 | Listeria_monocytogenes_1639_v191 | 0.9475 |
| Listeria_monocytogenes_Finland_1998_393127               | Listeria_monocytogenes_1639_v191 | 0.9785 |
| Listeria_monocytogenes_EGD-e_169963_v1                   | Listeria_monocytogenes_1639_v191 | 0.9619 |
| Listeria_monocytogenes_EGD-e_169963                      | Listeria_monocytogenes_1639_v191 | 0.9619 |
| Listeria_monocytogenes_EGD_1334565                       | Listeria_monocytogenes_1639_v191 | 0.9695 |
| Listeria_monocytogenes_CFSAN002349_1299895               | Listeria_monocytogenes_1639_v191 | 0.9535 |
| Listeria_monocytogenes_ATCC_19117_882095_v1              | Listeria_monocytogenes_1639_v191 | 0.9493 |
| Listeria_monocytogenes_ATCC_19117_882095                 | Listeria_monocytogenes_1639_v191 | 0.9492 |
| Listeria_monocytogenes_6179_1288295                      | Listeria_monocytogenes_1639_v191 | 0.944  |
| Listeria_monocytogenes_1639_v9                           | Listeria_monocytogenes_1639_v191 | 0.918  |
| Listeria_monocytogenes_1639_v99                          | Listeria_monocytogenes_1639_v191 | 0.9342 |
| Listeria_monocytogenes_1639_v98                          | Listeria_monocytogenes_1639_v191 | 0.9516 |
| Listeria_monocytogenes_1639_v97                          | Listeria_monocytogenes_1639_v191 | 0.9432 |
| Listeria_monocytogenes_1639_v96                          | Listeria_monocytogenes_1639_v191 | 0.9331 |
| Listeria_monocytogenes_1639_v95                          | Listeria_monocytogenes_1639_v191 | 0.9331 |
| Listeria_monocytogenes_1639_v94                          | Listeria_monocytogenes_1639_v191 | 0.9335 |
| Listeria_monocytogenes_1639_v93                          | Listeria_monocytogenes_1639_v191 | 0.9507 |
| Listeria_monocytogenes_1639_v92                          | Listeria_monocytogenes_1639_v191 | 0.9338 |
| Listeria_monocytogenes_1639_v91                          | Listeria_monocytogenes_1639_v191 | 0.9333 |
| Listeria_monocytogenes_1639_v90                          | Listeria_monocytogenes_1639_v191 | 0.9516 |
| Listeria_monocytogenes_1639_v8                           | Listeria_monocytogenes_1639_v191 | 0.9356 |
| Listeria_monocytogenes_1639_v89                          | Listeria_monocytogenes_1639_v191 | 0.9445 |
| Listeria_monocytogenes_1639_v88                          | Listeria_monocytogenes_1639_v191 | 0.9602 |
| Listeria_monocytogenes_1639_v87                          | Listeria_monocytogenes_1639_v191 | 0.9558 |
| Listeria_monocytogenes_1639_v86                          | Listeria_monocytogenes_1639_v191 | 0.9558 |
| Listeria_monocytogenes_1639_v85                          | Listeria_monocytogenes_1639_v191 | 0.9344 |
| Listeria_monocytogenes_1639_v84                          | Listeria_monocytogenes_1639_v191 | 0.964  |
| Listeria_monocytogenes_1639_v83                          | Listeria_monocytogenes_1639_v191 | 0.938  |
| Listeria_monocytogenes_1639_v82                          | Listeria_monocytogenes_1639_v191 | 0.9377 |
| Listeria_monocytogenes_1639_v81                          | Listeria_monocytogenes_1639_v191 | 0.9579 |
| Listeria_monocytogenes_1639_v80                          | Listeria_monocytogenes_1639_v191 | 0.939  |
| Listeria_monocytogenes_1639_v7                           | Listeria_monocytogenes_1639_v191 | 0.9356 |
| Listeria_monocytogenes_1639_v79                          | Listeria_monocytogenes_1639_v191 | 0.9557 |
| Listeria_monocytogenes_1639_v78                          | Listeria_monocytogenes_1639_v191 | 0.9572 |
| Listeria_monocytogenes_1639_v77                          | Listeria_monocytogenes_1639_v191 | 0.9566 |
| Listeria_monocytogenes_1639_v76                          | Listeria_monocytogenes_1639_v191 | 0.9518 |
| Listeria_monocytogenes_1639_v75                          | Listeria_monocytogenes_1639_v191 | 0.9145 |
| Listeria_monocytogenes_1639_v74                          | Listeria_monocytogenes_1639_v191 | 0.9558 |
| Listeria_monocytogenes_1639_v73                          | Listeria_monocytogenes_1639_v191 | 0.947  |
| Listeria_monocytogenes_1639_v72                          | Listeria_monocytogenes_1639_v191 | 0.9368 |
| Listeria_monocytogenes_1639_v71                          | Listeria_monocytogenes_1639_v191 | 0.941  |
| Listeria_monocytogenes_1639_v70                          | Listeria_monocytogenes_1639_v191 | 0.9498 |
| Listeria_monocytogenes_1639_v6                           | Listeria_monocytogenes_1639_v191 | 0.9349 |
| Listeria_monocytogenes_1639_v69                          | Listeria_monocytogenes_1639_v191 | 0.9362 |
| Listeria_monocytogenes_1639_v68                          | Listeria_monocytogenes_1639_v191 | 0.9636 |
| Listeria_monocytogenes_1639_v67                          | Listeria_monocytogenes_1639_v191 | 0.9396 |
| Listeria_monocytogenes_1639_v66                          | Listeria_monocytogenes_1639_v191 | 0.9681 |
| Listeria_monocytogenes_1639_v65                          | Listeria_monocytogenes_1639_v191 | 0.9498 |
| Listeria_monocytogenes_1639_v64                          | Listeria_monocytogenes_1639_v191 | 0.958  |
| Listeria_monocytogenes_1639_v63                          | Listeria_monocytogenes_1639_v191 | 0.935  |
| Listeria_monocytogenes_1639_v62                          | Listeria_monocytogenes_1639_v191 | 0.9535 |
| Listeria_monocytogenes_1639_v61                          | Listeria_monocytogenes_1639_v191 | 0.9498 |
| Listeria_monocytogenes_1639_v60                          | Listeria_monocytogenes_1639_v191 | 0.961  |
| Listeria_monocytogenes_1639_v5                           | Listeria_monocytogenes_1639_v191 | 0.9002 |
| Listeria_monocytogenes_1639_v59                          | Listeria_monocytogenes_1639_v191 | 0.9387 |
| Listeria_monocytogenes_1639_v58                          | Listeria_monocytogenes_1639_v191 | 0.9361 |
| Listeria_monocytogenes_1639_v57                          | Listeria_monocytogenes_1639_v191 | 0.93   |
| Listeria_monocytogenes_1639_v56                          | Listeria_monocytogenes_1639_v191 | 0.9387 |
| Listeria_monocytogenes_1639_v55                          | Listeria_monocytogenes_1639_v191 | 0.9261 |
| Listeria_monocytogenes_1639_v54                          | Listeria_monocytogenes_1639_v191 | 0.9302 |
| Listeria_monocytogenes_1639_v53                          | Listeria_monocytogenes_1639_v191 | 0.9587 |
| Listeria_monocytogenes_1639_v52                          | Listeria_monocytogenes_1639_v191 | 0.9355 |
| Listeria_monocytogenes_1639_v51                          | Listeria_monocytogenes_1639_v191 | 0.9338 |
| Listeria_monocytogenes_1639_v50                          | Listeria_monocytogenes_1639_v191 | 0.9454 |
| Listeria_monocytogenes_1639_v4                           | Listeria_monocytogenes_1639_v191 | 0.9132 |
| Listeria_monocytogenes_1639_v49                          | Listeria_monocytogenes_1639_v191 | 0.9354 |
| Listeria_monocytogenes_1639_v48                          | Listeria_monocytogenes_1639_v191 | 0.9477 |
| Listeria_monocytogenes_1639_v47                          | Listeria_monocytogenes_1639_v191 | 0.9466 |
| Listeria_monocytogenes_1639_v46                          | Listeria_monocytogenes_1639_v191 | 0.9629 |
| Listeria_monocytogenes_1639_v45                          | Listeria_monocytogenes_1639_v191 | 0.9367 |

|                                                          |                                  |        |
|----------------------------------------------------------|----------------------------------|--------|
| Listeria_monocytogenes_1639_v44                          | Listeria_monocytogenes_1639_v191 | 0.9469 |
| Listeria_monocytogenes_1639_v43                          | Listeria_monocytogenes_1639_v191 | 0.9469 |
| Listeria_monocytogenes_1639_v42                          | Listeria_monocytogenes_1639_v191 | 0.9454 |
| Listeria_monocytogenes_1639_v41                          | Listeria_monocytogenes_1639_v191 | 0.93   |
| Listeria_monocytogenes_1639_v40                          | Listeria_monocytogenes_1639_v191 | 0.9524 |
| Listeria_monocytogenes_1639_v3                           | Listeria_monocytogenes_1639_v191 | 0.9136 |
| Listeria_monocytogenes_1639_v39                          | Listeria_monocytogenes_1639_v191 | 0.9346 |
| Listeria_monocytogenes_1639_v38                          | Listeria_monocytogenes_1639_v191 | 0.9495 |
| Listeria_monocytogenes_1639_v37                          | Listeria_monocytogenes_1639_v191 | 0.9448 |
| Listeria_monocytogenes_1639_v36                          | Listeria_monocytogenes_1639_v191 | 0.9476 |
| Listeria_monocytogenes_1639_v35                          | Listeria_monocytogenes_1639_v191 | 0.9531 |
| Listeria_monocytogenes_1639_v34                          | Listeria_monocytogenes_1639_v191 | 0.9549 |
| Listeria_monocytogenes_1639_v33                          | Listeria_monocytogenes_1639_v191 | 0.9343 |
| Listeria_monocytogenes_1639_v32                          | Listeria_monocytogenes_1639_v191 | 0.9434 |
| Listeria_monocytogenes_1639_v31                          | Listeria_monocytogenes_1639_v191 | 0.9552 |
| Listeria_monocytogenes_1639_v30                          | Listeria_monocytogenes_1639_v191 | 0.9395 |
| Listeria_monocytogenes_1639_v2                           | Listeria_monocytogenes_1639_v191 | 0.9042 |
| Listeria_monocytogenes_1639_v29                          | Listeria_monocytogenes_1639_v191 | 0.9388 |
| Listeria_monocytogenes_1639_v28                          | Listeria_monocytogenes_1639_v191 | 0.9434 |
| Listeria_monocytogenes_1639_v27                          | Listeria_monocytogenes_1639_v191 | 0.9343 |
| Listeria_monocytogenes_1639_v26                          | Listeria_monocytogenes_1639_v191 | 0.9339 |
| Listeria_monocytogenes_1639_v25                          | Listeria_monocytogenes_1639_v191 | 0.9336 |
| Listeria_monocytogenes_1639_v24                          | Listeria_monocytogenes_1639_v191 | 0.9291 |
| Listeria_monocytogenes_1639_v23                          | Listeria_monocytogenes_1639_v191 | 0.9291 |
| Listeria_monocytogenes_1639_v22                          | Listeria_monocytogenes_1639_v191 | 0.9357 |
| Listeria_monocytogenes_1639_v21                          | Listeria_monocytogenes_1639_v191 | 0.9291 |
| Listeria_monocytogenes_1639_v20                          | Listeria_monocytogenes_1639_v191 | 0.9332 |
| Listeria_monocytogenes_1639_v1                           | Listeria_monocytogenes_1639_v191 | 0.9371 |
| Listeria_monocytogenes_1639_v19                          | Listeria_monocytogenes_1639_v191 | 0.9328 |
| Listeria_monocytogenes_1639_v198                         | Listeria_monocytogenes_1639_v191 | 0.9226 |
| Listeria_monocytogenes_1639_v197                         | Listeria_monocytogenes_1639_v191 | 0.9483 |
| Listeria_monocytogenes_1639_v196                         | Listeria_monocytogenes_1639_v191 | 0.9529 |
| Listeria_monocytogenes_1639_v195                         | Listeria_monocytogenes_1639_v191 | 0.9571 |
| Listeria_monocytogenes_1639_v194                         | Listeria_monocytogenes_1639_v191 | 0.9536 |
| Listeria_monocytogenes_1639_v193                         | Listeria_monocytogenes_1639_v191 | 0.954  |
| Listeria_monocytogenes_1639_v192                         | Listeria_monocytogenes_1639_v191 | 0.9102 |
| Listeria_monocytogenes_1639_v191                         | Listeria_monocytogenes_1639_v191 | 0.0635 |
| Listeria_welshimeri_1643                                 | Listeria_monocytogenes_1639_v192 | 0.8724 |
| Listeria_welshimeri_serovar_6b_str_SLCC5334_386043       | Listeria_monocytogenes_1639_v192 | 0.8721 |
| Listeria_seeligeri_serovar_1_2b_str_SLCC3954_683837      | Listeria_monocytogenes_1639_v192 | 0.8649 |
| Listeria_seeligeri_FSL_S4-171_702452                     | Listeria_monocytogenes_1639_v192 | 0.8132 |
| Listeria_seeligeri_FSL_N1-067_702453                     | Listeria_monocytogenes_1639_v192 | 0.8137 |
| Listeria_seeligeri_1640_v1                               | Listeria_monocytogenes_1639_v192 | 0.873  |
| Listeria_seeligeri_1640                                  | Listeria_monocytogenes_1639_v192 | 0.8642 |
| Listeria_monocytogenes_WSLC1042_1457188                  | Listeria_monocytogenes_1639_v192 | 0.9089 |
| Listeria_monocytogenes_WSLC1001_1457187                  | Listeria_monocytogenes_1639_v192 | 0.8973 |
| Listeria_monocytogenes_SLCC7179_879090                   | Listeria_monocytogenes_1639_v192 | 0.9017 |
| Listeria_monocytogenes_SLCC5850_882096                   | Listeria_monocytogenes_1639_v192 | 0.901  |
| Listeria_monocytogenes_SLCC2755_932919                   | Listeria_monocytogenes_1639_v192 | 0.8958 |
| Listeria_monocytogenes_SLCC2540_879089                   | Listeria_monocytogenes_1639_v192 | 0.8984 |
| Listeria_monocytogenes_SLCC2479_882020                   | Listeria_monocytogenes_1639_v192 | 0.8924 |
| Listeria_monocytogenes_SLCC2378_879088                   | Listeria_monocytogenes_1639_v192 | 0.9099 |
| Listeria_monocytogenes_SLCC2376_882097                   | Listeria_monocytogenes_1639_v192 | 0.9202 |
| Listeria_monocytogenes_SLCC2372_932920                   | Listeria_monocytogenes_1639_v192 | 0.8862 |
| Listeria_monocytogenes_serotype_4b_str_LL195_1230340     | Listeria_monocytogenes_1639_v192 | 0.9143 |
| Listeria_monocytogenes_serotype_4b_str_LIS0087_1134669   | Listeria_monocytogenes_1639_v192 | 0.878  |
| Listeria_monocytogenes_serotype_4b_str_F2365_265669      | Listeria_monocytogenes_1639_v192 | 0.9143 |
| Listeria_monocytogenes_serotype_4b_str_CLIP_80459_568819 | Listeria_monocytogenes_1639_v192 | 0.9153 |
| Listeria_monocytogenes_serotype_4b_str_81-0861_1196161   | Listeria_monocytogenes_1639_v192 | 0.9009 |
| Listeria_monocytogenes_serotype_4b_str_81-0592_1196160   | Listeria_monocytogenes_1639_v192 | 0.9019 |
| Listeria_monocytogenes_serotype_4b_str_81-0558_1196159   | Listeria_monocytogenes_1639_v192 | 0.9022 |
| Listeria_monocytogenes_serotype_4b_str_10-0809_1196162   | Listeria_monocytogenes_1639_v192 | 0.9019 |
| Listeria_monocytogenes_serotype_4b_str_02-6680_1196175   | Listeria_monocytogenes_1639_v192 | 0.9182 |
| Listeria_monocytogenes_serotype_4b_str_02-6679_1196174   | Listeria_monocytogenes_1639_v192 | 0.9182 |
| Listeria_monocytogenes_serotype_4b_str_02-1792_1196173   | Listeria_monocytogenes_1639_v192 | 0.9015 |
| Listeria_monocytogenes_serotype_4b_str_02-1289_1196172   | Listeria_monocytogenes_1639_v192 | 0.9015 |
| Listeria_monocytogenes_serotype_4b_str_02-1103_1196171   | Listeria_monocytogenes_1639_v192 | 0.9015 |
| Listeria_monocytogenes_serotype_3c_str_10-5027_1196195   | Listeria_monocytogenes_1639_v192 | 0.8905 |
| Listeria_monocytogenes_serotype_1_2c_str_10-5026_1196194 | Listeria_monocytogenes_1639_v192 | 0.8913 |
| Listeria_monocytogenes_serotype_1_2c_str_10-5025_1196193 | Listeria_monocytogenes_1639_v192 | 0.8913 |
| Listeria_monocytogenes_serotype_1_2b_str_10-0811_1196164 | Listeria_monocytogenes_1639_v192 | 0.8914 |
| Listeria_monocytogenes_serotype_1_2b_str_10-0810_1196163 | Listeria_monocytogenes_1639_v192 | 0.8914 |
| Listeria_monocytogenes_serotype_1_2a_str_99-6370_1196179 | Listeria_monocytogenes_1639_v192 | 0.8802 |
| Listeria_monocytogenes_serotype_1_2a_str_98-2035_1196178 | Listeria_monocytogenes_1639_v192 | 0.8802 |
| Listeria_monocytogenes_serotype_1_2a_str_95-0093_1196177 | Listeria_monocytogenes_1639_v192 | 0.8835 |
| Listeria_monocytogenes_serotype_1_2a_str_88-0478_1196176 | Listeria_monocytogenes_1639_v192 | 0.8824 |
| Listeria_monocytogenes_serotype_1_2a_str_10-5024_1196192 | Listeria_monocytogenes_1639_v192 | 0.8839 |
| Listeria_monocytogenes_serotype_1_2a_str_10-4758_1196168 | Listeria_monocytogenes_1639_v192 | 0.8977 |
| Listeria_monocytogenes_serotype_1_2a_str_10-4754_1196167 | Listeria_monocytogenes_1639_v192 | 0.8981 |
| Listeria_monocytogenes_serotype_1_2a_str_10-1321_1196191 | Listeria_monocytogenes_1639_v192 | 0.8839 |
| Listeria_monocytogenes_serotype_1_2a_str_10-1047_1196190 | Listeria_monocytogenes_1639_v192 | 0.8845 |
| Listeria_monocytogenes_serotype_1_2a_str_10-1046_1196189 | Listeria_monocytogenes_1639_v192 | 0.8845 |
| Listeria_monocytogenes_serotype_1_2a_str_10-0934_1196170 | Listeria_monocytogenes_1639_v192 | 0.9109 |
| Listeria_monocytogenes_serotype_1_2a_str_10-0933_1196169 | Listeria_monocytogenes_1639_v192 | 0.9109 |
| Listeria_monocytogenes_serotype_1_2a_str_10-0815_1196188 | Listeria_monocytogenes_1639_v192 | 0.8815 |
| Listeria_monocytogenes_serotype_1_2a_str_10-0814_1196187 | Listeria_monocytogenes_1639_v192 | 0.8839 |
| Listeria_monocytogenes_serotype_1_2a_str_10-0813_1196166 | Listeria_monocytogenes_1639_v192 | 0.8961 |
| Listeria_monocytogenes_serotype_1_2a_str_10-0812_1196165 | Listeria_monocytogenes_1639_v192 | 0.8961 |
| Listeria_monocytogenes_serotype_1_2a_str_08-7669_1196186 | Listeria_monocytogenes_1639_v192 | 0.8916 |
| Listeria_monocytogenes_serotype_1_2a_str_08-7374_1196185 | Listeria_monocytogenes_1639_v192 | 0.8839 |
| Listeria_monocytogenes_serotype_1_2a_str_08-6997_1196184 | Listeria_monocytogenes_1639_v192 | 0.8815 |



|                                                          |                                  |        |
|----------------------------------------------------------|----------------------------------|--------|
| Listeria_monocytogenes_serotype_1_2a_str_08-6569_1196183 | Listeria_monocytogenes_1639_v192 | 0.8815 |
| Listeria_monocytogenes_serotype_1_2a_str_08-6056_1196182 | Listeria_monocytogenes_1639_v192 | 0.8815 |
| Listeria_monocytogenes_serotype_1_2a_str_04-5457_1196181 | Listeria_monocytogenes_1639_v192 | 0.8839 |
| Listeria_monocytogenes_serotype_1_2a_str_02-5993_1196180 | Listeria_monocytogenes_1639_v192 | 0.8839 |
| Listeria_monocytogenes_R479a_1437838                     | Listeria_monocytogenes_1639_v192 | 0.8836 |
| Listeria_monocytogenes_N53-1_1234142                     | Listeria_monocytogenes_1639_v192 | 0.8602 |
| Listeria_monocytogenes_M7_1030009                        | Listeria_monocytogenes_1639_v192 | 0.8925 |
| Listeria_monocytogenes_LO28_393132                       | Listeria_monocytogenes_1639_v192 | 0.8907 |
| Listeria_monocytogenes_L99_563174                        | Listeria_monocytogenes_1639_v192 | 0.8929 |
| Listeria_monocytogenes_L312_882094                       | Listeria_monocytogenes_1639_v192 | 0.9153 |
| Listeria_monocytogenes_J1816_930781                      | Listeria_monocytogenes_1639_v192 | 0.8949 |
| Listeria_monocytogenes_J1-220_930782                     | Listeria_monocytogenes_1639_v192 | 0.8986 |
| Listeria_monocytogenes_J0161_393130                      | Listeria_monocytogenes_1639_v192 | 0.8907 |
| Listeria_monocytogenes_HCC23_552536                      | Listeria_monocytogenes_1639_v192 | 0.8925 |
| Listeria_monocytogenes_FSL_R2-561_393126                 | Listeria_monocytogenes_1639_v192 | 0.8907 |
| Listeria_monocytogenes_FSL_J1-208_393119                 | Listeria_monocytogenes_1639_v192 | 0.9653 |
| Listeria_monocytogenes_FSL_J1-175_393118                 | Listeria_monocytogenes_1639_v192 | 0.904  |
| Listeria_monocytogenes_Finland_1998_393127               | Listeria_monocytogenes_1639_v192 | 0.9055 |
| Listeria_monocytogenes_EGD-e_169963_v1                   | Listeria_monocytogenes_1639_v192 | 0.9001 |
| Listeria_monocytogenes_EGD-e_169963                      | Listeria_monocytogenes_1639_v192 | 0.9001 |
| Listeria_monocytogenes_EGD_1334565                       | Listeria_monocytogenes_1639_v192 | 0.9017 |
| Listeria_monocytogenes_CFSAN002349_1299895               | Listeria_monocytogenes_1639_v192 | 0.9129 |
| Listeria_monocytogenes_ATCC_19117_882095_v1              | Listeria_monocytogenes_1639_v192 | 0.9153 |
| Listeria_monocytogenes_ATCC_19117_882095                 | Listeria_monocytogenes_1639_v192 | 0.915  |
| Listeria_monocytogenes_6179_1288295                      | Listeria_monocytogenes_1639_v192 | 0.882  |
| Listeria_monocytogenes_1639_v9                           | Listeria_monocytogenes_1639_v192 | 0.8804 |
| Listeria_monocytogenes_1639_v99                          | Listeria_monocytogenes_1639_v192 | 0.8968 |
| Listeria_monocytogenes_1639_v98                          | Listeria_monocytogenes_1639_v192 | 0.8939 |
| Listeria_monocytogenes_1639_v97                          | Listeria_monocytogenes_1639_v192 | 0.9015 |
| Listeria_monocytogenes_1639_v96                          | Listeria_monocytogenes_1639_v192 | 0.8961 |
| Listeria_monocytogenes_1639_v95                          | Listeria_monocytogenes_1639_v192 | 0.8961 |
| Listeria_monocytogenes_1639_v94                          | Listeria_monocytogenes_1639_v192 | 0.8968 |
| Listeria_monocytogenes_1639_v93                          | Listeria_monocytogenes_1639_v192 | 0.8853 |
| Listeria_monocytogenes_1639_v92                          | Listeria_monocytogenes_1639_v192 | 0.8964 |
| Listeria_monocytogenes_1639_v91                          | Listeria_monocytogenes_1639_v192 | 0.8985 |
| Listeria_monocytogenes_1639_v90                          | Listeria_monocytogenes_1639_v192 | 0.8939 |
| Listeria_monocytogenes_1639_v8                           | Listeria_monocytogenes_1639_v192 | 0.8725 |
| Listeria_monocytogenes_1639_v89                          | Listeria_monocytogenes_1639_v192 | 0.9098 |
| Listeria_monocytogenes_1639_v88                          | Listeria_monocytogenes_1639_v192 | 0.8955 |
| Listeria_monocytogenes_1639_v87                          | Listeria_monocytogenes_1639_v192 | 0.8914 |
| Listeria_monocytogenes_1639_v86                          | Listeria_monocytogenes_1639_v192 | 0.8911 |
| Listeria_monocytogenes_1639_v85                          | Listeria_monocytogenes_1639_v192 | 0.9013 |
| Listeria_monocytogenes_1639_v84                          | Listeria_monocytogenes_1639_v192 | 0.8926 |
| Listeria_monocytogenes_1639_v83                          | Listeria_monocytogenes_1639_v192 | 0.9062 |
| Listeria_monocytogenes_1639_v82                          | Listeria_monocytogenes_1639_v192 | 0.9056 |
| Listeria_monocytogenes_1639_v81                          | Listeria_monocytogenes_1639_v192 | 0.8899 |
| Listeria_monocytogenes_1639_v80                          | Listeria_monocytogenes_1639_v192 | 0.8949 |
| Listeria_monocytogenes_1639_v7                           | Listeria_monocytogenes_1639_v192 | 0.8725 |
| Listeria_monocytogenes_1639_v79                          | Listeria_monocytogenes_1639_v192 | 0.889  |
| Listeria_monocytogenes_1639_v78                          | Listeria_monocytogenes_1639_v192 | 0.8892 |
| Listeria_monocytogenes_1639_v77                          | Listeria_monocytogenes_1639_v192 | 0.8933 |
| Listeria_monocytogenes_1639_v76                          | Listeria_monocytogenes_1639_v192 | 0.8856 |
| Listeria_monocytogenes_1639_v75                          | Listeria_monocytogenes_1639_v192 | 0.8929 |
| Listeria_monocytogenes_1639_v74                          | Listeria_monocytogenes_1639_v192 | 0.8933 |
| Listeria_monocytogenes_1639_v73                          | Listeria_monocytogenes_1639_v192 | 0.8857 |
| Listeria_monocytogenes_1639_v72                          | Listeria_monocytogenes_1639_v192 | 0.905  |
| Listeria_monocytogenes_1639_v71                          | Listeria_monocytogenes_1639_v192 | 0.8801 |
| Listeria_monocytogenes_1639_v70                          | Listeria_monocytogenes_1639_v192 | 0.8891 |
| Listeria_monocytogenes_1639_v6                           | Listeria_monocytogenes_1639_v192 | 0.8722 |
| Listeria_monocytogenes_1639_v69                          | Listeria_monocytogenes_1639_v192 | 0.9019 |
| Listeria_monocytogenes_1639_v68                          | Listeria_monocytogenes_1639_v192 | 0.8954 |
| Listeria_monocytogenes_1639_v67                          | Listeria_monocytogenes_1639_v192 | 0.8981 |
| Listeria_monocytogenes_1639_v66                          | Listeria_monocytogenes_1639_v192 | 0.8979 |
| Listeria_monocytogenes_1639_v65                          | Listeria_monocytogenes_1639_v192 | 0.8858 |
| Listeria_monocytogenes_1639_v64                          | Listeria_monocytogenes_1639_v192 | 0.8938 |
| Listeria_monocytogenes_1639_v63                          | Listeria_monocytogenes_1639_v192 | 0.8912 |
| Listeria_monocytogenes_1639_v62                          | Listeria_monocytogenes_1639_v192 | 0.8878 |
| Listeria_monocytogenes_1639_v61                          | Listeria_monocytogenes_1639_v192 | 0.8842 |
| Listeria_monocytogenes_1639_v60                          | Listeria_monocytogenes_1639_v192 | 0.891  |
| Listeria_monocytogenes_1639_v5                           | Listeria_monocytogenes_1639_v192 | 0.8633 |
| Listeria_monocytogenes_1639_v59                          | Listeria_monocytogenes_1639_v192 | 0.9066 |
| Listeria_monocytogenes_1639_v58                          | Listeria_monocytogenes_1639_v192 | 0.9058 |
| Listeria_monocytogenes_1639_v57                          | Listeria_monocytogenes_1639_v192 | 0.8932 |
| Listeria_monocytogenes_1639_v56                          | Listeria_monocytogenes_1639_v192 | 0.9073 |
| Listeria_monocytogenes_1639_v55                          | Listeria_monocytogenes_1639_v192 | 0.8895 |
| Listeria_monocytogenes_1639_v54                          | Listeria_monocytogenes_1639_v192 | 0.9003 |
| Listeria_monocytogenes_1639_v53                          | Listeria_monocytogenes_1639_v192 | 0.8932 |
| Listeria_monocytogenes_1639_v52                          | Listeria_monocytogenes_1639_v192 | 0.9035 |
| Listeria_monocytogenes_1639_v51                          | Listeria_monocytogenes_1639_v192 | 0.9023 |
| Listeria_monocytogenes_1639_v50                          | Listeria_monocytogenes_1639_v192 | 0.8828 |
| Listeria_monocytogenes_1639_v4                           | Listeria_monocytogenes_1639_v192 | 0.8732 |
| Listeria_monocytogenes_1639_v49                          | Listeria_monocytogenes_1639_v192 | 0.9016 |
| Listeria_monocytogenes_1639_v48                          | Listeria_monocytogenes_1639_v192 | 0.8882 |
| Listeria_monocytogenes_1639_v47                          | Listeria_monocytogenes_1639_v192 | 0.8835 |
| Listeria_monocytogenes_1639_v46                          | Listeria_monocytogenes_1639_v192 | 0.8937 |
| Listeria_monocytogenes_1639_v45                          | Listeria_monocytogenes_1639_v192 | 0.8759 |
| Listeria_monocytogenes_1639_v44                          | Listeria_monocytogenes_1639_v192 | 0.8839 |
| Listeria_monocytogenes_1639_v43                          | Listeria_monocytogenes_1639_v192 | 0.8839 |
| Listeria_monocytogenes_1639_v42                          | Listeria_monocytogenes_1639_v192 | 0.8819 |
| Listeria_monocytogenes_1639_v41                          | Listeria_monocytogenes_1639_v192 | 0.8742 |
| Listeria_monocytogenes_1639_v40                          | Listeria_monocytogenes_1639_v192 | 0.8918 |

|                                                          |                                  |        |
|----------------------------------------------------------|----------------------------------|--------|
| Listeria_monocytogenes_1639_v3                           | Listeria_monocytogenes_1639_v192 | 0.8736 |
| Listeria_monocytogenes_1639_v39                          | Listeria_monocytogenes_1639_v192 | 0.8945 |
| Listeria_monocytogenes_1639_v38                          | Listeria_monocytogenes_1639_v192 | 0.8884 |
| Listeria_monocytogenes_1639_v37                          | Listeria_monocytogenes_1639_v192 | 0.885  |
| Listeria_monocytogenes_1639_v36                          | Listeria_monocytogenes_1639_v192 | 0.8844 |
| Listeria_monocytogenes_1639_v35                          | Listeria_monocytogenes_1639_v192 | 0.8928 |
| Listeria_monocytogenes_1639_v34                          | Listeria_monocytogenes_1639_v192 | 0.8871 |
| Listeria_monocytogenes_1639_v33                          | Listeria_monocytogenes_1639_v192 | 0.8914 |
| Listeria_monocytogenes_1639_v32                          | Listeria_monocytogenes_1639_v192 | 0.8825 |
| Listeria_monocytogenes_1639_v31                          | Listeria_monocytogenes_1639_v192 | 0.8874 |
| Listeria_monocytogenes_1639_v30                          | Listeria_monocytogenes_1639_v192 | 0.8938 |
| Listeria_monocytogenes_1639_v2                           | Listeria_monocytogenes_1639_v192 | 0.8643 |
| Listeria_monocytogenes_1639_v29                          | Listeria_monocytogenes_1639_v192 | 0.879  |
| Listeria_monocytogenes_1639_v28                          | Listeria_monocytogenes_1639_v192 | 0.8828 |
| Listeria_monocytogenes_1639_v27                          | Listeria_monocytogenes_1639_v192 | 0.8742 |
| Listeria_monocytogenes_1639_v26                          | Listeria_monocytogenes_1639_v192 | 0.8735 |
| Listeria_monocytogenes_1639_v25                          | Listeria_monocytogenes_1639_v192 | 0.8735 |
| Listeria_monocytogenes_1639_v24                          | Listeria_monocytogenes_1639_v192 | 0.8986 |
| Listeria_monocytogenes_1639_v23                          | Listeria_monocytogenes_1639_v192 | 0.8983 |
| Listeria_monocytogenes_1639_v22                          | Listeria_monocytogenes_1639_v192 | 0.8912 |
| Listeria_monocytogenes_1639_v21                          | Listeria_monocytogenes_1639_v192 | 0.8983 |
| Listeria_monocytogenes_1639_v20                          | Listeria_monocytogenes_1639_v192 | 0.8868 |
| Listeria_monocytogenes_1639_v1                           | Listeria_monocytogenes_1639_v192 | 0.8778 |
| Listeria_monocytogenes_1639_v19                          | Listeria_monocytogenes_1639_v192 | 0.8865 |
| Listeria_monocytogenes_1639_v198                         | Listeria_monocytogenes_1639_v192 | 0.8627 |
| Listeria_monocytogenes_1639_v197                         | Listeria_monocytogenes_1639_v192 | 0.8876 |
| Listeria_monocytogenes_1639_v196                         | Listeria_monocytogenes_1639_v192 | 0.884  |
| Listeria_monocytogenes_1639_v195                         | Listeria_monocytogenes_1639_v192 | 0.9178 |
| Listeria_monocytogenes_1639_v194                         | Listeria_monocytogenes_1639_v192 | 0.9206 |
| Listeria_monocytogenes_1639_v193                         | Listeria_monocytogenes_1639_v192 | 0.9206 |
| Listeria_monocytogenes_1639_v192                         | Listeria_monocytogenes_1639_v192 | 0.0578 |
| Listeria_welshimeri_1643                                 | Listeria_monocytogenes_1639_v193 | 0.8898 |
| Listeria_welshimeri_serovar_6b_str_SLCC5334_386043       | Listeria_monocytogenes_1639_v193 | 0.8891 |
| Listeria_seeligeri_serovar_1_2b_str_SLCC3954_683837      | Listeria_monocytogenes_1639_v193 | 0.8933 |
| Listeria_seeligeri_FSL_S4-171_702452                     | Listeria_monocytogenes_1639_v193 | 0.8316 |
| Listeria_seeligeri_FSL_N1-067_702453                     | Listeria_monocytogenes_1639_v193 | 0.8282 |
| Listeria_seeligeri_1640_v1                               | Listeria_monocytogenes_1639_v193 | 0.8893 |
| Listeria_seeligeri_1640                                  | Listeria_monocytogenes_1639_v193 | 0.8873 |
| Listeria_monocytogenes_WSLC1042_1457188                  | Listeria_monocytogenes_1639_v193 | 0.9396 |
| Listeria_monocytogenes_WSLC1001_1457187                  | Listeria_monocytogenes_1639_v193 | 0.9391 |
| Listeria_monocytogenes_SLCC7179_879090                   | Listeria_monocytogenes_1639_v193 | 0.9443 |
| Listeria_monocytogenes_SLCC5850_882096                   | Listeria_monocytogenes_1639_v193 | 0.9434 |
| Listeria_monocytogenes_SLCC2755_932919                   | Listeria_monocytogenes_1639_v193 | 0.9301 |
| Listeria_monocytogenes_SLCC2540_879089                   | Listeria_monocytogenes_1639_v193 | 0.9371 |
| Listeria_monocytogenes_SLCC2479_882020                   | Listeria_monocytogenes_1639_v193 | 0.933  |
| Listeria_monocytogenes_SLCC2378_879088                   | Listeria_monocytogenes_1639_v193 | 0.9411 |
| Listeria_monocytogenes_SLCC2376_882097                   | Listeria_monocytogenes_1639_v193 | 0.9984 |
| Listeria_monocytogenes_SLCC2372_932920                   | Listeria_monocytogenes_1639_v193 | 0.9252 |
| Listeria_monocytogenes_serotype_4b_str_LL195_1230340     | Listeria_monocytogenes_1639_v193 | 0.9469 |
| Listeria_monocytogenes_serotype_4b_str_LIS0087_1134669   | Listeria_monocytogenes_1639_v193 | 0.9187 |
| Listeria_monocytogenes_serotype_4b_str_F2365_265669      | Listeria_monocytogenes_1639_v193 | 0.9469 |
| Listeria_monocytogenes_serotype_4b_str_CLIP_80459_568819 | Listeria_monocytogenes_1639_v193 | 0.9515 |
| Listeria_monocytogenes_serotype_4b_str_81-0861_1196161   | Listeria_monocytogenes_1639_v193 | 0.9299 |
| Listeria_monocytogenes_serotype_4b_str_81-0592_1196160   | Listeria_monocytogenes_1639_v193 | 0.931  |
| Listeria_monocytogenes_serotype_4b_str_81-0558_1196159   | Listeria_monocytogenes_1639_v193 | 0.9317 |
| Listeria_monocytogenes_serotype_4b_str_10-0809_1196162   | Listeria_monocytogenes_1639_v193 | 0.931  |
| Listeria_monocytogenes_serotype_4b_str_02-6680_1196175   | Listeria_monocytogenes_1639_v193 | 0.9446 |
| Listeria_monocytogenes_serotype_4b_str_02-6679_1196174   | Listeria_monocytogenes_1639_v193 | 0.9446 |
| Listeria_monocytogenes_serotype_4b_str_02-1792_1196173   | Listeria_monocytogenes_1639_v193 | 0.9309 |
| Listeria_monocytogenes_serotype_4b_str_02-1289_1196172   | Listeria_monocytogenes_1639_v193 | 0.9309 |
| Listeria_monocytogenes_serotype_4b_str_02-1103_1196171   | Listeria_monocytogenes_1639_v193 | 0.9309 |
| Listeria_monocytogenes_serotype_3c_str_10-5027_1196195   | Listeria_monocytogenes_1639_v193 | 0.9318 |
| Listeria_monocytogenes_serotype_1_2c_str_10-5026_1196194 | Listeria_monocytogenes_1639_v193 | 0.933  |
| Listeria_monocytogenes_serotype_1_2c_str_10-5025_1196193 | Listeria_monocytogenes_1639_v193 | 0.933  |
| Listeria_monocytogenes_serotype_1_2b_str_10-0811_1196164 | Listeria_monocytogenes_1639_v193 | 0.9276 |
| Listeria_monocytogenes_serotype_1_2b_str_10-0810_1196163 | Listeria_monocytogenes_1639_v193 | 0.9276 |
| Listeria_monocytogenes_serotype_1_2a_str_99-6370_1196179 | Listeria_monocytogenes_1639_v193 | 0.9161 |
| Listeria_monocytogenes_serotype_1_2a_str_98-2035_1196178 | Listeria_monocytogenes_1639_v193 | 0.9161 |
| Listeria_monocytogenes_serotype_1_2a_str_95-0093_1196177 | Listeria_monocytogenes_1639_v193 | 0.9221 |
| Listeria_monocytogenes_serotype_1_2a_str_88-0478_1196176 | Listeria_monocytogenes_1639_v193 | 0.9212 |
| Listeria_monocytogenes_serotype_1_2a_str_10-5024_1196192 | Listeria_monocytogenes_1639_v193 | 0.9224 |
| Listeria_monocytogenes_serotype_1_2a_str_10-4758_1196168 | Listeria_monocytogenes_1639_v193 | 0.9373 |
| Listeria_monocytogenes_serotype_1_2a_str_10-4754_1196167 | Listeria_monocytogenes_1639_v193 | 0.9373 |
| Listeria_monocytogenes_serotype_1_2a_str_10-1321_1196191 | Listeria_monocytogenes_1639_v193 | 0.9224 |
| Listeria_monocytogenes_serotype_1_2a_str_10-1047_1196190 | Listeria_monocytogenes_1639_v193 | 0.9228 |
| Listeria_monocytogenes_serotype_1_2a_str_10-1046_1196189 | Listeria_monocytogenes_1639_v193 | 0.9228 |
| Listeria_monocytogenes_serotype_1_2a_str_10-0934_1196170 | Listeria_monocytogenes_1639_v193 | 0.9534 |
| Listeria_monocytogenes_serotype_1_2a_str_10-0933_1196169 | Listeria_monocytogenes_1639_v193 | 0.9534 |
| Listeria_monocytogenes_serotype_1_2a_str_10-0815_1196188 | Listeria_monocytogenes_1639_v193 | 0.9175 |
| Listeria_monocytogenes_serotype_1_2a_str_10-0814_1196187 | Listeria_monocytogenes_1639_v193 | 0.9221 |
| Listeria_monocytogenes_serotype_1_2a_str_10-0813_1196166 | Listeria_monocytogenes_1639_v193 | 0.9358 |
| Listeria_monocytogenes_serotype_1_2a_str_10-0812_1196165 | Listeria_monocytogenes_1639_v193 | 0.9358 |
| Listeria_monocytogenes_serotype_1_2a_str_08-7669_1196186 | Listeria_monocytogenes_1639_v193 | 0.932  |
| Listeria_monocytogenes_serotype_1_2a_str_08-7374_1196185 | Listeria_monocytogenes_1639_v193 | 0.9224 |
| Listeria_monocytogenes_serotype_1_2a_str_08-6997_1196184 | Listeria_monocytogenes_1639_v193 | 0.9175 |
| Listeria_monocytogenes_serotype_1_2a_str_08-6569_1196183 | Listeria_monocytogenes_1639_v193 | 0.9175 |
| Listeria_monocytogenes_serotype_1_2a_str_08-6056_1196182 | Listeria_monocytogenes_1639_v193 | 0.9175 |
| Listeria_monocytogenes_serotype_1_2a_str_04-5457_1196181 | Listeria_monocytogenes_1639_v193 | 0.9224 |
| Listeria_monocytogenes_serotype_1_2a_str_02-5993_1196180 | Listeria_monocytogenes_1639_v193 | 0.9221 |
| Listeria_monocytogenes_R479a_1437838                     | Listeria_monocytogenes_1639_v193 | 0.9217 |
| Listeria_monocytogenes_N53-1_1234142                     | Listeria_monocytogenes_1639_v193 | 0.8989 |



|                                                          |                                  |        |
|----------------------------------------------------------|----------------------------------|--------|
| Listeria_monocytogenes_1639_v34                          | Listeria_monocytogenes_1639_v193 | 0.9246 |
| Listeria_monocytogenes_1639_v33                          | Listeria_monocytogenes_1639_v193 | 0.9276 |
| Listeria_monocytogenes_1639_v32                          | Listeria_monocytogenes_1639_v193 | 0.9223 |
| Listeria_monocytogenes_1639_v31                          | Listeria_monocytogenes_1639_v193 | 0.925  |
| Listeria_monocytogenes_1639_v30                          | Listeria_monocytogenes_1639_v193 | 0.9267 |
| Listeria_monocytogenes_1639_v2                           | Listeria_monocytogenes_1639_v193 | 0.8892 |
| Listeria_monocytogenes_1639_v29                          | Listeria_monocytogenes_1639_v193 | 0.9182 |
| Listeria_monocytogenes_1639_v28                          | Listeria_monocytogenes_1639_v193 | 0.9227 |
| Listeria_monocytogenes_1639_v27                          | Listeria_monocytogenes_1639_v193 | 0.9134 |
| Listeria_monocytogenes_1639_v26                          | Listeria_monocytogenes_1639_v193 | 0.9131 |
| Listeria_monocytogenes_1639_v25                          | Listeria_monocytogenes_1639_v193 | 0.9127 |
| Listeria_monocytogenes_1639_v24                          | Listeria_monocytogenes_1639_v193 | 0.9224 |
| Listeria_monocytogenes_1639_v23                          | Listeria_monocytogenes_1639_v193 | 0.9224 |
| Listeria_monocytogenes_1639_v22                          | Listeria_monocytogenes_1639_v193 | 0.9286 |
| Listeria_monocytogenes_1639_v21                          | Listeria_monocytogenes_1639_v193 | 0.922  |
| Listeria_monocytogenes_1639_v20                          | Listeria_monocytogenes_1639_v193 | 0.917  |
| Listeria_monocytogenes_1639_v1                           | Listeria_monocytogenes_1639_v193 | 0.9084 |
| Listeria_monocytogenes_1639_v19                          | Listeria_monocytogenes_1639_v193 | 0.9167 |
| Listeria_monocytogenes_1639_v198                         | Listeria_monocytogenes_1639_v193 | 0.9012 |
| Listeria_monocytogenes_1639_v197                         | Listeria_monocytogenes_1639_v193 | 0.9279 |
| Listeria_monocytogenes_1639_v196                         | Listeria_monocytogenes_1639_v193 | 0.9275 |
| Listeria_monocytogenes_1639_v195                         | Listeria_monocytogenes_1639_v193 | 0.9866 |
| Listeria_monocytogenes_1639_v194                         | Listeria_monocytogenes_1639_v193 | 0.9992 |
| Listeria_monocytogenes_1639_v193                         | Listeria_monocytogenes_1639_v193 | 0.0651 |
| Listeria_welshimeri_1643                                 | Listeria_monocytogenes_1639_v194 | 0.8898 |
| Listeria_welshimeri_serovar_6b_str_SLCC5334_386043       | Listeria_monocytogenes_1639_v194 | 0.8891 |
| Listeria_seeligeri_serovar_1_2b_str_SLCC3954_683837      | Listeria_monocytogenes_1639_v194 | 0.8933 |
| Listeria_seeligeri_FSL_S4-171_702452                     | Listeria_monocytogenes_1639_v194 | 0.832  |
| Listeria_seeligeri_FSL_N1-067_702453                     | Listeria_monocytogenes_1639_v194 | 0.8285 |
| Listeria_seeligeri_1640_v1                               | Listeria_monocytogenes_1639_v194 | 0.8901 |
| Listeria_seeligeri_1640                                  | Listeria_monocytogenes_1639_v194 | 0.8873 |
| Listeria_monocytogenes_WSLC1042_1457188                  | Listeria_monocytogenes_1639_v194 | 0.9396 |
| Listeria_monocytogenes_WSLC1001_1457187                  | Listeria_monocytogenes_1639_v194 | 0.9387 |
| Listeria_monocytogenes_SLCC7179_879090                   | Listeria_monocytogenes_1639_v194 | 0.9439 |
| Listeria_monocytogenes_SLCC5850_882096                   | Listeria_monocytogenes_1639_v194 | 0.943  |
| Listeria_monocytogenes_SLCC2755_932919                   | Listeria_monocytogenes_1639_v194 | 0.9301 |
| Listeria_monocytogenes_SLCC2540_879089                   | Listeria_monocytogenes_1639_v194 | 0.9371 |
| Listeria_monocytogenes_SLCC2479_882020                   | Listeria_monocytogenes_1639_v194 | 0.9326 |
| Listeria_monocytogenes_SLCC2378_879088                   | Listeria_monocytogenes_1639_v194 | 0.9411 |
| Listeria_monocytogenes_SLCC2376_882097                   | Listeria_monocytogenes_1639_v194 | 0.9984 |
| Listeria_monocytogenes_SLCC2372_932920                   | Listeria_monocytogenes_1639_v194 | 0.9248 |
| Listeria_monocytogenes_serotype_4b_str_LL195_1230340     | Listeria_monocytogenes_1639_v194 | 0.9469 |
| Listeria_monocytogenes_serotype_4b_str_LIS0087_1134669   | Listeria_monocytogenes_1639_v194 | 0.9183 |
| Listeria_monocytogenes_serotype_4b_str_F2365_265669      | Listeria_monocytogenes_1639_v194 | 0.9469 |
| Listeria_monocytogenes_serotype_4b_str_CLIP_80459_568819 | Listeria_monocytogenes_1639_v194 | 0.9515 |
| Listeria_monocytogenes_serotype_4b_str_81-0861_1196161   | Listeria_monocytogenes_1639_v194 | 0.9299 |
| Listeria_monocytogenes_serotype_4b_str_81-0592_1196160   | Listeria_monocytogenes_1639_v194 | 0.931  |
| Listeria_monocytogenes_serotype_4b_str_81-0558_1196159   | Listeria_monocytogenes_1639_v194 | 0.9317 |
| Listeria_monocytogenes_serotype_4b_str_10-0809_1196162   | Listeria_monocytogenes_1639_v194 | 0.931  |
| Listeria_monocytogenes_serotype_4b_str_02-6680_1196175   | Listeria_monocytogenes_1639_v194 | 0.9446 |
| Listeria_monocytogenes_serotype_4b_str_02-6679_1196174   | Listeria_monocytogenes_1639_v194 | 0.9446 |
| Listeria_monocytogenes_serotype_4b_str_02-1792_1196173   | Listeria_monocytogenes_1639_v194 | 0.9309 |
| Listeria_monocytogenes_serotype_4b_str_02-1289_1196172   | Listeria_monocytogenes_1639_v194 | 0.9309 |
| Listeria_monocytogenes_serotype_4b_str_02-1103_1196171   | Listeria_monocytogenes_1639_v194 | 0.9309 |
| Listeria_monocytogenes_serotype_3c_str_10-5027_1196195   | Listeria_monocytogenes_1639_v194 | 0.9314 |
| Listeria_monocytogenes_serotype_1_2c_str_10-5026_1196194 | Listeria_monocytogenes_1639_v194 | 0.9326 |
| Listeria_monocytogenes_serotype_1_2c_str_10-5025_1196193 | Listeria_monocytogenes_1639_v194 | 0.9326 |
| Listeria_monocytogenes_serotype_1_2b_str_10-0811_1196164 | Listeria_monocytogenes_1639_v194 | 0.9276 |
| Listeria_monocytogenes_serotype_1_2b_str_10-0810_1196163 | Listeria_monocytogenes_1639_v194 | 0.9276 |
| Listeria_monocytogenes_serotype_1_2a_str_99-6370_1196179 | Listeria_monocytogenes_1639_v194 | 0.9158 |
| Listeria_monocytogenes_serotype_1_2a_str_98-2035_1196178 | Listeria_monocytogenes_1639_v194 | 0.9158 |
| Listeria_monocytogenes_serotype_1_2a_str_95-0093_1196177 | Listeria_monocytogenes_1639_v194 | 0.9217 |
| Listeria_monocytogenes_serotype_1_2a_str_88-0478_1196176 | Listeria_monocytogenes_1639_v194 | 0.9209 |
| Listeria_monocytogenes_serotype_1_2a_str_10-5024_1196192 | Listeria_monocytogenes_1639_v194 | 0.922  |
| Listeria_monocytogenes_serotype_1_2a_str_10-4758_1196168 | Listeria_monocytogenes_1639_v194 | 0.9369 |
| Listeria_monocytogenes_serotype_1_2a_str_10-4754_1196167 | Listeria_monocytogenes_1639_v194 | 0.9369 |
| Listeria_monocytogenes_serotype_1_2a_str_10-1321_1196191 | Listeria_monocytogenes_1639_v194 | 0.922  |
| Listeria_monocytogenes_serotype_1_2a_str_10-1047_1196190 | Listeria_monocytogenes_1639_v194 | 0.9224 |
| Listeria_monocytogenes_serotype_1_2a_str_10-1046_1196189 | Listeria_monocytogenes_1639_v194 | 0.9224 |
| Listeria_monocytogenes_serotype_1_2a_str_10-0934_1196170 | Listeria_monocytogenes_1639_v194 | 0.953  |
| Listeria_monocytogenes_serotype_1_2a_str_10-0933_1196169 | Listeria_monocytogenes_1639_v194 | 0.953  |
| Listeria_monocytogenes_serotype_1_2a_str_10-0815_1196188 | Listeria_monocytogenes_1639_v194 | 0.9171 |
| Listeria_monocytogenes_serotype_1_2a_str_10-0814_1196187 | Listeria_monocytogenes_1639_v194 | 0.9217 |
| Listeria_monocytogenes_serotype_1_2a_str_10-0813_1196166 | Listeria_monocytogenes_1639_v194 | 0.9354 |
| Listeria_monocytogenes_serotype_1_2a_str_10-0812_1196165 | Listeria_monocytogenes_1639_v194 | 0.9354 |
| Listeria_monocytogenes_serotype_1_2a_str_08-7669_1196186 | Listeria_monocytogenes_1639_v194 | 0.9316 |
| Listeria_monocytogenes_serotype_1_2a_str_08-7374_1196185 | Listeria_monocytogenes_1639_v194 | 0.922  |
| Listeria_monocytogenes_serotype_1_2a_str_08-6997_1196184 | Listeria_monocytogenes_1639_v194 | 0.9171 |
| Listeria_monocytogenes_serotype_1_2a_str_08-6569_1196183 | Listeria_monocytogenes_1639_v194 | 0.9171 |
| Listeria_monocytogenes_serotype_1_2a_str_08-6056_1196182 | Listeria_monocytogenes_1639_v194 | 0.9171 |
| Listeria_monocytogenes_serotype_1_2a_str_04-5457_1196181 | Listeria_monocytogenes_1639_v194 | 0.922  |
| Listeria_monocytogenes_serotype_1_2a_str_02-5993_1196180 | Listeria_monocytogenes_1639_v194 | 0.9217 |
| Listeria_monocytogenes_R479a_1437838                     | Listeria_monocytogenes_1639_v194 | 0.9214 |
| Listeria_monocytogenes_N53-1_1234142                     | Listeria_monocytogenes_1639_v194 | 0.8985 |
| Listeria_monocytogenes_M7_1030009                        | Listeria_monocytogenes_1639_v194 | 0.929  |
| Listeria_monocytogenes_LO28_393132                       | Listeria_monocytogenes_1639_v194 | 0.9312 |
| Listeria_monocytogenes_L99_563174                        | Listeria_monocytogenes_1639_v194 | 0.9297 |
| Listeria_monocytogenes_L312_882094                       | Listeria_monocytogenes_1639_v194 | 0.9515 |
| Listeria_monocytogenes_J1816_930781                      | Listeria_monocytogenes_1639_v194 | 0.9282 |
| Listeria_monocytogenes_J1-220_930782                     | Listeria_monocytogenes_1639_v194 | 0.9224 |
| Listeria_monocytogenes_J0161_393130                      | Listeria_monocytogenes_1639_v194 | 0.9277 |

[illegible]

|                                                          |                                  |        |
|----------------------------------------------------------|----------------------------------|--------|
| Listeria_monocytogenes_1639_v28                          | Listeria_monocytogenes_1639_v194 | 0.9223 |
| Listeria_monocytogenes_1639_v27                          | Listeria_monocytogenes_1639_v194 | 0.913  |
| Listeria_monocytogenes_1639_v26                          | Listeria_monocytogenes_1639_v194 | 0.9127 |
| Listeria_monocytogenes_1639_v25                          | Listeria_monocytogenes_1639_v194 | 0.9124 |
| Listeria_monocytogenes_1639_v24                          | Listeria_monocytogenes_1639_v194 | 0.9224 |
| Listeria_monocytogenes_1639_v23                          | Listeria_monocytogenes_1639_v194 | 0.9224 |
| Listeria_monocytogenes_1639_v22                          | Listeria_monocytogenes_1639_v194 | 0.9286 |
| Listeria_monocytogenes_1639_v21                          | Listeria_monocytogenes_1639_v194 | 0.922  |
| Listeria_monocytogenes_1639_v20                          | Listeria_monocytogenes_1639_v194 | 0.917  |
| Listeria_monocytogenes_1639_v1                           | Listeria_monocytogenes_1639_v194 | 0.9081 |
| Listeria_monocytogenes_1639_v19                          | Listeria_monocytogenes_1639_v194 | 0.9167 |
| Listeria_monocytogenes_1639_v198                         | Listeria_monocytogenes_1639_v194 | 0.9009 |
| Listeria_monocytogenes_1639_v197                         | Listeria_monocytogenes_1639_v194 | 0.9275 |
| Listeria_monocytogenes_1639_v196                         | Listeria_monocytogenes_1639_v194 | 0.9271 |
| Listeria_monocytogenes_1639_v195                         | Listeria_monocytogenes_1639_v194 | 0.987  |
| Listeria_monocytogenes_1639_v194                         | Listeria_monocytogenes_1639_v194 | 0.0651 |
| Listeria_welshimeri_1643                                 | Listeria_monocytogenes_1639_v195 | 0.8889 |
| Listeria_welshimeri_serovar_6b_str_SLCC5334_386043       | Listeria_monocytogenes_1639_v195 | 0.8885 |
| Listeria_seeligeri_serovar_1_2b_str_SLCC3954_683837      | Listeria_monocytogenes_1639_v195 | 0.8963 |
| Listeria_seeligeri_FSL_S4-171_702452                     | Listeria_monocytogenes_1639_v195 | 0.8314 |
| Listeria_seeligeri_FSL_N1-067_702453                     | Listeria_monocytogenes_1639_v195 | 0.8291 |
| Listeria_seeligeri_1640_v1                               | Listeria_monocytogenes_1639_v195 | 0.8918 |
| Listeria_seeligeri_1640                                  | Listeria_monocytogenes_1639_v195 | 0.8876 |
| Listeria_monocytogenes_WSLC1042_1457188                  | Listeria_monocytogenes_1639_v195 | 0.9418 |
| Listeria_monocytogenes_WSLC1001_1457187                  | Listeria_monocytogenes_1639_v195 | 0.9405 |
| Listeria_monocytogenes_SLCC7179_879090                   | Listeria_monocytogenes_1639_v195 | 0.9454 |
| Listeria_monocytogenes_SLCC5850_882096                   | Listeria_monocytogenes_1639_v195 | 0.9449 |
| Listeria_monocytogenes_SLCC2755_932919                   | Listeria_monocytogenes_1639_v195 | 0.9312 |
| Listeria_monocytogenes_SLCC2540_879089                   | Listeria_monocytogenes_1639_v195 | 0.9359 |
| Listeria_monocytogenes_SLCC2479_882020                   | Listeria_monocytogenes_1639_v195 | 0.9352 |
| Listeria_monocytogenes_SLCC2378_879088                   | Listeria_monocytogenes_1639_v195 | 0.9429 |
| Listeria_monocytogenes_SLCC2376_882097                   | Listeria_monocytogenes_1639_v195 | 0.9862 |
| Listeria_monocytogenes_SLCC2372_932920                   | Listeria_monocytogenes_1639_v195 | 0.9273 |
| Listeria_monocytogenes_serotype_4b_str_LL195_1230340     | Listeria_monocytogenes_1639_v195 | 0.9488 |
| Listeria_monocytogenes_serotype_4b_str_LIS0087_1134669   | Listeria_monocytogenes_1639_v195 | 0.9213 |
| Listeria_monocytogenes_serotype_4b_str_F2365_265669      | Listeria_monocytogenes_1639_v195 | 0.9488 |
| Listeria_monocytogenes_serotype_4b_str_CLIP_80459_568819 | Listeria_monocytogenes_1639_v195 | 0.9511 |
| Listeria_monocytogenes_serotype_4b_str_81-0861_1196161   | Listeria_monocytogenes_1639_v195 | 0.9321 |
| Listeria_monocytogenes_serotype_4b_str_81-0592_1196160   | Listeria_monocytogenes_1639_v195 | 0.9332 |
| Listeria_monocytogenes_serotype_4b_str_81-0558_1196159   | Listeria_monocytogenes_1639_v195 | 0.9335 |
| Listeria_monocytogenes_serotype_4b_str_10-0809_1196162   | Listeria_monocytogenes_1639_v195 | 0.9332 |
| Listeria_monocytogenes_serotype_4b_str_02-6680_1196175   | Listeria_monocytogenes_1639_v195 | 0.9465 |
| Listeria_monocytogenes_serotype_4b_str_02-6679_1196174   | Listeria_monocytogenes_1639_v195 | 0.9465 |
| Listeria_monocytogenes_serotype_4b_str_02-1792_1196173   | Listeria_monocytogenes_1639_v195 | 0.9328 |
| Listeria_monocytogenes_serotype_4b_str_02-1289_1196172   | Listeria_monocytogenes_1639_v195 | 0.9328 |
| Listeria_monocytogenes_serotype_4b_str_02-1103_1196171   | Listeria_monocytogenes_1639_v195 | 0.9328 |
| Listeria_monocytogenes_serotype_3c_str_10-5027_1196195   | Listeria_monocytogenes_1639_v195 | 0.934  |
| Listeria_monocytogenes_serotype_1_2c_str_10-5026_1196194 | Listeria_monocytogenes_1639_v195 | 0.9348 |
| Listeria_monocytogenes_serotype_1_2c_str_10-5025_1196193 | Listeria_monocytogenes_1639_v195 | 0.9348 |
| Listeria_monocytogenes_serotype_1_2b_str_10-0811_1196164 | Listeria_monocytogenes_1639_v195 | 0.9282 |
| Listeria_monocytogenes_serotype_1_2b_str_10-0810_1196163 | Listeria_monocytogenes_1639_v195 | 0.9282 |
| Listeria_monocytogenes_serotype_1_2a_str_99-6370_1196179 | Listeria_monocytogenes_1639_v195 | 0.9179 |
| Listeria_monocytogenes_serotype_1_2a_str_98-2035_1196178 | Listeria_monocytogenes_1639_v195 | 0.9179 |
| Listeria_monocytogenes_serotype_1_2a_str_95-0093_1196177 | Listeria_monocytogenes_1639_v195 | 0.9238 |
| Listeria_monocytogenes_serotype_1_2a_str_88-0478_1196176 | Listeria_monocytogenes_1639_v195 | 0.9227 |
| Listeria_monocytogenes_serotype_1_2a_str_10-5024_1196192 | Listeria_monocytogenes_1639_v195 | 0.9238 |
| Listeria_monocytogenes_serotype_1_2a_str_10-4758_1196168 | Listeria_monocytogenes_1639_v195 | 0.9396 |
| Listeria_monocytogenes_serotype_1_2a_str_10-4754_1196167 | Listeria_monocytogenes_1639_v195 | 0.9399 |
| Listeria_monocytogenes_serotype_1_2a_str_10-1321_1196191 | Listeria_monocytogenes_1639_v195 | 0.9238 |
| Listeria_monocytogenes_serotype_1_2a_str_10-1047_1196190 | Listeria_monocytogenes_1639_v195 | 0.9245 |
| Listeria_monocytogenes_serotype_1_2a_str_10-1046_1196189 | Listeria_monocytogenes_1639_v195 | 0.9245 |
| Listeria_monocytogenes_serotype_1_2a_str_10-0934_1196170 | Listeria_monocytogenes_1639_v195 | 0.9552 |
| Listeria_monocytogenes_serotype_1_2a_str_10-0933_1196169 | Listeria_monocytogenes_1639_v195 | 0.9552 |
| Listeria_monocytogenes_serotype_1_2a_str_10-0815_1196188 | Listeria_monocytogenes_1639_v195 | 0.9193 |
| Listeria_monocytogenes_serotype_1_2a_str_10-0814_1196187 | Listeria_monocytogenes_1639_v195 | 0.9238 |
| Listeria_monocytogenes_serotype_1_2a_str_10-0813_1196166 | Listeria_monocytogenes_1639_v195 | 0.9376 |
| Listeria_monocytogenes_serotype_1_2a_str_10-0812_1196165 | Listeria_monocytogenes_1639_v195 | 0.9376 |
| Listeria_monocytogenes_serotype_1_2a_str_08-7669_1196186 | Listeria_monocytogenes_1639_v195 | 0.9338 |
| Listeria_monocytogenes_serotype_1_2a_str_08-7374_1196185 | Listeria_monocytogenes_1639_v195 | 0.9238 |
| Listeria_monocytogenes_serotype_1_2a_str_08-6997_1196184 | Listeria_monocytogenes_1639_v195 | 0.9193 |
| Listeria_monocytogenes_serotype_1_2a_str_08-6569_1196183 | Listeria_monocytogenes_1639_v195 | 0.9193 |
| Listeria_monocytogenes_serotype_1_2a_str_08-6056_1196182 | Listeria_monocytogenes_1639_v195 | 0.9193 |
| Listeria_monocytogenes_serotype_1_2a_str_04-5457_1196181 | Listeria_monocytogenes_1639_v195 | 0.9238 |
| Listeria_monocytogenes_serotype_1_2a_str_02-5993_1196180 | Listeria_monocytogenes_1639_v195 | 0.9238 |
| Listeria_monocytogenes_R479a_1437838                     | Listeria_monocytogenes_1639_v195 | 0.9231 |
| Listeria_monocytogenes_N53-1_1234142                     | Listeria_monocytogenes_1639_v195 | 0.901  |
| Listeria_monocytogenes_M7_1030009                        | Listeria_monocytogenes_1639_v195 | 0.9259 |
| Listeria_monocytogenes_LO28_393132                       | Listeria_monocytogenes_1639_v195 | 0.9338 |
| Listeria_monocytogenes_L99_563174                        | Listeria_monocytogenes_1639_v195 | 0.9262 |
| Listeria_monocytogenes_L312_882094                       | Listeria_monocytogenes_1639_v195 | 0.9511 |
| Listeria_monocytogenes_J1816_930781                      | Listeria_monocytogenes_1639_v195 | 0.9285 |
| Listeria_monocytogenes_J1-220_930782                     | Listeria_monocytogenes_1639_v195 | 0.9234 |
| Listeria_monocytogenes_J0161_393130                      | Listeria_monocytogenes_1639_v195 | 0.9311 |
| Listeria_monocytogenes_HCC23_552536                      | Listeria_monocytogenes_1639_v195 | 0.9255 |
| Listeria_monocytogenes_FSL_R2-561_393126                 | Listeria_monocytogenes_1639_v195 | 0.9334 |
| Listeria_monocytogenes_FSL_J1-208_393119                 | Listeria_monocytogenes_1639_v195 | 0.9259 |
| Listeria_monocytogenes_FSL_J1-175_393118                 | Listeria_monocytogenes_1639_v195 | 0.9375 |
| Listeria_monocytogenes_Finland_1998_393127               | Listeria_monocytogenes_1639_v195 | 0.9537 |
| Listeria_monocytogenes_EGD-e_169963_v1                   | Listeria_monocytogenes_1639_v195 | 0.9431 |
| Listeria_monocytogenes_EGD-e_169963                      | Listeria_monocytogenes_1639_v195 | 0.9431 |
| Listeria_monocytogenes_EGD_1334565                       | Listeria_monocytogenes_1639_v195 | 0.9457 |



[illegible]

|                                                          |                                  |        |
|----------------------------------------------------------|----------------------------------|--------|
| Listeria_monocytogenes_1639_v20                          | Listeria_monocytogenes_1639_v195 | 0.9184 |
| Listeria_monocytogenes_1639_v1                           | Listeria_monocytogenes_1639_v195 | 0.9091 |
| Listeria_monocytogenes_1639_v19                          | Listeria_monocytogenes_1639_v195 | 0.9181 |
| Listeria_monocytogenes_1639_v198                         | Listeria_monocytogenes_1639_v195 | 0.903  |
| Listeria_monocytogenes_1639_v197                         | Listeria_monocytogenes_1639_v195 | 0.9297 |
| Listeria_monocytogenes_1639_v196                         | Listeria_monocytogenes_1639_v195 | 0.929  |
| Listeria_monocytogenes_1639_v195                         | Listeria_monocytogenes_1639_v195 | 0.0645 |
| Listeria_welshimeri_1643                                 | Listeria_monocytogenes_1639_v196 | 0.8634 |
| Listeria_welshimeri_serovar_6b_str_SLCC5334_386043       | Listeria_monocytogenes_1639_v196 | 0.8628 |
| Listeria_seeligeri_serovar_1_2b_str_SLCC3954_683837      | Listeria_monocytogenes_1639_v196 | 0.8667 |
| Listeria_seeligeri_FSL_S4-171_702452                     | Listeria_monocytogenes_1639_v196 | 0.8038 |
| Listeria_seeligeri_FSL_N1-067_702453                     | Listeria_monocytogenes_1639_v196 | 0.818  |
| Listeria_seeligeri_1640_v1                               | Listeria_monocytogenes_1639_v196 | 0.8637 |
| Listeria_seeligeri_1640                                  | Listeria_monocytogenes_1639_v196 | 0.8601 |
| Listeria_monocytogenes_WSLC1042_1457188                  | Listeria_monocytogenes_1639_v196 | 0.9123 |
| Listeria_monocytogenes_WSLC1001_1457187                  | Listeria_monocytogenes_1639_v196 | 0.9773 |
| Listeria_monocytogenes_SLCC7179_879090                   | Listeria_monocytogenes_1639_v196 | 0.9425 |
| Listeria_monocytogenes_SLCC5850_882096                   | Listeria_monocytogenes_1639_v196 | 0.9826 |
| Listeria_monocytogenes_SLCC2755_932919                   | Listeria_monocytogenes_1639_v196 | 0.9175 |
| Listeria_monocytogenes_SLCC2540_879089                   | Listeria_monocytogenes_1639_v196 | 0.931  |
| Listeria_monocytogenes_SLCC2479_882020                   | Listeria_monocytogenes_1639_v196 | 0.9385 |
| Listeria_monocytogenes_SLCC2378_879088                   | Listeria_monocytogenes_1639_v196 | 0.9137 |
| Listeria_monocytogenes_SLCC2376_882097                   | Listeria_monocytogenes_1639_v196 | 0.9267 |
| Listeria_monocytogenes_SLCC2372_932920                   | Listeria_monocytogenes_1639_v196 | 0.931  |
| Listeria_monocytogenes_serotype_4b_str_LL195_1230340     | Listeria_monocytogenes_1639_v196 | 0.9197 |
| Listeria_monocytogenes_serotype_4b_str_LIS0087_1134669   | Listeria_monocytogenes_1639_v196 | 0.9477 |
| Listeria_monocytogenes_serotype_4b_str_F2365_265669      | Listeria_monocytogenes_1639_v196 | 0.9197 |
| Listeria_monocytogenes_serotype_4b_str_CLIP_80459_568819 | Listeria_monocytogenes_1639_v196 | 0.9266 |
| Listeria_monocytogenes_serotype_4b_str_81-0861_1196161   | Listeria_monocytogenes_1639_v196 | 0.9051 |
| Listeria_monocytogenes_serotype_4b_str_81-0592_1196160   | Listeria_monocytogenes_1639_v196 | 0.9062 |
| Listeria_monocytogenes_serotype_4b_str_81-0558_1196159   | Listeria_monocytogenes_1639_v196 | 0.9072 |
| Listeria_monocytogenes_serotype_4b_str_10-0809_1196162   | Listeria_monocytogenes_1639_v196 | 0.9065 |
| Listeria_monocytogenes_serotype_4b_str_02-6680_1196175   | Listeria_monocytogenes_1639_v196 | 0.9249 |
| Listeria_monocytogenes_serotype_4b_str_02-6679_1196174   | Listeria_monocytogenes_1639_v196 | 0.9249 |
| Listeria_monocytogenes_serotype_4b_str_02-1792_1196173   | Listeria_monocytogenes_1639_v196 | 0.9065 |
| Listeria_monocytogenes_serotype_4b_str_02-1289_1196172   | Listeria_monocytogenes_1639_v196 | 0.9065 |
| Listeria_monocytogenes_serotype_4b_str_02-1103_1196171   | Listeria_monocytogenes_1639_v196 | 0.9065 |
| Listeria_monocytogenes_serotype_3c_str_10-5027_1196195   | Listeria_monocytogenes_1639_v196 | 0.9396 |
| Listeria_monocytogenes_serotype_1_2c_str_10-5026_1196194 | Listeria_monocytogenes_1639_v196 | 0.9403 |
| Listeria_monocytogenes_serotype_1_2c_str_10-5025_1196193 | Listeria_monocytogenes_1639_v196 | 0.9403 |
| Listeria_monocytogenes_serotype_1_2b_str_10-0811_1196164 | Listeria_monocytogenes_1639_v196 | 0.9227 |
| Listeria_monocytogenes_serotype_1_2b_str_10-0810_1196163 | Listeria_monocytogenes_1639_v196 | 0.9227 |
| Listeria_monocytogenes_serotype_1_2a_str_99-6370_1196179 | Listeria_monocytogenes_1639_v196 | 0.931  |
| Listeria_monocytogenes_serotype_1_2a_str_98-2035_1196178 | Listeria_monocytogenes_1639_v196 | 0.931  |
| Listeria_monocytogenes_serotype_1_2a_str_95-0093_1196177 | Listeria_monocytogenes_1639_v196 | 0.9355 |
| Listeria_monocytogenes_serotype_1_2a_str_88-0478_1196176 | Listeria_monocytogenes_1639_v196 | 0.9358 |
| Listeria_monocytogenes_serotype_1_2a_str_10-5024_1196192 | Listeria_monocytogenes_1639_v196 | 0.9362 |
| Listeria_monocytogenes_serotype_1_2a_str_10-4758_1196168 | Listeria_monocytogenes_1639_v196 | 0.9517 |
| Listeria_monocytogenes_serotype_1_2a_str_10-4754_1196167 | Listeria_monocytogenes_1639_v196 | 0.9517 |
| Listeria_monocytogenes_serotype_1_2a_str_10-1321_1196191 | Listeria_monocytogenes_1639_v196 | 0.9362 |
| Listeria_monocytogenes_serotype_1_2a_str_10-1047_1196190 | Listeria_monocytogenes_1639_v196 | 0.9366 |
| Listeria_monocytogenes_serotype_1_2a_str_10-1046_1196189 | Listeria_monocytogenes_1639_v196 | 0.9366 |
| Listeria_monocytogenes_serotype_1_2a_str_10-0934_1196170 | Listeria_monocytogenes_1639_v196 | 0.9566 |
| Listeria_monocytogenes_serotype_1_2a_str_10-0933_1196169 | Listeria_monocytogenes_1639_v196 | 0.9566 |
| Listeria_monocytogenes_serotype_1_2a_str_10-0815_1196188 | Listeria_monocytogenes_1639_v196 | 0.932  |
| Listeria_monocytogenes_serotype_1_2a_str_10-0814_1196187 | Listeria_monocytogenes_1639_v196 | 0.9358 |
| Listeria_monocytogenes_serotype_1_2a_str_10-0813_1196166 | Listeria_monocytogenes_1639_v196 | 0.9628 |
| Listeria_monocytogenes_serotype_1_2a_str_10-0812_1196165 | Listeria_monocytogenes_1639_v196 | 0.9628 |
| Listeria_monocytogenes_serotype_1_2a_str_08-7669_1196186 | Listeria_monocytogenes_1639_v196 | 0.934  |
| Listeria_monocytogenes_serotype_1_2a_str_08-7374_1196185 | Listeria_monocytogenes_1639_v196 | 0.9362 |
| Listeria_monocytogenes_serotype_1_2a_str_08-6997_1196184 | Listeria_monocytogenes_1639_v196 | 0.932  |
| Listeria_monocytogenes_serotype_1_2a_str_08-6569_1196183 | Listeria_monocytogenes_1639_v196 | 0.932  |
| Listeria_monocytogenes_serotype_1_2a_str_08-6056_1196182 | Listeria_monocytogenes_1639_v196 | 0.932  |
| Listeria_monocytogenes_serotype_1_2a_str_04-5457_1196181 | Listeria_monocytogenes_1639_v196 | 0.9362 |
| Listeria_monocytogenes_serotype_1_2a_str_02-5993_1196180 | Listeria_monocytogenes_1639_v196 | 0.9358 |
| Listeria_monocytogenes_R479a_1437838                     | Listeria_monocytogenes_1639_v196 | 0.9336 |
| Listeria_monocytogenes_N53-1_1234142                     | Listeria_monocytogenes_1639_v196 | 0.8912 |
| Listeria_monocytogenes_M7_1030009                        | Listeria_monocytogenes_1639_v196 | 0.8973 |
| Listeria_monocytogenes_LO28_393132                       | Listeria_monocytogenes_1639_v196 | 0.937  |
| Listeria_monocytogenes_L99_563174                        | Listeria_monocytogenes_1639_v196 | 0.898  |
| Listeria_monocytogenes_L312_882094                       | Listeria_monocytogenes_1639_v196 | 0.9266 |
| Listeria_monocytogenes_J1816_930781                      | Listeria_monocytogenes_1639_v196 | 0.9081 |
| Listeria_monocytogenes_J1-220_930782                     | Listeria_monocytogenes_1639_v196 | 0.9107 |
| Listeria_monocytogenes_J0161_393130                      | Listeria_monocytogenes_1639_v196 | 0.9286 |
| Listeria_monocytogenes_HCC23_552536                      | Listeria_monocytogenes_1639_v196 | 0.8976 |
| Listeria_monocytogenes_FSL_R2-561_393126                 | Listeria_monocytogenes_1639_v196 | 0.9381 |
| Listeria_monocytogenes_FSL_J1-208_393119                 | Listeria_monocytogenes_1639_v196 | 0.8909 |
| Listeria_monocytogenes_FSL_J1-175_393118                 | Listeria_monocytogenes_1639_v196 | 0.9346 |
| Listeria_monocytogenes_Finland_1998_393127               | Listeria_monocytogenes_1639_v196 | 0.9448 |
| Listeria_monocytogenes_EGD-e_169963_v1                   | Listeria_monocytogenes_1639_v196 | 0.9368 |
| Listeria_monocytogenes_EGD-e_169963                      | Listeria_monocytogenes_1639_v196 | 0.9368 |
| Listeria_monocytogenes_EGD_1334565                       | Listeria_monocytogenes_1639_v196 | 0.9834 |
| Listeria_monocytogenes_CFSAN002349_1299895               | Listeria_monocytogenes_1639_v196 | 0.9246 |
| Listeria_monocytogenes_ATCC_19117_882095_v1              | Listeria_monocytogenes_1639_v196 | 0.9196 |
| Listeria_monocytogenes_ATCC_19117_882095                 | Listeria_monocytogenes_1639_v196 | 0.9196 |
| Listeria_monocytogenes_6179_1288295                      | Listeria_monocytogenes_1639_v196 | 0.9274 |
| Listeria_monocytogenes_1639_v9                           | Listeria_monocytogenes_1639_v196 | 0.9077 |
| Listeria_monocytogenes_1639_v99                          | Listeria_monocytogenes_1639_v196 | 0.9104 |
| Listeria_monocytogenes_1639_v98                          | Listeria_monocytogenes_1639_v196 | 0.93   |
| Listeria_monocytogenes_1639_v97                          | Listeria_monocytogenes_1639_v196 | 0.9154 |
| Listeria_monocytogenes_1639_v96                          | Listeria_monocytogenes_1639_v196 | 0.9078 |

[illegible]

|                                                          |                                  |        |
|----------------------------------------------------------|----------------------------------|--------|
| Listeria_seeligeri_FSL_S4-171_702452                     | Listeria_monocytogenes_1639_v197 | 0.8105 |
| Listeria_seeligeri_FSL_N1-067_702453                     | Listeria_monocytogenes_1639_v197 | 0.8184 |
| Listeria_seeligeri_1640_v1                               | Listeria_monocytogenes_1639_v197 | 0.8698 |
| Listeria_seeligeri_1640                                  | Listeria_monocytogenes_1639_v197 | 0.8708 |
| Listeria_monocytogenes_WSLC1042_1457188                  | Listeria_monocytogenes_1639_v197 | 0.9232 |
| Listeria_monocytogenes_WSLC1001_1457187                  | Listeria_monocytogenes_1639_v197 | 0.9381 |
| Listeria_monocytogenes_SLCC7179_879090                   | Listeria_monocytogenes_1639_v197 | 0.9518 |
| Listeria_monocytogenes_SLCC5850_882096                   | Listeria_monocytogenes_1639_v197 | 0.9404 |
| Listeria_monocytogenes_SLCC2755_932919                   | Listeria_monocytogenes_1639_v197 | 0.9186 |
| Listeria_monocytogenes_SLCC2540_879089                   | Listeria_monocytogenes_1639_v197 | 0.9272 |
| Listeria_monocytogenes_SLCC2479_882020                   | Listeria_monocytogenes_1639_v197 | 0.9567 |
| Listeria_monocytogenes_SLCC2378_879088                   | Listeria_monocytogenes_1639_v197 | 0.9231 |
| Listeria_monocytogenes_SLCC2376_882097                   | Listeria_monocytogenes_1639_v197 | 0.9271 |
| Listeria_monocytogenes_SLCC2372_932920                   | Listeria_monocytogenes_1639_v197 | 0.9493 |
| Listeria_monocytogenes_serotype_4b_str_LL195_1230340     | Listeria_monocytogenes_1639_v197 | 0.9268 |
| Listeria_monocytogenes_serotype_4b_str_LIS0087_1134669   | Listeria_monocytogenes_1639_v197 | 0.9282 |
| Listeria_monocytogenes_serotype_4b_str_F2365_265669      | Listeria_monocytogenes_1639_v197 | 0.9268 |
| Listeria_monocytogenes_serotype_4b_str_CLIP_80459_568819 | Listeria_monocytogenes_1639_v197 | 0.9293 |
| Listeria_monocytogenes_serotype_4b_str_81-0861_1196161   | Listeria_monocytogenes_1639_v197 | 0.9251 |
| Listeria_monocytogenes_serotype_4b_str_81-0592_1196160   | Listeria_monocytogenes_1639_v197 | 0.9261 |
| Listeria_monocytogenes_serotype_4b_str_81-0558_1196159   | Listeria_monocytogenes_1639_v197 | 0.9268 |
| Listeria_monocytogenes_serotype_4b_str_10-0809_1196162   | Listeria_monocytogenes_1639_v197 | 0.9261 |
| Listeria_monocytogenes_serotype_4b_str_02-6680_1196175   | Listeria_monocytogenes_1639_v197 | 0.9261 |
| Listeria_monocytogenes_serotype_4b_str_02-6679_1196174   | Listeria_monocytogenes_1639_v197 | 0.9261 |
| Listeria_monocytogenes_serotype_4b_str_02-1792_1196173   | Listeria_monocytogenes_1639_v197 | 0.928  |
| Listeria_monocytogenes_serotype_4b_str_02-1289_1196172   | Listeria_monocytogenes_1639_v197 | 0.928  |
| Listeria_monocytogenes_serotype_4b_str_02-1103_1196171   | Listeria_monocytogenes_1639_v197 | 0.928  |
| Listeria_monocytogenes_serotype_3c_str_10-5027_1196195   | Listeria_monocytogenes_1639_v197 | 0.9544 |
| Listeria_monocytogenes_serotype_1_2c_str_10-5026_1196194 | Listeria_monocytogenes_1639_v197 | 0.9555 |
| Listeria_monocytogenes_serotype_1_2c_str_10-5025_1196193 | Listeria_monocytogenes_1639_v197 | 0.9555 |
| Listeria_monocytogenes_serotype_1_2b_str_10-0811_1196164 | Listeria_monocytogenes_1639_v197 | 0.9299 |
| Listeria_monocytogenes_serotype_1_2b_str_10-0810_1196163 | Listeria_monocytogenes_1639_v197 | 0.9299 |
| Listeria_monocytogenes_serotype_1_2a_str_99-6370_1196179 | Listeria_monocytogenes_1639_v197 | 0.9254 |
| Listeria_monocytogenes_serotype_1_2a_str_98-2035_1196178 | Listeria_monocytogenes_1639_v197 | 0.9254 |
| Listeria_monocytogenes_serotype_1_2a_str_95-0093_1196177 | Listeria_monocytogenes_1639_v197 | 0.9301 |
| Listeria_monocytogenes_serotype_1_2a_str_88-0478_1196176 | Listeria_monocytogenes_1639_v197 | 0.93   |
| Listeria_monocytogenes_serotype_1_2a_str_10-5024_1196192 | Listeria_monocytogenes_1639_v197 | 0.9304 |
| Listeria_monocytogenes_serotype_1_2a_str_10-4758_1196168 | Listeria_monocytogenes_1639_v197 | 0.9431 |
| Listeria_monocytogenes_serotype_1_2a_str_10-4754_1196167 | Listeria_monocytogenes_1639_v197 | 0.9431 |
| Listeria_monocytogenes_serotype_1_2a_str_10-1321_1196191 | Listeria_monocytogenes_1639_v197 | 0.9304 |
| Listeria_monocytogenes_serotype_1_2a_str_10-1047_1196190 | Listeria_monocytogenes_1639_v197 | 0.9308 |
| Listeria_monocytogenes_serotype_1_2a_str_10-1046_1196189 | Listeria_monocytogenes_1639_v197 | 0.9308 |
| Listeria_monocytogenes_serotype_1_2a_str_10-0934_1196170 | Listeria_monocytogenes_1639_v197 | 0.9515 |
| Listeria_monocytogenes_serotype_1_2a_str_10-0933_1196169 | Listeria_monocytogenes_1639_v197 | 0.9515 |
| Listeria_monocytogenes_serotype_1_2a_str_10-0815_1196188 | Listeria_monocytogenes_1639_v197 | 0.926  |
| Listeria_monocytogenes_serotype_1_2a_str_10-0814_1196187 | Listeria_monocytogenes_1639_v197 | 0.9304 |
| Listeria_monocytogenes_serotype_1_2a_str_10-0813_1196166 | Listeria_monocytogenes_1639_v197 | 0.9491 |
| Listeria_monocytogenes_serotype_1_2a_str_10-0812_1196165 | Listeria_monocytogenes_1639_v197 | 0.9491 |
| Listeria_monocytogenes_serotype_1_2a_str_08-7669_1196186 | Listeria_monocytogenes_1639_v197 | 0.939  |
| Listeria_monocytogenes_serotype_1_2a_str_08-7374_1196185 | Listeria_monocytogenes_1639_v197 | 0.9304 |
| Listeria_monocytogenes_serotype_1_2a_str_08-6997_1196184 | Listeria_monocytogenes_1639_v197 | 0.926  |
| Listeria_monocytogenes_serotype_1_2a_str_08-6569_1196183 | Listeria_monocytogenes_1639_v197 | 0.926  |
| Listeria_monocytogenes_serotype_1_2a_str_08-6056_1196182 | Listeria_monocytogenes_1639_v197 | 0.926  |
| Listeria_monocytogenes_serotype_1_2a_str_04-5457_1196181 | Listeria_monocytogenes_1639_v197 | 0.9304 |
| Listeria_monocytogenes_serotype_1_2a_str_02-5993_1196180 | Listeria_monocytogenes_1639_v197 | 0.9301 |
| Listeria_monocytogenes_R479a_1437838                     | Listeria_monocytogenes_1639_v197 | 0.9261 |
| Listeria_monocytogenes_N53-1_1234142                     | Listeria_monocytogenes_1639_v197 | 0.9096 |
| Listeria_monocytogenes_M7_1030009                        | Listeria_monocytogenes_1639_v197 | 0.9019 |
| Listeria_monocytogenes_LO28_393132                       | Listeria_monocytogenes_1639_v197 | 0.9612 |
| Listeria_monocytogenes_L99_563174                        | Listeria_monocytogenes_1639_v197 | 0.9025 |
| Listeria_monocytogenes_L312_882094                       | Listeria_monocytogenes_1639_v197 | 0.9293 |
| Listeria_monocytogenes_J1816_930781                      | Listeria_monocytogenes_1639_v197 | 0.9157 |
| Listeria_monocytogenes_J1-220_930782                     | Listeria_monocytogenes_1639_v197 | 0.9186 |
| Listeria_monocytogenes_J0161_393130                      | Listeria_monocytogenes_1639_v197 | 0.9434 |
| Listeria_monocytogenes_HCC23_552536                      | Listeria_monocytogenes_1639_v197 | 0.9022 |
| Listeria_monocytogenes_FSL_R2-561_393126                 | Listeria_monocytogenes_1639_v197 | 0.9537 |
| Listeria_monocytogenes_FSL_J1-208_393119                 | Listeria_monocytogenes_1639_v197 | 0.8939 |
| Listeria_monocytogenes_FSL_J1-175_393118                 | Listeria_monocytogenes_1639_v197 | 0.9284 |
| Listeria_monocytogenes_Finland_1998_393127               | Listeria_monocytogenes_1639_v197 | 0.945  |
| Listeria_monocytogenes_EGD-e_169963_v1                   | Listeria_monocytogenes_1639_v197 | 0.9854 |
| Listeria_monocytogenes_EGD-e_169963                      | Listeria_monocytogenes_1639_v197 | 0.9854 |
| Listeria_monocytogenes_EGD_1334565                       | Listeria_monocytogenes_1639_v197 | 0.9411 |
| Listeria_monocytogenes_CFSAN002349_1299895               | Listeria_monocytogenes_1639_v197 | 0.9299 |
| Listeria_monocytogenes_ATCC_19117_882095_v1              | Listeria_monocytogenes_1639_v197 | 0.9229 |
| Listeria_monocytogenes_ATCC_19117_882095                 | Listeria_monocytogenes_1639_v197 | 0.9229 |
| Listeria_monocytogenes_6179_1288295                      | Listeria_monocytogenes_1639_v197 | 0.9292 |
| Listeria_monocytogenes_1639_v9                           | Listeria_monocytogenes_1639_v197 | 0.9141 |
| Listeria_monocytogenes_1639_v99                          | Listeria_monocytogenes_1639_v197 | 0.9179 |
| Listeria_monocytogenes_1639_v98                          | Listeria_monocytogenes_1639_v197 | 0.9437 |
| Listeria_monocytogenes_1639_v97                          | Listeria_monocytogenes_1639_v197 | 0.9214 |
| Listeria_monocytogenes_1639_v96                          | Listeria_monocytogenes_1639_v197 | 0.9161 |
| Listeria_monocytogenes_1639_v95                          | Listeria_monocytogenes_1639_v197 | 0.9162 |
| Listeria_monocytogenes_1639_v94                          | Listeria_monocytogenes_1639_v197 | 0.9161 |
| Listeria_monocytogenes_1639_v93                          | Listeria_monocytogenes_1639_v197 | 0.9289 |
| Listeria_monocytogenes_1639_v92                          | Listeria_monocytogenes_1639_v197 | 0.9183 |
| Listeria_monocytogenes_1639_v91                          | Listeria_monocytogenes_1639_v197 | 0.9237 |
| Listeria_monocytogenes_1639_v90                          | Listeria_monocytogenes_1639_v197 | 0.9437 |
| Listeria_monocytogenes_1639_v8                           | Listeria_monocytogenes_1639_v197 | 0.9182 |
| Listeria_monocytogenes_1639_v89                          | Listeria_monocytogenes_1639_v197 | 0.933  |
| Listeria_monocytogenes_1639_v88                          | Listeria_monocytogenes_1639_v197 | 0.9413 |
| Listeria_monocytogenes_1639_v87                          | Listeria_monocytogenes_1639_v197 | 0.9404 |

[illegible]

|                                                          |                                  |        |
|----------------------------------------------------------|----------------------------------|--------|
| Listeria_monocytogenes_SLCC2378_879088                   | Listeria_monocytogenes_1639_v198 | 0.8944 |
| Listeria_monocytogenes_SLCC2376_882097                   | Listeria_monocytogenes_1639_v198 | 0.9005 |
| Listeria_monocytogenes_SLCC2372_932920                   | Listeria_monocytogenes_1639_v198 | 0.9008 |
| Listeria_monocytogenes_serotype_4b_str_LL195_1230340     | Listeria_monocytogenes_1639_v198 | 0.8997 |
| Listeria_monocytogenes_serotype_4b_str_LIS0087_1134669   | Listeria_monocytogenes_1639_v198 | 0.8929 |
| Listeria_monocytogenes_serotype_4b_str_F2365_265669      | Listeria_monocytogenes_1639_v198 | 0.8997 |
| Listeria_monocytogenes_serotype_4b_str_CLIP_80459_568819 | Listeria_monocytogenes_1639_v198 | 0.9015 |
| Listeria_monocytogenes_serotype_4b_str_81-0861_1196161   | Listeria_monocytogenes_1639_v198 | 0.8901 |
| Listeria_monocytogenes_serotype_4b_str_81-0592_1196160   | Listeria_monocytogenes_1639_v198 | 0.8904 |
| Listeria_monocytogenes_serotype_4b_str_81-0558_1196159   | Listeria_monocytogenes_1639_v198 | 0.8914 |
| Listeria_monocytogenes_serotype_4b_str_10-0809_1196162   | Listeria_monocytogenes_1639_v198 | 0.8908 |
| Listeria_monocytogenes_serotype_4b_str_02-6680_1196175   | Listeria_monocytogenes_1639_v198 | 0.9002 |
| Listeria_monocytogenes_serotype_4b_str_02-6679_1196174   | Listeria_monocytogenes_1639_v198 | 0.9002 |
| Listeria_monocytogenes_serotype_4b_str_02-1792_1196173   | Listeria_monocytogenes_1639_v198 | 0.8911 |
| Listeria_monocytogenes_serotype_4b_str_02-1289_1196172   | Listeria_monocytogenes_1639_v198 | 0.8911 |
| Listeria_monocytogenes_serotype_4b_str_02-1103_1196171   | Listeria_monocytogenes_1639_v198 | 0.8911 |
| Listeria_monocytogenes_serotype_3c_str_10-5027_1196195   | Listeria_monocytogenes_1639_v198 | 0.9066 |
| Listeria_monocytogenes_serotype_1_2c_str_10-5026_1196194 | Listeria_monocytogenes_1639_v198 | 0.9077 |
| Listeria_monocytogenes_serotype_1_2c_str_10-5025_1196193 | Listeria_monocytogenes_1639_v198 | 0.9077 |
| Listeria_monocytogenes_serotype_1_2b_str_10-0811_1196164 | Listeria_monocytogenes_1639_v198 | 0.8928 |
| Listeria_monocytogenes_serotype_1_2b_str_10-0810_1196163 | Listeria_monocytogenes_1639_v198 | 0.8928 |
| Listeria_monocytogenes_serotype_1_2a_str_99-6370_1196179 | Listeria_monocytogenes_1639_v198 | 0.8894 |
| Listeria_monocytogenes_serotype_1_2a_str_98-2035_1196178 | Listeria_monocytogenes_1639_v198 | 0.8894 |
| Listeria_monocytogenes_serotype_1_2a_str_95-0093_1196177 | Listeria_monocytogenes_1639_v198 | 0.8949 |
| Listeria_monocytogenes_serotype_1_2a_str_88-0478_1196176 | Listeria_monocytogenes_1639_v198 | 0.8941 |
| Listeria_monocytogenes_serotype_1_2a_str_10-5024_1196192 | Listeria_monocytogenes_1639_v198 | 0.8953 |
| Listeria_monocytogenes_serotype_1_2a_str_10-4758_1196168 | Listeria_monocytogenes_1639_v198 | 0.9112 |
| Listeria_monocytogenes_serotype_1_2a_str_10-4754_1196167 | Listeria_monocytogenes_1639_v198 | 0.9109 |
| Listeria_monocytogenes_serotype_1_2a_str_10-1321_1196191 | Listeria_monocytogenes_1639_v198 | 0.8953 |
| Listeria_monocytogenes_serotype_1_2a_str_10-1047_1196190 | Listeria_monocytogenes_1639_v198 | 0.8956 |
| Listeria_monocytogenes_serotype_1_2a_str_10-1046_1196189 | Listeria_monocytogenes_1639_v198 | 0.8956 |
| Listeria_monocytogenes_serotype_1_2a_str_10-0934_1196170 | Listeria_monocytogenes_1639_v198 | 0.9209 |
| Listeria_monocytogenes_serotype_1_2a_str_10-0933_1196169 | Listeria_monocytogenes_1639_v198 | 0.9209 |
| Listeria_monocytogenes_serotype_1_2a_str_10-0815_1196188 | Listeria_monocytogenes_1639_v198 | 0.8907 |
| Listeria_monocytogenes_serotype_1_2a_str_10-0814_1196187 | Listeria_monocytogenes_1639_v198 | 0.8949 |
| Listeria_monocytogenes_serotype_1_2a_str_10-0813_1196166 | Listeria_monocytogenes_1639_v198 | 0.9092 |
| Listeria_monocytogenes_serotype_1_2a_str_10-0812_1196165 | Listeria_monocytogenes_1639_v198 | 0.9092 |
| Listeria_monocytogenes_serotype_1_2a_str_08-7669_1196186 | Listeria_monocytogenes_1639_v198 | 0.9041 |
| Listeria_monocytogenes_serotype_1_2a_str_08-7374_1196185 | Listeria_monocytogenes_1639_v198 | 0.8953 |
| Listeria_monocytogenes_serotype_1_2a_str_08-6997_1196184 | Listeria_monocytogenes_1639_v198 | 0.8907 |
| Listeria_monocytogenes_serotype_1_2a_str_08-6569_1196183 | Listeria_monocytogenes_1639_v198 | 0.8907 |
| Listeria_monocytogenes_serotype_1_2a_str_08-6056_1196182 | Listeria_monocytogenes_1639_v198 | 0.8907 |
| Listeria_monocytogenes_serotype_1_2a_str_04-5457_1196181 | Listeria_monocytogenes_1639_v198 | 0.8953 |
| Listeria_monocytogenes_serotype_1_2a_str_02-5993_1196180 | Listeria_monocytogenes_1639_v198 | 0.8949 |
| Listeria_monocytogenes_R479a_1437838                     | Listeria_monocytogenes_1639_v198 | 0.8928 |
| Listeria_monocytogenes_N53-1_1234142                     | Listeria_monocytogenes_1639_v198 | 0.9758 |
| Listeria_monocytogenes_M7_1030009                        | Listeria_monocytogenes_1639_v198 | 0.8687 |
| Listeria_monocytogenes_LO28_393132                       | Listeria_monocytogenes_1639_v198 | 0.9093 |
| Listeria_monocytogenes_L99_563174                        | Listeria_monocytogenes_1639_v198 | 0.8693 |
| Listeria_monocytogenes_L312_882094                       | Listeria_monocytogenes_1639_v198 | 0.9015 |
| Listeria_monocytogenes_J1816_930781                      | Listeria_monocytogenes_1639_v198 | 0.885  |
| Listeria_monocytogenes_J1-220_930782                     | Listeria_monocytogenes_1639_v198 | 0.8822 |
| Listeria_monocytogenes_J0161_393130                      | Listeria_monocytogenes_1639_v198 | 0.9075 |
| Listeria_monocytogenes_HCC23_552536                      | Listeria_monocytogenes_1639_v198 | 0.869  |
| Listeria_monocytogenes_FSL_R2-561_393126                 | Listeria_monocytogenes_1639_v198 | 0.9064 |
| Listeria_monocytogenes_FSL_J1-208_393119                 | Listeria_monocytogenes_1639_v198 | 0.8679 |
| Listeria_monocytogenes_FSL_J1-175_393118                 | Listeria_monocytogenes_1639_v198 | 0.8971 |
| Listeria_monocytogenes_Finland_1998_393127               | Listeria_monocytogenes_1639_v198 | 0.9179 |
| Listeria_monocytogenes_EGD-e_169963_v1                   | Listeria_monocytogenes_1639_v198 | 0.922  |
| Listeria_monocytogenes_EGD-e_169963                      | Listeria_monocytogenes_1639_v198 | 0.9217 |
| Listeria_monocytogenes_EGD_1334565                       | Listeria_monocytogenes_1639_v198 | 0.9103 |
| Listeria_monocytogenes_CFSAN002349_1299895               | Listeria_monocytogenes_1639_v198 | 0.8999 |
| Listeria_monocytogenes_ATCC_19117_882095_v1              | Listeria_monocytogenes_1639_v198 | 0.8945 |
| Listeria_monocytogenes_ATCC_19117_882095                 | Listeria_monocytogenes_1639_v198 | 0.8945 |
| Listeria_monocytogenes_6179_1288295                      | Listeria_monocytogenes_1639_v198 | 0.899  |
| Listeria_monocytogenes_1639_v9                           | Listeria_monocytogenes_1639_v198 | 0.8778 |
| Listeria_monocytogenes_1639_v99                          | Listeria_monocytogenes_1639_v198 | 0.8854 |
| Listeria_monocytogenes_1639_v98                          | Listeria_monocytogenes_1639_v198 | 0.9052 |
| Listeria_monocytogenes_1639_v97                          | Listeria_monocytogenes_1639_v198 | 0.8929 |
| Listeria_monocytogenes_1639_v96                          | Listeria_monocytogenes_1639_v198 | 0.884  |
| Listeria_monocytogenes_1639_v95                          | Listeria_monocytogenes_1639_v198 | 0.884  |
| Listeria_monocytogenes_1639_v94                          | Listeria_monocytogenes_1639_v198 | 0.884  |
| Listeria_monocytogenes_1639_v93                          | Listeria_monocytogenes_1639_v198 | 0.8988 |
| Listeria_monocytogenes_1639_v92                          | Listeria_monocytogenes_1639_v198 | 0.885  |
| Listeria_monocytogenes_1639_v91                          | Listeria_monocytogenes_1639_v198 | 0.8885 |
| Listeria_monocytogenes_1639_v90                          | Listeria_monocytogenes_1639_v198 | 0.9052 |
| Listeria_monocytogenes_1639_v8                           | Listeria_monocytogenes_1639_v198 | 0.8836 |
| Listeria_monocytogenes_1639_v89                          | Listeria_monocytogenes_1639_v198 | 0.8969 |
| Listeria_monocytogenes_1639_v88                          | Listeria_monocytogenes_1639_v198 | 0.9057 |
| Listeria_monocytogenes_1639_v87                          | Listeria_monocytogenes_1639_v198 | 0.9038 |
| Listeria_monocytogenes_1639_v86                          | Listeria_monocytogenes_1639_v198 | 0.9035 |
| Listeria_monocytogenes_1639_v85                          | Listeria_monocytogenes_1639_v198 | 0.8895 |
| Listeria_monocytogenes_1639_v84                          | Listeria_monocytogenes_1639_v198 | 0.9062 |
| Listeria_monocytogenes_1639_v83                          | Listeria_monocytogenes_1639_v198 | 0.8902 |
| Listeria_monocytogenes_1639_v82                          | Listeria_monocytogenes_1639_v198 | 0.8899 |
| Listeria_monocytogenes_1639_v81                          | Listeria_monocytogenes_1639_v198 | 0.9016 |
| Listeria_monocytogenes_1639_v80                          | Listeria_monocytogenes_1639_v198 | 0.8966 |
| Listeria_monocytogenes_1639_v7                           | Listeria_monocytogenes_1639_v198 | 0.8836 |
| Listeria_monocytogenes_1639_v79                          | Listeria_monocytogenes_1639_v198 | 0.9004 |
| Listeria_monocytogenes_1639_v78                          | Listeria_monocytogenes_1639_v198 | 0.9017 |
| Listeria_monocytogenes_1639_v77                          | Listeria_monocytogenes_1639_v198 | 0.9046 |



|                                                          |                                  |        |
|----------------------------------------------------------|----------------------------------|--------|
| Listeria_monocytogenes_1639_v76                          | Listeria_monocytogenes_1639_v198 | 0.8977 |
| Listeria_monocytogenes_1639_v75                          | Listeria_monocytogenes_1639_v198 | 0.8693 |
| Listeria_monocytogenes_1639_v74                          | Listeria_monocytogenes_1639_v198 | 0.9031 |
| Listeria_monocytogenes_1639_v73                          | Listeria_monocytogenes_1639_v198 | 0.9054 |
| Listeria_monocytogenes_1639_v72                          | Listeria_monocytogenes_1639_v198 | 0.8886 |
| Listeria_monocytogenes_1639_v71                          | Listeria_monocytogenes_1639_v198 | 0.8876 |
| Listeria_monocytogenes_1639_v70                          | Listeria_monocytogenes_1639_v198 | 0.9044 |
| Listeria_monocytogenes_1639_v6                           | Listeria_monocytogenes_1639_v198 | 0.8833 |
| Listeria_monocytogenes_1639_v69                          | Listeria_monocytogenes_1639_v198 | 0.8907 |
| Listeria_monocytogenes_1639_v68                          | Listeria_monocytogenes_1639_v198 | 0.9107 |
| Listeria_monocytogenes_1639_v67                          | Listeria_monocytogenes_1639_v198 | 0.8932 |
| Listeria_monocytogenes_1639_v66                          | Listeria_monocytogenes_1639_v198 | 0.9095 |
| Listeria_monocytogenes_1639_v65                          | Listeria_monocytogenes_1639_v198 | 0.9008 |
| Listeria_monocytogenes_1639_v64                          | Listeria_monocytogenes_1639_v198 | 0.9028 |
| Listeria_monocytogenes_1639_v63                          | Listeria_monocytogenes_1639_v198 | 0.8887 |
| Listeria_monocytogenes_1639_v62                          | Listeria_monocytogenes_1639_v198 | 0.8984 |
| Listeria_monocytogenes_1639_v61                          | Listeria_monocytogenes_1639_v198 | 0.8985 |
| Listeria_monocytogenes_1639_v60                          | Listeria_monocytogenes_1639_v198 | 0.9052 |
| Listeria_monocytogenes_1639_v5                           | Listeria_monocytogenes_1639_v198 | 0.8617 |
| Listeria_monocytogenes_1639_v59                          | Listeria_monocytogenes_1639_v198 | 0.8861 |
| Listeria_monocytogenes_1639_v58                          | Listeria_monocytogenes_1639_v198 | 0.8917 |
| Listeria_monocytogenes_1639_v57                          | Listeria_monocytogenes_1639_v198 | 0.8812 |
| Listeria_monocytogenes_1639_v56                          | Listeria_monocytogenes_1639_v198 | 0.8887 |
| Listeria_monocytogenes_1639_v55                          | Listeria_monocytogenes_1639_v198 | 0.8805 |
| Listeria_monocytogenes_1639_v54                          | Listeria_monocytogenes_1639_v198 | 0.8854 |
| Listeria_monocytogenes_1639_v53                          | Listeria_monocytogenes_1639_v198 | 0.9045 |
| Listeria_monocytogenes_1639_v52                          | Listeria_monocytogenes_1639_v198 | 0.8884 |
| Listeria_monocytogenes_1639_v51                          | Listeria_monocytogenes_1639_v198 | 0.8864 |
| Listeria_monocytogenes_1639_v50                          | Listeria_monocytogenes_1639_v198 | 0.8938 |
| Listeria_monocytogenes_1639_v4                           | Listeria_monocytogenes_1639_v198 | 0.8732 |
| Listeria_monocytogenes_1639_v49                          | Listeria_monocytogenes_1639_v198 | 0.8846 |
| Listeria_monocytogenes_1639_v48                          | Listeria_monocytogenes_1639_v198 | 0.9028 |
| Listeria_monocytogenes_1639_v47                          | Listeria_monocytogenes_1639_v198 | 0.8949 |
| Listeria_monocytogenes_1639_v46                          | Listeria_monocytogenes_1639_v198 | 0.9057 |
| Listeria_monocytogenes_1639_v45                          | Listeria_monocytogenes_1639_v198 | 0.8859 |
| Listeria_monocytogenes_1639_v44                          | Listeria_monocytogenes_1639_v198 | 0.8953 |
| Listeria_monocytogenes_1639_v43                          | Listeria_monocytogenes_1639_v198 | 0.8953 |
| Listeria_monocytogenes_1639_v42                          | Listeria_monocytogenes_1639_v198 | 0.8937 |
| Listeria_monocytogenes_1639_v41                          | Listeria_monocytogenes_1639_v198 | 0.8828 |
| Listeria_monocytogenes_1639_v40                          | Listeria_monocytogenes_1639_v198 | 0.9056 |
| Listeria_monocytogenes_1639_v3                           | Listeria_monocytogenes_1639_v198 | 0.8739 |
| Listeria_monocytogenes_1639_v39                          | Listeria_monocytogenes_1639_v198 | 0.889  |
| Listeria_monocytogenes_1639_v38                          | Listeria_monocytogenes_1639_v198 | 0.9012 |
| Listeria_monocytogenes_1639_v37                          | Listeria_monocytogenes_1639_v198 | 0.8974 |
| Listeria_monocytogenes_1639_v36                          | Listeria_monocytogenes_1639_v198 | 0.8907 |
| Listeria_monocytogenes_1639_v35                          | Listeria_monocytogenes_1639_v198 | 0.9066 |
| Listeria_monocytogenes_1639_v34                          | Listeria_monocytogenes_1639_v198 | 0.9009 |
| Listeria_monocytogenes_1639_v33                          | Listeria_monocytogenes_1639_v198 | 0.8928 |
| Listeria_monocytogenes_1639_v32                          | Listeria_monocytogenes_1639_v198 | 0.9011 |
| Listeria_monocytogenes_1639_v31                          | Listeria_monocytogenes_1639_v198 | 0.9009 |
| Listeria_monocytogenes_1639_v30                          | Listeria_monocytogenes_1639_v198 | 0.8879 |
| Listeria_monocytogenes_1639_v2                           | Listeria_monocytogenes_1639_v198 | 0.8599 |
| Listeria_monocytogenes_1639_v29                          | Listeria_monocytogenes_1639_v198 | 0.8937 |
| Listeria_monocytogenes_1639_v28                          | Listeria_monocytogenes_1639_v198 | 0.8993 |
| Listeria_monocytogenes_1639_v27                          | Listeria_monocytogenes_1639_v198 | 0.8931 |
| Listeria_monocytogenes_1639_v26                          | Listeria_monocytogenes_1639_v198 | 0.8928 |
| Listeria_monocytogenes_1639_v25                          | Listeria_monocytogenes_1639_v198 | 0.8925 |
| Listeria_monocytogenes_1639_v24                          | Listeria_monocytogenes_1639_v198 | 0.8818 |
| Listeria_monocytogenes_1639_v23                          | Listeria_monocytogenes_1639_v198 | 0.8818 |
| Listeria_monocytogenes_1639_v22                          | Listeria_monocytogenes_1639_v198 | 0.8949 |
| Listeria_monocytogenes_1639_v21                          | Listeria_monocytogenes_1639_v198 | 0.8822 |
| Listeria_monocytogenes_1639_v20                          | Listeria_monocytogenes_1639_v198 | 0.883  |
| Listeria_monocytogenes_1639_v1                           | Listeria_monocytogenes_1639_v198 | 0.8931 |
| Listeria_monocytogenes_1639_v19                          | Listeria_monocytogenes_1639_v198 | 0.8827 |
| Listeria_monocytogenes_1639_v198                         | Listeria_monocytogenes_1639_v198 | 0.1346 |
| Listeria_welshimeri_1643                                 | Listeria_monocytogenes_1639_v19  | 0.8631 |
| Listeria_welshimeri_serovar_6b_str_SLCC5334_386043       | Listeria_monocytogenes_1639_v19  | 0.8628 |
| Listeria_seeligeri_serovar_1_2b_str_SLCC3954_683837      | Listeria_monocytogenes_1639_v19  | 0.8737 |
| Listeria_seeligeri_FSL_S4-171_702452                     | Listeria_monocytogenes_1639_v19  | 0.8178 |
| Listeria_seeligeri_FSL_N1-067_702453                     | Listeria_monocytogenes_1639_v19  | 0.8387 |
| Listeria_seeligeri_1640_v1                               | Listeria_monocytogenes_1639_v19  | 0.876  |
| Listeria_seeligeri_1640                                  | Listeria_monocytogenes_1639_v19  | 0.8736 |
| Listeria_monocytogenes_WSLC1042_1457188                  | Listeria_monocytogenes_1639_v19  | 0.9319 |
| Listeria_monocytogenes_WSLC1001_1457187                  | Listeria_monocytogenes_1639_v19  | 0.9352 |
| Listeria_monocytogenes_SLCC7179_879090                   | Listeria_monocytogenes_1639_v19  | 0.9283 |
| Listeria_monocytogenes_SLCC5850_882096                   | Listeria_monocytogenes_1639_v19  | 0.9356 |
| Listeria_monocytogenes_SLCC2755_932919                   | Listeria_monocytogenes_1639_v19  | 0.9631 |
| Listeria_monocytogenes_SLCC2540_879089                   | Listeria_monocytogenes_1639_v19  | 0.9463 |
| Listeria_monocytogenes_SLCC2479_882020                   | Listeria_monocytogenes_1639_v19  | 0.9382 |
| Listeria_monocytogenes_SLCC2378_879088                   | Listeria_monocytogenes_1639_v19  | 0.933  |
| Listeria_monocytogenes_SLCC2376_882097                   | Listeria_monocytogenes_1639_v19  | 0.9163 |
| Listeria_monocytogenes_SLCC2372_932920                   | Listeria_monocytogenes_1639_v19  | 0.9452 |
| Listeria_monocytogenes_serotype_4b_str_LL195_1230340     | Listeria_monocytogenes_1639_v19  | 0.9382 |
| Listeria_monocytogenes_serotype_4b_str_LIS0087_1134669   | Listeria_monocytogenes_1639_v19  | 0.9178 |
| Listeria_monocytogenes_serotype_4b_str_F2365_265669      | Listeria_monocytogenes_1639_v19  | 0.9382 |
| Listeria_monocytogenes_serotype_4b_str_CLIP_80459_568819 | Listeria_monocytogenes_1639_v19  | 0.9404 |
| Listeria_monocytogenes_serotype_4b_str_81-0861_1196161   | Listeria_monocytogenes_1639_v19  | 0.9297 |
| Listeria_monocytogenes_serotype_4b_str_81-0592_1196160   | Listeria_monocytogenes_1639_v19  | 0.9307 |
| Listeria_monocytogenes_serotype_4b_str_81-0558_1196159   | Listeria_monocytogenes_1639_v19  | 0.9314 |
| Listeria_monocytogenes_serotype_4b_str_10-0809_1196162   | Listeria_monocytogenes_1639_v19  | 0.9311 |
| Listeria_monocytogenes_serotype_4b_str_02-6680_1196175   | Listeria_monocytogenes_1639_v19  | 0.9382 |

|                                                          |                                 |        |
|----------------------------------------------------------|---------------------------------|--------|
| Listeria_monocytogenes_serotype_4b_str_02-6679_1196174   | Listeria_monocytogenes_1639_v19 | 0.9382 |
| Listeria_monocytogenes_serotype_4b_str_02-1792_1196173   | Listeria_monocytogenes_1639_v19 | 0.9325 |
| Listeria_monocytogenes_serotype_4b_str_02-1289_1196172   | Listeria_monocytogenes_1639_v19 | 0.9325 |
| Listeria_monocytogenes_serotype_4b_str_02-1103_1196171   | Listeria_monocytogenes_1639_v19 | 0.9325 |
| Listeria_monocytogenes_serotype_3c_str_10-5027_1196195   | Listeria_monocytogenes_1639_v19 | 0.9444 |
| Listeria_monocytogenes_serotype_1_2c_str_10-5026_1196194 | Listeria_monocytogenes_1639_v19 | 0.9455 |
| Listeria_monocytogenes_serotype_1_2c_str_10-5025_1196193 | Listeria_monocytogenes_1639_v19 | 0.9455 |
| Listeria_monocytogenes_serotype_1_2b_str_10-0811_1196164 | Listeria_monocytogenes_1639_v19 | 0.9425 |
| Listeria_monocytogenes_serotype_1_2b_str_10-0810_1196163 | Listeria_monocytogenes_1639_v19 | 0.9425 |
| Listeria_monocytogenes_serotype_1_2a_str_99-6370_1196179 | Listeria_monocytogenes_1639_v19 | 0.9313 |
| Listeria_monocytogenes_serotype_1_2a_str_98-2035_1196178 | Listeria_monocytogenes_1639_v19 | 0.9313 |
| Listeria_monocytogenes_serotype_1_2a_str_95-0093_1196177 | Listeria_monocytogenes_1639_v19 | 0.9357 |
| Listeria_monocytogenes_serotype_1_2a_str_88-0478_1196176 | Listeria_monocytogenes_1639_v19 | 0.9353 |
| Listeria_monocytogenes_serotype_1_2a_str_10-5024_1196192 | Listeria_monocytogenes_1639_v19 | 0.936  |
| Listeria_monocytogenes_serotype_1_2a_str_10-4758_1196168 | Listeria_monocytogenes_1639_v19 | 0.9331 |
| Listeria_monocytogenes_serotype_1_2a_str_10-4754_1196167 | Listeria_monocytogenes_1639_v19 | 0.9335 |
| Listeria_monocytogenes_serotype_1_2a_str_10-1321_1196191 | Listeria_monocytogenes_1639_v19 | 0.936  |
| Listeria_monocytogenes_serotype_1_2a_str_10-1047_1196190 | Listeria_monocytogenes_1639_v19 | 0.9353 |
| Listeria_monocytogenes_serotype_1_2a_str_10-1046_1196189 | Listeria_monocytogenes_1639_v19 | 0.9353 |
| Listeria_monocytogenes_serotype_1_2a_str_10-0934_1196170 | Listeria_monocytogenes_1639_v19 | 0.9292 |
| Listeria_monocytogenes_serotype_1_2a_str_10-0933_1196169 | Listeria_monocytogenes_1639_v19 | 0.9292 |
| Listeria_monocytogenes_serotype_1_2a_str_10-0815_1196188 | Listeria_monocytogenes_1639_v19 | 0.932  |
| Listeria_monocytogenes_serotype_1_2a_str_10-0814_1196187 | Listeria_monocytogenes_1639_v19 | 0.9364 |
| Listeria_monocytogenes_serotype_1_2a_str_10-0813_1196166 | Listeria_monocytogenes_1639_v19 | 0.938  |
| Listeria_monocytogenes_serotype_1_2a_str_10-0812_1196165 | Listeria_monocytogenes_1639_v19 | 0.938  |
| Listeria_monocytogenes_serotype_1_2a_str_08-7669_1196186 | Listeria_monocytogenes_1639_v19 | 0.9287 |
| Listeria_monocytogenes_serotype_1_2a_str_08-7374_1196185 | Listeria_monocytogenes_1639_v19 | 0.936  |
| Listeria_monocytogenes_serotype_1_2a_str_08-6997_1196184 | Listeria_monocytogenes_1639_v19 | 0.932  |
| Listeria_monocytogenes_serotype_1_2a_str_08-6569_1196183 | Listeria_monocytogenes_1639_v19 | 0.932  |
| Listeria_monocytogenes_serotype_1_2a_str_08-6056_1196182 | Listeria_monocytogenes_1639_v19 | 0.932  |
| Listeria_monocytogenes_serotype_1_2a_str_04-5457_1196181 | Listeria_monocytogenes_1639_v19 | 0.936  |
| Listeria_monocytogenes_serotype_1_2a_str_02-5993_1196180 | Listeria_monocytogenes_1639_v19 | 0.936  |
| Listeria_monocytogenes_R479a_1437838                     | Listeria_monocytogenes_1639_v19 | 0.9434 |
| Listeria_monocytogenes_N53-1_1234142                     | Listeria_monocytogenes_1639_v19 | 0.8808 |
| Listeria_monocytogenes_M7_1030009                        | Listeria_monocytogenes_1639_v19 | 0.8996 |
| Listeria_monocytogenes_LO28_393132                       | Listeria_monocytogenes_1639_v19 | 0.9335 |
| Listeria_monocytogenes_L99_563174                        | Listeria_monocytogenes_1639_v19 | 0.9    |
| Listeria_monocytogenes_L312_882094                       | Listeria_monocytogenes_1639_v19 | 0.9407 |
| Listeria_monocytogenes_J1816_930781                      | Listeria_monocytogenes_1639_v19 | 0.9325 |
| Listeria_monocytogenes_J1-220_930782                     | Listeria_monocytogenes_1639_v19 | 0.9298 |
| Listeria_monocytogenes_J0161_393130                      | Listeria_monocytogenes_1639_v19 | 0.9375 |
| Listeria_monocytogenes_HCC23_552536                      | Listeria_monocytogenes_1639_v19 | 0.8993 |
| Listeria_monocytogenes_FSL_R2-561_393126                 | Listeria_monocytogenes_1639_v19 | 0.9397 |
| Listeria_monocytogenes_FSL_J1-208_393119                 | Listeria_monocytogenes_1639_v19 | 0.8917 |
| Listeria_monocytogenes_FSL_J1-175_393118                 | Listeria_monocytogenes_1639_v19 | 0.9528 |
| Listeria_monocytogenes_Finland_1998_393127               | Listeria_monocytogenes_1639_v19 | 0.9326 |
| Listeria_monocytogenes_EGD-e_169963_v1                   | Listeria_monocytogenes_1639_v19 | 0.928  |
| Listeria_monocytogenes_EGD-e_169963                      | Listeria_monocytogenes_1639_v19 | 0.9284 |
| Listeria_monocytogenes_EGD_1334565                       | Listeria_monocytogenes_1639_v19 | 0.9364 |
| Listeria_monocytogenes_CFSAN002349_1299895               | Listeria_monocytogenes_1639_v19 | 0.9398 |
| Listeria_monocytogenes_ATCC_19117_882095_v1              | Listeria_monocytogenes_1639_v19 | 0.9317 |
| Listeria_monocytogenes_ATCC_19117_882095                 | Listeria_monocytogenes_1639_v19 | 0.9313 |
| Listeria_monocytogenes_6179_1288295                      | Listeria_monocytogenes_1639_v19 | 0.9391 |
| Listeria_monocytogenes_1639_v9                           | Listeria_monocytogenes_1639_v19 | 0.9458 |
| Listeria_monocytogenes_1639_v99                          | Listeria_monocytogenes_1639_v19 | 0.9406 |
| Listeria_monocytogenes_1639_v98                          | Listeria_monocytogenes_1639_v19 | 0.9298 |
| Listeria_monocytogenes_1639_v97                          | Listeria_monocytogenes_1639_v19 | 0.9404 |
| Listeria_monocytogenes_1639_v96                          | Listeria_monocytogenes_1639_v19 | 0.9413 |
| Listeria_monocytogenes_1639_v95                          | Listeria_monocytogenes_1639_v19 | 0.9413 |
| Listeria_monocytogenes_1639_v94                          | Listeria_monocytogenes_1639_v19 | 0.942  |
| Listeria_monocytogenes_1639_v93                          | Listeria_monocytogenes_1639_v19 | 0.9331 |
| Listeria_monocytogenes_1639_v92                          | Listeria_monocytogenes_1639_v19 | 0.9417 |
| Listeria_monocytogenes_1639_v91                          | Listeria_monocytogenes_1639_v19 | 0.9368 |
| Listeria_monocytogenes_1639_v90                          | Listeria_monocytogenes_1639_v19 | 0.9298 |
| Listeria_monocytogenes_1639_v8                           | Listeria_monocytogenes_1639_v19 | 0.9307 |
| Listeria_monocytogenes_1639_v89                          | Listeria_monocytogenes_1639_v19 | 0.9368 |
| Listeria_monocytogenes_1639_v88                          | Listeria_monocytogenes_1639_v19 | 0.9355 |
| Listeria_monocytogenes_1639_v87                          | Listeria_monocytogenes_1639_v19 | 0.9342 |
| Listeria_monocytogenes_1639_v86                          | Listeria_monocytogenes_1639_v19 | 0.9339 |
| Listeria_monocytogenes_1639_v85                          | Listeria_monocytogenes_1639_v19 | 0.929  |
| Listeria_monocytogenes_1639_v84                          | Listeria_monocytogenes_1639_v19 | 0.9397 |
| Listeria_monocytogenes_1639_v83                          | Listeria_monocytogenes_1639_v19 | 0.9284 |
| Listeria_monocytogenes_1639_v82                          | Listeria_monocytogenes_1639_v19 | 0.9281 |
| Listeria_monocytogenes_1639_v81                          | Listeria_monocytogenes_1639_v19 | 0.9439 |
| Listeria_monocytogenes_1639_v80                          | Listeria_monocytogenes_1639_v19 | 0.9453 |
| Listeria_monocytogenes_1639_v7                           | Listeria_monocytogenes_1639_v19 | 0.9307 |
| Listeria_monocytogenes_1639_v79                          | Listeria_monocytogenes_1639_v19 | 0.9415 |
| Listeria_monocytogenes_1639_v78                          | Listeria_monocytogenes_1639_v19 | 0.9447 |
| Listeria_monocytogenes_1639_v77                          | Listeria_monocytogenes_1639_v19 | 0.9278 |
| Listeria_monocytogenes_1639_v76                          | Listeria_monocytogenes_1639_v19 | 0.9327 |
| Listeria_monocytogenes_1639_v75                          | Listeria_monocytogenes_1639_v19 | 0.9    |
| Listeria_monocytogenes_1639_v74                          | Listeria_monocytogenes_1639_v19 | 0.9214 |
| Listeria_monocytogenes_1639_v73                          | Listeria_monocytogenes_1639_v19 | 0.9386 |
| Listeria_monocytogenes_1639_v72                          | Listeria_monocytogenes_1639_v19 | 0.9257 |
| Listeria_monocytogenes_1639_v71                          | Listeria_monocytogenes_1639_v19 | 0.9307 |
| Listeria_monocytogenes_1639_v70                          | Listeria_monocytogenes_1639_v19 | 0.9428 |
| Listeria_monocytogenes_1639_v6                           | Listeria_monocytogenes_1639_v19 | 0.9303 |
| Listeria_monocytogenes_1639_v69                          | Listeria_monocytogenes_1639_v19 | 0.9307 |
| Listeria_monocytogenes_1639_v68                          | Listeria_monocytogenes_1639_v19 | 0.931  |
| Listeria_monocytogenes_1639_v67                          | Listeria_monocytogenes_1639_v19 | 0.9561 |
| Listeria_monocytogenes_1639_v66                          | Listeria_monocytogenes_1639_v19 | 0.9362 |

|                                                          |                                 |        |
|----------------------------------------------------------|---------------------------------|--------|
| Listeria_monocytogenes_1639_v65                          | Listeria_monocytogenes_1639_v19 | 0.9315 |
| Listeria_monocytogenes_1639_v64                          | Listeria_monocytogenes_1639_v19 | 0.9297 |
| Listeria_monocytogenes_1639_v63                          | Listeria_monocytogenes_1639_v19 | 0.956  |
| Listeria_monocytogenes_1639_v62                          | Listeria_monocytogenes_1639_v19 | 0.9409 |
| Listeria_monocytogenes_1639_v61                          | Listeria_monocytogenes_1639_v19 | 0.9358 |
| Listeria_monocytogenes_1639_v60                          | Listeria_monocytogenes_1639_v19 | 0.9395 |
| Listeria_monocytogenes_1639_v5                           | Listeria_monocytogenes_1639_v19 | 0.9132 |
| Listeria_monocytogenes_1639_v59                          | Listeria_monocytogenes_1639_v19 | 0.9313 |
| Listeria_monocytogenes_1639_v58                          | Listeria_monocytogenes_1639_v19 | 0.9291 |
| Listeria_monocytogenes_1639_v57                          | Listeria_monocytogenes_1639_v19 | 0.928  |
| Listeria_monocytogenes_1639_v56                          | Listeria_monocytogenes_1639_v19 | 0.9343 |
| Listeria_monocytogenes_1639_v55                          | Listeria_monocytogenes_1639_v19 | 0.9367 |
| Listeria_monocytogenes_1639_v54                          | Listeria_monocytogenes_1639_v19 | 0.916  |
| Listeria_monocytogenes_1639_v53                          | Listeria_monocytogenes_1639_v19 | 0.9188 |
| Listeria_monocytogenes_1639_v52                          | Listeria_monocytogenes_1639_v19 | 0.9334 |
| Listeria_monocytogenes_1639_v51                          | Listeria_monocytogenes_1639_v19 | 0.9306 |
| Listeria_monocytogenes_1639_v50                          | Listeria_monocytogenes_1639_v19 | 0.9349 |
| Listeria_monocytogenes_1639_v4                           | Listeria_monocytogenes_1639_v19 | 0.9262 |
| Listeria_monocytogenes_1639_v49                          | Listeria_monocytogenes_1639_v19 | 0.9271 |
| Listeria_monocytogenes_1639_v48                          | Listeria_monocytogenes_1639_v19 | 0.9396 |
| Listeria_monocytogenes_1639_v47                          | Listeria_monocytogenes_1639_v19 | 0.9342 |
| Listeria_monocytogenes_1639_v46                          | Listeria_monocytogenes_1639_v19 | 0.9347 |
| Listeria_monocytogenes_1639_v45                          | Listeria_monocytogenes_1639_v19 | 0.9349 |
| Listeria_monocytogenes_1639_v44                          | Listeria_monocytogenes_1639_v19 | 0.936  |
| Listeria_monocytogenes_1639_v43                          | Listeria_monocytogenes_1639_v19 | 0.936  |
| Listeria_monocytogenes_1639_v42                          | Listeria_monocytogenes_1639_v19 | 0.9189 |
| Listeria_monocytogenes_1639_v41                          | Listeria_monocytogenes_1639_v19 | 0.9195 |
| Listeria_monocytogenes_1639_v40                          | Listeria_monocytogenes_1639_v19 | 0.935  |
| Listeria_monocytogenes_1639_v3                           | Listeria_monocytogenes_1639_v19 | 0.9269 |
| Listeria_monocytogenes_1639_v39                          | Listeria_monocytogenes_1639_v19 | 0.9574 |
| Listeria_monocytogenes_1639_v38                          | Listeria_monocytogenes_1639_v19 | 0.9238 |
| Listeria_monocytogenes_1639_v37                          | Listeria_monocytogenes_1639_v19 | 0.9176 |
| Listeria_monocytogenes_1639_v36                          | Listeria_monocytogenes_1639_v19 | 0.937  |
| Listeria_monocytogenes_1639_v35                          | Listeria_monocytogenes_1639_v19 | 0.9294 |
| Listeria_monocytogenes_1639_v34                          | Listeria_monocytogenes_1639_v19 | 0.9426 |
| Listeria_monocytogenes_1639_v33                          | Listeria_monocytogenes_1639_v19 | 0.9425 |
| Listeria_monocytogenes_1639_v32                          | Listeria_monocytogenes_1639_v19 | 0.9268 |
| Listeria_monocytogenes_1639_v31                          | Listeria_monocytogenes_1639_v19 | 0.9429 |
| Listeria_monocytogenes_1639_v30                          | Listeria_monocytogenes_1639_v19 | 0.9295 |
| Listeria_monocytogenes_1639_v2                           | Listeria_monocytogenes_1639_v19 | 0.9407 |
| Listeria_monocytogenes_1639_v29                          | Listeria_monocytogenes_1639_v19 | 0.9377 |
| Listeria_monocytogenes_1639_v28                          | Listeria_monocytogenes_1639_v19 | 0.9319 |
| Listeria_monocytogenes_1639_v27                          | Listeria_monocytogenes_1639_v19 | 0.9304 |
| Listeria_monocytogenes_1639_v26                          | Listeria_monocytogenes_1639_v19 | 0.9312 |
| Listeria_monocytogenes_1639_v25                          | Listeria_monocytogenes_1639_v19 | 0.9312 |
| Listeria_monocytogenes_1639_v24                          | Listeria_monocytogenes_1639_v19 | 0.9279 |
| Listeria_monocytogenes_1639_v23                          | Listeria_monocytogenes_1639_v19 | 0.9276 |
| Listeria_monocytogenes_1639_v22                          | Listeria_monocytogenes_1639_v19 | 0.9501 |
| Listeria_monocytogenes_1639_v21                          | Listeria_monocytogenes_1639_v19 | 0.9294 |
| Listeria_monocytogenes_1639_v20                          | Listeria_monocytogenes_1639_v19 | 0.9993 |
| Listeria_monocytogenes_1639_v1                           | Listeria_monocytogenes_1639_v19 | 0.9342 |
| Listeria_monocytogenes_1639_v19                          | Listeria_monocytogenes_1639_v19 | 0.0805 |
| Listeria_welshimeri_1643                                 | Listeria_monocytogenes_1639_v1  | 0.8527 |
| Listeria_welshimeri_serovar_6b_str_SLCC5334_386043       | Listeria_monocytogenes_1639_v1  | 0.8524 |
| Listeria_seeligeri_serovar_1_2b_str_SLCC3954_683837      | Listeria_monocytogenes_1639_v1  | 0.8586 |
| Listeria_seeligeri_FSL_S4-171_702452                     | Listeria_monocytogenes_1639_v1  | 0.8013 |
| Listeria_seeligeri_FSL_N1-067_702453                     | Listeria_monocytogenes_1639_v1  | 0.829  |
| Listeria_seeligeri_1640_v1                               | Listeria_monocytogenes_1639_v1  | 0.8577 |
| Listeria_seeligeri_1640                                  | Listeria_monocytogenes_1639_v1  | 0.8636 |
| Listeria_monocytogenes_WSLC1042_1457188                  | Listeria_monocytogenes_1639_v1  | 0.9017 |
| Listeria_monocytogenes_WSLC1001_1457187                  | Listeria_monocytogenes_1639_v1  | 0.9364 |
| Listeria_monocytogenes_SLCC7179_879090                   | Listeria_monocytogenes_1639_v1  | 0.9366 |
| Listeria_monocytogenes_SLCC5850_882096                   | Listeria_monocytogenes_1639_v1  | 0.9372 |
| Listeria_monocytogenes_SLCC2755_932919                   | Listeria_monocytogenes_1639_v1  | 0.913  |
| Listeria_monocytogenes_SLCC2540_879089                   | Listeria_monocytogenes_1639_v1  | 0.9221 |
| Listeria_monocytogenes_SLCC2479_882020                   | Listeria_monocytogenes_1639_v1  | 0.939  |
| Listeria_monocytogenes_SLCC2378_879088                   | Listeria_monocytogenes_1639_v1  | 0.9026 |
| Listeria_monocytogenes_SLCC2376_882097                   | Listeria_monocytogenes_1639_v1  | 0.908  |
| Listeria_monocytogenes_SLCC2372_932920                   | Listeria_monocytogenes_1639_v1  | 0.9409 |
| Listeria_monocytogenes_serotype_4b_str_LL195_1230340     | Listeria_monocytogenes_1639_v1  | 0.9079 |
| Listeria_monocytogenes_serotype_4b_str_LIS0087_1134669   | Listeria_monocytogenes_1639_v1  | 0.9259 |
| Listeria_monocytogenes_serotype_4b_str_F2365_265669      | Listeria_monocytogenes_1639_v1  | 0.9079 |
| Listeria_monocytogenes_serotype_4b_str_CLIP_80459_568819 | Listeria_monocytogenes_1639_v1  | 0.909  |
| Listeria_monocytogenes_serotype_4b_str_81-0861_1196161   | Listeria_monocytogenes_1639_v1  | 0.9077 |
| Listeria_monocytogenes_serotype_4b_str_81-0592_1196160   | Listeria_monocytogenes_1639_v1  | 0.9087 |
| Listeria_monocytogenes_serotype_4b_str_81-0558_1196159   | Listeria_monocytogenes_1639_v1  | 0.9083 |
| Listeria_monocytogenes_serotype_4b_str_10-0809_1196162   | Listeria_monocytogenes_1639_v1  | 0.9087 |
| Listeria_monocytogenes_serotype_4b_str_02-6680_1196175   | Listeria_monocytogenes_1639_v1  | 0.9076 |
| Listeria_monocytogenes_serotype_4b_str_02-6679_1196174   | Listeria_monocytogenes_1639_v1  | 0.9076 |
| Listeria_monocytogenes_serotype_4b_str_02-1792_1196173   | Listeria_monocytogenes_1639_v1  | 0.908  |
| Listeria_monocytogenes_serotype_4b_str_02-1289_1196172   | Listeria_monocytogenes_1639_v1  | 0.908  |
| Listeria_monocytogenes_serotype_4b_str_02-1103_1196171   | Listeria_monocytogenes_1639_v1  | 0.908  |
| Listeria_monocytogenes_serotype_3c_str_10-5027_1196195   | Listeria_monocytogenes_1639_v1  | 0.9437 |
| Listeria_monocytogenes_serotype_1_2c_str_10-5026_1196194 | Listeria_monocytogenes_1639_v1  | 0.9434 |
| Listeria_monocytogenes_serotype_1_2c_str_10-5025_1196193 | Listeria_monocytogenes_1639_v1  | 0.9434 |
| Listeria_monocytogenes_serotype_1_2b_str_10-0811_1196164 | Listeria_monocytogenes_1639_v1  | 0.9338 |
| Listeria_monocytogenes_serotype_1_2b_str_10-0810_1196163 | Listeria_monocytogenes_1639_v1  | 0.9338 |
| Listeria_monocytogenes_serotype_1_2a_str_99-6370_1196179 | Listeria_monocytogenes_1639_v1  | 0.9405 |
| Listeria_monocytogenes_serotype_1_2a_str_98-2035_1196178 | Listeria_monocytogenes_1639_v1  | 0.9405 |
| Listeria_monocytogenes_serotype_1_2a_str_95-0093_1196177 | Listeria_monocytogenes_1639_v1  | 0.9369 |
| Listeria_monocytogenes_serotype_1_2a_str_88-0478_1196176 | Listeria_monocytogenes_1639_v1  | 0.9365 |

|                                                          |                                |        |
|----------------------------------------------------------|--------------------------------|--------|
| Listeria_monocytogenes_serotype_1_2a_str_10-5024_1196192 | Listeria_monocytogenes_1639_v1 | 0.9372 |
| Listeria_monocytogenes_serotype_1_2a_str_10-4758_1196168 | Listeria_monocytogenes_1639_v1 | 0.9388 |
| Listeria_monocytogenes_serotype_1_2a_str_10-4754_1196167 | Listeria_monocytogenes_1639_v1 | 0.9391 |
| Listeria_monocytogenes_serotype_1_2a_str_10-1321_1196191 | Listeria_monocytogenes_1639_v1 | 0.9372 |
| Listeria_monocytogenes_serotype_1_2a_str_10-1047_1196190 | Listeria_monocytogenes_1639_v1 | 0.9368 |
| Listeria_monocytogenes_serotype_1_2a_str_10-1046_1196189 | Listeria_monocytogenes_1639_v1 | 0.9368 |
| Listeria_monocytogenes_serotype_1_2a_str_10-0934_1196170 | Listeria_monocytogenes_1639_v1 | 0.9339 |
| Listeria_monocytogenes_serotype_1_2a_str_10-0933_1196169 | Listeria_monocytogenes_1639_v1 | 0.9339 |
| Listeria_monocytogenes_serotype_1_2a_str_10-0815_1196188 | Listeria_monocytogenes_1639_v1 | 0.9408 |
| Listeria_monocytogenes_serotype_1_2a_str_10-0814_1196187 | Listeria_monocytogenes_1639_v1 | 0.9372 |
| Listeria_monocytogenes_serotype_1_2a_str_10-0813_1196166 | Listeria_monocytogenes_1639_v1 | 0.945  |
| Listeria_monocytogenes_serotype_1_2a_str_10-0812_1196165 | Listeria_monocytogenes_1639_v1 | 0.945  |
| Listeria_monocytogenes_serotype_1_2a_str_08-7669_1196186 | Listeria_monocytogenes_1639_v1 | 0.9322 |
| Listeria_monocytogenes_serotype_1_2a_str_08-7374_1196185 | Listeria_monocytogenes_1639_v1 | 0.9372 |
| Listeria_monocytogenes_serotype_1_2a_str_08-6997_1196184 | Listeria_monocytogenes_1639_v1 | 0.9408 |
| Listeria_monocytogenes_serotype_1_2a_str_08-6569_1196183 | Listeria_monocytogenes_1639_v1 | 0.9408 |
| Listeria_monocytogenes_serotype_1_2a_str_08-6056_1196182 | Listeria_monocytogenes_1639_v1 | 0.9408 |
| Listeria_monocytogenes_serotype_1_2a_str_04-5457_1196181 | Listeria_monocytogenes_1639_v1 | 0.9372 |
| Listeria_monocytogenes_serotype_1_2a_str_02-5993_1196180 | Listeria_monocytogenes_1639_v1 | 0.9372 |
| Listeria_monocytogenes_R479a_1437838                     | Listeria_monocytogenes_1639_v1 | 0.9466 |
| Listeria_monocytogenes_N53-1_1234142                     | Listeria_monocytogenes_1639_v1 | 0.893  |
| Listeria_monocytogenes_M7_1030009                        | Listeria_monocytogenes_1639_v1 | 0.9017 |
| Listeria_monocytogenes_LO28_393132                       | Listeria_monocytogenes_1639_v1 | 0.9413 |
| Listeria_monocytogenes_L99_563174                        | Listeria_monocytogenes_1639_v1 | 0.902  |
| Listeria_monocytogenes_L312_882094                       | Listeria_monocytogenes_1639_v1 | 0.909  |
| Listeria_monocytogenes_J1816_930781                      | Listeria_monocytogenes_1639_v1 | 0.9065 |
| Listeria_monocytogenes_J1-220_930782                     | Listeria_monocytogenes_1639_v1 | 0.9123 |
| Listeria_monocytogenes_J0161_393130                      | Listeria_monocytogenes_1639_v1 | 0.9471 |
| Listeria_monocytogenes_HCC23_552536                      | Listeria_monocytogenes_1639_v1 | 0.9013 |
| Listeria_monocytogenes_FSL_R2-561_393126                 | Listeria_monocytogenes_1639_v1 | 0.9405 |
| Listeria_monocytogenes_FSL_J1-208_393119                 | Listeria_monocytogenes_1639_v1 | 0.8802 |
| Listeria_monocytogenes_FSL_J1-175_393118                 | Listeria_monocytogenes_1639_v1 | 0.9247 |
| Listeria_monocytogenes_Finland_1998_393127               | Listeria_monocytogenes_1639_v1 | 0.9316 |
| Listeria_monocytogenes_EGD-e_169963_v1                   | Listeria_monocytogenes_1639_v1 | 0.937  |
| Listeria_monocytogenes_EGD-e_169963                      | Listeria_monocytogenes_1639_v1 | 0.937  |
| Listeria_monocytogenes_EGD_1334565                       | Listeria_monocytogenes_1639_v1 | 0.9379 |
| Listeria_monocytogenes_CFSAN002349_1299895               | Listeria_monocytogenes_1639_v1 | 0.91   |
| Listeria_monocytogenes_ATCC_19117_882095_v1              | Listeria_monocytogenes_1639_v1 | 0.9064 |
| Listeria_monocytogenes_ATCC_19117_882095                 | Listeria_monocytogenes_1639_v1 | 0.906  |
| Listeria_monocytogenes_6179_1288295                      | Listeria_monocytogenes_1639_v1 | 0.9864 |
| Listeria_monocytogenes_1639_v9                           | Listeria_monocytogenes_1639_v1 | 0.9229 |
| Listeria_monocytogenes_1639_v99                          | Listeria_monocytogenes_1639_v1 | 0.9138 |
| Listeria_monocytogenes_1639_v98                          | Listeria_monocytogenes_1639_v1 | 0.9448 |
| Listeria_monocytogenes_1639_v97                          | Listeria_monocytogenes_1639_v1 | 0.9157 |
| Listeria_monocytogenes_1639_v96                          | Listeria_monocytogenes_1639_v1 | 0.9121 |
| Listeria_monocytogenes_1639_v95                          | Listeria_monocytogenes_1639_v1 | 0.9121 |
| Listeria_monocytogenes_1639_v94                          | Listeria_monocytogenes_1639_v1 | 0.9124 |
| Listeria_monocytogenes_1639_v93                          | Listeria_monocytogenes_1639_v1 | 0.9491 |
| Listeria_monocytogenes_1639_v92                          | Listeria_monocytogenes_1639_v1 | 0.9146 |
| Listeria_monocytogenes_1639_v91                          | Listeria_monocytogenes_1639_v1 | 0.914  |
| Listeria_monocytogenes_1639_v90                          | Listeria_monocytogenes_1639_v1 | 0.9448 |
| Listeria_monocytogenes_1639_v8                           | Listeria_monocytogenes_1639_v1 | 0.9405 |
| Listeria_monocytogenes_1639_v89                          | Listeria_monocytogenes_1639_v1 | 0.9168 |
| Listeria_monocytogenes_1639_v88                          | Listeria_monocytogenes_1639_v1 | 0.9407 |
| Listeria_monocytogenes_1639_v87                          | Listeria_monocytogenes_1639_v1 | 0.9442 |
| Listeria_monocytogenes_1639_v86                          | Listeria_monocytogenes_1639_v1 | 0.9438 |
| Listeria_monocytogenes_1639_v85                          | Listeria_monocytogenes_1639_v1 | 0.9074 |
| Listeria_monocytogenes_1639_v84                          | Listeria_monocytogenes_1639_v1 | 0.9427 |
| Listeria_monocytogenes_1639_v83                          | Listeria_monocytogenes_1639_v1 | 0.9097 |
| Listeria_monocytogenes_1639_v82                          | Listeria_monocytogenes_1639_v1 | 0.909  |
| Listeria_monocytogenes_1639_v81                          | Listeria_monocytogenes_1639_v1 | 0.9443 |
| Listeria_monocytogenes_1639_v80                          | Listeria_monocytogenes_1639_v1 | 0.9278 |
| Listeria_monocytogenes_1639_v7                           | Listeria_monocytogenes_1639_v1 | 0.9405 |
| Listeria_monocytogenes_1639_v79                          | Listeria_monocytogenes_1639_v1 | 0.9426 |
| Listeria_monocytogenes_1639_v78                          | Listeria_monocytogenes_1639_v1 | 0.9447 |
| Listeria_monocytogenes_1639_v77                          | Listeria_monocytogenes_1639_v1 | 0.9332 |
| Listeria_monocytogenes_1639_v76                          | Listeria_monocytogenes_1639_v1 | 0.9444 |
| Listeria_monocytogenes_1639_v75                          | Listeria_monocytogenes_1639_v1 | 0.902  |
| Listeria_monocytogenes_1639_v74                          | Listeria_monocytogenes_1639_v1 | 0.9315 |
| Listeria_monocytogenes_1639_v73                          | Listeria_monocytogenes_1639_v1 | 0.9437 |
| Listeria_monocytogenes_1639_v72                          | Listeria_monocytogenes_1639_v1 | 0.9092 |
| Listeria_monocytogenes_1639_v71                          | Listeria_monocytogenes_1639_v1 | 0.9395 |
| Listeria_monocytogenes_1639_v70                          | Listeria_monocytogenes_1639_v1 | 0.941  |
| Listeria_monocytogenes_1639_v6                           | Listeria_monocytogenes_1639_v1 | 0.9401 |
| Listeria_monocytogenes_1639_v69                          | Listeria_monocytogenes_1639_v1 | 0.9087 |
| Listeria_monocytogenes_1639_v68                          | Listeria_monocytogenes_1639_v1 | 0.9388 |
| Listeria_monocytogenes_1639_v67                          | Listeria_monocytogenes_1639_v1 | 0.9286 |
| Listeria_monocytogenes_1639_v66                          | Listeria_monocytogenes_1639_v1 | 0.9403 |
| Listeria_monocytogenes_1639_v65                          | Listeria_monocytogenes_1639_v1 | 0.9475 |
| Listeria_monocytogenes_1639_v64                          | Listeria_monocytogenes_1639_v1 | 0.9433 |
| Listeria_monocytogenes_1639_v63                          | Listeria_monocytogenes_1639_v1 | 0.9276 |
| Listeria_monocytogenes_1639_v62                          | Listeria_monocytogenes_1639_v1 | 0.9496 |
| Listeria_monocytogenes_1639_v61                          | Listeria_monocytogenes_1639_v1 | 0.9385 |
| Listeria_monocytogenes_1639_v60                          | Listeria_monocytogenes_1639_v1 | 0.9443 |
| Listeria_monocytogenes_1639_v5                           | Listeria_monocytogenes_1639_v1 | 0.9048 |
| Listeria_monocytogenes_1639_v59                          | Listeria_monocytogenes_1639_v1 | 0.9067 |
| Listeria_monocytogenes_1639_v58                          | Listeria_monocytogenes_1639_v1 | 0.9089 |
| Listeria_monocytogenes_1639_v57                          | Listeria_monocytogenes_1639_v1 | 0.9066 |
| Listeria_monocytogenes_1639_v56                          | Listeria_monocytogenes_1639_v1 | 0.9122 |
| Listeria_monocytogenes_1639_v55                          | Listeria_monocytogenes_1639_v1 | 0.9142 |
| Listeria_monocytogenes_1639_v54                          | Listeria_monocytogenes_1639_v1 | 0.9028 |

|                                                          |                                 |        |
|----------------------------------------------------------|---------------------------------|--------|
| Listeria_monocytogenes_1639_v53                          | Listeria_monocytogenes_1639_v1  | 0.9231 |
| Listeria_monocytogenes_1639_v52                          | Listeria_monocytogenes_1639_v1  | 0.9161 |
| Listeria_monocytogenes_1639_v51                          | Listeria_monocytogenes_1639_v1  | 0.9112 |
| Listeria_monocytogenes_1639_v50                          | Listeria_monocytogenes_1639_v1  | 0.9358 |
| Listeria_monocytogenes_1639_v4                           | Listeria_monocytogenes_1639_v1  | 0.9127 |
| Listeria_monocytogenes_1639_v49                          | Listeria_monocytogenes_1639_v1  | 0.8971 |
| Listeria_monocytogenes_1639_v48                          | Listeria_monocytogenes_1639_v1  | 0.948  |
| Listeria_monocytogenes_1639_v47                          | Listeria_monocytogenes_1639_v1  | 0.9358 |
| Listeria_monocytogenes_1639_v46                          | Listeria_monocytogenes_1639_v1  | 0.9374 |
| Listeria_monocytogenes_1639_v45                          | Listeria_monocytogenes_1639_v1  | 0.9407 |
| Listeria_monocytogenes_1639_v44                          | Listeria_monocytogenes_1639_v1  | 0.9372 |
| Listeria_monocytogenes_1639_v43                          | Listeria_monocytogenes_1639_v1  | 0.9372 |
| Listeria_monocytogenes_1639_v42                          | Listeria_monocytogenes_1639_v1  | 0.9347 |
| Listeria_monocytogenes_1639_v41                          | Listeria_monocytogenes_1639_v1  | 0.933  |
| Listeria_monocytogenes_1639_v40                          | Listeria_monocytogenes_1639_v1  | 0.942  |
| Listeria_monocytogenes_1639_v3                           | Listeria_monocytogenes_1639_v1  | 0.9134 |
| Listeria_monocytogenes_1639_v39                          | Listeria_monocytogenes_1639_v1  | 0.929  |
| Listeria_monocytogenes_1639_v38                          | Listeria_monocytogenes_1639_v1  | 0.923  |
| Listeria_monocytogenes_1639_v37                          | Listeria_monocytogenes_1639_v1  | 0.9198 |
| Listeria_monocytogenes_1639_v36                          | Listeria_monocytogenes_1639_v1  | 0.9379 |
| Listeria_monocytogenes_1639_v35                          | Listeria_monocytogenes_1639_v1  | 0.939  |
| Listeria_monocytogenes_1639_v34                          | Listeria_monocytogenes_1639_v1  | 0.944  |
| Listeria_monocytogenes_1639_v33                          | Listeria_monocytogenes_1639_v1  | 0.9338 |
| Listeria_monocytogenes_1639_v32                          | Listeria_monocytogenes_1639_v1  | 0.9332 |
| Listeria_monocytogenes_1639_v31                          | Listeria_monocytogenes_1639_v1  | 0.9444 |
| Listeria_monocytogenes_1639_v30                          | Listeria_monocytogenes_1639_v1  | 0.9138 |
| Listeria_monocytogenes_1639_v2                           | Listeria_monocytogenes_1639_v1  | 0.9062 |
| Listeria_monocytogenes_1639_v29                          | Listeria_monocytogenes_1639_v1  | 0.9356 |
| Listeria_monocytogenes_1639_v28                          | Listeria_monocytogenes_1639_v1  | 0.936  |
| Listeria_monocytogenes_1639_v27                          | Listeria_monocytogenes_1639_v1  | 0.9349 |
| Listeria_monocytogenes_1639_v26                          | Listeria_monocytogenes_1639_v1  | 0.9346 |
| Listeria_monocytogenes_1639_v25                          | Listeria_monocytogenes_1639_v1  | 0.9346 |
| Listeria_monocytogenes_1639_v24                          | Listeria_monocytogenes_1639_v1  | 0.9108 |
| Listeria_monocytogenes_1639_v23                          | Listeria_monocytogenes_1639_v1  | 0.9101 |
| Listeria_monocytogenes_1639_v22                          | Listeria_monocytogenes_1639_v1  | 0.9341 |
| Listeria_monocytogenes_1639_v21                          | Listeria_monocytogenes_1639_v1  | 0.9119 |
| Listeria_monocytogenes_1639_v20                          | Listeria_monocytogenes_1639_v1  | 0.9349 |
| Listeria_monocytogenes_1639_v1                           | Listeria_monocytogenes_1639_v1  | 0.0724 |
| Listeria_welshimeri_1643                                 | Listeria_monocytogenes_1639_v20 | 0.8634 |
| Listeria_welshimeri_serovar_6b_str_SLCC5334_386043       | Listeria_monocytogenes_1639_v20 | 0.8631 |
| Listeria_seeligeri_serovar_1_2b_str_SLCC3954_683837      | Listeria_monocytogenes_1639_v20 | 0.8741 |
| Listeria_seeligeri_FSL_S4-171_702452                     | Listeria_monocytogenes_1639_v20 | 0.8181 |
| Listeria_seeligeri_FSL_N1-067_702453                     | Listeria_monocytogenes_1639_v20 | 0.839  |
| Listeria_seeligeri_1640_v1                               | Listeria_monocytogenes_1639_v20 | 0.8764 |
| Listeria_seeligeri_1640                                  | Listeria_monocytogenes_1639_v20 | 0.8739 |
| Listeria_monocytogenes_WSLC1042_1457188                  | Listeria_monocytogenes_1639_v20 | 0.9323 |
| Listeria_monocytogenes_WSLC1001_1457187                  | Listeria_monocytogenes_1639_v20 | 0.9355 |
| Listeria_monocytogenes_SLCC7179_879090                   | Listeria_monocytogenes_1639_v20 | 0.9286 |
| Listeria_monocytogenes_SLCC5850_882096                   | Listeria_monocytogenes_1639_v20 | 0.936  |
| Listeria_monocytogenes_SLCC2755_932919                   | Listeria_monocytogenes_1639_v20 | 0.9638 |
| Listeria_monocytogenes_SLCC2540_879089                   | Listeria_monocytogenes_1639_v20 | 0.9466 |
| Listeria_monocytogenes_SLCC2479_882020                   | Listeria_monocytogenes_1639_v20 | 0.9385 |
| Listeria_monocytogenes_SLCC2378_879088                   | Listeria_monocytogenes_1639_v20 | 0.9333 |
| Listeria_monocytogenes_SLCC2376_882097                   | Listeria_monocytogenes_1639_v20 | 0.9166 |
| Listeria_monocytogenes_SLCC2372_932920                   | Listeria_monocytogenes_1639_v20 | 0.9459 |
| Listeria_monocytogenes_serotype_4b_str_LL195_1230340     | Listeria_monocytogenes_1639_v20 | 0.9385 |
| Listeria_monocytogenes_serotype_4b_str_LIS0087_1134669   | Listeria_monocytogenes_1639_v20 | 0.9181 |
| Listeria_monocytogenes_serotype_4b_str_F2365_265669      | Listeria_monocytogenes_1639_v20 | 0.9385 |
| Listeria_monocytogenes_serotype_4b_str_CLIP_80459_568819 | Listeria_monocytogenes_1639_v20 | 0.9407 |
| Listeria_monocytogenes_serotype_4b_str_81-0861_1196161   | Listeria_monocytogenes_1639_v20 | 0.93   |
| Listeria_monocytogenes_serotype_4b_str_81-0592_1196160   | Listeria_monocytogenes_1639_v20 | 0.931  |
| Listeria_monocytogenes_serotype_4b_str_81-0558_1196159   | Listeria_monocytogenes_1639_v20 | 0.9318 |
| Listeria_monocytogenes_serotype_4b_str_10-0809_1196162   | Listeria_monocytogenes_1639_v20 | 0.9314 |
| Listeria_monocytogenes_serotype_4b_str_02-6680_1196175   | Listeria_monocytogenes_1639_v20 | 0.9386 |
| Listeria_monocytogenes_serotype_4b_str_02-6679_1196174   | Listeria_monocytogenes_1639_v20 | 0.9386 |
| Listeria_monocytogenes_serotype_4b_str_02-1792_1196173   | Listeria_monocytogenes_1639_v20 | 0.9329 |
| Listeria_monocytogenes_serotype_4b_str_02-1289_1196172   | Listeria_monocytogenes_1639_v20 | 0.9329 |
| Listeria_monocytogenes_serotype_4b_str_02-1103_1196171   | Listeria_monocytogenes_1639_v20 | 0.9329 |
| Listeria_monocytogenes_serotype_3c_str_10-5027_1196195   | Listeria_monocytogenes_1639_v20 | 0.9448 |
| Listeria_monocytogenes_serotype_1_2c_str_10-5026_1196194 | Listeria_monocytogenes_1639_v20 | 0.9459 |
| Listeria_monocytogenes_serotype_1_2c_str_10-5025_1196193 | Listeria_monocytogenes_1639_v20 | 0.9459 |
| Listeria_monocytogenes_serotype_1_2b_str_10-0811_1196164 | Listeria_monocytogenes_1639_v20 | 0.9428 |
| Listeria_monocytogenes_serotype_1_2b_str_10-0810_1196163 | Listeria_monocytogenes_1639_v20 | 0.9428 |
| Listeria_monocytogenes_serotype_1_2a_str_99-6370_1196179 | Listeria_monocytogenes_1639_v20 | 0.9317 |
| Listeria_monocytogenes_serotype_1_2a_str_98-2035_1196178 | Listeria_monocytogenes_1639_v20 | 0.9317 |
| Listeria_monocytogenes_serotype_1_2a_str_95-0093_1196177 | Listeria_monocytogenes_1639_v20 | 0.936  |
| Listeria_monocytogenes_serotype_1_2a_str_88-0478_1196176 | Listeria_monocytogenes_1639_v20 | 0.9356 |
| Listeria_monocytogenes_serotype_1_2a_str_10-5024_1196192 | Listeria_monocytogenes_1639_v20 | 0.9364 |
| Listeria_monocytogenes_serotype_1_2a_str_10-4758_1196168 | Listeria_monocytogenes_1639_v20 | 0.9335 |
| Listeria_monocytogenes_serotype_1_2a_str_10-4754_1196167 | Listeria_monocytogenes_1639_v20 | 0.9338 |
| Listeria_monocytogenes_serotype_1_2a_str_10-1321_1196191 | Listeria_monocytogenes_1639_v20 | 0.9364 |
| Listeria_monocytogenes_serotype_1_2a_str_10-1047_1196190 | Listeria_monocytogenes_1639_v20 | 0.9356 |
| Listeria_monocytogenes_serotype_1_2a_str_10-1046_1196189 | Listeria_monocytogenes_1639_v20 | 0.9356 |
| Listeria_monocytogenes_serotype_1_2a_str_10-0934_1196170 | Listeria_monocytogenes_1639_v20 | 0.9296 |
| Listeria_monocytogenes_serotype_1_2a_str_10-0933_1196169 | Listeria_monocytogenes_1639_v20 | 0.9296 |
| Listeria_monocytogenes_serotype_1_2a_str_10-0815_1196188 | Listeria_monocytogenes_1639_v20 | 0.9323 |
| Listeria_monocytogenes_serotype_1_2a_str_10-0814_1196187 | Listeria_monocytogenes_1639_v20 | 0.9367 |
| Listeria_monocytogenes_serotype_1_2a_str_10-0813_1196166 | Listeria_monocytogenes_1639_v20 | 0.9383 |
| Listeria_monocytogenes_serotype_1_2a_str_10-0812_1196165 | Listeria_monocytogenes_1639_v20 | 0.9383 |
| Listeria_monocytogenes_serotype_1_2a_str_08-7669_1196186 | Listeria_monocytogenes_1639_v20 | 0.9291 |
| Listeria_monocytogenes_serotype_1_2a_str_08-7374_1196185 | Listeria_monocytogenes_1639_v20 | 0.9364 |

|                                                          |                                 |        |
|----------------------------------------------------------|---------------------------------|--------|
| Listeria_monocytogenes_serotype_1_2a_str_08-6997_1196184 | Listeria_monocytogenes_1639_v20 | 0.9323 |
| Listeria_monocytogenes_serotype_1_2a_str_08-6569_1196183 | Listeria_monocytogenes_1639_v20 | 0.9323 |
| Listeria_monocytogenes_serotype_1_2a_str_08-6056_1196182 | Listeria_monocytogenes_1639_v20 | 0.9323 |
| Listeria_monocytogenes_serotype_1_2a_str_04-5457_1196181 | Listeria_monocytogenes_1639_v20 | 0.9364 |
| Listeria_monocytogenes_serotype_1_2a_str_02-5993_1196180 | Listeria_monocytogenes_1639_v20 | 0.9364 |
| Listeria_monocytogenes_R479a_1437838                     | Listeria_monocytogenes_1639_v20 | 0.9441 |
| Listeria_monocytogenes_N53-1_1234142                     | Listeria_monocytogenes_1639_v20 | 0.8811 |
| Listeria_monocytogenes_M7_1030009                        | Listeria_monocytogenes_1639_v20 | 0.9    |
| Listeria_monocytogenes_LO28_393132                       | Listeria_monocytogenes_1639_v20 | 0.9338 |
| Listeria_monocytogenes_L99_563174                        | Listeria_monocytogenes_1639_v20 | 0.9003 |
| Listeria_monocytogenes_L312_882094                       | Listeria_monocytogenes_1639_v20 | 0.9411 |
| Listeria_monocytogenes_J1816_930781                      | Listeria_monocytogenes_1639_v20 | 0.9328 |
| Listeria_monocytogenes_J1-220_930782                     | Listeria_monocytogenes_1639_v20 | 0.9301 |
| Listeria_monocytogenes_J0161_393130                      | Listeria_monocytogenes_1639_v20 | 0.9379 |
| Listeria_monocytogenes_HCC23_552536                      | Listeria_monocytogenes_1639_v20 | 0.8996 |
| Listeria_monocytogenes_FSL_R2-561_393126                 | Listeria_monocytogenes_1639_v20 | 0.9401 |
| Listeria_monocytogenes_FSL_J1-208_393119                 | Listeria_monocytogenes_1639_v20 | 0.892  |
| Listeria_monocytogenes_FSL_J1-175_393118                 | Listeria_monocytogenes_1639_v20 | 0.9531 |
| Listeria_monocytogenes_Finland_1998_393127               | Listeria_monocytogenes_1639_v20 | 0.933  |
| Listeria_monocytogenes_EGD-e_169963_v1                   | Listeria_monocytogenes_1639_v20 | 0.9284 |
| Listeria_monocytogenes_EGD-e_169963                      | Listeria_monocytogenes_1639_v20 | 0.9287 |
| Listeria_monocytogenes_EGD_1334565                       | Listeria_monocytogenes_1639_v20 | 0.9367 |
| Listeria_monocytogenes_CFSAN002349_1299895               | Listeria_monocytogenes_1639_v20 | 0.9401 |
| Listeria_monocytogenes_ATCC_19117_882095_v1              | Listeria_monocytogenes_1639_v20 | 0.932  |
| Listeria_monocytogenes_ATCC_19117_882095                 | Listeria_monocytogenes_1639_v20 | 0.9316 |
| Listeria_monocytogenes_6179_1288295                      | Listeria_monocytogenes_1639_v20 | 0.9398 |
| Listeria_monocytogenes_1639_v9                           | Listeria_monocytogenes_1639_v20 | 0.9461 |
| Listeria_monocytogenes_1639_v99                          | Listeria_monocytogenes_1639_v20 | 0.9413 |
| Listeria_monocytogenes_1639_v98                          | Listeria_monocytogenes_1639_v20 | 0.9301 |
| Listeria_monocytogenes_1639_v97                          | Listeria_monocytogenes_1639_v20 | 0.9408 |
| Listeria_monocytogenes_1639_v96                          | Listeria_monocytogenes_1639_v20 | 0.942  |
| Listeria_monocytogenes_1639_v95                          | Listeria_monocytogenes_1639_v20 | 0.9421 |
| Listeria_monocytogenes_1639_v94                          | Listeria_monocytogenes_1639_v20 | 0.9428 |
| Listeria_monocytogenes_1639_v93                          | Listeria_monocytogenes_1639_v20 | 0.9334 |
| Listeria_monocytogenes_1639_v92                          | Listeria_monocytogenes_1639_v20 | 0.9424 |
| Listeria_monocytogenes_1639_v91                          | Listeria_monocytogenes_1639_v20 | 0.9371 |
| Listeria_monocytogenes_1639_v90                          | Listeria_monocytogenes_1639_v20 | 0.9301 |
| Listeria_monocytogenes_1639_v8                           | Listeria_monocytogenes_1639_v20 | 0.9314 |
| Listeria_monocytogenes_1639_v89                          | Listeria_monocytogenes_1639_v20 | 0.9372 |
| Listeria_monocytogenes_1639_v88                          | Listeria_monocytogenes_1639_v20 | 0.9358 |
| Listeria_monocytogenes_1639_v87                          | Listeria_monocytogenes_1639_v20 | 0.9346 |
| Listeria_monocytogenes_1639_v86                          | Listeria_monocytogenes_1639_v20 | 0.9342 |
| Listeria_monocytogenes_1639_v85                          | Listeria_monocytogenes_1639_v20 | 0.9293 |
| Listeria_monocytogenes_1639_v84                          | Listeria_monocytogenes_1639_v20 | 0.9401 |
| Listeria_monocytogenes_1639_v83                          | Listeria_monocytogenes_1639_v20 | 0.9287 |
| Listeria_monocytogenes_1639_v82                          | Listeria_monocytogenes_1639_v20 | 0.9284 |
| Listeria_monocytogenes_1639_v81                          | Listeria_monocytogenes_1639_v20 | 0.9443 |
| Listeria_monocytogenes_1639_v80                          | Listeria_monocytogenes_1639_v20 | 0.9456 |
| Listeria_monocytogenes_1639_v7                           | Listeria_monocytogenes_1639_v20 | 0.9314 |
| Listeria_monocytogenes_1639_v79                          | Listeria_monocytogenes_1639_v20 | 0.9418 |
| Listeria_monocytogenes_1639_v78                          | Listeria_monocytogenes_1639_v20 | 0.9451 |
| Listeria_monocytogenes_1639_v77                          | Listeria_monocytogenes_1639_v20 | 0.9282 |
| Listeria_monocytogenes_1639_v76                          | Listeria_monocytogenes_1639_v20 | 0.933  |
| Listeria_monocytogenes_1639_v75                          | Listeria_monocytogenes_1639_v20 | 0.9003 |
| Listeria_monocytogenes_1639_v74                          | Listeria_monocytogenes_1639_v20 | 0.9217 |
| Listeria_monocytogenes_1639_v73                          | Listeria_monocytogenes_1639_v20 | 0.9393 |
| Listeria_monocytogenes_1639_v72                          | Listeria_monocytogenes_1639_v20 | 0.9261 |
| Listeria_monocytogenes_1639_v71                          | Listeria_monocytogenes_1639_v20 | 0.931  |
| Listeria_monocytogenes_1639_v70                          | Listeria_monocytogenes_1639_v20 | 0.9432 |
| Listeria_monocytogenes_1639_v6                           | Listeria_monocytogenes_1639_v20 | 0.931  |
| Listeria_monocytogenes_1639_v69                          | Listeria_monocytogenes_1639_v20 | 0.931  |
| Listeria_monocytogenes_1639_v68                          | Listeria_monocytogenes_1639_v20 | 0.9313 |
| Listeria_monocytogenes_1639_v67                          | Listeria_monocytogenes_1639_v20 | 0.9565 |
| Listeria_monocytogenes_1639_v66                          | Listeria_monocytogenes_1639_v20 | 0.9365 |
| Listeria_monocytogenes_1639_v65                          | Listeria_monocytogenes_1639_v20 | 0.9318 |
| Listeria_monocytogenes_1639_v64                          | Listeria_monocytogenes_1639_v20 | 0.93   |
| Listeria_monocytogenes_1639_v63                          | Listeria_monocytogenes_1639_v20 | 0.9567 |
| Listeria_monocytogenes_1639_v62                          | Listeria_monocytogenes_1639_v20 | 0.9412 |
| Listeria_monocytogenes_1639_v61                          | Listeria_monocytogenes_1639_v20 | 0.9362 |
| Listeria_monocytogenes_1639_v60                          | Listeria_monocytogenes_1639_v20 | 0.9398 |
| Listeria_monocytogenes_1639_v5                           | Listeria_monocytogenes_1639_v20 | 0.9138 |
| Listeria_monocytogenes_1639_v59                          | Listeria_monocytogenes_1639_v20 | 0.9317 |
| Listeria_monocytogenes_1639_v58                          | Listeria_monocytogenes_1639_v20 | 0.9294 |
| Listeria_monocytogenes_1639_v57                          | Listeria_monocytogenes_1639_v20 | 0.9284 |
| Listeria_monocytogenes_1639_v56                          | Listeria_monocytogenes_1639_v20 | 0.9346 |
| Listeria_monocytogenes_1639_v55                          | Listeria_monocytogenes_1639_v20 | 0.9374 |
| Listeria_monocytogenes_1639_v54                          | Listeria_monocytogenes_1639_v20 | 0.9163 |
| Listeria_monocytogenes_1639_v53                          | Listeria_monocytogenes_1639_v20 | 0.9191 |
| Listeria_monocytogenes_1639_v52                          | Listeria_monocytogenes_1639_v20 | 0.9337 |
| Listeria_monocytogenes_1639_v51                          | Listeria_monocytogenes_1639_v20 | 0.931  |
| Listeria_monocytogenes_1639_v50                          | Listeria_monocytogenes_1639_v20 | 0.9353 |
| Listeria_monocytogenes_1639_v4                           | Listeria_monocytogenes_1639_v20 | 0.9269 |
| Listeria_monocytogenes_1639_v49                          | Listeria_monocytogenes_1639_v20 | 0.9274 |
| Listeria_monocytogenes_1639_v48                          | Listeria_monocytogenes_1639_v20 | 0.94   |
| Listeria_monocytogenes_1639_v47                          | Listeria_monocytogenes_1639_v20 | 0.9346 |
| Listeria_monocytogenes_1639_v46                          | Listeria_monocytogenes_1639_v20 | 0.9351 |
| Listeria_monocytogenes_1639_v45                          | Listeria_monocytogenes_1639_v20 | 0.9356 |
| Listeria_monocytogenes_1639_v44                          | Listeria_monocytogenes_1639_v20 | 0.9364 |
| Listeria_monocytogenes_1639_v43                          | Listeria_monocytogenes_1639_v20 | 0.9364 |
| Listeria_monocytogenes_1639_v42                          | Listeria_monocytogenes_1639_v20 | 0.9193 |
| Listeria_monocytogenes_1639_v41                          | Listeria_monocytogenes_1639_v20 | 0.9202 |



|                                                          |                                 |        |
|----------------------------------------------------------|---------------------------------|--------|
| Listeria_monocytogenes_1639_v40                          | Listeria_monocytogenes_1639_v20 | 0.9353 |
| Listeria_monocytogenes_1639_v3                           | Listeria_monocytogenes_1639_v20 | 0.9276 |
| Listeria_monocytogenes_1639_v39                          | Listeria_monocytogenes_1639_v20 | 0.9578 |
| Listeria_monocytogenes_1639_v38                          | Listeria_monocytogenes_1639_v20 | 0.9241 |
| Listeria_monocytogenes_1639_v37                          | Listeria_monocytogenes_1639_v20 | 0.918  |
| Listeria_monocytogenes_1639_v36                          | Listeria_monocytogenes_1639_v20 | 0.9378 |
| Listeria_monocytogenes_1639_v35                          | Listeria_monocytogenes_1639_v20 | 0.9297 |
| Listeria_monocytogenes_1639_v34                          | Listeria_monocytogenes_1639_v20 | 0.9429 |
| Listeria_monocytogenes_1639_v33                          | Listeria_monocytogenes_1639_v20 | 0.9428 |
| Listeria_monocytogenes_1639_v32                          | Listeria_monocytogenes_1639_v20 | 0.9272 |
| Listeria_monocytogenes_1639_v31                          | Listeria_monocytogenes_1639_v20 | 0.9433 |
| Listeria_monocytogenes_1639_v30                          | Listeria_monocytogenes_1639_v20 | 0.9299 |
| Listeria_monocytogenes_1639_v2                           | Listeria_monocytogenes_1639_v20 | 0.9414 |
| Listeria_monocytogenes_1639_v29                          | Listeria_monocytogenes_1639_v20 | 0.9384 |
| Listeria_monocytogenes_1639_v28                          | Listeria_monocytogenes_1639_v20 | 0.9322 |
| Listeria_monocytogenes_1639_v27                          | Listeria_monocytogenes_1639_v20 | 0.9311 |
| Listeria_monocytogenes_1639_v26                          | Listeria_monocytogenes_1639_v20 | 0.9319 |
| Listeria_monocytogenes_1639_v25                          | Listeria_monocytogenes_1639_v20 | 0.9319 |
| Listeria_monocytogenes_1639_v24                          | Listeria_monocytogenes_1639_v20 | 0.9283 |
| Listeria_monocytogenes_1639_v23                          | Listeria_monocytogenes_1639_v20 | 0.9279 |
| Listeria_monocytogenes_1639_v22                          | Listeria_monocytogenes_1639_v20 | 0.9505 |
| Listeria_monocytogenes_1639_v21                          | Listeria_monocytogenes_1639_v20 | 0.9298 |
| Listeria_monocytogenes_1639_v20                          | Listeria_monocytogenes_1639_v20 | 0.0805 |
| Listeria_welshimeri_1643                                 | Listeria_monocytogenes_1639_v21 | 0.8814 |
| Listeria_welshimeri_serovar_6b_str_SLCC5334_386043       | Listeria_monocytogenes_1639_v21 | 0.881  |
| Listeria_seeligeri_serovar_1_2b_str_SLCC3954_683837      | Listeria_monocytogenes_1639_v21 | 0.8705 |
| Listeria_seeligeri_FSL_S4-171_702452                     | Listeria_monocytogenes_1639_v21 | 0.8162 |
| Listeria_seeligeri_FSL_N1-067_702453                     | Listeria_monocytogenes_1639_v21 | 0.8234 |
| Listeria_seeligeri_1640_v1                               | Listeria_monocytogenes_1639_v21 | 0.8759 |
| Listeria_seeligeri_1640                                  | Listeria_monocytogenes_1639_v21 | 0.8746 |
| Listeria_monocytogenes_WSLC1042_1457188                  | Listeria_monocytogenes_1639_v21 | 0.96   |
| Listeria_monocytogenes_WSLC1001_1457187                  | Listeria_monocytogenes_1639_v21 | 0.926  |
| Listeria_monocytogenes_SLCC7179_879090                   | Listeria_monocytogenes_1639_v21 | 0.9313 |
| Listeria_monocytogenes_SLCC5850_882096                   | Listeria_monocytogenes_1639_v21 | 0.9283 |
| Listeria_monocytogenes_SLCC2755_932919                   | Listeria_monocytogenes_1639_v21 | 0.927  |
| Listeria_monocytogenes_SLCC2540_879089                   | Listeria_monocytogenes_1639_v21 | 0.9405 |
| Listeria_monocytogenes_SLCC2479_882020                   | Listeria_monocytogenes_1639_v21 | 0.9198 |
| Listeria_monocytogenes_SLCC2378_879088                   | Listeria_monocytogenes_1639_v21 | 0.9611 |
| Listeria_monocytogenes_SLCC2376_882097                   | Listeria_monocytogenes_1639_v21 | 0.9216 |
| Listeria_monocytogenes_SLCC2372_932920                   | Listeria_monocytogenes_1639_v21 | 0.9131 |
| Listeria_monocytogenes_serotype_4b_str_LL195_1230340     | Listeria_monocytogenes_1639_v21 | 0.9564 |
| Listeria_monocytogenes_serotype_4b_str_LIS0087_1134669   | Listeria_monocytogenes_1639_v21 | 0.9137 |
| Listeria_monocytogenes_serotype_4b_str_F2365_265669      | Listeria_monocytogenes_1639_v21 | 0.9564 |
| Listeria_monocytogenes_serotype_4b_str_CLIP_80459_568819 | Listeria_monocytogenes_1639_v21 | 0.9522 |
| Listeria_monocytogenes_serotype_4b_str_81-0861_1196161   | Listeria_monocytogenes_1639_v21 | 0.9663 |
| Listeria_monocytogenes_serotype_4b_str_81-0592_1196160   | Listeria_monocytogenes_1639_v21 | 0.9674 |
| Listeria_monocytogenes_serotype_4b_str_81-0558_1196159   | Listeria_monocytogenes_1639_v21 | 0.9667 |
| Listeria_monocytogenes_serotype_4b_str_10-0809_1196162   | Listeria_monocytogenes_1639_v21 | 0.9674 |
| Listeria_monocytogenes_serotype_4b_str_02-6680_1196175   | Listeria_monocytogenes_1639_v21 | 0.9583 |
| Listeria_monocytogenes_serotype_4b_str_02-6679_1196174   | Listeria_monocytogenes_1639_v21 | 0.9583 |
| Listeria_monocytogenes_serotype_4b_str_02-1792_1196173   | Listeria_monocytogenes_1639_v21 | 0.9656 |
| Listeria_monocytogenes_serotype_4b_str_02-1289_1196172   | Listeria_monocytogenes_1639_v21 | 0.9656 |
| Listeria_monocytogenes_serotype_4b_str_02-1103_1196171   | Listeria_monocytogenes_1639_v21 | 0.9656 |
| Listeria_monocytogenes_serotype_3c_str_10-5027_1196195   | Listeria_monocytogenes_1639_v21 | 0.922  |
| Listeria_monocytogenes_serotype_1_2c_str_10-5026_1196194 | Listeria_monocytogenes_1639_v21 | 0.9221 |
| Listeria_monocytogenes_serotype_1_2c_str_10-5025_1196193 | Listeria_monocytogenes_1639_v21 | 0.9221 |
| Listeria_monocytogenes_serotype_1_2b_str_10-0811_1196164 | Listeria_monocytogenes_1639_v21 | 0.9441 |
| Listeria_monocytogenes_serotype_1_2b_str_10-0810_1196163 | Listeria_monocytogenes_1639_v21 | 0.9441 |
| Listeria_monocytogenes_serotype_1_2a_str_99-6370_1196179 | Listeria_monocytogenes_1639_v21 | 0.9136 |
| Listeria_monocytogenes_serotype_1_2a_str_98-2035_1196178 | Listeria_monocytogenes_1639_v21 | 0.9136 |
| Listeria_monocytogenes_serotype_1_2a_str_95-0093_1196177 | Listeria_monocytogenes_1639_v21 | 0.9182 |
| Listeria_monocytogenes_serotype_1_2a_str_88-0478_1196176 | Listeria_monocytogenes_1639_v21 | 0.9167 |
| Listeria_monocytogenes_serotype_1_2a_str_10-5024_1196192 | Listeria_monocytogenes_1639_v21 | 0.9178 |
| Listeria_monocytogenes_serotype_1_2a_str_10-4758_1196168 | Listeria_monocytogenes_1639_v21 | 0.9299 |
| Listeria_monocytogenes_serotype_1_2a_str_10-4754_1196167 | Listeria_monocytogenes_1639_v21 | 0.9302 |
| Listeria_monocytogenes_serotype_1_2a_str_10-1321_1196191 | Listeria_monocytogenes_1639_v21 | 0.9178 |
| Listeria_monocytogenes_serotype_1_2a_str_10-1047_1196190 | Listeria_monocytogenes_1639_v21 | 0.9177 |
| Listeria_monocytogenes_serotype_1_2a_str_10-1046_1196189 | Listeria_monocytogenes_1639_v21 | 0.9177 |
| Listeria_monocytogenes_serotype_1_2a_str_10-0934_1196170 | Listeria_monocytogenes_1639_v21 | 0.9267 |
| Listeria_monocytogenes_serotype_1_2a_str_10-0933_1196169 | Listeria_monocytogenes_1639_v21 | 0.9267 |
| Listeria_monocytogenes_serotype_1_2a_str_10-0815_1196188 | Listeria_monocytogenes_1639_v21 | 0.9138 |
| Listeria_monocytogenes_serotype_1_2a_str_10-0814_1196187 | Listeria_monocytogenes_1639_v21 | 0.9182 |
| Listeria_monocytogenes_serotype_1_2a_str_10-0813_1196166 | Listeria_monocytogenes_1639_v21 | 0.9303 |
| Listeria_monocytogenes_serotype_1_2a_str_10-0812_1196165 | Listeria_monocytogenes_1639_v21 | 0.9303 |
| Listeria_monocytogenes_serotype_1_2a_str_08-7669_1196186 | Listeria_monocytogenes_1639_v21 | 0.9181 |
| Listeria_monocytogenes_serotype_1_2a_str_08-7374_1196185 | Listeria_monocytogenes_1639_v21 | 0.9178 |
| Listeria_monocytogenes_serotype_1_2a_str_08-6997_1196184 | Listeria_monocytogenes_1639_v21 | 0.9138 |
| Listeria_monocytogenes_serotype_1_2a_str_08-6569_1196183 | Listeria_monocytogenes_1639_v21 | 0.9138 |
| Listeria_monocytogenes_serotype_1_2a_str_08-6056_1196182 | Listeria_monocytogenes_1639_v21 | 0.9138 |
| Listeria_monocytogenes_serotype_1_2a_str_04-5457_1196181 | Listeria_monocytogenes_1639_v21 | 0.9178 |
| Listeria_monocytogenes_serotype_1_2a_str_02-5993_1196180 | Listeria_monocytogenes_1639_v21 | 0.9178 |
| Listeria_monocytogenes_R479a_1437838                     | Listeria_monocytogenes_1639_v21 | 0.9149 |
| Listeria_monocytogenes_N53-1_1234142                     | Listeria_monocytogenes_1639_v21 | 0.8807 |
| Listeria_monocytogenes_M7_1030009                        | Listeria_monocytogenes_1639_v21 | 0.9139 |
| Listeria_monocytogenes_LO28_393132                       | Listeria_monocytogenes_1639_v21 | 0.9266 |
| Listeria_monocytogenes_L99_563174                        | Listeria_monocytogenes_1639_v21 | 0.9142 |
| Listeria_monocytogenes_L312_882094                       | Listeria_monocytogenes_1639_v21 | 0.9525 |
| Listeria_monocytogenes_J1816_930781                      | Listeria_monocytogenes_1639_v21 | 0.9392 |
| Listeria_monocytogenes_J1-220_930782                     | Listeria_monocytogenes_1639_v21 | 0.9886 |
| Listeria_monocytogenes_J0161_393130                      | Listeria_monocytogenes_1639_v21 | 0.9259 |
| Listeria_monocytogenes_HCC23_552536                      | Listeria_monocytogenes_1639_v21 | 0.9135 |

[illegible]

|                                                          |                                 |        |
|----------------------------------------------------------|---------------------------------|--------|
| Listeria_monocytogenes_1639_v27                          | Listeria_monocytogenes_1639_v21 | 0.9128 |
| Listeria_monocytogenes_1639_v26                          | Listeria_monocytogenes_1639_v21 | 0.9132 |
| Listeria_monocytogenes_1639_v25                          | Listeria_monocytogenes_1639_v21 | 0.9128 |
| Listeria_monocytogenes_1639_v24                          | Listeria_monocytogenes_1639_v21 | 0.9919 |
| Listeria_monocytogenes_1639_v23                          | Listeria_monocytogenes_1639_v21 | 0.9912 |
| Listeria_monocytogenes_1639_v22                          | Listeria_monocytogenes_1639_v21 | 0.9466 |
| Listeria_monocytogenes_1639_v21                          | Listeria_monocytogenes_1639_v21 | 0.0709 |
| Listeria_welshimeri_1643                                 | Listeria_monocytogenes_1639_v22 | 0.8692 |
| Listeria_welshimeri_serovar_6b_str_SLCC5334_386043       | Listeria_monocytogenes_1639_v22 | 0.8685 |
| Listeria_seeligeri_serovar_1_2b_str_SLCC3954_683837      | Listeria_monocytogenes_1639_v22 | 0.8758 |
| Listeria_seeligeri_FSL_S4-171_702452                     | Listeria_monocytogenes_1639_v22 | 0.8213 |
| Listeria_seeligeri_FSL_N1-067_702453                     | Listeria_monocytogenes_1639_v22 | 0.8337 |
| Listeria_seeligeri_1640_v1                               | Listeria_monocytogenes_1639_v22 | 0.877  |
| Listeria_seeligeri_1640                                  | Listeria_monocytogenes_1639_v22 | 0.879  |
| Listeria_monocytogenes_WSLC1042_1457188                  | Listeria_monocytogenes_1639_v22 | 0.9397 |
| Listeria_monocytogenes_WSLC1001_1457187                  | Listeria_monocytogenes_1639_v22 | 0.9373 |
| Listeria_monocytogenes_SLCC7179_879090                   | Listeria_monocytogenes_1639_v22 | 0.9409 |
| Listeria_monocytogenes_SLCC5850_882096                   | Listeria_monocytogenes_1639_v22 | 0.94   |
| Listeria_monocytogenes_SLCC2755_932919                   | Listeria_monocytogenes_1639_v22 | 0.9323 |
| Listeria_monocytogenes_SLCC2540_879089                   | Listeria_monocytogenes_1639_v22 | 0.9567 |
| Listeria_monocytogenes_SLCC2479_882020                   | Listeria_monocytogenes_1639_v22 | 0.9433 |
| Listeria_monocytogenes_SLCC2378_879088                   | Listeria_monocytogenes_1639_v22 | 0.9411 |
| Listeria_monocytogenes_SLCC2376_882097                   | Listeria_monocytogenes_1639_v22 | 0.9278 |
| Listeria_monocytogenes_SLCC2372_932920                   | Listeria_monocytogenes_1639_v22 | 0.9356 |
| Listeria_monocytogenes_serotype_4b_str_LL195_1230340     | Listeria_monocytogenes_1639_v22 | 0.9468 |
| Listeria_monocytogenes_serotype_4b_str_LIS0087_1134669   | Listeria_monocytogenes_1639_v22 | 0.9285 |
| Listeria_monocytogenes_serotype_4b_str_F2365_265669      | Listeria_monocytogenes_1639_v22 | 0.9468 |
| Listeria_monocytogenes_serotype_4b_str_CLIP_80459_568819 | Listeria_monocytogenes_1639_v22 | 0.9474 |
| Listeria_monocytogenes_serotype_4b_str_81-0861_1196161   | Listeria_monocytogenes_1639_v22 | 0.9443 |
| Listeria_monocytogenes_serotype_4b_str_81-0592_1196160   | Listeria_monocytogenes_1639_v22 | 0.9454 |
| Listeria_monocytogenes_serotype_4b_str_81-0558_1196159   | Listeria_monocytogenes_1639_v22 | 0.945  |
| Listeria_monocytogenes_serotype_4b_str_10-0809_1196162   | Listeria_monocytogenes_1639_v22 | 0.9458 |
| Listeria_monocytogenes_serotype_4b_str_02-6680_1196175   | Listeria_monocytogenes_1639_v22 | 0.9427 |
| Listeria_monocytogenes_serotype_4b_str_02-6679_1196174   | Listeria_monocytogenes_1639_v22 | 0.9427 |
| Listeria_monocytogenes_serotype_4b_str_02-1792_1196173   | Listeria_monocytogenes_1639_v22 | 0.9469 |
| Listeria_monocytogenes_serotype_4b_str_02-1289_1196172   | Listeria_monocytogenes_1639_v22 | 0.9469 |
| Listeria_monocytogenes_serotype_4b_str_02-1103_1196171   | Listeria_monocytogenes_1639_v22 | 0.9469 |
| Listeria_monocytogenes_serotype_3c_str_10-5027_1196195   | Listeria_monocytogenes_1639_v22 | 0.9466 |
| Listeria_monocytogenes_serotype_1_2c_str_10-5026_1196194 | Listeria_monocytogenes_1639_v22 | 0.9481 |
| Listeria_monocytogenes_serotype_1_2c_str_10-5025_1196193 | Listeria_monocytogenes_1639_v22 | 0.9481 |
| Listeria_monocytogenes_serotype_1_2b_str_10-0811_1196164 | Listeria_monocytogenes_1639_v22 | 0.979  |
| Listeria_monocytogenes_serotype_1_2b_str_10-0810_1196163 | Listeria_monocytogenes_1639_v22 | 0.979  |
| Listeria_monocytogenes_serotype_1_2a_str_99-6370_1196179 | Listeria_monocytogenes_1639_v22 | 0.9356 |
| Listeria_monocytogenes_serotype_1_2a_str_98-2035_1196178 | Listeria_monocytogenes_1639_v22 | 0.9356 |
| Listeria_monocytogenes_serotype_1_2a_str_95-0093_1196177 | Listeria_monocytogenes_1639_v22 | 0.94   |
| Listeria_monocytogenes_serotype_1_2a_str_88-0478_1196176 | Listeria_monocytogenes_1639_v22 | 0.9396 |
| Listeria_monocytogenes_serotype_1_2a_str_10-5024_1196192 | Listeria_monocytogenes_1639_v22 | 0.9407 |
| Listeria_monocytogenes_serotype_1_2a_str_10-4758_1196168 | Listeria_monocytogenes_1639_v22 | 0.9435 |
| Listeria_monocytogenes_serotype_1_2a_str_10-4754_1196167 | Listeria_monocytogenes_1639_v22 | 0.9435 |
| Listeria_monocytogenes_serotype_1_2a_str_10-1321_1196191 | Listeria_monocytogenes_1639_v22 | 0.9407 |
| Listeria_monocytogenes_serotype_1_2a_str_10-1047_1196190 | Listeria_monocytogenes_1639_v22 | 0.9403 |
| Listeria_monocytogenes_serotype_1_2a_str_10-1046_1196189 | Listeria_monocytogenes_1639_v22 | 0.9403 |
| Listeria_monocytogenes_serotype_1_2a_str_10-0934_1196170 | Listeria_monocytogenes_1639_v22 | 0.9367 |
| Listeria_monocytogenes_serotype_1_2a_str_10-0933_1196169 | Listeria_monocytogenes_1639_v22 | 0.9367 |
| Listeria_monocytogenes_serotype_1_2a_str_10-0815_1196188 | Listeria_monocytogenes_1639_v22 | 0.9366 |
| Listeria_monocytogenes_serotype_1_2a_str_10-0814_1196187 | Listeria_monocytogenes_1639_v22 | 0.9407 |
| Listeria_monocytogenes_serotype_1_2a_str_10-0813_1196166 | Listeria_monocytogenes_1639_v22 | 0.9498 |
| Listeria_monocytogenes_serotype_1_2a_str_10-0812_1196165 | Listeria_monocytogenes_1639_v22 | 0.9498 |
| Listeria_monocytogenes_serotype_1_2a_str_08-7669_1196186 | Listeria_monocytogenes_1639_v22 | 0.9353 |
| Listeria_monocytogenes_serotype_1_2a_str_08-7374_1196185 | Listeria_monocytogenes_1639_v22 | 0.9407 |
| Listeria_monocytogenes_serotype_1_2a_str_08-6997_1196184 | Listeria_monocytogenes_1639_v22 | 0.9366 |
| Listeria_monocytogenes_serotype_1_2a_str_08-6569_1196183 | Listeria_monocytogenes_1639_v22 | 0.9366 |
| Listeria_monocytogenes_serotype_1_2a_str_08-6056_1196182 | Listeria_monocytogenes_1639_v22 | 0.9366 |
| Listeria_monocytogenes_serotype_1_2a_str_04-5457_1196181 | Listeria_monocytogenes_1639_v22 | 0.9407 |
| Listeria_monocytogenes_serotype_1_2a_str_02-5993_1196180 | Listeria_monocytogenes_1639_v22 | 0.9404 |
| Listeria_monocytogenes_R479a_1437838                     | Listeria_monocytogenes_1639_v22 | 0.9378 |
| Listeria_monocytogenes_N53-1_1234142                     | Listeria_monocytogenes_1639_v22 | 0.8937 |
| Listeria_monocytogenes_M7_1030009                        | Listeria_monocytogenes_1639_v22 | 0.914  |
| Listeria_monocytogenes_LO28_393132                       | Listeria_monocytogenes_1639_v22 | 0.9449 |
| Listeria_monocytogenes_L99_563174                        | Listeria_monocytogenes_1639_v22 | 0.9146 |
| Listeria_monocytogenes_L312_882094                       | Listeria_monocytogenes_1639_v22 | 0.9478 |
| Listeria_monocytogenes_J1816_930781                      | Listeria_monocytogenes_1639_v22 | 0.9434 |
| Listeria_monocytogenes_J1-220_930782                     | Listeria_monocytogenes_1639_v22 | 0.9462 |
| Listeria_monocytogenes_J0161_393130                      | Listeria_monocytogenes_1639_v22 | 0.9426 |
| Listeria_monocytogenes_HCC23_552536                      | Listeria_monocytogenes_1639_v22 | 0.9136 |
| Listeria_monocytogenes_FSL_R2-561_393126                 | Listeria_monocytogenes_1639_v22 | 0.9437 |
| Listeria_monocytogenes_FSL_J1-208_393119                 | Listeria_monocytogenes_1639_v22 | 0.8968 |
| Listeria_monocytogenes_FSL_J1-175_393118                 | Listeria_monocytogenes_1639_v22 | 0.9591 |
| Listeria_monocytogenes_Finland_1998_393127               | Listeria_monocytogenes_1639_v22 | 0.937  |
| Listeria_monocytogenes_EGD-e_169963_v1                   | Listeria_monocytogenes_1639_v22 | 0.945  |
| Listeria_monocytogenes_EGD-e_169963                      | Listeria_monocytogenes_1639_v22 | 0.9454 |
| Listeria_monocytogenes_EGD_1334565                       | Listeria_monocytogenes_1639_v22 | 0.9407 |
| Listeria_monocytogenes_CFSAN002349_1299895               | Listeria_monocytogenes_1639_v22 | 0.9488 |
| Listeria_monocytogenes_ATCC_19117_882095_v1              | Listeria_monocytogenes_1639_v22 | 0.9417 |
| Listeria_monocytogenes_ATCC_19117_882095                 | Listeria_monocytogenes_1639_v22 | 0.9417 |
| Listeria_monocytogenes_6179_1288295                      | Listeria_monocytogenes_1639_v22 | 0.939  |
| Listeria_monocytogenes_1639_v9                           | Listeria_monocytogenes_1639_v22 | 0.9545 |
| Listeria_monocytogenes_1639_v99                          | Listeria_monocytogenes_1639_v22 | 0.9438 |
| Listeria_monocytogenes_1639_v98                          | Listeria_monocytogenes_1639_v22 | 0.9422 |
| Listeria_monocytogenes_1639_v97                          | Listeria_monocytogenes_1639_v22 | 0.9448 |
| Listeria_monocytogenes_1639_v96                          | Listeria_monocytogenes_1639_v22 | 0.9435 |

[illegible]

|                                                          |                                 |        |
|----------------------------------------------------------|---------------------------------|--------|
| Listeria_monocytogenes_SLCC5850_882096                   | Listeria_monocytogenes_1639_v23 | 0.9283 |
| Listeria_monocytogenes_SLCC2755_932919                   | Listeria_monocytogenes_1639_v23 | 0.9274 |
| Listeria_monocytogenes_SLCC2540_879089                   | Listeria_monocytogenes_1639_v23 | 0.9408 |
| Listeria_monocytogenes_SLCC2479_882020                   | Listeria_monocytogenes_1639_v23 | 0.9209 |
| Listeria_monocytogenes_SLCC2378_879088                   | Listeria_monocytogenes_1639_v23 | 0.9615 |
| Listeria_monocytogenes_SLCC2376_882097                   | Listeria_monocytogenes_1639_v23 | 0.9216 |
| Listeria_monocytogenes_SLCC2372_932920                   | Listeria_monocytogenes_1639_v23 | 0.9142 |
| Listeria_monocytogenes_serotype_4b_str_LL195_1230340     | Listeria_monocytogenes_1639_v23 | 0.9567 |
| Listeria_monocytogenes_serotype_4b_str_LIS0087_1134669   | Listeria_monocytogenes_1639_v23 | 0.9122 |
| Listeria_monocytogenes_serotype_4b_str_F2365_265669      | Listeria_monocytogenes_1639_v23 | 0.9567 |
| Listeria_monocytogenes_serotype_4b_str_CLIP_80459_568819 | Listeria_monocytogenes_1639_v23 | 0.9525 |
| Listeria_monocytogenes_serotype_4b_str_81-0861_1196161   | Listeria_monocytogenes_1639_v23 | 0.9656 |
| Listeria_monocytogenes_serotype_4b_str_81-0592_1196160   | Listeria_monocytogenes_1639_v23 | 0.9667 |
| Listeria_monocytogenes_serotype_4b_str_81-0558_1196159   | Listeria_monocytogenes_1639_v23 | 0.9663 |
| Listeria_monocytogenes_serotype_4b_str_10-0809_1196162   | Listeria_monocytogenes_1639_v23 | 0.9667 |
| Listeria_monocytogenes_serotype_4b_str_02-6680_1196175   | Listeria_monocytogenes_1639_v23 | 0.9583 |
| Listeria_monocytogenes_serotype_4b_str_02-6679_1196174   | Listeria_monocytogenes_1639_v23 | 0.9583 |
| Listeria_monocytogenes_serotype_4b_str_02-1792_1196173   | Listeria_monocytogenes_1639_v23 | 0.9689 |
| Listeria_monocytogenes_serotype_4b_str_02-1289_1196172   | Listeria_monocytogenes_1639_v23 | 0.9689 |
| Listeria_monocytogenes_serotype_4b_str_02-1103_1196171   | Listeria_monocytogenes_1639_v23 | 0.9689 |
| Listeria_monocytogenes_serotype_3c_str_10-5027_1196195   | Listeria_monocytogenes_1639_v23 | 0.9228 |
| Listeria_monocytogenes_serotype_1_2c_str_10-5026_1196194 | Listeria_monocytogenes_1639_v23 | 0.9235 |
| Listeria_monocytogenes_serotype_1_2c_str_10-5025_1196193 | Listeria_monocytogenes_1639_v23 | 0.9235 |
| Listeria_monocytogenes_serotype_1_2b_str_10-0811_1196164 | Listeria_monocytogenes_1639_v23 | 0.9444 |
| Listeria_monocytogenes_serotype_1_2b_str_10-0810_1196163 | Listeria_monocytogenes_1639_v23 | 0.9444 |
| Listeria_monocytogenes_serotype_1_2a_str_99-6370_1196179 | Listeria_monocytogenes_1639_v23 | 0.9139 |
| Listeria_monocytogenes_serotype_1_2a_str_98-2035_1196178 | Listeria_monocytogenes_1639_v23 | 0.9139 |
| Listeria_monocytogenes_serotype_1_2a_str_95-0093_1196177 | Listeria_monocytogenes_1639_v23 | 0.9182 |
| Listeria_monocytogenes_serotype_1_2a_str_88-0478_1196176 | Listeria_monocytogenes_1639_v23 | 0.9174 |
| Listeria_monocytogenes_serotype_1_2a_str_10-5024_1196192 | Listeria_monocytogenes_1639_v23 | 0.9185 |
| Listeria_monocytogenes_serotype_1_2a_str_10-4758_1196168 | Listeria_monocytogenes_1639_v23 | 0.9302 |
| Listeria_monocytogenes_serotype_1_2a_str_10-4754_1196167 | Listeria_monocytogenes_1639_v23 | 0.9302 |
| Listeria_monocytogenes_serotype_1_2a_str_10-1321_1196191 | Listeria_monocytogenes_1639_v23 | 0.9185 |
| Listeria_monocytogenes_serotype_1_2a_str_10-1047_1196190 | Listeria_monocytogenes_1639_v23 | 0.9181 |
| Listeria_monocytogenes_serotype_1_2a_str_10-1046_1196189 | Listeria_monocytogenes_1639_v23 | 0.9181 |
| Listeria_monocytogenes_serotype_1_2a_str_10-0934_1196170 | Listeria_monocytogenes_1639_v23 | 0.9267 |
| Listeria_monocytogenes_serotype_1_2a_str_10-0933_1196169 | Listeria_monocytogenes_1639_v23 | 0.9267 |
| Listeria_monocytogenes_serotype_1_2a_str_10-0815_1196188 | Listeria_monocytogenes_1639_v23 | 0.9142 |
| Listeria_monocytogenes_serotype_1_2a_str_10-0814_1196187 | Listeria_monocytogenes_1639_v23 | 0.9185 |
| Listeria_monocytogenes_serotype_1_2a_str_10-0813_1196166 | Listeria_monocytogenes_1639_v23 | 0.9299 |
| Listeria_monocytogenes_serotype_1_2a_str_10-0812_1196165 | Listeria_monocytogenes_1639_v23 | 0.9299 |
| Listeria_monocytogenes_serotype_1_2a_str_08-7669_1196186 | Listeria_monocytogenes_1639_v23 | 0.9188 |
| Listeria_monocytogenes_serotype_1_2a_str_08-7374_1196185 | Listeria_monocytogenes_1639_v23 | 0.9185 |
| Listeria_monocytogenes_serotype_1_2a_str_08-6997_1196184 | Listeria_monocytogenes_1639_v23 | 0.9142 |
| Listeria_monocytogenes_serotype_1_2a_str_08-6569_1196183 | Listeria_monocytogenes_1639_v23 | 0.9142 |
| Listeria_monocytogenes_serotype_1_2a_str_08-6056_1196182 | Listeria_monocytogenes_1639_v23 | 0.9142 |
| Listeria_monocytogenes_serotype_1_2a_str_04-5457_1196181 | Listeria_monocytogenes_1639_v23 | 0.9185 |
| Listeria_monocytogenes_serotype_1_2a_str_02-5993_1196180 | Listeria_monocytogenes_1639_v23 | 0.9182 |
| Listeria_monocytogenes_R479a_1437838                     | Listeria_monocytogenes_1639_v23 | 0.916  |
| Listeria_monocytogenes_N53-1_1234142                     | Listeria_monocytogenes_1639_v23 | 0.8807 |
| Listeria_monocytogenes_M7_1030009                        | Listeria_monocytogenes_1639_v23 | 0.915  |
| Listeria_monocytogenes_LO28_393132                       | Listeria_monocytogenes_1639_v23 | 0.9259 |
| Listeria_monocytogenes_L99_563174                        | Listeria_monocytogenes_1639_v23 | 0.9157 |
| Listeria_monocytogenes_L312_882094                       | Listeria_monocytogenes_1639_v23 | 0.9529 |
| Listeria_monocytogenes_J1816_930781                      | Listeria_monocytogenes_1639_v23 | 0.9399 |
| Listeria_monocytogenes_J1-220_930782                     | Listeria_monocytogenes_1639_v23 | 0.9916 |
| Listeria_monocytogenes_J0161_393130                      | Listeria_monocytogenes_1639_v23 | 0.9269 |
| Listeria_monocytogenes_HCC23_552536                      | Listeria_monocytogenes_1639_v23 | 0.915  |
| Listeria_monocytogenes_FSL_R2-561_393126                 | Listeria_monocytogenes_1639_v23 | 0.9214 |
| Listeria_monocytogenes_FSL_J1-208_393119                 | Listeria_monocytogenes_1639_v23 | 0.9032 |
| Listeria_monocytogenes_FSL_J1-175_393118                 | Listeria_monocytogenes_1639_v23 | 0.9477 |
| Listeria_monocytogenes_Finland_1998_393127               | Listeria_monocytogenes_1639_v23 | 0.9278 |
| Listeria_monocytogenes_EGD-e_169963_v1                   | Listeria_monocytogenes_1639_v23 | 0.93   |
| Listeria_monocytogenes_EGD-e_169963                      | Listeria_monocytogenes_1639_v23 | 0.9303 |
| Listeria_monocytogenes_EGD_1334565                       | Listeria_monocytogenes_1639_v23 | 0.929  |
| Listeria_monocytogenes_CFSAN002349_1299895               | Listeria_monocytogenes_1639_v23 | 0.9519 |
| Listeria_monocytogenes_ATCC_19117_882095_v1              | Listeria_monocytogenes_1639_v23 | 0.9786 |
| Listeria_monocytogenes_ATCC_19117_882095                 | Listeria_monocytogenes_1639_v23 | 0.9786 |
| Listeria_monocytogenes_6179_1288295                      | Listeria_monocytogenes_1639_v23 | 0.9178 |
| Listeria_monocytogenes_1639_v9                           | Listeria_monocytogenes_1639_v23 | 0.9307 |
| Listeria_monocytogenes_1639_v99                          | Listeria_monocytogenes_1639_v23 | 0.941  |
| Listeria_monocytogenes_1639_v98                          | Listeria_monocytogenes_1639_v23 | 0.9239 |
| Listeria_monocytogenes_1639_v97                          | Listeria_monocytogenes_1639_v23 | 0.9551 |
| Listeria_monocytogenes_1639_v96                          | Listeria_monocytogenes_1639_v23 | 0.94   |
| Listeria_monocytogenes_1639_v95                          | Listeria_monocytogenes_1639_v23 | 0.94   |
| Listeria_monocytogenes_1639_v94                          | Listeria_monocytogenes_1639_v23 | 0.94   |
| Listeria_monocytogenes_1639_v93                          | Listeria_monocytogenes_1639_v23 | 0.9144 |
| Listeria_monocytogenes_1639_v92                          | Listeria_monocytogenes_1639_v23 | 0.9414 |
| Listeria_monocytogenes_1639_v91                          | Listeria_monocytogenes_1639_v23 | 0.9705 |
| Listeria_monocytogenes_1639_v90                          | Listeria_monocytogenes_1639_v23 | 0.9239 |
| Listeria_monocytogenes_1639_v8                           | Listeria_monocytogenes_1639_v23 | 0.91   |
| Listeria_monocytogenes_1639_v89                          | Listeria_monocytogenes_1639_v23 | 0.962  |
| Listeria_monocytogenes_1639_v88                          | Listeria_monocytogenes_1639_v23 | 0.9222 |
| Listeria_monocytogenes_1639_v87                          | Listeria_monocytogenes_1639_v23 | 0.9303 |
| Listeria_monocytogenes_1639_v86                          | Listeria_monocytogenes_1639_v23 | 0.9295 |
| Listeria_monocytogenes_1639_v85                          | Listeria_monocytogenes_1639_v23 | 0.9701 |
| Listeria_monocytogenes_1639_v84                          | Listeria_monocytogenes_1639_v23 | 0.9298 |
| Listeria_monocytogenes_1639_v83                          | Listeria_monocytogenes_1639_v23 | 0.9815 |
| Listeria_monocytogenes_1639_v82                          | Listeria_monocytogenes_1639_v23 | 0.9807 |
| Listeria_monocytogenes_1639_v81                          | Listeria_monocytogenes_1639_v23 | 0.9255 |
| Listeria_monocytogenes_1639_v80                          | Listeria_monocytogenes_1639_v23 | 0.9476 |

Listeria\_monocytogenes\_1639\_v7  
Listeria\_monocytogenes\_1639\_v79  
Listeria\_monocytogenes\_1639\_v78  
Listeria\_monocytogenes\_1639\_v77  
Listeria\_monocytogenes\_1639\_v76  
Listeria\_monocytogenes\_1639\_v75  
Listeria\_monocytogenes\_1639\_v74  
Listeria\_monocytogenes\_1639\_v73  
Listeria\_monocytogenes\_1639\_v72  
Listeria\_monocytogenes\_1639\_v71  
Listeria\_monocytogenes\_1639\_v70  
Listeria\_monocytogenes\_1639\_v6  
Listeria\_monocytogenes\_1639\_v69  
Listeria\_monocytogenes\_1639\_v68  
Listeria\_monocytogenes\_1639\_v67  
Listeria\_monocytogenes\_1639\_v66  
Listeria\_monocytogenes\_1639\_v65  
Listeria\_monocytogenes\_1639\_v64  
Listeria\_monocytogenes\_1639\_v63  
Listeria\_monocytogenes\_1639\_v62  
Listeria\_monocytogenes\_1639\_v61  
Listeria\_monocytogenes\_1639\_v60  
Listeria\_monocytogenes\_1639\_v5  
Listeria\_monocytogenes\_1639\_v59  
Listeria\_monocytogenes\_1639\_v58  
Listeria\_monocytogenes\_1639\_v57  
Listeria\_monocytogenes\_1639\_v56  
Listeria\_monocytogenes\_1639\_v55  
Listeria\_monocytogenes\_1639\_v54  
Listeria\_monocytogenes\_1639\_v53  
Listeria\_monocytogenes\_1639\_v52  
Listeria\_monocytogenes\_1639\_v51  
Listeria\_monocytogenes\_1639\_v50  
Listeria\_monocytogenes\_1639\_v4  
Listeria\_monocytogenes\_1639\_v49  
Listeria\_monocytogenes\_1639\_v48  
Listeria\_monocytogenes\_1639\_v47  
Listeria\_monocytogenes\_1639\_v46  
Listeria\_monocytogenes\_1639\_v45  
Listeria\_monocytogenes\_1639\_v44  
Listeria\_monocytogenes\_1639\_v43  
Listeria\_monocytogenes\_1639\_v42  
Listeria\_monocytogenes\_1639\_v41  
Listeria\_monocytogenes\_1639\_v40  
Listeria\_monocytogenes\_1639\_v3  
Listeria\_monocytogenes\_1639\_v39  
Listeria\_monocytogenes\_1639\_v38  
Listeria\_monocytogenes\_1639\_v37  
Listeria\_monocytogenes\_1639\_v36  
Listeria\_monocytogenes\_1639\_v35  
Listeria\_monocytogenes\_1639\_v34  
Listeria\_monocytogenes\_1639\_v33  
Listeria\_monocytogenes\_1639\_v32  
Listeria\_monocytogenes\_1639\_v31  
Listeria\_monocytogenes\_1639\_v30  
Listeria\_monocytogenes\_1639\_v2  
Listeria\_monocytogenes\_1639\_v29  
Listeria\_monocytogenes\_1639\_v28  
Listeria\_monocytogenes\_1639\_v27  
Listeria\_monocytogenes\_1639\_v26  
Listeria\_monocytogenes\_1639\_v25  
Listeria\_monocytogenes\_1639\_v24  
Listeria\_monocytogenes\_1639\_v23  
Listeria\_welshimeri\_1643  
Listeria\_welshimeri\_serovar\_6b\_str\_SLCC5334\_386043  
Listeria\_seeligeri\_serovar\_1\_2b\_str\_SLCC3954\_683837  
Listeria\_seeligeri\_FSL\_S4-171\_702452  
Listeria\_seeligeri\_FSL\_N1-067\_702453  
Listeria\_seeligeri\_1640\_v1  
Listeria\_seeligeri\_1640  
Listeria\_monocytogenes\_WSLC1042\_1457188  
Listeria\_monocytogenes\_WSLC1001\_1457187  
Listeria\_monocytogenes\_SLCC7179\_879090  
Listeria\_monocytogenes\_SLCC5850\_882096  
Listeria\_monocytogenes\_SLCC2755\_932919  
Listeria\_monocytogenes\_SLCC2540\_879089  
Listeria\_monocytogenes\_SLCC2479\_882020  
Listeria\_monocytogenes\_SLCC2378\_879088  
Listeria\_monocytogenes\_SLCC2376\_882097  
Listeria\_monocytogenes\_SLCC2372\_932920  
Listeria\_monocytogenes\_serotype\_4b\_str\_LL195\_1230340  
Listeria\_monocytogenes\_serotype\_4b\_str\_LIS0087\_1134669  
Listeria\_monocytogenes\_serotype\_4b\_str\_F2365\_265669  
Listeria\_monocytogenes\_serotype\_4b\_str\_CLIP\_80459\_568819  
Listeria\_monocytogenes\_serotype\_4b\_str\_81-0861\_1196161  
Listeria\_monocytogenes\_serotype\_4b\_str\_81-0592\_1196160  
Listeria\_monocytogenes\_serotype\_4b\_str\_81-0558\_1196159  
Listeria\_monocytogenes\_serotype\_4b\_str\_10-0809\_1196162  
Listeria\_monocytogenes\_serotype\_4b\_str\_02-6680\_1196175  
Listeria\_monocytogenes\_serotype\_4b\_str\_02-6679\_1196174  
Listeria\_monocytogenes\_serotype\_4b\_str\_02-1792\_1196173

Listeria\_monocytogenes\_1639\_v23 0.91  
Listeria\_monocytogenes\_1639\_v23 0.922  
Listeria\_monocytogenes\_1639\_v23 0.9245  
Listeria\_monocytogenes\_1639\_v23 0.9194  
Listeria\_monocytogenes\_1639\_v23 0.9191  
Listeria\_monocytogenes\_1639\_v23 0.9157  
Listeria\_monocytogenes\_1639\_v23 0.9163  
Listeria\_monocytogenes\_1639\_v23 0.9237  
Listeria\_monocytogenes\_1639\_v23 0.9814  
Listeria\_monocytogenes\_1639\_v23 0.9088  
Listeria\_monocytogenes\_1639\_v23 0.9187  
Listeria\_monocytogenes\_1639\_v23 0.9094  
Listeria\_monocytogenes\_1639\_v23 0.967  
Listeria\_monocytogenes\_1639\_v23 0.9355  
Listeria\_monocytogenes\_1639\_v23 0.9378  
Listeria\_monocytogenes\_1639\_v23 0.9236  
Listeria\_monocytogenes\_1639\_v23 0.9286  
Listeria\_monocytogenes\_1639\_v23 0.9208  
Listeria\_monocytogenes\_1639\_v23 0.9374  
Listeria\_monocytogenes\_1639\_v23 0.9203  
Listeria\_monocytogenes\_1639\_v23 0.9219  
Listeria\_monocytogenes\_1639\_v23 0.9196  
Listeria\_monocytogenes\_1639\_v23 0.9054  
Listeria\_monocytogenes\_1639\_v23 0.9874  
Listeria\_monocytogenes\_1639\_v23 0.9737  
Listeria\_monocytogenes\_1639\_v23 0.9391  
Listeria\_monocytogenes\_1639\_v23 0.9752  
Listeria\_monocytogenes\_1639\_v23 0.9415  
Listeria\_monocytogenes\_1639\_v23 0.9123  
Listeria\_monocytogenes\_1639\_v23 0.9148  
Listeria\_monocytogenes\_1639\_v23 0.9863  
Listeria\_monocytogenes\_1639\_v23 0.9794  
Listeria\_monocytogenes\_1639\_v23 0.9178  
Listeria\_monocytogenes\_1639\_v23 0.9177  
Listeria\_monocytogenes\_1639\_v23 0.9571  
Listeria\_monocytogenes\_1639\_v23 0.9185  
Listeria\_monocytogenes\_1639\_v23 0.9182  
Listeria\_monocytogenes\_1639\_v23 0.9259  
Listeria\_monocytogenes\_1639\_v23 0.9096  
Listeria\_monocytogenes\_1639\_v23 0.9185  
Listeria\_monocytogenes\_1639\_v23 0.9185  
Listeria\_monocytogenes\_1639\_v23 0.908  
Listeria\_monocytogenes\_1639\_v23 0.9058  
Listeria\_monocytogenes\_1639\_v23 0.9166  
Listeria\_monocytogenes\_1639\_v23 0.918  
Listeria\_monocytogenes\_1639\_v23 0.9392  
Listeria\_monocytogenes\_1639\_v23 0.9202  
Listeria\_monocytogenes\_1639\_v23 0.907  
Listeria\_monocytogenes\_1639\_v23 0.9083  
Listeria\_monocytogenes\_1639\_v23 0.9154  
Listeria\_monocytogenes\_1639\_v23 0.9294  
Listeria\_monocytogenes\_1639\_v23 0.9444  
Listeria\_monocytogenes\_1639\_v23 0.9203  
Listeria\_monocytogenes\_1639\_v23 0.9298  
Listeria\_monocytogenes\_1639\_v23 0.9292  
Listeria\_monocytogenes\_1639\_v23 0.9011  
Listeria\_monocytogenes\_1639\_v23 0.9116  
Listeria\_monocytogenes\_1639\_v23 0.9137  
Listeria\_monocytogenes\_1639\_v23 0.9117  
Listeria\_monocytogenes\_1639\_v23 0.9128  
Listeria\_monocytogenes\_1639\_v23 0.9128  
Listeria\_monocytogenes\_1639\_v23 0.9993  
Listeria\_monocytogenes\_1639\_v23 0.0712  
Listeria\_monocytogenes\_1639\_v24 0.8821  
Listeria\_monocytogenes\_1639\_v24 0.8817  
Listeria\_monocytogenes\_1639\_v24 0.8705  
Listeria\_monocytogenes\_1639\_v24 0.8185  
Listeria\_monocytogenes\_1639\_v24 0.826  
Listeria\_monocytogenes\_1639\_v24 0.8758  
Listeria\_monocytogenes\_1639\_v24 0.8753  
Listeria\_monocytogenes\_1639\_v24 0.9604  
Listeria\_monocytogenes\_1639\_v24 0.9252  
Listeria\_monocytogenes\_1639\_v24 0.9298  
Listeria\_monocytogenes\_1639\_v24 0.9283  
Listeria\_monocytogenes\_1639\_v24 0.9274  
Listeria\_monocytogenes\_1639\_v24 0.9408  
Listeria\_monocytogenes\_1639\_v24 0.9213  
Listeria\_monocytogenes\_1639\_v24 0.9615  
Listeria\_monocytogenes\_1639\_v24 0.922  
Listeria\_monocytogenes\_1639\_v24 0.9146  
Listeria\_monocytogenes\_1639\_v24 0.9567  
Listeria\_monocytogenes\_1639\_v24 0.9129  
Listeria\_monocytogenes\_1639\_v24 0.9567  
Listeria\_monocytogenes\_1639\_v24 0.9525  
Listeria\_monocytogenes\_1639\_v24 0.9663  
Listeria\_monocytogenes\_1639\_v24 0.9674  
Listeria\_monocytogenes\_1639\_v24 0.9667  
Listeria\_monocytogenes\_1639\_v24 0.9674  
Listeria\_monocytogenes\_1639\_v24 0.9586  
Listeria\_monocytogenes\_1639\_v24 0.9586  
Listeria\_monocytogenes\_1639\_v24 0.9693



|                                                          |                                 |        |
|----------------------------------------------------------|---------------------------------|--------|
| Listeria_monocytogenes_serotype_4b_str_02-1289_1196172   | Listeria_monocytogenes_1639_v24 | 0.9693 |
| Listeria_monocytogenes_serotype_4b_str_02-1103_1196171   | Listeria_monocytogenes_1639_v24 | 0.9693 |
| Listeria_monocytogenes_serotype_3c_str_10-5027_1196195   | Listeria_monocytogenes_1639_v24 | 0.9231 |
| Listeria_monocytogenes_serotype_1_2c_str_10-5026_1196194 | Listeria_monocytogenes_1639_v24 | 0.9235 |
| Listeria_monocytogenes_serotype_1_2c_str_10-5025_1196193 | Listeria_monocytogenes_1639_v24 | 0.9235 |
| Listeria_monocytogenes_serotype_1_2b_str_10-0811_1196164 | Listeria_monocytogenes_1639_v24 | 0.9452 |
| Listeria_monocytogenes_serotype_1_2b_str_10-0810_1196163 | Listeria_monocytogenes_1639_v24 | 0.9452 |
| Listeria_monocytogenes_serotype_1_2a_str_99-6370_1196179 | Listeria_monocytogenes_1639_v24 | 0.9143 |
| Listeria_monocytogenes_serotype_1_2a_str_98-2035_1196178 | Listeria_monocytogenes_1639_v24 | 0.9143 |
| Listeria_monocytogenes_serotype_1_2a_str_95-0093_1196177 | Listeria_monocytogenes_1639_v24 | 0.9185 |
| Listeria_monocytogenes_serotype_1_2a_str_88-0478_1196176 | Listeria_monocytogenes_1639_v24 | 0.9174 |
| Listeria_monocytogenes_serotype_1_2a_str_10-5024_1196192 | Listeria_monocytogenes_1639_v24 | 0.9185 |
| Listeria_monocytogenes_serotype_1_2a_str_10-4758_1196168 | Listeria_monocytogenes_1639_v24 | 0.9302 |
| Listeria_monocytogenes_serotype_1_2a_str_10-4754_1196167 | Listeria_monocytogenes_1639_v24 | 0.9306 |
| Listeria_monocytogenes_serotype_1_2a_str_10-1321_1196191 | Listeria_monocytogenes_1639_v24 | 0.9185 |
| Listeria_monocytogenes_serotype_1_2a_str_10-1047_1196190 | Listeria_monocytogenes_1639_v24 | 0.9184 |
| Listeria_monocytogenes_serotype_1_2a_str_10-1046_1196189 | Listeria_monocytogenes_1639_v24 | 0.9184 |
| Listeria_monocytogenes_serotype_1_2a_str_10-0934_1196170 | Listeria_monocytogenes_1639_v24 | 0.927  |
| Listeria_monocytogenes_serotype_1_2a_str_10-0933_1196169 | Listeria_monocytogenes_1639_v24 | 0.927  |
| Listeria_monocytogenes_serotype_1_2a_str_10-0815_1196188 | Listeria_monocytogenes_1639_v24 | 0.9145 |
| Listeria_monocytogenes_serotype_1_2a_str_10-0814_1196187 | Listeria_monocytogenes_1639_v24 | 0.9189 |
| Listeria_monocytogenes_serotype_1_2a_str_10-0813_1196166 | Listeria_monocytogenes_1639_v24 | 0.9306 |
| Listeria_monocytogenes_serotype_1_2a_str_10-0812_1196165 | Listeria_monocytogenes_1639_v24 | 0.9306 |
| Listeria_monocytogenes_serotype_1_2a_str_08-7669_1196186 | Listeria_monocytogenes_1639_v24 | 0.9191 |
| Listeria_monocytogenes_serotype_1_2a_str_08-7374_1196185 | Listeria_monocytogenes_1639_v24 | 0.9185 |
| Listeria_monocytogenes_serotype_1_2a_str_08-6997_1196184 | Listeria_monocytogenes_1639_v24 | 0.9145 |
| Listeria_monocytogenes_serotype_1_2a_str_08-6569_1196183 | Listeria_monocytogenes_1639_v24 | 0.9145 |
| Listeria_monocytogenes_serotype_1_2a_str_08-6056_1196182 | Listeria_monocytogenes_1639_v24 | 0.9145 |
| Listeria_monocytogenes_serotype_1_2a_str_04-5457_1196181 | Listeria_monocytogenes_1639_v24 | 0.9185 |
| Listeria_monocytogenes_serotype_1_2a_str_02-5993_1196180 | Listeria_monocytogenes_1639_v24 | 0.9185 |
| Listeria_monocytogenes_R479a_1437838                     | Listeria_monocytogenes_1639_v24 | 0.9164 |
| Listeria_monocytogenes_N53-1_1234142                     | Listeria_monocytogenes_1639_v24 | 0.8807 |
| Listeria_monocytogenes_M7_1030009                        | Listeria_monocytogenes_1639_v24 | 0.9157 |
| Listeria_monocytogenes_LO28_393132                       | Listeria_monocytogenes_1639_v24 | 0.9266 |
| Listeria_monocytogenes_L99_563174                        | Listeria_monocytogenes_1639_v24 | 0.916  |
| Listeria_monocytogenes_L312_882094                       | Listeria_monocytogenes_1639_v24 | 0.9529 |
| Listeria_monocytogenes_J1816_930781                      | Listeria_monocytogenes_1639_v24 | 0.9399 |
| Listeria_monocytogenes_J1-220_930782                     | Listeria_monocytogenes_1639_v24 | 0.9923 |
| Listeria_monocytogenes_J0161_393130                      | Listeria_monocytogenes_1639_v24 | 0.9273 |
| Listeria_monocytogenes_HCC23_552536                      | Listeria_monocytogenes_1639_v24 | 0.9153 |
| Listeria_monocytogenes_FSL_R2-561_393126                 | Listeria_monocytogenes_1639_v24 | 0.9217 |
| Listeria_monocytogenes_FSL_J1-208_393119                 | Listeria_monocytogenes_1639_v24 | 0.9035 |
| Listeria_monocytogenes_FSL_J1-175_393118                 | Listeria_monocytogenes_1639_v24 | 0.9481 |
| Listeria_monocytogenes_Finland_1998_393127               | Listeria_monocytogenes_1639_v24 | 0.9278 |
| Listeria_monocytogenes_EGD-e_169963_v1                   | Listeria_monocytogenes_1639_v24 | 0.9307 |
| Listeria_monocytogenes_EGD-e_169963                      | Listeria_monocytogenes_1639_v24 | 0.931  |
| Listeria_monocytogenes_EGD_1334565                       | Listeria_monocytogenes_1639_v24 | 0.929  |
| Listeria_monocytogenes_CFSAN002349_1299895               | Listeria_monocytogenes_1639_v24 | 0.9523 |
| Listeria_monocytogenes_ATCC_19117_882095_v1              | Listeria_monocytogenes_1639_v24 | 0.979  |
| Listeria_monocytogenes_ATCC_19117_882095                 | Listeria_monocytogenes_1639_v24 | 0.9786 |
| Listeria_monocytogenes_6179_1288295                      | Listeria_monocytogenes_1639_v24 | 0.9181 |
| Listeria_monocytogenes_1639_v9                           | Listeria_monocytogenes_1639_v24 | 0.9314 |
| Listeria_monocytogenes_1639_v99                          | Listeria_monocytogenes_1639_v24 | 0.941  |
| Listeria_monocytogenes_1639_v98                          | Listeria_monocytogenes_1639_v24 | 0.9243 |
| Listeria_monocytogenes_1639_v97                          | Listeria_monocytogenes_1639_v24 | 0.9554 |
| Listeria_monocytogenes_1639_v96                          | Listeria_monocytogenes_1639_v24 | 0.94   |
| Listeria_monocytogenes_1639_v95                          | Listeria_monocytogenes_1639_v24 | 0.94   |
| Listeria_monocytogenes_1639_v94                          | Listeria_monocytogenes_1639_v24 | 0.9403 |
| Listeria_monocytogenes_1639_v93                          | Listeria_monocytogenes_1639_v24 | 0.9148 |
| Listeria_monocytogenes_1639_v92                          | Listeria_monocytogenes_1639_v24 | 0.9414 |
| Listeria_monocytogenes_1639_v91                          | Listeria_monocytogenes_1639_v24 | 0.9705 |
| Listeria_monocytogenes_1639_v90                          | Listeria_monocytogenes_1639_v24 | 0.9243 |
| Listeria_monocytogenes_1639_v8                           | Listeria_monocytogenes_1639_v24 | 0.91   |
| Listeria_monocytogenes_1639_v89                          | Listeria_monocytogenes_1639_v24 | 0.9627 |
| Listeria_monocytogenes_1639_v88                          | Listeria_monocytogenes_1639_v24 | 0.9222 |
| Listeria_monocytogenes_1639_v87                          | Listeria_monocytogenes_1639_v24 | 0.9306 |
| Listeria_monocytogenes_1639_v86                          | Listeria_monocytogenes_1639_v24 | 0.9303 |
| Listeria_monocytogenes_1639_v85                          | Listeria_monocytogenes_1639_v24 | 0.9708 |
| Listeria_monocytogenes_1639_v84                          | Listeria_monocytogenes_1639_v24 | 0.9298 |
| Listeria_monocytogenes_1639_v83                          | Listeria_monocytogenes_1639_v24 | 0.9822 |
| Listeria_monocytogenes_1639_v82                          | Listeria_monocytogenes_1639_v24 | 0.9815 |
| Listeria_monocytogenes_1639_v81                          | Listeria_monocytogenes_1639_v24 | 0.9255 |
| Listeria_monocytogenes_1639_v80                          | Listeria_monocytogenes_1639_v24 | 0.948  |
| Listeria_monocytogenes_1639_v7                           | Listeria_monocytogenes_1639_v24 | 0.91   |
| Listeria_monocytogenes_1639_v79                          | Listeria_monocytogenes_1639_v24 | 0.9223 |
| Listeria_monocytogenes_1639_v78                          | Listeria_monocytogenes_1639_v24 | 0.9245 |
| Listeria_monocytogenes_1639_v77                          | Listeria_monocytogenes_1639_v24 | 0.9197 |
| Listeria_monocytogenes_1639_v76                          | Listeria_monocytogenes_1639_v24 | 0.9195 |
| Listeria_monocytogenes_1639_v75                          | Listeria_monocytogenes_1639_v24 | 0.916  |
| Listeria_monocytogenes_1639_v74                          | Listeria_monocytogenes_1639_v24 | 0.917  |
| Listeria_monocytogenes_1639_v73                          | Listeria_monocytogenes_1639_v24 | 0.9244 |
| Listeria_monocytogenes_1639_v72                          | Listeria_monocytogenes_1639_v24 | 0.9818 |
| Listeria_monocytogenes_1639_v71                          | Listeria_monocytogenes_1639_v24 | 0.9092 |
| Listeria_monocytogenes_1639_v70                          | Listeria_monocytogenes_1639_v24 | 0.9187 |
| Listeria_monocytogenes_1639_v6                           | Listeria_monocytogenes_1639_v24 | 0.9097 |
| Listeria_monocytogenes_1639_v69                          | Listeria_monocytogenes_1639_v24 | 0.9674 |
| Listeria_monocytogenes_1639_v68                          | Listeria_monocytogenes_1639_v24 | 0.9359 |
| Listeria_monocytogenes_1639_v67                          | Listeria_monocytogenes_1639_v24 | 0.9378 |
| Listeria_monocytogenes_1639_v66                          | Listeria_monocytogenes_1639_v24 | 0.9236 |
| Listeria_monocytogenes_1639_v65                          | Listeria_monocytogenes_1639_v24 | 0.9289 |
| Listeria_monocytogenes_1639_v64                          | Listeria_monocytogenes_1639_v24 | 0.9208 |

|                                                          |                                 |        |
|----------------------------------------------------------|---------------------------------|--------|
| Listeria_monocytogenes_1639_v63                          | Listeria_monocytogenes_1639_v24 | 0.9377 |
| Listeria_monocytogenes_1639_v62                          | Listeria_monocytogenes_1639_v24 | 0.9203 |
| Listeria_monocytogenes_1639_v61                          | Listeria_monocytogenes_1639_v24 | 0.9219 |
| Listeria_monocytogenes_1639_v60                          | Listeria_monocytogenes_1639_v24 | 0.9196 |
| Listeria_monocytogenes_1639_v5                           | Listeria_monocytogenes_1639_v24 | 0.9057 |
| Listeria_monocytogenes_1639_v59                          | Listeria_monocytogenes_1639_v24 | 0.9874 |
| Listeria_monocytogenes_1639_v58                          | Listeria_monocytogenes_1639_v24 | 0.9744 |
| Listeria_monocytogenes_1639_v57                          | Listeria_monocytogenes_1639_v24 | 0.9391 |
| Listeria_monocytogenes_1639_v56                          | Listeria_monocytogenes_1639_v24 | 0.9755 |
| Listeria_monocytogenes_1639_v55                          | Listeria_monocytogenes_1639_v24 | 0.9419 |
| Listeria_monocytogenes_1639_v54                          | Listeria_monocytogenes_1639_v24 | 0.9126 |
| Listeria_monocytogenes_1639_v53                          | Listeria_monocytogenes_1639_v24 | 0.9151 |
| Listeria_monocytogenes_1639_v52                          | Listeria_monocytogenes_1639_v24 | 0.9871 |
| Listeria_monocytogenes_1639_v51                          | Listeria_monocytogenes_1639_v24 | 0.9797 |
| Listeria_monocytogenes_1639_v50                          | Listeria_monocytogenes_1639_v24 | 0.9178 |
| Listeria_monocytogenes_1639_v4                           | Listeria_monocytogenes_1639_v24 | 0.9183 |
| Listeria_monocytogenes_1639_v49                          | Listeria_monocytogenes_1639_v24 | 0.9571 |
| Listeria_monocytogenes_1639_v48                          | Listeria_monocytogenes_1639_v24 | 0.9188 |
| Listeria_monocytogenes_1639_v47                          | Listeria_monocytogenes_1639_v24 | 0.9182 |
| Listeria_monocytogenes_1639_v46                          | Listeria_monocytogenes_1639_v24 | 0.9259 |
| Listeria_monocytogenes_1639_v45                          | Listeria_monocytogenes_1639_v24 | 0.9099 |
| Listeria_monocytogenes_1639_v44                          | Listeria_monocytogenes_1639_v24 | 0.9185 |
| Listeria_monocytogenes_1639_v43                          | Listeria_monocytogenes_1639_v24 | 0.9185 |
| Listeria_monocytogenes_1639_v42                          | Listeria_monocytogenes_1639_v24 | 0.9084 |
| Listeria_monocytogenes_1639_v41                          | Listeria_monocytogenes_1639_v24 | 0.9062 |
| Listeria_monocytogenes_1639_v40                          | Listeria_monocytogenes_1639_v24 | 0.9169 |
| Listeria_monocytogenes_1639_v3                           | Listeria_monocytogenes_1639_v24 | 0.9187 |
| Listeria_monocytogenes_1639_v39                          | Listeria_monocytogenes_1639_v24 | 0.9395 |
| Listeria_monocytogenes_1639_v38                          | Listeria_monocytogenes_1639_v24 | 0.9205 |
| Listeria_monocytogenes_1639_v37                          | Listeria_monocytogenes_1639_v24 | 0.907  |
| Listeria_monocytogenes_1639_v36                          | Listeria_monocytogenes_1639_v24 | 0.9086 |
| Listeria_monocytogenes_1639_v35                          | Listeria_monocytogenes_1639_v24 | 0.9157 |
| Listeria_monocytogenes_1639_v34                          | Listeria_monocytogenes_1639_v24 | 0.9294 |
| Listeria_monocytogenes_1639_v33                          | Listeria_monocytogenes_1639_v24 | 0.9452 |
| Listeria_monocytogenes_1639_v32                          | Listeria_monocytogenes_1639_v24 | 0.9207 |
| Listeria_monocytogenes_1639_v31                          | Listeria_monocytogenes_1639_v24 | 0.9298 |
| Listeria_monocytogenes_1639_v30                          | Listeria_monocytogenes_1639_v24 | 0.9289 |
| Listeria_monocytogenes_1639_v2                           | Listeria_monocytogenes_1639_v24 | 0.9015 |
| Listeria_monocytogenes_1639_v29                          | Listeria_monocytogenes_1639_v24 | 0.9119 |
| Listeria_monocytogenes_1639_v28                          | Listeria_monocytogenes_1639_v24 | 0.914  |
| Listeria_monocytogenes_1639_v27                          | Listeria_monocytogenes_1639_v24 | 0.9124 |
| Listeria_monocytogenes_1639_v26                          | Listeria_monocytogenes_1639_v24 | 0.9132 |
| Listeria_monocytogenes_1639_v25                          | Listeria_monocytogenes_1639_v24 | 0.9135 |
| Listeria_monocytogenes_1639_v24                          | Listeria_monocytogenes_1639_v24 | 0.0713 |
| Listeria_welshimeri_1643                                 | Listeria_monocytogenes_1639_v25 | 0.8524 |
| Listeria_welshimeri_serovar_6b_str_SLCC5334_386043       | Listeria_monocytogenes_1639_v25 | 0.8521 |
| Listeria_seeligeri_serovar_1_2b_str_SLCC3954_683837      | Listeria_monocytogenes_1639_v25 | 0.8564 |
| Listeria_seeligeri_FSL_S4-171_702452                     | Listeria_monocytogenes_1639_v25 | 0.797  |
| Listeria_seeligeri_FSL_N1-067_702453                     | Listeria_monocytogenes_1639_v25 | 0.8209 |
| Listeria_seeligeri_1640_v1                               | Listeria_monocytogenes_1639_v25 | 0.8622 |
| Listeria_seeligeri_1640                                  | Listeria_monocytogenes_1639_v25 | 0.8581 |
| Listeria_monocytogenes_WSLC1042_1457188                  | Listeria_monocytogenes_1639_v25 | 0.9066 |
| Listeria_monocytogenes_WSLC1001_1457187                  | Listeria_monocytogenes_1639_v25 | 0.9396 |
| Listeria_monocytogenes_SLCC7179_879090                   | Listeria_monocytogenes_1639_v25 | 0.9353 |
| Listeria_monocytogenes_SLCC5850_882096                   | Listeria_monocytogenes_1639_v25 | 0.936  |
| Listeria_monocytogenes_SLCC2755_932919                   | Listeria_monocytogenes_1639_v25 | 0.938  |
| Listeria_monocytogenes_SLCC2540_879089                   | Listeria_monocytogenes_1639_v25 | 0.9245 |
| Listeria_monocytogenes_SLCC2479_882020                   | Listeria_monocytogenes_1639_v25 | 0.9636 |
| Listeria_monocytogenes_SLCC2378_879088                   | Listeria_monocytogenes_1639_v25 | 0.9076 |
| Listeria_monocytogenes_SLCC2376_882097                   | Listeria_monocytogenes_1639_v25 | 0.9123 |
| Listeria_monocytogenes_SLCC2372_932920                   | Listeria_monocytogenes_1639_v25 | 0.9718 |
| Listeria_monocytogenes_serotype_4b_str_LL195_1230340     | Listeria_monocytogenes_1639_v25 | 0.9114 |
| Listeria_monocytogenes_serotype_4b_str_LIS0087_1134669   | Listeria_monocytogenes_1639_v25 | 0.9232 |
| Listeria_monocytogenes_serotype_4b_str_F2365_265669      | Listeria_monocytogenes_1639_v25 | 0.9114 |
| Listeria_monocytogenes_serotype_4b_str_CLIP_80459_568819 | Listeria_monocytogenes_1639_v25 | 0.9139 |
| Listeria_monocytogenes_serotype_4b_str_81-0861_1196161   | Listeria_monocytogenes_1639_v25 | 0.9097 |
| Listeria_monocytogenes_serotype_4b_str_81-0592_1196160   | Listeria_monocytogenes_1639_v25 | 0.9107 |
| Listeria_monocytogenes_serotype_4b_str_81-0558_1196159   | Listeria_monocytogenes_1639_v25 | 0.911  |
| Listeria_monocytogenes_serotype_4b_str_10-0809_1196162   | Listeria_monocytogenes_1639_v25 | 0.9107 |
| Listeria_monocytogenes_serotype_4b_str_02-6680_1196175   | Listeria_monocytogenes_1639_v25 | 0.9115 |
| Listeria_monocytogenes_serotype_4b_str_02-6679_1196174   | Listeria_monocytogenes_1639_v25 | 0.9115 |
| Listeria_monocytogenes_serotype_4b_str_02-1792_1196173   | Listeria_monocytogenes_1639_v25 | 0.9118 |
| Listeria_monocytogenes_serotype_4b_str_02-1289_1196172   | Listeria_monocytogenes_1639_v25 | 0.9118 |
| Listeria_monocytogenes_serotype_4b_str_02-1103_1196171   | Listeria_monocytogenes_1639_v25 | 0.9118 |
| Listeria_monocytogenes_serotype_3c_str_10-5027_1196195   | Listeria_monocytogenes_1639_v25 | 0.9647 |
| Listeria_monocytogenes_serotype_1_2c_str_10-5026_1196194 | Listeria_monocytogenes_1639_v25 | 0.9654 |
| Listeria_monocytogenes_serotype_1_2c_str_10-5025_1196193 | Listeria_monocytogenes_1639_v25 | 0.9654 |
| Listeria_monocytogenes_serotype_1_2b_str_10-0811_1196164 | Listeria_monocytogenes_1639_v25 | 0.93   |
| Listeria_monocytogenes_serotype_1_2b_str_10-0810_1196163 | Listeria_monocytogenes_1639_v25 | 0.93   |
| Listeria_monocytogenes_serotype_1_2a_str_99-6370_1196179 | Listeria_monocytogenes_1639_v25 | 0.926  |
| Listeria_monocytogenes_serotype_1_2a_str_98-2035_1196178 | Listeria_monocytogenes_1639_v25 | 0.926  |
| Listeria_monocytogenes_serotype_1_2a_str_95-0093_1196177 | Listeria_monocytogenes_1639_v25 | 0.9299 |
| Listeria_monocytogenes_serotype_1_2a_str_88-0478_1196176 | Listeria_monocytogenes_1639_v25 | 0.9316 |
| Listeria_monocytogenes_serotype_1_2a_str_10-5024_1196192 | Listeria_monocytogenes_1639_v25 | 0.9306 |
| Listeria_monocytogenes_serotype_1_2a_str_10-4758_1196168 | Listeria_monocytogenes_1639_v25 | 0.9386 |
| Listeria_monocytogenes_serotype_1_2a_str_10-4754_1196167 | Listeria_monocytogenes_1639_v25 | 0.939  |
| Listeria_monocytogenes_serotype_1_2a_str_10-1321_1196191 | Listeria_monocytogenes_1639_v25 | 0.9306 |
| Listeria_monocytogenes_serotype_1_2a_str_10-1047_1196190 | Listeria_monocytogenes_1639_v25 | 0.9302 |
| Listeria_monocytogenes_serotype_1_2a_str_10-1046_1196189 | Listeria_monocytogenes_1639_v25 | 0.9302 |
| Listeria_monocytogenes_serotype_1_2a_str_10-0934_1196170 | Listeria_monocytogenes_1639_v25 | 0.936  |
| Listeria_monocytogenes_serotype_1_2a_str_10-0933_1196169 | Listeria_monocytogenes_1639_v25 | 0.936  |

|                                                          |                                 |        |
|----------------------------------------------------------|---------------------------------|--------|
| Listeria_monocytogenes_serotype_1_2a_str_10-0815_1196188 | Listeria_monocytogenes_1639_v25 | 0.927  |
| Listeria_monocytogenes_serotype_1_2a_str_10-0814_1196187 | Listeria_monocytogenes_1639_v25 | 0.9309 |
| Listeria_monocytogenes_serotype_1_2a_str_10-0813_1196166 | Listeria_monocytogenes_1639_v25 | 0.9419 |
| Listeria_monocytogenes_serotype_1_2a_str_10-0812_1196165 | Listeria_monocytogenes_1639_v25 | 0.9419 |
| Listeria_monocytogenes_serotype_1_2a_str_08-7669_1196186 | Listeria_monocytogenes_1639_v25 | 0.924  |
| Listeria_monocytogenes_serotype_1_2a_str_08-7374_1196185 | Listeria_monocytogenes_1639_v25 | 0.9306 |
| Listeria_monocytogenes_serotype_1_2a_str_08-6997_1196184 | Listeria_monocytogenes_1639_v25 | 0.927  |
| Listeria_monocytogenes_serotype_1_2a_str_08-6569_1196183 | Listeria_monocytogenes_1639_v25 | 0.927  |
| Listeria_monocytogenes_serotype_1_2a_str_08-6056_1196182 | Listeria_monocytogenes_1639_v25 | 0.927  |
| Listeria_monocytogenes_serotype_1_2a_str_04-5457_1196181 | Listeria_monocytogenes_1639_v25 | 0.9306 |
| Listeria_monocytogenes_serotype_1_2a_str_02-5993_1196180 | Listeria_monocytogenes_1639_v25 | 0.9306 |
| Listeria_monocytogenes_R479a_1437838                     | Listeria_monocytogenes_1639_v25 | 0.9371 |
| Listeria_monocytogenes_N53-1_1234142                     | Listeria_monocytogenes_1639_v25 | 0.8917 |
| Listeria_monocytogenes_M7_1030009                        | Listeria_monocytogenes_1639_v25 | 0.9011 |
| Listeria_monocytogenes_LO28_393132                       | Listeria_monocytogenes_1639_v25 | 0.9698 |
| Listeria_monocytogenes_L99_563174                        | Listeria_monocytogenes_1639_v25 | 0.9014 |
| Listeria_monocytogenes_L312_882094                       | Listeria_monocytogenes_1639_v25 | 0.9139 |
| Listeria_monocytogenes_J1816_930781                      | Listeria_monocytogenes_1639_v25 | 0.9031 |
| Listeria_monocytogenes_J1-220_930782                     | Listeria_monocytogenes_1639_v25 | 0.9143 |
| Listeria_monocytogenes_J0161_393130                      | Listeria_monocytogenes_1639_v25 | 0.9284 |
| Listeria_monocytogenes_HCC23_552536                      | Listeria_monocytogenes_1639_v25 | 0.9007 |
| Listeria_monocytogenes_FSL_R2-561_393126                 | Listeria_monocytogenes_1639_v25 | 0.9607 |
| Listeria_monocytogenes_FSL_J1-208_393119                 | Listeria_monocytogenes_1639_v25 | 0.8789 |
| Listeria_monocytogenes_FSL_J1-175_393118                 | Listeria_monocytogenes_1639_v25 | 0.9246 |
| Listeria_monocytogenes_Finland_1998_393127               | Listeria_monocytogenes_1639_v25 | 0.93   |
| Listeria_monocytogenes_EGD-e_169963_v1                   | Listeria_monocytogenes_1639_v25 | 0.9549 |
| Listeria_monocytogenes_EGD-e_169963                      | Listeria_monocytogenes_1639_v25 | 0.9552 |
| Listeria_monocytogenes_EGD_1334565                       | Listeria_monocytogenes_1639_v25 | 0.9367 |
| Listeria_monocytogenes_CFSAN002349_1299895               | Listeria_monocytogenes_1639_v25 | 0.9146 |
| Listeria_monocytogenes_ATCC_19117_882095_v1              | Listeria_monocytogenes_1639_v25 | 0.9088 |
| Listeria_monocytogenes_ATCC_19117_882095                 | Listeria_monocytogenes_1639_v25 | 0.9084 |
| Listeria_monocytogenes_6179_1288295                      | Listeria_monocytogenes_1639_v25 | 0.9387 |
| Listeria_monocytogenes_1639_v9                           | Listeria_monocytogenes_1639_v25 | 0.916  |
| Listeria_monocytogenes_1639_v99                          | Listeria_monocytogenes_1639_v25 | 0.9122 |
| Listeria_monocytogenes_1639_v98                          | Listeria_monocytogenes_1639_v25 | 0.9298 |
| Listeria_monocytogenes_1639_v97                          | Listeria_monocytogenes_1639_v25 | 0.906  |
| Listeria_monocytogenes_1639_v96                          | Listeria_monocytogenes_1639_v25 | 0.9126 |
| Listeria_monocytogenes_1639_v95                          | Listeria_monocytogenes_1639_v25 | 0.9126 |
| Listeria_monocytogenes_1639_v94                          | Listeria_monocytogenes_1639_v25 | 0.9129 |
| Listeria_monocytogenes_1639_v93                          | Listeria_monocytogenes_1639_v25 | 0.9356 |
| Listeria_monocytogenes_1639_v92                          | Listeria_monocytogenes_1639_v25 | 0.9118 |
| Listeria_monocytogenes_1639_v91                          | Listeria_monocytogenes_1639_v25 | 0.9175 |
| Listeria_monocytogenes_1639_v90                          | Listeria_monocytogenes_1639_v25 | 0.9298 |
| Listeria_monocytogenes_1639_v8                           | Listeria_monocytogenes_1639_v25 | 0.9468 |
| Listeria_monocytogenes_1639_v89                          | Listeria_monocytogenes_1639_v25 | 0.9166 |
| Listeria_monocytogenes_1639_v88                          | Listeria_monocytogenes_1639_v25 | 0.9358 |
| Listeria_monocytogenes_1639_v87                          | Listeria_monocytogenes_1639_v25 | 0.9422 |
| Listeria_monocytogenes_1639_v86                          | Listeria_monocytogenes_1639_v25 | 0.9419 |
| Listeria_monocytogenes_1639_v85                          | Listeria_monocytogenes_1639_v25 | 0.909  |
| Listeria_monocytogenes_1639_v84                          | Listeria_monocytogenes_1639_v25 | 0.936  |
| Listeria_monocytogenes_1639_v83                          | Listeria_monocytogenes_1639_v25 | 0.9109 |
| Listeria_monocytogenes_1639_v82                          | Listeria_monocytogenes_1639_v25 | 0.9106 |
| Listeria_monocytogenes_1639_v81                          | Listeria_monocytogenes_1639_v25 | 0.9362 |
| Listeria_monocytogenes_1639_v80                          | Listeria_monocytogenes_1639_v25 | 0.9283 |
| Listeria_monocytogenes_1639_v7                           | Listeria_monocytogenes_1639_v25 | 0.9468 |
| Listeria_monocytogenes_1639_v79                          | Listeria_monocytogenes_1639_v25 | 0.9315 |
| Listeria_monocytogenes_1639_v78                          | Listeria_monocytogenes_1639_v25 | 0.9347 |
| Listeria_monocytogenes_1639_v77                          | Listeria_monocytogenes_1639_v25 | 0.9239 |
| Listeria_monocytogenes_1639_v76                          | Listeria_monocytogenes_1639_v25 | 0.9276 |
| Listeria_monocytogenes_1639_v75                          | Listeria_monocytogenes_1639_v25 | 0.9014 |
| Listeria_monocytogenes_1639_v74                          | Listeria_monocytogenes_1639_v25 | 0.9346 |
| Listeria_monocytogenes_1639_v73                          | Listeria_monocytogenes_1639_v25 | 0.983  |
| Listeria_monocytogenes_1639_v72                          | Listeria_monocytogenes_1639_v25 | 0.9079 |
| Listeria_monocytogenes_1639_v71                          | Listeria_monocytogenes_1639_v25 | 0.921  |
| Listeria_monocytogenes_1639_v70                          | Listeria_monocytogenes_1639_v25 | 0.9696 |
| Listeria_monocytogenes_1639_v6                           | Listeria_monocytogenes_1639_v25 | 0.9464 |
| Listeria_monocytogenes_1639_v69                          | Listeria_monocytogenes_1639_v25 | 0.9107 |
| Listeria_monocytogenes_1639_v68                          | Listeria_monocytogenes_1639_v25 | 0.9332 |
| Listeria_monocytogenes_1639_v67                          | Listeria_monocytogenes_1639_v25 | 0.9197 |
| Listeria_monocytogenes_1639_v66                          | Listeria_monocytogenes_1639_v25 | 0.9387 |
| Listeria_monocytogenes_1639_v65                          | Listeria_monocytogenes_1639_v25 | 0.9423 |
| Listeria_monocytogenes_1639_v64                          | Listeria_monocytogenes_1639_v25 | 0.9337 |
| Listeria_monocytogenes_1639_v63                          | Listeria_monocytogenes_1639_v25 | 0.9296 |
| Listeria_monocytogenes_1639_v62                          | Listeria_monocytogenes_1639_v25 | 0.9306 |
| Listeria_monocytogenes_1639_v61                          | Listeria_monocytogenes_1639_v25 | 0.9314 |
| Listeria_monocytogenes_1639_v60                          | Listeria_monocytogenes_1639_v25 | 0.923  |
| Listeria_monocytogenes_1639_v5                           | Listeria_monocytogenes_1639_v25 | 0.9204 |
| Listeria_monocytogenes_1639_v59                          | Listeria_monocytogenes_1639_v25 | 0.9094 |
| Listeria_monocytogenes_1639_v58                          | Listeria_monocytogenes_1639_v25 | 0.9134 |
| Listeria_monocytogenes_1639_v57                          | Listeria_monocytogenes_1639_v25 | 0.8999 |
| Listeria_monocytogenes_1639_v56                          | Listeria_monocytogenes_1639_v25 | 0.9039 |
| Listeria_monocytogenes_1639_v55                          | Listeria_monocytogenes_1639_v25 | 0.9118 |
| Listeria_monocytogenes_1639_v54                          | Listeria_monocytogenes_1639_v25 | 0.8996 |
| Listeria_monocytogenes_1639_v53                          | Listeria_monocytogenes_1639_v25 | 0.9204 |
| Listeria_monocytogenes_1639_v52                          | Listeria_monocytogenes_1639_v25 | 0.9141 |
| Listeria_monocytogenes_1639_v51                          | Listeria_monocytogenes_1639_v25 | 0.9139 |
| Listeria_monocytogenes_1639_v50                          | Listeria_monocytogenes_1639_v25 | 0.9295 |
| Listeria_monocytogenes_1639_v4                           | Listeria_monocytogenes_1639_v25 | 0.9327 |
| Listeria_monocytogenes_1639_v49                          | Listeria_monocytogenes_1639_v25 | 0.9038 |
| Listeria_monocytogenes_1639_v48                          | Listeria_monocytogenes_1639_v25 | 0.9595 |
| Listeria_monocytogenes_1639_v47                          | Listeria_monocytogenes_1639_v25 | 0.9302 |

|                                                          |                                 |        |
|----------------------------------------------------------|---------------------------------|--------|
| Listeria_monocytogenes_1639_v46                          | Listeria_monocytogenes_1639_v25 | 0.923  |
| Listeria_monocytogenes_1639_v45                          | Listeria_monocytogenes_1639_v25 | 0.9295 |
| Listeria_monocytogenes_1639_v44                          | Listeria_monocytogenes_1639_v25 | 0.9306 |
| Listeria_monocytogenes_1639_v43                          | Listeria_monocytogenes_1639_v25 | 0.9306 |
| Listeria_monocytogenes_1639_v42                          | Listeria_monocytogenes_1639_v25 | 0.9144 |
| Listeria_monocytogenes_1639_v41                          | Listeria_monocytogenes_1639_v25 | 0.9246 |
| Listeria_monocytogenes_1639_v40                          | Listeria_monocytogenes_1639_v25 | 0.9644 |
| Listeria_monocytogenes_1639_v3                           | Listeria_monocytogenes_1639_v25 | 0.9334 |
| Listeria_monocytogenes_1639_v39                          | Listeria_monocytogenes_1639_v25 | 0.9223 |
| Listeria_monocytogenes_1639_v38                          | Listeria_monocytogenes_1639_v25 | 0.9551 |
| Listeria_monocytogenes_1639_v37                          | Listeria_monocytogenes_1639_v25 | 0.9535 |
| Listeria_monocytogenes_1639_v36                          | Listeria_monocytogenes_1639_v25 | 0.9424 |
| Listeria_monocytogenes_1639_v35                          | Listeria_monocytogenes_1639_v25 | 0.9592 |
| Listeria_monocytogenes_1639_v34                          | Listeria_monocytogenes_1639_v25 | 0.9309 |
| Listeria_monocytogenes_1639_v33                          | Listeria_monocytogenes_1639_v25 | 0.93   |
| Listeria_monocytogenes_1639_v32                          | Listeria_monocytogenes_1639_v25 | 0.9726 |
| Listeria_monocytogenes_1639_v31                          | Listeria_monocytogenes_1639_v25 | 0.9312 |
| Listeria_monocytogenes_1639_v30                          | Listeria_monocytogenes_1639_v25 | 0.9067 |
| Listeria_monocytogenes_1639_v2                           | Listeria_monocytogenes_1639_v25 | 0.9151 |
| Listeria_monocytogenes_1639_v29                          | Listeria_monocytogenes_1639_v25 | 0.9817 |
| Listeria_monocytogenes_1639_v28                          | Listeria_monocytogenes_1639_v25 | 0.9759 |
| Listeria_monocytogenes_1639_v27                          | Listeria_monocytogenes_1639_v25 | 0.9979 |
| Listeria_monocytogenes_1639_v26                          | Listeria_monocytogenes_1639_v25 | 0.9986 |
| Listeria_monocytogenes_1639_v25                          | Listeria_monocytogenes_1639_v25 | 0.0716 |
| Listeria_welshimeri_1643                                 | Listeria_monocytogenes_1639_v26 | 0.8527 |
| Listeria_welshimeri_serovar_6b_str_SLCC5334_386043       | Listeria_monocytogenes_1639_v26 | 0.8521 |
| Listeria_seeligeri_serovar_1_2b_str_SLCC3954_683837      | Listeria_monocytogenes_1639_v26 | 0.8564 |
| Listeria_seeligeri_FSL_S4-171_702452                     | Listeria_monocytogenes_1639_v26 | 0.797  |
| Listeria_seeligeri_FSL_N1-067_702453                     | Listeria_monocytogenes_1639_v26 | 0.8209 |
| Listeria_seeligeri_1640_v1                               | Listeria_monocytogenes_1639_v26 | 0.8622 |
| Listeria_seeligeri_1640                                  | Listeria_monocytogenes_1639_v26 | 0.8588 |
| Listeria_monocytogenes_WSLC1042_1457188                  | Listeria_monocytogenes_1639_v26 | 0.9066 |
| Listeria_monocytogenes_WSLC1001_1457187                  | Listeria_monocytogenes_1639_v26 | 0.9399 |
| Listeria_monocytogenes_SLCC7179_879090                   | Listeria_monocytogenes_1639_v26 | 0.936  |
| Listeria_monocytogenes_SLCC5850_882096                   | Listeria_monocytogenes_1639_v26 | 0.9363 |
| Listeria_monocytogenes_SLCC2755_932919                   | Listeria_monocytogenes_1639_v26 | 0.9383 |
| Listeria_monocytogenes_SLCC2540_879089                   | Listeria_monocytogenes_1639_v26 | 0.9249 |
| Listeria_monocytogenes_SLCC2479_882020                   | Listeria_monocytogenes_1639_v26 | 0.9632 |
| Listeria_monocytogenes_SLCC2378_879088                   | Listeria_monocytogenes_1639_v26 | 0.9079 |
| Listeria_monocytogenes_SLCC2376_882097                   | Listeria_monocytogenes_1639_v26 | 0.9123 |
| Listeria_monocytogenes_SLCC2372_932920                   | Listeria_monocytogenes_1639_v26 | 0.9711 |
| Listeria_monocytogenes_serotype_4b_str_LL195_1230340     | Listeria_monocytogenes_1639_v26 | 0.9118 |
| Listeria_monocytogenes_serotype_4b_str_LIS0087_1134669   | Listeria_monocytogenes_1639_v26 | 0.9235 |
| Listeria_monocytogenes_serotype_4b_str_F2365_265669      | Listeria_monocytogenes_1639_v26 | 0.9118 |
| Listeria_monocytogenes_serotype_4b_str_CLIP_80459_568819 | Listeria_monocytogenes_1639_v26 | 0.9143 |
| Listeria_monocytogenes_serotype_4b_str_81-0861_1196161   | Listeria_monocytogenes_1639_v26 | 0.91   |
| Listeria_monocytogenes_serotype_4b_str_81-0592_1196160   | Listeria_monocytogenes_1639_v26 | 0.911  |
| Listeria_monocytogenes_serotype_4b_str_81-0558_1196159   | Listeria_monocytogenes_1639_v26 | 0.9117 |
| Listeria_monocytogenes_serotype_4b_str_10-0809_1196162   | Listeria_monocytogenes_1639_v26 | 0.911  |
| Listeria_monocytogenes_serotype_4b_str_02-6680_1196175   | Listeria_monocytogenes_1639_v26 | 0.9115 |
| Listeria_monocytogenes_serotype_4b_str_02-6679_1196174   | Listeria_monocytogenes_1639_v26 | 0.9115 |
| Listeria_monocytogenes_serotype_4b_str_02-1792_1196173   | Listeria_monocytogenes_1639_v26 | 0.9117 |
| Listeria_monocytogenes_serotype_4b_str_02-1289_1196172   | Listeria_monocytogenes_1639_v26 | 0.9117 |
| Listeria_monocytogenes_serotype_4b_str_02-1103_1196171   | Listeria_monocytogenes_1639_v26 | 0.9117 |
| Listeria_monocytogenes_serotype_3c_str_10-5027_1196195   | Listeria_monocytogenes_1639_v26 | 0.9647 |
| Listeria_monocytogenes_serotype_1_2c_str_10-5026_1196194 | Listeria_monocytogenes_1639_v26 | 0.9658 |
| Listeria_monocytogenes_serotype_1_2c_str_10-5025_1196193 | Listeria_monocytogenes_1639_v26 | 0.9658 |
| Listeria_monocytogenes_serotype_1_2b_str_10-0811_1196164 | Listeria_monocytogenes_1639_v26 | 0.9297 |
| Listeria_monocytogenes_serotype_1_2b_str_10-0810_1196163 | Listeria_monocytogenes_1639_v26 | 0.9297 |
| Listeria_monocytogenes_serotype_1_2a_str_99-6370_1196179 | Listeria_monocytogenes_1639_v26 | 0.9256 |
| Listeria_monocytogenes_serotype_1_2a_str_98-2035_1196178 | Listeria_monocytogenes_1639_v26 | 0.9256 |
| Listeria_monocytogenes_serotype_1_2a_str_95-0093_1196177 | Listeria_monocytogenes_1639_v26 | 0.9295 |
| Listeria_monocytogenes_serotype_1_2a_str_88-0478_1196176 | Listeria_monocytogenes_1639_v26 | 0.9316 |
| Listeria_monocytogenes_serotype_1_2a_str_10-5024_1196192 | Listeria_monocytogenes_1639_v26 | 0.9306 |
| Listeria_monocytogenes_serotype_1_2a_str_10-4758_1196168 | Listeria_monocytogenes_1639_v26 | 0.939  |
| Listeria_monocytogenes_serotype_1_2a_str_10-4754_1196167 | Listeria_monocytogenes_1639_v26 | 0.939  |
| Listeria_monocytogenes_serotype_1_2a_str_10-1321_1196191 | Listeria_monocytogenes_1639_v26 | 0.9306 |
| Listeria_monocytogenes_serotype_1_2a_str_10-1047_1196190 | Listeria_monocytogenes_1639_v26 | 0.9298 |
| Listeria_monocytogenes_serotype_1_2a_str_10-1046_1196189 | Listeria_monocytogenes_1639_v26 | 0.9298 |
| Listeria_monocytogenes_serotype_1_2a_str_10-0934_1196170 | Listeria_monocytogenes_1639_v26 | 0.9356 |
| Listeria_monocytogenes_serotype_1_2a_str_10-0933_1196169 | Listeria_monocytogenes_1639_v26 | 0.9356 |
| Listeria_monocytogenes_serotype_1_2a_str_10-0815_1196188 | Listeria_monocytogenes_1639_v26 | 0.9266 |
| Listeria_monocytogenes_serotype_1_2a_str_10-0814_1196187 | Listeria_monocytogenes_1639_v26 | 0.9306 |
| Listeria_monocytogenes_serotype_1_2a_str_10-0813_1196166 | Listeria_monocytogenes_1639_v26 | 0.9419 |
| Listeria_monocytogenes_serotype_1_2a_str_10-0812_1196165 | Listeria_monocytogenes_1639_v26 | 0.9419 |
| Listeria_monocytogenes_serotype_1_2a_str_08-7669_1196186 | Listeria_monocytogenes_1639_v26 | 0.9237 |
| Listeria_monocytogenes_serotype_1_2a_str_08-7374_1196185 | Listeria_monocytogenes_1639_v26 | 0.9306 |
| Listeria_monocytogenes_serotype_1_2a_str_08-6997_1196184 | Listeria_monocytogenes_1639_v26 | 0.9266 |
| Listeria_monocytogenes_serotype_1_2a_str_08-6569_1196183 | Listeria_monocytogenes_1639_v26 | 0.9266 |
| Listeria_monocytogenes_serotype_1_2a_str_08-6056_1196182 | Listeria_monocytogenes_1639_v26 | 0.9266 |
| Listeria_monocytogenes_serotype_1_2a_str_04-5457_1196181 | Listeria_monocytogenes_1639_v26 | 0.9306 |
| Listeria_monocytogenes_serotype_1_2a_str_02-5993_1196180 | Listeria_monocytogenes_1639_v26 | 0.9302 |
| Listeria_monocytogenes_R479a_1437838                     | Listeria_monocytogenes_1639_v26 | 0.9371 |
| Listeria_monocytogenes_N53-1_1234142                     | Listeria_monocytogenes_1639_v26 | 0.8917 |
| Listeria_monocytogenes_M7_1030009                        | Listeria_monocytogenes_1639_v26 | 0.9004 |
| Listeria_monocytogenes_LO28_393132                       | Listeria_monocytogenes_1639_v26 | 0.9698 |
| Listeria_monocytogenes_L99_563174                        | Listeria_monocytogenes_1639_v26 | 0.901  |
| Listeria_monocytogenes_L312_882094                       | Listeria_monocytogenes_1639_v26 | 0.9143 |
| Listeria_monocytogenes_J1816_930781                      | Listeria_monocytogenes_1639_v26 | 0.9034 |
| Listeria_monocytogenes_J1-220_930782                     | Listeria_monocytogenes_1639_v26 | 0.9139 |
| Listeria_monocytogenes_J0161_393130                      | Listeria_monocytogenes_1639_v26 | 0.9284 |

[illegible]

|                                                          |                                 |        |
|----------------------------------------------------------|---------------------------------|--------|
| Listeria_monocytogenes_1639_v28                          | Listeria_monocytogenes_1639_v26 | 0.9759 |
| Listeria_monocytogenes_1639_v27                          | Listeria_monocytogenes_1639_v26 | 0.9986 |
| Listeria_monocytogenes_1639_v26                          | Listeria_monocytogenes_1639_v26 | 0.072  |
| Listeria_welshimeri_1643                                 | Listeria_monocytogenes_1639_v27 | 0.8526 |
| Listeria_welshimeri_serovar_6b_str_SLCC5334_386043       | Listeria_monocytogenes_1639_v27 | 0.8523 |
| Listeria_seeligeri_serovar_1_2b_str_SLCC3954_683837      | Listeria_monocytogenes_1639_v27 | 0.8567 |
| Listeria_seeligeri_FSL_S4-171_702452                     | Listeria_monocytogenes_1639_v27 | 0.7973 |
| Listeria_seeligeri_FSL_N1-067_702453                     | Listeria_monocytogenes_1639_v27 | 0.8212 |
| Listeria_seeligeri_1640_v1                               | Listeria_monocytogenes_1639_v27 | 0.8625 |
| Listeria_seeligeri_1640                                  | Listeria_monocytogenes_1639_v27 | 0.8588 |
| Listeria_monocytogenes_WSLC1042_1457188                  | Listeria_monocytogenes_1639_v27 | 0.9069 |
| Listeria_monocytogenes_WSLC1001_1457187                  | Listeria_monocytogenes_1639_v27 | 0.9402 |
| Listeria_monocytogenes_SLCC7179_879090                   | Listeria_monocytogenes_1639_v27 | 0.9364 |
| Listeria_monocytogenes_SLCC5850_882096                   | Listeria_monocytogenes_1639_v27 | 0.9367 |
| Listeria_monocytogenes_SLCC2755_932919                   | Listeria_monocytogenes_1639_v27 | 0.9383 |
| Listeria_monocytogenes_SLCC2540_879089                   | Listeria_monocytogenes_1639_v27 | 0.9248 |
| Listeria_monocytogenes_SLCC2479_882020                   | Listeria_monocytogenes_1639_v27 | 0.9647 |
| Listeria_monocytogenes_SLCC2378_879088                   | Listeria_monocytogenes_1639_v27 | 0.9079 |
| Listeria_monocytogenes_SLCC2376_882097                   | Listeria_monocytogenes_1639_v27 | 0.913  |
| Listeria_monocytogenes_SLCC2372_932920                   | Listeria_monocytogenes_1639_v27 | 0.9725 |
| Listeria_monocytogenes_serotype_4b_str_LL195_1230340     | Listeria_monocytogenes_1639_v27 | 0.9118 |
| Listeria_monocytogenes_serotype_4b_str_LIS0087_1134669   | Listeria_monocytogenes_1639_v27 | 0.9235 |
| Listeria_monocytogenes_serotype_4b_str_F2365_265669      | Listeria_monocytogenes_1639_v27 | 0.9118 |
| Listeria_monocytogenes_serotype_4b_str_CLIP_80459_568819 | Listeria_monocytogenes_1639_v27 | 0.9143 |
| Listeria_monocytogenes_serotype_4b_str_81-0861_1196161   | Listeria_monocytogenes_1639_v27 | 0.9092 |
| Listeria_monocytogenes_serotype_4b_str_81-0592_1196160   | Listeria_monocytogenes_1639_v27 | 0.9103 |
| Listeria_monocytogenes_serotype_4b_str_81-0558_1196159   | Listeria_monocytogenes_1639_v27 | 0.9106 |
| Listeria_monocytogenes_serotype_4b_str_10-0809_1196162   | Listeria_monocytogenes_1639_v27 | 0.9103 |
| Listeria_monocytogenes_serotype_4b_str_02-6680_1196175   | Listeria_monocytogenes_1639_v27 | 0.9118 |
| Listeria_monocytogenes_serotype_4b_str_02-6679_1196174   | Listeria_monocytogenes_1639_v27 | 0.9118 |
| Listeria_monocytogenes_serotype_4b_str_02-1792_1196173   | Listeria_monocytogenes_1639_v27 | 0.9106 |
| Listeria_monocytogenes_serotype_4b_str_02-1289_1196172   | Listeria_monocytogenes_1639_v27 | 0.9106 |
| Listeria_monocytogenes_serotype_4b_str_02-1103_1196171   | Listeria_monocytogenes_1639_v27 | 0.9106 |
| Listeria_monocytogenes_serotype_3c_str_10-5027_1196195   | Listeria_monocytogenes_1639_v27 | 0.9643 |
| Listeria_monocytogenes_serotype_1_2c_str_10-5026_1196194 | Listeria_monocytogenes_1639_v27 | 0.965  |
| Listeria_monocytogenes_serotype_1_2c_str_10-5025_1196193 | Listeria_monocytogenes_1639_v27 | 0.965  |
| Listeria_monocytogenes_serotype_1_2b_str_10-0811_1196164 | Listeria_monocytogenes_1639_v27 | 0.9289 |
| Listeria_monocytogenes_serotype_1_2b_str_10-0810_1196163 | Listeria_monocytogenes_1639_v27 | 0.9289 |
| Listeria_monocytogenes_serotype_1_2a_str_99-6370_1196179 | Listeria_monocytogenes_1639_v27 | 0.9256 |
| Listeria_monocytogenes_serotype_1_2a_str_98-2035_1196178 | Listeria_monocytogenes_1639_v27 | 0.9256 |
| Listeria_monocytogenes_serotype_1_2a_str_95-0093_1196177 | Listeria_monocytogenes_1639_v27 | 0.9298 |
| Listeria_monocytogenes_serotype_1_2a_str_88-0478_1196176 | Listeria_monocytogenes_1639_v27 | 0.9316 |
| Listeria_monocytogenes_serotype_1_2a_str_10-5024_1196192 | Listeria_monocytogenes_1639_v27 | 0.9305 |
| Listeria_monocytogenes_serotype_1_2a_str_10-4758_1196168 | Listeria_monocytogenes_1639_v27 | 0.9393 |
| Listeria_monocytogenes_serotype_1_2a_str_10-4754_1196167 | Listeria_monocytogenes_1639_v27 | 0.9397 |
| Listeria_monocytogenes_serotype_1_2a_str_10-1321_1196191 | Listeria_monocytogenes_1639_v27 | 0.9305 |
| Listeria_monocytogenes_serotype_1_2a_str_10-1047_1196190 | Listeria_monocytogenes_1639_v27 | 0.9301 |
| Listeria_monocytogenes_serotype_1_2a_str_10-1046_1196189 | Listeria_monocytogenes_1639_v27 | 0.9301 |
| Listeria_monocytogenes_serotype_1_2a_str_10-0934_1196170 | Listeria_monocytogenes_1639_v27 | 0.9363 |
| Listeria_monocytogenes_serotype_1_2a_str_10-0933_1196169 | Listeria_monocytogenes_1639_v27 | 0.9363 |
| Listeria_monocytogenes_serotype_1_2a_str_10-0815_1196188 | Listeria_monocytogenes_1639_v27 | 0.9265 |
| Listeria_monocytogenes_serotype_1_2a_str_10-0814_1196187 | Listeria_monocytogenes_1639_v27 | 0.9305 |
| Listeria_monocytogenes_serotype_1_2a_str_10-0813_1196166 | Listeria_monocytogenes_1639_v27 | 0.9419 |
| Listeria_monocytogenes_serotype_1_2a_str_10-0812_1196165 | Listeria_monocytogenes_1639_v27 | 0.9419 |
| Listeria_monocytogenes_serotype_1_2a_str_08-7669_1196186 | Listeria_monocytogenes_1639_v27 | 0.924  |
| Listeria_monocytogenes_serotype_1_2a_str_08-7374_1196185 | Listeria_monocytogenes_1639_v27 | 0.9305 |
| Listeria_monocytogenes_serotype_1_2a_str_08-6997_1196184 | Listeria_monocytogenes_1639_v27 | 0.9265 |
| Listeria_monocytogenes_serotype_1_2a_str_08-6569_1196183 | Listeria_monocytogenes_1639_v27 | 0.9265 |
| Listeria_monocytogenes_serotype_1_2a_str_08-6056_1196182 | Listeria_monocytogenes_1639_v27 | 0.9265 |
| Listeria_monocytogenes_serotype_1_2a_str_04-5457_1196181 | Listeria_monocytogenes_1639_v27 | 0.9305 |
| Listeria_monocytogenes_serotype_1_2a_str_02-5993_1196180 | Listeria_monocytogenes_1639_v27 | 0.9305 |
| Listeria_monocytogenes_R479a_1437838                     | Listeria_monocytogenes_1639_v27 | 0.9367 |
| Listeria_monocytogenes_N53-1_1234142                     | Listeria_monocytogenes_1639_v27 | 0.892  |
| Listeria_monocytogenes_M7_1030009                        | Listeria_monocytogenes_1639_v27 | 0.9007 |
| Listeria_monocytogenes_LO28_393132                       | Listeria_monocytogenes_1639_v27 | 0.9695 |
| Listeria_monocytogenes_L99_563174                        | Listeria_monocytogenes_1639_v27 | 0.901  |
| Listeria_monocytogenes_L312_882094                       | Listeria_monocytogenes_1639_v27 | 0.9143 |
| Listeria_monocytogenes_J1816_930781                      | Listeria_monocytogenes_1639_v27 | 0.9026 |
| Listeria_monocytogenes_J1-220_930782                     | Listeria_monocytogenes_1639_v27 | 0.9131 |
| Listeria_monocytogenes_J0161_393130                      | Listeria_monocytogenes_1639_v27 | 0.9276 |
| Listeria_monocytogenes_HCC23_552536                      | Listeria_monocytogenes_1639_v27 | 0.9003 |
| Listeria_monocytogenes_FSL_R2-561_393126                 | Listeria_monocytogenes_1639_v27 | 0.9614 |
| Listeria_monocytogenes_FSL_J1-208_393119                 | Listeria_monocytogenes_1639_v27 | 0.8795 |
| Listeria_monocytogenes_FSL_J1-175_393118                 | Listeria_monocytogenes_1639_v27 | 0.9249 |
| Listeria_monocytogenes_Finland_1998_393127               | Listeria_monocytogenes_1639_v27 | 0.9307 |
| Listeria_monocytogenes_EGD-e_169963_v1                   | Listeria_monocytogenes_1639_v27 | 0.9552 |
| Listeria_monocytogenes_EGD-e_169963                      | Listeria_monocytogenes_1639_v27 | 0.9552 |
| Listeria_monocytogenes_EGD_1334565                       | Listeria_monocytogenes_1639_v27 | 0.9374 |
| Listeria_monocytogenes_CFSAN002349_1299895               | Listeria_monocytogenes_1639_v27 | 0.9149 |
| Listeria_monocytogenes_ATCC_19117_882095_v1              | Listeria_monocytogenes_1639_v27 | 0.9091 |
| Listeria_monocytogenes_ATCC_19117_882095                 | Listeria_monocytogenes_1639_v27 | 0.9087 |
| Listeria_monocytogenes_6179_1288295                      | Listeria_monocytogenes_1639_v27 | 0.9387 |
| Listeria_monocytogenes_1639_v9                           | Listeria_monocytogenes_1639_v27 | 0.9152 |
| Listeria_monocytogenes_1639_v99                          | Listeria_monocytogenes_1639_v27 | 0.9121 |
| Listeria_monocytogenes_1639_v98                          | Listeria_monocytogenes_1639_v27 | 0.9301 |
| Listeria_monocytogenes_1639_v97                          | Listeria_monocytogenes_1639_v27 | 0.9063 |
| Listeria_monocytogenes_1639_v96                          | Listeria_monocytogenes_1639_v27 | 0.9118 |
| Listeria_monocytogenes_1639_v95                          | Listeria_monocytogenes_1639_v27 | 0.9118 |
| Listeria_monocytogenes_1639_v94                          | Listeria_monocytogenes_1639_v27 | 0.9121 |
| Listeria_monocytogenes_1639_v93                          | Listeria_monocytogenes_1639_v27 | 0.9363 |
| Listeria_monocytogenes_1639_v92                          | Listeria_monocytogenes_1639_v27 | 0.9114 |



|                                                        |                                 |        |
|--------------------------------------------------------|---------------------------------|--------|
| Listeria_monocytogenes_1639_v91                        | Listeria_monocytogenes_1639_v27 | 0.9171 |
| Listeria_monocytogenes_1639_v90                        | Listeria_monocytogenes_1639_v27 | 0.9301 |
| Listeria_monocytogenes_1639_v8                         | Listeria_monocytogenes_1639_v27 | 0.9471 |
| Listeria_monocytogenes_1639_v89                        | Listeria_monocytogenes_1639_v27 | 0.9169 |
| Listeria_monocytogenes_1639_v88                        | Listeria_monocytogenes_1639_v27 | 0.9358 |
| Listeria_monocytogenes_1639_v87                        | Listeria_monocytogenes_1639_v27 | 0.9418 |
| Listeria_monocytogenes_1639_v86                        | Listeria_monocytogenes_1639_v27 | 0.9415 |
| Listeria_monocytogenes_1639_v85                        | Listeria_monocytogenes_1639_v27 | 0.9079 |
| Listeria_monocytogenes_1639_v84                        | Listeria_monocytogenes_1639_v27 | 0.936  |
| Listeria_monocytogenes_1639_v83                        | Listeria_monocytogenes_1639_v27 | 0.9098 |
| Listeria_monocytogenes_1639_v82                        | Listeria_monocytogenes_1639_v27 | 0.9095 |
| Listeria_monocytogenes_1639_v81                        | Listeria_monocytogenes_1639_v27 | 0.9368 |
| Listeria_monocytogenes_1639_v80                        | Listeria_monocytogenes_1639_v27 | 0.9279 |
| Listeria_monocytogenes_1639_v7                         | Listeria_monocytogenes_1639_v27 | 0.9471 |
| Listeria_monocytogenes_1639_v79                        | Listeria_monocytogenes_1639_v27 | 0.9322 |
| Listeria_monocytogenes_1639_v78                        | Listeria_monocytogenes_1639_v27 | 0.9354 |
| Listeria_monocytogenes_1639_v77                        | Listeria_monocytogenes_1639_v27 | 0.9245 |
| Listeria_monocytogenes_1639_v76                        | Listeria_monocytogenes_1639_v27 | 0.9279 |
| Listeria_monocytogenes_1639_v75                        | Listeria_monocytogenes_1639_v27 | 0.901  |
| Listeria_monocytogenes_1639_v74                        | Listeria_monocytogenes_1639_v27 | 0.936  |
| Listeria_monocytogenes_1639_v73                        | Listeria_monocytogenes_1639_v27 | 0.9815 |
| Listeria_monocytogenes_1639_v72                        | Listeria_monocytogenes_1639_v27 | 0.9079 |
| Listeria_monocytogenes_1639_v71                        | Listeria_monocytogenes_1639_v27 | 0.9213 |
| Listeria_monocytogenes_1639_v70                        | Listeria_monocytogenes_1639_v27 | 0.971  |
| Listeria_monocytogenes_1639_v6                         | Listeria_monocytogenes_1639_v27 | 0.9467 |
| Listeria_monocytogenes_1639_v69                        | Listeria_monocytogenes_1639_v27 | 0.9103 |
| Listeria_monocytogenes_1639_v68                        | Listeria_monocytogenes_1639_v27 | 0.9324 |
| Listeria_monocytogenes_1639_v67                        | Listeria_monocytogenes_1639_v27 | 0.9204 |
| Listeria_monocytogenes_1639_v66                        | Listeria_monocytogenes_1639_v27 | 0.9394 |
| Listeria_monocytogenes_1639_v65                        | Listeria_monocytogenes_1639_v27 | 0.9416 |
| Listeria_monocytogenes_1639_v64                        | Listeria_monocytogenes_1639_v27 | 0.9344 |
| Listeria_monocytogenes_1639_v63                        | Listeria_monocytogenes_1639_v27 | 0.9296 |
| Listeria_monocytogenes_1639_v62                        | Listeria_monocytogenes_1639_v27 | 0.9306 |
| Listeria_monocytogenes_1639_v61                        | Listeria_monocytogenes_1639_v27 | 0.9314 |
| Listeria_monocytogenes_1639_v60                        | Listeria_monocytogenes_1639_v27 | 0.9226 |
| Listeria_monocytogenes_1639_v5                         | Listeria_monocytogenes_1639_v27 | 0.9193 |
| Listeria_monocytogenes_1639_v59                        | Listeria_monocytogenes_1639_v27 | 0.9097 |
| Listeria_monocytogenes_1639_v58                        | Listeria_monocytogenes_1639_v27 | 0.9134 |
| Listeria_monocytogenes_1639_v57                        | Listeria_monocytogenes_1639_v27 | 0.9002 |
| Listeria_monocytogenes_1639_v56                        | Listeria_monocytogenes_1639_v27 | 0.9046 |
| Listeria_monocytogenes_1639_v55                        | Listeria_monocytogenes_1639_v27 | 0.9114 |
| Listeria_monocytogenes_1639_v54                        | Listeria_monocytogenes_1639_v27 | 0.8996 |
| Listeria_monocytogenes_1639_v53                        | Listeria_monocytogenes_1639_v27 | 0.9211 |
| Listeria_monocytogenes_1639_v52                        | Listeria_monocytogenes_1639_v27 | 0.914  |
| Listeria_monocytogenes_1639_v51                        | Listeria_monocytogenes_1639_v27 | 0.9142 |
| Listeria_monocytogenes_1639_v50                        | Listeria_monocytogenes_1639_v27 | 0.9291 |
| Listeria_monocytogenes_1639_v4                         | Listeria_monocytogenes_1639_v27 | 0.9316 |
| Listeria_monocytogenes_1639_v49                        | Listeria_monocytogenes_1639_v27 | 0.9041 |
| Listeria_monocytogenes_1639_v48                        | Listeria_monocytogenes_1639_v27 | 0.9591 |
| Listeria_monocytogenes_1639_v47                        | Listeria_monocytogenes_1639_v27 | 0.9302 |
| Listeria_monocytogenes_1639_v46                        | Listeria_monocytogenes_1639_v27 | 0.9234 |
| Listeria_monocytogenes_1639_v45                        | Listeria_monocytogenes_1639_v27 | 0.9291 |
| Listeria_monocytogenes_1639_v44                        | Listeria_monocytogenes_1639_v27 | 0.9305 |
| Listeria_monocytogenes_1639_v43                        | Listeria_monocytogenes_1639_v27 | 0.9305 |
| Listeria_monocytogenes_1639_v42                        | Listeria_monocytogenes_1639_v27 | 0.9144 |
| Listeria_monocytogenes_1639_v41                        | Listeria_monocytogenes_1639_v27 | 0.9246 |
| Listeria_monocytogenes_1639_v40                        | Listeria_monocytogenes_1639_v27 | 0.9647 |
| Listeria_monocytogenes_1639_v3                         | Listeria_monocytogenes_1639_v27 | 0.9323 |
| Listeria_monocytogenes_1639_v39                        | Listeria_monocytogenes_1639_v27 | 0.9215 |
| Listeria_monocytogenes_1639_v38                        | Listeria_monocytogenes_1639_v27 | 0.9557 |
| Listeria_monocytogenes_1639_v37                        | Listeria_monocytogenes_1639_v27 | 0.9542 |
| Listeria_monocytogenes_1639_v36                        | Listeria_monocytogenes_1639_v27 | 0.9431 |
| Listeria_monocytogenes_1639_v35                        | Listeria_monocytogenes_1639_v27 | 0.9596 |
| Listeria_monocytogenes_1639_v34                        | Listeria_monocytogenes_1639_v27 | 0.9308 |
| Listeria_monocytogenes_1639_v33                        | Listeria_monocytogenes_1639_v27 | 0.9289 |
| Listeria_monocytogenes_1639_v32                        | Listeria_monocytogenes_1639_v27 | 0.9723 |
| Listeria_monocytogenes_1639_v31                        | Listeria_monocytogenes_1639_v27 | 0.9312 |
| Listeria_monocytogenes_1639_v30                        | Listeria_monocytogenes_1639_v27 | 0.9066 |
| Listeria_monocytogenes_1639_v2                         | Listeria_monocytogenes_1639_v27 | 0.9154 |
| Listeria_monocytogenes_1639_v29                        | Listeria_monocytogenes_1639_v27 | 0.9813 |
| Listeria_monocytogenes_1639_v28                        | Listeria_monocytogenes_1639_v27 | 0.9773 |
| Listeria_monocytogenes_1639_v27                        | Listeria_monocytogenes_1639_v27 | 0.0717 |
| Listeria_welshimeri_1643                               | Listeria_monocytogenes_1639_v28 | 0.8608 |
| Listeria_welshimeri_serovar_6b_str_SLCC5334_386043     | Listeria_monocytogenes_1639_v28 | 0.8605 |
| Listeria_seeligeri_serovar_1_2b_str_SLCC3954_683837    | Listeria_monocytogenes_1639_v28 | 0.8661 |
| Listeria_seeligeri_FSL_S4-171_702452                   | Listeria_monocytogenes_1639_v28 | 0.8105 |
| Listeria_seeligeri_FSL_N1-067_702453                   | Listeria_monocytogenes_1639_v28 | 0.832  |
| Listeria_seeligeri_1640_v1                             | Listeria_monocytogenes_1639_v28 | 0.8689 |
| Listeria_seeligeri_1640                                | Listeria_monocytogenes_1639_v28 | 0.8625 |
| Listeria_monocytogenes_WSLC1042_1457188                | Listeria_monocytogenes_1639_v28 | 0.9156 |
| Listeria_monocytogenes_WSLC1001_1457187                | Listeria_monocytogenes_1639_v28 | 0.9493 |
| Listeria_monocytogenes_SLCC7179_879090                 | Listeria_monocytogenes_1639_v28 | 0.9398 |
| Listeria_monocytogenes_SLCC5850_882096                 | Listeria_monocytogenes_1639_v28 | 0.9464 |
| Listeria_monocytogenes_SLCC2755_932919                 | Listeria_monocytogenes_1639_v28 | 0.9325 |
| Listeria_monocytogenes_SLCC2540_879089                 | Listeria_monocytogenes_1639_v28 | 0.9333 |
| Listeria_monocytogenes_SLCC2479_882020                 | Listeria_monocytogenes_1639_v28 | 0.979  |
| Listeria_monocytogenes_SLCC2378_879088                 | Listeria_monocytogenes_1639_v28 | 0.9166 |
| Listeria_monocytogenes_SLCC2376_882097                 | Listeria_monocytogenes_1639_v28 | 0.9223 |
| Listeria_monocytogenes_SLCC2372_932920                 | Listeria_monocytogenes_1639_v28 | 0.9708 |
| Listeria_monocytogenes_serotype_4b_str_LL195_1230340   | Listeria_monocytogenes_1639_v28 | 0.9209 |
| Listeria_monocytogenes_serotype_4b_str_LIS0087_1134669 | Listeria_monocytogenes_1639_v28 | 0.9261 |

|                                                          |                                 |        |
|----------------------------------------------------------|---------------------------------|--------|
| Listeria_monocytogenes_serotype_4b_str_F2365_265669      | Listeria_monocytogenes_1639_v28 | 0.9209 |
| Listeria_monocytogenes_serotype_4b_str_CLIP_80459_568819 | Listeria_monocytogenes_1639_v28 | 0.9235 |
| Listeria_monocytogenes_serotype_4b_str_81-0861_1196161   | Listeria_monocytogenes_1639_v28 | 0.9131 |
| Listeria_monocytogenes_serotype_4b_str_81-0592_1196160   | Listeria_monocytogenes_1639_v28 | 0.9141 |
| Listeria_monocytogenes_serotype_4b_str_81-0558_1196159   | Listeria_monocytogenes_1639_v28 | 0.9145 |
| Listeria_monocytogenes_serotype_4b_str_10-0809_1196162   | Listeria_monocytogenes_1639_v28 | 0.9141 |
| Listeria_monocytogenes_serotype_4b_str_02-6680_1196175   | Listeria_monocytogenes_1639_v28 | 0.921  |
| Listeria_monocytogenes_serotype_4b_str_02-6679_1196174   | Listeria_monocytogenes_1639_v28 | 0.921  |
| Listeria_monocytogenes_serotype_4b_str_02-1792_1196173   | Listeria_monocytogenes_1639_v28 | 0.9141 |
| Listeria_monocytogenes_serotype_4b_str_02-1289_1196172   | Listeria_monocytogenes_1639_v28 | 0.9141 |
| Listeria_monocytogenes_serotype_4b_str_02-1103_1196171   | Listeria_monocytogenes_1639_v28 | 0.9141 |
| Listeria_monocytogenes_serotype_3c_str_10-5027_1196195   | Listeria_monocytogenes_1639_v28 | 0.9761 |
| Listeria_monocytogenes_serotype_1_2c_str_10-5026_1196194 | Listeria_monocytogenes_1639_v28 | 0.9772 |
| Listeria_monocytogenes_serotype_1_2c_str_10-5025_1196193 | Listeria_monocytogenes_1639_v28 | 0.9772 |
| Listeria_monocytogenes_serotype_1_2b_str_10-0811_1196164 | Listeria_monocytogenes_1639_v28 | 0.9322 |
| Listeria_monocytogenes_serotype_1_2b_str_10-0810_1196163 | Listeria_monocytogenes_1639_v28 | 0.9322 |
| Listeria_monocytogenes_serotype_1_2a_str_99-6370_1196179 | Listeria_monocytogenes_1639_v28 | 0.9408 |
| Listeria_monocytogenes_serotype_1_2a_str_98-2035_1196178 | Listeria_monocytogenes_1639_v28 | 0.9408 |
| Listeria_monocytogenes_serotype_1_2a_str_95-0093_1196177 | Listeria_monocytogenes_1639_v28 | 0.9459 |
| Listeria_monocytogenes_serotype_1_2a_str_88-0478_1196176 | Listeria_monocytogenes_1639_v28 | 0.9481 |
| Listeria_monocytogenes_serotype_1_2a_str_10-5024_1196192 | Listeria_monocytogenes_1639_v28 | 0.9463 |
| Listeria_monocytogenes_serotype_1_2a_str_10-4758_1196168 | Listeria_monocytogenes_1639_v28 | 0.9491 |
| Listeria_monocytogenes_serotype_1_2a_str_10-4754_1196167 | Listeria_monocytogenes_1639_v28 | 0.9495 |
| Listeria_monocytogenes_serotype_1_2a_str_10-1321_1196191 | Listeria_monocytogenes_1639_v28 | 0.9463 |
| Listeria_monocytogenes_serotype_1_2a_str_10-1047_1196190 | Listeria_monocytogenes_1639_v28 | 0.9459 |
| Listeria_monocytogenes_serotype_1_2a_str_10-1046_1196189 | Listeria_monocytogenes_1639_v28 | 0.9459 |
| Listeria_monocytogenes_serotype_1_2a_str_10-0934_1196170 | Listeria_monocytogenes_1639_v28 | 0.9458 |
| Listeria_monocytogenes_serotype_1_2a_str_10-0933_1196169 | Listeria_monocytogenes_1639_v28 | 0.9458 |
| Listeria_monocytogenes_serotype_1_2a_str_10-0815_1196188 | Listeria_monocytogenes_1639_v28 | 0.9422 |
| Listeria_monocytogenes_serotype_1_2a_str_10-0814_1196187 | Listeria_monocytogenes_1639_v28 | 0.9463 |
| Listeria_monocytogenes_serotype_1_2a_str_10-0813_1196166 | Listeria_monocytogenes_1639_v28 | 0.9483 |
| Listeria_monocytogenes_serotype_1_2a_str_10-0812_1196165 | Listeria_monocytogenes_1639_v28 | 0.9483 |
| Listeria_monocytogenes_serotype_1_2a_str_08-7669_1196186 | Listeria_monocytogenes_1639_v28 | 0.9409 |
| Listeria_monocytogenes_serotype_1_2a_str_08-7374_1196185 | Listeria_monocytogenes_1639_v28 | 0.9463 |
| Listeria_monocytogenes_serotype_1_2a_str_08-6997_1196184 | Listeria_monocytogenes_1639_v28 | 0.9422 |
| Listeria_monocytogenes_serotype_1_2a_str_08-6569_1196183 | Listeria_monocytogenes_1639_v28 | 0.9422 |
| Listeria_monocytogenes_serotype_1_2a_str_08-6056_1196182 | Listeria_monocytogenes_1639_v28 | 0.9422 |
| Listeria_monocytogenes_serotype_1_2a_str_04-5457_1196181 | Listeria_monocytogenes_1639_v28 | 0.9463 |
| Listeria_monocytogenes_serotype_1_2a_str_02-5993_1196180 | Listeria_monocytogenes_1639_v28 | 0.9463 |
| Listeria_monocytogenes_R479a_1437838                     | Listeria_monocytogenes_1639_v28 | 0.9419 |
| Listeria_monocytogenes_N53-1_1234142                     | Listeria_monocytogenes_1639_v28 | 0.8977 |
| Listeria_monocytogenes_M7_1030009                        | Listeria_monocytogenes_1639_v28 | 0.9029 |
| Listeria_monocytogenes_LO28_393132                       | Listeria_monocytogenes_1639_v28 | 0.9728 |
| Listeria_monocytogenes_L99_563174                        | Listeria_monocytogenes_1639_v28 | 0.9032 |
| Listeria_monocytogenes_L312_882094                       | Listeria_monocytogenes_1639_v28 | 0.9235 |
| Listeria_monocytogenes_J1816_930781                      | Listeria_monocytogenes_1639_v28 | 0.917  |
| Listeria_monocytogenes_J1-220_930782                     | Listeria_monocytogenes_1639_v28 | 0.9159 |
| Listeria_monocytogenes_J0161_393130                      | Listeria_monocytogenes_1639_v28 | 0.9379 |
| Listeria_monocytogenes_HCC23_552536                      | Listeria_monocytogenes_1639_v28 | 0.9029 |
| Listeria_monocytogenes_FSL_R2-561_393126                 | Listeria_monocytogenes_1639_v28 | 0.9761 |
| Listeria_monocytogenes_FSL_J1-208_393119                 | Listeria_monocytogenes_1639_v28 | 0.8879 |
| Listeria_monocytogenes_FSL_J1-175_393118                 | Listeria_monocytogenes_1639_v28 | 0.9338 |
| Listeria_monocytogenes_Finland_1998_393127               | Listeria_monocytogenes_1639_v28 | 0.9398 |
| Listeria_monocytogenes_EGD-e_169963_v1                   | Listeria_monocytogenes_1639_v28 | 0.9603 |
| Listeria_monocytogenes_EGD-e_169963                      | Listeria_monocytogenes_1639_v28 | 0.9603 |
| Listeria_monocytogenes_EGD_1334565                       | Listeria_monocytogenes_1639_v28 | 0.9472 |
| Listeria_monocytogenes_CFSAN002349_1299895               | Listeria_monocytogenes_1639_v28 | 0.9241 |
| Listeria_monocytogenes_ATCC_19117_882095_v1              | Listeria_monocytogenes_1639_v28 | 0.9178 |
| Listeria_monocytogenes_ATCC_19117_882095                 | Listeria_monocytogenes_1639_v28 | 0.9175 |
| Listeria_monocytogenes_6179_1288295                      | Listeria_monocytogenes_1639_v28 | 0.9402 |
| Listeria_monocytogenes_1639_v9                           | Listeria_monocytogenes_1639_v28 | 0.9245 |
| Listeria_monocytogenes_1639_v99                          | Listeria_monocytogenes_1639_v28 | 0.9182 |
| Listeria_monocytogenes_1639_v98                          | Listeria_monocytogenes_1639_v28 | 0.9412 |
| Listeria_monocytogenes_1639_v97                          | Listeria_monocytogenes_1639_v28 | 0.9223 |
| Listeria_monocytogenes_1639_v96                          | Listeria_monocytogenes_1639_v28 | 0.9175 |
| Listeria_monocytogenes_1639_v95                          | Listeria_monocytogenes_1639_v28 | 0.9175 |
| Listeria_monocytogenes_1639_v94                          | Listeria_monocytogenes_1639_v28 | 0.9178 |
| Listeria_monocytogenes_1639_v93                          | Listeria_monocytogenes_1639_v28 | 0.9356 |
| Listeria_monocytogenes_1639_v92                          | Listeria_monocytogenes_1639_v28 | 0.9193 |
| Listeria_monocytogenes_1639_v91                          | Listeria_monocytogenes_1639_v28 | 0.9199 |
| Listeria_monocytogenes_1639_v90                          | Listeria_monocytogenes_1639_v28 | 0.9412 |
| Listeria_monocytogenes_1639_v8                           | Listeria_monocytogenes_1639_v28 | 0.9527 |
| Listeria_monocytogenes_1639_v89                          | Listeria_monocytogenes_1639_v28 | 0.9212 |
| Listeria_monocytogenes_1639_v88                          | Listeria_monocytogenes_1639_v28 | 0.951  |
| Listeria_monocytogenes_1639_v87                          | Listeria_monocytogenes_1639_v28 | 0.9434 |
| Listeria_monocytogenes_1639_v86                          | Listeria_monocytogenes_1639_v28 | 0.9431 |
| Listeria_monocytogenes_1639_v85                          | Listeria_monocytogenes_1639_v28 | 0.9113 |
| Listeria_monocytogenes_1639_v84                          | Listeria_monocytogenes_1639_v28 | 0.9512 |
| Listeria_monocytogenes_1639_v83                          | Listeria_monocytogenes_1639_v28 | 0.9125 |
| Listeria_monocytogenes_1639_v82                          | Listeria_monocytogenes_1639_v28 | 0.9122 |
| Listeria_monocytogenes_1639_v81                          | Listeria_monocytogenes_1639_v28 | 0.9517 |
| Listeria_monocytogenes_1639_v80                          | Listeria_monocytogenes_1639_v28 | 0.932  |
| Listeria_monocytogenes_1639_v7                           | Listeria_monocytogenes_1639_v28 | 0.9527 |
| Listeria_monocytogenes_1639_v79                          | Listeria_monocytogenes_1639_v28 | 0.947  |
| Listeria_monocytogenes_1639_v78                          | Listeria_monocytogenes_1639_v28 | 0.951  |
| Listeria_monocytogenes_1639_v77                          | Listeria_monocytogenes_1639_v28 | 0.9393 |
| Listeria_monocytogenes_1639_v76                          | Listeria_monocytogenes_1639_v28 | 0.9447 |
| Listeria_monocytogenes_1639_v75                          | Listeria_monocytogenes_1639_v28 | 0.9032 |
| Listeria_monocytogenes_1639_v74                          | Listeria_monocytogenes_1639_v28 | 0.9313 |
| Listeria_monocytogenes_1639_v73                          | Listeria_monocytogenes_1639_v28 | 0.9686 |
| Listeria_monocytogenes_1639_v72                          | Listeria_monocytogenes_1639_v28 | 0.9128 |

|                                                          |                                 |        |
|----------------------------------------------------------|---------------------------------|--------|
| Listeria_monocytogenes_1639_v71                          | Listeria_monocytogenes_1639_v28 | 0.9325 |
| Listeria_monocytogenes_1639_v70                          | Listeria_monocytogenes_1639_v28 | 0.9802 |
| Listeria_monocytogenes_1639_v6                           | Listeria_monocytogenes_1639_v28 | 0.9523 |
| Listeria_monocytogenes_1639_v69                          | Listeria_monocytogenes_1639_v28 | 0.9141 |
| Listeria_monocytogenes_1639_v68                          | Listeria_monocytogenes_1639_v28 | 0.9332 |
| Listeria_monocytogenes_1639_v67                          | Listeria_monocytogenes_1639_v28 | 0.9384 |
| Listeria_monocytogenes_1639_v66                          | Listeria_monocytogenes_1639_v28 | 0.9484 |
| Listeria_monocytogenes_1639_v65                          | Listeria_monocytogenes_1639_v28 | 0.9424 |
| Listeria_monocytogenes_1639_v64                          | Listeria_monocytogenes_1639_v28 | 0.9425 |
| Listeria_monocytogenes_1639_v63                          | Listeria_monocytogenes_1639_v28 | 0.934  |
| Listeria_monocytogenes_1639_v62                          | Listeria_monocytogenes_1639_v28 | 0.9475 |
| Listeria_monocytogenes_1639_v61                          | Listeria_monocytogenes_1639_v28 | 0.9472 |
| Listeria_monocytogenes_1639_v60                          | Listeria_monocytogenes_1639_v28 | 0.9413 |
| Listeria_monocytogenes_1639_v5                           | Listeria_monocytogenes_1639_v28 | 0.9054 |
| Listeria_monocytogenes_1639_v59                          | Listeria_monocytogenes_1639_v28 | 0.918  |
| Listeria_monocytogenes_1639_v58                          | Listeria_monocytogenes_1639_v28 | 0.9177 |
| Listeria_monocytogenes_1639_v57                          | Listeria_monocytogenes_1639_v28 | 0.9156 |
| Listeria_monocytogenes_1639_v56                          | Listeria_monocytogenes_1639_v28 | 0.921  |
| Listeria_monocytogenes_1639_v55                          | Listeria_monocytogenes_1639_v28 | 0.9116 |
| Listeria_monocytogenes_1639_v54                          | Listeria_monocytogenes_1639_v28 | 0.9141 |
| Listeria_monocytogenes_1639_v53                          | Listeria_monocytogenes_1639_v28 | 0.9288 |
| Listeria_monocytogenes_1639_v52                          | Listeria_monocytogenes_1639_v28 | 0.9179 |
| Listeria_monocytogenes_1639_v51                          | Listeria_monocytogenes_1639_v28 | 0.909  |
| Listeria_monocytogenes_1639_v50                          | Listeria_monocytogenes_1639_v28 | 0.9448 |
| Listeria_monocytogenes_1639_v4                           | Listeria_monocytogenes_1639_v28 | 0.918  |
| Listeria_monocytogenes_1639_v49                          | Listeria_monocytogenes_1639_v28 | 0.9127 |
| Listeria_monocytogenes_1639_v48                          | Listeria_monocytogenes_1639_v28 | 0.9722 |
| Listeria_monocytogenes_1639_v47                          | Listeria_monocytogenes_1639_v28 | 0.9459 |
| Listeria_monocytogenes_1639_v46                          | Listeria_monocytogenes_1639_v28 | 0.9381 |
| Listeria_monocytogenes_1639_v45                          | Listeria_monocytogenes_1639_v28 | 0.9367 |
| Listeria_monocytogenes_1639_v44                          | Listeria_monocytogenes_1639_v28 | 0.9463 |
| Listeria_monocytogenes_1639_v43                          | Listeria_monocytogenes_1639_v28 | 0.9463 |
| Listeria_monocytogenes_1639_v42                          | Listeria_monocytogenes_1639_v28 | 0.9295 |
| Listeria_monocytogenes_1639_v41                          | Listeria_monocytogenes_1639_v28 | 0.9177 |
| Listeria_monocytogenes_1639_v40                          | Listeria_monocytogenes_1639_v28 | 0.968  |
| Listeria_monocytogenes_1639_v3                           | Listeria_monocytogenes_1639_v28 | 0.9183 |
| Listeria_monocytogenes_1639_v39                          | Listeria_monocytogenes_1639_v28 | 0.938  |
| Listeria_monocytogenes_1639_v38                          | Listeria_monocytogenes_1639_v28 | 0.9637 |
| Listeria_monocytogenes_1639_v37                          | Listeria_monocytogenes_1639_v28 | 0.9639 |
| Listeria_monocytogenes_1639_v36                          | Listeria_monocytogenes_1639_v28 | 0.9374 |
| Listeria_monocytogenes_1639_v35                          | Listeria_monocytogenes_1639_v28 | 0.9695 |
| Listeria_monocytogenes_1639_v34                          | Listeria_monocytogenes_1639_v28 | 0.9466 |
| Listeria_monocytogenes_1639_v33                          | Listeria_monocytogenes_1639_v28 | 0.9322 |
| Listeria_monocytogenes_1639_v32                          | Listeria_monocytogenes_1639_v28 | 0.9734 |
| Listeria_monocytogenes_1639_v31                          | Listeria_monocytogenes_1639_v28 | 0.9469 |
| Listeria_monocytogenes_1639_v30                          | Listeria_monocytogenes_1639_v28 | 0.9171 |
| Listeria_monocytogenes_1639_v2                           | Listeria_monocytogenes_1639_v28 | 0.91   |
| Listeria_monocytogenes_1639_v29                          | Listeria_monocytogenes_1639_v28 | 0.9848 |
| Listeria_monocytogenes_1639_v28                          | Listeria_monocytogenes_1639_v28 | 0.0685 |
| Listeria_welshimeri_1643                                 | Listeria_monocytogenes_1639_v29 | 0.8571 |
| Listeria_welshimeri_serovar_6b_str_SLCC5334_386043       | Listeria_monocytogenes_1639_v29 | 0.8568 |
| Listeria_seeligeri_serovar_1_2b_str_SLCC3954_683837      | Listeria_monocytogenes_1639_v29 | 0.8616 |
| Listeria_seeligeri_FSL_S4-171_702452                     | Listeria_monocytogenes_1639_v29 | 0.8057 |
| Listeria_seeligeri_FSL_N1-067_702453                     | Listeria_monocytogenes_1639_v29 | 0.8299 |
| Listeria_seeligeri_1640_v1                               | Listeria_monocytogenes_1639_v29 | 0.8662 |
| Listeria_seeligeri_1640                                  | Listeria_monocytogenes_1639_v29 | 0.8569 |
| Listeria_monocytogenes_WSLC1042_1457188                  | Listeria_monocytogenes_1639_v29 | 0.9116 |
| Listeria_monocytogenes_WSLC1001_1457187                  | Listeria_monocytogenes_1639_v29 | 0.9433 |
| Listeria_monocytogenes_SLCC7179_879090                   | Listeria_monocytogenes_1639_v29 | 0.9342 |
| Listeria_monocytogenes_SLCC5850_882096                   | Listeria_monocytogenes_1639_v29 | 0.9415 |
| Listeria_monocytogenes_SLCC2755_932919                   | Listeria_monocytogenes_1639_v29 | 0.938  |
| Listeria_monocytogenes_SLCC2540_879089                   | Listeria_monocytogenes_1639_v29 | 0.93   |
| Listeria_monocytogenes_SLCC2479_882020                   | Listeria_monocytogenes_1639_v29 | 0.9725 |
| Listeria_monocytogenes_SLCC2378_879088                   | Listeria_monocytogenes_1639_v29 | 0.9126 |
| Listeria_monocytogenes_SLCC2376_882097                   | Listeria_monocytogenes_1639_v29 | 0.9178 |
| Listeria_monocytogenes_SLCC2372_932920                   | Listeria_monocytogenes_1639_v29 | 0.9753 |
| Listeria_monocytogenes_serotype_4b_str_LL195_1230340     | Listeria_monocytogenes_1639_v29 | 0.9165 |
| Listeria_monocytogenes_serotype_4b_str_LIS0087_1134669   | Listeria_monocytogenes_1639_v29 | 0.9212 |
| Listeria_monocytogenes_serotype_4b_str_F2365_265669      | Listeria_monocytogenes_1639_v29 | 0.9165 |
| Listeria_monocytogenes_serotype_4b_str_CLIP_80459_568819 | Listeria_monocytogenes_1639_v29 | 0.919  |
| Listeria_monocytogenes_serotype_4b_str_81-0861_1196161   | Listeria_monocytogenes_1639_v29 | 0.9084 |
| Listeria_monocytogenes_serotype_4b_str_81-0592_1196160   | Listeria_monocytogenes_1639_v29 | 0.9094 |
| Listeria_monocytogenes_serotype_4b_str_81-0558_1196159   | Listeria_monocytogenes_1639_v29 | 0.9098 |
| Listeria_monocytogenes_serotype_4b_str_10-0809_1196162   | Listeria_monocytogenes_1639_v29 | 0.9094 |
| Listeria_monocytogenes_serotype_4b_str_02-6680_1196175   | Listeria_monocytogenes_1639_v29 | 0.9166 |
| Listeria_monocytogenes_serotype_4b_str_02-6679_1196174   | Listeria_monocytogenes_1639_v29 | 0.9166 |
| Listeria_monocytogenes_serotype_4b_str_02-1792_1196173   | Listeria_monocytogenes_1639_v29 | 0.9109 |
| Listeria_monocytogenes_serotype_4b_str_02-1289_1196172   | Listeria_monocytogenes_1639_v29 | 0.9109 |
| Listeria_monocytogenes_serotype_4b_str_02-1103_1196171   | Listeria_monocytogenes_1639_v29 | 0.9109 |
| Listeria_monocytogenes_serotype_3c_str_10-5027_1196195   | Listeria_monocytogenes_1639_v29 | 0.9769 |
| Listeria_monocytogenes_serotype_1_2c_str_10-5026_1196194 | Listeria_monocytogenes_1639_v29 | 0.9777 |
| Listeria_monocytogenes_serotype_1_2c_str_10-5025_1196193 | Listeria_monocytogenes_1639_v29 | 0.9777 |
| Listeria_monocytogenes_serotype_1_2b_str_10-0811_1196164 | Listeria_monocytogenes_1639_v29 | 0.9296 |
| Listeria_monocytogenes_serotype_1_2b_str_10-0810_1196163 | Listeria_monocytogenes_1639_v29 | 0.9296 |
| Listeria_monocytogenes_serotype_1_2a_str_99-6370_1196179 | Listeria_monocytogenes_1639_v29 | 0.9353 |
| Listeria_monocytogenes_serotype_1_2a_str_98-2035_1196178 | Listeria_monocytogenes_1639_v29 | 0.9353 |
| Listeria_monocytogenes_serotype_1_2a_str_95-0093_1196177 | Listeria_monocytogenes_1639_v29 | 0.9393 |
| Listeria_monocytogenes_serotype_1_2a_str_88-0478_1196176 | Listeria_monocytogenes_1639_v29 | 0.9407 |
| Listeria_monocytogenes_serotype_1_2a_str_10-5024_1196192 | Listeria_monocytogenes_1639_v29 | 0.9404 |
| Listeria_monocytogenes_serotype_1_2a_str_10-4758_1196168 | Listeria_monocytogenes_1639_v29 | 0.9442 |
| Listeria_monocytogenes_serotype_1_2a_str_10-4754_1196167 | Listeria_monocytogenes_1639_v29 | 0.9445 |

|                                                          |                                 |        |
|----------------------------------------------------------|---------------------------------|--------|
| Listeria_monocytogenes_serotype_1_2a_str_10-1321_1196191 | Listeria_monocytogenes_1639_v29 | 0.9404 |
| Listeria_monocytogenes_serotype_1_2a_str_10-1047_1196190 | Listeria_monocytogenes_1639_v29 | 0.94   |
| Listeria_monocytogenes_serotype_1_2a_str_10-1046_1196189 | Listeria_monocytogenes_1639_v29 | 0.94   |
| Listeria_monocytogenes_serotype_1_2a_str_10-0934_1196170 | Listeria_monocytogenes_1639_v29 | 0.9412 |
| Listeria_monocytogenes_serotype_1_2a_str_10-0933_1196169 | Listeria_monocytogenes_1639_v29 | 0.9412 |
| Listeria_monocytogenes_serotype_1_2a_str_10-0815_1196188 | Listeria_monocytogenes_1639_v29 | 0.9363 |
| Listeria_monocytogenes_serotype_1_2a_str_10-0814_1196187 | Listeria_monocytogenes_1639_v29 | 0.9404 |
| Listeria_monocytogenes_serotype_1_2a_str_10-0813_1196166 | Listeria_monocytogenes_1639_v29 | 0.9423 |
| Listeria_monocytogenes_serotype_1_2a_str_10-0812_1196165 | Listeria_monocytogenes_1639_v29 | 0.9423 |
| Listeria_monocytogenes_serotype_1_2a_str_08-7669_1196186 | Listeria_monocytogenes_1639_v29 | 0.9342 |
| Listeria_monocytogenes_serotype_1_2a_str_08-7374_1196185 | Listeria_monocytogenes_1639_v29 | 0.9404 |
| Listeria_monocytogenes_serotype_1_2a_str_08-6997_1196184 | Listeria_monocytogenes_1639_v29 | 0.9363 |
| Listeria_monocytogenes_serotype_1_2a_str_08-6569_1196183 | Listeria_monocytogenes_1639_v29 | 0.9363 |
| Listeria_monocytogenes_serotype_1_2a_str_08-6056_1196182 | Listeria_monocytogenes_1639_v29 | 0.9363 |
| Listeria_monocytogenes_serotype_1_2a_str_04-5457_1196181 | Listeria_monocytogenes_1639_v29 | 0.9404 |
| Listeria_monocytogenes_serotype_1_2a_str_02-5993_1196180 | Listeria_monocytogenes_1639_v29 | 0.9404 |
| Listeria_monocytogenes_R479a_1437838                     | Listeria_monocytogenes_1639_v29 | 0.9524 |
| Listeria_monocytogenes_N53-1_1234142                     | Listeria_monocytogenes_1639_v29 | 0.8925 |
| Listeria_monocytogenes_M7_1030009                        | Listeria_monocytogenes_1639_v29 | 0.898  |
| Listeria_monocytogenes_LO28_393132                       | Listeria_monocytogenes_1639_v29 | 0.97   |
| Listeria_monocytogenes_L99_563174                        | Listeria_monocytogenes_1639_v29 | 0.8983 |
| Listeria_monocytogenes_L312_882094                       | Listeria_monocytogenes_1639_v29 | 0.919  |
| Listeria_monocytogenes_J1816_930781                      | Listeria_monocytogenes_1639_v29 | 0.9116 |
| Listeria_monocytogenes_J1-220_930782                     | Listeria_monocytogenes_1639_v29 | 0.9138 |
| Listeria_monocytogenes_J0161_393130                      | Listeria_monocytogenes_1639_v29 | 0.932  |
| Listeria_monocytogenes_HCC23_552536                      | Listeria_monocytogenes_1639_v29 | 0.898  |
| Listeria_monocytogenes_FSL_R2-561_393126                 | Listeria_monocytogenes_1639_v29 | 0.9737 |
| Listeria_monocytogenes_FSL_J1-208_393119                 | Listeria_monocytogenes_1639_v29 | 0.8841 |
| Listeria_monocytogenes_FSL_J1-175_393118                 | Listeria_monocytogenes_1639_v29 | 0.9297 |
| Listeria_monocytogenes_Finland_1998_393127               | Listeria_monocytogenes_1639_v29 | 0.9352 |
| Listeria_monocytogenes_EGD-e_169963_v1                   | Listeria_monocytogenes_1639_v29 | 0.9546 |
| Listeria_monocytogenes_EGD-e_169963                      | Listeria_monocytogenes_1639_v29 | 0.9546 |
| Listeria_monocytogenes_EGD_1334565                       | Listeria_monocytogenes_1639_v29 | 0.9422 |
| Listeria_monocytogenes_CFSAN002349_1299895               | Listeria_monocytogenes_1639_v29 | 0.9196 |
| Listeria_monocytogenes_ATCC_19117_882095_v1              | Listeria_monocytogenes_1639_v29 | 0.9138 |
| Listeria_monocytogenes_ATCC_19117_882095                 | Listeria_monocytogenes_1639_v29 | 0.9134 |
| Listeria_monocytogenes_6179_1288295                      | Listeria_monocytogenes_1639_v29 | 0.9394 |
| Listeria_monocytogenes_1639_v9                           | Listeria_monocytogenes_1639_v29 | 0.9173 |
| Listeria_monocytogenes_1639_v99                          | Listeria_monocytogenes_1639_v29 | 0.9204 |
| Listeria_monocytogenes_1639_v98                          | Listeria_monocytogenes_1639_v29 | 0.9341 |
| Listeria_monocytogenes_1639_v97                          | Listeria_monocytogenes_1639_v29 | 0.915  |
| Listeria_monocytogenes_1639_v96                          | Listeria_monocytogenes_1639_v29 | 0.9212 |
| Listeria_monocytogenes_1639_v95                          | Listeria_monocytogenes_1639_v29 | 0.9212 |
| Listeria_monocytogenes_1639_v94                          | Listeria_monocytogenes_1639_v29 | 0.9215 |
| Listeria_monocytogenes_1639_v93                          | Listeria_monocytogenes_1639_v29 | 0.9374 |
| Listeria_monocytogenes_1639_v92                          | Listeria_monocytogenes_1639_v29 | 0.9204 |
| Listeria_monocytogenes_1639_v91                          | Listeria_monocytogenes_1639_v29 | 0.9163 |
| Listeria_monocytogenes_1639_v90                          | Listeria_monocytogenes_1639_v29 | 0.9341 |
| Listeria_monocytogenes_1639_v8                           | Listeria_monocytogenes_1639_v29 | 0.9583 |
| Listeria_monocytogenes_1639_v89                          | Listeria_monocytogenes_1639_v29 | 0.9154 |
| Listeria_monocytogenes_1639_v88                          | Listeria_monocytogenes_1639_v29 | 0.9479 |
| Listeria_monocytogenes_1639_v87                          | Listeria_monocytogenes_1639_v29 | 0.9404 |
| Listeria_monocytogenes_1639_v86                          | Listeria_monocytogenes_1639_v29 | 0.9401 |
| Listeria_monocytogenes_1639_v85                          | Listeria_monocytogenes_1639_v29 | 0.9085 |
| Listeria_monocytogenes_1639_v84                          | Listeria_monocytogenes_1639_v29 | 0.9463 |
| Listeria_monocytogenes_1639_v83                          | Listeria_monocytogenes_1639_v29 | 0.9093 |
| Listeria_monocytogenes_1639_v82                          | Listeria_monocytogenes_1639_v29 | 0.909  |
| Listeria_monocytogenes_1639_v81                          | Listeria_monocytogenes_1639_v29 | 0.9464 |
| Listeria_monocytogenes_1639_v80                          | Listeria_monocytogenes_1639_v29 | 0.9279 |
| Listeria_monocytogenes_1639_v7                           | Listeria_monocytogenes_1639_v29 | 0.9583 |
| Listeria_monocytogenes_1639_v79                          | Listeria_monocytogenes_1639_v29 | 0.9425 |
| Listeria_monocytogenes_1639_v78                          | Listeria_monocytogenes_1639_v29 | 0.9461 |
| Listeria_monocytogenes_1639_v77                          | Listeria_monocytogenes_1639_v29 | 0.9348 |
| Listeria_monocytogenes_1639_v76                          | Listeria_monocytogenes_1639_v29 | 0.9403 |
| Listeria_monocytogenes_1639_v75                          | Listeria_monocytogenes_1639_v29 | 0.8983 |
| Listeria_monocytogenes_1639_v74                          | Listeria_monocytogenes_1639_v29 | 0.9291 |
| Listeria_monocytogenes_1639_v73                          | Listeria_monocytogenes_1639_v29 | 0.9778 |
| Listeria_monocytogenes_1639_v72                          | Listeria_monocytogenes_1639_v29 | 0.907  |
| Listeria_monocytogenes_1639_v71                          | Listeria_monocytogenes_1639_v29 | 0.9289 |
| Listeria_monocytogenes_1639_v70                          | Listeria_monocytogenes_1639_v29 | 0.9759 |
| Listeria_monocytogenes_1639_v6                           | Listeria_monocytogenes_1639_v29 | 0.958  |
| Listeria_monocytogenes_1639_v69                          | Listeria_monocytogenes_1639_v29 | 0.9094 |
| Listeria_monocytogenes_1639_v68                          | Listeria_monocytogenes_1639_v29 | 0.9332 |
| Listeria_monocytogenes_1639_v67                          | Listeria_monocytogenes_1639_v29 | 0.9306 |
| Listeria_monocytogenes_1639_v66                          | Listeria_monocytogenes_1639_v29 | 0.9439 |
| Listeria_monocytogenes_1639_v65                          | Listeria_monocytogenes_1639_v29 | 0.9376 |
| Listeria_monocytogenes_1639_v64                          | Listeria_monocytogenes_1639_v29 | 0.9384 |
| Listeria_monocytogenes_1639_v63                          | Listeria_monocytogenes_1639_v29 | 0.9387 |
| Listeria_monocytogenes_1639_v62                          | Listeria_monocytogenes_1639_v29 | 0.9401 |
| Listeria_monocytogenes_1639_v61                          | Listeria_monocytogenes_1639_v29 | 0.9409 |
| Listeria_monocytogenes_1639_v60                          | Listeria_monocytogenes_1639_v29 | 0.9343 |
| Listeria_monocytogenes_1639_v5                           | Listeria_monocytogenes_1639_v29 | 0.9118 |
| Listeria_monocytogenes_1639_v59                          | Listeria_monocytogenes_1639_v29 | 0.9133 |
| Listeria_monocytogenes_1639_v58                          | Listeria_monocytogenes_1639_v29 | 0.9129 |
| Listeria_monocytogenes_1639_v57                          | Listeria_monocytogenes_1639_v29 | 0.9092 |
| Listeria_monocytogenes_1639_v56                          | Listeria_monocytogenes_1639_v29 | 0.914  |
| Listeria_monocytogenes_1639_v55                          | Listeria_monocytogenes_1639_v29 | 0.9149 |
| Listeria_monocytogenes_1639_v54                          | Listeria_monocytogenes_1639_v29 | 0.9079 |
| Listeria_monocytogenes_1639_v53                          | Listeria_monocytogenes_1639_v29 | 0.9258 |
| Listeria_monocytogenes_1639_v52                          | Listeria_monocytogenes_1639_v29 | 0.9129 |
| Listeria_monocytogenes_1639_v51                          | Listeria_monocytogenes_1639_v29 | 0.9112 |

|                                                          |                                 |        |
|----------------------------------------------------------|---------------------------------|--------|
| Listeria_monocytogenes_1639_v50                          | Listeria_monocytogenes_1639_v29 | 0.9389 |
| Listeria_monocytogenes_1639_v4                           | Listeria_monocytogenes_1639_v29 | 0.9237 |
| Listeria_monocytogenes_1639_v49                          | Listeria_monocytogenes_1639_v29 | 0.9084 |
| Listeria_monocytogenes_1639_v48                          | Listeria_monocytogenes_1639_v29 | 0.972  |
| Listeria_monocytogenes_1639_v47                          | Listeria_monocytogenes_1639_v29 | 0.9397 |
| Listeria_monocytogenes_1639_v46                          | Listeria_monocytogenes_1639_v29 | 0.9354 |
| Listeria_monocytogenes_1639_v45                          | Listeria_monocytogenes_1639_v29 | 0.9395 |
| Listeria_monocytogenes_1639_v44                          | Listeria_monocytogenes_1639_v29 | 0.9404 |
| Listeria_monocytogenes_1639_v43                          | Listeria_monocytogenes_1639_v29 | 0.9404 |
| Listeria_monocytogenes_1639_v42                          | Listeria_monocytogenes_1639_v29 | 0.9248 |
| Listeria_monocytogenes_1639_v41                          | Listeria_monocytogenes_1639_v29 | 0.921  |
| Listeria_monocytogenes_1639_v40                          | Listeria_monocytogenes_1639_v29 | 0.9686 |
| Listeria_monocytogenes_1639_v3                           | Listeria_monocytogenes_1639_v29 | 0.9244 |
| Listeria_monocytogenes_1639_v39                          | Listeria_monocytogenes_1639_v29 | 0.9332 |
| Listeria_monocytogenes_1639_v38                          | Listeria_monocytogenes_1639_v29 | 0.9603 |
| Listeria_monocytogenes_1639_v37                          | Listeria_monocytogenes_1639_v29 | 0.959  |
| Listeria_monocytogenes_1639_v36                          | Listeria_monocytogenes_1639_v29 | 0.9428 |
| Listeria_monocytogenes_1639_v35                          | Listeria_monocytogenes_1639_v29 | 0.9623 |
| Listeria_monocytogenes_1639_v34                          | Listeria_monocytogenes_1639_v29 | 0.9407 |
| Listeria_monocytogenes_1639_v33                          | Listeria_monocytogenes_1639_v29 | 0.9296 |
| Listeria_monocytogenes_1639_v32                          | Listeria_monocytogenes_1639_v29 | 0.9681 |
| Listeria_monocytogenes_1639_v31                          | Listeria_monocytogenes_1639_v29 | 0.941  |
| Listeria_monocytogenes_1639_v30                          | Listeria_monocytogenes_1639_v29 | 0.9116 |
| Listeria_monocytogenes_1639_v2                           | Listeria_monocytogenes_1639_v29 | 0.9122 |
| Listeria_monocytogenes_1639_v29                          | Listeria_monocytogenes_1639_v29 | 0.0735 |
| Listeria_welshimeri_1643                                 | Listeria_monocytogenes_1639_v2  | 0.8328 |
| Listeria_welshimeri_serovar_6b_str_SLCC5334_386043       | Listeria_monocytogenes_1639_v2  | 0.8322 |
| Listeria_seeligeri_serovar_1_2b_str_SLCC3954_683837      | Listeria_monocytogenes_1639_v2  | 0.8473 |
| Listeria_seeligeri_FSL_S4-171_702452                     | Listeria_monocytogenes_1639_v2  | 0.7931 |
| Listeria_seeligeri_FSL_N1-067_702453                     | Listeria_monocytogenes_1639_v2  | 0.8304 |
| Listeria_seeligeri_1640_v1                               | Listeria_monocytogenes_1639_v2  | 0.8498 |
| Listeria_seeligeri_1640                                  | Listeria_monocytogenes_1639_v2  | 0.8682 |
| Listeria_monocytogenes_WSLC1042_1457188                  | Listeria_monocytogenes_1639_v2  | 0.9027 |
| Listeria_monocytogenes_WSLC1001_1457187                  | Listeria_monocytogenes_1639_v2  | 0.8977 |
| Listeria_monocytogenes_SLCC7179_879090                   | Listeria_monocytogenes_1639_v2  | 0.9066 |
| Listeria_monocytogenes_SLCC5850_882096                   | Listeria_monocytogenes_1639_v2  | 0.8998 |
| Listeria_monocytogenes_SLCC2755_932919                   | Listeria_monocytogenes_1639_v2  | 0.9524 |
| Listeria_monocytogenes_SLCC2540_879089                   | Listeria_monocytogenes_1639_v2  | 0.9074 |
| Listeria_monocytogenes_SLCC2479_882020                   | Listeria_monocytogenes_1639_v2  | 0.8963 |
| Listeria_monocytogenes_SLCC2378_879088                   | Listeria_monocytogenes_1639_v2  | 0.904  |
| Listeria_monocytogenes_SLCC2376_882097                   | Listeria_monocytogenes_1639_v2  | 0.8885 |
| Listeria_monocytogenes_SLCC2372_932920                   | Listeria_monocytogenes_1639_v2  | 0.9041 |
| Listeria_monocytogenes_serotype_4b_str_LL195_1230340     | Listeria_monocytogenes_1639_v2  | 0.9085 |
| Listeria_monocytogenes_serotype_4b_str_LIS0087_1134669   | Listeria_monocytogenes_1639_v2  | 0.8873 |
| Listeria_monocytogenes_serotype_4b_str_F2365_265669      | Listeria_monocytogenes_1639_v2  | 0.9085 |
| Listeria_monocytogenes_serotype_4b_str_CLIP_80459_568819 | Listeria_monocytogenes_1639_v2  | 0.9106 |
| Listeria_monocytogenes_serotype_4b_str_81-0861_1196161   | Listeria_monocytogenes_1639_v2  | 0.9083 |
| Listeria_monocytogenes_serotype_4b_str_81-0592_1196160   | Listeria_monocytogenes_1639_v2  | 0.9093 |
| Listeria_monocytogenes_serotype_4b_str_81-0558_1196159   | Listeria_monocytogenes_1639_v2  | 0.9103 |
| Listeria_monocytogenes_serotype_4b_str_10-0809_1196162   | Listeria_monocytogenes_1639_v2  | 0.9096 |
| Listeria_monocytogenes_serotype_4b_str_02-6680_1196175   | Listeria_monocytogenes_1639_v2  | 0.909  |
| Listeria_monocytogenes_serotype_4b_str_02-6679_1196174   | Listeria_monocytogenes_1639_v2  | 0.909  |
| Listeria_monocytogenes_serotype_4b_str_02-1792_1196173   | Listeria_monocytogenes_1639_v2  | 0.9085 |
| Listeria_monocytogenes_serotype_4b_str_02-1289_1196172   | Listeria_monocytogenes_1639_v2  | 0.9085 |
| Listeria_monocytogenes_serotype_4b_str_02-1103_1196171   | Listeria_monocytogenes_1639_v2  | 0.9085 |
| Listeria_monocytogenes_serotype_3c_str_10-5027_1196195   | Listeria_monocytogenes_1639_v2  | 0.8976 |
| Listeria_monocytogenes_serotype_1_2c_str_10-5026_1196194 | Listeria_monocytogenes_1639_v2  | 0.8984 |
| Listeria_monocytogenes_serotype_1_2c_str_10-5025_1196193 | Listeria_monocytogenes_1639_v2  | 0.8984 |
| Listeria_monocytogenes_serotype_1_2b_str_10-0811_1196164 | Listeria_monocytogenes_1639_v2  | 0.908  |
| Listeria_monocytogenes_serotype_1_2b_str_10-0810_1196163 | Listeria_monocytogenes_1639_v2  | 0.908  |
| Listeria_monocytogenes_serotype_1_2a_str_99-6370_1196179 | Listeria_monocytogenes_1639_v2  | 0.893  |
| Listeria_monocytogenes_serotype_1_2a_str_98-2035_1196178 | Listeria_monocytogenes_1639_v2  | 0.893  |
| Listeria_monocytogenes_serotype_1_2a_str_95-0093_1196177 | Listeria_monocytogenes_1639_v2  | 0.8959 |
| Listeria_monocytogenes_serotype_1_2a_str_88-0478_1196176 | Listeria_monocytogenes_1639_v2  | 0.8965 |
| Listeria_monocytogenes_serotype_1_2a_str_10-5024_1196192 | Listeria_monocytogenes_1639_v2  | 0.8962 |
| Listeria_monocytogenes_serotype_1_2a_str_10-4758_1196168 | Listeria_monocytogenes_1639_v2  | 0.8945 |
| Listeria_monocytogenes_serotype_1_2a_str_10-4754_1196167 | Listeria_monocytogenes_1639_v2  | 0.8945 |
| Listeria_monocytogenes_serotype_1_2a_str_10-1321_1196191 | Listeria_monocytogenes_1639_v2  | 0.8962 |
| Listeria_monocytogenes_serotype_1_2a_str_10-1047_1196190 | Listeria_monocytogenes_1639_v2  | 0.8965 |
| Listeria_monocytogenes_serotype_1_2a_str_10-1046_1196189 | Listeria_monocytogenes_1639_v2  | 0.8965 |
| Listeria_monocytogenes_serotype_1_2a_str_10-0934_1196170 | Listeria_monocytogenes_1639_v2  | 0.9001 |
| Listeria_monocytogenes_serotype_1_2a_str_10-0933_1196169 | Listeria_monocytogenes_1639_v2  | 0.9001 |
| Listeria_monocytogenes_serotype_1_2a_str_10-0815_1196188 | Listeria_monocytogenes_1639_v2  | 0.8935 |
| Listeria_monocytogenes_serotype_1_2a_str_10-0814_1196187 | Listeria_monocytogenes_1639_v2  | 0.8962 |
| Listeria_monocytogenes_serotype_1_2a_str_10-0813_1196166 | Listeria_monocytogenes_1639_v2  | 0.9052 |
| Listeria_monocytogenes_serotype_1_2a_str_10-0812_1196165 | Listeria_monocytogenes_1639_v2  | 0.9052 |
| Listeria_monocytogenes_serotype_1_2a_str_08-7669_1196186 | Listeria_monocytogenes_1639_v2  | 0.902  |
| Listeria_monocytogenes_serotype_1_2a_str_08-7374_1196185 | Listeria_monocytogenes_1639_v2  | 0.8962 |
| Listeria_monocytogenes_serotype_1_2a_str_08-6997_1196184 | Listeria_monocytogenes_1639_v2  | 0.8935 |
| Listeria_monocytogenes_serotype_1_2a_str_08-6569_1196183 | Listeria_monocytogenes_1639_v2  | 0.8935 |
| Listeria_monocytogenes_serotype_1_2a_str_08-6056_1196182 | Listeria_monocytogenes_1639_v2  | 0.8935 |
| Listeria_monocytogenes_serotype_1_2a_str_04-5457_1196181 | Listeria_monocytogenes_1639_v2  | 0.8962 |
| Listeria_monocytogenes_serotype_1_2a_str_02-5993_1196180 | Listeria_monocytogenes_1639_v2  | 0.8959 |
| Listeria_monocytogenes_R479a_1437838                     | Listeria_monocytogenes_1639_v2  | 0.9041 |
| Listeria_monocytogenes_N53-1_1234142                     | Listeria_monocytogenes_1639_v2  | 0.8583 |
| Listeria_monocytogenes_M7_1030009                        | Listeria_monocytogenes_1639_v2  | 0.8737 |
| Listeria_monocytogenes_LO28_393132                       | Listeria_monocytogenes_1639_v2  | 0.8975 |
| Listeria_monocytogenes_L99_563174                        | Listeria_monocytogenes_1639_v2  | 0.8743 |
| Listeria_monocytogenes_L312_882094                       | Listeria_monocytogenes_1639_v2  | 0.911  |
| Listeria_monocytogenes_J1816_930781                      | Listeria_monocytogenes_1639_v2  | 0.9039 |
| Listeria_monocytogenes_J1-220_930782                     | Listeria_monocytogenes_1639_v2  | 0.9011 |

|                                             |                                |        |
|---------------------------------------------|--------------------------------|--------|
| Listeria_monocytogenes_J0161_393130         | Listeria_monocytogenes_1639_v2 | 0.9117 |
| Listeria_monocytogenes_HCC23_552536         | Listeria_monocytogenes_1639_v2 | 0.874  |
| Listeria_monocytogenes_FSL_R2-561_393126    | Listeria_monocytogenes_1639_v2 | 0.8946 |
| Listeria_monocytogenes_FSL_J1-208_393119    | Listeria_monocytogenes_1639_v2 | 0.8673 |
| Listeria_monocytogenes_FSL_J1-175_393118    | Listeria_monocytogenes_1639_v2 | 0.9128 |
| Listeria_monocytogenes_Finland_1998_393127  | Listeria_monocytogenes_1639_v2 | 0.9034 |
| Listeria_monocytogenes_EGD-e_169963_v1      | Listeria_monocytogenes_1639_v2 | 0.9044 |
| Listeria_monocytogenes_EGD-e_169963         | Listeria_monocytogenes_1639_v2 | 0.9047 |
| Listeria_monocytogenes_EGD_1334565          | Listeria_monocytogenes_1639_v2 | 0.9005 |
| Listeria_monocytogenes_CFSAN002349_1299895  | Listeria_monocytogenes_1639_v2 | 0.9102 |
| Listeria_monocytogenes_ATCC_19117_882095_v1 | Listeria_monocytogenes_1639_v2 | 0.9034 |
| Listeria_monocytogenes_ATCC_19117_882095    | Listeria_monocytogenes_1639_v2 | 0.9034 |
| Listeria_monocytogenes_6179_1288295         | Listeria_monocytogenes_1639_v2 | 0.9118 |
| Listeria_monocytogenes_1639_v9              | Listeria_monocytogenes_1639_v2 | 0.9254 |
| Listeria_monocytogenes_1639_v99             | Listeria_monocytogenes_1639_v2 | 0.9153 |
| Listeria_monocytogenes_1639_v98             | Listeria_monocytogenes_1639_v2 | 0.9084 |
| Listeria_monocytogenes_1639_v97             | Listeria_monocytogenes_1639_v2 | 0.914  |
| Listeria_monocytogenes_1639_v96             | Listeria_monocytogenes_1639_v2 | 0.9143 |
| Listeria_monocytogenes_1639_v95             | Listeria_monocytogenes_1639_v2 | 0.9144 |
| Listeria_monocytogenes_1639_v94             | Listeria_monocytogenes_1639_v2 | 0.9147 |
| Listeria_monocytogenes_1639_v93             | Listeria_monocytogenes_1639_v2 | 0.8986 |
| Listeria_monocytogenes_1639_v92             | Listeria_monocytogenes_1639_v2 | 0.9157 |
| Listeria_monocytogenes_1639_v91             | Listeria_monocytogenes_1639_v2 | 0.9084 |
| Listeria_monocytogenes_1639_v90             | Listeria_monocytogenes_1639_v2 | 0.9084 |
| Listeria_monocytogenes_1639_v8              | Listeria_monocytogenes_1639_v2 | 0.9166 |
| Listeria_monocytogenes_1639_v89             | Listeria_monocytogenes_1639_v2 | 0.9147 |
| Listeria_monocytogenes_1639_v88             | Listeria_monocytogenes_1639_v2 | 0.9003 |
| Listeria_monocytogenes_1639_v87             | Listeria_monocytogenes_1639_v2 | 0.9006 |
| Listeria_monocytogenes_1639_v86             | Listeria_monocytogenes_1639_v2 | 0.9003 |
| Listeria_monocytogenes_1639_v85             | Listeria_monocytogenes_1639_v2 | 0.907  |
| Listeria_monocytogenes_1639_v84             | Listeria_monocytogenes_1639_v2 | 0.904  |
| Listeria_monocytogenes_1639_v83             | Listeria_monocytogenes_1639_v2 | 0.9056 |
| Listeria_monocytogenes_1639_v82             | Listeria_monocytogenes_1639_v2 | 0.9053 |
| Listeria_monocytogenes_1639_v81             | Listeria_monocytogenes_1639_v2 | 0.9017 |
| Listeria_monocytogenes_1639_v80             | Listeria_monocytogenes_1639_v2 | 0.9129 |
| Listeria_monocytogenes_1639_v7              | Listeria_monocytogenes_1639_v2 | 0.9166 |
| Listeria_monocytogenes_1639_v79             | Listeria_monocytogenes_1639_v2 | 0.9008 |
| Listeria_monocytogenes_1639_v78             | Listeria_monocytogenes_1639_v2 | 0.9018 |
| Listeria_monocytogenes_1639_v77             | Listeria_monocytogenes_1639_v2 | 0.8985 |
| Listeria_monocytogenes_1639_v76             | Listeria_monocytogenes_1639_v2 | 0.8932 |
| Listeria_monocytogenes_1639_v75             | Listeria_monocytogenes_1639_v2 | 0.8743 |
| Listeria_monocytogenes_1639_v74             | Listeria_monocytogenes_1639_v2 | 0.9231 |
| Listeria_monocytogenes_1639_v73             | Listeria_monocytogenes_1639_v2 | 0.9026 |
| Listeria_monocytogenes_1639_v72             | Listeria_monocytogenes_1639_v2 | 0.9055 |
| Listeria_monocytogenes_1639_v71             | Listeria_monocytogenes_1639_v2 | 0.9173 |
| Listeria_monocytogenes_1639_v70             | Listeria_monocytogenes_1639_v2 | 0.9012 |
| Listeria_monocytogenes_1639_v6              | Listeria_monocytogenes_1639_v2 | 0.916  |
| Listeria_monocytogenes_1639_v69             | Listeria_monocytogenes_1639_v2 | 0.9096 |
| Listeria_monocytogenes_1639_v68             | Listeria_monocytogenes_1639_v2 | 0.9049 |
| Listeria_monocytogenes_1639_v67             | Listeria_monocytogenes_1639_v2 | 0.9174 |
| Listeria_monocytogenes_1639_v66             | Listeria_monocytogenes_1639_v2 | 0.8986 |
| Listeria_monocytogenes_1639_v65             | Listeria_monocytogenes_1639_v2 | 0.898  |
| Listeria_monocytogenes_1639_v64             | Listeria_monocytogenes_1639_v2 | 0.8922 |
| Listeria_monocytogenes_1639_v63             | Listeria_monocytogenes_1639_v2 | 0.9193 |
| Listeria_monocytogenes_1639_v62             | Listeria_monocytogenes_1639_v2 | 0.9007 |
| Listeria_monocytogenes_1639_v61             | Listeria_monocytogenes_1639_v2 | 0.898  |
| Listeria_monocytogenes_1639_v60             | Listeria_monocytogenes_1639_v2 | 0.9117 |
| Listeria_monocytogenes_1639_v5              | Listeria_monocytogenes_1639_v2 | 0.9551 |
| Listeria_monocytogenes_1639_v59             | Listeria_monocytogenes_1639_v2 | 0.8994 |
| Listeria_monocytogenes_1639_v58             | Listeria_monocytogenes_1639_v2 | 0.9084 |
| Listeria_monocytogenes_1639_v57             | Listeria_monocytogenes_1639_v2 | 0.9239 |
| Listeria_monocytogenes_1639_v56             | Listeria_monocytogenes_1639_v2 | 0.9077 |
| Listeria_monocytogenes_1639_v55             | Listeria_monocytogenes_1639_v2 | 0.916  |
| Listeria_monocytogenes_1639_v54             | Listeria_monocytogenes_1639_v2 | 0.888  |
| Listeria_monocytogenes_1639_v53             | Listeria_monocytogenes_1639_v2 | 0.8909 |
| Listeria_monocytogenes_1639_v52             | Listeria_monocytogenes_1639_v2 | 0.9073 |
| Listeria_monocytogenes_1639_v51             | Listeria_monocytogenes_1639_v2 | 0.911  |
| Listeria_monocytogenes_1639_v50             | Listeria_monocytogenes_1639_v2 | 0.8951 |
| Listeria_monocytogenes_1639_v4              | Listeria_monocytogenes_1639_v2 | 0.9451 |
| Listeria_monocytogenes_1639_v49             | Listeria_monocytogenes_1639_v2 | 0.9004 |
| Listeria_monocytogenes_1639_v48             | Listeria_monocytogenes_1639_v2 | 0.8954 |
| Listeria_monocytogenes_1639_v47             | Listeria_monocytogenes_1639_v2 | 0.8969 |
| Listeria_monocytogenes_1639_v46             | Listeria_monocytogenes_1639_v2 | 0.9028 |
| Listeria_monocytogenes_1639_v45             | Listeria_monocytogenes_1639_v2 | 0.9004 |
| Listeria_monocytogenes_1639_v44             | Listeria_monocytogenes_1639_v2 | 0.8962 |
| Listeria_monocytogenes_1639_v43             | Listeria_monocytogenes_1639_v2 | 0.8962 |
| Listeria_monocytogenes_1639_v42             | Listeria_monocytogenes_1639_v2 | 0.8932 |
| Listeria_monocytogenes_1639_v41             | Listeria_monocytogenes_1639_v2 | 0.8951 |
| Listeria_monocytogenes_1639_v40             | Listeria_monocytogenes_1639_v2 | 0.8964 |
| Listeria_monocytogenes_1639_v3              | Listeria_monocytogenes_1639_v2 | 0.9458 |
| Listeria_monocytogenes_1639_v39             | Listeria_monocytogenes_1639_v2 | 0.9146 |
| Listeria_monocytogenes_1639_v38             | Listeria_monocytogenes_1639_v2 | 0.8935 |
| Listeria_monocytogenes_1639_v37             | Listeria_monocytogenes_1639_v2 | 0.9184 |
| Listeria_monocytogenes_1639_v36             | Listeria_monocytogenes_1639_v2 | 0.909  |
| Listeria_monocytogenes_1639_v35             | Listeria_monocytogenes_1639_v2 | 0.8923 |
| Listeria_monocytogenes_1639_v34             | Listeria_monocytogenes_1639_v2 | 0.9014 |
| Listeria_monocytogenes_1639_v33             | Listeria_monocytogenes_1639_v2 | 0.908  |
| Listeria_monocytogenes_1639_v32             | Listeria_monocytogenes_1639_v2 | 0.905  |
| Listeria_monocytogenes_1639_v31             | Listeria_monocytogenes_1639_v2 | 0.9017 |
| Listeria_monocytogenes_1639_v30             | Listeria_monocytogenes_1639_v2 | 0.921  |
| Listeria_monocytogenes_1639_v2              | Listeria_monocytogenes_1639_v2 | 0.0771 |



|                                                          |                                 |        |
|----------------------------------------------------------|---------------------------------|--------|
| Listeria_welshimeri_1643                                 | Listeria_monocytogenes_1639_v30 | 0.8661 |
| Listeria_welshimeri_serovar_6b_str_SLCC5334_386043       | Listeria_monocytogenes_1639_v30 | 0.8655 |
| Listeria_seeligeri_serovar_1_2b_str_SLCC3954_683837      | Listeria_monocytogenes_1639_v30 | 0.8788 |
| Listeria_seeligeri_FSL_S4-171_702452                     | Listeria_monocytogenes_1639_v30 | 0.8131 |
| Listeria_seeligeri_FSL_N1-067_702453                     | Listeria_monocytogenes_1639_v30 | 0.8258 |
| Listeria_seeligeri_1640_v1                               | Listeria_monocytogenes_1639_v30 | 0.8792 |
| Listeria_seeligeri_1640                                  | Listeria_monocytogenes_1639_v30 | 0.8883 |
| Listeria_monocytogenes_WSLC1042_1457188                  | Listeria_monocytogenes_1639_v30 | 0.94   |
| Listeria_monocytogenes_WSLC1001_1457187                  | Listeria_monocytogenes_1639_v30 | 0.9268 |
| Listeria_monocytogenes_SLCC7179_879090                   | Listeria_monocytogenes_1639_v30 | 0.9307 |
| Listeria_monocytogenes_SLCC5850_882096                   | Listeria_monocytogenes_1639_v30 | 0.931  |
| Listeria_monocytogenes_SLCC2755_932919                   | Listeria_monocytogenes_1639_v30 | 0.9371 |
| Listeria_monocytogenes_SLCC2540_879089                   | Listeria_monocytogenes_1639_v30 | 0.9484 |
| Listeria_monocytogenes_SLCC2479_882020                   | Listeria_monocytogenes_1639_v30 | 0.9244 |
| Listeria_monocytogenes_SLCC2378_879088                   | Listeria_monocytogenes_1639_v30 | 0.9411 |
| Listeria_monocytogenes_SLCC2376_882097                   | Listeria_monocytogenes_1639_v30 | 0.9259 |
| Listeria_monocytogenes_SLCC2372_932920                   | Listeria_monocytogenes_1639_v30 | 0.9176 |
| Listeria_monocytogenes_serotype_4b_str_LL195_1230340     | Listeria_monocytogenes_1639_v30 | 0.9445 |
| Listeria_monocytogenes_serotype_4b_str_LIS0087_1134669   | Listeria_monocytogenes_1639_v30 | 0.9077 |
| Listeria_monocytogenes_serotype_4b_str_F2365_265669      | Listeria_monocytogenes_1639_v30 | 0.9445 |
| Listeria_monocytogenes_serotype_4b_str_CLIP_80459_568819 | Listeria_monocytogenes_1639_v30 | 0.9452 |
| Listeria_monocytogenes_serotype_4b_str_81-0861_1196161   | Listeria_monocytogenes_1639_v30 | 0.9324 |
| Listeria_monocytogenes_serotype_4b_str_81-0592_1196160   | Listeria_monocytogenes_1639_v30 | 0.9335 |
| Listeria_monocytogenes_serotype_4b_str_81-0558_1196159   | Listeria_monocytogenes_1639_v30 | 0.9327 |
| Listeria_monocytogenes_serotype_4b_str_10-0809_1196162   | Listeria_monocytogenes_1639_v30 | 0.9335 |
| Listeria_monocytogenes_serotype_4b_str_02-6680_1196175   | Listeria_monocytogenes_1639_v30 | 0.9453 |
| Listeria_monocytogenes_serotype_4b_str_02-6679_1196174   | Listeria_monocytogenes_1639_v30 | 0.9453 |
| Listeria_monocytogenes_serotype_4b_str_02-1792_1196173   | Listeria_monocytogenes_1639_v30 | 0.9342 |
| Listeria_monocytogenes_serotype_4b_str_02-1289_1196172   | Listeria_monocytogenes_1639_v30 | 0.9342 |
| Listeria_monocytogenes_serotype_4b_str_02-1103_1196171   | Listeria_monocytogenes_1639_v30 | 0.9342 |
| Listeria_monocytogenes_serotype_3c_str_10-5027_1196195   | Listeria_monocytogenes_1639_v30 | 0.9251 |
| Listeria_monocytogenes_serotype_1_2c_str_10-5026_1196194 | Listeria_monocytogenes_1639_v30 | 0.9262 |
| Listeria_monocytogenes_serotype_1_2c_str_10-5025_1196193 | Listeria_monocytogenes_1639_v30 | 0.9262 |
| Listeria_monocytogenes_serotype_1_2b_str_10-0811_1196164 | Listeria_monocytogenes_1639_v30 | 0.949  |
| Listeria_monocytogenes_serotype_1_2b_str_10-0810_1196163 | Listeria_monocytogenes_1639_v30 | 0.949  |
| Listeria_monocytogenes_serotype_1_2a_str_99-6370_1196179 | Listeria_monocytogenes_1639_v30 | 0.9187 |
| Listeria_monocytogenes_serotype_1_2a_str_98-2035_1196178 | Listeria_monocytogenes_1639_v30 | 0.9187 |
| Listeria_monocytogenes_serotype_1_2a_str_95-0093_1196177 | Listeria_monocytogenes_1639_v30 | 0.9157 |
| Listeria_monocytogenes_serotype_1_2a_str_88-0478_1196176 | Listeria_monocytogenes_1639_v30 | 0.9134 |
| Listeria_monocytogenes_serotype_1_2a_str_10-5024_1196192 | Listeria_monocytogenes_1639_v30 | 0.916  |
| Listeria_monocytogenes_serotype_1_2a_str_10-4758_1196168 | Listeria_monocytogenes_1639_v30 | 0.9337 |
| Listeria_monocytogenes_serotype_1_2a_str_10-4754_1196167 | Listeria_monocytogenes_1639_v30 | 0.9337 |
| Listeria_monocytogenes_serotype_1_2a_str_10-1321_1196191 | Listeria_monocytogenes_1639_v30 | 0.916  |
| Listeria_monocytogenes_serotype_1_2a_str_10-1047_1196190 | Listeria_monocytogenes_1639_v30 | 0.9156 |
| Listeria_monocytogenes_serotype_1_2a_str_10-1046_1196189 | Listeria_monocytogenes_1639_v30 | 0.9156 |
| Listeria_monocytogenes_serotype_1_2a_str_10-0934_1196170 | Listeria_monocytogenes_1639_v30 | 0.937  |
| Listeria_monocytogenes_serotype_1_2a_str_10-0933_1196169 | Listeria_monocytogenes_1639_v30 | 0.937  |
| Listeria_monocytogenes_serotype_1_2a_str_10-0815_1196188 | Listeria_monocytogenes_1639_v30 | 0.9201 |
| Listeria_monocytogenes_serotype_1_2a_str_10-0814_1196187 | Listeria_monocytogenes_1639_v30 | 0.916  |
| Listeria_monocytogenes_serotype_1_2a_str_10-0813_1196166 | Listeria_monocytogenes_1639_v30 | 0.9237 |
| Listeria_monocytogenes_serotype_1_2a_str_10-0812_1196165 | Listeria_monocytogenes_1639_v30 | 0.9237 |
| Listeria_monocytogenes_serotype_1_2a_str_08-7669_1196186 | Listeria_monocytogenes_1639_v30 | 0.9222 |
| Listeria_monocytogenes_serotype_1_2a_str_08-7374_1196185 | Listeria_monocytogenes_1639_v30 | 0.916  |
| Listeria_monocytogenes_serotype_1_2a_str_08-6997_1196184 | Listeria_monocytogenes_1639_v30 | 0.9201 |
| Listeria_monocytogenes_serotype_1_2a_str_08-6569_1196183 | Listeria_monocytogenes_1639_v30 | 0.9201 |
| Listeria_monocytogenes_serotype_1_2a_str_08-6056_1196182 | Listeria_monocytogenes_1639_v30 | 0.9201 |
| Listeria_monocytogenes_serotype_1_2a_str_04-5457_1196181 | Listeria_monocytogenes_1639_v30 | 0.916  |
| Listeria_monocytogenes_serotype_1_2a_str_02-5993_1196180 | Listeria_monocytogenes_1639_v30 | 0.9157 |
| Listeria_monocytogenes_R479a_1437838                     | Listeria_monocytogenes_1639_v30 | 0.9146 |
| Listeria_monocytogenes_N53-1_1234142                     | Listeria_monocytogenes_1639_v30 | 0.885  |
| Listeria_monocytogenes_M7_1030009                        | Listeria_monocytogenes_1639_v30 | 0.8926 |
| Listeria_monocytogenes_LO28_393132                       | Listeria_monocytogenes_1639_v30 | 0.923  |
| Listeria_monocytogenes_L99_563174                        | Listeria_monocytogenes_1639_v30 | 0.8933 |
| Listeria_monocytogenes_L312_882094                       | Listeria_monocytogenes_1639_v30 | 0.9455 |
| Listeria_monocytogenes_J1816_930781                      | Listeria_monocytogenes_1639_v30 | 0.9297 |
| Listeria_monocytogenes_J1-220_930782                     | Listeria_monocytogenes_1639_v30 | 0.9285 |
| Listeria_monocytogenes_J0161_393130                      | Listeria_monocytogenes_1639_v30 | 0.9244 |
| Listeria_monocytogenes_HCC23_552536                      | Listeria_monocytogenes_1639_v30 | 0.8926 |
| Listeria_monocytogenes_FSL_R2-561_393126                 | Listeria_monocytogenes_1639_v30 | 0.9241 |
| Listeria_monocytogenes_FSL_J1-208_393119                 | Listeria_monocytogenes_1639_v30 | 0.8972 |
| Listeria_monocytogenes_FSL_J1-175_393118                 | Listeria_monocytogenes_1639_v30 | 0.9546 |
| Listeria_monocytogenes_Finland_1998_393127               | Listeria_monocytogenes_1639_v30 | 0.9385 |
| Listeria_monocytogenes_EGD-e_169963_v1                   | Listeria_monocytogenes_1639_v30 | 0.9327 |
| Listeria_monocytogenes_EGD-e_169963                      | Listeria_monocytogenes_1639_v30 | 0.9331 |
| Listeria_monocytogenes_EGD_1334565                       | Listeria_monocytogenes_1639_v30 | 0.9317 |
| Listeria_monocytogenes_CFSAN002349_1299895               | Listeria_monocytogenes_1639_v30 | 0.9495 |
| Listeria_monocytogenes_ATCC_19117_882095_v1              | Listeria_monocytogenes_1639_v30 | 0.9443 |
| Listeria_monocytogenes_ATCC_19117_882095                 | Listeria_monocytogenes_1639_v30 | 0.9443 |
| Listeria_monocytogenes_6179_1288295                      | Listeria_monocytogenes_1639_v30 | 0.9116 |
| Listeria_monocytogenes_1639_v9                           | Listeria_monocytogenes_1639_v30 | 0.9472 |
| Listeria_monocytogenes_1639_v99                          | Listeria_monocytogenes_1639_v30 | 0.9308 |
| Listeria_monocytogenes_1639_v98                          | Listeria_monocytogenes_1639_v30 | 0.9303 |
| Listeria_monocytogenes_1639_v97                          | Listeria_monocytogenes_1639_v30 | 0.9362 |
| Listeria_monocytogenes_1639_v96                          | Listeria_monocytogenes_1639_v30 | 0.9298 |
| Listeria_monocytogenes_1639_v95                          | Listeria_monocytogenes_1639_v30 | 0.9298 |
| Listeria_monocytogenes_1639_v94                          | Listeria_monocytogenes_1639_v30 | 0.9298 |
| Listeria_monocytogenes_1639_v93                          | Listeria_monocytogenes_1639_v30 | 0.9185 |
| Listeria_monocytogenes_1639_v92                          | Listeria_monocytogenes_1639_v30 | 0.9308 |
| Listeria_monocytogenes_1639_v91                          | Listeria_monocytogenes_1639_v30 | 0.9278 |
| Listeria_monocytogenes_1639_v90                          | Listeria_monocytogenes_1639_v30 | 0.9303 |
| Listeria_monocytogenes_1639_v8                           | Listeria_monocytogenes_1639_v30 | 0.9057 |

|                                                          |                                 |        |
|----------------------------------------------------------|---------------------------------|--------|
| Listeria_monocytogenes_1639_v89                          | Listeria_monocytogenes_1639_v30 | 0.9423 |
| Listeria_monocytogenes_1639_v88                          | Listeria_monocytogenes_1639_v30 | 0.9242 |
| Listeria_monocytogenes_1639_v87                          | Listeria_monocytogenes_1639_v30 | 0.92   |
| Listeria_monocytogenes_1639_v86                          | Listeria_monocytogenes_1639_v30 | 0.9193 |
| Listeria_monocytogenes_1639_v85                          | Listeria_monocytogenes_1639_v30 | 0.9321 |
| Listeria_monocytogenes_1639_v84                          | Listeria_monocytogenes_1639_v30 | 0.9251 |
| Listeria_monocytogenes_1639_v83                          | Listeria_monocytogenes_1639_v30 | 0.9356 |
| Listeria_monocytogenes_1639_v82                          | Listeria_monocytogenes_1639_v30 | 0.9349 |
| Listeria_monocytogenes_1639_v81                          | Listeria_monocytogenes_1639_v30 | 0.9241 |
| Listeria_monocytogenes_1639_v80                          | Listeria_monocytogenes_1639_v30 | 0.9448 |
| Listeria_monocytogenes_1639_v7                           | Listeria_monocytogenes_1639_v30 | 0.9057 |
| Listeria_monocytogenes_1639_v79                          | Listeria_monocytogenes_1639_v30 | 0.9232 |
| Listeria_monocytogenes_1639_v78                          | Listeria_monocytogenes_1639_v30 | 0.9238 |
| Listeria_monocytogenes_1639_v77                          | Listeria_monocytogenes_1639_v30 | 0.9213 |
| Listeria_monocytogenes_1639_v76                          | Listeria_monocytogenes_1639_v30 | 0.9281 |
| Listeria_monocytogenes_1639_v75                          | Listeria_monocytogenes_1639_v30 | 0.8933 |
| Listeria_monocytogenes_1639_v74                          | Listeria_monocytogenes_1639_v30 | 0.916  |
| Listeria_monocytogenes_1639_v73                          | Listeria_monocytogenes_1639_v30 | 0.9182 |
| Listeria_monocytogenes_1639_v72                          | Listeria_monocytogenes_1639_v30 | 0.9341 |
| Listeria_monocytogenes_1639_v71                          | Listeria_monocytogenes_1639_v30 | 0.91   |
| Listeria_monocytogenes_1639_v70                          | Listeria_monocytogenes_1639_v30 | 0.9217 |
| Listeria_monocytogenes_1639_v6                           | Listeria_monocytogenes_1639_v30 | 0.9051 |
| Listeria_monocytogenes_1639_v69                          | Listeria_monocytogenes_1639_v30 | 0.9339 |
| Listeria_monocytogenes_1639_v68                          | Listeria_monocytogenes_1639_v30 | 0.9282 |
| Listeria_monocytogenes_1639_v67                          | Listeria_monocytogenes_1639_v30 | 0.9468 |
| Listeria_monocytogenes_1639_v66                          | Listeria_monocytogenes_1639_v30 | 0.9312 |
| Listeria_monocytogenes_1639_v65                          | Listeria_monocytogenes_1639_v30 | 0.9272 |
| Listeria_monocytogenes_1639_v64                          | Listeria_monocytogenes_1639_v30 | 0.9358 |
| Listeria_monocytogenes_1639_v63                          | Listeria_monocytogenes_1639_v30 | 0.9401 |
| Listeria_monocytogenes_1639_v62                          | Listeria_monocytogenes_1639_v30 | 0.9282 |
| Listeria_monocytogenes_1639_v61                          | Listeria_monocytogenes_1639_v30 | 0.9183 |
| Listeria_monocytogenes_1639_v60                          | Listeria_monocytogenes_1639_v30 | 0.9252 |
| Listeria_monocytogenes_1639_v5                           | Listeria_monocytogenes_1639_v30 | 0.9349 |
| Listeria_monocytogenes_1639_v59                          | Listeria_monocytogenes_1639_v30 | 0.9356 |
| Listeria_monocytogenes_1639_v58                          | Listeria_monocytogenes_1639_v30 | 0.939  |
| Listeria_monocytogenes_1639_v57                          | Listeria_monocytogenes_1639_v30 | 0.9462 |
| Listeria_monocytogenes_1639_v56                          | Listeria_monocytogenes_1639_v30 | 0.9364 |
| Listeria_monocytogenes_1639_v55                          | Listeria_monocytogenes_1639_v30 | 0.9233 |
| Listeria_monocytogenes_1639_v54                          | Listeria_monocytogenes_1639_v30 | 0.9097 |
| Listeria_monocytogenes_1639_v53                          | Listeria_monocytogenes_1639_v30 | 0.9271 |
| Listeria_monocytogenes_1639_v52                          | Listeria_monocytogenes_1639_v30 | 0.9306 |
| Listeria_monocytogenes_1639_v51                          | Listeria_monocytogenes_1639_v30 | 0.9301 |
| Listeria_monocytogenes_1639_v50                          | Listeria_monocytogenes_1639_v30 | 0.9153 |
| Listeria_monocytogenes_1639_v4                           | Listeria_monocytogenes_1639_v30 | 0.9477 |
| Listeria_monocytogenes_1639_v49                          | Listeria_monocytogenes_1639_v30 | 0.932  |
| Listeria_monocytogenes_1639_v48                          | Listeria_monocytogenes_1639_v30 | 0.9289 |
| Listeria_monocytogenes_1639_v47                          | Listeria_monocytogenes_1639_v30 | 0.9149 |
| Listeria_monocytogenes_1639_v46                          | Listeria_monocytogenes_1639_v30 | 0.9286 |
| Listeria_monocytogenes_1639_v45                          | Listeria_monocytogenes_1639_v30 | 0.9074 |
| Listeria_monocytogenes_1639_v44                          | Listeria_monocytogenes_1639_v30 | 0.916  |
| Listeria_monocytogenes_1639_v43                          | Listeria_monocytogenes_1639_v30 | 0.916  |
| Listeria_monocytogenes_1639_v42                          | Listeria_monocytogenes_1639_v30 | 0.9227 |
| Listeria_monocytogenes_1639_v41                          | Listeria_monocytogenes_1639_v30 | 0.9029 |
| Listeria_monocytogenes_1639_v40                          | Listeria_monocytogenes_1639_v30 | 0.9322 |
| Listeria_monocytogenes_1639_v3                           | Listeria_monocytogenes_1639_v30 | 0.948  |
| Listeria_monocytogenes_1639_v39                          | Listeria_monocytogenes_1639_v30 | 0.9438 |
| Listeria_monocytogenes_1639_v38                          | Listeria_monocytogenes_1639_v30 | 0.9232 |
| Listeria_monocytogenes_1639_v37                          | Listeria_monocytogenes_1639_v30 | 0.9372 |
| Listeria_monocytogenes_1639_v36                          | Listeria_monocytogenes_1639_v30 | 0.9215 |
| Listeria_monocytogenes_1639_v35                          | Listeria_monocytogenes_1639_v30 | 0.9329 |
| Listeria_monocytogenes_1639_v34                          | Listeria_monocytogenes_1639_v30 | 0.9248 |
| Listeria_monocytogenes_1639_v33                          | Listeria_monocytogenes_1639_v30 | 0.949  |
| Listeria_monocytogenes_1639_v32                          | Listeria_monocytogenes_1639_v30 | 0.9156 |
| Listeria_monocytogenes_1639_v31                          | Listeria_monocytogenes_1639_v30 | 0.9251 |
| Listeria_monocytogenes_1639_v30                          | Listeria_monocytogenes_1639_v30 | 0.0677 |
| Listeria_welshimeri_1643                                 | Listeria_monocytogenes_1639_v31 | 0.8744 |
| Listeria_welshimeri_serovar_6b_str_SLCC5334_386043       | Listeria_monocytogenes_1639_v31 | 0.8738 |
| Listeria_seeligeri_serovar_1_2b_str_SLCC3954_683837      | Listeria_monocytogenes_1639_v31 | 0.8788 |
| Listeria_seeligeri_FSL_S4-171_702452                     | Listeria_monocytogenes_1639_v31 | 0.8152 |
| Listeria_seeligeri_FSL_N1-067_702453                     | Listeria_monocytogenes_1639_v31 | 0.836  |
| Listeria_seeligeri_1640_v1                               | Listeria_monocytogenes_1639_v31 | 0.8747 |
| Listeria_seeligeri_1640                                  | Listeria_monocytogenes_1639_v31 | 0.8715 |
| Listeria_monocytogenes_WSLC1042_1457188                  | Listeria_monocytogenes_1639_v31 | 0.9286 |
| Listeria_monocytogenes_WSLC1001_1457187                  | Listeria_monocytogenes_1639_v31 | 0.9509 |
| Listeria_monocytogenes_SLCC7179_879090                   | Listeria_monocytogenes_1639_v31 | 0.9478 |
| Listeria_monocytogenes_SLCC5850_882096                   | Listeria_monocytogenes_1639_v31 | 0.9521 |
| Listeria_monocytogenes_SLCC2755_932919                   | Listeria_monocytogenes_1639_v31 | 0.9262 |
| Listeria_monocytogenes_SLCC2540_879089                   | Listeria_monocytogenes_1639_v31 | 0.9397 |
| Listeria_monocytogenes_SLCC2479_882020                   | Listeria_monocytogenes_1639_v31 | 0.953  |
| Listeria_monocytogenes_SLCC2378_879088                   | Listeria_monocytogenes_1639_v31 | 0.93   |
| Listeria_monocytogenes_SLCC2376_882097                   | Listeria_monocytogenes_1639_v31 | 0.9242 |
| Listeria_monocytogenes_SLCC2372_932920                   | Listeria_monocytogenes_1639_v31 | 0.9468 |
| Listeria_monocytogenes_serotype_4b_str_LL195_1230340     | Listeria_monocytogenes_1639_v31 | 0.9258 |
| Listeria_monocytogenes_serotype_4b_str_LIS0087_1134669   | Listeria_monocytogenes_1639_v31 | 0.9317 |
| Listeria_monocytogenes_serotype_4b_str_F2365_265669      | Listeria_monocytogenes_1639_v31 | 0.9258 |
| Listeria_monocytogenes_serotype_4b_str_CLIP_80459_568819 | Listeria_monocytogenes_1639_v31 | 0.9325 |
| Listeria_monocytogenes_serotype_4b_str_81-0861_1196161   | Listeria_monocytogenes_1639_v31 | 0.9256 |
| Listeria_monocytogenes_serotype_4b_str_81-0592_1196160   | Listeria_monocytogenes_1639_v31 | 0.9267 |
| Listeria_monocytogenes_serotype_4b_str_81-0558_1196159   | Listeria_monocytogenes_1639_v31 | 0.9274 |
| Listeria_monocytogenes_serotype_4b_str_10-0809_1196162   | Listeria_monocytogenes_1639_v31 | 0.9267 |
| Listeria_monocytogenes_serotype_4b_str_02-6680_1196175   | Listeria_monocytogenes_1639_v31 | 0.9285 |

|                                                          |                                 |        |
|----------------------------------------------------------|---------------------------------|--------|
| Listeria_monocytogenes_serotype_4b_str_02-6679_1196174   | Listeria_monocytogenes_1639_v31 | 0.9285 |
| Listeria_monocytogenes_serotype_4b_str_02-1792_1196173   | Listeria_monocytogenes_1639_v31 | 0.9281 |
| Listeria_monocytogenes_serotype_4b_str_02-1289_1196172   | Listeria_monocytogenes_1639_v31 | 0.9281 |
| Listeria_monocytogenes_serotype_4b_str_02-1103_1196171   | Listeria_monocytogenes_1639_v31 | 0.9281 |
| Listeria_monocytogenes_serotype_3c_str_10-5027_1196195   | Listeria_monocytogenes_1639_v31 | 0.953  |
| Listeria_monocytogenes_serotype_1_2c_str_10-5026_1196194 | Listeria_monocytogenes_1639_v31 | 0.9541 |
| Listeria_monocytogenes_serotype_1_2c_str_10-5025_1196193 | Listeria_monocytogenes_1639_v31 | 0.9541 |
| Listeria_monocytogenes_serotype_1_2b_str_10-0811_1196164 | Listeria_monocytogenes_1639_v31 | 0.9323 |
| Listeria_monocytogenes_serotype_1_2b_str_10-0810_1196163 | Listeria_monocytogenes_1639_v31 | 0.9323 |
| Listeria_monocytogenes_serotype_1_2a_str_99-6370_1196179 | Listeria_monocytogenes_1639_v31 | 0.9427 |
| Listeria_monocytogenes_serotype_1_2a_str_98-2035_1196178 | Listeria_monocytogenes_1639_v31 | 0.9427 |
| Listeria_monocytogenes_serotype_1_2a_str_95-0093_1196177 | Listeria_monocytogenes_1639_v31 | 0.9467 |
| Listeria_monocytogenes_serotype_1_2a_str_88-0478_1196176 | Listeria_monocytogenes_1639_v31 | 0.9471 |
| Listeria_monocytogenes_serotype_1_2a_str_10-5024_1196192 | Listeria_monocytogenes_1639_v31 | 0.9467 |
| Listeria_monocytogenes_serotype_1_2a_str_10-4758_1196168 | Listeria_monocytogenes_1639_v31 | 0.9552 |
| Listeria_monocytogenes_serotype_1_2a_str_10-4754_1196167 | Listeria_monocytogenes_1639_v31 | 0.9552 |
| Listeria_monocytogenes_serotype_1_2a_str_10-1321_1196191 | Listeria_monocytogenes_1639_v31 | 0.9467 |
| Listeria_monocytogenes_serotype_1_2a_str_10-1047_1196190 | Listeria_monocytogenes_1639_v31 | 0.9471 |
| Listeria_monocytogenes_serotype_1_2a_str_10-1046_1196189 | Listeria_monocytogenes_1639_v31 | 0.9471 |
| Listeria_monocytogenes_serotype_1_2a_str_10-0934_1196170 | Listeria_monocytogenes_1639_v31 | 0.9489 |
| Listeria_monocytogenes_serotype_1_2a_str_10-0933_1196169 | Listeria_monocytogenes_1639_v31 | 0.9489 |
| Listeria_monocytogenes_serotype_1_2a_str_10-0815_1196188 | Listeria_monocytogenes_1639_v31 | 0.9426 |
| Listeria_monocytogenes_serotype_1_2a_str_10-0814_1196187 | Listeria_monocytogenes_1639_v31 | 0.9467 |
| Listeria_monocytogenes_serotype_1_2a_str_10-0813_1196166 | Listeria_monocytogenes_1639_v31 | 0.9514 |
| Listeria_monocytogenes_serotype_1_2a_str_10-0812_1196165 | Listeria_monocytogenes_1639_v31 | 0.9514 |
| Listeria_monocytogenes_serotype_1_2a_str_08-7669_1196186 | Listeria_monocytogenes_1639_v31 | 0.9447 |
| Listeria_monocytogenes_serotype_1_2a_str_08-7374_1196185 | Listeria_monocytogenes_1639_v31 | 0.9467 |
| Listeria_monocytogenes_serotype_1_2a_str_08-6997_1196184 | Listeria_monocytogenes_1639_v31 | 0.9426 |
| Listeria_monocytogenes_serotype_1_2a_str_08-6569_1196183 | Listeria_monocytogenes_1639_v31 | 0.9426 |
| Listeria_monocytogenes_serotype_1_2a_str_08-6056_1196182 | Listeria_monocytogenes_1639_v31 | 0.9426 |
| Listeria_monocytogenes_serotype_1_2a_str_04-5457_1196181 | Listeria_monocytogenes_1639_v31 | 0.9467 |
| Listeria_monocytogenes_serotype_1_2a_str_02-5993_1196180 | Listeria_monocytogenes_1639_v31 | 0.9464 |
| Listeria_monocytogenes_R479a_1437838                     | Listeria_monocytogenes_1639_v31 | 0.9435 |
| Listeria_monocytogenes_N53-1_1234142                     | Listeria_monocytogenes_1639_v31 | 0.8994 |
| Listeria_monocytogenes_M7_1030009                        | Listeria_monocytogenes_1639_v31 | 0.9087 |
| Listeria_monocytogenes_LO28_393132                       | Listeria_monocytogenes_1639_v31 | 0.9465 |
| Listeria_monocytogenes_L99_563174                        | Listeria_monocytogenes_1639_v31 | 0.9094 |
| Listeria_monocytogenes_L312_882094                       | Listeria_monocytogenes_1639_v31 | 0.9325 |
| Listeria_monocytogenes_J1816_930781                      | Listeria_monocytogenes_1639_v31 | 0.9203 |
| Listeria_monocytogenes_J1-220_930782                     | Listeria_monocytogenes_1639_v31 | 0.9313 |
| Listeria_monocytogenes_J0161_393130                      | Listeria_monocytogenes_1639_v31 | 0.9675 |
| Listeria_monocytogenes_HCC23_552536                      | Listeria_monocytogenes_1639_v31 | 0.909  |
| Listeria_monocytogenes_FSL_R2-561_393126                 | Listeria_monocytogenes_1639_v31 | 0.9509 |
| Listeria_monocytogenes_FSL_J1-208_393119                 | Listeria_monocytogenes_1639_v31 | 0.8945 |
| Listeria_monocytogenes_FSL_J1-175_393118                 | Listeria_monocytogenes_1639_v31 | 0.9383 |
| Listeria_monocytogenes_Finland_1998_393127               | Listeria_monocytogenes_1639_v31 | 0.9516 |
| Listeria_monocytogenes_EGD-e_169963_v1                   | Listeria_monocytogenes_1639_v31 | 0.9482 |
| Listeria_monocytogenes_EGD-e_169963                      | Listeria_monocytogenes_1639_v31 | 0.9485 |
| Listeria_monocytogenes_EGD_1334565                       | Listeria_monocytogenes_1639_v31 | 0.9525 |
| Listeria_monocytogenes_CFSAN002349_1299895               | Listeria_monocytogenes_1639_v31 | 0.9282 |
| Listeria_monocytogenes_ATCC_19117_882095_v1              | Listeria_monocytogenes_1639_v31 | 0.9343 |
| Listeria_monocytogenes_ATCC_19117_882095                 | Listeria_monocytogenes_1639_v31 | 0.9343 |
| Listeria_monocytogenes_6179_1288295                      | Listeria_monocytogenes_1639_v31 | 0.9527 |
| Listeria_monocytogenes_1639_v9                           | Listeria_monocytogenes_1639_v31 | 0.9252 |
| Listeria_monocytogenes_1639_v99                          | Listeria_monocytogenes_1639_v31 | 0.9222 |
| Listeria_monocytogenes_1639_v98                          | Listeria_monocytogenes_1639_v31 | 0.9468 |
| Listeria_monocytogenes_1639_v97                          | Listeria_monocytogenes_1639_v31 | 0.9283 |
| Listeria_monocytogenes_1639_v96                          | Listeria_monocytogenes_1639_v31 | 0.9208 |
| Listeria_monocytogenes_1639_v95                          | Listeria_monocytogenes_1639_v31 | 0.9208 |
| Listeria_monocytogenes_1639_v94                          | Listeria_monocytogenes_1639_v31 | 0.9211 |
| Listeria_monocytogenes_1639_v93                          | Listeria_monocytogenes_1639_v31 | 0.9434 |
| Listeria_monocytogenes_1639_v92                          | Listeria_monocytogenes_1639_v31 | 0.9229 |
| Listeria_monocytogenes_1639_v91                          | Listeria_monocytogenes_1639_v31 | 0.9243 |
| Listeria_monocytogenes_1639_v90                          | Listeria_monocytogenes_1639_v31 | 0.9468 |
| Listeria_monocytogenes_1639_v8                           | Listeria_monocytogenes_1639_v31 | 0.9361 |
| Listeria_monocytogenes_1639_v89                          | Listeria_monocytogenes_1639_v31 | 0.928  |
| Listeria_monocytogenes_1639_v88                          | Listeria_monocytogenes_1639_v31 | 0.9526 |
| Listeria_monocytogenes_1639_v87                          | Listeria_monocytogenes_1639_v31 | 0.9461 |
| Listeria_monocytogenes_1639_v86                          | Listeria_monocytogenes_1639_v31 | 0.9454 |
| Listeria_monocytogenes_1639_v85                          | Listeria_monocytogenes_1639_v31 | 0.9261 |
| Listeria_monocytogenes_1639_v84                          | Listeria_monocytogenes_1639_v31 | 0.955  |
| Listeria_monocytogenes_1639_v83                          | Listeria_monocytogenes_1639_v31 | 0.9299 |
| Listeria_monocytogenes_1639_v82                          | Listeria_monocytogenes_1639_v31 | 0.9292 |
| Listeria_monocytogenes_1639_v81                          | Listeria_monocytogenes_1639_v31 | 0.9577 |
| Listeria_monocytogenes_1639_v80                          | Listeria_monocytogenes_1639_v31 | 0.9353 |
| Listeria_monocytogenes_1639_v7                           | Listeria_monocytogenes_1639_v31 | 0.9361 |
| Listeria_monocytogenes_1639_v79                          | Listeria_monocytogenes_1639_v31 | 0.9552 |
| Listeria_monocytogenes_1639_v78                          | Listeria_monocytogenes_1639_v31 | 0.9574 |
| Listeria_monocytogenes_1639_v77                          | Listeria_monocytogenes_1639_v31 | 0.9479 |
| Listeria_monocytogenes_1639_v76                          | Listeria_monocytogenes_1639_v31 | 0.9518 |
| Listeria_monocytogenes_1639_v75                          | Listeria_monocytogenes_1639_v31 | 0.9094 |
| Listeria_monocytogenes_1639_v74                          | Listeria_monocytogenes_1639_v31 | 0.9299 |
| Listeria_monocytogenes_1639_v73                          | Listeria_monocytogenes_1639_v31 | 0.9434 |
| Listeria_monocytogenes_1639_v72                          | Listeria_monocytogenes_1639_v31 | 0.9287 |
| Listeria_monocytogenes_1639_v71                          | Listeria_monocytogenes_1639_v31 | 0.9458 |
| Listeria_monocytogenes_1639_v70                          | Listeria_monocytogenes_1639_v31 | 0.9521 |
| Listeria_monocytogenes_1639_v6                           | Listeria_monocytogenes_1639_v31 | 0.9354 |
| Listeria_monocytogenes_1639_v69                          | Listeria_monocytogenes_1639_v31 | 0.927  |
| Listeria_monocytogenes_1639_v68                          | Listeria_monocytogenes_1639_v31 | 0.9789 |
| Listeria_monocytogenes_1639_v67                          | Listeria_monocytogenes_1639_v31 | 0.9407 |
| Listeria_monocytogenes_1639_v66                          | Listeria_monocytogenes_1639_v31 | 0.953  |

|                                                          |                                 |        |
|----------------------------------------------------------|---------------------------------|--------|
| Listeria_monocytogenes_1639_v65                          | Listeria_monocytogenes_1639_v31 | 0.9436 |
| Listeria_monocytogenes_1639_v64                          | Listeria_monocytogenes_1639_v31 | 0.9515 |
| Listeria_monocytogenes_1639_v63                          | Listeria_monocytogenes_1639_v31 | 0.9362 |
| Listeria_monocytogenes_1639_v62                          | Listeria_monocytogenes_1639_v31 | 0.9546 |
| Listeria_monocytogenes_1639_v61                          | Listeria_monocytogenes_1639_v31 | 0.9499 |
| Listeria_monocytogenes_1639_v60                          | Listeria_monocytogenes_1639_v31 | 0.9711 |
| Listeria_monocytogenes_1639_v5                           | Listeria_monocytogenes_1639_v31 | 0.8897 |
| Listeria_monocytogenes_1639_v59                          | Listeria_monocytogenes_1639_v31 | 0.935  |
| Listeria_monocytogenes_1639_v58                          | Listeria_monocytogenes_1639_v31 | 0.9291 |
| Listeria_monocytogenes_1639_v57                          | Listeria_monocytogenes_1639_v31 | 0.9178 |
| Listeria_monocytogenes_1639_v56                          | Listeria_monocytogenes_1639_v31 | 0.9362 |
| Listeria_monocytogenes_1639_v55                          | Listeria_monocytogenes_1639_v31 | 0.9159 |
| Listeria_monocytogenes_1639_v54                          | Listeria_monocytogenes_1639_v31 | 0.9174 |
| Listeria_monocytogenes_1639_v53                          | Listeria_monocytogenes_1639_v31 | 0.9403 |
| Listeria_monocytogenes_1639_v52                          | Listeria_monocytogenes_1639_v31 | 0.9275 |
| Listeria_monocytogenes_1639_v51                          | Listeria_monocytogenes_1639_v31 | 0.9262 |
| Listeria_monocytogenes_1639_v50                          | Listeria_monocytogenes_1639_v31 | 0.9456 |
| Listeria_monocytogenes_1639_v4                           | Listeria_monocytogenes_1639_v31 | 0.9018 |
| Listeria_monocytogenes_1639_v49                          | Listeria_monocytogenes_1639_v31 | 0.9234 |
| Listeria_monocytogenes_1639_v48                          | Listeria_monocytogenes_1639_v31 | 0.9489 |
| Listeria_monocytogenes_1639_v47                          | Listeria_monocytogenes_1639_v31 | 0.9471 |
| Listeria_monocytogenes_1639_v46                          | Listeria_monocytogenes_1639_v31 | 0.9807 |
| Listeria_monocytogenes_1639_v45                          | Listeria_monocytogenes_1639_v31 | 0.9378 |
| Listeria_monocytogenes_1639_v44                          | Listeria_monocytogenes_1639_v31 | 0.9467 |
| Listeria_monocytogenes_1639_v43                          | Listeria_monocytogenes_1639_v31 | 0.9467 |
| Listeria_monocytogenes_1639_v42                          | Listeria_monocytogenes_1639_v31 | 0.9394 |
| Listeria_monocytogenes_1639_v41                          | Listeria_monocytogenes_1639_v31 | 0.9242 |
| Listeria_monocytogenes_1639_v40                          | Listeria_monocytogenes_1639_v31 | 0.9472 |
| Listeria_monocytogenes_1639_v3                           | Listeria_monocytogenes_1639_v31 | 0.9021 |
| Listeria_monocytogenes_1639_v39                          | Listeria_monocytogenes_1639_v31 | 0.9388 |
| Listeria_monocytogenes_1639_v38                          | Listeria_monocytogenes_1639_v31 | 0.9481 |
| Listeria_monocytogenes_1639_v37                          | Listeria_monocytogenes_1639_v31 | 0.9319 |
| Listeria_monocytogenes_1639_v36                          | Listeria_monocytogenes_1639_v31 | 0.9397 |
| Listeria_monocytogenes_1639_v35                          | Listeria_monocytogenes_1639_v31 | 0.9468 |
| Listeria_monocytogenes_1639_v34                          | Listeria_monocytogenes_1639_v31 | 0.9989 |
| Listeria_monocytogenes_1639_v33                          | Listeria_monocytogenes_1639_v31 | 0.9323 |
| Listeria_monocytogenes_1639_v32                          | Listeria_monocytogenes_1639_v31 | 0.9382 |
| Listeria_monocytogenes_1639_v31                          | Listeria_monocytogenes_1639_v31 | 0.0699 |
| Listeria_welshimeri_1643                                 | Listeria_monocytogenes_1639_v32 | 0.8612 |
| Listeria_welshimeri_serovar_6b_str_SLCC5334_386043       | Listeria_monocytogenes_1639_v32 | 0.8606 |
| Listeria_seeligeri_serovar_1_2b_str_SLCC3954_683837      | Listeria_monocytogenes_1639_v32 | 0.865  |
| Listeria_seeligeri_FSL_S4-171_702452                     | Listeria_monocytogenes_1639_v32 | 0.8058 |
| Listeria_seeligeri_FSL_N1-067_702453                     | Listeria_monocytogenes_1639_v32 | 0.8227 |
| Listeria_seeligeri_1640_v1                               | Listeria_monocytogenes_1639_v32 | 0.8652 |
| Listeria_seeligeri_1640                                  | Listeria_monocytogenes_1639_v32 | 0.8684 |
| Listeria_monocytogenes_WSLC1042_1457188                  | Listeria_monocytogenes_1639_v32 | 0.9145 |
| Listeria_monocytogenes_WSLC1001_1457187                  | Listeria_monocytogenes_1639_v32 | 0.9493 |
| Listeria_monocytogenes_SLCC7179_879090                   | Listeria_monocytogenes_1639_v32 | 0.9447 |
| Listeria_monocytogenes_SLCC5850_882096                   | Listeria_monocytogenes_1639_v32 | 0.9468 |
| Listeria_monocytogenes_SLCC2755_932919                   | Listeria_monocytogenes_1639_v32 | 0.9288 |
| Listeria_monocytogenes_SLCC2540_879089                   | Listeria_monocytogenes_1639_v32 | 0.9337 |
| Listeria_monocytogenes_SLCC2479_882020                   | Listeria_monocytogenes_1639_v32 | 0.9654 |
| Listeria_monocytogenes_SLCC2378_879088                   | Listeria_monocytogenes_1639_v32 | 0.9159 |
| Listeria_monocytogenes_SLCC2376_882097                   | Listeria_monocytogenes_1639_v32 | 0.9216 |
| Listeria_monocytogenes_SLCC2372_932920                   | Listeria_monocytogenes_1639_v32 | 0.9588 |
| Listeria_monocytogenes_serotype_4b_str_LL195_1230340     | Listeria_monocytogenes_1639_v32 | 0.9217 |
| Listeria_monocytogenes_serotype_4b_str_LIS0087_1134669   | Listeria_monocytogenes_1639_v32 | 0.9343 |
| Listeria_monocytogenes_serotype_4b_str_F2365_265669      | Listeria_monocytogenes_1639_v32 | 0.9217 |
| Listeria_monocytogenes_serotype_4b_str_CLIP_80459_568819 | Listeria_monocytogenes_1639_v32 | 0.9239 |
| Listeria_monocytogenes_serotype_4b_str_81-0861_1196161   | Listeria_monocytogenes_1639_v32 | 0.9186 |
| Listeria_monocytogenes_serotype_4b_str_81-0592_1196160   | Listeria_monocytogenes_1639_v32 | 0.9197 |
| Listeria_monocytogenes_serotype_4b_str_81-0558_1196159   | Listeria_monocytogenes_1639_v32 | 0.9204 |
| Listeria_monocytogenes_serotype_4b_str_10-0809_1196162   | Listeria_monocytogenes_1639_v32 | 0.9197 |
| Listeria_monocytogenes_serotype_4b_str_02-6680_1196175   | Listeria_monocytogenes_1639_v32 | 0.9218 |
| Listeria_monocytogenes_serotype_4b_str_02-6679_1196174   | Listeria_monocytogenes_1639_v32 | 0.9218 |
| Listeria_monocytogenes_serotype_4b_str_02-1792_1196173   | Listeria_monocytogenes_1639_v32 | 0.9204 |
| Listeria_monocytogenes_serotype_4b_str_02-1289_1196172   | Listeria_monocytogenes_1639_v32 | 0.9204 |
| Listeria_monocytogenes_serotype_4b_str_02-1103_1196171   | Listeria_monocytogenes_1639_v32 | 0.9204 |
| Listeria_monocytogenes_serotype_3c_str_10-5027_1196195   | Listeria_monocytogenes_1639_v32 | 0.9665 |
| Listeria_monocytogenes_serotype_1_2c_str_10-5026_1196194 | Listeria_monocytogenes_1639_v32 | 0.9676 |
| Listeria_monocytogenes_serotype_1_2c_str_10-5025_1196193 | Listeria_monocytogenes_1639_v32 | 0.9676 |
| Listeria_monocytogenes_serotype_1_2b_str_10-0811_1196164 | Listeria_monocytogenes_1639_v32 | 0.9403 |
| Listeria_monocytogenes_serotype_1_2b_str_10-0810_1196163 | Listeria_monocytogenes_1639_v32 | 0.9403 |
| Listeria_monocytogenes_serotype_1_2a_str_99-6370_1196179 | Listeria_monocytogenes_1639_v32 | 0.9354 |
| Listeria_monocytogenes_serotype_1_2a_str_98-2035_1196178 | Listeria_monocytogenes_1639_v32 | 0.9354 |
| Listeria_monocytogenes_serotype_1_2a_str_95-0093_1196177 | Listeria_monocytogenes_1639_v32 | 0.9397 |
| Listeria_monocytogenes_serotype_1_2a_str_88-0478_1196176 | Listeria_monocytogenes_1639_v32 | 0.9441 |
| Listeria_monocytogenes_serotype_1_2a_str_10-5024_1196192 | Listeria_monocytogenes_1639_v32 | 0.9408 |
| Listeria_monocytogenes_serotype_1_2a_str_10-4758_1196168 | Listeria_monocytogenes_1639_v32 | 0.9487 |
| Listeria_monocytogenes_serotype_1_2a_str_10-4754_1196167 | Listeria_monocytogenes_1639_v32 | 0.9487 |
| Listeria_monocytogenes_serotype_1_2a_str_10-1321_1196191 | Listeria_monocytogenes_1639_v32 | 0.9408 |
| Listeria_monocytogenes_serotype_1_2a_str_10-1047_1196190 | Listeria_monocytogenes_1639_v32 | 0.9411 |
| Listeria_monocytogenes_serotype_1_2a_str_10-1046_1196189 | Listeria_monocytogenes_1639_v32 | 0.9411 |
| Listeria_monocytogenes_serotype_1_2a_str_10-0934_1196170 | Listeria_monocytogenes_1639_v32 | 0.9462 |
| Listeria_monocytogenes_serotype_1_2a_str_10-0933_1196169 | Listeria_monocytogenes_1639_v32 | 0.9462 |
| Listeria_monocytogenes_serotype_1_2a_str_10-0815_1196188 | Listeria_monocytogenes_1639_v32 | 0.9367 |
| Listeria_monocytogenes_serotype_1_2a_str_10-0814_1196187 | Listeria_monocytogenes_1639_v32 | 0.9408 |
| Listeria_monocytogenes_serotype_1_2a_str_10-0813_1196166 | Listeria_monocytogenes_1639_v32 | 0.955  |
| Listeria_monocytogenes_serotype_1_2a_str_10-0812_1196165 | Listeria_monocytogenes_1639_v32 | 0.955  |
| Listeria_monocytogenes_serotype_1_2a_str_08-7669_1196186 | Listeria_monocytogenes_1639_v32 | 0.9343 |
| Listeria_monocytogenes_serotype_1_2a_str_08-7374_1196185 | Listeria_monocytogenes_1639_v32 | 0.9408 |

|                                                          |                                 |        |
|----------------------------------------------------------|---------------------------------|--------|
| Listeria_monocytogenes_serotype_1_2a_str_08-6997_1196184 | Listeria_monocytogenes_1639_v32 | 0.9367 |
| Listeria_monocytogenes_serotype_1_2a_str_08-6569_1196183 | Listeria_monocytogenes_1639_v32 | 0.9367 |
| Listeria_monocytogenes_serotype_1_2a_str_08-6056_1196182 | Listeria_monocytogenes_1639_v32 | 0.9367 |
| Listeria_monocytogenes_serotype_1_2a_str_04-5457_1196181 | Listeria_monocytogenes_1639_v32 | 0.9408 |
| Listeria_monocytogenes_serotype_1_2a_str_02-5993_1196180 | Listeria_monocytogenes_1639_v32 | 0.9404 |
| Listeria_monocytogenes_R479a_1437838                     | Listeria_monocytogenes_1639_v32 | 0.9409 |
| Listeria_monocytogenes_N53-1_1234142                     | Listeria_monocytogenes_1639_v32 | 0.8995 |
| Listeria_monocytogenes_M7_1030009                        | Listeria_monocytogenes_1639_v32 | 0.9092 |
| Listeria_monocytogenes_LO28_393132                       | Listeria_monocytogenes_1639_v32 | 0.9714 |
| Listeria_monocytogenes_L99_563174                        | Listeria_monocytogenes_1639_v32 | 0.9098 |
| Listeria_monocytogenes_L312_882094                       | Listeria_monocytogenes_1639_v32 | 0.9239 |
| Listeria_monocytogenes_J1816_930781                      | Listeria_monocytogenes_1639_v32 | 0.9141 |
| Listeria_monocytogenes_J1-220_930782                     | Listeria_monocytogenes_1639_v32 | 0.9214 |
| Listeria_monocytogenes_J0161_393130                      | Listeria_monocytogenes_1639_v32 | 0.9375 |
| Listeria_monocytogenes_HCC23_552536                      | Listeria_monocytogenes_1639_v32 | 0.9091 |
| Listeria_monocytogenes_FSL_R2-561_393126                 | Listeria_monocytogenes_1639_v32 | 0.9629 |
| Listeria_monocytogenes_FSL_J1-208_393119                 | Listeria_monocytogenes_1639_v32 | 0.888  |
| Listeria_monocytogenes_FSL_J1-175_393118                 | Listeria_monocytogenes_1639_v32 | 0.9338 |
| Listeria_monocytogenes_Finland_1998_393127               | Listeria_monocytogenes_1639_v32 | 0.939  |
| Listeria_monocytogenes_EGD-e_169963_v1                   | Listeria_monocytogenes_1639_v32 | 0.964  |
| Listeria_monocytogenes_EGD-e_169963                      | Listeria_monocytogenes_1639_v32 | 0.9644 |
| Listeria_monocytogenes_EGD_1334565                       | Listeria_monocytogenes_1639_v32 | 0.9475 |
| Listeria_monocytogenes_CFSAN002349_1299895               | Listeria_monocytogenes_1639_v32 | 0.9249 |
| Listeria_monocytogenes_ATCC_19117_882095_v1              | Listeria_monocytogenes_1639_v32 | 0.916  |
| Listeria_monocytogenes_ATCC_19117_882095                 | Listeria_monocytogenes_1639_v32 | 0.916  |
| Listeria_monocytogenes_6179_1288295                      | Listeria_monocytogenes_1639_v32 | 0.9377 |
| Listeria_monocytogenes_1639_v9                           | Listeria_monocytogenes_1639_v32 | 0.9238 |
| Listeria_monocytogenes_1639_v99                          | Listeria_monocytogenes_1639_v32 | 0.9149 |
| Listeria_monocytogenes_1639_v98                          | Listeria_monocytogenes_1639_v32 | 0.9412 |
| Listeria_monocytogenes_1639_v97                          | Listeria_monocytogenes_1639_v32 | 0.9175 |
| Listeria_monocytogenes_1639_v96                          | Listeria_monocytogenes_1639_v32 | 0.9149 |
| Listeria_monocytogenes_1639_v95                          | Listeria_monocytogenes_1639_v32 | 0.915  |
| Listeria_monocytogenes_1639_v94                          | Listeria_monocytogenes_1639_v32 | 0.9149 |
| Listeria_monocytogenes_1639_v93                          | Listeria_monocytogenes_1639_v32 | 0.9356 |
| Listeria_monocytogenes_1639_v92                          | Listeria_monocytogenes_1639_v32 | 0.9145 |
| Listeria_monocytogenes_1639_v91                          | Listeria_monocytogenes_1639_v32 | 0.9276 |
| Listeria_monocytogenes_1639_v90                          | Listeria_monocytogenes_1639_v32 | 0.9412 |
| Listeria_monocytogenes_1639_v8                           | Listeria_monocytogenes_1639_v32 | 0.9404 |
| Listeria_monocytogenes_1639_v89                          | Listeria_monocytogenes_1639_v32 | 0.9276 |
| Listeria_monocytogenes_1639_v88                          | Listeria_monocytogenes_1639_v32 | 0.9469 |
| Listeria_monocytogenes_1639_v87                          | Listeria_monocytogenes_1639_v32 | 0.9515 |
| Listeria_monocytogenes_1639_v86                          | Listeria_monocytogenes_1639_v32 | 0.9508 |
| Listeria_monocytogenes_1639_v85                          | Listeria_monocytogenes_1639_v32 | 0.9169 |
| Listeria_monocytogenes_1639_v84                          | Listeria_monocytogenes_1639_v32 | 0.9457 |
| Listeria_monocytogenes_1639_v83                          | Listeria_monocytogenes_1639_v32 | 0.9181 |
| Listeria_monocytogenes_1639_v82                          | Listeria_monocytogenes_1639_v32 | 0.9178 |
| Listeria_monocytogenes_1639_v81                          | Listeria_monocytogenes_1639_v32 | 0.9458 |
| Listeria_monocytogenes_1639_v80                          | Listeria_monocytogenes_1639_v32 | 0.939  |
| Listeria_monocytogenes_1639_v7                           | Listeria_monocytogenes_1639_v32 | 0.9404 |
| Listeria_monocytogenes_1639_v79                          | Listeria_monocytogenes_1639_v32 | 0.9396 |
| Listeria_monocytogenes_1639_v78                          | Listeria_monocytogenes_1639_v32 | 0.944  |
| Listeria_monocytogenes_1639_v77                          | Listeria_monocytogenes_1639_v32 | 0.9345 |
| Listeria_monocytogenes_1639_v76                          | Listeria_monocytogenes_1639_v32 | 0.9371 |
| Listeria_monocytogenes_1639_v75                          | Listeria_monocytogenes_1639_v32 | 0.9098 |
| Listeria_monocytogenes_1639_v74                          | Listeria_monocytogenes_1639_v32 | 0.9379 |
| Listeria_monocytogenes_1639_v73                          | Listeria_monocytogenes_1639_v32 | 0.9697 |
| Listeria_monocytogenes_1639_v72                          | Listeria_monocytogenes_1639_v32 | 0.9169 |
| Listeria_monocytogenes_1639_v71                          | Listeria_monocytogenes_1639_v32 | 0.9271 |
| Listeria_monocytogenes_1639_v70                          | Listeria_monocytogenes_1639_v32 | 0.9692 |
| Listeria_monocytogenes_1639_v6                           | Listeria_monocytogenes_1639_v32 | 0.9397 |
| Listeria_monocytogenes_1639_v69                          | Listeria_monocytogenes_1639_v32 | 0.92   |
| Listeria_monocytogenes_1639_v68                          | Listeria_monocytogenes_1639_v32 | 0.9395 |
| Listeria_monocytogenes_1639_v67                          | Listeria_monocytogenes_1639_v32 | 0.9288 |
| Listeria_monocytogenes_1639_v66                          | Listeria_monocytogenes_1639_v32 | 0.9488 |
| Listeria_monocytogenes_1639_v65                          | Listeria_monocytogenes_1639_v32 | 0.9534 |
| Listeria_monocytogenes_1639_v64                          | Listeria_monocytogenes_1639_v32 | 0.9436 |
| Listeria_monocytogenes_1639_v63                          | Listeria_monocytogenes_1639_v32 | 0.9307 |
| Listeria_monocytogenes_1639_v62                          | Listeria_monocytogenes_1639_v32 | 0.9398 |
| Listeria_monocytogenes_1639_v61                          | Listeria_monocytogenes_1639_v32 | 0.9428 |
| Listeria_monocytogenes_1639_v60                          | Listeria_monocytogenes_1639_v32 | 0.9339 |
| Listeria_monocytogenes_1639_v5                           | Listeria_monocytogenes_1639_v32 | 0.9086 |
| Listeria_monocytogenes_1639_v59                          | Listeria_monocytogenes_1639_v32 | 0.9162 |
| Listeria_monocytogenes_1639_v58                          | Listeria_monocytogenes_1639_v32 | 0.9214 |
| Listeria_monocytogenes_1639_v57                          | Listeria_monocytogenes_1639_v32 | 0.9102 |
| Listeria_monocytogenes_1639_v56                          | Listeria_monocytogenes_1639_v32 | 0.9129 |
| Listeria_monocytogenes_1639_v55                          | Listeria_monocytogenes_1639_v32 | 0.9145 |
| Listeria_monocytogenes_1639_v54                          | Listeria_monocytogenes_1639_v32 | 0.909  |
| Listeria_monocytogenes_1639_v53                          | Listeria_monocytogenes_1639_v32 | 0.9277 |
| Listeria_monocytogenes_1639_v52                          | Listeria_monocytogenes_1639_v32 | 0.9238 |
| Listeria_monocytogenes_1639_v51                          | Listeria_monocytogenes_1639_v32 | 0.9134 |
| Listeria_monocytogenes_1639_v50                          | Listeria_monocytogenes_1639_v32 | 0.9397 |
| Listeria_monocytogenes_1639_v4                           | Listeria_monocytogenes_1639_v32 | 0.9209 |
| Listeria_monocytogenes_1639_v49                          | Listeria_monocytogenes_1639_v32 | 0.9112 |
| Listeria_monocytogenes_1639_v48                          | Listeria_monocytogenes_1639_v32 | 0.9605 |
| Listeria_monocytogenes_1639_v47                          | Listeria_monocytogenes_1639_v32 | 0.9419 |
| Listeria_monocytogenes_1639_v46                          | Listeria_monocytogenes_1639_v32 | 0.9307 |
| Listeria_monocytogenes_1639_v45                          | Listeria_monocytogenes_1639_v32 | 0.9313 |
| Listeria_monocytogenes_1639_v44                          | Listeria_monocytogenes_1639_v32 | 0.9408 |
| Listeria_monocytogenes_1639_v43                          | Listeria_monocytogenes_1639_v32 | 0.9408 |
| Listeria_monocytogenes_1639_v42                          | Listeria_monocytogenes_1639_v32 | 0.9226 |
| Listeria_monocytogenes_1639_v41                          | Listeria_monocytogenes_1639_v32 | 0.9235 |

|                                                          |                                 |        |
|----------------------------------------------------------|---------------------------------|--------|
| Listeria_monocytogenes_1639_v40                          | Listeria_monocytogenes_1639_v32 | 0.9611 |
| Listeria_monocytogenes_1639_v3                           | Listeria_monocytogenes_1639_v32 | 0.9212 |
| Listeria_monocytogenes_1639_v39                          | Listeria_monocytogenes_1639_v32 | 0.9314 |
| Listeria_monocytogenes_1639_v38                          | Listeria_monocytogenes_1639_v32 | 0.9634 |
| Listeria_monocytogenes_1639_v37                          | Listeria_monocytogenes_1639_v32 | 0.9708 |
| Listeria_monocytogenes_1639_v36                          | Listeria_monocytogenes_1639_v32 | 0.9367 |
| Listeria_monocytogenes_1639_v35                          | Listeria_monocytogenes_1639_v32 | 0.9592 |
| Listeria_monocytogenes_1639_v34                          | Listeria_monocytogenes_1639_v32 | 0.9378 |
| Listeria_monocytogenes_1639_v33                          | Listeria_monocytogenes_1639_v32 | 0.9403 |
| Listeria_monocytogenes_1639_v32                          | Listeria_monocytogenes_1639_v32 | 0.0688 |
| Listeria_welshimeri_1643                                 | Listeria_monocytogenes_1639_v33 | 0.8694 |
| Listeria_welshimeri_serovar_6b_str_SLCC5334_386043       | Listeria_monocytogenes_1639_v33 | 0.8691 |
| Listeria_seeligeri_serovar_1_2b_str_SLCC3954_683837      | Listeria_monocytogenes_1639_v33 | 0.8744 |
| Listeria_seeligeri_FSL_S4-171_702452                     | Listeria_monocytogenes_1639_v33 | 0.8154 |
| Listeria_seeligeri_FSL_N1-067_702453                     | Listeria_monocytogenes_1639_v33 | 0.8298 |
| Listeria_seeligeri_1640_v1                               | Listeria_monocytogenes_1639_v33 | 0.876  |
| Listeria_seeligeri_1640                                  | Listeria_monocytogenes_1639_v33 | 0.8769 |
| Listeria_monocytogenes_WSLC1042_1457188                  | Listeria_monocytogenes_1639_v33 | 0.9371 |
| Listeria_monocytogenes_WSLC1001_1457187                  | Listeria_monocytogenes_1639_v33 | 0.9374 |
| Listeria_monocytogenes_SLCC7179_879090                   | Listeria_monocytogenes_1639_v33 | 0.9376 |
| Listeria_monocytogenes_SLCC5850_882096                   | Listeria_monocytogenes_1639_v33 | 0.939  |
| Listeria_monocytogenes_SLCC2755_932919                   | Listeria_monocytogenes_1639_v33 | 0.9309 |
| Listeria_monocytogenes_SLCC2540_879089                   | Listeria_monocytogenes_1639_v33 | 0.9564 |
| Listeria_monocytogenes_SLCC2479_882020                   | Listeria_monocytogenes_1639_v33 | 0.9385 |
| Listeria_monocytogenes_SLCC2378_879088                   | Listeria_monocytogenes_1639_v33 | 0.9382 |
| Listeria_monocytogenes_SLCC2376_882097                   | Listeria_monocytogenes_1639_v33 | 0.9272 |
| Listeria_monocytogenes_SLCC2372_932920                   | Listeria_monocytogenes_1639_v33 | 0.9313 |
| Listeria_monocytogenes_serotype_4b_str_LL195_1230340     | Listeria_monocytogenes_1639_v33 | 0.9442 |
| Listeria_monocytogenes_serotype_4b_str_LIS0087_1134669   | Listeria_monocytogenes_1639_v33 | 0.9282 |
| Listeria_monocytogenes_serotype_4b_str_F2365_265669      | Listeria_monocytogenes_1639_v33 | 0.9442 |
| Listeria_monocytogenes_serotype_4b_str_CLIP_80459_568819 | Listeria_monocytogenes_1639_v33 | 0.946  |
| Listeria_monocytogenes_serotype_4b_str_81-0861_1196161   | Listeria_monocytogenes_1639_v33 | 0.9429 |
| Listeria_monocytogenes_serotype_4b_str_81-0592_1196160   | Listeria_monocytogenes_1639_v33 | 0.944  |
| Listeria_monocytogenes_serotype_4b_str_81-0558_1196159   | Listeria_monocytogenes_1639_v33 | 0.9447 |
| Listeria_monocytogenes_serotype_4b_str_10-0809_1196162   | Listeria_monocytogenes_1639_v33 | 0.9444 |
| Listeria_monocytogenes_serotype_4b_str_02-6680_1196175   | Listeria_monocytogenes_1639_v33 | 0.9416 |
| Listeria_monocytogenes_serotype_4b_str_02-6679_1196174   | Listeria_monocytogenes_1639_v33 | 0.9416 |
| Listeria_monocytogenes_serotype_4b_str_02-1792_1196173   | Listeria_monocytogenes_1639_v33 | 0.9455 |
| Listeria_monocytogenes_serotype_4b_str_02-1289_1196172   | Listeria_monocytogenes_1639_v33 | 0.9455 |
| Listeria_monocytogenes_serotype_4b_str_02-1103_1196171   | Listeria_monocytogenes_1639_v33 | 0.9455 |
| Listeria_monocytogenes_serotype_3c_str_10-5027_1196195   | Listeria_monocytogenes_1639_v33 | 0.9422 |
| Listeria_monocytogenes_serotype_1_2c_str_10-5026_1196194 | Listeria_monocytogenes_1639_v33 | 0.943  |
| Listeria_monocytogenes_serotype_1_2c_str_10-5025_1196193 | Listeria_monocytogenes_1639_v33 | 0.943  |
| Listeria_monocytogenes_serotype_1_2b_str_10-0811_1196164 | Listeria_monocytogenes_1639_v33 | 1      |
| Listeria_monocytogenes_serotype_1_2b_str_10-0810_1196163 | Listeria_monocytogenes_1639_v33 | 1      |
| Listeria_monocytogenes_serotype_1_2a_str_99-6370_1196179 | Listeria_monocytogenes_1639_v33 | 0.9382 |
| Listeria_monocytogenes_serotype_1_2a_str_98-2035_1196178 | Listeria_monocytogenes_1639_v33 | 0.9382 |
| Listeria_monocytogenes_serotype_1_2a_str_95-0093_1196177 | Listeria_monocytogenes_1639_v33 | 0.9342 |
| Listeria_monocytogenes_serotype_1_2a_str_88-0478_1196176 | Listeria_monocytogenes_1639_v33 | 0.9316 |
| Listeria_monocytogenes_serotype_1_2a_str_10-5024_1196192 | Listeria_monocytogenes_1639_v33 | 0.9345 |
| Listeria_monocytogenes_serotype_1_2a_str_10-4758_1196168 | Listeria_monocytogenes_1639_v33 | 0.9413 |
| Listeria_monocytogenes_serotype_1_2a_str_10-4754_1196167 | Listeria_monocytogenes_1639_v33 | 0.9417 |
| Listeria_monocytogenes_serotype_1_2a_str_10-1321_1196191 | Listeria_monocytogenes_1639_v33 | 0.9345 |
| Listeria_monocytogenes_serotype_1_2a_str_10-1047_1196190 | Listeria_monocytogenes_1639_v33 | 0.9356 |
| Listeria_monocytogenes_serotype_1_2a_str_10-1046_1196189 | Listeria_monocytogenes_1639_v33 | 0.9356 |
| Listeria_monocytogenes_serotype_1_2a_str_10-0934_1196170 | Listeria_monocytogenes_1639_v33 | 0.9356 |
| Listeria_monocytogenes_serotype_1_2a_str_10-0933_1196169 | Listeria_monocytogenes_1639_v33 | 0.9356 |
| Listeria_monocytogenes_serotype_1_2a_str_10-0815_1196188 | Listeria_monocytogenes_1639_v33 | 0.9396 |
| Listeria_monocytogenes_serotype_1_2a_str_10-0814_1196187 | Listeria_monocytogenes_1639_v33 | 0.9349 |
| Listeria_monocytogenes_serotype_1_2a_str_10-0813_1196166 | Listeria_monocytogenes_1639_v33 | 0.9491 |
| Listeria_monocytogenes_serotype_1_2a_str_10-0812_1196165 | Listeria_monocytogenes_1639_v33 | 0.9491 |
| Listeria_monocytogenes_serotype_1_2a_str_08-7669_1196186 | Listeria_monocytogenes_1639_v33 | 0.9287 |
| Listeria_monocytogenes_serotype_1_2a_str_08-7374_1196185 | Listeria_monocytogenes_1639_v33 | 0.9345 |
| Listeria_monocytogenes_serotype_1_2a_str_08-6997_1196184 | Listeria_monocytogenes_1639_v33 | 0.9396 |
| Listeria_monocytogenes_serotype_1_2a_str_08-6569_1196183 | Listeria_monocytogenes_1639_v33 | 0.9396 |
| Listeria_monocytogenes_serotype_1_2a_str_08-6056_1196182 | Listeria_monocytogenes_1639_v33 | 0.9396 |
| Listeria_monocytogenes_serotype_1_2a_str_04-5457_1196181 | Listeria_monocytogenes_1639_v33 | 0.9345 |
| Listeria_monocytogenes_serotype_1_2a_str_02-5993_1196180 | Listeria_monocytogenes_1639_v33 | 0.9345 |
| Listeria_monocytogenes_R479a_1437838                     | Listeria_monocytogenes_1639_v33 | 0.9342 |
| Listeria_monocytogenes_N53-1_1234142                     | Listeria_monocytogenes_1639_v33 | 0.8917 |
| Listeria_monocytogenes_M7_1030009                        | Listeria_monocytogenes_1639_v33 | 0.9152 |
| Listeria_monocytogenes_LO28_393132                       | Listeria_monocytogenes_1639_v33 | 0.9457 |
| Listeria_monocytogenes_L99_563174                        | Listeria_monocytogenes_1639_v33 | 0.9155 |
| Listeria_monocytogenes_L312_882094                       | Listeria_monocytogenes_1639_v33 | 0.9464 |
| Listeria_monocytogenes_J1816_930781                      | Listeria_monocytogenes_1639_v33 | 0.9361 |
| Listeria_monocytogenes_J1-220_930782                     | Listeria_monocytogenes_1639_v33 | 0.9463 |
| Listeria_monocytogenes_J0161_393130                      | Listeria_monocytogenes_1639_v33 | 0.9357 |
| Listeria_monocytogenes_HCC23_552536                      | Listeria_monocytogenes_1639_v33 | 0.9144 |
| Listeria_monocytogenes_FSL_R2-561_393126                 | Listeria_monocytogenes_1639_v33 | 0.939  |
| Listeria_monocytogenes_FSL_J1-208_393119                 | Listeria_monocytogenes_1639_v33 | 0.8955 |
| Listeria_monocytogenes_FSL_J1-175_393118                 | Listeria_monocytogenes_1639_v33 | 0.9558 |
| Listeria_monocytogenes_Finland_1998_393127               | Listeria_monocytogenes_1639_v33 | 0.936  |
| Listeria_monocytogenes_EGD-e_169963_v1                   | Listeria_monocytogenes_1639_v33 | 0.9425 |
| Listeria_monocytogenes_EGD-e_169963                      | Listeria_monocytogenes_1639_v33 | 0.9429 |
| Listeria_monocytogenes_EGD_1334565                       | Listeria_monocytogenes_1639_v33 | 0.9397 |
| Listeria_monocytogenes_CFSAN002349_1299895               | Listeria_monocytogenes_1639_v33 | 0.9462 |
| Listeria_monocytogenes_ATCC_19117_882095_v1              | Listeria_monocytogenes_1639_v33 | 0.9395 |
| Listeria_monocytogenes_ATCC_19117_882095                 | Listeria_monocytogenes_1639_v33 | 0.9391 |
| Listeria_monocytogenes_6179_1288295                      | Listeria_monocytogenes_1639_v33 | 0.9315 |
| Listeria_monocytogenes_1639_v9                           | Listeria_monocytogenes_1639_v33 | 0.9451 |
| Listeria_monocytogenes_1639_v99                          | Listeria_monocytogenes_1639_v33 | 0.9365 |



|                                                        |                                 |        |
|--------------------------------------------------------|---------------------------------|--------|
| Listeria_monocytogenes_1639_v98                        | Listeria_monocytogenes_1639_v33 | 0.9408 |
| Listeria_monocytogenes_1639_v97                        | Listeria_monocytogenes_1639_v33 | 0.9375 |
| Listeria_monocytogenes_1639_v96                        | Listeria_monocytogenes_1639_v33 | 0.9369 |
| Listeria_monocytogenes_1639_v95                        | Listeria_monocytogenes_1639_v33 | 0.9369 |
| Listeria_monocytogenes_1639_v94                        | Listeria_monocytogenes_1639_v33 | 0.9372 |
| Listeria_monocytogenes_1639_v93                        | Listeria_monocytogenes_1639_v33 | 0.9304 |
| Listeria_monocytogenes_1639_v92                        | Listeria_monocytogenes_1639_v33 | 0.9372 |
| Listeria_monocytogenes_1639_v91                        | Listeria_monocytogenes_1639_v33 | 0.9497 |
| Listeria_monocytogenes_1639_v90                        | Listeria_monocytogenes_1639_v33 | 0.9408 |
| Listeria_monocytogenes_1639_v8                         | Listeria_monocytogenes_1639_v33 | 0.9241 |
| Listeria_monocytogenes_1639_v89                        | Listeria_monocytogenes_1639_v33 | 0.9492 |
| Listeria_monocytogenes_1639_v88                        | Listeria_monocytogenes_1639_v33 | 0.938  |
| Listeria_monocytogenes_1639_v87                        | Listeria_monocytogenes_1639_v33 | 0.9427 |
| Listeria_monocytogenes_1639_v86                        | Listeria_monocytogenes_1639_v33 | 0.942  |
| Listeria_monocytogenes_1639_v85                        | Listeria_monocytogenes_1639_v33 | 0.9441 |
| Listeria_monocytogenes_1639_v84                        | Listeria_monocytogenes_1639_v33 | 0.939  |
| Listeria_monocytogenes_1639_v83                        | Listeria_monocytogenes_1639_v33 | 0.9439 |
| Listeria_monocytogenes_1639_v82                        | Listeria_monocytogenes_1639_v33 | 0.9436 |
| Listeria_monocytogenes_1639_v81                        | Listeria_monocytogenes_1639_v33 | 0.9391 |
| Listeria_monocytogenes_1639_v80                        | Listeria_monocytogenes_1639_v33 | 0.9769 |
| Listeria_monocytogenes_1639_v7                         | Listeria_monocytogenes_1639_v33 | 0.9241 |
| Listeria_monocytogenes_1639_v79                        | Listeria_monocytogenes_1639_v33 | 0.9374 |
| Listeria_monocytogenes_1639_v78                        | Listeria_monocytogenes_1639_v33 | 0.9395 |
| Listeria_monocytogenes_1639_v77                        | Listeria_monocytogenes_1639_v33 | 0.9259 |
| Listeria_monocytogenes_1639_v76                        | Listeria_monocytogenes_1639_v33 | 0.94   |
| Listeria_monocytogenes_1639_v75                        | Listeria_monocytogenes_1639_v33 | 0.9155 |
| Listeria_monocytogenes_1639_v74                        | Listeria_monocytogenes_1639_v33 | 0.9253 |
| Listeria_monocytogenes_1639_v73                        | Listeria_monocytogenes_1639_v33 | 0.9426 |
| Listeria_monocytogenes_1639_v72                        | Listeria_monocytogenes_1639_v33 | 0.9409 |
| Listeria_monocytogenes_1639_v71                        | Listeria_monocytogenes_1639_v33 | 0.9226 |
| Listeria_monocytogenes_1639_v70                        | Listeria_monocytogenes_1639_v33 | 0.9373 |
| Listeria_monocytogenes_1639_v6                         | Listeria_monocytogenes_1639_v33 | 0.9237 |
| Listeria_monocytogenes_1639_v69                        | Listeria_monocytogenes_1639_v33 | 0.944  |
| Listeria_monocytogenes_1639_v68                        | Listeria_monocytogenes_1639_v33 | 0.9335 |
| Listeria_monocytogenes_1639_v67                        | Listeria_monocytogenes_1639_v33 | 0.954  |
| Listeria_monocytogenes_1639_v66                        | Listeria_monocytogenes_1639_v33 | 0.9358 |
| Listeria_monocytogenes_1639_v65                        | Listeria_monocytogenes_1639_v33 | 0.955  |
| Listeria_monocytogenes_1639_v64                        | Listeria_monocytogenes_1639_v33 | 0.9407 |
| Listeria_monocytogenes_1639_v63                        | Listeria_monocytogenes_1639_v33 | 0.9664 |
| Listeria_monocytogenes_1639_v62                        | Listeria_monocytogenes_1639_v33 | 0.9449 |
| Listeria_monocytogenes_1639_v61                        | Listeria_monocytogenes_1639_v33 | 0.9358 |
| Listeria_monocytogenes_1639_v60                        | Listeria_monocytogenes_1639_v33 | 0.9294 |
| Listeria_monocytogenes_1639_v5                         | Listeria_monocytogenes_1639_v33 | 0.9382 |
| Listeria_monocytogenes_1639_v59                        | Listeria_monocytogenes_1639_v33 | 0.9398 |
| Listeria_monocytogenes_1639_v58                        | Listeria_monocytogenes_1639_v33 | 0.9476 |
| Listeria_monocytogenes_1639_v57                        | Listeria_monocytogenes_1639_v33 | 0.9305 |
| Listeria_monocytogenes_1639_v56                        | Listeria_monocytogenes_1639_v33 | 0.9383 |
| Listeria_monocytogenes_1639_v55                        | Listeria_monocytogenes_1639_v33 | 0.9367 |
| Listeria_monocytogenes_1639_v54                        | Listeria_monocytogenes_1639_v33 | 0.9117 |
| Listeria_monocytogenes_1639_v53                        | Listeria_monocytogenes_1639_v33 | 0.9212 |
| Listeria_monocytogenes_1639_v52                        | Listeria_monocytogenes_1639_v33 | 0.9489 |
| Listeria_monocytogenes_1639_v51                        | Listeria_monocytogenes_1639_v33 | 0.9405 |
| Listeria_monocytogenes_1639_v50                        | Listeria_monocytogenes_1639_v33 | 0.9338 |
| Listeria_monocytogenes_1639_v4                         | Listeria_monocytogenes_1639_v33 | 0.9517 |
| Listeria_monocytogenes_1639_v49                        | Listeria_monocytogenes_1639_v33 | 0.9333 |
| Listeria_monocytogenes_1639_v48                        | Listeria_monocytogenes_1639_v33 | 0.9466 |
| Listeria_monocytogenes_1639_v47                        | Listeria_monocytogenes_1639_v33 | 0.932  |
| Listeria_monocytogenes_1639_v46                        | Listeria_monocytogenes_1639_v33 | 0.925  |
| Listeria_monocytogenes_1639_v45                        | Listeria_monocytogenes_1639_v33 | 0.9254 |
| Listeria_monocytogenes_1639_v44                        | Listeria_monocytogenes_1639_v33 | 0.9345 |
| Listeria_monocytogenes_1639_v43                        | Listeria_monocytogenes_1639_v33 | 0.9345 |
| Listeria_monocytogenes_1639_v42                        | Listeria_monocytogenes_1639_v33 | 0.9236 |
| Listeria_monocytogenes_1639_v41                        | Listeria_monocytogenes_1639_v33 | 0.9252 |
| Listeria_monocytogenes_1639_v40                        | Listeria_monocytogenes_1639_v33 | 0.9442 |
| Listeria_monocytogenes_1639_v3                         | Listeria_monocytogenes_1639_v33 | 0.9521 |
| Listeria_monocytogenes_1639_v39                        | Listeria_monocytogenes_1639_v33 | 0.9542 |
| Listeria_monocytogenes_1639_v38                        | Listeria_monocytogenes_1639_v33 | 0.9303 |
| Listeria_monocytogenes_1639_v37                        | Listeria_monocytogenes_1639_v33 | 0.9259 |
| Listeria_monocytogenes_1639_v36                        | Listeria_monocytogenes_1639_v33 | 0.9293 |
| Listeria_monocytogenes_1639_v35                        | Listeria_monocytogenes_1639_v33 | 0.943  |
| Listeria_monocytogenes_1639_v34                        | Listeria_monocytogenes_1639_v33 | 0.9319 |
| Listeria_monocytogenes_1639_v33                        | Listeria_monocytogenes_1639_v33 | 0.0719 |
| Listeria_welshimeri_1643                               | Listeria_monocytogenes_1639_v34 | 0.8741 |
| Listeria_welshimeri_serovar_6b_str_SLCC5334_386043     | Listeria_monocytogenes_1639_v34 | 0.8734 |
| Listeria_seeligeri_serovar_1_2b_str_SLCC3954_683837    | Listeria_monocytogenes_1639_v34 | 0.8784 |
| Listeria_seeligeri_FSL_S4-171_702452                   | Listeria_monocytogenes_1639_v34 | 0.8152 |
| Listeria_seeligeri_FSL_N1-067_702453                   | Listeria_monocytogenes_1639_v34 | 0.8356 |
| Listeria_seeligeri_1640_v1                             | Listeria_monocytogenes_1639_v34 | 0.8743 |
| Listeria_seeligeri_1640                                | Listeria_monocytogenes_1639_v34 | 0.8711 |
| Listeria_monocytogenes_WSLC1042_1457188                | Listeria_monocytogenes_1639_v34 | 0.9283 |
| Listeria_monocytogenes_WSLC1001_1457187                | Listeria_monocytogenes_1639_v34 | 0.9505 |
| Listeria_monocytogenes_SLCC7179_879090                 | Listeria_monocytogenes_1639_v34 | 0.9474 |
| Listeria_monocytogenes_SLCC5850_882096                 | Listeria_monocytogenes_1639_v34 | 0.9518 |
| Listeria_monocytogenes_SLCC2755_932919                 | Listeria_monocytogenes_1639_v34 | 0.9258 |
| Listeria_monocytogenes_SLCC2540_879089                 | Listeria_monocytogenes_1639_v34 | 0.9393 |
| Listeria_monocytogenes_SLCC2479_882020                 | Listeria_monocytogenes_1639_v34 | 0.9527 |
| Listeria_monocytogenes_SLCC2378_879088                 | Listeria_monocytogenes_1639_v34 | 0.9296 |
| Listeria_monocytogenes_SLCC2376_882097                 | Listeria_monocytogenes_1639_v34 | 0.9238 |
| Listeria_monocytogenes_SLCC2372_932920                 | Listeria_monocytogenes_1639_v34 | 0.9464 |
| Listeria_monocytogenes_serotype_4b_str_LL195_1230340   | Listeria_monocytogenes_1639_v34 | 0.9254 |
| Listeria_monocytogenes_serotype_4b_str_LIS0087_1134669 | Listeria_monocytogenes_1639_v34 | 0.9313 |

|                                                          |                                 |        |
|----------------------------------------------------------|---------------------------------|--------|
| Listeria_monocytogenes_serotype_4b_str_F2365_265669      | Listeria_monocytogenes_1639_v34 | 0.9254 |
| Listeria_monocytogenes_serotype_4b_str_CLIP_80459_568819 | Listeria_monocytogenes_1639_v34 | 0.9321 |
| Listeria_monocytogenes_serotype_4b_str_81-0861_1196161   | Listeria_monocytogenes_1639_v34 | 0.9252 |
| Listeria_monocytogenes_serotype_4b_str_81-0592_1196160   | Listeria_monocytogenes_1639_v34 | 0.9263 |
| Listeria_monocytogenes_serotype_4b_str_81-0558_1196159   | Listeria_monocytogenes_1639_v34 | 0.927  |
| Listeria_monocytogenes_serotype_4b_str_10-0809_1196162   | Listeria_monocytogenes_1639_v34 | 0.9263 |
| Listeria_monocytogenes_serotype_4b_str_02-6680_1196175   | Listeria_monocytogenes_1639_v34 | 0.9281 |
| Listeria_monocytogenes_serotype_4b_str_02-6679_1196174   | Listeria_monocytogenes_1639_v34 | 0.9281 |
| Listeria_monocytogenes_serotype_4b_str_02-1792_1196173   | Listeria_monocytogenes_1639_v34 | 0.9278 |
| Listeria_monocytogenes_serotype_4b_str_02-1289_1196172   | Listeria_monocytogenes_1639_v34 | 0.9278 |
| Listeria_monocytogenes_serotype_4b_str_02-1103_1196171   | Listeria_monocytogenes_1639_v34 | 0.9278 |
| Listeria_monocytogenes_serotype_3c_str_10-5027_1196195   | Listeria_monocytogenes_1639_v34 | 0.9527 |
| Listeria_monocytogenes_serotype_1_2c_str_10-5026_1196194 | Listeria_monocytogenes_1639_v34 | 0.9538 |
| Listeria_monocytogenes_serotype_1_2c_str_10-5025_1196193 | Listeria_monocytogenes_1639_v34 | 0.9538 |
| Listeria_monocytogenes_serotype_1_2b_str_10-0811_1196164 | Listeria_monocytogenes_1639_v34 | 0.9319 |
| Listeria_monocytogenes_serotype_1_2b_str_10-0810_1196163 | Listeria_monocytogenes_1639_v34 | 0.9319 |
| Listeria_monocytogenes_serotype_1_2a_str_99-6370_1196179 | Listeria_monocytogenes_1639_v34 | 0.9427 |
| Listeria_monocytogenes_serotype_1_2a_str_98-2035_1196178 | Listeria_monocytogenes_1639_v34 | 0.9427 |
| Listeria_monocytogenes_serotype_1_2a_str_95-0093_1196177 | Listeria_monocytogenes_1639_v34 | 0.9467 |
| Listeria_monocytogenes_serotype_1_2a_str_88-0478_1196176 | Listeria_monocytogenes_1639_v34 | 0.9471 |
| Listeria_monocytogenes_serotype_1_2a_str_10-5024_1196192 | Listeria_monocytogenes_1639_v34 | 0.9467 |
| Listeria_monocytogenes_serotype_1_2a_str_10-4758_1196168 | Listeria_monocytogenes_1639_v34 | 0.9548 |
| Listeria_monocytogenes_serotype_1_2a_str_10-4754_1196167 | Listeria_monocytogenes_1639_v34 | 0.9548 |
| Listeria_monocytogenes_serotype_1_2a_str_10-1321_1196191 | Listeria_monocytogenes_1639_v34 | 0.9467 |
| Listeria_monocytogenes_serotype_1_2a_str_10-1047_1196190 | Listeria_monocytogenes_1639_v34 | 0.9471 |
| Listeria_monocytogenes_serotype_1_2a_str_10-1046_1196189 | Listeria_monocytogenes_1639_v34 | 0.9471 |
| Listeria_monocytogenes_serotype_1_2a_str_10-0934_1196170 | Listeria_monocytogenes_1639_v34 | 0.9489 |
| Listeria_monocytogenes_serotype_1_2a_str_10-0933_1196169 | Listeria_monocytogenes_1639_v34 | 0.9489 |
| Listeria_monocytogenes_serotype_1_2a_str_10-0815_1196188 | Listeria_monocytogenes_1639_v34 | 0.9426 |
| Listeria_monocytogenes_serotype_1_2a_str_10-0814_1196187 | Listeria_monocytogenes_1639_v34 | 0.9467 |
| Listeria_monocytogenes_serotype_1_2a_str_10-0813_1196166 | Listeria_monocytogenes_1639_v34 | 0.951  |
| Listeria_monocytogenes_serotype_1_2a_str_10-0812_1196165 | Listeria_monocytogenes_1639_v34 | 0.951  |
| Listeria_monocytogenes_serotype_1_2a_str_08-7669_1196186 | Listeria_monocytogenes_1639_v34 | 0.9447 |
| Listeria_monocytogenes_serotype_1_2a_str_08-7374_1196185 | Listeria_monocytogenes_1639_v34 | 0.9467 |
| Listeria_monocytogenes_serotype_1_2a_str_08-6997_1196184 | Listeria_monocytogenes_1639_v34 | 0.9426 |
| Listeria_monocytogenes_serotype_1_2a_str_08-6569_1196183 | Listeria_monocytogenes_1639_v34 | 0.9426 |
| Listeria_monocytogenes_serotype_1_2a_str_08-6056_1196182 | Listeria_monocytogenes_1639_v34 | 0.9426 |
| Listeria_monocytogenes_serotype_1_2a_str_04-5457_1196181 | Listeria_monocytogenes_1639_v34 | 0.9467 |
| Listeria_monocytogenes_serotype_1_2a_str_02-5993_1196180 | Listeria_monocytogenes_1639_v34 | 0.9464 |
| Listeria_monocytogenes_R479a_1437838                     | Listeria_monocytogenes_1639_v34 | 0.9435 |
| Listeria_monocytogenes_N53-1_1234142                     | Listeria_monocytogenes_1639_v34 | 0.899  |
| Listeria_monocytogenes_M7_1030009                        | Listeria_monocytogenes_1639_v34 | 0.9087 |
| Listeria_monocytogenes_LO28_393132                       | Listeria_monocytogenes_1639_v34 | 0.9461 |
| Listeria_monocytogenes_L99_563174                        | Listeria_monocytogenes_1639_v34 | 0.909  |
| Listeria_monocytogenes_L312_882094                       | Listeria_monocytogenes_1639_v34 | 0.9321 |
| Listeria_monocytogenes_J1816_930781                      | Listeria_monocytogenes_1639_v34 | 0.9199 |
| Listeria_monocytogenes_J1-220_930782                     | Listeria_monocytogenes_1639_v34 | 0.9309 |
| Listeria_monocytogenes_J0161_393130                      | Listeria_monocytogenes_1639_v34 | 0.9668 |
| Listeria_monocytogenes_HCC23_552536                      | Listeria_monocytogenes_1639_v34 | 0.9087 |
| Listeria_monocytogenes_FSL_R2-561_393126                 | Listeria_monocytogenes_1639_v34 | 0.9505 |
| Listeria_monocytogenes_FSL_J1-208_393119                 | Listeria_monocytogenes_1639_v34 | 0.8941 |
| Listeria_monocytogenes_FSL_J1-175_393118                 | Listeria_monocytogenes_1639_v34 | 0.9379 |
| Listeria_monocytogenes_Finland_1998_393127               | Listeria_monocytogenes_1639_v34 | 0.9512 |
| Listeria_monocytogenes_EGD-e_169963_v1                   | Listeria_monocytogenes_1639_v34 | 0.9478 |
| Listeria_monocytogenes_EGD-e_169963                      | Listeria_monocytogenes_1639_v34 | 0.9482 |
| Listeria_monocytogenes_EGD_1334565                       | Listeria_monocytogenes_1639_v34 | 0.9521 |
| Listeria_monocytogenes_CFSAN002349_1299895               | Listeria_monocytogenes_1639_v34 | 0.9278 |
| Listeria_monocytogenes_ATCC_19117_882095_v1              | Listeria_monocytogenes_1639_v34 | 0.934  |
| Listeria_monocytogenes_ATCC_19117_882095                 | Listeria_monocytogenes_1639_v34 | 0.9339 |
| Listeria_monocytogenes_6179_1288295                      | Listeria_monocytogenes_1639_v34 | 0.9523 |
| Listeria_monocytogenes_1639_v9                           | Listeria_monocytogenes_1639_v34 | 0.9248 |
| Listeria_monocytogenes_1639_v99                          | Listeria_monocytogenes_1639_v34 | 0.9218 |
| Listeria_monocytogenes_1639_v98                          | Listeria_monocytogenes_1639_v34 | 0.9464 |
| Listeria_monocytogenes_1639_v97                          | Listeria_monocytogenes_1639_v34 | 0.9279 |
| Listeria_monocytogenes_1639_v96                          | Listeria_monocytogenes_1639_v34 | 0.9204 |
| Listeria_monocytogenes_1639_v95                          | Listeria_monocytogenes_1639_v34 | 0.9204 |
| Listeria_monocytogenes_1639_v94                          | Listeria_monocytogenes_1639_v34 | 0.9208 |
| Listeria_monocytogenes_1639_v93                          | Listeria_monocytogenes_1639_v34 | 0.943  |
| Listeria_monocytogenes_1639_v92                          | Listeria_monocytogenes_1639_v34 | 0.9226 |
| Listeria_monocytogenes_1639_v91                          | Listeria_monocytogenes_1639_v34 | 0.9239 |
| Listeria_monocytogenes_1639_v90                          | Listeria_monocytogenes_1639_v34 | 0.9464 |
| Listeria_monocytogenes_1639_v8                           | Listeria_monocytogenes_1639_v34 | 0.9361 |
| Listeria_monocytogenes_1639_v89                          | Listeria_monocytogenes_1639_v34 | 0.9276 |
| Listeria_monocytogenes_1639_v88                          | Listeria_monocytogenes_1639_v34 | 0.9526 |
| Listeria_monocytogenes_1639_v87                          | Listeria_monocytogenes_1639_v34 | 0.9457 |
| Listeria_monocytogenes_1639_v86                          | Listeria_monocytogenes_1639_v34 | 0.945  |
| Listeria_monocytogenes_1639_v85                          | Listeria_monocytogenes_1639_v34 | 0.9257 |
| Listeria_monocytogenes_1639_v84                          | Listeria_monocytogenes_1639_v34 | 0.9547 |
| Listeria_monocytogenes_1639_v83                          | Listeria_monocytogenes_1639_v34 | 0.9295 |
| Listeria_monocytogenes_1639_v82                          | Listeria_monocytogenes_1639_v34 | 0.9288 |
| Listeria_monocytogenes_1639_v81                          | Listeria_monocytogenes_1639_v34 | 0.9574 |
| Listeria_monocytogenes_1639_v80                          | Listeria_monocytogenes_1639_v34 | 0.935  |
| Listeria_monocytogenes_1639_v7                           | Listeria_monocytogenes_1639_v34 | 0.9361 |
| Listeria_monocytogenes_1639_v79                          | Listeria_monocytogenes_1639_v34 | 0.9549 |
| Listeria_monocytogenes_1639_v78                          | Listeria_monocytogenes_1639_v34 | 0.957  |
| Listeria_monocytogenes_1639_v77                          | Listeria_monocytogenes_1639_v34 | 0.9476 |
| Listeria_monocytogenes_1639_v76                          | Listeria_monocytogenes_1639_v34 | 0.9515 |
| Listeria_monocytogenes_1639_v75                          | Listeria_monocytogenes_1639_v34 | 0.909  |
| Listeria_monocytogenes_1639_v74                          | Listeria_monocytogenes_1639_v34 | 0.9295 |
| Listeria_monocytogenes_1639_v73                          | Listeria_monocytogenes_1639_v34 | 0.9431 |
| Listeria_monocytogenes_1639_v72                          | Listeria_monocytogenes_1639_v34 | 0.9283 |

|                                                          |                                 |        |
|----------------------------------------------------------|---------------------------------|--------|
| Listeria_monocytogenes_1639_v71                          | Listeria_monocytogenes_1639_v34 | 0.9454 |
| Listeria_monocytogenes_1639_v70                          | Listeria_monocytogenes_1639_v34 | 0.9517 |
| Listeria_monocytogenes_1639_v6                           | Listeria_monocytogenes_1639_v34 | 0.9354 |
| Listeria_monocytogenes_1639_v69                          | Listeria_monocytogenes_1639_v34 | 0.9266 |
| Listeria_monocytogenes_1639_v68                          | Listeria_monocytogenes_1639_v34 | 0.9781 |
| Listeria_monocytogenes_1639_v67                          | Listeria_monocytogenes_1639_v34 | 0.9403 |
| Listeria_monocytogenes_1639_v66                          | Listeria_monocytogenes_1639_v34 | 0.9526 |
| Listeria_monocytogenes_1639_v65                          | Listeria_monocytogenes_1639_v34 | 0.9436 |
| Listeria_monocytogenes_1639_v64                          | Listeria_monocytogenes_1639_v34 | 0.9511 |
| Listeria_monocytogenes_1639_v63                          | Listeria_monocytogenes_1639_v34 | 0.9359 |
| Listeria_monocytogenes_1639_v62                          | Listeria_monocytogenes_1639_v34 | 0.9542 |
| Listeria_monocytogenes_1639_v61                          | Listeria_monocytogenes_1639_v34 | 0.9499 |
| Listeria_monocytogenes_1639_v60                          | Listeria_monocytogenes_1639_v34 | 0.9703 |
| Listeria_monocytogenes_1639_v5                           | Listeria_monocytogenes_1639_v34 | 0.8893 |
| Listeria_monocytogenes_1639_v59                          | Listeria_monocytogenes_1639_v34 | 0.9347 |
| Listeria_monocytogenes_1639_v58                          | Listeria_monocytogenes_1639_v34 | 0.9288 |
| Listeria_monocytogenes_1639_v57                          | Listeria_monocytogenes_1639_v34 | 0.9174 |
| Listeria_monocytogenes_1639_v56                          | Listeria_monocytogenes_1639_v34 | 0.9358 |
| Listeria_monocytogenes_1639_v55                          | Listeria_monocytogenes_1639_v34 | 0.9155 |
| Listeria_monocytogenes_1639_v54                          | Listeria_monocytogenes_1639_v34 | 0.9171 |
| Listeria_monocytogenes_1639_v53                          | Listeria_monocytogenes_1639_v34 | 0.9399 |
| Listeria_monocytogenes_1639_v52                          | Listeria_monocytogenes_1639_v34 | 0.9271 |
| Listeria_monocytogenes_1639_v51                          | Listeria_monocytogenes_1639_v34 | 0.9258 |
| Listeria_monocytogenes_1639_v50                          | Listeria_monocytogenes_1639_v34 | 0.9456 |
| Listeria_monocytogenes_1639_v4                           | Listeria_monocytogenes_1639_v34 | 0.9014 |
| Listeria_monocytogenes_1639_v49                          | Listeria_monocytogenes_1639_v34 | 0.923  |
| Listeria_monocytogenes_1639_v48                          | Listeria_monocytogenes_1639_v34 | 0.9485 |
| Listeria_monocytogenes_1639_v47                          | Listeria_monocytogenes_1639_v34 | 0.9471 |
| Listeria_monocytogenes_1639_v46                          | Listeria_monocytogenes_1639_v34 | 0.98   |
| Listeria_monocytogenes_1639_v45                          | Listeria_monocytogenes_1639_v34 | 0.9378 |
| Listeria_monocytogenes_1639_v44                          | Listeria_monocytogenes_1639_v34 | 0.9467 |
| Listeria_monocytogenes_1639_v43                          | Listeria_monocytogenes_1639_v34 | 0.9467 |
| Listeria_monocytogenes_1639_v42                          | Listeria_monocytogenes_1639_v34 | 0.939  |
| Listeria_monocytogenes_1639_v41                          | Listeria_monocytogenes_1639_v34 | 0.9238 |
| Listeria_monocytogenes_1639_v40                          | Listeria_monocytogenes_1639_v34 | 0.9468 |
| Listeria_monocytogenes_1639_v3                           | Listeria_monocytogenes_1639_v34 | 0.9018 |
| Listeria_monocytogenes_1639_v39                          | Listeria_monocytogenes_1639_v34 | 0.9384 |
| Listeria_monocytogenes_1639_v38                          | Listeria_monocytogenes_1639_v34 | 0.9477 |
| Listeria_monocytogenes_1639_v37                          | Listeria_monocytogenes_1639_v34 | 0.9315 |
| Listeria_monocytogenes_1639_v36                          | Listeria_monocytogenes_1639_v34 | 0.9393 |
| Listeria_monocytogenes_1639_v35                          | Listeria_monocytogenes_1639_v34 | 0.9464 |
| Listeria_monocytogenes_1639_v34                          | Listeria_monocytogenes_1639_v34 | 0.0695 |
| Listeria_welshimeri_1643                                 | Listeria_monocytogenes_1639_v35 | 0.8685 |
| Listeria_welshimeri_serovar_6b_str_SLCC5334_386043       | Listeria_monocytogenes_1639_v35 | 0.8681 |
| Listeria_seeligeri_serovar_1_2b_str_SLCC3954_683837      | Listeria_monocytogenes_1639_v35 | 0.8762 |
| Listeria_seeligeri_FSL_S4-171_702452                     | Listeria_monocytogenes_1639_v35 | 0.8099 |
| Listeria_seeligeri_FSL_N1-067_702453                     | Listeria_monocytogenes_1639_v35 | 0.8287 |
| Listeria_seeligeri_1640_v1                               | Listeria_monocytogenes_1639_v35 | 0.8797 |
| Listeria_seeligeri_1640                                  | Listeria_monocytogenes_1639_v35 | 0.8678 |
| Listeria_monocytogenes_WSLC1042_1457188                  | Listeria_monocytogenes_1639_v35 | 0.9252 |
| Listeria_monocytogenes_WSLC1001_1457187                  | Listeria_monocytogenes_1639_v35 | 0.9607 |
| Listeria_monocytogenes_SLCC7179_879090                   | Listeria_monocytogenes_1639_v35 | 0.9479 |
| Listeria_monocytogenes_SLCC5850_882096                   | Listeria_monocytogenes_1639_v35 | 0.9545 |
| Listeria_monocytogenes_SLCC2755_932919                   | Listeria_monocytogenes_1639_v35 | 0.9236 |
| Listeria_monocytogenes_SLCC2540_879089                   | Listeria_monocytogenes_1639_v35 | 0.9427 |
| Listeria_monocytogenes_SLCC2479_882020                   | Listeria_monocytogenes_1639_v35 | 0.9822 |
| Listeria_monocytogenes_SLCC2378_879088                   | Listeria_monocytogenes_1639_v35 | 0.9263 |
| Listeria_monocytogenes_SLCC2376_882097                   | Listeria_monocytogenes_1639_v35 | 0.9322 |
| Listeria_monocytogenes_SLCC2372_932920                   | Listeria_monocytogenes_1639_v35 | 0.9749 |
| Listeria_monocytogenes_serotype_4b_str_LL195_1230340     | Listeria_monocytogenes_1639_v35 | 0.9307 |
| Listeria_monocytogenes_serotype_4b_str_LIS0087_1134669   | Listeria_monocytogenes_1639_v35 | 0.9363 |
| Listeria_monocytogenes_serotype_4b_str_F2365_265669      | Listeria_monocytogenes_1639_v35 | 0.9307 |
| Listeria_monocytogenes_serotype_4b_str_CLIP_80459_568819 | Listeria_monocytogenes_1639_v35 | 0.9333 |
| Listeria_monocytogenes_serotype_4b_str_81-0861_1196161   | Listeria_monocytogenes_1639_v35 | 0.9189 |
| Listeria_monocytogenes_serotype_4b_str_81-0592_1196160   | Listeria_monocytogenes_1639_v35 | 0.9199 |
| Listeria_monocytogenes_serotype_4b_str_81-0558_1196159   | Listeria_monocytogenes_1639_v35 | 0.9203 |
| Listeria_monocytogenes_serotype_4b_str_10-0809_1196162   | Listeria_monocytogenes_1639_v35 | 0.9199 |
| Listeria_monocytogenes_serotype_4b_str_02-6680_1196175   | Listeria_monocytogenes_1639_v35 | 0.9304 |
| Listeria_monocytogenes_serotype_4b_str_02-6679_1196174   | Listeria_monocytogenes_1639_v35 | 0.9304 |
| Listeria_monocytogenes_serotype_4b_str_02-1792_1196173   | Listeria_monocytogenes_1639_v35 | 0.9207 |
| Listeria_monocytogenes_serotype_4b_str_02-1289_1196172   | Listeria_monocytogenes_1639_v35 | 0.9207 |
| Listeria_monocytogenes_serotype_4b_str_02-1103_1196171   | Listeria_monocytogenes_1639_v35 | 0.9207 |
| Listeria_monocytogenes_serotype_3c_str_10-5027_1196195   | Listeria_monocytogenes_1639_v35 | 0.9732 |
| Listeria_monocytogenes_serotype_1_2c_str_10-5026_1196194 | Listeria_monocytogenes_1639_v35 | 0.9747 |
| Listeria_monocytogenes_serotype_1_2c_str_10-5025_1196193 | Listeria_monocytogenes_1639_v35 | 0.9747 |
| Listeria_monocytogenes_serotype_1_2b_str_10-0811_1196164 | Listeria_monocytogenes_1639_v35 | 0.943  |
| Listeria_monocytogenes_serotype_1_2b_str_10-0810_1196163 | Listeria_monocytogenes_1639_v35 | 0.943  |
| Listeria_monocytogenes_serotype_1_2a_str_99-6370_1196179 | Listeria_monocytogenes_1639_v35 | 0.9446 |
| Listeria_monocytogenes_serotype_1_2a_str_98-2035_1196178 | Listeria_monocytogenes_1639_v35 | 0.9446 |
| Listeria_monocytogenes_serotype_1_2a_str_95-0093_1196177 | Listeria_monocytogenes_1639_v35 | 0.9428 |
| Listeria_monocytogenes_serotype_1_2a_str_88-0478_1196176 | Listeria_monocytogenes_1639_v35 | 0.9435 |
| Listeria_monocytogenes_serotype_1_2a_str_10-5024_1196192 | Listeria_monocytogenes_1639_v35 | 0.942  |
| Listeria_monocytogenes_serotype_1_2a_str_10-4758_1196168 | Listeria_monocytogenes_1639_v35 | 0.958  |
| Listeria_monocytogenes_serotype_1_2a_str_10-4754_1196167 | Listeria_monocytogenes_1639_v35 | 0.9583 |
| Listeria_monocytogenes_serotype_1_2a_str_10-1321_1196191 | Listeria_monocytogenes_1639_v35 | 0.942  |
| Listeria_monocytogenes_serotype_1_2a_str_10-1047_1196190 | Listeria_monocytogenes_1639_v35 | 0.942  |
| Listeria_monocytogenes_serotype_1_2a_str_10-1046_1196189 | Listeria_monocytogenes_1639_v35 | 0.942  |
| Listeria_monocytogenes_serotype_1_2a_str_10-0934_1196170 | Listeria_monocytogenes_1639_v35 | 0.9559 |
| Listeria_monocytogenes_serotype_1_2a_str_10-0933_1196169 | Listeria_monocytogenes_1639_v35 | 0.9559 |
| Listeria_monocytogenes_serotype_1_2a_str_10-0815_1196188 | Listeria_monocytogenes_1639_v35 | 0.9452 |
| Listeria_monocytogenes_serotype_1_2a_str_10-0814_1196187 | Listeria_monocytogenes_1639_v35 | 0.942  |

|                                                          |                                 |        |
|----------------------------------------------------------|---------------------------------|--------|
| Listeria_monocytogenes_serotype_1_2a_str_10-0813_1196166 | Listeria_monocytogenes_1639_v35 | 0.9496 |
| Listeria_monocytogenes_serotype_1_2a_str_10-0812_1196165 | Listeria_monocytogenes_1639_v35 | 0.9496 |
| Listeria_monocytogenes_serotype_1_2a_str_08-7669_1196186 | Listeria_monocytogenes_1639_v35 | 0.9388 |
| Listeria_monocytogenes_serotype_1_2a_str_08-7374_1196185 | Listeria_monocytogenes_1639_v35 | 0.942  |
| Listeria_monocytogenes_serotype_1_2a_str_08-6997_1196184 | Listeria_monocytogenes_1639_v35 | 0.9452 |
| Listeria_monocytogenes_serotype_1_2a_str_08-6569_1196183 | Listeria_monocytogenes_1639_v35 | 0.9452 |
| Listeria_monocytogenes_serotype_1_2a_str_08-6056_1196182 | Listeria_monocytogenes_1639_v35 | 0.9452 |
| Listeria_monocytogenes_serotype_1_2a_str_04-5457_1196181 | Listeria_monocytogenes_1639_v35 | 0.942  |
| Listeria_monocytogenes_serotype_1_2a_str_02-5993_1196180 | Listeria_monocytogenes_1639_v35 | 0.942  |
| Listeria_monocytogenes_R479a_1437838                     | Listeria_monocytogenes_1639_v35 | 0.9399 |
| Listeria_monocytogenes_N53-1_1234142                     | Listeria_monocytogenes_1639_v35 | 0.905  |
| Listeria_monocytogenes_M7_1030009                        | Listeria_monocytogenes_1639_v35 | 0.9067 |
| Listeria_monocytogenes_LO28_393132                       | Listeria_monocytogenes_1639_v35 | 0.9811 |
| Listeria_monocytogenes_L99_563174                        | Listeria_monocytogenes_1639_v35 | 0.907  |
| Listeria_monocytogenes_L312_882094                       | Listeria_monocytogenes_1639_v35 | 0.9333 |
| Listeria_monocytogenes_J1816_930781                      | Listeria_monocytogenes_1639_v35 | 0.9165 |
| Listeria_monocytogenes_J1-220_930782                     | Listeria_monocytogenes_1639_v35 | 0.9165 |
| Listeria_monocytogenes_J0161_393130                      | Listeria_monocytogenes_1639_v35 | 0.9376 |
| Listeria_monocytogenes_HCC23_552536                      | Listeria_monocytogenes_1639_v35 | 0.9067 |
| Listeria_monocytogenes_FSL_R2-561_393126                 | Listeria_monocytogenes_1639_v35 | 0.9729 |
| Listeria_monocytogenes_FSL_J1-208_393119                 | Listeria_monocytogenes_1639_v35 | 0.8973 |
| Listeria_monocytogenes_FSL_J1-175_393118                 | Listeria_monocytogenes_1639_v35 | 0.9421 |
| Listeria_monocytogenes_Finland_1998_393127               | Listeria_monocytogenes_1639_v35 | 0.9498 |
| Listeria_monocytogenes_EGD-e_169963_v1                   | Listeria_monocytogenes_1639_v35 | 0.9648 |
| Listeria_monocytogenes_EGD-e_169963                      | Listeria_monocytogenes_1639_v35 | 0.9648 |
| Listeria_monocytogenes_EGD_1334565                       | Listeria_monocytogenes_1639_v35 | 0.9552 |
| Listeria_monocytogenes_CFSAN002349_1299895               | Listeria_monocytogenes_1639_v35 | 0.9339 |
| Listeria_monocytogenes_ATCC_19117_882095_v1              | Listeria_monocytogenes_1639_v35 | 0.9264 |
| Listeria_monocytogenes_ATCC_19117_882095                 | Listeria_monocytogenes_1639_v35 | 0.926  |
| Listeria_monocytogenes_6179_1288295                      | Listeria_monocytogenes_1639_v35 | 0.9363 |
| Listeria_monocytogenes_1639_v9                           | Listeria_monocytogenes_1639_v35 | 0.9189 |
| Listeria_monocytogenes_1639_v99                          | Listeria_monocytogenes_1639_v35 | 0.9181 |
| Listeria_monocytogenes_1639_v98                          | Listeria_monocytogenes_1639_v35 | 0.9461 |
| Listeria_monocytogenes_1639_v97                          | Listeria_monocytogenes_1639_v35 | 0.9211 |
| Listeria_monocytogenes_1639_v96                          | Listeria_monocytogenes_1639_v35 | 0.9177 |
| Listeria_monocytogenes_1639_v95                          | Listeria_monocytogenes_1639_v35 | 0.9178 |
| Listeria_monocytogenes_1639_v94                          | Listeria_monocytogenes_1639_v35 | 0.9181 |
| Listeria_monocytogenes_1639_v93                          | Listeria_monocytogenes_1639_v35 | 0.9438 |
| Listeria_monocytogenes_1639_v92                          | Listeria_monocytogenes_1639_v35 | 0.9185 |
| Listeria_monocytogenes_1639_v91                          | Listeria_monocytogenes_1639_v35 | 0.922  |
| Listeria_monocytogenes_1639_v90                          | Listeria_monocytogenes_1639_v35 | 0.9461 |
| Listeria_monocytogenes_1639_v8                           | Listeria_monocytogenes_1639_v35 | 0.9332 |
| Listeria_monocytogenes_1639_v89                          | Listeria_monocytogenes_1639_v35 | 0.9261 |
| Listeria_monocytogenes_1639_v88                          | Listeria_monocytogenes_1639_v35 | 0.9534 |
| Listeria_monocytogenes_1639_v87                          | Listeria_monocytogenes_1639_v35 | 0.9451 |
| Listeria_monocytogenes_1639_v86                          | Listeria_monocytogenes_1639_v35 | 0.9447 |
| Listeria_monocytogenes_1639_v85                          | Listeria_monocytogenes_1639_v35 | 0.9178 |
| Listeria_monocytogenes_1639_v84                          | Listeria_monocytogenes_1639_v35 | 0.9533 |
| Listeria_monocytogenes_1639_v83                          | Listeria_monocytogenes_1639_v35 | 0.9183 |
| Listeria_monocytogenes_1639_v82                          | Listeria_monocytogenes_1639_v35 | 0.918  |
| Listeria_monocytogenes_1639_v81                          | Listeria_monocytogenes_1639_v35 | 0.9478 |
| Listeria_monocytogenes_1639_v80                          | Listeria_monocytogenes_1639_v35 | 0.9387 |
| Listeria_monocytogenes_1639_v7                           | Listeria_monocytogenes_1639_v35 | 0.9332 |
| Listeria_monocytogenes_1639_v79                          | Listeria_monocytogenes_1639_v35 | 0.9472 |
| Listeria_monocytogenes_1639_v78                          | Listeria_monocytogenes_1639_v35 | 0.9482 |
| Listeria_monocytogenes_1639_v77                          | Listeria_monocytogenes_1639_v35 | 0.939  |
| Listeria_monocytogenes_1639_v76                          | Listeria_monocytogenes_1639_v35 | 0.9516 |
| Listeria_monocytogenes_1639_v75                          | Listeria_monocytogenes_1639_v35 | 0.907  |
| Listeria_monocytogenes_1639_v74                          | Listeria_monocytogenes_1639_v35 | 0.9354 |
| Listeria_monocytogenes_1639_v73                          | Listeria_monocytogenes_1639_v35 | 0.9697 |
| Listeria_monocytogenes_1639_v72                          | Listeria_monocytogenes_1639_v35 | 0.9164 |
| Listeria_monocytogenes_1639_v71                          | Listeria_monocytogenes_1639_v35 | 0.9348 |
| Listeria_monocytogenes_1639_v70                          | Listeria_monocytogenes_1639_v35 | 0.9752 |
| Listeria_monocytogenes_1639_v6                           | Listeria_monocytogenes_1639_v35 | 0.9329 |
| Listeria_monocytogenes_1639_v69                          | Listeria_monocytogenes_1639_v35 | 0.9199 |
| Listeria_monocytogenes_1639_v68                          | Listeria_monocytogenes_1639_v35 | 0.9407 |
| Listeria_monocytogenes_1639_v67                          | Listeria_monocytogenes_1639_v35 | 0.9392 |
| Listeria_monocytogenes_1639_v66                          | Listeria_monocytogenes_1639_v35 | 0.9569 |
| Listeria_monocytogenes_1639_v65                          | Listeria_monocytogenes_1639_v35 | 0.9522 |
| Listeria_monocytogenes_1639_v64                          | Listeria_monocytogenes_1639_v35 | 0.9576 |
| Listeria_monocytogenes_1639_v63                          | Listeria_monocytogenes_1639_v35 | 0.9351 |
| Listeria_monocytogenes_1639_v62                          | Listeria_monocytogenes_1639_v35 | 0.9506 |
| Listeria_monocytogenes_1639_v61                          | Listeria_monocytogenes_1639_v35 | 0.9433 |
| Listeria_monocytogenes_1639_v60                          | Listeria_monocytogenes_1639_v35 | 0.9392 |
| Listeria_monocytogenes_1639_v5                           | Listeria_monocytogenes_1639_v35 | 0.9012 |
| Listeria_monocytogenes_1639_v59                          | Listeria_monocytogenes_1639_v35 | 0.9239 |
| Listeria_monocytogenes_1639_v58                          | Listeria_monocytogenes_1639_v35 | 0.9243 |
| Listeria_monocytogenes_1639_v57                          | Listeria_monocytogenes_1639_v35 | 0.9137 |
| Listeria_monocytogenes_1639_v56                          | Listeria_monocytogenes_1639_v35 | 0.9194 |
| Listeria_monocytogenes_1639_v55                          | Listeria_monocytogenes_1639_v35 | 0.9114 |
| Listeria_monocytogenes_1639_v54                          | Listeria_monocytogenes_1639_v35 | 0.9144 |
| Listeria_monocytogenes_1639_v53                          | Listeria_monocytogenes_1639_v35 | 0.9381 |
| Listeria_monocytogenes_1639_v52                          | Listeria_monocytogenes_1639_v35 | 0.9204 |
| Listeria_monocytogenes_1639_v51                          | Listeria_monocytogenes_1639_v35 | 0.9136 |
| Listeria_monocytogenes_1639_v50                          | Listeria_monocytogenes_1639_v35 | 0.9405 |
| Listeria_monocytogenes_1639_v4                           | Listeria_monocytogenes_1639_v35 | 0.9139 |
| Listeria_monocytogenes_1639_v49                          | Listeria_monocytogenes_1639_v35 | 0.9207 |
| Listeria_monocytogenes_1639_v48                          | Listeria_monocytogenes_1639_v35 | 0.9782 |
| Listeria_monocytogenes_1639_v47                          | Listeria_monocytogenes_1639_v35 | 0.942  |
| Listeria_monocytogenes_1639_v46                          | Listeria_monocytogenes_1639_v35 | 0.9396 |
| Listeria_monocytogenes_1639_v45                          | Listeria_monocytogenes_1639_v35 | 0.9331 |

|                                                          |                                 |        |
|----------------------------------------------------------|---------------------------------|--------|
| Listeria_monocytogenes_1639_v44                          | Listeria_monocytogenes_1639_v35 | 0.942  |
| Listeria_monocytogenes_1639_v43                          | Listeria_monocytogenes_1639_v35 | 0.942  |
| Listeria_monocytogenes_1639_v42                          | Listeria_monocytogenes_1639_v35 | 0.9379 |
| Listeria_monocytogenes_1639_v41                          | Listeria_monocytogenes_1639_v35 | 0.9303 |
| Listeria_monocytogenes_1639_v40                          | Listeria_monocytogenes_1639_v35 | 0.9903 |
| Listeria_monocytogenes_1639_v3                           | Listeria_monocytogenes_1639_v35 | 0.9143 |
| Listeria_monocytogenes_1639_v39                          | Listeria_monocytogenes_1639_v35 | 0.9388 |
| Listeria_monocytogenes_1639_v38                          | Listeria_monocytogenes_1639_v35 | 0.9682 |
| Listeria_monocytogenes_1639_v37                          | Listeria_monocytogenes_1639_v35 | 0.9569 |
| Listeria_monocytogenes_1639_v36                          | Listeria_monocytogenes_1639_v35 | 0.9504 |
| Listeria_monocytogenes_1639_v35                          | Listeria_monocytogenes_1639_v35 | 0.0703 |
| Listeria_welshimeri_1643                                 | Listeria_monocytogenes_1639_v36 | 0.8602 |
| Listeria_welshimeri_serovar_6b_str_SLCC5334_386043       | Listeria_monocytogenes_1639_v36 | 0.8599 |
| Listeria_seeligeri_serovar_1_2b_str_SLCC3954_683837      | Listeria_monocytogenes_1639_v36 | 0.8689 |
| Listeria_seeligeri_FSL_S4-171_702452                     | Listeria_monocytogenes_1639_v36 | 0.7995 |
| Listeria_seeligeri_FSL_N1-067_702453                     | Listeria_monocytogenes_1639_v36 | 0.8198 |
| Listeria_seeligeri_1640_v1                               | Listeria_monocytogenes_1639_v36 | 0.8667 |
| Listeria_seeligeri_1640                                  | Listeria_monocytogenes_1639_v36 | 0.8637 |
| Listeria_monocytogenes_WSLC1042_1457188                  | Listeria_monocytogenes_1639_v36 | 0.9142 |
| Listeria_monocytogenes_WSLC1001_1457187                  | Listeria_monocytogenes_1639_v36 | 0.9508 |
| Listeria_monocytogenes_SLCC7179_879090                   | Listeria_monocytogenes_1639_v36 | 0.9384 |
| Listeria_monocytogenes_SLCC5850_882096                   | Listeria_monocytogenes_1639_v36 | 0.9498 |
| Listeria_monocytogenes_SLCC2755_932919                   | Listeria_monocytogenes_1639_v36 | 0.9414 |
| Listeria_monocytogenes_SLCC2540_879089                   | Listeria_monocytogenes_1639_v36 | 0.9282 |
| Listeria_monocytogenes_SLCC2479_882020                   | Listeria_monocytogenes_1639_v36 | 0.9412 |
| Listeria_monocytogenes_SLCC2378_879088                   | Listeria_monocytogenes_1639_v36 | 0.9152 |
| Listeria_monocytogenes_SLCC2376_882097                   | Listeria_monocytogenes_1639_v36 | 0.9235 |
| Listeria_monocytogenes_SLCC2372_932920                   | Listeria_monocytogenes_1639_v36 | 0.9493 |
| Listeria_monocytogenes_serotype_4b_str_LL195_1230340     | Listeria_monocytogenes_1639_v36 | 0.9199 |
| Listeria_monocytogenes_serotype_4b_str_LIS0087_1134669   | Listeria_monocytogenes_1639_v36 | 0.9306 |
| Listeria_monocytogenes_serotype_4b_str_F2365_265669      | Listeria_monocytogenes_1639_v36 | 0.9199 |
| Listeria_monocytogenes_serotype_4b_str_CLIP_80459_568819 | Listeria_monocytogenes_1639_v36 | 0.9235 |
| Listeria_monocytogenes_serotype_4b_str_81-0861_1196161   | Listeria_monocytogenes_1639_v36 | 0.9084 |
| Listeria_monocytogenes_serotype_4b_str_81-0592_1196160   | Listeria_monocytogenes_1639_v36 | 0.9094 |
| Listeria_monocytogenes_serotype_4b_str_81-0558_1196159   | Listeria_monocytogenes_1639_v36 | 0.9097 |
| Listeria_monocytogenes_serotype_4b_str_10-0809_1196162   | Listeria_monocytogenes_1639_v36 | 0.9094 |
| Listeria_monocytogenes_serotype_4b_str_02-6680_1196175   | Listeria_monocytogenes_1639_v36 | 0.9211 |
| Listeria_monocytogenes_serotype_4b_str_02-6679_1196174   | Listeria_monocytogenes_1639_v36 | 0.9211 |
| Listeria_monocytogenes_serotype_4b_str_02-1792_1196173   | Listeria_monocytogenes_1639_v36 | 0.9101 |
| Listeria_monocytogenes_serotype_4b_str_02-1289_1196172   | Listeria_monocytogenes_1639_v36 | 0.9101 |
| Listeria_monocytogenes_serotype_4b_str_02-1103_1196171   | Listeria_monocytogenes_1639_v36 | 0.9101 |
| Listeria_monocytogenes_serotype_3c_str_10-5027_1196195   | Listeria_monocytogenes_1639_v36 | 0.9378 |
| Listeria_monocytogenes_serotype_1_2c_str_10-5026_1196194 | Listeria_monocytogenes_1639_v36 | 0.9382 |
| Listeria_monocytogenes_serotype_1_2c_str_10-5025_1196193 | Listeria_monocytogenes_1639_v36 | 0.9382 |
| Listeria_monocytogenes_serotype_1_2b_str_10-0811_1196164 | Listeria_monocytogenes_1639_v36 | 0.9293 |
| Listeria_monocytogenes_serotype_1_2b_str_10-0810_1196163 | Listeria_monocytogenes_1639_v36 | 0.9293 |
| Listeria_monocytogenes_serotype_1_2a_str_99-6370_1196179 | Listeria_monocytogenes_1639_v36 | 0.9394 |
| Listeria_monocytogenes_serotype_1_2a_str_98-2035_1196178 | Listeria_monocytogenes_1639_v36 | 0.9394 |
| Listeria_monocytogenes_serotype_1_2a_str_95-0093_1196177 | Listeria_monocytogenes_1639_v36 | 0.9339 |
| Listeria_monocytogenes_serotype_1_2a_str_88-0478_1196176 | Listeria_monocytogenes_1639_v36 | 0.9346 |
| Listeria_monocytogenes_serotype_1_2a_str_10-5024_1196192 | Listeria_monocytogenes_1639_v36 | 0.9343 |
| Listeria_monocytogenes_serotype_1_2a_str_10-4758_1196168 | Listeria_monocytogenes_1639_v36 | 0.9439 |
| Listeria_monocytogenes_serotype_1_2a_str_10-4754_1196167 | Listeria_monocytogenes_1639_v36 | 0.9443 |
| Listeria_monocytogenes_serotype_1_2a_str_10-1321_1196191 | Listeria_monocytogenes_1639_v36 | 0.9343 |
| Listeria_monocytogenes_serotype_1_2a_str_10-1047_1196190 | Listeria_monocytogenes_1639_v36 | 0.9357 |
| Listeria_monocytogenes_serotype_1_2a_str_10-1046_1196189 | Listeria_monocytogenes_1639_v36 | 0.9357 |
| Listeria_monocytogenes_serotype_1_2a_str_10-0934_1196170 | Listeria_monocytogenes_1639_v36 | 0.9466 |
| Listeria_monocytogenes_serotype_1_2a_str_10-0933_1196169 | Listeria_monocytogenes_1639_v36 | 0.9466 |
| Listeria_monocytogenes_serotype_1_2a_str_10-0815_1196188 | Listeria_monocytogenes_1639_v36 | 0.9382 |
| Listeria_monocytogenes_serotype_1_2a_str_10-0814_1196187 | Listeria_monocytogenes_1639_v36 | 0.9343 |
| Listeria_monocytogenes_serotype_1_2a_str_10-0813_1196166 | Listeria_monocytogenes_1639_v36 | 0.9458 |
| Listeria_monocytogenes_serotype_1_2a_str_10-0812_1196165 | Listeria_monocytogenes_1639_v36 | 0.9458 |
| Listeria_monocytogenes_serotype_1_2a_str_08-7669_1196186 | Listeria_monocytogenes_1639_v36 | 0.9328 |
| Listeria_monocytogenes_serotype_1_2a_str_08-7374_1196185 | Listeria_monocytogenes_1639_v36 | 0.9343 |
| Listeria_monocytogenes_serotype_1_2a_str_08-6997_1196184 | Listeria_monocytogenes_1639_v36 | 0.9382 |
| Listeria_monocytogenes_serotype_1_2a_str_08-6569_1196183 | Listeria_monocytogenes_1639_v36 | 0.9382 |
| Listeria_monocytogenes_serotype_1_2a_str_08-6056_1196182 | Listeria_monocytogenes_1639_v36 | 0.9382 |
| Listeria_monocytogenes_serotype_1_2a_str_04-5457_1196181 | Listeria_monocytogenes_1639_v36 | 0.9343 |
| Listeria_monocytogenes_serotype_1_2a_str_02-5993_1196180 | Listeria_monocytogenes_1639_v36 | 0.9343 |
| Listeria_monocytogenes_R479a_1437838                     | Listeria_monocytogenes_1639_v36 | 0.9398 |
| Listeria_monocytogenes_N53-1_1234142                     | Listeria_monocytogenes_1639_v36 | 0.8892 |
| Listeria_monocytogenes_M7_1030009                        | Listeria_monocytogenes_1639_v36 | 0.8997 |
| Listeria_monocytogenes_LO28_393132                       | Listeria_monocytogenes_1639_v36 | 0.9394 |
| Listeria_monocytogenes_L99_563174                        | Listeria_monocytogenes_1639_v36 | 0.9    |
| Listeria_monocytogenes_L312_882094                       | Listeria_monocytogenes_1639_v36 | 0.9235 |
| Listeria_monocytogenes_J1816_930781                      | Listeria_monocytogenes_1639_v36 | 0.9068 |
| Listeria_monocytogenes_J1-220_930782                     | Listeria_monocytogenes_1639_v36 | 0.9079 |
| Listeria_monocytogenes_J0161_393130                      | Listeria_monocytogenes_1639_v36 | 0.9299 |
| Listeria_monocytogenes_HCC23_552536                      | Listeria_monocytogenes_1639_v36 | 0.8997 |
| Listeria_monocytogenes_FSL_R2-561_393126                 | Listeria_monocytogenes_1639_v36 | 0.9368 |
| Listeria_monocytogenes_FSL_J1-208_393119                 | Listeria_monocytogenes_1639_v36 | 0.8895 |
| Listeria_monocytogenes_FSL_J1-175_393118                 | Listeria_monocytogenes_1639_v36 | 0.9286 |
| Listeria_monocytogenes_Finland_1998_393127               | Listeria_monocytogenes_1639_v36 | 0.9451 |
| Listeria_monocytogenes_EGD-e_169963_v1                   | Listeria_monocytogenes_1639_v36 | 0.9351 |
| Listeria_monocytogenes_EGD-e_169963                      | Listeria_monocytogenes_1639_v36 | 0.9351 |
| Listeria_monocytogenes_EGD_1334565                       | Listeria_monocytogenes_1639_v36 | 0.9505 |
| Listeria_monocytogenes_CFSAN002349_1299895               | Listeria_monocytogenes_1639_v36 | 0.9226 |
| Listeria_monocytogenes_ATCC_19117_882095_v1              | Listeria_monocytogenes_1639_v36 | 0.9187 |
| Listeria_monocytogenes_ATCC_19117_882095                 | Listeria_monocytogenes_1639_v36 | 0.9183 |
| Listeria_monocytogenes_6179_1288295                      | Listeria_monocytogenes_1639_v36 | 0.9359 |
| Listeria_monocytogenes_1639_v9                           | Listeria_monocytogenes_1639_v36 | 0.9061 |

|                                                          |                                 |        |
|----------------------------------------------------------|---------------------------------|--------|
| Listeria_monocytogenes_1639_v99                          | Listeria_monocytogenes_1639_v36 | 0.9164 |
| Listeria_monocytogenes_1639_v98                          | Listeria_monocytogenes_1639_v36 | 0.9353 |
| Listeria_monocytogenes_1639_v97                          | Listeria_monocytogenes_1639_v36 | 0.9146 |
| Listeria_monocytogenes_1639_v96                          | Listeria_monocytogenes_1639_v36 | 0.9157 |
| Listeria_monocytogenes_1639_v95                          | Listeria_monocytogenes_1639_v36 | 0.9158 |
| Listeria_monocytogenes_1639_v94                          | Listeria_monocytogenes_1639_v36 | 0.9164 |
| Listeria_monocytogenes_1639_v93                          | Listeria_monocytogenes_1639_v36 | 0.9419 |
| Listeria_monocytogenes_1639_v92                          | Listeria_monocytogenes_1639_v36 | 0.9172 |
| Listeria_monocytogenes_1639_v91                          | Listeria_monocytogenes_1639_v36 | 0.9119 |
| Listeria_monocytogenes_1639_v90                          | Listeria_monocytogenes_1639_v36 | 0.9353 |
| Listeria_monocytogenes_1639_v8                           | Listeria_monocytogenes_1639_v36 | 0.9397 |
| Listeria_monocytogenes_1639_v89                          | Listeria_monocytogenes_1639_v36 | 0.9195 |
| Listeria_monocytogenes_1639_v88                          | Listeria_monocytogenes_1639_v36 | 0.944  |
| Listeria_monocytogenes_1639_v87                          | Listeria_monocytogenes_1639_v36 | 0.9398 |
| Listeria_monocytogenes_1639_v86                          | Listeria_monocytogenes_1639_v36 | 0.9394 |
| Listeria_monocytogenes_1639_v85                          | Listeria_monocytogenes_1639_v36 | 0.907  |
| Listeria_monocytogenes_1639_v84                          | Listeria_monocytogenes_1639_v36 | 0.9424 |
| Listeria_monocytogenes_1639_v83                          | Listeria_monocytogenes_1639_v36 | 0.9104 |
| Listeria_monocytogenes_1639_v82                          | Listeria_monocytogenes_1639_v36 | 0.9101 |
| Listeria_monocytogenes_1639_v81                          | Listeria_monocytogenes_1639_v36 | 0.9418 |
| Listeria_monocytogenes_1639_v80                          | Listeria_monocytogenes_1639_v36 | 0.925  |
| Listeria_monocytogenes_1639_v7                           | Listeria_monocytogenes_1639_v36 | 0.9397 |
| Listeria_monocytogenes_1639_v79                          | Listeria_monocytogenes_1639_v36 | 0.9422 |
| Listeria_monocytogenes_1639_v78                          | Listeria_monocytogenes_1639_v36 | 0.9411 |
| Listeria_monocytogenes_1639_v77                          | Listeria_monocytogenes_1639_v36 | 0.9301 |
| Listeria_monocytogenes_1639_v76                          | Listeria_monocytogenes_1639_v36 | 0.9407 |
| Listeria_monocytogenes_1639_v75                          | Listeria_monocytogenes_1639_v36 | 0.9    |
| Listeria_monocytogenes_1639_v74                          | Listeria_monocytogenes_1639_v36 | 0.931  |
| Listeria_monocytogenes_1639_v73                          | Listeria_monocytogenes_1639_v36 | 0.9419 |
| Listeria_monocytogenes_1639_v72                          | Listeria_monocytogenes_1639_v36 | 0.9088 |
| Listeria_monocytogenes_1639_v71                          | Listeria_monocytogenes_1639_v36 | 0.9293 |
| Listeria_monocytogenes_1639_v70                          | Listeria_monocytogenes_1639_v36 | 0.9392 |
| Listeria_monocytogenes_1639_v6                           | Listeria_monocytogenes_1639_v36 | 0.9394 |
| Listeria_monocytogenes_1639_v69                          | Listeria_monocytogenes_1639_v36 | 0.9094 |
| Listeria_monocytogenes_1639_v68                          | Listeria_monocytogenes_1639_v36 | 0.9333 |
| Listeria_monocytogenes_1639_v67                          | Listeria_monocytogenes_1639_v36 | 0.9263 |
| Listeria_monocytogenes_1639_v66                          | Listeria_monocytogenes_1639_v36 | 0.9455 |
| Listeria_monocytogenes_1639_v65                          | Listeria_monocytogenes_1639_v36 | 0.9458 |
| Listeria_monocytogenes_1639_v64                          | Listeria_monocytogenes_1639_v36 | 0.9452 |
| Listeria_monocytogenes_1639_v63                          | Listeria_monocytogenes_1639_v36 | 0.9307 |
| Listeria_monocytogenes_1639_v62                          | Listeria_monocytogenes_1639_v36 | 0.9475 |
| Listeria_monocytogenes_1639_v61                          | Listeria_monocytogenes_1639_v36 | 0.9373 |
| Listeria_monocytogenes_1639_v60                          | Listeria_monocytogenes_1639_v36 | 0.9325 |
| Listeria_monocytogenes_1639_v5                           | Listeria_monocytogenes_1639_v36 | 0.9097 |
| Listeria_monocytogenes_1639_v59                          | Listeria_monocytogenes_1639_v36 | 0.9173 |
| Listeria_monocytogenes_1639_v58                          | Listeria_monocytogenes_1639_v36 | 0.9114 |
| Listeria_monocytogenes_1639_v57                          | Listeria_monocytogenes_1639_v36 | 0.9058 |
| Listeria_monocytogenes_1639_v56                          | Listeria_monocytogenes_1639_v36 | 0.9129 |
| Listeria_monocytogenes_1639_v55                          | Listeria_monocytogenes_1639_v36 | 0.9102 |
| Listeria_monocytogenes_1639_v54                          | Listeria_monocytogenes_1639_v36 | 0.9019 |
| Listeria_monocytogenes_1639_v53                          | Listeria_monocytogenes_1639_v36 | 0.9277 |
| Listeria_monocytogenes_1639_v52                          | Listeria_monocytogenes_1639_v36 | 0.9139 |
| Listeria_monocytogenes_1639_v51                          | Listeria_monocytogenes_1639_v36 | 0.9142 |
| Listeria_monocytogenes_1639_v50                          | Listeria_monocytogenes_1639_v36 | 0.9328 |
| Listeria_monocytogenes_1639_v4                           | Listeria_monocytogenes_1639_v36 | 0.9223 |
| Listeria_monocytogenes_1639_v49                          | Listeria_monocytogenes_1639_v36 | 0.9113 |
| Listeria_monocytogenes_1639_v48                          | Listeria_monocytogenes_1639_v36 | 0.9423 |
| Listeria_monocytogenes_1639_v47                          | Listeria_monocytogenes_1639_v36 | 0.9354 |
| Listeria_monocytogenes_1639_v46                          | Listeria_monocytogenes_1639_v36 | 0.9326 |
| Listeria_monocytogenes_1639_v45                          | Listeria_monocytogenes_1639_v36 | 0.9331 |
| Listeria_monocytogenes_1639_v44                          | Listeria_monocytogenes_1639_v36 | 0.9343 |
| Listeria_monocytogenes_1639_v43                          | Listeria_monocytogenes_1639_v36 | 0.9343 |
| Listeria_monocytogenes_1639_v42                          | Listeria_monocytogenes_1639_v36 | 0.9277 |
| Listeria_monocytogenes_1639_v41                          | Listeria_monocytogenes_1639_v36 | 0.9361 |
| Listeria_monocytogenes_1639_v40                          | Listeria_monocytogenes_1639_v36 | 0.9515 |
| Listeria_monocytogenes_1639_v3                           | Listeria_monocytogenes_1639_v36 | 0.923  |
| Listeria_monocytogenes_1639_v39                          | Listeria_monocytogenes_1639_v36 | 0.923  |
| Listeria_monocytogenes_1639_v38                          | Listeria_monocytogenes_1639_v36 | 0.9531 |
| Listeria_monocytogenes_1639_v37                          | Listeria_monocytogenes_1639_v36 | 0.9366 |
| Listeria_monocytogenes_1639_v36                          | Listeria_monocytogenes_1639_v36 | 0.0709 |
| Listeria_welshimeri_1643                                 | Listeria_monocytogenes_1639_v37 | 0.8596 |
| Listeria_welshimeri_serovar_6b_str_SLCC5334_386043       | Listeria_monocytogenes_1639_v37 | 0.8589 |
| Listeria_seeligeri_serovar_1_2b_str_SLCC3954_683837      | Listeria_monocytogenes_1639_v37 | 0.8676 |
| Listeria_seeligeri_FSL_S4-171_702452                     | Listeria_monocytogenes_1639_v37 | 0.8014 |
| Listeria_seeligeri_FSL_N1-067_702453                     | Listeria_monocytogenes_1639_v37 | 0.8162 |
| Listeria_seeligeri_1640_v1                               | Listeria_monocytogenes_1639_v37 | 0.8662 |
| Listeria_seeligeri_1640                                  | Listeria_monocytogenes_1639_v37 | 0.8787 |
| Listeria_monocytogenes_WSLC1042_1457188                  | Listeria_monocytogenes_1639_v37 | 0.9155 |
| Listeria_monocytogenes_WSLC1001_1457187                  | Listeria_monocytogenes_1639_v37 | 0.9455 |
| Listeria_monocytogenes_SLCC7179_879090                   | Listeria_monocytogenes_1639_v37 | 0.9383 |
| Listeria_monocytogenes_SLCC5850_882096                   | Listeria_monocytogenes_1639_v37 | 0.9467 |
| Listeria_monocytogenes_SLCC2755_932919                   | Listeria_monocytogenes_1639_v37 | 0.9302 |
| Listeria_monocytogenes_SLCC2540_879089                   | Listeria_monocytogenes_1639_v37 | 0.931  |
| Listeria_monocytogenes_SLCC2479_882020                   | Listeria_monocytogenes_1639_v37 | 0.9577 |
| Listeria_monocytogenes_SLCC2378_879088                   | Listeria_monocytogenes_1639_v37 | 0.9169 |
| Listeria_monocytogenes_SLCC2376_882097                   | Listeria_monocytogenes_1639_v37 | 0.923  |
| Listeria_monocytogenes_SLCC2372_932920                   | Listeria_monocytogenes_1639_v37 | 0.9499 |
| Listeria_monocytogenes_serotype_4b_str_LL195_1230340     | Listeria_monocytogenes_1639_v37 | 0.9227 |
| Listeria_monocytogenes_serotype_4b_str_LIS0087_1134669   | Listeria_monocytogenes_1639_v37 | 0.9241 |
| Listeria_monocytogenes_serotype_4b_str_F2365_265669      | Listeria_monocytogenes_1639_v37 | 0.9227 |
| Listeria_monocytogenes_serotype_4b_str_CLIP_80459_568819 | Listeria_monocytogenes_1639_v37 | 0.9249 |



|                                                          |                                 |        |
|----------------------------------------------------------|---------------------------------|--------|
| Listeria_monocytogenes_serotype_4b_str_81-0861_1196161   | Listeria_monocytogenes_1639_v37 | 0.9082 |
| Listeria_monocytogenes_serotype_4b_str_81-0592_1196160   | Listeria_monocytogenes_1639_v37 | 0.9093 |
| Listeria_monocytogenes_serotype_4b_str_81-0558_1196159   | Listeria_monocytogenes_1639_v37 | 0.9099 |
| Listeria_monocytogenes_serotype_4b_str_10-0809_1196162   | Listeria_monocytogenes_1639_v37 | 0.9093 |
| Listeria_monocytogenes_serotype_4b_str_02-6680_1196175   | Listeria_monocytogenes_1639_v37 | 0.9228 |
| Listeria_monocytogenes_serotype_4b_str_02-6679_1196174   | Listeria_monocytogenes_1639_v37 | 0.9228 |
| Listeria_monocytogenes_serotype_4b_str_02-1792_1196173   | Listeria_monocytogenes_1639_v37 | 0.91   |
| Listeria_monocytogenes_serotype_4b_str_02-1289_1196172   | Listeria_monocytogenes_1639_v37 | 0.91   |
| Listeria_monocytogenes_serotype_4b_str_02-1103_1196171   | Listeria_monocytogenes_1639_v37 | 0.91   |
| Listeria_monocytogenes_serotype_3c_str_10-5027_1196195   | Listeria_monocytogenes_1639_v37 | 0.9569 |
| Listeria_monocytogenes_serotype_1_2c_str_10-5026_1196194 | Listeria_monocytogenes_1639_v37 | 0.958  |
| Listeria_monocytogenes_serotype_1_2c_str_10-5025_1196193 | Listeria_monocytogenes_1639_v37 | 0.958  |
| Listeria_monocytogenes_serotype_1_2b_str_10-0811_1196164 | Listeria_monocytogenes_1639_v37 | 0.9259 |
| Listeria_monocytogenes_serotype_1_2b_str_10-0810_1196163 | Listeria_monocytogenes_1639_v37 | 0.9259 |
| Listeria_monocytogenes_serotype_1_2a_str_99-6370_1196179 | Listeria_monocytogenes_1639_v37 | 0.9277 |
| Listeria_monocytogenes_serotype_1_2a_str_98-2035_1196178 | Listeria_monocytogenes_1639_v37 | 0.9277 |
| Listeria_monocytogenes_serotype_1_2a_str_95-0093_1196177 | Listeria_monocytogenes_1639_v37 | 0.932  |
| Listeria_monocytogenes_serotype_1_2a_str_88-0478_1196176 | Listeria_monocytogenes_1639_v37 | 0.9334 |
| Listeria_monocytogenes_serotype_1_2a_str_10-5024_1196192 | Listeria_monocytogenes_1639_v37 | 0.9327 |
| Listeria_monocytogenes_serotype_1_2a_str_10-4758_1196168 | Listeria_monocytogenes_1639_v37 | 0.9472 |
| Listeria_monocytogenes_serotype_1_2a_str_10-4754_1196167 | Listeria_monocytogenes_1639_v37 | 0.9472 |
| Listeria_monocytogenes_serotype_1_2a_str_10-1321_1196191 | Listeria_monocytogenes_1639_v37 | 0.9327 |
| Listeria_monocytogenes_serotype_1_2a_str_10-1047_1196190 | Listeria_monocytogenes_1639_v37 | 0.9323 |
| Listeria_monocytogenes_serotype_1_2a_str_10-1046_1196189 | Listeria_monocytogenes_1639_v37 | 0.9323 |
| Listeria_monocytogenes_serotype_1_2a_str_10-0934_1196170 | Listeria_monocytogenes_1639_v37 | 0.9476 |
| Listeria_monocytogenes_serotype_1_2a_str_10-0933_1196169 | Listeria_monocytogenes_1639_v37 | 0.9476 |
| Listeria_monocytogenes_serotype_1_2a_str_10-0815_1196188 | Listeria_monocytogenes_1639_v37 | 0.9286 |
| Listeria_monocytogenes_serotype_1_2a_str_10-0814_1196187 | Listeria_monocytogenes_1639_v37 | 0.9323 |
| Listeria_monocytogenes_serotype_1_2a_str_10-0813_1196166 | Listeria_monocytogenes_1639_v37 | 0.9401 |
| Listeria_monocytogenes_serotype_1_2a_str_10-0812_1196165 | Listeria_monocytogenes_1639_v37 | 0.9401 |
| Listeria_monocytogenes_serotype_1_2a_str_08-7669_1196186 | Listeria_monocytogenes_1639_v37 | 0.9316 |
| Listeria_monocytogenes_serotype_1_2a_str_08-7374_1196185 | Listeria_monocytogenes_1639_v37 | 0.9327 |
| Listeria_monocytogenes_serotype_1_2a_str_08-6997_1196184 | Listeria_monocytogenes_1639_v37 | 0.9286 |
| Listeria_monocytogenes_serotype_1_2a_str_08-6569_1196183 | Listeria_monocytogenes_1639_v37 | 0.9286 |
| Listeria_monocytogenes_serotype_1_2a_str_08-6056_1196182 | Listeria_monocytogenes_1639_v37 | 0.9286 |
| Listeria_monocytogenes_serotype_1_2a_str_04-5457_1196181 | Listeria_monocytogenes_1639_v37 | 0.9327 |
| Listeria_monocytogenes_serotype_1_2a_str_02-5993_1196180 | Listeria_monocytogenes_1639_v37 | 0.9323 |
| Listeria_monocytogenes_R479a_1437838                     | Listeria_monocytogenes_1639_v37 | 0.9306 |
| Listeria_monocytogenes_N53-1_1234142                     | Listeria_monocytogenes_1639_v37 | 0.8951 |
| Listeria_monocytogenes_M7_1030009                        | Listeria_monocytogenes_1639_v37 | 0.8966 |
| Listeria_monocytogenes_LO28_393132                       | Listeria_monocytogenes_1639_v37 | 0.9563 |
| Listeria_monocytogenes_L99_563174                        | Listeria_monocytogenes_1639_v37 | 0.8973 |
| Listeria_monocytogenes_L312_882094                       | Listeria_monocytogenes_1639_v37 | 0.9249 |
| Listeria_monocytogenes_J1816_930781                      | Listeria_monocytogenes_1639_v37 | 0.9089 |
| Listeria_monocytogenes_J1-220_930782                     | Listeria_monocytogenes_1639_v37 | 0.9078 |
| Listeria_monocytogenes_J0161_393130                      | Listeria_monocytogenes_1639_v37 | 0.9268 |
| Listeria_monocytogenes_HCC23_552536                      | Listeria_monocytogenes_1639_v37 | 0.8966 |
| Listeria_monocytogenes_FSL_R2-561_393126                 | Listeria_monocytogenes_1639_v37 | 0.957  |
| Listeria_monocytogenes_FSL_J1-208_393119                 | Listeria_monocytogenes_1639_v37 | 0.8901 |
| Listeria_monocytogenes_FSL_J1-175_393118                 | Listeria_monocytogenes_1639_v37 | 0.9315 |
| Listeria_monocytogenes_Finland_1998_393127               | Listeria_monocytogenes_1639_v37 | 0.9405 |
| Listeria_monocytogenes_EGD-e_169963_v1                   | Listeria_monocytogenes_1639_v37 | 0.9543 |
| Listeria_monocytogenes_EGD-e_169963                      | Listeria_monocytogenes_1639_v37 | 0.9543 |
| Listeria_monocytogenes_EGD_1334565                       | Listeria_monocytogenes_1639_v37 | 0.9475 |
| Listeria_monocytogenes_CFSAN002349_1299895               | Listeria_monocytogenes_1639_v37 | 0.9259 |
| Listeria_monocytogenes_ATCC_19117_882095_v1              | Listeria_monocytogenes_1639_v37 | 0.917  |
| Listeria_monocytogenes_ATCC_19117_882095                 | Listeria_monocytogenes_1639_v37 | 0.917  |
| Listeria_monocytogenes_6179_1288295                      | Listeria_monocytogenes_1639_v37 | 0.9242 |
| Listeria_monocytogenes_1639_v9                           | Listeria_monocytogenes_1639_v37 | 0.9306 |
| Listeria_monocytogenes_1639_v99                          | Listeria_monocytogenes_1639_v37 | 0.9107 |
| Listeria_monocytogenes_1639_v98                          | Listeria_monocytogenes_1639_v37 | 0.9319 |
| Listeria_monocytogenes_1639_v97                          | Listeria_monocytogenes_1639_v37 | 0.9137 |
| Listeria_monocytogenes_1639_v96                          | Listeria_monocytogenes_1639_v37 | 0.9093 |
| Listeria_monocytogenes_1639_v95                          | Listeria_monocytogenes_1639_v37 | 0.9094 |
| Listeria_monocytogenes_1639_v94                          | Listeria_monocytogenes_1639_v37 | 0.9093 |
| Listeria_monocytogenes_1639_v93                          | Listeria_monocytogenes_1639_v37 | 0.9345 |
| Listeria_monocytogenes_1639_v92                          | Listeria_monocytogenes_1639_v37 | 0.9111 |
| Listeria_monocytogenes_1639_v91                          | Listeria_monocytogenes_1639_v37 | 0.9139 |
| Listeria_monocytogenes_1639_v90                          | Listeria_monocytogenes_1639_v37 | 0.9319 |
| Listeria_monocytogenes_1639_v8                           | Listeria_monocytogenes_1639_v37 | 0.9335 |
| Listeria_monocytogenes_1639_v89                          | Listeria_monocytogenes_1639_v37 | 0.9201 |
| Listeria_monocytogenes_1639_v88                          | Listeria_monocytogenes_1639_v37 | 0.9439 |
| Listeria_monocytogenes_1639_v87                          | Listeria_monocytogenes_1639_v37 | 0.9367 |
| Listeria_monocytogenes_1639_v86                          | Listeria_monocytogenes_1639_v37 | 0.936  |
| Listeria_monocytogenes_1639_v85                          | Listeria_monocytogenes_1639_v37 | 0.9076 |
| Listeria_monocytogenes_1639_v84                          | Listeria_monocytogenes_1639_v37 | 0.9408 |
| Listeria_monocytogenes_1639_v83                          | Listeria_monocytogenes_1639_v37 | 0.908  |
| Listeria_monocytogenes_1639_v82                          | Listeria_monocytogenes_1639_v37 | 0.9077 |
| Listeria_monocytogenes_1639_v81                          | Listeria_monocytogenes_1639_v37 | 0.9372 |
| Listeria_monocytogenes_1639_v80                          | Listeria_monocytogenes_1639_v37 | 0.9286 |
| Listeria_monocytogenes_1639_v7                           | Listeria_monocytogenes_1639_v37 | 0.9335 |
| Listeria_monocytogenes_1639_v79                          | Listeria_monocytogenes_1639_v37 | 0.9329 |
| Listeria_monocytogenes_1639_v78                          | Listeria_monocytogenes_1639_v37 | 0.9362 |
| Listeria_monocytogenes_1639_v77                          | Listeria_monocytogenes_1639_v37 | 0.9307 |
| Listeria_monocytogenes_1639_v76                          | Listeria_monocytogenes_1639_v37 | 0.9344 |
| Listeria_monocytogenes_1639_v75                          | Listeria_monocytogenes_1639_v37 | 0.8973 |
| Listeria_monocytogenes_1639_v74                          | Listeria_monocytogenes_1639_v37 | 0.9287 |
| Listeria_monocytogenes_1639_v73                          | Listeria_monocytogenes_1639_v37 | 0.9521 |
| Listeria_monocytogenes_1639_v72                          | Listeria_monocytogenes_1639_v37 | 0.9075 |
| Listeria_monocytogenes_1639_v71                          | Listeria_monocytogenes_1639_v37 | 0.9234 |
| Listeria_monocytogenes_1639_v70                          | Listeria_monocytogenes_1639_v37 | 0.9549 |

|                                                          |                                 |        |
|----------------------------------------------------------|---------------------------------|--------|
| Listeria_monocytogenes_1639_v6                           | Listeria_monocytogenes_1639_v37 | 0.9328 |
| Listeria_monocytogenes_1639_v69                          | Listeria_monocytogenes_1639_v37 | 0.9096 |
| Listeria_monocytogenes_1639_v68                          | Listeria_monocytogenes_1639_v37 | 0.9298 |
| Listeria_monocytogenes_1639_v67                          | Listeria_monocytogenes_1639_v37 | 0.9273 |
| Listeria_monocytogenes_1639_v66                          | Listeria_monocytogenes_1639_v37 | 0.9458 |
| Listeria_monocytogenes_1639_v65                          | Listeria_monocytogenes_1639_v37 | 0.9354 |
| Listeria_monocytogenes_1639_v64                          | Listeria_monocytogenes_1639_v37 | 0.9392 |
| Listeria_monocytogenes_1639_v63                          | Listeria_monocytogenes_1639_v37 | 0.9247 |
| Listeria_monocytogenes_1639_v62                          | Listeria_monocytogenes_1639_v37 | 0.9331 |
| Listeria_monocytogenes_1639_v61                          | Listeria_monocytogenes_1639_v37 | 0.9347 |
| Listeria_monocytogenes_1639_v60                          | Listeria_monocytogenes_1639_v37 | 0.9287 |
| Listeria_monocytogenes_1639_v5                           | Listeria_monocytogenes_1639_v37 | 0.9226 |
| Listeria_monocytogenes_1639_v59                          | Listeria_monocytogenes_1639_v37 | 0.9139 |
| Listeria_monocytogenes_1639_v58                          | Listeria_monocytogenes_1639_v37 | 0.9146 |
| Listeria_monocytogenes_1639_v57                          | Listeria_monocytogenes_1639_v37 | 0.9313 |
| Listeria_monocytogenes_1639_v56                          | Listeria_monocytogenes_1639_v37 | 0.9095 |
| Listeria_monocytogenes_1639_v55                          | Listeria_monocytogenes_1639_v37 | 0.9046 |
| Listeria_monocytogenes_1639_v54                          | Listeria_monocytogenes_1639_v37 | 0.9048 |
| Listeria_monocytogenes_1639_v53                          | Listeria_monocytogenes_1639_v37 | 0.9294 |
| Listeria_monocytogenes_1639_v52                          | Listeria_monocytogenes_1639_v37 | 0.9123 |
| Listeria_monocytogenes_1639_v51                          | Listeria_monocytogenes_1639_v37 | 0.9044 |
| Listeria_monocytogenes_1639_v50                          | Listeria_monocytogenes_1639_v37 | 0.9312 |
| Listeria_monocytogenes_1639_v4                           | Listeria_monocytogenes_1639_v37 | 0.9351 |
| Listeria_monocytogenes_1639_v49                          | Listeria_monocytogenes_1639_v37 | 0.9119 |
| Listeria_monocytogenes_1639_v48                          | Listeria_monocytogenes_1639_v37 | 0.9528 |
| Listeria_monocytogenes_1639_v47                          | Listeria_monocytogenes_1639_v37 | 0.9323 |
| Listeria_monocytogenes_1639_v46                          | Listeria_monocytogenes_1639_v37 | 0.9291 |
| Listeria_monocytogenes_1639_v45                          | Listeria_monocytogenes_1639_v37 | 0.9229 |
| Listeria_monocytogenes_1639_v44                          | Listeria_monocytogenes_1639_v37 | 0.9327 |
| Listeria_monocytogenes_1639_v43                          | Listeria_monocytogenes_1639_v37 | 0.9327 |
| Listeria_monocytogenes_1639_v42                          | Listeria_monocytogenes_1639_v37 | 0.9192 |
| Listeria_monocytogenes_1639_v41                          | Listeria_monocytogenes_1639_v37 | 0.9119 |
| Listeria_monocytogenes_1639_v40                          | Listeria_monocytogenes_1639_v37 | 0.957  |
| Listeria_monocytogenes_1639_v3                           | Listeria_monocytogenes_1639_v37 | 0.9355 |
| Listeria_monocytogenes_1639_v39                          | Listeria_monocytogenes_1639_v37 | 0.9243 |
| Listeria_monocytogenes_1639_v38                          | Listeria_monocytogenes_1639_v37 | 0.9611 |
| Listeria_monocytogenes_1639_v37                          | Listeria_monocytogenes_1639_v37 | 0.0675 |
| Listeria_welshimeri_1643                                 | Listeria_monocytogenes_1639_v38 | 0.8705 |
| Listeria_welshimeri_serovar_6b_str_SLCC5334_386043       | Listeria_monocytogenes_1639_v38 | 0.8702 |
| Listeria_seeligeri_serovar_1_2b_str_SLCC3954_683837      | Listeria_monocytogenes_1639_v38 | 0.871  |
| Listeria_seeligeri_FSL_S4-171_702452                     | Listeria_monocytogenes_1639_v38 | 0.8053 |
| Listeria_seeligeri_FSL_N1-067_702453                     | Listeria_monocytogenes_1639_v38 | 0.8219 |
| Listeria_seeligeri_1640_v1                               | Listeria_monocytogenes_1639_v38 | 0.8718 |
| Listeria_seeligeri_1640                                  | Listeria_monocytogenes_1639_v38 | 0.8639 |
| Listeria_monocytogenes_WSLC1042_1457188                  | Listeria_monocytogenes_1639_v38 | 0.9304 |
| Listeria_monocytogenes_WSLC1001_1457187                  | Listeria_monocytogenes_1639_v38 | 0.9519 |
| Listeria_monocytogenes_SLCC7179_879090                   | Listeria_monocytogenes_1639_v38 | 0.9421 |
| Listeria_monocytogenes_SLCC5850_882096                   | Listeria_monocytogenes_1639_v38 | 0.9506 |
| Listeria_monocytogenes_SLCC2755_932919                   | Listeria_monocytogenes_1639_v38 | 0.9276 |
| Listeria_monocytogenes_SLCC2540_879089                   | Listeria_monocytogenes_1639_v38 | 0.9407 |
| Listeria_monocytogenes_SLCC2479_882020                   | Listeria_monocytogenes_1639_v38 | 0.9689 |
| Listeria_monocytogenes_SLCC2378_879088                   | Listeria_monocytogenes_1639_v38 | 0.9311 |
| Listeria_monocytogenes_SLCC2376_882097                   | Listeria_monocytogenes_1639_v38 | 0.9279 |
| Listeria_monocytogenes_SLCC2372_932920                   | Listeria_monocytogenes_1639_v38 | 0.9618 |
| Listeria_monocytogenes_serotype_4b_str_LL195_1230340     | Listeria_monocytogenes_1639_v38 | 0.9268 |
| Listeria_monocytogenes_serotype_4b_str_LIS0087_1134669   | Listeria_monocytogenes_1639_v38 | 0.9324 |
| Listeria_monocytogenes_serotype_4b_str_F2365_265669      | Listeria_monocytogenes_1639_v38 | 0.9268 |
| Listeria_monocytogenes_serotype_4b_str_CLIP_80459_568819 | Listeria_monocytogenes_1639_v38 | 0.9294 |
| Listeria_monocytogenes_serotype_4b_str_81-0861_1196161   | Listeria_monocytogenes_1639_v38 | 0.9229 |
| Listeria_monocytogenes_serotype_4b_str_81-0592_1196160   | Listeria_monocytogenes_1639_v38 | 0.924  |
| Listeria_monocytogenes_serotype_4b_str_81-0558_1196159   | Listeria_monocytogenes_1639_v38 | 0.9243 |
| Listeria_monocytogenes_serotype_4b_str_10-0809_1196162   | Listeria_monocytogenes_1639_v38 | 0.924  |
| Listeria_monocytogenes_serotype_4b_str_02-6680_1196175   | Listeria_monocytogenes_1639_v38 | 0.9269 |
| Listeria_monocytogenes_serotype_4b_str_02-6679_1196174   | Listeria_monocytogenes_1639_v38 | 0.9269 |
| Listeria_monocytogenes_serotype_4b_str_02-1792_1196173   | Listeria_monocytogenes_1639_v38 | 0.9232 |
| Listeria_monocytogenes_serotype_4b_str_02-1289_1196172   | Listeria_monocytogenes_1639_v38 | 0.9232 |
| Listeria_monocytogenes_serotype_4b_str_02-1103_1196171   | Listeria_monocytogenes_1639_v38 | 0.9232 |
| Listeria_monocytogenes_serotype_3c_str_10-5027_1196195   | Listeria_monocytogenes_1639_v38 | 0.9656 |
| Listeria_monocytogenes_serotype_1_2c_str_10-5026_1196194 | Listeria_monocytogenes_1639_v38 | 0.9663 |
| Listeria_monocytogenes_serotype_1_2c_str_10-5025_1196193 | Listeria_monocytogenes_1639_v38 | 0.9663 |
| Listeria_monocytogenes_serotype_1_2b_str_10-0811_1196164 | Listeria_monocytogenes_1639_v38 | 0.9303 |
| Listeria_monocytogenes_serotype_1_2b_str_10-0810_1196163 | Listeria_monocytogenes_1639_v38 | 0.9303 |
| Listeria_monocytogenes_serotype_1_2a_str_99-6370_1196179 | Listeria_monocytogenes_1639_v38 | 0.9327 |
| Listeria_monocytogenes_serotype_1_2a_str_98-2035_1196178 | Listeria_monocytogenes_1639_v38 | 0.9327 |
| Listeria_monocytogenes_serotype_1_2a_str_95-0093_1196177 | Listeria_monocytogenes_1639_v38 | 0.9371 |
| Listeria_monocytogenes_serotype_1_2a_str_88-0478_1196176 | Listeria_monocytogenes_1639_v38 | 0.9382 |
| Listeria_monocytogenes_serotype_1_2a_str_10-5024_1196192 | Listeria_monocytogenes_1639_v38 | 0.9378 |
| Listeria_monocytogenes_serotype_1_2a_str_10-4758_1196168 | Listeria_monocytogenes_1639_v38 | 0.9536 |
| Listeria_monocytogenes_serotype_1_2a_str_10-4754_1196167 | Listeria_monocytogenes_1639_v38 | 0.954  |
| Listeria_monocytogenes_serotype_1_2a_str_10-1321_1196191 | Listeria_monocytogenes_1639_v38 | 0.9378 |
| Listeria_monocytogenes_serotype_1_2a_str_10-1047_1196190 | Listeria_monocytogenes_1639_v38 | 0.9389 |
| Listeria_monocytogenes_serotype_1_2a_str_10-1046_1196189 | Listeria_monocytogenes_1639_v38 | 0.9389 |
| Listeria_monocytogenes_serotype_1_2a_str_10-0934_1196170 | Listeria_monocytogenes_1639_v38 | 0.9527 |
| Listeria_monocytogenes_serotype_1_2a_str_10-0933_1196169 | Listeria_monocytogenes_1639_v38 | 0.9527 |
| Listeria_monocytogenes_serotype_1_2a_str_10-0815_1196188 | Listeria_monocytogenes_1639_v38 | 0.9337 |
| Listeria_monocytogenes_serotype_1_2a_str_10-0814_1196187 | Listeria_monocytogenes_1639_v38 | 0.9378 |
| Listeria_monocytogenes_serotype_1_2a_str_10-0813_1196166 | Listeria_monocytogenes_1639_v38 | 0.9454 |
| Listeria_monocytogenes_serotype_1_2a_str_10-0812_1196165 | Listeria_monocytogenes_1639_v38 | 0.9454 |
| Listeria_monocytogenes_serotype_1_2a_str_08-7669_1196186 | Listeria_monocytogenes_1639_v38 | 0.9353 |
| Listeria_monocytogenes_serotype_1_2a_str_08-7374_1196185 | Listeria_monocytogenes_1639_v38 | 0.9378 |
| Listeria_monocytogenes_serotype_1_2a_str_08-6997_1196184 | Listeria_monocytogenes_1639_v38 | 0.9337 |

|                                                          |                                 |        |
|----------------------------------------------------------|---------------------------------|--------|
| Listeria_monocytogenes_serotype_1_2a_str_08-6569_1196183 | Listeria_monocytogenes_1639_v38 | 0.9337 |
| Listeria_monocytogenes_serotype_1_2a_str_08-6056_1196182 | Listeria_monocytogenes_1639_v38 | 0.9337 |
| Listeria_monocytogenes_serotype_1_2a_str_04-5457_1196181 | Listeria_monocytogenes_1639_v38 | 0.9378 |
| Listeria_monocytogenes_serotype_1_2a_str_02-5993_1196180 | Listeria_monocytogenes_1639_v38 | 0.9378 |
| Listeria_monocytogenes_R479a_1437838                     | Listeria_monocytogenes_1639_v38 | 0.9375 |
| Listeria_monocytogenes_N53-1_1234142                     | Listeria_monocytogenes_1639_v38 | 0.8989 |
| Listeria_monocytogenes_M7_1030009                        | Listeria_monocytogenes_1639_v38 | 0.9023 |
| Listeria_monocytogenes_LO28_393132                       | Listeria_monocytogenes_1639_v38 | 0.9675 |
| Listeria_monocytogenes_L99_563174                        | Listeria_monocytogenes_1639_v38 | 0.9026 |
| Listeria_monocytogenes_L312_882094                       | Listeria_monocytogenes_1639_v38 | 0.9294 |
| Listeria_monocytogenes_J1816_930781                      | Listeria_monocytogenes_1639_v38 | 0.9124 |
| Listeria_monocytogenes_J1-220_930782                     | Listeria_monocytogenes_1639_v38 | 0.9201 |
| Listeria_monocytogenes_J0161_393130                      | Listeria_monocytogenes_1639_v38 | 0.932  |
| Listeria_monocytogenes_HCC23_552536                      | Listeria_monocytogenes_1639_v38 | 0.9019 |
| Listeria_monocytogenes_FSL_R2-561_393126                 | Listeria_monocytogenes_1639_v38 | 0.9645 |
| Listeria_monocytogenes_FSL_J1-208_393119                 | Listeria_monocytogenes_1639_v38 | 0.8943 |
| Listeria_monocytogenes_FSL_J1-175_393118                 | Listeria_monocytogenes_1639_v38 | 0.939  |
| Listeria_monocytogenes_Finland_1998_393127               | Listeria_monocytogenes_1639_v38 | 0.9462 |
| Listeria_monocytogenes_EGD-e_169963_v1                   | Listeria_monocytogenes_1639_v38 | 0.9608 |
| Listeria_monocytogenes_EGD-e_169963                      | Listeria_monocytogenes_1639_v38 | 0.9608 |
| Listeria_monocytogenes_EGD_1334565                       | Listeria_monocytogenes_1639_v38 | 0.9513 |
| Listeria_monocytogenes_CFSAN002349_1299895               | Listeria_monocytogenes_1639_v38 | 0.9304 |
| Listeria_monocytogenes_ATCC_19117_882095_v1              | Listeria_monocytogenes_1639_v38 | 0.9312 |
| Listeria_monocytogenes_ATCC_19117_882095                 | Listeria_monocytogenes_1639_v38 | 0.9309 |
| Listeria_monocytogenes_6179_1288295                      | Listeria_monocytogenes_1639_v38 | 0.9278 |
| Listeria_monocytogenes_1639_v9                           | Listeria_monocytogenes_1639_v38 | 0.9142 |
| Listeria_monocytogenes_1639_v99                          | Listeria_monocytogenes_1639_v38 | 0.9132 |
| Listeria_monocytogenes_1639_v98                          | Listeria_monocytogenes_1639_v38 | 0.9349 |
| Listeria_monocytogenes_1639_v97                          | Listeria_monocytogenes_1639_v38 | 0.9177 |
| Listeria_monocytogenes_1639_v96                          | Listeria_monocytogenes_1639_v38 | 0.9129 |
| Listeria_monocytogenes_1639_v95                          | Listeria_monocytogenes_1639_v38 | 0.9129 |
| Listeria_monocytogenes_1639_v94                          | Listeria_monocytogenes_1639_v38 | 0.9133 |
| Listeria_monocytogenes_1639_v93                          | Listeria_monocytogenes_1639_v38 | 0.9385 |
| Listeria_monocytogenes_1639_v92                          | Listeria_monocytogenes_1639_v38 | 0.9136 |
| Listeria_monocytogenes_1639_v91                          | Listeria_monocytogenes_1639_v38 | 0.9175 |
| Listeria_monocytogenes_1639_v90                          | Listeria_monocytogenes_1639_v38 | 0.9349 |
| Listeria_monocytogenes_1639_v8                           | Listeria_monocytogenes_1639_v38 | 0.9328 |
| Listeria_monocytogenes_1639_v89                          | Listeria_monocytogenes_1639_v38 | 0.9222 |
| Listeria_monocytogenes_1639_v88                          | Listeria_monocytogenes_1639_v38 | 0.9492 |
| Listeria_monocytogenes_1639_v87                          | Listeria_monocytogenes_1639_v38 | 0.9431 |
| Listeria_monocytogenes_1639_v86                          | Listeria_monocytogenes_1639_v38 | 0.9427 |
| Listeria_monocytogenes_1639_v85                          | Listeria_monocytogenes_1639_v38 | 0.9215 |
| Listeria_monocytogenes_1639_v84                          | Listeria_monocytogenes_1639_v38 | 0.9475 |
| Listeria_monocytogenes_1639_v83                          | Listeria_monocytogenes_1639_v38 | 0.9227 |
| Listeria_monocytogenes_1639_v82                          | Listeria_monocytogenes_1639_v38 | 0.9224 |
| Listeria_monocytogenes_1639_v81                          | Listeria_monocytogenes_1639_v38 | 0.9436 |
| Listeria_monocytogenes_1639_v80                          | Listeria_monocytogenes_1639_v38 | 0.9338 |
| Listeria_monocytogenes_1639_v7                           | Listeria_monocytogenes_1639_v38 | 0.9328 |
| Listeria_monocytogenes_1639_v79                          | Listeria_monocytogenes_1639_v38 | 0.9433 |
| Listeria_monocytogenes_1639_v78                          | Listeria_monocytogenes_1639_v38 | 0.9414 |
| Listeria_monocytogenes_1639_v77                          | Listeria_monocytogenes_1639_v38 | 0.9367 |
| Listeria_monocytogenes_1639_v76                          | Listeria_monocytogenes_1639_v38 | 0.9389 |
| Listeria_monocytogenes_1639_v75                          | Listeria_monocytogenes_1639_v38 | 0.9026 |
| Listeria_monocytogenes_1639_v74                          | Listeria_monocytogenes_1639_v38 | 0.9305 |
| Listeria_monocytogenes_1639_v73                          | Listeria_monocytogenes_1639_v38 | 0.9599 |
| Listeria_monocytogenes_1639_v72                          | Listeria_monocytogenes_1639_v38 | 0.9201 |
| Listeria_monocytogenes_1639_v71                          | Listeria_monocytogenes_1639_v38 | 0.9292 |
| Listeria_monocytogenes_1639_v70                          | Listeria_monocytogenes_1639_v38 | 0.9646 |
| Listeria_monocytogenes_1639_v6                           | Listeria_monocytogenes_1639_v38 | 0.9324 |
| Listeria_monocytogenes_1639_v69                          | Listeria_monocytogenes_1639_v38 | 0.924  |
| Listeria_monocytogenes_1639_v68                          | Listeria_monocytogenes_1639_v38 | 0.9443 |
| Listeria_monocytogenes_1639_v67                          | Listeria_monocytogenes_1639_v38 | 0.9339 |
| Listeria_monocytogenes_1639_v66                          | Listeria_monocytogenes_1639_v38 | 0.9515 |
| Listeria_monocytogenes_1639_v65                          | Listeria_monocytogenes_1639_v38 | 0.9388 |
| Listeria_monocytogenes_1639_v64                          | Listeria_monocytogenes_1639_v38 | 0.9474 |
| Listeria_monocytogenes_1639_v63                          | Listeria_monocytogenes_1639_v38 | 0.9321 |
| Listeria_monocytogenes_1639_v62                          | Listeria_monocytogenes_1639_v38 | 0.9383 |
| Listeria_monocytogenes_1639_v61                          | Listeria_monocytogenes_1639_v38 | 0.941  |
| Listeria_monocytogenes_1639_v60                          | Listeria_monocytogenes_1639_v38 | 0.9332 |
| Listeria_monocytogenes_1639_v5                           | Listeria_monocytogenes_1639_v38 | 0.896  |
| Listeria_monocytogenes_1639_v59                          | Listeria_monocytogenes_1639_v38 | 0.9283 |
| Listeria_monocytogenes_1639_v58                          | Listeria_monocytogenes_1639_v38 | 0.9283 |
| Listeria_monocytogenes_1639_v57                          | Listeria_monocytogenes_1639_v38 | 0.9107 |
| Listeria_monocytogenes_1639_v56                          | Listeria_monocytogenes_1639_v38 | 0.9231 |
| Listeria_monocytogenes_1639_v55                          | Listeria_monocytogenes_1639_v38 | 0.9066 |
| Listeria_monocytogenes_1639_v54                          | Listeria_monocytogenes_1639_v38 | 0.9091 |
| Listeria_monocytogenes_1639_v53                          | Listeria_monocytogenes_1639_v38 | 0.9354 |
| Listeria_monocytogenes_1639_v52                          | Listeria_monocytogenes_1639_v38 | 0.9159 |
| Listeria_monocytogenes_1639_v51                          | Listeria_monocytogenes_1639_v38 | 0.9169 |
| Listeria_monocytogenes_1639_v50                          | Listeria_monocytogenes_1639_v38 | 0.9364 |
| Listeria_monocytogenes_1639_v4                           | Listeria_monocytogenes_1639_v38 | 0.9085 |
| Listeria_monocytogenes_1639_v49                          | Listeria_monocytogenes_1639_v38 | 0.9262 |
| Listeria_monocytogenes_1639_v48                          | Listeria_monocytogenes_1639_v38 | 0.9603 |
| Listeria_monocytogenes_1639_v47                          | Listeria_monocytogenes_1639_v38 | 0.9386 |
| Listeria_monocytogenes_1639_v46                          | Listeria_monocytogenes_1639_v38 | 0.9432 |
| Listeria_monocytogenes_1639_v45                          | Listeria_monocytogenes_1639_v38 | 0.9286 |
| Listeria_monocytogenes_1639_v44                          | Listeria_monocytogenes_1639_v38 | 0.9378 |
| Listeria_monocytogenes_1639_v43                          | Listeria_monocytogenes_1639_v38 | 0.9378 |
| Listeria_monocytogenes_1639_v42                          | Listeria_monocytogenes_1639_v38 | 0.9261 |
| Listeria_monocytogenes_1639_v41                          | Listeria_monocytogenes_1639_v38 | 0.9158 |
| Listeria_monocytogenes_1639_v40                          | Listeria_monocytogenes_1639_v38 | 0.9641 |

|                                                          |                                 |        |
|----------------------------------------------------------|---------------------------------|--------|
| Listeria_monocytogenes_1639_v3                           | Listeria_monocytogenes_1639_v38 | 0.9088 |
| Listeria_monocytogenes_1639_v39                          | Listeria_monocytogenes_1639_v38 | 0.9335 |
| Listeria_monocytogenes_1639_v38                          | Listeria_monocytogenes_1639_v38 | 0.0686 |
| Listeria_welshimeri_1643                                 | Listeria_monocytogenes_1639_v39 | 0.8669 |
| Listeria_welshimeri_serovar_6b_str_SLCC5334_386043       | Listeria_monocytogenes_1639_v39 | 0.8665 |
| Listeria_seeligeri_serovar_1_2b_str_SLCC3954_683837      | Listeria_monocytogenes_1639_v39 | 0.8761 |
| Listeria_seeligeri_FSL_S4-171_702452                     | Listeria_monocytogenes_1639_v39 | 0.8212 |
| Listeria_seeligeri_FSL_N1-067_702453                     | Listeria_monocytogenes_1639_v39 | 0.8407 |
| Listeria_seeligeri_1640_v1                               | Listeria_monocytogenes_1639_v39 | 0.8811 |
| Listeria_seeligeri_1640                                  | Listeria_monocytogenes_1639_v39 | 0.8752 |
| Listeria_monocytogenes_WSLC1042_1457188                  | Listeria_monocytogenes_1639_v39 | 0.9411 |
| Listeria_monocytogenes_WSLC1001_1457187                  | Listeria_monocytogenes_1639_v39 | 0.9384 |
| Listeria_monocytogenes_SLCC7179_879090                   | Listeria_monocytogenes_1639_v39 | 0.9318 |
| Listeria_monocytogenes_SLCC5850_882096                   | Listeria_monocytogenes_1639_v39 | 0.9366 |
| Listeria_monocytogenes_SLCC2755_932919                   | Listeria_monocytogenes_1639_v39 | 0.9379 |
| Listeria_monocytogenes_SLCC2540_879089                   | Listeria_monocytogenes_1639_v39 | 0.957  |
| Listeria_monocytogenes_SLCC2479_882020                   | Listeria_monocytogenes_1639_v39 | 0.9488 |
| Listeria_monocytogenes_SLCC2378_879088                   | Listeria_monocytogenes_1639_v39 | 0.9422 |
| Listeria_monocytogenes_SLCC2376_882097                   | Listeria_monocytogenes_1639_v39 | 0.9236 |
| Listeria_monocytogenes_SLCC2372_932920                   | Listeria_monocytogenes_1639_v39 | 0.9411 |
| Listeria_monocytogenes_serotype_4b_str_LL195_1230340     | Listeria_monocytogenes_1639_v39 | 0.9456 |
| Listeria_monocytogenes_serotype_4b_str_LIS0087_1134669   | Listeria_monocytogenes_1639_v39 | 0.9228 |
| Listeria_monocytogenes_serotype_4b_str_F2365_265669      | Listeria_monocytogenes_1639_v39 | 0.9456 |
| Listeria_monocytogenes_serotype_4b_str_CLIP_80459_568819 | Listeria_monocytogenes_1639_v39 | 0.944  |
| Listeria_monocytogenes_serotype_4b_str_81-0861_1196161   | Listeria_monocytogenes_1639_v39 | 0.9402 |
| Listeria_monocytogenes_serotype_4b_str_81-0592_1196160   | Listeria_monocytogenes_1639_v39 | 0.9413 |
| Listeria_monocytogenes_serotype_4b_str_81-0558_1196159   | Listeria_monocytogenes_1639_v39 | 0.9401 |
| Listeria_monocytogenes_serotype_4b_str_10-0809_1196162   | Listeria_monocytogenes_1639_v39 | 0.9413 |
| Listeria_monocytogenes_serotype_4b_str_02-6680_1196175   | Listeria_monocytogenes_1639_v39 | 0.9453 |
| Listeria_monocytogenes_serotype_4b_str_02-6679_1196174   | Listeria_monocytogenes_1639_v39 | 0.9453 |
| Listeria_monocytogenes_serotype_4b_str_02-1792_1196173   | Listeria_monocytogenes_1639_v39 | 0.9428 |
| Listeria_monocytogenes_serotype_4b_str_02-1289_1196172   | Listeria_monocytogenes_1639_v39 | 0.9428 |
| Listeria_monocytogenes_serotype_4b_str_02-1103_1196171   | Listeria_monocytogenes_1639_v39 | 0.9428 |
| Listeria_monocytogenes_serotype_3c_str_10-5027_1196195   | Listeria_monocytogenes_1639_v39 | 0.9488 |
| Listeria_monocytogenes_serotype_1_2c_str_10-5026_1196194 | Listeria_monocytogenes_1639_v39 | 0.9492 |
| Listeria_monocytogenes_serotype_1_2c_str_10-5025_1196193 | Listeria_monocytogenes_1639_v39 | 0.9492 |
| Listeria_monocytogenes_serotype_1_2b_str_10-0811_1196164 | Listeria_monocytogenes_1639_v39 | 0.9542 |
| Listeria_monocytogenes_serotype_1_2b_str_10-0810_1196163 | Listeria_monocytogenes_1639_v39 | 0.9542 |
| Listeria_monocytogenes_serotype_1_2a_str_99-6370_1196179 | Listeria_monocytogenes_1639_v39 | 0.929  |
| Listeria_monocytogenes_serotype_1_2a_str_98-2035_1196178 | Listeria_monocytogenes_1639_v39 | 0.929  |
| Listeria_monocytogenes_serotype_1_2a_str_95-0093_1196177 | Listeria_monocytogenes_1639_v39 | 0.9348 |
| Listeria_monocytogenes_serotype_1_2a_str_88-0478_1196176 | Listeria_monocytogenes_1639_v39 | 0.934  |
| Listeria_monocytogenes_serotype_1_2a_str_10-5024_1196192 | Listeria_monocytogenes_1639_v39 | 0.9344 |
| Listeria_monocytogenes_serotype_1_2a_str_10-4758_1196168 | Listeria_monocytogenes_1639_v39 | 0.939  |
| Listeria_monocytogenes_serotype_1_2a_str_10-4754_1196167 | Listeria_monocytogenes_1639_v39 | 0.9393 |
| Listeria_monocytogenes_serotype_1_2a_str_10-1321_1196191 | Listeria_monocytogenes_1639_v39 | 0.9344 |
| Listeria_monocytogenes_serotype_1_2a_str_10-1047_1196190 | Listeria_monocytogenes_1639_v39 | 0.9358 |
| Listeria_monocytogenes_serotype_1_2a_str_10-1046_1196189 | Listeria_monocytogenes_1639_v39 | 0.9358 |
| Listeria_monocytogenes_serotype_1_2a_str_10-0934_1196170 | Listeria_monocytogenes_1639_v39 | 0.9362 |
| Listeria_monocytogenes_serotype_1_2a_str_10-0933_1196169 | Listeria_monocytogenes_1639_v39 | 0.9362 |
| Listeria_monocytogenes_serotype_1_2a_str_10-0815_1196188 | Listeria_monocytogenes_1639_v39 | 0.9303 |
| Listeria_monocytogenes_serotype_1_2a_str_10-0814_1196187 | Listeria_monocytogenes_1639_v39 | 0.9348 |
| Listeria_monocytogenes_serotype_1_2a_str_10-0813_1196166 | Listeria_monocytogenes_1639_v39 | 0.9415 |
| Listeria_monocytogenes_serotype_1_2a_str_10-0812_1196165 | Listeria_monocytogenes_1639_v39 | 0.9415 |
| Listeria_monocytogenes_serotype_1_2a_str_08-7669_1196186 | Listeria_monocytogenes_1639_v39 | 0.9308 |
| Listeria_monocytogenes_serotype_1_2a_str_08-7374_1196185 | Listeria_monocytogenes_1639_v39 | 0.9344 |
| Listeria_monocytogenes_serotype_1_2a_str_08-6997_1196184 | Listeria_monocytogenes_1639_v39 | 0.9303 |
| Listeria_monocytogenes_serotype_1_2a_str_08-6569_1196183 | Listeria_monocytogenes_1639_v39 | 0.9303 |
| Listeria_monocytogenes_serotype_1_2a_str_08-6056_1196182 | Listeria_monocytogenes_1639_v39 | 0.9303 |
| Listeria_monocytogenes_serotype_1_2a_str_04-5457_1196181 | Listeria_monocytogenes_1639_v39 | 0.9344 |
| Listeria_monocytogenes_serotype_1_2a_str_02-5993_1196180 | Listeria_monocytogenes_1639_v39 | 0.9344 |
| Listeria_monocytogenes_R479a_1437838                     | Listeria_monocytogenes_1639_v39 | 0.9348 |
| Listeria_monocytogenes_N53-1_1234142                     | Listeria_monocytogenes_1639_v39 | 0.8868 |
| Listeria_monocytogenes_M7_1030009                        | Listeria_monocytogenes_1639_v39 | 0.9021 |
| Listeria_monocytogenes_LO28_393132                       | Listeria_monocytogenes_1639_v39 | 0.9437 |
| Listeria_monocytogenes_L99_563174                        | Listeria_monocytogenes_1639_v39 | 0.9025 |
| Listeria_monocytogenes_L312_882094                       | Listeria_monocytogenes_1639_v39 | 0.9444 |
| Listeria_monocytogenes_J1816_930781                      | Listeria_monocytogenes_1639_v39 | 0.9397 |
| Listeria_monocytogenes_J1-220_930782                     | Listeria_monocytogenes_1639_v39 | 0.9421 |
| Listeria_monocytogenes_J0161_393130                      | Listeria_monocytogenes_1639_v39 | 0.937  |
| Listeria_monocytogenes_HCC23_552536                      | Listeria_monocytogenes_1639_v39 | 0.9018 |
| Listeria_monocytogenes_FSL_R2-561_393126                 | Listeria_monocytogenes_1639_v39 | 0.9452 |
| Listeria_monocytogenes_FSL_J1-208_393119                 | Listeria_monocytogenes_1639_v39 | 0.8998 |
| Listeria_monocytogenes_FSL_J1-175_393118                 | Listeria_monocytogenes_1639_v39 | 0.9771 |
| Listeria_monocytogenes_Finland_1998_393127               | Listeria_monocytogenes_1639_v39 | 0.9332 |
| Listeria_monocytogenes_EGD-e_169963_v1                   | Listeria_monocytogenes_1639_v39 | 0.9357 |
| Listeria_monocytogenes_EGD-e_169963                      | Listeria_monocytogenes_1639_v39 | 0.936  |
| Listeria_monocytogenes_EGD_1334565                       | Listeria_monocytogenes_1639_v39 | 0.9373 |
| Listeria_monocytogenes_CFSAN002349_1299895               | Listeria_monocytogenes_1639_v39 | 0.9483 |
| Listeria_monocytogenes_ATCC_19117_882095_v1              | Listeria_monocytogenes_1639_v39 | 0.9447 |
| Listeria_monocytogenes_ATCC_19117_882095                 | Listeria_monocytogenes_1639_v39 | 0.9443 |
| Listeria_monocytogenes_6179_1288295                      | Listeria_monocytogenes_1639_v39 | 0.9346 |
| Listeria_monocytogenes_1639_v9                           | Listeria_monocytogenes_1639_v39 | 0.9672 |
| Listeria_monocytogenes_1639_v99                          | Listeria_monocytogenes_1639_v39 | 0.9393 |
| Listeria_monocytogenes_1639_v98                          | Listeria_monocytogenes_1639_v39 | 0.9296 |
| Listeria_monocytogenes_1639_v97                          | Listeria_monocytogenes_1639_v39 | 0.947  |
| Listeria_monocytogenes_1639_v96                          | Listeria_monocytogenes_1639_v39 | 0.9397 |
| Listeria_monocytogenes_1639_v95                          | Listeria_monocytogenes_1639_v39 | 0.9398 |
| Listeria_monocytogenes_1639_v94                          | Listeria_monocytogenes_1639_v39 | 0.9401 |
| Listeria_monocytogenes_1639_v93                          | Listeria_monocytogenes_1639_v39 | 0.9296 |
| Listeria_monocytogenes_1639_v92                          | Listeria_monocytogenes_1639_v39 | 0.9397 |

|                                                          |                                 |        |
|----------------------------------------------------------|---------------------------------|--------|
| Listeria_monocytogenes_1639_v91                          | Listeria_monocytogenes_1639_v39 | 0.9415 |
| Listeria_monocytogenes_1639_v90                          | Listeria_monocytogenes_1639_v39 | 0.9296 |
| Listeria_monocytogenes_1639_v8                           | Listeria_monocytogenes_1639_v39 | 0.9232 |
| Listeria_monocytogenes_1639_v89                          | Listeria_monocytogenes_1639_v39 | 0.9457 |
| Listeria_monocytogenes_1639_v88                          | Listeria_monocytogenes_1639_v39 | 0.9454 |
| Listeria_monocytogenes_1639_v87                          | Listeria_monocytogenes_1639_v39 | 0.9352 |
| Listeria_monocytogenes_1639_v86                          | Listeria_monocytogenes_1639_v39 | 0.9344 |
| Listeria_monocytogenes_1639_v85                          | Listeria_monocytogenes_1639_v39 | 0.9399 |
| Listeria_monocytogenes_1639_v84                          | Listeria_monocytogenes_1639_v39 | 0.9448 |
| Listeria_monocytogenes_1639_v83                          | Listeria_monocytogenes_1639_v39 | 0.9408 |
| Listeria_monocytogenes_1639_v82                          | Listeria_monocytogenes_1639_v39 | 0.9401 |
| Listeria_monocytogenes_1639_v81                          | Listeria_monocytogenes_1639_v39 | 0.945  |
| Listeria_monocytogenes_1639_v80                          | Listeria_monocytogenes_1639_v39 | 0.9542 |
| Listeria_monocytogenes_1639_v7                           | Listeria_monocytogenes_1639_v39 | 0.9232 |
| Listeria_monocytogenes_1639_v79                          | Listeria_monocytogenes_1639_v39 | 0.9491 |
| Listeria_monocytogenes_1639_v78                          | Listeria_monocytogenes_1639_v39 | 0.9477 |
| Listeria_monocytogenes_1639_v77                          | Listeria_monocytogenes_1639_v39 | 0.9336 |
| Listeria_monocytogenes_1639_v76                          | Listeria_monocytogenes_1639_v39 | 0.9373 |
| Listeria_monocytogenes_1639_v75                          | Listeria_monocytogenes_1639_v39 | 0.9025 |
| Listeria_monocytogenes_1639_v74                          | Listeria_monocytogenes_1639_v39 | 0.9196 |
| Listeria_monocytogenes_1639_v73                          | Listeria_monocytogenes_1639_v39 | 0.9348 |
| Listeria_monocytogenes_1639_v72                          | Listeria_monocytogenes_1639_v39 | 0.9419 |
| Listeria_monocytogenes_1639_v71                          | Listeria_monocytogenes_1639_v39 | 0.925  |
| Listeria_monocytogenes_1639_v70                          | Listeria_monocytogenes_1639_v39 | 0.945  |
| Listeria_monocytogenes_1639_v6                           | Listeria_monocytogenes_1639_v39 | 0.9229 |
| Listeria_monocytogenes_1639_v69                          | Listeria_monocytogenes_1639_v39 | 0.9413 |
| Listeria_monocytogenes_1639_v68                          | Listeria_monocytogenes_1639_v39 | 0.9308 |
| Listeria_monocytogenes_1639_v67                          | Listeria_monocytogenes_1639_v39 | 0.9821 |
| Listeria_monocytogenes_1639_v66                          | Listeria_monocytogenes_1639_v39 | 0.9357 |
| Listeria_monocytogenes_1639_v65                          | Listeria_monocytogenes_1639_v39 | 0.9331 |
| Listeria_monocytogenes_1639_v64                          | Listeria_monocytogenes_1639_v39 | 0.9335 |
| Listeria_monocytogenes_1639_v63                          | Listeria_monocytogenes_1639_v39 | 0.9549 |
| Listeria_monocytogenes_1639_v62                          | Listeria_monocytogenes_1639_v39 | 0.9397 |
| Listeria_monocytogenes_1639_v61                          | Listeria_monocytogenes_1639_v39 | 0.9364 |
| Listeria_monocytogenes_1639_v60                          | Listeria_monocytogenes_1639_v39 | 0.9394 |
| Listeria_monocytogenes_1639_v5                           | Listeria_monocytogenes_1639_v39 | 0.9086 |
| Listeria_monocytogenes_1639_v59                          | Listeria_monocytogenes_1639_v39 | 0.9419 |
| Listeria_monocytogenes_1639_v58                          | Listeria_monocytogenes_1639_v39 | 0.9427 |
| Listeria_monocytogenes_1639_v57                          | Listeria_monocytogenes_1639_v39 | 0.9352 |
| Listeria_monocytogenes_1639_v56                          | Listeria_monocytogenes_1639_v39 | 0.9475 |
| Listeria_monocytogenes_1639_v55                          | Listeria_monocytogenes_1639_v39 | 0.934  |
| Listeria_monocytogenes_1639_v54                          | Listeria_monocytogenes_1639_v39 | 0.9209 |
| Listeria_monocytogenes_1639_v53                          | Listeria_monocytogenes_1639_v39 | 0.9237 |
| Listeria_monocytogenes_1639_v52                          | Listeria_monocytogenes_1639_v39 | 0.9436 |
| Listeria_monocytogenes_1639_v51                          | Listeria_monocytogenes_1639_v39 | 0.9367 |
| Listeria_monocytogenes_1639_v50                          | Listeria_monocytogenes_1639_v39 | 0.9337 |
| Listeria_monocytogenes_1639_v4                           | Listeria_monocytogenes_1639_v39 | 0.9217 |
| Listeria_monocytogenes_1639_v49                          | Listeria_monocytogenes_1639_v39 | 0.9343 |
| Listeria_monocytogenes_1639_v48                          | Listeria_monocytogenes_1639_v39 | 0.9436 |
| Listeria_monocytogenes_1639_v47                          | Listeria_monocytogenes_1639_v39 | 0.9333 |
| Listeria_monocytogenes_1639_v46                          | Listeria_monocytogenes_1639_v39 | 0.9346 |
| Listeria_monocytogenes_1639_v45                          | Listeria_monocytogenes_1639_v39 | 0.9252 |
| Listeria_monocytogenes_1639_v44                          | Listeria_monocytogenes_1639_v39 | 0.9344 |
| Listeria_monocytogenes_1639_v43                          | Listeria_monocytogenes_1639_v39 | 0.9344 |
| Listeria_monocytogenes_1639_v42                          | Listeria_monocytogenes_1639_v39 | 0.9219 |
| Listeria_monocytogenes_1639_v41                          | Listeria_monocytogenes_1639_v39 | 0.9091 |
| Listeria_monocytogenes_1639_v40                          | Listeria_monocytogenes_1639_v39 | 0.9352 |
| Listeria_monocytogenes_1639_v3                           | Listeria_monocytogenes_1639_v39 | 0.922  |
| Listeria_monocytogenes_1639_v39                          | Listeria_monocytogenes_1639_v39 | 0.0677 |
| Listeria_welshimeri_1643                                 | Listeria_monocytogenes_1639_v3  | 0.844  |
| Listeria_welshimeri_serovar_6b_str_SLCC5334_386043       | Listeria_monocytogenes_1639_v3  | 0.8437 |
| Listeria_seeligeri_serovar_1_2b_str_SLCC3954_683837      | Listeria_monocytogenes_1639_v3  | 0.8558 |
| Listeria_seeligeri_FSL_S4-171_702452                     | Listeria_monocytogenes_1639_v3  | 0.7956 |
| Listeria_seeligeri_FSL_N1-067_702453                     | Listeria_monocytogenes_1639_v3  | 0.8095 |
| Listeria_seeligeri_1640_v1                               | Listeria_monocytogenes_1639_v3  | 0.8586 |
| Listeria_seeligeri_1640                                  | Listeria_monocytogenes_1639_v3  | 0.8739 |
| Listeria_monocytogenes_WSLC1042_1457188                  | Listeria_monocytogenes_1639_v3  | 0.9177 |
| Listeria_monocytogenes_WSLC1001_1457187                  | Listeria_monocytogenes_1639_v3  | 0.905  |
| Listeria_monocytogenes_SLCC7179_879090                   | Listeria_monocytogenes_1639_v3  | 0.9181 |
| Listeria_monocytogenes_SLCC5850_882096                   | Listeria_monocytogenes_1639_v3  | 0.9089 |
| Listeria_monocytogenes_SLCC2755_932919                   | Listeria_monocytogenes_1639_v3  | 0.9445 |
| Listeria_monocytogenes_SLCC2540_879089                   | Listeria_monocytogenes_1639_v3  | 0.9228 |
| Listeria_monocytogenes_SLCC2479_882020                   | Listeria_monocytogenes_1639_v3  | 0.9085 |
| Listeria_monocytogenes_SLCC2378_879088                   | Listeria_monocytogenes_1639_v3  | 0.9187 |
| Listeria_monocytogenes_SLCC2376_882097                   | Listeria_monocytogenes_1639_v3  | 0.9054 |
| Listeria_monocytogenes_SLCC2372_932920                   | Listeria_monocytogenes_1639_v3  | 0.916  |
| Listeria_monocytogenes_serotype_4b_str_LL195_1230340     | Listeria_monocytogenes_1639_v3  | 0.9238 |
| Listeria_monocytogenes_serotype_4b_str_LIS0087_1134669   | Listeria_monocytogenes_1639_v3  | 0.8982 |
| Listeria_monocytogenes_serotype_4b_str_F2365_265669      | Listeria_monocytogenes_1639_v3  | 0.9238 |
| Listeria_monocytogenes_serotype_4b_str_CLIP_80459_568819 | Listeria_monocytogenes_1639_v3  | 0.9244 |
| Listeria_monocytogenes_serotype_4b_str_81-0861_1196161   | Listeria_monocytogenes_1639_v3  | 0.9214 |
| Listeria_monocytogenes_serotype_4b_str_81-0592_1196160   | Listeria_monocytogenes_1639_v3  | 0.9224 |
| Listeria_monocytogenes_serotype_4b_str_81-0558_1196159   | Listeria_monocytogenes_1639_v3  | 0.9217 |
| Listeria_monocytogenes_serotype_4b_str_10-0809_1196162   | Listeria_monocytogenes_1639_v3  | 0.9228 |
| Listeria_monocytogenes_serotype_4b_str_02-6680_1196175   | Listeria_monocytogenes_1639_v3  | 0.9205 |
| Listeria_monocytogenes_serotype_4b_str_02-6679_1196174   | Listeria_monocytogenes_1639_v3  | 0.9205 |
| Listeria_monocytogenes_serotype_4b_str_02-1792_1196173   | Listeria_monocytogenes_1639_v3  | 0.9232 |
| Listeria_monocytogenes_serotype_4b_str_02-1289_1196172   | Listeria_monocytogenes_1639_v3  | 0.9232 |
| Listeria_monocytogenes_serotype_4b_str_02-1103_1196171   | Listeria_monocytogenes_1639_v3  | 0.9232 |
| Listeria_monocytogenes_serotype_3c_str_10-5027_1196195   | Listeria_monocytogenes_1639_v3  | 0.9099 |
| Listeria_monocytogenes_serotype_1_2c_str_10-5026_1196194 | Listeria_monocytogenes_1639_v3  | 0.9105 |

|                                                          |                                |        |
|----------------------------------------------------------|--------------------------------|--------|
| Listeria_monocytogenes_serotype_1_2c_str_10-5025_1196193 | Listeria_monocytogenes_1639_v3 | 0.9106 |
| Listeria_monocytogenes_serotype_1_2b_str_10-0811_1196164 | Listeria_monocytogenes_1639_v3 | 0.9521 |
| Listeria_monocytogenes_serotype_1_2b_str_10-0810_1196163 | Listeria_monocytogenes_1639_v3 | 0.9521 |
| Listeria_monocytogenes_serotype_1_2a_str_99-6370_1196179 | Listeria_monocytogenes_1639_v3 | 0.9068 |
| Listeria_monocytogenes_serotype_1_2a_str_98-2035_1196178 | Listeria_monocytogenes_1639_v3 | 0.9068 |
| Listeria_monocytogenes_serotype_1_2a_str_95-0093_1196177 | Listeria_monocytogenes_1639_v3 | 0.9026 |
| Listeria_monocytogenes_serotype_1_2a_str_88-0478_1196176 | Listeria_monocytogenes_1639_v3 | 0.9008 |
| Listeria_monocytogenes_serotype_1_2a_str_10-5024_1196192 | Listeria_monocytogenes_1639_v3 | 0.9026 |
| Listeria_monocytogenes_serotype_1_2a_str_10-4758_1196168 | Listeria_monocytogenes_1639_v3 | 0.9102 |
| Listeria_monocytogenes_serotype_1_2a_str_10-4754_1196167 | Listeria_monocytogenes_1639_v3 | 0.9105 |
| Listeria_monocytogenes_serotype_1_2a_str_10-1321_1196191 | Listeria_monocytogenes_1639_v3 | 0.9026 |
| Listeria_monocytogenes_serotype_1_2a_str_10-1047_1196190 | Listeria_monocytogenes_1639_v3 | 0.9029 |
| Listeria_monocytogenes_serotype_1_2a_str_10-1046_1196189 | Listeria_monocytogenes_1639_v3 | 0.9029 |
| Listeria_monocytogenes_serotype_1_2a_str_10-0934_1196170 | Listeria_monocytogenes_1639_v3 | 0.9142 |
| Listeria_monocytogenes_serotype_1_2a_str_10-0933_1196169 | Listeria_monocytogenes_1639_v3 | 0.9142 |
| Listeria_monocytogenes_serotype_1_2a_str_10-0815_1196188 | Listeria_monocytogenes_1639_v3 | 0.907  |
| Listeria_monocytogenes_serotype_1_2a_str_10-0814_1196187 | Listeria_monocytogenes_1639_v3 | 0.9029 |
| Listeria_monocytogenes_serotype_1_2a_str_10-0813_1196166 | Listeria_monocytogenes_1639_v3 | 0.9139 |
| Listeria_monocytogenes_serotype_1_2a_str_10-0812_1196165 | Listeria_monocytogenes_1639_v3 | 0.9139 |
| Listeria_monocytogenes_serotype_1_2a_str_08-7669_1196186 | Listeria_monocytogenes_1639_v3 | 0.9085 |
| Listeria_monocytogenes_serotype_1_2a_str_08-7374_1196185 | Listeria_monocytogenes_1639_v3 | 0.9026 |
| Listeria_monocytogenes_serotype_1_2a_str_08-6997_1196184 | Listeria_monocytogenes_1639_v3 | 0.907  |
| Listeria_monocytogenes_serotype_1_2a_str_08-6569_1196183 | Listeria_monocytogenes_1639_v3 | 0.907  |
| Listeria_monocytogenes_serotype_1_2a_str_08-6056_1196182 | Listeria_monocytogenes_1639_v3 | 0.907  |
| Listeria_monocytogenes_serotype_1_2a_str_04-5457_1196181 | Listeria_monocytogenes_1639_v3 | 0.9026 |
| Listeria_monocytogenes_serotype_1_2a_str_02-5993_1196180 | Listeria_monocytogenes_1639_v3 | 0.9026 |
| Listeria_monocytogenes_R479a_1437838                     | Listeria_monocytogenes_1639_v3 | 0.908  |
| Listeria_monocytogenes_N53-1_1234142                     | Listeria_monocytogenes_1639_v3 | 0.8732 |
| Listeria_monocytogenes_M7_1030009                        | Listeria_monocytogenes_1639_v3 | 0.8869 |
| Listeria_monocytogenes_LO28_393132                       | Listeria_monocytogenes_1639_v3 | 0.9144 |
| Listeria_monocytogenes_L99_563174                        | Listeria_monocytogenes_1639_v3 | 0.8873 |
| Listeria_monocytogenes_L312_882094                       | Listeria_monocytogenes_1639_v3 | 0.9248 |
| Listeria_monocytogenes_J1816_930781                      | Listeria_monocytogenes_1639_v3 | 0.9144 |
| Listeria_monocytogenes_J1-220_930782                     | Listeria_monocytogenes_1639_v3 | 0.9173 |
| Listeria_monocytogenes_J0161_393130                      | Listeria_monocytogenes_1639_v3 | 0.9144 |
| Listeria_monocytogenes_HCC23_552536                      | Listeria_monocytogenes_1639_v3 | 0.8866 |
| Listeria_monocytogenes_FSL_R2-561_393126                 | Listeria_monocytogenes_1639_v3 | 0.9078 |
| Listeria_monocytogenes_FSL_J1-208_393119                 | Listeria_monocytogenes_1639_v3 | 0.8766 |
| Listeria_monocytogenes_FSL_J1-175_393118                 | Listeria_monocytogenes_1639_v3 | 0.9247 |
| Listeria_monocytogenes_Finland_1998_393127               | Listeria_monocytogenes_1639_v3 | 0.9152 |
| Listeria_monocytogenes_EGD-e_169963_v1                   | Listeria_monocytogenes_1639_v3 | 0.9201 |
| Listeria_monocytogenes_EGD-e_169963                      | Listeria_monocytogenes_1639_v3 | 0.9205 |
| Listeria_monocytogenes_EGD_1334565                       | Listeria_monocytogenes_1639_v3 | 0.9096 |
| Listeria_monocytogenes_CFSAN002349_1299895               | Listeria_monocytogenes_1639_v3 | 0.9261 |
| Listeria_monocytogenes_ATCC_19117_882095_v1              | Listeria_monocytogenes_1639_v3 | 0.9207 |
| Listeria_monocytogenes_ATCC_19117_882095                 | Listeria_monocytogenes_1639_v3 | 0.9203 |
| Listeria_monocytogenes_6179_1288295                      | Listeria_monocytogenes_1639_v3 | 0.9091 |
| Listeria_monocytogenes_1639_v9                           | Listeria_monocytogenes_1639_v3 | 0.9353 |
| Listeria_monocytogenes_1639_v99                          | Listeria_monocytogenes_1639_v3 | 0.9246 |
| Listeria_monocytogenes_1639_v98                          | Listeria_monocytogenes_1639_v3 | 0.9215 |
| Listeria_monocytogenes_1639_v97                          | Listeria_monocytogenes_1639_v3 | 0.9178 |
| Listeria_monocytogenes_1639_v96                          | Listeria_monocytogenes_1639_v3 | 0.9239 |
| Listeria_monocytogenes_1639_v95                          | Listeria_monocytogenes_1639_v3 | 0.9239 |
| Listeria_monocytogenes_1639_v94                          | Listeria_monocytogenes_1639_v3 | 0.9242 |
| Listeria_monocytogenes_1639_v93                          | Listeria_monocytogenes_1639_v3 | 0.909  |
| Listeria_monocytogenes_1639_v92                          | Listeria_monocytogenes_1639_v3 | 0.9246 |
| Listeria_monocytogenes_1639_v91                          | Listeria_monocytogenes_1639_v3 | 0.9194 |
| Listeria_monocytogenes_1639_v90                          | Listeria_monocytogenes_1639_v3 | 0.9215 |
| Listeria_monocytogenes_1639_v8                           | Listeria_monocytogenes_1639_v3 | 0.9176 |
| Listeria_monocytogenes_1639_v89                          | Listeria_monocytogenes_1639_v3 | 0.9284 |
| Listeria_monocytogenes_1639_v88                          | Listeria_monocytogenes_1639_v3 | 0.9086 |
| Listeria_monocytogenes_1639_v87                          | Listeria_monocytogenes_1639_v3 | 0.9093 |
| Listeria_monocytogenes_1639_v86                          | Listeria_monocytogenes_1639_v3 | 0.9093 |
| Listeria_monocytogenes_1639_v85                          | Listeria_monocytogenes_1639_v3 | 0.9226 |
| Listeria_monocytogenes_1639_v84                          | Listeria_monocytogenes_1639_v3 | 0.908  |
| Listeria_monocytogenes_1639_v83                          | Listeria_monocytogenes_1639_v3 | 0.9249 |
| Listeria_monocytogenes_1639_v82                          | Listeria_monocytogenes_1639_v3 | 0.9246 |
| Listeria_monocytogenes_1639_v81                          | Listeria_monocytogenes_1639_v3 | 0.9064 |
| Listeria_monocytogenes_1639_v80                          | Listeria_monocytogenes_1639_v3 | 0.9491 |
| Listeria_monocytogenes_1639_v7                           | Listeria_monocytogenes_1639_v3 | 0.9176 |
| Listeria_monocytogenes_1639_v79                          | Listeria_monocytogenes_1639_v3 | 0.9051 |
| Listeria_monocytogenes_1639_v78                          | Listeria_monocytogenes_1639_v3 | 0.9065 |
| Listeria_monocytogenes_1639_v77                          | Listeria_monocytogenes_1639_v3 | 0.9043 |
| Listeria_monocytogenes_1639_v76                          | Listeria_monocytogenes_1639_v3 | 0.9114 |
| Listeria_monocytogenes_1639_v75                          | Listeria_monocytogenes_1639_v3 | 0.8873 |
| Listeria_monocytogenes_1639_v74                          | Listeria_monocytogenes_1639_v3 | 0.9097 |
| Listeria_monocytogenes_1639_v73                          | Listeria_monocytogenes_1639_v3 | 0.9191 |
| Listeria_monocytogenes_1639_v72                          | Listeria_monocytogenes_1639_v3 | 0.9197 |
| Listeria_monocytogenes_1639_v71                          | Listeria_monocytogenes_1639_v3 | 0.8971 |
| Listeria_monocytogenes_1639_v70                          | Listeria_monocytogenes_1639_v3 | 0.9092 |
| Listeria_monocytogenes_1639_v6                           | Listeria_monocytogenes_1639_v3 | 0.9173 |
| Listeria_monocytogenes_1639_v69                          | Listeria_monocytogenes_1639_v3 | 0.9224 |
| Listeria_monocytogenes_1639_v68                          | Listeria_monocytogenes_1639_v3 | 0.9126 |
| Listeria_monocytogenes_1639_v67                          | Listeria_monocytogenes_1639_v3 | 0.9246 |
| Listeria_monocytogenes_1639_v66                          | Listeria_monocytogenes_1639_v3 | 0.907  |
| Listeria_monocytogenes_1639_v65                          | Listeria_monocytogenes_1639_v3 | 0.9185 |
| Listeria_monocytogenes_1639_v64                          | Listeria_monocytogenes_1639_v3 | 0.9084 |
| Listeria_monocytogenes_1639_v63                          | Listeria_monocytogenes_1639_v3 | 0.9412 |
| Listeria_monocytogenes_1639_v62                          | Listeria_monocytogenes_1639_v3 | 0.913  |
| Listeria_monocytogenes_1639_v61                          | Listeria_monocytogenes_1639_v3 | 0.907  |
| Listeria_monocytogenes_1639_v60                          | Listeria_monocytogenes_1639_v3 | 0.9093 |



|                                                          |                                 |        |
|----------------------------------------------------------|---------------------------------|--------|
| Listeria_monocytogenes_1639_v5                           | Listeria_monocytogenes_1639_v3  | 0.9851 |
| Listeria_monocytogenes_1639_v59                          | Listeria_monocytogenes_1639_v3  | 0.915  |
| Listeria_monocytogenes_1639_v58                          | Listeria_monocytogenes_1639_v3  | 0.9248 |
| Listeria_monocytogenes_1639_v57                          | Listeria_monocytogenes_1639_v3  | 0.9339 |
| Listeria_monocytogenes_1639_v56                          | Listeria_monocytogenes_1639_v3  | 0.9179 |
| Listeria_monocytogenes_1639_v55                          | Listeria_monocytogenes_1639_v3  | 0.9238 |
| Listeria_monocytogenes_1639_v54                          | Listeria_monocytogenes_1639_v3  | 0.8918 |
| Listeria_monocytogenes_1639_v53                          | Listeria_monocytogenes_1639_v3  | 0.9024 |
| Listeria_monocytogenes_1639_v52                          | Listeria_monocytogenes_1639_v3  | 0.9218 |
| Listeria_monocytogenes_1639_v51                          | Listeria_monocytogenes_1639_v3  | 0.9274 |
| Listeria_monocytogenes_1639_v50                          | Listeria_monocytogenes_1639_v3  | 0.9015 |
| Listeria_monocytogenes_1639_v4                           | Listeria_monocytogenes_1639_v3  | 0.9986 |
| Listeria_monocytogenes_1639_v49                          | Listeria_monocytogenes_1639_v3  | 0.9124 |
| Listeria_monocytogenes_1639_v48                          | Listeria_monocytogenes_1639_v3  | 0.9147 |
| Listeria_monocytogenes_1639_v47                          | Listeria_monocytogenes_1639_v3  | 0.9026 |
| Listeria_monocytogenes_1639_v46                          | Listeria_monocytogenes_1639_v3  | 0.9057 |
| Listeria_monocytogenes_1639_v45                          | Listeria_monocytogenes_1639_v3  | 0.9018 |
| Listeria_monocytogenes_1639_v44                          | Listeria_monocytogenes_1639_v3  | 0.9026 |
| Listeria_monocytogenes_1639_v43                          | Listeria_monocytogenes_1639_v3  | 0.9026 |
| Listeria_monocytogenes_1639_v42                          | Listeria_monocytogenes_1639_v3  | 0.9013 |
| Listeria_monocytogenes_1639_v41                          | Listeria_monocytogenes_1639_v3  | 0.9046 |
| Listeria_monocytogenes_1639_v40                          | Listeria_monocytogenes_1639_v3  | 0.9183 |
| Listeria_monocytogenes_1639_v3                           | Listeria_monocytogenes_1639_v3  | 0.0712 |
| Listeria_welshimeri_1643                                 | Listeria_monocytogenes_1639_v40 | 0.8697 |
| Listeria_welshimeri_serovar_6b_str_SLCC5334_386043       | Listeria_monocytogenes_1639_v40 | 0.8694 |
| Listeria_seeligeri_serovar_1_2b_str_SLCC3954_683837      | Listeria_monocytogenes_1639_v40 | 0.8756 |
| Listeria_seeligeri_FSL_S4-171_702452                     | Listeria_monocytogenes_1639_v40 | 0.8094 |
| Listeria_seeligeri_FSL_N1-067_702453                     | Listeria_monocytogenes_1639_v40 | 0.83   |
| Listeria_seeligeri_1640_v1                               | Listeria_monocytogenes_1639_v40 | 0.8798 |
| Listeria_seeligeri_1640                                  | Listeria_monocytogenes_1639_v40 | 0.8668 |
| Listeria_monocytogenes_WSLC1042_1457188                  | Listeria_monocytogenes_1639_v40 | 0.9245 |
| Listeria_monocytogenes_WSLC1001_1457187                  | Listeria_monocytogenes_1639_v40 | 0.9559 |
| Listeria_monocytogenes_SLCC7179_879090                   | Listeria_monocytogenes_1639_v40 | 0.9479 |
| Listeria_monocytogenes_SLCC5850_882096                   | Listeria_monocytogenes_1639_v40 | 0.9553 |
| Listeria_monocytogenes_SLCC2755_932919                   | Listeria_monocytogenes_1639_v40 | 0.9274 |
| Listeria_monocytogenes_SLCC2540_879089                   | Listeria_monocytogenes_1639_v40 | 0.9428 |
| Listeria_monocytogenes_SLCC2479_882020                   | Listeria_monocytogenes_1639_v40 | 0.9744 |
| Listeria_monocytogenes_SLCC2378_879088                   | Listeria_monocytogenes_1639_v40 | 0.9256 |
| Listeria_monocytogenes_SLCC2376_882097                   | Listeria_monocytogenes_1639_v40 | 0.9315 |
| Listeria_monocytogenes_SLCC2372_932920                   | Listeria_monocytogenes_1639_v40 | 0.9731 |
| Listeria_monocytogenes_serotype_4b_str_LL195_1230340     | Listeria_monocytogenes_1639_v40 | 0.93   |
| Listeria_monocytogenes_serotype_4b_str_LIS0087_1134669   | Listeria_monocytogenes_1639_v40 | 0.9318 |
| Listeria_monocytogenes_serotype_4b_str_F2365_265669      | Listeria_monocytogenes_1639_v40 | 0.93   |
| Listeria_monocytogenes_serotype_4b_str_CLIP_80459_568819 | Listeria_monocytogenes_1639_v40 | 0.9326 |
| Listeria_monocytogenes_serotype_4b_str_81-0861_1196161   | Listeria_monocytogenes_1639_v40 | 0.9178 |
| Listeria_monocytogenes_serotype_4b_str_81-0592_1196160   | Listeria_monocytogenes_1639_v40 | 0.9189 |
| Listeria_monocytogenes_serotype_4b_str_81-0558_1196159   | Listeria_monocytogenes_1639_v40 | 0.9192 |
| Listeria_monocytogenes_serotype_4b_str_10-0809_1196162   | Listeria_monocytogenes_1639_v40 | 0.9189 |
| Listeria_monocytogenes_serotype_4b_str_02-6680_1196175   | Listeria_monocytogenes_1639_v40 | 0.9297 |
| Listeria_monocytogenes_serotype_4b_str_02-6679_1196174   | Listeria_monocytogenes_1639_v40 | 0.9297 |
| Listeria_monocytogenes_serotype_4b_str_02-1792_1196173   | Listeria_monocytogenes_1639_v40 | 0.9196 |
| Listeria_monocytogenes_serotype_4b_str_02-1289_1196172   | Listeria_monocytogenes_1639_v40 | 0.9196 |
| Listeria_monocytogenes_serotype_4b_str_02-1103_1196171   | Listeria_monocytogenes_1639_v40 | 0.9196 |
| Listeria_monocytogenes_serotype_3c_str_10-5027_1196195   | Listeria_monocytogenes_1639_v40 | 0.9751 |
| Listeria_monocytogenes_serotype_1_2c_str_10-5026_1196194 | Listeria_monocytogenes_1639_v40 | 0.9762 |
| Listeria_monocytogenes_serotype_1_2c_str_10-5025_1196193 | Listeria_monocytogenes_1639_v40 | 0.9762 |
| Listeria_monocytogenes_serotype_1_2b_str_10-0811_1196164 | Listeria_monocytogenes_1639_v40 | 0.9442 |
| Listeria_monocytogenes_serotype_1_2b_str_10-0810_1196163 | Listeria_monocytogenes_1639_v40 | 0.9442 |
| Listeria_monocytogenes_serotype_1_2a_str_99-6370_1196179 | Listeria_monocytogenes_1639_v40 | 0.9454 |
| Listeria_monocytogenes_serotype_1_2a_str_98-2035_1196178 | Listeria_monocytogenes_1639_v40 | 0.9454 |
| Listeria_monocytogenes_serotype_1_2a_str_95-0093_1196177 | Listeria_monocytogenes_1639_v40 | 0.9421 |
| Listeria_monocytogenes_serotype_1_2a_str_88-0478_1196176 | Listeria_monocytogenes_1639_v40 | 0.9435 |
| Listeria_monocytogenes_serotype_1_2a_str_10-5024_1196192 | Listeria_monocytogenes_1639_v40 | 0.9428 |
| Listeria_monocytogenes_serotype_1_2a_str_10-4758_1196168 | Listeria_monocytogenes_1639_v40 | 0.9576 |
| Listeria_monocytogenes_serotype_1_2a_str_10-4754_1196167 | Listeria_monocytogenes_1639_v40 | 0.958  |
| Listeria_monocytogenes_serotype_1_2a_str_10-1321_1196191 | Listeria_monocytogenes_1639_v40 | 0.9428 |
| Listeria_monocytogenes_serotype_1_2a_str_10-1047_1196190 | Listeria_monocytogenes_1639_v40 | 0.9428 |
| Listeria_monocytogenes_serotype_1_2a_str_10-1046_1196189 | Listeria_monocytogenes_1639_v40 | 0.9428 |
| Listeria_monocytogenes_serotype_1_2a_str_10-0934_1196170 | Listeria_monocytogenes_1639_v40 | 0.9552 |
| Listeria_monocytogenes_serotype_1_2a_str_10-0933_1196169 | Listeria_monocytogenes_1639_v40 | 0.9552 |
| Listeria_monocytogenes_serotype_1_2a_str_10-0815_1196188 | Listeria_monocytogenes_1639_v40 | 0.946  |
| Listeria_monocytogenes_serotype_1_2a_str_10-0814_1196187 | Listeria_monocytogenes_1639_v40 | 0.9428 |
| Listeria_monocytogenes_serotype_1_2a_str_10-0813_1196166 | Listeria_monocytogenes_1639_v40 | 0.9504 |
| Listeria_monocytogenes_serotype_1_2a_str_10-0812_1196165 | Listeria_monocytogenes_1639_v40 | 0.9504 |
| Listeria_monocytogenes_serotype_1_2a_str_08-7669_1196186 | Listeria_monocytogenes_1639_v40 | 0.9381 |
| Listeria_monocytogenes_serotype_1_2a_str_08-7374_1196185 | Listeria_monocytogenes_1639_v40 | 0.9428 |
| Listeria_monocytogenes_serotype_1_2a_str_08-6997_1196184 | Listeria_monocytogenes_1639_v40 | 0.946  |
| Listeria_monocytogenes_serotype_1_2a_str_08-6569_1196183 | Listeria_monocytogenes_1639_v40 | 0.946  |
| Listeria_monocytogenes_serotype_1_2a_str_08-6056_1196182 | Listeria_monocytogenes_1639_v40 | 0.946  |
| Listeria_monocytogenes_serotype_1_2a_str_04-5457_1196181 | Listeria_monocytogenes_1639_v40 | 0.9428 |
| Listeria_monocytogenes_serotype_1_2a_str_02-5993_1196180 | Listeria_monocytogenes_1639_v40 | 0.9428 |
| Listeria_monocytogenes_R479a_1437838                     | Listeria_monocytogenes_1639_v40 | 0.9443 |
| Listeria_monocytogenes_N53-1_1234142                     | Listeria_monocytogenes_1639_v40 | 0.904  |
| Listeria_monocytogenes_M7_1030009                        | Listeria_monocytogenes_1639_v40 | 0.9076 |
| Listeria_monocytogenes_LO28_393132                       | Listeria_monocytogenes_1639_v40 | 0.9733 |
| Listeria_monocytogenes_L99_563174                        | Listeria_monocytogenes_1639_v40 | 0.9079 |
| Listeria_monocytogenes_L312_882094                       | Listeria_monocytogenes_1639_v40 | 0.9326 |
| Listeria_monocytogenes_J1816_930781                      | Listeria_monocytogenes_1639_v40 | 0.9159 |
| Listeria_monocytogenes_J1-220_930782                     | Listeria_monocytogenes_1639_v40 | 0.9192 |
| Listeria_monocytogenes_J0161_393130                      | Listeria_monocytogenes_1639_v40 | 0.9366 |
| Listeria_monocytogenes_HCC23_552536                      | Listeria_monocytogenes_1639_v40 | 0.9072 |

|                                                     |                                 |        |
|-----------------------------------------------------|---------------------------------|--------|
| Listeria_monocytogenes_FSL_R2-561_393126            | Listeria_monocytogenes_1639_v40 | 0.9733 |
| Listeria_monocytogenes_FSL_J1-208_393119            | Listeria_monocytogenes_1639_v40 | 0.897  |
| Listeria_monocytogenes_FSL_J1-175_393118            | Listeria_monocytogenes_1639_v40 | 0.9422 |
| Listeria_monocytogenes_Finland_1998_393127          | Listeria_monocytogenes_1639_v40 | 0.9491 |
| Listeria_monocytogenes_EGD-e_169963_v1              | Listeria_monocytogenes_1639_v40 | 0.9633 |
| Listeria_monocytogenes_EGD-e_169963                 | Listeria_monocytogenes_1639_v40 | 0.9633 |
| Listeria_monocytogenes_EGD_1334565                  | Listeria_monocytogenes_1639_v40 | 0.956  |
| Listeria_monocytogenes_CFSAN002349_1299895          | Listeria_monocytogenes_1639_v40 | 0.9332 |
| Listeria_monocytogenes_ATCC_19117_882095_v1         | Listeria_monocytogenes_1639_v40 | 0.9257 |
| Listeria_monocytogenes_ATCC_19117_882095            | Listeria_monocytogenes_1639_v40 | 0.9254 |
| Listeria_monocytogenes_6179_1288295                 | Listeria_monocytogenes_1639_v40 | 0.9393 |
| Listeria_monocytogenes_1639_v9                      | Listeria_monocytogenes_1639_v40 | 0.9198 |
| Listeria_monocytogenes_1639_v99                     | Listeria_monocytogenes_1639_v40 | 0.9215 |
| Listeria_monocytogenes_1639_v98                     | Listeria_monocytogenes_1639_v40 | 0.9215 |
| Listeria_monocytogenes_1639_v97                     | Listeria_monocytogenes_1639_v40 | 0.9454 |
| Listeria_monocytogenes_1639_v96                     | Listeria_monocytogenes_1639_v40 | 0.9201 |
| Listeria_monocytogenes_1639_v95                     | Listeria_monocytogenes_1639_v40 | 0.9215 |
| Listeria_monocytogenes_1639_v94                     | Listeria_monocytogenes_1639_v40 | 0.9216 |
| Listeria_monocytogenes_1639_v93                     | Listeria_monocytogenes_1639_v40 | 0.9219 |
| Listeria_monocytogenes_1639_v92                     | Listeria_monocytogenes_1639_v40 | 0.9472 |
| Listeria_monocytogenes_1639_v91                     | Listeria_monocytogenes_1639_v40 | 0.9215 |
| Listeria_monocytogenes_1639_v90                     | Listeria_monocytogenes_1639_v40 | 0.9232 |
| Listeria_monocytogenes_1639_v8                      | Listeria_monocytogenes_1639_v40 | 0.9454 |
| Listeria_monocytogenes_1639_v89                     | Listeria_monocytogenes_1639_v40 | 0.9362 |
| Listeria_monocytogenes_1639_v88                     | Listeria_monocytogenes_1639_v40 | 0.925  |
| Listeria_monocytogenes_1639_v87                     | Listeria_monocytogenes_1639_v40 | 0.9498 |
| Listeria_monocytogenes_1639_v86                     | Listeria_monocytogenes_1639_v40 | 0.9459 |
| Listeria_monocytogenes_1639_v85                     | Listeria_monocytogenes_1639_v40 | 0.9455 |
| Listeria_monocytogenes_1639_v84                     | Listeria_monocytogenes_1639_v40 | 0.9172 |
| Listeria_monocytogenes_1639_v83                     | Listeria_monocytogenes_1639_v40 | 0.9493 |
| Listeria_monocytogenes_1639_v82                     | Listeria_monocytogenes_1639_v40 | 0.9173 |
| Listeria_monocytogenes_1639_v81                     | Listeria_monocytogenes_1639_v40 | 0.917  |
| Listeria_monocytogenes_1639_v80                     | Listeria_monocytogenes_1639_v40 | 0.9494 |
| Listeria_monocytogenes_1639_v7                      | Listeria_monocytogenes_1639_v40 | 0.9381 |
| Listeria_monocytogenes_1639_v79                     | Listeria_monocytogenes_1639_v40 | 0.9362 |
| Listeria_monocytogenes_1639_v78                     | Listeria_monocytogenes_1639_v40 | 0.9443 |
| Listeria_monocytogenes_1639_v77                     | Listeria_monocytogenes_1639_v40 | 0.9494 |
| Listeria_monocytogenes_1639_v76                     | Listeria_monocytogenes_1639_v40 | 0.9384 |
| Listeria_monocytogenes_1639_v75                     | Listeria_monocytogenes_1639_v40 | 0.952  |
| Listeria_monocytogenes_1639_v74                     | Listeria_monocytogenes_1639_v40 | 0.9079 |
| Listeria_monocytogenes_1639_v73                     | Listeria_monocytogenes_1639_v40 | 0.9351 |
| Listeria_monocytogenes_1639_v72                     | Listeria_monocytogenes_1639_v40 | 0.9775 |
| Listeria_monocytogenes_1639_v71                     | Listeria_monocytogenes_1639_v40 | 0.9157 |
| Listeria_monocytogenes_1639_v70                     | Listeria_monocytogenes_1639_v40 | 0.9345 |
| Listeria_monocytogenes_1639_v6                      | Listeria_monocytogenes_1639_v40 | 0.9789 |
| Listeria_monocytogenes_1639_v69                     | Listeria_monocytogenes_1639_v40 | 0.9359 |
| Listeria_monocytogenes_1639_v68                     | Listeria_monocytogenes_1639_v40 | 0.9189 |
| Listeria_monocytogenes_1639_v67                     | Listeria_monocytogenes_1639_v40 | 0.9397 |
| Listeria_monocytogenes_1639_v66                     | Listeria_monocytogenes_1639_v40 | 0.9348 |
| Listeria_monocytogenes_1639_v65                     | Listeria_monocytogenes_1639_v40 | 0.9569 |
| Listeria_monocytogenes_1639_v64                     | Listeria_monocytogenes_1639_v40 | 0.9538 |
| Listeria_monocytogenes_1639_v63                     | Listeria_monocytogenes_1639_v40 | 0.9591 |
| Listeria_monocytogenes_1639_v62                     | Listeria_monocytogenes_1639_v40 | 0.9389 |
| Listeria_monocytogenes_1639_v61                     | Listeria_monocytogenes_1639_v40 | 0.9518 |
| Listeria_monocytogenes_1639_v60                     | Listeria_monocytogenes_1639_v40 | 0.9441 |
| Listeria_monocytogenes_1639_v5                      | Listeria_monocytogenes_1639_v40 | 0.9389 |
| Listeria_monocytogenes_1639_v59                     | Listeria_monocytogenes_1639_v40 | 0.9056 |
| Listeria_monocytogenes_1639_v58                     | Listeria_monocytogenes_1639_v40 | 0.9251 |
| Listeria_monocytogenes_1639_v57                     | Listeria_monocytogenes_1639_v40 | 0.9236 |
| Listeria_monocytogenes_1639_v56                     | Listeria_monocytogenes_1639_v40 | 0.913  |
| Listeria_monocytogenes_1639_v55                     | Listeria_monocytogenes_1639_v40 | 0.9187 |
| Listeria_monocytogenes_1639_v54                     | Listeria_monocytogenes_1639_v40 | 0.9144 |
| Listeria_monocytogenes_1639_v53                     | Listeria_monocytogenes_1639_v40 | 0.9144 |
| Listeria_monocytogenes_1639_v52                     | Listeria_monocytogenes_1639_v40 | 0.9378 |
| Listeria_monocytogenes_1639_v51                     | Listeria_monocytogenes_1639_v40 | 0.9216 |
| Listeria_monocytogenes_1639_v50                     | Listeria_monocytogenes_1639_v40 | 0.9174 |
| Listeria_monocytogenes_1639_v4                      | Listeria_monocytogenes_1639_v40 | 0.9414 |
| Listeria_monocytogenes_1639_v49                     | Listeria_monocytogenes_1639_v40 | 0.918  |
| Listeria_monocytogenes_1639_v48                     | Listeria_monocytogenes_1639_v40 | 0.9197 |
| Listeria_monocytogenes_1639_v47                     | Listeria_monocytogenes_1639_v40 | 0.9793 |
| Listeria_monocytogenes_1639_v46                     | Listeria_monocytogenes_1639_v40 | 0.9421 |
| Listeria_monocytogenes_1639_v45                     | Listeria_monocytogenes_1639_v40 | 0.939  |
| Listeria_monocytogenes_1639_v44                     | Listeria_monocytogenes_1639_v40 | 0.9368 |
| Listeria_monocytogenes_1639_v43                     | Listeria_monocytogenes_1639_v40 | 0.9428 |
| Listeria_monocytogenes_1639_v42                     | Listeria_monocytogenes_1639_v40 | 0.9428 |
| Listeria_monocytogenes_1639_v41                     | Listeria_monocytogenes_1639_v40 | 0.9373 |
| Listeria_monocytogenes_1639_v40                     | Listeria_monocytogenes_1639_v40 | 0.9347 |
| Listeria_welshimeri_1643                            | Listeria_monocytogenes_1639_v40 | 0.0723 |
| Listeria_welshimeri_serovar_6b_str_SLCC5334_386043  | Listeria_monocytogenes_1639_v41 | 0.8516 |
| Listeria_seeligeri_serovar_1_2b_str_SLCC3954_683837 | Listeria_monocytogenes_1639_v41 | 0.851  |
| Listeria_seeligeri_FSL_S4-171_702452                | Listeria_monocytogenes_1639_v41 | 0.8542 |
| Listeria_seeligeri_FSL_N1-067_702453                | Listeria_monocytogenes_1639_v41 | 0.7983 |
| Listeria_seeligeri_1640_v1                          | Listeria_monocytogenes_1639_v41 | 0.8173 |
| Listeria_seeligeri_1640                             | Listeria_monocytogenes_1639_v41 | 0.8514 |
| Listeria_monocytogenes_WSLC1042_1457188             | Listeria_monocytogenes_1639_v41 | 0.8563 |
| Listeria_monocytogenes_WSLC1001_1457187             | Listeria_monocytogenes_1639_v41 | 0.898  |
| Listeria_monocytogenes_SLCC7179_879090              | Listeria_monocytogenes_1639_v41 | 0.9342 |
| Listeria_monocytogenes_SLCC5850_882096              | Listeria_monocytogenes_1639_v41 | 0.9358 |
| Listeria_monocytogenes_SLCC2755_932919              | Listeria_monocytogenes_1639_v41 | 0.935  |
| Listeria_monocytogenes_SLCC2540_879089              | Listeria_monocytogenes_1639_v41 | 0.9071 |
| Listeria_monocytogenes_SLCC2479_882020              | Listeria_monocytogenes_1639_v41 | 0.9122 |
|                                                     | Listeria_monocytogenes_1639_v41 | 0.9234 |

|                                                          |                                 |        |
|----------------------------------------------------------|---------------------------------|--------|
| Listeria_monocytogenes_SLCC2378_879088                   | Listeria_monocytogenes_1639_v41 | 0.899  |
| Listeria_monocytogenes_SLCC2376_882097                   | Listeria_monocytogenes_1639_v41 | 0.9055 |
| Listeria_monocytogenes_SLCC2372_932920                   | Listeria_monocytogenes_1639_v41 | 0.9251 |
| Listeria_monocytogenes_serotype_4b_str_LL195_1230340     | Listeria_monocytogenes_1639_v41 | 0.9039 |
| Listeria_monocytogenes_serotype_4b_str_LIS0087_1134669   | Listeria_monocytogenes_1639_v41 | 0.9208 |
| Listeria_monocytogenes_serotype_4b_str_F2365_265669      | Listeria_monocytogenes_1639_v41 | 0.9039 |
| Listeria_monocytogenes_serotype_4b_str_CLIP_80459_568819 | Listeria_monocytogenes_1639_v41 | 0.9093 |
| Listeria_monocytogenes_serotype_4b_str_81-0861_1196161   | Listeria_monocytogenes_1639_v41 | 0.9001 |
| Listeria_monocytogenes_serotype_4b_str_81-0592_1196160   | Listeria_monocytogenes_1639_v41 | 0.9011 |
| Listeria_monocytogenes_serotype_4b_str_81-0558_1196159   | Listeria_monocytogenes_1639_v41 | 0.9017 |
| Listeria_monocytogenes_serotype_4b_str_10-0809_1196162   | Listeria_monocytogenes_1639_v41 | 0.9011 |
| Listeria_monocytogenes_serotype_4b_str_02-6680_1196175   | Listeria_monocytogenes_1639_v41 | 0.9044 |
| Listeria_monocytogenes_serotype_4b_str_02-6679_1196174   | Listeria_monocytogenes_1639_v41 | 0.9044 |
| Listeria_monocytogenes_serotype_4b_str_02-1792_1196173   | Listeria_monocytogenes_1639_v41 | 0.9036 |
| Listeria_monocytogenes_serotype_4b_str_02-1289_1196172   | Listeria_monocytogenes_1639_v41 | 0.9036 |
| Listeria_monocytogenes_serotype_4b_str_02-1103_1196171   | Listeria_monocytogenes_1639_v41 | 0.9036 |
| Listeria_monocytogenes_serotype_3c_str_10-5027_1196195   | Listeria_monocytogenes_1639_v41 | 0.9292 |
| Listeria_monocytogenes_serotype_1_2c_str_10-5026_1196194 | Listeria_monocytogenes_1639_v41 | 0.9292 |
| Listeria_monocytogenes_serotype_1_2c_str_10-5025_1196193 | Listeria_monocytogenes_1639_v41 | 0.9292 |
| Listeria_monocytogenes_serotype_1_2b_str_10-0811_1196164 | Listeria_monocytogenes_1639_v41 | 0.9252 |
| Listeria_monocytogenes_serotype_1_2b_str_10-0810_1196163 | Listeria_monocytogenes_1639_v41 | 0.9252 |
| Listeria_monocytogenes_serotype_1_2a_str_99-6370_1196179 | Listeria_monocytogenes_1639_v41 | 0.9337 |
| Listeria_monocytogenes_serotype_1_2a_str_98-2035_1196178 | Listeria_monocytogenes_1639_v41 | 0.9337 |
| Listeria_monocytogenes_serotype_1_2a_str_95-0093_1196177 | Listeria_monocytogenes_1639_v41 | 0.9282 |
| Listeria_monocytogenes_serotype_1_2a_str_88-0478_1196176 | Listeria_monocytogenes_1639_v41 | 0.9253 |
| Listeria_monocytogenes_serotype_1_2a_str_10-5024_1196192 | Listeria_monocytogenes_1639_v41 | 0.9282 |
| Listeria_monocytogenes_serotype_1_2a_str_10-4758_1196168 | Listeria_monocytogenes_1639_v41 | 0.9296 |
| Listeria_monocytogenes_serotype_1_2a_str_10-4754_1196167 | Listeria_monocytogenes_1639_v41 | 0.9296 |
| Listeria_monocytogenes_serotype_1_2a_str_10-1321_1196191 | Listeria_monocytogenes_1639_v41 | 0.9282 |
| Listeria_monocytogenes_serotype_1_2a_str_10-1047_1196190 | Listeria_monocytogenes_1639_v41 | 0.9271 |
| Listeria_monocytogenes_serotype_1_2a_str_10-1046_1196189 | Listeria_monocytogenes_1639_v41 | 0.9271 |
| Listeria_monocytogenes_serotype_1_2a_str_10-0934_1196170 | Listeria_monocytogenes_1639_v41 | 0.9306 |
| Listeria_monocytogenes_serotype_1_2a_str_10-0933_1196169 | Listeria_monocytogenes_1639_v41 | 0.9306 |
| Listeria_monocytogenes_serotype_1_2a_str_10-0815_1196188 | Listeria_monocytogenes_1639_v41 | 0.9325 |
| Listeria_monocytogenes_serotype_1_2a_str_10-0814_1196187 | Listeria_monocytogenes_1639_v41 | 0.9282 |
| Listeria_monocytogenes_serotype_1_2a_str_10-0813_1196166 | Listeria_monocytogenes_1639_v41 | 0.9395 |
| Listeria_monocytogenes_serotype_1_2a_str_10-0812_1196165 | Listeria_monocytogenes_1639_v41 | 0.9395 |
| Listeria_monocytogenes_serotype_1_2a_str_08-7669_1196186 | Listeria_monocytogenes_1639_v41 | 0.922  |
| Listeria_monocytogenes_serotype_1_2a_str_08-7374_1196185 | Listeria_monocytogenes_1639_v41 | 0.9282 |
| Listeria_monocytogenes_serotype_1_2a_str_08-6997_1196184 | Listeria_monocytogenes_1639_v41 | 0.9325 |
| Listeria_monocytogenes_serotype_1_2a_str_08-6569_1196183 | Listeria_monocytogenes_1639_v41 | 0.9325 |
| Listeria_monocytogenes_serotype_1_2a_str_08-6056_1196182 | Listeria_monocytogenes_1639_v41 | 0.9325 |
| Listeria_monocytogenes_serotype_1_2a_str_04-5457_1196181 | Listeria_monocytogenes_1639_v41 | 0.9282 |
| Listeria_monocytogenes_serotype_1_2a_str_02-5993_1196180 | Listeria_monocytogenes_1639_v41 | 0.9279 |
| Listeria_monocytogenes_R479a_1437838                     | Listeria_monocytogenes_1639_v41 | 0.9305 |
| Listeria_monocytogenes_N53-1_1234142                     | Listeria_monocytogenes_1639_v41 | 0.8817 |
| Listeria_monocytogenes_M7_1030009                        | Listeria_monocytogenes_1639_v41 | 0.8909 |
| Listeria_monocytogenes_LO28_393132                       | Listeria_monocytogenes_1639_v41 | 0.9282 |
| Listeria_monocytogenes_L99_563174                        | Listeria_monocytogenes_1639_v41 | 0.8915 |
| Listeria_monocytogenes_L312_882094                       | Listeria_monocytogenes_1639_v41 | 0.9093 |
| Listeria_monocytogenes_J1816_930781                      | Listeria_monocytogenes_1639_v41 | 0.8993 |
| Listeria_monocytogenes_J1-220_930782                     | Listeria_monocytogenes_1639_v41 | 0.9065 |
| Listeria_monocytogenes_J0161_393130                      | Listeria_monocytogenes_1639_v41 | 0.9275 |
| Listeria_monocytogenes_HCC23_552536                      | Listeria_monocytogenes_1639_v41 | 0.8912 |
| Listeria_monocytogenes_FSL_R2-561_393126                 | Listeria_monocytogenes_1639_v41 | 0.9242 |
| Listeria_monocytogenes_FSL_J1-208_393119                 | Listeria_monocytogenes_1639_v41 | 0.8777 |
| Listeria_monocytogenes_FSL_J1-175_393118                 | Listeria_monocytogenes_1639_v41 | 0.9156 |
| Listeria_monocytogenes_Finland_1998_393127               | Listeria_monocytogenes_1639_v41 | 0.9261 |
| Listeria_monocytogenes_EGD-e_169963_v1                   | Listeria_monocytogenes_1639_v41 | 0.9264 |
| Listeria_monocytogenes_EGD-e_169963                      | Listeria_monocytogenes_1639_v41 | 0.9268 |
| Listeria_monocytogenes_EGD_1334565                       | Listeria_monocytogenes_1639_v41 | 0.9357 |
| Listeria_monocytogenes_CFSAN002349_1299895               | Listeria_monocytogenes_1639_v41 | 0.9074 |
| Listeria_monocytogenes_ATCC_19117_882095_v1              | Listeria_monocytogenes_1639_v41 | 0.9024 |
| Listeria_monocytogenes_ATCC_19117_882095                 | Listeria_monocytogenes_1639_v41 | 0.9024 |
| Listeria_monocytogenes_6179_1288295                      | Listeria_monocytogenes_1639_v41 | 0.9324 |
| Listeria_monocytogenes_1639_v9                           | Listeria_monocytogenes_1639_v41 | 0.9058 |
| Listeria_monocytogenes_1639_v99                          | Listeria_monocytogenes_1639_v41 | 0.9076 |
| Listeria_monocytogenes_1639_v98                          | Listeria_monocytogenes_1639_v41 | 0.9339 |
| Listeria_monocytogenes_1639_v97                          | Listeria_monocytogenes_1639_v41 | 0.9033 |
| Listeria_monocytogenes_1639_v96                          | Listeria_monocytogenes_1639_v41 | 0.907  |
| Listeria_monocytogenes_1639_v95                          | Listeria_monocytogenes_1639_v41 | 0.907  |
| Listeria_monocytogenes_1639_v94                          | Listeria_monocytogenes_1639_v41 | 0.9073 |
| Listeria_monocytogenes_1639_v93                          | Listeria_monocytogenes_1639_v41 | 0.9217 |
| Listeria_monocytogenes_1639_v92                          | Listeria_monocytogenes_1639_v41 | 0.9048 |
| Listeria_monocytogenes_1639_v91                          | Listeria_monocytogenes_1639_v41 | 0.909  |
| Listeria_monocytogenes_1639_v90                          | Listeria_monocytogenes_1639_v41 | 0.9339 |
| Listeria_monocytogenes_1639_v8                           | Listeria_monocytogenes_1639_v41 | 0.9216 |
| Listeria_monocytogenes_1639_v89                          | Listeria_monocytogenes_1639_v41 | 0.9084 |
| Listeria_monocytogenes_1639_v88                          | Listeria_monocytogenes_1639_v41 | 0.9312 |
| Listeria_monocytogenes_1639_v87                          | Listeria_monocytogenes_1639_v41 | 0.9362 |
| Listeria_monocytogenes_1639_v86                          | Listeria_monocytogenes_1639_v41 | 0.9355 |
| Listeria_monocytogenes_1639_v85                          | Listeria_monocytogenes_1639_v41 | 0.9016 |
| Listeria_monocytogenes_1639_v84                          | Listeria_monocytogenes_1639_v41 | 0.9318 |
| Listeria_monocytogenes_1639_v83                          | Listeria_monocytogenes_1639_v41 | 0.9035 |
| Listeria_monocytogenes_1639_v82                          | Listeria_monocytogenes_1639_v41 | 0.9032 |
| Listeria_monocytogenes_1639_v81                          | Listeria_monocytogenes_1639_v41 | 0.9294 |
| Listeria_monocytogenes_1639_v80                          | Listeria_monocytogenes_1639_v41 | 0.9216 |
| Listeria_monocytogenes_1639_v7                           | Listeria_monocytogenes_1639_v41 | 0.9216 |
| Listeria_monocytogenes_1639_v79                          | Listeria_monocytogenes_1639_v41 | 0.9274 |
| Listeria_monocytogenes_1639_v78                          | Listeria_monocytogenes_1639_v41 | 0.9302 |
| Listeria_monocytogenes_1639_v77                          | Listeria_monocytogenes_1639_v41 | 0.9175 |

|                                                          |                                 |        |
|----------------------------------------------------------|---------------------------------|--------|
| Listeria_monocytogenes_1639_v76                          | Listeria_monocytogenes_1639_v41 | 0.9285 |
| Listeria_monocytogenes_1639_v75                          | Listeria_monocytogenes_1639_v41 | 0.8915 |
| Listeria_monocytogenes_1639_v74                          | Listeria_monocytogenes_1639_v41 | 0.9282 |
| Listeria_monocytogenes_1639_v73                          | Listeria_monocytogenes_1639_v41 | 0.9351 |
| Listeria_monocytogenes_1639_v72                          | Listeria_monocytogenes_1639_v41 | 0.9038 |
| Listeria_monocytogenes_1639_v71                          | Listeria_monocytogenes_1639_v41 | 0.9165 |
| Listeria_monocytogenes_1639_v70                          | Listeria_monocytogenes_1639_v41 | 0.9255 |
| Listeria_monocytogenes_1639_v6                           | Listeria_monocytogenes_1639_v41 | 0.9209 |
| Listeria_monocytogenes_1639_v69                          | Listeria_monocytogenes_1639_v41 | 0.9014 |
| Listeria_monocytogenes_1639_v68                          | Listeria_monocytogenes_1639_v41 | 0.9213 |
| Listeria_monocytogenes_1639_v67                          | Listeria_monocytogenes_1639_v41 | 0.9097 |
| Listeria_monocytogenes_1639_v66                          | Listeria_monocytogenes_1639_v41 | 0.9312 |
| Listeria_monocytogenes_1639_v65                          | Listeria_monocytogenes_1639_v41 | 0.9468 |
| Listeria_monocytogenes_1639_v64                          | Listeria_monocytogenes_1639_v41 | 0.9371 |
| Listeria_monocytogenes_1639_v63                          | Listeria_monocytogenes_1639_v41 | 0.9218 |
| Listeria_monocytogenes_1639_v62                          | Listeria_monocytogenes_1639_v41 | 0.9358 |
| Listeria_monocytogenes_1639_v61                          | Listeria_monocytogenes_1639_v41 | 0.9305 |
| Listeria_monocytogenes_1639_v60                          | Listeria_monocytogenes_1639_v41 | 0.9239 |
| Listeria_monocytogenes_1639_v5                           | Listeria_monocytogenes_1639_v41 | 0.8965 |
| Listeria_monocytogenes_1639_v59                          | Listeria_monocytogenes_1639_v41 | 0.9042 |
| Listeria_monocytogenes_1639_v58                          | Listeria_monocytogenes_1639_v41 | 0.9038 |
| Listeria_monocytogenes_1639_v57                          | Listeria_monocytogenes_1639_v41 | 0.8926 |
| Listeria_monocytogenes_1639_v56                          | Listeria_monocytogenes_1639_v41 | 0.8998 |
| Listeria_monocytogenes_1639_v55                          | Listeria_monocytogenes_1639_v41 | 0.9066 |
| Listeria_monocytogenes_1639_v54                          | Listeria_monocytogenes_1639_v41 | 0.8988 |
| Listeria_monocytogenes_1639_v53                          | Listeria_monocytogenes_1639_v41 | 0.9341 |
| Listeria_monocytogenes_1639_v52                          | Listeria_monocytogenes_1639_v41 | 0.9114 |
| Listeria_monocytogenes_1639_v51                          | Listeria_monocytogenes_1639_v41 | 0.9069 |
| Listeria_monocytogenes_1639_v50                          | Listeria_monocytogenes_1639_v41 | 0.9271 |
| Listeria_monocytogenes_1639_v4                           | Listeria_monocytogenes_1639_v41 | 0.9039 |
| Listeria_monocytogenes_1639_v49                          | Listeria_monocytogenes_1639_v41 | 0.8942 |
| Listeria_monocytogenes_1639_v48                          | Listeria_monocytogenes_1639_v41 | 0.9343 |
| Listeria_monocytogenes_1639_v47                          | Listeria_monocytogenes_1639_v41 | 0.9261 |
| Listeria_monocytogenes_1639_v46                          | Listeria_monocytogenes_1639_v41 | 0.9148 |
| Listeria_monocytogenes_1639_v45                          | Listeria_monocytogenes_1639_v41 | 0.9254 |
| Listeria_monocytogenes_1639_v44                          | Listeria_monocytogenes_1639_v41 | 0.9282 |
| Listeria_monocytogenes_1639_v43                          | Listeria_monocytogenes_1639_v41 | 0.9282 |
| Listeria_monocytogenes_1639_v42                          | Listeria_monocytogenes_1639_v41 | 0.9412 |
| Listeria_monocytogenes_1639_v41                          | Listeria_monocytogenes_1639_v41 | 0.0773 |
| Listeria_welshimeri_1643                                 | Listeria_monocytogenes_1639_v42 | 0.8577 |
| Listeria_welshimeri_serovar_6b_str_SLCC5334_386043       | Listeria_monocytogenes_1639_v42 | 0.8574 |
| Listeria_seeligeri_serovar_1_2b_str_SLCC3954_683837      | Listeria_monocytogenes_1639_v42 | 0.8634 |
| Listeria_seeligeri_FSL_S4-171_702452                     | Listeria_monocytogenes_1639_v42 | 0.8108 |
| Listeria_seeligeri_FSL_N1-067_702453                     | Listeria_monocytogenes_1639_v42 | 0.8215 |
| Listeria_seeligeri_1640_v1                               | Listeria_monocytogenes_1639_v42 | 0.8601 |
| Listeria_seeligeri_1640                                  | Listeria_monocytogenes_1639_v42 | 0.8602 |
| Listeria_monocytogenes_WSLC1042_1457188                  | Listeria_monocytogenes_1639_v42 | 0.9135 |
| Listeria_monocytogenes_WSLC1001_1457187                  | Listeria_monocytogenes_1639_v42 | 0.9353 |
| Listeria_monocytogenes_SLCC7179_879090                   | Listeria_monocytogenes_1639_v42 | 0.9403 |
| Listeria_monocytogenes_SLCC5850_882096                   | Listeria_monocytogenes_1639_v42 | 0.9365 |
| Listeria_monocytogenes_SLCC2755_932919                   | Listeria_monocytogenes_1639_v42 | 0.9116 |
| Listeria_monocytogenes_SLCC2540_879089                   | Listeria_monocytogenes_1639_v42 | 0.9227 |
| Listeria_monocytogenes_SLCC2479_882020                   | Listeria_monocytogenes_1639_v42 | 0.935  |
| Listeria_monocytogenes_SLCC2378_879088                   | Listeria_monocytogenes_1639_v42 | 0.9145 |
| Listeria_monocytogenes_SLCC2376_882097                   | Listeria_monocytogenes_1639_v42 | 0.9179 |
| Listeria_monocytogenes_SLCC2372_932920                   | Listeria_monocytogenes_1639_v42 | 0.9286 |
| Listeria_monocytogenes_serotype_4b_str_LL195_1230340     | Listeria_monocytogenes_1639_v42 | 0.9181 |
| Listeria_monocytogenes_serotype_4b_str_LIS0087_1134669   | Listeria_monocytogenes_1639_v42 | 0.9179 |
| Listeria_monocytogenes_serotype_4b_str_F2365_265669      | Listeria_monocytogenes_1639_v42 | 0.9181 |
| Listeria_monocytogenes_serotype_4b_str_CLIP_80459_568819 | Listeria_monocytogenes_1639_v42 | 0.9218 |
| Listeria_monocytogenes_serotype_4b_str_81-0861_1196161   | Listeria_monocytogenes_1639_v42 | 0.9118 |
| Listeria_monocytogenes_serotype_4b_str_81-0592_1196160   | Listeria_monocytogenes_1639_v42 | 0.9128 |
| Listeria_monocytogenes_serotype_4b_str_81-0558_1196159   | Listeria_monocytogenes_1639_v42 | 0.9131 |
| Listeria_monocytogenes_serotype_4b_str_10-0809_1196162   | Listeria_monocytogenes_1639_v42 | 0.9128 |
| Listeria_monocytogenes_serotype_4b_str_02-6680_1196175   | Listeria_monocytogenes_1639_v42 | 0.9167 |
| Listeria_monocytogenes_serotype_4b_str_02-6679_1196174   | Listeria_monocytogenes_1639_v42 | 0.9167 |
| Listeria_monocytogenes_serotype_4b_str_02-1792_1196173   | Listeria_monocytogenes_1639_v42 | 0.9143 |
| Listeria_monocytogenes_serotype_4b_str_02-1289_1196172   | Listeria_monocytogenes_1639_v42 | 0.9143 |
| Listeria_monocytogenes_serotype_4b_str_02-1103_1196171   | Listeria_monocytogenes_1639_v42 | 0.9143 |
| Listeria_monocytogenes_serotype_3c_str_10-5027_1196195   | Listeria_monocytogenes_1639_v42 | 0.9372 |
| Listeria_monocytogenes_serotype_1_2c_str_10-5026_1196194 | Listeria_monocytogenes_1639_v42 | 0.9379 |
| Listeria_monocytogenes_serotype_1_2c_str_10-5025_1196193 | Listeria_monocytogenes_1639_v42 | 0.9379 |
| Listeria_monocytogenes_serotype_1_2b_str_10-0811_1196164 | Listeria_monocytogenes_1639_v42 | 0.9236 |
| Listeria_monocytogenes_serotype_1_2b_str_10-0810_1196163 | Listeria_monocytogenes_1639_v42 | 0.9236 |
| Listeria_monocytogenes_serotype_1_2a_str_99-6370_1196179 | Listeria_monocytogenes_1639_v42 | 0.9358 |
| Listeria_monocytogenes_serotype_1_2a_str_98-2035_1196178 | Listeria_monocytogenes_1639_v42 | 0.9358 |
| Listeria_monocytogenes_serotype_1_2a_str_95-0093_1196177 | Listeria_monocytogenes_1639_v42 | 0.9307 |
| Listeria_monocytogenes_serotype_1_2a_str_88-0478_1196176 | Listeria_monocytogenes_1639_v42 | 0.9303 |
| Listeria_monocytogenes_serotype_1_2a_str_10-5024_1196192 | Listeria_monocytogenes_1639_v42 | 0.9307 |
| Listeria_monocytogenes_serotype_1_2a_str_10-4758_1196168 | Listeria_monocytogenes_1639_v42 | 0.934  |
| Listeria_monocytogenes_serotype_1_2a_str_10-4754_1196167 | Listeria_monocytogenes_1639_v42 | 0.9343 |
| Listeria_monocytogenes_serotype_1_2a_str_10-1321_1196191 | Listeria_monocytogenes_1639_v42 | 0.9307 |
| Listeria_monocytogenes_serotype_1_2a_str_10-1047_1196190 | Listeria_monocytogenes_1639_v42 | 0.9306 |
| Listeria_monocytogenes_serotype_1_2a_str_10-1046_1196189 | Listeria_monocytogenes_1639_v42 | 0.9306 |
| Listeria_monocytogenes_serotype_1_2a_str_10-0934_1196170 | Listeria_monocytogenes_1639_v42 | 0.941  |
| Listeria_monocytogenes_serotype_1_2a_str_10-0933_1196169 | Listeria_monocytogenes_1639_v42 | 0.941  |
| Listeria_monocytogenes_serotype_1_2a_str_10-0815_1196188 | Listeria_monocytogenes_1639_v42 | 0.9346 |
| Listeria_monocytogenes_serotype_1_2a_str_10-0814_1196187 | Listeria_monocytogenes_1639_v42 | 0.9307 |
| Listeria_monocytogenes_serotype_1_2a_str_10-0813_1196166 | Listeria_monocytogenes_1639_v42 | 0.9359 |
| Listeria_monocytogenes_serotype_1_2a_str_10-0812_1196165 | Listeria_monocytogenes_1639_v42 | 0.9359 |
| Listeria_monocytogenes_serotype_1_2a_str_08-7669_1196186 | Listeria_monocytogenes_1639_v42 | 0.9362 |

|                                                          |                                 |        |
|----------------------------------------------------------|---------------------------------|--------|
| Listeria_monocytogenes_serotype_1_2a_str_08-7374_1196185 | Listeria_monocytogenes_1639_v42 | 0.9307 |
| Listeria_monocytogenes_serotype_1_2a_str_08-6997_1196184 | Listeria_monocytogenes_1639_v42 | 0.9346 |
| Listeria_monocytogenes_serotype_1_2a_str_08-6569_1196183 | Listeria_monocytogenes_1639_v42 | 0.9346 |
| Listeria_monocytogenes_serotype_1_2a_str_08-6056_1196182 | Listeria_monocytogenes_1639_v42 | 0.9346 |
| Listeria_monocytogenes_serotype_1_2a_str_04-5457_1196181 | Listeria_monocytogenes_1639_v42 | 0.9307 |
| Listeria_monocytogenes_serotype_1_2a_str_02-5993_1196180 | Listeria_monocytogenes_1639_v42 | 0.9307 |
| Listeria_monocytogenes_R479a_1437838                     | Listeria_monocytogenes_1639_v42 | 0.9296 |
| Listeria_monocytogenes_N53-1_1234142                     | Listeria_monocytogenes_1639_v42 | 0.8929 |
| Listeria_monocytogenes_M7_1030009                        | Listeria_monocytogenes_1639_v42 | 0.894  |
| Listeria_monocytogenes_LO28_393132                       | Listeria_monocytogenes_1639_v42 | 0.9311 |
| Listeria_monocytogenes_L99_563174                        | Listeria_monocytogenes_1639_v42 | 0.8943 |
| Listeria_monocytogenes_L312_882094                       | Listeria_monocytogenes_1639_v42 | 0.9214 |
| Listeria_monocytogenes_J1816_930781                      | Listeria_monocytogenes_1639_v42 | 0.9117 |
| Listeria_monocytogenes_J1-220_930782                     | Listeria_monocytogenes_1639_v42 | 0.9069 |
| Listeria_monocytogenes_J0161_393130                      | Listeria_monocytogenes_1639_v42 | 0.9468 |
| Listeria_monocytogenes_HCC23_552536                      | Listeria_monocytogenes_1639_v42 | 0.894  |
| Listeria_monocytogenes_FSL_R2-561_393126                 | Listeria_monocytogenes_1639_v42 | 0.9351 |
| Listeria_monocytogenes_FSL_J1-208_393119                 | Listeria_monocytogenes_1639_v42 | 0.8874 |
| Listeria_monocytogenes_FSL_J1-175_393118                 | Listeria_monocytogenes_1639_v42 | 0.9231 |
| Listeria_monocytogenes_Finland_1998_393127               | Listeria_monocytogenes_1639_v42 | 0.9399 |
| Listeria_monocytogenes_EGD-e_169963_v1                   | Listeria_monocytogenes_1639_v42 | 0.9407 |
| Listeria_monocytogenes_EGD-e_169963                      | Listeria_monocytogenes_1639_v42 | 0.9407 |
| Listeria_monocytogenes_EGD_1334565                       | Listeria_monocytogenes_1639_v42 | 0.9372 |
| Listeria_monocytogenes_CFSAN002349_1299895               | Listeria_monocytogenes_1639_v42 | 0.9179 |
| Listeria_monocytogenes_ATCC_19117_882095_v1              | Listeria_monocytogenes_1639_v42 | 0.9154 |
| Listeria_monocytogenes_ATCC_19117_882095                 | Listeria_monocytogenes_1639_v42 | 0.915  |
| Listeria_monocytogenes_6179_1288295                      | Listeria_monocytogenes_1639_v42 | 0.9306 |
| Listeria_monocytogenes_1639_v9                           | Listeria_monocytogenes_1639_v42 | 0.9069 |
| Listeria_monocytogenes_1639_v99                          | Listeria_monocytogenes_1639_v42 | 0.9117 |
| Listeria_monocytogenes_1639_v98                          | Listeria_monocytogenes_1639_v42 | 0.942  |
| Listeria_monocytogenes_1639_v97                          | Listeria_monocytogenes_1639_v42 | 0.918  |
| Listeria_monocytogenes_1639_v96                          | Listeria_monocytogenes_1639_v42 | 0.9122 |
| Listeria_monocytogenes_1639_v95                          | Listeria_monocytogenes_1639_v42 | 0.9122 |
| Listeria_monocytogenes_1639_v94                          | Listeria_monocytogenes_1639_v42 | 0.9129 |
| Listeria_monocytogenes_1639_v93                          | Listeria_monocytogenes_1639_v42 | 0.9226 |
| Listeria_monocytogenes_1639_v92                          | Listeria_monocytogenes_1639_v42 | 0.9118 |
| Listeria_monocytogenes_1639_v91                          | Listeria_monocytogenes_1639_v42 | 0.912  |
| Listeria_monocytogenes_1639_v90                          | Listeria_monocytogenes_1639_v42 | 0.942  |
| Listeria_monocytogenes_1639_v8                           | Listeria_monocytogenes_1639_v42 | 0.9225 |
| Listeria_monocytogenes_1639_v89                          | Listeria_monocytogenes_1639_v42 | 0.9132 |
| Listeria_monocytogenes_1639_v88                          | Listeria_monocytogenes_1639_v42 | 0.9385 |
| Listeria_monocytogenes_1639_v87                          | Listeria_monocytogenes_1639_v42 | 0.9325 |
| Listeria_monocytogenes_1639_v86                          | Listeria_monocytogenes_1639_v42 | 0.9325 |
| Listeria_monocytogenes_1639_v85                          | Listeria_monocytogenes_1639_v42 | 0.913  |
| Listeria_monocytogenes_1639_v84                          | Listeria_monocytogenes_1639_v42 | 0.9432 |
| Listeria_monocytogenes_1639_v83                          | Listeria_monocytogenes_1639_v42 | 0.9112 |
| Listeria_monocytogenes_1639_v82                          | Listeria_monocytogenes_1639_v42 | 0.9109 |
| Listeria_monocytogenes_1639_v81                          | Listeria_monocytogenes_1639_v42 | 0.9396 |
| Listeria_monocytogenes_1639_v80                          | Listeria_monocytogenes_1639_v42 | 0.9162 |
| Listeria_monocytogenes_1639_v7                           | Listeria_monocytogenes_1639_v42 | 0.9225 |
| Listeria_monocytogenes_1639_v79                          | Listeria_monocytogenes_1639_v42 | 0.9364 |
| Listeria_monocytogenes_1639_v78                          | Listeria_monocytogenes_1639_v42 | 0.9393 |
| Listeria_monocytogenes_1639_v77                          | Listeria_monocytogenes_1639_v42 | 0.9409 |
| Listeria_monocytogenes_1639_v76                          | Listeria_monocytogenes_1639_v42 | 0.9412 |
| Listeria_monocytogenes_1639_v75                          | Listeria_monocytogenes_1639_v42 | 0.8943 |
| Listeria_monocytogenes_1639_v74                          | Listeria_monocytogenes_1639_v42 | 0.9256 |
| Listeria_monocytogenes_1639_v73                          | Listeria_monocytogenes_1639_v42 | 0.9252 |
| Listeria_monocytogenes_1639_v72                          | Listeria_monocytogenes_1639_v42 | 0.9097 |
| Listeria_monocytogenes_1639_v71                          | Listeria_monocytogenes_1639_v42 | 0.9297 |
| Listeria_monocytogenes_1639_v70                          | Listeria_monocytogenes_1639_v42 | 0.9331 |
| Listeria_monocytogenes_1639_v6                           | Listeria_monocytogenes_1639_v42 | 0.9222 |
| Listeria_monocytogenes_1639_v69                          | Listeria_monocytogenes_1639_v42 | 0.9128 |
| Listeria_monocytogenes_1639_v68                          | Listeria_monocytogenes_1639_v42 | 0.9366 |
| Listeria_monocytogenes_1639_v67                          | Listeria_monocytogenes_1639_v42 | 0.9242 |
| Listeria_monocytogenes_1639_v66                          | Listeria_monocytogenes_1639_v42 | 0.9341 |
| Listeria_monocytogenes_1639_v65                          | Listeria_monocytogenes_1639_v42 | 0.9378 |
| Listeria_monocytogenes_1639_v64                          | Listeria_monocytogenes_1639_v42 | 0.9676 |
| Listeria_monocytogenes_1639_v63                          | Listeria_monocytogenes_1639_v42 | 0.9183 |
| Listeria_monocytogenes_1639_v62                          | Listeria_monocytogenes_1639_v42 | 0.9468 |
| Listeria_monocytogenes_1639_v61                          | Listeria_monocytogenes_1639_v42 | 0.9327 |
| Listeria_monocytogenes_1639_v60                          | Listeria_monocytogenes_1639_v42 | 0.9492 |
| Listeria_monocytogenes_1639_v5                           | Listeria_monocytogenes_1639_v42 | 0.8897 |
| Listeria_monocytogenes_1639_v59                          | Listeria_monocytogenes_1639_v42 | 0.9119 |
| Listeria_monocytogenes_1639_v58                          | Listeria_monocytogenes_1639_v42 | 0.9145 |
| Listeria_monocytogenes_1639_v57                          | Listeria_monocytogenes_1639_v42 | 0.907  |
| Listeria_monocytogenes_1639_v56                          | Listeria_monocytogenes_1639_v42 | 0.9185 |
| Listeria_monocytogenes_1639_v55                          | Listeria_monocytogenes_1639_v42 | 0.9059 |
| Listeria_monocytogenes_1639_v54                          | Listeria_monocytogenes_1639_v42 | 0.9121 |
| Listeria_monocytogenes_1639_v53                          | Listeria_monocytogenes_1639_v42 | 0.9727 |
| Listeria_monocytogenes_1639_v52                          | Listeria_monocytogenes_1639_v42 | 0.9122 |
| Listeria_monocytogenes_1639_v51                          | Listeria_monocytogenes_1639_v42 | 0.9091 |
| Listeria_monocytogenes_1639_v50                          | Listeria_monocytogenes_1639_v42 | 0.9292 |
| Listeria_monocytogenes_1639_v4                           | Listeria_monocytogenes_1639_v42 | 0.901  |
| Listeria_monocytogenes_1639_v49                          | Listeria_monocytogenes_1639_v42 | 0.9088 |
| Listeria_monocytogenes_1639_v48                          | Listeria_monocytogenes_1639_v42 | 0.9416 |
| Listeria_monocytogenes_1639_v47                          | Listeria_monocytogenes_1639_v42 | 0.93   |
| Listeria_monocytogenes_1639_v46                          | Listeria_monocytogenes_1639_v42 | 0.94   |
| Listeria_monocytogenes_1639_v45                          | Listeria_monocytogenes_1639_v42 | 0.9224 |
| Listeria_monocytogenes_1639_v44                          | Listeria_monocytogenes_1639_v42 | 0.9307 |
| Listeria_monocytogenes_1639_v43                          | Listeria_monocytogenes_1639_v42 | 0.9307 |
| Listeria_monocytogenes_1639_v42                          | Listeria_monocytogenes_1639_v42 | 0.0686 |

|                                                          |                                 |        |
|----------------------------------------------------------|---------------------------------|--------|
| Listeria_welshimeri_1643                                 | Listeria_monocytogenes_1639_v43 | 0.8644 |
| Listeria_welshimeri_serovar_6b_str_SLCC5334_386043       | Listeria_monocytogenes_1639_v43 | 0.8638 |
| Listeria_seeligeri_serovar_1_2b_str_SLCC3954_683837      | Listeria_monocytogenes_1639_v43 | 0.8702 |
| Listeria_seeligeri_FSL_S4-171_702452                     | Listeria_monocytogenes_1639_v43 | 0.8108 |
| Listeria_seeligeri_FSL_N1-067_702453                     | Listeria_monocytogenes_1639_v43 | 0.8321 |
| Listeria_seeligeri_1640_v1                               | Listeria_monocytogenes_1639_v43 | 0.8676 |
| Listeria_seeligeri_1640                                  | Listeria_monocytogenes_1639_v43 | 0.8653 |
| Listeria_monocytogenes_WSLC1042_1457188                  | Listeria_monocytogenes_1639_v43 | 0.9164 |
| Listeria_monocytogenes_WSLC1001_1457187                  | Listeria_monocytogenes_1639_v43 | 0.952  |
| Listeria_monocytogenes_SLCC7179_879090                   | Listeria_monocytogenes_1639_v43 | 0.9486 |
| Listeria_monocytogenes_SLCC5850_882096                   | Listeria_monocytogenes_1639_v43 | 0.9522 |
| Listeria_monocytogenes_SLCC2755_932919                   | Listeria_monocytogenes_1639_v43 | 0.9177 |
| Listeria_monocytogenes_SLCC2540_879089                   | Listeria_monocytogenes_1639_v43 | 0.9349 |
| Listeria_monocytogenes_SLCC2479_882020                   | Listeria_monocytogenes_1639_v43 | 0.9509 |
| Listeria_monocytogenes_SLCC2378_879088                   | Listeria_monocytogenes_1639_v43 | 0.9178 |
| Listeria_monocytogenes_SLCC2376_882097                   | Listeria_monocytogenes_1639_v43 | 0.9216 |
| Listeria_monocytogenes_SLCC2372_932920                   | Listeria_monocytogenes_1639_v43 | 0.9439 |
| Listeria_monocytogenes_serotype_4b_str_LL195_1230340     | Listeria_monocytogenes_1639_v43 | 0.9229 |
| Listeria_monocytogenes_serotype_4b_str_LIS0087_1134669   | Listeria_monocytogenes_1639_v43 | 0.9337 |
| Listeria_monocytogenes_serotype_4b_str_F2365_265669      | Listeria_monocytogenes_1639_v43 | 0.9229 |
| Listeria_monocytogenes_serotype_4b_str_CLIP_80459_568819 | Listeria_monocytogenes_1639_v43 | 0.9296 |
| Listeria_monocytogenes_serotype_4b_str_81-0861_1196161   | Listeria_monocytogenes_1639_v43 | 0.9135 |
| Listeria_monocytogenes_serotype_4b_str_81-0592_1196160   | Listeria_monocytogenes_1639_v43 | 0.9145 |
| Listeria_monocytogenes_serotype_4b_str_81-0558_1196159   | Listeria_monocytogenes_1639_v43 | 0.9152 |
| Listeria_monocytogenes_serotype_4b_str_10-0809_1196162   | Listeria_monocytogenes_1639_v43 | 0.9145 |
| Listeria_monocytogenes_serotype_4b_str_02-6680_1196175   | Listeria_monocytogenes_1639_v43 | 0.9263 |
| Listeria_monocytogenes_serotype_4b_str_02-6679_1196174   | Listeria_monocytogenes_1639_v43 | 0.9263 |
| Listeria_monocytogenes_serotype_4b_str_02-1792_1196173   | Listeria_monocytogenes_1639_v43 | 0.9164 |
| Listeria_monocytogenes_serotype_4b_str_02-1289_1196172   | Listeria_monocytogenes_1639_v43 | 0.9164 |
| Listeria_monocytogenes_serotype_4b_str_02-1103_1196171   | Listeria_monocytogenes_1639_v43 | 0.9164 |
| Listeria_monocytogenes_serotype_3c_str_10-5027_1196195   | Listeria_monocytogenes_1639_v43 | 0.9538 |
| Listeria_monocytogenes_serotype_1_2c_str_10-5026_1196194 | Listeria_monocytogenes_1639_v43 | 0.9546 |
| Listeria_monocytogenes_serotype_1_2c_str_10-5025_1196193 | Listeria_monocytogenes_1639_v43 | 0.9546 |
| Listeria_monocytogenes_serotype_1_2b_str_10-0811_1196164 | Listeria_monocytogenes_1639_v43 | 0.9345 |
| Listeria_monocytogenes_serotype_1_2b_str_10-0810_1196163 | Listeria_monocytogenes_1639_v43 | 0.9345 |
| Listeria_monocytogenes_serotype_1_2a_str_99-6370_1196179 | Listeria_monocytogenes_1639_v43 | 0.9934 |
| Listeria_monocytogenes_serotype_1_2a_str_98-2035_1196178 | Listeria_monocytogenes_1639_v43 | 0.9934 |
| Listeria_monocytogenes_serotype_1_2a_str_95-0093_1196177 | Listeria_monocytogenes_1639_v43 | 0.9982 |
| Listeria_monocytogenes_serotype_1_2a_str_88-0478_1196176 | Listeria_monocytogenes_1639_v43 | 0.9941 |
| Listeria_monocytogenes_serotype_1_2a_str_10-5024_1196192 | Listeria_monocytogenes_1639_v43 | 1      |
| Listeria_monocytogenes_serotype_1_2a_str_10-4758_1196168 | Listeria_monocytogenes_1639_v43 | 0.9504 |
| Listeria_monocytogenes_serotype_1_2a_str_10-4754_1196167 | Listeria_monocytogenes_1639_v43 | 0.9504 |
| Listeria_monocytogenes_serotype_1_2a_str_10-1321_1196191 | Listeria_monocytogenes_1639_v43 | 1      |
| Listeria_monocytogenes_serotype_1_2a_str_10-1047_1196190 | Listeria_monocytogenes_1639_v43 | 0.9967 |
| Listeria_monocytogenes_serotype_1_2a_str_10-1046_1196189 | Listeria_monocytogenes_1639_v43 | 0.9967 |
| Listeria_monocytogenes_serotype_1_2a_str_10-0934_1196170 | Listeria_monocytogenes_1639_v43 | 0.9494 |
| Listeria_monocytogenes_serotype_1_2a_str_10-0933_1196169 | Listeria_monocytogenes_1639_v43 | 0.9494 |
| Listeria_monocytogenes_serotype_1_2a_str_10-0815_1196188 | Listeria_monocytogenes_1639_v43 | 0.9949 |
| Listeria_monocytogenes_serotype_1_2a_str_10-0814_1196187 | Listeria_monocytogenes_1639_v43 | 0.9996 |
| Listeria_monocytogenes_serotype_1_2a_str_10-0813_1196166 | Listeria_monocytogenes_1639_v43 | 0.954  |
| Listeria_monocytogenes_serotype_1_2a_str_10-0812_1196165 | Listeria_monocytogenes_1639_v43 | 0.954  |
| Listeria_monocytogenes_serotype_1_2a_str_08-7669_1196186 | Listeria_monocytogenes_1639_v43 | 0.9896 |
| Listeria_monocytogenes_serotype_1_2a_str_08-7374_1196185 | Listeria_monocytogenes_1639_v43 | 1      |
| Listeria_monocytogenes_serotype_1_2a_str_08-6997_1196184 | Listeria_monocytogenes_1639_v43 | 0.9949 |
| Listeria_monocytogenes_serotype_1_2a_str_08-6569_1196183 | Listeria_monocytogenes_1639_v43 | 0.9949 |
| Listeria_monocytogenes_serotype_1_2a_str_08-6056_1196182 | Listeria_monocytogenes_1639_v43 | 0.9949 |
| Listeria_monocytogenes_serotype_1_2a_str_04-5457_1196181 | Listeria_monocytogenes_1639_v43 | 1      |
| Listeria_monocytogenes_serotype_1_2a_str_02-5993_1196180 | Listeria_monocytogenes_1639_v43 | 0.9996 |
| Listeria_monocytogenes_R479a_1437838                     | Listeria_monocytogenes_1639_v43 | 0.9677 |
| Listeria_monocytogenes_N53-1_1234142                     | Listeria_monocytogenes_1639_v43 | 0.8937 |
| Listeria_monocytogenes_M7_1030009                        | Listeria_monocytogenes_1639_v43 | 0.8993 |
| Listeria_monocytogenes_LO28_393132                       | Listeria_monocytogenes_1639_v43 | 0.944  |
| Listeria_monocytogenes_L99_563174                        | Listeria_monocytogenes_1639_v43 | 0.8999 |
| Listeria_monocytogenes_L312_882094                       | Listeria_monocytogenes_1639_v43 | 0.9296 |
| Listeria_monocytogenes_J1816_930781                      | Listeria_monocytogenes_1639_v43 | 0.92   |
| Listeria_monocytogenes_J1-220_930782                     | Listeria_monocytogenes_1639_v43 | 0.9196 |
| Listeria_monocytogenes_J0161_393130                      | Listeria_monocytogenes_1639_v43 | 0.9428 |
| Listeria_monocytogenes_HCC23_552536                      | Listeria_monocytogenes_1639_v43 | 0.8992 |
| Listeria_monocytogenes_FSL_R2-561_393126                 | Listeria_monocytogenes_1639_v43 | 0.9513 |
| Listeria_monocytogenes_FSL_J1-208_393119                 | Listeria_monocytogenes_1639_v43 | 0.8886 |
| Listeria_monocytogenes_FSL_J1-175_393118                 | Listeria_monocytogenes_1639_v43 | 0.9328 |
| Listeria_monocytogenes_Finland_1998_393127               | Listeria_monocytogenes_1639_v43 | 0.9497 |
| Listeria_monocytogenes_EGD-e_169963_v1                   | Listeria_monocytogenes_1639_v43 | 0.9434 |
| Listeria_monocytogenes_EGD-e_169963                      | Listeria_monocytogenes_1639_v43 | 0.9434 |
| Listeria_monocytogenes_EGD_1334565                       | Listeria_monocytogenes_1639_v43 | 0.9529 |
| Listeria_monocytogenes_CFSAN002349_1299895               | Listeria_monocytogenes_1639_v43 | 0.9264 |
| Listeria_monocytogenes_ATCC_19117_882095_v1              | Listeria_monocytogenes_1639_v43 | 0.9213 |
| Listeria_monocytogenes_ATCC_19117_882095                 | Listeria_monocytogenes_1639_v43 | 0.9213 |
| Listeria_monocytogenes_6179_1288295                      | Listeria_monocytogenes_1639_v43 | 0.9425 |
| Listeria_monocytogenes_1639_v9                           | Listeria_monocytogenes_1639_v43 | 0.9227 |
| Listeria_monocytogenes_1639_v99                          | Listeria_monocytogenes_1639_v43 | 0.9211 |
| Listeria_monocytogenes_1639_v98                          | Listeria_monocytogenes_1639_v43 | 0.9409 |
| Listeria_monocytogenes_1639_v97                          | Listeria_monocytogenes_1639_v43 | 0.9246 |
| Listeria_monocytogenes_1639_v96                          | Listeria_monocytogenes_1639_v43 | 0.9197 |
| Listeria_monocytogenes_1639_v95                          | Listeria_monocytogenes_1639_v43 | 0.9198 |
| Listeria_monocytogenes_1639_v94                          | Listeria_monocytogenes_1639_v43 | 0.9201 |
| Listeria_monocytogenes_1639_v93                          | Listeria_monocytogenes_1639_v43 | 0.9361 |
| Listeria_monocytogenes_1639_v92                          | Listeria_monocytogenes_1639_v43 | 0.9215 |
| Listeria_monocytogenes_1639_v91                          | Listeria_monocytogenes_1639_v43 | 0.9218 |
| Listeria_monocytogenes_1639_v90                          | Listeria_monocytogenes_1639_v43 | 0.9409 |
| Listeria_monocytogenes_1639_v8                           | Listeria_monocytogenes_1639_v43 | 0.9572 |



|                                                          |                                 |        |
|----------------------------------------------------------|---------------------------------|--------|
| Listeria_monocytogenes_1639_v89                          | Listeria_monocytogenes_1639_v43 | 0.9277 |
| Listeria_monocytogenes_1639_v88                          | Listeria_monocytogenes_1639_v43 | 0.9563 |
| Listeria_monocytogenes_1639_v87                          | Listeria_monocytogenes_1639_v43 | 0.9491 |
| Listeria_monocytogenes_1639_v86                          | Listeria_monocytogenes_1639_v43 | 0.9484 |
| Listeria_monocytogenes_1639_v85                          | Listeria_monocytogenes_1639_v43 | 0.914  |
| Listeria_monocytogenes_1639_v84                          | Listeria_monocytogenes_1639_v43 | 0.9569 |
| Listeria_monocytogenes_1639_v83                          | Listeria_monocytogenes_1639_v43 | 0.9159 |
| Listeria_monocytogenes_1639_v82                          | Listeria_monocytogenes_1639_v43 | 0.9156 |
| Listeria_monocytogenes_1639_v81                          | Listeria_monocytogenes_1639_v43 | 0.9607 |
| Listeria_monocytogenes_1639_v80                          | Listeria_monocytogenes_1639_v43 | 0.9354 |
| Listeria_monocytogenes_1639_v7                           | Listeria_monocytogenes_1639_v43 | 0.9572 |
| Listeria_monocytogenes_1639_v79                          | Listeria_monocytogenes_1639_v43 | 0.9571 |
| Listeria_monocytogenes_1639_v78                          | Listeria_monocytogenes_1639_v43 | 0.9615 |
| Listeria_monocytogenes_1639_v77                          | Listeria_monocytogenes_1639_v43 | 0.9473 |
| Listeria_monocytogenes_1639_v76                          | Listeria_monocytogenes_1639_v43 | 0.9453 |
| Listeria_monocytogenes_1639_v75                          | Listeria_monocytogenes_1639_v43 | 0.8999 |
| Listeria_monocytogenes_1639_v74                          | Listeria_monocytogenes_1639_v43 | 0.9355 |
| Listeria_monocytogenes_1639_v73                          | Listeria_monocytogenes_1639_v43 | 0.942  |
| Listeria_monocytogenes_1639_v72                          | Listeria_monocytogenes_1639_v43 | 0.9169 |
| Listeria_monocytogenes_1639_v71                          | Listeria_monocytogenes_1639_v43 | 0.937  |
| Listeria_monocytogenes_1639_v70                          | Listeria_monocytogenes_1639_v43 | 0.9518 |
| Listeria_monocytogenes_1639_v6                           | Listeria_monocytogenes_1639_v43 | 0.9565 |
| Listeria_monocytogenes_1639_v69                          | Listeria_monocytogenes_1639_v43 | 0.9149 |
| Listeria_monocytogenes_1639_v68                          | Listeria_monocytogenes_1639_v43 | 0.9355 |
| Listeria_monocytogenes_1639_v67                          | Listeria_monocytogenes_1639_v43 | 0.9356 |
| Listeria_monocytogenes_1639_v66                          | Listeria_monocytogenes_1639_v43 | 0.9493 |
| Listeria_monocytogenes_1639_v65                          | Listeria_monocytogenes_1639_v43 | 0.9672 |
| Listeria_monocytogenes_1639_v64                          | Listeria_monocytogenes_1639_v43 | 0.9449 |
| Listeria_monocytogenes_1639_v63                          | Listeria_monocytogenes_1639_v43 | 0.937  |
| Listeria_monocytogenes_1639_v62                          | Listeria_monocytogenes_1639_v43 | 0.9561 |
| Listeria_monocytogenes_1639_v61                          | Listeria_monocytogenes_1639_v43 | 0.9772 |
| Listeria_monocytogenes_1639_v60                          | Listeria_monocytogenes_1639_v43 | 0.9437 |
| Listeria_monocytogenes_1639_v5                           | Listeria_monocytogenes_1639_v43 | 0.8916 |
| Listeria_monocytogenes_1639_v59                          | Listeria_monocytogenes_1639_v43 | 0.9218 |
| Listeria_monocytogenes_1639_v58                          | Listeria_monocytogenes_1639_v43 | 0.917  |
| Listeria_monocytogenes_1639_v57                          | Listeria_monocytogenes_1639_v43 | 0.9175 |
| Listeria_monocytogenes_1639_v56                          | Listeria_monocytogenes_1639_v43 | 0.9229 |
| Listeria_monocytogenes_1639_v55                          | Listeria_monocytogenes_1639_v43 | 0.9149 |
| Listeria_monocytogenes_1639_v54                          | Listeria_monocytogenes_1639_v43 | 0.9168 |
| Listeria_monocytogenes_1639_v53                          | Listeria_monocytogenes_1639_v43 | 0.9326 |
| Listeria_monocytogenes_1639_v52                          | Listeria_monocytogenes_1639_v43 | 0.9235 |
| Listeria_monocytogenes_1639_v51                          | Listeria_monocytogenes_1639_v43 | 0.9145 |
| Listeria_monocytogenes_1639_v50                          | Listeria_monocytogenes_1639_v43 | 0.9985 |
| Listeria_monocytogenes_1639_v4                           | Listeria_monocytogenes_1639_v43 | 0.9022 |
| Listeria_monocytogenes_1639_v49                          | Listeria_monocytogenes_1639_v43 | 0.9124 |
| Listeria_monocytogenes_1639_v48                          | Listeria_monocytogenes_1639_v43 | 0.9504 |
| Listeria_monocytogenes_1639_v47                          | Listeria_monocytogenes_1639_v43 | 0.9952 |
| Listeria_monocytogenes_1639_v46                          | Listeria_monocytogenes_1639_v43 | 0.9393 |
| Listeria_monocytogenes_1639_v45                          | Listeria_monocytogenes_1639_v43 | 0.9895 |
| Listeria_monocytogenes_1639_v44                          | Listeria_monocytogenes_1639_v43 | 1      |
| Listeria_monocytogenes_1639_v43                          | Listeria_monocytogenes_1639_v43 | 0.0664 |
| Listeria_welshimeri_1643                                 | Listeria_monocytogenes_1639_v44 | 0.8644 |
| Listeria_welshimeri_serovar_6b_str_SLCC5334_386043       | Listeria_monocytogenes_1639_v44 | 0.8638 |
| Listeria_seeligeri_serovar_1_2b_str_SLCC3954_683837      | Listeria_monocytogenes_1639_v44 | 0.8702 |
| Listeria_seeligeri_FSL_S4-171_702452                     | Listeria_monocytogenes_1639_v44 | 0.8108 |
| Listeria_seeligeri_FSL_N1-067_702453                     | Listeria_monocytogenes_1639_v44 | 0.8321 |
| Listeria_seeligeri_1640_v1                               | Listeria_monocytogenes_1639_v44 | 0.8676 |
| Listeria_seeligeri_1640                                  | Listeria_monocytogenes_1639_v44 | 0.8653 |
| Listeria_monocytogenes_WSLC1042_1457188                  | Listeria_monocytogenes_1639_v44 | 0.9164 |
| Listeria_monocytogenes_WSLC1001_1457187                  | Listeria_monocytogenes_1639_v44 | 0.952  |
| Listeria_monocytogenes_SLCC7179_879090                   | Listeria_monocytogenes_1639_v44 | 0.9486 |
| Listeria_monocytogenes_SLCC5850_882096                   | Listeria_monocytogenes_1639_v44 | 0.9522 |
| Listeria_monocytogenes_SLCC2755_932919                   | Listeria_monocytogenes_1639_v44 | 0.9177 |
| Listeria_monocytogenes_SLCC2540_879089                   | Listeria_monocytogenes_1639_v44 | 0.9349 |
| Listeria_monocytogenes_SLCC2479_882020                   | Listeria_monocytogenes_1639_v44 | 0.9509 |
| Listeria_monocytogenes_SLCC2378_879088                   | Listeria_monocytogenes_1639_v44 | 0.9178 |
| Listeria_monocytogenes_SLCC2376_882097                   | Listeria_monocytogenes_1639_v44 | 0.9216 |
| Listeria_monocytogenes_SLCC2372_932920                   | Listeria_monocytogenes_1639_v44 | 0.9439 |
| Listeria_monocytogenes_serotype_4b_str_LL195_1230340     | Listeria_monocytogenes_1639_v44 | 0.9229 |
| Listeria_monocytogenes_serotype_4b_str_LIS0087_1134669   | Listeria_monocytogenes_1639_v44 | 0.9337 |
| Listeria_monocytogenes_serotype_4b_str_F2365_265669      | Listeria_monocytogenes_1639_v44 | 0.9229 |
| Listeria_monocytogenes_serotype_4b_str_CLIP_80459_568819 | Listeria_monocytogenes_1639_v44 | 0.9296 |
| Listeria_monocytogenes_serotype_4b_str_81-0861_1196161   | Listeria_monocytogenes_1639_v44 | 0.9135 |
| Listeria_monocytogenes_serotype_4b_str_81-0592_1196160   | Listeria_monocytogenes_1639_v44 | 0.9145 |
| Listeria_monocytogenes_serotype_4b_str_81-0558_1196159   | Listeria_monocytogenes_1639_v44 | 0.9152 |
| Listeria_monocytogenes_serotype_4b_str_10-0809_1196162   | Listeria_monocytogenes_1639_v44 | 0.9145 |
| Listeria_monocytogenes_serotype_4b_str_02-6680_1196175   | Listeria_monocytogenes_1639_v44 | 0.9263 |
| Listeria_monocytogenes_serotype_4b_str_02-6679_1196174   | Listeria_monocytogenes_1639_v44 | 0.9263 |
| Listeria_monocytogenes_serotype_4b_str_02-1792_1196173   | Listeria_monocytogenes_1639_v44 | 0.9164 |
| Listeria_monocytogenes_serotype_4b_str_02-1289_1196172   | Listeria_monocytogenes_1639_v44 | 0.9164 |
| Listeria_monocytogenes_serotype_4b_str_02-1103_1196171   | Listeria_monocytogenes_1639_v44 | 0.9164 |
| Listeria_monocytogenes_serotype_3c_str_10-5027_1196195   | Listeria_monocytogenes_1639_v44 | 0.9538 |
| Listeria_monocytogenes_serotype_1_2c_str_10-5026_1196194 | Listeria_monocytogenes_1639_v44 | 0.9546 |
| Listeria_monocytogenes_serotype_1_2c_str_10-5025_1196193 | Listeria_monocytogenes_1639_v44 | 0.9546 |
| Listeria_monocytogenes_serotype_1_2b_str_10-0811_1196164 | Listeria_monocytogenes_1639_v44 | 0.9345 |
| Listeria_monocytogenes_serotype_1_2b_str_10-0810_1196163 | Listeria_monocytogenes_1639_v44 | 0.9345 |
| Listeria_monocytogenes_serotype_1_2a_str_99-6370_1196179 | Listeria_monocytogenes_1639_v44 | 0.9934 |
| Listeria_monocytogenes_serotype_1_2a_str_98-2035_1196178 | Listeria_monocytogenes_1639_v44 | 0.9934 |
| Listeria_monocytogenes_serotype_1_2a_str_95-0093_1196177 | Listeria_monocytogenes_1639_v44 | 0.9982 |
| Listeria_monocytogenes_serotype_1_2a_str_88-0478_1196176 | Listeria_monocytogenes_1639_v44 | 0.9941 |
| Listeria_monocytogenes_serotype_1_2a_str_10-5024_1196192 | Listeria_monocytogenes_1639_v44 | 1      |

|                                                          |                                 |        |
|----------------------------------------------------------|---------------------------------|--------|
| Listeria_monocytogenes_serotype_1_2a_str_10-4758_1196168 | Listeria_monocytogenes_1639_v44 | 0.9504 |
| Listeria_monocytogenes_serotype_1_2a_str_10-4754_1196167 | Listeria_monocytogenes_1639_v44 | 0.9504 |
| Listeria_monocytogenes_serotype_1_2a_str_10-1321_1196191 | Listeria_monocytogenes_1639_v44 | 1      |
| Listeria_monocytogenes_serotype_1_2a_str_10-1047_1196190 | Listeria_monocytogenes_1639_v44 | 0.9967 |
| Listeria_monocytogenes_serotype_1_2a_str_10-1046_1196189 | Listeria_monocytogenes_1639_v44 | 0.9967 |
| Listeria_monocytogenes_serotype_1_2a_str_10-0934_1196170 | Listeria_monocytogenes_1639_v44 | 0.9494 |
| Listeria_monocytogenes_serotype_1_2a_str_10-0933_1196169 | Listeria_monocytogenes_1639_v44 | 0.9494 |
| Listeria_monocytogenes_serotype_1_2a_str_10-0815_1196188 | Listeria_monocytogenes_1639_v44 | 0.9949 |
| Listeria_monocytogenes_serotype_1_2a_str_10-0814_1196187 | Listeria_monocytogenes_1639_v44 | 0.9996 |
| Listeria_monocytogenes_serotype_1_2a_str_10-0813_1196166 | Listeria_monocytogenes_1639_v44 | 0.954  |
| Listeria_monocytogenes_serotype_1_2a_str_10-0812_1196165 | Listeria_monocytogenes_1639_v44 | 0.954  |
| Listeria_monocytogenes_serotype_1_2a_str_08-7669_1196186 | Listeria_monocytogenes_1639_v44 | 0.9896 |
| Listeria_monocytogenes_serotype_1_2a_str_08-7374_1196185 | Listeria_monocytogenes_1639_v44 | 1      |
| Listeria_monocytogenes_serotype_1_2a_str_08-6997_1196184 | Listeria_monocytogenes_1639_v44 | 0.9949 |
| Listeria_monocytogenes_serotype_1_2a_str_08-6569_1196183 | Listeria_monocytogenes_1639_v44 | 0.9949 |
| Listeria_monocytogenes_serotype_1_2a_str_08-6056_1196182 | Listeria_monocytogenes_1639_v44 | 0.9949 |
| Listeria_monocytogenes_serotype_1_2a_str_04-5457_1196181 | Listeria_monocytogenes_1639_v44 | 1      |
| Listeria_monocytogenes_serotype_1_2a_str_02-5993_1196180 | Listeria_monocytogenes_1639_v44 | 0.9996 |
| Listeria_monocytogenes_R479a_1437838                     | Listeria_monocytogenes_1639_v44 | 0.9677 |
| Listeria_monocytogenes_N53-1_1234142                     | Listeria_monocytogenes_1639_v44 | 0.8937 |
| Listeria_monocytogenes_M7_1030009                        | Listeria_monocytogenes_1639_v44 | 0.8993 |
| Listeria_monocytogenes_LO28_393132                       | Listeria_monocytogenes_1639_v44 | 0.944  |
| Listeria_monocytogenes_L99_563174                        | Listeria_monocytogenes_1639_v44 | 0.8999 |
| Listeria_monocytogenes_L312_882094                       | Listeria_monocytogenes_1639_v44 | 0.9296 |
| Listeria_monocytogenes_J1816_930781                      | Listeria_monocytogenes_1639_v44 | 0.92   |
| Listeria_monocytogenes_J1-220_930782                     | Listeria_monocytogenes_1639_v44 | 0.9196 |
| Listeria_monocytogenes_J0161_393130                      | Listeria_monocytogenes_1639_v44 | 0.9428 |
| Listeria_monocytogenes_HCC23_552536                      | Listeria_monocytogenes_1639_v44 | 0.8992 |
| Listeria_monocytogenes_FSL_R2-561_393126                 | Listeria_monocytogenes_1639_v44 | 0.9513 |
| Listeria_monocytogenes_FSL_J1-208_393119                 | Listeria_monocytogenes_1639_v44 | 0.8886 |
| Listeria_monocytogenes_FSL_J1-175_393118                 | Listeria_monocytogenes_1639_v44 | 0.9328 |
| Listeria_monocytogenes_Finland_1998_393127               | Listeria_monocytogenes_1639_v44 | 0.9497 |
| Listeria_monocytogenes_EGD-e_169963_v1                   | Listeria_monocytogenes_1639_v44 | 0.9434 |
| Listeria_monocytogenes_EGD-e_169963                      | Listeria_monocytogenes_1639_v44 | 0.9434 |
| Listeria_monocytogenes_EGD_1334565                       | Listeria_monocytogenes_1639_v44 | 0.9529 |
| Listeria_monocytogenes_CFSAN002349_1299895               | Listeria_monocytogenes_1639_v44 | 0.9264 |
| Listeria_monocytogenes_ATCC_19117_882095_v1              | Listeria_monocytogenes_1639_v44 | 0.9213 |
| Listeria_monocytogenes_ATCC_19117_882095                 | Listeria_monocytogenes_1639_v44 | 0.9213 |
| Listeria_monocytogenes_6179_1288295                      | Listeria_monocytogenes_1639_v44 | 0.9425 |
| Listeria_monocytogenes_1639_v9                           | Listeria_monocytogenes_1639_v44 | 0.9227 |
| Listeria_monocytogenes_1639_v99                          | Listeria_monocytogenes_1639_v44 | 0.9211 |
| Listeria_monocytogenes_1639_v98                          | Listeria_monocytogenes_1639_v44 | 0.9409 |
| Listeria_monocytogenes_1639_v97                          | Listeria_monocytogenes_1639_v44 | 0.9246 |
| Listeria_monocytogenes_1639_v96                          | Listeria_monocytogenes_1639_v44 | 0.9197 |
| Listeria_monocytogenes_1639_v95                          | Listeria_monocytogenes_1639_v44 | 0.9198 |
| Listeria_monocytogenes_1639_v94                          | Listeria_monocytogenes_1639_v44 | 0.9201 |
| Listeria_monocytogenes_1639_v93                          | Listeria_monocytogenes_1639_v44 | 0.9361 |
| Listeria_monocytogenes_1639_v92                          | Listeria_monocytogenes_1639_v44 | 0.9215 |
| Listeria_monocytogenes_1639_v91                          | Listeria_monocytogenes_1639_v44 | 0.9218 |
| Listeria_monocytogenes_1639_v90                          | Listeria_monocytogenes_1639_v44 | 0.9409 |
| Listeria_monocytogenes_1639_v8                           | Listeria_monocytogenes_1639_v44 | 0.9572 |
| Listeria_monocytogenes_1639_v89                          | Listeria_monocytogenes_1639_v44 | 0.9277 |
| Listeria_monocytogenes_1639_v88                          | Listeria_monocytogenes_1639_v44 | 0.9563 |
| Listeria_monocytogenes_1639_v87                          | Listeria_monocytogenes_1639_v44 | 0.9491 |
| Listeria_monocytogenes_1639_v86                          | Listeria_monocytogenes_1639_v44 | 0.9484 |
| Listeria_monocytogenes_1639_v85                          | Listeria_monocytogenes_1639_v44 | 0.914  |
| Listeria_monocytogenes_1639_v84                          | Listeria_monocytogenes_1639_v44 | 0.9569 |
| Listeria_monocytogenes_1639_v83                          | Listeria_monocytogenes_1639_v44 | 0.9159 |
| Listeria_monocytogenes_1639_v82                          | Listeria_monocytogenes_1639_v44 | 0.9156 |
| Listeria_monocytogenes_1639_v81                          | Listeria_monocytogenes_1639_v44 | 0.9607 |
| Listeria_monocytogenes_1639_v80                          | Listeria_monocytogenes_1639_v44 | 0.9354 |
| Listeria_monocytogenes_1639_v7                           | Listeria_monocytogenes_1639_v44 | 0.9572 |
| Listeria_monocytogenes_1639_v79                          | Listeria_monocytogenes_1639_v44 | 0.9571 |
| Listeria_monocytogenes_1639_v78                          | Listeria_monocytogenes_1639_v44 | 0.9615 |
| Listeria_monocytogenes_1639_v77                          | Listeria_monocytogenes_1639_v44 | 0.9473 |
| Listeria_monocytogenes_1639_v76                          | Listeria_monocytogenes_1639_v44 | 0.9453 |
| Listeria_monocytogenes_1639_v75                          | Listeria_monocytogenes_1639_v44 | 0.8999 |
| Listeria_monocytogenes_1639_v74                          | Listeria_monocytogenes_1639_v44 | 0.9355 |
| Listeria_monocytogenes_1639_v73                          | Listeria_monocytogenes_1639_v44 | 0.942  |
| Listeria_monocytogenes_1639_v72                          | Listeria_monocytogenes_1639_v44 | 0.9169 |
| Listeria_monocytogenes_1639_v71                          | Listeria_monocytogenes_1639_v44 | 0.937  |
| Listeria_monocytogenes_1639_v70                          | Listeria_monocytogenes_1639_v44 | 0.9518 |
| Listeria_monocytogenes_1639_v6                           | Listeria_monocytogenes_1639_v44 | 0.9565 |
| Listeria_monocytogenes_1639_v69                          | Listeria_monocytogenes_1639_v44 | 0.9149 |
| Listeria_monocytogenes_1639_v68                          | Listeria_monocytogenes_1639_v44 | 0.9355 |
| Listeria_monocytogenes_1639_v67                          | Listeria_monocytogenes_1639_v44 | 0.9356 |
| Listeria_monocytogenes_1639_v66                          | Listeria_monocytogenes_1639_v44 | 0.9493 |
| Listeria_monocytogenes_1639_v65                          | Listeria_monocytogenes_1639_v44 | 0.9672 |
| Listeria_monocytogenes_1639_v64                          | Listeria_monocytogenes_1639_v44 | 0.9449 |
| Listeria_monocytogenes_1639_v63                          | Listeria_monocytogenes_1639_v44 | 0.937  |
| Listeria_monocytogenes_1639_v62                          | Listeria_monocytogenes_1639_v44 | 0.9561 |
| Listeria_monocytogenes_1639_v61                          | Listeria_monocytogenes_1639_v44 | 0.9772 |
| Listeria_monocytogenes_1639_v60                          | Listeria_monocytogenes_1639_v44 | 0.9437 |
| Listeria_monocytogenes_1639_v5                           | Listeria_monocytogenes_1639_v44 | 0.8916 |
| Listeria_monocytogenes_1639_v59                          | Listeria_monocytogenes_1639_v44 | 0.9218 |
| Listeria_monocytogenes_1639_v58                          | Listeria_monocytogenes_1639_v44 | 0.917  |
| Listeria_monocytogenes_1639_v57                          | Listeria_monocytogenes_1639_v44 | 0.9175 |
| Listeria_monocytogenes_1639_v56                          | Listeria_monocytogenes_1639_v44 | 0.9229 |
| Listeria_monocytogenes_1639_v55                          | Listeria_monocytogenes_1639_v44 | 0.9149 |
| Listeria_monocytogenes_1639_v54                          | Listeria_monocytogenes_1639_v44 | 0.9168 |
| Listeria_monocytogenes_1639_v53                          | Listeria_monocytogenes_1639_v44 | 0.9326 |

|                                                          |                                 |        |
|----------------------------------------------------------|---------------------------------|--------|
| Listeria_monocytogenes_1639_v52                          | Listeria_monocytogenes_1639_v44 | 0.9235 |
| Listeria_monocytogenes_1639_v51                          | Listeria_monocytogenes_1639_v44 | 0.9145 |
| Listeria_monocytogenes_1639_v50                          | Listeria_monocytogenes_1639_v44 | 0.9985 |
| Listeria_monocytogenes_1639_v4                           | Listeria_monocytogenes_1639_v44 | 0.9022 |
| Listeria_monocytogenes_1639_v49                          | Listeria_monocytogenes_1639_v44 | 0.9124 |
| Listeria_monocytogenes_1639_v48                          | Listeria_monocytogenes_1639_v44 | 0.9504 |
| Listeria_monocytogenes_1639_v47                          | Listeria_monocytogenes_1639_v44 | 0.9952 |
| Listeria_monocytogenes_1639_v46                          | Listeria_monocytogenes_1639_v44 | 0.9393 |
| Listeria_monocytogenes_1639_v45                          | Listeria_monocytogenes_1639_v44 | 0.9895 |
| Listeria_monocytogenes_1639_v44                          | Listeria_monocytogenes_1639_v44 | 0.0664 |
| Listeria_welshimeri_1643                                 | Listeria_monocytogenes_1639_v45 | 0.8562 |
| Listeria_welshimeri_serovar_6b_str_SLCC5334_386043       | Listeria_monocytogenes_1639_v45 | 0.8559 |
| Listeria_seeligeri_serovar_1_2b_str_SLCC3954_683837      | Listeria_monocytogenes_1639_v45 | 0.8614 |
| Listeria_seeligeri_FSL_S4-171_702452                     | Listeria_monocytogenes_1639_v45 | 0.8034 |
| Listeria_seeligeri_FSL_N1-067_702453                     | Listeria_monocytogenes_1639_v45 | 0.8305 |
| Listeria_seeligeri_1640_v1                               | Listeria_monocytogenes_1639_v45 | 0.8601 |
| Listeria_seeligeri_1640                                  | Listeria_monocytogenes_1639_v45 | 0.8568 |
| Listeria_monocytogenes_WSLC1042_1457188                  | Listeria_monocytogenes_1639_v45 | 0.9076 |
| Listeria_monocytogenes_WSLC1001_1457187                  | Listeria_monocytogenes_1639_v45 | 0.9419 |
| Listeria_monocytogenes_SLCC7179_879090                   | Listeria_monocytogenes_1639_v45 | 0.9384 |
| Listeria_monocytogenes_SLCC5850_882096                   | Listeria_monocytogenes_1639_v45 | 0.942  |
| Listeria_monocytogenes_SLCC2755_932919                   | Listeria_monocytogenes_1639_v45 | 0.9168 |
| Listeria_monocytogenes_SLCC2540_879089                   | Listeria_monocytogenes_1639_v45 | 0.9257 |
| Listeria_monocytogenes_SLCC2479_882020                   | Listeria_monocytogenes_1639_v45 | 0.9412 |
| Listeria_monocytogenes_SLCC2378_879088                   | Listeria_monocytogenes_1639_v45 | 0.9087 |
| Listeria_monocytogenes_SLCC2376_882097                   | Listeria_monocytogenes_1639_v45 | 0.9119 |
| Listeria_monocytogenes_SLCC2372_932920                   | Listeria_monocytogenes_1639_v45 | 0.942  |
| Listeria_monocytogenes_serotype_4b_str_LL195_1230340     | Listeria_monocytogenes_1639_v45 | 0.9133 |
| Listeria_monocytogenes_serotype_4b_str_LIS0087_1134669   | Listeria_monocytogenes_1639_v45 | 0.9247 |
| Listeria_monocytogenes_serotype_4b_str_F2365_265669      | Listeria_monocytogenes_1639_v45 | 0.9133 |
| Listeria_monocytogenes_serotype_4b_str_CLIP_80459_568819 | Listeria_monocytogenes_1639_v45 | 0.9199 |
| Listeria_monocytogenes_serotype_4b_str_81-0861_1196161   | Listeria_monocytogenes_1639_v45 | 0.9052 |
| Listeria_monocytogenes_serotype_4b_str_81-0592_1196160   | Listeria_monocytogenes_1639_v45 | 0.9063 |
| Listeria_monocytogenes_serotype_4b_str_81-0558_1196159   | Listeria_monocytogenes_1639_v45 | 0.9066 |
| Listeria_monocytogenes_serotype_4b_str_10-0809_1196162   | Listeria_monocytogenes_1639_v45 | 0.9063 |
| Listeria_monocytogenes_serotype_4b_str_02-6680_1196175   | Listeria_monocytogenes_1639_v45 | 0.9171 |
| Listeria_monocytogenes_serotype_4b_str_02-6679_1196174   | Listeria_monocytogenes_1639_v45 | 0.9171 |
| Listeria_monocytogenes_serotype_4b_str_02-1792_1196173   | Listeria_monocytogenes_1639_v45 | 0.9077 |
| Listeria_monocytogenes_serotype_4b_str_02-1289_1196172   | Listeria_monocytogenes_1639_v45 | 0.9077 |
| Listeria_monocytogenes_serotype_4b_str_02-1103_1196171   | Listeria_monocytogenes_1639_v45 | 0.9077 |
| Listeria_monocytogenes_serotype_3c_str_10-5027_1196195   | Listeria_monocytogenes_1639_v45 | 0.9441 |
| Listeria_monocytogenes_serotype_1_2c_str_10-5026_1196194 | Listeria_monocytogenes_1639_v45 | 0.9444 |
| Listeria_monocytogenes_serotype_1_2c_str_10-5025_1196193 | Listeria_monocytogenes_1639_v45 | 0.9444 |
| Listeria_monocytogenes_serotype_1_2b_str_10-0811_1196164 | Listeria_monocytogenes_1639_v45 | 0.9254 |
| Listeria_monocytogenes_serotype_1_2b_str_10-0810_1196163 | Listeria_monocytogenes_1639_v45 | 0.9254 |
| Listeria_monocytogenes_serotype_1_2a_str_99-6370_1196179 | Listeria_monocytogenes_1639_v45 | 0.9841 |
| Listeria_monocytogenes_serotype_1_2a_str_98-2035_1196178 | Listeria_monocytogenes_1639_v45 | 0.9841 |
| Listeria_monocytogenes_serotype_1_2a_str_95-0093_1196177 | Listeria_monocytogenes_1639_v45 | 0.988  |
| Listeria_monocytogenes_serotype_1_2a_str_88-0478_1196176 | Listeria_monocytogenes_1639_v45 | 0.9837 |
| Listeria_monocytogenes_serotype_1_2a_str_10-5024_1196192 | Listeria_monocytogenes_1639_v45 | 0.9895 |
| Listeria_monocytogenes_serotype_1_2a_str_10-4758_1196168 | Listeria_monocytogenes_1639_v45 | 0.9406 |
| Listeria_monocytogenes_serotype_1_2a_str_10-4754_1196167 | Listeria_monocytogenes_1639_v45 | 0.9409 |
| Listeria_monocytogenes_serotype_1_2a_str_10-1321_1196191 | Listeria_monocytogenes_1639_v45 | 0.9895 |
| Listeria_monocytogenes_serotype_1_2a_str_10-1047_1196190 | Listeria_monocytogenes_1639_v45 | 0.9866 |
| Listeria_monocytogenes_serotype_1_2a_str_10-1046_1196189 | Listeria_monocytogenes_1639_v45 | 0.9866 |
| Listeria_monocytogenes_serotype_1_2a_str_10-0934_1196170 | Listeria_monocytogenes_1639_v45 | 0.9394 |
| Listeria_monocytogenes_serotype_1_2a_str_10-0933_1196169 | Listeria_monocytogenes_1639_v45 | 0.9394 |
| Listeria_monocytogenes_serotype_1_2a_str_10-0815_1196188 | Listeria_monocytogenes_1639_v45 | 0.9855 |
| Listeria_monocytogenes_serotype_1_2a_str_10-0814_1196187 | Listeria_monocytogenes_1639_v45 | 0.9898 |
| Listeria_monocytogenes_serotype_1_2a_str_10-0813_1196166 | Listeria_monocytogenes_1639_v45 | 0.9446 |
| Listeria_monocytogenes_serotype_1_2a_str_10-0812_1196165 | Listeria_monocytogenes_1639_v45 | 0.9446 |
| Listeria_monocytogenes_serotype_1_2a_str_08-7669_1196186 | Listeria_monocytogenes_1639_v45 | 0.9795 |
| Listeria_monocytogenes_serotype_1_2a_str_08-7374_1196185 | Listeria_monocytogenes_1639_v45 | 0.9895 |
| Listeria_monocytogenes_serotype_1_2a_str_08-6997_1196184 | Listeria_monocytogenes_1639_v45 | 0.9855 |
| Listeria_monocytogenes_serotype_1_2a_str_08-6569_1196183 | Listeria_monocytogenes_1639_v45 | 0.9855 |
| Listeria_monocytogenes_serotype_1_2a_str_08-6056_1196182 | Listeria_monocytogenes_1639_v45 | 0.9855 |
| Listeria_monocytogenes_serotype_1_2a_str_04-5457_1196181 | Listeria_monocytogenes_1639_v45 | 0.9895 |
| Listeria_monocytogenes_serotype_1_2a_str_02-5993_1196180 | Listeria_monocytogenes_1639_v45 | 0.9895 |
| Listeria_monocytogenes_R479a_1437838                     | Listeria_monocytogenes_1639_v45 | 0.9753 |
| Listeria_monocytogenes_N53-1_1234142                     | Listeria_monocytogenes_1639_v45 | 0.8848 |
| Listeria_monocytogenes_M7_1030009                        | Listeria_monocytogenes_1639_v45 | 0.8912 |
| Listeria_monocytogenes_LO28_393132                       | Listeria_monocytogenes_1639_v45 | 0.9343 |
| Listeria_monocytogenes_L99_563174                        | Listeria_monocytogenes_1639_v45 | 0.8915 |
| Listeria_monocytogenes_L312_882094                       | Listeria_monocytogenes_1639_v45 | 0.9199 |
| Listeria_monocytogenes_J1816_930781                      | Listeria_monocytogenes_1639_v45 | 0.9106 |
| Listeria_monocytogenes_J1-220_930782                     | Listeria_monocytogenes_1639_v45 | 0.9113 |
| Listeria_monocytogenes_J0161_393130                      | Listeria_monocytogenes_1639_v45 | 0.9332 |
| Listeria_monocytogenes_HCC23_552536                      | Listeria_monocytogenes_1639_v45 | 0.8909 |
| Listeria_monocytogenes_FSL_R2-561_393126                 | Listeria_monocytogenes_1639_v45 | 0.9416 |
| Listeria_monocytogenes_FSL_J1-208_393119                 | Listeria_monocytogenes_1639_v45 | 0.8805 |
| Listeria_monocytogenes_FSL_J1-175_393118                 | Listeria_monocytogenes_1639_v45 | 0.9235 |
| Listeria_monocytogenes_Finland_1998_393127               | Listeria_monocytogenes_1639_v45 | 0.9398 |
| Listeria_monocytogenes_EGD-e_169963_v1                   | Listeria_monocytogenes_1639_v45 | 0.9337 |
| Listeria_monocytogenes_EGD-e_169963                      | Listeria_monocytogenes_1639_v45 | 0.934  |
| Listeria_monocytogenes_EGD_1334565                       | Listeria_monocytogenes_1639_v45 | 0.9427 |
| Listeria_monocytogenes_CFSAN002349_1299895               | Listeria_monocytogenes_1639_v45 | 0.9172 |
| Listeria_monocytogenes_ATCC_19117_882095_v1              | Listeria_monocytogenes_1639_v45 | 0.9125 |
| Listeria_monocytogenes_ATCC_19117_882095                 | Listeria_monocytogenes_1639_v45 | 0.9121 |
| Listeria_monocytogenes_6179_1288295                      | Listeria_monocytogenes_1639_v45 | 0.9456 |
| Listeria_monocytogenes_1639_v9                           | Listeria_monocytogenes_1639_v45 | 0.9138 |
| Listeria_monocytogenes_1639_v99                          | Listeria_monocytogenes_1639_v45 | 0.9183 |

|                                                          |                                 |        |
|----------------------------------------------------------|---------------------------------|--------|
| Listeria_monocytogenes_1639_v98                          | Listeria_monocytogenes_1639_v45 | 0.9313 |
| Listeria_monocytogenes_1639_v97                          | Listeria_monocytogenes_1639_v45 | 0.9155 |
| Listeria_monocytogenes_1639_v96                          | Listeria_monocytogenes_1639_v45 | 0.9169 |
| Listeria_monocytogenes_1639_v95                          | Listeria_monocytogenes_1639_v45 | 0.917  |
| Listeria_monocytogenes_1639_v94                          | Listeria_monocytogenes_1639_v45 | 0.9176 |
| Listeria_monocytogenes_1639_v93                          | Listeria_monocytogenes_1639_v45 | 0.94   |
| Listeria_monocytogenes_1639_v92                          | Listeria_monocytogenes_1639_v45 | 0.9191 |
| Listeria_monocytogenes_1639_v91                          | Listeria_monocytogenes_1639_v45 | 0.9124 |
| Listeria_monocytogenes_1639_v90                          | Listeria_monocytogenes_1639_v45 | 0.9313 |
| Listeria_monocytogenes_1639_v8                           | Listeria_monocytogenes_1639_v45 | 0.9659 |
| Listeria_monocytogenes_1639_v89                          | Listeria_monocytogenes_1639_v45 | 0.9188 |
| Listeria_monocytogenes_1639_v88                          | Listeria_monocytogenes_1639_v45 | 0.9462 |
| Listeria_monocytogenes_1639_v87                          | Listeria_monocytogenes_1639_v45 | 0.9391 |
| Listeria_monocytogenes_1639_v86                          | Listeria_monocytogenes_1639_v45 | 0.9387 |
| Listeria_monocytogenes_1639_v85                          | Listeria_monocytogenes_1639_v45 | 0.9053 |
| Listeria_monocytogenes_1639_v84                          | Listeria_monocytogenes_1639_v45 | 0.9471 |
| Listeria_monocytogenes_1639_v83                          | Listeria_monocytogenes_1639_v45 | 0.9076 |
| Listeria_monocytogenes_1639_v82                          | Listeria_monocytogenes_1639_v45 | 0.9073 |
| Listeria_monocytogenes_1639_v81                          | Listeria_monocytogenes_1639_v45 | 0.9505 |
| Listeria_monocytogenes_1639_v80                          | Listeria_monocytogenes_1639_v45 | 0.9258 |
| Listeria_monocytogenes_1639_v7                           | Listeria_monocytogenes_1639_v45 | 0.9659 |
| Listeria_monocytogenes_1639_v79                          | Listeria_monocytogenes_1639_v45 | 0.9473 |
| Listeria_monocytogenes_1639_v78                          | Listeria_monocytogenes_1639_v45 | 0.9513 |
| Listeria_monocytogenes_1639_v77                          | Listeria_monocytogenes_1639_v45 | 0.9382 |
| Listeria_monocytogenes_1639_v76                          | Listeria_monocytogenes_1639_v45 | 0.9356 |
| Listeria_monocytogenes_1639_v75                          | Listeria_monocytogenes_1639_v45 | 0.8915 |
| Listeria_monocytogenes_1639_v74                          | Listeria_monocytogenes_1639_v45 | 0.9336 |
| Listeria_monocytogenes_1639_v73                          | Listeria_monocytogenes_1639_v45 | 0.9412 |
| Listeria_monocytogenes_1639_v72                          | Listeria_monocytogenes_1639_v45 | 0.9079 |
| Listeria_monocytogenes_1639_v71                          | Listeria_monocytogenes_1639_v45 | 0.9344 |
| Listeria_monocytogenes_1639_v70                          | Listeria_monocytogenes_1639_v45 | 0.9432 |
| Listeria_monocytogenes_1639_v6                           | Listeria_monocytogenes_1639_v45 | 0.9656 |
| Listeria_monocytogenes_1639_v69                          | Listeria_monocytogenes_1639_v45 | 0.9063 |
| Listeria_monocytogenes_1639_v68                          | Listeria_monocytogenes_1639_v45 | 0.9267 |
| Listeria_monocytogenes_1639_v67                          | Listeria_monocytogenes_1639_v45 | 0.926  |
| Listeria_monocytogenes_1639_v66                          | Listeria_monocytogenes_1639_v45 | 0.9396 |
| Listeria_monocytogenes_1639_v65                          | Listeria_monocytogenes_1639_v45 | 0.9574 |
| Listeria_monocytogenes_1639_v64                          | Listeria_monocytogenes_1639_v45 | 0.936  |
| Listeria_monocytogenes_1639_v63                          | Listeria_monocytogenes_1639_v45 | 0.9344 |
| Listeria_monocytogenes_1639_v62                          | Listeria_monocytogenes_1639_v45 | 0.946  |
| Listeria_monocytogenes_1639_v61                          | Listeria_monocytogenes_1639_v45 | 0.9668 |
| Listeria_monocytogenes_1639_v60                          | Listeria_monocytogenes_1639_v45 | 0.934  |
| Listeria_monocytogenes_1639_v5                           | Listeria_monocytogenes_1639_v45 | 0.8955 |
| Listeria_monocytogenes_1639_v59                          | Listeria_monocytogenes_1639_v45 | 0.9127 |
| Listeria_monocytogenes_1639_v58                          | Listeria_monocytogenes_1639_v45 | 0.9083 |
| Listeria_monocytogenes_1639_v57                          | Listeria_monocytogenes_1639_v45 | 0.9082 |
| Listeria_monocytogenes_1639_v56                          | Listeria_monocytogenes_1639_v45 | 0.9142 |
| Listeria_monocytogenes_1639_v55                          | Listeria_monocytogenes_1639_v45 | 0.9125 |
| Listeria_monocytogenes_1639_v54                          | Listeria_monocytogenes_1639_v45 | 0.9081 |
| Listeria_monocytogenes_1639_v53                          | Listeria_monocytogenes_1639_v45 | 0.9241 |
| Listeria_monocytogenes_1639_v52                          | Listeria_monocytogenes_1639_v45 | 0.9144 |
| Listeria_monocytogenes_1639_v51                          | Listeria_monocytogenes_1639_v45 | 0.9103 |
| Listeria_monocytogenes_1639_v50                          | Listeria_monocytogenes_1639_v45 | 0.9884 |
| Listeria_monocytogenes_1639_v4                           | Listeria_monocytogenes_1639_v45 | 0.9011 |
| Listeria_monocytogenes_1639_v49                          | Listeria_monocytogenes_1639_v45 | 0.9034 |
| Listeria_monocytogenes_1639_v48                          | Listeria_monocytogenes_1639_v45 | 0.9408 |
| Listeria_monocytogenes_1639_v47                          | Listeria_monocytogenes_1639_v45 | 0.9848 |
| Listeria_monocytogenes_1639_v46                          | Listeria_monocytogenes_1639_v45 | 0.9304 |
| Listeria_monocytogenes_1639_v45                          | Listeria_monocytogenes_1639_v45 | 0.069  |
| Listeria_welshimeri_1643                                 | Listeria_monocytogenes_1639_v46 | 0.8757 |
| Listeria_welshimeri_serovar_6b_str_SLCC5334_386043       | Listeria_monocytogenes_1639_v46 | 0.875  |
| Listeria_seeligeri_serovar_1_2b_str_SLCC3954_683837      | Listeria_monocytogenes_1639_v46 | 0.8844 |
| Listeria_seeligeri_FSL_S4-171_702452                     | Listeria_monocytogenes_1639_v46 | 0.8219 |
| Listeria_seeligeri_FSL_N1-067_702453                     | Listeria_monocytogenes_1639_v46 | 0.84   |
| Listeria_seeligeri_1640_v1                               | Listeria_monocytogenes_1639_v46 | 0.8809 |
| Listeria_seeligeri_1640                                  | Listeria_monocytogenes_1639_v46 | 0.8798 |
| Listeria_monocytogenes_WSLC1042_1457188                  | Listeria_monocytogenes_1639_v46 | 0.9356 |
| Listeria_monocytogenes_WSLC1001_1457187                  | Listeria_monocytogenes_1639_v46 | 0.9441 |
| Listeria_monocytogenes_SLCC7179_879090                   | Listeria_monocytogenes_1639_v46 | 0.9523 |
| Listeria_monocytogenes_SLCC5850_882096                   | Listeria_monocytogenes_1639_v46 | 0.948  |
| Listeria_monocytogenes_SLCC2755_932919                   | Listeria_monocytogenes_1639_v46 | 0.9323 |
| Listeria_monocytogenes_SLCC2540_879089                   | Listeria_monocytogenes_1639_v46 | 0.9321 |
| Listeria_monocytogenes_SLCC2479_882020                   | Listeria_monocytogenes_1639_v46 | 0.9478 |
| Listeria_monocytogenes_SLCC2378_879088                   | Listeria_monocytogenes_1639_v46 | 0.937  |
| Listeria_monocytogenes_SLCC2376_882097                   | Listeria_monocytogenes_1639_v46 | 0.9317 |
| Listeria_monocytogenes_SLCC2372_932920                   | Listeria_monocytogenes_1639_v46 | 0.9412 |
| Listeria_monocytogenes_serotype_4b_str_LL195_1230340     | Listeria_monocytogenes_1639_v46 | 0.9328 |
| Listeria_monocytogenes_serotype_4b_str_LIS0087_1134669   | Listeria_monocytogenes_1639_v46 | 0.9255 |
| Listeria_monocytogenes_serotype_4b_str_F2365_265669      | Listeria_monocytogenes_1639_v46 | 0.9328 |
| Listeria_monocytogenes_serotype_4b_str_CLIP_80459_568819 | Listeria_monocytogenes_1639_v46 | 0.9392 |
| Listeria_monocytogenes_serotype_4b_str_81-0861_1196161   | Listeria_monocytogenes_1639_v46 | 0.9291 |
| Listeria_monocytogenes_serotype_4b_str_81-0592_1196160   | Listeria_monocytogenes_1639_v46 | 0.9302 |
| Listeria_monocytogenes_serotype_4b_str_81-0558_1196159   | Listeria_monocytogenes_1639_v46 | 0.9309 |
| Listeria_monocytogenes_serotype_4b_str_10-0809_1196162   | Listeria_monocytogenes_1639_v46 | 0.9302 |
| Listeria_monocytogenes_serotype_4b_str_02-6680_1196175   | Listeria_monocytogenes_1639_v46 | 0.9355 |
| Listeria_monocytogenes_serotype_4b_str_02-6679_1196174   | Listeria_monocytogenes_1639_v46 | 0.9355 |
| Listeria_monocytogenes_serotype_4b_str_02-1792_1196173   | Listeria_monocytogenes_1639_v46 | 0.9309 |
| Listeria_monocytogenes_serotype_4b_str_02-1289_1196172   | Listeria_monocytogenes_1639_v46 | 0.9309 |
| Listeria_monocytogenes_serotype_4b_str_02-1103_1196171   | Listeria_monocytogenes_1639_v46 | 0.9309 |
| Listeria_monocytogenes_serotype_3c_str_10-5027_1196195   | Listeria_monocytogenes_1639_v46 | 0.9486 |
| Listeria_monocytogenes_serotype_1_2c_str_10-5026_1196194 | Listeria_monocytogenes_1639_v46 | 0.9499 |

|                                                          |                                 |        |
|----------------------------------------------------------|---------------------------------|--------|
| Listeria_monocytogenes_serotype_1_2c_str_10-5025_1196193 | Listeria_monocytogenes_1639_v46 | 0.9497 |
| Listeria_monocytogenes_serotype_1_2b_str_10-0811_1196164 | Listeria_monocytogenes_1639_v46 | 0.925  |
| Listeria_monocytogenes_serotype_1_2b_str_10-0810_1196163 | Listeria_monocytogenes_1639_v46 | 0.925  |
| Listeria_monocytogenes_serotype_1_2a_str_99-6370_1196179 | Listeria_monocytogenes_1639_v46 | 0.9342 |
| Listeria_monocytogenes_serotype_1_2a_str_98-2035_1196178 | Listeria_monocytogenes_1639_v46 | 0.9342 |
| Listeria_monocytogenes_serotype_1_2a_str_95-0093_1196177 | Listeria_monocytogenes_1639_v46 | 0.9389 |
| Listeria_monocytogenes_serotype_1_2a_str_88-0478_1196176 | Listeria_monocytogenes_1639_v46 | 0.9381 |
| Listeria_monocytogenes_serotype_1_2a_str_10-5024_1196192 | Listeria_monocytogenes_1639_v46 | 0.9393 |
| Listeria_monocytogenes_serotype_1_2a_str_10-4758_1196168 | Listeria_monocytogenes_1639_v46 | 0.9492 |
| Listeria_monocytogenes_serotype_1_2a_str_10-4754_1196167 | Listeria_monocytogenes_1639_v46 | 0.9492 |
| Listeria_monocytogenes_serotype_1_2a_str_10-1321_1196191 | Listeria_monocytogenes_1639_v46 | 0.9393 |
| Listeria_monocytogenes_serotype_1_2a_str_10-1047_1196190 | Listeria_monocytogenes_1639_v46 | 0.9396 |
| Listeria_monocytogenes_serotype_1_2a_str_10-1046_1196189 | Listeria_monocytogenes_1639_v46 | 0.9396 |
| Listeria_monocytogenes_serotype_1_2a_str_10-0934_1196170 | Listeria_monocytogenes_1639_v46 | 0.9562 |
| Listeria_monocytogenes_serotype_1_2a_str_10-0933_1196169 | Listeria_monocytogenes_1639_v46 | 0.9562 |
| Listeria_monocytogenes_serotype_1_2a_str_10-0815_1196188 | Listeria_monocytogenes_1639_v46 | 0.9348 |
| Listeria_monocytogenes_serotype_1_2a_str_10-0814_1196187 | Listeria_monocytogenes_1639_v46 | 0.9393 |
| Listeria_monocytogenes_serotype_1_2a_str_10-0813_1196166 | Listeria_monocytogenes_1639_v46 | 0.9439 |
| Listeria_monocytogenes_serotype_1_2a_str_10-0812_1196165 | Listeria_monocytogenes_1639_v46 | 0.9439 |
| Listeria_monocytogenes_serotype_1_2a_str_08-7669_1196186 | Listeria_monocytogenes_1639_v46 | 0.9476 |
| Listeria_monocytogenes_serotype_1_2a_str_08-7374_1196185 | Listeria_monocytogenes_1639_v46 | 0.9393 |
| Listeria_monocytogenes_serotype_1_2a_str_08-6997_1196184 | Listeria_monocytogenes_1639_v46 | 0.9348 |
| Listeria_monocytogenes_serotype_1_2a_str_08-6569_1196183 | Listeria_monocytogenes_1639_v46 | 0.9348 |
| Listeria_monocytogenes_serotype_1_2a_str_08-6056_1196182 | Listeria_monocytogenes_1639_v46 | 0.9348 |
| Listeria_monocytogenes_serotype_1_2a_str_04-5457_1196181 | Listeria_monocytogenes_1639_v46 | 0.9393 |
| Listeria_monocytogenes_serotype_1_2a_str_02-5993_1196180 | Listeria_monocytogenes_1639_v46 | 0.9389 |
| Listeria_monocytogenes_R479a_1437838                     | Listeria_monocytogenes_1639_v46 | 0.939  |
| Listeria_monocytogenes_N53-1_1234142                     | Listeria_monocytogenes_1639_v46 | 0.9033 |
| Listeria_monocytogenes_M7_1030009                        | Listeria_monocytogenes_1639_v46 | 0.9028 |
| Listeria_monocytogenes_LO28_393132                       | Listeria_monocytogenes_1639_v46 | 0.9431 |
| Listeria_monocytogenes_L99_563174                        | Listeria_monocytogenes_1639_v46 | 0.9035 |
| Listeria_monocytogenes_L312_882094                       | Listeria_monocytogenes_1639_v46 | 0.9392 |
| Listeria_monocytogenes_J1816_930781                      | Listeria_monocytogenes_1639_v46 | 0.926  |
| Listeria_monocytogenes_J1-220_930782                     | Listeria_monocytogenes_1639_v46 | 0.9248 |
| Listeria_monocytogenes_J0161_393130                      | Listeria_monocytogenes_1639_v46 | 0.971  |
| Listeria_monocytogenes_HCC23_552536                      | Listeria_monocytogenes_1639_v46 | 0.9031 |
| Listeria_monocytogenes_FSL_R2-561_393126                 | Listeria_monocytogenes_1639_v46 | 0.9464 |
| Listeria_monocytogenes_FSL_J1-208_393119                 | Listeria_monocytogenes_1639_v46 | 0.8997 |
| Listeria_monocytogenes_FSL_J1-175_393118                 | Listeria_monocytogenes_1639_v46 | 0.9352 |
| Listeria_monocytogenes_Finland_1998_393127               | Listeria_monocytogenes_1639_v46 | 0.9592 |
| Listeria_monocytogenes_EGD-e_169963_v1                   | Listeria_monocytogenes_1639_v46 | 0.9511 |
| Listeria_monocytogenes_EGD-e_169963                      | Listeria_monocytogenes_1639_v46 | 0.9515 |
| Listeria_monocytogenes_EGD_1334565                       | Listeria_monocytogenes_1639_v46 | 0.9483 |
| Listeria_monocytogenes_CFSAN002349_1299895               | Listeria_monocytogenes_1639_v46 | 0.9352 |
| Listeria_monocytogenes_ATCC_19117_882095_v1              | Listeria_monocytogenes_1639_v46 | 0.9414 |
| Listeria_monocytogenes_ATCC_19117_882095                 | Listeria_monocytogenes_1639_v46 | 0.9414 |
| Listeria_monocytogenes_6179_1288295                      | Listeria_monocytogenes_1639_v46 | 0.9442 |
| Listeria_monocytogenes_1639_v9                           | Listeria_monocytogenes_1639_v46 | 0.9173 |
| Listeria_monocytogenes_1639_v99                          | Listeria_monocytogenes_1639_v46 | 0.9279 |
| Listeria_monocytogenes_1639_v98                          | Listeria_monocytogenes_1639_v46 | 0.9508 |
| Listeria_monocytogenes_1639_v97                          | Listeria_monocytogenes_1639_v46 | 0.9344 |
| Listeria_monocytogenes_1639_v96                          | Listeria_monocytogenes_1639_v46 | 0.9264 |
| Listeria_monocytogenes_1639_v95                          | Listeria_monocytogenes_1639_v46 | 0.9265 |
| Listeria_monocytogenes_1639_v94                          | Listeria_monocytogenes_1639_v46 | 0.9268 |
| Listeria_monocytogenes_1639_v93                          | Listeria_monocytogenes_1639_v46 | 0.9374 |
| Listeria_monocytogenes_1639_v92                          | Listeria_monocytogenes_1639_v46 | 0.9275 |
| Listeria_monocytogenes_1639_v91                          | Listeria_monocytogenes_1639_v46 | 0.9181 |
| Listeria_monocytogenes_1639_v90                          | Listeria_monocytogenes_1639_v46 | 0.9508 |
| Listeria_monocytogenes_1639_v8                           | Listeria_monocytogenes_1639_v46 | 0.9294 |
| Listeria_monocytogenes_1639_v89                          | Listeria_monocytogenes_1639_v46 | 0.9345 |
| Listeria_monocytogenes_1639_v88                          | Listeria_monocytogenes_1639_v46 | 0.9473 |
| Listeria_monocytogenes_1639_v87                          | Listeria_monocytogenes_1639_v46 | 0.939  |
| Listeria_monocytogenes_1639_v86                          | Listeria_monocytogenes_1639_v46 | 0.9386 |
| Listeria_monocytogenes_1639_v85                          | Listeria_monocytogenes_1639_v46 | 0.9285 |
| Listeria_monocytogenes_1639_v84                          | Listeria_monocytogenes_1639_v46 | 0.9532 |
| Listeria_monocytogenes_1639_v83                          | Listeria_monocytogenes_1639_v46 | 0.9342 |
| Listeria_monocytogenes_1639_v82                          | Listeria_monocytogenes_1639_v46 | 0.9335 |
| Listeria_monocytogenes_1639_v81                          | Listeria_monocytogenes_1639_v46 | 0.9529 |
| Listeria_monocytogenes_1639_v80                          | Listeria_monocytogenes_1639_v46 | 0.9296 |
| Listeria_monocytogenes_1639_v7                           | Listeria_monocytogenes_1639_v46 | 0.9294 |
| Listeria_monocytogenes_1639_v79                          | Listeria_monocytogenes_1639_v46 | 0.9504 |
| Listeria_monocytogenes_1639_v78                          | Listeria_monocytogenes_1639_v46 | 0.9518 |
| Listeria_monocytogenes_1639_v77                          | Listeria_monocytogenes_1639_v46 | 0.9531 |
| Listeria_monocytogenes_1639_v76                          | Listeria_monocytogenes_1639_v46 | 0.9433 |
| Listeria_monocytogenes_1639_v75                          | Listeria_monocytogenes_1639_v46 | 0.9035 |
| Listeria_monocytogenes_1639_v74                          | Listeria_monocytogenes_1639_v46 | 0.9364 |
| Listeria_monocytogenes_1639_v73                          | Listeria_monocytogenes_1639_v46 | 0.936  |
| Listeria_monocytogenes_1639_v72                          | Listeria_monocytogenes_1639_v46 | 0.9323 |
| Listeria_monocytogenes_1639_v71                          | Listeria_monocytogenes_1639_v46 | 0.9402 |
| Listeria_monocytogenes_1639_v70                          | Listeria_monocytogenes_1639_v46 | 0.9451 |
| Listeria_monocytogenes_1639_v6                           | Listeria_monocytogenes_1639_v46 | 0.9287 |
| Listeria_monocytogenes_1639_v69                          | Listeria_monocytogenes_1639_v46 | 0.9305 |
| Listeria_monocytogenes_1639_v68                          | Listeria_monocytogenes_1639_v46 | 0.985  |
| Listeria_monocytogenes_1639_v67                          | Listeria_monocytogenes_1639_v46 | 0.9357 |
| Listeria_monocytogenes_1639_v66                          | Listeria_monocytogenes_1639_v46 | 0.9492 |
| Listeria_monocytogenes_1639_v65                          | Listeria_monocytogenes_1639_v46 | 0.9358 |
| Listeria_monocytogenes_1639_v64                          | Listeria_monocytogenes_1639_v46 | 0.9444 |
| Listeria_monocytogenes_1639_v63                          | Listeria_monocytogenes_1639_v46 | 0.9302 |
| Listeria_monocytogenes_1639_v62                          | Listeria_monocytogenes_1639_v46 | 0.9468 |
| Listeria_monocytogenes_1639_v61                          | Listeria_monocytogenes_1639_v46 | 0.9417 |
| Listeria_monocytogenes_1639_v60                          | Listeria_monocytogenes_1639_v46 | 0.9716 |

|                                                          |                                 |        |
|----------------------------------------------------------|---------------------------------|--------|
| Listeria_monocytogenes_1639_v5                           | Listeria_monocytogenes_1639_v46 | 0.8931 |
| Listeria_monocytogenes_1639_v59                          | Listeria_monocytogenes_1639_v46 | 0.9323 |
| Listeria_monocytogenes_1639_v58                          | Listeria_monocytogenes_1639_v46 | 0.9331 |
| Listeria_monocytogenes_1639_v57                          | Listeria_monocytogenes_1639_v46 | 0.9223 |
| Listeria_monocytogenes_1639_v56                          | Listeria_monocytogenes_1639_v46 | 0.9398 |
| Listeria_monocytogenes_1639_v55                          | Listeria_monocytogenes_1639_v46 | 0.9215 |
| Listeria_monocytogenes_1639_v54                          | Listeria_monocytogenes_1639_v46 | 0.9232 |
| Listeria_monocytogenes_1639_v53                          | Listeria_monocytogenes_1639_v46 | 0.9465 |
| Listeria_monocytogenes_1639_v52                          | Listeria_monocytogenes_1639_v46 | 0.9214 |
| Listeria_monocytogenes_1639_v51                          | Listeria_monocytogenes_1639_v46 | 0.9293 |
| Listeria_monocytogenes_1639_v50                          | Listeria_monocytogenes_1639_v46 | 0.9382 |
| Listeria_monocytogenes_1639_v4                           | Listeria_monocytogenes_1639_v46 | 0.9054 |
| Listeria_monocytogenes_1639_v49                          | Listeria_monocytogenes_1639_v46 | 0.9272 |
| Listeria_monocytogenes_1639_v48                          | Listeria_monocytogenes_1639_v46 | 0.9441 |
| Listeria_monocytogenes_1639_v47                          | Listeria_monocytogenes_1639_v46 | 0.9389 |
| Listeria_monocytogenes_1639_v46                          | Listeria_monocytogenes_1639_v46 | 0.0691 |
| Listeria_welshimeri_1643                                 | Listeria_monocytogenes_1639_v47 | 0.8633 |
| Listeria_welshimeri_serovar_6b_str_SLCC5334_386043       | Listeria_monocytogenes_1639_v47 | 0.8627 |
| Listeria_seeligeri_serovar_1_2b_str_SLCC3954_683837      | Listeria_monocytogenes_1639_v47 | 0.8699 |
| Listeria_seeligeri_FSL_S4-171_702452                     | Listeria_monocytogenes_1639_v47 | 0.8105 |
| Listeria_seeligeri_FSL_N1-067_702453                     | Listeria_monocytogenes_1639_v47 | 0.8307 |
| Listeria_seeligeri_1640_v1                               | Listeria_monocytogenes_1639_v47 | 0.8673 |
| Listeria_seeligeri_1640                                  | Listeria_monocytogenes_1639_v47 | 0.8646 |
| Listeria_monocytogenes_WSLC1042_1457188                  | Listeria_monocytogenes_1639_v47 | 0.916  |
| Listeria_monocytogenes_WSLC1001_1457187                  | Listeria_monocytogenes_1639_v47 | 0.9524 |
| Listeria_monocytogenes_SLCC7179_879090                   | Listeria_monocytogenes_1639_v47 | 0.9482 |
| Listeria_monocytogenes_SLCC5850_882096                   | Listeria_monocytogenes_1639_v47 | 0.9526 |
| Listeria_monocytogenes_SLCC2755_932919                   | Listeria_monocytogenes_1639_v47 | 0.9178 |
| Listeria_monocytogenes_SLCC2540_879089                   | Listeria_monocytogenes_1639_v47 | 0.9338 |
| Listeria_monocytogenes_SLCC2479_882020                   | Listeria_monocytogenes_1639_v47 | 0.9509 |
| Listeria_monocytogenes_SLCC2378_879088                   | Listeria_monocytogenes_1639_v47 | 0.9174 |
| Listeria_monocytogenes_SLCC2376_882097                   | Listeria_monocytogenes_1639_v47 | 0.9213 |
| Listeria_monocytogenes_SLCC2372_932920                   | Listeria_monocytogenes_1639_v47 | 0.944  |
| Listeria_monocytogenes_serotype_4b_str_LL195_1230340     | Listeria_monocytogenes_1639_v47 | 0.9225 |
| Listeria_monocytogenes_serotype_4b_str_LIS0087_1134669   | Listeria_monocytogenes_1639_v47 | 0.933  |
| Listeria_monocytogenes_serotype_4b_str_F2365_265669      | Listeria_monocytogenes_1639_v47 | 0.9225 |
| Listeria_monocytogenes_serotype_4b_str_CLIP_80459_568819 | Listeria_monocytogenes_1639_v47 | 0.9292 |
| Listeria_monocytogenes_serotype_4b_str_81-0861_1196161   | Listeria_monocytogenes_1639_v47 | 0.9143 |
| Listeria_monocytogenes_serotype_4b_str_81-0592_1196160   | Listeria_monocytogenes_1639_v47 | 0.9153 |
| Listeria_monocytogenes_serotype_4b_str_81-0558_1196159   | Listeria_monocytogenes_1639_v47 | 0.916  |
| Listeria_monocytogenes_serotype_4b_str_10-0809_1196162   | Listeria_monocytogenes_1639_v47 | 0.9153 |
| Listeria_monocytogenes_serotype_4b_str_02-6680_1196175   | Listeria_monocytogenes_1639_v47 | 0.926  |
| Listeria_monocytogenes_serotype_4b_str_02-6679_1196174   | Listeria_monocytogenes_1639_v47 | 0.926  |
| Listeria_monocytogenes_serotype_4b_str_02-1792_1196173   | Listeria_monocytogenes_1639_v47 | 0.9168 |
| Listeria_monocytogenes_serotype_4b_str_02-1289_1196172   | Listeria_monocytogenes_1639_v47 | 0.9168 |
| Listeria_monocytogenes_serotype_4b_str_02-1103_1196171   | Listeria_monocytogenes_1639_v47 | 0.9168 |
| Listeria_monocytogenes_serotype_3c_str_10-5027_1196195   | Listeria_monocytogenes_1639_v47 | 0.9516 |
| Listeria_monocytogenes_serotype_1_2c_str_10-5026_1196194 | Listeria_monocytogenes_1639_v47 | 0.9527 |
| Listeria_monocytogenes_serotype_1_2c_str_10-5025_1196193 | Listeria_monocytogenes_1639_v47 | 0.9527 |
| Listeria_monocytogenes_serotype_1_2b_str_10-0811_1196164 | Listeria_monocytogenes_1639_v47 | 0.932  |
| Listeria_monocytogenes_serotype_1_2b_str_10-0810_1196163 | Listeria_monocytogenes_1639_v47 | 0.932  |
| Listeria_monocytogenes_serotype_1_2a_str_99-6370_1196179 | Listeria_monocytogenes_1639_v47 | 0.9887 |
| Listeria_monocytogenes_serotype_1_2a_str_98-2035_1196178 | Listeria_monocytogenes_1639_v47 | 0.9887 |
| Listeria_monocytogenes_serotype_1_2a_str_95-0093_1196177 | Listeria_monocytogenes_1639_v47 | 0.9941 |
| Listeria_monocytogenes_serotype_1_2a_str_88-0478_1196176 | Listeria_monocytogenes_1639_v47 | 0.9952 |
| Listeria_monocytogenes_serotype_1_2a_str_10-5024_1196192 | Listeria_monocytogenes_1639_v47 | 0.9952 |
| Listeria_monocytogenes_serotype_1_2a_str_10-4758_1196168 | Listeria_monocytogenes_1639_v47 | 0.95   |
| Listeria_monocytogenes_serotype_1_2a_str_10-4754_1196167 | Listeria_monocytogenes_1639_v47 | 0.95   |
| Listeria_monocytogenes_serotype_1_2a_str_10-1321_1196191 | Listeria_monocytogenes_1639_v47 | 0.9952 |
| Listeria_monocytogenes_serotype_1_2a_str_10-1047_1196190 | Listeria_monocytogenes_1639_v47 | 0.9952 |
| Listeria_monocytogenes_serotype_1_2a_str_10-1046_1196189 | Listeria_monocytogenes_1639_v47 | 0.9952 |
| Listeria_monocytogenes_serotype_1_2a_str_10-0934_1196170 | Listeria_monocytogenes_1639_v47 | 0.949  |
| Listeria_monocytogenes_serotype_1_2a_str_10-0933_1196169 | Listeria_monocytogenes_1639_v47 | 0.949  |
| Listeria_monocytogenes_serotype_1_2a_str_10-0815_1196188 | Listeria_monocytogenes_1639_v47 | 0.9901 |
| Listeria_monocytogenes_serotype_1_2a_str_10-0814_1196187 | Listeria_monocytogenes_1639_v47 | 0.9949 |
| Listeria_monocytogenes_serotype_1_2a_str_10-0813_1196166 | Listeria_monocytogenes_1639_v47 | 0.9529 |
| Listeria_monocytogenes_serotype_1_2a_str_10-0812_1196165 | Listeria_monocytogenes_1639_v47 | 0.9529 |
| Listeria_monocytogenes_serotype_1_2a_str_08-7669_1196186 | Listeria_monocytogenes_1639_v47 | 0.9893 |
| Listeria_monocytogenes_serotype_1_2a_str_08-7374_1196185 | Listeria_monocytogenes_1639_v47 | 0.9952 |
| Listeria_monocytogenes_serotype_1_2a_str_08-6997_1196184 | Listeria_monocytogenes_1639_v47 | 0.9901 |
| Listeria_monocytogenes_serotype_1_2a_str_08-6569_1196183 | Listeria_monocytogenes_1639_v47 | 0.9901 |
| Listeria_monocytogenes_serotype_1_2a_str_08-6056_1196182 | Listeria_monocytogenes_1639_v47 | 0.9901 |
| Listeria_monocytogenes_serotype_1_2a_str_04-5457_1196181 | Listeria_monocytogenes_1639_v47 | 0.9952 |
| Listeria_monocytogenes_serotype_1_2a_str_02-5993_1196180 | Listeria_monocytogenes_1639_v47 | 0.9949 |
| Listeria_monocytogenes_R479a_1437838                     | Listeria_monocytogenes_1639_v47 | 0.9663 |
| Listeria_monocytogenes_N53-1_1234142                     | Listeria_monocytogenes_1639_v47 | 0.8934 |
| Listeria_monocytogenes_M7_1030009                        | Listeria_monocytogenes_1639_v47 | 0.8982 |
| Listeria_monocytogenes_LO28_393132                       | Listeria_monocytogenes_1639_v47 | 0.944  |
| Listeria_monocytogenes_L99_563174                        | Listeria_monocytogenes_1639_v47 | 0.8989 |
| Listeria_monocytogenes_L312_882094                       | Listeria_monocytogenes_1639_v47 | 0.9292 |
| Listeria_monocytogenes_J1816_930781                      | Listeria_monocytogenes_1639_v47 | 0.9197 |
| Listeria_monocytogenes_J1-220_930782                     | Listeria_monocytogenes_1639_v47 | 0.9178 |
| Listeria_monocytogenes_J0161_393130                      | Listeria_monocytogenes_1639_v47 | 0.9436 |
| Listeria_monocytogenes_HCC23_552536                      | Listeria_monocytogenes_1639_v47 | 0.8985 |
| Listeria_monocytogenes_FSL_R2-561_393126                 | Listeria_monocytogenes_1639_v47 | 0.9491 |
| Listeria_monocytogenes_FSL_J1-208_393119                 | Listeria_monocytogenes_1639_v47 | 0.8883 |
| Listeria_monocytogenes_FSL_J1-175_393118                 | Listeria_monocytogenes_1639_v47 | 0.9321 |
| Listeria_monocytogenes_Finland_1998_393127               | Listeria_monocytogenes_1639_v47 | 0.9494 |
| Listeria_monocytogenes_EGD-e_169963_v1                   | Listeria_monocytogenes_1639_v47 | 0.9434 |
| Listeria_monocytogenes_EGD-e_169963                      | Listeria_monocytogenes_1639_v47 | 0.9434 |
| Listeria_monocytogenes_EGD_1334565                       | Listeria_monocytogenes_1639_v47 | 0.9533 |



|                                                          |                                 |        |
|----------------------------------------------------------|---------------------------------|--------|
| Listeria_monocytogenes_CFSAN002349_1299895               | Listeria_monocytogenes_1639_v47 | 0.9261 |
| Listeria_monocytogenes_ATCC_19117_882095_v1              | Listeria_monocytogenes_1639_v47 | 0.9209 |
| Listeria_monocytogenes_ATCC_19117_882095                 | Listeria_monocytogenes_1639_v47 | 0.9209 |
| Listeria_monocytogenes_6179_1288295                      | Listeria_monocytogenes_1639_v47 | 0.9415 |
| Listeria_monocytogenes_1639_v9                           | Listeria_monocytogenes_1639_v47 | 0.9213 |
| Listeria_monocytogenes_1639_v99                          | Listeria_monocytogenes_1639_v47 | 0.9208 |
| Listeria_monocytogenes_1639_v98                          | Listeria_monocytogenes_1639_v47 | 0.9413 |
| Listeria_monocytogenes_1639_v97                          | Listeria_monocytogenes_1639_v47 | 0.9254 |
| Listeria_monocytogenes_1639_v96                          | Listeria_monocytogenes_1639_v47 | 0.9194 |
| Listeria_monocytogenes_1639_v95                          | Listeria_monocytogenes_1639_v47 | 0.9194 |
| Listeria_monocytogenes_1639_v94                          | Listeria_monocytogenes_1639_v47 | 0.9198 |
| Listeria_monocytogenes_1639_v93                          | Listeria_monocytogenes_1639_v47 | 0.9343 |
| Listeria_monocytogenes_1639_v92                          | Listeria_monocytogenes_1639_v47 | 0.9216 |
| Listeria_monocytogenes_1639_v91                          | Listeria_monocytogenes_1639_v47 | 0.9222 |
| Listeria_monocytogenes_1639_v90                          | Listeria_monocytogenes_1639_v47 | 0.9413 |
| Listeria_monocytogenes_1639_v8                           | Listeria_monocytogenes_1639_v47 | 0.9565 |
| Listeria_monocytogenes_1639_v89                          | Listeria_monocytogenes_1639_v47 | 0.9277 |
| Listeria_monocytogenes_1639_v88                          | Listeria_monocytogenes_1639_v47 | 0.9571 |
| Listeria_monocytogenes_1639_v87                          | Listeria_monocytogenes_1639_v47 | 0.951  |
| Listeria_monocytogenes_1639_v86                          | Listeria_monocytogenes_1639_v47 | 0.9502 |
| Listeria_monocytogenes_1639_v85                          | Listeria_monocytogenes_1639_v47 | 0.914  |
| Listeria_monocytogenes_1639_v84                          | Listeria_monocytogenes_1639_v47 | 0.957  |
| Listeria_monocytogenes_1639_v83                          | Listeria_monocytogenes_1639_v47 | 0.9167 |
| Listeria_monocytogenes_1639_v82                          | Listeria_monocytogenes_1639_v47 | 0.9164 |
| Listeria_monocytogenes_1639_v81                          | Listeria_monocytogenes_1639_v47 | 0.9608 |
| Listeria_monocytogenes_1639_v80                          | Listeria_monocytogenes_1639_v47 | 0.9343 |
| Listeria_monocytogenes_1639_v7                           | Listeria_monocytogenes_1639_v47 | 0.9565 |
| Listeria_monocytogenes_1639_v79                          | Listeria_monocytogenes_1639_v47 | 0.9549 |
| Listeria_monocytogenes_1639_v78                          | Listeria_monocytogenes_1639_v47 | 0.9608 |
| Listeria_monocytogenes_1639_v77                          | Listeria_monocytogenes_1639_v47 | 0.9473 |
| Listeria_monocytogenes_1639_v76                          | Listeria_monocytogenes_1639_v47 | 0.9467 |
| Listeria_monocytogenes_1639_v75                          | Listeria_monocytogenes_1639_v47 | 0.8989 |
| Listeria_monocytogenes_1639_v74                          | Listeria_monocytogenes_1639_v47 | 0.9348 |
| Listeria_monocytogenes_1639_v73                          | Listeria_monocytogenes_1639_v47 | 0.941  |
| Listeria_monocytogenes_1639_v72                          | Listeria_monocytogenes_1639_v47 | 0.9169 |
| Listeria_monocytogenes_1639_v71                          | Listeria_monocytogenes_1639_v47 | 0.936  |
| Listeria_monocytogenes_1639_v70                          | Listeria_monocytogenes_1639_v47 | 0.9522 |
| Listeria_monocytogenes_1639_v6                           | Listeria_monocytogenes_1639_v47 | 0.9558 |
| Listeria_monocytogenes_1639_v69                          | Listeria_monocytogenes_1639_v47 | 0.9156 |
| Listeria_monocytogenes_1639_v68                          | Listeria_monocytogenes_1639_v47 | 0.9356 |
| Listeria_monocytogenes_1639_v67                          | Listeria_monocytogenes_1639_v47 | 0.9356 |
| Listeria_monocytogenes_1639_v66                          | Listeria_monocytogenes_1639_v47 | 0.9501 |
| Listeria_monocytogenes_1639_v65                          | Listeria_monocytogenes_1639_v47 | 0.9665 |
| Listeria_monocytogenes_1639_v64                          | Listeria_monocytogenes_1639_v47 | 0.9468 |
| Listeria_monocytogenes_1639_v63                          | Listeria_monocytogenes_1639_v47 | 0.9356 |
| Listeria_monocytogenes_1639_v62                          | Listeria_monocytogenes_1639_v47 | 0.9543 |
| Listeria_monocytogenes_1639_v61                          | Listeria_monocytogenes_1639_v47 | 0.9757 |
| Listeria_monocytogenes_1639_v60                          | Listeria_monocytogenes_1639_v47 | 0.9444 |
| Listeria_monocytogenes_1639_v5                           | Listeria_monocytogenes_1639_v47 | 0.8916 |
| Listeria_monocytogenes_1639_v59                          | Listeria_monocytogenes_1639_v47 | 0.9211 |
| Listeria_monocytogenes_1639_v58                          | Listeria_monocytogenes_1639_v47 | 0.917  |
| Listeria_monocytogenes_1639_v57                          | Listeria_monocytogenes_1639_v47 | 0.9175 |
| Listeria_monocytogenes_1639_v56                          | Listeria_monocytogenes_1639_v47 | 0.9237 |
| Listeria_monocytogenes_1639_v55                          | Listeria_monocytogenes_1639_v47 | 0.9149 |
| Listeria_monocytogenes_1639_v54                          | Listeria_monocytogenes_1639_v47 | 0.9161 |
| Listeria_monocytogenes_1639_v53                          | Listeria_monocytogenes_1639_v47 | 0.9315 |
| Listeria_monocytogenes_1639_v52                          | Listeria_monocytogenes_1639_v47 | 0.9236 |
| Listeria_monocytogenes_1639_v51                          | Listeria_monocytogenes_1639_v47 | 0.9145 |
| Listeria_monocytogenes_1639_v50                          | Listeria_monocytogenes_1639_v47 | 0.9938 |
| Listeria_monocytogenes_1639_v4                           | Listeria_monocytogenes_1639_v47 | 0.9023 |
| Listeria_monocytogenes_1639_v49                          | Listeria_monocytogenes_1639_v47 | 0.9116 |
| Listeria_monocytogenes_1639_v48                          | Listeria_monocytogenes_1639_v47 | 0.9475 |
| Listeria_monocytogenes_1639_v47                          | Listeria_monocytogenes_1639_v47 | 0.0675 |
| Listeria_welshimeri_1643                                 | Listeria_monocytogenes_1639_v48 | 0.8651 |
| Listeria_welshimeri_serovar_6b_str_SLCC5334_386043       | Listeria_monocytogenes_1639_v48 | 0.8648 |
| Listeria_seeligeri_serovar_1_2b_str_SLCC3954_683837      | Listeria_monocytogenes_1639_v48 | 0.8716 |
| Listeria_seeligeri_FSL_S4-171_702452                     | Listeria_monocytogenes_1639_v48 | 0.8127 |
| Listeria_seeligeri_FSL_N1-067_702453                     | Listeria_monocytogenes_1639_v48 | 0.8365 |
| Listeria_seeligeri_1640_v1                               | Listeria_monocytogenes_1639_v48 | 0.874  |
| Listeria_seeligeri_1640                                  | Listeria_monocytogenes_1639_v48 | 0.8656 |
| Listeria_monocytogenes_WSLC1042_1457188                  | Listeria_monocytogenes_1639_v48 | 0.9201 |
| Listeria_monocytogenes_WSLC1001_1457187                  | Listeria_monocytogenes_1639_v48 | 0.9505 |
| Listeria_monocytogenes_SLCC7179_879090                   | Listeria_monocytogenes_1639_v48 | 0.9433 |
| Listeria_monocytogenes_SLCC5850_882096                   | Listeria_monocytogenes_1639_v48 | 0.9514 |
| Listeria_monocytogenes_SLCC2755_932919                   | Listeria_monocytogenes_1639_v48 | 0.9177 |
| Listeria_monocytogenes_SLCC2540_879089                   | Listeria_monocytogenes_1639_v48 | 0.9386 |
| Listeria_monocytogenes_SLCC2479_882020                   | Listeria_monocytogenes_1639_v48 | 0.9793 |
| Listeria_monocytogenes_SLCC2378_879088                   | Listeria_monocytogenes_1639_v48 | 0.9211 |
| Listeria_monocytogenes_SLCC2376_882097                   | Listeria_monocytogenes_1639_v48 | 0.9265 |
| Listeria_monocytogenes_SLCC2372_932920                   | Listeria_monocytogenes_1639_v48 | 0.9718 |
| Listeria_monocytogenes_serotype_4b_str_LL195_1230340     | Listeria_monocytogenes_1639_v48 | 0.9255 |
| Listeria_monocytogenes_serotype_4b_str_LIS0087_1134669   | Listeria_monocytogenes_1639_v48 | 0.931  |
| Listeria_monocytogenes_serotype_4b_str_F2365_265669      | Listeria_monocytogenes_1639_v48 | 0.9255 |
| Listeria_monocytogenes_serotype_4b_str_CLIP_80459_568819 | Listeria_monocytogenes_1639_v48 | 0.928  |
| Listeria_monocytogenes_serotype_4b_str_81-0861_1196161   | Listeria_monocytogenes_1639_v48 | 0.9168 |
| Listeria_monocytogenes_serotype_4b_str_81-0592_1196160   | Listeria_monocytogenes_1639_v48 | 0.9178 |
| Listeria_monocytogenes_serotype_4b_str_81-0558_1196159   | Listeria_monocytogenes_1639_v48 | 0.9181 |
| Listeria_monocytogenes_serotype_4b_str_10-0809_1196162   | Listeria_monocytogenes_1639_v48 | 0.9178 |
| Listeria_monocytogenes_serotype_4b_str_02-6680_1196175   | Listeria_monocytogenes_1639_v48 | 0.9252 |
| Listeria_monocytogenes_serotype_4b_str_02-6679_1196174   | Listeria_monocytogenes_1639_v48 | 0.9252 |
| Listeria_monocytogenes_serotype_4b_str_02-1792_1196173   | Listeria_monocytogenes_1639_v48 | 0.9204 |

|                                                          |                                 |        |
|----------------------------------------------------------|---------------------------------|--------|
| Listeria_monocytogenes_serotype_4b_str_02-1289_1196172   | Listeria_monocytogenes_1639_v48 | 0.9204 |
| Listeria_monocytogenes_serotype_4b_str_02-1103_1196171   | Listeria_monocytogenes_1639_v48 | 0.9204 |
| Listeria_monocytogenes_serotype_3c_str_10-5027_1196195   | Listeria_monocytogenes_1639_v48 | 0.9915 |
| Listeria_monocytogenes_serotype_1_2c_str_10-5026_1196194 | Listeria_monocytogenes_1639_v48 | 0.9915 |
| Listeria_monocytogenes_serotype_1_2c_str_10-5025_1196193 | Listeria_monocytogenes_1639_v48 | 0.9915 |
| Listeria_monocytogenes_serotype_1_2b_str_10-0811_1196164 | Listeria_monocytogenes_1639_v48 | 0.9466 |
| Listeria_monocytogenes_serotype_1_2b_str_10-0810_1196163 | Listeria_monocytogenes_1639_v48 | 0.9466 |
| Listeria_monocytogenes_serotype_1_2a_str_99-6370_1196179 | Listeria_monocytogenes_1639_v48 | 0.9537 |
| Listeria_monocytogenes_serotype_1_2a_str_98-2035_1196178 | Listeria_monocytogenes_1639_v48 | 0.9537 |
| Listeria_monocytogenes_serotype_1_2a_str_95-0093_1196177 | Listeria_monocytogenes_1639_v48 | 0.9497 |
| Listeria_monocytogenes_serotype_1_2a_str_88-0478_1196176 | Listeria_monocytogenes_1639_v48 | 0.9479 |
| Listeria_monocytogenes_serotype_1_2a_str_10-5024_1196192 | Listeria_monocytogenes_1639_v48 | 0.9504 |
| Listeria_monocytogenes_serotype_1_2a_str_10-4758_1196168 | Listeria_monocytogenes_1639_v48 | 0.9534 |
| Listeria_monocytogenes_serotype_1_2a_str_10-4754_1196167 | Listeria_monocytogenes_1639_v48 | 0.9537 |
| Listeria_monocytogenes_serotype_1_2a_str_10-1321_1196191 | Listeria_monocytogenes_1639_v48 | 0.9504 |
| Listeria_monocytogenes_serotype_1_2a_str_10-1047_1196190 | Listeria_monocytogenes_1639_v48 | 0.9486 |
| Listeria_monocytogenes_serotype_1_2a_str_10-1046_1196189 | Listeria_monocytogenes_1639_v48 | 0.9486 |
| Listeria_monocytogenes_serotype_1_2a_str_10-0934_1196170 | Listeria_monocytogenes_1639_v48 | 0.9505 |
| Listeria_monocytogenes_serotype_1_2a_str_10-0933_1196169 | Listeria_monocytogenes_1639_v48 | 0.9505 |
| Listeria_monocytogenes_serotype_1_2a_str_10-0815_1196188 | Listeria_monocytogenes_1639_v48 | 0.9543 |
| Listeria_monocytogenes_serotype_1_2a_str_10-0814_1196187 | Listeria_monocytogenes_1639_v48 | 0.9504 |
| Listeria_monocytogenes_serotype_1_2a_str_10-0813_1196166 | Listeria_monocytogenes_1639_v48 | 0.9499 |
| Listeria_monocytogenes_serotype_1_2a_str_10-0812_1196165 | Listeria_monocytogenes_1639_v48 | 0.9499 |
| Listeria_monocytogenes_serotype_1_2a_str_08-7669_1196186 | Listeria_monocytogenes_1639_v48 | 0.944  |
| Listeria_monocytogenes_serotype_1_2a_str_08-7374_1196185 | Listeria_monocytogenes_1639_v48 | 0.9504 |
| Listeria_monocytogenes_serotype_1_2a_str_08-6997_1196184 | Listeria_monocytogenes_1639_v48 | 0.9543 |
| Listeria_monocytogenes_serotype_1_2a_str_08-6569_1196183 | Listeria_monocytogenes_1639_v48 | 0.9543 |
| Listeria_monocytogenes_serotype_1_2a_str_08-6056_1196182 | Listeria_monocytogenes_1639_v48 | 0.9543 |
| Listeria_monocytogenes_serotype_1_2a_str_04-5457_1196181 | Listeria_monocytogenes_1639_v48 | 0.9504 |
| Listeria_monocytogenes_serotype_1_2a_str_02-5993_1196180 | Listeria_monocytogenes_1639_v48 | 0.9504 |
| Listeria_monocytogenes_R479a_1437838                     | Listeria_monocytogenes_1639_v48 | 0.9512 |
| Listeria_monocytogenes_N53-1_1234142                     | Listeria_monocytogenes_1639_v48 | 0.9012 |
| Listeria_monocytogenes_M7_1030009                        | Listeria_monocytogenes_1639_v48 | 0.9036 |
| Listeria_monocytogenes_LO28_393132                       | Listeria_monocytogenes_1639_v48 | 0.976  |
| Listeria_monocytogenes_L99_563174                        | Listeria_monocytogenes_1639_v48 | 0.9039 |
| Listeria_monocytogenes_L312_882094                       | Listeria_monocytogenes_1639_v48 | 0.928  |
| Listeria_monocytogenes_J1816_930781                      | Listeria_monocytogenes_1639_v48 | 0.9218 |
| Listeria_monocytogenes_J1-220_930782                     | Listeria_monocytogenes_1639_v48 | 0.9206 |
| Listeria_monocytogenes_J0161_393130                      | Listeria_monocytogenes_1639_v48 | 0.9413 |
| Listeria_monocytogenes_HCC23_552536                      | Listeria_monocytogenes_1639_v48 | 0.9032 |
| Listeria_monocytogenes_FSL_R2-561_393126                 | Listeria_monocytogenes_1639_v48 | 0.9827 |
| Listeria_monocytogenes_FSL_J1-208_393119                 | Listeria_monocytogenes_1639_v48 | 0.8923 |
| Listeria_monocytogenes_FSL_J1-175_393118                 | Listeria_monocytogenes_1639_v48 | 0.9395 |
| Listeria_monocytogenes_Finland_1998_393127               | Listeria_monocytogenes_1639_v48 | 0.9444 |
| Listeria_monocytogenes_EGD-e_169963_v1                   | Listeria_monocytogenes_1639_v48 | 0.9638 |
| Listeria_monocytogenes_EGD-e_169963                      | Listeria_monocytogenes_1639_v48 | 0.9638 |
| Listeria_monocytogenes_EGD_1334565                       | Listeria_monocytogenes_1639_v48 | 0.9521 |
| Listeria_monocytogenes_CFSAN002349_1299895               | Listeria_monocytogenes_1639_v48 | 0.9286 |
| Listeria_monocytogenes_ATCC_19117_882095_v1              | Listeria_monocytogenes_1639_v48 | 0.9212 |
| Listeria_monocytogenes_ATCC_19117_882095                 | Listeria_monocytogenes_1639_v48 | 0.9209 |
| Listeria_monocytogenes_6179_1288295                      | Listeria_monocytogenes_1639_v48 | 0.9447 |
| Listeria_monocytogenes_1639_v9                           | Listeria_monocytogenes_1639_v48 | 0.9299 |
| Listeria_monocytogenes_1639_v99                          | Listeria_monocytogenes_1639_v48 | 0.9226 |
| Listeria_monocytogenes_1639_v98                          | Listeria_monocytogenes_1639_v48 | 0.9535 |
| Listeria_monocytogenes_1639_v97                          | Listeria_monocytogenes_1639_v48 | 0.9242 |
| Listeria_monocytogenes_1639_v96                          | Listeria_monocytogenes_1639_v48 | 0.923  |
| Listeria_monocytogenes_1639_v95                          | Listeria_monocytogenes_1639_v48 | 0.923  |
| Listeria_monocytogenes_1639_v94                          | Listeria_monocytogenes_1639_v48 | 0.9234 |
| Listeria_monocytogenes_1639_v93                          | Listeria_monocytogenes_1639_v48 | 0.9405 |
| Listeria_monocytogenes_1639_v92                          | Listeria_monocytogenes_1639_v48 | 0.9223 |
| Listeria_monocytogenes_1639_v91                          | Listeria_monocytogenes_1639_v48 | 0.9243 |
| Listeria_monocytogenes_1639_v90                          | Listeria_monocytogenes_1639_v48 | 0.9535 |
| Listeria_monocytogenes_1639_v8                           | Listeria_monocytogenes_1639_v48 | 0.938  |
| Listeria_monocytogenes_1639_v89                          | Listeria_monocytogenes_1639_v48 | 0.9254 |
| Listeria_monocytogenes_1639_v88                          | Listeria_monocytogenes_1639_v48 | 0.9548 |
| Listeria_monocytogenes_1639_v87                          | Listeria_monocytogenes_1639_v48 | 0.9498 |
| Listeria_monocytogenes_1639_v86                          | Listeria_monocytogenes_1639_v48 | 0.9494 |
| Listeria_monocytogenes_1639_v85                          | Listeria_monocytogenes_1639_v48 | 0.918  |
| Listeria_monocytogenes_1639_v84                          | Listeria_monocytogenes_1639_v48 | 0.9558 |
| Listeria_monocytogenes_1639_v83                          | Listeria_monocytogenes_1639_v48 | 0.9166 |
| Listeria_monocytogenes_1639_v82                          | Listeria_monocytogenes_1639_v48 | 0.9163 |
| Listeria_monocytogenes_1639_v81                          | Listeria_monocytogenes_1639_v48 | 0.9552 |
| Listeria_monocytogenes_1639_v80                          | Listeria_monocytogenes_1639_v48 | 0.938  |
| Listeria_monocytogenes_1639_v7                           | Listeria_monocytogenes_1639_v48 | 0.938  |
| Listeria_monocytogenes_1639_v79                          | Listeria_monocytogenes_1639_v48 | 0.9523 |
| Listeria_monocytogenes_1639_v78                          | Listeria_monocytogenes_1639_v48 | 0.9567 |
| Listeria_monocytogenes_1639_v77                          | Listeria_monocytogenes_1639_v48 | 0.9431 |
| Listeria_monocytogenes_1639_v76                          | Listeria_monocytogenes_1639_v48 | 0.9581 |
| Listeria_monocytogenes_1639_v75                          | Listeria_monocytogenes_1639_v48 | 0.9039 |
| Listeria_monocytogenes_1639_v74                          | Listeria_monocytogenes_1639_v48 | 0.9354 |
| Listeria_monocytogenes_1639_v73                          | Listeria_monocytogenes_1639_v48 | 0.9732 |
| Listeria_monocytogenes_1639_v72                          | Listeria_monocytogenes_1639_v48 | 0.9158 |
| Listeria_monocytogenes_1639_v71                          | Listeria_monocytogenes_1639_v48 | 0.9374 |
| Listeria_monocytogenes_1639_v70                          | Listeria_monocytogenes_1639_v48 | 0.9794 |
| Listeria_monocytogenes_1639_v6                           | Listeria_monocytogenes_1639_v48 | 0.9376 |
| Listeria_monocytogenes_1639_v69                          | Listeria_monocytogenes_1639_v48 | 0.9178 |
| Listeria_monocytogenes_1639_v68                          | Listeria_monocytogenes_1639_v48 | 0.94   |
| Listeria_monocytogenes_1639_v67                          | Listeria_monocytogenes_1639_v48 | 0.9403 |
| Listeria_monocytogenes_1639_v66                          | Listeria_monocytogenes_1639_v48 | 0.9523 |
| Listeria_monocytogenes_1639_v65                          | Listeria_monocytogenes_1639_v48 | 0.9569 |
| Listeria_monocytogenes_1639_v64                          | Listeria_monocytogenes_1639_v48 | 0.9541 |

|                                                          |                                 |        |
|----------------------------------------------------------|---------------------------------|--------|
| Listeria_monocytogenes_1639_v63                          | Listeria_monocytogenes_1639_v48 | 0.941  |
| Listeria_monocytogenes_1639_v62                          | Listeria_monocytogenes_1639_v48 | 0.9583 |
| Listeria_monocytogenes_1639_v61                          | Listeria_monocytogenes_1639_v48 | 0.9499 |
| Listeria_monocytogenes_1639_v60                          | Listeria_monocytogenes_1639_v48 | 0.944  |
| Listeria_monocytogenes_1639_v5                           | Listeria_monocytogenes_1639_v48 | 0.9018 |
| Listeria_monocytogenes_1639_v59                          | Listeria_monocytogenes_1639_v48 | 0.9206 |
| Listeria_monocytogenes_1639_v58                          | Listeria_monocytogenes_1639_v48 | 0.9228 |
| Listeria_monocytogenes_1639_v57                          | Listeria_monocytogenes_1639_v48 | 0.9186 |
| Listeria_monocytogenes_1639_v56                          | Listeria_monocytogenes_1639_v48 | 0.9225 |
| Listeria_monocytogenes_1639_v55                          | Listeria_monocytogenes_1639_v48 | 0.917  |
| Listeria_monocytogenes_1639_v54                          | Listeria_monocytogenes_1639_v48 | 0.9175 |
| Listeria_monocytogenes_1639_v53                          | Listeria_monocytogenes_1639_v48 | 0.9344 |
| Listeria_monocytogenes_1639_v52                          | Listeria_monocytogenes_1639_v48 | 0.9205 |
| Listeria_monocytogenes_1639_v51                          | Listeria_monocytogenes_1639_v48 | 0.9126 |
| Listeria_monocytogenes_1639_v50                          | Listeria_monocytogenes_1639_v48 | 0.949  |
| Listeria_monocytogenes_1639_v4                           | Listeria_monocytogenes_1639_v48 | 0.9144 |
| Listeria_monocytogenes_1639_v49                          | Listeria_monocytogenes_1639_v48 | 0.9153 |
| Listeria_monocytogenes_1639_v48                          | Listeria_monocytogenes_1639_v48 | 0.0716 |
| Listeria_welshimeri_1643                                 | Listeria_monocytogenes_1639_v49 | 0.8812 |
| Listeria_welshimeri_serovar_6b_str_SLCC5334_386043       | Listeria_monocytogenes_1639_v49 | 0.8805 |
| Listeria_seeligeri_serovar_1_2b_str_SLCC3954_683837      | Listeria_monocytogenes_1639_v49 | 0.8734 |
| Listeria_seeligeri_FSL_S4-171_702452                     | Listeria_monocytogenes_1639_v49 | 0.8178 |
| Listeria_seeligeri_FSL_N1-067_702453                     | Listeria_monocytogenes_1639_v49 | 0.824  |
| Listeria_seeligeri_1640_v1                               | Listeria_monocytogenes_1639_v49 | 0.8845 |
| Listeria_seeligeri_1640                                  | Listeria_monocytogenes_1639_v49 | 0.8736 |
| Listeria_monocytogenes_WSLC1042_1457188                  | Listeria_monocytogenes_1639_v49 | 0.9827 |
| Listeria_monocytogenes_WSLC1001_1457187                  | Listeria_monocytogenes_1639_v49 | 0.9209 |
| Listeria_monocytogenes_SLCC7179_879090                   | Listeria_monocytogenes_1639_v49 | 0.9274 |
| Listeria_monocytogenes_SLCC5850_882096                   | Listeria_monocytogenes_1639_v49 | 0.9247 |
| Listeria_monocytogenes_SLCC2755_932919                   | Listeria_monocytogenes_1639_v49 | 0.9384 |
| Listeria_monocytogenes_SLCC2540_879089                   | Listeria_monocytogenes_1639_v49 | 0.9453 |
| Listeria_monocytogenes_SLCC2479_882020                   | Listeria_monocytogenes_1639_v49 | 0.9207 |
| Listeria_monocytogenes_SLCC2378_879088                   | Listeria_monocytogenes_1639_v49 | 0.9842 |
| Listeria_monocytogenes_SLCC2376_882097                   | Listeria_monocytogenes_1639_v49 | 0.9294 |
| Listeria_monocytogenes_SLCC2372_932920                   | Listeria_monocytogenes_1639_v49 | 0.9136 |
| Listeria_monocytogenes_serotype_4b_str_LL195_1230340     | Listeria_monocytogenes_1639_v49 | 0.9807 |
| Listeria_monocytogenes_serotype_4b_str_LIS0087_1134669   | Listeria_monocytogenes_1639_v49 | 0.9001 |
| Listeria_monocytogenes_serotype_4b_str_F2365_265669      | Listeria_monocytogenes_1639_v49 | 0.9807 |
| Listeria_monocytogenes_serotype_4b_str_CLIP_80459_568819 | Listeria_monocytogenes_1639_v49 | 0.962  |
| Listeria_monocytogenes_serotype_4b_str_81-0861_1196161   | Listeria_monocytogenes_1639_v49 | 0.9743 |
| Listeria_monocytogenes_serotype_4b_str_81-0592_1196160   | Listeria_monocytogenes_1639_v49 | 0.9754 |
| Listeria_monocytogenes_serotype_4b_str_81-0558_1196159   | Listeria_monocytogenes_1639_v49 | 0.9765 |
| Listeria_monocytogenes_serotype_4b_str_10-0809_1196162   | Listeria_monocytogenes_1639_v49 | 0.9758 |
| Listeria_monocytogenes_serotype_4b_str_02-6680_1196175   | Listeria_monocytogenes_1639_v49 | 0.9621 |
| Listeria_monocytogenes_serotype_4b_str_02-6679_1196174   | Listeria_monocytogenes_1639_v49 | 0.9621 |
| Listeria_monocytogenes_serotype_4b_str_02-1792_1196173   | Listeria_monocytogenes_1639_v49 | 0.9761 |
| Listeria_monocytogenes_serotype_4b_str_02-1289_1196172   | Listeria_monocytogenes_1639_v49 | 0.9761 |
| Listeria_monocytogenes_serotype_4b_str_02-1103_1196171   | Listeria_monocytogenes_1639_v49 | 0.9761 |
| Listeria_monocytogenes_serotype_3c_str_10-5027_1196195   | Listeria_monocytogenes_1639_v49 | 0.9196 |
| Listeria_monocytogenes_serotype_1_2c_str_10-5026_1196194 | Listeria_monocytogenes_1639_v49 | 0.9207 |
| Listeria_monocytogenes_serotype_1_2c_str_10-5025_1196193 | Listeria_monocytogenes_1639_v49 | 0.9207 |
| Listeria_monocytogenes_serotype_1_2b_str_10-0811_1196164 | Listeria_monocytogenes_1639_v49 | 0.9333 |
| Listeria_monocytogenes_serotype_1_2b_str_10-0810_1196163 | Listeria_monocytogenes_1639_v49 | 0.9333 |
| Listeria_monocytogenes_serotype_1_2a_str_99-6370_1196179 | Listeria_monocytogenes_1639_v49 | 0.9074 |
| Listeria_monocytogenes_serotype_1_2a_str_98-2035_1196178 | Listeria_monocytogenes_1639_v49 | 0.9074 |
| Listeria_monocytogenes_serotype_1_2a_str_95-0093_1196177 | Listeria_monocytogenes_1639_v49 | 0.912  |
| Listeria_monocytogenes_serotype_1_2a_str_88-0478_1196176 | Listeria_monocytogenes_1639_v49 | 0.9108 |
| Listeria_monocytogenes_serotype_1_2a_str_10-5024_1196192 | Listeria_monocytogenes_1639_v49 | 0.9124 |
| Listeria_monocytogenes_serotype_1_2a_str_10-4758_1196168 | Listeria_monocytogenes_1639_v49 | 0.9289 |
| Listeria_monocytogenes_serotype_1_2a_str_10-4754_1196167 | Listeria_monocytogenes_1639_v49 | 0.9289 |
| Listeria_monocytogenes_serotype_1_2a_str_10-1321_1196191 | Listeria_monocytogenes_1639_v49 | 0.9124 |
| Listeria_monocytogenes_serotype_1_2a_str_10-1047_1196190 | Listeria_monocytogenes_1639_v49 | 0.9123 |
| Listeria_monocytogenes_serotype_1_2a_str_10-1046_1196189 | Listeria_monocytogenes_1639_v49 | 0.9123 |
| Listeria_monocytogenes_serotype_1_2a_str_10-0934_1196170 | Listeria_monocytogenes_1639_v49 | 0.9326 |
| Listeria_monocytogenes_serotype_1_2a_str_10-0933_1196169 | Listeria_monocytogenes_1639_v49 | 0.9326 |
| Listeria_monocytogenes_serotype_1_2a_str_10-0815_1196188 | Listeria_monocytogenes_1639_v49 | 0.9084 |
| Listeria_monocytogenes_serotype_1_2a_str_10-0814_1196187 | Listeria_monocytogenes_1639_v49 | 0.9124 |
| Listeria_monocytogenes_serotype_1_2a_str_10-0813_1196166 | Listeria_monocytogenes_1639_v49 | 0.9171 |
| Listeria_monocytogenes_serotype_1_2a_str_10-0812_1196165 | Listeria_monocytogenes_1639_v49 | 0.9171 |
| Listeria_monocytogenes_serotype_1_2a_str_08-7669_1196186 | Listeria_monocytogenes_1639_v49 | 0.9182 |
| Listeria_monocytogenes_serotype_1_2a_str_08-7374_1196185 | Listeria_monocytogenes_1639_v49 | 0.9124 |
| Listeria_monocytogenes_serotype_1_2a_str_08-6997_1196184 | Listeria_monocytogenes_1639_v49 | 0.9084 |
| Listeria_monocytogenes_serotype_1_2a_str_08-6569_1196183 | Listeria_monocytogenes_1639_v49 | 0.9084 |
| Listeria_monocytogenes_serotype_1_2a_str_08-6056_1196182 | Listeria_monocytogenes_1639_v49 | 0.9084 |
| Listeria_monocytogenes_serotype_1_2a_str_04-5457_1196181 | Listeria_monocytogenes_1639_v49 | 0.9124 |
| Listeria_monocytogenes_serotype_1_2a_str_02-5993_1196180 | Listeria_monocytogenes_1639_v49 | 0.912  |
| Listeria_monocytogenes_R479a_1437838                     | Listeria_monocytogenes_1639_v49 | 0.9106 |
| Listeria_monocytogenes_N53-1_1234142                     | Listeria_monocytogenes_1639_v49 | 0.882  |
| Listeria_monocytogenes_M7_1030009                        | Listeria_monocytogenes_1639_v49 | 0.914  |
| Listeria_monocytogenes_LO28_393132                       | Listeria_monocytogenes_1639_v49 | 0.9194 |
| Listeria_monocytogenes_L99_563174                        | Listeria_monocytogenes_1639_v49 | 0.9147 |
| Listeria_monocytogenes_L312_882094                       | Listeria_monocytogenes_1639_v49 | 0.9624 |
| Listeria_monocytogenes_J1816_930781                      | Listeria_monocytogenes_1639_v49 | 0.9398 |
| Listeria_monocytogenes_J1-220_930782                     | Listeria_monocytogenes_1639_v49 | 0.956  |
| Listeria_monocytogenes_J0161_393130                      | Listeria_monocytogenes_1639_v49 | 0.9156 |
| Listeria_monocytogenes_HCC23_552536                      | Listeria_monocytogenes_1639_v49 | 0.914  |
| Listeria_monocytogenes_FSL_R2-561_393126                 | Listeria_monocytogenes_1639_v49 | 0.9193 |
| Listeria_monocytogenes_FSL_J1-208_393119                 | Listeria_monocytogenes_1639_v49 | 0.9104 |
| Listeria_monocytogenes_FSL_J1-175_393118                 | Listeria_monocytogenes_1639_v49 | 0.9462 |
| Listeria_monocytogenes_Finland_1998_393127               | Listeria_monocytogenes_1639_v49 | 0.9322 |
| Listeria_monocytogenes_EGD-e_169963_v1                   | Listeria_monocytogenes_1639_v49 | 0.9291 |

|                                                          |                                 |        |
|----------------------------------------------------------|---------------------------------|--------|
| Listeria_monocytogenes_EGD-e_169963                      | Listeria_monocytogenes_1639_v49 | 0.9294 |
| Listeria_monocytogenes_EGD_1334565                       | Listeria_monocytogenes_1639_v49 | 0.9254 |
| Listeria_monocytogenes_CFSAN002349_1299895               | Listeria_monocytogenes_1639_v49 | 0.9607 |
| Listeria_monocytogenes_ATCC_19117_882095_v1              | Listeria_monocytogenes_1639_v49 | 0.9694 |
| Listeria_monocytogenes_ATCC_19117_882095                 | Listeria_monocytogenes_1639_v49 | 0.9694 |
| Listeria_monocytogenes_6179_1288295                      | Listeria_monocytogenes_1639_v49 | 0.9036 |
| Listeria_monocytogenes_1639_v9                           | Listeria_monocytogenes_1639_v49 | 0.9178 |
| Listeria_monocytogenes_1639_v99                          | Listeria_monocytogenes_1639_v49 | 0.9413 |
| Listeria_monocytogenes_1639_v98                          | Listeria_monocytogenes_1639_v49 | 0.9137 |
| Listeria_monocytogenes_1639_v97                          | Listeria_monocytogenes_1639_v49 | 0.9543 |
| Listeria_monocytogenes_1639_v96                          | Listeria_monocytogenes_1639_v49 | 0.9403 |
| Listeria_monocytogenes_1639_v95                          | Listeria_monocytogenes_1639_v49 | 0.9403 |
| Listeria_monocytogenes_1639_v94                          | Listeria_monocytogenes_1639_v49 | 0.9403 |
| Listeria_monocytogenes_1639_v93                          | Listeria_monocytogenes_1639_v49 | 0.9153 |
| Listeria_monocytogenes_1639_v92                          | Listeria_monocytogenes_1639_v49 | 0.9417 |
| Listeria_monocytogenes_1639_v91                          | Listeria_monocytogenes_1639_v49 | 0.9699 |
| Listeria_monocytogenes_1639_v90                          | Listeria_monocytogenes_1639_v49 | 0.9137 |
| Listeria_monocytogenes_1639_v8                           | Listeria_monocytogenes_1639_v49 | 0.9046 |
| Listeria_monocytogenes_1639_v89                          | Listeria_monocytogenes_1639_v49 | 0.9515 |
| Listeria_monocytogenes_1639_v88                          | Listeria_monocytogenes_1639_v49 | 0.9187 |
| Listeria_monocytogenes_1639_v87                          | Listeria_monocytogenes_1639_v49 | 0.9138 |
| Listeria_monocytogenes_1639_v86                          | Listeria_monocytogenes_1639_v49 | 0.913  |
| Listeria_monocytogenes_1639_v85                          | Listeria_monocytogenes_1639_v49 | 0.9736 |
| Listeria_monocytogenes_1639_v84                          | Listeria_monocytogenes_1639_v49 | 0.9229 |
| Listeria_monocytogenes_1639_v83                          | Listeria_monocytogenes_1639_v49 | 0.96   |
| Listeria_monocytogenes_1639_v82                          | Listeria_monocytogenes_1639_v49 | 0.9593 |
| Listeria_monocytogenes_1639_v81                          | Listeria_monocytogenes_1639_v49 | 0.9175 |
| Listeria_monocytogenes_1639_v80                          | Listeria_monocytogenes_1639_v49 | 0.9371 |
| Listeria_monocytogenes_1639_v7                           | Listeria_monocytogenes_1639_v49 | 0.9046 |
| Listeria_monocytogenes_1639_v79                          | Listeria_monocytogenes_1639_v49 | 0.9155 |
| Listeria_monocytogenes_1639_v78                          | Listeria_monocytogenes_1639_v49 | 0.9168 |
| Listeria_monocytogenes_1639_v77                          | Listeria_monocytogenes_1639_v49 | 0.9225 |
| Listeria_monocytogenes_1639_v76                          | Listeria_monocytogenes_1639_v49 | 0.9137 |
| Listeria_monocytogenes_1639_v75                          | Listeria_monocytogenes_1639_v49 | 0.9147 |
| Listeria_monocytogenes_1639_v74                          | Listeria_monocytogenes_1639_v49 | 0.9082 |
| Listeria_monocytogenes_1639_v73                          | Listeria_monocytogenes_1639_v49 | 0.9146 |
| Listeria_monocytogenes_1639_v72                          | Listeria_monocytogenes_1639_v49 | 0.9589 |
| Listeria_monocytogenes_1639_v71                          | Listeria_monocytogenes_1639_v49 | 0.9019 |
| Listeria_monocytogenes_1639_v70                          | Listeria_monocytogenes_1639_v49 | 0.9173 |
| Listeria_monocytogenes_1639_v6                           | Listeria_monocytogenes_1639_v49 | 0.904  |
| Listeria_monocytogenes_1639_v69                          | Listeria_monocytogenes_1639_v49 | 0.9758 |
| Listeria_monocytogenes_1639_v68                          | Listeria_monocytogenes_1639_v49 | 0.9279 |
| Listeria_monocytogenes_1639_v67                          | Listeria_monocytogenes_1639_v49 | 0.9377 |
| Listeria_monocytogenes_1639_v66                          | Listeria_monocytogenes_1639_v49 | 0.9253 |
| Listeria_monocytogenes_1639_v65                          | Listeria_monocytogenes_1639_v49 | 0.9147 |
| Listeria_monocytogenes_1639_v64                          | Listeria_monocytogenes_1639_v49 | 0.9214 |
| Listeria_monocytogenes_1639_v63                          | Listeria_monocytogenes_1639_v49 | 0.9351 |
| Listeria_monocytogenes_1639_v62                          | Listeria_monocytogenes_1639_v49 | 0.913  |
| Listeria_monocytogenes_1639_v61                          | Listeria_monocytogenes_1639_v49 | 0.918  |
| Listeria_monocytogenes_1639_v60                          | Listeria_monocytogenes_1639_v49 | 0.9178 |
| Listeria_monocytogenes_1639_v5                           | Listeria_monocytogenes_1639_v49 | 0.8993 |
| Listeria_monocytogenes_1639_v59                          | Listeria_monocytogenes_1639_v49 | 0.9656 |
| Listeria_monocytogenes_1639_v58                          | Listeria_monocytogenes_1639_v49 | 0.9679 |
| Listeria_monocytogenes_1639_v57                          | Listeria_monocytogenes_1639_v49 | 0.9375 |
| Listeria_monocytogenes_1639_v56                          | Listeria_monocytogenes_1639_v49 | 0.9608 |
| Listeria_monocytogenes_1639_v55                          | Listeria_monocytogenes_1639_v49 | 0.9352 |
| Listeria_monocytogenes_1639_v54                          | Listeria_monocytogenes_1639_v49 | 0.9135 |
| Listeria_monocytogenes_1639_v53                          | Listeria_monocytogenes_1639_v49 | 0.9216 |
| Listeria_monocytogenes_1639_v52                          | Listeria_monocytogenes_1639_v49 | 0.9523 |
| Listeria_monocytogenes_1639_v51                          | Listeria_monocytogenes_1639_v49 | 0.9551 |
| Listeria_monocytogenes_1639_v50                          | Listeria_monocytogenes_1639_v49 | 0.9116 |
| Listeria_monocytogenes_1639_v4                           | Listeria_monocytogenes_1639_v49 | 0.912  |
| Listeria_monocytogenes_1639_v49                          | Listeria_monocytogenes_1639_v49 | 0.0682 |
| Listeria_welshimeri_1643                                 | Listeria_monocytogenes_1639_v4  | 0.8437 |
| Listeria_welshimeri_serovar_6b_str_SLCC5334_386043       | Listeria_monocytogenes_1639_v4  | 0.8433 |
| Listeria_seeligeri_serovar_1_2b_str_SLCC3954_683837      | Listeria_monocytogenes_1639_v4  | 0.8554 |
| Listeria_seeligeri_FSL_S4-171_702452                     | Listeria_monocytogenes_1639_v4  | 0.7952 |
| Listeria_seeligeri_FSL_N1-067_702453                     | Listeria_monocytogenes_1639_v4  | 0.8092 |
| Listeria_seeligeri_1640_v1                               | Listeria_monocytogenes_1639_v4  | 0.8582 |
| Listeria_seeligeri_1640                                  | Listeria_monocytogenes_1639_v4  | 0.8735 |
| Listeria_monocytogenes_WSLC1042_1457188                  | Listeria_monocytogenes_1639_v4  | 0.9174 |
| Listeria_monocytogenes_WSLC1001_1457187                  | Listeria_monocytogenes_1639_v4  | 0.9046 |
| Listeria_monocytogenes_SLCC7179_879090                   | Listeria_monocytogenes_1639_v4  | 0.9177 |
| Listeria_monocytogenes_SLCC5850_882096                   | Listeria_monocytogenes_1639_v4  | 0.9086 |
| Listeria_monocytogenes_SLCC2755_932919                   | Listeria_monocytogenes_1639_v4  | 0.9438 |
| Listeria_monocytogenes_SLCC2540_879089                   | Listeria_monocytogenes_1639_v4  | 0.9224 |
| Listeria_monocytogenes_SLCC2479_882020                   | Listeria_monocytogenes_1639_v4  | 0.9081 |
| Listeria_monocytogenes_SLCC2378_879088                   | Listeria_monocytogenes_1639_v4  | 0.9184 |
| Listeria_monocytogenes_SLCC2376_882097                   | Listeria_monocytogenes_1639_v4  | 0.905  |
| Listeria_monocytogenes_SLCC2372_932920                   | Listeria_monocytogenes_1639_v4  | 0.9153 |
| Listeria_monocytogenes_serotype_4b_str_LL195_1230340     | Listeria_monocytogenes_1639_v4  | 0.9234 |
| Listeria_monocytogenes_serotype_4b_str_LIS0087_1134669   | Listeria_monocytogenes_1639_v4  | 0.8978 |
| Listeria_monocytogenes_serotype_4b_str_F2365_265669      | Listeria_monocytogenes_1639_v4  | 0.9234 |
| Listeria_monocytogenes_serotype_4b_str_CLIP_80459_568819 | Listeria_monocytogenes_1639_v4  | 0.924  |
| Listeria_monocytogenes_serotype_4b_str_81-0861_1196161   | Listeria_monocytogenes_1639_v4  | 0.921  |
| Listeria_monocytogenes_serotype_4b_str_81-0592_1196160   | Listeria_monocytogenes_1639_v4  | 0.9221 |
| Listeria_monocytogenes_serotype_4b_str_81-0558_1196159   | Listeria_monocytogenes_1639_v4  | 0.9213 |
| Listeria_monocytogenes_serotype_4b_str_10-0809_1196162   | Listeria_monocytogenes_1639_v4  | 0.9224 |
| Listeria_monocytogenes_serotype_4b_str_02-6680_1196175   | Listeria_monocytogenes_1639_v4  | 0.9201 |
| Listeria_monocytogenes_serotype_4b_str_02-6679_1196174   | Listeria_monocytogenes_1639_v4  | 0.9201 |
| Listeria_monocytogenes_serotype_4b_str_02-1792_1196173   | Listeria_monocytogenes_1639_v4  | 0.9228 |

|                                                          |                                |        |
|----------------------------------------------------------|--------------------------------|--------|
| Listeria_monocytogenes_serotype_4b_str_02-1289_1196172   | Listeria_monocytogenes_1639_v4 | 0.9228 |
| Listeria_monocytogenes_serotype_4b_str_02-1103_1196171   | Listeria_monocytogenes_1639_v4 | 0.9228 |
| Listeria_monocytogenes_serotype_3c_str_10-5027_1196195   | Listeria_monocytogenes_1639_v4 | 0.9095 |
| Listeria_monocytogenes_serotype_1_2c_str_10-5026_1196194 | Listeria_monocytogenes_1639_v4 | 0.9103 |
| Listeria_monocytogenes_serotype_1_2c_str_10-5025_1196193 | Listeria_monocytogenes_1639_v4 | 0.9103 |
| Listeria_monocytogenes_serotype_1_2b_str_10-0811_1196164 | Listeria_monocytogenes_1639_v4 | 0.9517 |
| Listeria_monocytogenes_serotype_1_2b_str_10-0810_1196163 | Listeria_monocytogenes_1639_v4 | 0.9517 |
| Listeria_monocytogenes_serotype_1_2a_str_99-6370_1196179 | Listeria_monocytogenes_1639_v4 | 0.9064 |
| Listeria_monocytogenes_serotype_1_2a_str_98-2035_1196178 | Listeria_monocytogenes_1639_v4 | 0.9064 |
| Listeria_monocytogenes_serotype_1_2a_str_95-0093_1196177 | Listeria_monocytogenes_1639_v4 | 0.9022 |
| Listeria_monocytogenes_serotype_1_2a_str_88-0478_1196176 | Listeria_monocytogenes_1639_v4 | 0.9004 |
| Listeria_monocytogenes_serotype_1_2a_str_10-5024_1196192 | Listeria_monocytogenes_1639_v4 | 0.9022 |
| Listeria_monocytogenes_serotype_1_2a_str_10-4758_1196168 | Listeria_monocytogenes_1639_v4 | 0.9098 |
| Listeria_monocytogenes_serotype_1_2a_str_10-4754_1196167 | Listeria_monocytogenes_1639_v4 | 0.9101 |
| Listeria_monocytogenes_serotype_1_2a_str_10-1321_1196191 | Listeria_monocytogenes_1639_v4 | 0.9022 |
| Listeria_monocytogenes_serotype_1_2a_str_10-1047_1196190 | Listeria_monocytogenes_1639_v4 | 0.9025 |
| Listeria_monocytogenes_serotype_1_2a_str_10-1046_1196189 | Listeria_monocytogenes_1639_v4 | 0.9025 |
| Listeria_monocytogenes_serotype_1_2a_str_10-0934_1196170 | Listeria_monocytogenes_1639_v4 | 0.9138 |
| Listeria_monocytogenes_serotype_1_2a_str_10-0933_1196169 | Listeria_monocytogenes_1639_v4 | 0.9138 |
| Listeria_monocytogenes_serotype_1_2a_str_10-0815_1196188 | Listeria_monocytogenes_1639_v4 | 0.9066 |
| Listeria_monocytogenes_serotype_1_2a_str_10-0814_1196187 | Listeria_monocytogenes_1639_v4 | 0.9026 |
| Listeria_monocytogenes_serotype_1_2a_str_10-0813_1196166 | Listeria_monocytogenes_1639_v4 | 0.9136 |
| Listeria_monocytogenes_serotype_1_2a_str_10-0812_1196165 | Listeria_monocytogenes_1639_v4 | 0.9136 |
| Listeria_monocytogenes_serotype_1_2a_str_08-7669_1196186 | Listeria_monocytogenes_1639_v4 | 0.9081 |
| Listeria_monocytogenes_serotype_1_2a_str_08-7374_1196185 | Listeria_monocytogenes_1639_v4 | 0.9022 |
| Listeria_monocytogenes_serotype_1_2a_str_08-6997_1196184 | Listeria_monocytogenes_1639_v4 | 0.9066 |
| Listeria_monocytogenes_serotype_1_2a_str_08-6569_1196183 | Listeria_monocytogenes_1639_v4 | 0.9066 |
| Listeria_monocytogenes_serotype_1_2a_str_08-6056_1196182 | Listeria_monocytogenes_1639_v4 | 0.9066 |
| Listeria_monocytogenes_serotype_1_2a_str_04-5457_1196181 | Listeria_monocytogenes_1639_v4 | 0.9022 |
| Listeria_monocytogenes_serotype_1_2a_str_02-5993_1196180 | Listeria_monocytogenes_1639_v4 | 0.9022 |
| Listeria_monocytogenes_R479a_1437838                     | Listeria_monocytogenes_1639_v4 | 0.9073 |
| Listeria_monocytogenes_N53-1_1234142                     | Listeria_monocytogenes_1639_v4 | 0.8725 |
| Listeria_monocytogenes_M7_1030009                        | Listeria_monocytogenes_1639_v4 | 0.8866 |
| Listeria_monocytogenes_LO28_393132                       | Listeria_monocytogenes_1639_v4 | 0.914  |
| Listeria_monocytogenes_L99_563174                        | Listeria_monocytogenes_1639_v4 | 0.8869 |
| Listeria_monocytogenes_L312_882094                       | Listeria_monocytogenes_1639_v4 | 0.9244 |
| Listeria_monocytogenes_J1816_930781                      | Listeria_monocytogenes_1639_v4 | 0.9148 |
| Listeria_monocytogenes_J1-220_930782                     | Listeria_monocytogenes_1639_v4 | 0.9169 |
| Listeria_monocytogenes_J0161_393130                      | Listeria_monocytogenes_1639_v4 | 0.914  |
| Listeria_monocytogenes_HCC23_552536                      | Listeria_monocytogenes_1639_v4 | 0.8862 |
| Listeria_monocytogenes_FSL_R2-561_393126                 | Listeria_monocytogenes_1639_v4 | 0.9075 |
| Listeria_monocytogenes_FSL_J1-208_393119                 | Listeria_monocytogenes_1639_v4 | 0.8763 |
| Listeria_monocytogenes_FSL_J1-175_393118                 | Listeria_monocytogenes_1639_v4 | 0.9243 |
| Listeria_monocytogenes_Finland_1998_393127               | Listeria_monocytogenes_1639_v4 | 0.9149 |
| Listeria_monocytogenes_EGD-e_169963_v1                   | Listeria_monocytogenes_1639_v4 | 0.9197 |
| Listeria_monocytogenes_EGD-e_169963                      | Listeria_monocytogenes_1639_v4 | 0.9201 |
| Listeria_monocytogenes_EGD_1334565                       | Listeria_monocytogenes_1639_v4 | 0.9093 |
| Listeria_monocytogenes_CFSAN002349_1299895               | Listeria_monocytogenes_1639_v4 | 0.9257 |
| Listeria_monocytogenes_ATCC_19117_882095_v1              | Listeria_monocytogenes_1639_v4 | 0.9203 |
| Listeria_monocytogenes_ATCC_19117_882095                 | Listeria_monocytogenes_1639_v4 | 0.92   |
| Listeria_monocytogenes_6179_1288295                      | Listeria_monocytogenes_1639_v4 | 0.9084 |
| Listeria_monocytogenes_1639_v9                           | Listeria_monocytogenes_1639_v4 | 0.9349 |
| Listeria_monocytogenes_1639_v99                          | Listeria_monocytogenes_1639_v4 | 0.9239 |
| Listeria_monocytogenes_1639_v98                          | Listeria_monocytogenes_1639_v4 | 0.9212 |
| Listeria_monocytogenes_1639_v97                          | Listeria_monocytogenes_1639_v4 | 0.9174 |
| Listeria_monocytogenes_1639_v96                          | Listeria_monocytogenes_1639_v4 | 0.9235 |
| Listeria_monocytogenes_1639_v95                          | Listeria_monocytogenes_1639_v4 | 0.9232 |
| Listeria_monocytogenes_1639_v94                          | Listeria_monocytogenes_1639_v4 | 0.9235 |
| Listeria_monocytogenes_1639_v93                          | Listeria_monocytogenes_1639_v4 | 0.9083 |
| Listeria_monocytogenes_1639_v92                          | Listeria_monocytogenes_1639_v4 | 0.9239 |
| Listeria_monocytogenes_1639_v91                          | Listeria_monocytogenes_1639_v4 | 0.919  |
| Listeria_monocytogenes_1639_v90                          | Listeria_monocytogenes_1639_v4 | 0.9212 |
| Listeria_monocytogenes_1639_v8                           | Listeria_monocytogenes_1639_v4 | 0.9169 |
| Listeria_monocytogenes_1639_v89                          | Listeria_monocytogenes_1639_v4 | 0.928  |
| Listeria_monocytogenes_1639_v88                          | Listeria_monocytogenes_1639_v4 | 0.9083 |
| Listeria_monocytogenes_1639_v87                          | Listeria_monocytogenes_1639_v4 | 0.909  |
| Listeria_monocytogenes_1639_v86                          | Listeria_monocytogenes_1639_v4 | 0.909  |
| Listeria_monocytogenes_1639_v85                          | Listeria_monocytogenes_1639_v4 | 0.9222 |
| Listeria_monocytogenes_1639_v84                          | Listeria_monocytogenes_1639_v4 | 0.9077 |
| Listeria_monocytogenes_1639_v83                          | Listeria_monocytogenes_1639_v4 | 0.9245 |
| Listeria_monocytogenes_1639_v82                          | Listeria_monocytogenes_1639_v4 | 0.9242 |
| Listeria_monocytogenes_1639_v81                          | Listeria_monocytogenes_1639_v4 | 0.9061 |
| Listeria_monocytogenes_1639_v80                          | Listeria_monocytogenes_1639_v4 | 0.9487 |
| Listeria_monocytogenes_1639_v7                           | Listeria_monocytogenes_1639_v4 | 0.9169 |
| Listeria_monocytogenes_1639_v79                          | Listeria_monocytogenes_1639_v4 | 0.9048 |
| Listeria_monocytogenes_1639_v78                          | Listeria_monocytogenes_1639_v4 | 0.9061 |
| Listeria_monocytogenes_1639_v77                          | Listeria_monocytogenes_1639_v4 | 0.9039 |
| Listeria_monocytogenes_1639_v76                          | Listeria_monocytogenes_1639_v4 | 0.9111 |
| Listeria_monocytogenes_1639_v75                          | Listeria_monocytogenes_1639_v4 | 0.8869 |
| Listeria_monocytogenes_1639_v74                          | Listeria_monocytogenes_1639_v4 | 0.9093 |
| Listeria_monocytogenes_1639_v73                          | Listeria_monocytogenes_1639_v4 | 0.9184 |
| Listeria_monocytogenes_1639_v72                          | Listeria_monocytogenes_1639_v4 | 0.9194 |
| Listeria_monocytogenes_1639_v71                          | Listeria_monocytogenes_1639_v4 | 0.8967 |
| Listeria_monocytogenes_1639_v70                          | Listeria_monocytogenes_1639_v4 | 0.9088 |
| Listeria_monocytogenes_1639_v6                           | Listeria_monocytogenes_1639_v4 | 0.9165 |
| Listeria_monocytogenes_1639_v69                          | Listeria_monocytogenes_1639_v4 | 0.9221 |
| Listeria_monocytogenes_1639_v68                          | Listeria_monocytogenes_1639_v4 | 0.9122 |
| Listeria_monocytogenes_1639_v67                          | Listeria_monocytogenes_1639_v4 | 0.9242 |
| Listeria_monocytogenes_1639_v66                          | Listeria_monocytogenes_1639_v4 | 0.9066 |
| Listeria_monocytogenes_1639_v65                          | Listeria_monocytogenes_1639_v4 | 0.9182 |
| Listeria_monocytogenes_1639_v64                          | Listeria_monocytogenes_1639_v4 | 0.908  |

|                                                          |                                 |        |
|----------------------------------------------------------|---------------------------------|--------|
| Listeria_monocytogenes_1639_v63                          | Listeria_monocytogenes_1639_v4  | 0.9408 |
| Listeria_monocytogenes_1639_v62                          | Listeria_monocytogenes_1639_v4  | 0.9126 |
| Listeria_monocytogenes_1639_v61                          | Listeria_monocytogenes_1639_v4  | 0.9066 |
| Listeria_monocytogenes_1639_v60                          | Listeria_monocytogenes_1639_v4  | 0.9089 |
| Listeria_monocytogenes_1639_v5                           | Listeria_monocytogenes_1639_v4  | 0.984  |
| Listeria_monocytogenes_1639_v59                          | Listeria_monocytogenes_1639_v4  | 0.9147 |
| Listeria_monocytogenes_1639_v58                          | Listeria_monocytogenes_1639_v4  | 0.9245 |
| Listeria_monocytogenes_1639_v57                          | Listeria_monocytogenes_1639_v4  | 0.9335 |
| Listeria_monocytogenes_1639_v56                          | Listeria_monocytogenes_1639_v4  | 0.9176 |
| Listeria_monocytogenes_1639_v55                          | Listeria_monocytogenes_1639_v4  | 0.923  |
| Listeria_monocytogenes_1639_v54                          | Listeria_monocytogenes_1639_v4  | 0.8914 |
| Listeria_monocytogenes_1639_v53                          | Listeria_monocytogenes_1639_v4  | 0.902  |
| Listeria_monocytogenes_1639_v52                          | Listeria_monocytogenes_1639_v4  | 0.9215 |
| Listeria_monocytogenes_1639_v51                          | Listeria_monocytogenes_1639_v4  | 0.9271 |
| Listeria_monocytogenes_1639_v50                          | Listeria_monocytogenes_1639_v4  | 0.9012 |
| Listeria_monocytogenes_1639_v4                           | Listeria_monocytogenes_1639_v4  | 0.0715 |
| Listeria_welshimeri_1643                                 | Listeria_monocytogenes_1639_v50 | 0.8633 |
| Listeria_welshimeri_serovar_6b_str_SLCC5334_386043       | Listeria_monocytogenes_1639_v50 | 0.8626 |
| Listeria_seeligeri_serovar_1_2b_str_SLCC3954_683837      | Listeria_monocytogenes_1639_v50 | 0.8694 |
| Listeria_seeligeri_FSL_S4-171_702452                     | Listeria_monocytogenes_1639_v50 | 0.8104 |
| Listeria_seeligeri_FSL_N1-067_702453                     | Listeria_monocytogenes_1639_v50 | 0.8313 |
| Listeria_seeligeri_1640_v1                               | Listeria_monocytogenes_1639_v50 | 0.8665 |
| Listeria_seeligeri_1640                                  | Listeria_monocytogenes_1639_v50 | 0.8642 |
| Listeria_monocytogenes_WSLC1042_1457188                  | Listeria_monocytogenes_1639_v50 | 0.9156 |
| Listeria_monocytogenes_WSLC1001_1457187                  | Listeria_monocytogenes_1639_v50 | 0.9505 |
| Listeria_monocytogenes_SLCC7179_879090                   | Listeria_monocytogenes_1639_v50 | 0.9471 |
| Listeria_monocytogenes_SLCC5850_882096                   | Listeria_monocytogenes_1639_v50 | 0.9507 |
| Listeria_monocytogenes_SLCC2755_932919                   | Listeria_monocytogenes_1639_v50 | 0.9166 |
| Listeria_monocytogenes_SLCC2540_879089                   | Listeria_monocytogenes_1639_v50 | 0.9342 |
| Listeria_monocytogenes_SLCC2479_882020                   | Listeria_monocytogenes_1639_v50 | 0.9494 |
| Listeria_monocytogenes_SLCC2378_879088                   | Listeria_monocytogenes_1639_v50 | 0.917  |
| Listeria_monocytogenes_SLCC2376_882097                   | Listeria_monocytogenes_1639_v50 | 0.9205 |
| Listeria_monocytogenes_SLCC2372_932920                   | Listeria_monocytogenes_1639_v50 | 0.9425 |
| Listeria_monocytogenes_serotype_4b_str_LL195_1230340     | Listeria_monocytogenes_1639_v50 | 0.9221 |
| Listeria_monocytogenes_serotype_4b_str_LIS0087_1134669   | Listeria_monocytogenes_1639_v50 | 0.9326 |
| Listeria_monocytogenes_serotype_4b_str_F2365_265669      | Listeria_monocytogenes_1639_v50 | 0.9221 |
| Listeria_monocytogenes_serotype_4b_str_CLIP_80459_568819 | Listeria_monocytogenes_1639_v50 | 0.9288 |
| Listeria_monocytogenes_serotype_4b_str_81-0861_1196161   | Listeria_monocytogenes_1639_v50 | 0.9128 |
| Listeria_monocytogenes_serotype_4b_str_81-0592_1196160   | Listeria_monocytogenes_1639_v50 | 0.9138 |
| Listeria_monocytogenes_serotype_4b_str_81-0558_1196159   | Listeria_monocytogenes_1639_v50 | 0.9145 |
| Listeria_monocytogenes_serotype_4b_str_10-0809_1196162   | Listeria_monocytogenes_1639_v50 | 0.9138 |
| Listeria_monocytogenes_serotype_4b_str_02-6680_1196175   | Listeria_monocytogenes_1639_v50 | 0.9256 |
| Listeria_monocytogenes_serotype_4b_str_02-6679_1196174   | Listeria_monocytogenes_1639_v50 | 0.9256 |
| Listeria_monocytogenes_serotype_4b_str_02-1792_1196173   | Listeria_monocytogenes_1639_v50 | 0.9156 |
| Listeria_monocytogenes_serotype_4b_str_02-1289_1196172   | Listeria_monocytogenes_1639_v50 | 0.9156 |
| Listeria_monocytogenes_serotype_4b_str_02-1103_1196171   | Listeria_monocytogenes_1639_v50 | 0.9156 |
| Listeria_monocytogenes_serotype_3c_str_10-5027_1196195   | Listeria_monocytogenes_1639_v50 | 0.9523 |
| Listeria_monocytogenes_serotype_1_2c_str_10-5026_1196194 | Listeria_monocytogenes_1639_v50 | 0.9531 |
| Listeria_monocytogenes_serotype_1_2c_str_10-5025_1196193 | Listeria_monocytogenes_1639_v50 | 0.9531 |
| Listeria_monocytogenes_serotype_1_2b_str_10-0811_1196164 | Listeria_monocytogenes_1639_v50 | 0.9338 |
| Listeria_monocytogenes_serotype_1_2b_str_10-0810_1196163 | Listeria_monocytogenes_1639_v50 | 0.9338 |
| Listeria_monocytogenes_serotype_1_2a_str_99-6370_1196179 | Listeria_monocytogenes_1639_v50 | 0.9923 |
| Listeria_monocytogenes_serotype_1_2a_str_98-2035_1196178 | Listeria_monocytogenes_1639_v50 | 0.9923 |
| Listeria_monocytogenes_serotype_1_2a_str_95-0093_1196177 | Listeria_monocytogenes_1639_v50 | 0.9967 |
| Listeria_monocytogenes_serotype_1_2a_str_88-0478_1196176 | Listeria_monocytogenes_1639_v50 | 0.9927 |
| Listeria_monocytogenes_serotype_1_2a_str_10-5024_1196192 | Listeria_monocytogenes_1639_v50 | 0.9985 |
| Listeria_monocytogenes_serotype_1_2a_str_10-4758_1196168 | Listeria_monocytogenes_1639_v50 | 0.9489 |
| Listeria_monocytogenes_serotype_1_2a_str_10-4754_1196167 | Listeria_monocytogenes_1639_v50 | 0.9489 |
| Listeria_monocytogenes_serotype_1_2a_str_10-1321_1196191 | Listeria_monocytogenes_1639_v50 | 0.9985 |
| Listeria_monocytogenes_serotype_1_2a_str_10-1047_1196190 | Listeria_monocytogenes_1639_v50 | 0.9952 |
| Listeria_monocytogenes_serotype_1_2a_str_10-1046_1196189 | Listeria_monocytogenes_1639_v50 | 0.9952 |
| Listeria_monocytogenes_serotype_1_2a_str_10-0934_1196170 | Listeria_monocytogenes_1639_v50 | 0.9479 |
| Listeria_monocytogenes_serotype_1_2a_str_10-0933_1196169 | Listeria_monocytogenes_1639_v50 | 0.9479 |
| Listeria_monocytogenes_serotype_1_2a_str_10-0815_1196188 | Listeria_monocytogenes_1639_v50 | 0.9938 |
| Listeria_monocytogenes_serotype_1_2a_str_10-0814_1196187 | Listeria_monocytogenes_1639_v50 | 0.9985 |
| Listeria_monocytogenes_serotype_1_2a_str_10-0813_1196166 | Listeria_monocytogenes_1639_v50 | 0.9529 |
| Listeria_monocytogenes_serotype_1_2a_str_10-0812_1196165 | Listeria_monocytogenes_1639_v50 | 0.9529 |
| Listeria_monocytogenes_serotype_1_2a_str_08-7669_1196186 | Listeria_monocytogenes_1639_v50 | 0.9881 |
| Listeria_monocytogenes_serotype_1_2a_str_08-7374_1196185 | Listeria_monocytogenes_1639_v50 | 0.9985 |
| Listeria_monocytogenes_serotype_1_2a_str_08-6997_1196184 | Listeria_monocytogenes_1639_v50 | 0.9938 |
| Listeria_monocytogenes_serotype_1_2a_str_08-6569_1196183 | Listeria_monocytogenes_1639_v50 | 0.9938 |
| Listeria_monocytogenes_serotype_1_2a_str_08-6056_1196182 | Listeria_monocytogenes_1639_v50 | 0.9938 |
| Listeria_monocytogenes_serotype_1_2a_str_04-5457_1196181 | Listeria_monocytogenes_1639_v50 | 0.9985 |
| Listeria_monocytogenes_serotype_1_2a_str_02-5993_1196180 | Listeria_monocytogenes_1639_v50 | 0.9982 |
| Listeria_monocytogenes_R479a_1437838                     | Listeria_monocytogenes_1639_v50 | 0.9663 |
| Listeria_monocytogenes_N53-1_1234142                     | Listeria_monocytogenes_1639_v50 | 0.8923 |
| Listeria_monocytogenes_M7_1030009                        | Listeria_monocytogenes_1639_v50 | 0.8985 |
| Listeria_monocytogenes_LO28_393132                       | Listeria_monocytogenes_1639_v50 | 0.9425 |
| Listeria_monocytogenes_L99_563174                        | Listeria_monocytogenes_1639_v50 | 0.8992 |
| Listeria_monocytogenes_L312_882094                       | Listeria_monocytogenes_1639_v50 | 0.9288 |
| Listeria_monocytogenes_J1816_930781                      | Listeria_monocytogenes_1639_v50 | 0.9193 |
| Listeria_monocytogenes_J1-220_930782                     | Listeria_monocytogenes_1639_v50 | 0.9189 |
| Listeria_monocytogenes_J0161_393130                      | Listeria_monocytogenes_1639_v50 | 0.9414 |
| Listeria_monocytogenes_HCC23_552536                      | Listeria_monocytogenes_1639_v50 | 0.8985 |
| Listeria_monocytogenes_FSL_R2-561_393126                 | Listeria_monocytogenes_1639_v50 | 0.9498 |
| Listeria_monocytogenes_FSL_J1-208_393119                 | Listeria_monocytogenes_1639_v50 | 0.8871 |
| Listeria_monocytogenes_FSL_J1-175_393118                 | Listeria_monocytogenes_1639_v50 | 0.932  |
| Listeria_monocytogenes_Finland_1998_393127               | Listeria_monocytogenes_1639_v50 | 0.9482 |
| Listeria_monocytogenes_EGD-e_169963_v1                   | Listeria_monocytogenes_1639_v50 | 0.9419 |
| Listeria_monocytogenes_EGD-e_169963                      | Listeria_monocytogenes_1639_v50 | 0.9423 |
| Listeria_monocytogenes_EGD_1334565                       | Listeria_monocytogenes_1639_v50 | 0.9514 |



|                                                          |                                 |        |
|----------------------------------------------------------|---------------------------------|--------|
| Listeria_monocytogenes_CFSAN002349_1299895               | Listeria_monocytogenes_1639_v50 | 0.9257 |
| Listeria_monocytogenes_ATCC_19117_882095_v1              | Listeria_monocytogenes_1639_v50 | 0.9205 |
| Listeria_monocytogenes_ATCC_19117_882095                 | Listeria_monocytogenes_1639_v50 | 0.9205 |
| Listeria_monocytogenes_6179_1288295                      | Listeria_monocytogenes_1639_v50 | 0.9411 |
| Listeria_monocytogenes_1639_v9                           | Listeria_monocytogenes_1639_v50 | 0.9224 |
| Listeria_monocytogenes_1639_v99                          | Listeria_monocytogenes_1639_v50 | 0.9204 |
| Listeria_monocytogenes_1639_v98                          | Listeria_monocytogenes_1639_v50 | 0.9394 |
| Listeria_monocytogenes_1639_v97                          | Listeria_monocytogenes_1639_v50 | 0.9239 |
| Listeria_monocytogenes_1639_v96                          | Listeria_monocytogenes_1639_v50 | 0.919  |
| Listeria_monocytogenes_1639_v95                          | Listeria_monocytogenes_1639_v50 | 0.919  |
| Listeria_monocytogenes_1639_v94                          | Listeria_monocytogenes_1639_v50 | 0.9194 |
| Listeria_monocytogenes_1639_v93                          | Listeria_monocytogenes_1639_v50 | 0.9347 |
| Listeria_monocytogenes_1639_v92                          | Listeria_monocytogenes_1639_v50 | 0.9208 |
| Listeria_monocytogenes_1639_v91                          | Listeria_monocytogenes_1639_v50 | 0.921  |
| Listeria_monocytogenes_1639_v90                          | Listeria_monocytogenes_1639_v50 | 0.9394 |
| Listeria_monocytogenes_1639_v8                           | Listeria_monocytogenes_1639_v50 | 0.9558 |
| Listeria_monocytogenes_1639_v89                          | Listeria_monocytogenes_1639_v50 | 0.9269 |
| Listeria_monocytogenes_1639_v88                          | Listeria_monocytogenes_1639_v50 | 0.9548 |
| Listeria_monocytogenes_1639_v87                          | Listeria_monocytogenes_1639_v50 | 0.948  |
| Listeria_monocytogenes_1639_v86                          | Listeria_monocytogenes_1639_v50 | 0.9469 |
| Listeria_monocytogenes_1639_v85                          | Listeria_monocytogenes_1639_v50 | 0.9132 |
| Listeria_monocytogenes_1639_v84                          | Listeria_monocytogenes_1639_v50 | 0.9555 |
| Listeria_monocytogenes_1639_v83                          | Listeria_monocytogenes_1639_v50 | 0.9152 |
| Listeria_monocytogenes_1639_v82                          | Listeria_monocytogenes_1639_v50 | 0.9148 |
| Listeria_monocytogenes_1639_v81                          | Listeria_monocytogenes_1639_v50 | 0.9593 |
| Listeria_monocytogenes_1639_v80                          | Listeria_monocytogenes_1639_v50 | 0.935  |
| Listeria_monocytogenes_1639_v7                           | Listeria_monocytogenes_1639_v50 | 0.9558 |
| Listeria_monocytogenes_1639_v79                          | Listeria_monocytogenes_1639_v50 | 0.9557 |
| Listeria_monocytogenes_1639_v78                          | Listeria_monocytogenes_1639_v50 | 0.96   |
| Listeria_monocytogenes_1639_v77                          | Listeria_monocytogenes_1639_v50 | 0.9458 |
| Listeria_monocytogenes_1639_v76                          | Listeria_monocytogenes_1639_v50 | 0.9438 |
| Listeria_monocytogenes_1639_v75                          | Listeria_monocytogenes_1639_v50 | 0.8992 |
| Listeria_monocytogenes_1639_v74                          | Listeria_monocytogenes_1639_v50 | 0.9344 |
| Listeria_monocytogenes_1639_v73                          | Listeria_monocytogenes_1639_v50 | 0.9406 |
| Listeria_monocytogenes_1639_v72                          | Listeria_monocytogenes_1639_v50 | 0.9162 |
| Listeria_monocytogenes_1639_v71                          | Listeria_monocytogenes_1639_v50 | 0.9359 |
| Listeria_monocytogenes_1639_v70                          | Listeria_monocytogenes_1639_v50 | 0.9503 |
| Listeria_monocytogenes_1639_v6                           | Listeria_monocytogenes_1639_v50 | 0.9551 |
| Listeria_monocytogenes_1639_v69                          | Listeria_monocytogenes_1639_v50 | 0.9141 |
| Listeria_monocytogenes_1639_v68                          | Listeria_monocytogenes_1639_v50 | 0.9344 |
| Listeria_monocytogenes_1639_v67                          | Listeria_monocytogenes_1639_v50 | 0.9348 |
| Listeria_monocytogenes_1639_v66                          | Listeria_monocytogenes_1639_v50 | 0.9478 |
| Listeria_monocytogenes_1639_v65                          | Listeria_monocytogenes_1639_v50 | 0.9661 |
| Listeria_monocytogenes_1639_v64                          | Listeria_monocytogenes_1639_v50 | 0.9434 |
| Listeria_monocytogenes_1639_v63                          | Listeria_monocytogenes_1639_v50 | 0.9363 |
| Listeria_monocytogenes_1639_v62                          | Listeria_monocytogenes_1639_v50 | 0.9546 |
| Listeria_monocytogenes_1639_v61                          | Listeria_monocytogenes_1639_v50 | 0.9757 |
| Listeria_monocytogenes_1639_v60                          | Listeria_monocytogenes_1639_v50 | 0.9422 |
| Listeria_monocytogenes_1639_v5                           | Listeria_monocytogenes_1639_v50 | 0.8905 |
| Listeria_monocytogenes_1639_v59                          | Listeria_monocytogenes_1639_v50 | 0.921  |
| Listeria_monocytogenes_1639_v58                          | Listeria_monocytogenes_1639_v50 | 0.9162 |
| Listeria_monocytogenes_1639_v57                          | Listeria_monocytogenes_1639_v50 | 0.9168 |
| Listeria_monocytogenes_1639_v56                          | Listeria_monocytogenes_1639_v50 | 0.9222 |
| Listeria_monocytogenes_1639_v55                          | Listeria_monocytogenes_1639_v50 | 0.9141 |
| Listeria_monocytogenes_1639_v54                          | Listeria_monocytogenes_1639_v50 | 0.9157 |
| Listeria_monocytogenes_1639_v53                          | Listeria_monocytogenes_1639_v50 | 0.9311 |
| Listeria_monocytogenes_1639_v52                          | Listeria_monocytogenes_1639_v50 | 0.9228 |
| Listeria_monocytogenes_1639_v51                          | Listeria_monocytogenes_1639_v50 | 0.9134 |
| Listeria_monocytogenes_1639_v50                          | Listeria_monocytogenes_1639_v50 | 0.0664 |
| Listeria_welshimeri_1643                                 | Listeria_monocytogenes_1639_v51 | 0.8793 |
| Listeria_welshimeri_serovar_6b_str_SLCC5334_386043       | Listeria_monocytogenes_1639_v51 | 0.8786 |
| Listeria_seeligeri_serovar_1_2b_str_SLCC3954_683837      | Listeria_monocytogenes_1639_v51 | 0.8734 |
| Listeria_seeligeri_FSL_S4-171_702452                     | Listeria_monocytogenes_1639_v51 | 0.8208 |
| Listeria_seeligeri_FSL_N1-067_702453                     | Listeria_monocytogenes_1639_v51 | 0.8234 |
| Listeria_seeligeri_1640_v1                               | Listeria_monocytogenes_1639_v51 | 0.8814 |
| Listeria_seeligeri_1640                                  | Listeria_monocytogenes_1639_v51 | 0.8789 |
| Listeria_monocytogenes_WSLC1042_1457188                  | Listeria_monocytogenes_1639_v51 | 0.964  |
| Listeria_monocytogenes_WSLC1001_1457187                  | Listeria_monocytogenes_1639_v51 | 0.9197 |
| Listeria_monocytogenes_SLCC7179_879090                   | Listeria_monocytogenes_1639_v51 | 0.9344 |
| Listeria_monocytogenes_SLCC5850_882096                   | Listeria_monocytogenes_1639_v51 | 0.9242 |
| Listeria_monocytogenes_SLCC2755_932919                   | Listeria_monocytogenes_1639_v51 | 0.9371 |
| Listeria_monocytogenes_SLCC2540_879089                   | Listeria_monocytogenes_1639_v51 | 0.935  |
| Listeria_monocytogenes_SLCC2479_882020                   | Listeria_monocytogenes_1639_v51 | 0.9165 |
| Listeria_monocytogenes_SLCC2378_879088                   | Listeria_monocytogenes_1639_v51 | 0.9655 |
| Listeria_monocytogenes_SLCC2376_882097                   | Listeria_monocytogenes_1639_v51 | 0.9259 |
| Listeria_monocytogenes_SLCC2372_932920                   | Listeria_monocytogenes_1639_v51 | 0.9172 |
| Listeria_monocytogenes_serotype_4b_str_LL195_1230340     | Listeria_monocytogenes_1639_v51 | 0.9603 |
| Listeria_monocytogenes_serotype_4b_str_LIS0087_1134669   | Listeria_monocytogenes_1639_v51 | 0.9118 |
| Listeria_monocytogenes_serotype_4b_str_F2365_265669      | Listeria_monocytogenes_1639_v51 | 0.9603 |
| Listeria_monocytogenes_serotype_4b_str_CLIP_80459_568819 | Listeria_monocytogenes_1639_v51 | 0.9557 |
| Listeria_monocytogenes_serotype_4b_str_81-0861_1196161   | Listeria_monocytogenes_1639_v51 | 0.9688 |
| Listeria_monocytogenes_serotype_4b_str_81-0592_1196160   | Listeria_monocytogenes_1639_v51 | 0.9699 |
| Listeria_monocytogenes_serotype_4b_str_81-0558_1196159   | Listeria_monocytogenes_1639_v51 | 0.9695 |
| Listeria_monocytogenes_serotype_4b_str_10-0809_1196162   | Listeria_monocytogenes_1639_v51 | 0.9699 |
| Listeria_monocytogenes_serotype_4b_str_02-6680_1196175   | Listeria_monocytogenes_1639_v51 | 0.9619 |
| Listeria_monocytogenes_serotype_4b_str_02-6679_1196174   | Listeria_monocytogenes_1639_v51 | 0.9619 |
| Listeria_monocytogenes_serotype_4b_str_02-1792_1196173   | Listeria_monocytogenes_1639_v51 | 0.9699 |
| Listeria_monocytogenes_serotype_4b_str_02-1289_1196172   | Listeria_monocytogenes_1639_v51 | 0.9699 |
| Listeria_monocytogenes_serotype_4b_str_02-1103_1196171   | Listeria_monocytogenes_1639_v51 | 0.9699 |
| Listeria_monocytogenes_serotype_3c_str_10-5027_1196195   | Listeria_monocytogenes_1639_v51 | 0.9161 |
| Listeria_monocytogenes_serotype_1_2c_str_10-5026_1196194 | Listeria_monocytogenes_1639_v51 | 0.9169 |

|                                                          |                                 |        |
|----------------------------------------------------------|---------------------------------|--------|
| Listeria_monocytogenes_serotype_1_2c_str_10-5025_1196193 | Listeria_monocytogenes_1639_v51 | 0.9169 |
| Listeria_monocytogenes_serotype_1_2b_str_10-0811_1196164 | Listeria_monocytogenes_1639_v51 | 0.9405 |
| Listeria_monocytogenes_serotype_1_2b_str_10-0810_1196163 | Listeria_monocytogenes_1639_v51 | 0.9405 |
| Listeria_monocytogenes_serotype_1_2a_str_99-6370_1196179 | Listeria_monocytogenes_1639_v51 | 0.9099 |
| Listeria_monocytogenes_serotype_1_2a_str_98-2035_1196178 | Listeria_monocytogenes_1639_v51 | 0.9099 |
| Listeria_monocytogenes_serotype_1_2a_str_95-0093_1196177 | Listeria_monocytogenes_1639_v51 | 0.9141 |
| Listeria_monocytogenes_serotype_1_2a_str_88-0478_1196176 | Listeria_monocytogenes_1639_v51 | 0.9133 |
| Listeria_monocytogenes_serotype_1_2a_str_10-5024_1196192 | Listeria_monocytogenes_1639_v51 | 0.9145 |
| Listeria_monocytogenes_serotype_1_2a_str_10-4758_1196168 | Listeria_monocytogenes_1639_v51 | 0.9251 |
| Listeria_monocytogenes_serotype_1_2a_str_10-4754_1196167 | Listeria_monocytogenes_1639_v51 | 0.9251 |
| Listeria_monocytogenes_serotype_1_2a_str_10-1321_1196191 | Listeria_monocytogenes_1639_v51 | 0.9145 |
| Listeria_monocytogenes_serotype_1_2a_str_10-1047_1196190 | Listeria_monocytogenes_1639_v51 | 0.9148 |
| Listeria_monocytogenes_serotype_1_2a_str_10-1046_1196189 | Listeria_monocytogenes_1639_v51 | 0.9148 |
| Listeria_monocytogenes_serotype_1_2a_str_10-0934_1196170 | Listeria_monocytogenes_1639_v51 | 0.9302 |
| Listeria_monocytogenes_serotype_1_2a_str_10-0933_1196169 | Listeria_monocytogenes_1639_v51 | 0.9302 |
| Listeria_monocytogenes_serotype_1_2a_str_10-0815_1196188 | Listeria_monocytogenes_1639_v51 | 0.9105 |
| Listeria_monocytogenes_serotype_1_2a_str_10-0814_1196187 | Listeria_monocytogenes_1639_v51 | 0.9145 |
| Listeria_monocytogenes_serotype_1_2a_str_10-0813_1196166 | Listeria_monocytogenes_1639_v51 | 0.9274 |
| Listeria_monocytogenes_serotype_1_2a_str_10-0812_1196165 | Listeria_monocytogenes_1639_v51 | 0.9274 |
| Listeria_monocytogenes_serotype_1_2a_str_08-7669_1196186 | Listeria_monocytogenes_1639_v51 | 0.9229 |
| Listeria_monocytogenes_serotype_1_2a_str_08-7374_1196185 | Listeria_monocytogenes_1639_v51 | 0.9145 |
| Listeria_monocytogenes_serotype_1_2a_str_08-6997_1196184 | Listeria_monocytogenes_1639_v51 | 0.9105 |
| Listeria_monocytogenes_serotype_1_2a_str_08-6569_1196183 | Listeria_monocytogenes_1639_v51 | 0.9105 |
| Listeria_monocytogenes_serotype_1_2a_str_08-6056_1196182 | Listeria_monocytogenes_1639_v51 | 0.9105 |
| Listeria_monocytogenes_serotype_1_2a_str_04-5457_1196181 | Listeria_monocytogenes_1639_v51 | 0.9145 |
| Listeria_monocytogenes_serotype_1_2a_str_02-5993_1196180 | Listeria_monocytogenes_1639_v51 | 0.9141 |
| Listeria_monocytogenes_R479a_1437838                     | Listeria_monocytogenes_1639_v51 | 0.9142 |
| Listeria_monocytogenes_N53-1_1234142                     | Listeria_monocytogenes_1639_v51 | 0.8846 |
| Listeria_monocytogenes_M7_1030009                        | Listeria_monocytogenes_1639_v51 | 0.9084 |
| Listeria_monocytogenes_LO28_393132                       | Listeria_monocytogenes_1639_v51 | 0.9222 |
| Listeria_monocytogenes_L99_563174                        | Listeria_monocytogenes_1639_v51 | 0.9091 |
| Listeria_monocytogenes_L312_882094                       | Listeria_monocytogenes_1639_v51 | 0.9561 |
| Listeria_monocytogenes_J1816_930781                      | Listeria_monocytogenes_1639_v51 | 0.9426 |
| Listeria_monocytogenes_J1-220_930782                     | Listeria_monocytogenes_1639_v51 | 0.979  |
| Listeria_monocytogenes_J0161_393130                      | Listeria_monocytogenes_1639_v51 | 0.9292 |
| Listeria_monocytogenes_HCC23_552536                      | Listeria_monocytogenes_1639_v51 | 0.9084 |
| Listeria_monocytogenes_FSL_R2-561_393126                 | Listeria_monocytogenes_1639_v51 | 0.9152 |
| Listeria_monocytogenes_FSL_J1-208_393119                 | Listeria_monocytogenes_1639_v51 | 0.908  |
| Listeria_monocytogenes_FSL_J1-175_393118                 | Listeria_monocytogenes_1639_v51 | 0.9415 |
| Listeria_monocytogenes_Finland_1998_393127               | Listeria_monocytogenes_1639_v51 | 0.9317 |
| Listeria_monocytogenes_EGD-e_169963_v1                   | Listeria_monocytogenes_1639_v51 | 0.9334 |
| Listeria_monocytogenes_EGD-e_169963                      | Listeria_monocytogenes_1639_v51 | 0.9338 |
| Listeria_monocytogenes_EGD_1334565                       | Listeria_monocytogenes_1639_v51 | 0.9249 |
| Listeria_monocytogenes_CFSAN002349_1299895               | Listeria_monocytogenes_1639_v51 | 0.9555 |
| Listeria_monocytogenes_ATCC_19117_882095_v1              | Listeria_monocytogenes_1639_v51 | 0.9823 |
| Listeria_monocytogenes_ATCC_19117_882095                 | Listeria_monocytogenes_1639_v51 | 0.9823 |
| Listeria_monocytogenes_6179_1288295                      | Listeria_monocytogenes_1639_v51 | 0.9178 |
| Listeria_monocytogenes_1639_v9                           | Listeria_monocytogenes_1639_v51 | 0.9253 |
| Listeria_monocytogenes_1639_v99                          | Listeria_monocytogenes_1639_v51 | 0.9489 |
| Listeria_monocytogenes_1639_v98                          | Listeria_monocytogenes_1639_v51 | 0.9254 |
| Listeria_monocytogenes_1639_v97                          | Listeria_monocytogenes_1639_v51 | 0.9556 |
| Listeria_monocytogenes_1639_v96                          | Listeria_monocytogenes_1639_v51 | 0.9479 |
| Listeria_monocytogenes_1639_v95                          | Listeria_monocytogenes_1639_v51 | 0.9479 |
| Listeria_monocytogenes_1639_v94                          | Listeria_monocytogenes_1639_v51 | 0.9479 |
| Listeria_monocytogenes_1639_v93                          | Listeria_monocytogenes_1639_v51 | 0.9156 |
| Listeria_monocytogenes_1639_v92                          | Listeria_monocytogenes_1639_v51 | 0.9493 |
| Listeria_monocytogenes_1639_v91                          | Listeria_monocytogenes_1639_v51 | 0.957  |
| Listeria_monocytogenes_1639_v90                          | Listeria_monocytogenes_1639_v51 | 0.9254 |
| Listeria_monocytogenes_1639_v8                           | Listeria_monocytogenes_1639_v51 | 0.9086 |
| Listeria_monocytogenes_1639_v89                          | Listeria_monocytogenes_1639_v51 | 0.9637 |
| Listeria_monocytogenes_1639_v88                          | Listeria_monocytogenes_1639_v51 | 0.92   |
| Listeria_monocytogenes_1639_v87                          | Listeria_monocytogenes_1639_v51 | 0.9237 |
| Listeria_monocytogenes_1639_v86                          | Listeria_monocytogenes_1639_v51 | 0.9233 |
| Listeria_monocytogenes_1639_v85                          | Listeria_monocytogenes_1639_v51 | 0.9718 |
| Listeria_monocytogenes_1639_v84                          | Listeria_monocytogenes_1639_v51 | 0.9254 |
| Listeria_monocytogenes_1639_v83                          | Listeria_monocytogenes_1639_v51 | 0.9855 |
| Listeria_monocytogenes_1639_v82                          | Listeria_monocytogenes_1639_v51 | 0.9848 |
| Listeria_monocytogenes_1639_v81                          | Listeria_monocytogenes_1639_v51 | 0.92   |
| Listeria_monocytogenes_1639_v80                          | Listeria_monocytogenes_1639_v51 | 0.943  |
| Listeria_monocytogenes_1639_v7                           | Listeria_monocytogenes_1639_v51 | 0.9086 |
| Listeria_monocytogenes_1639_v79                          | Listeria_monocytogenes_1639_v51 | 0.918  |
| Listeria_monocytogenes_1639_v78                          | Listeria_monocytogenes_1639_v51 | 0.9197 |
| Listeria_monocytogenes_1639_v77                          | Listeria_monocytogenes_1639_v51 | 0.9235 |
| Listeria_monocytogenes_1639_v76                          | Listeria_monocytogenes_1639_v51 | 0.9151 |
| Listeria_monocytogenes_1639_v75                          | Listeria_monocytogenes_1639_v51 | 0.9091 |
| Listeria_monocytogenes_1639_v74                          | Listeria_monocytogenes_1639_v51 | 0.9219 |
| Listeria_monocytogenes_1639_v73                          | Listeria_monocytogenes_1639_v51 | 0.9241 |
| Listeria_monocytogenes_1639_v72                          | Listeria_monocytogenes_1639_v51 | 0.9832 |
| Listeria_monocytogenes_1639_v71                          | Listeria_monocytogenes_1639_v51 | 0.9051 |
| Listeria_monocytogenes_1639_v70                          | Listeria_monocytogenes_1639_v51 | 0.9172 |
| Listeria_monocytogenes_1639_v6                           | Listeria_monocytogenes_1639_v51 | 0.9079 |
| Listeria_monocytogenes_1639_v69                          | Listeria_monocytogenes_1639_v51 | 0.9703 |
| Listeria_monocytogenes_1639_v68                          | Listeria_monocytogenes_1639_v51 | 0.9386 |
| Listeria_monocytogenes_1639_v67                          | Listeria_monocytogenes_1639_v51 | 0.939  |
| Listeria_monocytogenes_1639_v66                          | Listeria_monocytogenes_1639_v51 | 0.9199 |
| Listeria_monocytogenes_1639_v65                          | Listeria_monocytogenes_1639_v51 | 0.9246 |
| Listeria_monocytogenes_1639_v64                          | Listeria_monocytogenes_1639_v51 | 0.9149 |
| Listeria_monocytogenes_1639_v63                          | Listeria_monocytogenes_1639_v51 | 0.9379 |
| Listeria_monocytogenes_1639_v62                          | Listeria_monocytogenes_1639_v51 | 0.9174 |
| Listeria_monocytogenes_1639_v61                          | Listeria_monocytogenes_1639_v51 | 0.9183 |
| Listeria_monocytogenes_1639_v60                          | Listeria_monocytogenes_1639_v51 | 0.9237 |

|                                                          |                                 |        |
|----------------------------------------------------------|---------------------------------|--------|
| Listeria_monocytogenes_1639_v5                           | Listeria_monocytogenes_1639_v51 | 0.9142 |
| Listeria_monocytogenes_1639_v59                          | Listeria_monocytogenes_1639_v51 | 0.9765 |
| Listeria_monocytogenes_1639_v58                          | Listeria_monocytogenes_1639_v51 | 0.9769 |
| Listeria_monocytogenes_1639_v57                          | Listeria_monocytogenes_1639_v51 | 0.94   |
| Listeria_monocytogenes_1639_v56                          | Listeria_monocytogenes_1639_v51 | 0.9803 |
| Listeria_monocytogenes_1639_v55                          | Listeria_monocytogenes_1639_v51 | 0.9494 |
| Listeria_monocytogenes_1639_v54                          | Listeria_monocytogenes_1639_v51 | 0.9168 |
| Listeria_monocytogenes_1639_v53                          | Listeria_monocytogenes_1639_v51 | 0.9174 |
| Listeria_monocytogenes_1639_v52                          | Listeria_monocytogenes_1639_v51 | 0.9737 |
| Listeria_monocytogenes_1639_v51                          | Listeria_monocytogenes_1639_v51 | 0.0696 |
| Listeria_welshimeri_1643                                 | Listeria_monocytogenes_1639_v52 | 0.8809 |
| Listeria_welshimeri_serovar_6b_str_SLCC5334_386043       | Listeria_monocytogenes_1639_v52 | 0.8806 |
| Listeria_seeligeri_serovar_1_2b_str_SLCC3954_683837      | Listeria_monocytogenes_1639_v52 | 0.8758 |
| Listeria_seeligeri_FSL_S4-171_702452                     | Listeria_monocytogenes_1639_v52 | 0.8223 |
| Listeria_seeligeri_FSL_N1-067_702453                     | Listeria_monocytogenes_1639_v52 | 0.8267 |
| Listeria_seeligeri_1640_v1                               | Listeria_monocytogenes_1639_v52 | 0.88   |
| Listeria_seeligeri_1640                                  | Listeria_monocytogenes_1639_v52 | 0.8786 |
| Listeria_monocytogenes_WSLC1042_1457188                  | Listeria_monocytogenes_1639_v52 | 0.9564 |
| Listeria_monocytogenes_WSLC1001_1457187                  | Listeria_monocytogenes_1639_v52 | 0.93   |
| Listeria_monocytogenes_SLCC7179_879090                   | Listeria_monocytogenes_1639_v52 | 0.9362 |
| Listeria_monocytogenes_SLCC5850_882096                   | Listeria_monocytogenes_1639_v52 | 0.9334 |
| Listeria_monocytogenes_SLCC2755_932919                   | Listeria_monocytogenes_1639_v52 | 0.9329 |
| Listeria_monocytogenes_SLCC2540_879089                   | Listeria_monocytogenes_1639_v52 | 0.9438 |
| Listeria_monocytogenes_SLCC2479_882020                   | Listeria_monocytogenes_1639_v52 | 0.9238 |
| Listeria_monocytogenes_SLCC2378_879088                   | Listeria_monocytogenes_1639_v52 | 0.9575 |
| Listeria_monocytogenes_SLCC2376_882097                   | Listeria_monocytogenes_1639_v52 | 0.928  |
| Listeria_monocytogenes_SLCC2372_932920                   | Listeria_monocytogenes_1639_v52 | 0.917  |
| Listeria_monocytogenes_serotype_4b_str_LL195_1230340     | Listeria_monocytogenes_1639_v52 | 0.9629 |
| Listeria_monocytogenes_serotype_4b_str_LIS0087_1134669   | Listeria_monocytogenes_1639_v52 | 0.9188 |
| Listeria_monocytogenes_serotype_4b_str_F2365_265669      | Listeria_monocytogenes_1639_v52 | 0.9629 |
| Listeria_monocytogenes_serotype_4b_str_CLIP_80459_568819 | Listeria_monocytogenes_1639_v52 | 0.9587 |
| Listeria_monocytogenes_serotype_4b_str_81-0861_1196161   | Listeria_monocytogenes_1639_v52 | 0.9631 |
| Listeria_monocytogenes_serotype_4b_str_81-0592_1196160   | Listeria_monocytogenes_1639_v52 | 0.9642 |
| Listeria_monocytogenes_serotype_4b_str_81-0558_1196159   | Listeria_monocytogenes_1639_v52 | 0.9635 |
| Listeria_monocytogenes_serotype_4b_str_10-0809_1196162   | Listeria_monocytogenes_1639_v52 | 0.9642 |
| Listeria_monocytogenes_serotype_4b_str_02-6680_1196175   | Listeria_monocytogenes_1639_v52 | 0.9648 |
| Listeria_monocytogenes_serotype_4b_str_02-6679_1196174   | Listeria_monocytogenes_1639_v52 | 0.9648 |
| Listeria_monocytogenes_serotype_4b_str_02-1792_1196173   | Listeria_monocytogenes_1639_v52 | 0.9639 |
| Listeria_monocytogenes_serotype_4b_str_02-1289_1196172   | Listeria_monocytogenes_1639_v52 | 0.9639 |
| Listeria_monocytogenes_serotype_4b_str_02-1103_1196171   | Listeria_monocytogenes_1639_v52 | 0.9639 |
| Listeria_monocytogenes_serotype_3c_str_10-5027_1196195   | Listeria_monocytogenes_1639_v52 | 0.9245 |
| Listeria_monocytogenes_serotype_1_2c_str_10-5026_1196194 | Listeria_monocytogenes_1639_v52 | 0.9245 |
| Listeria_monocytogenes_serotype_1_2c_str_10-5025_1196193 | Listeria_monocytogenes_1639_v52 | 0.9245 |
| Listeria_monocytogenes_serotype_1_2b_str_10-0811_1196164 | Listeria_monocytogenes_1639_v52 | 0.9489 |
| Listeria_monocytogenes_serotype_1_2b_str_10-0810_1196163 | Listeria_monocytogenes_1639_v52 | 0.9489 |
| Listeria_monocytogenes_serotype_1_2a_str_99-6370_1196179 | Listeria_monocytogenes_1639_v52 | 0.9185 |
| Listeria_monocytogenes_serotype_1_2a_str_98-2035_1196178 | Listeria_monocytogenes_1639_v52 | 0.9185 |
| Listeria_monocytogenes_serotype_1_2a_str_95-0093_1196177 | Listeria_monocytogenes_1639_v52 | 0.9235 |
| Listeria_monocytogenes_serotype_1_2a_str_88-0478_1196176 | Listeria_monocytogenes_1639_v52 | 0.9231 |
| Listeria_monocytogenes_serotype_1_2a_str_10-5024_1196192 | Listeria_monocytogenes_1639_v52 | 0.9235 |
| Listeria_monocytogenes_serotype_1_2a_str_10-4758_1196168 | Listeria_monocytogenes_1639_v52 | 0.935  |
| Listeria_monocytogenes_serotype_1_2a_str_10-4754_1196167 | Listeria_monocytogenes_1639_v52 | 0.9354 |
| Listeria_monocytogenes_serotype_1_2a_str_10-1321_1196191 | Listeria_monocytogenes_1639_v52 | 0.9235 |
| Listeria_monocytogenes_serotype_1_2a_str_10-1047_1196190 | Listeria_monocytogenes_1639_v52 | 0.9235 |
| Listeria_monocytogenes_serotype_1_2a_str_10-1046_1196189 | Listeria_monocytogenes_1639_v52 | 0.9235 |
| Listeria_monocytogenes_serotype_1_2a_str_10-0934_1196170 | Listeria_monocytogenes_1639_v52 | 0.9326 |
| Listeria_monocytogenes_serotype_1_2a_str_10-0933_1196169 | Listeria_monocytogenes_1639_v52 | 0.9326 |
| Listeria_monocytogenes_serotype_1_2a_str_10-0815_1196188 | Listeria_monocytogenes_1639_v52 | 0.9195 |
| Listeria_monocytogenes_serotype_1_2a_str_10-0814_1196187 | Listeria_monocytogenes_1639_v52 | 0.9239 |
| Listeria_monocytogenes_serotype_1_2a_str_10-0813_1196166 | Listeria_monocytogenes_1639_v52 | 0.9384 |
| Listeria_monocytogenes_serotype_1_2a_str_10-0812_1196165 | Listeria_monocytogenes_1639_v52 | 0.9384 |
| Listeria_monocytogenes_serotype_1_2a_str_08-7669_1196186 | Listeria_monocytogenes_1639_v52 | 0.925  |
| Listeria_monocytogenes_serotype_1_2a_str_08-7374_1196185 | Listeria_monocytogenes_1639_v52 | 0.9235 |
| Listeria_monocytogenes_serotype_1_2a_str_08-6997_1196184 | Listeria_monocytogenes_1639_v52 | 0.9195 |
| Listeria_monocytogenes_serotype_1_2a_str_08-6569_1196183 | Listeria_monocytogenes_1639_v52 | 0.9195 |
| Listeria_monocytogenes_serotype_1_2a_str_08-6056_1196182 | Listeria_monocytogenes_1639_v52 | 0.9195 |
| Listeria_monocytogenes_serotype_1_2a_str_04-5457_1196181 | Listeria_monocytogenes_1639_v52 | 0.9235 |
| Listeria_monocytogenes_serotype_1_2a_str_02-5993_1196180 | Listeria_monocytogenes_1639_v52 | 0.9235 |
| Listeria_monocytogenes_R479a_1437838                     | Listeria_monocytogenes_1639_v52 | 0.9184 |
| Listeria_monocytogenes_N53-1_1234142                     | Listeria_monocytogenes_1639_v52 | 0.8872 |
| Listeria_monocytogenes_M7_1030009                        | Listeria_monocytogenes_1639_v52 | 0.9174 |
| Listeria_monocytogenes_LO28_393132                       | Listeria_monocytogenes_1639_v52 | 0.9276 |
| Listeria_monocytogenes_L99_563174                        | Listeria_monocytogenes_1639_v52 | 0.9177 |
| Listeria_monocytogenes_L312_882094                       | Listeria_monocytogenes_1639_v52 | 0.959  |
| Listeria_monocytogenes_J1816_930781                      | Listeria_monocytogenes_1639_v52 | 0.9462 |
| Listeria_monocytogenes_J1-220_930782                     | Listeria_monocytogenes_1639_v52 | 0.9863 |
| Listeria_monocytogenes_J0161_393130                      | Listeria_monocytogenes_1639_v52 | 0.9306 |
| Listeria_monocytogenes_HCC23_552536                      | Listeria_monocytogenes_1639_v52 | 0.917  |
| Listeria_monocytogenes_FSL_R2-561_393126                 | Listeria_monocytogenes_1639_v52 | 0.9242 |
| Listeria_monocytogenes_FSL_J1-208_393119                 | Listeria_monocytogenes_1639_v52 | 0.9089 |
| Listeria_monocytogenes_FSL_J1-175_393118                 | Listeria_monocytogenes_1639_v52 | 0.9534 |
| Listeria_monocytogenes_Finland_1998_393127               | Listeria_monocytogenes_1639_v52 | 0.9341 |
| Listeria_monocytogenes_EGD-e_169963_v1                   | Listeria_monocytogenes_1639_v52 | 0.9347 |
| Listeria_monocytogenes_EGD-e_169963                      | Listeria_monocytogenes_1639_v52 | 0.9351 |
| Listeria_monocytogenes_EGD_1334565                       | Listeria_monocytogenes_1639_v52 | 0.9342 |
| Listeria_monocytogenes_CFSAN002349_1299895               | Listeria_monocytogenes_1639_v52 | 0.9584 |
| Listeria_monocytogenes_ATCC_19117_882095_v1              | Listeria_monocytogenes_1639_v52 | 0.9751 |
| Listeria_monocytogenes_ATCC_19117_882095                 | Listeria_monocytogenes_1639_v52 | 0.9747 |
| Listeria_monocytogenes_6179_1288295                      | Listeria_monocytogenes_1639_v52 | 0.9227 |
| Listeria_monocytogenes_1639_v9                           | Listeria_monocytogenes_1639_v52 | 0.9343 |
| Listeria_monocytogenes_1639_v99                          | Listeria_monocytogenes_1639_v52 | 0.9466 |

|                                                          |                                 |        |
|----------------------------------------------------------|---------------------------------|--------|
| Listeria_monocytogenes_1639_v98                          | Listeria_monocytogenes_1639_v52 | 0.9279 |
| Listeria_monocytogenes_1639_v97                          | Listeria_monocytogenes_1639_v52 | 0.9592 |
| Listeria_monocytogenes_1639_v96                          | Listeria_monocytogenes_1639_v52 | 0.9459 |
| Listeria_monocytogenes_1639_v95                          | Listeria_monocytogenes_1639_v52 | 0.9459 |
| Listeria_monocytogenes_1639_v94                          | Listeria_monocytogenes_1639_v52 | 0.9462 |
| Listeria_monocytogenes_1639_v93                          | Listeria_monocytogenes_1639_v52 | 0.9216 |
| Listeria_monocytogenes_1639_v92                          | Listeria_monocytogenes_1639_v52 | 0.9481 |
| Listeria_monocytogenes_1639_v91                          | Listeria_monocytogenes_1639_v52 | 0.9762 |
| Listeria_monocytogenes_1639_v90                          | Listeria_monocytogenes_1639_v52 | 0.9279 |
| Listeria_monocytogenes_1639_v8                           | Listeria_monocytogenes_1639_v52 | 0.9131 |
| Listeria_monocytogenes_1639_v89                          | Listeria_monocytogenes_1639_v52 | 0.9681 |
| Listeria_monocytogenes_1639_v88                          | Listeria_monocytogenes_1639_v52 | 0.9262 |
| Listeria_monocytogenes_1639_v87                          | Listeria_monocytogenes_1639_v52 | 0.9354 |
| Listeria_monocytogenes_1639_v86                          | Listeria_monocytogenes_1639_v52 | 0.935  |
| Listeria_monocytogenes_1639_v85                          | Listeria_monocytogenes_1639_v52 | 0.9647 |
| Listeria_monocytogenes_1639_v84                          | Listeria_monocytogenes_1639_v52 | 0.9327 |
| Listeria_monocytogenes_1639_v83                          | Listeria_monocytogenes_1639_v52 | 0.9784 |
| Listeria_monocytogenes_1639_v82                          | Listeria_monocytogenes_1639_v52 | 0.9776 |
| Listeria_monocytogenes_1639_v81                          | Listeria_monocytogenes_1639_v52 | 0.9295 |
| Listeria_monocytogenes_1639_v80                          | Listeria_monocytogenes_1639_v52 | 0.9518 |
| Listeria_monocytogenes_1639_v7                           | Listeria_monocytogenes_1639_v52 | 0.9131 |
| Listeria_monocytogenes_1639_v79                          | Listeria_monocytogenes_1639_v52 | 0.9259 |
| Listeria_monocytogenes_1639_v78                          | Listeria_monocytogenes_1639_v52 | 0.93   |
| Listeria_monocytogenes_1639_v77                          | Listeria_monocytogenes_1639_v52 | 0.9214 |
| Listeria_monocytogenes_1639_v76                          | Listeria_monocytogenes_1639_v52 | 0.9249 |
| Listeria_monocytogenes_1639_v75                          | Listeria_monocytogenes_1639_v52 | 0.9177 |
| Listeria_monocytogenes_1639_v74                          | Listeria_monocytogenes_1639_v52 | 0.9202 |
| Listeria_monocytogenes_1639_v73                          | Listeria_monocytogenes_1639_v52 | 0.925  |
| Listeria_monocytogenes_1639_v72                          | Listeria_monocytogenes_1639_v52 | 0.9795 |
| Listeria_monocytogenes_1639_v71                          | Listeria_monocytogenes_1639_v52 | 0.9141 |
| Listeria_monocytogenes_1639_v70                          | Listeria_monocytogenes_1639_v52 | 0.9219 |
| Listeria_monocytogenes_1639_v6                           | Listeria_monocytogenes_1639_v52 | 0.9128 |
| Listeria_monocytogenes_1639_v69                          | Listeria_monocytogenes_1639_v52 | 0.9642 |
| Listeria_monocytogenes_1639_v68                          | Listeria_monocytogenes_1639_v52 | 0.9291 |
| Listeria_monocytogenes_1639_v67                          | Listeria_monocytogenes_1639_v52 | 0.9452 |
| Listeria_monocytogenes_1639_v66                          | Listeria_monocytogenes_1639_v52 | 0.9295 |
| Listeria_monocytogenes_1639_v65                          | Listeria_monocytogenes_1639_v52 | 0.9318 |
| Listeria_monocytogenes_1639_v64                          | Listeria_monocytogenes_1639_v52 | 0.9229 |
| Listeria_monocytogenes_1639_v63                          | Listeria_monocytogenes_1639_v52 | 0.9414 |
| Listeria_monocytogenes_1639_v62                          | Listeria_monocytogenes_1639_v52 | 0.9269 |
| Listeria_monocytogenes_1639_v61                          | Listeria_monocytogenes_1639_v52 | 0.927  |
| Listeria_monocytogenes_1639_v60                          | Listeria_monocytogenes_1639_v52 | 0.9273 |
| Listeria_monocytogenes_1639_v5                           | Listeria_monocytogenes_1639_v52 | 0.9087 |
| Listeria_monocytogenes_1639_v59                          | Listeria_monocytogenes_1639_v52 | 0.9843 |
| Listeria_monocytogenes_1639_v58                          | Listeria_monocytogenes_1639_v52 | 0.9709 |
| Listeria_monocytogenes_1639_v57                          | Listeria_monocytogenes_1639_v52 | 0.9417 |
| Listeria_monocytogenes_1639_v56                          | Listeria_monocytogenes_1639_v52 | 0.9731 |
| Listeria_monocytogenes_1639_v55                          | Listeria_monocytogenes_1639_v52 | 0.9459 |
| Listeria_monocytogenes_1639_v54                          | Listeria_monocytogenes_1639_v52 | 0.9196 |
| Listeria_monocytogenes_1639_v53                          | Listeria_monocytogenes_1639_v52 | 0.9183 |
| Listeria_monocytogenes_1639_v52                          | Listeria_monocytogenes_1639_v52 | 0.0722 |
| Listeria_welshimeri_1643                                 | Listeria_monocytogenes_1639_v53 | 0.8669 |
| Listeria_welshimeri_serovar_6b_str_SLCC5334_386043       | Listeria_monocytogenes_1639_v53 | 0.8665 |
| Listeria_seeligeri_serovar_1_2b_str_SLCC3954_683837      | Listeria_monocytogenes_1639_v53 | 0.8765 |
| Listeria_seeligeri_FSL_S4-171_702452                     | Listeria_monocytogenes_1639_v53 | 0.8108 |
| Listeria_seeligeri_FSL_N1-067_702453                     | Listeria_monocytogenes_1639_v53 | 0.8255 |
| Listeria_seeligeri_1640_v1                               | Listeria_monocytogenes_1639_v53 | 0.877  |
| Listeria_seeligeri_1640                                  | Listeria_monocytogenes_1639_v53 | 0.8681 |
| Listeria_monocytogenes_WSLC1042_1457188                  | Listeria_monocytogenes_1639_v53 | 0.9284 |
| Listeria_monocytogenes_WSLC1001_1457187                  | Listeria_monocytogenes_1639_v53 | 0.9422 |
| Listeria_monocytogenes_SLCC7179_879090                   | Listeria_monocytogenes_1639_v53 | 0.9523 |
| Listeria_monocytogenes_SLCC5850_882096                   | Listeria_monocytogenes_1639_v53 | 0.9449 |
| Listeria_monocytogenes_SLCC2755_932919                   | Listeria_monocytogenes_1639_v53 | 0.9259 |
| Listeria_monocytogenes_SLCC2540_879089                   | Listeria_monocytogenes_1639_v53 | 0.9388 |
| Listeria_monocytogenes_SLCC2479_882020                   | Listeria_monocytogenes_1639_v53 | 0.9392 |
| Listeria_monocytogenes_SLCC2378_879088                   | Listeria_monocytogenes_1639_v53 | 0.9294 |
| Listeria_monocytogenes_SLCC2376_882097                   | Listeria_monocytogenes_1639_v53 | 0.9327 |
| Listeria_monocytogenes_SLCC2372_932920                   | Listeria_monocytogenes_1639_v53 | 0.9323 |
| Listeria_monocytogenes_serotype_4b_str_LL195_1230340     | Listeria_monocytogenes_1639_v53 | 0.9331 |
| Listeria_monocytogenes_serotype_4b_str_LIS0087_1134669   | Listeria_monocytogenes_1639_v53 | 0.9216 |
| Listeria_monocytogenes_serotype_4b_str_F2365_265669      | Listeria_monocytogenes_1639_v53 | 0.9331 |
| Listeria_monocytogenes_serotype_4b_str_CLIP_80459_568819 | Listeria_monocytogenes_1639_v53 | 0.9353 |
| Listeria_monocytogenes_serotype_4b_str_81-0861_1196161   | Listeria_monocytogenes_1639_v53 | 0.9208 |
| Listeria_monocytogenes_serotype_4b_str_81-0592_1196160   | Listeria_monocytogenes_1639_v53 | 0.9219 |
| Listeria_monocytogenes_serotype_4b_str_81-0558_1196159   | Listeria_monocytogenes_1639_v53 | 0.9222 |
| Listeria_monocytogenes_serotype_4b_str_10-0809_1196162   | Listeria_monocytogenes_1639_v53 | 0.9219 |
| Listeria_monocytogenes_serotype_4b_str_02-6680_1196175   | Listeria_monocytogenes_1639_v53 | 0.932  |
| Listeria_monocytogenes_serotype_4b_str_02-6679_1196174   | Listeria_monocytogenes_1639_v53 | 0.932  |
| Listeria_monocytogenes_serotype_4b_str_02-1792_1196173   | Listeria_monocytogenes_1639_v53 | 0.9219 |
| Listeria_monocytogenes_serotype_4b_str_02-1289_1196172   | Listeria_monocytogenes_1639_v53 | 0.9219 |
| Listeria_monocytogenes_serotype_4b_str_02-1103_1196171   | Listeria_monocytogenes_1639_v53 | 0.9219 |
| Listeria_monocytogenes_serotype_3c_str_10-5027_1196195   | Listeria_monocytogenes_1639_v53 | 0.9396 |
| Listeria_monocytogenes_serotype_1_2c_str_10-5026_1196194 | Listeria_monocytogenes_1639_v53 | 0.9399 |
| Listeria_monocytogenes_serotype_1_2c_str_10-5025_1196193 | Listeria_monocytogenes_1639_v53 | 0.9399 |
| Listeria_monocytogenes_serotype_1_2b_str_10-0811_1196164 | Listeria_monocytogenes_1639_v53 | 0.9212 |
| Listeria_monocytogenes_serotype_1_2b_str_10-0810_1196163 | Listeria_monocytogenes_1639_v53 | 0.9212 |
| Listeria_monocytogenes_serotype_1_2a_str_99-6370_1196179 | Listeria_monocytogenes_1639_v53 | 0.9271 |
| Listeria_monocytogenes_serotype_1_2a_str_98-2035_1196178 | Listeria_monocytogenes_1639_v53 | 0.9271 |
| Listeria_monocytogenes_serotype_1_2a_str_95-0093_1196177 | Listeria_monocytogenes_1639_v53 | 0.9326 |
| Listeria_monocytogenes_serotype_1_2a_str_88-0478_1196176 | Listeria_monocytogenes_1639_v53 | 0.9307 |
| Listeria_monocytogenes_serotype_1_2a_str_10-5024_1196192 | Listeria_monocytogenes_1639_v53 | 0.9326 |

|                                                          |                                 |        |
|----------------------------------------------------------|---------------------------------|--------|
| Listeria_monocytogenes_serotype_1_2a_str_10-4758_1196168 | Listeria_monocytogenes_1639_v53 | 0.9435 |
| Listeria_monocytogenes_serotype_1_2a_str_10-4754_1196167 | Listeria_monocytogenes_1639_v53 | 0.9439 |
| Listeria_monocytogenes_serotype_1_2a_str_10-1321_1196191 | Listeria_monocytogenes_1639_v53 | 0.9326 |
| Listeria_monocytogenes_serotype_1_2a_str_10-1047_1196190 | Listeria_monocytogenes_1639_v53 | 0.9321 |
| Listeria_monocytogenes_serotype_1_2a_str_10-1046_1196189 | Listeria_monocytogenes_1639_v53 | 0.9321 |
| Listeria_monocytogenes_serotype_1_2a_str_10-0934_1196170 | Listeria_monocytogenes_1639_v53 | 0.9546 |
| Listeria_monocytogenes_serotype_1_2a_str_10-0933_1196169 | Listeria_monocytogenes_1639_v53 | 0.9546 |
| Listeria_monocytogenes_serotype_1_2a_str_10-0815_1196188 | Listeria_monocytogenes_1639_v53 | 0.9281 |
| Listeria_monocytogenes_serotype_1_2a_str_10-0814_1196187 | Listeria_monocytogenes_1639_v53 | 0.9326 |
| Listeria_monocytogenes_serotype_1_2a_str_10-0813_1196166 | Listeria_monocytogenes_1639_v53 | 0.939  |
| Listeria_monocytogenes_serotype_1_2a_str_10-0812_1196165 | Listeria_monocytogenes_1639_v53 | 0.939  |
| Listeria_monocytogenes_serotype_1_2a_str_08-7669_1196186 | Listeria_monocytogenes_1639_v53 | 0.9393 |
| Listeria_monocytogenes_serotype_1_2a_str_08-7374_1196185 | Listeria_monocytogenes_1639_v53 | 0.9326 |
| Listeria_monocytogenes_serotype_1_2a_str_08-6997_1196184 | Listeria_monocytogenes_1639_v53 | 0.9281 |
| Listeria_monocytogenes_serotype_1_2a_str_08-6569_1196183 | Listeria_monocytogenes_1639_v53 | 0.9281 |
| Listeria_monocytogenes_serotype_1_2a_str_08-6056_1196182 | Listeria_monocytogenes_1639_v53 | 0.9281 |
| Listeria_monocytogenes_serotype_1_2a_str_04-5457_1196181 | Listeria_monocytogenes_1639_v53 | 0.9326 |
| Listeria_monocytogenes_serotype_1_2a_str_02-5993_1196180 | Listeria_monocytogenes_1639_v53 | 0.9326 |
| Listeria_monocytogenes_R479a_1437838                     | Listeria_monocytogenes_1639_v53 | 0.9334 |
| Listeria_monocytogenes_N53-1_1234142                     | Listeria_monocytogenes_1639_v53 | 0.9029 |
| Listeria_monocytogenes_M7_1030009                        | Listeria_monocytogenes_1639_v53 | 0.8983 |
| Listeria_monocytogenes_LO28_393132                       | Listeria_monocytogenes_1639_v53 | 0.9374 |
| Listeria_monocytogenes_L99_563174                        | Listeria_monocytogenes_1639_v53 | 0.8986 |
| Listeria_monocytogenes_L312_882094                       | Listeria_monocytogenes_1639_v53 | 0.9353 |
| Listeria_monocytogenes_J1816_930781                      | Listeria_monocytogenes_1639_v53 | 0.9148 |
| Listeria_monocytogenes_J1-220_930782                     | Listeria_monocytogenes_1639_v53 | 0.9151 |
| Listeria_monocytogenes_J0161_393130                      | Listeria_monocytogenes_1639_v53 | 0.9467 |
| Listeria_monocytogenes_HCC23_552536                      | Listeria_monocytogenes_1639_v53 | 0.8983 |
| Listeria_monocytogenes_FSL_R2-561_393126                 | Listeria_monocytogenes_1639_v53 | 0.9382 |
| Listeria_monocytogenes_FSL_J1-208_393119                 | Listeria_monocytogenes_1639_v53 | 0.9015 |
| Listeria_monocytogenes_FSL_J1-175_393118                 | Listeria_monocytogenes_1639_v53 | 0.9336 |
| Listeria_monocytogenes_Finland_1998_393127               | Listeria_monocytogenes_1639_v53 | 0.9569 |
| Listeria_monocytogenes_EGD-e_169963_v1                   | Listeria_monocytogenes_1639_v53 | 0.9462 |
| Listeria_monocytogenes_EGD-e_169963                      | Listeria_monocytogenes_1639_v53 | 0.9462 |
| Listeria_monocytogenes_EGD_1334565                       | Listeria_monocytogenes_1639_v53 | 0.9457 |
| Listeria_monocytogenes_CFSAN002349_1299895               | Listeria_monocytogenes_1639_v53 | 0.9336 |
| Listeria_monocytogenes_ATCC_19117_882095_v1              | Listeria_monocytogenes_1639_v53 | 0.9307 |
| Listeria_monocytogenes_ATCC_19117_882095                 | Listeria_monocytogenes_1639_v53 | 0.9303 |
| Listeria_monocytogenes_6179_1288295                      | Listeria_monocytogenes_1639_v53 | 0.9288 |
| Listeria_monocytogenes_1639_v9                           | Listeria_monocytogenes_1639_v53 | 0.9092 |
| Listeria_monocytogenes_1639_v99                          | Listeria_monocytogenes_1639_v53 | 0.9163 |
| Listeria_monocytogenes_1639_v98                          | Listeria_monocytogenes_1639_v53 | 0.934  |
| Listeria_monocytogenes_1639_v97                          | Listeria_monocytogenes_1639_v53 | 0.9239 |
| Listeria_monocytogenes_1639_v96                          | Listeria_monocytogenes_1639_v53 | 0.9152 |
| Listeria_monocytogenes_1639_v95                          | Listeria_monocytogenes_1639_v53 | 0.9153 |
| Listeria_monocytogenes_1639_v94                          | Listeria_monocytogenes_1639_v53 | 0.916  |
| Listeria_monocytogenes_1639_v93                          | Listeria_monocytogenes_1639_v53 | 0.934  |
| Listeria_monocytogenes_1639_v92                          | Listeria_monocytogenes_1639_v53 | 0.9163 |
| Listeria_monocytogenes_1639_v91                          | Listeria_monocytogenes_1639_v53 | 0.9184 |
| Listeria_monocytogenes_1639_v90                          | Listeria_monocytogenes_1639_v53 | 0.934  |
| Listeria_monocytogenes_1639_v8                           | Listeria_monocytogenes_1639_v53 | 0.9206 |
| Listeria_monocytogenes_1639_v89                          | Listeria_monocytogenes_1639_v53 | 0.9258 |
| Listeria_monocytogenes_1639_v88                          | Listeria_monocytogenes_1639_v53 | 0.9391 |
| Listeria_monocytogenes_1639_v87                          | Listeria_monocytogenes_1639_v53 | 0.9345 |
| Listeria_monocytogenes_1639_v86                          | Listeria_monocytogenes_1639_v53 | 0.9345 |
| Listeria_monocytogenes_1639_v85                          | Listeria_monocytogenes_1639_v53 | 0.9202 |
| Listeria_monocytogenes_1639_v84                          | Listeria_monocytogenes_1639_v53 | 0.94   |
| Listeria_monocytogenes_1639_v83                          | Listeria_monocytogenes_1639_v53 | 0.9214 |
| Listeria_monocytogenes_1639_v82                          | Listeria_monocytogenes_1639_v53 | 0.9207 |
| Listeria_monocytogenes_1639_v81                          | Listeria_monocytogenes_1639_v53 | 0.9435 |
| Listeria_monocytogenes_1639_v80                          | Listeria_monocytogenes_1639_v53 | 0.9247 |
| Listeria_monocytogenes_1639_v7                           | Listeria_monocytogenes_1639_v53 | 0.9206 |
| Listeria_monocytogenes_1639_v79                          | Listeria_monocytogenes_1639_v53 | 0.9414 |
| Listeria_monocytogenes_1639_v78                          | Listeria_monocytogenes_1639_v53 | 0.9428 |
| Listeria_monocytogenes_1639_v77                          | Listeria_monocytogenes_1639_v53 | 0.9445 |
| Listeria_monocytogenes_1639_v76                          | Listeria_monocytogenes_1639_v53 | 0.9284 |
| Listeria_monocytogenes_1639_v75                          | Listeria_monocytogenes_1639_v53 | 0.8986 |
| Listeria_monocytogenes_1639_v74                          | Listeria_monocytogenes_1639_v53 | 0.9363 |
| Listeria_monocytogenes_1639_v73                          | Listeria_monocytogenes_1639_v53 | 0.9329 |
| Listeria_monocytogenes_1639_v72                          | Listeria_monocytogenes_1639_v53 | 0.9199 |
| Listeria_monocytogenes_1639_v71                          | Listeria_monocytogenes_1639_v53 | 0.9298 |
| Listeria_monocytogenes_1639_v70                          | Listeria_monocytogenes_1639_v53 | 0.935  |
| Listeria_monocytogenes_1639_v6                           | Listeria_monocytogenes_1639_v53 | 0.9202 |
| Listeria_monocytogenes_1639_v69                          | Listeria_monocytogenes_1639_v53 | 0.9219 |
| Listeria_monocytogenes_1639_v68                          | Listeria_monocytogenes_1639_v53 | 0.948  |
| Listeria_monocytogenes_1639_v67                          | Listeria_monocytogenes_1639_v53 | 0.9263 |
| Listeria_monocytogenes_1639_v66                          | Listeria_monocytogenes_1639_v53 | 0.9447 |
| Listeria_monocytogenes_1639_v65                          | Listeria_monocytogenes_1639_v53 | 0.9342 |
| Listeria_monocytogenes_1639_v64                          | Listeria_monocytogenes_1639_v53 | 0.9664 |
| Listeria_monocytogenes_1639_v63                          | Listeria_monocytogenes_1639_v53 | 0.9212 |
| Listeria_monocytogenes_1639_v62                          | Listeria_monocytogenes_1639_v53 | 0.9378 |
| Listeria_monocytogenes_1639_v61                          | Listeria_monocytogenes_1639_v53 | 0.9338 |
| Listeria_monocytogenes_1639_v60                          | Listeria_monocytogenes_1639_v53 | 0.9491 |
| Listeria_monocytogenes_1639_v5                           | Listeria_monocytogenes_1639_v53 | 0.8906 |
| Listeria_monocytogenes_1639_v59                          | Listeria_monocytogenes_1639_v53 | 0.9229 |
| Listeria_monocytogenes_1639_v58                          | Listeria_monocytogenes_1639_v53 | 0.9232 |
| Listeria_monocytogenes_1639_v57                          | Listeria_monocytogenes_1639_v53 | 0.9123 |
| Listeria_monocytogenes_1639_v56                          | Listeria_monocytogenes_1639_v53 | 0.9221 |
| Listeria_monocytogenes_1639_v55                          | Listeria_monocytogenes_1639_v53 | 0.9089 |
| Listeria_monocytogenes_1639_v54                          | Listeria_monocytogenes_1639_v53 | 0.9163 |
| Listeria_monocytogenes_1639_v53                          | Listeria_monocytogenes_1639_v53 | 0.073  |

|                                                          |                                 |        |
|----------------------------------------------------------|---------------------------------|--------|
| Listeria_welshimeri_1643                                 | Listeria_monocytogenes_1639_v54 | 0.8747 |
| Listeria_welshimeri_serovar_6b_str_SLCC5334_386043       | Listeria_monocytogenes_1639_v54 | 0.8744 |
| Listeria_seeligeri_serovar_1_2b_str_SLCC3954_683837      | Listeria_monocytogenes_1639_v54 | 0.8768 |
| Listeria_seeligeri_FSL_S4-171_702452                     | Listeria_monocytogenes_1639_v54 | 0.8299 |
| Listeria_seeligeri_FSL_N1-067_702453                     | Listeria_monocytogenes_1639_v54 | 0.8341 |
| Listeria_seeligeri_1640_v1                               | Listeria_monocytogenes_1639_v54 | 0.8868 |
| Listeria_seeligeri_1640                                  | Listeria_monocytogenes_1639_v54 | 0.8774 |
| Listeria_monocytogenes_WSLC1042_1457188                  | Listeria_monocytogenes_1639_v54 | 0.9218 |
| Listeria_monocytogenes_WSLC1001_1457187                  | Listeria_monocytogenes_1639_v54 | 0.9183 |
| Listeria_monocytogenes_SLCC7179_879090                   | Listeria_monocytogenes_1639_v54 | 0.9305 |
| Listeria_monocytogenes_SLCC5850_882096                   | Listeria_monocytogenes_1639_v54 | 0.9225 |
| Listeria_monocytogenes_SLCC2755_932919                   | Listeria_monocytogenes_1639_v54 | 0.9148 |
| Listeria_monocytogenes_SLCC2540_879089                   | Listeria_monocytogenes_1639_v54 | 0.916  |
| Listeria_monocytogenes_SLCC2479_882020                   | Listeria_monocytogenes_1639_v54 | 0.9207 |
| Listeria_monocytogenes_SLCC2378_879088                   | Listeria_monocytogenes_1639_v54 | 0.9228 |
| Listeria_monocytogenes_SLCC2376_882097                   | Listeria_monocytogenes_1639_v54 | 0.9253 |
| Listeria_monocytogenes_SLCC2372_932920                   | Listeria_monocytogenes_1639_v54 | 0.9146 |
| Listeria_monocytogenes_serotype_4b_str_LL195_1230340     | Listeria_monocytogenes_1639_v54 | 0.9284 |
| Listeria_monocytogenes_serotype_4b_str_LIS0087_1134669   | Listeria_monocytogenes_1639_v54 | 0.903  |
| Listeria_monocytogenes_serotype_4b_str_F2365_265669      | Listeria_monocytogenes_1639_v54 | 0.9284 |
| Listeria_monocytogenes_serotype_4b_str_CLIP_80459_568819 | Listeria_monocytogenes_1639_v54 | 0.9268 |
| Listeria_monocytogenes_serotype_4b_str_81-0861_1196161   | Listeria_monocytogenes_1639_v54 | 0.9184 |
| Listeria_monocytogenes_serotype_4b_str_81-0592_1196160   | Listeria_monocytogenes_1639_v54 | 0.9195 |
| Listeria_monocytogenes_serotype_4b_str_81-0558_1196159   | Listeria_monocytogenes_1639_v54 | 0.9198 |
| Listeria_monocytogenes_serotype_4b_str_10-0809_1196162   | Listeria_monocytogenes_1639_v54 | 0.9195 |
| Listeria_monocytogenes_serotype_4b_str_02-6680_1196175   | Listeria_monocytogenes_1639_v54 | 0.93   |
| Listeria_monocytogenes_serotype_4b_str_02-6679_1196174   | Listeria_monocytogenes_1639_v54 | 0.93   |
| Listeria_monocytogenes_serotype_4b_str_02-1792_1196173   | Listeria_monocytogenes_1639_v54 | 0.9206 |
| Listeria_monocytogenes_serotype_4b_str_02-1289_1196172   | Listeria_monocytogenes_1639_v54 | 0.9206 |
| Listeria_monocytogenes_serotype_4b_str_02-1103_1196171   | Listeria_monocytogenes_1639_v54 | 0.9206 |
| Listeria_monocytogenes_serotype_3c_str_10-5027_1196195   | Listeria_monocytogenes_1639_v54 | 0.9207 |
| Listeria_monocytogenes_serotype_1_2c_str_10-5026_1196194 | Listeria_monocytogenes_1639_v54 | 0.9215 |
| Listeria_monocytogenes_serotype_1_2c_str_10-5025_1196193 | Listeria_monocytogenes_1639_v54 | 0.9215 |
| Listeria_monocytogenes_serotype_1_2b_str_10-0811_1196164 | Listeria_monocytogenes_1639_v54 | 0.9117 |
| Listeria_monocytogenes_serotype_1_2b_str_10-0810_1196163 | Listeria_monocytogenes_1639_v54 | 0.9117 |
| Listeria_monocytogenes_serotype_1_2a_str_99-6370_1196179 | Listeria_monocytogenes_1639_v54 | 0.9114 |
| Listeria_monocytogenes_serotype_1_2a_str_98-2035_1196178 | Listeria_monocytogenes_1639_v54 | 0.9114 |
| Listeria_monocytogenes_serotype_1_2a_str_95-0093_1196177 | Listeria_monocytogenes_1639_v54 | 0.9168 |
| Listeria_monocytogenes_serotype_1_2a_str_88-0478_1196176 | Listeria_monocytogenes_1639_v54 | 0.9153 |
| Listeria_monocytogenes_serotype_1_2a_str_10-5024_1196192 | Listeria_monocytogenes_1639_v54 | 0.9168 |
| Listeria_monocytogenes_serotype_1_2a_str_10-4758_1196168 | Listeria_monocytogenes_1639_v54 | 0.9192 |
| Listeria_monocytogenes_serotype_1_2a_str_10-4754_1196167 | Listeria_monocytogenes_1639_v54 | 0.9195 |
| Listeria_monocytogenes_serotype_1_2a_str_10-1321_1196191 | Listeria_monocytogenes_1639_v54 | 0.9168 |
| Listeria_monocytogenes_serotype_1_2a_str_10-1047_1196190 | Listeria_monocytogenes_1639_v54 | 0.9171 |
| Listeria_monocytogenes_serotype_1_2a_str_10-1046_1196189 | Listeria_monocytogenes_1639_v54 | 0.9171 |
| Listeria_monocytogenes_serotype_1_2a_str_10-0934_1196170 | Listeria_monocytogenes_1639_v54 | 0.9319 |
| Listeria_monocytogenes_serotype_1_2a_str_10-0933_1196169 | Listeria_monocytogenes_1639_v54 | 0.9319 |
| Listeria_monocytogenes_serotype_1_2a_str_10-0815_1196188 | Listeria_monocytogenes_1639_v54 | 0.9127 |
| Listeria_monocytogenes_serotype_1_2a_str_10-0814_1196187 | Listeria_monocytogenes_1639_v54 | 0.9172 |
| Listeria_monocytogenes_serotype_1_2a_str_10-0813_1196166 | Listeria_monocytogenes_1639_v54 | 0.9212 |
| Listeria_monocytogenes_serotype_1_2a_str_10-0812_1196165 | Listeria_monocytogenes_1639_v54 | 0.9212 |
| Listeria_monocytogenes_serotype_1_2a_str_08-7669_1196186 | Listeria_monocytogenes_1639_v54 | 0.9261 |
| Listeria_monocytogenes_serotype_1_2a_str_08-7374_1196185 | Listeria_monocytogenes_1639_v54 | 0.9168 |
| Listeria_monocytogenes_serotype_1_2a_str_08-6997_1196184 | Listeria_monocytogenes_1639_v54 | 0.9127 |
| Listeria_monocytogenes_serotype_1_2a_str_08-6569_1196183 | Listeria_monocytogenes_1639_v54 | 0.9127 |
| Listeria_monocytogenes_serotype_1_2a_str_08-6056_1196182 | Listeria_monocytogenes_1639_v54 | 0.9127 |
| Listeria_monocytogenes_serotype_1_2a_str_04-5457_1196181 | Listeria_monocytogenes_1639_v54 | 0.9168 |
| Listeria_monocytogenes_serotype_1_2a_str_02-5993_1196180 | Listeria_monocytogenes_1639_v54 | 0.9168 |
| Listeria_monocytogenes_R479a_1437838                     | Listeria_monocytogenes_1639_v54 | 0.9139 |
| Listeria_monocytogenes_N53-1_1234142                     | Listeria_monocytogenes_1639_v54 | 0.8832 |
| Listeria_monocytogenes_M7_1030009                        | Listeria_monocytogenes_1639_v54 | 0.8934 |
| Listeria_monocytogenes_LO28_393132                       | Listeria_monocytogenes_1639_v54 | 0.916  |
| Listeria_monocytogenes_L99_563174                        | Listeria_monocytogenes_1639_v54 | 0.8938 |
| Listeria_monocytogenes_L312_882094                       | Listeria_monocytogenes_1639_v54 | 0.9268 |
| Listeria_monocytogenes_J1816_930781                      | Listeria_monocytogenes_1639_v54 | 0.9224 |
| Listeria_monocytogenes_J1-220_930782                     | Listeria_monocytogenes_1639_v54 | 0.9141 |
| Listeria_monocytogenes_J0161_393130                      | Listeria_monocytogenes_1639_v54 | 0.9254 |
| Listeria_monocytogenes_HCC23_552536                      | Listeria_monocytogenes_1639_v54 | 0.8934 |
| Listeria_monocytogenes_FSL_R2-561_393126                 | Listeria_monocytogenes_1639_v54 | 0.9189 |
| Listeria_monocytogenes_FSL_J1-208_393119                 | Listeria_monocytogenes_1639_v54 | 0.911  |
| Listeria_monocytogenes_FSL_J1-175_393118                 | Listeria_monocytogenes_1639_v54 | 0.9217 |
| Listeria_monocytogenes_Finland_1998_393127               | Listeria_monocytogenes_1639_v54 | 0.9312 |
| Listeria_monocytogenes_EGD-e_169963_v1                   | Listeria_monocytogenes_1639_v54 | 0.9254 |
| Listeria_monocytogenes_EGD-e_169963                      | Listeria_monocytogenes_1639_v54 | 0.9257 |
| Listeria_monocytogenes_EGD_1334565                       | Listeria_monocytogenes_1639_v54 | 0.9232 |
| Listeria_monocytogenes_CFSAN002349_1299895               | Listeria_monocytogenes_1639_v54 | 0.929  |
| Listeria_monocytogenes_ATCC_19117_882095_v1              | Listeria_monocytogenes_1639_v54 | 0.9264 |
| Listeria_monocytogenes_ATCC_19117_882095                 | Listeria_monocytogenes_1639_v54 | 0.926  |
| Listeria_monocytogenes_6179_1288295                      | Listeria_monocytogenes_1639_v54 | 0.9087 |
| Listeria_monocytogenes_1639_v9                           | Listeria_monocytogenes_1639_v54 | 0.9052 |
| Listeria_monocytogenes_1639_v99                          | Listeria_monocytogenes_1639_v54 | 0.9224 |
| Listeria_monocytogenes_1639_v98                          | Listeria_monocytogenes_1639_v54 | 0.9208 |
| Listeria_monocytogenes_1639_v97                          | Listeria_monocytogenes_1639_v54 | 0.9263 |
| Listeria_monocytogenes_1639_v96                          | Listeria_monocytogenes_1639_v54 | 0.9229 |
| Listeria_monocytogenes_1639_v95                          | Listeria_monocytogenes_1639_v54 | 0.9229 |
| Listeria_monocytogenes_1639_v94                          | Listeria_monocytogenes_1639_v54 | 0.9236 |
| Listeria_monocytogenes_1639_v93                          | Listeria_monocytogenes_1639_v54 | 0.9059 |
| Listeria_monocytogenes_1639_v92                          | Listeria_monocytogenes_1639_v54 | 0.9225 |
| Listeria_monocytogenes_1639_v91                          | Listeria_monocytogenes_1639_v54 | 0.9171 |
| Listeria_monocytogenes_1639_v90                          | Listeria_monocytogenes_1639_v54 | 0.9208 |
| Listeria_monocytogenes_1639_v8                           | Listeria_monocytogenes_1639_v54 | 0.9038 |



|                                                          |                                 |        |
|----------------------------------------------------------|---------------------------------|--------|
| Listeria_monocytogenes_1639_v89                          | Listeria_monocytogenes_1639_v54 | 0.9237 |
| Listeria_monocytogenes_1639_v88                          | Listeria_monocytogenes_1639_v54 | 0.9232 |
| Listeria_monocytogenes_1639_v87                          | Listeria_monocytogenes_1639_v54 | 0.916  |
| Listeria_monocytogenes_1639_v86                          | Listeria_monocytogenes_1639_v54 | 0.916  |
| Listeria_monocytogenes_1639_v85                          | Listeria_monocytogenes_1639_v54 | 0.9181 |
| Listeria_monocytogenes_1639_v84                          | Listeria_monocytogenes_1639_v54 | 0.9234 |
| Listeria_monocytogenes_1639_v83                          | Listeria_monocytogenes_1639_v54 | 0.9208 |
| Listeria_monocytogenes_1639_v82                          | Listeria_monocytogenes_1639_v54 | 0.9202 |
| Listeria_monocytogenes_1639_v81                          | Listeria_monocytogenes_1639_v54 | 0.9224 |
| Listeria_monocytogenes_1639_v80                          | Listeria_monocytogenes_1639_v54 | 0.9154 |
| Listeria_monocytogenes_1639_v7                           | Listeria_monocytogenes_1639_v54 | 0.9038 |
| Listeria_monocytogenes_1639_v79                          | Listeria_monocytogenes_1639_v54 | 0.9211 |
| Listeria_monocytogenes_1639_v78                          | Listeria_monocytogenes_1639_v54 | 0.9221 |
| Listeria_monocytogenes_1639_v77                          | Listeria_monocytogenes_1639_v54 | 0.924  |
| Listeria_monocytogenes_1639_v76                          | Listeria_monocytogenes_1639_v54 | 0.9133 |
| Listeria_monocytogenes_1639_v75                          | Listeria_monocytogenes_1639_v54 | 0.8938 |
| Listeria_monocytogenes_1639_v74                          | Listeria_monocytogenes_1639_v54 | 0.9145 |
| Listeria_monocytogenes_1639_v73                          | Listeria_monocytogenes_1639_v54 | 0.9116 |
| Listeria_monocytogenes_1639_v72                          | Listeria_monocytogenes_1639_v54 | 0.9204 |
| Listeria_monocytogenes_1639_v71                          | Listeria_monocytogenes_1639_v54 | 0.9088 |
| Listeria_monocytogenes_1639_v70                          | Listeria_monocytogenes_1639_v54 | 0.9192 |
| Listeria_monocytogenes_1639_v6                           | Listeria_monocytogenes_1639_v54 | 0.9035 |
| Listeria_monocytogenes_1639_v69                          | Listeria_monocytogenes_1639_v54 | 0.9195 |
| Listeria_monocytogenes_1639_v68                          | Listeria_monocytogenes_1639_v54 | 0.919  |
| Listeria_monocytogenes_1639_v67                          | Listeria_monocytogenes_1639_v54 | 0.9224 |
| Listeria_monocytogenes_1639_v66                          | Listeria_monocytogenes_1639_v54 | 0.917  |
| Listeria_monocytogenes_1639_v65                          | Listeria_monocytogenes_1639_v54 | 0.9143 |
| Listeria_monocytogenes_1639_v64                          | Listeria_monocytogenes_1639_v54 | 0.9135 |
| Listeria_monocytogenes_1639_v63                          | Listeria_monocytogenes_1639_v54 | 0.9157 |
| Listeria_monocytogenes_1639_v62                          | Listeria_monocytogenes_1639_v54 | 0.9198 |
| Listeria_monocytogenes_1639_v61                          | Listeria_monocytogenes_1639_v54 | 0.9191 |
| Listeria_monocytogenes_1639_v60                          | Listeria_monocytogenes_1639_v54 | 0.9265 |
| Listeria_monocytogenes_1639_v5                           | Listeria_monocytogenes_1639_v54 | 0.879  |
| Listeria_monocytogenes_1639_v59                          | Listeria_monocytogenes_1639_v54 | 0.9186 |
| Listeria_monocytogenes_1639_v58                          | Listeria_monocytogenes_1639_v54 | 0.9235 |
| Listeria_monocytogenes_1639_v57                          | Listeria_monocytogenes_1639_v54 | 0.9157 |
| Listeria_monocytogenes_1639_v56                          | Listeria_monocytogenes_1639_v54 | 0.9295 |
| Listeria_monocytogenes_1639_v55                          | Listeria_monocytogenes_1639_v54 | 0.9157 |
| Listeria_monocytogenes_1639_v54                          | Listeria_monocytogenes_1639_v54 | 0.0683 |
| Listeria_welshimeri_1643                                 | Listeria_monocytogenes_1639_v55 | 0.8616 |
| Listeria_welshimeri_serovar_6b_str_SLCC5334_386043       | Listeria_monocytogenes_1639_v55 | 0.861  |
| Listeria_seeligeri_serovar_1_2b_str_SLCC3954_683837      | Listeria_monocytogenes_1639_v55 | 0.867  |
| Listeria_seeligeri_FSL_S4-171_702452                     | Listeria_monocytogenes_1639_v55 | 0.8221 |
| Listeria_seeligeri_FSL_N1-067_702453                     | Listeria_monocytogenes_1639_v55 | 0.828  |
| Listeria_seeligeri_1640_v1                               | Listeria_monocytogenes_1639_v55 | 0.875  |
| Listeria_seeligeri_1640                                  | Listeria_monocytogenes_1639_v55 | 0.8788 |
| Listeria_monocytogenes_WSLC1042_1457188                  | Listeria_monocytogenes_1639_v55 | 0.9413 |
| Listeria_monocytogenes_WSLC1001_1457187                  | Listeria_monocytogenes_1639_v55 | 0.916  |
| Listeria_monocytogenes_SLCC7179_879090                   | Listeria_monocytogenes_1639_v55 | 0.9272 |
| Listeria_monocytogenes_SLCC5850_882096                   | Listeria_monocytogenes_1639_v55 | 0.9193 |
| Listeria_monocytogenes_SLCC2755_932919                   | Listeria_monocytogenes_1639_v55 | 0.9332 |
| Listeria_monocytogenes_SLCC2540_879089                   | Listeria_monocytogenes_1639_v55 | 0.927  |
| Listeria_monocytogenes_SLCC2479_882020                   | Listeria_monocytogenes_1639_v55 | 0.9191 |
| Listeria_monocytogenes_SLCC2378_879088                   | Listeria_monocytogenes_1639_v55 | 0.9427 |
| Listeria_monocytogenes_SLCC2376_882097                   | Listeria_monocytogenes_1639_v55 | 0.9209 |
| Listeria_monocytogenes_SLCC2372_932920                   | Listeria_monocytogenes_1639_v55 | 0.9208 |
| Listeria_monocytogenes_serotype_4b_str_LL195_1230340     | Listeria_monocytogenes_1639_v55 | 0.9479 |
| Listeria_monocytogenes_serotype_4b_str_LIS0087_1134669   | Listeria_monocytogenes_1639_v55 | 0.907  |
| Listeria_monocytogenes_serotype_4b_str_F2365_265669      | Listeria_monocytogenes_1639_v55 | 0.9479 |
| Listeria_monocytogenes_serotype_4b_str_CLIP_80459_568819 | Listeria_monocytogenes_1639_v55 | 0.9498 |
| Listeria_monocytogenes_serotype_4b_str_81-0861_1196161   | Listeria_monocytogenes_1639_v55 | 0.9474 |
| Listeria_monocytogenes_serotype_4b_str_81-0592_1196160   | Listeria_monocytogenes_1639_v55 | 0.9484 |
| Listeria_monocytogenes_serotype_4b_str_81-0558_1196159   | Listeria_monocytogenes_1639_v55 | 0.9484 |
| Listeria_monocytogenes_serotype_4b_str_10-0809_1196162   | Listeria_monocytogenes_1639_v55 | 0.9488 |
| Listeria_monocytogenes_serotype_4b_str_02-6680_1196175   | Listeria_monocytogenes_1639_v55 | 0.9469 |
| Listeria_monocytogenes_serotype_4b_str_02-6679_1196174   | Listeria_monocytogenes_1639_v55 | 0.9469 |
| Listeria_monocytogenes_serotype_4b_str_02-1792_1196173   | Listeria_monocytogenes_1639_v55 | 0.9499 |
| Listeria_monocytogenes_serotype_4b_str_02-1289_1196172   | Listeria_monocytogenes_1639_v55 | 0.9499 |
| Listeria_monocytogenes_serotype_4b_str_02-1103_1196171   | Listeria_monocytogenes_1639_v55 | 0.9499 |
| Listeria_monocytogenes_serotype_3c_str_10-5027_1196195   | Listeria_monocytogenes_1639_v55 | 0.9206 |
| Listeria_monocytogenes_serotype_1_2c_str_10-5026_1196194 | Listeria_monocytogenes_1639_v55 | 0.9209 |
| Listeria_monocytogenes_serotype_1_2c_str_10-5025_1196193 | Listeria_monocytogenes_1639_v55 | 0.9209 |
| Listeria_monocytogenes_serotype_1_2b_str_10-0811_1196164 | Listeria_monocytogenes_1639_v55 | 0.9367 |
| Listeria_monocytogenes_serotype_1_2b_str_10-0810_1196163 | Listeria_monocytogenes_1639_v55 | 0.9367 |
| Listeria_monocytogenes_serotype_1_2a_str_99-6370_1196179 | Listeria_monocytogenes_1639_v55 | 0.9107 |
| Listeria_monocytogenes_serotype_1_2a_str_98-2035_1196178 | Listeria_monocytogenes_1639_v55 | 0.9107 |
| Listeria_monocytogenes_serotype_1_2a_str_95-0093_1196177 | Listeria_monocytogenes_1639_v55 | 0.9145 |
| Listeria_monocytogenes_serotype_1_2a_str_88-0478_1196176 | Listeria_monocytogenes_1639_v55 | 0.9145 |
| Listeria_monocytogenes_serotype_1_2a_str_10-5024_1196192 | Listeria_monocytogenes_1639_v55 | 0.9149 |
| Listeria_monocytogenes_serotype_1_2a_str_10-4758_1196168 | Listeria_monocytogenes_1639_v55 | 0.9194 |
| Listeria_monocytogenes_serotype_1_2a_str_10-4754_1196167 | Listeria_monocytogenes_1639_v55 | 0.919  |
| Listeria_monocytogenes_serotype_1_2a_str_10-1321_1196191 | Listeria_monocytogenes_1639_v55 | 0.9149 |
| Listeria_monocytogenes_serotype_1_2a_str_10-1047_1196190 | Listeria_monocytogenes_1639_v55 | 0.9152 |
| Listeria_monocytogenes_serotype_1_2a_str_10-1046_1196189 | Listeria_monocytogenes_1639_v55 | 0.9152 |
| Listeria_monocytogenes_serotype_1_2a_str_10-0934_1196170 | Listeria_monocytogenes_1639_v55 | 0.9252 |
| Listeria_monocytogenes_serotype_1_2a_str_10-0933_1196169 | Listeria_monocytogenes_1639_v55 | 0.9252 |
| Listeria_monocytogenes_serotype_1_2a_str_10-0815_1196188 | Listeria_monocytogenes_1639_v55 | 0.9113 |
| Listeria_monocytogenes_serotype_1_2a_str_10-0814_1196187 | Listeria_monocytogenes_1639_v55 | 0.9149 |
| Listeria_monocytogenes_serotype_1_2a_str_10-0813_1196166 | Listeria_monocytogenes_1639_v55 | 0.9225 |
| Listeria_monocytogenes_serotype_1_2a_str_10-0812_1196165 | Listeria_monocytogenes_1639_v55 | 0.9225 |
| Listeria_monocytogenes_serotype_1_2a_str_08-7669_1196186 | Listeria_monocytogenes_1639_v55 | 0.9225 |

|                                                          |                                 |        |
|----------------------------------------------------------|---------------------------------|--------|
| Listeria_monocytogenes_serotype_1_2a_str_08-7374_1196185 | Listeria_monocytogenes_1639_v55 | 0.9149 |
| Listeria_monocytogenes_serotype_1_2a_str_08-6997_1196184 | Listeria_monocytogenes_1639_v55 | 0.9113 |
| Listeria_monocytogenes_serotype_1_2a_str_08-6569_1196183 | Listeria_monocytogenes_1639_v55 | 0.9113 |
| Listeria_monocytogenes_serotype_1_2a_str_08-6056_1196182 | Listeria_monocytogenes_1639_v55 | 0.9113 |
| Listeria_monocytogenes_serotype_1_2a_str_04-5457_1196181 | Listeria_monocytogenes_1639_v55 | 0.9149 |
| Listeria_monocytogenes_serotype_1_2a_str_02-5993_1196180 | Listeria_monocytogenes_1639_v55 | 0.9145 |
| Listeria_monocytogenes_R479a_1437838                     | Listeria_monocytogenes_1639_v55 | 0.9182 |
| Listeria_monocytogenes_N53-1_1234142                     | Listeria_monocytogenes_1639_v55 | 0.8795 |
| Listeria_monocytogenes_M7_1030009                        | Listeria_monocytogenes_1639_v55 | 0.9044 |
| Listeria_monocytogenes_LO28_393132                       | Listeria_monocytogenes_1639_v55 | 0.9214 |
| Listeria_monocytogenes_L99_563174                        | Listeria_monocytogenes_1639_v55 | 0.9051 |
| Listeria_monocytogenes_L312_882094                       | Listeria_monocytogenes_1639_v55 | 0.9501 |
| Listeria_monocytogenes_J1816_930781                      | Listeria_monocytogenes_1639_v55 | 0.9717 |
| Listeria_monocytogenes_J1-220_930782                     | Listeria_monocytogenes_1639_v55 | 0.9415 |
| Listeria_monocytogenes_J0161_393130                      | Listeria_monocytogenes_1639_v55 | 0.9288 |
| Listeria_monocytogenes_HCC23_552536                      | Listeria_monocytogenes_1639_v55 | 0.9044 |
| Listeria_monocytogenes_FSL_R2-561_393126                 | Listeria_monocytogenes_1639_v55 | 0.917  |
| Listeria_monocytogenes_FSL_J1-208_393119                 | Listeria_monocytogenes_1639_v55 | 0.8955 |
| Listeria_monocytogenes_FSL_J1-175_393118                 | Listeria_monocytogenes_1639_v55 | 0.9327 |
| Listeria_monocytogenes_Finland_1998_393127               | Listeria_monocytogenes_1639_v55 | 0.9259 |
| Listeria_monocytogenes_EGD-e_169963_v1                   | Listeria_monocytogenes_1639_v55 | 0.9277 |
| Listeria_monocytogenes_EGD-e_169963                      | Listeria_monocytogenes_1639_v55 | 0.9281 |
| Listeria_monocytogenes_EGD_1334565                       | Listeria_monocytogenes_1639_v55 | 0.92   |
| Listeria_monocytogenes_CFSAN002349_1299895               | Listeria_monocytogenes_1639_v55 | 0.9548 |
| Listeria_monocytogenes_ATCC_19117_882095_v1              | Listeria_monocytogenes_1639_v55 | 0.9437 |
| Listeria_monocytogenes_ATCC_19117_882095                 | Listeria_monocytogenes_1639_v55 | 0.9436 |
| Listeria_monocytogenes_6179_1288295                      | Listeria_monocytogenes_1639_v55 | 0.92   |
| Listeria_monocytogenes_1639_v9                           | Listeria_monocytogenes_1639_v55 | 0.9252 |
| Listeria_monocytogenes_1639_v99                          | Listeria_monocytogenes_1639_v55 | 0.9916 |
| Listeria_monocytogenes_1639_v98                          | Listeria_monocytogenes_1639_v55 | 0.9283 |
| Listeria_monocytogenes_1639_v97                          | Listeria_monocytogenes_1639_v55 | 0.9545 |
| Listeria_monocytogenes_1639_v96                          | Listeria_monocytogenes_1639_v55 | 0.989  |
| Listeria_monocytogenes_1639_v95                          | Listeria_monocytogenes_1639_v55 | 0.989  |
| Listeria_monocytogenes_1639_v94                          | Listeria_monocytogenes_1639_v55 | 0.989  |
| Listeria_monocytogenes_1639_v93                          | Listeria_monocytogenes_1639_v55 | 0.9094 |
| Listeria_monocytogenes_1639_v92                          | Listeria_monocytogenes_1639_v55 | 0.9905 |
| Listeria_monocytogenes_1639_v91                          | Listeria_monocytogenes_1639_v55 | 0.946  |
| Listeria_monocytogenes_1639_v90                          | Listeria_monocytogenes_1639_v55 | 0.9283 |
| Listeria_monocytogenes_1639_v8                           | Listeria_monocytogenes_1639_v55 | 0.9105 |
| Listeria_monocytogenes_1639_v89                          | Listeria_monocytogenes_1639_v55 | 0.9599 |
| Listeria_monocytogenes_1639_v88                          | Listeria_monocytogenes_1639_v55 | 0.9226 |
| Listeria_monocytogenes_1639_v87                          | Listeria_monocytogenes_1639_v55 | 0.9192 |
| Listeria_monocytogenes_1639_v86                          | Listeria_monocytogenes_1639_v55 | 0.9185 |
| Listeria_monocytogenes_1639_v85                          | Listeria_monocytogenes_1639_v55 | 0.9471 |
| Listeria_monocytogenes_1639_v84                          | Listeria_monocytogenes_1639_v55 | 0.9257 |
| Listeria_monocytogenes_1639_v83                          | Listeria_monocytogenes_1639_v55 | 0.9487 |
| Listeria_monocytogenes_1639_v82                          | Listeria_monocytogenes_1639_v55 | 0.948  |
| Listeria_monocytogenes_1639_v81                          | Listeria_monocytogenes_1639_v55 | 0.9218 |
| Listeria_monocytogenes_1639_v80                          | Listeria_monocytogenes_1639_v55 | 0.9379 |
| Listeria_monocytogenes_1639_v7                           | Listeria_monocytogenes_1639_v55 | 0.9105 |
| Listeria_monocytogenes_1639_v79                          | Listeria_monocytogenes_1639_v55 | 0.9202 |
| Listeria_monocytogenes_1639_v78                          | Listeria_monocytogenes_1639_v55 | 0.9211 |
| Listeria_monocytogenes_1639_v77                          | Listeria_monocytogenes_1639_v55 | 0.9205 |
| Listeria_monocytogenes_1639_v76                          | Listeria_monocytogenes_1639_v55 | 0.9155 |
| Listeria_monocytogenes_1639_v75                          | Listeria_monocytogenes_1639_v55 | 0.9051 |
| Listeria_monocytogenes_1639_v74                          | Listeria_monocytogenes_1639_v55 | 0.9178 |
| Listeria_monocytogenes_1639_v73                          | Listeria_monocytogenes_1639_v55 | 0.924  |
| Listeria_monocytogenes_1639_v72                          | Listeria_monocytogenes_1639_v55 | 0.9461 |
| Listeria_monocytogenes_1639_v71                          | Listeria_monocytogenes_1639_v55 | 0.9096 |
| Listeria_monocytogenes_1639_v70                          | Listeria_monocytogenes_1639_v55 | 0.9209 |
| Listeria_monocytogenes_1639_v6                           | Listeria_monocytogenes_1639_v55 | 0.9098 |
| Listeria_monocytogenes_1639_v69                          | Listeria_monocytogenes_1639_v55 | 0.9488 |
| Listeria_monocytogenes_1639_v68                          | Listeria_monocytogenes_1639_v55 | 0.9225 |
| Listeria_monocytogenes_1639_v67                          | Listeria_monocytogenes_1639_v55 | 0.9333 |
| Listeria_monocytogenes_1639_v66                          | Listeria_monocytogenes_1639_v55 | 0.9147 |
| Listeria_monocytogenes_1639_v65                          | Listeria_monocytogenes_1639_v55 | 0.9209 |
| Listeria_monocytogenes_1639_v64                          | Listeria_monocytogenes_1639_v55 | 0.908  |
| Listeria_monocytogenes_1639_v63                          | Listeria_monocytogenes_1639_v55 | 0.9406 |
| Listeria_monocytogenes_1639_v62                          | Listeria_monocytogenes_1639_v55 | 0.9196 |
| Listeria_monocytogenes_1639_v61                          | Listeria_monocytogenes_1639_v55 | 0.919  |
| Listeria_monocytogenes_1639_v60                          | Listeria_monocytogenes_1639_v55 | 0.9244 |
| Listeria_monocytogenes_1639_v5                           | Listeria_monocytogenes_1639_v55 | 0.9121 |
| Listeria_monocytogenes_1639_v59                          | Listeria_monocytogenes_1639_v55 | 0.938  |
| Listeria_monocytogenes_1639_v58                          | Listeria_monocytogenes_1639_v55 | 0.9476 |
| Listeria_monocytogenes_1639_v57                          | Listeria_monocytogenes_1639_v55 | 0.9642 |
| Listeria_monocytogenes_1639_v56                          | Listeria_monocytogenes_1639_v55 | 0.9491 |
| Listeria_monocytogenes_1639_v55                          | Listeria_monocytogenes_1639_v55 | 0.0789 |
| Listeria_welshimeri_1643                                 | Listeria_monocytogenes_1639_v56 | 0.8839 |
| Listeria_welshimeri_serovar_6b_str_SLCC5334_386043       | Listeria_monocytogenes_1639_v56 | 0.8836 |
| Listeria_seeligeri_serovar_1_2b_str_SLCC3954_683837      | Listeria_monocytogenes_1639_v56 | 0.8796 |
| Listeria_seeligeri_FSL_S4-171_702452                     | Listeria_monocytogenes_1639_v56 | 0.8303 |
| Listeria_seeligeri_FSL_N1-067_702453                     | Listeria_monocytogenes_1639_v56 | 0.8318 |
| Listeria_seeligeri_1640_v1                               | Listeria_monocytogenes_1639_v56 | 0.8849 |
| Listeria_seeligeri_1640                                  | Listeria_monocytogenes_1639_v56 | 0.8778 |
| Listeria_monocytogenes_WSLC1042_1457188                  | Listeria_monocytogenes_1639_v56 | 0.9698 |
| Listeria_monocytogenes_WSLC1001_1457187                  | Listeria_monocytogenes_1639_v56 | 0.9249 |
| Listeria_monocytogenes_SLCC7179_879090                   | Listeria_monocytogenes_1639_v56 | 0.9333 |
| Listeria_monocytogenes_SLCC5850_882096                   | Listeria_monocytogenes_1639_v56 | 0.9291 |
| Listeria_monocytogenes_SLCC2755_932919                   | Listeria_monocytogenes_1639_v56 | 0.9345 |
| Listeria_monocytogenes_SLCC2540_879089                   | Listeria_monocytogenes_1639_v56 | 0.9391 |
| Listeria_monocytogenes_SLCC2479_882020                   | Listeria_monocytogenes_1639_v56 | 0.9257 |

|                                                          |                                 |        |
|----------------------------------------------------------|---------------------------------|--------|
| Listeria_monocytogenes_SLCC2378_879088                   | Listeria_monocytogenes_1639_v56 | 0.9709 |
| Listeria_monocytogenes_SLCC2376_882097                   | Listeria_monocytogenes_1639_v56 | 0.9312 |
| Listeria_monocytogenes_SLCC2372_932920                   | Listeria_monocytogenes_1639_v56 | 0.9185 |
| Listeria_monocytogenes_serotype_4b_str_LL195_1230340     | Listeria_monocytogenes_1639_v56 | 0.9662 |
| Listeria_monocytogenes_serotype_4b_str_LIS0087_1134669   | Listeria_monocytogenes_1639_v56 | 0.9086 |
| Listeria_monocytogenes_serotype_4b_str_F2365_265669      | Listeria_monocytogenes_1639_v56 | 0.9662 |
| Listeria_monocytogenes_serotype_4b_str_CLIP_80459_568819 | Listeria_monocytogenes_1639_v56 | 0.9616 |
| Listeria_monocytogenes_serotype_4b_str_81-0861_1196161   | Listeria_monocytogenes_1639_v56 | 0.9694 |
| Listeria_monocytogenes_serotype_4b_str_81-0592_1196160   | Listeria_monocytogenes_1639_v56 | 0.9705 |
| Listeria_monocytogenes_serotype_4b_str_81-0558_1196159   | Listeria_monocytogenes_1639_v56 | 0.9697 |
| Listeria_monocytogenes_serotype_4b_str_10-0809_1196162   | Listeria_monocytogenes_1639_v56 | 0.9705 |
| Listeria_monocytogenes_serotype_4b_str_02-6680_1196175   | Listeria_monocytogenes_1639_v56 | 0.9681 |
| Listeria_monocytogenes_serotype_4b_str_02-6679_1196174   | Listeria_monocytogenes_1639_v56 | 0.9681 |
| Listeria_monocytogenes_serotype_4b_str_02-1792_1196173   | Listeria_monocytogenes_1639_v56 | 0.9682 |
| Listeria_monocytogenes_serotype_4b_str_02-1289_1196172   | Listeria_monocytogenes_1639_v56 | 0.9682 |
| Listeria_monocytogenes_serotype_4b_str_02-1103_1196171   | Listeria_monocytogenes_1639_v56 | 0.9682 |
| Listeria_monocytogenes_serotype_3c_str_10-5027_1196195   | Listeria_monocytogenes_1639_v56 | 0.9261 |
| Listeria_monocytogenes_serotype_1_2c_str_10-5026_1196194 | Listeria_monocytogenes_1639_v56 | 0.9269 |
| Listeria_monocytogenes_serotype_1_2c_str_10-5025_1196193 | Listeria_monocytogenes_1639_v56 | 0.9269 |
| Listeria_monocytogenes_serotype_1_2b_str_10-0811_1196164 | Listeria_monocytogenes_1639_v56 | 0.9383 |
| Listeria_monocytogenes_serotype_1_2b_str_10-0810_1196163 | Listeria_monocytogenes_1639_v56 | 0.9383 |
| Listeria_monocytogenes_serotype_1_2a_str_99-6370_1196179 | Listeria_monocytogenes_1639_v56 | 0.9179 |
| Listeria_monocytogenes_serotype_1_2a_str_98-2035_1196178 | Listeria_monocytogenes_1639_v56 | 0.9179 |
| Listeria_monocytogenes_serotype_1_2a_str_95-0093_1196177 | Listeria_monocytogenes_1639_v56 | 0.9229 |
| Listeria_monocytogenes_serotype_1_2a_str_88-0478_1196176 | Listeria_monocytogenes_1639_v56 | 0.9218 |
| Listeria_monocytogenes_serotype_1_2a_str_10-5024_1196192 | Listeria_monocytogenes_1639_v56 | 0.9229 |
| Listeria_monocytogenes_serotype_1_2a_str_10-4758_1196168 | Listeria_monocytogenes_1639_v56 | 0.9299 |
| Listeria_monocytogenes_serotype_1_2a_str_10-4754_1196167 | Listeria_monocytogenes_1639_v56 | 0.9303 |
| Listeria_monocytogenes_serotype_1_2a_str_10-1321_1196191 | Listeria_monocytogenes_1639_v56 | 0.9229 |
| Listeria_monocytogenes_serotype_1_2a_str_10-1047_1196190 | Listeria_monocytogenes_1639_v56 | 0.9236 |
| Listeria_monocytogenes_serotype_1_2a_str_10-1046_1196189 | Listeria_monocytogenes_1639_v56 | 0.9236 |
| Listeria_monocytogenes_serotype_1_2a_str_10-0934_1196170 | Listeria_monocytogenes_1639_v56 | 0.9359 |
| Listeria_monocytogenes_serotype_1_2a_str_10-0933_1196169 | Listeria_monocytogenes_1639_v56 | 0.9359 |
| Listeria_monocytogenes_serotype_1_2a_str_10-0815_1196188 | Listeria_monocytogenes_1639_v56 | 0.9188 |
| Listeria_monocytogenes_serotype_1_2a_str_10-0814_1196187 | Listeria_monocytogenes_1639_v56 | 0.9233 |
| Listeria_monocytogenes_serotype_1_2a_str_10-0813_1196166 | Listeria_monocytogenes_1639_v56 | 0.9277 |
| Listeria_monocytogenes_serotype_1_2a_str_10-0812_1196165 | Listeria_monocytogenes_1639_v56 | 0.9277 |
| Listeria_monocytogenes_serotype_1_2a_str_08-7669_1196186 | Listeria_monocytogenes_1639_v56 | 0.9315 |
| Listeria_monocytogenes_serotype_1_2a_str_08-7374_1196185 | Listeria_monocytogenes_1639_v56 | 0.9229 |
| Listeria_monocytogenes_serotype_1_2a_str_08-6997_1196184 | Listeria_monocytogenes_1639_v56 | 0.9188 |
| Listeria_monocytogenes_serotype_1_2a_str_08-6569_1196183 | Listeria_monocytogenes_1639_v56 | 0.9188 |
| Listeria_monocytogenes_serotype_1_2a_str_08-6056_1196182 | Listeria_monocytogenes_1639_v56 | 0.9188 |
| Listeria_monocytogenes_serotype_1_2a_str_04-5457_1196181 | Listeria_monocytogenes_1639_v56 | 0.9229 |
| Listeria_monocytogenes_serotype_1_2a_str_02-5993_1196180 | Listeria_monocytogenes_1639_v56 | 0.9229 |
| Listeria_monocytogenes_R479a_1437838                     | Listeria_monocytogenes_1639_v56 | 0.9207 |
| Listeria_monocytogenes_N53-1_1234142                     | Listeria_monocytogenes_1639_v56 | 0.8865 |
| Listeria_monocytogenes_M7_1030009                        | Listeria_monocytogenes_1639_v56 | 0.9034 |
| Listeria_monocytogenes_LO28_393132                       | Listeria_monocytogenes_1639_v56 | 0.921  |
| Listeria_monocytogenes_L99_563174                        | Listeria_monocytogenes_1639_v56 | 0.9037 |
| Listeria_monocytogenes_L312_882094                       | Listeria_monocytogenes_1639_v56 | 0.9619 |
| Listeria_monocytogenes_J1816_930781                      | Listeria_monocytogenes_1639_v56 | 0.9553 |
| Listeria_monocytogenes_J1-220_930782                     | Listeria_monocytogenes_1639_v56 | 0.9763 |
| Listeria_monocytogenes_J0161_393130                      | Listeria_monocytogenes_1639_v56 | 0.9318 |
| Listeria_monocytogenes_HCC23_552536                      | Listeria_monocytogenes_1639_v56 | 0.903  |
| Listeria_monocytogenes_FSL_R2-561_393126                 | Listeria_monocytogenes_1639_v56 | 0.924  |
| Listeria_monocytogenes_FSL_J1-208_393119                 | Listeria_monocytogenes_1639_v56 | 0.912  |
| Listeria_monocytogenes_FSL_J1-175_393118                 | Listeria_monocytogenes_1639_v56 | 0.9468 |
| Listeria_monocytogenes_Finland_1998_393127               | Listeria_monocytogenes_1639_v56 | 0.9374 |
| Listeria_monocytogenes_EGD-e_169963_v1                   | Listeria_monocytogenes_1639_v56 | 0.9315 |
| Listeria_monocytogenes_EGD-e_169963                      | Listeria_monocytogenes_1639_v56 | 0.9319 |
| Listeria_monocytogenes_EGD_1334565                       | Listeria_monocytogenes_1639_v56 | 0.9298 |
| Listeria_monocytogenes_CFSAN002349_1299895               | Listeria_monocytogenes_1639_v56 | 0.9621 |
| Listeria_monocytogenes_ATCC_19117_882095_v1              | Listeria_monocytogenes_1639_v56 | 0.9886 |
| Listeria_monocytogenes_ATCC_19117_882095                 | Listeria_monocytogenes_1639_v56 | 0.9883 |
| Listeria_monocytogenes_6179_1288295                      | Listeria_monocytogenes_1639_v56 | 0.9184 |
| Listeria_monocytogenes_1639_v9                           | Listeria_monocytogenes_1639_v56 | 0.9282 |
| Listeria_monocytogenes_1639_v99                          | Listeria_monocytogenes_1639_v56 | 0.955  |
| Listeria_monocytogenes_1639_v98                          | Listeria_monocytogenes_1639_v56 | 0.928  |
| Listeria_monocytogenes_1639_v97                          | Listeria_monocytogenes_1639_v56 | 0.9681 |
| Listeria_monocytogenes_1639_v96                          | Listeria_monocytogenes_1639_v56 | 0.9546 |
| Listeria_monocytogenes_1639_v95                          | Listeria_monocytogenes_1639_v56 | 0.9546 |
| Listeria_monocytogenes_1639_v94                          | Listeria_monocytogenes_1639_v56 | 0.955  |
| Listeria_monocytogenes_1639_v93                          | Listeria_monocytogenes_1639_v56 | 0.9165 |
| Listeria_monocytogenes_1639_v92                          | Listeria_monocytogenes_1639_v56 | 0.9561 |
| Listeria_monocytogenes_1639_v91                          | Listeria_monocytogenes_1639_v56 | 0.9568 |
| Listeria_monocytogenes_1639_v90                          | Listeria_monocytogenes_1639_v56 | 0.928  |
| Listeria_monocytogenes_1639_v8                           | Listeria_monocytogenes_1639_v56 | 0.915  |
| Listeria_monocytogenes_1639_v89                          | Listeria_monocytogenes_1639_v56 | 0.9638 |
| Listeria_monocytogenes_1639_v88                          | Listeria_monocytogenes_1639_v56 | 0.9278 |
| Listeria_monocytogenes_1639_v87                          | Listeria_monocytogenes_1639_v56 | 0.9229 |
| Listeria_monocytogenes_1639_v86                          | Listeria_monocytogenes_1639_v56 | 0.9225 |
| Listeria_monocytogenes_1639_v85                          | Listeria_monocytogenes_1639_v56 | 0.9679 |
| Listeria_monocytogenes_1639_v84                          | Listeria_monocytogenes_1639_v56 | 0.9336 |
| Listeria_monocytogenes_1639_v83                          | Listeria_monocytogenes_1639_v56 | 0.9858 |
| Listeria_monocytogenes_1639_v82                          | Listeria_monocytogenes_1639_v56 | 0.985  |
| Listeria_monocytogenes_1639_v81                          | Listeria_monocytogenes_1639_v56 | 0.9297 |
| Listeria_monocytogenes_1639_v80                          | Listeria_monocytogenes_1639_v56 | 0.9419 |
| Listeria_monocytogenes_1639_v7                           | Listeria_monocytogenes_1639_v56 | 0.915  |
| Listeria_monocytogenes_1639_v79                          | Listeria_monocytogenes_1639_v56 | 0.9283 |
| Listeria_monocytogenes_1639_v78                          | Listeria_monocytogenes_1639_v56 | 0.9305 |
| Listeria_monocytogenes_1639_v77                          | Listeria_monocytogenes_1639_v56 | 0.9328 |

|                                                          |                                 |        |
|----------------------------------------------------------|---------------------------------|--------|
| Listeria_monocytogenes_1639_v76                          | Listeria_monocytogenes_1639_v56 | 0.9246 |
| Listeria_monocytogenes_1639_v75                          | Listeria_monocytogenes_1639_v56 | 0.9037 |
| Listeria_monocytogenes_1639_v74                          | Listeria_monocytogenes_1639_v56 | 0.918  |
| Listeria_monocytogenes_1639_v73                          | Listeria_monocytogenes_1639_v56 | 0.9159 |
| Listeria_monocytogenes_1639_v72                          | Listeria_monocytogenes_1639_v56 | 0.9839 |
| Listeria_monocytogenes_1639_v71                          | Listeria_monocytogenes_1639_v56 | 0.9142 |
| Listeria_monocytogenes_1639_v70                          | Listeria_monocytogenes_1639_v56 | 0.9257 |
| Listeria_monocytogenes_1639_v6                           | Listeria_monocytogenes_1639_v56 | 0.9147 |
| Listeria_monocytogenes_1639_v69                          | Listeria_monocytogenes_1639_v56 | 0.9705 |
| Listeria_monocytogenes_1639_v68                          | Listeria_monocytogenes_1639_v56 | 0.936  |
| Listeria_monocytogenes_1639_v67                          | Listeria_monocytogenes_1639_v56 | 0.9473 |
| Listeria_monocytogenes_1639_v66                          | Listeria_monocytogenes_1639_v56 | 0.9259 |
| Listeria_monocytogenes_1639_v65                          | Listeria_monocytogenes_1639_v56 | 0.9223 |
| Listeria_monocytogenes_1639_v64                          | Listeria_monocytogenes_1639_v56 | 0.9208 |
| Listeria_monocytogenes_1639_v63                          | Listeria_monocytogenes_1639_v56 | 0.9412 |
| Listeria_monocytogenes_1639_v62                          | Listeria_monocytogenes_1639_v56 | 0.9281 |
| Listeria_monocytogenes_1639_v61                          | Listeria_monocytogenes_1639_v56 | 0.926  |
| Listeria_monocytogenes_1639_v60                          | Listeria_monocytogenes_1639_v56 | 0.9341 |
| Listeria_monocytogenes_1639_v5                           | Listeria_monocytogenes_1639_v56 | 0.9045 |
| Listeria_monocytogenes_1639_v59                          | Listeria_monocytogenes_1639_v56 | 0.9824 |
| Listeria_monocytogenes_1639_v58                          | Listeria_monocytogenes_1639_v56 | 0.9749 |
| Listeria_monocytogenes_1639_v57                          | Listeria_monocytogenes_1639_v56 | 0.9496 |
| Listeria_monocytogenes_1639_v56                          | Listeria_monocytogenes_1639_v56 | 0.0678 |
| Listeria_welshimeri_1643                                 | Listeria_monocytogenes_1639_v57 | 0.8645 |
| Listeria_welshimeri_serovar_6b_str_SLCC5334_386043       | Listeria_monocytogenes_1639_v57 | 0.8639 |
| Listeria_seeligeri_serovar_1_2b_str_SLCC3954_683837      | Listeria_monocytogenes_1639_v57 | 0.8707 |
| Listeria_seeligeri_FSL_S4-171_702452                     | Listeria_monocytogenes_1639_v57 | 0.8229 |
| Listeria_seeligeri_FSL_N1-067_702453                     | Listeria_monocytogenes_1639_v57 | 0.8277 |
| Listeria_seeligeri_1640_v1                               | Listeria_monocytogenes_1639_v57 | 0.876  |
| Listeria_seeligeri_1640                                  | Listeria_monocytogenes_1639_v57 | 0.8951 |
| Listeria_monocytogenes_WSLC1042_1457188                  | Listeria_monocytogenes_1639_v57 | 0.9455 |
| Listeria_monocytogenes_WSLC1001_1457187                  | Listeria_monocytogenes_1639_v57 | 0.9179 |
| Listeria_monocytogenes_SLCC7179_879090                   | Listeria_monocytogenes_1639_v57 | 0.9235 |
| Listeria_monocytogenes_SLCC5850_882096                   | Listeria_monocytogenes_1639_v57 | 0.9224 |
| Listeria_monocytogenes_SLCC2755_932919                   | Listeria_monocytogenes_1639_v57 | 0.9289 |
| Listeria_monocytogenes_SLCC2540_879089                   | Listeria_monocytogenes_1639_v57 | 0.9312 |
| Listeria_monocytogenes_SLCC2479_882020                   | Listeria_monocytogenes_1639_v57 | 0.9218 |
| Listeria_monocytogenes_SLCC2378_879088                   | Listeria_monocytogenes_1639_v57 | 0.947  |
| Listeria_monocytogenes_SLCC2376_882097                   | Listeria_monocytogenes_1639_v57 | 0.9244 |
| Listeria_monocytogenes_SLCC2372_932920                   | Listeria_monocytogenes_1639_v57 | 0.9147 |
| Listeria_monocytogenes_serotype_4b_str_LL195_1230340     | Listeria_monocytogenes_1639_v57 | 0.9523 |
| Listeria_monocytogenes_serotype_4b_str_LIS0087_1134669   | Listeria_monocytogenes_1639_v57 | 0.9029 |
| Listeria_monocytogenes_serotype_4b_str_F2365_265669      | Listeria_monocytogenes_1639_v57 | 0.9523 |
| Listeria_monocytogenes_serotype_4b_str_CLIP_80459_568819 | Listeria_monocytogenes_1639_v57 | 0.9537 |
| Listeria_monocytogenes_serotype_4b_str_81-0861_1196161   | Listeria_monocytogenes_1639_v57 | 0.942  |
| Listeria_monocytogenes_serotype_4b_str_81-0592_1196160   | Listeria_monocytogenes_1639_v57 | 0.9431 |
| Listeria_monocytogenes_serotype_4b_str_81-0558_1196159   | Listeria_monocytogenes_1639_v57 | 0.943  |
| Listeria_monocytogenes_serotype_4b_str_10-0809_1196162   | Listeria_monocytogenes_1639_v57 | 0.9434 |
| Listeria_monocytogenes_serotype_4b_str_02-6680_1196175   | Listeria_monocytogenes_1639_v57 | 0.9508 |
| Listeria_monocytogenes_serotype_4b_str_02-6679_1196174   | Listeria_monocytogenes_1639_v57 | 0.9508 |
| Listeria_monocytogenes_serotype_4b_str_02-1792_1196173   | Listeria_monocytogenes_1639_v57 | 0.9438 |
| Listeria_monocytogenes_serotype_4b_str_02-1289_1196172   | Listeria_monocytogenes_1639_v57 | 0.9438 |
| Listeria_monocytogenes_serotype_4b_str_02-1103_1196171   | Listeria_monocytogenes_1639_v57 | 0.9438 |
| Listeria_monocytogenes_serotype_3c_str_10-5027_1196195   | Listeria_monocytogenes_1639_v57 | 0.9221 |
| Listeria_monocytogenes_serotype_1_2c_str_10-5026_1196194 | Listeria_monocytogenes_1639_v57 | 0.9228 |
| Listeria_monocytogenes_serotype_1_2c_str_10-5025_1196193 | Listeria_monocytogenes_1639_v57 | 0.9228 |
| Listeria_monocytogenes_serotype_1_2b_str_10-0811_1196164 | Listeria_monocytogenes_1639_v57 | 0.9305 |
| Listeria_monocytogenes_serotype_1_2b_str_10-0810_1196163 | Listeria_monocytogenes_1639_v57 | 0.9305 |
| Listeria_monocytogenes_serotype_1_2a_str_99-6370_1196179 | Listeria_monocytogenes_1639_v57 | 0.9129 |
| Listeria_monocytogenes_serotype_1_2a_str_98-2035_1196178 | Listeria_monocytogenes_1639_v57 | 0.9129 |
| Listeria_monocytogenes_serotype_1_2a_str_95-0093_1196177 | Listeria_monocytogenes_1639_v57 | 0.9172 |
| Listeria_monocytogenes_serotype_1_2a_str_88-0478_1196176 | Listeria_monocytogenes_1639_v57 | 0.9164 |
| Listeria_monocytogenes_serotype_1_2a_str_10-5024_1196192 | Listeria_monocytogenes_1639_v57 | 0.9175 |
| Listeria_monocytogenes_serotype_1_2a_str_10-4758_1196168 | Listeria_monocytogenes_1639_v57 | 0.9225 |
| Listeria_monocytogenes_serotype_1_2a_str_10-4754_1196167 | Listeria_monocytogenes_1639_v57 | 0.9221 |
| Listeria_monocytogenes_serotype_1_2a_str_10-1321_1196191 | Listeria_monocytogenes_1639_v57 | 0.9175 |
| Listeria_monocytogenes_serotype_1_2a_str_10-1047_1196190 | Listeria_monocytogenes_1639_v57 | 0.9178 |
| Listeria_monocytogenes_serotype_1_2a_str_10-1046_1196189 | Listeria_monocytogenes_1639_v57 | 0.9178 |
| Listeria_monocytogenes_serotype_1_2a_str_10-0934_1196170 | Listeria_monocytogenes_1639_v57 | 0.929  |
| Listeria_monocytogenes_serotype_1_2a_str_10-0933_1196169 | Listeria_monocytogenes_1639_v57 | 0.929  |
| Listeria_monocytogenes_serotype_1_2a_str_10-0815_1196188 | Listeria_monocytogenes_1639_v57 | 0.9135 |
| Listeria_monocytogenes_serotype_1_2a_str_10-0814_1196187 | Listeria_monocytogenes_1639_v57 | 0.9175 |
| Listeria_monocytogenes_serotype_1_2a_str_10-0813_1196166 | Listeria_monocytogenes_1639_v57 | 0.9196 |
| Listeria_monocytogenes_serotype_1_2a_str_10-0812_1196165 | Listeria_monocytogenes_1639_v57 | 0.9196 |
| Listeria_monocytogenes_serotype_1_2a_str_08-7669_1196186 | Listeria_monocytogenes_1639_v57 | 0.9252 |
| Listeria_monocytogenes_serotype_1_2a_str_08-7374_1196185 | Listeria_monocytogenes_1639_v57 | 0.9175 |
| Listeria_monocytogenes_serotype_1_2a_str_08-6997_1196184 | Listeria_monocytogenes_1639_v57 | 0.9135 |
| Listeria_monocytogenes_serotype_1_2a_str_08-6569_1196183 | Listeria_monocytogenes_1639_v57 | 0.9135 |
| Listeria_monocytogenes_serotype_1_2a_str_08-6056_1196182 | Listeria_monocytogenes_1639_v57 | 0.9135 |
| Listeria_monocytogenes_serotype_1_2a_str_04-5457_1196181 | Listeria_monocytogenes_1639_v57 | 0.9175 |
| Listeria_monocytogenes_serotype_1_2a_str_02-5993_1196180 | Listeria_monocytogenes_1639_v57 | 0.9172 |
| Listeria_monocytogenes_R479a_1437838                     | Listeria_monocytogenes_1639_v57 | 0.9154 |
| Listeria_monocytogenes_N53-1_1234142                     | Listeria_monocytogenes_1639_v57 | 0.8794 |
| Listeria_monocytogenes_M7_1030009                        | Listeria_monocytogenes_1639_v57 | 0.8997 |
| Listeria_monocytogenes_LO28_393132                       | Listeria_monocytogenes_1639_v57 | 0.9171 |
| Listeria_monocytogenes_L99_563174                        | Listeria_monocytogenes_1639_v57 | 0.9004 |
| Listeria_monocytogenes_L312_882094                       | Listeria_monocytogenes_1639_v57 | 0.9541 |
| Listeria_monocytogenes_J1816_930781                      | Listeria_monocytogenes_1639_v57 | 0.9676 |
| Listeria_monocytogenes_J1-220_930782                     | Listeria_monocytogenes_1639_v57 | 0.9369 |
| Listeria_monocytogenes_J0161_393130                      | Listeria_monocytogenes_1639_v57 | 0.9226 |
| Listeria_monocytogenes_HCC23_552536                      | Listeria_monocytogenes_1639_v57 | 0.8997 |

|                                                          |                                 |        |
|----------------------------------------------------------|---------------------------------|--------|
| Listeria_monocytogenes_FSL_R2-561_393126                 | Listeria_monocytogenes_1639_v57 | 0.9211 |
| Listeria_monocytogenes_FSL_J1-208_393119                 | Listeria_monocytogenes_1639_v57 | 0.8981 |
| Listeria_monocytogenes_FSL_J1-175_393118                 | Listeria_monocytogenes_1639_v57 | 0.9366 |
| Listeria_monocytogenes_Finland_1998_393127               | Listeria_monocytogenes_1639_v57 | 0.9298 |
| Listeria_monocytogenes_EGD-e_169963_v1                   | Listeria_monocytogenes_1639_v57 | 0.9256 |
| Listeria_monocytogenes_EGD-e_169963                      | Listeria_monocytogenes_1639_v57 | 0.9259 |
| Listeria_monocytogenes_EGD_1334565                       | Listeria_monocytogenes_1639_v57 | 0.9231 |
| Listeria_monocytogenes_CFSAN002349_1299895               | Listeria_monocytogenes_1639_v57 | 0.9591 |
| Listeria_monocytogenes_ATCC_19117_882095_v1              | Listeria_monocytogenes_1639_v57 | 0.9479 |
| Listeria_monocytogenes_ATCC_19117_882095                 | Listeria_monocytogenes_1639_v57 | 0.9479 |
| Listeria_monocytogenes_6179_1288295                      | Listeria_monocytogenes_1639_v57 | 0.9106 |
| Listeria_monocytogenes_1639_v9                           | Listeria_monocytogenes_1639_v57 | 0.9427 |
| Listeria_monocytogenes_1639_v99                          | Listeria_monocytogenes_1639_v57 | 0.9709 |
| Listeria_monocytogenes_1639_v98                          | Listeria_monocytogenes_1639_v57 | 0.9236 |
| Listeria_monocytogenes_1639_v97                          | Listeria_monocytogenes_1639_v57 | 0.9614 |
| Listeria_monocytogenes_1639_v96                          | Listeria_monocytogenes_1639_v57 | 0.9687 |
| Listeria_monocytogenes_1639_v95                          | Listeria_monocytogenes_1639_v57 | 0.9687 |
| Listeria_monocytogenes_1639_v94                          | Listeria_monocytogenes_1639_v57 | 0.9687 |
| Listeria_monocytogenes_1639_v93                          | Listeria_monocytogenes_1639_v57 | 0.909  |
| Listeria_monocytogenes_1639_v92                          | Listeria_monocytogenes_1639_v57 | 0.9709 |
| Listeria_monocytogenes_1639_v91                          | Listeria_monocytogenes_1639_v57 | 0.9417 |
| Listeria_monocytogenes_1639_v90                          | Listeria_monocytogenes_1639_v57 | 0.9236 |
| Listeria_monocytogenes_1639_v8                           | Listeria_monocytogenes_1639_v57 | 0.9051 |
| Listeria_monocytogenes_1639_v89                          | Listeria_monocytogenes_1639_v57 | 0.9534 |
| Listeria_monocytogenes_1639_v88                          | Listeria_monocytogenes_1639_v57 | 0.9242 |
| Listeria_monocytogenes_1639_v87                          | Listeria_monocytogenes_1639_v57 | 0.9178 |
| Listeria_monocytogenes_1639_v86                          | Listeria_monocytogenes_1639_v57 | 0.9171 |
| Listeria_monocytogenes_1639_v85                          | Listeria_monocytogenes_1639_v57 | 0.9424 |
| Listeria_monocytogenes_1639_v84                          | Listeria_monocytogenes_1639_v57 | 0.9273 |
| Listeria_monocytogenes_1639_v83                          | Listeria_monocytogenes_1639_v57 | 0.9408 |
| Listeria_monocytogenes_1639_v82                          | Listeria_monocytogenes_1639_v57 | 0.9401 |
| Listeria_monocytogenes_1639_v81                          | Listeria_monocytogenes_1639_v57 | 0.9249 |
| Listeria_monocytogenes_1639_v80                          | Listeria_monocytogenes_1639_v57 | 0.9358 |
| Listeria_monocytogenes_1639_v7                           | Listeria_monocytogenes_1639_v57 | 0.9051 |
| Listeria_monocytogenes_1639_v79                          | Listeria_monocytogenes_1639_v57 | 0.9228 |
| Listeria_monocytogenes_1639_v78                          | Listeria_monocytogenes_1639_v57 | 0.9242 |
| Listeria_monocytogenes_1639_v77                          | Listeria_monocytogenes_1639_v57 | 0.9224 |
| Listeria_monocytogenes_1639_v76                          | Listeria_monocytogenes_1639_v57 | 0.9178 |
| Listeria_monocytogenes_1639_v75                          | Listeria_monocytogenes_1639_v57 | 0.9004 |
| Listeria_monocytogenes_1639_v74                          | Listeria_monocytogenes_1639_v57 | 0.913  |
| Listeria_monocytogenes_1639_v73                          | Listeria_monocytogenes_1639_v57 | 0.9117 |
| Listeria_monocytogenes_1639_v72                          | Listeria_monocytogenes_1639_v57 | 0.9437 |
| Listeria_monocytogenes_1639_v71                          | Listeria_monocytogenes_1639_v57 | 0.9097 |
| Listeria_monocytogenes_1639_v70                          | Listeria_monocytogenes_1639_v57 | 0.9217 |
| Listeria_monocytogenes_1639_v6                           | Listeria_monocytogenes_1639_v57 | 0.9044 |
| Listeria_monocytogenes_1639_v69                          | Listeria_monocytogenes_1639_v57 | 0.9434 |
| Listeria_monocytogenes_1639_v68                          | Listeria_monocytogenes_1639_v57 | 0.9189 |
| Listeria_monocytogenes_1639_v67                          | Listeria_monocytogenes_1639_v57 | 0.9371 |
| Listeria_monocytogenes_1639_v66                          | Listeria_monocytogenes_1639_v57 | 0.92   |
| Listeria_monocytogenes_1639_v65                          | Listeria_monocytogenes_1639_v57 | 0.9169 |
| Listeria_monocytogenes_1639_v64                          | Listeria_monocytogenes_1639_v57 | 0.9102 |
| Listeria_monocytogenes_1639_v63                          | Listeria_monocytogenes_1639_v57 | 0.9352 |
| Listeria_monocytogenes_1639_v62                          | Listeria_monocytogenes_1639_v57 | 0.9219 |
| Listeria_monocytogenes_1639_v61                          | Listeria_monocytogenes_1639_v57 | 0.9209 |
| Listeria_monocytogenes_1639_v60                          | Listeria_monocytogenes_1639_v57 | 0.9234 |
| Listeria_monocytogenes_1639_v5                           | Listeria_monocytogenes_1639_v57 | 0.9207 |
| Listeria_monocytogenes_1639_v59                          | Listeria_monocytogenes_1639_v57 | 0.9403 |
| Listeria_monocytogenes_1639_v58                          | Listeria_monocytogenes_1639_v57 | 0.9459 |
| Listeria_monocytogenes_1639_v57                          | Listeria_monocytogenes_1639_v57 | 0.0667 |
| Listeria_welshimeri_1643                                 | Listeria_monocytogenes_1639_v58 | 0.8836 |
| Listeria_welshimeri_serovar_6b_str_SLCC5334_386043       | Listeria_monocytogenes_1639_v58 | 0.8832 |
| Listeria_seeligeri_serovar_1_2b_str_SLCC3954_683837      | Listeria_monocytogenes_1639_v58 | 0.878  |
| Listeria_seeligeri_FSL_S4-171_702452                     | Listeria_monocytogenes_1639_v58 | 0.826  |
| Listeria_seeligeri_FSL_N1-067_702453                     | Listeria_monocytogenes_1639_v58 | 0.828  |
| Listeria_seeligeri_1640_v1                               | Listeria_monocytogenes_1639_v58 | 0.8891 |
| Listeria_seeligeri_1640                                  | Listeria_monocytogenes_1639_v58 | 0.8846 |
| Listeria_monocytogenes_WSLC1042_1457188                  | Listeria_monocytogenes_1639_v58 | 0.9762 |
| Listeria_monocytogenes_WSLC1001_1457187                  | Listeria_monocytogenes_1639_v58 | 0.9237 |
| Listeria_monocytogenes_SLCC7179_879090                   | Listeria_monocytogenes_1639_v58 | 0.9371 |
| Listeria_monocytogenes_SLCC5850_882096                   | Listeria_monocytogenes_1639_v58 | 0.9287 |
| Listeria_monocytogenes_SLCC2755_932919                   | Listeria_monocytogenes_1639_v58 | 0.936  |
| Listeria_monocytogenes_SLCC2540_879089                   | Listeria_monocytogenes_1639_v58 | 0.9459 |
| Listeria_monocytogenes_SLCC2479_882020                   | Listeria_monocytogenes_1639_v58 | 0.9269 |
| Listeria_monocytogenes_SLCC2378_879088                   | Listeria_monocytogenes_1639_v58 | 0.9773 |
| Listeria_monocytogenes_SLCC2376_882097                   | Listeria_monocytogenes_1639_v58 | 0.9319 |
| Listeria_monocytogenes_SLCC2372_932920                   | Listeria_monocytogenes_1639_v58 | 0.9197 |
| Listeria_monocytogenes_serotype_4b_str_LL195_1230340     | Listeria_monocytogenes_1639_v58 | 0.973  |
| Listeria_monocytogenes_serotype_4b_str_LIS0087_1134669   | Listeria_monocytogenes_1639_v58 | 0.9136 |
| Listeria_monocytogenes_serotype_4b_str_F2365_265669      | Listeria_monocytogenes_1639_v58 | 0.973  |
| Listeria_monocytogenes_serotype_4b_str_CLIP_80459_568819 | Listeria_monocytogenes_1639_v58 | 0.9608 |
| Listeria_monocytogenes_serotype_4b_str_81-0861_1196161   | Listeria_monocytogenes_1639_v58 | 0.9806 |
| Listeria_monocytogenes_serotype_4b_str_81-0592_1196160   | Listeria_monocytogenes_1639_v58 | 0.9817 |
| Listeria_monocytogenes_serotype_4b_str_81-0558_1196159   | Listeria_monocytogenes_1639_v58 | 0.9824 |
| Listeria_monocytogenes_serotype_4b_str_10-0809_1196162   | Listeria_monocytogenes_1639_v58 | 0.9821 |
| Listeria_monocytogenes_serotype_4b_str_02-6680_1196175   | Listeria_monocytogenes_1639_v58 | 0.9654 |
| Listeria_monocytogenes_serotype_4b_str_02-6679_1196174   | Listeria_monocytogenes_1639_v58 | 0.9654 |
| Listeria_monocytogenes_serotype_4b_str_02-1792_1196173   | Listeria_monocytogenes_1639_v58 | 0.9821 |
| Listeria_monocytogenes_serotype_4b_str_02-1289_1196172   | Listeria_monocytogenes_1639_v58 | 0.9821 |
| Listeria_monocytogenes_serotype_4b_str_02-1103_1196171   | Listeria_monocytogenes_1639_v58 | 0.9821 |
| Listeria_monocytogenes_serotype_3c_str_10-5027_1196195   | Listeria_monocytogenes_1639_v58 | 0.9265 |
| Listeria_monocytogenes_serotype_1_2c_str_10-5026_1196194 | Listeria_monocytogenes_1639_v58 | 0.9269 |

|                                                          |                                 |        |
|----------------------------------------------------------|---------------------------------|--------|
| Listeria_monocytogenes_serotype_1_2c_str_10-5025_1196193 | Listeria_monocytogenes_1639_v58 | 0.9269 |
| Listeria_monocytogenes_serotype_1_2b_str_10-0811_1196164 | Listeria_monocytogenes_1639_v58 | 0.9476 |
| Listeria_monocytogenes_serotype_1_2b_str_10-0810_1196163 | Listeria_monocytogenes_1639_v58 | 0.9476 |
| Listeria_monocytogenes_serotype_1_2a_str_99-6370_1196179 | Listeria_monocytogenes_1639_v58 | 0.9123 |
| Listeria_monocytogenes_serotype_1_2a_str_98-2035_1196178 | Listeria_monocytogenes_1639_v58 | 0.9123 |
| Listeria_monocytogenes_serotype_1_2a_str_95-0093_1196177 | Listeria_monocytogenes_1639_v58 | 0.917  |
| Listeria_monocytogenes_serotype_1_2a_str_88-0478_1196176 | Listeria_monocytogenes_1639_v58 | 0.9158 |
| Listeria_monocytogenes_serotype_1_2a_str_10-5024_1196192 | Listeria_monocytogenes_1639_v58 | 0.917  |
| Listeria_monocytogenes_serotype_1_2a_str_10-4758_1196168 | Listeria_monocytogenes_1639_v58 | 0.9284 |
| Listeria_monocytogenes_serotype_1_2a_str_10-4754_1196167 | Listeria_monocytogenes_1639_v58 | 0.9288 |
| Listeria_monocytogenes_serotype_1_2a_str_10-1321_1196191 | Listeria_monocytogenes_1639_v58 | 0.917  |
| Listeria_monocytogenes_serotype_1_2a_str_10-1047_1196190 | Listeria_monocytogenes_1639_v58 | 0.9177 |
| Listeria_monocytogenes_serotype_1_2a_str_10-1046_1196189 | Listeria_monocytogenes_1639_v58 | 0.9177 |
| Listeria_monocytogenes_serotype_1_2a_str_10-0934_1196170 | Listeria_monocytogenes_1639_v58 | 0.9366 |
| Listeria_monocytogenes_serotype_1_2a_str_10-0933_1196169 | Listeria_monocytogenes_1639_v58 | 0.9366 |
| Listeria_monocytogenes_serotype_1_2a_str_10-0815_1196188 | Listeria_monocytogenes_1639_v58 | 0.9129 |
| Listeria_monocytogenes_serotype_1_2a_str_10-0814_1196187 | Listeria_monocytogenes_1639_v58 | 0.9173 |
| Listeria_monocytogenes_serotype_1_2a_str_10-0813_1196166 | Listeria_monocytogenes_1639_v58 | 0.9311 |
| Listeria_monocytogenes_serotype_1_2a_str_10-0812_1196165 | Listeria_monocytogenes_1639_v58 | 0.9311 |
| Listeria_monocytogenes_serotype_1_2a_str_08-7669_1196186 | Listeria_monocytogenes_1639_v58 | 0.9258 |
| Listeria_monocytogenes_serotype_1_2a_str_08-7374_1196185 | Listeria_monocytogenes_1639_v58 | 0.917  |
| Listeria_monocytogenes_serotype_1_2a_str_08-6997_1196184 | Listeria_monocytogenes_1639_v58 | 0.9129 |
| Listeria_monocytogenes_serotype_1_2a_str_08-6569_1196183 | Listeria_monocytogenes_1639_v58 | 0.9129 |
| Listeria_monocytogenes_serotype_1_2a_str_08-6056_1196182 | Listeria_monocytogenes_1639_v58 | 0.9129 |
| Listeria_monocytogenes_serotype_1_2a_str_04-5457_1196181 | Listeria_monocytogenes_1639_v58 | 0.917  |
| Listeria_monocytogenes_serotype_1_2a_str_02-5993_1196180 | Listeria_monocytogenes_1639_v58 | 0.917  |
| Listeria_monocytogenes_R479a_1437838                     | Listeria_monocytogenes_1639_v58 | 0.9137 |
| Listeria_monocytogenes_N53-1_1234142                     | Listeria_monocytogenes_1639_v58 | 0.8901 |
| Listeria_monocytogenes_M7_1030009                        | Listeria_monocytogenes_1639_v58 | 0.9115 |
| Listeria_monocytogenes_LO28_393132                       | Listeria_monocytogenes_1639_v58 | 0.9314 |
| Listeria_monocytogenes_L99_563174                        | Listeria_monocytogenes_1639_v58 | 0.9119 |
| Listeria_monocytogenes_L312_882094                       | Listeria_monocytogenes_1639_v58 | 0.9612 |
| Listeria_monocytogenes_J1816_930781                      | Listeria_monocytogenes_1639_v58 | 0.9494 |
| Listeria_monocytogenes_J1-220_930782                     | Listeria_monocytogenes_1639_v58 | 0.9748 |
| Listeria_monocytogenes_J0161_393130                      | Listeria_monocytogenes_1639_v58 | 0.9307 |
| Listeria_monocytogenes_HCC23_552536                      | Listeria_monocytogenes_1639_v58 | 0.9112 |
| Listeria_monocytogenes_FSL_R2-561_393126                 | Listeria_monocytogenes_1639_v58 | 0.9255 |
| Listeria_monocytogenes_FSL_J1-208_393119                 | Listeria_monocytogenes_1639_v58 | 0.9128 |
| Listeria_monocytogenes_FSL_J1-175_393118                 | Listeria_monocytogenes_1639_v58 | 0.9502 |
| Listeria_monocytogenes_Finland_1998_393127               | Listeria_monocytogenes_1639_v58 | 0.9358 |
| Listeria_monocytogenes_EGD-e_169963_v1                   | Listeria_monocytogenes_1639_v58 | 0.9428 |
| Listeria_monocytogenes_EGD-e_169963                      | Listeria_monocytogenes_1639_v58 | 0.9432 |
| Listeria_monocytogenes_EGD_1334565                       | Listeria_monocytogenes_1639_v58 | 0.9294 |
| Listeria_monocytogenes_CFSAN002349_1299895               | Listeria_monocytogenes_1639_v58 | 0.9655 |
| Listeria_monocytogenes_ATCC_19117_882095_v1              | Listeria_monocytogenes_1639_v58 | 0.9777 |
| Listeria_monocytogenes_ATCC_19117_882095                 | Listeria_monocytogenes_1639_v58 | 0.9773 |
| Listeria_monocytogenes_6179_1288295                      | Listeria_monocytogenes_1639_v58 | 0.9159 |
| Listeria_monocytogenes_1639_v9                           | Listeria_monocytogenes_1639_v58 | 0.9304 |
| Listeria_monocytogenes_1639_v99                          | Listeria_monocytogenes_1639_v58 | 0.9494 |
| Listeria_monocytogenes_1639_v98                          | Listeria_monocytogenes_1639_v58 | 0.9254 |
| Listeria_monocytogenes_1639_v97                          | Listeria_monocytogenes_1639_v58 | 0.9595 |
| Listeria_monocytogenes_1639_v96                          | Listeria_monocytogenes_1639_v58 | 0.9491 |
| Listeria_monocytogenes_1639_v95                          | Listeria_monocytogenes_1639_v58 | 0.9491 |
| Listeria_monocytogenes_1639_v94                          | Listeria_monocytogenes_1639_v58 | 0.9494 |
| Listeria_monocytogenes_1639_v93                          | Listeria_monocytogenes_1639_v58 | 0.9169 |
| Listeria_monocytogenes_1639_v92                          | Listeria_monocytogenes_1639_v58 | 0.9498 |
| Listeria_monocytogenes_1639_v91                          | Listeria_monocytogenes_1639_v58 | 0.9694 |
| Listeria_monocytogenes_1639_v90                          | Listeria_monocytogenes_1639_v58 | 0.9254 |
| Listeria_monocytogenes_1639_v8                           | Listeria_monocytogenes_1639_v58 | 0.907  |
| Listeria_monocytogenes_1639_v89                          | Listeria_monocytogenes_1639_v58 | 0.9657 |
| Listeria_monocytogenes_1639_v88                          | Listeria_monocytogenes_1639_v58 | 0.9237 |
| Listeria_monocytogenes_1639_v87                          | Listeria_monocytogenes_1639_v58 | 0.9266 |
| Listeria_monocytogenes_1639_v86                          | Listeria_monocytogenes_1639_v58 | 0.9262 |
| Listeria_monocytogenes_1639_v85                          | Listeria_monocytogenes_1639_v58 | 0.9847 |
| Listeria_monocytogenes_1639_v84                          | Listeria_monocytogenes_1639_v58 | 0.9254 |
| Listeria_monocytogenes_1639_v83                          | Listeria_monocytogenes_1639_v58 | 0.9794 |
| Listeria_monocytogenes_1639_v82                          | Listeria_monocytogenes_1639_v58 | 0.9787 |
| Listeria_monocytogenes_1639_v81                          | Listeria_monocytogenes_1639_v58 | 0.9226 |
| Listeria_monocytogenes_1639_v80                          | Listeria_monocytogenes_1639_v58 | 0.9498 |
| Listeria_monocytogenes_1639_v7                           | Listeria_monocytogenes_1639_v58 | 0.907  |
| Listeria_monocytogenes_1639_v79                          | Listeria_monocytogenes_1639_v58 | 0.9205 |
| Listeria_monocytogenes_1639_v78                          | Listeria_monocytogenes_1639_v58 | 0.9222 |
| Listeria_monocytogenes_1639_v77                          | Listeria_monocytogenes_1639_v58 | 0.9249 |
| Listeria_monocytogenes_1639_v76                          | Listeria_monocytogenes_1639_v58 | 0.918  |
| Listeria_monocytogenes_1639_v75                          | Listeria_monocytogenes_1639_v58 | 0.9119 |
| Listeria_monocytogenes_1639_v74                          | Listeria_monocytogenes_1639_v58 | 0.9225 |
| Listeria_monocytogenes_1639_v73                          | Listeria_monocytogenes_1639_v58 | 0.9266 |
| Listeria_monocytogenes_1639_v72                          | Listeria_monocytogenes_1639_v58 | 0.9794 |
| Listeria_monocytogenes_1639_v71                          | Listeria_monocytogenes_1639_v58 | 0.9072 |
| Listeria_monocytogenes_1639_v70                          | Listeria_monocytogenes_1639_v58 | 0.9231 |
| Listeria_monocytogenes_1639_v6                           | Listeria_monocytogenes_1639_v58 | 0.9067 |
| Listeria_monocytogenes_1639_v69                          | Listeria_monocytogenes_1639_v58 | 0.9817 |
| Listeria_monocytogenes_1639_v68                          | Listeria_monocytogenes_1639_v58 | 0.9405 |
| Listeria_monocytogenes_1639_v67                          | Listeria_monocytogenes_1639_v58 | 0.9465 |
| Listeria_monocytogenes_1639_v66                          | Listeria_monocytogenes_1639_v58 | 0.9244 |
| Listeria_monocytogenes_1639_v65                          | Listeria_monocytogenes_1639_v58 | 0.9257 |
| Listeria_monocytogenes_1639_v64                          | Listeria_monocytogenes_1639_v58 | 0.9201 |
| Listeria_monocytogenes_1639_v63                          | Listeria_monocytogenes_1639_v58 | 0.9412 |
| Listeria_monocytogenes_1639_v62                          | Listeria_monocytogenes_1639_v58 | 0.9199 |
| Listeria_monocytogenes_1639_v61                          | Listeria_monocytogenes_1639_v58 | 0.9208 |
| Listeria_monocytogenes_1639_v60                          | Listeria_monocytogenes_1639_v58 | 0.9263 |



|                                                          |                                 |        |
|----------------------------------------------------------|---------------------------------|--------|
| Listeria_monocytogenes_1639_v5                           | Listeria_monocytogenes_1639_v58 | 0.9116 |
| Listeria_monocytogenes_1639_v59                          | Listeria_monocytogenes_1639_v58 | 0.9712 |
| Listeria_monocytogenes_1639_v58                          | Listeria_monocytogenes_1639_v58 | 0.0685 |
| Listeria_welshimeri_1643                                 | Listeria_monocytogenes_1639_v59 | 0.8896 |
| Listeria_welshimeri_serovar_6b_str_SLCC5334_386043       | Listeria_monocytogenes_1639_v59 | 0.8889 |
| Listeria_seeligeri_serovar_1_2b_str_SLCC3954_683837      | Listeria_monocytogenes_1639_v59 | 0.8792 |
| Listeria_seeligeri_FSL_S4-171_702452                     | Listeria_monocytogenes_1639_v59 | 0.8216 |
| Listeria_seeligeri_FSL_N1-067_702453                     | Listeria_monocytogenes_1639_v59 | 0.8269 |
| Listeria_seeligeri_1640_v1                               | Listeria_monocytogenes_1639_v59 | 0.8845 |
| Listeria_seeligeri_1640                                  | Listeria_monocytogenes_1639_v59 | 0.874  |
| Listeria_monocytogenes_WSLC1042_1457188                  | Listeria_monocytogenes_1639_v59 | 0.9698 |
| Listeria_monocytogenes_WSLC1001_1457187                  | Listeria_monocytogenes_1639_v59 | 0.9324 |
| Listeria_monocytogenes_SLCC7179_879090                   | Listeria_monocytogenes_1639_v59 | 0.9314 |
| Listeria_monocytogenes_SLCC5850_882096                   | Listeria_monocytogenes_1639_v59 | 0.9358 |
| Listeria_monocytogenes_SLCC2755_932919                   | Listeria_monocytogenes_1639_v59 | 0.9367 |
| Listeria_monocytogenes_SLCC2540_879089                   | Listeria_monocytogenes_1639_v59 | 0.9481 |
| Listeria_monocytogenes_SLCC2479_882020                   | Listeria_monocytogenes_1639_v59 | 0.9239 |
| Listeria_monocytogenes_SLCC2378_879088                   | Listeria_monocytogenes_1639_v59 | 0.9713 |
| Listeria_monocytogenes_SLCC2376_882097                   | Listeria_monocytogenes_1639_v59 | 0.9312 |
| Listeria_monocytogenes_SLCC2372_932920                   | Listeria_monocytogenes_1639_v59 | 0.9171 |
| Listeria_monocytogenes_serotype_4b_str_LL195_1230340     | Listeria_monocytogenes_1639_v59 | 0.9665 |
| Listeria_monocytogenes_serotype_4b_str_LIS0087_1134669   | Listeria_monocytogenes_1639_v59 | 0.9113 |
| Listeria_monocytogenes_serotype_4b_str_F2365_265669      | Listeria_monocytogenes_1639_v59 | 0.9665 |
| Listeria_monocytogenes_serotype_4b_str_CLIP_80459_568819 | Listeria_monocytogenes_1639_v59 | 0.9623 |
| Listeria_monocytogenes_serotype_4b_str_81-0861_1196161   | Listeria_monocytogenes_1639_v59 | 0.9645 |
| Listeria_monocytogenes_serotype_4b_str_81-0592_1196160   | Listeria_monocytogenes_1639_v59 | 0.9656 |
| Listeria_monocytogenes_serotype_4b_str_81-0558_1196159   | Listeria_monocytogenes_1639_v59 | 0.9652 |
| Listeria_monocytogenes_serotype_4b_str_10-0809_1196162   | Listeria_monocytogenes_1639_v59 | 0.9656 |
| Listeria_monocytogenes_serotype_4b_str_02-6680_1196175   | Listeria_monocytogenes_1639_v59 | 0.9681 |
| Listeria_monocytogenes_serotype_4b_str_02-6679_1196174   | Listeria_monocytogenes_1639_v59 | 0.9681 |
| Listeria_monocytogenes_serotype_4b_str_02-1792_1196173   | Listeria_monocytogenes_1639_v59 | 0.9648 |
| Listeria_monocytogenes_serotype_4b_str_02-1289_1196172   | Listeria_monocytogenes_1639_v59 | 0.9648 |
| Listeria_monocytogenes_serotype_4b_str_02-1103_1196171   | Listeria_monocytogenes_1639_v59 | 0.9648 |
| Listeria_monocytogenes_serotype_3c_str_10-5027_1196195   | Listeria_monocytogenes_1639_v59 | 0.9246 |
| Listeria_monocytogenes_serotype_1_2c_str_10-5026_1196194 | Listeria_monocytogenes_1639_v59 | 0.9257 |
| Listeria_monocytogenes_serotype_1_2c_str_10-5025_1196193 | Listeria_monocytogenes_1639_v59 | 0.9257 |
| Listeria_monocytogenes_serotype_1_2b_str_10-0811_1196164 | Listeria_monocytogenes_1639_v59 | 0.9398 |
| Listeria_monocytogenes_serotype_1_2b_str_10-0810_1196163 | Listeria_monocytogenes_1639_v59 | 0.9398 |
| Listeria_monocytogenes_serotype_1_2a_str_99-6370_1196179 | Listeria_monocytogenes_1639_v59 | 0.9164 |
| Listeria_monocytogenes_serotype_1_2a_str_98-2035_1196178 | Listeria_monocytogenes_1639_v59 | 0.9164 |
| Listeria_monocytogenes_serotype_1_2a_str_95-0093_1196177 | Listeria_monocytogenes_1639_v59 | 0.9214 |
| Listeria_monocytogenes_serotype_1_2a_str_88-0478_1196176 | Listeria_monocytogenes_1639_v59 | 0.9206 |
| Listeria_monocytogenes_serotype_1_2a_str_10-5024_1196192 | Listeria_monocytogenes_1639_v59 | 0.9218 |
| Listeria_monocytogenes_serotype_1_2a_str_10-4758_1196168 | Listeria_monocytogenes_1639_v59 | 0.9382 |
| Listeria_monocytogenes_serotype_1_2a_str_10-4754_1196167 | Listeria_monocytogenes_1639_v59 | 0.9382 |
| Listeria_monocytogenes_serotype_1_2a_str_10-1321_1196191 | Listeria_monocytogenes_1639_v59 | 0.9218 |
| Listeria_monocytogenes_serotype_1_2a_str_10-1047_1196190 | Listeria_monocytogenes_1639_v59 | 0.9214 |
| Listeria_monocytogenes_serotype_1_2a_str_10-1046_1196189 | Listeria_monocytogenes_1639_v59 | 0.9214 |
| Listeria_monocytogenes_serotype_1_2a_str_10-0934_1196170 | Listeria_monocytogenes_1639_v59 | 0.9359 |
| Listeria_monocytogenes_serotype_1_2a_str_10-0933_1196169 | Listeria_monocytogenes_1639_v59 | 0.9359 |
| Listeria_monocytogenes_serotype_1_2a_str_10-0815_1196188 | Listeria_monocytogenes_1639_v59 | 0.9174 |
| Listeria_monocytogenes_serotype_1_2a_str_10-0814_1196187 | Listeria_monocytogenes_1639_v59 | 0.9218 |
| Listeria_monocytogenes_serotype_1_2a_str_10-0813_1196166 | Listeria_monocytogenes_1639_v59 | 0.9296 |
| Listeria_monocytogenes_serotype_1_2a_str_10-0812_1196165 | Listeria_monocytogenes_1639_v59 | 0.9296 |
| Listeria_monocytogenes_serotype_1_2a_str_08-7669_1196186 | Listeria_monocytogenes_1639_v59 | 0.9228 |
| Listeria_monocytogenes_serotype_1_2a_str_08-7374_1196185 | Listeria_monocytogenes_1639_v59 | 0.9218 |
| Listeria_monocytogenes_serotype_1_2a_str_08-6997_1196184 | Listeria_monocytogenes_1639_v59 | 0.9174 |
| Listeria_monocytogenes_serotype_1_2a_str_08-6569_1196183 | Listeria_monocytogenes_1639_v59 | 0.9174 |
| Listeria_monocytogenes_serotype_1_2a_str_08-6056_1196182 | Listeria_monocytogenes_1639_v59 | 0.9174 |
| Listeria_monocytogenes_serotype_1_2a_str_04-5457_1196181 | Listeria_monocytogenes_1639_v59 | 0.9218 |
| Listeria_monocytogenes_serotype_1_2a_str_02-5993_1196180 | Listeria_monocytogenes_1639_v59 | 0.9214 |
| Listeria_monocytogenes_R479a_1437838                     | Listeria_monocytogenes_1639_v59 | 0.9185 |
| Listeria_monocytogenes_N53-1_1234142                     | Listeria_monocytogenes_1639_v59 | 0.8836 |
| Listeria_monocytogenes_M7_1030009                        | Listeria_monocytogenes_1639_v59 | 0.9093 |
| Listeria_monocytogenes_LO28_393132                       | Listeria_monocytogenes_1639_v59 | 0.9225 |
| Listeria_monocytogenes_L99_563174                        | Listeria_monocytogenes_1639_v59 | 0.91   |
| Listeria_monocytogenes_L312_882094                       | Listeria_monocytogenes_1639_v59 | 0.9627 |
| Listeria_monocytogenes_J1816_930781                      | Listeria_monocytogenes_1639_v59 | 0.9438 |
| Listeria_monocytogenes_J1-220_930782                     | Listeria_monocytogenes_1639_v59 | 0.9844 |
| Listeria_monocytogenes_J0161_393130                      | Listeria_monocytogenes_1639_v59 | 0.9217 |
| Listeria_monocytogenes_HCC23_552536                      | Listeria_monocytogenes_1639_v59 | 0.9093 |
| Listeria_monocytogenes_FSL_R2-561_393126                 | Listeria_monocytogenes_1639_v59 | 0.9247 |
| Listeria_monocytogenes_FSL_J1-208_393119                 | Listeria_monocytogenes_1639_v59 | 0.912  |
| Listeria_monocytogenes_FSL_J1-175_393118                 | Listeria_monocytogenes_1639_v59 | 0.9555 |
| Listeria_monocytogenes_Finland_1998_393127               | Listeria_monocytogenes_1639_v59 | 0.937  |
| Listeria_monocytogenes_EGD-e_169963_v1                   | Listeria_monocytogenes_1639_v59 | 0.9281 |
| Listeria_monocytogenes_EGD-e_169963                      | Listeria_monocytogenes_1639_v59 | 0.9285 |
| Listeria_monocytogenes_EGD_1334565                       | Listeria_monocytogenes_1639_v59 | 0.9366 |
| Listeria_monocytogenes_CFSAN002349_1299895               | Listeria_monocytogenes_1639_v59 | 0.9617 |
| Listeria_monocytogenes_ATCC_19117_882095_v1              | Listeria_monocytogenes_1639_v59 | 0.9886 |
| Listeria_monocytogenes_ATCC_19117_882095                 | Listeria_monocytogenes_1639_v59 | 0.9886 |
| Listeria_monocytogenes_6179_1288295                      | Listeria_monocytogenes_1639_v59 | 0.9133 |
| Listeria_monocytogenes_1639_v9                           | Listeria_monocytogenes_1639_v59 | 0.9271 |
| Listeria_monocytogenes_1639_v99                          | Listeria_monocytogenes_1639_v59 | 0.9445 |
| Listeria_monocytogenes_1639_v98                          | Listeria_monocytogenes_1639_v59 | 0.919  |
| Listeria_monocytogenes_1639_v97                          | Listeria_monocytogenes_1639_v59 | 0.958  |
| Listeria_monocytogenes_1639_v96                          | Listeria_monocytogenes_1639_v59 | 0.9435 |
| Listeria_monocytogenes_1639_v95                          | Listeria_monocytogenes_1639_v59 | 0.9435 |
| Listeria_monocytogenes_1639_v94                          | Listeria_monocytogenes_1639_v59 | 0.9435 |
| Listeria_monocytogenes_1639_v93                          | Listeria_monocytogenes_1639_v59 | 0.924  |
| Listeria_monocytogenes_1639_v92                          | Listeria_monocytogenes_1639_v59 | 0.9445 |

|                                                          |                                 |        |
|----------------------------------------------------------|---------------------------------|--------|
| Listeria_monocytogenes_1639_v91                          | Listeria_monocytogenes_1639_v59 | 0.9672 |
| Listeria_monocytogenes_1639_v90                          | Listeria_monocytogenes_1639_v59 | 0.919  |
| Listeria_monocytogenes_1639_v8                           | Listeria_monocytogenes_1639_v59 | 0.9125 |
| Listeria_monocytogenes_1639_v89                          | Listeria_monocytogenes_1639_v59 | 0.9608 |
| Listeria_monocytogenes_1639_v88                          | Listeria_monocytogenes_1639_v59 | 0.9241 |
| Listeria_monocytogenes_1639_v87                          | Listeria_monocytogenes_1639_v59 | 0.9269 |
| Listeria_monocytogenes_1639_v86                          | Listeria_monocytogenes_1639_v59 | 0.9262 |
| Listeria_monocytogenes_1639_v85                          | Listeria_monocytogenes_1639_v59 | 0.9638 |
| Listeria_monocytogenes_1639_v84                          | Listeria_monocytogenes_1639_v59 | 0.9314 |
| Listeria_monocytogenes_1639_v83                          | Listeria_monocytogenes_1639_v59 | 0.9809 |
| Listeria_monocytogenes_1639_v82                          | Listeria_monocytogenes_1639_v59 | 0.9802 |
| Listeria_monocytogenes_1639_v81                          | Listeria_monocytogenes_1639_v59 | 0.9285 |
| Listeria_monocytogenes_1639_v80                          | Listeria_monocytogenes_1639_v59 | 0.9464 |
| Listeria_monocytogenes_1639_v7                           | Listeria_monocytogenes_1639_v59 | 0.9125 |
| Listeria_monocytogenes_1639_v79                          | Listeria_monocytogenes_1639_v59 | 0.9238 |
| Listeria_monocytogenes_1639_v78                          | Listeria_monocytogenes_1639_v59 | 0.9278 |
| Listeria_monocytogenes_1639_v77                          | Listeria_monocytogenes_1639_v59 | 0.9227 |
| Listeria_monocytogenes_1639_v76                          | Listeria_monocytogenes_1639_v59 | 0.9228 |
| Listeria_monocytogenes_1639_v75                          | Listeria_monocytogenes_1639_v59 | 0.91   |
| Listeria_monocytogenes_1639_v74                          | Listeria_monocytogenes_1639_v59 | 0.9147 |
| Listeria_monocytogenes_1639_v73                          | Listeria_monocytogenes_1639_v59 | 0.9203 |
| Listeria_monocytogenes_1639_v72                          | Listeria_monocytogenes_1639_v59 | 0.9798 |
| Listeria_monocytogenes_1639_v71                          | Listeria_monocytogenes_1639_v59 | 0.9135 |
| Listeria_monocytogenes_1639_v70                          | Listeria_monocytogenes_1639_v59 | 0.9223 |
| Listeria_monocytogenes_1639_v6                           | Listeria_monocytogenes_1639_v59 | 0.9118 |
| Listeria_monocytogenes_1639_v69                          | Listeria_monocytogenes_1639_v59 | 0.966  |
| Listeria_monocytogenes_1639_v68                          | Listeria_monocytogenes_1639_v59 | 0.9334 |
| Listeria_monocytogenes_1639_v67                          | Listeria_monocytogenes_1639_v59 | 0.9435 |
| Listeria_monocytogenes_1639_v66                          | Listeria_monocytogenes_1639_v59 | 0.9315 |
| Listeria_monocytogenes_1639_v65                          | Listeria_monocytogenes_1639_v59 | 0.9241 |
| Listeria_monocytogenes_1639_v64                          | Listeria_monocytogenes_1639_v59 | 0.9268 |
| Listeria_monocytogenes_1639_v63                          | Listeria_monocytogenes_1639_v59 | 0.9408 |
| Listeria_monocytogenes_1639_v62                          | Listeria_monocytogenes_1639_v59 | 0.924  |
| Listeria_monocytogenes_1639_v61                          | Listeria_monocytogenes_1639_v59 | 0.9237 |
| Listeria_monocytogenes_1639_v60                          | Listeria_monocytogenes_1639_v59 | 0.9236 |
| Listeria_monocytogenes_1639_v5                           | Listeria_monocytogenes_1639_v59 | 0.9019 |
| Listeria_monocytogenes_1639_v59                          | Listeria_monocytogenes_1639_v59 | 0.0682 |
| Listeria_welshimeri_1643                                 | Listeria_monocytogenes_1639_v5  | 0.8325 |
| Listeria_welshimeri_serovar_6b_str_SLCC5334_386043       | Listeria_monocytogenes_1639_v5  | 0.8319 |
| Listeria_seeligeri_serovar_1_2b_str_SLCC3954_683837      | Listeria_monocytogenes_1639_v5  | 0.8432 |
| Listeria_seeligeri_FSL_S4-171_702452                     | Listeria_monocytogenes_1639_v5  | 0.7841 |
| Listeria_seeligeri_FSL_N1-067_702453                     | Listeria_monocytogenes_1639_v5  | 0.8178 |
| Listeria_seeligeri_1640_v1                               | Listeria_monocytogenes_1639_v5  | 0.8476 |
| Listeria_seeligeri_1640                                  | Listeria_monocytogenes_1639_v5  | 0.8617 |
| Listeria_monocytogenes_WSLC1042_1457188                  | Listeria_monocytogenes_1639_v5  | 0.9042 |
| Listeria_monocytogenes_WSLC1001_1457187                  | Listeria_monocytogenes_1639_v5  | 0.892  |
| Listeria_monocytogenes_SLCC7179_879090                   | Listeria_monocytogenes_1639_v5  | 0.9048 |
| Listeria_monocytogenes_SLCC5850_882096                   | Listeria_monocytogenes_1639_v5  | 0.8958 |
| Listeria_monocytogenes_SLCC2755_932919                   | Listeria_monocytogenes_1639_v5  | 0.9306 |
| Listeria_monocytogenes_SLCC2540_879089                   | Listeria_monocytogenes_1639_v5  | 0.9102 |
| Listeria_monocytogenes_SLCC2479_882020                   | Listeria_monocytogenes_1639_v5  | 0.8955 |
| Listeria_monocytogenes_SLCC2378_879088                   | Listeria_monocytogenes_1639_v5  | 0.9055 |
| Listeria_monocytogenes_SLCC2376_882097                   | Listeria_monocytogenes_1639_v5  | 0.8925 |
| Listeria_monocytogenes_SLCC2372_932920                   | Listeria_monocytogenes_1639_v5  | 0.903  |
| Listeria_monocytogenes_serotype_4b_str_LL195_1230340     | Listeria_monocytogenes_1639_v5  | 0.9103 |
| Listeria_monocytogenes_serotype_4b_str_LIS0087_1134669   | Listeria_monocytogenes_1639_v5  | 0.8848 |
| Listeria_monocytogenes_serotype_4b_str_F2365_265669      | Listeria_monocytogenes_1639_v5  | 0.9103 |
| Listeria_monocytogenes_serotype_4b_str_CLIP_80459_568819 | Listeria_monocytogenes_1639_v5  | 0.911  |
| Listeria_monocytogenes_serotype_4b_str_81-0861_1196161   | Listeria_monocytogenes_1639_v5  | 0.9083 |
| Listeria_monocytogenes_serotype_4b_str_81-0592_1196160   | Listeria_monocytogenes_1639_v5  | 0.9093 |
| Listeria_monocytogenes_serotype_4b_str_81-0558_1196159   | Listeria_monocytogenes_1639_v5  | 0.9089 |
| Listeria_monocytogenes_serotype_4b_str_10-0809_1196162   | Listeria_monocytogenes_1639_v5  | 0.9096 |
| Listeria_monocytogenes_serotype_4b_str_02-6680_1196175   | Listeria_monocytogenes_1639_v5  | 0.9068 |
| Listeria_monocytogenes_serotype_4b_str_02-6679_1196174   | Listeria_monocytogenes_1639_v5  | 0.9068 |
| Listeria_monocytogenes_serotype_4b_str_02-1792_1196173   | Listeria_monocytogenes_1639_v5  | 0.91   |
| Listeria_monocytogenes_serotype_4b_str_02-1289_1196172   | Listeria_monocytogenes_1639_v5  | 0.91   |
| Listeria_monocytogenes_serotype_4b_str_02-1103_1196171   | Listeria_monocytogenes_1639_v5  | 0.91   |
| Listeria_monocytogenes_serotype_3c_str_10-5027_1196195   | Listeria_monocytogenes_1639_v5  | 0.8969 |
| Listeria_monocytogenes_serotype_1_2c_str_10-5026_1196194 | Listeria_monocytogenes_1639_v5  | 0.898  |
| Listeria_monocytogenes_serotype_1_2c_str_10-5025_1196193 | Listeria_monocytogenes_1639_v5  | 0.898  |
| Listeria_monocytogenes_serotype_1_2b_str_10-0811_1196164 | Listeria_monocytogenes_1639_v5  | 0.9382 |
| Listeria_monocytogenes_serotype_1_2b_str_10-0810_1196163 | Listeria_monocytogenes_1639_v5  | 0.9382 |
| Listeria_monocytogenes_serotype_1_2a_str_99-6370_1196179 | Listeria_monocytogenes_1639_v5  | 0.8954 |
| Listeria_monocytogenes_serotype_1_2a_str_98-2035_1196178 | Listeria_monocytogenes_1639_v5  | 0.8954 |
| Listeria_monocytogenes_serotype_1_2a_str_95-0093_1196177 | Listeria_monocytogenes_1639_v5  | 0.8913 |
| Listeria_monocytogenes_serotype_1_2a_str_88-0478_1196176 | Listeria_monocytogenes_1639_v5  | 0.8898 |
| Listeria_monocytogenes_serotype_1_2a_str_10-5024_1196192 | Listeria_monocytogenes_1639_v5  | 0.8916 |
| Listeria_monocytogenes_serotype_1_2a_str_10-4758_1196168 | Listeria_monocytogenes_1639_v5  | 0.897  |
| Listeria_monocytogenes_serotype_1_2a_str_10-4754_1196167 | Listeria_monocytogenes_1639_v5  | 0.897  |
| Listeria_monocytogenes_serotype_1_2a_str_10-1321_1196191 | Listeria_monocytogenes_1639_v5  | 0.8916 |
| Listeria_monocytogenes_serotype_1_2a_str_10-1047_1196190 | Listeria_monocytogenes_1639_v5  | 0.8915 |
| Listeria_monocytogenes_serotype_1_2a_str_10-1046_1196189 | Listeria_monocytogenes_1639_v5  | 0.8915 |
| Listeria_monocytogenes_serotype_1_2a_str_10-0934_1196170 | Listeria_monocytogenes_1639_v5  | 0.9009 |
| Listeria_monocytogenes_serotype_1_2a_str_10-0933_1196169 | Listeria_monocytogenes_1639_v5  | 0.9009 |
| Listeria_monocytogenes_serotype_1_2a_str_10-0815_1196188 | Listeria_monocytogenes_1639_v5  | 0.8956 |
| Listeria_monocytogenes_serotype_1_2a_str_10-0814_1196187 | Listeria_monocytogenes_1639_v5  | 0.8916 |
| Listeria_monocytogenes_serotype_1_2a_str_10-0813_1196166 | Listeria_monocytogenes_1639_v5  | 0.9005 |
| Listeria_monocytogenes_serotype_1_2a_str_10-0812_1196165 | Listeria_monocytogenes_1639_v5  | 0.9005 |
| Listeria_monocytogenes_serotype_1_2a_str_08-7669_1196186 | Listeria_monocytogenes_1639_v5  | 0.897  |
| Listeria_monocytogenes_serotype_1_2a_str_08-7374_1196185 | Listeria_monocytogenes_1639_v5  | 0.8916 |
| Listeria_monocytogenes_serotype_1_2a_str_08-6997_1196184 | Listeria_monocytogenes_1639_v5  | 0.8956 |

|                                                          |                                 |        |
|----------------------------------------------------------|---------------------------------|--------|
| Listeria_monocytogenes_serotype_1_2a_str_08-6569_1196183 | Listeria_monocytogenes_1639_v5  | 0.8956 |
| Listeria_monocytogenes_serotype_1_2a_str_08-6056_1196182 | Listeria_monocytogenes_1639_v5  | 0.8956 |
| Listeria_monocytogenes_serotype_1_2a_str_04-5457_1196181 | Listeria_monocytogenes_1639_v5  | 0.8916 |
| Listeria_monocytogenes_serotype_1_2a_str_02-5993_1196180 | Listeria_monocytogenes_1639_v5  | 0.8913 |
| Listeria_monocytogenes_R479a_1437838                     | Listeria_monocytogenes_1639_v5  | 0.9016 |
| Listeria_monocytogenes_N53-1_1234142                     | Listeria_monocytogenes_1639_v5  | 0.8608 |
| Listeria_monocytogenes_M7_1030009                        | Listeria_monocytogenes_1639_v5  | 0.8751 |
| Listeria_monocytogenes_LO28_393132                       | Listeria_monocytogenes_1639_v5  | 0.9014 |
| Listeria_monocytogenes_L99_563174                        | Listeria_monocytogenes_1639_v5  | 0.8758 |
| Listeria_monocytogenes_L312_882094                       | Listeria_monocytogenes_1639_v5  | 0.9113 |
| Listeria_monocytogenes_J1816_930781                      | Listeria_monocytogenes_1639_v5  | 0.9018 |
| Listeria_monocytogenes_J1-220_930782                     | Listeria_monocytogenes_1639_v5  | 0.9043 |
| Listeria_monocytogenes_J0161_393130                      | Listeria_monocytogenes_1639_v5  | 0.9017 |
| Listeria_monocytogenes_HCC23_552536                      | Listeria_monocytogenes_1639_v5  | 0.8751 |
| Listeria_monocytogenes_FSL_R2-561_393126                 | Listeria_monocytogenes_1639_v5  | 0.8949 |
| Listeria_monocytogenes_FSL_J1-208_393119                 | Listeria_monocytogenes_1639_v5  | 0.8658 |
| Listeria_monocytogenes_FSL_J1-175_393118                 | Listeria_monocytogenes_1639_v5  | 0.9114 |
| Listeria_monocytogenes_Finland_1998_393127               | Listeria_monocytogenes_1639_v5  | 0.9016 |
| Listeria_monocytogenes_EGD-e_169963_v1                   | Listeria_monocytogenes_1639_v5  | 0.9069 |
| Listeria_monocytogenes_EGD-e_169963                      | Listeria_monocytogenes_1639_v5  | 0.9073 |
| Listeria_monocytogenes_EGD_1334565                       | Listeria_monocytogenes_1639_v5  | 0.8965 |
| Listeria_monocytogenes_CFSAN002349_1299895               | Listeria_monocytogenes_1639_v5  | 0.9127 |
| Listeria_monocytogenes_ATCC_19117_882095_v1              | Listeria_monocytogenes_1639_v5  | 0.9071 |
| Listeria_monocytogenes_ATCC_19117_882095                 | Listeria_monocytogenes_1639_v5  | 0.907  |
| Listeria_monocytogenes_6179_1288295                      | Listeria_monocytogenes_1639_v5  | 0.9009 |
| Listeria_monocytogenes_1639_v9                           | Listeria_monocytogenes_1639_v5  | 0.9219 |
| Listeria_monocytogenes_1639_v99                          | Listeria_monocytogenes_1639_v5  | 0.9128 |
| Listeria_monocytogenes_1639_v98                          | Listeria_monocytogenes_1639_v5  | 0.9087 |
| Listeria_monocytogenes_1639_v97                          | Listeria_monocytogenes_1639_v5  | 0.9043 |
| Listeria_monocytogenes_1639_v96                          | Listeria_monocytogenes_1639_v5  | 0.9122 |
| Listeria_monocytogenes_1639_v95                          | Listeria_monocytogenes_1639_v5  | 0.9122 |
| Listeria_monocytogenes_1639_v94                          | Listeria_monocytogenes_1639_v5  | 0.9122 |
| Listeria_monocytogenes_1639_v93                          | Listeria_monocytogenes_1639_v5  | 0.9    |
| Listeria_monocytogenes_1639_v92                          | Listeria_monocytogenes_1639_v5  | 0.9129 |
| Listeria_monocytogenes_1639_v91                          | Listeria_monocytogenes_1639_v5  | 0.9063 |
| Listeria_monocytogenes_1639_v90                          | Listeria_monocytogenes_1639_v5  | 0.9087 |
| Listeria_monocytogenes_1639_v8                           | Listeria_monocytogenes_1639_v5  | 0.9114 |
| Listeria_monocytogenes_1639_v89                          | Listeria_monocytogenes_1639_v5  | 0.9147 |
| Listeria_monocytogenes_1639_v88                          | Listeria_monocytogenes_1639_v5  | 0.896  |
| Listeria_monocytogenes_1639_v87                          | Listeria_monocytogenes_1639_v5  | 0.8964 |
| Listeria_monocytogenes_1639_v86                          | Listeria_monocytogenes_1639_v5  | 0.896  |
| Listeria_monocytogenes_1639_v85                          | Listeria_monocytogenes_1639_v5  | 0.9091 |
| Listeria_monocytogenes_1639_v84                          | Listeria_monocytogenes_1639_v5  | 0.8954 |
| Listeria_monocytogenes_1639_v83                          | Listeria_monocytogenes_1639_v5  | 0.9113 |
| Listeria_monocytogenes_1639_v82                          | Listeria_monocytogenes_1639_v5  | 0.911  |
| Listeria_monocytogenes_1639_v81                          | Listeria_monocytogenes_1639_v5  | 0.8935 |
| Listeria_monocytogenes_1639_v80                          | Listeria_monocytogenes_1639_v5  | 0.9355 |
| Listeria_monocytogenes_1639_v7                           | Listeria_monocytogenes_1639_v5  | 0.9114 |
| Listeria_monocytogenes_1639_v79                          | Listeria_monocytogenes_1639_v5  | 0.8919 |
| Listeria_monocytogenes_1639_v78                          | Listeria_monocytogenes_1639_v5  | 0.8935 |
| Listeria_monocytogenes_1639_v77                          | Listeria_monocytogenes_1639_v5  | 0.891  |
| Listeria_monocytogenes_1639_v76                          | Listeria_monocytogenes_1639_v5  | 0.8982 |
| Listeria_monocytogenes_1639_v75                          | Listeria_monocytogenes_1639_v5  | 0.8758 |
| Listeria_monocytogenes_1639_v74                          | Listeria_monocytogenes_1639_v5  | 0.9195 |
| Listeria_monocytogenes_1639_v73                          | Listeria_monocytogenes_1639_v5  | 0.9061 |
| Listeria_monocytogenes_1639_v72                          | Listeria_monocytogenes_1639_v5  | 0.9066 |
| Listeria_monocytogenes_1639_v71                          | Listeria_monocytogenes_1639_v5  | 0.9063 |
| Listeria_monocytogenes_1639_v70                          | Listeria_monocytogenes_1639_v5  | 0.8963 |
| Listeria_monocytogenes_1639_v6                           | Listeria_monocytogenes_1639_v5  | 0.9107 |
| Listeria_monocytogenes_1639_v69                          | Listeria_monocytogenes_1639_v5  | 0.9096 |
| Listeria_monocytogenes_1639_v68                          | Listeria_monocytogenes_1639_v5  | 0.8999 |
| Listeria_monocytogenes_1639_v67                          | Listeria_monocytogenes_1639_v5  | 0.9113 |
| Listeria_monocytogenes_1639_v66                          | Listeria_monocytogenes_1639_v5  | 0.8939 |
| Listeria_monocytogenes_1639_v65                          | Listeria_monocytogenes_1639_v5  | 0.9058 |
| Listeria_monocytogenes_1639_v64                          | Listeria_monocytogenes_1639_v5  | 0.8968 |
| Listeria_monocytogenes_1639_v63                          | Listeria_monocytogenes_1639_v5  | 0.93   |
| Listeria_monocytogenes_1639_v62                          | Listeria_monocytogenes_1639_v5  | 0.9    |
| Listeria_monocytogenes_1639_v61                          | Listeria_monocytogenes_1639_v5  | 0.8944 |
| Listeria_monocytogenes_1639_v60                          | Listeria_monocytogenes_1639_v5  | 0.8966 |
| Listeria_monocytogenes_1639_v5                           | Listeria_monocytogenes_1639_v5  | 0.0808 |
| Listeria_welshimeri_1643                                 | Listeria_monocytogenes_1639_v60 | 0.868  |
| Listeria_welshimeri_serovar_6b_str_SLCC5334_386043       | Listeria_monocytogenes_1639_v60 | 0.8674 |
| Listeria_seeligeri_serovar_1_2b_str_SLCC3954_683837      | Listeria_monocytogenes_1639_v60 | 0.8808 |
| Listeria_seeligeri_FSL_S4-171_702452                     | Listeria_monocytogenes_1639_v60 | 0.8218 |
| Listeria_seeligeri_FSL_N1-067_702453                     | Listeria_monocytogenes_1639_v60 | 0.8395 |
| Listeria_seeligeri_1640_v1                               | Listeria_monocytogenes_1639_v60 | 0.877  |
| Listeria_seeligeri_1640                                  | Listeria_monocytogenes_1639_v60 | 0.8775 |
| Listeria_monocytogenes_WSLC1042_1457188                  | Listeria_monocytogenes_1639_v60 | 0.9242 |
| Listeria_monocytogenes_WSLC1001_1457187                  | Listeria_monocytogenes_1639_v60 | 0.9452 |
| Listeria_monocytogenes_SLCC7179_879090                   | Listeria_monocytogenes_1639_v60 | 0.9553 |
| Listeria_monocytogenes_SLCC5850_882096                   | Listeria_monocytogenes_1639_v60 | 0.9479 |
| Listeria_monocytogenes_SLCC2755_932919                   | Listeria_monocytogenes_1639_v60 | 0.9297 |
| Listeria_monocytogenes_SLCC2540_879089                   | Listeria_monocytogenes_1639_v60 | 0.9316 |
| Listeria_monocytogenes_SLCC2479_882020                   | Listeria_monocytogenes_1639_v60 | 0.9478 |
| Listeria_monocytogenes_SLCC2378_879088                   | Listeria_monocytogenes_1639_v60 | 0.9256 |
| Listeria_monocytogenes_SLCC2376_882097                   | Listeria_monocytogenes_1639_v60 | 0.9293 |
| Listeria_monocytogenes_SLCC2372_932920                   | Listeria_monocytogenes_1639_v60 | 0.9412 |
| Listeria_monocytogenes_serotype_4b_str_LL195_1230340     | Listeria_monocytogenes_1639_v60 | 0.9312 |
| Listeria_monocytogenes_serotype_4b_str_LIS0087_1134669   | Listeria_monocytogenes_1639_v60 | 0.9288 |
| Listeria_monocytogenes_serotype_4b_str_F2365_265669      | Listeria_monocytogenes_1639_v60 | 0.9312 |
| Listeria_monocytogenes_serotype_4b_str_CLIP_80459_568819 | Listeria_monocytogenes_1639_v60 | 0.938  |

|                                                          |                                 |        |
|----------------------------------------------------------|---------------------------------|--------|
| Listeria_monocytogenes_serotype_4b_str_81-0861_1196161   | Listeria_monocytogenes_1639_v60 | 0.925  |
| Listeria_monocytogenes_serotype_4b_str_81-0592_1196160   | Listeria_monocytogenes_1639_v60 | 0.926  |
| Listeria_monocytogenes_serotype_4b_str_81-0558_1196159   | Listeria_monocytogenes_1639_v60 | 0.9267 |
| Listeria_monocytogenes_serotype_4b_str_10-0809_1196162   | Listeria_monocytogenes_1639_v60 | 0.926  |
| Listeria_monocytogenes_serotype_4b_str_02-6680_1196175   | Listeria_monocytogenes_1639_v60 | 0.9328 |
| Listeria_monocytogenes_serotype_4b_str_02-6679_1196174   | Listeria_monocytogenes_1639_v60 | 0.9328 |
| Listeria_monocytogenes_serotype_4b_str_02-1792_1196173   | Listeria_monocytogenes_1639_v60 | 0.9268 |
| Listeria_monocytogenes_serotype_4b_str_02-1289_1196172   | Listeria_monocytogenes_1639_v60 | 0.9268 |
| Listeria_monocytogenes_serotype_4b_str_02-1103_1196171   | Listeria_monocytogenes_1639_v60 | 0.9268 |
| Listeria_monocytogenes_serotype_3c_str_10-5027_1196195   | Listeria_monocytogenes_1639_v60 | 0.9489 |
| Listeria_monocytogenes_serotype_1_2c_str_10-5026_1196194 | Listeria_monocytogenes_1639_v60 | 0.9496 |
| Listeria_monocytogenes_serotype_1_2c_str_10-5025_1196193 | Listeria_monocytogenes_1639_v60 | 0.9496 |
| Listeria_monocytogenes_serotype_1_2b_str_10-0811_1196164 | Listeria_monocytogenes_1639_v60 | 0.9294 |
| Listeria_monocytogenes_serotype_1_2b_str_10-0810_1196163 | Listeria_monocytogenes_1639_v60 | 0.9294 |
| Listeria_monocytogenes_serotype_1_2a_str_99-6370_1196179 | Listeria_monocytogenes_1639_v60 | 0.9382 |
| Listeria_monocytogenes_serotype_1_2a_str_98-2035_1196178 | Listeria_monocytogenes_1639_v60 | 0.9382 |
| Listeria_monocytogenes_serotype_1_2a_str_95-0093_1196177 | Listeria_monocytogenes_1639_v60 | 0.9433 |
| Listeria_monocytogenes_serotype_1_2a_str_88-0478_1196176 | Listeria_monocytogenes_1639_v60 | 0.9448 |
| Listeria_monocytogenes_serotype_1_2a_str_10-5024_1196192 | Listeria_monocytogenes_1639_v60 | 0.9437 |
| Listeria_monocytogenes_serotype_1_2a_str_10-4758_1196168 | Listeria_monocytogenes_1639_v60 | 0.9473 |
| Listeria_monocytogenes_serotype_1_2a_str_10-4754_1196167 | Listeria_monocytogenes_1639_v60 | 0.9473 |
| Listeria_monocytogenes_serotype_1_2a_str_10-1321_1196191 | Listeria_monocytogenes_1639_v60 | 0.9437 |
| Listeria_monocytogenes_serotype_1_2a_str_10-1047_1196190 | Listeria_monocytogenes_1639_v60 | 0.9448 |
| Listeria_monocytogenes_serotype_1_2a_str_10-1046_1196189 | Listeria_monocytogenes_1639_v60 | 0.9448 |
| Listeria_monocytogenes_serotype_1_2a_str_10-0934_1196170 | Listeria_monocytogenes_1639_v60 | 0.955  |
| Listeria_monocytogenes_serotype_1_2a_str_10-0933_1196169 | Listeria_monocytogenes_1639_v60 | 0.955  |
| Listeria_monocytogenes_serotype_1_2a_str_10-0815_1196188 | Listeria_monocytogenes_1639_v60 | 0.9388 |
| Listeria_monocytogenes_serotype_1_2a_str_10-0814_1196187 | Listeria_monocytogenes_1639_v60 | 0.9433 |
| Listeria_monocytogenes_serotype_1_2a_str_10-0813_1196166 | Listeria_monocytogenes_1639_v60 | 0.9502 |
| Listeria_monocytogenes_serotype_1_2a_str_10-0812_1196165 | Listeria_monocytogenes_1639_v60 | 0.9502 |
| Listeria_monocytogenes_serotype_1_2a_str_08-7669_1196186 | Listeria_monocytogenes_1639_v60 | 0.9525 |
| Listeria_monocytogenes_serotype_1_2a_str_08-7374_1196185 | Listeria_monocytogenes_1639_v60 | 0.9437 |
| Listeria_monocytogenes_serotype_1_2a_str_08-6997_1196184 | Listeria_monocytogenes_1639_v60 | 0.9388 |
| Listeria_monocytogenes_serotype_1_2a_str_08-6569_1196183 | Listeria_monocytogenes_1639_v60 | 0.9388 |
| Listeria_monocytogenes_serotype_1_2a_str_08-6056_1196182 | Listeria_monocytogenes_1639_v60 | 0.9388 |
| Listeria_monocytogenes_serotype_1_2a_str_04-5457_1196181 | Listeria_monocytogenes_1639_v60 | 0.9437 |
| Listeria_monocytogenes_serotype_1_2a_str_02-5993_1196180 | Listeria_monocytogenes_1639_v60 | 0.9433 |
| Listeria_monocytogenes_R479a_1437838                     | Listeria_monocytogenes_1639_v60 | 0.9437 |
| Listeria_monocytogenes_N53-1_1234142                     | Listeria_monocytogenes_1639_v60 | 0.9036 |
| Listeria_monocytogenes_M7_1030009                        | Listeria_monocytogenes_1639_v60 | 0.9035 |
| Listeria_monocytogenes_LO28_393132                       | Listeria_monocytogenes_1639_v60 | 0.9423 |
| Listeria_monocytogenes_L99_563174                        | Listeria_monocytogenes_1639_v60 | 0.9041 |
| Listeria_monocytogenes_L312_882094                       | Listeria_monocytogenes_1639_v60 | 0.938  |
| Listeria_monocytogenes_J1816_930781                      | Listeria_monocytogenes_1639_v60 | 0.9282 |
| Listeria_monocytogenes_J1-220_930782                     | Listeria_monocytogenes_1639_v60 | 0.9207 |
| Listeria_monocytogenes_J0161_393130                      | Listeria_monocytogenes_1639_v60 | 0.9821 |
| Listeria_monocytogenes_HCC23_552536                      | Listeria_monocytogenes_1639_v60 | 0.9038 |
| Listeria_monocytogenes_FSL_R2-561_393126                 | Listeria_monocytogenes_1639_v60 | 0.9456 |
| Listeria_monocytogenes_FSL_J1-208_393119                 | Listeria_monocytogenes_1639_v60 | 0.8985 |
| Listeria_monocytogenes_FSL_J1-175_393118                 | Listeria_monocytogenes_1639_v60 | 0.9359 |
| Listeria_monocytogenes_Finland_1998_393127               | Listeria_monocytogenes_1639_v60 | 0.9595 |
| Listeria_monocytogenes_EGD-e_169963_v1                   | Listeria_monocytogenes_1639_v60 | 0.9511 |
| Listeria_monocytogenes_EGD-e_169963                      | Listeria_monocytogenes_1639_v60 | 0.9511 |
| Listeria_monocytogenes_EGD_1334565                       | Listeria_monocytogenes_1639_v60 | 0.9487 |
| Listeria_monocytogenes_CFSAN002349_1299895               | Listeria_monocytogenes_1639_v60 | 0.9337 |
| Listeria_monocytogenes_ATCC_19117_882095_v1              | Listeria_monocytogenes_1639_v60 | 0.9304 |
| Listeria_monocytogenes_ATCC_19117_882095                 | Listeria_monocytogenes_1639_v60 | 0.9303 |
| Listeria_monocytogenes_6179_1288295                      | Listeria_monocytogenes_1639_v60 | 0.9519 |
| Listeria_monocytogenes_1639_v9                           | Listeria_monocytogenes_1639_v60 | 0.9238 |
| Listeria_monocytogenes_1639_v99                          | Listeria_monocytogenes_1639_v60 | 0.9297 |
| Listeria_monocytogenes_1639_v98                          | Listeria_monocytogenes_1639_v60 | 0.9541 |
| Listeria_monocytogenes_1639_v97                          | Listeria_monocytogenes_1639_v60 | 0.9359 |
| Listeria_monocytogenes_1639_v96                          | Listeria_monocytogenes_1639_v60 | 0.929  |
| Listeria_monocytogenes_1639_v95                          | Listeria_monocytogenes_1639_v60 | 0.929  |
| Listeria_monocytogenes_1639_v94                          | Listeria_monocytogenes_1639_v60 | 0.9294 |
| Listeria_monocytogenes_1639_v93                          | Listeria_monocytogenes_1639_v60 | 0.9374 |
| Listeria_monocytogenes_1639_v92                          | Listeria_monocytogenes_1639_v60 | 0.9308 |
| Listeria_monocytogenes_1639_v91                          | Listeria_monocytogenes_1639_v60 | 0.9225 |
| Listeria_monocytogenes_1639_v90                          | Listeria_monocytogenes_1639_v60 | 0.9541 |
| Listeria_monocytogenes_1639_v8                           | Listeria_monocytogenes_1639_v60 | 0.9337 |
| Listeria_monocytogenes_1639_v89                          | Listeria_monocytogenes_1639_v60 | 0.9326 |
| Listeria_monocytogenes_1639_v88                          | Listeria_monocytogenes_1639_v60 | 0.9503 |
| Listeria_monocytogenes_1639_v87                          | Listeria_monocytogenes_1639_v60 | 0.9445 |
| Listeria_monocytogenes_1639_v86                          | Listeria_monocytogenes_1639_v60 | 0.9442 |
| Listeria_monocytogenes_1639_v85                          | Listeria_monocytogenes_1639_v60 | 0.9239 |
| Listeria_monocytogenes_1639_v84                          | Listeria_monocytogenes_1639_v60 | 0.9524 |
| Listeria_monocytogenes_1639_v83                          | Listeria_monocytogenes_1639_v60 | 0.9267 |
| Listeria_monocytogenes_1639_v82                          | Listeria_monocytogenes_1639_v60 | 0.926  |
| Listeria_monocytogenes_1639_v81                          | Listeria_monocytogenes_1639_v60 | 0.9581 |
| Listeria_monocytogenes_1639_v80                          | Listeria_monocytogenes_1639_v60 | 0.9318 |
| Listeria_monocytogenes_1639_v7                           | Listeria_monocytogenes_1639_v60 | 0.9337 |
| Listeria_monocytogenes_1639_v79                          | Listeria_monocytogenes_1639_v60 | 0.9567 |
| Listeria_monocytogenes_1639_v78                          | Listeria_monocytogenes_1639_v60 | 0.9574 |
| Listeria_monocytogenes_1639_v77                          | Listeria_monocytogenes_1639_v60 | 0.9546 |
| Listeria_monocytogenes_1639_v76                          | Listeria_monocytogenes_1639_v60 | 0.9451 |
| Listeria_monocytogenes_1639_v75                          | Listeria_monocytogenes_1639_v60 | 0.9041 |
| Listeria_monocytogenes_1639_v74                          | Listeria_monocytogenes_1639_v60 | 0.9375 |
| Listeria_monocytogenes_1639_v73                          | Listeria_monocytogenes_1639_v60 | 0.9359 |
| Listeria_monocytogenes_1639_v72                          | Listeria_monocytogenes_1639_v60 | 0.9266 |
| Listeria_monocytogenes_1639_v71                          | Listeria_monocytogenes_1639_v60 | 0.9424 |
| Listeria_monocytogenes_1639_v70                          | Listeria_monocytogenes_1639_v60 | 0.9454 |

|                                                          |                                 |        |
|----------------------------------------------------------|---------------------------------|--------|
| Listeria_monocytogenes_1639_v6                           | Listeria_monocytogenes_1639_v60 | 0.9331 |
| Listeria_monocytogenes_1639_v69                          | Listeria_monocytogenes_1639_v60 | 0.9264 |
| Listeria_monocytogenes_1639_v68                          | Listeria_monocytogenes_1639_v60 | 0.9682 |
| Listeria_monocytogenes_1639_v67                          | Listeria_monocytogenes_1639_v60 | 0.9405 |
| Listeria_monocytogenes_1639_v66                          | Listeria_monocytogenes_1639_v60 | 0.9485 |
| Listeria_monocytogenes_1639_v65                          | Listeria_monocytogenes_1639_v60 | 0.9417 |
| Listeria_monocytogenes_1639_v64                          | Listeria_monocytogenes_1639_v60 | 0.9485 |
| Listeria_monocytogenes_1639_v63                          | Listeria_monocytogenes_1639_v60 | 0.9323 |
| Listeria_monocytogenes_1639_v62                          | Listeria_monocytogenes_1639_v60 | 0.955  |
| Listeria_monocytogenes_1639_v61                          | Listeria_monocytogenes_1639_v60 | 0.9465 |
| Listeria_monocytogenes_1639_v60                          | Listeria_monocytogenes_1639_v60 | 0.0845 |
| Listeria_welshimeri_1643                                 | Listeria_monocytogenes_1639_v61 | 0.8677 |
| Listeria_welshimeri_serovar_6b_str_SLCC5334_386043       | Listeria_monocytogenes_1639_v61 | 0.8671 |
| Listeria_seeligeri_serovar_1_2b_str_SLCC3954_683837      | Listeria_monocytogenes_1639_v61 | 0.8751 |
| Listeria_seeligeri_FSL_S4-171_702452                     | Listeria_monocytogenes_1639_v61 | 0.8133 |
| Listeria_seeligeri_FSL_N1-067_702453                     | Listeria_monocytogenes_1639_v61 | 0.8338 |
| Listeria_seeligeri_1640_v1                               | Listeria_monocytogenes_1639_v61 | 0.8698 |
| Listeria_seeligeri_1640                                  | Listeria_monocytogenes_1639_v61 | 0.8697 |
| Listeria_monocytogenes_WSLC1042_1457188                  | Listeria_monocytogenes_1639_v61 | 0.9191 |
| Listeria_monocytogenes_WSLC1001_1457187                  | Listeria_monocytogenes_1639_v61 | 0.9526 |
| Listeria_monocytogenes_SLCC7179_879090                   | Listeria_monocytogenes_1639_v61 | 0.9518 |
| Listeria_monocytogenes_SLCC5850_882096                   | Listeria_monocytogenes_1639_v61 | 0.9546 |
| Listeria_monocytogenes_SLCC2755_932919                   | Listeria_monocytogenes_1639_v61 | 0.9204 |
| Listeria_monocytogenes_SLCC2540_879089                   | Listeria_monocytogenes_1639_v61 | 0.9362 |
| Listeria_monocytogenes_SLCC2479_882020                   | Listeria_monocytogenes_1639_v61 | 0.9522 |
| Listeria_monocytogenes_SLCC2378_879088                   | Listeria_monocytogenes_1639_v61 | 0.9205 |
| Listeria_monocytogenes_SLCC2376_882097                   | Listeria_monocytogenes_1639_v61 | 0.9244 |
| Listeria_monocytogenes_SLCC2372_932920                   | Listeria_monocytogenes_1639_v61 | 0.9445 |
| Listeria_monocytogenes_serotype_4b_str_LL195_1230340     | Listeria_monocytogenes_1639_v61 | 0.9256 |
| Listeria_monocytogenes_serotype_4b_str_LIS0087_1134669   | Listeria_monocytogenes_1639_v61 | 0.9357 |
| Listeria_monocytogenes_serotype_4b_str_F2365_265669      | Listeria_monocytogenes_1639_v61 | 0.9256 |
| Listeria_monocytogenes_serotype_4b_str_CLIP_80459_568819 | Listeria_monocytogenes_1639_v61 | 0.9324 |
| Listeria_monocytogenes_serotype_4b_str_81-0861_1196161   | Listeria_monocytogenes_1639_v61 | 0.9169 |
| Listeria_monocytogenes_serotype_4b_str_81-0592_1196160   | Listeria_monocytogenes_1639_v61 | 0.918  |
| Listeria_monocytogenes_serotype_4b_str_81-0558_1196159   | Listeria_monocytogenes_1639_v61 | 0.9186 |
| Listeria_monocytogenes_serotype_4b_str_10-0809_1196162   | Listeria_monocytogenes_1639_v61 | 0.918  |
| Listeria_monocytogenes_serotype_4b_str_02-6680_1196175   | Listeria_monocytogenes_1639_v61 | 0.9287 |
| Listeria_monocytogenes_serotype_4b_str_02-6679_1196174   | Listeria_monocytogenes_1639_v61 | 0.9287 |
| Listeria_monocytogenes_serotype_4b_str_02-1792_1196173   | Listeria_monocytogenes_1639_v61 | 0.919  |
| Listeria_monocytogenes_serotype_4b_str_02-1289_1196172   | Listeria_monocytogenes_1639_v61 | 0.919  |
| Listeria_monocytogenes_serotype_4b_str_02-1103_1196171   | Listeria_monocytogenes_1639_v61 | 0.919  |
| Listeria_monocytogenes_serotype_3c_str_10-5027_1196195   | Listeria_monocytogenes_1639_v61 | 0.954  |
| Listeria_monocytogenes_serotype_1_2c_str_10-5026_1196194 | Listeria_monocytogenes_1639_v61 | 0.9552 |
| Listeria_monocytogenes_serotype_1_2c_str_10-5025_1196193 | Listeria_monocytogenes_1639_v61 | 0.9552 |
| Listeria_monocytogenes_serotype_1_2b_str_10-0811_1196164 | Listeria_monocytogenes_1639_v61 | 0.9358 |
| Listeria_monocytogenes_serotype_1_2b_str_10-0810_1196163 | Listeria_monocytogenes_1639_v61 | 0.9358 |
| Listeria_monocytogenes_serotype_1_2a_str_99-6370_1196179 | Listeria_monocytogenes_1639_v61 | 0.9711 |
| Listeria_monocytogenes_serotype_1_2a_str_98-2035_1196178 | Listeria_monocytogenes_1639_v61 | 0.9711 |
| Listeria_monocytogenes_serotype_1_2a_str_95-0093_1196177 | Listeria_monocytogenes_1639_v61 | 0.9787 |
| Listeria_monocytogenes_serotype_1_2a_str_88-0478_1196176 | Listeria_monocytogenes_1639_v61 | 0.975  |
| Listeria_monocytogenes_serotype_1_2a_str_10-5024_1196192 | Listeria_monocytogenes_1639_v61 | 0.9772 |
| Listeria_monocytogenes_serotype_1_2a_str_10-4758_1196168 | Listeria_monocytogenes_1639_v61 | 0.9528 |
| Listeria_monocytogenes_serotype_1_2a_str_10-4754_1196167 | Listeria_monocytogenes_1639_v61 | 0.9528 |
| Listeria_monocytogenes_serotype_1_2a_str_10-1321_1196191 | Listeria_monocytogenes_1639_v61 | 0.9772 |
| Listeria_monocytogenes_serotype_1_2a_str_10-1047_1196190 | Listeria_monocytogenes_1639_v61 | 0.9768 |
| Listeria_monocytogenes_serotype_1_2a_str_10-1046_1196189 | Listeria_monocytogenes_1639_v61 | 0.9768 |
| Listeria_monocytogenes_serotype_1_2a_str_10-0934_1196170 | Listeria_monocytogenes_1639_v61 | 0.9526 |
| Listeria_monocytogenes_serotype_1_2a_str_10-0933_1196169 | Listeria_monocytogenes_1639_v61 | 0.9526 |
| Listeria_monocytogenes_serotype_1_2a_str_10-0815_1196188 | Listeria_monocytogenes_1639_v61 | 0.9722 |
| Listeria_monocytogenes_serotype_1_2a_str_10-0814_1196187 | Listeria_monocytogenes_1639_v61 | 0.9768 |
| Listeria_monocytogenes_serotype_1_2a_str_10-0813_1196166 | Listeria_monocytogenes_1639_v61 | 0.9546 |
| Listeria_monocytogenes_serotype_1_2a_str_10-0812_1196165 | Listeria_monocytogenes_1639_v61 | 0.9546 |
| Listeria_monocytogenes_serotype_1_2a_str_08-7669_1196186 | Listeria_monocytogenes_1639_v61 | 0.9721 |
| Listeria_monocytogenes_serotype_1_2a_str_08-7374_1196185 | Listeria_monocytogenes_1639_v61 | 0.9772 |
| Listeria_monocytogenes_serotype_1_2a_str_08-6997_1196184 | Listeria_monocytogenes_1639_v61 | 0.9722 |
| Listeria_monocytogenes_serotype_1_2a_str_08-6569_1196183 | Listeria_monocytogenes_1639_v61 | 0.9722 |
| Listeria_monocytogenes_serotype_1_2a_str_08-6056_1196182 | Listeria_monocytogenes_1639_v61 | 0.9722 |
| Listeria_monocytogenes_serotype_1_2a_str_04-5457_1196181 | Listeria_monocytogenes_1639_v61 | 0.9772 |
| Listeria_monocytogenes_serotype_1_2a_str_02-5993_1196180 | Listeria_monocytogenes_1639_v61 | 0.9768 |
| Listeria_monocytogenes_R479a_1437838                     | Listeria_monocytogenes_1639_v61 | 0.968  |
| Listeria_monocytogenes_N53-1_1234142                     | Listeria_monocytogenes_1639_v61 | 0.897  |
| Listeria_monocytogenes_M7_1030009                        | Listeria_monocytogenes_1639_v61 | 0.9048 |
| Listeria_monocytogenes_LO28_393132                       | Listeria_monocytogenes_1639_v61 | 0.9464 |
| Listeria_monocytogenes_L99_563174                        | Listeria_monocytogenes_1639_v61 | 0.9055 |
| Listeria_monocytogenes_L312_882094                       | Listeria_monocytogenes_1639_v61 | 0.9324 |
| Listeria_monocytogenes_J1816_930781                      | Listeria_monocytogenes_1639_v61 | 0.9234 |
| Listeria_monocytogenes_J1-220_930782                     | Listeria_monocytogenes_1639_v61 | 0.9215 |
| Listeria_monocytogenes_J0161_393130                      | Listeria_monocytogenes_1639_v61 | 0.946  |
| Listeria_monocytogenes_HCC23_552536                      | Listeria_monocytogenes_1639_v61 | 0.9055 |
| Listeria_monocytogenes_FSL_R2-561_393126                 | Listeria_monocytogenes_1639_v61 | 0.9523 |
| Listeria_monocytogenes_FSL_J1-208_393119                 | Listeria_monocytogenes_1639_v61 | 0.8898 |
| Listeria_monocytogenes_FSL_J1-175_393118                 | Listeria_monocytogenes_1639_v61 | 0.9352 |
| Listeria_monocytogenes_Finland_1998_393127               | Listeria_monocytogenes_1639_v61 | 0.953  |
| Listeria_monocytogenes_EGD-e_169963_v1                   | Listeria_monocytogenes_1639_v61 | 0.9454 |
| Listeria_monocytogenes_EGD-e_169963                      | Listeria_monocytogenes_1639_v61 | 0.9454 |
| Listeria_monocytogenes_EGD_1334565                       | Listeria_monocytogenes_1639_v61 | 0.9554 |
| Listeria_monocytogenes_CFSAN002349_1299895               | Listeria_monocytogenes_1639_v61 | 0.9292 |
| Listeria_monocytogenes_ATCC_19117_882095_v1              | Listeria_monocytogenes_1639_v61 | 0.924  |
| Listeria_monocytogenes_ATCC_19117_882095                 | Listeria_monocytogenes_1639_v61 | 0.924  |
| Listeria_monocytogenes_6179_1288295                      | Listeria_monocytogenes_1639_v61 | 0.9434 |
| Listeria_monocytogenes_1639_v9                           | Listeria_monocytogenes_1639_v61 | 0.9243 |

|                                                          |                                 |        |
|----------------------------------------------------------|---------------------------------|--------|
| Listeria_monocytogenes_1639_v99                          | Listeria_monocytogenes_1639_v61 | 0.9242 |
| Listeria_monocytogenes_1639_v98                          | Listeria_monocytogenes_1639_v61 | 0.9448 |
| Listeria_monocytogenes_1639_v97                          | Listeria_monocytogenes_1639_v61 | 0.9277 |
| Listeria_monocytogenes_1639_v96                          | Listeria_monocytogenes_1639_v61 | 0.9228 |
| Listeria_monocytogenes_1639_v95                          | Listeria_monocytogenes_1639_v61 | 0.9228 |
| Listeria_monocytogenes_1639_v94                          | Listeria_monocytogenes_1639_v61 | 0.9232 |
| Listeria_monocytogenes_1639_v93                          | Listeria_monocytogenes_1639_v61 | 0.9378 |
| Listeria_monocytogenes_1639_v92                          | Listeria_monocytogenes_1639_v61 | 0.9242 |
| Listeria_monocytogenes_1639_v91                          | Listeria_monocytogenes_1639_v61 | 0.9252 |
| Listeria_monocytogenes_1639_v90                          | Listeria_monocytogenes_1639_v61 | 0.9448 |
| Listeria_monocytogenes_1639_v8                           | Listeria_monocytogenes_1639_v61 | 0.9585 |
| Listeria_monocytogenes_1639_v89                          | Listeria_monocytogenes_1639_v61 | 0.9308 |
| Listeria_monocytogenes_1639_v88                          | Listeria_monocytogenes_1639_v61 | 0.9584 |
| Listeria_monocytogenes_1639_v87                          | Listeria_monocytogenes_1639_v61 | 0.9515 |
| Listeria_monocytogenes_1639_v86                          | Listeria_monocytogenes_1639_v61 | 0.9508 |
| Listeria_monocytogenes_1639_v85                          | Listeria_monocytogenes_1639_v61 | 0.9177 |
| Listeria_monocytogenes_1639_v84                          | Listeria_monocytogenes_1639_v61 | 0.9587 |
| Listeria_monocytogenes_1639_v83                          | Listeria_monocytogenes_1639_v61 | 0.9197 |
| Listeria_monocytogenes_1639_v82                          | Listeria_monocytogenes_1639_v61 | 0.9194 |
| Listeria_monocytogenes_1639_v81                          | Listeria_monocytogenes_1639_v61 | 0.9628 |
| Listeria_monocytogenes_1639_v80                          | Listeria_monocytogenes_1639_v61 | 0.9389 |
| Listeria_monocytogenes_1639_v7                           | Listeria_monocytogenes_1639_v61 | 0.9585 |
| Listeria_monocytogenes_1639_v79                          | Listeria_monocytogenes_1639_v61 | 0.9585 |
| Listeria_monocytogenes_1639_v78                          | Listeria_monocytogenes_1639_v61 | 0.9636 |
| Listeria_monocytogenes_1639_v77                          | Listeria_monocytogenes_1639_v61 | 0.9489 |
| Listeria_monocytogenes_1639_v76                          | Listeria_monocytogenes_1639_v61 | 0.9473 |
| Listeria_monocytogenes_1639_v75                          | Listeria_monocytogenes_1639_v61 | 0.9055 |
| Listeria_monocytogenes_1639_v74                          | Listeria_monocytogenes_1639_v61 | 0.9353 |
| Listeria_monocytogenes_1639_v73                          | Listeria_monocytogenes_1639_v61 | 0.943  |
| Listeria_monocytogenes_1639_v72                          | Listeria_monocytogenes_1639_v61 | 0.92   |
| Listeria_monocytogenes_1639_v71                          | Listeria_monocytogenes_1639_v61 | 0.9372 |
| Listeria_monocytogenes_1639_v70                          | Listeria_monocytogenes_1639_v61 | 0.9524 |
| Listeria_monocytogenes_1639_v6                           | Listeria_monocytogenes_1639_v61 | 0.9578 |
| Listeria_monocytogenes_1639_v69                          | Listeria_monocytogenes_1639_v61 | 0.9183 |
| Listeria_monocytogenes_1639_v68                          | Listeria_monocytogenes_1639_v61 | 0.9383 |
| Listeria_monocytogenes_1639_v67                          | Listeria_monocytogenes_1639_v61 | 0.9376 |
| Listeria_monocytogenes_1639_v66                          | Listeria_monocytogenes_1639_v61 | 0.9518 |
| Listeria_monocytogenes_1639_v65                          | Listeria_monocytogenes_1639_v61 | 0.9701 |
| Listeria_monocytogenes_1639_v64                          | Listeria_monocytogenes_1639_v61 | 0.9455 |
| Listeria_monocytogenes_1639_v63                          | Listeria_monocytogenes_1639_v61 | 0.9405 |
| Listeria_monocytogenes_1639_v62                          | Listeria_monocytogenes_1639_v61 | 0.9586 |
| Listeria_monocytogenes_1639_v61                          | Listeria_monocytogenes_1639_v61 | 0.0672 |
| Listeria_welshimeri_1643                                 | Listeria_monocytogenes_1639_v62 | 0.8671 |
| Listeria_welshimeri_serovar_6b_str_SLCC5334_386043       | Listeria_monocytogenes_1639_v62 | 0.8665 |
| Listeria_seeligeri_serovar_1_2b_str_SLCC3954_683837      | Listeria_monocytogenes_1639_v62 | 0.878  |
| Listeria_seeligeri_FSL_S4-171_702452                     | Listeria_monocytogenes_1639_v62 | 0.8165 |
| Listeria_seeligeri_FSL_N1-067_702453                     | Listeria_monocytogenes_1639_v62 | 0.8362 |
| Listeria_seeligeri_1640_v1                               | Listeria_monocytogenes_1639_v62 | 0.8712 |
| Listeria_seeligeri_1640                                  | Listeria_monocytogenes_1639_v62 | 0.8736 |
| Listeria_monocytogenes_WSLC1042_1457188                  | Listeria_monocytogenes_1639_v62 | 0.9175 |
| Listeria_monocytogenes_WSLC1001_1457187                  | Listeria_monocytogenes_1639_v62 | 0.9496 |
| Listeria_monocytogenes_SLCC7179_879090                   | Listeria_monocytogenes_1639_v62 | 0.9498 |
| Listeria_monocytogenes_SLCC5850_882096                   | Listeria_monocytogenes_1639_v62 | 0.9505 |
| Listeria_monocytogenes_SLCC2755_932919                   | Listeria_monocytogenes_1639_v62 | 0.9229 |
| Listeria_monocytogenes_SLCC2540_879089                   | Listeria_monocytogenes_1639_v62 | 0.9364 |
| Listeria_monocytogenes_SLCC2479_882020                   | Listeria_monocytogenes_1639_v62 | 0.9518 |
| Listeria_monocytogenes_SLCC2378_879088                   | Listeria_monocytogenes_1639_v62 | 0.9189 |
| Listeria_monocytogenes_SLCC2376_882097                   | Listeria_monocytogenes_1639_v62 | 0.9255 |
| Listeria_monocytogenes_SLCC2372_932920                   | Listeria_monocytogenes_1639_v62 | 0.9448 |
| Listeria_monocytogenes_serotype_4b_str_LL195_1230340     | Listeria_monocytogenes_1639_v62 | 0.9244 |
| Listeria_monocytogenes_serotype_4b_str_LIS0087_1134669   | Listeria_monocytogenes_1639_v62 | 0.9307 |
| Listeria_monocytogenes_serotype_4b_str_F2365_265669      | Listeria_monocytogenes_1639_v62 | 0.9244 |
| Listeria_monocytogenes_serotype_4b_str_CLIP_80459_568819 | Listeria_monocytogenes_1639_v62 | 0.9304 |
| Listeria_monocytogenes_serotype_4b_str_81-0861_1196161   | Listeria_monocytogenes_1639_v62 | 0.9164 |
| Listeria_monocytogenes_serotype_4b_str_81-0592_1196160   | Listeria_monocytogenes_1639_v62 | 0.9175 |
| Listeria_monocytogenes_serotype_4b_str_81-0558_1196159   | Listeria_monocytogenes_1639_v62 | 0.9182 |
| Listeria_monocytogenes_serotype_4b_str_10-0809_1196162   | Listeria_monocytogenes_1639_v62 | 0.9175 |
| Listeria_monocytogenes_serotype_4b_str_02-6680_1196175   | Listeria_monocytogenes_1639_v62 | 0.9298 |
| Listeria_monocytogenes_serotype_4b_str_02-6679_1196174   | Listeria_monocytogenes_1639_v62 | 0.9298 |
| Listeria_monocytogenes_serotype_4b_str_02-1792_1196173   | Listeria_monocytogenes_1639_v62 | 0.9174 |
| Listeria_monocytogenes_serotype_4b_str_02-1289_1196172   | Listeria_monocytogenes_1639_v62 | 0.9174 |
| Listeria_monocytogenes_serotype_4b_str_02-1103_1196171   | Listeria_monocytogenes_1639_v62 | 0.9174 |
| Listeria_monocytogenes_serotype_3c_str_10-5027_1196195   | Listeria_monocytogenes_1639_v62 | 0.9543 |
| Listeria_monocytogenes_serotype_1_2c_str_10-5026_1196194 | Listeria_monocytogenes_1639_v62 | 0.9547 |
| Listeria_monocytogenes_serotype_1_2c_str_10-5025_1196193 | Listeria_monocytogenes_1639_v62 | 0.9547 |
| Listeria_monocytogenes_serotype_1_2b_str_10-0811_1196164 | Listeria_monocytogenes_1639_v62 | 0.9449 |
| Listeria_monocytogenes_serotype_1_2b_str_10-0810_1196163 | Listeria_monocytogenes_1639_v62 | 0.9449 |
| Listeria_monocytogenes_serotype_1_2a_str_99-6370_1196179 | Listeria_monocytogenes_1639_v62 | 0.9615 |
| Listeria_monocytogenes_serotype_1_2a_str_98-2035_1196178 | Listeria_monocytogenes_1639_v62 | 0.9615 |
| Listeria_monocytogenes_serotype_1_2a_str_95-0093_1196177 | Listeria_monocytogenes_1639_v62 | 0.9558 |
| Listeria_monocytogenes_serotype_1_2a_str_88-0478_1196176 | Listeria_monocytogenes_1639_v62 | 0.9554 |
| Listeria_monocytogenes_serotype_1_2a_str_10-5024_1196192 | Listeria_monocytogenes_1639_v62 | 0.9561 |
| Listeria_monocytogenes_serotype_1_2a_str_10-4758_1196168 | Listeria_monocytogenes_1639_v62 | 0.9531 |
| Listeria_monocytogenes_serotype_1_2a_str_10-4754_1196167 | Listeria_monocytogenes_1639_v62 | 0.9531 |
| Listeria_monocytogenes_serotype_1_2a_str_10-1321_1196191 | Listeria_monocytogenes_1639_v62 | 0.9561 |
| Listeria_monocytogenes_serotype_1_2a_str_10-1047_1196190 | Listeria_monocytogenes_1639_v62 | 0.9554 |
| Listeria_monocytogenes_serotype_1_2a_str_10-1046_1196189 | Listeria_monocytogenes_1639_v62 | 0.9554 |
| Listeria_monocytogenes_serotype_1_2a_str_10-0934_1196170 | Listeria_monocytogenes_1639_v62 | 0.948  |
| Listeria_monocytogenes_serotype_1_2a_str_10-0933_1196169 | Listeria_monocytogenes_1639_v62 | 0.948  |
| Listeria_monocytogenes_serotype_1_2a_str_10-0815_1196188 | Listeria_monocytogenes_1639_v62 | 0.9596 |
| Listeria_monocytogenes_serotype_1_2a_str_10-0814_1196187 | Listeria_monocytogenes_1639_v62 | 0.9558 |



|                                                          |                                 |        |
|----------------------------------------------------------|---------------------------------|--------|
| Listeria_monocytogenes_serotype_1_2a_str_10-0813_1196166 | Listeria_monocytogenes_1639_v62 | 0.952  |
| Listeria_monocytogenes_serotype_1_2a_str_10-0812_1196165 | Listeria_monocytogenes_1639_v62 | 0.952  |
| Listeria_monocytogenes_serotype_1_2a_str_08-7669_1196186 | Listeria_monocytogenes_1639_v62 | 0.9512 |
| Listeria_monocytogenes_serotype_1_2a_str_08-7374_1196185 | Listeria_monocytogenes_1639_v62 | 0.9561 |
| Listeria_monocytogenes_serotype_1_2a_str_08-6997_1196184 | Listeria_monocytogenes_1639_v62 | 0.9596 |
| Listeria_monocytogenes_serotype_1_2a_str_08-6569_1196183 | Listeria_monocytogenes_1639_v62 | 0.9596 |
| Listeria_monocytogenes_serotype_1_2a_str_08-6056_1196182 | Listeria_monocytogenes_1639_v62 | 0.9596 |
| Listeria_monocytogenes_serotype_1_2a_str_04-5457_1196181 | Listeria_monocytogenes_1639_v62 | 0.9561 |
| Listeria_monocytogenes_serotype_1_2a_str_02-5993_1196180 | Listeria_monocytogenes_1639_v62 | 0.9558 |
| Listeria_monocytogenes_R479a_1437838                     | Listeria_monocytogenes_1639_v62 | 0.9532 |
| Listeria_monocytogenes_N53-1_1234142                     | Listeria_monocytogenes_1639_v62 | 0.8972 |
| Listeria_monocytogenes_M7_1030009                        | Listeria_monocytogenes_1639_v62 | 0.9091 |
| Listeria_monocytogenes_LO28_393132                       | Listeria_monocytogenes_1639_v62 | 0.9459 |
| Listeria_monocytogenes_L99_563174                        | Listeria_monocytogenes_1639_v62 | 0.9098 |
| Listeria_monocytogenes_L312_882094                       | Listeria_monocytogenes_1639_v62 | 0.9304 |
| Listeria_monocytogenes_J1816_930781                      | Listeria_monocytogenes_1639_v62 | 0.9248 |
| Listeria_monocytogenes_J1-220_930782                     | Listeria_monocytogenes_1639_v62 | 0.9218 |
| Listeria_monocytogenes_J0161_393130                      | Listeria_monocytogenes_1639_v62 | 0.9522 |
| Listeria_monocytogenes_HCC23_552536                      | Listeria_monocytogenes_1639_v62 | 0.9091 |
| Listeria_monocytogenes_FSL_R2-561_393126                 | Listeria_monocytogenes_1639_v62 | 0.9537 |
| Listeria_monocytogenes_FSL_J1-208_393119                 | Listeria_monocytogenes_1639_v62 | 0.8911 |
| Listeria_monocytogenes_FSL_J1-175_393118                 | Listeria_monocytogenes_1639_v62 | 0.937  |
| Listeria_monocytogenes_Finland_1998_393127               | Listeria_monocytogenes_1639_v62 | 0.9719 |
| Listeria_monocytogenes_EGD-e_169963_v1                   | Listeria_monocytogenes_1639_v62 | 0.9431 |
| Listeria_monocytogenes_EGD-e_169963                      | Listeria_monocytogenes_1639_v62 | 0.9431 |
| Listeria_monocytogenes_EGD_1334565                       | Listeria_monocytogenes_1639_v62 | 0.9512 |
| Listeria_monocytogenes_CFSAN002349_1299895               | Listeria_monocytogenes_1639_v62 | 0.9298 |
| Listeria_monocytogenes_ATCC_19117_882095_v1              | Listeria_monocytogenes_1639_v62 | 0.9239 |
| Listeria_monocytogenes_ATCC_19117_882095                 | Listeria_monocytogenes_1639_v62 | 0.9239 |
| Listeria_monocytogenes_6179_1288295                      | Listeria_monocytogenes_1639_v62 | 0.9477 |
| Listeria_monocytogenes_1639_v9                           | Listeria_monocytogenes_1639_v62 | 0.9264 |
| Listeria_monocytogenes_1639_v99                          | Listeria_monocytogenes_1639_v62 | 0.9245 |
| Listeria_monocytogenes_1639_v98                          | Listeria_monocytogenes_1639_v62 | 0.9518 |
| Listeria_monocytogenes_1639_v97                          | Listeria_monocytogenes_1639_v62 | 0.9291 |
| Listeria_monocytogenes_1639_v96                          | Listeria_monocytogenes_1639_v62 | 0.9253 |
| Listeria_monocytogenes_1639_v95                          | Listeria_monocytogenes_1639_v62 | 0.9253 |
| Listeria_monocytogenes_1639_v94                          | Listeria_monocytogenes_1639_v62 | 0.9256 |
| Listeria_monocytogenes_1639_v93                          | Listeria_monocytogenes_1639_v62 | 0.941  |
| Listeria_monocytogenes_1639_v92                          | Listeria_monocytogenes_1639_v62 | 0.9256 |
| Listeria_monocytogenes_1639_v91                          | Listeria_monocytogenes_1639_v62 | 0.9229 |
| Listeria_monocytogenes_1639_v90                          | Listeria_monocytogenes_1639_v62 | 0.9518 |
| Listeria_monocytogenes_1639_v8                           | Listeria_monocytogenes_1639_v62 | 0.9432 |
| Listeria_monocytogenes_1639_v89                          | Listeria_monocytogenes_1639_v62 | 0.9303 |
| Listeria_monocytogenes_1639_v88                          | Listeria_monocytogenes_1639_v62 | 0.955  |
| Listeria_monocytogenes_1639_v87                          | Listeria_monocytogenes_1639_v62 | 0.9477 |
| Listeria_monocytogenes_1639_v86                          | Listeria_monocytogenes_1639_v62 | 0.9474 |
| Listeria_monocytogenes_1639_v85                          | Listeria_monocytogenes_1639_v62 | 0.9165 |
| Listeria_monocytogenes_1639_v84                          | Listeria_monocytogenes_1639_v62 | 0.9556 |
| Listeria_monocytogenes_1639_v83                          | Listeria_monocytogenes_1639_v62 | 0.9196 |
| Listeria_monocytogenes_1639_v82                          | Listeria_monocytogenes_1639_v62 | 0.9193 |
| Listeria_monocytogenes_1639_v81                          | Listeria_monocytogenes_1639_v62 | 0.984  |
| Listeria_monocytogenes_1639_v80                          | Listeria_monocytogenes_1639_v62 | 0.9362 |
| Listeria_monocytogenes_1639_v7                           | Listeria_monocytogenes_1639_v62 | 0.9432 |
| Listeria_monocytogenes_1639_v79                          | Listeria_monocytogenes_1639_v62 | 0.9788 |
| Listeria_monocytogenes_1639_v78                          | Listeria_monocytogenes_1639_v62 | 0.9836 |
| Listeria_monocytogenes_1639_v77                          | Listeria_monocytogenes_1639_v62 | 0.947  |
| Listeria_monocytogenes_1639_v76                          | Listeria_monocytogenes_1639_v62 | 0.9587 |
| Listeria_monocytogenes_1639_v75                          | Listeria_monocytogenes_1639_v62 | 0.9098 |
| Listeria_monocytogenes_1639_v74                          | Listeria_monocytogenes_1639_v62 | 0.9318 |
| Listeria_monocytogenes_1639_v73                          | Listeria_monocytogenes_1639_v62 | 0.9429 |
| Listeria_monocytogenes_1639_v72                          | Listeria_monocytogenes_1639_v62 | 0.9191 |
| Listeria_monocytogenes_1639_v71                          | Listeria_monocytogenes_1639_v62 | 0.9441 |
| Listeria_monocytogenes_1639_v70                          | Listeria_monocytogenes_1639_v62 | 0.9523 |
| Listeria_monocytogenes_1639_v6                           | Listeria_monocytogenes_1639_v62 | 0.9425 |
| Listeria_monocytogenes_1639_v69                          | Listeria_monocytogenes_1639_v62 | 0.9178 |
| Listeria_monocytogenes_1639_v68                          | Listeria_monocytogenes_1639_v62 | 0.9438 |
| Listeria_monocytogenes_1639_v67                          | Listeria_monocytogenes_1639_v62 | 0.9408 |
| Listeria_monocytogenes_1639_v66                          | Listeria_monocytogenes_1639_v62 | 0.9525 |
| Listeria_monocytogenes_1639_v65                          | Listeria_monocytogenes_1639_v62 | 0.9649 |
| Listeria_monocytogenes_1639_v64                          | Listeria_monocytogenes_1639_v62 | 0.9562 |
| Listeria_monocytogenes_1639_v63                          | Listeria_monocytogenes_1639_v62 | 0.9375 |
| Listeria_monocytogenes_1639_v62                          | Listeria_monocytogenes_1639_v62 | 0.07   |
| Listeria_welshimeri_1643                                 | Listeria_monocytogenes_1639_v63 | 0.8677 |
| Listeria_welshimeri_serovar_6b_str_SLCC5334_386043       | Listeria_monocytogenes_1639_v63 | 0.8674 |
| Listeria_seeligeri_serovar_1_2b_str_SLCC3954_683837      | Listeria_monocytogenes_1639_v63 | 0.875  |
| Listeria_seeligeri_FSL_S4-171_702452                     | Listeria_monocytogenes_1639_v63 | 0.8206 |
| Listeria_seeligeri_FSL_N1-067_702453                     | Listeria_monocytogenes_1639_v63 | 0.8382 |
| Listeria_seeligeri_1640_v1                               | Listeria_monocytogenes_1639_v63 | 0.8785 |
| Listeria_seeligeri_1640                                  | Listeria_monocytogenes_1639_v63 | 0.8708 |
| Listeria_monocytogenes_WSLC1042_1457188                  | Listeria_monocytogenes_1639_v63 | 0.9386 |
| Listeria_monocytogenes_WSLC1001_1457187                  | Listeria_monocytogenes_1639_v63 | 0.9377 |
| Listeria_monocytogenes_SLCC7179_879090                   | Listeria_monocytogenes_1639_v63 | 0.9315 |
| Listeria_monocytogenes_SLCC5850_882096                   | Listeria_monocytogenes_1639_v63 | 0.9397 |
| Listeria_monocytogenes_SLCC2755_932919                   | Listeria_monocytogenes_1639_v63 | 0.9413 |
| Listeria_monocytogenes_SLCC2540_879089                   | Listeria_monocytogenes_1639_v63 | 0.9571 |
| Listeria_monocytogenes_SLCC2479_882020                   | Listeria_monocytogenes_1639_v63 | 0.9422 |
| Listeria_monocytogenes_SLCC2378_879088                   | Listeria_monocytogenes_1639_v63 | 0.9396 |
| Listeria_monocytogenes_SLCC2376_882097                   | Listeria_monocytogenes_1639_v63 | 0.9275 |
| Listeria_monocytogenes_SLCC2372_932920                   | Listeria_monocytogenes_1639_v63 | 0.9441 |
| Listeria_monocytogenes_serotype_4b_str_LL195_1230340     | Listeria_monocytogenes_1639_v63 | 0.9449 |
| Listeria_monocytogenes_serotype_4b_str_LIS0087_1134669   | Listeria_monocytogenes_1639_v63 | 0.9194 |

|                                                          |                                 |        |
|----------------------------------------------------------|---------------------------------|--------|
| Listeria_monocytogenes_serotype_4b_str_F2365_265669      | Listeria_monocytogenes_1639_v63 | 0.9449 |
| Listeria_monocytogenes_serotype_4b_str_CLIP_80459_568819 | Listeria_monocytogenes_1639_v63 | 0.9467 |
| Listeria_monocytogenes_serotype_4b_str_81-0861_1196161   | Listeria_monocytogenes_1639_v63 | 0.9343 |
| Listeria_monocytogenes_serotype_4b_str_81-0592_1196160   | Listeria_monocytogenes_1639_v63 | 0.9354 |
| Listeria_monocytogenes_serotype_4b_str_81-0558_1196159   | Listeria_monocytogenes_1639_v63 | 0.9361 |
| Listeria_monocytogenes_serotype_4b_str_10-0809_1196162   | Listeria_monocytogenes_1639_v63 | 0.9358 |
| Listeria_monocytogenes_serotype_4b_str_02-6680_1196175   | Listeria_monocytogenes_1639_v63 | 0.9423 |
| Listeria_monocytogenes_serotype_4b_str_02-6679_1196174   | Listeria_monocytogenes_1639_v63 | 0.9423 |
| Listeria_monocytogenes_serotype_4b_str_02-1792_1196173   | Listeria_monocytogenes_1639_v63 | 0.9372 |
| Listeria_monocytogenes_serotype_4b_str_02-1289_1196172   | Listeria_monocytogenes_1639_v63 | 0.9372 |
| Listeria_monocytogenes_serotype_4b_str_02-1103_1196171   | Listeria_monocytogenes_1639_v63 | 0.9372 |
| Listeria_monocytogenes_serotype_3c_str_10-5027_1196195   | Listeria_monocytogenes_1639_v63 | 0.9466 |
| Listeria_monocytogenes_serotype_1_2c_str_10-5026_1196194 | Listeria_monocytogenes_1639_v63 | 0.9466 |
| Listeria_monocytogenes_serotype_1_2c_str_10-5025_1196193 | Listeria_monocytogenes_1639_v63 | 0.9466 |
| Listeria_monocytogenes_serotype_1_2b_str_10-0811_1196164 | Listeria_monocytogenes_1639_v63 | 0.9664 |
| Listeria_monocytogenes_serotype_1_2b_str_10-0810_1196163 | Listeria_monocytogenes_1639_v63 | 0.9664 |
| Listeria_monocytogenes_serotype_1_2a_str_99-6370_1196179 | Listeria_monocytogenes_1639_v63 | 0.9323 |
| Listeria_monocytogenes_serotype_1_2a_str_98-2035_1196178 | Listeria_monocytogenes_1639_v63 | 0.9323 |
| Listeria_monocytogenes_serotype_1_2a_str_95-0093_1196177 | Listeria_monocytogenes_1639_v63 | 0.9378 |
| Listeria_monocytogenes_serotype_1_2a_str_88-0478_1196176 | Listeria_monocytogenes_1639_v63 | 0.9359 |
| Listeria_monocytogenes_serotype_1_2a_str_10-5024_1196192 | Listeria_monocytogenes_1639_v63 | 0.937  |
| Listeria_monocytogenes_serotype_1_2a_str_10-4758_1196168 | Listeria_monocytogenes_1639_v63 | 0.9424 |
| Listeria_monocytogenes_serotype_1_2a_str_10-4754_1196167 | Listeria_monocytogenes_1639_v63 | 0.9427 |
| Listeria_monocytogenes_serotype_1_2a_str_10-1321_1196191 | Listeria_monocytogenes_1639_v63 | 0.937  |
| Listeria_monocytogenes_serotype_1_2a_str_10-1047_1196190 | Listeria_monocytogenes_1639_v63 | 0.9374 |
| Listeria_monocytogenes_serotype_1_2a_str_10-1046_1196189 | Listeria_monocytogenes_1639_v63 | 0.9374 |
| Listeria_monocytogenes_serotype_1_2a_str_10-0934_1196170 | Listeria_monocytogenes_1639_v63 | 0.9367 |
| Listeria_monocytogenes_serotype_1_2a_str_10-0933_1196169 | Listeria_monocytogenes_1639_v63 | 0.9367 |
| Listeria_monocytogenes_serotype_1_2a_str_10-0815_1196188 | Listeria_monocytogenes_1639_v63 | 0.9329 |
| Listeria_monocytogenes_serotype_1_2a_str_10-0814_1196187 | Listeria_monocytogenes_1639_v63 | 0.9374 |
| Listeria_monocytogenes_serotype_1_2a_str_10-0813_1196166 | Listeria_monocytogenes_1639_v63 | 0.9379 |
| Listeria_monocytogenes_serotype_1_2a_str_10-0812_1196165 | Listeria_monocytogenes_1639_v63 | 0.9379 |
| Listeria_monocytogenes_serotype_1_2a_str_08-7669_1196186 | Listeria_monocytogenes_1639_v63 | 0.9327 |
| Listeria_monocytogenes_serotype_1_2a_str_08-7374_1196185 | Listeria_monocytogenes_1639_v63 | 0.937  |
| Listeria_monocytogenes_serotype_1_2a_str_08-6997_1196184 | Listeria_monocytogenes_1639_v63 | 0.9329 |
| Listeria_monocytogenes_serotype_1_2a_str_08-6569_1196183 | Listeria_monocytogenes_1639_v63 | 0.9329 |
| Listeria_monocytogenes_serotype_1_2a_str_08-6056_1196182 | Listeria_monocytogenes_1639_v63 | 0.9329 |
| Listeria_monocytogenes_serotype_1_2a_str_04-5457_1196181 | Listeria_monocytogenes_1639_v63 | 0.937  |
| Listeria_monocytogenes_serotype_1_2a_str_02-5993_1196180 | Listeria_monocytogenes_1639_v63 | 0.937  |
| Listeria_monocytogenes_R479a_1437838                     | Listeria_monocytogenes_1639_v63 | 0.9426 |
| Listeria_monocytogenes_N53-1_1234142                     | Listeria_monocytogenes_1639_v63 | 0.8868 |
| Listeria_monocytogenes_M7_1030009                        | Listeria_monocytogenes_1639_v63 | 0.9081 |
| Listeria_monocytogenes_LO28_393132                       | Listeria_monocytogenes_1639_v63 | 0.9363 |
| Listeria_monocytogenes_L99_563174                        | Listeria_monocytogenes_1639_v63 | 0.9084 |
| Listeria_monocytogenes_L312_882094                       | Listeria_monocytogenes_1639_v63 | 0.9471 |
| Listeria_monocytogenes_J1816_930781                      | Listeria_monocytogenes_1639_v63 | 0.9375 |
| Listeria_monocytogenes_J1-220_930782                     | Listeria_monocytogenes_1639_v63 | 0.9366 |
| Listeria_monocytogenes_J0161_393130                      | Listeria_monocytogenes_1639_v63 | 0.9312 |
| Listeria_monocytogenes_HCC23_552536                      | Listeria_monocytogenes_1639_v63 | 0.9077 |
| Listeria_monocytogenes_FSL_R2-561_393126                 | Listeria_monocytogenes_1639_v63 | 0.943  |
| Listeria_monocytogenes_FSL_J1-208_393119                 | Listeria_monocytogenes_1639_v63 | 0.8968 |
| Listeria_monocytogenes_FSL_J1-175_393118                 | Listeria_monocytogenes_1639_v63 | 0.9584 |
| Listeria_monocytogenes_Finland_1998_393127               | Listeria_monocytogenes_1639_v63 | 0.937  |
| Listeria_monocytogenes_EGD-e_169963_v1                   | Listeria_monocytogenes_1639_v63 | 0.9353 |
| Listeria_monocytogenes_EGD-e_169963                      | Listeria_monocytogenes_1639_v63 | 0.9357 |
| Listeria_monocytogenes_EGD_1334565                       | Listeria_monocytogenes_1639_v63 | 0.9404 |
| Listeria_monocytogenes_CFSAN002349_1299895               | Listeria_monocytogenes_1639_v63 | 0.9472 |
| Listeria_monocytogenes_ATCC_19117_882095_v1              | Listeria_monocytogenes_1639_v63 | 0.9409 |
| Listeria_monocytogenes_ATCC_19117_882095                 | Listeria_monocytogenes_1639_v63 | 0.9406 |
| Listeria_monocytogenes_6179_1288295                      | Listeria_monocytogenes_1639_v63 | 0.9336 |
| Listeria_monocytogenes_1639_v9                           | Listeria_monocytogenes_1639_v63 | 0.9396 |
| Listeria_monocytogenes_1639_v99                          | Listeria_monocytogenes_1639_v63 | 0.9464 |
| Listeria_monocytogenes_1639_v98                          | Listeria_monocytogenes_1639_v63 | 0.9292 |
| Listeria_monocytogenes_1639_v97                          | Listeria_monocytogenes_1639_v63 | 0.9419 |
| Listeria_monocytogenes_1639_v96                          | Listeria_monocytogenes_1639_v63 | 0.9464 |
| Listeria_monocytogenes_1639_v95                          | Listeria_monocytogenes_1639_v63 | 0.9461 |
| Listeria_monocytogenes_1639_v94                          | Listeria_monocytogenes_1639_v63 | 0.9464 |
| Listeria_monocytogenes_1639_v93                          | Listeria_monocytogenes_1639_v63 | 0.937  |
| Listeria_monocytogenes_1639_v92                          | Listeria_monocytogenes_1639_v63 | 0.9468 |
| Listeria_monocytogenes_1639_v91                          | Listeria_monocytogenes_1639_v63 | 0.943  |
| Listeria_monocytogenes_1639_v90                          | Listeria_monocytogenes_1639_v63 | 0.9292 |
| Listeria_monocytogenes_1639_v8                           | Listeria_monocytogenes_1639_v63 | 0.9323 |
| Listeria_monocytogenes_1639_v89                          | Listeria_monocytogenes_1639_v63 | 0.9446 |
| Listeria_monocytogenes_1639_v88                          | Listeria_monocytogenes_1639_v63 | 0.9402 |
| Listeria_monocytogenes_1639_v87                          | Listeria_monocytogenes_1639_v63 | 0.9356 |
| Listeria_monocytogenes_1639_v86                          | Listeria_monocytogenes_1639_v63 | 0.9349 |
| Listeria_monocytogenes_1639_v85                          | Listeria_monocytogenes_1639_v63 | 0.9351 |
| Listeria_monocytogenes_1639_v84                          | Listeria_monocytogenes_1639_v63 | 0.9426 |
| Listeria_monocytogenes_1639_v83                          | Listeria_monocytogenes_1639_v63 | 0.9353 |
| Listeria_monocytogenes_1639_v82                          | Listeria_monocytogenes_1639_v63 | 0.935  |
| Listeria_monocytogenes_1639_v81                          | Listeria_monocytogenes_1639_v63 | 0.9428 |
| Listeria_monocytogenes_1639_v80                          | Listeria_monocytogenes_1639_v63 | 0.9683 |
| Listeria_monocytogenes_1639_v7                           | Listeria_monocytogenes_1639_v63 | 0.9323 |
| Listeria_monocytogenes_1639_v79                          | Listeria_monocytogenes_1639_v63 | 0.9395 |
| Listeria_monocytogenes_1639_v78                          | Listeria_monocytogenes_1639_v63 | 0.9432 |
| Listeria_monocytogenes_1639_v77                          | Listeria_monocytogenes_1639_v63 | 0.9303 |
| Listeria_monocytogenes_1639_v76                          | Listeria_monocytogenes_1639_v63 | 0.9366 |
| Listeria_monocytogenes_1639_v75                          | Listeria_monocytogenes_1639_v63 | 0.9084 |
| Listeria_monocytogenes_1639_v74                          | Listeria_monocytogenes_1639_v63 | 0.9226 |
| Listeria_monocytogenes_1639_v73                          | Listeria_monocytogenes_1639_v63 | 0.9411 |
| Listeria_monocytogenes_1639_v72                          | Listeria_monocytogenes_1639_v63 | 0.9352 |

|                                                          |                                 |        |
|----------------------------------------------------------|---------------------------------|--------|
| Listeria_monocytogenes_1639_v71                          | Listeria_monocytogenes_1639_v63 | 0.9287 |
| Listeria_monocytogenes_1639_v70                          | Listeria_monocytogenes_1639_v63 | 0.9454 |
| Listeria_monocytogenes_1639_v6                           | Listeria_monocytogenes_1639_v63 | 0.932  |
| Listeria_monocytogenes_1639_v69                          | Listeria_monocytogenes_1639_v63 | 0.9354 |
| Listeria_monocytogenes_1639_v68                          | Listeria_monocytogenes_1639_v63 | 0.9257 |
| Listeria_monocytogenes_1639_v67                          | Listeria_monocytogenes_1639_v63 | 0.9547 |
| Listeria_monocytogenes_1639_v66                          | Listeria_monocytogenes_1639_v63 | 0.9372 |
| Listeria_monocytogenes_1639_v65                          | Listeria_monocytogenes_1639_v63 | 0.935  |
| Listeria_monocytogenes_1639_v64                          | Listeria_monocytogenes_1639_v63 | 0.9314 |
| Listeria_monocytogenes_1639_v63                          | Listeria_monocytogenes_1639_v63 | 0.0735 |
| Listeria_welshimeri_1643                                 | Listeria_monocytogenes_1639_v64 | 0.8724 |
| Listeria_welshimeri_serovar_6b_str_SLCC5334_386043       | Listeria_monocytogenes_1639_v64 | 0.8718 |
| Listeria_seeligeri_serovar_1_2b_str_SLCC3954_683837      | Listeria_monocytogenes_1639_v64 | 0.873  |
| Listeria_seeligeri_FSL_S4-171_702452                     | Listeria_monocytogenes_1639_v64 | 0.8089 |
| Listeria_seeligeri_FSL_N1-067_702453                     | Listeria_monocytogenes_1639_v64 | 0.8277 |
| Listeria_seeligeri_1640_v1                               | Listeria_monocytogenes_1639_v64 | 0.8712 |
| Listeria_seeligeri_1640                                  | Listeria_monocytogenes_1639_v64 | 0.8668 |
| Listeria_monocytogenes_WSLC1042_1457188                  | Listeria_monocytogenes_1639_v64 | 0.9255 |
| Listeria_monocytogenes_WSLC1001_1457187                  | Listeria_monocytogenes_1639_v64 | 0.9591 |
| Listeria_monocytogenes_SLCC7179_879090                   | Listeria_monocytogenes_1639_v64 | 0.9489 |
| Listeria_monocytogenes_SLCC5850_882096                   | Listeria_monocytogenes_1639_v64 | 0.9586 |
| Listeria_monocytogenes_SLCC2755_932919                   | Listeria_monocytogenes_1639_v64 | 0.9223 |
| Listeria_monocytogenes_SLCC2540_879089                   | Listeria_monocytogenes_1639_v64 | 0.9441 |
| Listeria_monocytogenes_SLCC2479_882020                   | Listeria_monocytogenes_1639_v64 | 0.9494 |
| Listeria_monocytogenes_SLCC2378_879088                   | Listeria_monocytogenes_1639_v64 | 0.9269 |
| Listeria_monocytogenes_SLCC2376_882097                   | Listeria_monocytogenes_1639_v64 | 0.9306 |
| Listeria_monocytogenes_SLCC2372_932920                   | Listeria_monocytogenes_1639_v64 | 0.9431 |
| Listeria_monocytogenes_serotype_4b_str_LL195_1230340     | Listeria_monocytogenes_1639_v64 | 0.9306 |
| Listeria_monocytogenes_serotype_4b_str_LIS0087_1134669   | Listeria_monocytogenes_1639_v64 | 0.9328 |
| Listeria_monocytogenes_serotype_4b_str_F2365_265669      | Listeria_monocytogenes_1639_v64 | 0.9306 |
| Listeria_monocytogenes_serotype_4b_str_CLIP_80459_568819 | Listeria_monocytogenes_1639_v64 | 0.9343 |
| Listeria_monocytogenes_serotype_4b_str_81-0861_1196161   | Listeria_monocytogenes_1639_v64 | 0.9184 |
| Listeria_monocytogenes_serotype_4b_str_81-0592_1196160   | Listeria_monocytogenes_1639_v64 | 0.9195 |
| Listeria_monocytogenes_serotype_4b_str_81-0558_1196159   | Listeria_monocytogenes_1639_v64 | 0.9201 |
| Listeria_monocytogenes_serotype_4b_str_10-0809_1196162   | Listeria_monocytogenes_1639_v64 | 0.9195 |
| Listeria_monocytogenes_serotype_4b_str_02-6680_1196175   | Listeria_monocytogenes_1639_v64 | 0.9284 |
| Listeria_monocytogenes_serotype_4b_str_02-6679_1196174   | Listeria_monocytogenes_1639_v64 | 0.9284 |
| Listeria_monocytogenes_serotype_4b_str_02-1792_1196173   | Listeria_monocytogenes_1639_v64 | 0.9206 |
| Listeria_monocytogenes_serotype_4b_str_02-1289_1196172   | Listeria_monocytogenes_1639_v64 | 0.9206 |
| Listeria_monocytogenes_serotype_4b_str_02-1103_1196171   | Listeria_monocytogenes_1639_v64 | 0.9206 |
| Listeria_monocytogenes_serotype_3c_str_10-5027_1196195   | Listeria_monocytogenes_1639_v64 | 0.9516 |
| Listeria_monocytogenes_serotype_1_2c_str_10-5026_1196194 | Listeria_monocytogenes_1639_v64 | 0.9523 |
| Listeria_monocytogenes_serotype_1_2c_str_10-5025_1196193 | Listeria_monocytogenes_1639_v64 | 0.9523 |
| Listeria_monocytogenes_serotype_1_2b_str_10-0811_1196164 | Listeria_monocytogenes_1639_v64 | 0.9407 |
| Listeria_monocytogenes_serotype_1_2b_str_10-0810_1196163 | Listeria_monocytogenes_1639_v64 | 0.9407 |
| Listeria_monocytogenes_serotype_1_2a_str_99-6370_1196179 | Listeria_monocytogenes_1639_v64 | 0.9478 |
| Listeria_monocytogenes_serotype_1_2a_str_98-2035_1196178 | Listeria_monocytogenes_1639_v64 | 0.9478 |
| Listeria_monocytogenes_serotype_1_2a_str_95-0093_1196177 | Listeria_monocytogenes_1639_v64 | 0.9438 |
| Listeria_monocytogenes_serotype_1_2a_str_88-0478_1196176 | Listeria_monocytogenes_1639_v64 | 0.9449 |
| Listeria_monocytogenes_serotype_1_2a_str_10-5024_1196192 | Listeria_monocytogenes_1639_v64 | 0.9449 |
| Listeria_monocytogenes_serotype_1_2a_str_10-4758_1196168 | Listeria_monocytogenes_1639_v64 | 0.9564 |
| Listeria_monocytogenes_serotype_1_2a_str_10-4754_1196167 | Listeria_monocytogenes_1639_v64 | 0.9564 |
| Listeria_monocytogenes_serotype_1_2a_str_10-1321_1196191 | Listeria_monocytogenes_1639_v64 | 0.9449 |
| Listeria_monocytogenes_serotype_1_2a_str_10-1047_1196190 | Listeria_monocytogenes_1639_v64 | 0.9445 |
| Listeria_monocytogenes_serotype_1_2a_str_10-1046_1196189 | Listeria_monocytogenes_1639_v64 | 0.9445 |
| Listeria_monocytogenes_serotype_1_2a_str_10-0934_1196170 | Listeria_monocytogenes_1639_v64 | 0.9539 |
| Listeria_monocytogenes_serotype_1_2a_str_10-0933_1196169 | Listeria_monocytogenes_1639_v64 | 0.9539 |
| Listeria_monocytogenes_serotype_1_2a_str_10-0815_1196188 | Listeria_monocytogenes_1639_v64 | 0.9489 |
| Listeria_monocytogenes_serotype_1_2a_str_10-0814_1196187 | Listeria_monocytogenes_1639_v64 | 0.9445 |
| Listeria_monocytogenes_serotype_1_2a_str_10-0813_1196166 | Listeria_monocytogenes_1639_v64 | 0.9522 |
| Listeria_monocytogenes_serotype_1_2a_str_10-0812_1196165 | Listeria_monocytogenes_1639_v64 | 0.9522 |
| Listeria_monocytogenes_serotype_1_2a_str_08-7669_1196186 | Listeria_monocytogenes_1639_v64 | 0.9372 |
| Listeria_monocytogenes_serotype_1_2a_str_08-7374_1196185 | Listeria_monocytogenes_1639_v64 | 0.9449 |
| Listeria_monocytogenes_serotype_1_2a_str_08-6997_1196184 | Listeria_monocytogenes_1639_v64 | 0.9489 |
| Listeria_monocytogenes_serotype_1_2a_str_08-6569_1196183 | Listeria_monocytogenes_1639_v64 | 0.9489 |
| Listeria_monocytogenes_serotype_1_2a_str_08-6056_1196182 | Listeria_monocytogenes_1639_v64 | 0.9489 |
| Listeria_monocytogenes_serotype_1_2a_str_04-5457_1196181 | Listeria_monocytogenes_1639_v64 | 0.9449 |
| Listeria_monocytogenes_serotype_1_2a_str_02-5993_1196180 | Listeria_monocytogenes_1639_v64 | 0.9445 |
| Listeria_monocytogenes_R479a_1437838                     | Listeria_monocytogenes_1639_v64 | 0.9438 |
| Listeria_monocytogenes_N53-1_1234142                     | Listeria_monocytogenes_1639_v64 | 0.9013 |
| Listeria_monocytogenes_M7_1030009                        | Listeria_monocytogenes_1639_v64 | 0.9107 |
| Listeria_monocytogenes_LO28_393132                       | Listeria_monocytogenes_1639_v64 | 0.9476 |
| Listeria_monocytogenes_L99_563174                        | Listeria_monocytogenes_1639_v64 | 0.9113 |
| Listeria_monocytogenes_L312_882094                       | Listeria_monocytogenes_1639_v64 | 0.9339 |
| Listeria_monocytogenes_J1816_930781                      | Listeria_monocytogenes_1639_v64 | 0.912  |
| Listeria_monocytogenes_J1-220_930782                     | Listeria_monocytogenes_1639_v64 | 0.9201 |
| Listeria_monocytogenes_J0161_393130                      | Listeria_monocytogenes_1639_v64 | 0.9472 |
| Listeria_monocytogenes_HCC23_552536                      | Listeria_monocytogenes_1639_v64 | 0.9106 |
| Listeria_monocytogenes_FSL_R2-561_393126                 | Listeria_monocytogenes_1639_v64 | 0.9498 |
| Listeria_monocytogenes_FSL_J1-208_393119                 | Listeria_monocytogenes_1639_v64 | 0.8998 |
| Listeria_monocytogenes_FSL_J1-175_393118                 | Listeria_monocytogenes_1639_v64 | 0.9432 |
| Listeria_monocytogenes_Finland_1998_393127               | Listeria_monocytogenes_1639_v64 | 0.9528 |
| Listeria_monocytogenes_EGD-e_169963_v1                   | Listeria_monocytogenes_1639_v64 | 0.9456 |
| Listeria_monocytogenes_EGD-e_169963                      | Listeria_monocytogenes_1639_v64 | 0.9456 |
| Listeria_monocytogenes_EGD_1334565                       | Listeria_monocytogenes_1639_v64 | 0.9593 |
| Listeria_monocytogenes_CFSAN002349_1299895               | Listeria_monocytogenes_1639_v64 | 0.93   |
| Listeria_monocytogenes_ATCC_19117_882095_v1              | Listeria_monocytogenes_1639_v64 | 0.9275 |
| Listeria_monocytogenes_ATCC_19117_882095                 | Listeria_monocytogenes_1639_v64 | 0.9274 |
| Listeria_monocytogenes_6179_1288295                      | Listeria_monocytogenes_1639_v64 | 0.9428 |
| Listeria_monocytogenes_1639_v9                           | Listeria_monocytogenes_1639_v64 | 0.9211 |
| Listeria_monocytogenes_1639_v99                          | Listeria_monocytogenes_1639_v64 | 0.9142 |

|                                                          |                                 |        |
|----------------------------------------------------------|---------------------------------|--------|
| Listeria_monocytogenes_1639_v98                          | Listeria_monocytogenes_1639_v64 | 0.9445 |
| Listeria_monocytogenes_1639_v97                          | Listeria_monocytogenes_1639_v64 | 0.9233 |
| Listeria_monocytogenes_1639_v96                          | Listeria_monocytogenes_1639_v64 | 0.9128 |
| Listeria_monocytogenes_1639_v95                          | Listeria_monocytogenes_1639_v64 | 0.9128 |
| Listeria_monocytogenes_1639_v94                          | Listeria_monocytogenes_1639_v64 | 0.9132 |
| Listeria_monocytogenes_1639_v93                          | Listeria_monocytogenes_1639_v64 | 0.9449 |
| Listeria_monocytogenes_1639_v92                          | Listeria_monocytogenes_1639_v64 | 0.9143 |
| Listeria_monocytogenes_1639_v91                          | Listeria_monocytogenes_1639_v64 | 0.9238 |
| Listeria_monocytogenes_1639_v90                          | Listeria_monocytogenes_1639_v64 | 0.9445 |
| Listeria_monocytogenes_1639_v8                           | Listeria_monocytogenes_1639_v64 | 0.9328 |
| Listeria_monocytogenes_1639_v89                          | Listeria_monocytogenes_1639_v64 | 0.9226 |
| Listeria_monocytogenes_1639_v88                          | Listeria_monocytogenes_1639_v64 | 0.9504 |
| Listeria_monocytogenes_1639_v87                          | Listeria_monocytogenes_1639_v64 | 0.9491 |
| Listeria_monocytogenes_1639_v86                          | Listeria_monocytogenes_1639_v64 | 0.9483 |
| Listeria_monocytogenes_1639_v85                          | Listeria_monocytogenes_1639_v64 | 0.9178 |
| Listeria_monocytogenes_1639_v84                          | Listeria_monocytogenes_1639_v64 | 0.9529 |
| Listeria_monocytogenes_1639_v83                          | Listeria_monocytogenes_1639_v64 | 0.9193 |
| Listeria_monocytogenes_1639_v82                          | Listeria_monocytogenes_1639_v64 | 0.9187 |
| Listeria_monocytogenes_1639_v81                          | Listeria_monocytogenes_1639_v64 | 0.9541 |
| Listeria_monocytogenes_1639_v80                          | Listeria_monocytogenes_1639_v64 | 0.9349 |
| Listeria_monocytogenes_1639_v7                           | Listeria_monocytogenes_1639_v64 | 0.9328 |
| Listeria_monocytogenes_1639_v79                          | Listeria_monocytogenes_1639_v64 | 0.9486 |
| Listeria_monocytogenes_1639_v78                          | Listeria_monocytogenes_1639_v64 | 0.953  |
| Listeria_monocytogenes_1639_v77                          | Listeria_monocytogenes_1639_v64 | 0.945  |
| Listeria_monocytogenes_1639_v76                          | Listeria_monocytogenes_1639_v64 | 0.9508 |
| Listeria_monocytogenes_1639_v75                          | Listeria_monocytogenes_1639_v64 | 0.9113 |
| Listeria_monocytogenes_1639_v74                          | Listeria_monocytogenes_1639_v64 | 0.9346 |
| Listeria_monocytogenes_1639_v73                          | Listeria_monocytogenes_1639_v64 | 0.946  |
| Listeria_monocytogenes_1639_v72                          | Listeria_monocytogenes_1639_v64 | 0.9178 |
| Listeria_monocytogenes_1639_v71                          | Listeria_monocytogenes_1639_v64 | 0.9436 |
| Listeria_monocytogenes_1639_v70                          | Listeria_monocytogenes_1639_v64 | 0.9507 |
| Listeria_monocytogenes_1639_v6                           | Listeria_monocytogenes_1639_v64 | 0.9321 |
| Listeria_monocytogenes_1639_v69                          | Listeria_monocytogenes_1639_v64 | 0.9198 |
| Listeria_monocytogenes_1639_v68                          | Listeria_monocytogenes_1639_v64 | 0.944  |
| Listeria_monocytogenes_1639_v67                          | Listeria_monocytogenes_1639_v64 | 0.9354 |
| Listeria_monocytogenes_1639_v66                          | Listeria_monocytogenes_1639_v64 | 0.9591 |
| Listeria_monocytogenes_1639_v65                          | Listeria_monocytogenes_1639_v64 | 0.957  |
| Listeria_monocytogenes_1639_v64                          | Listeria_monocytogenes_1639_v64 | 0.0697 |
| Listeria_welshimeri_1643                                 | Listeria_monocytogenes_1639_v65 | 0.8693 |
| Listeria_welshimeri_serovar_6b_str_SLCC5334_386043       | Listeria_monocytogenes_1639_v65 | 0.8686 |
| Listeria_seeligeri_serovar_1_2b_str_SLCC3954_683837      | Listeria_monocytogenes_1639_v65 | 0.8732 |
| Listeria_seeligeri_FSL_S4-171_702452                     | Listeria_monocytogenes_1639_v65 | 0.8087 |
| Listeria_seeligeri_FSL_N1-067_702453                     | Listeria_monocytogenes_1639_v65 | 0.829  |
| Listeria_seeligeri_1640_v1                               | Listeria_monocytogenes_1639_v65 | 0.8695 |
| Listeria_seeligeri_1640                                  | Listeria_monocytogenes_1639_v65 | 0.8742 |
| Listeria_monocytogenes_WSLC1042_1457188                  | Listeria_monocytogenes_1639_v65 | 0.9191 |
| Listeria_monocytogenes_WSLC1001_1457187                  | Listeria_monocytogenes_1639_v65 | 0.9537 |
| Listeria_monocytogenes_SLCC7179_879090                   | Listeria_monocytogenes_1639_v65 | 0.9563 |
| Listeria_monocytogenes_SLCC5850_882096                   | Listeria_monocytogenes_1639_v65 | 0.9543 |
| Listeria_monocytogenes_SLCC2755_932919                   | Listeria_monocytogenes_1639_v65 | 0.9194 |
| Listeria_monocytogenes_SLCC2540_879089                   | Listeria_monocytogenes_1639_v65 | 0.9343 |
| Listeria_monocytogenes_SLCC2479_882020                   | Listeria_monocytogenes_1639_v65 | 0.9485 |
| Listeria_monocytogenes_SLCC2378_879088                   | Listeria_monocytogenes_1639_v65 | 0.9205 |
| Listeria_monocytogenes_SLCC2376_882097                   | Listeria_monocytogenes_1639_v65 | 0.9245 |
| Listeria_monocytogenes_SLCC2372_932920                   | Listeria_monocytogenes_1639_v65 | 0.9412 |
| Listeria_monocytogenes_serotype_4b_str_LL195_1230340     | Listeria_monocytogenes_1639_v65 | 0.926  |
| Listeria_monocytogenes_serotype_4b_str_LIS0087_1134669   | Listeria_monocytogenes_1639_v65 | 0.9407 |
| Listeria_monocytogenes_serotype_4b_str_F2365_265669      | Listeria_monocytogenes_1639_v65 | 0.926  |
| Listeria_monocytogenes_serotype_4b_str_CLIP_80459_568819 | Listeria_monocytogenes_1639_v65 | 0.9328 |
| Listeria_monocytogenes_serotype_4b_str_81-0861_1196161   | Listeria_monocytogenes_1639_v65 | 0.9236 |
| Listeria_monocytogenes_serotype_4b_str_81-0592_1196160   | Listeria_monocytogenes_1639_v65 | 0.9247 |
| Listeria_monocytogenes_serotype_4b_str_81-0558_1196159   | Listeria_monocytogenes_1639_v65 | 0.9254 |
| Listeria_monocytogenes_serotype_4b_str_10-0809_1196162   | Listeria_monocytogenes_1639_v65 | 0.9247 |
| Listeria_monocytogenes_serotype_4b_str_02-6680_1196175   | Listeria_monocytogenes_1639_v65 | 0.9291 |
| Listeria_monocytogenes_serotype_4b_str_02-6679_1196174   | Listeria_monocytogenes_1639_v65 | 0.9291 |
| Listeria_monocytogenes_serotype_4b_str_02-1792_1196173   | Listeria_monocytogenes_1639_v65 | 0.9265 |
| Listeria_monocytogenes_serotype_4b_str_02-1289_1196172   | Listeria_monocytogenes_1639_v65 | 0.9265 |
| Listeria_monocytogenes_serotype_4b_str_02-1103_1196171   | Listeria_monocytogenes_1639_v65 | 0.9265 |
| Listeria_monocytogenes_serotype_3c_str_10-5027_1196195   | Listeria_monocytogenes_1639_v65 | 0.9526 |
| Listeria_monocytogenes_serotype_1_2c_str_10-5026_1196194 | Listeria_monocytogenes_1639_v65 | 0.9537 |
| Listeria_monocytogenes_serotype_1_2c_str_10-5025_1196193 | Listeria_monocytogenes_1639_v65 | 0.9537 |
| Listeria_monocytogenes_serotype_1_2b_str_10-0811_1196164 | Listeria_monocytogenes_1639_v65 | 0.955  |
| Listeria_monocytogenes_serotype_1_2b_str_10-0810_1196163 | Listeria_monocytogenes_1639_v65 | 0.955  |
| Listeria_monocytogenes_serotype_1_2a_str_99-6370_1196179 | Listeria_monocytogenes_1639_v65 | 0.9726 |
| Listeria_monocytogenes_serotype_1_2a_str_98-2035_1196178 | Listeria_monocytogenes_1639_v65 | 0.9726 |
| Listeria_monocytogenes_serotype_1_2a_str_95-0093_1196177 | Listeria_monocytogenes_1639_v65 | 0.9673 |
| Listeria_monocytogenes_serotype_1_2a_str_88-0478_1196176 | Listeria_monocytogenes_1639_v65 | 0.9669 |
| Listeria_monocytogenes_serotype_1_2a_str_10-5024_1196192 | Listeria_monocytogenes_1639_v65 | 0.9672 |
| Listeria_monocytogenes_serotype_1_2a_str_10-4758_1196168 | Listeria_monocytogenes_1639_v65 | 0.9514 |
| Listeria_monocytogenes_serotype_1_2a_str_10-4754_1196167 | Listeria_monocytogenes_1639_v65 | 0.9514 |
| Listeria_monocytogenes_serotype_1_2a_str_10-1321_1196191 | Listeria_monocytogenes_1639_v65 | 0.9672 |
| Listeria_monocytogenes_serotype_1_2a_str_10-1047_1196190 | Listeria_monocytogenes_1639_v65 | 0.968  |
| Listeria_monocytogenes_serotype_1_2a_str_10-1046_1196189 | Listeria_monocytogenes_1639_v65 | 0.968  |
| Listeria_monocytogenes_serotype_1_2a_str_10-0934_1196170 | Listeria_monocytogenes_1639_v65 | 0.9523 |
| Listeria_monocytogenes_serotype_1_2a_str_10-0933_1196169 | Listeria_monocytogenes_1639_v65 | 0.9523 |
| Listeria_monocytogenes_serotype_1_2a_str_10-0815_1196188 | Listeria_monocytogenes_1639_v65 | 0.9714 |
| Listeria_monocytogenes_serotype_1_2a_str_10-0814_1196187 | Listeria_monocytogenes_1639_v65 | 0.9673 |
| Listeria_monocytogenes_serotype_1_2a_str_10-0813_1196166 | Listeria_monocytogenes_1639_v65 | 0.9617 |
| Listeria_monocytogenes_serotype_1_2a_str_10-0812_1196165 | Listeria_monocytogenes_1639_v65 | 0.9617 |
| Listeria_monocytogenes_serotype_1_2a_str_08-7669_1196186 | Listeria_monocytogenes_1639_v65 | 0.9613 |
| Listeria_monocytogenes_serotype_1_2a_str_08-7374_1196185 | Listeria_monocytogenes_1639_v65 | 0.9672 |

|                                                          |                                 |        |
|----------------------------------------------------------|---------------------------------|--------|
| Listeria_monocytogenes_serotype_1_2a_str_08-6997_1196184 | Listeria_monocytogenes_1639_v65 | 0.9714 |
| Listeria_monocytogenes_serotype_1_2a_str_08-6569_1196183 | Listeria_monocytogenes_1639_v65 | 0.9714 |
| Listeria_monocytogenes_serotype_1_2a_str_08-6056_1196182 | Listeria_monocytogenes_1639_v65 | 0.9714 |
| Listeria_monocytogenes_serotype_1_2a_str_04-5457_1196181 | Listeria_monocytogenes_1639_v65 | 0.9672 |
| Listeria_monocytogenes_serotype_1_2a_str_02-5993_1196180 | Listeria_monocytogenes_1639_v65 | 0.9669 |
| Listeria_monocytogenes_R479a_1437838                     | Listeria_monocytogenes_1639_v65 | 0.9654 |
| Listeria_monocytogenes_N53-1_1234142                     | Listeria_monocytogenes_1639_v65 | 0.8992 |
| Listeria_monocytogenes_M7_1030009                        | Listeria_monocytogenes_1639_v65 | 0.9089 |
| Listeria_monocytogenes_LO28_393132                       | Listeria_monocytogenes_1639_v65 | 0.9549 |
| Listeria_monocytogenes_L99_563174                        | Listeria_monocytogenes_1639_v65 | 0.9096 |
| Listeria_monocytogenes_L312_882094                       | Listeria_monocytogenes_1639_v65 | 0.9328 |
| Listeria_monocytogenes_J1816_930781                      | Listeria_monocytogenes_1639_v65 | 0.9198 |
| Listeria_monocytogenes_J1-220_930782                     | Listeria_monocytogenes_1639_v65 | 0.93   |
| Listeria_monocytogenes_J0161_393130                      | Listeria_monocytogenes_1639_v65 | 0.9467 |
| Listeria_monocytogenes_HCC23_552536                      | Listeria_monocytogenes_1639_v65 | 0.9089 |
| Listeria_monocytogenes_FSL_R2-561_393126                 | Listeria_monocytogenes_1639_v65 | 0.9486 |
| Listeria_monocytogenes_FSL_J1-208_393119                 | Listeria_monocytogenes_1639_v65 | 0.8894 |
| Listeria_monocytogenes_FSL_J1-175_393118                 | Listeria_monocytogenes_1639_v65 | 0.9348 |
| Listeria_monocytogenes_Finland_1998_393127               | Listeria_monocytogenes_1639_v65 | 0.9526 |
| Listeria_monocytogenes_EGD-e_169963_v1                   | Listeria_monocytogenes_1639_v65 | 0.9518 |
| Listeria_monocytogenes_EGD-e_169963                      | Listeria_monocytogenes_1639_v65 | 0.9522 |
| Listeria_monocytogenes_EGD_1334565                       | Listeria_monocytogenes_1639_v65 | 0.955  |
| Listeria_monocytogenes_CFSAN002349_1299895               | Listeria_monocytogenes_1639_v65 | 0.9296 |
| Listeria_monocytogenes_ATCC_19117_882095_v1              | Listeria_monocytogenes_1639_v65 | 0.9241 |
| Listeria_monocytogenes_ATCC_19117_882095                 | Listeria_monocytogenes_1639_v65 | 0.924  |
| Listeria_monocytogenes_6179_1288295                      | Listeria_monocytogenes_1639_v65 | 0.9453 |
| Listeria_monocytogenes_1639_v9                           | Listeria_monocytogenes_1639_v65 | 0.9272 |
| Listeria_monocytogenes_1639_v99                          | Listeria_monocytogenes_1639_v65 | 0.9205 |
| Listeria_monocytogenes_1639_v98                          | Listeria_monocytogenes_1639_v65 | 0.9519 |
| Listeria_monocytogenes_1639_v97                          | Listeria_monocytogenes_1639_v65 | 0.9244 |
| Listeria_monocytogenes_1639_v96                          | Listeria_monocytogenes_1639_v65 | 0.9202 |
| Listeria_monocytogenes_1639_v95                          | Listeria_monocytogenes_1639_v65 | 0.9203 |
| Listeria_monocytogenes_1639_v94                          | Listeria_monocytogenes_1639_v65 | 0.9206 |
| Listeria_monocytogenes_1639_v93                          | Listeria_monocytogenes_1639_v65 | 0.937  |
| Listeria_monocytogenes_1639_v92                          | Listeria_monocytogenes_1639_v65 | 0.9202 |
| Listeria_monocytogenes_1639_v91                          | Listeria_monocytogenes_1639_v65 | 0.9326 |
| Listeria_monocytogenes_1639_v90                          | Listeria_monocytogenes_1639_v65 | 0.9519 |
| Listeria_monocytogenes_1639_v8                           | Listeria_monocytogenes_1639_v65 | 0.9535 |
| Listeria_monocytogenes_1639_v89                          | Listeria_monocytogenes_1639_v65 | 0.9364 |
| Listeria_monocytogenes_1639_v88                          | Listeria_monocytogenes_1639_v65 | 0.9528 |
| Listeria_monocytogenes_1639_v87                          | Listeria_monocytogenes_1639_v65 | 0.9567 |
| Listeria_monocytogenes_1639_v86                          | Listeria_monocytogenes_1639_v65 | 0.956  |
| Listeria_monocytogenes_1639_v85                          | Listeria_monocytogenes_1639_v65 | 0.9237 |
| Listeria_monocytogenes_1639_v84                          | Listeria_monocytogenes_1639_v65 | 0.9527 |
| Listeria_monocytogenes_1639_v83                          | Listeria_monocytogenes_1639_v65 | 0.9272 |
| Listeria_monocytogenes_1639_v82                          | Listeria_monocytogenes_1639_v65 | 0.9268 |
| Listeria_monocytogenes_1639_v81                          | Listeria_monocytogenes_1639_v65 | 0.9584 |
| Listeria_monocytogenes_1639_v80                          | Listeria_monocytogenes_1639_v65 | 0.9438 |
| Listeria_monocytogenes_1639_v7                           | Listeria_monocytogenes_1639_v65 | 0.9535 |
| Listeria_monocytogenes_1639_v79                          | Listeria_monocytogenes_1639_v65 | 0.9526 |
| Listeria_monocytogenes_1639_v78                          | Listeria_monocytogenes_1639_v65 | 0.9581 |
| Listeria_monocytogenes_1639_v77                          | Listeria_monocytogenes_1639_v65 | 0.9437 |
| Listeria_monocytogenes_1639_v76                          | Listeria_monocytogenes_1639_v65 | 0.9517 |
| Listeria_monocytogenes_1639_v75                          | Listeria_monocytogenes_1639_v65 | 0.9096 |
| Listeria_monocytogenes_1639_v74                          | Listeria_monocytogenes_1639_v65 | 0.9434 |
| Listeria_monocytogenes_1639_v73                          | Listeria_monocytogenes_1639_v65 | 0.9551 |
| Listeria_monocytogenes_1639_v72                          | Listeria_monocytogenes_1639_v65 | 0.9263 |
| Listeria_monocytogenes_1639_v71                          | Listeria_monocytogenes_1639_v65 | 0.9325 |
| Listeria_monocytogenes_1639_v70                          | Listeria_monocytogenes_1639_v65 | 0.9494 |
| Listeria_monocytogenes_1639_v6                           | Listeria_monocytogenes_1639_v65 | 0.9528 |
| Listeria_monocytogenes_1639_v69                          | Listeria_monocytogenes_1639_v65 | 0.925  |
| Listeria_monocytogenes_1639_v68                          | Listeria_monocytogenes_1639_v65 | 0.9454 |
| Listeria_monocytogenes_1639_v67                          | Listeria_monocytogenes_1639_v65 | 0.9324 |
| Listeria_monocytogenes_1639_v66                          | Listeria_monocytogenes_1639_v65 | 0.9522 |
| Listeria_monocytogenes_1639_v65                          | Listeria_monocytogenes_1639_v65 | 0.069  |
| Listeria_welshimeri_1643                                 | Listeria_monocytogenes_1639_v66 | 0.8745 |
| Listeria_welshimeri_serovar_6b_str_SLCC5334_386043       | Listeria_monocytogenes_1639_v66 | 0.8739 |
| Listeria_seeligeri_serovar_1_2b_str_SLCC3954_683837      | Listeria_monocytogenes_1639_v66 | 0.8844 |
| Listeria_seeligeri_FSL_S4-171_702452                     | Listeria_monocytogenes_1639_v66 | 0.8148 |
| Listeria_seeligeri_FSL_N1-067_702453                     | Listeria_monocytogenes_1639_v66 | 0.834  |
| Listeria_seeligeri_1640_v1                               | Listeria_monocytogenes_1639_v66 | 0.8794 |
| Listeria_seeligeri_1640                                  | Listeria_monocytogenes_1639_v66 | 0.876  |
| Listeria_monocytogenes_WSLC1042_1457188                  | Listeria_monocytogenes_1639_v66 | 0.9303 |
| Listeria_monocytogenes_WSLC1001_1457187                  | Listeria_monocytogenes_1639_v66 | 0.9637 |
| Listeria_monocytogenes_SLCC7179_879090                   | Listeria_monocytogenes_1639_v66 | 0.9566 |
| Listeria_monocytogenes_SLCC5850_882096                   | Listeria_monocytogenes_1639_v66 | 0.9659 |
| Listeria_monocytogenes_SLCC2755_932919                   | Listeria_monocytogenes_1639_v66 | 0.9323 |
| Listeria_monocytogenes_SLCC2540_879089                   | Listeria_monocytogenes_1639_v66 | 0.9445 |
| Listeria_monocytogenes_SLCC2479_882020                   | Listeria_monocytogenes_1639_v66 | 0.9561 |
| Listeria_monocytogenes_SLCC2378_879088                   | Listeria_monocytogenes_1639_v66 | 0.9317 |
| Listeria_monocytogenes_SLCC2376_882097                   | Listeria_monocytogenes_1639_v66 | 0.9359 |
| Listeria_monocytogenes_SLCC2372_932920                   | Listeria_monocytogenes_1639_v66 | 0.9494 |
| Listeria_monocytogenes_serotype_4b_str_LL195_1230340     | Listeria_monocytogenes_1639_v66 | 0.9373 |
| Listeria_monocytogenes_serotype_4b_str_LIS0087_1134669   | Listeria_monocytogenes_1639_v66 | 0.9399 |
| Listeria_monocytogenes_serotype_4b_str_F2365_265669      | Listeria_monocytogenes_1639_v66 | 0.9373 |
| Listeria_monocytogenes_serotype_4b_str_CLIP_80459_568819 | Listeria_monocytogenes_1639_v66 | 0.9384 |
| Listeria_monocytogenes_serotype_4b_str_81-0861_1196161   | Listeria_monocytogenes_1639_v66 | 0.9223 |
| Listeria_monocytogenes_serotype_4b_str_81-0592_1196160   | Listeria_monocytogenes_1639_v66 | 0.9234 |
| Listeria_monocytogenes_serotype_4b_str_81-0558_1196159   | Listeria_monocytogenes_1639_v66 | 0.9241 |
| Listeria_monocytogenes_serotype_4b_str_10-0809_1196162   | Listeria_monocytogenes_1639_v66 | 0.9234 |
| Listeria_monocytogenes_serotype_4b_str_02-6680_1196175   | Listeria_monocytogenes_1639_v66 | 0.9363 |

|                                                          |                                 |        |
|----------------------------------------------------------|---------------------------------|--------|
| Listeria_monocytogenes_serotype_4b_str_02-6679_1196174   | Listeria_monocytogenes_1639_v66 | 0.9363 |
| Listeria_monocytogenes_serotype_4b_str_02-1792_1196173   | Listeria_monocytogenes_1639_v66 | 0.9248 |
| Listeria_monocytogenes_serotype_4b_str_02-1289_1196172   | Listeria_monocytogenes_1639_v66 | 0.9248 |
| Listeria_monocytogenes_serotype_4b_str_02-1103_1196171   | Listeria_monocytogenes_1639_v66 | 0.9248 |
| Listeria_monocytogenes_serotype_3c_str_10-5027_1196195   | Listeria_monocytogenes_1639_v66 | 0.9572 |
| Listeria_monocytogenes_serotype_1_2c_str_10-5026_1196194 | Listeria_monocytogenes_1639_v66 | 0.958  |
| Listeria_monocytogenes_serotype_1_2c_str_10-5025_1196193 | Listeria_monocytogenes_1639_v66 | 0.958  |
| Listeria_monocytogenes_serotype_1_2b_str_10-0811_1196164 | Listeria_monocytogenes_1639_v66 | 0.9358 |
| Listeria_monocytogenes_serotype_1_2b_str_10-0810_1196163 | Listeria_monocytogenes_1639_v66 | 0.9358 |
| Listeria_monocytogenes_serotype_1_2a_str_99-6370_1196179 | Listeria_monocytogenes_1639_v66 | 0.9434 |
| Listeria_monocytogenes_serotype_1_2a_str_98-2035_1196178 | Listeria_monocytogenes_1639_v66 | 0.9434 |
| Listeria_monocytogenes_serotype_1_2a_str_95-0093_1196177 | Listeria_monocytogenes_1639_v66 | 0.9486 |
| Listeria_monocytogenes_serotype_1_2a_str_88-0478_1196176 | Listeria_monocytogenes_1639_v66 | 0.9489 |
| Listeria_monocytogenes_serotype_1_2a_str_10-5024_1196192 | Listeria_monocytogenes_1639_v66 | 0.9493 |
| Listeria_monocytogenes_serotype_1_2a_str_10-4758_1196168 | Listeria_monocytogenes_1639_v66 | 0.9674 |
| Listeria_monocytogenes_serotype_1_2a_str_10-4754_1196167 | Listeria_monocytogenes_1639_v66 | 0.9674 |
| Listeria_monocytogenes_serotype_1_2a_str_10-1321_1196191 | Listeria_monocytogenes_1639_v66 | 0.9493 |
| Listeria_monocytogenes_serotype_1_2a_str_10-1047_1196190 | Listeria_monocytogenes_1639_v66 | 0.9497 |
| Listeria_monocytogenes_serotype_1_2a_str_10-1046_1196189 | Listeria_monocytogenes_1639_v66 | 0.9497 |
| Listeria_monocytogenes_serotype_1_2a_str_10-0934_1196170 | Listeria_monocytogenes_1639_v66 | 0.9632 |
| Listeria_monocytogenes_serotype_1_2a_str_10-0933_1196169 | Listeria_monocytogenes_1639_v66 | 0.9632 |
| Listeria_monocytogenes_serotype_1_2a_str_10-0815_1196188 | Listeria_monocytogenes_1639_v66 | 0.9448 |
| Listeria_monocytogenes_serotype_1_2a_str_10-0814_1196187 | Listeria_monocytogenes_1639_v66 | 0.949  |
| Listeria_monocytogenes_serotype_1_2a_str_10-0813_1196166 | Listeria_monocytogenes_1639_v66 | 0.9571 |
| Listeria_monocytogenes_serotype_1_2a_str_10-0812_1196165 | Listeria_monocytogenes_1639_v66 | 0.9571 |
| Listeria_monocytogenes_serotype_1_2a_str_08-7669_1196186 | Listeria_monocytogenes_1639_v66 | 0.9454 |
| Listeria_monocytogenes_serotype_1_2a_str_08-7374_1196185 | Listeria_monocytogenes_1639_v66 | 0.9493 |
| Listeria_monocytogenes_serotype_1_2a_str_08-6997_1196184 | Listeria_monocytogenes_1639_v66 | 0.9448 |
| Listeria_monocytogenes_serotype_1_2a_str_08-6569_1196183 | Listeria_monocytogenes_1639_v66 | 0.9448 |
| Listeria_monocytogenes_serotype_1_2a_str_08-6056_1196182 | Listeria_monocytogenes_1639_v66 | 0.9448 |
| Listeria_monocytogenes_serotype_1_2a_str_04-5457_1196181 | Listeria_monocytogenes_1639_v66 | 0.9493 |
| Listeria_monocytogenes_serotype_1_2a_str_02-5993_1196180 | Listeria_monocytogenes_1639_v66 | 0.949  |
| Listeria_monocytogenes_R479a_1437838                     | Listeria_monocytogenes_1639_v66 | 0.9472 |
| Listeria_monocytogenes_N53-1_1234142                     | Listeria_monocytogenes_1639_v66 | 0.9071 |
| Listeria_monocytogenes_M7_1030009                        | Listeria_monocytogenes_1639_v66 | 0.9107 |
| Listeria_monocytogenes_LO28_393132                       | Listeria_monocytogenes_1639_v66 | 0.9551 |
| Listeria_monocytogenes_L99_563174                        | Listeria_monocytogenes_1639_v66 | 0.9114 |
| Listeria_monocytogenes_L312_882094                       | Listeria_monocytogenes_1639_v66 | 0.9384 |
| Listeria_monocytogenes_J1816_930781                      | Listeria_monocytogenes_1639_v66 | 0.9203 |
| Listeria_monocytogenes_J1-220_930782                     | Listeria_monocytogenes_1639_v66 | 0.9236 |
| Listeria_monocytogenes_J0161_393130                      | Listeria_monocytogenes_1639_v66 | 0.9461 |
| Listeria_monocytogenes_HCC23_552536                      | Listeria_monocytogenes_1639_v66 | 0.9115 |
| Listeria_monocytogenes_FSL_R2-561_393126                 | Listeria_monocytogenes_1639_v66 | 0.9569 |
| Listeria_monocytogenes_FSL_J1-208_393119                 | Listeria_monocytogenes_1639_v66 | 0.9047 |
| Listeria_monocytogenes_FSL_J1-175_393118                 | Listeria_monocytogenes_1639_v66 | 0.9488 |
| Listeria_monocytogenes_Finland_1998_393127               | Listeria_monocytogenes_1639_v66 | 0.9612 |
| Listeria_monocytogenes_EGD-e_169963_v1                   | Listeria_monocytogenes_1639_v66 | 0.9527 |
| Listeria_monocytogenes_EGD-e_169963                      | Listeria_monocytogenes_1639_v66 | 0.9527 |
| Listeria_monocytogenes_EGD_1334565                       | Listeria_monocytogenes_1639_v66 | 0.9666 |
| Listeria_monocytogenes_CFSAN002349_1299895               | Listeria_monocytogenes_1639_v66 | 0.9375 |
| Listeria_monocytogenes_ATCC_19117_882095_v1              | Listeria_monocytogenes_1639_v66 | 0.9334 |
| Listeria_monocytogenes_ATCC_19117_882095                 | Listeria_monocytogenes_1639_v66 | 0.9334 |
| Listeria_monocytogenes_6179_1288295                      | Listeria_monocytogenes_1639_v66 | 0.9472 |
| Listeria_monocytogenes_1639_v9                           | Listeria_monocytogenes_1639_v66 | 0.9223 |
| Listeria_monocytogenes_1639_v99                          | Listeria_monocytogenes_1639_v66 | 0.9214 |
| Listeria_monocytogenes_1639_v98                          | Listeria_monocytogenes_1639_v66 | 0.9423 |
| Listeria_monocytogenes_1639_v97                          | Listeria_monocytogenes_1639_v66 | 0.9299 |
| Listeria_monocytogenes_1639_v96                          | Listeria_monocytogenes_1639_v66 | 0.92   |
| Listeria_monocytogenes_1639_v95                          | Listeria_monocytogenes_1639_v66 | 0.92   |
| Listeria_monocytogenes_1639_v94                          | Listeria_monocytogenes_1639_v66 | 0.92   |
| Listeria_monocytogenes_1639_v93                          | Listeria_monocytogenes_1639_v66 | 0.9538 |
| Listeria_monocytogenes_1639_v92                          | Listeria_monocytogenes_1639_v66 | 0.9211 |
| Listeria_monocytogenes_1639_v91                          | Listeria_monocytogenes_1639_v66 | 0.9292 |
| Listeria_monocytogenes_1639_v90                          | Listeria_monocytogenes_1639_v66 | 0.9423 |
| Listeria_monocytogenes_1639_v8                           | Listeria_monocytogenes_1639_v66 | 0.9363 |
| Listeria_monocytogenes_1639_v89                          | Listeria_monocytogenes_1639_v66 | 0.9349 |
| Listeria_monocytogenes_1639_v88                          | Listeria_monocytogenes_1639_v66 | 0.9568 |
| Listeria_monocytogenes_1639_v87                          | Listeria_monocytogenes_1639_v66 | 0.9551 |
| Listeria_monocytogenes_1639_v86                          | Listeria_monocytogenes_1639_v66 | 0.9543 |
| Listeria_monocytogenes_1639_v85                          | Listeria_monocytogenes_1639_v66 | 0.922  |
| Listeria_monocytogenes_1639_v84                          | Listeria_monocytogenes_1639_v66 | 0.9582 |
| Listeria_monocytogenes_1639_v83                          | Listeria_monocytogenes_1639_v66 | 0.9251 |
| Listeria_monocytogenes_1639_v82                          | Listeria_monocytogenes_1639_v66 | 0.9248 |
| Listeria_monocytogenes_1639_v81                          | Listeria_monocytogenes_1639_v66 | 0.9571 |
| Listeria_monocytogenes_1639_v80                          | Listeria_monocytogenes_1639_v66 | 0.942  |
| Listeria_monocytogenes_1639_v7                           | Listeria_monocytogenes_1639_v66 | 0.9363 |
| Listeria_monocytogenes_1639_v79                          | Listeria_monocytogenes_1639_v66 | 0.9527 |
| Listeria_monocytogenes_1639_v78                          | Listeria_monocytogenes_1639_v66 | 0.9572 |
| Listeria_monocytogenes_1639_v77                          | Listeria_monocytogenes_1639_v66 | 0.9487 |
| Listeria_monocytogenes_1639_v76                          | Listeria_monocytogenes_1639_v66 | 0.9508 |
| Listeria_monocytogenes_1639_v75                          | Listeria_monocytogenes_1639_v66 | 0.9114 |
| Listeria_monocytogenes_1639_v74                          | Listeria_monocytogenes_1639_v66 | 0.939  |
| Listeria_monocytogenes_1639_v73                          | Listeria_monocytogenes_1639_v66 | 0.9508 |
| Listeria_monocytogenes_1639_v72                          | Listeria_monocytogenes_1639_v66 | 0.9235 |
| Listeria_monocytogenes_1639_v71                          | Listeria_monocytogenes_1639_v66 | 0.9424 |
| Listeria_monocytogenes_1639_v70                          | Listeria_monocytogenes_1639_v66 | 0.9563 |
| Listeria_monocytogenes_1639_v6                           | Listeria_monocytogenes_1639_v66 | 0.9356 |
| Listeria_monocytogenes_1639_v69                          | Listeria_monocytogenes_1639_v66 | 0.9237 |
| Listeria_monocytogenes_1639_v68                          | Listeria_monocytogenes_1639_v66 | 0.9473 |
| Listeria_monocytogenes_1639_v67                          | Listeria_monocytogenes_1639_v66 | 0.9391 |
| Listeria_monocytogenes_1639_v66                          | Listeria_monocytogenes_1639_v66 | 0.0768 |



|                                                          |                                 |        |
|----------------------------------------------------------|---------------------------------|--------|
| Listeria_welshimeri_1643                                 | Listeria_monocytogenes_1639_v67 | 0.8707 |
| Listeria_welshimeri_serovar_6b_str_SLCC5334_386043       | Listeria_monocytogenes_1639_v67 | 0.8701 |
| Listeria_seeligeri_serovar_1_2b_str_SLCC3954_683837      | Listeria_monocytogenes_1639_v67 | 0.8797 |
| Listeria_seeligeri_FSL_S4-171_702452                     | Listeria_monocytogenes_1639_v67 | 0.8238 |
| Listeria_seeligeri_FSL_N1-067_702453                     | Listeria_monocytogenes_1639_v67 | 0.8373 |
| Listeria_seeligeri_1640_v1                               | Listeria_monocytogenes_1639_v67 | 0.8835 |
| Listeria_seeligeri_1640                                  | Listeria_monocytogenes_1639_v67 | 0.8768 |
| Listeria_monocytogenes_WSLC1042_1457188                  | Listeria_monocytogenes_1639_v67 | 0.9424 |
| Listeria_monocytogenes_WSLC1001_1457187                  | Listeria_monocytogenes_1639_v67 | 0.9414 |
| Listeria_monocytogenes_SLCC7179_879090                   | Listeria_monocytogenes_1639_v67 | 0.9371 |
| Listeria_monocytogenes_SLCC5850_882096                   | Listeria_monocytogenes_1639_v67 | 0.9412 |
| Listeria_monocytogenes_SLCC2755_932919                   | Listeria_monocytogenes_1639_v67 | 0.9432 |
| Listeria_monocytogenes_SLCC2540_879089                   | Listeria_monocytogenes_1639_v67 | 0.9606 |
| Listeria_monocytogenes_SLCC2479_882020                   | Listeria_monocytogenes_1639_v67 | 0.9478 |
| Listeria_monocytogenes_SLCC2378_879088                   | Listeria_monocytogenes_1639_v67 | 0.9438 |
| Listeria_monocytogenes_SLCC2376_882097                   | Listeria_monocytogenes_1639_v67 | 0.9282 |
| Listeria_monocytogenes_SLCC2372_932920                   | Listeria_monocytogenes_1639_v67 | 0.9401 |
| Listeria_monocytogenes_serotype_4b_str_LL195_1230340     | Listeria_monocytogenes_1639_v67 | 0.9495 |
| Listeria_monocytogenes_serotype_4b_str_LIS0087_1134669   | Listeria_monocytogenes_1639_v67 | 0.9266 |
| Listeria_monocytogenes_serotype_4b_str_F2365_265669      | Listeria_monocytogenes_1639_v67 | 0.9495 |
| Listeria_monocytogenes_serotype_4b_str_CLIP_80459_568819 | Listeria_monocytogenes_1639_v67 | 0.949  |
| Listeria_monocytogenes_serotype_4b_str_81-0861_1196161   | Listeria_monocytogenes_1639_v67 | 0.9396 |
| Listeria_monocytogenes_serotype_4b_str_81-0592_1196160   | Listeria_monocytogenes_1639_v67 | 0.9406 |
| Listeria_monocytogenes_serotype_4b_str_81-0558_1196159   | Listeria_monocytogenes_1639_v67 | 0.9413 |
| Listeria_monocytogenes_serotype_4b_str_10-0809_1196162   | Listeria_monocytogenes_1639_v67 | 0.9406 |
| Listeria_monocytogenes_serotype_4b_str_02-6680_1196175   | Listeria_monocytogenes_1639_v67 | 0.9499 |
| Listeria_monocytogenes_serotype_4b_str_02-6679_1196174   | Listeria_monocytogenes_1639_v67 | 0.9499 |
| Listeria_monocytogenes_serotype_4b_str_02-1792_1196173   | Listeria_monocytogenes_1639_v67 | 0.9417 |
| Listeria_monocytogenes_serotype_4b_str_02-1289_1196172   | Listeria_monocytogenes_1639_v67 | 0.9417 |
| Listeria_monocytogenes_serotype_4b_str_02-1103_1196171   | Listeria_monocytogenes_1639_v67 | 0.9417 |
| Listeria_monocytogenes_serotype_3c_str_10-5027_1196195   | Listeria_monocytogenes_1639_v67 | 0.9437 |
| Listeria_monocytogenes_serotype_1_2c_str_10-5026_1196194 | Listeria_monocytogenes_1639_v67 | 0.9448 |
| Listeria_monocytogenes_serotype_1_2c_str_10-5025_1196193 | Listeria_monocytogenes_1639_v67 | 0.9448 |
| Listeria_monocytogenes_serotype_1_2b_str_10-0811_1196164 | Listeria_monocytogenes_1639_v67 | 0.954  |
| Listeria_monocytogenes_serotype_1_2b_str_10-0810_1196163 | Listeria_monocytogenes_1639_v67 | 0.954  |
| Listeria_monocytogenes_serotype_1_2a_str_99-6370_1196179 | Listeria_monocytogenes_1639_v67 | 0.9301 |
| Listeria_monocytogenes_serotype_1_2a_str_98-2035_1196178 | Listeria_monocytogenes_1639_v67 | 0.9301 |
| Listeria_monocytogenes_serotype_1_2a_str_95-0093_1196177 | Listeria_monocytogenes_1639_v67 | 0.9348 |
| Listeria_monocytogenes_serotype_1_2a_str_88-0478_1196176 | Listeria_monocytogenes_1639_v67 | 0.9352 |
| Listeria_monocytogenes_serotype_1_2a_str_10-5024_1196192 | Listeria_monocytogenes_1639_v67 | 0.9356 |
| Listeria_monocytogenes_serotype_1_2a_str_10-4758_1196168 | Listeria_monocytogenes_1639_v67 | 0.9413 |
| Listeria_monocytogenes_serotype_1_2a_str_10-4754_1196167 | Listeria_monocytogenes_1639_v67 | 0.9413 |
| Listeria_monocytogenes_serotype_1_2a_str_10-1321_1196191 | Listeria_monocytogenes_1639_v67 | 0.9356 |
| Listeria_monocytogenes_serotype_1_2a_str_10-1047_1196190 | Listeria_monocytogenes_1639_v67 | 0.9352 |
| Listeria_monocytogenes_serotype_1_2a_str_10-1046_1196189 | Listeria_monocytogenes_1639_v67 | 0.9352 |
| Listeria_monocytogenes_serotype_1_2a_str_10-0934_1196170 | Listeria_monocytogenes_1639_v67 | 0.9405 |
| Listeria_monocytogenes_serotype_1_2a_str_10-0933_1196169 | Listeria_monocytogenes_1639_v67 | 0.9405 |
| Listeria_monocytogenes_serotype_1_2a_str_10-0815_1196188 | Listeria_monocytogenes_1639_v67 | 0.9311 |
| Listeria_monocytogenes_serotype_1_2a_str_10-0814_1196187 | Listeria_monocytogenes_1639_v67 | 0.9356 |
| Listeria_monocytogenes_serotype_1_2a_str_10-0813_1196166 | Listeria_monocytogenes_1639_v67 | 0.9413 |
| Listeria_monocytogenes_serotype_1_2a_str_10-0812_1196165 | Listeria_monocytogenes_1639_v67 | 0.9413 |
| Listeria_monocytogenes_serotype_1_2a_str_08-7669_1196186 | Listeria_monocytogenes_1639_v67 | 0.9345 |
| Listeria_monocytogenes_serotype_1_2a_str_08-7374_1196185 | Listeria_monocytogenes_1639_v67 | 0.9356 |
| Listeria_monocytogenes_serotype_1_2a_str_08-6997_1196184 | Listeria_monocytogenes_1639_v67 | 0.9311 |
| Listeria_monocytogenes_serotype_1_2a_str_08-6569_1196183 | Listeria_monocytogenes_1639_v67 | 0.9311 |
| Listeria_monocytogenes_serotype_1_2a_str_08-6056_1196182 | Listeria_monocytogenes_1639_v67 | 0.9311 |
| Listeria_monocytogenes_serotype_1_2a_str_04-5457_1196181 | Listeria_monocytogenes_1639_v67 | 0.9356 |
| Listeria_monocytogenes_serotype_1_2a_str_02-5993_1196180 | Listeria_monocytogenes_1639_v67 | 0.9352 |
| Listeria_monocytogenes_R479a_1437838                     | Listeria_monocytogenes_1639_v67 | 0.9316 |
| Listeria_monocytogenes_N53-1_1234142                     | Listeria_monocytogenes_1639_v67 | 0.8906 |
| Listeria_monocytogenes_M7_1030009                        | Listeria_monocytogenes_1639_v67 | 0.9065 |
| Listeria_monocytogenes_LO28_393132                       | Listeria_monocytogenes_1639_v67 | 0.9416 |
| Listeria_monocytogenes_L99_563174                        | Listeria_monocytogenes_1639_v67 | 0.9071 |
| Listeria_monocytogenes_L312_882094                       | Listeria_monocytogenes_1639_v67 | 0.9494 |
| Listeria_monocytogenes_J1816_930781                      | Listeria_monocytogenes_1639_v67 | 0.9397 |
| Listeria_monocytogenes_J1-220_930782                     | Listeria_monocytogenes_1639_v67 | 0.9403 |
| Listeria_monocytogenes_J0161_393130                      | Listeria_monocytogenes_1639_v67 | 0.9415 |
| Listeria_monocytogenes_HCC23_552536                      | Listeria_monocytogenes_1639_v67 | 0.9064 |
| Listeria_monocytogenes_FSL_R2-561_393126                 | Listeria_monocytogenes_1639_v67 | 0.9423 |
| Listeria_monocytogenes_FSL_J1-208_393119                 | Listeria_monocytogenes_1639_v67 | 0.9046 |
| Listeria_monocytogenes_FSL_J1-175_393118                 | Listeria_monocytogenes_1639_v67 | 0.9781 |
| Listeria_monocytogenes_Finland_1998_393127               | Listeria_monocytogenes_1639_v67 | 0.9378 |
| Listeria_monocytogenes_EGD-e_169963_v1                   | Listeria_monocytogenes_1639_v67 | 0.9383 |
| Listeria_monocytogenes_EGD-e_169963                      | Listeria_monocytogenes_1639_v67 | 0.9387 |
| Listeria_monocytogenes_EGD_1334565                       | Listeria_monocytogenes_1639_v67 | 0.9419 |
| Listeria_monocytogenes_CFSAN002349_1299895               | Listeria_monocytogenes_1639_v67 | 0.9511 |
| Listeria_monocytogenes_ATCC_19117_882095_v1              | Listeria_monocytogenes_1639_v67 | 0.9455 |
| Listeria_monocytogenes_ATCC_19117_882095                 | Listeria_monocytogenes_1639_v67 | 0.9455 |
| Listeria_monocytogenes_6179_1288295                      | Listeria_monocytogenes_1639_v67 | 0.9336 |
| Listeria_monocytogenes_1639_v9                           | Listeria_monocytogenes_1639_v67 | 0.9663 |
| Listeria_monocytogenes_1639_v99                          | Listeria_monocytogenes_1639_v67 | 0.9398 |
| Listeria_monocytogenes_1639_v98                          | Listeria_monocytogenes_1639_v67 | 0.9329 |
| Listeria_monocytogenes_1639_v97                          | Listeria_monocytogenes_1639_v67 | 0.949  |
| Listeria_monocytogenes_1639_v96                          | Listeria_monocytogenes_1639_v67 | 0.9394 |
| Listeria_monocytogenes_1639_v95                          | Listeria_monocytogenes_1639_v67 | 0.9395 |
| Listeria_monocytogenes_1639_v94                          | Listeria_monocytogenes_1639_v67 | 0.9394 |
| Listeria_monocytogenes_1639_v93                          | Listeria_monocytogenes_1639_v67 | 0.9296 |
| Listeria_monocytogenes_1639_v92                          | Listeria_monocytogenes_1639_v67 | 0.9409 |
| Listeria_monocytogenes_1639_v91                          | Listeria_monocytogenes_1639_v67 | 0.9441 |
| Listeria_monocytogenes_1639_v90                          | Listeria_monocytogenes_1639_v67 | 0.9329 |
| Listeria_monocytogenes_1639_v8                           | Listeria_monocytogenes_1639_v67 | 0.9232 |

|                                                          |                                 |        |
|----------------------------------------------------------|---------------------------------|--------|
| Listeria_monocytogenes_1639_v89                          | Listeria_monocytogenes_1639_v67 | 0.9466 |
| Listeria_monocytogenes_1639_v88                          | Listeria_monocytogenes_1639_v67 | 0.9473 |
| Listeria_monocytogenes_1639_v87                          | Listeria_monocytogenes_1639_v67 | 0.9367 |
| Listeria_monocytogenes_1639_v86                          | Listeria_monocytogenes_1639_v67 | 0.9356 |
| Listeria_monocytogenes_1639_v85                          | Listeria_monocytogenes_1639_v67 | 0.9407 |
| Listeria_monocytogenes_1639_v84                          | Listeria_monocytogenes_1639_v67 | 0.9483 |
| Listeria_monocytogenes_1639_v83                          | Listeria_monocytogenes_1639_v67 | 0.9428 |
| Listeria_monocytogenes_1639_v82                          | Listeria_monocytogenes_1639_v67 | 0.9421 |
| Listeria_monocytogenes_1639_v81                          | Listeria_monocytogenes_1639_v67 | 0.9428 |
| Listeria_monocytogenes_1639_v80                          | Listeria_monocytogenes_1639_v67 | 0.9573 |
| Listeria_monocytogenes_1639_v7                           | Listeria_monocytogenes_1639_v67 | 0.9232 |
| Listeria_monocytogenes_1639_v79                          | Listeria_monocytogenes_1639_v67 | 0.9429 |
| Listeria_monocytogenes_1639_v78                          | Listeria_monocytogenes_1639_v67 | 0.9421 |
| Listeria_monocytogenes_1639_v77                          | Listeria_monocytogenes_1639_v67 | 0.9336 |
| Listeria_monocytogenes_1639_v76                          | Listeria_monocytogenes_1639_v67 | 0.9392 |
| Listeria_monocytogenes_1639_v75                          | Listeria_monocytogenes_1639_v67 | 0.9071 |
| Listeria_monocytogenes_1639_v74                          | Listeria_monocytogenes_1639_v67 | 0.923  |
| Listeria_monocytogenes_1639_v73                          | Listeria_monocytogenes_1639_v67 | 0.9319 |
| Listeria_monocytogenes_1639_v72                          | Listeria_monocytogenes_1639_v67 | 0.9401 |
| Listeria_monocytogenes_1639_v71                          | Listeria_monocytogenes_1639_v67 | 0.9283 |
| Listeria_monocytogenes_1639_v70                          | Listeria_monocytogenes_1639_v67 | 0.9428 |
| Listeria_monocytogenes_1639_v6                           | Listeria_monocytogenes_1639_v67 | 0.9225 |
| Listeria_monocytogenes_1639_v69                          | Listeria_monocytogenes_1639_v67 | 0.941  |
| Listeria_monocytogenes_1639_v68                          | Listeria_monocytogenes_1639_v67 | 0.9301 |
| Listeria_monocytogenes_1639_v67                          | Listeria_monocytogenes_1639_v67 | 0.0669 |
| Listeria_welshimeri_1643                                 | Listeria_monocytogenes_1639_v68 | 0.876  |
| Listeria_welshimeri_serovar_6b_str_SLCC5334_386043       | Listeria_monocytogenes_1639_v68 | 0.8753 |
| Listeria_seeligeri_serovar_1_2b_str_SLCC3954_683837      | Listeria_monocytogenes_1639_v68 | 0.8847 |
| Listeria_seeligeri_FSL_S4-171_702452                     | Listeria_monocytogenes_1639_v68 | 0.8167 |
| Listeria_seeligeri_FSL_N1-067_702453                     | Listeria_monocytogenes_1639_v68 | 0.8338 |
| Listeria_seeligeri_1640_v1                               | Listeria_monocytogenes_1639_v68 | 0.8823 |
| Listeria_seeligeri_1640                                  | Listeria_monocytogenes_1639_v68 | 0.8843 |
| Listeria_monocytogenes_WSLC1042_1457188                  | Listeria_monocytogenes_1639_v68 | 0.9363 |
| Listeria_monocytogenes_WSLC1001_1457187                  | Listeria_monocytogenes_1639_v68 | 0.9429 |
| Listeria_monocytogenes_SLCC7179_879090                   | Listeria_monocytogenes_1639_v68 | 0.9587 |
| Listeria_monocytogenes_SLCC5850_882096                   | Listeria_monocytogenes_1639_v68 | 0.9461 |
| Listeria_monocytogenes_SLCC2755_932919                   | Listeria_monocytogenes_1639_v68 | 0.9334 |
| Listeria_monocytogenes_SLCC2540_879089                   | Listeria_monocytogenes_1639_v68 | 0.9335 |
| Listeria_monocytogenes_SLCC2479_882020                   | Listeria_monocytogenes_1639_v68 | 0.9456 |
| Listeria_monocytogenes_SLCC2378_879088                   | Listeria_monocytogenes_1639_v68 | 0.9377 |
| Listeria_monocytogenes_SLCC2376_882097                   | Listeria_monocytogenes_1639_v68 | 0.9324 |
| Listeria_monocytogenes_SLCC2372_932920                   | Listeria_monocytogenes_1639_v68 | 0.939  |
| Listeria_monocytogenes_serotype_4b_str_LL195_1230340     | Listeria_monocytogenes_1639_v68 | 0.9335 |
| Listeria_monocytogenes_serotype_4b_str_LIS0087_1134669   | Listeria_monocytogenes_1639_v68 | 0.9315 |
| Listeria_monocytogenes_serotype_4b_str_F2365_265669      | Listeria_monocytogenes_1639_v68 | 0.9335 |
| Listeria_monocytogenes_serotype_4b_str_CLIP_80459_568819 | Listeria_monocytogenes_1639_v68 | 0.9399 |
| Listeria_monocytogenes_serotype_4b_str_81-0861_1196161   | Listeria_monocytogenes_1639_v68 | 0.938  |
| Listeria_monocytogenes_serotype_4b_str_81-0592_1196160   | Listeria_monocytogenes_1639_v68 | 0.9391 |
| Listeria_monocytogenes_serotype_4b_str_81-0558_1196159   | Listeria_monocytogenes_1639_v68 | 0.9398 |
| Listeria_monocytogenes_serotype_4b_str_10-0809_1196162   | Listeria_monocytogenes_1639_v68 | 0.9391 |
| Listeria_monocytogenes_serotype_4b_str_02-6680_1196175   | Listeria_monocytogenes_1639_v68 | 0.9362 |
| Listeria_monocytogenes_serotype_4b_str_02-6679_1196174   | Listeria_monocytogenes_1639_v68 | 0.9362 |
| Listeria_monocytogenes_serotype_4b_str_02-1792_1196173   | Listeria_monocytogenes_1639_v68 | 0.941  |
| Listeria_monocytogenes_serotype_4b_str_02-1289_1196172   | Listeria_monocytogenes_1639_v68 | 0.941  |
| Listeria_monocytogenes_serotype_4b_str_02-1103_1196171   | Listeria_monocytogenes_1639_v68 | 0.941  |
| Listeria_monocytogenes_serotype_3c_str_10-5027_1196195   | Listeria_monocytogenes_1639_v68 | 0.9448 |
| Listeria_monocytogenes_serotype_1_2c_str_10-5026_1196194 | Listeria_monocytogenes_1639_v68 | 0.9463 |
| Listeria_monocytogenes_serotype_1_2c_str_10-5025_1196193 | Listeria_monocytogenes_1639_v68 | 0.9463 |
| Listeria_monocytogenes_serotype_1_2b_str_10-0811_1196164 | Listeria_monocytogenes_1639_v68 | 0.9335 |
| Listeria_monocytogenes_serotype_1_2b_str_10-0810_1196163 | Listeria_monocytogenes_1639_v68 | 0.9335 |
| Listeria_monocytogenes_serotype_1_2a_str_99-6370_1196179 | Listeria_monocytogenes_1639_v68 | 0.9312 |
| Listeria_monocytogenes_serotype_1_2a_str_98-2035_1196178 | Listeria_monocytogenes_1639_v68 | 0.9312 |
| Listeria_monocytogenes_serotype_1_2a_str_95-0093_1196177 | Listeria_monocytogenes_1639_v68 | 0.9352 |
| Listeria_monocytogenes_serotype_1_2a_str_88-0478_1196176 | Listeria_monocytogenes_1639_v68 | 0.9351 |
| Listeria_monocytogenes_serotype_1_2a_str_10-5024_1196192 | Listeria_monocytogenes_1639_v68 | 0.9355 |
| Listeria_monocytogenes_serotype_1_2a_str_10-4758_1196168 | Listeria_monocytogenes_1639_v68 | 0.9488 |
| Listeria_monocytogenes_serotype_1_2a_str_10-4754_1196167 | Listeria_monocytogenes_1639_v68 | 0.9488 |
| Listeria_monocytogenes_serotype_1_2a_str_10-1321_1196191 | Listeria_monocytogenes_1639_v68 | 0.9355 |
| Listeria_monocytogenes_serotype_1_2a_str_10-1047_1196190 | Listeria_monocytogenes_1639_v68 | 0.9359 |
| Listeria_monocytogenes_serotype_1_2a_str_10-1046_1196189 | Listeria_monocytogenes_1639_v68 | 0.9359 |
| Listeria_monocytogenes_serotype_1_2a_str_10-0934_1196170 | Listeria_monocytogenes_1639_v68 | 0.9569 |
| Listeria_monocytogenes_serotype_1_2a_str_10-0933_1196169 | Listeria_monocytogenes_1639_v68 | 0.9569 |
| Listeria_monocytogenes_serotype_1_2a_str_10-0815_1196188 | Listeria_monocytogenes_1639_v68 | 0.9311 |
| Listeria_monocytogenes_serotype_1_2a_str_10-0814_1196187 | Listeria_monocytogenes_1639_v68 | 0.9356 |
| Listeria_monocytogenes_serotype_1_2a_str_10-0813_1196166 | Listeria_monocytogenes_1639_v68 | 0.951  |
| Listeria_monocytogenes_serotype_1_2a_str_10-0812_1196165 | Listeria_monocytogenes_1639_v68 | 0.951  |
| Listeria_monocytogenes_serotype_1_2a_str_08-7669_1196186 | Listeria_monocytogenes_1639_v68 | 0.9439 |
| Listeria_monocytogenes_serotype_1_2a_str_08-7374_1196185 | Listeria_monocytogenes_1639_v68 | 0.9355 |
| Listeria_monocytogenes_serotype_1_2a_str_08-6997_1196184 | Listeria_monocytogenes_1639_v68 | 0.9311 |
| Listeria_monocytogenes_serotype_1_2a_str_08-6569_1196183 | Listeria_monocytogenes_1639_v68 | 0.9311 |
| Listeria_monocytogenes_serotype_1_2a_str_08-6056_1196182 | Listeria_monocytogenes_1639_v68 | 0.9311 |
| Listeria_monocytogenes_serotype_1_2a_str_04-5457_1196181 | Listeria_monocytogenes_1639_v68 | 0.9355 |
| Listeria_monocytogenes_serotype_1_2a_str_02-5993_1196180 | Listeria_monocytogenes_1639_v68 | 0.9352 |
| Listeria_monocytogenes_R479a_1437838                     | Listeria_monocytogenes_1639_v68 | 0.9363 |
| Listeria_monocytogenes_N53-1_1234142                     | Listeria_monocytogenes_1639_v68 | 0.9091 |
| Listeria_monocytogenes_M7_1030009                        | Listeria_monocytogenes_1639_v68 | 0.9109 |
| Listeria_monocytogenes_LO28_393132                       | Listeria_monocytogenes_1639_v68 | 0.9516 |
| Listeria_monocytogenes_L99_563174                        | Listeria_monocytogenes_1639_v68 | 0.9115 |
| Listeria_monocytogenes_L312_882094                       | Listeria_monocytogenes_1639_v68 | 0.9399 |
| Listeria_monocytogenes_J1816_930781                      | Listeria_monocytogenes_1639_v68 | 0.923  |
| Listeria_monocytogenes_J1-220_930782                     | Listeria_monocytogenes_1639_v68 | 0.9344 |

|                                                          |                                 |        |
|----------------------------------------------------------|---------------------------------|--------|
| Listeria_monocytogenes_J0161_393130                      | Listeria_monocytogenes_1639_v68 | 0.9739 |
| Listeria_monocytogenes_HCC23_552536                      | Listeria_monocytogenes_1639_v68 | 0.9112 |
| Listeria_monocytogenes_FSL_R2-561_393126                 | Listeria_monocytogenes_1639_v68 | 0.9434 |
| Listeria_monocytogenes_FSL_J1-208_393119                 | Listeria_monocytogenes_1639_v68 | 0.9011 |
| Listeria_monocytogenes_FSL_J1-175_393118                 | Listeria_monocytogenes_1639_v68 | 0.9344 |
| Listeria_monocytogenes_Finland_1998_393127               | Listeria_monocytogenes_1639_v68 | 0.9599 |
| Listeria_monocytogenes_EGD-e_169963_v1                   | Listeria_monocytogenes_1639_v68 | 0.9601 |
| Listeria_monocytogenes_EGD-e_169963                      | Listeria_monocytogenes_1639_v68 | 0.9605 |
| Listeria_monocytogenes_EGD_1334565                       | Listeria_monocytogenes_1639_v68 | 0.9464 |
| Listeria_monocytogenes_CFSAN002349_1299895               | Listeria_monocytogenes_1639_v68 | 0.9359 |
| Listeria_monocytogenes_ATCC_19117_882095_v1              | Listeria_monocytogenes_1639_v68 | 0.9421 |
| Listeria_monocytogenes_ATCC_19117_882095                 | Listeria_monocytogenes_1639_v68 | 0.9421 |
| Listeria_monocytogenes_6179_1288295                      | Listeria_monocytogenes_1639_v68 | 0.946  |
| Listeria_monocytogenes_1639_v9                           | Listeria_monocytogenes_1639_v68 | 0.9187 |
| Listeria_monocytogenes_1639_v99                          | Listeria_monocytogenes_1639_v68 | 0.9234 |
| Listeria_monocytogenes_1639_v98                          | Listeria_monocytogenes_1639_v68 | 0.9504 |
| Listeria_monocytogenes_1639_v97                          | Listeria_monocytogenes_1639_v68 | 0.9303 |
| Listeria_monocytogenes_1639_v96                          | Listeria_monocytogenes_1639_v68 | 0.9238 |
| Listeria_monocytogenes_1639_v95                          | Listeria_monocytogenes_1639_v68 | 0.9238 |
| Listeria_monocytogenes_1639_v94                          | Listeria_monocytogenes_1639_v68 | 0.9242 |
| Listeria_monocytogenes_1639_v93                          | Listeria_monocytogenes_1639_v68 | 0.9374 |
| Listeria_monocytogenes_1639_v92                          | Listeria_monocytogenes_1639_v68 | 0.9234 |
| Listeria_monocytogenes_1639_v91                          | Listeria_monocytogenes_1639_v68 | 0.9273 |
| Listeria_monocytogenes_1639_v90                          | Listeria_monocytogenes_1639_v68 | 0.9504 |
| Listeria_monocytogenes_1639_v8                           | Listeria_monocytogenes_1639_v68 | 0.9264 |
| Listeria_monocytogenes_1639_v89                          | Listeria_monocytogenes_1639_v68 | 0.9405 |
| Listeria_monocytogenes_1639_v88                          | Listeria_monocytogenes_1639_v68 | 0.9443 |
| Listeria_monocytogenes_1639_v87                          | Listeria_monocytogenes_1639_v68 | 0.9456 |
| Listeria_monocytogenes_1639_v86                          | Listeria_monocytogenes_1639_v68 | 0.9453 |
| Listeria_monocytogenes_1639_v85                          | Listeria_monocytogenes_1639_v68 | 0.9385 |
| Listeria_monocytogenes_1639_v84                          | Listeria_monocytogenes_1639_v68 | 0.9468 |
| Listeria_monocytogenes_1639_v83                          | Listeria_monocytogenes_1639_v68 | 0.9428 |
| Listeria_monocytogenes_1639_v82                          | Listeria_monocytogenes_1639_v68 | 0.9421 |
| Listeria_monocytogenes_1639_v81                          | Listeria_monocytogenes_1639_v68 | 0.9495 |
| Listeria_monocytogenes_1639_v80                          | Listeria_monocytogenes_1639_v68 | 0.9359 |
| Listeria_monocytogenes_1639_v7                           | Listeria_monocytogenes_1639_v68 | 0.9264 |
| Listeria_monocytogenes_1639_v79                          | Listeria_monocytogenes_1639_v68 | 0.947  |
| Listeria_monocytogenes_1639_v78                          | Listeria_monocytogenes_1639_v68 | 0.9481 |
| Listeria_monocytogenes_1639_v77                          | Listeria_monocytogenes_1639_v68 | 0.9486 |
| Listeria_monocytogenes_1639_v76                          | Listeria_monocytogenes_1639_v68 | 0.9392 |
| Listeria_monocytogenes_1639_v75                          | Listeria_monocytogenes_1639_v68 | 0.9115 |
| Listeria_monocytogenes_1639_v74                          | Listeria_monocytogenes_1639_v68 | 0.9468 |
| Listeria_monocytogenes_1639_v73                          | Listeria_monocytogenes_1639_v68 | 0.9456 |
| Listeria_monocytogenes_1639_v72                          | Listeria_monocytogenes_1639_v68 | 0.939  |
| Listeria_monocytogenes_1639_v71                          | Listeria_monocytogenes_1639_v68 | 0.9339 |
| Listeria_monocytogenes_1639_v70                          | Listeria_monocytogenes_1639_v68 | 0.9413 |
| Listeria_monocytogenes_1639_v6                           | Listeria_monocytogenes_1639_v68 | 0.9257 |
| Listeria_monocytogenes_1639_v69                          | Listeria_monocytogenes_1639_v68 | 0.9395 |
| Listeria_monocytogenes_1639_v68                          | Listeria_monocytogenes_1639_v68 | 0.0696 |
| Listeria_welshimeri_1643                                 | Listeria_monocytogenes_1639_v69 | 0.8807 |
| Listeria_welshimeri_serovar_6b_str_SLCC5334_386043       | Listeria_monocytogenes_1639_v69 | 0.88   |
| Listeria_seeligeri_serovar_1_2b_str_SLCC3954_683837      | Listeria_monocytogenes_1639_v69 | 0.874  |
| Listeria_seeligeri_FSL_S4-171_702452                     | Listeria_monocytogenes_1639_v69 | 0.822  |
| Listeria_seeligeri_FSL_N1-067_702453                     | Listeria_monocytogenes_1639_v69 | 0.8257 |
| Listeria_seeligeri_1640_v1                               | Listeria_monocytogenes_1639_v69 | 0.8847 |
| Listeria_seeligeri_1640                                  | Listeria_monocytogenes_1639_v69 | 0.8821 |
| Listeria_monocytogenes_WSLC1042_1457188                  | Listeria_monocytogenes_1639_v69 | 0.9861 |
| Listeria_monocytogenes_WSLC1001_1457187                  | Listeria_monocytogenes_1639_v69 | 0.9194 |
| Listeria_monocytogenes_SLCC7179_879090                   | Listeria_monocytogenes_1639_v69 | 0.9364 |
| Listeria_monocytogenes_SLCC5850_882096                   | Listeria_monocytogenes_1639_v69 | 0.9231 |
| Listeria_monocytogenes_SLCC2755_932919                   | Listeria_monocytogenes_1639_v69 | 0.9357 |
| Listeria_monocytogenes_SLCC2540_879089                   | Listeria_monocytogenes_1639_v69 | 0.943  |
| Listeria_monocytogenes_SLCC2479_882020                   | Listeria_monocytogenes_1639_v69 | 0.9222 |
| Listeria_monocytogenes_SLCC2378_879088                   | Listeria_monocytogenes_1639_v69 | 0.9876 |
| Listeria_monocytogenes_SLCC2376_882097                   | Listeria_monocytogenes_1639_v69 | 0.9305 |
| Listeria_monocytogenes_SLCC2372_932920                   | Listeria_monocytogenes_1639_v69 | 0.915  |
| Listeria_monocytogenes_serotype_4b_str_LL195_1230340     | Listeria_monocytogenes_1639_v69 | 0.9822 |
| Listeria_monocytogenes_serotype_4b_str_LIS0087_1134669   | Listeria_monocytogenes_1639_v69 | 0.9095 |
| Listeria_monocytogenes_serotype_4b_str_F2365_265669      | Listeria_monocytogenes_1639_v69 | 0.9822 |
| Listeria_monocytogenes_serotype_4b_str_CLIP_80459_568819 | Listeria_monocytogenes_1639_v69 | 0.9624 |
| Listeria_monocytogenes_serotype_4b_str_81-0861_1196161   | Listeria_monocytogenes_1639_v69 | 0.9981 |
| Listeria_monocytogenes_serotype_4b_str_81-0592_1196160   | Listeria_monocytogenes_1639_v69 | 0.9993 |
| Listeria_monocytogenes_serotype_4b_str_81-0558_1196159   | Listeria_monocytogenes_1639_v69 | 0.9985 |
| Listeria_monocytogenes_serotype_4b_str_10-0809_1196162   | Listeria_monocytogenes_1639_v69 | 0.9993 |
| Listeria_monocytogenes_serotype_4b_str_02-6680_1196175   | Listeria_monocytogenes_1639_v69 | 0.9625 |
| Listeria_monocytogenes_serotype_4b_str_02-6679_1196174   | Listeria_monocytogenes_1639_v69 | 0.9625 |
| Listeria_monocytogenes_serotype_4b_str_02-1792_1196173   | Listeria_monocytogenes_1639_v69 | 0.9925 |
| Listeria_monocytogenes_serotype_4b_str_02-1289_1196172   | Listeria_monocytogenes_1639_v69 | 0.9925 |
| Listeria_monocytogenes_serotype_4b_str_02-1103_1196171   | Listeria_monocytogenes_1639_v69 | 0.9925 |
| Listeria_monocytogenes_serotype_3c_str_10-5027_1196195   | Listeria_monocytogenes_1639_v69 | 0.9221 |
| Listeria_monocytogenes_serotype_1_2c_str_10-5026_1196194 | Listeria_monocytogenes_1639_v69 | 0.9236 |
| Listeria_monocytogenes_serotype_1_2c_str_10-5025_1196193 | Listeria_monocytogenes_1639_v69 | 0.9236 |
| Listeria_monocytogenes_serotype_1_2b_str_10-0811_1196164 | Listeria_monocytogenes_1639_v69 | 0.944  |
| Listeria_monocytogenes_serotype_1_2b_str_10-0810_1196163 | Listeria_monocytogenes_1639_v69 | 0.944  |
| Listeria_monocytogenes_serotype_1_2a_str_99-6370_1196179 | Listeria_monocytogenes_1639_v69 | 0.9099 |
| Listeria_monocytogenes_serotype_1_2a_str_98-2035_1196178 | Listeria_monocytogenes_1639_v69 | 0.9099 |
| Listeria_monocytogenes_serotype_1_2a_str_95-0093_1196177 | Listeria_monocytogenes_1639_v69 | 0.9145 |
| Listeria_monocytogenes_serotype_1_2a_str_88-0478_1196176 | Listeria_monocytogenes_1639_v69 | 0.9148 |
| Listeria_monocytogenes_serotype_1_2a_str_10-5024_1196192 | Listeria_monocytogenes_1639_v69 | 0.9149 |
| Listeria_monocytogenes_serotype_1_2a_str_10-4758_1196168 | Listeria_monocytogenes_1639_v69 | 0.9278 |
| Listeria_monocytogenes_serotype_1_2a_str_10-4754_1196167 | Listeria_monocytogenes_1639_v69 | 0.9278 |

|                                                          |                                 |        |
|----------------------------------------------------------|---------------------------------|--------|
| Listeria_monocytogenes_serotype_1_2a_str_10-1321_1196191 | Listeria_monocytogenes_1639_v69 | 0.9149 |
| Listeria_monocytogenes_serotype_1_2a_str_10-1047_1196190 | Listeria_monocytogenes_1639_v69 | 0.9156 |
| Listeria_monocytogenes_serotype_1_2a_str_10-1046_1196189 | Listeria_monocytogenes_1639_v69 | 0.9156 |
| Listeria_monocytogenes_serotype_1_2a_str_10-0934_1196170 | Listeria_monocytogenes_1639_v69 | 0.9333 |
| Listeria_monocytogenes_serotype_1_2a_str_10-0933_1196169 | Listeria_monocytogenes_1639_v69 | 0.9333 |
| Listeria_monocytogenes_serotype_1_2a_str_10-0815_1196188 | Listeria_monocytogenes_1639_v69 | 0.9109 |
| Listeria_monocytogenes_serotype_1_2a_str_10-0814_1196187 | Listeria_monocytogenes_1639_v69 | 0.9149 |
| Listeria_monocytogenes_serotype_1_2a_str_10-0813_1196166 | Listeria_monocytogenes_1639_v69 | 0.9286 |
| Listeria_monocytogenes_serotype_1_2a_str_10-0812_1196165 | Listeria_monocytogenes_1639_v69 | 0.9286 |
| Listeria_monocytogenes_serotype_1_2a_str_08-7669_1196186 | Listeria_monocytogenes_1639_v69 | 0.9234 |
| Listeria_monocytogenes_serotype_1_2a_str_08-7374_1196185 | Listeria_monocytogenes_1639_v69 | 0.9149 |
| Listeria_monocytogenes_serotype_1_2a_str_08-6997_1196184 | Listeria_monocytogenes_1639_v69 | 0.9109 |
| Listeria_monocytogenes_serotype_1_2a_str_08-6569_1196183 | Listeria_monocytogenes_1639_v69 | 0.9109 |
| Listeria_monocytogenes_serotype_1_2a_str_08-6056_1196182 | Listeria_monocytogenes_1639_v69 | 0.9109 |
| Listeria_monocytogenes_serotype_1_2a_str_04-5457_1196181 | Listeria_monocytogenes_1639_v69 | 0.9149 |
| Listeria_monocytogenes_serotype_1_2a_str_02-5993_1196180 | Listeria_monocytogenes_1639_v69 | 0.9145 |
| Listeria_monocytogenes_R479a_1437838                     | Listeria_monocytogenes_1639_v69 | 0.9131 |
| Listeria_monocytogenes_N53-1_1234142                     | Listeria_monocytogenes_1639_v69 | 0.8888 |
| Listeria_monocytogenes_M7_1030009                        | Listeria_monocytogenes_1639_v69 | 0.9099 |
| Listeria_monocytogenes_LO28_393132                       | Listeria_monocytogenes_1639_v69 | 0.9282 |
| Listeria_monocytogenes_L99_563174                        | Listeria_monocytogenes_1639_v69 | 0.9105 |
| Listeria_monocytogenes_L312_882094                       | Listeria_monocytogenes_1639_v69 | 0.9628 |
| Listeria_monocytogenes_J1816_930781                      | Listeria_monocytogenes_1639_v69 | 0.9483 |
| Listeria_monocytogenes_J1-220_930782                     | Listeria_monocytogenes_1639_v69 | 0.9685 |
| Listeria_monocytogenes_J0161_393130                      | Listeria_monocytogenes_1639_v69 | 0.9289 |
| Listeria_monocytogenes_HCC23_552536                      | Listeria_monocytogenes_1639_v69 | 0.9098 |
| Listeria_monocytogenes_FSL_R2-561_393126                 | Listeria_monocytogenes_1639_v69 | 0.92   |
| Listeria_monocytogenes_FSL_J1-208_393119                 | Listeria_monocytogenes_1639_v69 | 0.9107 |
| Listeria_monocytogenes_FSL_J1-175_393118                 | Listeria_monocytogenes_1639_v69 | 0.9458 |
| Listeria_monocytogenes_Finland_1998_393127               | Listeria_monocytogenes_1639_v69 | 0.9325 |
| Listeria_monocytogenes_EGD-e_169963_v1                   | Listeria_monocytogenes_1639_v69 | 0.9384 |
| Listeria_monocytogenes_EGD-e_169963                      | Listeria_monocytogenes_1639_v69 | 0.9388 |
| Listeria_monocytogenes_EGD_1334565                       | Listeria_monocytogenes_1639_v69 | 0.9239 |
| Listeria_monocytogenes_CFSAN002349_1299895               | Listeria_monocytogenes_1639_v69 | 0.9629 |
| Listeria_monocytogenes_ATCC_19117_882095_v1              | Listeria_monocytogenes_1639_v69 | 0.972  |
| Listeria_monocytogenes_ATCC_19117_882095                 | Listeria_monocytogenes_1639_v69 | 0.972  |
| Listeria_monocytogenes_6179_1288295                      | Listeria_monocytogenes_1639_v69 | 0.9142 |
| Listeria_monocytogenes_1639_v9                           | Listeria_monocytogenes_1639_v69 | 0.9272 |
| Listeria_monocytogenes_1639_v99                          | Listeria_monocytogenes_1639_v69 | 0.9487 |
| Listeria_monocytogenes_1639_v98                          | Listeria_monocytogenes_1639_v69 | 0.9236 |
| Listeria_monocytogenes_1639_v97                          | Listeria_monocytogenes_1639_v69 | 0.9614 |
| Listeria_monocytogenes_1639_v96                          | Listeria_monocytogenes_1639_v69 | 0.9488 |
| Listeria_monocytogenes_1639_v95                          | Listeria_monocytogenes_1639_v69 | 0.9488 |
| Listeria_monocytogenes_1639_v94                          | Listeria_monocytogenes_1639_v69 | 0.9488 |
| Listeria_monocytogenes_1639_v93                          | Listeria_monocytogenes_1639_v69 | 0.9156 |
| Listeria_monocytogenes_1639_v92                          | Listeria_monocytogenes_1639_v69 | 0.9495 |
| Listeria_monocytogenes_1639_v91                          | Listeria_monocytogenes_1639_v69 | 0.9795 |
| Listeria_monocytogenes_1639_v90                          | Listeria_monocytogenes_1639_v69 | 0.9236 |
| Listeria_monocytogenes_1639_v8                           | Listeria_monocytogenes_1639_v69 | 0.9057 |
| Listeria_monocytogenes_1639_v89                          | Listeria_monocytogenes_1639_v69 | 0.9628 |
| Listeria_monocytogenes_1639_v88                          | Listeria_monocytogenes_1639_v69 | 0.9208 |
| Listeria_monocytogenes_1639_v87                          | Listeria_monocytogenes_1639_v69 | 0.9241 |
| Listeria_monocytogenes_1639_v86                          | Listeria_monocytogenes_1639_v69 | 0.9234 |
| Listeria_monocytogenes_1639_v85                          | Listeria_monocytogenes_1639_v69 | 0.9926 |
| Listeria_monocytogenes_1639_v84                          | Listeria_monocytogenes_1639_v69 | 0.9244 |
| Listeria_monocytogenes_1639_v83                          | Listeria_monocytogenes_1639_v69 | 0.9768 |
| Listeria_monocytogenes_1639_v82                          | Listeria_monocytogenes_1639_v69 | 0.9761 |
| Listeria_monocytogenes_1639_v81                          | Listeria_monocytogenes_1639_v69 | 0.9204 |
| Listeria_monocytogenes_1639_v80                          | Listeria_monocytogenes_1639_v69 | 0.9453 |
| Listeria_monocytogenes_1639_v7                           | Listeria_monocytogenes_1639_v69 | 0.9057 |
| Listeria_monocytogenes_1639_v79                          | Listeria_monocytogenes_1639_v69 | 0.9187 |
| Listeria_monocytogenes_1639_v78                          | Listeria_monocytogenes_1639_v69 | 0.9201 |
| Listeria_monocytogenes_1639_v77                          | Listeria_monocytogenes_1639_v69 | 0.9258 |
| Listeria_monocytogenes_1639_v76                          | Listeria_monocytogenes_1639_v69 | 0.9159 |
| Listeria_monocytogenes_1639_v75                          | Listeria_monocytogenes_1639_v69 | 0.9105 |
| Listeria_monocytogenes_1639_v74                          | Listeria_monocytogenes_1639_v69 | 0.9193 |
| Listeria_monocytogenes_1639_v73                          | Listeria_monocytogenes_1639_v69 | 0.9234 |
| Listeria_monocytogenes_1639_v72                          | Listeria_monocytogenes_1639_v69 | 0.9734 |
| Listeria_monocytogenes_1639_v71                          | Listeria_monocytogenes_1639_v69 | 0.904  |
| Listeria_monocytogenes_1639_v70                          | Listeria_monocytogenes_1639_v69 | 0.9206 |
| Listeria_monocytogenes_1639_v6                           | Listeria_monocytogenes_1639_v69 | 0.905  |
| Listeria_monocytogenes_1639_v69                          | Listeria_monocytogenes_1639_v69 | 0.0664 |
| Listeria_welshimeri_1643                                 | Listeria_monocytogenes_1639_v6  | 0.8543 |
| Listeria_welshimeri_serovar_6b_str_SLCC5334_386043       | Listeria_monocytogenes_1639_v6  | 0.854  |
| Listeria_seeligeri_serovar_1_2b_str_SLCC3954_683837      | Listeria_monocytogenes_1639_v6  | 0.8587 |
| Listeria_seeligeri_FSL_S4-171_702452                     | Listeria_monocytogenes_1639_v6  | 0.8027 |
| Listeria_seeligeri_FSL_N1-067_702453                     | Listeria_monocytogenes_1639_v6  | 0.8309 |
| Listeria_seeligeri_1640_v1                               | Listeria_monocytogenes_1639_v6  | 0.8615 |
| Listeria_seeligeri_1640                                  | Listeria_monocytogenes_1639_v6  | 0.853  |
| Listeria_monocytogenes_WSLC1042_1457188                  | Listeria_monocytogenes_1639_v6  | 0.9064 |
| Listeria_monocytogenes_WSLC1001_1457187                  | Listeria_monocytogenes_1639_v6  | 0.9376 |
| Listeria_monocytogenes_SLCC7179_879090                   | Listeria_monocytogenes_1639_v6  | 0.9344 |
| Listeria_monocytogenes_SLCC5850_882096                   | Listeria_monocytogenes_1639_v6  | 0.9384 |
| Listeria_monocytogenes_SLCC2755_932919                   | Listeria_monocytogenes_1639_v6  | 0.9338 |
| Listeria_monocytogenes_SLCC2540_879089                   | Listeria_monocytogenes_1639_v6  | 0.9199 |
| Listeria_monocytogenes_SLCC2479_882020                   | Listeria_monocytogenes_1639_v6  | 0.9398 |
| Listeria_monocytogenes_SLCC2378_879088                   | Listeria_monocytogenes_1639_v6  | 0.9074 |
| Listeria_monocytogenes_SLCC2376_882097                   | Listeria_monocytogenes_1639_v6  | 0.9099 |
| Listeria_monocytogenes_SLCC2372_932920                   | Listeria_monocytogenes_1639_v6  | 0.9421 |
| Listeria_monocytogenes_serotype_4b_str_LL195_1230340     | Listeria_monocytogenes_1639_v6  | 0.9109 |
| Listeria_monocytogenes_serotype_4b_str_LIS0087_1134669   | Listeria_monocytogenes_1639_v6  | 0.9189 |

|                                                          |                                |        |
|----------------------------------------------------------|--------------------------------|--------|
| Listeria_monocytogenes_serotype_4b_str_F2365_265669      | Listeria_monocytogenes_1639_v6 | 0.9109 |
| Listeria_monocytogenes_serotype_4b_str_CLIP_80459_568819 | Listeria_monocytogenes_1639_v6 | 0.9175 |
| Listeria_monocytogenes_serotype_4b_str_81-0861_1196161   | Listeria_monocytogenes_1639_v6 | 0.904  |
| Listeria_monocytogenes_serotype_4b_str_81-0592_1196160   | Listeria_monocytogenes_1639_v6 | 0.905  |
| Listeria_monocytogenes_serotype_4b_str_81-0558_1196159   | Listeria_monocytogenes_1639_v6 | 0.9053 |
| Listeria_monocytogenes_serotype_4b_str_10-0809_1196162   | Listeria_monocytogenes_1639_v6 | 0.905  |
| Listeria_monocytogenes_serotype_4b_str_02-6680_1196175   | Listeria_monocytogenes_1639_v6 | 0.9147 |
| Listeria_monocytogenes_serotype_4b_str_02-6679_1196174   | Listeria_monocytogenes_1639_v6 | 0.9147 |
| Listeria_monocytogenes_serotype_4b_str_02-1792_1196173   | Listeria_monocytogenes_1639_v6 | 0.9065 |
| Listeria_monocytogenes_serotype_4b_str_02-1289_1196172   | Listeria_monocytogenes_1639_v6 | 0.9065 |
| Listeria_monocytogenes_serotype_4b_str_02-1103_1196171   | Listeria_monocytogenes_1639_v6 | 0.9065 |
| Listeria_monocytogenes_serotype_3c_str_10-5027_1196195   | Listeria_monocytogenes_1639_v6 | 0.9427 |
| Listeria_monocytogenes_serotype_1_2c_str_10-5026_1196194 | Listeria_monocytogenes_1639_v6 | 0.9438 |
| Listeria_monocytogenes_serotype_1_2c_str_10-5025_1196193 | Listeria_monocytogenes_1639_v6 | 0.9438 |
| Listeria_monocytogenes_serotype_1_2b_str_10-0811_1196164 | Listeria_monocytogenes_1639_v6 | 0.9237 |
| Listeria_monocytogenes_serotype_1_2b_str_10-0810_1196163 | Listeria_monocytogenes_1639_v6 | 0.9237 |
| Listeria_monocytogenes_serotype_1_2a_str_99-6370_1196179 | Listeria_monocytogenes_1639_v6 | 0.9521 |
| Listeria_monocytogenes_serotype_1_2a_str_98-2035_1196178 | Listeria_monocytogenes_1639_v6 | 0.9521 |
| Listeria_monocytogenes_serotype_1_2a_str_95-0093_1196177 | Listeria_monocytogenes_1639_v6 | 0.9565 |
| Listeria_monocytogenes_serotype_1_2a_str_88-0478_1196176 | Listeria_monocytogenes_1639_v6 | 0.9565 |
| Listeria_monocytogenes_serotype_1_2a_str_10-5024_1196192 | Listeria_monocytogenes_1639_v6 | 0.9565 |
| Listeria_monocytogenes_serotype_1_2a_str_10-4758_1196168 | Listeria_monocytogenes_1639_v6 | 0.937  |
| Listeria_monocytogenes_serotype_1_2a_str_10-4754_1196167 | Listeria_monocytogenes_1639_v6 | 0.9374 |
| Listeria_monocytogenes_serotype_1_2a_str_10-1321_1196191 | Listeria_monocytogenes_1639_v6 | 0.9565 |
| Listeria_monocytogenes_serotype_1_2a_str_10-1047_1196190 | Listeria_monocytogenes_1639_v6 | 0.9587 |
| Listeria_monocytogenes_serotype_1_2a_str_10-1046_1196189 | Listeria_monocytogenes_1639_v6 | 0.9587 |
| Listeria_monocytogenes_serotype_1_2a_str_10-0934_1196170 | Listeria_monocytogenes_1639_v6 | 0.9373 |
| Listeria_monocytogenes_serotype_1_2a_str_10-0933_1196169 | Listeria_monocytogenes_1639_v6 | 0.9373 |
| Listeria_monocytogenes_serotype_1_2a_str_10-0815_1196188 | Listeria_monocytogenes_1639_v6 | 0.9524 |
| Listeria_monocytogenes_serotype_1_2a_str_10-0814_1196187 | Listeria_monocytogenes_1639_v6 | 0.9565 |
| Listeria_monocytogenes_serotype_1_2a_str_10-0813_1196166 | Listeria_monocytogenes_1639_v6 | 0.9444 |
| Listeria_monocytogenes_serotype_1_2a_str_10-0812_1196165 | Listeria_monocytogenes_1639_v6 | 0.9444 |
| Listeria_monocytogenes_serotype_1_2a_str_08-7669_1196186 | Listeria_monocytogenes_1639_v6 | 0.952  |
| Listeria_monocytogenes_serotype_1_2a_str_08-7374_1196185 | Listeria_monocytogenes_1639_v6 | 0.9565 |
| Listeria_monocytogenes_serotype_1_2a_str_08-6997_1196184 | Listeria_monocytogenes_1639_v6 | 0.9524 |
| Listeria_monocytogenes_serotype_1_2a_str_08-6569_1196183 | Listeria_monocytogenes_1639_v6 | 0.9524 |
| Listeria_monocytogenes_serotype_1_2a_str_08-6056_1196182 | Listeria_monocytogenes_1639_v6 | 0.9524 |
| Listeria_monocytogenes_serotype_1_2a_str_04-5457_1196181 | Listeria_monocytogenes_1639_v6 | 0.9565 |
| Listeria_monocytogenes_serotype_1_2a_str_02-5993_1196180 | Listeria_monocytogenes_1639_v6 | 0.9565 |
| Listeria_monocytogenes_R479a_1437838                     | Listeria_monocytogenes_1639_v6 | 0.975  |
| Listeria_monocytogenes_N53-1_1234142                     | Listeria_monocytogenes_1639_v6 | 0.8819 |
| Listeria_monocytogenes_M7_1030009                        | Listeria_monocytogenes_1639_v6 | 0.89   |
| Listeria_monocytogenes_LO28_393132                       | Listeria_monocytogenes_1639_v6 | 0.9345 |
| Listeria_monocytogenes_L99_563174                        | Listeria_monocytogenes_1639_v6 | 0.8903 |
| Listeria_monocytogenes_L312_882094                       | Listeria_monocytogenes_1639_v6 | 0.9175 |
| Listeria_monocytogenes_J1816_930781                      | Listeria_monocytogenes_1639_v6 | 0.9098 |
| Listeria_monocytogenes_J1-220_930782                     | Listeria_monocytogenes_1639_v6 | 0.9094 |
| Listeria_monocytogenes_J0161_393130                      | Listeria_monocytogenes_1639_v6 | 0.9301 |
| Listeria_monocytogenes_HCC23_552536                      | Listeria_monocytogenes_1639_v6 | 0.8897 |
| Listeria_monocytogenes_FSL_R2-561_393126                 | Listeria_monocytogenes_1639_v6 | 0.9403 |
| Listeria_monocytogenes_FSL_J1-208_393119                 | Listeria_monocytogenes_1639_v6 | 0.8771 |
| Listeria_monocytogenes_FSL_J1-175_393118                 | Listeria_monocytogenes_1639_v6 | 0.9204 |
| Listeria_monocytogenes_Finland_1998_393127               | Listeria_monocytogenes_1639_v6 | 0.9377 |
| Listeria_monocytogenes_EGD-e_169963_v1                   | Listeria_monocytogenes_1639_v6 | 0.9309 |
| Listeria_monocytogenes_EGD-e_169963                      | Listeria_monocytogenes_1639_v6 | 0.9309 |
| Listeria_monocytogenes_EGD_1334565                       | Listeria_monocytogenes_1639_v6 | 0.9391 |
| Listeria_monocytogenes_CFSAN002349_1299895               | Listeria_monocytogenes_1639_v6 | 0.9151 |
| Listeria_monocytogenes_ATCC_19117_882095_v1              | Listeria_monocytogenes_1639_v6 | 0.9123 |
| Listeria_monocytogenes_ATCC_19117_882095                 | Listeria_monocytogenes_1639_v6 | 0.9119 |
| Listeria_monocytogenes_6179_1288295                      | Listeria_monocytogenes_1639_v6 | 0.9458 |
| Listeria_monocytogenes_1639_v9                           | Listeria_monocytogenes_1639_v6 | 0.9058 |
| Listeria_monocytogenes_1639_v99                          | Listeria_monocytogenes_1639_v6 | 0.9163 |
| Listeria_monocytogenes_1639_v98                          | Listeria_monocytogenes_1639_v6 | 0.926  |
| Listeria_monocytogenes_1639_v97                          | Listeria_monocytogenes_1639_v6 | 0.9127 |
| Listeria_monocytogenes_1639_v96                          | Listeria_monocytogenes_1639_v6 | 0.9157 |
| Listeria_monocytogenes_1639_v95                          | Listeria_monocytogenes_1639_v6 | 0.9157 |
| Listeria_monocytogenes_1639_v94                          | Listeria_monocytogenes_1639_v6 | 0.9164 |
| Listeria_monocytogenes_1639_v93                          | Listeria_monocytogenes_1639_v6 | 0.9402 |
| Listeria_monocytogenes_1639_v92                          | Listeria_monocytogenes_1639_v6 | 0.916  |
| Listeria_monocytogenes_1639_v91                          | Listeria_monocytogenes_1639_v6 | 0.9086 |
| Listeria_monocytogenes_1639_v90                          | Listeria_monocytogenes_1639_v6 | 0.926  |
| Listeria_monocytogenes_1639_v8                           | Listeria_monocytogenes_1639_v6 | 0.9993 |
| Listeria_monocytogenes_1639_v89                          | Listeria_monocytogenes_1639_v6 | 0.9135 |
| Listeria_monocytogenes_1639_v88                          | Listeria_monocytogenes_1639_v6 | 0.9433 |
| Listeria_monocytogenes_1639_v87                          | Listeria_monocytogenes_1639_v6 | 0.9348 |
| Listeria_monocytogenes_1639_v86                          | Listeria_monocytogenes_1639_v6 | 0.9348 |
| Listeria_monocytogenes_1639_v85                          | Listeria_monocytogenes_1639_v6 | 0.9044 |
| Listeria_monocytogenes_1639_v84                          | Listeria_monocytogenes_1639_v6 | 0.9425 |
| Listeria_monocytogenes_1639_v83                          | Listeria_monocytogenes_1639_v6 | 0.9071 |
| Listeria_monocytogenes_1639_v82                          | Listeria_monocytogenes_1639_v6 | 0.9068 |
| Listeria_monocytogenes_1639_v81                          | Listeria_monocytogenes_1639_v6 | 0.9463 |
| Listeria_monocytogenes_1639_v80                          | Listeria_monocytogenes_1639_v6 | 0.9234 |
| Listeria_monocytogenes_1639_v7                           | Listeria_monocytogenes_1639_v6 | 0.9993 |
| Listeria_monocytogenes_1639_v79                          | Listeria_monocytogenes_1639_v6 | 0.9412 |
| Listeria_monocytogenes_1639_v78                          | Listeria_monocytogenes_1639_v6 | 0.9456 |
| Listeria_monocytogenes_1639_v77                          | Listeria_monocytogenes_1639_v6 | 0.9329 |
| Listeria_monocytogenes_1639_v76                          | Listeria_monocytogenes_1639_v6 | 0.9325 |
| Listeria_monocytogenes_1639_v75                          | Listeria_monocytogenes_1639_v6 | 0.8903 |
| Listeria_monocytogenes_1639_v74                          | Listeria_monocytogenes_1639_v6 | 0.9283 |
| Listeria_monocytogenes_1639_v73                          | Listeria_monocytogenes_1639_v6 | 0.9399 |
| Listeria_monocytogenes_1639_v72                          | Listeria_monocytogenes_1639_v6 | 0.9059 |

|                                                          |                                 |        |
|----------------------------------------------------------|---------------------------------|--------|
| Listeria_monocytogenes_1639_v71                          | Listeria_monocytogenes_1639_v6  | 0.9309 |
| Listeria_monocytogenes_1639_v70                          | Listeria_monocytogenes_1639_v6  | 0.9412 |
| Listeria_monocytogenes_1639_v6                           | Listeria_monocytogenes_1639_v6  | 0.0698 |
| Listeria_welshimeri_1643                                 | Listeria_monocytogenes_1639_v70 | 0.8667 |
| Listeria_welshimeri_serovar_6b_str_SLCC5334_386043       | Listeria_monocytogenes_1639_v70 | 0.866  |
| Listeria_seeligeri_serovar_1_2b_str_SLCC3954_683837      | Listeria_monocytogenes_1639_v70 | 0.8721 |
| Listeria_seeligeri_FSL_S4-171_702452                     | Listeria_monocytogenes_1639_v70 | 0.8157 |
| Listeria_seeligeri_FSL_N1-067_702453                     | Listeria_monocytogenes_1639_v70 | 0.8369 |
| Listeria_seeligeri_1640_v1                               | Listeria_monocytogenes_1639_v70 | 0.8756 |
| Listeria_seeligeri_1640                                  | Listeria_monocytogenes_1639_v70 | 0.8694 |
| Listeria_monocytogenes_WSLC1042_1457188                  | Listeria_monocytogenes_1639_v70 | 0.9218 |
| Listeria_monocytogenes_WSLC1001_1457187                  | Listeria_monocytogenes_1639_v70 | 0.956  |
| Listeria_monocytogenes_SLCC7179_879090                   | Listeria_monocytogenes_1639_v70 | 0.9462 |
| Listeria_monocytogenes_SLCC5850_882096                   | Listeria_monocytogenes_1639_v70 | 0.9524 |
| Listeria_monocytogenes_SLCC2755_932919                   | Listeria_monocytogenes_1639_v70 | 0.9231 |
| Listeria_monocytogenes_SLCC2540_879089                   | Listeria_monocytogenes_1639_v70 | 0.9411 |
| Listeria_monocytogenes_SLCC2479_882020                   | Listeria_monocytogenes_1639_v70 | 0.9867 |
| Listeria_monocytogenes_SLCC2378_879088                   | Listeria_monocytogenes_1639_v70 | 0.9232 |
| Listeria_monocytogenes_SLCC2376_882097                   | Listeria_monocytogenes_1639_v70 | 0.9287 |
| Listeria_monocytogenes_SLCC2372_932920                   | Listeria_monocytogenes_1639_v70 | 0.9831 |
| Listeria_monocytogenes_serotype_4b_str_LL195_1230340     | Listeria_monocytogenes_1639_v70 | 0.9276 |
| Listeria_monocytogenes_serotype_4b_str_LIS0087_1134669   | Listeria_monocytogenes_1639_v70 | 0.9312 |
| Listeria_monocytogenes_serotype_4b_str_F2365_265669      | Listeria_monocytogenes_1639_v70 | 0.9276 |
| Listeria_monocytogenes_serotype_4b_str_CLIP_80459_568819 | Listeria_monocytogenes_1639_v70 | 0.9301 |
| Listeria_monocytogenes_serotype_4b_str_81-0861_1196161   | Listeria_monocytogenes_1639_v70 | 0.9192 |
| Listeria_monocytogenes_serotype_4b_str_81-0592_1196160   | Listeria_monocytogenes_1639_v70 | 0.9203 |
| Listeria_monocytogenes_serotype_4b_str_81-0558_1196159   | Listeria_monocytogenes_1639_v70 | 0.9209 |
| Listeria_monocytogenes_serotype_4b_str_10-0809_1196162   | Listeria_monocytogenes_1639_v70 | 0.9203 |
| Listeria_monocytogenes_serotype_4b_str_02-6680_1196175   | Listeria_monocytogenes_1639_v70 | 0.9269 |
| Listeria_monocytogenes_serotype_4b_str_02-6679_1196174   | Listeria_monocytogenes_1639_v70 | 0.9269 |
| Listeria_monocytogenes_serotype_4b_str_02-1792_1196173   | Listeria_monocytogenes_1639_v70 | 0.9199 |
| Listeria_monocytogenes_serotype_4b_str_02-1289_1196172   | Listeria_monocytogenes_1639_v70 | 0.9199 |
| Listeria_monocytogenes_serotype_4b_str_02-1103_1196171   | Listeria_monocytogenes_1639_v70 | 0.9199 |
| Listeria_monocytogenes_serotype_3c_str_10-5027_1196195   | Listeria_monocytogenes_1639_v70 | 0.9859 |
| Listeria_monocytogenes_serotype_1_2c_str_10-5026_1196194 | Listeria_monocytogenes_1639_v70 | 0.987  |
| Listeria_monocytogenes_serotype_1_2c_str_10-5025_1196193 | Listeria_monocytogenes_1639_v70 | 0.987  |
| Listeria_monocytogenes_serotype_1_2b_str_10-0811_1196164 | Listeria_monocytogenes_1639_v70 | 0.9373 |
| Listeria_monocytogenes_serotype_1_2b_str_10-0810_1196163 | Listeria_monocytogenes_1639_v70 | 0.9373 |
| Listeria_monocytogenes_serotype_1_2a_str_99-6370_1196179 | Listeria_monocytogenes_1639_v70 | 0.9455 |
| Listeria_monocytogenes_serotype_1_2a_str_98-2035_1196178 | Listeria_monocytogenes_1639_v70 | 0.9455 |
| Listeria_monocytogenes_serotype_1_2a_str_95-0093_1196177 | Listeria_monocytogenes_1639_v70 | 0.9507 |
| Listeria_monocytogenes_serotype_1_2a_str_88-0478_1196176 | Listeria_monocytogenes_1639_v70 | 0.9536 |
| Listeria_monocytogenes_serotype_1_2a_str_10-5024_1196192 | Listeria_monocytogenes_1639_v70 | 0.9518 |
| Listeria_monocytogenes_serotype_1_2a_str_10-4758_1196168 | Listeria_monocytogenes_1639_v70 | 0.9551 |
| Listeria_monocytogenes_serotype_1_2a_str_10-4754_1196167 | Listeria_monocytogenes_1639_v70 | 0.9551 |
| Listeria_monocytogenes_serotype_1_2a_str_10-1321_1196191 | Listeria_monocytogenes_1639_v70 | 0.9518 |
| Listeria_monocytogenes_serotype_1_2a_str_10-1047_1196190 | Listeria_monocytogenes_1639_v70 | 0.9518 |
| Listeria_monocytogenes_serotype_1_2a_str_10-1046_1196189 | Listeria_monocytogenes_1639_v70 | 0.9518 |
| Listeria_monocytogenes_serotype_1_2a_str_10-0934_1196170 | Listeria_monocytogenes_1639_v70 | 0.9523 |
| Listeria_monocytogenes_serotype_1_2a_str_10-0933_1196169 | Listeria_monocytogenes_1639_v70 | 0.9523 |
| Listeria_monocytogenes_serotype_1_2a_str_10-0815_1196188 | Listeria_monocytogenes_1639_v70 | 0.9469 |
| Listeria_monocytogenes_serotype_1_2a_str_10-0814_1196187 | Listeria_monocytogenes_1639_v70 | 0.9515 |
| Listeria_monocytogenes_serotype_1_2a_str_10-0813_1196166 | Listeria_monocytogenes_1639_v70 | 0.9535 |
| Listeria_monocytogenes_serotype_1_2a_str_10-0812_1196165 | Listeria_monocytogenes_1639_v70 | 0.9535 |
| Listeria_monocytogenes_serotype_1_2a_str_08-7669_1196186 | Listeria_monocytogenes_1639_v70 | 0.9454 |
| Listeria_monocytogenes_serotype_1_2a_str_08-7374_1196185 | Listeria_monocytogenes_1639_v70 | 0.9518 |
| Listeria_monocytogenes_serotype_1_2a_str_08-6997_1196184 | Listeria_monocytogenes_1639_v70 | 0.9469 |
| Listeria_monocytogenes_serotype_1_2a_str_08-6569_1196183 | Listeria_monocytogenes_1639_v70 | 0.9469 |
| Listeria_monocytogenes_serotype_1_2a_str_08-6056_1196182 | Listeria_monocytogenes_1639_v70 | 0.9469 |
| Listeria_monocytogenes_serotype_1_2a_str_04-5457_1196181 | Listeria_monocytogenes_1639_v70 | 0.9518 |
| Listeria_monocytogenes_serotype_1_2a_str_02-5993_1196180 | Listeria_monocytogenes_1639_v70 | 0.9515 |
| Listeria_monocytogenes_R479a_1437838                     | Listeria_monocytogenes_1639_v70 | 0.9533 |
| Listeria_monocytogenes_N53-1_1234142                     | Listeria_monocytogenes_1639_v70 | 0.9025 |
| Listeria_monocytogenes_M7_1030009                        | Listeria_monocytogenes_1639_v70 | 0.9067 |
| Listeria_monocytogenes_LO28_393132                       | Listeria_monocytogenes_1639_v70 | 0.98   |
| Listeria_monocytogenes_L99_563174                        | Listeria_monocytogenes_1639_v70 | 0.9074 |
| Listeria_monocytogenes_L312_882094                       | Listeria_monocytogenes_1639_v70 | 0.9301 |
| Listeria_monocytogenes_J1816_930781                      | Listeria_monocytogenes_1639_v70 | 0.9231 |
| Listeria_monocytogenes_J1-220_930782                     | Listeria_monocytogenes_1639_v70 | 0.9198 |
| Listeria_monocytogenes_J0161_393130                      | Listeria_monocytogenes_1639_v70 | 0.9427 |
| Listeria_monocytogenes_HCC23_552536                      | Listeria_monocytogenes_1639_v70 | 0.9067 |
| Listeria_monocytogenes_FSL_R2-561_393126                 | Listeria_monocytogenes_1639_v70 | 0.9822 |
| Listeria_monocytogenes_FSL_J1-208_393119                 | Listeria_monocytogenes_1639_v70 | 0.8943 |
| Listeria_monocytogenes_FSL_J1-175_393118                 | Listeria_monocytogenes_1639_v70 | 0.9401 |
| Listeria_monocytogenes_Finland_1998_393127               | Listeria_monocytogenes_1639_v70 | 0.9462 |
| Listeria_monocytogenes_EGD-e_169963_v1                   | Listeria_monocytogenes_1639_v70 | 0.966  |
| Listeria_monocytogenes_EGD-e_169963                      | Listeria_monocytogenes_1639_v70 | 0.966  |
| Listeria_monocytogenes_EGD_1334565                       | Listeria_monocytogenes_1639_v70 | 0.9532 |
| Listeria_monocytogenes_CFSAN002349_1299895               | Listeria_monocytogenes_1639_v70 | 0.9304 |
| Listeria_monocytogenes_ATCC_19117_882095_v1              | Listeria_monocytogenes_1639_v70 | 0.923  |
| Listeria_monocytogenes_ATCC_19117_882095                 | Listeria_monocytogenes_1639_v70 | 0.9229 |
| Listeria_monocytogenes_6179_1288295                      | Listeria_monocytogenes_1639_v70 | 0.9457 |
| Listeria_monocytogenes_1639_v9                           | Listeria_monocytogenes_1639_v70 | 0.928  |
| Listeria_monocytogenes_1639_v99                          | Listeria_monocytogenes_1639_v70 | 0.9272 |
| Listeria_monocytogenes_1639_v98                          | Listeria_monocytogenes_1639_v70 | 0.9463 |
| Listeria_monocytogenes_1639_v97                          | Listeria_monocytogenes_1639_v70 | 0.9285 |
| Listeria_monocytogenes_1639_v96                          | Listeria_monocytogenes_1639_v70 | 0.9269 |
| Listeria_monocytogenes_1639_v95                          | Listeria_monocytogenes_1639_v70 | 0.9269 |
| Listeria_monocytogenes_1639_v94                          | Listeria_monocytogenes_1639_v70 | 0.9269 |
| Listeria_monocytogenes_1639_v93                          | Listeria_monocytogenes_1639_v70 | 0.943  |
| Listeria_monocytogenes_1639_v92                          | Listeria_monocytogenes_1639_v70 | 0.9284 |



|                                                          |                                 |        |
|----------------------------------------------------------|---------------------------------|--------|
| Listeria_monocytogenes_1639_v91                          | Listeria_monocytogenes_1639_v70 | 0.926  |
| Listeria_monocytogenes_1639_v90                          | Listeria_monocytogenes_1639_v70 | 0.9463 |
| Listeria_monocytogenes_1639_v8                           | Listeria_monocytogenes_1639_v70 | 0.9418 |
| Listeria_monocytogenes_1639_v89                          | Listeria_monocytogenes_1639_v70 | 0.9282 |
| Listeria_monocytogenes_1639_v88                          | Listeria_monocytogenes_1639_v70 | 0.9584 |
| Listeria_monocytogenes_1639_v87                          | Listeria_monocytogenes_1639_v70 | 0.9512 |
| Listeria_monocytogenes_1639_v86                          | Listeria_monocytogenes_1639_v70 | 0.9505 |
| Listeria_monocytogenes_1639_v85                          | Listeria_monocytogenes_1639_v70 | 0.9167 |
| Listeria_monocytogenes_1639_v84                          | Listeria_monocytogenes_1639_v70 | 0.9583 |
| Listeria_monocytogenes_1639_v83                          | Listeria_monocytogenes_1639_v70 | 0.9175 |
| Listeria_monocytogenes_1639_v82                          | Listeria_monocytogenes_1639_v70 | 0.9172 |
| Listeria_monocytogenes_1639_v81                          | Listeria_monocytogenes_1639_v70 | 0.9595 |
| Listeria_monocytogenes_1639_v80                          | Listeria_monocytogenes_1639_v70 | 0.9375 |
| Listeria_monocytogenes_1639_v7                           | Listeria_monocytogenes_1639_v70 | 0.9418 |
| Listeria_monocytogenes_1639_v79                          | Listeria_monocytogenes_1639_v70 | 0.9548 |
| Listeria_monocytogenes_1639_v78                          | Listeria_monocytogenes_1639_v70 | 0.9581 |
| Listeria_monocytogenes_1639_v77                          | Listeria_monocytogenes_1639_v70 | 0.946  |
| Listeria_monocytogenes_1639_v76                          | Listeria_monocytogenes_1639_v70 | 0.9477 |
| Listeria_monocytogenes_1639_v75                          | Listeria_monocytogenes_1639_v70 | 0.9074 |
| Listeria_monocytogenes_1639_v74                          | Listeria_monocytogenes_1639_v70 | 0.9401 |
| Listeria_monocytogenes_1639_v73                          | Listeria_monocytogenes_1639_v70 | 0.9805 |
| Listeria_monocytogenes_1639_v72                          | Listeria_monocytogenes_1639_v70 | 0.9174 |
| Listeria_monocytogenes_1639_v71                          | Listeria_monocytogenes_1639_v70 | 0.9391 |
| Listeria_monocytogenes_1639_v70                          | Listeria_monocytogenes_1639_v70 | 0.0697 |
| Listeria_welshimeri_1643                                 | Listeria_monocytogenes_1639_v71 | 0.8557 |
| Listeria_welshimeri_serovar_6b_str_SLCC5334_386043       | Listeria_monocytogenes_1639_v71 | 0.8554 |
| Listeria_seeligeri_serovar_1_2b_str_SLCC3954_683837      | Listeria_monocytogenes_1639_v71 | 0.8652 |
| Listeria_seeligeri_FSL_S4-171_702452                     | Listeria_monocytogenes_1639_v71 | 0.8055 |
| Listeria_seeligeri_FSL_N1-067_702453                     | Listeria_monocytogenes_1639_v71 | 0.8507 |
| Listeria_seeligeri_1640_v1                               | Listeria_monocytogenes_1639_v71 | 0.8627 |
| Listeria_seeligeri_1640                                  | Listeria_monocytogenes_1639_v71 | 0.8615 |
| Listeria_monocytogenes_WSLC1042_1457188                  | Listeria_monocytogenes_1639_v71 | 0.9058 |
| Listeria_monocytogenes_WSLC1001_1457187                  | Listeria_monocytogenes_1639_v71 | 0.9444 |
| Listeria_monocytogenes_SLCC7179_879090                   | Listeria_monocytogenes_1639_v71 | 0.933  |
| Listeria_monocytogenes_SLCC5850_882096                   | Listeria_monocytogenes_1639_v71 | 0.9452 |
| Listeria_monocytogenes_SLCC2755_932919                   | Listeria_monocytogenes_1639_v71 | 0.9146 |
| Listeria_monocytogenes_SLCC2540_879089                   | Listeria_monocytogenes_1639_v71 | 0.9273 |
| Listeria_monocytogenes_SLCC2479_882020                   | Listeria_monocytogenes_1639_v71 | 0.9403 |
| Listeria_monocytogenes_SLCC2378_879088                   | Listeria_monocytogenes_1639_v71 | 0.9068 |
| Listeria_monocytogenes_SLCC2376_882097                   | Listeria_monocytogenes_1639_v71 | 0.9142 |
| Listeria_monocytogenes_SLCC2372_932920                   | Listeria_monocytogenes_1639_v71 | 0.9356 |
| Listeria_monocytogenes_serotype_4b_str_LL195_1230340     | Listeria_monocytogenes_1639_v71 | 0.9122 |
| Listeria_monocytogenes_serotype_4b_str_LIS0087_1134669   | Listeria_monocytogenes_1639_v71 | 0.9248 |
| Listeria_monocytogenes_serotype_4b_str_F2365_265669      | Listeria_monocytogenes_1639_v71 | 0.9122 |
| Listeria_monocytogenes_serotype_4b_str_CLIP_80459_568819 | Listeria_monocytogenes_1639_v71 | 0.9192 |
| Listeria_monocytogenes_serotype_4b_str_81-0861_1196161   | Listeria_monocytogenes_1639_v71 | 0.903  |
| Listeria_monocytogenes_serotype_4b_str_81-0592_1196160   | Listeria_monocytogenes_1639_v71 | 0.904  |
| Listeria_monocytogenes_serotype_4b_str_81-0558_1196159   | Listeria_monocytogenes_1639_v71 | 0.9044 |
| Listeria_monocytogenes_serotype_4b_str_10-0809_1196162   | Listeria_monocytogenes_1639_v71 | 0.904  |
| Listeria_monocytogenes_serotype_4b_str_02-6680_1196175   | Listeria_monocytogenes_1639_v71 | 0.9175 |
| Listeria_monocytogenes_serotype_4b_str_02-6679_1196174   | Listeria_monocytogenes_1639_v71 | 0.9175 |
| Listeria_monocytogenes_serotype_4b_str_02-1792_1196173   | Listeria_monocytogenes_1639_v71 | 0.9033 |
| Listeria_monocytogenes_serotype_4b_str_02-1289_1196172   | Listeria_monocytogenes_1639_v71 | 0.9033 |
| Listeria_monocytogenes_serotype_4b_str_02-1103_1196171   | Listeria_monocytogenes_1639_v71 | 0.9033 |
| Listeria_monocytogenes_serotype_3c_str_10-5027_1196195   | Listeria_monocytogenes_1639_v71 | 0.9403 |
| Listeria_monocytogenes_serotype_1_2c_str_10-5026_1196194 | Listeria_monocytogenes_1639_v71 | 0.941  |
| Listeria_monocytogenes_serotype_1_2c_str_10-5025_1196193 | Listeria_monocytogenes_1639_v71 | 0.941  |
| Listeria_monocytogenes_serotype_1_2b_str_10-0811_1196164 | Listeria_monocytogenes_1639_v71 | 0.9226 |
| Listeria_monocytogenes_serotype_1_2b_str_10-0810_1196163 | Listeria_monocytogenes_1639_v71 | 0.9226 |
| Listeria_monocytogenes_serotype_1_2a_str_99-6370_1196179 | Listeria_monocytogenes_1639_v71 | 0.9327 |
| Listeria_monocytogenes_serotype_1_2a_str_98-2035_1196178 | Listeria_monocytogenes_1639_v71 | 0.9327 |
| Listeria_monocytogenes_serotype_1_2a_str_95-0093_1196177 | Listeria_monocytogenes_1639_v71 | 0.9367 |
| Listeria_monocytogenes_serotype_1_2a_str_88-0478_1196176 | Listeria_monocytogenes_1639_v71 | 0.9359 |
| Listeria_monocytogenes_serotype_1_2a_str_10-5024_1196192 | Listeria_monocytogenes_1639_v71 | 0.937  |
| Listeria_monocytogenes_serotype_1_2a_str_10-0814_1196168 | Listeria_monocytogenes_1639_v71 | 0.9431 |
| Listeria_monocytogenes_serotype_1_2a_str_10-4754_1196167 | Listeria_monocytogenes_1639_v71 | 0.9434 |
| Listeria_monocytogenes_serotype_1_2a_str_10-1321_1196191 | Listeria_monocytogenes_1639_v71 | 0.937  |
| Listeria_monocytogenes_serotype_1_2a_str_10-1047_1196190 | Listeria_monocytogenes_1639_v71 | 0.9374 |
| Listeria_monocytogenes_serotype_1_2a_str_10-1046_1196189 | Listeria_monocytogenes_1639_v71 | 0.9374 |
| Listeria_monocytogenes_serotype_1_2a_str_10-0934_1196170 | Listeria_monocytogenes_1639_v71 | 0.9374 |
| Listeria_monocytogenes_serotype_1_2a_str_10-0933_1196169 | Listeria_monocytogenes_1639_v71 | 0.9374 |
| Listeria_monocytogenes_serotype_1_2a_str_10-0815_1196188 | Listeria_monocytogenes_1639_v71 | 0.9333 |
| Listeria_monocytogenes_serotype_1_2a_str_10-0814_1196187 | Listeria_monocytogenes_1639_v71 | 0.9374 |
| Listeria_monocytogenes_serotype_1_2a_str_10-0813_1196166 | Listeria_monocytogenes_1639_v71 | 0.9412 |
| Listeria_monocytogenes_serotype_1_2a_str_10-0812_1196165 | Listeria_monocytogenes_1639_v71 | 0.9412 |
| Listeria_monocytogenes_serotype_1_2a_str_08-7669_1196186 | Listeria_monocytogenes_1639_v71 | 0.9323 |
| Listeria_monocytogenes_serotype_1_2a_str_08-7374_1196185 | Listeria_monocytogenes_1639_v71 | 0.937  |
| Listeria_monocytogenes_serotype_1_2a_str_08-6997_1196184 | Listeria_monocytogenes_1639_v71 | 0.9333 |
| Listeria_monocytogenes_serotype_1_2a_str_08-6569_1196183 | Listeria_monocytogenes_1639_v71 | 0.9333 |
| Listeria_monocytogenes_serotype_1_2a_str_08-6056_1196182 | Listeria_monocytogenes_1639_v71 | 0.9333 |
| Listeria_monocytogenes_serotype_1_2a_str_04-5457_1196181 | Listeria_monocytogenes_1639_v71 | 0.937  |
| Listeria_monocytogenes_serotype_1_2a_str_02-5993_1196180 | Listeria_monocytogenes_1639_v71 | 0.937  |
| Listeria_monocytogenes_R479a_1437838                     | Listeria_monocytogenes_1639_v71 | 0.9411 |
| Listeria_monocytogenes_N53-1_1234142                     | Listeria_monocytogenes_1639_v71 | 0.8864 |
| Listeria_monocytogenes_M7_1030009                        | Listeria_monocytogenes_1639_v71 | 0.8988 |
| Listeria_monocytogenes_LO28_393132                       | Listeria_monocytogenes_1639_v71 | 0.9356 |
| Listeria_monocytogenes_L99_563174                        | Listeria_monocytogenes_1639_v71 | 0.8991 |
| Listeria_monocytogenes_L312_882094                       | Listeria_monocytogenes_1639_v71 | 0.9192 |
| Listeria_monocytogenes_J1816_930781                      | Listeria_monocytogenes_1639_v71 | 0.9103 |
| Listeria_monocytogenes_J1-220_930782                     | Listeria_monocytogenes_1639_v71 | 0.9084 |
| Listeria_monocytogenes_J0161_393130                      | Listeria_monocytogenes_1639_v71 | 0.94   |

|                                                          |                                 |        |
|----------------------------------------------------------|---------------------------------|--------|
| Listeria_monocytogenes_HCC23_552536                      | Listeria_monocytogenes_1639_v71 | 0.8984 |
| Listeria_monocytogenes_FSL_R2-561_393126                 | Listeria_monocytogenes_1639_v71 | 0.9393 |
| Listeria_monocytogenes_FSL_J1-208_393119                 | Listeria_monocytogenes_1639_v71 | 0.8848 |
| Listeria_monocytogenes_FSL_J1-175_393118                 | Listeria_monocytogenes_1639_v71 | 0.9273 |
| Listeria_monocytogenes_Finland_1998_393127               | Listeria_monocytogenes_1639_v71 | 0.94   |
| Listeria_monocytogenes_EGD-e_169963_v1                   | Listeria_monocytogenes_1639_v71 | 0.9313 |
| Listeria_monocytogenes_EGD-e_169963                      | Listeria_monocytogenes_1639_v71 | 0.9316 |
| Listeria_monocytogenes_EGD_1334565                       | Listeria_monocytogenes_1639_v71 | 0.946  |
| Listeria_monocytogenes_CFSAN002349_1299895               | Listeria_monocytogenes_1639_v71 | 0.9176 |
| Listeria_monocytogenes_ATCC_19117_882095_v1              | Listeria_monocytogenes_1639_v71 | 0.9125 |
| Listeria_monocytogenes_ATCC_19117_882095                 | Listeria_monocytogenes_1639_v71 | 0.9121 |
| Listeria_monocytogenes_6179_1288295                      | Listeria_monocytogenes_1639_v71 | 0.943  |
| Listeria_monocytogenes_1639_v9                           | Listeria_monocytogenes_1639_v71 | 0.9142 |
| Listeria_monocytogenes_1639_v99                          | Listeria_monocytogenes_1639_v71 | 0.9147 |
| Listeria_monocytogenes_1639_v98                          | Listeria_monocytogenes_1639_v71 | 0.9319 |
| Listeria_monocytogenes_1639_v97                          | Listeria_monocytogenes_1639_v71 | 0.9163 |
| Listeria_monocytogenes_1639_v96                          | Listeria_monocytogenes_1639_v71 | 0.9137 |
| Listeria_monocytogenes_1639_v95                          | Listeria_monocytogenes_1639_v71 | 0.9137 |
| Listeria_monocytogenes_1639_v94                          | Listeria_monocytogenes_1639_v71 | 0.9144 |
| Listeria_monocytogenes_1639_v93                          | Listeria_monocytogenes_1639_v71 | 0.9421 |
| Listeria_monocytogenes_1639_v92                          | Listeria_monocytogenes_1639_v71 | 0.9137 |
| Listeria_monocytogenes_1639_v91                          | Listeria_monocytogenes_1639_v71 | 0.9091 |
| Listeria_monocytogenes_1639_v90                          | Listeria_monocytogenes_1639_v71 | 0.9319 |
| Listeria_monocytogenes_1639_v8                           | Listeria_monocytogenes_1639_v71 | 0.9313 |
| Listeria_monocytogenes_1639_v89                          | Listeria_monocytogenes_1639_v71 | 0.9144 |
| Listeria_monocytogenes_1639_v88                          | Listeria_monocytogenes_1639_v71 | 0.9409 |
| Listeria_monocytogenes_1639_v87                          | Listeria_monocytogenes_1639_v71 | 0.9364 |
| Listeria_monocytogenes_1639_v86                          | Listeria_monocytogenes_1639_v71 | 0.936  |
| Listeria_monocytogenes_1639_v85                          | Listeria_monocytogenes_1639_v71 | 0.9027 |
| Listeria_monocytogenes_1639_v84                          | Listeria_monocytogenes_1639_v71 | 0.9467 |
| Listeria_monocytogenes_1639_v83                          | Listeria_monocytogenes_1639_v71 | 0.9087 |
| Listeria_monocytogenes_1639_v82                          | Listeria_monocytogenes_1639_v71 | 0.9084 |
| Listeria_monocytogenes_1639_v81                          | Listeria_monocytogenes_1639_v71 | 0.9472 |
| Listeria_monocytogenes_1639_v80                          | Listeria_monocytogenes_1639_v71 | 0.9282 |
| Listeria_monocytogenes_1639_v7                           | Listeria_monocytogenes_1639_v71 | 0.9313 |
| Listeria_monocytogenes_1639_v79                          | Listeria_monocytogenes_1639_v71 | 0.944  |
| Listeria_monocytogenes_1639_v78                          | Listeria_monocytogenes_1639_v71 | 0.9465 |
| Listeria_monocytogenes_1639_v77                          | Listeria_monocytogenes_1639_v71 | 0.9355 |
| Listeria_monocytogenes_1639_v76                          | Listeria_monocytogenes_1639_v71 | 0.9362 |
| Listeria_monocytogenes_1639_v75                          | Listeria_monocytogenes_1639_v71 | 0.8991 |
| Listeria_monocytogenes_1639_v74                          | Listeria_monocytogenes_1639_v71 | 0.9481 |
| Listeria_monocytogenes_1639_v73                          | Listeria_monocytogenes_1639_v71 | 0.9305 |
| Listeria_monocytogenes_1639_v72                          | Listeria_monocytogenes_1639_v71 | 0.9057 |
| Listeria_monocytogenes_1639_v71                          | Listeria_monocytogenes_1639_v71 | 0.0701 |
| Listeria_welshimeri_1643                                 | Listeria_monocytogenes_1639_v72 | 0.8823 |
| Listeria_welshimeri_serovar_6b_str_SLCC5334_386043       | Listeria_monocytogenes_1639_v72 | 0.8817 |
| Listeria_seeligeri_serovar_1_2b_str_SLCC3954_683837      | Listeria_monocytogenes_1639_v72 | 0.8764 |
| Listeria_seeligeri_FSL_S4-171_702452                     | Listeria_monocytogenes_1639_v72 | 0.8239 |
| Listeria_seeligeri_FSL_N1-067_702453                     | Listeria_monocytogenes_1639_v72 | 0.8253 |
| Listeria_seeligeri_1640_v1                               | Listeria_monocytogenes_1639_v72 | 0.8826 |
| Listeria_seeligeri_1640                                  | Listeria_monocytogenes_1639_v72 | 0.8796 |
| Listeria_monocytogenes_WSLC1042_1457188                  | Listeria_monocytogenes_1639_v72 | 0.9679 |
| Listeria_monocytogenes_WSLC1001_1457187                  | Listeria_monocytogenes_1639_v72 | 0.9226 |
| Listeria_monocytogenes_SLCC7179_879090                   | Listeria_monocytogenes_1639_v72 | 0.9359 |
| Listeria_monocytogenes_SLCC5850_882096                   | Listeria_monocytogenes_1639_v72 | 0.9264 |
| Listeria_monocytogenes_SLCC2755_932919                   | Listeria_monocytogenes_1639_v72 | 0.933  |
| Listeria_monocytogenes_SLCC2540_879089                   | Listeria_monocytogenes_1639_v72 | 0.9383 |
| Listeria_monocytogenes_SLCC2479_882020                   | Listeria_monocytogenes_1639_v72 | 0.9201 |
| Listeria_monocytogenes_SLCC2378_879088                   | Listeria_monocytogenes_1639_v72 | 0.9694 |
| Listeria_monocytogenes_SLCC2376_882097                   | Listeria_monocytogenes_1639_v72 | 0.9292 |
| Listeria_monocytogenes_SLCC2372_932920                   | Listeria_monocytogenes_1639_v72 | 0.913  |
| Listeria_monocytogenes_serotype_4b_str_LL195_1230340     | Listeria_monocytogenes_1639_v72 | 0.9646 |
| Listeria_monocytogenes_serotype_4b_str_LIS0087_1134669   | Listeria_monocytogenes_1639_v72 | 0.912  |
| Listeria_monocytogenes_serotype_4b_str_F2365_265669      | Listeria_monocytogenes_1639_v72 | 0.9646 |
| Listeria_monocytogenes_serotype_4b_str_CLIP_80459_568819 | Listeria_monocytogenes_1639_v72 | 0.9604 |
| Listeria_monocytogenes_serotype_4b_str_81-0861_1196161   | Listeria_monocytogenes_1639_v72 | 0.972  |
| Listeria_monocytogenes_serotype_4b_str_81-0592_1196160   | Listeria_monocytogenes_1639_v72 | 0.9731 |
| Listeria_monocytogenes_serotype_4b_str_81-0558_1196159   | Listeria_monocytogenes_1639_v72 | 0.9727 |
| Listeria_monocytogenes_serotype_4b_str_10-0809_1196162   | Listeria_monocytogenes_1639_v72 | 0.9731 |
| Listeria_monocytogenes_serotype_4b_str_02-6680_1196175   | Listeria_monocytogenes_1639_v72 | 0.9662 |
| Listeria_monocytogenes_serotype_4b_str_02-6679_1196174   | Listeria_monocytogenes_1639_v72 | 0.9662 |
| Listeria_monocytogenes_serotype_4b_str_02-1792_1196173   | Listeria_monocytogenes_1639_v72 | 0.9742 |
| Listeria_monocytogenes_serotype_4b_str_02-1289_1196172   | Listeria_monocytogenes_1639_v72 | 0.9742 |
| Listeria_monocytogenes_serotype_4b_str_02-1103_1196171   | Listeria_monocytogenes_1639_v72 | 0.9742 |
| Listeria_monocytogenes_serotype_3c_str_10-5027_1196195   | Listeria_monocytogenes_1639_v72 | 0.9197 |
| Listeria_monocytogenes_serotype_1_2c_str_10-5026_1196194 | Listeria_monocytogenes_1639_v72 | 0.9201 |
| Listeria_monocytogenes_serotype_1_2c_str_10-5025_1196193 | Listeria_monocytogenes_1639_v72 | 0.9201 |
| Listeria_monocytogenes_serotype_1_2b_str_10-0811_1196164 | Listeria_monocytogenes_1639_v72 | 0.9409 |
| Listeria_monocytogenes_serotype_1_2b_str_10-0810_1196163 | Listeria_monocytogenes_1639_v72 | 0.9409 |
| Listeria_monocytogenes_serotype_1_2a_str_99-6370_1196179 | Listeria_monocytogenes_1639_v72 | 0.9116 |
| Listeria_monocytogenes_serotype_1_2a_str_98-2035_1196178 | Listeria_monocytogenes_1639_v72 | 0.9116 |
| Listeria_monocytogenes_serotype_1_2a_str_95-0093_1196177 | Listeria_monocytogenes_1639_v72 | 0.9166 |
| Listeria_monocytogenes_serotype_1_2a_str_88-0478_1196176 | Listeria_monocytogenes_1639_v72 | 0.9158 |
| Listeria_monocytogenes_serotype_1_2a_str_10-5024_1196192 | Listeria_monocytogenes_1639_v72 | 0.9169 |
| Listeria_monocytogenes_serotype_1_2a_str_10-4758_1196168 | Listeria_monocytogenes_1639_v72 | 0.9287 |
| Listeria_monocytogenes_serotype_1_2a_str_10-4754_1196167 | Listeria_monocytogenes_1639_v72 | 0.9287 |
| Listeria_monocytogenes_serotype_1_2a_str_10-1321_1196191 | Listeria_monocytogenes_1639_v72 | 0.9169 |
| Listeria_monocytogenes_serotype_1_2a_str_10-1047_1196190 | Listeria_monocytogenes_1639_v72 | 0.9169 |
| Listeria_monocytogenes_serotype_1_2a_str_10-1046_1196189 | Listeria_monocytogenes_1639_v72 | 0.9169 |
| Listeria_monocytogenes_serotype_1_2a_str_10-0934_1196170 | Listeria_monocytogenes_1639_v72 | 0.9335 |
| Listeria_monocytogenes_serotype_1_2a_str_10-0933_1196169 | Listeria_monocytogenes_1639_v72 | 0.9335 |

|                                                          |                                 |        |
|----------------------------------------------------------|---------------------------------|--------|
| Listeria_monocytogenes_serotype_1_2a_str_10-0815_1196188 | Listeria_monocytogenes_1639_v72 | 0.9125 |
| Listeria_monocytogenes_serotype_1_2a_str_10-0814_1196187 | Listeria_monocytogenes_1639_v72 | 0.9169 |
| Listeria_monocytogenes_serotype_1_2a_str_10-0813_1196166 | Listeria_monocytogenes_1639_v72 | 0.9299 |
| Listeria_monocytogenes_serotype_1_2a_str_10-0812_1196165 | Listeria_monocytogenes_1639_v72 | 0.9299 |
| Listeria_monocytogenes_serotype_1_2a_str_08-7669_1196186 | Listeria_monocytogenes_1639_v72 | 0.9254 |
| Listeria_monocytogenes_serotype_1_2a_str_08-7374_1196185 | Listeria_monocytogenes_1639_v72 | 0.9169 |
| Listeria_monocytogenes_serotype_1_2a_str_08-6997_1196184 | Listeria_monocytogenes_1639_v72 | 0.9125 |
| Listeria_monocytogenes_serotype_1_2a_str_08-6569_1196183 | Listeria_monocytogenes_1639_v72 | 0.9125 |
| Listeria_monocytogenes_serotype_1_2a_str_08-6056_1196182 | Listeria_monocytogenes_1639_v72 | 0.9125 |
| Listeria_monocytogenes_serotype_1_2a_str_04-5457_1196181 | Listeria_monocytogenes_1639_v72 | 0.9169 |
| Listeria_monocytogenes_serotype_1_2a_str_02-5993_1196180 | Listeria_monocytogenes_1639_v72 | 0.9166 |
| Listeria_monocytogenes_R479a_1437838                     | Listeria_monocytogenes_1639_v72 | 0.9133 |
| Listeria_monocytogenes_N53-1_1234142                     | Listeria_monocytogenes_1639_v72 | 0.8868 |
| Listeria_monocytogenes_M7_1030009                        | Listeria_monocytogenes_1639_v72 | 0.9078 |
| Listeria_monocytogenes_LO28_393132                       | Listeria_monocytogenes_1639_v72 | 0.9251 |
| Listeria_monocytogenes_L99_563174                        | Listeria_monocytogenes_1639_v72 | 0.9085 |
| Listeria_monocytogenes_L312_882094                       | Listeria_monocytogenes_1639_v72 | 0.9608 |
| Listeria_monocytogenes_J1816_930781                      | Listeria_monocytogenes_1639_v72 | 0.9463 |
| Listeria_monocytogenes_J1-220_930782                     | Listeria_monocytogenes_1639_v72 | 0.984  |
| Listeria_monocytogenes_J0161_393130                      | Listeria_monocytogenes_1639_v72 | 0.9303 |
| Listeria_monocytogenes_HCC23_552536                      | Listeria_monocytogenes_1639_v72 | 0.9078 |
| Listeria_monocytogenes_FSL_R2-561_393126                 | Listeria_monocytogenes_1639_v72 | 0.9183 |
| Listeria_monocytogenes_FSL_J1-208_393119                 | Listeria_monocytogenes_1639_v72 | 0.9101 |
| Listeria_monocytogenes_FSL_J1-175_393118                 | Listeria_monocytogenes_1639_v72 | 0.9464 |
| Listeria_monocytogenes_Finland_1998_393127               | Listeria_monocytogenes_1639_v72 | 0.935  |
| Listeria_monocytogenes_EGD-e_169963_v1                   | Listeria_monocytogenes_1639_v72 | 0.936  |
| Listeria_monocytogenes_EGD-e_169963                      | Listeria_monocytogenes_1639_v72 | 0.9364 |
| Listeria_monocytogenes_EGD_1334565                       | Listeria_monocytogenes_1639_v72 | 0.9271 |
| Listeria_monocytogenes_CFSAN002349_1299895               | Listeria_monocytogenes_1639_v72 | 0.9598 |
| Listeria_monocytogenes_ATCC_19117_882095_v1              | Listeria_monocytogenes_1639_v72 | 0.9867 |
| Listeria_monocytogenes_ATCC_19117_882095                 | Listeria_monocytogenes_1639_v72 | 0.9867 |
| Listeria_monocytogenes_6179_1288295                      | Listeria_monocytogenes_1639_v72 | 0.9165 |
| Listeria_monocytogenes_1639_v9                           | Listeria_monocytogenes_1639_v72 | 0.9285 |
| Listeria_monocytogenes_1639_v99                          | Listeria_monocytogenes_1639_v72 | 0.9471 |
| Listeria_monocytogenes_1639_v98                          | Listeria_monocytogenes_1639_v72 | 0.9276 |
| Listeria_monocytogenes_1639_v97                          | Listeria_monocytogenes_1639_v72 | 0.9606 |
| Listeria_monocytogenes_1639_v96                          | Listeria_monocytogenes_1639_v72 | 0.946  |
| Listeria_monocytogenes_1639_v95                          | Listeria_monocytogenes_1639_v72 | 0.9461 |
| Listeria_monocytogenes_1639_v94                          | Listeria_monocytogenes_1639_v72 | 0.946  |
| Listeria_monocytogenes_1639_v93                          | Listeria_monocytogenes_1639_v72 | 0.9143 |
| Listeria_monocytogenes_1639_v92                          | Listeria_monocytogenes_1639_v72 | 0.9483 |
| Listeria_monocytogenes_1639_v91                          | Listeria_monocytogenes_1639_v72 | 0.9627 |
| Listeria_monocytogenes_1639_v90                          | Listeria_monocytogenes_1639_v72 | 0.9276 |
| Listeria_monocytogenes_1639_v8                           | Listeria_monocytogenes_1639_v72 | 0.9066 |
| Listeria_monocytogenes_1639_v89                          | Listeria_monocytogenes_1639_v72 | 0.9695 |
| Listeria_monocytogenes_1639_v88                          | Listeria_monocytogenes_1639_v72 | 0.921  |
| Listeria_monocytogenes_1639_v87                          | Listeria_monocytogenes_1639_v72 | 0.928  |
| Listeria_monocytogenes_1639_v86                          | Listeria_monocytogenes_1639_v72 | 0.9273 |
| Listeria_monocytogenes_1639_v85                          | Listeria_monocytogenes_1639_v72 | 0.9731 |
| Listeria_monocytogenes_1639_v84                          | Listeria_monocytogenes_1639_v72 | 0.9265 |
| Listeria_monocytogenes_1639_v83                          | Listeria_monocytogenes_1639_v72 | 0.9884 |
| Listeria_monocytogenes_1639_v82                          | Listeria_monocytogenes_1639_v72 | 0.9876 |
| Listeria_monocytogenes_1639_v81                          | Listeria_monocytogenes_1639_v72 | 0.9236 |
| Listeria_monocytogenes_1639_v80                          | Listeria_monocytogenes_1639_v72 | 0.9452 |
| Listeria_monocytogenes_1639_v7                           | Listeria_monocytogenes_1639_v72 | 0.9066 |
| Listeria_monocytogenes_1639_v79                          | Listeria_monocytogenes_1639_v72 | 0.9227 |
| Listeria_monocytogenes_1639_v78                          | Listeria_monocytogenes_1639_v72 | 0.9241 |
| Listeria_monocytogenes_1639_v77                          | Listeria_monocytogenes_1639_v72 | 0.9256 |
| Listeria_monocytogenes_1639_v76                          | Listeria_monocytogenes_1639_v72 | 0.9176 |
| Listeria_monocytogenes_1639_v75                          | Listeria_monocytogenes_1639_v72 | 0.9085 |
| Listeria_monocytogenes_1639_v74                          | Listeria_monocytogenes_1639_v72 | 0.921  |
| Listeria_monocytogenes_1639_v73                          | Listeria_monocytogenes_1639_v72 | 0.9199 |
| Listeria_monocytogenes_1639_v72                          | Listeria_monocytogenes_1639_v72 | 0.0697 |
| Listeria_welshimeri_1643                                 | Listeria_monocytogenes_1639_v73 | 0.8645 |
| Listeria_welshimeri_serovar_6b_str_SLCC5334_386043       | Listeria_monocytogenes_1639_v73 | 0.8641 |
| Listeria_seeligeri_serovar_1_2b_str_SLCC3954_683837      | Listeria_monocytogenes_1639_v73 | 0.8683 |
| Listeria_seeligeri_FSL_S4-171_702452                     | Listeria_monocytogenes_1639_v73 | 0.8086 |
| Listeria_seeligeri_FSL_N1-067_702453                     | Listeria_monocytogenes_1639_v73 | 0.8298 |
| Listeria_seeligeri_1640_v1                               | Listeria_monocytogenes_1639_v73 | 0.8741 |
| Listeria_seeligeri_1640                                  | Listeria_monocytogenes_1639_v73 | 0.8698 |
| Listeria_monocytogenes_WSLC1042_1457188                  | Listeria_monocytogenes_1639_v73 | 0.9197 |
| Listeria_monocytogenes_WSLC1001_1457187                  | Listeria_monocytogenes_1639_v73 | 0.9506 |
| Listeria_monocytogenes_SLCC7179_879090                   | Listeria_monocytogenes_1639_v73 | 0.9494 |
| Listeria_monocytogenes_SLCC5850_882096                   | Listeria_monocytogenes_1639_v73 | 0.9496 |
| Listeria_monocytogenes_SLCC2755_932919                   | Listeria_monocytogenes_1639_v73 | 0.927  |
| Listeria_monocytogenes_SLCC2540_879089                   | Listeria_monocytogenes_1639_v73 | 0.9375 |
| Listeria_monocytogenes_SLCC2479_882020                   | Listeria_monocytogenes_1639_v73 | 0.9753 |
| Listeria_monocytogenes_SLCC2378_879088                   | Listeria_monocytogenes_1639_v73 | 0.9208 |
| Listeria_monocytogenes_SLCC2376_882097                   | Listeria_monocytogenes_1639_v73 | 0.9262 |
| Listeria_monocytogenes_SLCC2372_932920                   | Listeria_monocytogenes_1639_v73 | 0.9776 |
| Listeria_monocytogenes_serotype_4b_str_LL195_1230340     | Listeria_monocytogenes_1639_v73 | 0.9248 |
| Listeria_monocytogenes_serotype_4b_str_LIS0087_1134669   | Listeria_monocytogenes_1639_v73 | 0.9359 |
| Listeria_monocytogenes_serotype_4b_str_F2365_265669      | Listeria_monocytogenes_1639_v73 | 0.9248 |
| Listeria_monocytogenes_serotype_4b_str_CLIP_80459_568819 | Listeria_monocytogenes_1639_v73 | 0.9273 |
| Listeria_monocytogenes_serotype_4b_str_81-0861_1196161   | Listeria_monocytogenes_1639_v73 | 0.9224 |
| Listeria_monocytogenes_serotype_4b_str_81-0592_1196160   | Listeria_monocytogenes_1639_v73 | 0.9234 |
| Listeria_monocytogenes_serotype_4b_str_81-0558_1196159   | Listeria_monocytogenes_1639_v73 | 0.9238 |
| Listeria_monocytogenes_serotype_4b_str_10-0809_1196162   | Listeria_monocytogenes_1639_v73 | 0.9234 |
| Listeria_monocytogenes_serotype_4b_str_02-6680_1196175   | Listeria_monocytogenes_1639_v73 | 0.9245 |
| Listeria_monocytogenes_serotype_4b_str_02-6679_1196174   | Listeria_monocytogenes_1639_v73 | 0.9245 |
| Listeria_monocytogenes_serotype_4b_str_02-1792_1196173   | Listeria_monocytogenes_1639_v73 | 0.9242 |

|                                                          |                                 |        |
|----------------------------------------------------------|---------------------------------|--------|
| Listeria_monocytogenes_serotype_4b_str_02-1289_1196172   | Listeria_monocytogenes_1639_v73 | 0.9242 |
| Listeria_monocytogenes_serotype_4b_str_02-1103_1196171   | Listeria_monocytogenes_1639_v73 | 0.9242 |
| Listeria_monocytogenes_serotype_3c_str_10-5027_1196195   | Listeria_monocytogenes_1639_v73 | 0.9789 |
| Listeria_monocytogenes_serotype_1_2c_str_10-5026_1196194 | Listeria_monocytogenes_1639_v73 | 0.9797 |
| Listeria_monocytogenes_serotype_1_2c_str_10-5025_1196193 | Listeria_monocytogenes_1639_v73 | 0.9797 |
| Listeria_monocytogenes_serotype_1_2b_str_10-0811_1196164 | Listeria_monocytogenes_1639_v73 | 0.9426 |
| Listeria_monocytogenes_serotype_1_2b_str_10-0810_1196163 | Listeria_monocytogenes_1639_v73 | 0.9426 |
| Listeria_monocytogenes_serotype_1_2a_str_99-6370_1196179 | Listeria_monocytogenes_1639_v73 | 0.9362 |
| Listeria_monocytogenes_serotype_1_2a_str_98-2035_1196178 | Listeria_monocytogenes_1639_v73 | 0.9362 |
| Listeria_monocytogenes_serotype_1_2a_str_95-0093_1196177 | Listeria_monocytogenes_1639_v73 | 0.9413 |
| Listeria_monocytogenes_serotype_1_2a_str_88-0478_1196176 | Listeria_monocytogenes_1639_v73 | 0.942  |
| Listeria_monocytogenes_serotype_1_2a_str_10-5024_1196192 | Listeria_monocytogenes_1639_v73 | 0.942  |
| Listeria_monocytogenes_serotype_1_2a_str_10-4758_1196168 | Listeria_monocytogenes_1639_v73 | 0.9523 |
| Listeria_monocytogenes_serotype_1_2a_str_10-4754_1196167 | Listeria_monocytogenes_1639_v73 | 0.9526 |
| Listeria_monocytogenes_serotype_1_2a_str_10-1321_1196191 | Listeria_monocytogenes_1639_v73 | 0.942  |
| Listeria_monocytogenes_serotype_1_2a_str_10-1047_1196190 | Listeria_monocytogenes_1639_v73 | 0.9416 |
| Listeria_monocytogenes_serotype_1_2a_str_10-1046_1196189 | Listeria_monocytogenes_1639_v73 | 0.9416 |
| Listeria_monocytogenes_serotype_1_2a_str_10-0934_1196170 | Listeria_monocytogenes_1639_v73 | 0.9501 |
| Listeria_monocytogenes_serotype_1_2a_str_10-0933_1196169 | Listeria_monocytogenes_1639_v73 | 0.9501 |
| Listeria_monocytogenes_serotype_1_2a_str_10-0815_1196188 | Listeria_monocytogenes_1639_v73 | 0.9376 |
| Listeria_monocytogenes_serotype_1_2a_str_10-0814_1196187 | Listeria_monocytogenes_1639_v73 | 0.942  |
| Listeria_monocytogenes_serotype_1_2a_str_10-0813_1196166 | Listeria_monocytogenes_1639_v73 | 0.954  |
| Listeria_monocytogenes_serotype_1_2a_str_10-0812_1196165 | Listeria_monocytogenes_1639_v73 | 0.954  |
| Listeria_monocytogenes_serotype_1_2a_str_08-7669_1196186 | Listeria_monocytogenes_1639_v73 | 0.9362 |
| Listeria_monocytogenes_serotype_1_2a_str_08-7374_1196185 | Listeria_monocytogenes_1639_v73 | 0.942  |
| Listeria_monocytogenes_serotype_1_2a_str_08-6997_1196184 | Listeria_monocytogenes_1639_v73 | 0.9376 |
| Listeria_monocytogenes_serotype_1_2a_str_08-6569_1196183 | Listeria_monocytogenes_1639_v73 | 0.9376 |
| Listeria_monocytogenes_serotype_1_2a_str_08-6056_1196182 | Listeria_monocytogenes_1639_v73 | 0.9376 |
| Listeria_monocytogenes_serotype_1_2a_str_04-5457_1196181 | Listeria_monocytogenes_1639_v73 | 0.942  |
| Listeria_monocytogenes_serotype_1_2a_str_02-5993_1196180 | Listeria_monocytogenes_1639_v73 | 0.942  |
| Listeria_monocytogenes_R479a_1437838                     | Listeria_monocytogenes_1639_v73 | 0.9527 |
| Listeria_monocytogenes_N53-1_1234142                     | Listeria_monocytogenes_1639_v73 | 0.9045 |
| Listeria_monocytogenes_M7_1030009                        | Listeria_monocytogenes_1639_v73 | 0.9099 |
| Listeria_monocytogenes_LO28_393132                       | Listeria_monocytogenes_1639_v73 | 0.9816 |
| Listeria_monocytogenes_L99_563174                        | Listeria_monocytogenes_1639_v73 | 0.9102 |
| Listeria_monocytogenes_L312_882094                       | Listeria_monocytogenes_1639_v73 | 0.9273 |
| Listeria_monocytogenes_J1816_930781                      | Listeria_monocytogenes_1639_v73 | 0.9156 |
| Listeria_monocytogenes_J1-220_930782                     | Listeria_monocytogenes_1639_v73 | 0.9255 |
| Listeria_monocytogenes_J0161_393130                      | Listeria_monocytogenes_1639_v73 | 0.941  |
| Listeria_monocytogenes_HCC23_552536                      | Listeria_monocytogenes_1639_v73 | 0.9095 |
| Listeria_monocytogenes_FSL_R2-561_393126                 | Listeria_monocytogenes_1639_v73 | 0.9742 |
| Listeria_monocytogenes_FSL_J1-208_393119                 | Listeria_monocytogenes_1639_v73 | 0.892  |
| Listeria_monocytogenes_FSL_J1-175_393118                 | Listeria_monocytogenes_1639_v73 | 0.9373 |
| Listeria_monocytogenes_Finland_1998_393127               | Listeria_monocytogenes_1639_v73 | 0.9437 |
| Listeria_monocytogenes_EGD-e_169963_v1                   | Listeria_monocytogenes_1639_v73 | 0.9683 |
| Listeria_monocytogenes_EGD-e_169963                      | Listeria_monocytogenes_1639_v73 | 0.9683 |
| Listeria_monocytogenes_EGD_1334565                       | Listeria_monocytogenes_1639_v73 | 0.9503 |
| Listeria_monocytogenes_CFSAN002349_1299895               | Listeria_monocytogenes_1639_v73 | 0.9279 |
| Listeria_monocytogenes_ATCC_19117_882095_v1              | Listeria_monocytogenes_1639_v73 | 0.9209 |
| Listeria_monocytogenes_ATCC_19117_882095                 | Listeria_monocytogenes_1639_v73 | 0.9205 |
| Listeria_monocytogenes_6179_1288295                      | Listeria_monocytogenes_1639_v73 | 0.9484 |
| Listeria_monocytogenes_1639_v9                           | Listeria_monocytogenes_1639_v73 | 0.9278 |
| Listeria_monocytogenes_1639_v99                          | Listeria_monocytogenes_1639_v73 | 0.9249 |
| Listeria_monocytogenes_1639_v98                          | Listeria_monocytogenes_1639_v73 | 0.9428 |
| Listeria_monocytogenes_1639_v97                          | Listeria_monocytogenes_1639_v73 | 0.9187 |
| Listeria_monocytogenes_1639_v96                          | Listeria_monocytogenes_1639_v73 | 0.9253 |
| Listeria_monocytogenes_1639_v95                          | Listeria_monocytogenes_1639_v73 | 0.9253 |
| Listeria_monocytogenes_1639_v94                          | Listeria_monocytogenes_1639_v73 | 0.9256 |
| Listeria_monocytogenes_1639_v93                          | Listeria_monocytogenes_1639_v73 | 0.9449 |
| Listeria_monocytogenes_1639_v92                          | Listeria_monocytogenes_1639_v73 | 0.9242 |
| Listeria_monocytogenes_1639_v91                          | Listeria_monocytogenes_1639_v73 | 0.9295 |
| Listeria_monocytogenes_1639_v90                          | Listeria_monocytogenes_1639_v73 | 0.9428 |
| Listeria_monocytogenes_1639_v8                           | Listeria_monocytogenes_1639_v73 | 0.9402 |
| Listeria_monocytogenes_1639_v89                          | Listeria_monocytogenes_1639_v73 | 0.9295 |
| Listeria_monocytogenes_1639_v88                          | Listeria_monocytogenes_1639_v73 | 0.9486 |
| Listeria_monocytogenes_1639_v87                          | Listeria_monocytogenes_1639_v73 | 0.9543 |
| Listeria_monocytogenes_1639_v86                          | Listeria_monocytogenes_1639_v73 | 0.9539 |
| Listeria_monocytogenes_1639_v85                          | Listeria_monocytogenes_1639_v73 | 0.9221 |
| Listeria_monocytogenes_1639_v84                          | Listeria_monocytogenes_1639_v73 | 0.9488 |
| Listeria_monocytogenes_1639_v83                          | Listeria_monocytogenes_1639_v73 | 0.9226 |
| Listeria_monocytogenes_1639_v82                          | Listeria_monocytogenes_1639_v73 | 0.9223 |
| Listeria_monocytogenes_1639_v81                          | Listeria_monocytogenes_1639_v73 | 0.9485 |
| Listeria_monocytogenes_1639_v80                          | Listeria_monocytogenes_1639_v73 | 0.9414 |
| Listeria_monocytogenes_1639_v7                           | Listeria_monocytogenes_1639_v73 | 0.9402 |
| Listeria_monocytogenes_1639_v79                          | Listeria_monocytogenes_1639_v73 | 0.9442 |
| Listeria_monocytogenes_1639_v78                          | Listeria_monocytogenes_1639_v73 | 0.9471 |
| Listeria_monocytogenes_1639_v77                          | Listeria_monocytogenes_1639_v73 | 0.9376 |
| Listeria_monocytogenes_1639_v76                          | Listeria_monocytogenes_1639_v73 | 0.9398 |
| Listeria_monocytogenes_1639_v75                          | Listeria_monocytogenes_1639_v73 | 0.9102 |
| Listeria_monocytogenes_1639_v74                          | Listeria_monocytogenes_1639_v73 | 0.9454 |
| Listeria_monocytogenes_1639_v73                          | Listeria_monocytogenes_1639_v73 | 0.0734 |
| Listeria_welshimeri_1643                                 | Listeria_monocytogenes_1639_v74 | 0.8615 |
| Listeria_welshimeri_serovar_6b_str_SLCC5334_386043       | Listeria_monocytogenes_1639_v74 | 0.8611 |
| Listeria_seeligeri_serovar_1_2b_str_SLCC3954_683837      | Listeria_monocytogenes_1639_v74 | 0.8722 |
| Listeria_seeligeri_FSL_S4-171_702452                     | Listeria_monocytogenes_1639_v74 | 0.8099 |
| Listeria_seeligeri_FSL_N1-067_702453                     | Listeria_monocytogenes_1639_v74 | 0.8455 |
| Listeria_seeligeri_1640_v1                               | Listeria_monocytogenes_1639_v74 | 0.8734 |
| Listeria_seeligeri_1640                                  | Listeria_monocytogenes_1639_v74 | 0.8725 |
| Listeria_monocytogenes_WSLC1042_1457188                  | Listeria_monocytogenes_1639_v74 | 0.9167 |
| Listeria_monocytogenes_WSLC1001_1457187                  | Listeria_monocytogenes_1639_v74 | 0.9578 |
| Listeria_monocytogenes_SLCC7179_879090                   | Listeria_monocytogenes_1639_v74 | 0.954  |

|                                                          |                                 |        |
|----------------------------------------------------------|---------------------------------|--------|
| Listeria_monocytogenes_SLCC5850_882096                   | Listeria_monocytogenes_1639_v74 | 0.9598 |
| Listeria_monocytogenes_SLCC2755_932919                   | Listeria_monocytogenes_1639_v74 | 0.9244 |
| Listeria_monocytogenes_SLCC2540_879089                   | Listeria_monocytogenes_1639_v74 | 0.9241 |
| Listeria_monocytogenes_SLCC2479_882020                   | Listeria_monocytogenes_1639_v74 | 0.9399 |
| Listeria_monocytogenes_SLCC2378_879088                   | Listeria_monocytogenes_1639_v74 | 0.9177 |
| Listeria_monocytogenes_SLCC2376_882097                   | Listeria_monocytogenes_1639_v74 | 0.9308 |
| Listeria_monocytogenes_SLCC2372_932920                   | Listeria_monocytogenes_1639_v74 | 0.9348 |
| Listeria_monocytogenes_serotype_4b_str_LL195_1230340     | Listeria_monocytogenes_1639_v74 | 0.9233 |
| Listeria_monocytogenes_serotype_4b_str_LIS0087_1134669   | Listeria_monocytogenes_1639_v74 | 0.9477 |
| Listeria_monocytogenes_serotype_4b_str_F2365_265669      | Listeria_monocytogenes_1639_v74 | 0.9233 |
| Listeria_monocytogenes_serotype_4b_str_CLIP_80459_568819 | Listeria_monocytogenes_1639_v74 | 0.9296 |
| Listeria_monocytogenes_serotype_4b_str_81-0861_1196161   | Listeria_monocytogenes_1639_v74 | 0.9182 |
| Listeria_monocytogenes_serotype_4b_str_81-0592_1196160   | Listeria_monocytogenes_1639_v74 | 0.9193 |
| Listeria_monocytogenes_serotype_4b_str_81-0558_1196159   | Listeria_monocytogenes_1639_v74 | 0.9196 |
| Listeria_monocytogenes_serotype_4b_str_10-0809_1196162   | Listeria_monocytogenes_1639_v74 | 0.9193 |
| Listeria_monocytogenes_serotype_4b_str_02-6680_1196175   | Listeria_monocytogenes_1639_v74 | 0.9286 |
| Listeria_monocytogenes_serotype_4b_str_02-6679_1196174   | Listeria_monocytogenes_1639_v74 | 0.9286 |
| Listeria_monocytogenes_serotype_4b_str_02-1792_1196173   | Listeria_monocytogenes_1639_v74 | 0.9186 |
| Listeria_monocytogenes_serotype_4b_str_02-1289_1196172   | Listeria_monocytogenes_1639_v74 | 0.9186 |
| Listeria_monocytogenes_serotype_4b_str_02-1103_1196171   | Listeria_monocytogenes_1639_v74 | 0.9186 |
| Listeria_monocytogenes_serotype_3c_str_10-5027_1196195   | Listeria_monocytogenes_1639_v74 | 0.9398 |
| Listeria_monocytogenes_serotype_1_2c_str_10-5026_1196194 | Listeria_monocytogenes_1639_v74 | 0.941  |
| Listeria_monocytogenes_serotype_1_2c_str_10-5025_1196193 | Listeria_monocytogenes_1639_v74 | 0.941  |
| Listeria_monocytogenes_serotype_1_2b_str_10-0811_1196164 | Listeria_monocytogenes_1639_v74 | 0.9253 |
| Listeria_monocytogenes_serotype_1_2b_str_10-0810_1196163 | Listeria_monocytogenes_1639_v74 | 0.9253 |
| Listeria_monocytogenes_serotype_1_2a_str_99-6370_1196179 | Listeria_monocytogenes_1639_v74 | 0.9304 |
| Listeria_monocytogenes_serotype_1_2a_str_98-2035_1196178 | Listeria_monocytogenes_1639_v74 | 0.9304 |
| Listeria_monocytogenes_serotype_1_2a_str_95-0093_1196177 | Listeria_monocytogenes_1639_v74 | 0.9355 |
| Listeria_monocytogenes_serotype_1_2a_str_88-0478_1196176 | Listeria_monocytogenes_1639_v74 | 0.9343 |
| Listeria_monocytogenes_serotype_1_2a_str_10-5024_1196192 | Listeria_monocytogenes_1639_v74 | 0.9355 |
| Listeria_monocytogenes_serotype_1_2a_str_10-4758_1196168 | Listeria_monocytogenes_1639_v74 | 0.9397 |
| Listeria_monocytogenes_serotype_1_2a_str_10-4754_1196167 | Listeria_monocytogenes_1639_v74 | 0.94   |
| Listeria_monocytogenes_serotype_1_2a_str_10-1321_1196191 | Listeria_monocytogenes_1639_v74 | 0.9355 |
| Listeria_monocytogenes_serotype_1_2a_str_10-1047_1196190 | Listeria_monocytogenes_1639_v74 | 0.9354 |
| Listeria_monocytogenes_serotype_1_2a_str_10-1046_1196189 | Listeria_monocytogenes_1639_v74 | 0.9354 |
| Listeria_monocytogenes_serotype_1_2a_str_10-0934_1196170 | Listeria_monocytogenes_1639_v74 | 0.9601 |
| Listeria_monocytogenes_serotype_1_2a_str_10-0933_1196169 | Listeria_monocytogenes_1639_v74 | 0.9601 |
| Listeria_monocytogenes_serotype_1_2a_str_10-0815_1196188 | Listeria_monocytogenes_1639_v74 | 0.9317 |
| Listeria_monocytogenes_serotype_1_2a_str_10-0814_1196187 | Listeria_monocytogenes_1639_v74 | 0.9358 |
| Listeria_monocytogenes_serotype_1_2a_str_10-0813_1196166 | Listeria_monocytogenes_1639_v74 | 0.9635 |
| Listeria_monocytogenes_serotype_1_2a_str_10-0812_1196165 | Listeria_monocytogenes_1639_v74 | 0.9635 |
| Listeria_monocytogenes_serotype_1_2a_str_08-7669_1196186 | Listeria_monocytogenes_1639_v74 | 0.9426 |
| Listeria_monocytogenes_serotype_1_2a_str_08-7374_1196185 | Listeria_monocytogenes_1639_v74 | 0.9355 |
| Listeria_monocytogenes_serotype_1_2a_str_08-6997_1196184 | Listeria_monocytogenes_1639_v74 | 0.9317 |
| Listeria_monocytogenes_serotype_1_2a_str_08-6569_1196183 | Listeria_monocytogenes_1639_v74 | 0.9317 |
| Listeria_monocytogenes_serotype_1_2a_str_08-6056_1196182 | Listeria_monocytogenes_1639_v74 | 0.9317 |
| Listeria_monocytogenes_serotype_1_2a_str_04-5457_1196181 | Listeria_monocytogenes_1639_v74 | 0.9355 |
| Listeria_monocytogenes_serotype_1_2a_str_02-5993_1196180 | Listeria_monocytogenes_1639_v74 | 0.9355 |
| Listeria_monocytogenes_R479a_1437838                     | Listeria_monocytogenes_1639_v74 | 0.9429 |
| Listeria_monocytogenes_N53-1_1234142                     | Listeria_monocytogenes_1639_v74 | 0.9019 |
| Listeria_monocytogenes_M7_1030009                        | Listeria_monocytogenes_1639_v74 | 0.8987 |
| Listeria_monocytogenes_LO28_393132                       | Listeria_monocytogenes_1639_v74 | 0.9448 |
| Listeria_monocytogenes_L99_563174                        | Listeria_monocytogenes_1639_v74 | 0.8991 |
| Listeria_monocytogenes_L312_882094                       | Listeria_monocytogenes_1639_v74 | 0.9296 |
| Listeria_monocytogenes_J1816_930781                      | Listeria_monocytogenes_1639_v74 | 0.9148 |
| Listeria_monocytogenes_J1-220_930782                     | Listeria_monocytogenes_1639_v74 | 0.9162 |
| Listeria_monocytogenes_J0161_393130                      | Listeria_monocytogenes_1639_v74 | 0.9429 |
| Listeria_monocytogenes_HCC23_552536                      | Listeria_monocytogenes_1639_v74 | 0.8987 |
| Listeria_monocytogenes_FSL_R2-561_393126                 | Listeria_monocytogenes_1639_v74 | 0.9381 |
| Listeria_monocytogenes_FSL_J1-208_393119                 | Listeria_monocytogenes_1639_v74 | 0.8993 |
| Listeria_monocytogenes_FSL_J1-175_393118                 | Listeria_monocytogenes_1639_v74 | 0.9261 |
| Listeria_monocytogenes_Finland_1998_393127               | Listeria_monocytogenes_1639_v74 | 0.9479 |
| Listeria_monocytogenes_EGD-e_169963_v1                   | Listeria_monocytogenes_1639_v74 | 0.9498 |
| Listeria_monocytogenes_EGD-e_169963                      | Listeria_monocytogenes_1639_v74 | 0.9502 |
| Listeria_monocytogenes_EGD_1334565                       | Listeria_monocytogenes_1639_v74 | 0.9606 |
| Listeria_monocytogenes_CFSAN002349_1299895               | Listeria_monocytogenes_1639_v74 | 0.9291 |
| Listeria_monocytogenes_ATCC_19117_882095_v1              | Listeria_monocytogenes_1639_v74 | 0.9243 |
| Listeria_monocytogenes_ATCC_19117_882095                 | Listeria_monocytogenes_1639_v74 | 0.9239 |
| Listeria_monocytogenes_6179_1288295                      | Listeria_monocytogenes_1639_v74 | 0.9353 |
| Listeria_monocytogenes_1639_v9                           | Listeria_monocytogenes_1639_v74 | 0.9121 |
| Listeria_monocytogenes_1639_v99                          | Listeria_monocytogenes_1639_v74 | 0.9193 |
| Listeria_monocytogenes_1639_v98                          | Listeria_monocytogenes_1639_v74 | 0.941  |
| Listeria_monocytogenes_1639_v97                          | Listeria_monocytogenes_1639_v74 | 0.9224 |
| Listeria_monocytogenes_1639_v96                          | Listeria_monocytogenes_1639_v74 | 0.9182 |
| Listeria_monocytogenes_1639_v95                          | Listeria_monocytogenes_1639_v74 | 0.9183 |
| Listeria_monocytogenes_1639_v94                          | Listeria_monocytogenes_1639_v74 | 0.9189 |
| Listeria_monocytogenes_1639_v93                          | Listeria_monocytogenes_1639_v74 | 0.9332 |
| Listeria_monocytogenes_1639_v92                          | Listeria_monocytogenes_1639_v74 | 0.9189 |
| Listeria_monocytogenes_1639_v91                          | Listeria_monocytogenes_1639_v74 | 0.9166 |
| Listeria_monocytogenes_1639_v90                          | Listeria_monocytogenes_1639_v74 | 0.941  |
| Listeria_monocytogenes_1639_v8                           | Listeria_monocytogenes_1639_v74 | 0.9282 |
| Listeria_monocytogenes_1639_v89                          | Listeria_monocytogenes_1639_v74 | 0.9307 |
| Listeria_monocytogenes_1639_v88                          | Listeria_monocytogenes_1639_v74 | 0.9464 |
| Listeria_monocytogenes_1639_v87                          | Listeria_monocytogenes_1639_v74 | 0.9618 |
| Listeria_monocytogenes_1639_v86                          | Listeria_monocytogenes_1639_v74 | 0.9626 |
| Listeria_monocytogenes_1639_v85                          | Listeria_monocytogenes_1639_v74 | 0.9165 |
| Listeria_monocytogenes_1639_v84                          | Listeria_monocytogenes_1639_v74 | 0.9396 |
| Listeria_monocytogenes_1639_v83                          | Listeria_monocytogenes_1639_v74 | 0.9229 |
| Listeria_monocytogenes_1639_v82                          | Listeria_monocytogenes_1639_v74 | 0.9226 |
| Listeria_monocytogenes_1639_v81                          | Listeria_monocytogenes_1639_v74 | 0.9371 |
| Listeria_monocytogenes_1639_v80                          | Listeria_monocytogenes_1639_v74 | 0.9265 |

|                                                          |                                 |        |
|----------------------------------------------------------|---------------------------------|--------|
| Listeria_monocytogenes_1639_v7                           | Listeria_monocytogenes_1639_v74 | 0.9282 |
| Listeria_monocytogenes_1639_v79                          | Listeria_monocytogenes_1639_v74 | 0.9354 |
| Listeria_monocytogenes_1639_v78                          | Listeria_monocytogenes_1639_v74 | 0.936  |
| Listeria_monocytogenes_1639_v77                          | Listeria_monocytogenes_1639_v74 | 0.9403 |
| Listeria_monocytogenes_1639_v76                          | Listeria_monocytogenes_1639_v74 | 0.9276 |
| Listeria_monocytogenes_1639_v75                          | Listeria_monocytogenes_1639_v74 | 0.8991 |
| Listeria_monocytogenes_1639_v74                          | Listeria_monocytogenes_1639_v74 | 0.0675 |
| Listeria_welshimeri_1643                                 | Listeria_monocytogenes_1639_v75 | 0.8657 |
| Listeria_welshimeri_serovar_6b_str_SLCC5334_386043       | Listeria_monocytogenes_1639_v75 | 0.865  |
| Listeria_seeligeri_serovar_1_2b_str_SLCC3954_683837      | Listeria_monocytogenes_1639_v75 | 0.8578 |
| Listeria_seeligeri_FSL_S4-171_702452                     | Listeria_monocytogenes_1639_v75 | 0.8083 |
| Listeria_seeligeri_FSL_N1-067_702453                     | Listeria_monocytogenes_1639_v75 | 0.8106 |
| Listeria_seeligeri_1640_v1                               | Listeria_monocytogenes_1639_v75 | 0.8527 |
| Listeria_seeligeri_1640                                  | Listeria_monocytogenes_1639_v75 | 0.8658 |
| Listeria_monocytogenes_WSLC1042_1457188                  | Listeria_monocytogenes_1639_v75 | 0.9045 |
| Listeria_monocytogenes_WSLC1001_1457187                  | Listeria_monocytogenes_1639_v75 | 0.912  |
| Listeria_monocytogenes_SLCC7179_879090                   | Listeria_monocytogenes_1639_v75 | 0.9093 |
| Listeria_monocytogenes_SLCC5850_882096                   | Listeria_monocytogenes_1639_v75 | 0.9134 |
| Listeria_monocytogenes_SLCC2755_932919                   | Listeria_monocytogenes_1639_v75 | 0.8953 |
| Listeria_monocytogenes_SLCC2540_879089                   | Listeria_monocytogenes_1639_v75 | 0.9108 |
| Listeria_monocytogenes_SLCC2479_882020                   | Listeria_monocytogenes_1639_v75 | 0.9082 |
| Listeria_monocytogenes_SLCC2378_879088                   | Listeria_monocytogenes_1639_v75 | 0.9059 |
| Listeria_monocytogenes_SLCC2376_882097                   | Listeria_monocytogenes_1639_v75 | 0.929  |
| Listeria_monocytogenes_SLCC2372_932920                   | Listeria_monocytogenes_1639_v75 | 0.9015 |
| Listeria_monocytogenes_serotype_4b_str_LL195_1230340     | Listeria_monocytogenes_1639_v75 | 0.9106 |
| Listeria_monocytogenes_serotype_4b_str_LIS0087_1134669   | Listeria_monocytogenes_1639_v75 | 0.8988 |
| Listeria_monocytogenes_serotype_4b_str_F2365_265669      | Listeria_monocytogenes_1639_v75 | 0.9106 |
| Listeria_monocytogenes_serotype_4b_str_CLIP_80459_568819 | Listeria_monocytogenes_1639_v75 | 0.9161 |
| Listeria_monocytogenes_serotype_4b_str_81-0861_1196161   | Listeria_monocytogenes_1639_v75 | 0.9092 |
| Listeria_monocytogenes_serotype_4b_str_81-0592_1196160   | Listeria_monocytogenes_1639_v75 | 0.9102 |
| Listeria_monocytogenes_serotype_4b_str_81-0558_1196159   | Listeria_monocytogenes_1639_v75 | 0.9109 |
| Listeria_monocytogenes_serotype_4b_str_10-0809_1196162   | Listeria_monocytogenes_1639_v75 | 0.9102 |
| Listeria_monocytogenes_serotype_4b_str_02-6680_1196175   | Listeria_monocytogenes_1639_v75 | 0.9099 |
| Listeria_monocytogenes_serotype_4b_str_02-6679_1196174   | Listeria_monocytogenes_1639_v75 | 0.9099 |
| Listeria_monocytogenes_serotype_4b_str_02-1792_1196173   | Listeria_monocytogenes_1639_v75 | 0.9113 |
| Listeria_monocytogenes_serotype_4b_str_02-1289_1196172   | Listeria_monocytogenes_1639_v75 | 0.9113 |
| Listeria_monocytogenes_serotype_4b_str_02-1103_1196171   | Listeria_monocytogenes_1639_v75 | 0.9113 |
| Listeria_monocytogenes_serotype_3c_str_10-5027_1196195   | Listeria_monocytogenes_1639_v75 | 0.9077 |
| Listeria_monocytogenes_serotype_1_2c_str_10-5026_1196194 | Listeria_monocytogenes_1639_v75 | 0.9081 |
| Listeria_monocytogenes_serotype_1_2c_str_10-5025_1196193 | Listeria_monocytogenes_1639_v75 | 0.9081 |
| Listeria_monocytogenes_serotype_1_2b_str_10-0811_1196164 | Listeria_monocytogenes_1639_v75 | 0.9155 |
| Listeria_monocytogenes_serotype_1_2b_str_10-0810_1196163 | Listeria_monocytogenes_1639_v75 | 0.9155 |
| Listeria_monocytogenes_serotype_1_2a_str_99-6370_1196179 | Listeria_monocytogenes_1639_v75 | 0.8969 |
| Listeria_monocytogenes_serotype_1_2a_str_98-2035_1196178 | Listeria_monocytogenes_1639_v75 | 0.8969 |
| Listeria_monocytogenes_serotype_1_2a_str_95-0093_1196177 | Listeria_monocytogenes_1639_v75 | 0.8989 |
| Listeria_monocytogenes_serotype_1_2a_str_88-0478_1196176 | Listeria_monocytogenes_1639_v75 | 0.8992 |
| Listeria_monocytogenes_serotype_1_2a_str_10-5024_1196192 | Listeria_monocytogenes_1639_v75 | 0.8999 |
| Listeria_monocytogenes_serotype_1_2a_str_10-4758_1196168 | Listeria_monocytogenes_1639_v75 | 0.9151 |
| Listeria_monocytogenes_serotype_1_2a_str_10-4754_1196167 | Listeria_monocytogenes_1639_v75 | 0.9151 |
| Listeria_monocytogenes_serotype_1_2a_str_10-1321_1196191 | Listeria_monocytogenes_1639_v75 | 0.8999 |
| Listeria_monocytogenes_serotype_1_2a_str_10-1047_1196190 | Listeria_monocytogenes_1639_v75 | 0.8999 |
| Listeria_monocytogenes_serotype_1_2a_str_10-1046_1196189 | Listeria_monocytogenes_1639_v75 | 0.8999 |
| Listeria_monocytogenes_serotype_1_2a_str_10-0934_1196170 | Listeria_monocytogenes_1639_v75 | 0.9087 |
| Listeria_monocytogenes_serotype_1_2a_str_10-0933_1196169 | Listeria_monocytogenes_1639_v75 | 0.9087 |
| Listeria_monocytogenes_serotype_1_2a_str_10-0815_1196188 | Listeria_monocytogenes_1639_v75 | 0.8968 |
| Listeria_monocytogenes_serotype_1_2a_str_10-0814_1196187 | Listeria_monocytogenes_1639_v75 | 0.9    |
| Listeria_monocytogenes_serotype_1_2a_str_10-0813_1196166 | Listeria_monocytogenes_1639_v75 | 0.9152 |
| Listeria_monocytogenes_serotype_1_2a_str_10-0812_1196165 | Listeria_monocytogenes_1639_v75 | 0.9152 |
| Listeria_monocytogenes_serotype_1_2a_str_08-7669_1196186 | Listeria_monocytogenes_1639_v75 | 0.896  |
| Listeria_monocytogenes_serotype_1_2a_str_08-7374_1196185 | Listeria_monocytogenes_1639_v75 | 0.8999 |
| Listeria_monocytogenes_serotype_1_2a_str_08-6997_1196184 | Listeria_monocytogenes_1639_v75 | 0.8968 |
| Listeria_monocytogenes_serotype_1_2a_str_08-6569_1196183 | Listeria_monocytogenes_1639_v75 | 0.8968 |
| Listeria_monocytogenes_serotype_1_2a_str_08-6056_1196182 | Listeria_monocytogenes_1639_v75 | 0.8968 |
| Listeria_monocytogenes_serotype_1_2a_str_04-5457_1196181 | Listeria_monocytogenes_1639_v75 | 0.8999 |
| Listeria_monocytogenes_serotype_1_2a_str_02-5993_1196180 | Listeria_monocytogenes_1639_v75 | 0.8996 |
| Listeria_monocytogenes_R479a_1437838                     | Listeria_monocytogenes_1639_v75 | 0.896  |
| Listeria_monocytogenes_N53-1_1234142                     | Listeria_monocytogenes_1639_v75 | 0.8683 |
| Listeria_monocytogenes_M7_1030009                        | Listeria_monocytogenes_1639_v75 | 0.9993 |
| Listeria_monocytogenes_LO28_393132                       | Listeria_monocytogenes_1639_v75 | 0.9123 |
| Listeria_monocytogenes_L99_563174                        | Listeria_monocytogenes_1639_v75 | 1      |
| Listeria_monocytogenes_L312_882094                       | Listeria_monocytogenes_1639_v75 | 0.9161 |
| Listeria_monocytogenes_J1816_930781                      | Listeria_monocytogenes_1639_v75 | 0.9002 |
| Listeria_monocytogenes_J1-220_930782                     | Listeria_monocytogenes_1639_v75 | 0.9142 |
| Listeria_monocytogenes_J0161_393130                      | Listeria_monocytogenes_1639_v75 | 0.9108 |
| Listeria_monocytogenes_HCC23_552536                      | Listeria_monocytogenes_1639_v75 | 0.9989 |
| Listeria_monocytogenes_FSL_R2-561_393126                 | Listeria_monocytogenes_1639_v75 | 0.9079 |
| Listeria_monocytogenes_FSL_J1-208_393119                 | Listeria_monocytogenes_1639_v75 | 0.8973 |
| Listeria_monocytogenes_FSL_J1-175_393118                 | Listeria_monocytogenes_1639_v75 | 0.912  |
| Listeria_monocytogenes_Finland_1998_393127               | Listeria_monocytogenes_1639_v75 | 0.9113 |
| Listeria_monocytogenes_EGD-e_169963_v1                   | Listeria_monocytogenes_1639_v75 | 0.9144 |
| Listeria_monocytogenes_EGD-e_169963                      | Listeria_monocytogenes_1639_v75 | 0.9148 |
| Listeria_monocytogenes_EGD_1334565                       | Listeria_monocytogenes_1639_v75 | 0.9141 |
| Listeria_monocytogenes_CFSAN002349_1299895               | Listeria_monocytogenes_1639_v75 | 0.9096 |
| Listeria_monocytogenes_ATCC_19117_882095_v1              | Listeria_monocytogenes_1639_v75 | 0.9072 |
| Listeria_monocytogenes_ATCC_19117_882095                 | Listeria_monocytogenes_1639_v75 | 0.9071 |
| Listeria_monocytogenes_6179_1288295                      | Listeria_monocytogenes_1639_v75 | 0.9092 |
| Listeria_monocytogenes_1639_v9                           | Listeria_monocytogenes_1639_v75 | 0.8993 |
| Listeria_monocytogenes_1639_v99                          | Listeria_monocytogenes_1639_v75 | 0.9036 |
| Listeria_monocytogenes_1639_v98                          | Listeria_monocytogenes_1639_v75 | 0.9093 |
| Listeria_monocytogenes_1639_v97                          | Listeria_monocytogenes_1639_v75 | 0.9058 |
| Listeria_monocytogenes_1639_v96                          | Listeria_monocytogenes_1639_v75 | 0.9011 |



|                                                          |                                 |        |
|----------------------------------------------------------|---------------------------------|--------|
| Listeria_monocytogenes_1639_v95                          | Listeria_monocytogenes_1639_v75 | 0.9011 |
| Listeria_monocytogenes_1639_v94                          | Listeria_monocytogenes_1639_v75 | 0.9014 |
| Listeria_monocytogenes_1639_v93                          | Listeria_monocytogenes_1639_v75 | 0.9003 |
| Listeria_monocytogenes_1639_v92                          | Listeria_monocytogenes_1639_v75 | 0.904  |
| Listeria_monocytogenes_1639_v91                          | Listeria_monocytogenes_1639_v75 | 0.9174 |
| Listeria_monocytogenes_1639_v90                          | Listeria_monocytogenes_1639_v75 | 0.9093 |
| Listeria_monocytogenes_1639_v8                           | Listeria_monocytogenes_1639_v75 | 0.891  |
| Listeria_monocytogenes_1639_v89                          | Listeria_monocytogenes_1639_v75 | 0.914  |
| Listeria_monocytogenes_1639_v88                          | Listeria_monocytogenes_1639_v75 | 0.9079 |
| Listeria_monocytogenes_1639_v87                          | Listeria_monocytogenes_1639_v75 | 0.9134 |
| Listeria_monocytogenes_1639_v86                          | Listeria_monocytogenes_1639_v75 | 0.9127 |
| Listeria_monocytogenes_1639_v85                          | Listeria_monocytogenes_1639_v75 | 0.9107 |
| Listeria_monocytogenes_1639_v84                          | Listeria_monocytogenes_1639_v75 | 0.9132 |
| Listeria_monocytogenes_1639_v83                          | Listeria_monocytogenes_1639_v75 | 0.9108 |
| Listeria_monocytogenes_1639_v82                          | Listeria_monocytogenes_1639_v75 | 0.9101 |
| Listeria_monocytogenes_1639_v81                          | Listeria_monocytogenes_1639_v75 | 0.9116 |
| Listeria_monocytogenes_1639_v80                          | Listeria_monocytogenes_1639_v75 | 0.9166 |
| Listeria_monocytogenes_1639_v7                           | Listeria_monocytogenes_1639_v75 | 0.891  |
| Listeria_monocytogenes_1639_v79                          | Listeria_monocytogenes_1639_v75 | 0.9081 |
| Listeria_monocytogenes_1639_v78                          | Listeria_monocytogenes_1639_v75 | 0.9109 |
| Listeria_monocytogenes_1639_v77                          | Listeria_monocytogenes_1639_v75 | 0.8957 |
| Listeria_monocytogenes_1639_v76                          | Listeria_monocytogenes_1639_v75 | 0.9031 |
| Listeria_monocytogenes_1639_v75                          | Listeria_monocytogenes_1639_v75 | 0.0666 |
| Listeria_welshimeri_1643                                 | Listeria_monocytogenes_1639_v76 | 0.8616 |
| Listeria_welshimeri_serovar_6b_str_SLCC5334_386043       | Listeria_monocytogenes_1639_v76 | 0.8613 |
| Listeria_seeligeri_serovar_1_2b_str_SLCC3954_683837      | Listeria_monocytogenes_1639_v76 | 0.8681 |
| Listeria_seeligeri_FSL_S4-171_702452                     | Listeria_monocytogenes_1639_v76 | 0.8075 |
| Listeria_seeligeri_FSL_N1-067_702453                     | Listeria_monocytogenes_1639_v76 | 0.8251 |
| Listeria_seeligeri_1640_v1                               | Listeria_monocytogenes_1639_v76 | 0.8678 |
| Listeria_seeligeri_1640                                  | Listeria_monocytogenes_1639_v76 | 0.8625 |
| Listeria_monocytogenes_WSLC1042_1457188                  | Listeria_monocytogenes_1639_v76 | 0.9185 |
| Listeria_monocytogenes_WSLC1001_1457187                  | Listeria_monocytogenes_1639_v76 | 0.9501 |
| Listeria_monocytogenes_SLCC7179_879090                   | Listeria_monocytogenes_1639_v76 | 0.9452 |
| Listeria_monocytogenes_SLCC5850_882096                   | Listeria_monocytogenes_1639_v76 | 0.9525 |
| Listeria_monocytogenes_SLCC2755_932919                   | Listeria_monocytogenes_1639_v76 | 0.9151 |
| Listeria_monocytogenes_SLCC2540_879089                   | Listeria_monocytogenes_1639_v76 | 0.9367 |
| Listeria_monocytogenes_SLCC2479_882020                   | Listeria_monocytogenes_1639_v76 | 0.9497 |
| Listeria_monocytogenes_SLCC2378_879088                   | Listeria_monocytogenes_1639_v76 | 0.9195 |
| Listeria_monocytogenes_SLCC2376_882097                   | Listeria_monocytogenes_1639_v76 | 0.9204 |
| Listeria_monocytogenes_SLCC2372_932920                   | Listeria_monocytogenes_1639_v76 | 0.9428 |
| Listeria_monocytogenes_serotype_4b_str_LL195_1230340     | Listeria_monocytogenes_1639_v76 | 0.9243 |
| Listeria_monocytogenes_serotype_4b_str_LIS0087_1134669   | Listeria_monocytogenes_1639_v76 | 0.9309 |
| Listeria_monocytogenes_serotype_4b_str_F2365_265669      | Listeria_monocytogenes_1639_v76 | 0.9243 |
| Listeria_monocytogenes_serotype_4b_str_CLIP_80459_568819 | Listeria_monocytogenes_1639_v76 | 0.9276 |
| Listeria_monocytogenes_serotype_4b_str_81-0861_1196161   | Listeria_monocytogenes_1639_v76 | 0.9148 |
| Listeria_monocytogenes_serotype_4b_str_81-0592_1196160   | Listeria_monocytogenes_1639_v76 | 0.9159 |
| Listeria_monocytogenes_serotype_4b_str_81-0558_1196159   | Listeria_monocytogenes_1639_v76 | 0.9155 |
| Listeria_monocytogenes_serotype_4b_str_10-0809_1196162   | Listeria_monocytogenes_1639_v76 | 0.9159 |
| Listeria_monocytogenes_serotype_4b_str_02-6680_1196175   | Listeria_monocytogenes_1639_v76 | 0.9262 |
| Listeria_monocytogenes_serotype_4b_str_02-6679_1196174   | Listeria_monocytogenes_1639_v76 | 0.9262 |
| Listeria_monocytogenes_serotype_4b_str_02-1792_1196173   | Listeria_monocytogenes_1639_v76 | 0.9181 |
| Listeria_monocytogenes_serotype_4b_str_02-1289_1196172   | Listeria_monocytogenes_1639_v76 | 0.9181 |
| Listeria_monocytogenes_serotype_4b_str_02-1103_1196171   | Listeria_monocytogenes_1639_v76 | 0.9181 |
| Listeria_monocytogenes_serotype_3c_str_10-5027_1196195   | Listeria_monocytogenes_1639_v76 | 0.9534 |
| Listeria_monocytogenes_serotype_1_2c_str_10-5026_1196194 | Listeria_monocytogenes_1639_v76 | 0.9534 |
| Listeria_monocytogenes_serotype_1_2c_str_10-5025_1196193 | Listeria_monocytogenes_1639_v76 | 0.9534 |
| Listeria_monocytogenes_serotype_1_2b_str_10-0811_1196164 | Listeria_monocytogenes_1639_v76 | 0.94   |
| Listeria_monocytogenes_serotype_1_2b_str_10-0810_1196163 | Listeria_monocytogenes_1639_v76 | 0.94   |
| Listeria_monocytogenes_serotype_1_2a_str_99-6370_1196179 | Listeria_monocytogenes_1639_v76 | 0.9511 |
| Listeria_monocytogenes_serotype_1_2a_str_98-2035_1196178 | Listeria_monocytogenes_1639_v76 | 0.9511 |
| Listeria_monocytogenes_serotype_1_2a_str_95-0093_1196177 | Listeria_monocytogenes_1639_v76 | 0.9449 |
| Listeria_monocytogenes_serotype_1_2a_str_88-0478_1196176 | Listeria_monocytogenes_1639_v76 | 0.9449 |
| Listeria_monocytogenes_serotype_1_2a_str_10-5024_1196192 | Listeria_monocytogenes_1639_v76 | 0.9453 |
| Listeria_monocytogenes_serotype_1_2a_str_10-4758_1196168 | Listeria_monocytogenes_1639_v76 | 0.9772 |
| Listeria_monocytogenes_serotype_1_2a_str_10-4754_1196167 | Listeria_monocytogenes_1639_v76 | 0.9772 |
| Listeria_monocytogenes_serotype_1_2a_str_10-1321_1196191 | Listeria_monocytogenes_1639_v76 | 0.9453 |
| Listeria_monocytogenes_serotype_1_2a_str_10-1047_1196190 | Listeria_monocytogenes_1639_v76 | 0.9452 |
| Listeria_monocytogenes_serotype_1_2a_str_10-1046_1196189 | Listeria_monocytogenes_1639_v76 | 0.9452 |
| Listeria_monocytogenes_serotype_1_2a_str_10-0934_1196170 | Listeria_monocytogenes_1639_v76 | 0.9497 |
| Listeria_monocytogenes_serotype_1_2a_str_10-0933_1196169 | Listeria_monocytogenes_1639_v76 | 0.9497 |
| Listeria_monocytogenes_serotype_1_2a_str_10-0815_1196188 | Listeria_monocytogenes_1639_v76 | 0.9492 |
| Listeria_monocytogenes_serotype_1_2a_str_10-0814_1196187 | Listeria_monocytogenes_1639_v76 | 0.9453 |
| Listeria_monocytogenes_serotype_1_2a_str_10-0813_1196166 | Listeria_monocytogenes_1639_v76 | 0.9477 |
| Listeria_monocytogenes_serotype_1_2a_str_10-0812_1196165 | Listeria_monocytogenes_1639_v76 | 0.9477 |
| Listeria_monocytogenes_serotype_1_2a_str_08-7669_1196186 | Listeria_monocytogenes_1639_v76 | 0.9421 |
| Listeria_monocytogenes_serotype_1_2a_str_08-7374_1196185 | Listeria_monocytogenes_1639_v76 | 0.9453 |
| Listeria_monocytogenes_serotype_1_2a_str_08-6997_1196184 | Listeria_monocytogenes_1639_v76 | 0.9492 |
| Listeria_monocytogenes_serotype_1_2a_str_08-6569_1196183 | Listeria_monocytogenes_1639_v76 | 0.9492 |
| Listeria_monocytogenes_serotype_1_2a_str_08-6056_1196182 | Listeria_monocytogenes_1639_v76 | 0.9492 |
| Listeria_monocytogenes_serotype_1_2a_str_04-5457_1196181 | Listeria_monocytogenes_1639_v76 | 0.9453 |
| Listeria_monocytogenes_serotype_1_2a_str_02-5993_1196180 | Listeria_monocytogenes_1639_v76 | 0.9453 |
| Listeria_monocytogenes_R479a_1437838                     | Listeria_monocytogenes_1639_v76 | 0.9416 |
| Listeria_monocytogenes_N53-1_1234142                     | Listeria_monocytogenes_1639_v76 | 0.8965 |
| Listeria_monocytogenes_M7_1030009                        | Listeria_monocytogenes_1639_v76 | 0.9028 |
| Listeria_monocytogenes_LO28_393132                       | Listeria_monocytogenes_1639_v76 | 0.9457 |
| Listeria_monocytogenes_L99_563174                        | Listeria_monocytogenes_1639_v76 | 0.9031 |
| Listeria_monocytogenes_L312_882094                       | Listeria_monocytogenes_1639_v76 | 0.9276 |
| Listeria_monocytogenes_J1816_930781                      | Listeria_monocytogenes_1639_v76 | 0.9199 |
| Listeria_monocytogenes_J1-220_930782                     | Listeria_monocytogenes_1639_v76 | 0.9202 |
| Listeria_monocytogenes_J0161_393130                      | Listeria_monocytogenes_1639_v76 | 0.9431 |
| Listeria_monocytogenes_HCC23_552536                      | Listeria_monocytogenes_1639_v76 | 0.9028 |

|                                                          |                                 |        |
|----------------------------------------------------------|---------------------------------|--------|
| Listeria_monocytogenes_FSL_R2-561_393126                 | Listeria_monocytogenes_1639_v76 | 0.9509 |
| Listeria_monocytogenes_FSL_J1-208_393119                 | Listeria_monocytogenes_1639_v76 | 0.8903 |
| Listeria_monocytogenes_FSL_J1-175_393118                 | Listeria_monocytogenes_1639_v76 | 0.9372 |
| Listeria_monocytogenes_Finland_1998_393127               | Listeria_monocytogenes_1639_v76 | 0.9463 |
| Listeria_monocytogenes_EGD-e_169963_v1                   | Listeria_monocytogenes_1639_v76 | 0.9441 |
| Listeria_monocytogenes_EGD-e_169963                      | Listeria_monocytogenes_1639_v76 | 0.9441 |
| Listeria_monocytogenes_EGD_1334565                       | Listeria_monocytogenes_1639_v76 | 0.9532 |
| Listeria_monocytogenes_CFSAN002349_1299895               | Listeria_monocytogenes_1639_v76 | 0.9263 |
| Listeria_monocytogenes_ATCC_19117_882095_v1              | Listeria_monocytogenes_1639_v76 | 0.9234 |
| Listeria_monocytogenes_ATCC_19117_882095                 | Listeria_monocytogenes_1639_v76 | 0.923  |
| Listeria_monocytogenes_6179_1288295                      | Listeria_monocytogenes_1639_v76 | 0.9432 |
| Listeria_monocytogenes_1639_v9                           | Listeria_monocytogenes_1639_v76 | 0.927  |
| Listeria_monocytogenes_1639_v99                          | Listeria_monocytogenes_1639_v76 | 0.9207 |
| Listeria_monocytogenes_1639_v98                          | Listeria_monocytogenes_1639_v76 | 0.9494 |
| Listeria_monocytogenes_1639_v97                          | Listeria_monocytogenes_1639_v76 | 0.9275 |
| Listeria_monocytogenes_1639_v96                          | Listeria_monocytogenes_1639_v76 | 0.92   |
| Listeria_monocytogenes_1639_v95                          | Listeria_monocytogenes_1639_v76 | 0.92   |
| Listeria_monocytogenes_1639_v94                          | Listeria_monocytogenes_1639_v76 | 0.9204 |
| Listeria_monocytogenes_1639_v93                          | Listeria_monocytogenes_1639_v76 | 0.9404 |
| Listeria_monocytogenes_1639_v92                          | Listeria_monocytogenes_1639_v76 | 0.9204 |
| Listeria_monocytogenes_1639_v91                          | Listeria_monocytogenes_1639_v76 | 0.9221 |
| Listeria_monocytogenes_1639_v90                          | Listeria_monocytogenes_1639_v76 | 0.9494 |
| Listeria_monocytogenes_1639_v8                           | Listeria_monocytogenes_1639_v76 | 0.9328 |
| Listeria_monocytogenes_1639_v89                          | Listeria_monocytogenes_1639_v76 | 0.9257 |
| Listeria_monocytogenes_1639_v88                          | Listeria_monocytogenes_1639_v76 | 0.9552 |
| Listeria_monocytogenes_1639_v87                          | Listeria_monocytogenes_1639_v76 | 0.9457 |
| Listeria_monocytogenes_1639_v86                          | Listeria_monocytogenes_1639_v76 | 0.9457 |
| Listeria_monocytogenes_1639_v85                          | Listeria_monocytogenes_1639_v76 | 0.9157 |
| Listeria_monocytogenes_1639_v84                          | Listeria_monocytogenes_1639_v76 | 0.9602 |
| Listeria_monocytogenes_1639_v83                          | Listeria_monocytogenes_1639_v76 | 0.9199 |
| Listeria_monocytogenes_1639_v82                          | Listeria_monocytogenes_1639_v76 | 0.9192 |
| Listeria_monocytogenes_1639_v81                          | Listeria_monocytogenes_1639_v76 | 0.9525 |
| Listeria_monocytogenes_1639_v80                          | Listeria_monocytogenes_1639_v76 | 0.9387 |
| Listeria_monocytogenes_1639_v7                           | Listeria_monocytogenes_1639_v76 | 0.9328 |
| Listeria_monocytogenes_1639_v79                          | Listeria_monocytogenes_1639_v76 | 0.95   |
| Listeria_monocytogenes_1639_v78                          | Listeria_monocytogenes_1639_v76 | 0.9537 |
| Listeria_monocytogenes_1639_v77                          | Listeria_monocytogenes_1639_v76 | 0.9408 |
| Listeria_monocytogenes_1639_v76                          | Listeria_monocytogenes_1639_v76 | 0.067  |
| Listeria_welshimeri_1643                                 | Listeria_monocytogenes_1639_v77 | 0.8711 |
| Listeria_welshimeri_serovar_6b_str_SLCC5334_386043       | Listeria_monocytogenes_1639_v77 | 0.8708 |
| Listeria_seeligeri_serovar_1_2b_str_SLCC3954_683837      | Listeria_monocytogenes_1639_v77 | 0.8793 |
| Listeria_seeligeri_FSL_S4-171_702452                     | Listeria_monocytogenes_1639_v77 | 0.8201 |
| Listeria_seeligeri_FSL_N1-067_702453                     | Listeria_monocytogenes_1639_v77 | 0.8352 |
| Listeria_seeligeri_1640_v1                               | Listeria_monocytogenes_1639_v77 | 0.8801 |
| Listeria_seeligeri_1640                                  | Listeria_monocytogenes_1639_v77 | 0.8738 |
| Listeria_monocytogenes_WSLC1042_1457188                  | Listeria_monocytogenes_1639_v77 | 0.9289 |
| Listeria_monocytogenes_WSLC1001_1457187                  | Listeria_monocytogenes_1639_v77 | 0.945  |
| Listeria_monocytogenes_SLCC7179_879090                   | Listeria_monocytogenes_1639_v77 | 0.9563 |
| Listeria_monocytogenes_SLCC5850_882096                   | Listeria_monocytogenes_1639_v77 | 0.9478 |
| Listeria_monocytogenes_SLCC2755_932919                   | Listeria_monocytogenes_1639_v77 | 0.9246 |
| Listeria_monocytogenes_SLCC2540_879089                   | Listeria_monocytogenes_1639_v77 | 0.9348 |
| Listeria_monocytogenes_SLCC2479_882020                   | Listeria_monocytogenes_1639_v77 | 0.9484 |
| Listeria_monocytogenes_SLCC2378_879088                   | Listeria_monocytogenes_1639_v77 | 0.93   |
| Listeria_monocytogenes_SLCC2376_882097                   | Listeria_monocytogenes_1639_v77 | 0.9322 |
| Listeria_monocytogenes_SLCC2372_932920                   | Listeria_monocytogenes_1639_v77 | 0.9417 |
| Listeria_monocytogenes_serotype_4b_str_LL195_1230340     | Listeria_monocytogenes_1639_v77 | 0.9322 |
| Listeria_monocytogenes_serotype_4b_str_LIS0087_1134669   | Listeria_monocytogenes_1639_v77 | 0.9271 |
| Listeria_monocytogenes_serotype_4b_str_F2365_265669      | Listeria_monocytogenes_1639_v77 | 0.9322 |
| Listeria_monocytogenes_serotype_4b_str_CLIP_80459_568819 | Listeria_monocytogenes_1639_v77 | 0.9321 |
| Listeria_monocytogenes_serotype_4b_str_81-0861_1196161   | Listeria_monocytogenes_1639_v77 | 0.9247 |
| Listeria_monocytogenes_serotype_4b_str_81-0592_1196160   | Listeria_monocytogenes_1639_v77 | 0.9258 |
| Listeria_monocytogenes_serotype_4b_str_81-0558_1196159   | Listeria_monocytogenes_1639_v77 | 0.9258 |
| Listeria_monocytogenes_serotype_4b_str_10-0809_1196162   | Listeria_monocytogenes_1639_v77 | 0.9258 |
| Listeria_monocytogenes_serotype_4b_str_02-6680_1196175   | Listeria_monocytogenes_1639_v77 | 0.9307 |
| Listeria_monocytogenes_serotype_4b_str_02-6679_1196174   | Listeria_monocytogenes_1639_v77 | 0.9307 |
| Listeria_monocytogenes_serotype_4b_str_02-1792_1196173   | Listeria_monocytogenes_1639_v77 | 0.9262 |
| Listeria_monocytogenes_serotype_4b_str_02-1289_1196172   | Listeria_monocytogenes_1639_v77 | 0.9262 |
| Listeria_monocytogenes_serotype_4b_str_02-1103_1196171   | Listeria_monocytogenes_1639_v77 | 0.9262 |
| Listeria_monocytogenes_serotype_3c_str_10-5027_1196195   | Listeria_monocytogenes_1639_v77 | 0.948  |
| Listeria_monocytogenes_serotype_1_2c_str_10-5026_1196194 | Listeria_monocytogenes_1639_v77 | 0.9488 |
| Listeria_monocytogenes_serotype_1_2c_str_10-5025_1196193 | Listeria_monocytogenes_1639_v77 | 0.9488 |
| Listeria_monocytogenes_serotype_1_2b_str_10-0811_1196164 | Listeria_monocytogenes_1639_v77 | 0.9259 |
| Listeria_monocytogenes_serotype_1_2b_str_10-0810_1196163 | Listeria_monocytogenes_1639_v77 | 0.9259 |
| Listeria_monocytogenes_serotype_1_2a_str_99-6370_1196179 | Listeria_monocytogenes_1639_v77 | 0.9413 |
| Listeria_monocytogenes_serotype_1_2a_str_98-2035_1196178 | Listeria_monocytogenes_1639_v77 | 0.9413 |
| Listeria_monocytogenes_serotype_1_2a_str_95-0093_1196177 | Listeria_monocytogenes_1639_v77 | 0.9473 |
| Listeria_monocytogenes_serotype_1_2a_str_88-0478_1196176 | Listeria_monocytogenes_1639_v77 | 0.9461 |
| Listeria_monocytogenes_serotype_1_2a_str_10-5024_1196192 | Listeria_monocytogenes_1639_v77 | 0.9473 |
| Listeria_monocytogenes_serotype_1_2a_str_10-4758_1196168 | Listeria_monocytogenes_1639_v77 | 0.9464 |
| Listeria_monocytogenes_serotype_1_2a_str_10-4754_1196167 | Listeria_monocytogenes_1639_v77 | 0.9467 |
| Listeria_monocytogenes_serotype_1_2a_str_10-1321_1196191 | Listeria_monocytogenes_1639_v77 | 0.9473 |
| Listeria_monocytogenes_serotype_1_2a_str_10-1047_1196190 | Listeria_monocytogenes_1639_v77 | 0.9472 |
| Listeria_monocytogenes_serotype_1_2a_str_10-1046_1196189 | Listeria_monocytogenes_1639_v77 | 0.9472 |
| Listeria_monocytogenes_serotype_1_2a_str_10-0934_1196170 | Listeria_monocytogenes_1639_v77 | 0.9575 |
| Listeria_monocytogenes_serotype_1_2a_str_10-0933_1196169 | Listeria_monocytogenes_1639_v77 | 0.9575 |
| Listeria_monocytogenes_serotype_1_2a_str_10-0815_1196188 | Listeria_monocytogenes_1639_v77 | 0.9427 |
| Listeria_monocytogenes_serotype_1_2a_str_10-0814_1196187 | Listeria_monocytogenes_1639_v77 | 0.9473 |
| Listeria_monocytogenes_serotype_1_2a_str_10-0813_1196166 | Listeria_monocytogenes_1639_v77 | 0.9463 |
| Listeria_monocytogenes_serotype_1_2a_str_10-0812_1196165 | Listeria_monocytogenes_1639_v77 | 0.9463 |
| Listeria_monocytogenes_serotype_1_2a_str_08-7669_1196186 | Listeria_monocytogenes_1639_v77 | 0.955  |
| Listeria_monocytogenes_serotype_1_2a_str_08-7374_1196185 | Listeria_monocytogenes_1639_v77 | 0.9473 |

|                                                          |                                 |        |
|----------------------------------------------------------|---------------------------------|--------|
| Listeria_monocytogenes_serotype_1_2a_str_08-6997_1196184 | Listeria_monocytogenes_1639_v77 | 0.9427 |
| Listeria_monocytogenes_serotype_1_2a_str_08-6569_1196183 | Listeria_monocytogenes_1639_v77 | 0.9427 |
| Listeria_monocytogenes_serotype_1_2a_str_08-6056_1196182 | Listeria_monocytogenes_1639_v77 | 0.9427 |
| Listeria_monocytogenes_serotype_1_2a_str_04-5457_1196181 | Listeria_monocytogenes_1639_v77 | 0.9473 |
| Listeria_monocytogenes_serotype_1_2a_str_02-5993_1196180 | Listeria_monocytogenes_1639_v77 | 0.9473 |
| Listeria_monocytogenes_R479a_1437838                     | Listeria_monocytogenes_1639_v77 | 0.9447 |
| Listeria_monocytogenes_N53-1_1234142                     | Listeria_monocytogenes_1639_v77 | 0.9037 |
| Listeria_monocytogenes_M7_1030009                        | Listeria_monocytogenes_1639_v77 | 0.8954 |
| Listeria_monocytogenes_LO28_393132                       | Listeria_monocytogenes_1639_v77 | 0.9417 |
| Listeria_monocytogenes_L99_563174                        | Listeria_monocytogenes_1639_v77 | 0.8957 |
| Listeria_monocytogenes_L312_882094                       | Listeria_monocytogenes_1639_v77 | 0.9321 |
| Listeria_monocytogenes_J1816_930781                      | Listeria_monocytogenes_1639_v77 | 0.925  |
| Listeria_monocytogenes_J1-220_930782                     | Listeria_monocytogenes_1639_v77 | 0.9204 |
| Listeria_monocytogenes_J0161_393130                      | Listeria_monocytogenes_1639_v77 | 0.9533 |
| Listeria_monocytogenes_HCC23_552536                      | Listeria_monocytogenes_1639_v77 | 0.8954 |
| Listeria_monocytogenes_FSL_R2-561_393126                 | Listeria_monocytogenes_1639_v77 | 0.9458 |
| Listeria_monocytogenes_FSL_J1-208_393119                 | Listeria_monocytogenes_1639_v77 | 0.9005 |
| Listeria_monocytogenes_FSL_J1-175_393118                 | Listeria_monocytogenes_1639_v77 | 0.9331 |
| Listeria_monocytogenes_Finland_1998_393127               | Listeria_monocytogenes_1639_v77 | 0.9564 |
| Listeria_monocytogenes_EGD-e_169963_v1                   | Listeria_monocytogenes_1639_v77 | 0.9547 |
| Listeria_monocytogenes_EGD-e_169963                      | Listeria_monocytogenes_1639_v77 | 0.9547 |
| Listeria_monocytogenes_EGD_1334565                       | Listeria_monocytogenes_1639_v77 | 0.9485 |
| Listeria_monocytogenes_CFSAN002349_1299895               | Listeria_monocytogenes_1639_v77 | 0.9335 |
| Listeria_monocytogenes_ATCC_19117_882095_v1              | Listeria_monocytogenes_1639_v77 | 0.932  |
| Listeria_monocytogenes_ATCC_19117_882095                 | Listeria_monocytogenes_1639_v77 | 0.9317 |
| Listeria_monocytogenes_6179_1288295                      | Listeria_monocytogenes_1639_v77 | 0.9389 |
| Listeria_monocytogenes_1639_v9                           | Listeria_monocytogenes_1639_v77 | 0.9163 |
| Listeria_monocytogenes_1639_v99                          | Listeria_monocytogenes_1639_v77 | 0.9269 |
| Listeria_monocytogenes_1639_v98                          | Listeria_monocytogenes_1639_v77 | 0.9462 |
| Listeria_monocytogenes_1639_v97                          | Listeria_monocytogenes_1639_v77 | 0.9338 |
| Listeria_monocytogenes_1639_v96                          | Listeria_monocytogenes_1639_v77 | 0.9258 |
| Listeria_monocytogenes_1639_v95                          | Listeria_monocytogenes_1639_v77 | 0.9259 |
| Listeria_monocytogenes_1639_v94                          | Listeria_monocytogenes_1639_v77 | 0.9265 |
| Listeria_monocytogenes_1639_v93                          | Listeria_monocytogenes_1639_v77 | 0.9364 |
| Listeria_monocytogenes_1639_v92                          | Listeria_monocytogenes_1639_v77 | 0.9262 |
| Listeria_monocytogenes_1639_v91                          | Listeria_monocytogenes_1639_v77 | 0.9216 |
| Listeria_monocytogenes_1639_v90                          | Listeria_monocytogenes_1639_v77 | 0.9462 |
| Listeria_monocytogenes_1639_v8                           | Listeria_monocytogenes_1639_v77 | 0.9332 |
| Listeria_monocytogenes_1639_v89                          | Listeria_monocytogenes_1639_v77 | 0.9354 |
| Listeria_monocytogenes_1639_v88                          | Listeria_monocytogenes_1639_v77 | 0.9539 |
| Listeria_monocytogenes_1639_v87                          | Listeria_monocytogenes_1639_v77 | 0.9425 |
| Listeria_monocytogenes_1639_v86                          | Listeria_monocytogenes_1639_v77 | 0.9425 |
| Listeria_monocytogenes_1639_v85                          | Listeria_monocytogenes_1639_v77 | 0.9245 |
| Listeria_monocytogenes_1639_v84                          | Listeria_monocytogenes_1639_v77 | 0.9545 |
| Listeria_monocytogenes_1639_v83                          | Listeria_monocytogenes_1639_v77 | 0.9253 |
| Listeria_monocytogenes_1639_v82                          | Listeria_monocytogenes_1639_v77 | 0.925  |
| Listeria_monocytogenes_1639_v81                          | Listeria_monocytogenes_1639_v77 | 0.9524 |
| Listeria_monocytogenes_1639_v80                          | Listeria_monocytogenes_1639_v77 | 0.9275 |
| Listeria_monocytogenes_1639_v7                           | Listeria_monocytogenes_1639_v77 | 0.9332 |
| Listeria_monocytogenes_1639_v79                          | Listeria_monocytogenes_1639_v77 | 0.951  |
| Listeria_monocytogenes_1639_v78                          | Listeria_monocytogenes_1639_v77 | 0.9524 |
| Listeria_monocytogenes_1639_v77                          | Listeria_monocytogenes_1639_v77 | 0.0685 |
| Listeria_welshimeri_1643                                 | Listeria_monocytogenes_1639_v78 | 0.8693 |
| Listeria_welshimeri_serovar_6b_str_SLCC5334_386043       | Listeria_monocytogenes_1639_v78 | 0.8686 |
| Listeria_seeligeri_serovar_1_2b_str_SLCC3954_683837      | Listeria_monocytogenes_1639_v78 | 0.8794 |
| Listeria_seeligeri_FSL_S4-171_702452                     | Listeria_monocytogenes_1639_v78 | 0.8196 |
| Listeria_seeligeri_FSL_N1-067_702453                     | Listeria_monocytogenes_1639_v78 | 0.8453 |
| Listeria_seeligeri_1640_v1                               | Listeria_monocytogenes_1639_v78 | 0.876  |
| Listeria_seeligeri_1640                                  | Listeria_monocytogenes_1639_v78 | 0.8765 |
| Listeria_monocytogenes_WSLC1042_1457188                  | Listeria_monocytogenes_1639_v78 | 0.9213 |
| Listeria_monocytogenes_WSLC1001_1457187                  | Listeria_monocytogenes_1639_v78 | 0.9539 |
| Listeria_monocytogenes_SLCC7179_879090                   | Listeria_monocytogenes_1639_v78 | 0.9531 |
| Listeria_monocytogenes_SLCC5850_882096                   | Listeria_monocytogenes_1639_v78 | 0.9548 |
| Listeria_monocytogenes_SLCC2755_932919                   | Listeria_monocytogenes_1639_v78 | 0.9256 |
| Listeria_monocytogenes_SLCC2540_879089                   | Listeria_monocytogenes_1639_v78 | 0.9418 |
| Listeria_monocytogenes_SLCC2479_882020                   | Listeria_monocytogenes_1639_v78 | 0.9594 |
| Listeria_monocytogenes_SLCC2378_879088                   | Listeria_monocytogenes_1639_v78 | 0.9227 |
| Listeria_monocytogenes_SLCC2376_882097                   | Listeria_monocytogenes_1639_v78 | 0.929  |
| Listeria_monocytogenes_SLCC2372_932920                   | Listeria_monocytogenes_1639_v78 | 0.952  |
| Listeria_monocytogenes_serotype_4b_str_LL195_1230340     | Listeria_monocytogenes_1639_v78 | 0.9279 |
| Listeria_monocytogenes_serotype_4b_str_LIS0087_1134669   | Listeria_monocytogenes_1639_v78 | 0.9335 |
| Listeria_monocytogenes_serotype_4b_str_F2365_265669      | Listeria_monocytogenes_1639_v78 | 0.9279 |
| Listeria_monocytogenes_serotype_4b_str_CLIP_80459_568819 | Listeria_monocytogenes_1639_v78 | 0.9339 |
| Listeria_monocytogenes_serotype_4b_str_81-0861_1196161   | Listeria_monocytogenes_1639_v78 | 0.9187 |
| Listeria_monocytogenes_serotype_4b_str_81-0592_1196160   | Listeria_monocytogenes_1639_v78 | 0.9198 |
| Listeria_monocytogenes_serotype_4b_str_81-0558_1196159   | Listeria_monocytogenes_1639_v78 | 0.9205 |
| Listeria_monocytogenes_serotype_4b_str_10-0809_1196162   | Listeria_monocytogenes_1639_v78 | 0.9198 |
| Listeria_monocytogenes_serotype_4b_str_02-6680_1196175   | Listeria_monocytogenes_1639_v78 | 0.9333 |
| Listeria_monocytogenes_serotype_4b_str_02-6679_1196174   | Listeria_monocytogenes_1639_v78 | 0.9333 |
| Listeria_monocytogenes_serotype_4b_str_02-1792_1196173   | Listeria_monocytogenes_1639_v78 | 0.9212 |
| Listeria_monocytogenes_serotype_4b_str_02-1289_1196172   | Listeria_monocytogenes_1639_v78 | 0.9212 |
| Listeria_monocytogenes_serotype_4b_str_02-1103_1196171   | Listeria_monocytogenes_1639_v78 | 0.9212 |
| Listeria_monocytogenes_serotype_3c_str_10-5027_1196195   | Listeria_monocytogenes_1639_v78 | 0.9616 |
| Listeria_monocytogenes_serotype_1_2c_str_10-5026_1196194 | Listeria_monocytogenes_1639_v78 | 0.9624 |
| Listeria_monocytogenes_serotype_1_2c_str_10-5025_1196193 | Listeria_monocytogenes_1639_v78 | 0.9624 |
| Listeria_monocytogenes_serotype_1_2b_str_10-0811_1196164 | Listeria_monocytogenes_1639_v78 | 0.9395 |
| Listeria_monocytogenes_serotype_1_2b_str_10-0810_1196163 | Listeria_monocytogenes_1639_v78 | 0.9395 |
| Listeria_monocytogenes_serotype_1_2a_str_99-6370_1196179 | Listeria_monocytogenes_1639_v78 | 0.9555 |
| Listeria_monocytogenes_serotype_1_2a_str_98-2035_1196178 | Listeria_monocytogenes_1639_v78 | 0.9555 |
| Listeria_monocytogenes_serotype_1_2a_str_95-0093_1196177 | Listeria_monocytogenes_1639_v78 | 0.9615 |
| Listeria_monocytogenes_serotype_1_2a_str_88-0478_1196176 | Listeria_monocytogenes_1639_v78 | 0.9604 |

|                                                          |                                 |        |
|----------------------------------------------------------|---------------------------------|--------|
| Listeria_monocytogenes_serotype_1_2a_str_10-5024_1196192 | Listeria_monocytogenes_1639_v78 | 0.9615 |
| Listeria_monocytogenes_serotype_1_2a_str_10-4758_1196168 | Listeria_monocytogenes_1639_v78 | 0.9586 |
| Listeria_monocytogenes_serotype_1_2a_str_10-4754_1196167 | Listeria_monocytogenes_1639_v78 | 0.9586 |
| Listeria_monocytogenes_serotype_1_2a_str_10-1321_1196191 | Listeria_monocytogenes_1639_v78 | 0.9615 |
| Listeria_monocytogenes_serotype_1_2a_str_10-1047_1196190 | Listeria_monocytogenes_1639_v78 | 0.9608 |
| Listeria_monocytogenes_serotype_1_2a_str_10-1046_1196189 | Listeria_monocytogenes_1639_v78 | 0.9608 |
| Listeria_monocytogenes_serotype_1_2a_str_10-0934_1196170 | Listeria_monocytogenes_1639_v78 | 0.9516 |
| Listeria_monocytogenes_serotype_1_2a_str_10-0933_1196169 | Listeria_monocytogenes_1639_v78 | 0.9516 |
| Listeria_monocytogenes_serotype_1_2a_str_10-0815_1196188 | Listeria_monocytogenes_1639_v78 | 0.9566 |
| Listeria_monocytogenes_serotype_1_2a_str_10-0814_1196187 | Listeria_monocytogenes_1639_v78 | 0.9612 |
| Listeria_monocytogenes_serotype_1_2a_str_10-0813_1196166 | Listeria_monocytogenes_1639_v78 | 0.9551 |
| Listeria_monocytogenes_serotype_1_2a_str_10-0812_1196165 | Listeria_monocytogenes_1639_v78 | 0.9551 |
| Listeria_monocytogenes_serotype_1_2a_str_08-7669_1196186 | Listeria_monocytogenes_1639_v78 | 0.9555 |
| Listeria_monocytogenes_serotype_1_2a_str_08-7374_1196185 | Listeria_monocytogenes_1639_v78 | 0.9615 |
| Listeria_monocytogenes_serotype_1_2a_str_08-6997_1196184 | Listeria_monocytogenes_1639_v78 | 0.9566 |
| Listeria_monocytogenes_serotype_1_2a_str_08-6569_1196183 | Listeria_monocytogenes_1639_v78 | 0.9566 |
| Listeria_monocytogenes_serotype_1_2a_str_08-6056_1196182 | Listeria_monocytogenes_1639_v78 | 0.9566 |
| Listeria_monocytogenes_serotype_1_2a_str_04-5457_1196181 | Listeria_monocytogenes_1639_v78 | 0.9615 |
| Listeria_monocytogenes_serotype_1_2a_str_02-5993_1196180 | Listeria_monocytogenes_1639_v78 | 0.9612 |
| Listeria_monocytogenes_R479a_1437838                     | Listeria_monocytogenes_1639_v78 | 0.9597 |
| Listeria_monocytogenes_N53-1_1234142                     | Listeria_monocytogenes_1639_v78 | 0.9005 |
| Listeria_monocytogenes_M7_1030009                        | Listeria_monocytogenes_1639_v78 | 0.9102 |
| Listeria_monocytogenes_LO28_393132                       | Listeria_monocytogenes_1639_v78 | 0.9528 |
| Listeria_monocytogenes_L99_563174                        | Listeria_monocytogenes_1639_v78 | 0.9109 |
| Listeria_monocytogenes_L312_882094                       | Listeria_monocytogenes_1639_v78 | 0.9339 |
| Listeria_monocytogenes_J1816_930781                      | Listeria_monocytogenes_1639_v78 | 0.9253 |
| Listeria_monocytogenes_J1-220_930782                     | Listeria_monocytogenes_1639_v78 | 0.9263 |
| Listeria_monocytogenes_J0161_393130                      | Listeria_monocytogenes_1639_v78 | 0.9528 |
| Listeria_monocytogenes_HCC23_552536                      | Listeria_monocytogenes_1639_v78 | 0.9106 |
| Listeria_monocytogenes_FSL_R2-561_393126                 | Listeria_monocytogenes_1639_v78 | 0.9621 |
| Listeria_monocytogenes_FSL_J1-208_393119                 | Listeria_monocytogenes_1639_v78 | 0.8941 |
| Listeria_monocytogenes_FSL_J1-175_393118                 | Listeria_monocytogenes_1639_v78 | 0.942  |
| Listeria_monocytogenes_Finland_1998_393127               | Listeria_monocytogenes_1639_v78 | 0.9756 |
| Listeria_monocytogenes_EGD-e_169963_v1                   | Listeria_monocytogenes_1639_v78 | 0.9482 |
| Listeria_monocytogenes_EGD-e_169963                      | Listeria_monocytogenes_1639_v78 | 0.9482 |
| Listeria_monocytogenes_EGD_1334565                       | Listeria_monocytogenes_1639_v78 | 0.9555 |
| Listeria_monocytogenes_CFSAN002349_1299895               | Listeria_monocytogenes_1639_v78 | 0.9334 |
| Listeria_monocytogenes_ATCC_19117_882095_v1              | Listeria_monocytogenes_1639_v78 | 0.9278 |
| Listeria_monocytogenes_ATCC_19117_882095                 | Listeria_monocytogenes_1639_v78 | 0.9278 |
| Listeria_monocytogenes_6179_1288295                      | Listeria_monocytogenes_1639_v78 | 0.9516 |
| Listeria_monocytogenes_1639_v9                           | Listeria_monocytogenes_1639_v78 | 0.9301 |
| Listeria_monocytogenes_1639_v99                          | Listeria_monocytogenes_1639_v78 | 0.9264 |
| Listeria_monocytogenes_1639_v98                          | Listeria_monocytogenes_1639_v78 | 0.9467 |
| Listeria_monocytogenes_1639_v97                          | Listeria_monocytogenes_1639_v78 | 0.9315 |
| Listeria_monocytogenes_1639_v96                          | Listeria_monocytogenes_1639_v78 | 0.925  |
| Listeria_monocytogenes_1639_v95                          | Listeria_monocytogenes_1639_v78 | 0.925  |
| Listeria_monocytogenes_1639_v94                          | Listeria_monocytogenes_1639_v78 | 0.9254 |
| Listeria_monocytogenes_1639_v93                          | Listeria_monocytogenes_1639_v78 | 0.9452 |
| Listeria_monocytogenes_1639_v92                          | Listeria_monocytogenes_1639_v78 | 0.9276 |
| Listeria_monocytogenes_1639_v91                          | Listeria_monocytogenes_1639_v78 | 0.9271 |
| Listeria_monocytogenes_1639_v90                          | Listeria_monocytogenes_1639_v78 | 0.9467 |
| Listeria_monocytogenes_1639_v8                           | Listeria_monocytogenes_1639_v78 | 0.9463 |
| Listeria_monocytogenes_1639_v89                          | Listeria_monocytogenes_1639_v78 | 0.9346 |
| Listeria_monocytogenes_1639_v88                          | Listeria_monocytogenes_1639_v78 | 0.9571 |
| Listeria_monocytogenes_1639_v87                          | Listeria_monocytogenes_1639_v78 | 0.9531 |
| Listeria_monocytogenes_1639_v86                          | Listeria_monocytogenes_1639_v78 | 0.9528 |
| Listeria_monocytogenes_1639_v85                          | Listeria_monocytogenes_1639_v78 | 0.9184 |
| Listeria_monocytogenes_1639_v84                          | Listeria_monocytogenes_1639_v78 | 0.9622 |
| Listeria_monocytogenes_1639_v83                          | Listeria_monocytogenes_1639_v78 | 0.9223 |
| Listeria_monocytogenes_1639_v82                          | Listeria_monocytogenes_1639_v78 | 0.922  |
| Listeria_monocytogenes_1639_v81                          | Listeria_monocytogenes_1639_v78 | 0.9959 |
| Listeria_monocytogenes_1639_v80                          | Listeria_monocytogenes_1639_v78 | 0.9393 |
| Listeria_monocytogenes_1639_v7                           | Listeria_monocytogenes_1639_v78 | 0.9463 |
| Listeria_monocytogenes_1639_v79                          | Listeria_monocytogenes_1639_v78 | 0.9884 |
| Listeria_monocytogenes_1639_v78                          | Listeria_monocytogenes_1639_v78 | 0.0664 |
| Listeria_welshimeri_1643                                 | Listeria_monocytogenes_1639_v79 | 0.8665 |
| Listeria_welshimeri_serovar_6b_str_SLCC5334_386043       | Listeria_monocytogenes_1639_v79 | 0.8661 |
| Listeria_seeligeri_serovar_1_2b_str_SLCC3954_683837      | Listeria_monocytogenes_1639_v79 | 0.878  |
| Listeria_seeligeri_FSL_S4-171_702452                     | Listeria_monocytogenes_1639_v79 | 0.8187 |
| Listeria_seeligeri_FSL_N1-067_702453                     | Listeria_monocytogenes_1639_v79 | 0.8406 |
| Listeria_seeligeri_1640_v1                               | Listeria_monocytogenes_1639_v79 | 0.8742 |
| Listeria_seeligeri_1640                                  | Listeria_monocytogenes_1639_v79 | 0.8752 |
| Listeria_monocytogenes_WSLC1042_1457188                  | Listeria_monocytogenes_1639_v79 | 0.9203 |
| Listeria_monocytogenes_WSLC1001_1457187                  | Listeria_monocytogenes_1639_v79 | 0.9536 |
| Listeria_monocytogenes_SLCC7179_879090                   | Listeria_monocytogenes_1639_v79 | 0.9512 |
| Listeria_monocytogenes_SLCC5850_882096                   | Listeria_monocytogenes_1639_v79 | 0.9518 |
| Listeria_monocytogenes_SLCC2755_932919                   | Listeria_monocytogenes_1639_v79 | 0.9243 |
| Listeria_monocytogenes_SLCC2540_879089                   | Listeria_monocytogenes_1639_v79 | 0.9382 |
| Listeria_monocytogenes_SLCC2479_882020                   | Listeria_monocytogenes_1639_v79 | 0.9598 |
| Listeria_monocytogenes_SLCC2378_879088                   | Listeria_monocytogenes_1639_v79 | 0.9213 |
| Listeria_monocytogenes_SLCC2376_882097                   | Listeria_monocytogenes_1639_v79 | 0.9279 |
| Listeria_monocytogenes_SLCC2372_932920                   | Listeria_monocytogenes_1639_v79 | 0.9535 |
| Listeria_monocytogenes_serotype_4b_str_LL195_1230340     | Listeria_monocytogenes_1639_v79 | 0.9265 |
| Listeria_monocytogenes_serotype_4b_str_LIS0087_1134669   | Listeria_monocytogenes_1639_v79 | 0.9355 |
| Listeria_monocytogenes_serotype_4b_str_F2365_265669      | Listeria_monocytogenes_1639_v79 | 0.9265 |
| Listeria_monocytogenes_serotype_4b_str_CLIP_80459_568819 | Listeria_monocytogenes_1639_v79 | 0.9325 |
| Listeria_monocytogenes_serotype_4b_str_81-0861_1196161   | Listeria_monocytogenes_1639_v79 | 0.9177 |
| Listeria_monocytogenes_serotype_4b_str_81-0592_1196160   | Listeria_monocytogenes_1639_v79 | 0.9187 |
| Listeria_monocytogenes_serotype_4b_str_81-0558_1196159   | Listeria_monocytogenes_1639_v79 | 0.9191 |
| Listeria_monocytogenes_serotype_4b_str_10-0809_1196162   | Listeria_monocytogenes_1639_v79 | 0.9187 |
| Listeria_monocytogenes_serotype_4b_str_02-6680_1196175   | Listeria_monocytogenes_1639_v79 | 0.9322 |

|                                                          |                                 |        |
|----------------------------------------------------------|---------------------------------|--------|
| Listeria_monocytogenes_serotype_4b_str_02-6679_1196174   | Listeria_monocytogenes_1639_v79 | 0.9322 |
| Listeria_monocytogenes_serotype_4b_str_02-1792_1196173   | Listeria_monocytogenes_1639_v79 | 0.9187 |
| Listeria_monocytogenes_serotype_4b_str_02-1289_1196172   | Listeria_monocytogenes_1639_v79 | 0.9187 |
| Listeria_monocytogenes_serotype_4b_str_02-1103_1196171   | Listeria_monocytogenes_1639_v79 | 0.9187 |
| Listeria_monocytogenes_serotype_3c_str_10-5027_1196195   | Listeria_monocytogenes_1639_v79 | 0.9579 |
| Listeria_monocytogenes_serotype_1_2c_str_10-5026_1196194 | Listeria_monocytogenes_1639_v79 | 0.958  |
| Listeria_monocytogenes_serotype_1_2c_str_10-5025_1196193 | Listeria_monocytogenes_1639_v79 | 0.958  |
| Listeria_monocytogenes_serotype_1_2b_str_10-0811_1196164 | Listeria_monocytogenes_1639_v79 | 0.9374 |
| Listeria_monocytogenes_serotype_1_2b_str_10-0810_1196163 | Listeria_monocytogenes_1639_v79 | 0.9374 |
| Listeria_monocytogenes_serotype_1_2a_str_99-6370_1196179 | Listeria_monocytogenes_1639_v79 | 0.9519 |
| Listeria_monocytogenes_serotype_1_2a_str_98-2035_1196178 | Listeria_monocytogenes_1639_v79 | 0.9519 |
| Listeria_monocytogenes_serotype_1_2a_str_95-0093_1196177 | Listeria_monocytogenes_1639_v79 | 0.9564 |
| Listeria_monocytogenes_serotype_1_2a_str_88-0478_1196176 | Listeria_monocytogenes_1639_v79 | 0.9545 |
| Listeria_monocytogenes_serotype_1_2a_str_10-5024_1196192 | Listeria_monocytogenes_1639_v79 | 0.9571 |
| Listeria_monocytogenes_serotype_1_2a_str_10-4758_1196168 | Listeria_monocytogenes_1639_v79 | 0.9557 |
| Listeria_monocytogenes_serotype_1_2a_str_10-4754_1196167 | Listeria_monocytogenes_1639_v79 | 0.956  |
| Listeria_monocytogenes_serotype_1_2a_str_10-1321_1196191 | Listeria_monocytogenes_1639_v79 | 0.9571 |
| Listeria_monocytogenes_serotype_1_2a_str_10-1047_1196190 | Listeria_monocytogenes_1639_v79 | 0.9575 |
| Listeria_monocytogenes_serotype_1_2a_str_10-1046_1196189 | Listeria_monocytogenes_1639_v79 | 0.9575 |
| Listeria_monocytogenes_serotype_1_2a_str_10-0934_1196170 | Listeria_monocytogenes_1639_v79 | 0.9505 |
| Listeria_monocytogenes_serotype_1_2a_str_10-0933_1196169 | Listeria_monocytogenes_1639_v79 | 0.9505 |
| Listeria_monocytogenes_serotype_1_2a_str_10-0815_1196188 | Listeria_monocytogenes_1639_v79 | 0.9529 |
| Listeria_monocytogenes_serotype_1_2a_str_10-0814_1196187 | Listeria_monocytogenes_1639_v79 | 0.9571 |
| Listeria_monocytogenes_serotype_1_2a_str_10-0813_1196166 | Listeria_monocytogenes_1639_v79 | 0.9529 |
| Listeria_monocytogenes_serotype_1_2a_str_10-0812_1196165 | Listeria_monocytogenes_1639_v79 | 0.9529 |
| Listeria_monocytogenes_serotype_1_2a_str_08-7669_1196186 | Listeria_monocytogenes_1639_v79 | 0.9537 |
| Listeria_monocytogenes_serotype_1_2a_str_08-7374_1196185 | Listeria_monocytogenes_1639_v79 | 0.9571 |
| Listeria_monocytogenes_serotype_1_2a_str_08-6997_1196184 | Listeria_monocytogenes_1639_v79 | 0.9529 |
| Listeria_monocytogenes_serotype_1_2a_str_08-6569_1196183 | Listeria_monocytogenes_1639_v79 | 0.9529 |
| Listeria_monocytogenes_serotype_1_2a_str_08-6056_1196182 | Listeria_monocytogenes_1639_v79 | 0.9529 |
| Listeria_monocytogenes_serotype_1_2a_str_04-5457_1196181 | Listeria_monocytogenes_1639_v79 | 0.9571 |
| Listeria_monocytogenes_serotype_1_2a_str_02-5993_1196180 | Listeria_monocytogenes_1639_v79 | 0.9571 |
| Listeria_monocytogenes_R479a_1437838                     | Listeria_monocytogenes_1639_v79 | 0.9568 |
| Listeria_monocytogenes_N53-1_1234142                     | Listeria_monocytogenes_1639_v79 | 0.8991 |
| Listeria_monocytogenes_M7_1030009                        | Listeria_monocytogenes_1639_v79 | 0.9077 |
| Listeria_monocytogenes_LO28_393132                       | Listeria_monocytogenes_1639_v79 | 0.9532 |
| Listeria_monocytogenes_L99_563174                        | Listeria_monocytogenes_1639_v79 | 0.9081 |
| Listeria_monocytogenes_L312_882094                       | Listeria_monocytogenes_1639_v79 | 0.9325 |
| Listeria_monocytogenes_J1816_930781                      | Listeria_monocytogenes_1639_v79 | 0.9254 |
| Listeria_monocytogenes_J1-220_930782                     | Listeria_monocytogenes_1639_v79 | 0.9223 |
| Listeria_monocytogenes_J0161_393130                      | Listeria_monocytogenes_1639_v79 | 0.9513 |
| Listeria_monocytogenes_HCC23_552536                      | Listeria_monocytogenes_1639_v79 | 0.9074 |
| Listeria_monocytogenes_FSL_R2-561_393126                 | Listeria_monocytogenes_1639_v79 | 0.9562 |
| Listeria_monocytogenes_FSL_J1-208_393119                 | Listeria_monocytogenes_1639_v79 | 0.8934 |
| Listeria_monocytogenes_FSL_J1-175_393118                 | Listeria_monocytogenes_1639_v79 | 0.9391 |
| Listeria_monocytogenes_Finland_1998_393127               | Listeria_monocytogenes_1639_v79 | 0.9745 |
| Listeria_monocytogenes_EGD-e_169963_v1                   | Listeria_monocytogenes_1639_v79 | 0.9463 |
| Listeria_monocytogenes_EGD-e_169963                      | Listeria_monocytogenes_1639_v79 | 0.9463 |
| Listeria_monocytogenes_EGD_1334565                       | Listeria_monocytogenes_1639_v79 | 0.9526 |
| Listeria_monocytogenes_CFSAN002349_1299895               | Listeria_monocytogenes_1639_v79 | 0.9323 |
| Listeria_monocytogenes_ATCC_19117_882095_v1              | Listeria_monocytogenes_1639_v79 | 0.9267 |
| Listeria_monocytogenes_ATCC_19117_882095                 | Listeria_monocytogenes_1639_v79 | 0.9264 |
| Listeria_monocytogenes_6179_1288295                      | Listeria_monocytogenes_1639_v79 | 0.9491 |
| Listeria_monocytogenes_1639_v9                           | Listeria_monocytogenes_1639_v79 | 0.9277 |
| Listeria_monocytogenes_1639_v99                          | Listeria_monocytogenes_1639_v79 | 0.9254 |
| Listeria_monocytogenes_1639_v98                          | Listeria_monocytogenes_1639_v79 | 0.9472 |
| Listeria_monocytogenes_1639_v97                          | Listeria_monocytogenes_1639_v79 | 0.9304 |
| Listeria_monocytogenes_1639_v96                          | Listeria_monocytogenes_1639_v79 | 0.9251 |
| Listeria_monocytogenes_1639_v95                          | Listeria_monocytogenes_1639_v79 | 0.9251 |
| Listeria_monocytogenes_1639_v94                          | Listeria_monocytogenes_1639_v79 | 0.9258 |
| Listeria_monocytogenes_1639_v93                          | Listeria_monocytogenes_1639_v79 | 0.9423 |
| Listeria_monocytogenes_1639_v92                          | Listeria_monocytogenes_1639_v79 | 0.9262 |
| Listeria_monocytogenes_1639_v91                          | Listeria_monocytogenes_1639_v79 | 0.9231 |
| Listeria_monocytogenes_1639_v90                          | Listeria_monocytogenes_1639_v79 | 0.9472 |
| Listeria_monocytogenes_1639_v8                           | Listeria_monocytogenes_1639_v79 | 0.9416 |
| Listeria_monocytogenes_1639_v89                          | Listeria_monocytogenes_1639_v79 | 0.9339 |
| Listeria_monocytogenes_1639_v88                          | Listeria_monocytogenes_1639_v79 | 0.9575 |
| Listeria_monocytogenes_1639_v87                          | Listeria_monocytogenes_1639_v79 | 0.9502 |
| Listeria_monocytogenes_1639_v86                          | Listeria_monocytogenes_1639_v79 | 0.9502 |
| Listeria_monocytogenes_1639_v85                          | Listeria_monocytogenes_1639_v79 | 0.917  |
| Listeria_monocytogenes_1639_v84                          | Listeria_monocytogenes_1639_v79 | 0.963  |
| Listeria_monocytogenes_1639_v83                          | Listeria_monocytogenes_1639_v79 | 0.9197 |
| Listeria_monocytogenes_1639_v82                          | Listeria_monocytogenes_1639_v79 | 0.9194 |
| Listeria_monocytogenes_1639_v81                          | Listeria_monocytogenes_1639_v79 | 0.9881 |
| Listeria_monocytogenes_1639_v80                          | Listeria_monocytogenes_1639_v79 | 0.9361 |
| Listeria_monocytogenes_1639_v7                           | Listeria_monocytogenes_1639_v79 | 0.9416 |
| Listeria_monocytogenes_1639_v79                          | Listeria_monocytogenes_1639_v79 | 0.0678 |
| Listeria_welshimeri_1643                                 | Listeria_monocytogenes_1639_v7  | 0.8549 |
| Listeria_welshimeri_serovar_6b_str_SLCC5334_386043       | Listeria_monocytogenes_1639_v7  | 0.8543 |
| Listeria_seeligeri_serovar_1_2b_str_SLCC3954_683837      | Listeria_monocytogenes_1639_v7  | 0.859  |
| Listeria_seeligeri_FSL_S4-171_702452                     | Listeria_monocytogenes_1639_v7  | 0.8033 |
| Listeria_seeligeri_FSL_N1-067_702453                     | Listeria_monocytogenes_1639_v7  | 0.8312 |
| Listeria_seeligeri_1640_v1                               | Listeria_monocytogenes_1639_v7  | 0.8618 |
| Listeria_seeligeri_1640                                  | Listeria_monocytogenes_1639_v7  | 0.8537 |
| Listeria_monocytogenes_WSLC1042_1457188                  | Listeria_monocytogenes_1639_v7  | 0.9067 |
| Listeria_monocytogenes_WSLC1001_1457187                  | Listeria_monocytogenes_1639_v7  | 0.9383 |
| Listeria_monocytogenes_SLCC7179_879090                   | Listeria_monocytogenes_1639_v7  | 0.9351 |
| Listeria_monocytogenes_SLCC5850_882096                   | Listeria_monocytogenes_1639_v7  | 0.9391 |
| Listeria_monocytogenes_SLCC2755_932919                   | Listeria_monocytogenes_1639_v7  | 0.9345 |
| Listeria_monocytogenes_SLCC2540_879089                   | Listeria_monocytogenes_1639_v7  | 0.9206 |
| Listeria_monocytogenes_SLCC2479_882020                   | Listeria_monocytogenes_1639_v7  | 0.9402 |

|                                                          |                                 |        |
|----------------------------------------------------------|---------------------------------|--------|
| Listeria_monocytogenes_SLCC2378_879088                   | Listeria_monocytogenes_1639_v7  | 0.9081 |
| Listeria_monocytogenes_SLCC2376_882097                   | Listeria_monocytogenes_1639_v7  | 0.9102 |
| Listeria_monocytogenes_SLCC2372_932920                   | Listeria_monocytogenes_1639_v7  | 0.9424 |
| Listeria_monocytogenes_serotype_4b_str_LL195_1230340     | Listeria_monocytogenes_1639_v7  | 0.9116 |
| Listeria_monocytogenes_serotype_4b_str_LIS0087_1134669   | Listeria_monocytogenes_1639_v7  | 0.9192 |
| Listeria_monocytogenes_serotype_4b_str_F2365_265669      | Listeria_monocytogenes_1639_v7  | 0.9116 |
| Listeria_monocytogenes_serotype_4b_str_CLIP_80459_568819 | Listeria_monocytogenes_1639_v7  | 0.9182 |
| Listeria_monocytogenes_serotype_4b_str_81-0861_1196161   | Listeria_monocytogenes_1639_v7  | 0.9043 |
| Listeria_monocytogenes_serotype_4b_str_81-0592_1196160   | Listeria_monocytogenes_1639_v7  | 0.9053 |
| Listeria_monocytogenes_serotype_4b_str_81-0558_1196159   | Listeria_monocytogenes_1639_v7  | 0.906  |
| Listeria_monocytogenes_serotype_4b_str_10-0809_1196162   | Listeria_monocytogenes_1639_v7  | 0.9053 |
| Listeria_monocytogenes_serotype_4b_str_02-6680_1196175   | Listeria_monocytogenes_1639_v7  | 0.915  |
| Listeria_monocytogenes_serotype_4b_str_02-6679_1196174   | Listeria_monocytogenes_1639_v7  | 0.915  |
| Listeria_monocytogenes_serotype_4b_str_02-1792_1196173   | Listeria_monocytogenes_1639_v7  | 0.9071 |
| Listeria_monocytogenes_serotype_4b_str_02-1289_1196172   | Listeria_monocytogenes_1639_v7  | 0.9071 |
| Listeria_monocytogenes_serotype_4b_str_02-1103_1196171   | Listeria_monocytogenes_1639_v7  | 0.9071 |
| Listeria_monocytogenes_serotype_3c_str_10-5027_1196195   | Listeria_monocytogenes_1639_v7  | 0.9431 |
| Listeria_monocytogenes_serotype_1_2c_str_10-5026_1196194 | Listeria_monocytogenes_1639_v7  | 0.9445 |
| Listeria_monocytogenes_serotype_1_2c_str_10-5025_1196193 | Listeria_monocytogenes_1639_v7  | 0.9445 |
| Listeria_monocytogenes_serotype_1_2b_str_10-0811_1196164 | Listeria_monocytogenes_1639_v7  | 0.9241 |
| Listeria_monocytogenes_serotype_1_2b_str_10-0810_1196163 | Listeria_monocytogenes_1639_v7  | 0.9241 |
| Listeria_monocytogenes_serotype_1_2a_str_99-6370_1196179 | Listeria_monocytogenes_1639_v7  | 0.9524 |
| Listeria_monocytogenes_serotype_1_2a_str_98-2035_1196178 | Listeria_monocytogenes_1639_v7  | 0.9524 |
| Listeria_monocytogenes_serotype_1_2a_str_95-0093_1196177 | Listeria_monocytogenes_1639_v7  | 0.9569 |
| Listeria_monocytogenes_serotype_1_2a_str_88-0478_1196176 | Listeria_monocytogenes_1639_v7  | 0.9572 |
| Listeria_monocytogenes_serotype_1_2a_str_10-5024_1196192 | Listeria_monocytogenes_1639_v7  | 0.9572 |
| Listeria_monocytogenes_serotype_1_2a_str_10-4758_1196168 | Listeria_monocytogenes_1639_v7  | 0.9377 |
| Listeria_monocytogenes_serotype_1_2a_str_10-4754_1196167 | Listeria_monocytogenes_1639_v7  | 0.9377 |
| Listeria_monocytogenes_serotype_1_2a_str_10-1321_1196191 | Listeria_monocytogenes_1639_v7  | 0.9572 |
| Listeria_monocytogenes_serotype_1_2a_str_10-1047_1196190 | Listeria_monocytogenes_1639_v7  | 0.959  |
| Listeria_monocytogenes_serotype_1_2a_str_10-1046_1196189 | Listeria_monocytogenes_1639_v7  | 0.959  |
| Listeria_monocytogenes_serotype_1_2a_str_10-0934_1196170 | Listeria_monocytogenes_1639_v7  | 0.9377 |
| Listeria_monocytogenes_serotype_1_2a_str_10-0933_1196169 | Listeria_monocytogenes_1639_v7  | 0.9377 |
| Listeria_monocytogenes_serotype_1_2a_str_10-0815_1196188 | Listeria_monocytogenes_1639_v7  | 0.9527 |
| Listeria_monocytogenes_serotype_1_2a_str_10-0814_1196187 | Listeria_monocytogenes_1639_v7  | 0.9569 |
| Listeria_monocytogenes_serotype_1_2a_str_10-0813_1196166 | Listeria_monocytogenes_1639_v7  | 0.9447 |
| Listeria_monocytogenes_serotype_1_2a_str_10-0812_1196165 | Listeria_monocytogenes_1639_v7  | 0.9447 |
| Listeria_monocytogenes_serotype_1_2a_str_08-7669_1196186 | Listeria_monocytogenes_1639_v7  | 0.9524 |
| Listeria_monocytogenes_serotype_1_2a_str_08-7374_1196185 | Listeria_monocytogenes_1639_v7  | 0.9572 |
| Listeria_monocytogenes_serotype_1_2a_str_08-6997_1196184 | Listeria_monocytogenes_1639_v7  | 0.9527 |
| Listeria_monocytogenes_serotype_1_2a_str_08-6569_1196183 | Listeria_monocytogenes_1639_v7  | 0.9527 |
| Listeria_monocytogenes_serotype_1_2a_str_08-6056_1196182 | Listeria_monocytogenes_1639_v7  | 0.9527 |
| Listeria_monocytogenes_serotype_1_2a_str_04-5457_1196181 | Listeria_monocytogenes_1639_v7  | 0.9572 |
| Listeria_monocytogenes_serotype_1_2a_str_02-5993_1196180 | Listeria_monocytogenes_1639_v7  | 0.9569 |
| Listeria_monocytogenes_R479a_1437838                     | Listeria_monocytogenes_1639_v7  | 0.9754 |
| Listeria_monocytogenes_N53-1_1234142                     | Listeria_monocytogenes_1639_v7  | 0.8818 |
| Listeria_monocytogenes_M7_1030009                        | Listeria_monocytogenes_1639_v7  | 0.8903 |
| Listeria_monocytogenes_LO28_393132                       | Listeria_monocytogenes_1639_v7  | 0.9348 |
| Listeria_monocytogenes_L99_563174                        | Listeria_monocytogenes_1639_v7  | 0.891  |
| Listeria_monocytogenes_L312_882094                       | Listeria_monocytogenes_1639_v7  | 0.9182 |
| Listeria_monocytogenes_J1816_930781                      | Listeria_monocytogenes_1639_v7  | 0.9104 |
| Listeria_monocytogenes_J1-220_930782                     | Listeria_monocytogenes_1639_v7  | 0.9097 |
| Listeria_monocytogenes_J0161_393130                      | Listeria_monocytogenes_1639_v7  | 0.9308 |
| Listeria_monocytogenes_HCC23_552536                      | Listeria_monocytogenes_1639_v7  | 0.8903 |
| Listeria_monocytogenes_FSL_R2-561_393126                 | Listeria_monocytogenes_1639_v7  | 0.9406 |
| Listeria_monocytogenes_FSL_J1-208_393119                 | Listeria_monocytogenes_1639_v7  | 0.8774 |
| Listeria_monocytogenes_FSL_J1-175_393118                 | Listeria_monocytogenes_1639_v7  | 0.9207 |
| Listeria_monocytogenes_Finland_1998_393127               | Listeria_monocytogenes_1639_v7  | 0.938  |
| Listeria_monocytogenes_EGD-e_169963_v1                   | Listeria_monocytogenes_1639_v7  | 0.9312 |
| Listeria_monocytogenes_EGD-e_169963                      | Listeria_monocytogenes_1639_v7  | 0.9312 |
| Listeria_monocytogenes_EGD_1334565                       | Listeria_monocytogenes_1639_v7  | 0.9398 |
| Listeria_monocytogenes_CFSAN002349_1299895               | Listeria_monocytogenes_1639_v7  | 0.9155 |
| Listeria_monocytogenes_ATCC_19117_882095_v1              | Listeria_monocytogenes_1639_v7  | 0.9126 |
| Listeria_monocytogenes_ATCC_19117_882095                 | Listeria_monocytogenes_1639_v7  | 0.9126 |
| Listeria_monocytogenes_6179_1288295                      | Listeria_monocytogenes_1639_v7  | 0.9464 |
| Listeria_monocytogenes_1639_v9                           | Listeria_monocytogenes_1639_v7  | 0.9061 |
| Listeria_monocytogenes_1639_v99                          | Listeria_monocytogenes_1639_v7  | 0.917  |
| Listeria_monocytogenes_1639_v98                          | Listeria_monocytogenes_1639_v7  | 0.9263 |
| Listeria_monocytogenes_1639_v97                          | Listeria_monocytogenes_1639_v7  | 0.9131 |
| Listeria_monocytogenes_1639_v96                          | Listeria_monocytogenes_1639_v7  | 0.9163 |
| Listeria_monocytogenes_1639_v95                          | Listeria_monocytogenes_1639_v7  | 0.9164 |
| Listeria_monocytogenes_1639_v94                          | Listeria_monocytogenes_1639_v7  | 0.9167 |
| Listeria_monocytogenes_1639_v93                          | Listeria_monocytogenes_1639_v7  | 0.9405 |
| Listeria_monocytogenes_1639_v92                          | Listeria_monocytogenes_1639_v7  | 0.9167 |
| Listeria_monocytogenes_1639_v91                          | Listeria_monocytogenes_1639_v7  | 0.9092 |
| Listeria_monocytogenes_1639_v90                          | Listeria_monocytogenes_1639_v7  | 0.9263 |
| Listeria_monocytogenes_1639_v8                           | Listeria_monocytogenes_1639_v7  | 1      |
| Listeria_monocytogenes_1639_v89                          | Listeria_monocytogenes_1639_v7  | 0.9138 |
| Listeria_monocytogenes_1639_v88                          | Listeria_monocytogenes_1639_v7  | 0.944  |
| Listeria_monocytogenes_1639_v87                          | Listeria_monocytogenes_1639_v7  | 0.9355 |
| Listeria_monocytogenes_1639_v86                          | Listeria_monocytogenes_1639_v7  | 0.9348 |
| Listeria_monocytogenes_1639_v85                          | Listeria_monocytogenes_1639_v7  | 0.9048 |
| Listeria_monocytogenes_1639_v84                          | Listeria_monocytogenes_1639_v7  | 0.9432 |
| Listeria_monocytogenes_1639_v83                          | Listeria_monocytogenes_1639_v7  | 0.9074 |
| Listeria_monocytogenes_1639_v82                          | Listeria_monocytogenes_1639_v7  | 0.9071 |
| Listeria_monocytogenes_1639_v81                          | Listeria_monocytogenes_1639_v7  | 0.9469 |
| Listeria_monocytogenes_1639_v80                          | Listeria_monocytogenes_1639_v7  | 0.9241 |
| Listeria_monocytogenes_1639_v7                           | Listeria_monocytogenes_1639_v7  | 0.0702 |
| Listeria_welshimeri_1643                                 | Listeria_monocytogenes_1639_v80 | 0.8739 |
| Listeria_welshimeri_serovar_6b_str_SLCC5334_386043       | Listeria_monocytogenes_1639_v80 | 0.8732 |
| Listeria_seeligeri_serovar_1_2b_str_SLCC3954_683837      | Listeria_monocytogenes_1639_v80 | 0.8783 |



|                                                          |                                 |        |
|----------------------------------------------------------|---------------------------------|--------|
| Listeria_seeligeri_FSL_S4-171_702452                     | Listeria_monocytogenes_1639_v80 | 0.8183 |
| Listeria_seeligeri_FSL_N1-067_702453                     | Listeria_monocytogenes_1639_v80 | 0.8286 |
| Listeria_seeligeri_1640_v1                               | Listeria_monocytogenes_1639_v80 | 0.8802 |
| Listeria_seeligeri_1640                                  | Listeria_monocytogenes_1639_v80 | 0.881  |
| Listeria_monocytogenes_WSLC1042_1457188                  | Listeria_monocytogenes_1639_v80 | 0.9434 |
| Listeria_monocytogenes_WSLC1001_1457187                  | Listeria_monocytogenes_1639_v80 | 0.9413 |
| Listeria_monocytogenes_SLCC7179_879090                   | Listeria_monocytogenes_1639_v80 | 0.9465 |
| Listeria_monocytogenes_SLCC5850_882096                   | Listeria_monocytogenes_1639_v80 | 0.9437 |
| Listeria_monocytogenes_SLCC2755_932919                   | Listeria_monocytogenes_1639_v80 | 0.9355 |
| Listeria_monocytogenes_SLCC2540_879089                   | Listeria_monocytogenes_1639_v80 | 0.9601 |
| Listeria_monocytogenes_SLCC2479_882020                   | Listeria_monocytogenes_1639_v80 | 0.9406 |
| Listeria_monocytogenes_SLCC2378_879088                   | Listeria_monocytogenes_1639_v80 | 0.9448 |
| Listeria_monocytogenes_SLCC2376_882097                   | Listeria_monocytogenes_1639_v80 | 0.9319 |
| Listeria_monocytogenes_SLCC2372_932920                   | Listeria_monocytogenes_1639_v80 | 0.9333 |
| Listeria_monocytogenes_serotype_4b_str_LL195_1230340     | Listeria_monocytogenes_1639_v80 | 0.9501 |
| Listeria_monocytogenes_serotype_4b_str_LIS0087_1134669   | Listeria_monocytogenes_1639_v80 | 0.9314 |
| Listeria_monocytogenes_serotype_4b_str_F2365_265669      | Listeria_monocytogenes_1639_v80 | 0.9501 |
| Listeria_monocytogenes_serotype_4b_str_CLIP_80459_568819 | Listeria_monocytogenes_1639_v80 | 0.9508 |
| Listeria_monocytogenes_serotype_4b_str_81-0861_1196161   | Listeria_monocytogenes_1639_v80 | 0.9439 |
| Listeria_monocytogenes_serotype_4b_str_81-0592_1196160   | Listeria_monocytogenes_1639_v80 | 0.945  |
| Listeria_monocytogenes_serotype_4b_str_81-0558_1196159   | Listeria_monocytogenes_1639_v80 | 0.9442 |
| Listeria_monocytogenes_serotype_4b_str_10-0809_1196162   | Listeria_monocytogenes_1639_v80 | 0.945  |
| Listeria_monocytogenes_serotype_4b_str_02-6680_1196175   | Listeria_monocytogenes_1639_v80 | 0.946  |
| Listeria_monocytogenes_serotype_4b_str_02-6679_1196174   | Listeria_monocytogenes_1639_v80 | 0.946  |
| Listeria_monocytogenes_serotype_4b_str_02-1792_1196173   | Listeria_monocytogenes_1639_v80 | 0.948  |
| Listeria_monocytogenes_serotype_4b_str_02-1289_1196172   | Listeria_monocytogenes_1639_v80 | 0.948  |
| Listeria_monocytogenes_serotype_4b_str_02-1103_1196171   | Listeria_monocytogenes_1639_v80 | 0.948  |
| Listeria_monocytogenes_serotype_3c_str_10-5027_1196195   | Listeria_monocytogenes_1639_v80 | 0.9413 |
| Listeria_monocytogenes_serotype_1_2c_str_10-5026_1196194 | Listeria_monocytogenes_1639_v80 | 0.9425 |
| Listeria_monocytogenes_serotype_1_2c_str_10-5025_1196193 | Listeria_monocytogenes_1639_v80 | 0.9425 |
| Listeria_monocytogenes_serotype_1_2b_str_10-0811_1196164 | Listeria_monocytogenes_1639_v80 | 0.9769 |
| Listeria_monocytogenes_serotype_1_2b_str_10-0810_1196163 | Listeria_monocytogenes_1639_v80 | 0.9769 |
| Listeria_monocytogenes_serotype_1_2a_str_99-6370_1196179 | Listeria_monocytogenes_1639_v80 | 0.9299 |
| Listeria_monocytogenes_serotype_1_2a_str_98-2035_1196178 | Listeria_monocytogenes_1639_v80 | 0.9299 |
| Listeria_monocytogenes_serotype_1_2a_str_95-0093_1196177 | Listeria_monocytogenes_1639_v80 | 0.9351 |
| Listeria_monocytogenes_serotype_1_2a_str_88-0478_1196176 | Listeria_monocytogenes_1639_v80 | 0.9332 |
| Listeria_monocytogenes_serotype_1_2a_str_10-5024_1196192 | Listeria_monocytogenes_1639_v80 | 0.9354 |
| Listeria_monocytogenes_serotype_1_2a_str_10-4758_1196168 | Listeria_monocytogenes_1639_v80 | 0.9483 |
| Listeria_monocytogenes_serotype_1_2a_str_10-4754_1196167 | Listeria_monocytogenes_1639_v80 | 0.9483 |
| Listeria_monocytogenes_serotype_1_2a_str_10-1321_1196191 | Listeria_monocytogenes_1639_v80 | 0.9354 |
| Listeria_monocytogenes_serotype_1_2a_str_10-1047_1196190 | Listeria_monocytogenes_1639_v80 | 0.9354 |
| Listeria_monocytogenes_serotype_1_2a_str_10-1046_1196189 | Listeria_monocytogenes_1639_v80 | 0.9354 |
| Listeria_monocytogenes_serotype_1_2a_str_10-0934_1196170 | Listeria_monocytogenes_1639_v80 | 0.9407 |
| Listeria_monocytogenes_serotype_1_2a_str_10-0933_1196169 | Listeria_monocytogenes_1639_v80 | 0.9407 |
| Listeria_monocytogenes_serotype_1_2a_str_10-0815_1196188 | Listeria_monocytogenes_1639_v80 | 0.9309 |
| Listeria_monocytogenes_serotype_1_2a_str_10-0814_1196187 | Listeria_monocytogenes_1639_v80 | 0.9354 |
| Listeria_monocytogenes_serotype_1_2a_str_10-0813_1196166 | Listeria_monocytogenes_1639_v80 | 0.9479 |
| Listeria_monocytogenes_serotype_1_2a_str_10-0812_1196165 | Listeria_monocytogenes_1639_v80 | 0.9479 |
| Listeria_monocytogenes_serotype_1_2a_str_08-7669_1196186 | Listeria_monocytogenes_1639_v80 | 0.9306 |
| Listeria_monocytogenes_serotype_1_2a_str_08-7374_1196185 | Listeria_monocytogenes_1639_v80 | 0.9354 |
| Listeria_monocytogenes_serotype_1_2a_str_08-6997_1196184 | Listeria_monocytogenes_1639_v80 | 0.9309 |
| Listeria_monocytogenes_serotype_1_2a_str_08-6569_1196183 | Listeria_monocytogenes_1639_v80 | 0.9309 |
| Listeria_monocytogenes_serotype_1_2a_str_08-6056_1196182 | Listeria_monocytogenes_1639_v80 | 0.9309 |
| Listeria_monocytogenes_serotype_1_2a_str_04-5457_1196181 | Listeria_monocytogenes_1639_v80 | 0.9354 |
| Listeria_monocytogenes_serotype_1_2a_str_02-5993_1196180 | Listeria_monocytogenes_1639_v80 | 0.9351 |
| Listeria_monocytogenes_R479a_1437838                     | Listeria_monocytogenes_1639_v80 | 0.9333 |
| Listeria_monocytogenes_N53-1_1234142                     | Listeria_monocytogenes_1639_v80 | 0.8947 |
| Listeria_monocytogenes_M7_1030009                        | Listeria_monocytogenes_1639_v80 | 0.9159 |
| Listeria_monocytogenes_LO28_393132                       | Listeria_monocytogenes_1639_v80 | 0.9467 |
| Listeria_monocytogenes_L99_563174                        | Listeria_monocytogenes_1639_v80 | 0.9166 |
| Listeria_monocytogenes_L312_882094                       | Listeria_monocytogenes_1639_v80 | 0.9512 |
| Listeria_monocytogenes_J1816_930781                      | Listeria_monocytogenes_1639_v80 | 0.9392 |
| Listeria_monocytogenes_J1-220_930782                     | Listeria_monocytogenes_1639_v80 | 0.9458 |
| Listeria_monocytogenes_J0161_393130                      | Listeria_monocytogenes_1639_v80 | 0.9403 |
| Listeria_monocytogenes_HCC23_552536                      | Listeria_monocytogenes_1639_v80 | 0.9162 |
| Listeria_monocytogenes_FSL_R2-561_393126                 | Listeria_monocytogenes_1639_v80 | 0.9399 |
| Listeria_monocytogenes_FSL_J1-208_393119                 | Listeria_monocytogenes_1639_v80 | 0.9006 |
| Listeria_monocytogenes_FSL_J1-175_393118                 | Listeria_monocytogenes_1639_v80 | 0.9618 |
| Listeria_monocytogenes_Finland_1998_393127               | Listeria_monocytogenes_1639_v80 | 0.9411 |
| Listeria_monocytogenes_EGD-e_169963_v1                   | Listeria_monocytogenes_1639_v80 | 0.9446 |
| Listeria_monocytogenes_EGD-e_169963                      | Listeria_monocytogenes_1639_v80 | 0.945  |
| Listeria_monocytogenes_EGD_1334565                       | Listeria_monocytogenes_1639_v80 | 0.9444 |
| Listeria_monocytogenes_CFSAN002349_1299895               | Listeria_monocytogenes_1639_v80 | 0.9529 |
| Listeria_monocytogenes_ATCC_19117_882095_v1              | Listeria_monocytogenes_1639_v80 | 0.9458 |
| Listeria_monocytogenes_ATCC_19117_882095                 | Listeria_monocytogenes_1639_v80 | 0.9458 |
| Listeria_monocytogenes_6179_1288295                      | Listeria_monocytogenes_1639_v80 | 0.933  |
| Listeria_monocytogenes_1639_v9                           | Listeria_monocytogenes_1639_v80 | 0.9494 |
| Listeria_monocytogenes_1639_v99                          | Listeria_monocytogenes_1639_v80 | 0.94   |
| Listeria_monocytogenes_1639_v98                          | Listeria_monocytogenes_1639_v80 | 0.9369 |
| Listeria_monocytogenes_1639_v97                          | Listeria_monocytogenes_1639_v80 | 0.9421 |
| Listeria_monocytogenes_1639_v96                          | Listeria_monocytogenes_1639_v80 | 0.9393 |
| Listeria_monocytogenes_1639_v95                          | Listeria_monocytogenes_1639_v80 | 0.9393 |
| Listeria_monocytogenes_1639_v94                          | Listeria_monocytogenes_1639_v80 | 0.9393 |
| Listeria_monocytogenes_1639_v93                          | Listeria_monocytogenes_1639_v80 | 0.9354 |
| Listeria_monocytogenes_1639_v92                          | Listeria_monocytogenes_1639_v80 | 0.9385 |
| Listeria_monocytogenes_1639_v91                          | Listeria_monocytogenes_1639_v80 | 0.9504 |
| Listeria_monocytogenes_1639_v90                          | Listeria_monocytogenes_1639_v80 | 0.9369 |
| Listeria_monocytogenes_1639_v8                           | Listeria_monocytogenes_1639_v80 | 0.9241 |
| Listeria_monocytogenes_1639_v89                          | Listeria_monocytogenes_1639_v80 | 0.9525 |
| Listeria_monocytogenes_1639_v88                          | Listeria_monocytogenes_1639_v80 | 0.9416 |
| Listeria_monocytogenes_1639_v87                          | Listeria_monocytogenes_1639_v80 | 0.944  |

|                                                          |                                 |        |
|----------------------------------------------------------|---------------------------------|--------|
| Listeria_monocytogenes_1639_v86                          | Listeria_monocytogenes_1639_v80 | 0.9429 |
| Listeria_monocytogenes_1639_v85                          | Listeria_monocytogenes_1639_v80 | 0.9462 |
| Listeria_monocytogenes_1639_v84                          | Listeria_monocytogenes_1639_v80 | 0.9418 |
| Listeria_monocytogenes_1639_v83                          | Listeria_monocytogenes_1639_v80 | 0.9472 |
| Listeria_monocytogenes_1639_v82                          | Listeria_monocytogenes_1639_v80 | 0.9468 |
| Listeria_monocytogenes_1639_v81                          | Listeria_monocytogenes_1639_v80 | 0.9393 |
| Listeria_monocytogenes_1639_v80                          | Listeria_monocytogenes_1639_v80 | 0.068  |
| Listeria_welshimeri_1643                                 | Listeria_monocytogenes_1639_v81 | 0.8707 |
| Listeria_welshimeri_serovar_6b_str_SLCC5334_386043       | Listeria_monocytogenes_1639_v81 | 0.8701 |
| Listeria_seeligeri_serovar_1_2b_str_SLCC3954_683837      | Listeria_monocytogenes_1639_v81 | 0.8797 |
| Listeria_seeligeri_FSL_S4-171_702452                     | Listeria_monocytogenes_1639_v81 | 0.8207 |
| Listeria_seeligeri_FSL_N1-067_702453                     | Listeria_monocytogenes_1639_v81 | 0.8452 |
| Listeria_seeligeri_1640_v1                               | Listeria_monocytogenes_1639_v81 | 0.8759 |
| Listeria_seeligeri_1640                                  | Listeria_monocytogenes_1639_v81 | 0.8775 |
| Listeria_monocytogenes_WSLC1042_1457188                  | Listeria_monocytogenes_1639_v81 | 0.922  |
| Listeria_monocytogenes_WSLC1001_1457187                  | Listeria_monocytogenes_1639_v81 | 0.9546 |
| Listeria_monocytogenes_SLCC7179_879090                   | Listeria_monocytogenes_1639_v81 | 0.953  |
| Listeria_monocytogenes_SLCC5850_882096                   | Listeria_monocytogenes_1639_v81 | 0.9555 |
| Listeria_monocytogenes_SLCC2755_932919                   | Listeria_monocytogenes_1639_v81 | 0.9263 |
| Listeria_monocytogenes_SLCC2540_879089                   | Listeria_monocytogenes_1639_v81 | 0.9418 |
| Listeria_monocytogenes_SLCC2479_882020                   | Listeria_monocytogenes_1639_v81 | 0.9605 |
| Listeria_monocytogenes_SLCC2378_879088                   | Listeria_monocytogenes_1639_v81 | 0.9234 |
| Listeria_monocytogenes_SLCC2376_882097                   | Listeria_monocytogenes_1639_v81 | 0.9297 |
| Listeria_monocytogenes_SLCC2372_932920                   | Listeria_monocytogenes_1639_v81 | 0.953  |
| Listeria_monocytogenes_serotype_4b_str_LL195_1230340     | Listeria_monocytogenes_1639_v81 | 0.9286 |
| Listeria_monocytogenes_serotype_4b_str_LIS0087_1134669   | Listeria_monocytogenes_1639_v81 | 0.9338 |
| Listeria_monocytogenes_serotype_4b_str_F2365_265669      | Listeria_monocytogenes_1639_v81 | 0.9286 |
| Listeria_monocytogenes_serotype_4b_str_CLIP_80459_568819 | Listeria_monocytogenes_1639_v81 | 0.9346 |
| Listeria_monocytogenes_serotype_4b_str_81-0861_1196161   | Listeria_monocytogenes_1639_v81 | 0.919  |
| Listeria_monocytogenes_serotype_4b_str_81-0592_1196160   | Listeria_monocytogenes_1639_v81 | 0.9201 |
| Listeria_monocytogenes_serotype_4b_str_81-0558_1196159   | Listeria_monocytogenes_1639_v81 | 0.9208 |
| Listeria_monocytogenes_serotype_4b_str_10-0809_1196162   | Listeria_monocytogenes_1639_v81 | 0.9201 |
| Listeria_monocytogenes_serotype_4b_str_02-6680_1196175   | Listeria_monocytogenes_1639_v81 | 0.934  |
| Listeria_monocytogenes_serotype_4b_str_02-6679_1196174   | Listeria_monocytogenes_1639_v81 | 0.934  |
| Listeria_monocytogenes_serotype_4b_str_02-1792_1196173   | Listeria_monocytogenes_1639_v81 | 0.9219 |
| Listeria_monocytogenes_serotype_4b_str_02-1289_1196172   | Listeria_monocytogenes_1639_v81 | 0.9219 |
| Listeria_monocytogenes_serotype_4b_str_02-1103_1196171   | Listeria_monocytogenes_1639_v81 | 0.9219 |
| Listeria_monocytogenes_serotype_3c_str_10-5027_1196195   | Listeria_monocytogenes_1639_v81 | 0.9612 |
| Listeria_monocytogenes_serotype_1_2c_str_10-5026_1196194 | Listeria_monocytogenes_1639_v81 | 0.9623 |
| Listeria_monocytogenes_serotype_1_2c_str_10-5025_1196193 | Listeria_monocytogenes_1639_v81 | 0.9623 |
| Listeria_monocytogenes_serotype_1_2b_str_10-0811_1196164 | Listeria_monocytogenes_1639_v81 | 0.9391 |
| Listeria_monocytogenes_serotype_1_2b_str_10-0810_1196163 | Listeria_monocytogenes_1639_v81 | 0.9391 |
| Listeria_monocytogenes_serotype_1_2a_str_99-6370_1196179 | Listeria_monocytogenes_1639_v81 | 0.9551 |
| Listeria_monocytogenes_serotype_1_2a_str_98-2035_1196178 | Listeria_monocytogenes_1639_v81 | 0.9551 |
| Listeria_monocytogenes_serotype_1_2a_str_95-0093_1196177 | Listeria_monocytogenes_1639_v81 | 0.9604 |
| Listeria_monocytogenes_serotype_1_2a_str_88-0478_1196176 | Listeria_monocytogenes_1639_v81 | 0.9611 |
| Listeria_monocytogenes_serotype_1_2a_str_10-5024_1196192 | Listeria_monocytogenes_1639_v81 | 0.9607 |
| Listeria_monocytogenes_serotype_1_2a_str_10-4758_1196168 | Listeria_monocytogenes_1639_v81 | 0.9597 |
| Listeria_monocytogenes_serotype_1_2a_str_10-4754_1196167 | Listeria_monocytogenes_1639_v81 | 0.9597 |
| Listeria_monocytogenes_serotype_1_2a_str_10-1321_1196191 | Listeria_monocytogenes_1639_v81 | 0.9607 |
| Listeria_monocytogenes_serotype_1_2a_str_10-1047_1196190 | Listeria_monocytogenes_1639_v81 | 0.9604 |
| Listeria_monocytogenes_serotype_1_2a_str_10-1046_1196189 | Listeria_monocytogenes_1639_v81 | 0.9604 |
| Listeria_monocytogenes_serotype_1_2a_str_10-0934_1196170 | Listeria_monocytogenes_1639_v81 | 0.9523 |
| Listeria_monocytogenes_serotype_1_2a_str_10-0933_1196169 | Listeria_monocytogenes_1639_v81 | 0.9523 |
| Listeria_monocytogenes_serotype_1_2a_str_10-0815_1196188 | Listeria_monocytogenes_1639_v81 | 0.9558 |
| Listeria_monocytogenes_serotype_1_2a_str_10-0814_1196187 | Listeria_monocytogenes_1639_v81 | 0.9604 |
| Listeria_monocytogenes_serotype_1_2a_str_10-0813_1196166 | Listeria_monocytogenes_1639_v81 | 0.9555 |
| Listeria_monocytogenes_serotype_1_2a_str_10-0812_1196165 | Listeria_monocytogenes_1639_v81 | 0.9555 |
| Listeria_monocytogenes_serotype_1_2a_str_08-7669_1196186 | Listeria_monocytogenes_1639_v81 | 0.9555 |
| Listeria_monocytogenes_serotype_1_2a_str_08-7374_1196185 | Listeria_monocytogenes_1639_v81 | 0.9607 |
| Listeria_monocytogenes_serotype_1_2a_str_08-6997_1196184 | Listeria_monocytogenes_1639_v81 | 0.9558 |
| Listeria_monocytogenes_serotype_1_2a_str_08-6569_1196183 | Listeria_monocytogenes_1639_v81 | 0.9558 |
| Listeria_monocytogenes_serotype_1_2a_str_08-6056_1196182 | Listeria_monocytogenes_1639_v81 | 0.9558 |
| Listeria_monocytogenes_serotype_1_2a_str_04-5457_1196181 | Listeria_monocytogenes_1639_v81 | 0.9607 |
| Listeria_monocytogenes_serotype_1_2a_str_02-5993_1196180 | Listeria_monocytogenes_1639_v81 | 0.9604 |
| Listeria_monocytogenes_R479a_1437838                     | Listeria_monocytogenes_1639_v81 | 0.9604 |
| Listeria_monocytogenes_N53-1_1234142                     | Listeria_monocytogenes_1639_v81 | 0.9    |
| Listeria_monocytogenes_M7_1030009                        | Listeria_monocytogenes_1639_v81 | 0.9109 |
| Listeria_monocytogenes_LO28_393132                       | Listeria_monocytogenes_1639_v81 | 0.9535 |
| Listeria_monocytogenes_L99_563174                        | Listeria_monocytogenes_1639_v81 | 0.9116 |
| Listeria_monocytogenes_L312_882094                       | Listeria_monocytogenes_1639_v81 | 0.9346 |
| Listeria_monocytogenes_J1816_930781                      | Listeria_monocytogenes_1639_v81 | 0.9263 |
| Listeria_monocytogenes_J1-220_930782                     | Listeria_monocytogenes_1639_v81 | 0.9259 |
| Listeria_monocytogenes_J0161_393130                      | Listeria_monocytogenes_1639_v81 | 0.9538 |
| Listeria_monocytogenes_HCC23_552536                      | Listeria_monocytogenes_1639_v81 | 0.9109 |
| Listeria_monocytogenes_FSL_R2-561_393126                 | Listeria_monocytogenes_1639_v81 | 0.962  |
| Listeria_monocytogenes_FSL_J1-208_393119                 | Listeria_monocytogenes_1639_v81 | 0.8948 |
| Listeria_monocytogenes_FSL_J1-175_393118                 | Listeria_monocytogenes_1639_v81 | 0.9423 |
| Listeria_monocytogenes_Finland_1998_393127               | Listeria_monocytogenes_1639_v81 | 0.9763 |
| Listeria_monocytogenes_EGD-e_169963_v1                   | Listeria_monocytogenes_1639_v81 | 0.9485 |
| Listeria_monocytogenes_EGD-e_169963                      | Listeria_monocytogenes_1639_v81 | 0.9485 |
| Listeria_monocytogenes_EGD_1334565                       | Listeria_monocytogenes_1639_v81 | 0.9562 |
| Listeria_monocytogenes_CFSAN002349_1299895               | Listeria_monocytogenes_1639_v81 | 0.9341 |
| Listeria_monocytogenes_ATCC_19117_882095_v1              | Listeria_monocytogenes_1639_v81 | 0.9285 |
| Listeria_monocytogenes_ATCC_19117_882095                 | Listeria_monocytogenes_1639_v81 | 0.9285 |
| Listeria_monocytogenes_6179_1288295                      | Listeria_monocytogenes_1639_v81 | 0.9504 |
| Listeria_monocytogenes_1639_v9                           | Listeria_monocytogenes_1639_v81 | 0.9301 |
| Listeria_monocytogenes_1639_v99                          | Listeria_monocytogenes_1639_v81 | 0.9275 |
| Listeria_monocytogenes_1639_v98                          | Listeria_monocytogenes_1639_v81 | 0.9482 |
| Listeria_monocytogenes_1639_v97                          | Listeria_monocytogenes_1639_v81 | 0.9325 |
| Listeria_monocytogenes_1639_v96                          | Listeria_monocytogenes_1639_v81 | 0.926  |

|                                                          |                                 |        |
|----------------------------------------------------------|---------------------------------|--------|
| Listeria_monocytogenes_1639_v95                          | Listeria_monocytogenes_1639_v81 | 0.9261 |
| Listeria_monocytogenes_1639_v94                          | Listeria_monocytogenes_1639_v81 | 0.9264 |
| Listeria_monocytogenes_1639_v93                          | Listeria_monocytogenes_1639_v81 | 0.9444 |
| Listeria_monocytogenes_1639_v92                          | Listeria_monocytogenes_1639_v81 | 0.9286 |
| Listeria_monocytogenes_1639_v91                          | Listeria_monocytogenes_1639_v81 | 0.9263 |
| Listeria_monocytogenes_1639_v90                          | Listeria_monocytogenes_1639_v81 | 0.9482 |
| Listeria_monocytogenes_1639_v8                           | Listeria_monocytogenes_1639_v81 | 0.9469 |
| Listeria_monocytogenes_1639_v89                          | Listeria_monocytogenes_1639_v81 | 0.9356 |
| Listeria_monocytogenes_1639_v88                          | Listeria_monocytogenes_1639_v81 | 0.9578 |
| Listeria_monocytogenes_1639_v87                          | Listeria_monocytogenes_1639_v81 | 0.9527 |
| Listeria_monocytogenes_1639_v86                          | Listeria_monocytogenes_1639_v81 | 0.9524 |
| Listeria_monocytogenes_1639_v85                          | Listeria_monocytogenes_1639_v81 | 0.9187 |
| Listeria_monocytogenes_1639_v84                          | Listeria_monocytogenes_1639_v81 | 0.9629 |
| Listeria_monocytogenes_1639_v83                          | Listeria_monocytogenes_1639_v81 | 0.9222 |
| Listeria_monocytogenes_1639_v82                          | Listeria_monocytogenes_1639_v81 | 0.9219 |
| Listeria_monocytogenes_1639_v81                          | Listeria_monocytogenes_1639_v81 | 0.0684 |
| Listeria_welshimeri_1643                                 | Listeria_monocytogenes_1639_v82 | 0.8822 |
| Listeria_welshimeri_serovar_6b_str_SLCC5334_386043       | Listeria_monocytogenes_1639_v82 | 0.8818 |
| Listeria_seeligeri_serovar_1_2b_str_SLCC3954_683837      | Listeria_monocytogenes_1639_v82 | 0.8778 |
| Listeria_seeligeri_FSL_S4-171_702452                     | Listeria_monocytogenes_1639_v82 | 0.8227 |
| Listeria_seeligeri_FSL_N1-067_702453                     | Listeria_monocytogenes_1639_v82 | 0.8245 |
| Listeria_seeligeri_1640_v1                               | Listeria_monocytogenes_1639_v82 | 0.8839 |
| Listeria_seeligeri_1640                                  | Listeria_monocytogenes_1639_v82 | 0.8791 |
| Listeria_monocytogenes_WSLC1042_1457188                  | Listeria_monocytogenes_1639_v82 | 0.9687 |
| Listeria_monocytogenes_WSLC1001_1457187                  | Listeria_monocytogenes_1639_v82 | 0.9235 |
| Listeria_monocytogenes_SLCC7179_879090                   | Listeria_monocytogenes_1639_v82 | 0.9375 |
| Listeria_monocytogenes_SLCC5850_882096                   | Listeria_monocytogenes_1639_v82 | 0.9273 |
| Listeria_monocytogenes_SLCC2755_932919                   | Listeria_monocytogenes_1639_v82 | 0.9338 |
| Listeria_monocytogenes_SLCC2540_879089                   | Listeria_monocytogenes_1639_v82 | 0.9384 |
| Listeria_monocytogenes_SLCC2479_882020                   | Listeria_monocytogenes_1639_v82 | 0.9202 |
| Listeria_monocytogenes_SLCC2378_879088                   | Listeria_monocytogenes_1639_v82 | 0.9698 |
| Listeria_monocytogenes_SLCC2376_882097                   | Listeria_monocytogenes_1639_v82 | 0.9305 |
| Listeria_monocytogenes_SLCC2372_932920                   | Listeria_monocytogenes_1639_v82 | 0.9131 |
| Listeria_monocytogenes_serotype_4b_str_LL195_1230340     | Listeria_monocytogenes_1639_v82 | 0.9651 |
| Listeria_monocytogenes_serotype_4b_str_LIS0087_1134669   | Listeria_monocytogenes_1639_v82 | 0.914  |
| Listeria_monocytogenes_serotype_4b_str_F2365_265669      | Listeria_monocytogenes_1639_v82 | 0.9651 |
| Listeria_monocytogenes_serotype_4b_str_CLIP_80459_568819 | Listeria_monocytogenes_1639_v82 | 0.9605 |
| Listeria_monocytogenes_serotype_4b_str_81-0861_1196161   | Listeria_monocytogenes_1639_v82 | 0.975  |
| Listeria_monocytogenes_serotype_4b_str_81-0592_1196160   | Listeria_monocytogenes_1639_v82 | 0.9761 |
| Listeria_monocytogenes_serotype_4b_str_81-0558_1196159   | Listeria_monocytogenes_1639_v82 | 0.9753 |
| Listeria_monocytogenes_serotype_4b_str_10-0809_1196162   | Listeria_monocytogenes_1639_v82 | 0.9761 |
| Listeria_monocytogenes_serotype_4b_str_02-6680_1196175   | Listeria_monocytogenes_1639_v82 | 0.9674 |
| Listeria_monocytogenes_serotype_4b_str_02-6679_1196174   | Listeria_monocytogenes_1639_v82 | 0.9674 |
| Listeria_monocytogenes_serotype_4b_str_02-1792_1196173   | Listeria_monocytogenes_1639_v82 | 0.975  |
| Listeria_monocytogenes_serotype_4b_str_02-1289_1196172   | Listeria_monocytogenes_1639_v82 | 0.975  |
| Listeria_monocytogenes_serotype_4b_str_02-1103_1196171   | Listeria_monocytogenes_1639_v82 | 0.975  |
| Listeria_monocytogenes_serotype_3c_str_10-5027_1196195   | Listeria_monocytogenes_1639_v82 | 0.9202 |
| Listeria_monocytogenes_serotype_1_2c_str_10-5026_1196194 | Listeria_monocytogenes_1639_v82 | 0.921  |
| Listeria_monocytogenes_serotype_1_2c_str_10-5025_1196193 | Listeria_monocytogenes_1639_v82 | 0.921  |
| Listeria_monocytogenes_serotype_1_2b_str_10-0811_1196164 | Listeria_monocytogenes_1639_v82 | 0.9436 |
| Listeria_monocytogenes_serotype_1_2b_str_10-0810_1196163 | Listeria_monocytogenes_1639_v82 | 0.9436 |
| Listeria_monocytogenes_serotype_1_2a_str_99-6370_1196179 | Listeria_monocytogenes_1639_v82 | 0.9113 |
| Listeria_monocytogenes_serotype_1_2a_str_98-2035_1196178 | Listeria_monocytogenes_1639_v82 | 0.9113 |
| Listeria_monocytogenes_serotype_1_2a_str_95-0093_1196177 | Listeria_monocytogenes_1639_v82 | 0.9156 |
| Listeria_monocytogenes_serotype_1_2a_str_88-0478_1196176 | Listeria_monocytogenes_1639_v82 | 0.9152 |
| Listeria_monocytogenes_serotype_1_2a_str_10-5024_1196192 | Listeria_monocytogenes_1639_v82 | 0.9156 |
| Listeria_monocytogenes_serotype_1_2a_str_10-4758_1196168 | Listeria_monocytogenes_1639_v82 | 0.9292 |
| Listeria_monocytogenes_serotype_1_2a_str_10-4754_1196167 | Listeria_monocytogenes_1639_v82 | 0.9296 |
| Listeria_monocytogenes_serotype_1_2a_str_10-1321_1196191 | Listeria_monocytogenes_1639_v82 | 0.9156 |
| Listeria_monocytogenes_serotype_1_2a_str_10-1047_1196190 | Listeria_monocytogenes_1639_v82 | 0.9159 |
| Listeria_monocytogenes_serotype_1_2a_str_10-1046_1196189 | Listeria_monocytogenes_1639_v82 | 0.9159 |
| Listeria_monocytogenes_serotype_1_2a_str_10-0934_1196170 | Listeria_monocytogenes_1639_v82 | 0.9348 |
| Listeria_monocytogenes_serotype_1_2a_str_10-0933_1196169 | Listeria_monocytogenes_1639_v82 | 0.9348 |
| Listeria_monocytogenes_serotype_1_2a_str_10-0815_1196188 | Listeria_monocytogenes_1639_v82 | 0.9119 |
| Listeria_monocytogenes_serotype_1_2a_str_10-0814_1196187 | Listeria_monocytogenes_1639_v82 | 0.916  |
| Listeria_monocytogenes_serotype_1_2a_str_10-0813_1196166 | Listeria_monocytogenes_1639_v82 | 0.9297 |
| Listeria_monocytogenes_serotype_1_2a_str_10-0812_1196165 | Listeria_monocytogenes_1639_v82 | 0.9297 |
| Listeria_monocytogenes_serotype_1_2a_str_08-7669_1196186 | Listeria_monocytogenes_1639_v82 | 0.9244 |
| Listeria_monocytogenes_serotype_1_2a_str_08-7374_1196185 | Listeria_monocytogenes_1639_v82 | 0.9156 |
| Listeria_monocytogenes_serotype_1_2a_str_08-6997_1196184 | Listeria_monocytogenes_1639_v82 | 0.9119 |
| Listeria_monocytogenes_serotype_1_2a_str_08-6569_1196183 | Listeria_monocytogenes_1639_v82 | 0.9119 |
| Listeria_monocytogenes_serotype_1_2a_str_08-6056_1196182 | Listeria_monocytogenes_1639_v82 | 0.9119 |
| Listeria_monocytogenes_serotype_1_2a_str_04-5457_1196181 | Listeria_monocytogenes_1639_v82 | 0.9156 |
| Listeria_monocytogenes_serotype_1_2a_str_02-5993_1196180 | Listeria_monocytogenes_1639_v82 | 0.9156 |
| Listeria_monocytogenes_R479a_1437838                     | Listeria_monocytogenes_1639_v82 | 0.9145 |
| Listeria_monocytogenes_N53-1_1234142                     | Listeria_monocytogenes_1639_v82 | 0.888  |
| Listeria_monocytogenes_M7_1030009                        | Listeria_monocytogenes_1639_v82 | 0.9098 |
| Listeria_monocytogenes_LO28_393132                       | Listeria_monocytogenes_1639_v82 | 0.9278 |
| Listeria_monocytogenes_L99_563174                        | Listeria_monocytogenes_1639_v82 | 0.9101 |
| Listeria_monocytogenes_L312_882094                       | Listeria_monocytogenes_1639_v82 | 0.9609 |
| Listeria_monocytogenes_J1816_930781                      | Listeria_monocytogenes_1639_v82 | 0.9479 |
| Listeria_monocytogenes_J1-220_930782                     | Listeria_monocytogenes_1639_v82 | 0.983  |
| Listeria_monocytogenes_J0161_393130                      | Listeria_monocytogenes_1639_v82 | 0.9323 |
| Listeria_monocytogenes_HCC23_552536                      | Listeria_monocytogenes_1639_v82 | 0.9094 |
| Listeria_monocytogenes_FSL_R2-561_393126                 | Listeria_monocytogenes_1639_v82 | 0.9181 |
| Listeria_monocytogenes_FSL_J1-208_393119                 | Listeria_monocytogenes_1639_v82 | 0.911  |
| Listeria_monocytogenes_FSL_J1-175_393118                 | Listeria_monocytogenes_1639_v82 | 0.9465 |
| Listeria_monocytogenes_Finland_1998_393127               | Listeria_monocytogenes_1639_v82 | 0.9363 |
| Listeria_monocytogenes_EGD-e_169963_v1                   | Listeria_monocytogenes_1639_v82 | 0.935  |
| Listeria_monocytogenes_EGD-e_169963                      | Listeria_monocytogenes_1639_v82 | 0.9353 |
| Listeria_monocytogenes_EGD_1334565                       | Listeria_monocytogenes_1639_v82 | 0.928  |

|                                                          |                                 |        |
|----------------------------------------------------------|---------------------------------|--------|
| Listeria_monocytogenes_CFSAN002349_1299895               | Listeria_monocytogenes_1639_v82 | 0.9606 |
| Listeria_monocytogenes_ATCC_19117_882095_v1              | Listeria_monocytogenes_1639_v82 | 0.9875 |
| Listeria_monocytogenes_ATCC_19117_882095                 | Listeria_monocytogenes_1639_v82 | 0.9871 |
| Listeria_monocytogenes_6179_1288295                      | Listeria_monocytogenes_1639_v82 | 0.9156 |
| Listeria_monocytogenes_1639_v9                           | Listeria_monocytogenes_1639_v82 | 0.9297 |
| Listeria_monocytogenes_1639_v99                          | Listeria_monocytogenes_1639_v82 | 0.9472 |
| Listeria_monocytogenes_1639_v98                          | Listeria_monocytogenes_1639_v82 | 0.9281 |
| Listeria_monocytogenes_1639_v97                          | Listeria_monocytogenes_1639_v82 | 0.9591 |
| Listeria_monocytogenes_1639_v96                          | Listeria_monocytogenes_1639_v82 | 0.9476 |
| Listeria_monocytogenes_1639_v95                          | Listeria_monocytogenes_1639_v82 | 0.9476 |
| Listeria_monocytogenes_1639_v94                          | Listeria_monocytogenes_1639_v82 | 0.948  |
| Listeria_monocytogenes_1639_v93                          | Listeria_monocytogenes_1639_v82 | 0.9152 |
| Listeria_monocytogenes_1639_v92                          | Listeria_monocytogenes_1639_v82 | 0.9476 |
| Listeria_monocytogenes_1639_v91                          | Listeria_monocytogenes_1639_v82 | 0.9617 |
| Listeria_monocytogenes_1639_v90                          | Listeria_monocytogenes_1639_v82 | 0.9281 |
| Listeria_monocytogenes_1639_v8                           | Listeria_monocytogenes_1639_v82 | 0.9071 |
| Listeria_monocytogenes_1639_v89                          | Listeria_monocytogenes_1639_v82 | 0.9673 |
| Listeria_monocytogenes_1639_v88                          | Listeria_monocytogenes_1639_v82 | 0.9208 |
| Listeria_monocytogenes_1639_v87                          | Listeria_monocytogenes_1639_v82 | 0.9267 |
| Listeria_monocytogenes_1639_v86                          | Listeria_monocytogenes_1639_v82 | 0.9263 |
| Listeria_monocytogenes_1639_v85                          | Listeria_monocytogenes_1639_v82 | 0.975  |
| Listeria_monocytogenes_1639_v84                          | Listeria_monocytogenes_1639_v82 | 0.927  |
| Listeria_monocytogenes_1639_v83                          | Listeria_monocytogenes_1639_v82 | 0.9993 |
| Listeria_monocytogenes_1639_v82                          | Listeria_monocytogenes_1639_v82 | 0.0688 |
| Listeria_welshimeri_1643                                 | Listeria_monocytogenes_1639_v83 | 0.8825 |
| Listeria_welshimeri_serovar_6b_str_SLCC5334_386043       | Listeria_monocytogenes_1639_v83 | 0.8821 |
| Listeria_seeligeri_serovar_1_2b_str_SLCC3954_683837      | Listeria_monocytogenes_1639_v83 | 0.8781 |
| Listeria_seeligeri_FSL_S4-171_702452                     | Listeria_monocytogenes_1639_v83 | 0.8229 |
| Listeria_seeligeri_FSL_N1-067_702453                     | Listeria_monocytogenes_1639_v83 | 0.8247 |
| Listeria_seeligeri_1640_v1                               | Listeria_monocytogenes_1639_v83 | 0.8842 |
| Listeria_seeligeri_1640                                  | Listeria_monocytogenes_1639_v83 | 0.8794 |
| Listeria_monocytogenes_WSLC1042_1457188                  | Listeria_monocytogenes_1639_v83 | 0.9695 |
| Listeria_monocytogenes_WSLC1001_1457187                  | Listeria_monocytogenes_1639_v83 | 0.9238 |
| Listeria_monocytogenes_SLCC7179_879090                   | Listeria_monocytogenes_1639_v83 | 0.9382 |
| Listeria_monocytogenes_SLCC5850_882096                   | Listeria_monocytogenes_1639_v83 | 0.9276 |
| Listeria_monocytogenes_SLCC2755_932919                   | Listeria_monocytogenes_1639_v83 | 0.9342 |
| Listeria_monocytogenes_SLCC2540_879089                   | Listeria_monocytogenes_1639_v83 | 0.9391 |
| Listeria_monocytogenes_SLCC2479_882020                   | Listeria_monocytogenes_1639_v83 | 0.9206 |
| Listeria_monocytogenes_SLCC2378_879088                   | Listeria_monocytogenes_1639_v83 | 0.9706 |
| Listeria_monocytogenes_SLCC2376_882097                   | Listeria_monocytogenes_1639_v83 | 0.9308 |
| Listeria_monocytogenes_SLCC2372_932920                   | Listeria_monocytogenes_1639_v83 | 0.9134 |
| Listeria_monocytogenes_serotype_4b_str_LL195_1230340     | Listeria_monocytogenes_1639_v83 | 0.9658 |
| Listeria_monocytogenes_serotype_4b_str_LIS0087_1134669   | Listeria_monocytogenes_1639_v83 | 0.9144 |
| Listeria_monocytogenes_serotype_4b_str_F2365_265669      | Listeria_monocytogenes_1639_v83 | 0.9658 |
| Listeria_monocytogenes_serotype_4b_str_CLIP_80459_568819 | Listeria_monocytogenes_1639_v83 | 0.9612 |
| Listeria_monocytogenes_serotype_4b_str_81-0861_1196161   | Listeria_monocytogenes_1639_v83 | 0.9757 |
| Listeria_monocytogenes_serotype_4b_str_81-0592_1196160   | Listeria_monocytogenes_1639_v83 | 0.9768 |
| Listeria_monocytogenes_serotype_4b_str_81-0558_1196159   | Listeria_monocytogenes_1639_v83 | 0.9761 |
| Listeria_monocytogenes_serotype_4b_str_10-0809_1196162   | Listeria_monocytogenes_1639_v83 | 0.9768 |
| Listeria_monocytogenes_serotype_4b_str_02-6680_1196175   | Listeria_monocytogenes_1639_v83 | 0.9677 |
| Listeria_monocytogenes_serotype_4b_str_02-6679_1196174   | Listeria_monocytogenes_1639_v83 | 0.9677 |
| Listeria_monocytogenes_serotype_4b_str_02-1792_1196173   | Listeria_monocytogenes_1639_v83 | 0.9757 |
| Listeria_monocytogenes_serotype_4b_str_02-1289_1196172   | Listeria_monocytogenes_1639_v83 | 0.9757 |
| Listeria_monocytogenes_serotype_4b_str_02-1103_1196171   | Listeria_monocytogenes_1639_v83 | 0.9757 |
| Listeria_monocytogenes_serotype_3c_str_10-5027_1196195   | Listeria_monocytogenes_1639_v83 | 0.9205 |
| Listeria_monocytogenes_serotype_1_2c_str_10-5026_1196194 | Listeria_monocytogenes_1639_v83 | 0.9213 |
| Listeria_monocytogenes_serotype_1_2c_str_10-5025_1196193 | Listeria_monocytogenes_1639_v83 | 0.9213 |
| Listeria_monocytogenes_serotype_1_2b_str_10-0811_1196164 | Listeria_monocytogenes_1639_v83 | 0.9439 |
| Listeria_monocytogenes_serotype_1_2b_str_10-0810_1196163 | Listeria_monocytogenes_1639_v83 | 0.9439 |
| Listeria_monocytogenes_serotype_1_2a_str_99-6370_1196179 | Listeria_monocytogenes_1639_v83 | 0.9116 |
| Listeria_monocytogenes_serotype_1_2a_str_98-2035_1196178 | Listeria_monocytogenes_1639_v83 | 0.9116 |
| Listeria_monocytogenes_serotype_1_2a_str_95-0093_1196177 | Listeria_monocytogenes_1639_v83 | 0.9159 |
| Listeria_monocytogenes_serotype_1_2a_str_88-0478_1196176 | Listeria_monocytogenes_1639_v83 | 0.9155 |
| Listeria_monocytogenes_serotype_1_2a_str_10-5024_1196192 | Listeria_monocytogenes_1639_v83 | 0.9159 |
| Listeria_monocytogenes_serotype_1_2a_str_10-4758_1196168 | Listeria_monocytogenes_1639_v83 | 0.9299 |
| Listeria_monocytogenes_serotype_1_2a_str_10-4754_1196167 | Listeria_monocytogenes_1639_v83 | 0.9303 |
| Listeria_monocytogenes_serotype_1_2a_str_10-1321_1196191 | Listeria_monocytogenes_1639_v83 | 0.9159 |
| Listeria_monocytogenes_serotype_1_2a_str_10-1047_1196190 | Listeria_monocytogenes_1639_v83 | 0.9162 |
| Listeria_monocytogenes_serotype_1_2a_str_10-1046_1196189 | Listeria_monocytogenes_1639_v83 | 0.9162 |
| Listeria_monocytogenes_serotype_1_2a_str_10-0934_1196170 | Listeria_monocytogenes_1639_v83 | 0.9355 |
| Listeria_monocytogenes_serotype_1_2a_str_10-0933_1196169 | Listeria_monocytogenes_1639_v83 | 0.9355 |
| Listeria_monocytogenes_serotype_1_2a_str_10-0815_1196188 | Listeria_monocytogenes_1639_v83 | 0.9122 |
| Listeria_monocytogenes_serotype_1_2a_str_10-0814_1196187 | Listeria_monocytogenes_1639_v83 | 0.9163 |
| Listeria_monocytogenes_serotype_1_2a_str_10-0813_1196166 | Listeria_monocytogenes_1639_v83 | 0.93   |
| Listeria_monocytogenes_serotype_1_2a_str_10-0812_1196165 | Listeria_monocytogenes_1639_v83 | 0.93   |
| Listeria_monocytogenes_serotype_1_2a_str_08-7669_1196186 | Listeria_monocytogenes_1639_v83 | 0.9247 |
| Listeria_monocytogenes_serotype_1_2a_str_08-7374_1196185 | Listeria_monocytogenes_1639_v83 | 0.9159 |
| Listeria_monocytogenes_serotype_1_2a_str_08-6997_1196184 | Listeria_monocytogenes_1639_v83 | 0.9122 |
| Listeria_monocytogenes_serotype_1_2a_str_08-6569_1196183 | Listeria_monocytogenes_1639_v83 | 0.9122 |
| Listeria_monocytogenes_serotype_1_2a_str_08-6056_1196182 | Listeria_monocytogenes_1639_v83 | 0.9122 |
| Listeria_monocytogenes_serotype_1_2a_str_04-5457_1196181 | Listeria_monocytogenes_1639_v83 | 0.9159 |
| Listeria_monocytogenes_serotype_1_2a_str_02-5993_1196180 | Listeria_monocytogenes_1639_v83 | 0.9159 |
| Listeria_monocytogenes_R479a_1437838                     | Listeria_monocytogenes_1639_v83 | 0.9148 |
| Listeria_monocytogenes_N53-1_1234142                     | Listeria_monocytogenes_1639_v83 | 0.8887 |
| Listeria_monocytogenes_M7_1030009                        | Listeria_monocytogenes_1639_v83 | 0.9105 |
| Listeria_monocytogenes_LO28_393132                       | Listeria_monocytogenes_1639_v83 | 0.9281 |
| Listeria_monocytogenes_L99_563174                        | Listeria_monocytogenes_1639_v83 | 0.9108 |
| Listeria_monocytogenes_L312_882094                       | Listeria_monocytogenes_1639_v83 | 0.9616 |
| Listeria_monocytogenes_J1816_930781                      | Listeria_monocytogenes_1639_v83 | 0.9483 |
| Listeria_monocytogenes_J1-220_930782                     | Listeria_monocytogenes_1639_v83 | 0.9837 |
| Listeria_monocytogenes_J0161_393130                      | Listeria_monocytogenes_1639_v83 | 0.933  |

|                                                          |                                 |        |
|----------------------------------------------------------|---------------------------------|--------|
| Listeria_monocytogenes_HCC23_552536                      | Listeria_monocytogenes_1639_v83 | 0.9101 |
| Listeria_monocytogenes_FSL_R2-561_393126                 | Listeria_monocytogenes_1639_v83 | 0.9184 |
| Listeria_monocytogenes_FSL_J1-208_393119                 | Listeria_monocytogenes_1639_v83 | 0.9117 |
| Listeria_monocytogenes_FSL_J1-175_393118                 | Listeria_monocytogenes_1639_v83 | 0.9472 |
| Listeria_monocytogenes_Finland_1998_393127               | Listeria_monocytogenes_1639_v83 | 0.9366 |
| Listeria_monocytogenes_EGD-e_169963_v1                   | Listeria_monocytogenes_1639_v83 | 0.9353 |
| Listeria_monocytogenes_EGD-e_169963                      | Listeria_monocytogenes_1639_v83 | 0.9357 |
| Listeria_monocytogenes_EGD_1334565                       | Listeria_monocytogenes_1639_v83 | 0.9283 |
| Listeria_monocytogenes_CFSAN002349_1299895               | Listeria_monocytogenes_1639_v83 | 0.9613 |
| Listeria_monocytogenes_ATCC_19117_882095_v1              | Listeria_monocytogenes_1639_v83 | 0.9883 |
| Listeria_monocytogenes_ATCC_19117_882095                 | Listeria_monocytogenes_1639_v83 | 0.9879 |
| Listeria_monocytogenes_6179_1288295                      | Listeria_monocytogenes_1639_v83 | 0.9163 |
| Listeria_monocytogenes_1639_v9                           | Listeria_monocytogenes_1639_v83 | 0.93   |
| Listeria_monocytogenes_1639_v99                          | Listeria_monocytogenes_1639_v83 | 0.9479 |
| Listeria_monocytogenes_1639_v98                          | Listeria_monocytogenes_1639_v83 | 0.9284 |
| Listeria_monocytogenes_1639_v97                          | Listeria_monocytogenes_1639_v83 | 0.9599 |
| Listeria_monocytogenes_1639_v96                          | Listeria_monocytogenes_1639_v83 | 0.9483 |
| Listeria_monocytogenes_1639_v95                          | Listeria_monocytogenes_1639_v83 | 0.9483 |
| Listeria_monocytogenes_1639_v94                          | Listeria_monocytogenes_1639_v83 | 0.9487 |
| Listeria_monocytogenes_1639_v93                          | Listeria_monocytogenes_1639_v83 | 0.9155 |
| Listeria_monocytogenes_1639_v92                          | Listeria_monocytogenes_1639_v83 | 0.9483 |
| Listeria_monocytogenes_1639_v91                          | Listeria_monocytogenes_1639_v83 | 0.9624 |
| Listeria_monocytogenes_1639_v90                          | Listeria_monocytogenes_1639_v83 | 0.9284 |
| Listeria_monocytogenes_1639_v8                           | Listeria_monocytogenes_1639_v83 | 0.9074 |
| Listeria_monocytogenes_1639_v89                          | Listeria_monocytogenes_1639_v83 | 0.9676 |
| Listeria_monocytogenes_1639_v88                          | Listeria_monocytogenes_1639_v83 | 0.9215 |
| Listeria_monocytogenes_1639_v87                          | Listeria_monocytogenes_1639_v83 | 0.927  |
| Listeria_monocytogenes_1639_v86                          | Listeria_monocytogenes_1639_v83 | 0.9266 |
| Listeria_monocytogenes_1639_v85                          | Listeria_monocytogenes_1639_v83 | 0.9754 |
| Listeria_monocytogenes_1639_v84                          | Listeria_monocytogenes_1639_v83 | 0.9277 |
| Listeria_monocytogenes_1639_v83                          | Listeria_monocytogenes_1639_v83 | 0.0689 |
| Listeria_welshimeri_1643                                 | Listeria_monocytogenes_1639_v84 | 0.87   |
| Listeria_welshimeri_serovar_6b_str_SLCC5334_386043       | Listeria_monocytogenes_1639_v84 | 0.8694 |
| Listeria_seeligeri_serovar_1_2b_str_SLCC3954_683837      | Listeria_monocytogenes_1639_v84 | 0.8756 |
| Listeria_seeligeri_FSL_S4-171_702452                     | Listeria_monocytogenes_1639_v84 | 0.8222 |
| Listeria_seeligeri_FSL_N1-067_702453                     | Listeria_monocytogenes_1639_v84 | 0.8384 |
| Listeria_seeligeri_1640_v1                               | Listeria_monocytogenes_1639_v84 | 0.8741 |
| Listeria_seeligeri_1640                                  | Listeria_monocytogenes_1639_v84 | 0.8761 |
| Listeria_monocytogenes_WSLC1042_1457188                  | Listeria_monocytogenes_1639_v84 | 0.926  |
| Listeria_monocytogenes_WSLC1001_1457187                  | Listeria_monocytogenes_1639_v84 | 0.9616 |
| Listeria_monocytogenes_SLCC7179_879090                   | Listeria_monocytogenes_1639_v84 | 0.9533 |
| Listeria_monocytogenes_SLCC5850_882096                   | Listeria_monocytogenes_1639_v84 | 0.9615 |
| Listeria_monocytogenes_SLCC2755_932919                   | Listeria_monocytogenes_1639_v84 | 0.9258 |
| Listeria_monocytogenes_SLCC2540_879089                   | Listeria_monocytogenes_1639_v84 | 0.9439 |
| Listeria_monocytogenes_SLCC2479_882020                   | Listeria_monocytogenes_1639_v84 | 0.9638 |
| Listeria_monocytogenes_SLCC2378_879088                   | Listeria_monocytogenes_1639_v84 | 0.9274 |
| Listeria_monocytogenes_SLCC2376_882097                   | Listeria_monocytogenes_1639_v84 | 0.9315 |
| Listeria_monocytogenes_SLCC2372_932920                   | Listeria_monocytogenes_1639_v84 | 0.9566 |
| Listeria_monocytogenes_serotype_4b_str_LL195_1230340     | Listeria_monocytogenes_1639_v84 | 0.9334 |
| Listeria_monocytogenes_serotype_4b_str_LIS0087_1134669   | Listeria_monocytogenes_1639_v84 | 0.9443 |
| Listeria_monocytogenes_serotype_4b_str_F2365_265669      | Listeria_monocytogenes_1639_v84 | 0.9334 |
| Listeria_monocytogenes_serotype_4b_str_CLIP_80459_568819 | Listeria_monocytogenes_1639_v84 | 0.9409 |
| Listeria_monocytogenes_serotype_4b_str_81-0861_1196161   | Listeria_monocytogenes_1639_v84 | 0.923  |
| Listeria_monocytogenes_serotype_4b_str_81-0592_1196160   | Listeria_monocytogenes_1639_v84 | 0.924  |
| Listeria_monocytogenes_serotype_4b_str_81-0558_1196159   | Listeria_monocytogenes_1639_v84 | 0.9247 |
| Listeria_monocytogenes_serotype_4b_str_10-0809_1196162   | Listeria_monocytogenes_1639_v84 | 0.924  |
| Listeria_monocytogenes_serotype_4b_str_02-6680_1196175   | Listeria_monocytogenes_1639_v84 | 0.9373 |
| Listeria_monocytogenes_serotype_4b_str_02-6679_1196174   | Listeria_monocytogenes_1639_v84 | 0.9373 |
| Listeria_monocytogenes_serotype_4b_str_02-1792_1196173   | Listeria_monocytogenes_1639_v84 | 0.9255 |
| Listeria_monocytogenes_serotype_4b_str_02-1289_1196172   | Listeria_monocytogenes_1639_v84 | 0.9255 |
| Listeria_monocytogenes_serotype_4b_str_02-1103_1196171   | Listeria_monocytogenes_1639_v84 | 0.9255 |
| Listeria_monocytogenes_serotype_3c_str_10-5027_1196195   | Listeria_monocytogenes_1639_v84 | 0.9604 |
| Listeria_monocytogenes_serotype_1_2c_str_10-5026_1196194 | Listeria_monocytogenes_1639_v84 | 0.9615 |
| Listeria_monocytogenes_serotype_1_2c_str_10-5025_1196193 | Listeria_monocytogenes_1639_v84 | 0.9615 |
| Listeria_monocytogenes_serotype_1_2b_str_10-0811_1196164 | Listeria_monocytogenes_1639_v84 | 0.939  |
| Listeria_monocytogenes_serotype_1_2b_str_10-0810_1196163 | Listeria_monocytogenes_1639_v84 | 0.939  |
| Listeria_monocytogenes_serotype_1_2a_str_99-6370_1196179 | Listeria_monocytogenes_1639_v84 | 0.9517 |
| Listeria_monocytogenes_serotype_1_2a_str_98-2035_1196178 | Listeria_monocytogenes_1639_v84 | 0.9517 |
| Listeria_monocytogenes_serotype_1_2a_str_95-0093_1196177 | Listeria_monocytogenes_1639_v84 | 0.9562 |
| Listeria_monocytogenes_serotype_1_2a_str_88-0478_1196176 | Listeria_monocytogenes_1639_v84 | 0.9554 |
| Listeria_monocytogenes_serotype_1_2a_str_10-5024_1196192 | Listeria_monocytogenes_1639_v84 | 0.9569 |
| Listeria_monocytogenes_serotype_1_2a_str_10-4758_1196168 | Listeria_monocytogenes_1639_v84 | 0.966  |
| Listeria_monocytogenes_serotype_1_2a_str_10-4754_1196167 | Listeria_monocytogenes_1639_v84 | 0.966  |
| Listeria_monocytogenes_serotype_1_2a_str_10-1321_1196191 | Listeria_monocytogenes_1639_v84 | 0.9569 |
| Listeria_monocytogenes_serotype_1_2a_str_10-1047_1196190 | Listeria_monocytogenes_1639_v84 | 0.9558 |
| Listeria_monocytogenes_serotype_1_2a_str_10-1046_1196189 | Listeria_monocytogenes_1639_v84 | 0.9558 |
| Listeria_monocytogenes_serotype_1_2a_str_10-0934_1196170 | Listeria_monocytogenes_1639_v84 | 0.9576 |
| Listeria_monocytogenes_serotype_1_2a_str_10-0933_1196169 | Listeria_monocytogenes_1639_v84 | 0.9576 |
| Listeria_monocytogenes_serotype_1_2a_str_10-0815_1196188 | Listeria_monocytogenes_1639_v84 | 0.9524 |
| Listeria_monocytogenes_serotype_1_2a_str_10-0814_1196187 | Listeria_monocytogenes_1639_v84 | 0.9566 |
| Listeria_monocytogenes_serotype_1_2a_str_10-0813_1196166 | Listeria_monocytogenes_1639_v84 | 0.9565 |
| Listeria_monocytogenes_serotype_1_2a_str_10-0812_1196165 | Listeria_monocytogenes_1639_v84 | 0.9565 |
| Listeria_monocytogenes_serotype_1_2a_str_08-7669_1196186 | Listeria_monocytogenes_1639_v84 | 0.9546 |
| Listeria_monocytogenes_serotype_1_2a_str_08-7374_1196185 | Listeria_monocytogenes_1639_v84 | 0.9569 |
| Listeria_monocytogenes_serotype_1_2a_str_08-6997_1196184 | Listeria_monocytogenes_1639_v84 | 0.9524 |
| Listeria_monocytogenes_serotype_1_2a_str_08-6569_1196183 | Listeria_monocytogenes_1639_v84 | 0.9524 |
| Listeria_monocytogenes_serotype_1_2a_str_08-6056_1196182 | Listeria_monocytogenes_1639_v84 | 0.9524 |
| Listeria_monocytogenes_serotype_1_2a_str_04-5457_1196181 | Listeria_monocytogenes_1639_v84 | 0.9569 |
| Listeria_monocytogenes_serotype_1_2a_str_02-5993_1196180 | Listeria_monocytogenes_1639_v84 | 0.9566 |
| Listeria_monocytogenes_R479a_1437838                     | Listeria_monocytogenes_1639_v84 | 0.9544 |
| Listeria_monocytogenes_N53-1_1234142                     | Listeria_monocytogenes_1639_v84 | 0.9046 |



|                                                          |                                 |        |
|----------------------------------------------------------|---------------------------------|--------|
| Listeria_monocytogenes_M7_1030009                        | Listeria_monocytogenes_1639_v84 | 0.9126 |
| Listeria_monocytogenes_LO28_393132                       | Listeria_monocytogenes_1639_v84 | 0.9582 |
| Listeria_monocytogenes_L99_563174                        | Listeria_monocytogenes_1639_v84 | 0.9132 |
| Listeria_monocytogenes_L312_882094                       | Listeria_monocytogenes_1639_v84 | 0.9409 |
| Listeria_monocytogenes_J1816_930781                      | Listeria_monocytogenes_1639_v84 | 0.9299 |
| Listeria_monocytogenes_J1-220_930782                     | Listeria_monocytogenes_1639_v84 | 0.9272 |
| Listeria_monocytogenes_J0161_393130                      | Listeria_monocytogenes_1639_v84 | 0.9519 |
| Listeria_monocytogenes_HCC23_552536                      | Listeria_monocytogenes_1639_v84 | 0.9129 |
| Listeria_monocytogenes_FSL_R2-561_393126                 | Listeria_monocytogenes_1639_v84 | 0.959  |
| Listeria_monocytogenes_FSL_J1-208_393119                 | Listeria_monocytogenes_1639_v84 | 0.8972 |
| Listeria_monocytogenes_FSL_J1-175_393118                 | Listeria_monocytogenes_1639_v84 | 0.9445 |
| Listeria_monocytogenes_Finland_1998_393127               | Listeria_monocytogenes_1639_v84 | 0.9553 |
| Listeria_monocytogenes_EGD-e_169963_v1                   | Listeria_monocytogenes_1639_v84 | 0.954  |
| Listeria_monocytogenes_EGD-e_169963                      | Listeria_monocytogenes_1639_v84 | 0.954  |
| Listeria_monocytogenes_EGD_1334565                       | Listeria_monocytogenes_1639_v84 | 0.9618 |
| Listeria_monocytogenes_CFSAN002349_1299895               | Listeria_monocytogenes_1639_v84 | 0.937  |
| Listeria_monocytogenes_ATCC_19117_882095_v1              | Listeria_monocytogenes_1639_v84 | 0.9325 |
| Listeria_monocytogenes_ATCC_19117_882095                 | Listeria_monocytogenes_1639_v84 | 0.9325 |
| Listeria_monocytogenes_6179_1288295                      | Listeria_monocytogenes_1639_v84 | 0.9481 |
| Listeria_monocytogenes_1639_v9                           | Listeria_monocytogenes_1639_v84 | 0.9288 |
| Listeria_monocytogenes_1639_v99                          | Listeria_monocytogenes_1639_v84 | 0.9314 |
| Listeria_monocytogenes_1639_v98                          | Listeria_monocytogenes_1639_v84 | 0.9533 |
| Listeria_monocytogenes_1639_v97                          | Listeria_monocytogenes_1639_v84 | 0.9388 |
| Listeria_monocytogenes_1639_v96                          | Listeria_monocytogenes_1639_v84 | 0.9296 |
| Listeria_monocytogenes_1639_v95                          | Listeria_monocytogenes_1639_v84 | 0.9296 |
| Listeria_monocytogenes_1639_v94                          | Listeria_monocytogenes_1639_v84 | 0.93   |
| Listeria_monocytogenes_1639_v93                          | Listeria_monocytogenes_1639_v84 | 0.9417 |
| Listeria_monocytogenes_1639_v92                          | Listeria_monocytogenes_1639_v84 | 0.9311 |
| Listeria_monocytogenes_1639_v91                          | Listeria_monocytogenes_1639_v84 | 0.9306 |
| Listeria_monocytogenes_1639_v90                          | Listeria_monocytogenes_1639_v84 | 0.9533 |
| Listeria_monocytogenes_1639_v8                           | Listeria_monocytogenes_1639_v84 | 0.9432 |
| Listeria_monocytogenes_1639_v89                          | Listeria_monocytogenes_1639_v84 | 0.9359 |
| Listeria_monocytogenes_1639_v88                          | Listeria_monocytogenes_1639_v84 | 0.9667 |
| Listeria_monocytogenes_1639_v87                          | Listeria_monocytogenes_1639_v84 | 0.9563 |
| Listeria_monocytogenes_1639_v86                          | Listeria_monocytogenes_1639_v84 | 0.9556 |
| Listeria_monocytogenes_1639_v85                          | Listeria_monocytogenes_1639_v84 | 0.923  |
| Listeria_monocytogenes_1639_v84                          | Listeria_monocytogenes_1639_v84 | 0.0796 |
| Listeria_welshimeri_1643                                 | Listeria_monocytogenes_1639_v85 | 0.8806 |
| Listeria_welshimeri_serovar_6b_str_SLCC5334_386043       | Listeria_monocytogenes_1639_v85 | 0.8803 |
| Listeria_seeligeri_serovar_1_2b_str_SLCC3954_683837      | Listeria_monocytogenes_1639_v85 | 0.8731 |
| Listeria_seeligeri_FSL_S4-171_702452                     | Listeria_monocytogenes_1639_v85 | 0.8212 |
| Listeria_seeligeri_FSL_N1-067_702453                     | Listeria_monocytogenes_1639_v85 | 0.8245 |
| Listeria_seeligeri_1640_v1                               | Listeria_monocytogenes_1639_v85 | 0.8831 |
| Listeria_seeligeri_1640                                  | Listeria_monocytogenes_1639_v85 | 0.8805 |
| Listeria_monocytogenes_WSLC1042_1457188                  | Listeria_monocytogenes_1639_v85 | 0.9842 |
| Listeria_monocytogenes_WSLC1001_1457187                  | Listeria_monocytogenes_1639_v85 | 0.9169 |
| Listeria_monocytogenes_SLCC7179_879090                   | Listeria_monocytogenes_1639_v85 | 0.9347 |
| Listeria_monocytogenes_SLCC5850_882096                   | Listeria_monocytogenes_1639_v85 | 0.9214 |
| Listeria_monocytogenes_SLCC2755_932919                   | Listeria_monocytogenes_1639_v85 | 0.9336 |
| Listeria_monocytogenes_SLCC2540_879089                   | Listeria_monocytogenes_1639_v85 | 0.9416 |
| Listeria_monocytogenes_SLCC2479_882020                   | Listeria_monocytogenes_1639_v85 | 0.9212 |
| Listeria_monocytogenes_SLCC2378_879088                   | Listeria_monocytogenes_1639_v85 | 0.9853 |
| Listeria_monocytogenes_SLCC2376_882097                   | Listeria_monocytogenes_1639_v85 | 0.9288 |
| Listeria_monocytogenes_SLCC2372_932920                   | Listeria_monocytogenes_1639_v85 | 0.9141 |
| Listeria_monocytogenes_serotype_4b_str_LL195_1230340     | Listeria_monocytogenes_1639_v85 | 0.9799 |
| Listeria_monocytogenes_serotype_4b_str_LIS0087_1134669   | Listeria_monocytogenes_1639_v85 | 0.9082 |
| Listeria_monocytogenes_serotype_4b_str_F2365_265669      | Listeria_monocytogenes_1639_v85 | 0.9799 |
| Listeria_monocytogenes_serotype_4b_str_CLIP_80459_568819 | Listeria_monocytogenes_1639_v85 | 0.9602 |
| Listeria_monocytogenes_serotype_4b_str_81-0861_1196161   | Listeria_monocytogenes_1639_v85 | 0.9914 |
| Listeria_monocytogenes_serotype_4b_str_81-0592_1196160   | Listeria_monocytogenes_1639_v85 | 0.9926 |
| Listeria_monocytogenes_serotype_4b_str_81-0558_1196159   | Listeria_monocytogenes_1639_v85 | 0.9914 |
| Listeria_monocytogenes_serotype_4b_str_10-0809_1196162   | Listeria_monocytogenes_1639_v85 | 0.9926 |
| Listeria_monocytogenes_serotype_4b_str_02-6680_1196175   | Listeria_monocytogenes_1639_v85 | 0.961  |
| Listeria_monocytogenes_serotype_4b_str_02-6679_1196174   | Listeria_monocytogenes_1639_v85 | 0.961  |
| Listeria_monocytogenes_serotype_4b_str_02-1792_1196173   | Listeria_monocytogenes_1639_v85 | 0.9933 |
| Listeria_monocytogenes_serotype_4b_str_02-1289_1196172   | Listeria_monocytogenes_1639_v85 | 0.9933 |
| Listeria_monocytogenes_serotype_4b_str_02-1103_1196171   | Listeria_monocytogenes_1639_v85 | 0.9933 |
| Listeria_monocytogenes_serotype_3c_str_10-5027_1196195   | Listeria_monocytogenes_1639_v85 | 0.9215 |
| Listeria_monocytogenes_serotype_1_2c_str_10-5026_1196194 | Listeria_monocytogenes_1639_v85 | 0.9219 |
| Listeria_monocytogenes_serotype_1_2c_str_10-5025_1196193 | Listeria_monocytogenes_1639_v85 | 0.9219 |
| Listeria_monocytogenes_serotype_1_2b_str_10-0811_1196164 | Listeria_monocytogenes_1639_v85 | 0.9441 |
| Listeria_monocytogenes_serotype_1_2b_str_10-0810_1196163 | Listeria_monocytogenes_1639_v85 | 0.9441 |
| Listeria_monocytogenes_serotype_1_2a_str_99-6370_1196179 | Listeria_monocytogenes_1639_v85 | 0.9094 |
| Listeria_monocytogenes_serotype_1_2a_str_98-2035_1196178 | Listeria_monocytogenes_1639_v85 | 0.9094 |
| Listeria_monocytogenes_serotype_1_2a_str_95-0093_1196177 | Listeria_monocytogenes_1639_v85 | 0.914  |
| Listeria_monocytogenes_serotype_1_2a_str_88-0478_1196176 | Listeria_monocytogenes_1639_v85 | 0.9128 |
| Listeria_monocytogenes_serotype_1_2a_str_10-5024_1196192 | Listeria_monocytogenes_1639_v85 | 0.914  |
| Listeria_monocytogenes_serotype_1_2a_str_10-4758_1196168 | Listeria_monocytogenes_1639_v85 | 0.9253 |
| Listeria_monocytogenes_serotype_1_2a_str_10-4754_1196167 | Listeria_monocytogenes_1639_v85 | 0.9256 |
| Listeria_monocytogenes_serotype_1_2a_str_10-1321_1196191 | Listeria_monocytogenes_1639_v85 | 0.914  |
| Listeria_monocytogenes_serotype_1_2a_str_10-1047_1196190 | Listeria_monocytogenes_1639_v85 | 0.9146 |
| Listeria_monocytogenes_serotype_1_2a_str_10-1046_1196189 | Listeria_monocytogenes_1639_v85 | 0.9146 |
| Listeria_monocytogenes_serotype_1_2a_str_10-0934_1196170 | Listeria_monocytogenes_1639_v85 | 0.9319 |
| Listeria_monocytogenes_serotype_1_2a_str_10-0933_1196169 | Listeria_monocytogenes_1639_v85 | 0.9319 |
| Listeria_monocytogenes_serotype_1_2a_str_10-0815_1196188 | Listeria_monocytogenes_1639_v85 | 0.91   |
| Listeria_monocytogenes_serotype_1_2a_str_10-0814_1196187 | Listeria_monocytogenes_1639_v85 | 0.9143 |
| Listeria_monocytogenes_serotype_1_2a_str_10-0813_1196166 | Listeria_monocytogenes_1639_v85 | 0.9257 |
| Listeria_monocytogenes_serotype_1_2a_str_10-0812_1196165 | Listeria_monocytogenes_1639_v85 | 0.9257 |
| Listeria_monocytogenes_serotype_1_2a_str_08-7669_1196186 | Listeria_monocytogenes_1639_v85 | 0.9228 |
| Listeria_monocytogenes_serotype_1_2a_str_08-7374_1196185 | Listeria_monocytogenes_1639_v85 | 0.914  |
| Listeria_monocytogenes_serotype_1_2a_str_08-6997_1196184 | Listeria_monocytogenes_1639_v85 | 0.91   |



|                                                          |                                 |        |
|----------------------------------------------------------|---------------------------------|--------|
| Listeria_monocytogenes_serotype_1_2a_str_08-6569_1196183 | Listeria_monocytogenes_1639_v85 | 0.91   |
| Listeria_monocytogenes_serotype_1_2a_str_08-6056_1196182 | Listeria_monocytogenes_1639_v85 | 0.91   |
| Listeria_monocytogenes_serotype_1_2a_str_04-5457_1196181 | Listeria_monocytogenes_1639_v85 | 0.914  |
| Listeria_monocytogenes_serotype_1_2a_str_02-5993_1196180 | Listeria_monocytogenes_1639_v85 | 0.914  |
| Listeria_monocytogenes_R479a_1437838                     | Listeria_monocytogenes_1639_v85 | 0.9118 |
| Listeria_monocytogenes_N53-1_1234142                     | Listeria_monocytogenes_1639_v85 | 0.8876 |
| Listeria_monocytogenes_M7_1030009                        | Listeria_monocytogenes_1639_v85 | 0.9104 |
| Listeria_monocytogenes_LO28_393132                       | Listeria_monocytogenes_1639_v85 | 0.9269 |
| Listeria_monocytogenes_L99_563174                        | Listeria_monocytogenes_1639_v85 | 0.9107 |
| Listeria_monocytogenes_L312_882094                       | Listeria_monocytogenes_1639_v85 | 0.9606 |
| Listeria_monocytogenes_J1816_930781                      | Listeria_monocytogenes_1639_v85 | 0.947  |
| Listeria_monocytogenes_J1-220_930782                     | Listeria_monocytogenes_1639_v85 | 0.9712 |
| Listeria_monocytogenes_J0161_393130                      | Listeria_monocytogenes_1639_v85 | 0.9298 |
| Listeria_monocytogenes_HCC23_552536                      | Listeria_monocytogenes_1639_v85 | 0.91   |
| Listeria_monocytogenes_FSL_R2-561_393126                 | Listeria_monocytogenes_1639_v85 | 0.9194 |
| Listeria_monocytogenes_FSL_J1-208_393119                 | Listeria_monocytogenes_1639_v85 | 0.9097 |
| Listeria_monocytogenes_FSL_J1-175_393118                 | Listeria_monocytogenes_1639_v85 | 0.9447 |
| Listeria_monocytogenes_Finland_1998_393127               | Listeria_monocytogenes_1639_v85 | 0.9307 |
| Listeria_monocytogenes_EGD-e_169963_v1                   | Listeria_monocytogenes_1639_v85 | 0.9378 |
| Listeria_monocytogenes_EGD-e_169963                      | Listeria_monocytogenes_1639_v85 | 0.9381 |
| Listeria_monocytogenes_EGD_1334565                       | Listeria_monocytogenes_1639_v85 | 0.9222 |
| Listeria_monocytogenes_CFSAN002349_1299895               | Listeria_monocytogenes_1639_v85 | 0.9611 |
| Listeria_monocytogenes_ATCC_19117_882095_v1              | Listeria_monocytogenes_1639_v85 | 0.9702 |
| Listeria_monocytogenes_ATCC_19117_882095                 | Listeria_monocytogenes_1639_v85 | 0.9698 |
| Listeria_monocytogenes_6179_1288295                      | Listeria_monocytogenes_1639_v85 | 0.914  |
| Listeria_monocytogenes_1639_v9                           | Listeria_monocytogenes_1639_v85 | 0.927  |
| Listeria_monocytogenes_1639_v99                          | Listeria_monocytogenes_1639_v85 | 0.947  |
| Listeria_monocytogenes_1639_v98                          | Listeria_monocytogenes_1639_v85 | 0.9223 |
| Listeria_monocytogenes_1639_v97                          | Listeria_monocytogenes_1639_v85 | 0.9581 |
| Listeria_monocytogenes_1639_v96                          | Listeria_monocytogenes_1639_v85 | 0.947  |
| Listeria_monocytogenes_1639_v95                          | Listeria_monocytogenes_1639_v85 | 0.947  |
| Listeria_monocytogenes_1639_v94                          | Listeria_monocytogenes_1639_v85 | 0.9474 |
| Listeria_monocytogenes_1639_v93                          | Listeria_monocytogenes_1639_v85 | 0.9146 |
| Listeria_monocytogenes_1639_v92                          | Listeria_monocytogenes_1639_v85 | 0.9477 |
| Listeria_monocytogenes_1639_v91                          | Listeria_monocytogenes_1639_v85 | 0.9773 |
| Listeria_monocytogenes_1639_v90                          | Listeria_monocytogenes_1639_v85 | 0.9223 |
| Listeria_monocytogenes_1639_v8                           | Listeria_monocytogenes_1639_v85 | 0.9048 |
| Listeria_monocytogenes_1639_v89                          | Listeria_monocytogenes_1639_v85 | 0.9613 |
| Listeria_monocytogenes_1639_v88                          | Listeria_monocytogenes_1639_v85 | 0.9206 |
| Listeria_monocytogenes_1639_v87                          | Listeria_monocytogenes_1639_v85 | 0.9213 |
| Listeria_monocytogenes_1639_v86                          | Listeria_monocytogenes_1639_v85 | 0.9209 |
| Listeria_monocytogenes_1639_v85                          | Listeria_monocytogenes_1639_v85 | 0.0654 |
| Listeria_welshimeri_1643                                 | Listeria_monocytogenes_1639_v86 | 0.869  |
| Listeria_welshimeri_serovar_6b_str_SLCC5334_386043       | Listeria_monocytogenes_1639_v86 | 0.8687 |
| Listeria_seeligeri_serovar_1_2b_str_SLCC3954_683837      | Listeria_monocytogenes_1639_v86 | 0.8718 |
| Listeria_seeligeri_FSL_S4-171_702452                     | Listeria_monocytogenes_1639_v86 | 0.8126 |
| Listeria_seeligeri_FSL_N1-067_702453                     | Listeria_monocytogenes_1639_v86 | 0.8289 |
| Listeria_seeligeri_1640_v1                               | Listeria_monocytogenes_1639_v86 | 0.87   |
| Listeria_seeligeri_1640                                  | Listeria_monocytogenes_1639_v86 | 0.8755 |
| Listeria_monocytogenes_WSLC1042_1457188                  | Listeria_monocytogenes_1639_v86 | 0.9174 |
| Listeria_monocytogenes_WSLC1001_1457187                  | Listeria_monocytogenes_1639_v86 | 0.9746 |
| Listeria_monocytogenes_SLCC7179_879090                   | Listeria_monocytogenes_1639_v86 | 0.9563 |
| Listeria_monocytogenes_SLCC5850_882096                   | Listeria_monocytogenes_1639_v86 | 0.9752 |
| Listeria_monocytogenes_SLCC2755_932919                   | Listeria_monocytogenes_1639_v86 | 0.9214 |
| Listeria_monocytogenes_SLCC2540_879089                   | Listeria_monocytogenes_1639_v86 | 0.9368 |
| Listeria_monocytogenes_SLCC2479_882020                   | Listeria_monocytogenes_1639_v86 | 0.9506 |
| Listeria_monocytogenes_SLCC2378_879088                   | Listeria_monocytogenes_1639_v86 | 0.9185 |
| Listeria_monocytogenes_SLCC2376_882097                   | Listeria_monocytogenes_1639_v86 | 0.93   |
| Listeria_monocytogenes_SLCC2372_932920                   | Listeria_monocytogenes_1639_v86 | 0.9436 |
| Listeria_monocytogenes_serotype_4b_str_LL195_1230340     | Listeria_monocytogenes_1639_v86 | 0.924  |
| Listeria_monocytogenes_serotype_4b_str_LIS0087_1134669   | Listeria_monocytogenes_1639_v86 | 0.9633 |
| Listeria_monocytogenes_serotype_4b_str_F2365_265669      | Listeria_monocytogenes_1639_v86 | 0.924  |
| Listeria_monocytogenes_serotype_4b_str_CLIP_80459_568819 | Listeria_monocytogenes_1639_v86 | 0.9307 |
| Listeria_monocytogenes_serotype_4b_str_81-0861_1196161   | Listeria_monocytogenes_1639_v86 | 0.9223 |
| Listeria_monocytogenes_serotype_4b_str_81-0592_1196160   | Listeria_monocytogenes_1639_v86 | 0.9234 |
| Listeria_monocytogenes_serotype_4b_str_81-0558_1196159   | Listeria_monocytogenes_1639_v86 | 0.9237 |
| Listeria_monocytogenes_serotype_4b_str_10-0809_1196162   | Listeria_monocytogenes_1639_v86 | 0.9234 |
| Listeria_monocytogenes_serotype_4b_str_02-6680_1196175   | Listeria_monocytogenes_1639_v86 | 0.9294 |
| Listeria_monocytogenes_serotype_4b_str_02-6679_1196174   | Listeria_monocytogenes_1639_v86 | 0.9294 |
| Listeria_monocytogenes_serotype_4b_str_02-1792_1196173   | Listeria_monocytogenes_1639_v86 | 0.9226 |
| Listeria_monocytogenes_serotype_4b_str_02-1289_1196172   | Listeria_monocytogenes_1639_v86 | 0.9226 |
| Listeria_monocytogenes_serotype_4b_str_02-1103_1196171   | Listeria_monocytogenes_1639_v86 | 0.9226 |
| Listeria_monocytogenes_serotype_3c_str_10-5027_1196195   | Listeria_monocytogenes_1639_v86 | 0.9547 |
| Listeria_monocytogenes_serotype_1_2c_str_10-5026_1196194 | Listeria_monocytogenes_1639_v86 | 0.9547 |
| Listeria_monocytogenes_serotype_1_2c_str_10-5025_1196193 | Listeria_monocytogenes_1639_v86 | 0.9547 |
| Listeria_monocytogenes_serotype_1_2b_str_10-0811_1196164 | Listeria_monocytogenes_1639_v86 | 0.942  |
| Listeria_monocytogenes_serotype_1_2b_str_10-0810_1196163 | Listeria_monocytogenes_1639_v86 | 0.942  |
| Listeria_monocytogenes_serotype_1_2a_str_99-6370_1196179 | Listeria_monocytogenes_1639_v86 | 0.9428 |
| Listeria_monocytogenes_serotype_1_2a_str_98-2035_1196178 | Listeria_monocytogenes_1639_v86 | 0.9428 |
| Listeria_monocytogenes_serotype_1_2a_str_95-0093_1196177 | Listeria_monocytogenes_1639_v86 | 0.9484 |
| Listeria_monocytogenes_serotype_1_2a_str_88-0478_1196176 | Listeria_monocytogenes_1639_v86 | 0.948  |
| Listeria_monocytogenes_serotype_1_2a_str_10-5024_1196192 | Listeria_monocytogenes_1639_v86 | 0.9484 |
| Listeria_monocytogenes_serotype_1_2a_str_10-4758_1196168 | Listeria_monocytogenes_1639_v86 | 0.9561 |
| Listeria_monocytogenes_serotype_1_2a_str_10-4754_1196167 | Listeria_monocytogenes_1639_v86 | 0.9565 |
| Listeria_monocytogenes_serotype_1_2a_str_10-1321_1196191 | Listeria_monocytogenes_1639_v86 | 0.9484 |
| Listeria_monocytogenes_serotype_1_2a_str_10-1047_1196190 | Listeria_monocytogenes_1639_v86 | 0.9483 |
| Listeria_monocytogenes_serotype_1_2a_str_10-1046_1196189 | Listeria_monocytogenes_1639_v86 | 0.9483 |
| Listeria_monocytogenes_serotype_1_2a_str_10-0934_1196170 | Listeria_monocytogenes_1639_v86 | 0.9605 |
| Listeria_monocytogenes_serotype_1_2a_str_10-0933_1196169 | Listeria_monocytogenes_1639_v86 | 0.9605 |
| Listeria_monocytogenes_serotype_1_2a_str_10-0815_1196188 | Listeria_monocytogenes_1639_v86 | 0.9439 |
| Listeria_monocytogenes_serotype_1_2a_str_10-0814_1196187 | Listeria_monocytogenes_1639_v86 | 0.9484 |

|                                                          |                                 |        |
|----------------------------------------------------------|---------------------------------|--------|
| Listeria_monocytogenes_serotype_1_2a_str_10-0813_1196166 | Listeria_monocytogenes_1639_v86 | 0.981  |
| Listeria_monocytogenes_serotype_1_2a_str_10-0812_1196165 | Listeria_monocytogenes_1639_v86 | 0.981  |
| Listeria_monocytogenes_serotype_1_2a_str_08-7669_1196186 | Listeria_monocytogenes_1639_v86 | 0.9445 |
| Listeria_monocytogenes_serotype_1_2a_str_08-7374_1196185 | Listeria_monocytogenes_1639_v86 | 0.9484 |
| Listeria_monocytogenes_serotype_1_2a_str_08-6997_1196184 | Listeria_monocytogenes_1639_v86 | 0.9439 |
| Listeria_monocytogenes_serotype_1_2a_str_08-6569_1196183 | Listeria_monocytogenes_1639_v86 | 0.9439 |
| Listeria_monocytogenes_serotype_1_2a_str_08-6056_1196182 | Listeria_monocytogenes_1639_v86 | 0.9439 |
| Listeria_monocytogenes_serotype_1_2a_str_04-5457_1196181 | Listeria_monocytogenes_1639_v86 | 0.9484 |
| Listeria_monocytogenes_serotype_1_2a_str_02-5993_1196180 | Listeria_monocytogenes_1639_v86 | 0.9484 |
| Listeria_monocytogenes_R479a_1437838                     | Listeria_monocytogenes_1639_v86 | 0.9466 |
| Listeria_monocytogenes_N53-1_1234142                     | Listeria_monocytogenes_1639_v86 | 0.9033 |
| Listeria_monocytogenes_M7_1030009                        | Listeria_monocytogenes_1639_v86 | 0.9124 |
| Listeria_monocytogenes_LO28_393132                       | Listeria_monocytogenes_1639_v86 | 0.957  |
| Listeria_monocytogenes_L99_563174                        | Listeria_monocytogenes_1639_v86 | 0.9127 |
| Listeria_monocytogenes_L312_882094                       | Listeria_monocytogenes_1639_v86 | 0.9307 |
| Listeria_monocytogenes_J1816_930781                      | Listeria_monocytogenes_1639_v86 | 0.9189 |
| Listeria_monocytogenes_J1-220_930782                     | Listeria_monocytogenes_1639_v86 | 0.9295 |
| Listeria_monocytogenes_J0161_393130                      | Listeria_monocytogenes_1639_v86 | 0.947  |
| Listeria_monocytogenes_HCC23_552536                      | Listeria_monocytogenes_1639_v86 | 0.9124 |
| Listeria_monocytogenes_FSL_R2-561_393126                 | Listeria_monocytogenes_1639_v86 | 0.9518 |
| Listeria_monocytogenes_FSL_J1-208_393119                 | Listeria_monocytogenes_1639_v86 | 0.8963 |
| Listeria_monocytogenes_FSL_J1-175_393118                 | Listeria_monocytogenes_1639_v86 | 0.9422 |
| Listeria_monocytogenes_Finland_1998_393127               | Listeria_monocytogenes_1639_v86 | 0.9483 |
| Listeria_monocytogenes_EGD-e_169963_v1                   | Listeria_monocytogenes_1639_v86 | 0.9536 |
| Listeria_monocytogenes_EGD-e_169963                      | Listeria_monocytogenes_1639_v86 | 0.9536 |
| Listeria_monocytogenes_EGD_1334565                       | Listeria_monocytogenes_1639_v86 | 0.976  |
| Listeria_monocytogenes_CFSAN002349_1299895               | Listeria_monocytogenes_1639_v86 | 0.9294 |
| Listeria_monocytogenes_ATCC_19117_882095_v1              | Listeria_monocytogenes_1639_v86 | 0.9254 |
| Listeria_monocytogenes_ATCC_19117_882095                 | Listeria_monocytogenes_1639_v86 | 0.925  |
| Listeria_monocytogenes_6179_1288295                      | Listeria_monocytogenes_1639_v86 | 0.9499 |
| Listeria_monocytogenes_1639_v9                           | Listeria_monocytogenes_1639_v86 | 0.9271 |
| Listeria_monocytogenes_1639_v99                          | Listeria_monocytogenes_1639_v86 | 0.9189 |
| Listeria_monocytogenes_1639_v98                          | Listeria_monocytogenes_1639_v86 | 0.9484 |
| Listeria_monocytogenes_1639_v97                          | Listeria_monocytogenes_1639_v86 | 0.9261 |
| Listeria_monocytogenes_1639_v96                          | Listeria_monocytogenes_1639_v86 | 0.9186 |
| Listeria_monocytogenes_1639_v95                          | Listeria_monocytogenes_1639_v86 | 0.9186 |
| Listeria_monocytogenes_1639_v94                          | Listeria_monocytogenes_1639_v86 | 0.9193 |
| Listeria_monocytogenes_1639_v93                          | Listeria_monocytogenes_1639_v86 | 0.941  |
| Listeria_monocytogenes_1639_v92                          | Listeria_monocytogenes_1639_v86 | 0.9201 |
| Listeria_monocytogenes_1639_v91                          | Listeria_monocytogenes_1639_v86 | 0.931  |
| Listeria_monocytogenes_1639_v90                          | Listeria_monocytogenes_1639_v86 | 0.9484 |
| Listeria_monocytogenes_1639_v8                           | Listeria_monocytogenes_1639_v86 | 0.9348 |
| Listeria_monocytogenes_1639_v89                          | Listeria_monocytogenes_1639_v86 | 0.9337 |
| Listeria_monocytogenes_1639_v88                          | Listeria_monocytogenes_1639_v86 | 0.9606 |
| Listeria_monocytogenes_1639_v87                          | Listeria_monocytogenes_1639_v86 | 0.9981 |
| Listeria_monocytogenes_1639_v86                          | Listeria_monocytogenes_1639_v86 | 0.0786 |
| Listeria_welshimeri_1643                                 | Listeria_monocytogenes_1639_v87 | 0.8694 |
| Listeria_welshimeri_serovar_6b_str_SLCC5334_386043       | Listeria_monocytogenes_1639_v87 | 0.8687 |
| Listeria_seeligeri_serovar_1_2b_str_SLCC3954_683837      | Listeria_monocytogenes_1639_v87 | 0.8722 |
| Listeria_seeligeri_FSL_S4-171_702452                     | Listeria_monocytogenes_1639_v87 | 0.8133 |
| Listeria_seeligeri_FSL_N1-067_702453                     | Listeria_monocytogenes_1639_v87 | 0.8289 |
| Listeria_seeligeri_1640_v1                               | Listeria_monocytogenes_1639_v87 | 0.87   |
| Listeria_seeligeri_1640                                  | Listeria_monocytogenes_1639_v87 | 0.8758 |
| Listeria_monocytogenes_WSLC1042_1457188                  | Listeria_monocytogenes_1639_v87 | 0.9178 |
| Listeria_monocytogenes_WSLC1001_1457187                  | Listeria_monocytogenes_1639_v87 | 0.9753 |
| Listeria_monocytogenes_SLCC7179_879090                   | Listeria_monocytogenes_1639_v87 | 0.9566 |
| Listeria_monocytogenes_SLCC5850_882096                   | Listeria_monocytogenes_1639_v87 | 0.976  |
| Listeria_monocytogenes_SLCC2755_932919                   | Listeria_monocytogenes_1639_v87 | 0.9218 |
| Listeria_monocytogenes_SLCC2540_879089                   | Listeria_monocytogenes_1639_v87 | 0.9379 |
| Listeria_monocytogenes_SLCC2479_882020                   | Listeria_monocytogenes_1639_v87 | 0.951  |
| Listeria_monocytogenes_SLCC2378_879088                   | Listeria_monocytogenes_1639_v87 | 0.9192 |
| Listeria_monocytogenes_SLCC2376_882097                   | Listeria_monocytogenes_1639_v87 | 0.9304 |
| Listeria_monocytogenes_SLCC2372_932920                   | Listeria_monocytogenes_1639_v87 | 0.944  |
| Listeria_monocytogenes_serotype_4b_str_LL195_1230340     | Listeria_monocytogenes_1639_v87 | 0.9247 |
| Listeria_monocytogenes_serotype_4b_str_LIS0087_1134669   | Listeria_monocytogenes_1639_v87 | 0.9633 |
| Listeria_monocytogenes_serotype_4b_str_F2365_265669      | Listeria_monocytogenes_1639_v87 | 0.9247 |
| Listeria_monocytogenes_serotype_4b_str_CLIP_80459_568819 | Listeria_monocytogenes_1639_v87 | 0.9315 |
| Listeria_monocytogenes_serotype_4b_str_81-0861_1196161   | Listeria_monocytogenes_1639_v87 | 0.9227 |
| Listeria_monocytogenes_serotype_4b_str_81-0592_1196160   | Listeria_monocytogenes_1639_v87 | 0.9238 |
| Listeria_monocytogenes_serotype_4b_str_81-0558_1196159   | Listeria_monocytogenes_1639_v87 | 0.9245 |
| Listeria_monocytogenes_serotype_4b_str_10-0809_1196162   | Listeria_monocytogenes_1639_v87 | 0.9238 |
| Listeria_monocytogenes_serotype_4b_str_02-6680_1196175   | Listeria_monocytogenes_1639_v87 | 0.9297 |
| Listeria_monocytogenes_serotype_4b_str_02-6679_1196174   | Listeria_monocytogenes_1639_v87 | 0.9297 |
| Listeria_monocytogenes_serotype_4b_str_02-1792_1196173   | Listeria_monocytogenes_1639_v87 | 0.9234 |
| Listeria_monocytogenes_serotype_4b_str_02-1289_1196172   | Listeria_monocytogenes_1639_v87 | 0.9234 |
| Listeria_monocytogenes_serotype_4b_str_02-1103_1196171   | Listeria_monocytogenes_1639_v87 | 0.9234 |
| Listeria_monocytogenes_serotype_3c_str_10-5027_1196195   | Listeria_monocytogenes_1639_v87 | 0.9551 |
| Listeria_monocytogenes_serotype_1_2c_str_10-5026_1196194 | Listeria_monocytogenes_1639_v87 | 0.9554 |
| Listeria_monocytogenes_serotype_1_2c_str_10-5025_1196193 | Listeria_monocytogenes_1639_v87 | 0.9554 |
| Listeria_monocytogenes_serotype_1_2b_str_10-0811_1196164 | Listeria_monocytogenes_1639_v87 | 0.9427 |
| Listeria_monocytogenes_serotype_1_2b_str_10-0810_1196163 | Listeria_monocytogenes_1639_v87 | 0.9427 |
| Listeria_monocytogenes_serotype_1_2a_str_99-6370_1196179 | Listeria_monocytogenes_1639_v87 | 0.9432 |
| Listeria_monocytogenes_serotype_1_2a_str_98-2035_1196178 | Listeria_monocytogenes_1639_v87 | 0.9432 |
| Listeria_monocytogenes_serotype_1_2a_str_95-0093_1196177 | Listeria_monocytogenes_1639_v87 | 0.9487 |
| Listeria_monocytogenes_serotype_1_2a_str_88-0478_1196176 | Listeria_monocytogenes_1639_v87 | 0.9487 |
| Listeria_monocytogenes_serotype_1_2a_str_10-5024_1196192 | Listeria_monocytogenes_1639_v87 | 0.9491 |
| Listeria_monocytogenes_serotype_1_2a_str_10-4758_1196168 | Listeria_monocytogenes_1639_v87 | 0.9565 |
| Listeria_monocytogenes_serotype_1_2a_str_10-4754_1196167 | Listeria_monocytogenes_1639_v87 | 0.9565 |
| Listeria_monocytogenes_serotype_1_2a_str_10-1321_1196191 | Listeria_monocytogenes_1639_v87 | 0.9491 |
| Listeria_monocytogenes_serotype_1_2a_str_10-1047_1196190 | Listeria_monocytogenes_1639_v87 | 0.9487 |
| Listeria_monocytogenes_serotype_1_2a_str_10-1046_1196189 | Listeria_monocytogenes_1639_v87 | 0.9487 |

|                                                          |                                 |        |
|----------------------------------------------------------|---------------------------------|--------|
| Listeria_monocytogenes_serotype_1_2a_str_10-0934_1196170 | Listeria_monocytogenes_1639_v87 | 0.9605 |
| Listeria_monocytogenes_serotype_1_2a_str_10-0933_1196169 | Listeria_monocytogenes_1639_v87 | 0.9605 |
| Listeria_monocytogenes_serotype_1_2a_str_10-0815_1196188 | Listeria_monocytogenes_1639_v87 | 0.9442 |
| Listeria_monocytogenes_serotype_1_2a_str_10-0814_1196187 | Listeria_monocytogenes_1639_v87 | 0.9487 |
| Listeria_monocytogenes_serotype_1_2a_str_10-0813_1196166 | Listeria_monocytogenes_1639_v87 | 0.9814 |
| Listeria_monocytogenes_serotype_1_2a_str_10-0812_1196165 | Listeria_monocytogenes_1639_v87 | 0.9814 |
| Listeria_monocytogenes_serotype_1_2a_str_08-7669_1196186 | Listeria_monocytogenes_1639_v87 | 0.9445 |
| Listeria_monocytogenes_serotype_1_2a_str_08-7374_1196185 | Listeria_monocytogenes_1639_v87 | 0.9491 |
| Listeria_monocytogenes_serotype_1_2a_str_08-6997_1196184 | Listeria_monocytogenes_1639_v87 | 0.9442 |
| Listeria_monocytogenes_serotype_1_2a_str_08-6569_1196183 | Listeria_monocytogenes_1639_v87 | 0.9442 |
| Listeria_monocytogenes_serotype_1_2a_str_08-6056_1196182 | Listeria_monocytogenes_1639_v87 | 0.9442 |
| Listeria_monocytogenes_serotype_1_2a_str_04-5457_1196181 | Listeria_monocytogenes_1639_v87 | 0.9491 |
| Listeria_monocytogenes_serotype_1_2a_str_02-5993_1196180 | Listeria_monocytogenes_1639_v87 | 0.9487 |
| Listeria_monocytogenes_R479a_1437838                     | Listeria_monocytogenes_1639_v87 | 0.9469 |
| Listeria_monocytogenes_N53-1_1234142                     | Listeria_monocytogenes_1639_v87 | 0.9033 |
| Listeria_monocytogenes_M7_1030009                        | Listeria_monocytogenes_1639_v87 | 0.9127 |
| Listeria_monocytogenes_LO28_393132                       | Listeria_monocytogenes_1639_v87 | 0.9574 |
| Listeria_monocytogenes_L99_563174                        | Listeria_monocytogenes_1639_v87 | 0.9134 |
| Listeria_monocytogenes_L312_882094                       | Listeria_monocytogenes_1639_v87 | 0.9315 |
| Listeria_monocytogenes_J1816_930781                      | Listeria_monocytogenes_1639_v87 | 0.9196 |
| Listeria_monocytogenes_J1-220_930782                     | Listeria_monocytogenes_1639_v87 | 0.9299 |
| Listeria_monocytogenes_J0161_393130                      | Listeria_monocytogenes_1639_v87 | 0.9473 |
| Listeria_monocytogenes_HCC23_552536                      | Listeria_monocytogenes_1639_v87 | 0.9131 |
| Listeria_monocytogenes_FSL_R2-561_393126                 | Listeria_monocytogenes_1639_v87 | 0.9522 |
| Listeria_monocytogenes_FSL_J1-208_393119                 | Listeria_monocytogenes_1639_v87 | 0.8959 |
| Listeria_monocytogenes_FSL_J1-175_393118                 | Listeria_monocytogenes_1639_v87 | 0.9429 |
| Listeria_monocytogenes_Finland_1998_393127               | Listeria_monocytogenes_1639_v87 | 0.9479 |
| Listeria_monocytogenes_EGD-e_169963_v1                   | Listeria_monocytogenes_1639_v87 | 0.9536 |
| Listeria_monocytogenes_EGD-e_169963                      | Listeria_monocytogenes_1639_v87 | 0.9536 |
| Listeria_monocytogenes_EGD_1334565                       | Listeria_monocytogenes_1639_v87 | 0.9767 |
| Listeria_monocytogenes_CFSAN002349_1299895               | Listeria_monocytogenes_1639_v87 | 0.9298 |
| Listeria_monocytogenes_ATCC_19117_882095_v1              | Listeria_monocytogenes_1639_v87 | 0.9258 |
| Listeria_monocytogenes_ATCC_19117_882095                 | Listeria_monocytogenes_1639_v87 | 0.9257 |
| Listeria_monocytogenes_6179_1288295                      | Listeria_monocytogenes_1639_v87 | 0.9506 |
| Listeria_monocytogenes_1639_v9                           | Listeria_monocytogenes_1639_v87 | 0.9278 |
| Listeria_monocytogenes_1639_v99                          | Listeria_monocytogenes_1639_v87 | 0.9196 |
| Listeria_monocytogenes_1639_v98                          | Listeria_monocytogenes_1639_v87 | 0.9484 |
| Listeria_monocytogenes_1639_v97                          | Listeria_monocytogenes_1639_v87 | 0.9265 |
| Listeria_monocytogenes_1639_v96                          | Listeria_monocytogenes_1639_v87 | 0.9193 |
| Listeria_monocytogenes_1639_v95                          | Listeria_monocytogenes_1639_v87 | 0.9193 |
| Listeria_monocytogenes_1639_v94                          | Listeria_monocytogenes_1639_v87 | 0.9197 |
| Listeria_monocytogenes_1639_v93                          | Listeria_monocytogenes_1639_v87 | 0.9413 |
| Listeria_monocytogenes_1639_v92                          | Listeria_monocytogenes_1639_v87 | 0.9208 |
| Listeria_monocytogenes_1639_v91                          | Listeria_monocytogenes_1639_v87 | 0.9318 |
| Listeria_monocytogenes_1639_v90                          | Listeria_monocytogenes_1639_v87 | 0.9484 |
| Listeria_monocytogenes_1639_v8                           | Listeria_monocytogenes_1639_v87 | 0.9355 |
| Listeria_monocytogenes_1639_v89                          | Listeria_monocytogenes_1639_v87 | 0.934  |
| Listeria_monocytogenes_1639_v88                          | Listeria_monocytogenes_1639_v87 | 0.9613 |
| Listeria_monocytogenes_1639_v87                          | Listeria_monocytogenes_1639_v87 | 0.0779 |
| Listeria_welshimeri_1643                                 | Listeria_monocytogenes_1639_v88 | 0.87   |
| Listeria_welshimeri_serovar_6b_str_SLCC5334_386043       | Listeria_monocytogenes_1639_v88 | 0.8694 |
| Listeria_seeligeri_serovar_1_2b_str_SLCC3954_683837      | Listeria_monocytogenes_1639_v88 | 0.879  |
| Listeria_seeligeri_FSL_S4-171_702452                     | Listeria_monocytogenes_1639_v88 | 0.8227 |
| Listeria_seeligeri_FSL_N1-067_702453                     | Listeria_monocytogenes_1639_v88 | 0.8355 |
| Listeria_seeligeri_1640_v1                               | Listeria_monocytogenes_1639_v88 | 0.8771 |
| Listeria_seeligeri_1640                                  | Listeria_monocytogenes_1639_v88 | 0.8738 |
| Listeria_monocytogenes_WSLC1042_1457188                  | Listeria_monocytogenes_1639_v88 | 0.9228 |
| Listeria_monocytogenes_WSLC1001_1457187                  | Listeria_monocytogenes_1639_v88 | 0.967  |
| Listeria_monocytogenes_SLCC7179_879090                   | Listeria_monocytogenes_1639_v88 | 0.9542 |
| Listeria_monocytogenes_SLCC5850_882096                   | Listeria_monocytogenes_1639_v88 | 0.9657 |
| Listeria_monocytogenes_SLCC2755_932919                   | Listeria_monocytogenes_1639_v88 | 0.9234 |
| Listeria_monocytogenes_SLCC2540_879089                   | Listeria_monocytogenes_1639_v88 | 0.9426 |
| Listeria_monocytogenes_SLCC2479_882020                   | Listeria_monocytogenes_1639_v88 | 0.9635 |
| Listeria_monocytogenes_SLCC2378_879088                   | Listeria_monocytogenes_1639_v88 | 0.9242 |
| Listeria_monocytogenes_SLCC2376_882097                   | Listeria_monocytogenes_1639_v88 | 0.9328 |
| Listeria_monocytogenes_SLCC2372_932920                   | Listeria_monocytogenes_1639_v88 | 0.9564 |
| Listeria_monocytogenes_serotype_4b_str_LL195_1230340     | Listeria_monocytogenes_1639_v88 | 0.9294 |
| Listeria_monocytogenes_serotype_4b_str_LIS0087_1134669   | Listeria_monocytogenes_1639_v88 | 0.949  |
| Listeria_monocytogenes_serotype_4b_str_F2365_265669      | Listeria_monocytogenes_1639_v88 | 0.9294 |
| Listeria_monocytogenes_serotype_4b_str_CLIP_80459_568819 | Listeria_monocytogenes_1639_v88 | 0.9342 |
| Listeria_monocytogenes_serotype_4b_str_81-0861_1196161   | Listeria_monocytogenes_1639_v88 | 0.9194 |
| Listeria_monocytogenes_serotype_4b_str_81-0592_1196160   | Listeria_monocytogenes_1639_v88 | 0.9205 |
| Listeria_monocytogenes_serotype_4b_str_81-0558_1196159   | Listeria_monocytogenes_1639_v88 | 0.9212 |
| Listeria_monocytogenes_serotype_4b_str_10-0809_1196162   | Listeria_monocytogenes_1639_v88 | 0.9205 |
| Listeria_monocytogenes_serotype_4b_str_02-6680_1196175   | Listeria_monocytogenes_1639_v88 | 0.9302 |
| Listeria_monocytogenes_serotype_4b_str_02-6679_1196174   | Listeria_monocytogenes_1639_v88 | 0.9302 |
| Listeria_monocytogenes_serotype_4b_str_02-1792_1196173   | Listeria_monocytogenes_1639_v88 | 0.9223 |
| Listeria_monocytogenes_serotype_4b_str_02-1289_1196172   | Listeria_monocytogenes_1639_v88 | 0.9223 |
| Listeria_monocytogenes_serotype_4b_str_02-1103_1196171   | Listeria_monocytogenes_1639_v88 | 0.9223 |
| Listeria_monocytogenes_serotype_3c_str_10-5027_1196195   | Listeria_monocytogenes_1639_v88 | 0.9597 |
| Listeria_monocytogenes_serotype_1_2c_str_10-5026_1196194 | Listeria_monocytogenes_1639_v88 | 0.9605 |
| Listeria_monocytogenes_serotype_1_2c_str_10-5025_1196193 | Listeria_monocytogenes_1639_v88 | 0.9605 |
| Listeria_monocytogenes_serotype_1_2b_str_10-0811_1196164 | Listeria_monocytogenes_1639_v88 | 0.938  |
| Listeria_monocytogenes_serotype_1_2b_str_10-0810_1196163 | Listeria_monocytogenes_1639_v88 | 0.938  |
| Listeria_monocytogenes_serotype_1_2a_str_99-6370_1196179 | Listeria_monocytogenes_1639_v88 | 0.9511 |
| Listeria_monocytogenes_serotype_1_2a_str_98-2035_1196178 | Listeria_monocytogenes_1639_v88 | 0.9511 |
| Listeria_monocytogenes_serotype_1_2a_str_95-0093_1196177 | Listeria_monocytogenes_1639_v88 | 0.9556 |
| Listeria_monocytogenes_serotype_1_2a_str_88-0478_1196176 | Listeria_monocytogenes_1639_v88 | 0.9548 |
| Listeria_monocytogenes_serotype_1_2a_str_10-5024_1196192 | Listeria_monocytogenes_1639_v88 | 0.9563 |
| Listeria_monocytogenes_serotype_1_2a_str_10-4758_1196168 | Listeria_monocytogenes_1639_v88 | 0.9594 |
| Listeria_monocytogenes_serotype_1_2a_str_10-4754_1196167 | Listeria_monocytogenes_1639_v88 | 0.9594 |

|                                                          |                                 |        |
|----------------------------------------------------------|---------------------------------|--------|
| Listeria_monocytogenes_serotype_1_2a_str_10-1321_1196191 | Listeria_monocytogenes_1639_v88 | 0.9563 |
| Listeria_monocytogenes_serotype_1_2a_str_10-1047_1196190 | Listeria_monocytogenes_1639_v88 | 0.9563 |
| Listeria_monocytogenes_serotype_1_2a_str_10-1046_1196189 | Listeria_monocytogenes_1639_v88 | 0.9563 |
| Listeria_monocytogenes_serotype_1_2a_str_10-0934_1196170 | Listeria_monocytogenes_1639_v88 | 0.9783 |
| Listeria_monocytogenes_serotype_1_2a_str_10-0933_1196169 | Listeria_monocytogenes_1639_v88 | 0.9783 |
| Listeria_monocytogenes_serotype_1_2a_str_10-0815_1196188 | Listeria_monocytogenes_1639_v88 | 0.9517 |
| Listeria_monocytogenes_serotype_1_2a_str_10-0814_1196187 | Listeria_monocytogenes_1639_v88 | 0.956  |
| Listeria_monocytogenes_serotype_1_2a_str_10-0813_1196166 | Listeria_monocytogenes_1639_v88 | 0.9656 |
| Listeria_monocytogenes_serotype_1_2a_str_10-0812_1196165 | Listeria_monocytogenes_1639_v88 | 0.9656 |
| Listeria_monocytogenes_serotype_1_2a_str_08-7669_1196186 | Listeria_monocytogenes_1639_v88 | 0.954  |
| Listeria_monocytogenes_serotype_1_2a_str_08-7374_1196185 | Listeria_monocytogenes_1639_v88 | 0.9563 |
| Listeria_monocytogenes_serotype_1_2a_str_08-6997_1196184 | Listeria_monocytogenes_1639_v88 | 0.9517 |
| Listeria_monocytogenes_serotype_1_2a_str_08-6569_1196183 | Listeria_monocytogenes_1639_v88 | 0.9517 |
| Listeria_monocytogenes_serotype_1_2a_str_08-6056_1196182 | Listeria_monocytogenes_1639_v88 | 0.9517 |
| Listeria_monocytogenes_serotype_1_2a_str_04-5457_1196181 | Listeria_monocytogenes_1639_v88 | 0.9563 |
| Listeria_monocytogenes_serotype_1_2a_str_02-5993_1196180 | Listeria_monocytogenes_1639_v88 | 0.956  |
| Listeria_monocytogenes_R479a_1437838                     | Listeria_monocytogenes_1639_v88 | 0.9534 |
| Listeria_monocytogenes_N53-1_1234142                     | Listeria_monocytogenes_1639_v88 | 0.9041 |
| Listeria_monocytogenes_M7_1030009                        | Listeria_monocytogenes_1639_v88 | 0.9072 |
| Listeria_monocytogenes_LO28_393132                       | Listeria_monocytogenes_1639_v88 | 0.9565 |
| Listeria_monocytogenes_L99_563174                        | Listeria_monocytogenes_1639_v88 | 0.9079 |
| Listeria_monocytogenes_L312_882094                       | Listeria_monocytogenes_1639_v88 | 0.9342 |
| Listeria_monocytogenes_J1816_930781                      | Listeria_monocytogenes_1639_v88 | 0.9271 |
| Listeria_monocytogenes_J1-220_930782                     | Listeria_monocytogenes_1639_v88 | 0.9211 |
| Listeria_monocytogenes_J0161_393130                      | Listeria_monocytogenes_1639_v88 | 0.9512 |
| Listeria_monocytogenes_HCC23_552536                      | Listeria_monocytogenes_1639_v88 | 0.9076 |
| Listeria_monocytogenes_FSL_R2-561_393126                 | Listeria_monocytogenes_1639_v88 | 0.9583 |
| Listeria_monocytogenes_FSL_J1-208_393119                 | Listeria_monocytogenes_1639_v88 | 0.9005 |
| Listeria_monocytogenes_FSL_J1-175_393118                 | Listeria_monocytogenes_1639_v88 | 0.9416 |
| Listeria_monocytogenes_Finland_1998_393127               | Listeria_monocytogenes_1639_v88 | 0.9516 |
| Listeria_monocytogenes_EGD-e_169963_v1                   | Listeria_monocytogenes_1639_v88 | 0.9545 |
| Listeria_monocytogenes_EGD-e_169963                      | Listeria_monocytogenes_1639_v88 | 0.9545 |
| Listeria_monocytogenes_EGD_1334565                       | Listeria_monocytogenes_1639_v88 | 0.9664 |
| Listeria_monocytogenes_CFSAN002349_1299895               | Listeria_monocytogenes_1639_v88 | 0.9341 |
| Listeria_monocytogenes_ATCC_19117_882095_v1              | Listeria_monocytogenes_1639_v88 | 0.927  |
| Listeria_monocytogenes_ATCC_19117_882095                 | Listeria_monocytogenes_1639_v88 | 0.927  |
| Listeria_monocytogenes_6179_1288295                      | Listeria_monocytogenes_1639_v88 | 0.9472 |
| Listeria_monocytogenes_1639_v9                           | Listeria_monocytogenes_1639_v88 | 0.9272 |
| Listeria_monocytogenes_1639_v99                          | Listeria_monocytogenes_1639_v88 | 0.9275 |
| Listeria_monocytogenes_1639_v98                          | Listeria_monocytogenes_1639_v88 | 0.949  |
| Listeria_monocytogenes_1639_v97                          | Listeria_monocytogenes_1639_v88 | 0.9307 |
| Listeria_monocytogenes_1639_v96                          | Listeria_monocytogenes_1639_v88 | 0.9272 |
| Listeria_monocytogenes_1639_v95                          | Listeria_monocytogenes_1639_v88 | 0.9272 |
| Listeria_monocytogenes_1639_v94                          | Listeria_monocytogenes_1639_v88 | 0.9272 |
| Listeria_monocytogenes_1639_v93                          | Listeria_monocytogenes_1639_v88 | 0.9415 |
| Listeria_monocytogenes_1639_v92                          | Listeria_monocytogenes_1639_v88 | 0.9275 |
| Listeria_monocytogenes_1639_v91                          | Listeria_monocytogenes_1639_v88 | 0.9244 |
| Listeria_monocytogenes_1639_v90                          | Listeria_monocytogenes_1639_v88 | 0.949  |
| Listeria_monocytogenes_1639_v8                           | Listeria_monocytogenes_1639_v88 | 0.944  |
| Listeria_monocytogenes_1639_v89                          | Listeria_monocytogenes_1639_v88 | 0.9312 |
| Listeria_monocytogenes_1639_v88                          | Listeria_monocytogenes_1639_v88 | 0.0684 |
| Listeria_welshimeri_1643                                 | Listeria_monocytogenes_1639_v89 | 0.8813 |
| Listeria_welshimeri_serovar_6b_str_SLCC5334_386043       | Listeria_monocytogenes_1639_v89 | 0.881  |
| Listeria_seeligeri_serovar_1_2b_str_SLCC3954_683837      | Listeria_monocytogenes_1639_v89 | 0.8873 |
| Listeria_seeligeri_FSL_S4-171_702452                     | Listeria_monocytogenes_1639_v89 | 0.8292 |
| Listeria_seeligeri_FSL_N1-067_702453                     | Listeria_monocytogenes_1639_v89 | 0.8319 |
| Listeria_seeligeri_1640_v1                               | Listeria_monocytogenes_1639_v89 | 0.8923 |
| Listeria_seeligeri_1640                                  | Listeria_monocytogenes_1639_v89 | 0.8888 |
| Listeria_monocytogenes_WSLC1042_1457188                  | Listeria_monocytogenes_1639_v89 | 0.9594 |
| Listeria_monocytogenes_WSLC1001_1457187                  | Listeria_monocytogenes_1639_v89 | 0.9331 |
| Listeria_monocytogenes_SLCC7179_879090                   | Listeria_monocytogenes_1639_v89 | 0.9436 |
| Listeria_monocytogenes_SLCC5850_882096                   | Listeria_monocytogenes_1639_v89 | 0.937  |
| Listeria_monocytogenes_SLCC2755_932919                   | Listeria_monocytogenes_1639_v89 | 0.9435 |
| Listeria_monocytogenes_SLCC2540_879089                   | Listeria_monocytogenes_1639_v89 | 0.9448 |
| Listeria_monocytogenes_SLCC2479_882020                   | Listeria_monocytogenes_1639_v89 | 0.9309 |
| Listeria_monocytogenes_SLCC2378_879088                   | Listeria_monocytogenes_1639_v89 | 0.9601 |
| Listeria_monocytogenes_SLCC2376_882097                   | Listeria_monocytogenes_1639_v89 | 0.9381 |
| Listeria_monocytogenes_SLCC2372_932920                   | Listeria_monocytogenes_1639_v89 | 0.9236 |
| Listeria_monocytogenes_serotype_4b_str_LL195_1230340     | Listeria_monocytogenes_1639_v89 | 0.966  |
| Listeria_monocytogenes_serotype_4b_str_LIS0087_1134669   | Listeria_monocytogenes_1639_v89 | 0.9218 |
| Listeria_monocytogenes_serotype_4b_str_F2365_265669      | Listeria_monocytogenes_1639_v89 | 0.966  |
| Listeria_monocytogenes_serotype_4b_str_CLIP_80459_568819 | Listeria_monocytogenes_1639_v89 | 0.9675 |
| Listeria_monocytogenes_serotype_4b_str_81-0861_1196161   | Listeria_monocytogenes_1639_v89 | 0.9617 |
| Listeria_monocytogenes_serotype_4b_str_81-0592_1196160   | Listeria_monocytogenes_1639_v89 | 0.9628 |
| Listeria_monocytogenes_serotype_4b_str_81-0558_1196159   | Listeria_monocytogenes_1639_v89 | 0.962  |
| Listeria_monocytogenes_serotype_4b_str_10-0809_1196162   | Listeria_monocytogenes_1639_v89 | 0.9628 |
| Listeria_monocytogenes_serotype_4b_str_02-6680_1196175   | Listeria_monocytogenes_1639_v89 | 0.9725 |
| Listeria_monocytogenes_serotype_4b_str_02-6679_1196174   | Listeria_monocytogenes_1639_v89 | 0.9725 |
| Listeria_monocytogenes_serotype_4b_str_02-1792_1196173   | Listeria_monocytogenes_1639_v89 | 0.9639 |
| Listeria_monocytogenes_serotype_4b_str_02-1289_1196172   | Listeria_monocytogenes_1639_v89 | 0.9639 |
| Listeria_monocytogenes_serotype_4b_str_02-1103_1196171   | Listeria_monocytogenes_1639_v89 | 0.9639 |
| Listeria_monocytogenes_serotype_3c_str_10-5027_1196195   | Listeria_monocytogenes_1639_v89 | 0.9298 |
| Listeria_monocytogenes_serotype_1_2c_str_10-5026_1196194 | Listeria_monocytogenes_1639_v89 | 0.9298 |
| Listeria_monocytogenes_serotype_1_2c_str_10-5025_1196193 | Listeria_monocytogenes_1639_v89 | 0.9298 |
| Listeria_monocytogenes_serotype_1_2b_str_10-0811_1196164 | Listeria_monocytogenes_1639_v89 | 0.9492 |
| Listeria_monocytogenes_serotype_1_2b_str_10-0810_1196163 | Listeria_monocytogenes_1639_v89 | 0.9492 |
| Listeria_monocytogenes_serotype_1_2a_str_99-6370_1196179 | Listeria_monocytogenes_1639_v89 | 0.9233 |
| Listeria_monocytogenes_serotype_1_2a_str_98-2035_1196178 | Listeria_monocytogenes_1639_v89 | 0.9233 |
| Listeria_monocytogenes_serotype_1_2a_str_95-0093_1196177 | Listeria_monocytogenes_1639_v89 | 0.9277 |
| Listeria_monocytogenes_serotype_1_2a_str_88-0478_1196176 | Listeria_monocytogenes_1639_v89 | 0.9269 |
| Listeria_monocytogenes_serotype_1_2a_str_10-5024_1196192 | Listeria_monocytogenes_1639_v89 | 0.9277 |

|                                                          |                                 |        |
|----------------------------------------------------------|---------------------------------|--------|
| Listeria_monocytogenes_serotype_1_2a_str_10-4758_1196168 | Listeria_monocytogenes_1639_v89 | 0.9378 |
| Listeria_monocytogenes_serotype_1_2a_str_10-4754_1196167 | Listeria_monocytogenes_1639_v89 | 0.9382 |
| Listeria_monocytogenes_serotype_1_2a_str_10-1321_1196191 | Listeria_monocytogenes_1639_v89 | 0.9277 |
| Listeria_monocytogenes_serotype_1_2a_str_10-1047_1196190 | Listeria_monocytogenes_1639_v89 | 0.9284 |
| Listeria_monocytogenes_serotype_1_2a_str_10-1046_1196189 | Listeria_monocytogenes_1639_v89 | 0.9284 |
| Listeria_monocytogenes_serotype_1_2a_str_10-0934_1196170 | Listeria_monocytogenes_1639_v89 | 0.9435 |
| Listeria_monocytogenes_serotype_1_2a_str_10-0933_1196169 | Listeria_monocytogenes_1639_v89 | 0.9435 |
| Listeria_monocytogenes_serotype_1_2a_str_10-0815_1196188 | Listeria_monocytogenes_1639_v89 | 0.9239 |
| Listeria_monocytogenes_serotype_1_2a_str_10-0814_1196187 | Listeria_monocytogenes_1639_v89 | 0.928  |
| Listeria_monocytogenes_serotype_1_2a_str_10-0813_1196166 | Listeria_monocytogenes_1639_v89 | 0.939  |
| Listeria_monocytogenes_serotype_1_2a_str_10-0812_1196165 | Listeria_monocytogenes_1639_v89 | 0.939  |
| Listeria_monocytogenes_serotype_1_2a_str_08-7669_1196186 | Listeria_monocytogenes_1639_v89 | 0.9363 |
| Listeria_monocytogenes_serotype_1_2a_str_08-7374_1196185 | Listeria_monocytogenes_1639_v89 | 0.9277 |
| Listeria_monocytogenes_serotype_1_2a_str_08-6997_1196184 | Listeria_monocytogenes_1639_v89 | 0.9239 |
| Listeria_monocytogenes_serotype_1_2a_str_08-6569_1196183 | Listeria_monocytogenes_1639_v89 | 0.9239 |
| Listeria_monocytogenes_serotype_1_2a_str_08-6056_1196182 | Listeria_monocytogenes_1639_v89 | 0.9239 |
| Listeria_monocytogenes_serotype_1_2a_str_04-5457_1196181 | Listeria_monocytogenes_1639_v89 | 0.9277 |
| Listeria_monocytogenes_serotype_1_2a_str_02-5993_1196180 | Listeria_monocytogenes_1639_v89 | 0.9277 |
| Listeria_monocytogenes_R479a_1437838                     | Listeria_monocytogenes_1639_v89 | 0.9247 |
| Listeria_monocytogenes_N53-1_1234142                     | Listeria_monocytogenes_1639_v89 | 0.8953 |
| Listeria_monocytogenes_M7_1030009                        | Listeria_monocytogenes_1639_v89 | 0.9136 |
| Listeria_monocytogenes_LO28_393132                       | Listeria_monocytogenes_1639_v89 | 0.9344 |
| Listeria_monocytogenes_L99_563174                        | Listeria_monocytogenes_1639_v89 | 0.914  |
| Listeria_monocytogenes_L312_882094                       | Listeria_monocytogenes_1639_v89 | 0.9678 |
| Listeria_monocytogenes_J1816_930781                      | Listeria_monocytogenes_1639_v89 | 0.9543 |
| Listeria_monocytogenes_J1-220_930782                     | Listeria_monocytogenes_1639_v89 | 0.9627 |
| Listeria_monocytogenes_J0161_393130                      | Listeria_monocytogenes_1639_v89 | 0.9363 |
| Listeria_monocytogenes_HCC23_552536                      | Listeria_monocytogenes_1639_v89 | 0.9133 |
| Listeria_monocytogenes_FSL_R2-561_393126                 | Listeria_monocytogenes_1639_v89 | 0.9291 |
| Listeria_monocytogenes_FSL_J1-208_393119                 | Listeria_monocytogenes_1639_v89 | 0.9138 |
| Listeria_monocytogenes_FSL_J1-175_393118                 | Listeria_monocytogenes_1639_v89 | 0.9537 |
| Listeria_monocytogenes_Finland_1998_393127               | Listeria_monocytogenes_1639_v89 | 0.9473 |
| Listeria_monocytogenes_EGD-e_169963_v1                   | Listeria_monocytogenes_1639_v89 | 0.9451 |
| Listeria_monocytogenes_EGD-e_169963                      | Listeria_monocytogenes_1639_v89 | 0.9455 |
| Listeria_monocytogenes_EGD_1334565                       | Listeria_monocytogenes_1639_v89 | 0.9377 |
| Listeria_monocytogenes_CFSAN002349_1299895               | Listeria_monocytogenes_1639_v89 | 0.9706 |
| Listeria_monocytogenes_ATCC_19117_882095_v1              | Listeria_monocytogenes_1639_v89 | 0.968  |
| Listeria_monocytogenes_ATCC_19117_882095                 | Listeria_monocytogenes_1639_v89 | 0.9676 |
| Listeria_monocytogenes_6179_1288295                      | Listeria_monocytogenes_1639_v89 | 0.9217 |
| Listeria_monocytogenes_1639_v9                           | Listeria_monocytogenes_1639_v89 | 0.937  |
| Listeria_monocytogenes_1639_v99                          | Listeria_monocytogenes_1639_v89 | 0.9588 |
| Listeria_monocytogenes_1639_v98                          | Listeria_monocytogenes_1639_v89 | 0.9381 |
| Listeria_monocytogenes_1639_v97                          | Listeria_monocytogenes_1639_v89 | 0.9638 |
| Listeria_monocytogenes_1639_v96                          | Listeria_monocytogenes_1639_v89 | 0.9551 |
| Listeria_monocytogenes_1639_v95                          | Listeria_monocytogenes_1639_v89 | 0.9551 |
| Listeria_monocytogenes_1639_v94                          | Listeria_monocytogenes_1639_v89 | 0.9555 |
| Listeria_monocytogenes_1639_v93                          | Listeria_monocytogenes_1639_v89 | 0.9257 |
| Listeria_monocytogenes_1639_v92                          | Listeria_monocytogenes_1639_v89 | 0.9615 |
| Listeria_monocytogenes_1639_v91                          | Listeria_monocytogenes_1639_v89 | 0.9614 |
| Listeria_monocytogenes_1639_v90                          | Listeria_monocytogenes_1639_v89 | 0.9381 |
| Listeria_monocytogenes_1639_v8                           | Listeria_monocytogenes_1639_v89 | 0.9138 |
| Listeria_monocytogenes_1639_v89                          | Listeria_monocytogenes_1639_v89 | 0.0675 |
| Listeria_welshimeri_1643                                 | Listeria_monocytogenes_1639_v8  | 0.8549 |
| Listeria_welshimeri_serovar_6b_str_SLCC5334_386043       | Listeria_monocytogenes_1639_v8  | 0.8543 |
| Listeria_seeligeri_serovar_1_2b_str_SLCC3954_683837      | Listeria_monocytogenes_1639_v8  | 0.859  |
| Listeria_seeligeri_FSL_S4-171_702452                     | Listeria_monocytogenes_1639_v8  | 0.8033 |
| Listeria_seeligeri_FSL_N1-067_702453                     | Listeria_monocytogenes_1639_v8  | 0.8312 |
| Listeria_seeligeri_1640_v1                               | Listeria_monocytogenes_1639_v8  | 0.8618 |
| Listeria_seeligeri_1640                                  | Listeria_monocytogenes_1639_v8  | 0.8537 |
| Listeria_monocytogenes_WSLC1042_1457188                  | Listeria_monocytogenes_1639_v8  | 0.9067 |
| Listeria_monocytogenes_WSLC1001_1457187                  | Listeria_monocytogenes_1639_v8  | 0.9383 |
| Listeria_monocytogenes_SLCC7179_879090                   | Listeria_monocytogenes_1639_v8  | 0.9351 |
| Listeria_monocytogenes_SLCC5850_882096                   | Listeria_monocytogenes_1639_v8  | 0.9391 |
| Listeria_monocytogenes_SLCC2755_932919                   | Listeria_monocytogenes_1639_v8  | 0.9345 |
| Listeria_monocytogenes_SLCC2540_879089                   | Listeria_monocytogenes_1639_v8  | 0.9206 |
| Listeria_monocytogenes_SLCC2479_882020                   | Listeria_monocytogenes_1639_v8  | 0.9402 |
| Listeria_monocytogenes_SLCC2378_879088                   | Listeria_monocytogenes_1639_v8  | 0.9081 |
| Listeria_monocytogenes_SLCC2376_882097                   | Listeria_monocytogenes_1639_v8  | 0.9102 |
| Listeria_monocytogenes_SLCC2372_932920                   | Listeria_monocytogenes_1639_v8  | 0.9424 |
| Listeria_monocytogenes_serotype_4b_str_LL195_1230340     | Listeria_monocytogenes_1639_v8  | 0.9116 |
| Listeria_monocytogenes_serotype_4b_str_LIS0087_1134669   | Listeria_monocytogenes_1639_v8  | 0.9192 |
| Listeria_monocytogenes_serotype_4b_str_F2365_265669      | Listeria_monocytogenes_1639_v8  | 0.9116 |
| Listeria_monocytogenes_serotype_4b_str_CLIP_80459_568819 | Listeria_monocytogenes_1639_v8  | 0.9182 |
| Listeria_monocytogenes_serotype_4b_str_81-0861_1196161   | Listeria_monocytogenes_1639_v8  | 0.9043 |
| Listeria_monocytogenes_serotype_4b_str_81-0592_1196160   | Listeria_monocytogenes_1639_v8  | 0.9053 |
| Listeria_monocytogenes_serotype_4b_str_81-0558_1196159   | Listeria_monocytogenes_1639_v8  | 0.906  |
| Listeria_monocytogenes_serotype_4b_str_10-0809_1196162   | Listeria_monocytogenes_1639_v8  | 0.9053 |
| Listeria_monocytogenes_serotype_4b_str_02-6680_1196175   | Listeria_monocytogenes_1639_v8  | 0.915  |
| Listeria_monocytogenes_serotype_4b_str_02-6679_1196174   | Listeria_monocytogenes_1639_v8  | 0.915  |
| Listeria_monocytogenes_serotype_4b_str_02-1792_1196173   | Listeria_monocytogenes_1639_v8  | 0.9071 |
| Listeria_monocytogenes_serotype_4b_str_02-1289_1196172   | Listeria_monocytogenes_1639_v8  | 0.9071 |
| Listeria_monocytogenes_serotype_4b_str_02-1103_1196171   | Listeria_monocytogenes_1639_v8  | 0.9071 |
| Listeria_monocytogenes_serotype_3c_str_10-5027_1196195   | Listeria_monocytogenes_1639_v8  | 0.9431 |
| Listeria_monocytogenes_serotype_1_2c_str_10-5026_1196194 | Listeria_monocytogenes_1639_v8  | 0.9445 |
| Listeria_monocytogenes_serotype_1_2c_str_10-5025_1196193 | Listeria_monocytogenes_1639_v8  | 0.9445 |
| Listeria_monocytogenes_serotype_1_2b_str_10-0811_1196164 | Listeria_monocytogenes_1639_v8  | 0.9241 |
| Listeria_monocytogenes_serotype_1_2b_str_10-0810_1196163 | Listeria_monocytogenes_1639_v8  | 0.9241 |
| Listeria_monocytogenes_serotype_1_2a_str_99-6370_1196179 | Listeria_monocytogenes_1639_v8  | 0.9524 |
| Listeria_monocytogenes_serotype_1_2a_str_98-2035_1196178 | Listeria_monocytogenes_1639_v8  | 0.9524 |
| Listeria_monocytogenes_serotype_1_2a_str_95-0093_1196177 | Listeria_monocytogenes_1639_v8  | 0.9569 |
| Listeria_monocytogenes_serotype_1_2a_str_88-0478_1196176 | Listeria_monocytogenes_1639_v8  | 0.9572 |



|                                                          |                                 |        |
|----------------------------------------------------------|---------------------------------|--------|
| Listeria_monocytogenes_serotype_1_2a_str_10-5024_1196192 | Listeria_monocytogenes_1639_v8  | 0.9572 |
| Listeria_monocytogenes_serotype_1_2a_str_10-4758_1196168 | Listeria_monocytogenes_1639_v8  | 0.9377 |
| Listeria_monocytogenes_serotype_1_2a_str_10-4754_1196167 | Listeria_monocytogenes_1639_v8  | 0.9377 |
| Listeria_monocytogenes_serotype_1_2a_str_10-1321_1196191 | Listeria_monocytogenes_1639_v8  | 0.9572 |
| Listeria_monocytogenes_serotype_1_2a_str_10-1047_1196190 | Listeria_monocytogenes_1639_v8  | 0.959  |
| Listeria_monocytogenes_serotype_1_2a_str_10-1046_1196189 | Listeria_monocytogenes_1639_v8  | 0.959  |
| Listeria_monocytogenes_serotype_1_2a_str_10-0934_1196170 | Listeria_monocytogenes_1639_v8  | 0.9377 |
| Listeria_monocytogenes_serotype_1_2a_str_10-0933_1196169 | Listeria_monocytogenes_1639_v8  | 0.9377 |
| Listeria_monocytogenes_serotype_1_2a_str_10-0815_1196188 | Listeria_monocytogenes_1639_v8  | 0.9527 |
| Listeria_monocytogenes_serotype_1_2a_str_10-0814_1196187 | Listeria_monocytogenes_1639_v8  | 0.9569 |
| Listeria_monocytogenes_serotype_1_2a_str_10-0813_1196166 | Listeria_monocytogenes_1639_v8  | 0.9447 |
| Listeria_monocytogenes_serotype_1_2a_str_10-0812_1196165 | Listeria_monocytogenes_1639_v8  | 0.9447 |
| Listeria_monocytogenes_serotype_1_2a_str_08-7669_1196186 | Listeria_monocytogenes_1639_v8  | 0.9524 |
| Listeria_monocytogenes_serotype_1_2a_str_08-7374_1196185 | Listeria_monocytogenes_1639_v8  | 0.9572 |
| Listeria_monocytogenes_serotype_1_2a_str_08-6997_1196184 | Listeria_monocytogenes_1639_v8  | 0.9527 |
| Listeria_monocytogenes_serotype_1_2a_str_08-6569_1196183 | Listeria_monocytogenes_1639_v8  | 0.9527 |
| Listeria_monocytogenes_serotype_1_2a_str_08-6056_1196182 | Listeria_monocytogenes_1639_v8  | 0.9527 |
| Listeria_monocytogenes_serotype_1_2a_str_04-5457_1196181 | Listeria_monocytogenes_1639_v8  | 0.9572 |
| Listeria_monocytogenes_serotype_1_2a_str_02-5993_1196180 | Listeria_monocytogenes_1639_v8  | 0.9569 |
| Listeria_monocytogenes_R479a_1437838                     | Listeria_monocytogenes_1639_v8  | 0.9754 |
| Listeria_monocytogenes_N53-1_1234142                     | Listeria_monocytogenes_1639_v8  | 0.8818 |
| Listeria_monocytogenes_M7_1030009                        | Listeria_monocytogenes_1639_v8  | 0.8903 |
| Listeria_monocytogenes_LO28_393132                       | Listeria_monocytogenes_1639_v8  | 0.9348 |
| Listeria_monocytogenes_L99_563174                        | Listeria_monocytogenes_1639_v8  | 0.891  |
| Listeria_monocytogenes_L312_882094                       | Listeria_monocytogenes_1639_v8  | 0.9182 |
| Listeria_monocytogenes_J1816_930781                      | Listeria_monocytogenes_1639_v8  | 0.9104 |
| Listeria_monocytogenes_J1-220_930782                     | Listeria_monocytogenes_1639_v8  | 0.9097 |
| Listeria_monocytogenes_J0161_393130                      | Listeria_monocytogenes_1639_v8  | 0.9308 |
| Listeria_monocytogenes_HCC23_552536                      | Listeria_monocytogenes_1639_v8  | 0.8903 |
| Listeria_monocytogenes_FSL_R2-561_393126                 | Listeria_monocytogenes_1639_v8  | 0.9406 |
| Listeria_monocytogenes_FSL_J1-208_393119                 | Listeria_monocytogenes_1639_v8  | 0.8774 |
| Listeria_monocytogenes_FSL_J1-175_393118                 | Listeria_monocytogenes_1639_v8  | 0.9207 |
| Listeria_monocytogenes_Finland_1998_393127               | Listeria_monocytogenes_1639_v8  | 0.938  |
| Listeria_monocytogenes_EGD-e_169963_v1                   | Listeria_monocytogenes_1639_v8  | 0.9312 |
| Listeria_monocytogenes_EGD-e_169963                      | Listeria_monocytogenes_1639_v8  | 0.9312 |
| Listeria_monocytogenes_EGD_1334565                       | Listeria_monocytogenes_1639_v8  | 0.9398 |
| Listeria_monocytogenes_CFSAN002349_1299895               | Listeria_monocytogenes_1639_v8  | 0.9155 |
| Listeria_monocytogenes_ATCC_19117_882095_v1              | Listeria_monocytogenes_1639_v8  | 0.9126 |
| Listeria_monocytogenes_ATCC_19117_882095                 | Listeria_monocytogenes_1639_v8  | 0.9126 |
| Listeria_monocytogenes_6179_1288295                      | Listeria_monocytogenes_1639_v8  | 0.9464 |
| Listeria_monocytogenes_1639_v9                           | Listeria_monocytogenes_1639_v8  | 0.9061 |
| Listeria_monocytogenes_1639_v99                          | Listeria_monocytogenes_1639_v8  | 0.917  |
| Listeria_monocytogenes_1639_v98                          | Listeria_monocytogenes_1639_v8  | 0.9263 |
| Listeria_monocytogenes_1639_v97                          | Listeria_monocytogenes_1639_v8  | 0.9131 |
| Listeria_monocytogenes_1639_v96                          | Listeria_monocytogenes_1639_v8  | 0.9163 |
| Listeria_monocytogenes_1639_v95                          | Listeria_monocytogenes_1639_v8  | 0.9164 |
| Listeria_monocytogenes_1639_v94                          | Listeria_monocytogenes_1639_v8  | 0.9167 |
| Listeria_monocytogenes_1639_v93                          | Listeria_monocytogenes_1639_v8  | 0.9405 |
| Listeria_monocytogenes_1639_v92                          | Listeria_monocytogenes_1639_v8  | 0.9167 |
| Listeria_monocytogenes_1639_v91                          | Listeria_monocytogenes_1639_v8  | 0.9092 |
| Listeria_monocytogenes_1639_v90                          | Listeria_monocytogenes_1639_v8  | 0.9263 |
| Listeria_monocytogenes_1639_v8                           | Listeria_monocytogenes_1639_v8  | 0.0699 |
| Listeria_welshimeri_1643                                 | Listeria_monocytogenes_1639_v90 | 0.8613 |
| Listeria_welshimeri_serovar_6b_str_SLCC5334_386043       | Listeria_monocytogenes_1639_v90 | 0.8606 |
| Listeria_seeligeri_serovar_1_2b_str_SLCC3954_683837      | Listeria_monocytogenes_1639_v90 | 0.8743 |
| Listeria_seeligeri_FSL_S4-171_702452                     | Listeria_monocytogenes_1639_v90 | 0.8185 |
| Listeria_seeligeri_FSL_N1-067_702453                     | Listeria_monocytogenes_1639_v90 | 0.8306 |
| Listeria_seeligeri_1640_v1                               | Listeria_monocytogenes_1639_v90 | 0.8683 |
| Listeria_seeligeri_1640                                  | Listeria_monocytogenes_1639_v90 | 0.8768 |
| Listeria_monocytogenes_WSLC1042_1457188                  | Listeria_monocytogenes_1639_v90 | 0.9189 |
| Listeria_monocytogenes_WSLC1001_1457187                  | Listeria_monocytogenes_1639_v90 | 0.9435 |
| Listeria_monocytogenes_SLCC7179_879090                   | Listeria_monocytogenes_1639_v90 | 0.9554 |
| Listeria_monocytogenes_SLCC5850_882096                   | Listeria_monocytogenes_1639_v90 | 0.9459 |
| Listeria_monocytogenes_SLCC2755_932919                   | Listeria_monocytogenes_1639_v90 | 0.9213 |
| Listeria_monocytogenes_SLCC2540_879089                   | Listeria_monocytogenes_1639_v90 | 0.927  |
| Listeria_monocytogenes_SLCC2479_882020                   | Listeria_monocytogenes_1639_v90 | 0.9483 |
| Listeria_monocytogenes_SLCC2378_879088                   | Listeria_monocytogenes_1639_v90 | 0.9202 |
| Listeria_monocytogenes_SLCC2376_882097                   | Listeria_monocytogenes_1639_v90 | 0.9315 |
| Listeria_monocytogenes_SLCC2372_932920                   | Listeria_monocytogenes_1639_v90 | 0.941  |
| Listeria_monocytogenes_serotype_4b_str_LL195_1230340     | Listeria_monocytogenes_1639_v90 | 0.9258 |
| Listeria_monocytogenes_serotype_4b_str_LIS0087_1134669   | Listeria_monocytogenes_1639_v90 | 0.9336 |
| Listeria_monocytogenes_serotype_4b_str_F2365_265669      | Listeria_monocytogenes_1639_v90 | 0.9258 |
| Listeria_monocytogenes_serotype_4b_str_CLIP_80459_568819 | Listeria_monocytogenes_1639_v90 | 0.934  |
| Listeria_monocytogenes_serotype_4b_str_81-0861_1196161   | Listeria_monocytogenes_1639_v90 | 0.9222 |
| Listeria_monocytogenes_serotype_4b_str_81-0592_1196160   | Listeria_monocytogenes_1639_v90 | 0.9233 |
| Listeria_monocytogenes_serotype_4b_str_81-0558_1196159   | Listeria_monocytogenes_1639_v90 | 0.924  |
| Listeria_monocytogenes_serotype_4b_str_10-0809_1196162   | Listeria_monocytogenes_1639_v90 | 0.9233 |
| Listeria_monocytogenes_serotype_4b_str_02-6680_1196175   | Listeria_monocytogenes_1639_v90 | 0.9293 |
| Listeria_monocytogenes_serotype_4b_str_02-6679_1196174   | Listeria_monocytogenes_1639_v90 | 0.9293 |
| Listeria_monocytogenes_serotype_4b_str_02-1792_1196173   | Listeria_monocytogenes_1639_v90 | 0.9248 |
| Listeria_monocytogenes_serotype_4b_str_02-1289_1196172   | Listeria_monocytogenes_1639_v90 | 0.9248 |
| Listeria_monocytogenes_serotype_4b_str_02-1103_1196171   | Listeria_monocytogenes_1639_v90 | 0.9248 |
| Listeria_monocytogenes_serotype_3c_str_10-5027_1196195   | Listeria_monocytogenes_1639_v90 | 0.948  |
| Listeria_monocytogenes_serotype_1_2c_str_10-5026_1196194 | Listeria_monocytogenes_1639_v90 | 0.9487 |
| Listeria_monocytogenes_serotype_1_2c_str_10-5025_1196193 | Listeria_monocytogenes_1639_v90 | 0.9487 |
| Listeria_monocytogenes_serotype_1_2b_str_10-0811_1196164 | Listeria_monocytogenes_1639_v90 | 0.9408 |
| Listeria_monocytogenes_serotype_1_2b_str_10-0810_1196163 | Listeria_monocytogenes_1639_v90 | 0.9408 |
| Listeria_monocytogenes_serotype_1_2a_str_99-6370_1196179 | Listeria_monocytogenes_1639_v90 | 0.9442 |
| Listeria_monocytogenes_serotype_1_2a_str_98-2035_1196178 | Listeria_monocytogenes_1639_v90 | 0.9442 |
| Listeria_monocytogenes_serotype_1_2a_str_95-0093_1196177 | Listeria_monocytogenes_1639_v90 | 0.9406 |
| Listeria_monocytogenes_serotype_1_2a_str_88-0478_1196176 | Listeria_monocytogenes_1639_v90 | 0.9402 |



|                                                          |                                 |        |
|----------------------------------------------------------|---------------------------------|--------|
| Listeria_monocytogenes_serotype_1_2a_str_10-5024_1196192 | Listeria_monocytogenes_1639_v90 | 0.9409 |
| Listeria_monocytogenes_serotype_1_2a_str_10-4758_1196168 | Listeria_monocytogenes_1639_v90 | 0.9444 |
| Listeria_monocytogenes_serotype_1_2a_str_10-4754_1196167 | Listeria_monocytogenes_1639_v90 | 0.9444 |
| Listeria_monocytogenes_serotype_1_2a_str_10-1321_1196191 | Listeria_monocytogenes_1639_v90 | 0.9409 |
| Listeria_monocytogenes_serotype_1_2a_str_10-1047_1196190 | Listeria_monocytogenes_1639_v90 | 0.9409 |
| Listeria_monocytogenes_serotype_1_2a_str_10-1046_1196189 | Listeria_monocytogenes_1639_v90 | 0.9409 |
| Listeria_monocytogenes_serotype_1_2a_str_10-0934_1196170 | Listeria_monocytogenes_1639_v90 | 0.949  |
| Listeria_monocytogenes_serotype_1_2a_str_10-0933_1196169 | Listeria_monocytogenes_1639_v90 | 0.949  |
| Listeria_monocytogenes_serotype_1_2a_str_10-0815_1196188 | Listeria_monocytogenes_1639_v90 | 0.9453 |
| Listeria_monocytogenes_serotype_1_2a_str_10-0814_1196187 | Listeria_monocytogenes_1639_v90 | 0.9406 |
| Listeria_monocytogenes_serotype_1_2a_str_10-0813_1196166 | Listeria_monocytogenes_1639_v90 | 0.9504 |
| Listeria_monocytogenes_serotype_1_2a_str_10-0812_1196165 | Listeria_monocytogenes_1639_v90 | 0.9504 |
| Listeria_monocytogenes_serotype_1_2a_str_08-7669_1196186 | Listeria_monocytogenes_1639_v90 | 0.9478 |
| Listeria_monocytogenes_serotype_1_2a_str_08-7374_1196185 | Listeria_monocytogenes_1639_v90 | 0.9409 |
| Listeria_monocytogenes_serotype_1_2a_str_08-6997_1196184 | Listeria_monocytogenes_1639_v90 | 0.9453 |
| Listeria_monocytogenes_serotype_1_2a_str_08-6569_1196183 | Listeria_monocytogenes_1639_v90 | 0.9453 |
| Listeria_monocytogenes_serotype_1_2a_str_08-6056_1196182 | Listeria_monocytogenes_1639_v90 | 0.9453 |
| Listeria_monocytogenes_serotype_1_2a_str_04-5457_1196181 | Listeria_monocytogenes_1639_v90 | 0.9409 |
| Listeria_monocytogenes_serotype_1_2a_str_02-5993_1196180 | Listeria_monocytogenes_1639_v90 | 0.9406 |
| Listeria_monocytogenes_R479a_1437838                     | Listeria_monocytogenes_1639_v90 | 0.9362 |
| Listeria_monocytogenes_N53-1_1234142                     | Listeria_monocytogenes_1639_v90 | 0.9047 |
| Listeria_monocytogenes_M7_1030009                        | Listeria_monocytogenes_1639_v90 | 0.9086 |
| Listeria_monocytogenes_LO28_393132                       | Listeria_monocytogenes_1639_v90 | 0.9492 |
| Listeria_monocytogenes_L99_563174                        | Listeria_monocytogenes_1639_v90 | 0.9093 |
| Listeria_monocytogenes_L312_882094                       | Listeria_monocytogenes_1639_v90 | 0.934  |
| Listeria_monocytogenes_J1816_930781                      | Listeria_monocytogenes_1639_v90 | 0.9254 |
| Listeria_monocytogenes_J1-220_930782                     | Listeria_monocytogenes_1639_v90 | 0.9224 |
| Listeria_monocytogenes_J0161_393130                      | Listeria_monocytogenes_1639_v90 | 0.9603 |
| Listeria_monocytogenes_HCC23_552536                      | Listeria_monocytogenes_1639_v90 | 0.9089 |
| Listeria_monocytogenes_FSL_R2-561_393126                 | Listeria_monocytogenes_1639_v90 | 0.9462 |
| Listeria_monocytogenes_FSL_J1-208_393119                 | Listeria_monocytogenes_1639_v90 | 0.8973 |
| Listeria_monocytogenes_FSL_J1-175_393118                 | Listeria_monocytogenes_1639_v90 | 0.929  |
| Listeria_monocytogenes_Finland_1998_393127               | Listeria_monocytogenes_1639_v90 | 0.949  |
| Listeria_monocytogenes_EGD-e_169963_v1                   | Listeria_monocytogenes_1639_v90 | 0.9573 |
| Listeria_monocytogenes_EGD-e_169963                      | Listeria_monocytogenes_1639_v90 | 0.9573 |
| Listeria_monocytogenes_EGD_1334565                       | Listeria_monocytogenes_1639_v90 | 0.9466 |
| Listeria_monocytogenes_CFSAN002349_1299895               | Listeria_monocytogenes_1639_v90 | 0.929  |
| Listeria_monocytogenes_ATCC_19117_882095_v1              | Listeria_monocytogenes_1639_v90 | 0.9261 |
| Listeria_monocytogenes_ATCC_19117_882095                 | Listeria_monocytogenes_1639_v90 | 0.926  |
| Listeria_monocytogenes_6179_1288295                      | Listeria_monocytogenes_1639_v90 | 0.9429 |
| Listeria_monocytogenes_1639_v9                           | Listeria_monocytogenes_1639_v90 | 0.9266 |
| Listeria_monocytogenes_1639_v99                          | Listeria_monocytogenes_1639_v90 | 0.9281 |
| Listeria_monocytogenes_1639_v98                          | Listeria_monocytogenes_1639_v90 | 0.9993 |
| Listeria_monocytogenes_1639_v97                          | Listeria_monocytogenes_1639_v90 | 0.9339 |
| Listeria_monocytogenes_1639_v96                          | Listeria_monocytogenes_1639_v90 | 0.9263 |
| Listeria_monocytogenes_1639_v95                          | Listeria_monocytogenes_1639_v90 | 0.9263 |
| Listeria_monocytogenes_1639_v94                          | Listeria_monocytogenes_1639_v90 | 0.9266 |
| Listeria_monocytogenes_1639_v93                          | Listeria_monocytogenes_1639_v90 | 0.9254 |
| Listeria_monocytogenes_1639_v92                          | Listeria_monocytogenes_1639_v90 | 0.9277 |
| Listeria_monocytogenes_1639_v91                          | Listeria_monocytogenes_1639_v90 | 0.9239 |
| Listeria_monocytogenes_1639_v90                          | Listeria_monocytogenes_1639_v90 | 0.0728 |
| Listeria_welshimeri_1643                                 | Listeria_monocytogenes_1639_v91 | 0.8784 |
| Listeria_welshimeri_serovar_6b_str_SLCC5334_386043       | Listeria_monocytogenes_1639_v91 | 0.8777 |
| Listeria_seeligeri_serovar_1_2b_str_SLCC3954_683837      | Listeria_monocytogenes_1639_v91 | 0.8717 |
| Listeria_seeligeri_FSL_S4-171_702452                     | Listeria_monocytogenes_1639_v91 | 0.8206 |
| Listeria_seeligeri_FSL_N1-067_702453                     | Listeria_monocytogenes_1639_v91 | 0.8266 |
| Listeria_seeligeri_1640_v1                               | Listeria_monocytogenes_1639_v91 | 0.8802 |
| Listeria_seeligeri_1640                                  | Listeria_monocytogenes_1639_v91 | 0.8802 |
| Listeria_monocytogenes_WSLC1042_1457188                  | Listeria_monocytogenes_1639_v91 | 0.9711 |
| Listeria_monocytogenes_WSLC1001_1457187                  | Listeria_monocytogenes_1639_v91 | 0.9263 |
| Listeria_monocytogenes_SLCC7179_879090                   | Listeria_monocytogenes_1639_v91 | 0.9347 |
| Listeria_monocytogenes_SLCC5850_882096                   | Listeria_monocytogenes_1639_v91 | 0.9294 |
| Listeria_monocytogenes_SLCC2755_932919                   | Listeria_monocytogenes_1639_v91 | 0.9348 |
| Listeria_monocytogenes_SLCC2540_879089                   | Listeria_monocytogenes_1639_v91 | 0.9473 |
| Listeria_monocytogenes_SLCC2479_882020                   | Listeria_monocytogenes_1639_v91 | 0.9257 |
| Listeria_monocytogenes_SLCC2378_879088                   | Listeria_monocytogenes_1639_v91 | 0.9726 |
| Listeria_monocytogenes_SLCC2376_882097                   | Listeria_monocytogenes_1639_v91 | 0.9273 |
| Listeria_monocytogenes_SLCC2372_932920                   | Listeria_monocytogenes_1639_v91 | 0.9189 |
| Listeria_monocytogenes_serotype_4b_str_LL195_1230340     | Listeria_monocytogenes_1639_v91 | 0.9784 |
| Listeria_monocytogenes_serotype_4b_str_LIS0087_1134669   | Listeria_monocytogenes_1639_v91 | 0.9121 |
| Listeria_monocytogenes_serotype_4b_str_F2365_265669      | Listeria_monocytogenes_1639_v91 | 0.9784 |
| Listeria_monocytogenes_serotype_4b_str_CLIP_80459_568819 | Listeria_monocytogenes_1639_v91 | 0.9602 |
| Listeria_monocytogenes_serotype_4b_str_81-0861_1196161   | Listeria_monocytogenes_1639_v91 | 0.9781 |
| Listeria_monocytogenes_serotype_4b_str_81-0592_1196160   | Listeria_monocytogenes_1639_v91 | 0.9792 |
| Listeria_monocytogenes_serotype_4b_str_81-0558_1196159   | Listeria_monocytogenes_1639_v91 | 0.9803 |
| Listeria_monocytogenes_serotype_4b_str_10-0809_1196162   | Listeria_monocytogenes_1639_v91 | 0.9795 |
| Listeria_monocytogenes_serotype_4b_str_02-6680_1196175   | Listeria_monocytogenes_1639_v91 | 0.9599 |
| Listeria_monocytogenes_serotype_4b_str_02-6679_1196174   | Listeria_monocytogenes_1639_v91 | 0.9599 |
| Listeria_monocytogenes_serotype_4b_str_02-1792_1196173   | Listeria_monocytogenes_1639_v91 | 0.9795 |
| Listeria_monocytogenes_serotype_4b_str_02-1289_1196172   | Listeria_monocytogenes_1639_v91 | 0.9795 |
| Listeria_monocytogenes_serotype_4b_str_02-1103_1196171   | Listeria_monocytogenes_1639_v91 | 0.9795 |
| Listeria_monocytogenes_serotype_3c_str_10-5027_1196195   | Listeria_monocytogenes_1639_v91 | 0.9283 |
| Listeria_monocytogenes_serotype_1_2c_str_10-5026_1196194 | Listeria_monocytogenes_1639_v91 | 0.9287 |
| Listeria_monocytogenes_serotype_1_2c_str_10-5025_1196193 | Listeria_monocytogenes_1639_v91 | 0.9287 |
| Listeria_monocytogenes_serotype_1_2b_str_10-0811_1196164 | Listeria_monocytogenes_1639_v91 | 0.9497 |
| Listeria_monocytogenes_serotype_1_2b_str_10-0810_1196163 | Listeria_monocytogenes_1639_v91 | 0.9497 |
| Listeria_monocytogenes_serotype_1_2a_str_99-6370_1196179 | Listeria_monocytogenes_1639_v91 | 0.9164 |
| Listeria_monocytogenes_serotype_1_2a_str_98-2035_1196178 | Listeria_monocytogenes_1639_v91 | 0.9164 |
| Listeria_monocytogenes_serotype_1_2a_str_95-0093_1196177 | Listeria_monocytogenes_1639_v91 | 0.9214 |
| Listeria_monocytogenes_serotype_1_2a_str_88-0478_1196176 | Listeria_monocytogenes_1639_v91 | 0.9217 |
| Listeria_monocytogenes_serotype_1_2a_str_10-5024_1196192 | Listeria_monocytogenes_1639_v91 | 0.9212 |

|                                                          |                                 |        |
|----------------------------------------------------------|---------------------------------|--------|
| Listeria_monocytogenes_serotype_1_2a_str_10-4758_1196168 | Listeria_monocytogenes_1639_v91 | 0.9321 |
| Listeria_monocytogenes_serotype_1_2a_str_10-4754_1196167 | Listeria_monocytogenes_1639_v91 | 0.9321 |
| Listeria_monocytogenes_serotype_1_2a_str_10-1321_1196191 | Listeria_monocytogenes_1639_v91 | 0.9218 |
| Listeria_monocytogenes_serotype_1_2a_str_10-1047_1196190 | Listeria_monocytogenes_1639_v91 | 0.9214 |
| Listeria_monocytogenes_serotype_1_2a_str_10-1046_1196189 | Listeria_monocytogenes_1639_v91 | 0.9214 |
| Listeria_monocytogenes_serotype_1_2a_str_10-0934_1196170 | Listeria_monocytogenes_1639_v91 | 0.9305 |
| Listeria_monocytogenes_serotype_1_2a_str_10-0933_1196169 | Listeria_monocytogenes_1639_v91 | 0.9305 |
| Listeria_monocytogenes_serotype_1_2a_str_10-0815_1196188 | Listeria_monocytogenes_1639_v91 | 0.9174 |
| Listeria_monocytogenes_serotype_1_2a_str_10-0814_1196187 | Listeria_monocytogenes_1639_v91 | 0.9218 |
| Listeria_monocytogenes_serotype_1_2a_str_10-0813_1196166 | Listeria_monocytogenes_1639_v91 | 0.931  |
| Listeria_monocytogenes_serotype_1_2a_str_10-0812_1196165 | Listeria_monocytogenes_1639_v91 | 0.931  |
| Listeria_monocytogenes_serotype_1_2a_str_08-7669_1196186 | Listeria_monocytogenes_1639_v91 | 0.9228 |
| Listeria_monocytogenes_serotype_1_2a_str_08-7374_1196185 | Listeria_monocytogenes_1639_v91 | 0.9218 |
| Listeria_monocytogenes_serotype_1_2a_str_08-6997_1196184 | Listeria_monocytogenes_1639_v91 | 0.9174 |
| Listeria_monocytogenes_serotype_1_2a_str_08-6569_1196183 | Listeria_monocytogenes_1639_v91 | 0.9174 |
| Listeria_monocytogenes_serotype_1_2a_str_08-6056_1196182 | Listeria_monocytogenes_1639_v91 | 0.9174 |
| Listeria_monocytogenes_serotype_1_2a_str_04-5457_1196181 | Listeria_monocytogenes_1639_v91 | 0.9218 |
| Listeria_monocytogenes_serotype_1_2a_str_02-5993_1196180 | Listeria_monocytogenes_1639_v91 | 0.9214 |
| Listeria_monocytogenes_R479a_1437838                     | Listeria_monocytogenes_1639_v91 | 0.9185 |
| Listeria_monocytogenes_N53-1_1234142                     | Listeria_monocytogenes_1639_v91 | 0.887  |
| Listeria_monocytogenes_M7_1030009                        | Listeria_monocytogenes_1639_v91 | 0.9168 |
| Listeria_monocytogenes_LO28_393132                       | Listeria_monocytogenes_1639_v91 | 0.9321 |
| Listeria_monocytogenes_L99_563174                        | Listeria_monocytogenes_1639_v91 | 0.9174 |
| Listeria_monocytogenes_L312_882094                       | Listeria_monocytogenes_1639_v91 | 0.9606 |
| Listeria_monocytogenes_J1816_930781                      | Listeria_monocytogenes_1639_v91 | 0.944  |
| Listeria_monocytogenes_J1-220_930782                     | Listeria_monocytogenes_1639_v91 | 0.9705 |
| Listeria_monocytogenes_J0161_393130                      | Listeria_monocytogenes_1639_v91 | 0.9273 |
| Listeria_monocytogenes_HCC23_552536                      | Listeria_monocytogenes_1639_v91 | 0.9167 |
| Listeria_monocytogenes_FSL_R2-561_393126                 | Listeria_monocytogenes_1639_v91 | 0.9269 |
| Listeria_monocytogenes_FSL_J1-208_393119                 | Listeria_monocytogenes_1639_v91 | 0.9072 |
| Listeria_monocytogenes_FSL_J1-175_393118                 | Listeria_monocytogenes_1639_v91 | 0.9497 |
| Listeria_monocytogenes_Finland_1998_393127               | Listeria_monocytogenes_1639_v91 | 0.9301 |
| Listeria_monocytogenes_EGD-e_169963_v1                   | Listeria_monocytogenes_1639_v91 | 0.9352 |
| Listeria_monocytogenes_EGD-e_169963                      | Listeria_monocytogenes_1639_v91 | 0.9356 |
| Listeria_monocytogenes_EGD_1334565                       | Listeria_monocytogenes_1639_v91 | 0.9301 |
| Listeria_monocytogenes_CFSAN002349_1299895               | Listeria_monocytogenes_1639_v91 | 0.9581 |
| Listeria_monocytogenes_ATCC_19117_882095_v1              | Listeria_monocytogenes_1639_v91 | 0.9578 |
| Listeria_monocytogenes_ATCC_19117_882095                 | Listeria_monocytogenes_1639_v91 | 0.9578 |
| Listeria_monocytogenes_6179_1288295                      | Listeria_monocytogenes_1639_v91 | 0.9214 |
| Listeria_monocytogenes_1639_v9                           | Listeria_monocytogenes_1639_v91 | 0.9336 |
| Listeria_monocytogenes_1639_v99                          | Listeria_monocytogenes_1639_v91 | 0.9452 |
| Listeria_monocytogenes_1639_v98                          | Listeria_monocytogenes_1639_v91 | 0.9239 |
| Listeria_monocytogenes_1639_v97                          | Listeria_monocytogenes_1639_v91 | 0.9586 |
| Listeria_monocytogenes_1639_v96                          | Listeria_monocytogenes_1639_v91 | 0.9448 |
| Listeria_monocytogenes_1639_v95                          | Listeria_monocytogenes_1639_v91 | 0.9449 |
| Listeria_monocytogenes_1639_v94                          | Listeria_monocytogenes_1639_v91 | 0.9448 |
| Listeria_monocytogenes_1639_v93                          | Listeria_monocytogenes_1639_v91 | 0.9199 |
| Listeria_monocytogenes_1639_v92                          | Listeria_monocytogenes_1639_v91 | 0.9459 |
| Listeria_monocytogenes_1639_v91                          | Listeria_monocytogenes_1639_v91 | 0.0698 |
| Listeria_welshimeri_1643                                 | Listeria_monocytogenes_1639_v92 | 0.8688 |
| Listeria_welshimeri_serovar_6b_str_SLCC5334_386043       | Listeria_monocytogenes_1639_v92 | 0.8682 |
| Listeria_seeligeri_serovar_1_2b_str_SLCC3954_683837      | Listeria_monocytogenes_1639_v92 | 0.8743 |
| Listeria_seeligeri_FSL_S4-171_702452                     | Listeria_monocytogenes_1639_v92 | 0.8271 |
| Listeria_seeligeri_FSL_N1-067_702453                     | Listeria_monocytogenes_1639_v92 | 0.833  |
| Listeria_seeligeri_1640_v1                               | Listeria_monocytogenes_1639_v92 | 0.8823 |
| Listeria_seeligeri_1640                                  | Listeria_monocytogenes_1639_v92 | 0.8805 |
| Listeria_monocytogenes_WSLC1042_1457188                  | Listeria_monocytogenes_1639_v92 | 0.9487 |
| Listeria_monocytogenes_WSLC1001_1457187                  | Listeria_monocytogenes_1639_v92 | 0.9224 |
| Listeria_monocytogenes_SLCC7179_879090                   | Listeria_monocytogenes_1639_v92 | 0.9277 |
| Listeria_monocytogenes_SLCC5850_882096                   | Listeria_monocytogenes_1639_v92 | 0.9261 |
| Listeria_monocytogenes_SLCC2755_932919                   | Listeria_monocytogenes_1639_v92 | 0.9409 |
| Listeria_monocytogenes_SLCC2540_879089                   | Listeria_monocytogenes_1639_v92 | 0.9343 |
| Listeria_monocytogenes_SLCC2479_882020                   | Listeria_monocytogenes_1639_v92 | 0.9262 |
| Listeria_monocytogenes_SLCC2378_879088                   | Listeria_monocytogenes_1639_v92 | 0.9501 |
| Listeria_monocytogenes_SLCC2376_882097                   | Listeria_monocytogenes_1639_v92 | 0.9286 |
| Listeria_monocytogenes_SLCC2372_932920                   | Listeria_monocytogenes_1639_v92 | 0.9279 |
| Listeria_monocytogenes_serotype_4b_str_LL195_1230340     | Listeria_monocytogenes_1639_v92 | 0.9558 |
| Listeria_monocytogenes_serotype_4b_str_LIS0087_1134669   | Listeria_monocytogenes_1639_v92 | 0.9085 |
| Listeria_monocytogenes_serotype_4b_str_F2365_265669      | Listeria_monocytogenes_1639_v92 | 0.9558 |
| Listeria_monocytogenes_serotype_4b_str_CLIP_80459_568819 | Listeria_monocytogenes_1639_v92 | 0.9577 |
| Listeria_monocytogenes_serotype_4b_str_81-0861_1196161   | Listeria_monocytogenes_1639_v92 | 0.9481 |
| Listeria_monocytogenes_serotype_4b_str_81-0592_1196160   | Listeria_monocytogenes_1639_v92 | 0.9491 |
| Listeria_monocytogenes_serotype_4b_str_81-0558_1196159   | Listeria_monocytogenes_1639_v92 | 0.9491 |
| Listeria_monocytogenes_serotype_4b_str_10-0809_1196162   | Listeria_monocytogenes_1639_v92 | 0.9495 |
| Listeria_monocytogenes_serotype_4b_str_02-6680_1196175   | Listeria_monocytogenes_1639_v92 | 0.9547 |
| Listeria_monocytogenes_serotype_4b_str_02-6679_1196174   | Listeria_monocytogenes_1639_v92 | 0.9547 |
| Listeria_monocytogenes_serotype_4b_str_02-1792_1196173   | Listeria_monocytogenes_1639_v92 | 0.9506 |
| Listeria_monocytogenes_serotype_4b_str_02-1289_1196172   | Listeria_monocytogenes_1639_v92 | 0.9506 |
| Listeria_monocytogenes_serotype_4b_str_02-1103_1196171   | Listeria_monocytogenes_1639_v92 | 0.9506 |
| Listeria_monocytogenes_serotype_3c_str_10-5027_1196195   | Listeria_monocytogenes_1639_v92 | 0.9258 |
| Listeria_monocytogenes_serotype_1_2c_str_10-5026_1196194 | Listeria_monocytogenes_1639_v92 | 0.9262 |
| Listeria_monocytogenes_serotype_1_2c_str_10-5025_1196193 | Listeria_monocytogenes_1639_v92 | 0.9262 |
| Listeria_monocytogenes_serotype_1_2b_str_10-0811_1196164 | Listeria_monocytogenes_1639_v92 | 0.9372 |
| Listeria_monocytogenes_serotype_1_2b_str_10-0810_1196163 | Listeria_monocytogenes_1639_v92 | 0.9372 |
| Listeria_monocytogenes_serotype_1_2a_str_99-6370_1196179 | Listeria_monocytogenes_1639_v92 | 0.9173 |
| Listeria_monocytogenes_serotype_1_2a_str_98-2035_1196178 | Listeria_monocytogenes_1639_v92 | 0.9173 |
| Listeria_monocytogenes_serotype_1_2a_str_95-0093_1196177 | Listeria_monocytogenes_1639_v92 | 0.9212 |
| Listeria_monocytogenes_serotype_1_2a_str_88-0478_1196176 | Listeria_monocytogenes_1639_v92 | 0.9208 |
| Listeria_monocytogenes_serotype_1_2a_str_10-5024_1196192 | Listeria_monocytogenes_1639_v92 | 0.9215 |
| Listeria_monocytogenes_serotype_1_2a_str_10-4758_1196168 | Listeria_monocytogenes_1639_v92 | 0.9255 |
| Listeria_monocytogenes_serotype_1_2a_str_10-4754_1196167 | Listeria_monocytogenes_1639_v92 | 0.9251 |

|                                                          |                                 |        |
|----------------------------------------------------------|---------------------------------|--------|
| Listeria_monocytogenes_serotype_1_2a_str_10-1321_1196191 | Listeria_monocytogenes_1639_v92 | 0.9215 |
| Listeria_monocytogenes_serotype_1_2a_str_10-1047_1196190 | Listeria_monocytogenes_1639_v92 | 0.9219 |
| Listeria_monocytogenes_serotype_1_2a_str_10-1046_1196189 | Listeria_monocytogenes_1639_v92 | 0.9219 |
| Listeria_monocytogenes_serotype_1_2a_str_10-0934_1196170 | Listeria_monocytogenes_1639_v92 | 0.9329 |
| Listeria_monocytogenes_serotype_1_2a_str_10-0933_1196169 | Listeria_monocytogenes_1639_v92 | 0.9329 |
| Listeria_monocytogenes_serotype_1_2a_str_10-0815_1196188 | Listeria_monocytogenes_1639_v92 | 0.9179 |
| Listeria_monocytogenes_serotype_1_2a_str_10-0814_1196187 | Listeria_monocytogenes_1639_v92 | 0.9216 |
| Listeria_monocytogenes_serotype_1_2a_str_10-0813_1196166 | Listeria_monocytogenes_1639_v92 | 0.9256 |
| Listeria_monocytogenes_serotype_1_2a_str_10-0812_1196165 | Listeria_monocytogenes_1639_v92 | 0.9256 |
| Listeria_monocytogenes_serotype_1_2a_str_08-7669_1196186 | Listeria_monocytogenes_1639_v92 | 0.9293 |
| Listeria_monocytogenes_serotype_1_2a_str_08-7374_1196185 | Listeria_monocytogenes_1639_v92 | 0.9215 |
| Listeria_monocytogenes_serotype_1_2a_str_08-6997_1196184 | Listeria_monocytogenes_1639_v92 | 0.9179 |
| Listeria_monocytogenes_serotype_1_2a_str_08-6569_1196183 | Listeria_monocytogenes_1639_v92 | 0.9179 |
| Listeria_monocytogenes_serotype_1_2a_str_08-6056_1196182 | Listeria_monocytogenes_1639_v92 | 0.9179 |
| Listeria_monocytogenes_serotype_1_2a_str_04-5457_1196181 | Listeria_monocytogenes_1639_v92 | 0.9215 |
| Listeria_monocytogenes_serotype_1_2a_str_02-5993_1196180 | Listeria_monocytogenes_1639_v92 | 0.9212 |
| Listeria_monocytogenes_R479a_1437838                     | Listeria_monocytogenes_1639_v92 | 0.9246 |
| Listeria_monocytogenes_N53-1_1234142                     | Listeria_monocytogenes_1639_v92 | 0.8832 |
| Listeria_monocytogenes_M7_1030009                        | Listeria_monocytogenes_1639_v92 | 0.9033 |
| Listeria_monocytogenes_LO28_393132                       | Listeria_monocytogenes_1639_v92 | 0.9208 |
| Listeria_monocytogenes_L99_563174                        | Listeria_monocytogenes_1639_v92 | 0.904  |
| Listeria_monocytogenes_L312_882094                       | Listeria_monocytogenes_1639_v92 | 0.958  |
| Listeria_monocytogenes_J1816_930781                      | Listeria_monocytogenes_1639_v92 | 0.9748 |
| Listeria_monocytogenes_J1-220_930782                     | Listeria_monocytogenes_1639_v92 | 0.9418 |
| Listeria_monocytogenes_J0161_393130                      | Listeria_monocytogenes_1639_v92 | 0.9285 |
| Listeria_monocytogenes_HCC23_552536                      | Listeria_monocytogenes_1639_v92 | 0.9033 |
| Listeria_monocytogenes_FSL_R2-561_393126                 | Listeria_monocytogenes_1639_v92 | 0.9241 |
| Listeria_monocytogenes_FSL_J1-208_393119                 | Listeria_monocytogenes_1639_v92 | 0.9029 |
| Listeria_monocytogenes_FSL_J1-175_393118                 | Listeria_monocytogenes_1639_v92 | 0.94   |
| Listeria_monocytogenes_Finland_1998_393127               | Listeria_monocytogenes_1639_v92 | 0.9332 |
| Listeria_monocytogenes_EGD-e_169963_v1                   | Listeria_monocytogenes_1639_v92 | 0.9301 |
| Listeria_monocytogenes_EGD-e_169963                      | Listeria_monocytogenes_1639_v92 | 0.9305 |
| Listeria_monocytogenes_EGD_1334565                       | Listeria_monocytogenes_1639_v92 | 0.9269 |
| Listeria_monocytogenes_CFSAN002349_1299895               | Listeria_monocytogenes_1639_v92 | 0.9627 |
| Listeria_monocytogenes_ATCC_19117_882095_v1              | Listeria_monocytogenes_1639_v92 | 0.9511 |
| Listeria_monocytogenes_ATCC_19117_882095                 | Listeria_monocytogenes_1639_v92 | 0.9511 |
| Listeria_monocytogenes_G179_1288295                      | Listeria_monocytogenes_1639_v92 | 0.9208 |
| Listeria_monocytogenes_1639_v9                           | Listeria_monocytogenes_1639_v92 | 0.9246 |
| Listeria_monocytogenes_1639_v99                          | Listeria_monocytogenes_1639_v92 | 0.9948 |
| Listeria_monocytogenes_1639_v98                          | Listeria_monocytogenes_1639_v92 | 0.9277 |
| Listeria_monocytogenes_1639_v97                          | Listeria_monocytogenes_1639_v92 | 0.9605 |
| Listeria_monocytogenes_1639_v96                          | Listeria_monocytogenes_1639_v92 | 0.9915 |
| Listeria_monocytogenes_1639_v95                          | Listeria_monocytogenes_1639_v92 | 0.9915 |
| Listeria_monocytogenes_1639_v94                          | Listeria_monocytogenes_1639_v92 | 0.9919 |
| Listeria_monocytogenes_1639_v93                          | Listeria_monocytogenes_1639_v92 | 0.9167 |
| Listeria_monocytogenes_1639_v92                          | Listeria_monocytogenes_1639_v92 | 0.071  |
| Listeria_welshimeri_1643                                 | Listeria_monocytogenes_1639_v93 | 0.8621 |
| Listeria_welshimeri_serovar_6b_str_SLCC5334_386043       | Listeria_monocytogenes_1639_v93 | 0.8618 |
| Listeria_seeligeri_serovar_1_2b_str_SLCC3954_683837      | Listeria_monocytogenes_1639_v93 | 0.8731 |
| Listeria_seeligeri_FSL_S4-171_702452                     | Listeria_monocytogenes_1639_v93 | 0.8022 |
| Listeria_seeligeri_FSL_N1-067_702453                     | Listeria_monocytogenes_1639_v93 | 0.8267 |
| Listeria_seeligeri_1640_v1                               | Listeria_monocytogenes_1639_v93 | 0.874  |
| Listeria_seeligeri_1640                                  | Listeria_monocytogenes_1639_v93 | 0.8649 |
| Listeria_monocytogenes_WSLC1042_1457188                  | Listeria_monocytogenes_1639_v93 | 0.9223 |
| Listeria_monocytogenes_WSLC1001_1457187                  | Listeria_monocytogenes_1639_v93 | 0.949  |
| Listeria_monocytogenes_SLCC7179_879090                   | Listeria_monocytogenes_1639_v93 | 0.9414 |
| Listeria_monocytogenes_SLCC5850_882096                   | Listeria_monocytogenes_1639_v93 | 0.9507 |
| Listeria_monocytogenes_SLCC2755_932919                   | Listeria_monocytogenes_1639_v93 | 0.9296 |
| Listeria_monocytogenes_SLCC2540_879089                   | Listeria_monocytogenes_1639_v93 | 0.9356 |
| Listeria_monocytogenes_SLCC2479_882020                   | Listeria_monocytogenes_1639_v93 | 0.9438 |
| Listeria_monocytogenes_SLCC2378_879088                   | Listeria_monocytogenes_1639_v93 | 0.9233 |
| Listeria_monocytogenes_SLCC2376_882097                   | Listeria_monocytogenes_1639_v93 | 0.9242 |
| Listeria_monocytogenes_SLCC2372_932920                   | Listeria_monocytogenes_1639_v93 | 0.9461 |
| Listeria_monocytogenes_serotype_4b_str_LL195_1230340     | Listeria_monocytogenes_1639_v93 | 0.9285 |
| Listeria_monocytogenes_serotype_4b_str_LIS0087_1134669   | Listeria_monocytogenes_1639_v93 | 0.9276 |
| Listeria_monocytogenes_serotype_4b_str_F2365_265669      | Listeria_monocytogenes_1639_v93 | 0.9285 |
| Listeria_monocytogenes_serotype_4b_str_CLIP_80459_568819 | Listeria_monocytogenes_1639_v93 | 0.928  |
| Listeria_monocytogenes_serotype_4b_str_81-0861_1196161   | Listeria_monocytogenes_1639_v93 | 0.9145 |
| Listeria_monocytogenes_serotype_4b_str_81-0592_1196160   | Listeria_monocytogenes_1639_v93 | 0.9156 |
| Listeria_monocytogenes_serotype_4b_str_81-0558_1196159   | Listeria_monocytogenes_1639_v93 | 0.9152 |
| Listeria_monocytogenes_serotype_4b_str_10-0809_1196162   | Listeria_monocytogenes_1639_v93 | 0.9156 |
| Listeria_monocytogenes_serotype_4b_str_02-6680_1196175   | Listeria_monocytogenes_1639_v93 | 0.9263 |
| Listeria_monocytogenes_serotype_4b_str_02-6679_1196174   | Listeria_monocytogenes_1639_v93 | 0.9263 |
| Listeria_monocytogenes_serotype_4b_str_02-1792_1196173   | Listeria_monocytogenes_1639_v93 | 0.916  |
| Listeria_monocytogenes_serotype_4b_str_02-1289_1196172   | Listeria_monocytogenes_1639_v93 | 0.916  |
| Listeria_monocytogenes_serotype_4b_str_02-1103_1196171   | Listeria_monocytogenes_1639_v93 | 0.916  |
| Listeria_monocytogenes_serotype_3c_str_10-5027_1196195   | Listeria_monocytogenes_1639_v93 | 0.9449 |
| Listeria_monocytogenes_serotype_1_2c_str_10-5026_1196194 | Listeria_monocytogenes_1639_v93 | 0.9449 |
| Listeria_monocytogenes_serotype_1_2c_str_10-5025_1196193 | Listeria_monocytogenes_1639_v93 | 0.9449 |
| Listeria_monocytogenes_serotype_1_2b_str_10-0811_1196164 | Listeria_monocytogenes_1639_v93 | 0.9304 |
| Listeria_monocytogenes_serotype_1_2b_str_10-0810_1196163 | Listeria_monocytogenes_1639_v93 | 0.9304 |
| Listeria_monocytogenes_serotype_1_2a_str_99-6370_1196179 | Listeria_monocytogenes_1639_v93 | 0.9307 |
| Listeria_monocytogenes_serotype_1_2a_str_98-2035_1196178 | Listeria_monocytogenes_1639_v93 | 0.9307 |
| Listeria_monocytogenes_serotype_1_2a_str_95-0093_1196177 | Listeria_monocytogenes_1639_v93 | 0.9361 |
| Listeria_monocytogenes_serotype_1_2a_str_88-0478_1196176 | Listeria_monocytogenes_1639_v93 | 0.9346 |
| Listeria_monocytogenes_serotype_1_2a_str_10-5024_1196192 | Listeria_monocytogenes_1639_v93 | 0.9361 |
| Listeria_monocytogenes_serotype_1_2a_str_10-4758_1196168 | Listeria_monocytogenes_1639_v93 | 0.956  |
| Listeria_monocytogenes_serotype_1_2a_str_10-4754_1196167 | Listeria_monocytogenes_1639_v93 | 0.9563 |
| Listeria_monocytogenes_serotype_1_2a_str_10-1321_1196191 | Listeria_monocytogenes_1639_v93 | 0.9361 |
| Listeria_monocytogenes_serotype_1_2a_str_10-1047_1196190 | Listeria_monocytogenes_1639_v93 | 0.9368 |
| Listeria_monocytogenes_serotype_1_2a_str_10-1046_1196189 | Listeria_monocytogenes_1639_v93 | 0.9368 |

|                                                          |                                 |        |
|----------------------------------------------------------|---------------------------------|--------|
| Listeria_monocytogenes_serotype_1_2a_str_10-0934_1196170 | Listeria_monocytogenes_1639_v93 | 0.9493 |
| Listeria_monocytogenes_serotype_1_2a_str_10-0933_1196169 | Listeria_monocytogenes_1639_v93 | 0.9493 |
| Listeria_monocytogenes_serotype_1_2a_str_10-0815_1196188 | Listeria_monocytogenes_1639_v93 | 0.9317 |
| Listeria_monocytogenes_serotype_1_2a_str_10-0814_1196187 | Listeria_monocytogenes_1639_v93 | 0.9361 |
| Listeria_monocytogenes_serotype_1_2a_str_10-0813_1196166 | Listeria_monocytogenes_1639_v93 | 0.9462 |
| Listeria_monocytogenes_serotype_1_2a_str_10-0812_1196165 | Listeria_monocytogenes_1639_v93 | 0.9462 |
| Listeria_monocytogenes_serotype_1_2a_str_08-7669_1196186 | Listeria_monocytogenes_1639_v93 | 0.9321 |
| Listeria_monocytogenes_serotype_1_2a_str_08-7374_1196185 | Listeria_monocytogenes_1639_v93 | 0.9361 |
| Listeria_monocytogenes_serotype_1_2a_str_08-6997_1196184 | Listeria_monocytogenes_1639_v93 | 0.9317 |
| Listeria_monocytogenes_serotype_1_2a_str_08-6569_1196183 | Listeria_monocytogenes_1639_v93 | 0.9317 |
| Listeria_monocytogenes_serotype_1_2a_str_08-6056_1196182 | Listeria_monocytogenes_1639_v93 | 0.9317 |
| Listeria_monocytogenes_serotype_1_2a_str_04-5457_1196181 | Listeria_monocytogenes_1639_v93 | 0.9361 |
| Listeria_monocytogenes_serotype_1_2a_str_02-5993_1196180 | Listeria_monocytogenes_1639_v93 | 0.9361 |
| Listeria_monocytogenes_R479a_1437838                     | Listeria_monocytogenes_1639_v93 | 0.9486 |
| Listeria_monocytogenes_N53-1_1234142                     | Listeria_monocytogenes_1639_v93 | 0.8973 |
| Listeria_monocytogenes_M7_1030009                        | Listeria_monocytogenes_1639_v93 | 0.8999 |
| Listeria_monocytogenes_LO28_393132                       | Listeria_monocytogenes_1639_v93 | 0.9421 |
| Listeria_monocytogenes_L99_563174                        | Listeria_monocytogenes_1639_v93 | 0.9003 |
| Listeria_monocytogenes_L312_882094                       | Listeria_monocytogenes_1639_v93 | 0.928  |
| Listeria_monocytogenes_J1816_930781                      | Listeria_monocytogenes_1639_v93 | 0.9108 |
| Listeria_monocytogenes_J1-220_930782                     | Listeria_monocytogenes_1639_v93 | 0.9162 |
| Listeria_monocytogenes_J0161_393130                      | Listeria_monocytogenes_1639_v93 | 0.9351 |
| Listeria_monocytogenes_HCC23_552536                      | Listeria_monocytogenes_1639_v93 | 0.8996 |
| Listeria_monocytogenes_FSL_R2-561_393126                 | Listeria_monocytogenes_1639_v93 | 0.9439 |
| Listeria_monocytogenes_FSL_J1-208_393119                 | Listeria_monocytogenes_1639_v93 | 0.8912 |
| Listeria_monocytogenes_FSL_J1-175_393118                 | Listeria_monocytogenes_1639_v93 | 0.9383 |
| Listeria_monocytogenes_Finland_1998_393127               | Listeria_monocytogenes_1639_v93 | 0.9478 |
| Listeria_monocytogenes_EGD-e_169963_v1                   | Listeria_monocytogenes_1639_v93 | 0.9407 |
| Listeria_monocytogenes_EGD-e_169963                      | Listeria_monocytogenes_1639_v93 | 0.9407 |
| Listeria_monocytogenes_EGD_1334565                       | Listeria_monocytogenes_1639_v93 | 0.9514 |
| Listeria_monocytogenes_CFSAN002349_1299895               | Listeria_monocytogenes_1639_v93 | 0.9298 |
| Listeria_monocytogenes_ATCC_19117_882095_v1              | Listeria_monocytogenes_1639_v93 | 0.9246 |
| Listeria_monocytogenes_ATCC_19117_882095                 | Listeria_monocytogenes_1639_v93 | 0.9242 |
| Listeria_monocytogenes_6179_1288295                      | Listeria_monocytogenes_1639_v93 | 0.9541 |
| Listeria_monocytogenes_1639_v9                           | Listeria_monocytogenes_1639_v93 | 0.914  |
| Listeria_monocytogenes_1639_v99                          | Listeria_monocytogenes_1639_v93 | 0.9171 |
| Listeria_monocytogenes_1639_v98                          | Listeria_monocytogenes_1639_v93 | 0.9254 |
| Listeria_monocytogenes_1639_v97                          | Listeria_monocytogenes_1639_v93 | 0.9186 |
| Listeria_monocytogenes_1639_v96                          | Listeria_monocytogenes_1639_v93 | 0.916  |
| Listeria_monocytogenes_1639_v95                          | Listeria_monocytogenes_1639_v93 | 0.9161 |
| Listeria_monocytogenes_1639_v94                          | Listeria_monocytogenes_1639_v93 | 0.9164 |
| Listeria_monocytogenes_1639_v93                          | Listeria_monocytogenes_1639_v93 | 0.0749 |
| Listeria_welshimeri_1643                                 | Listeria_monocytogenes_1639_v94 | 0.8673 |
| Listeria_welshimeri_serovar_6b_str_SLCC5334_386043       | Listeria_monocytogenes_1639_v94 | 0.867  |
| Listeria_seeligeri_serovar_1_2b_str_SLCC3954_683837      | Listeria_monocytogenes_1639_v94 | 0.8743 |
| Listeria_seeligeri_FSL_S4-171_702452                     | Listeria_monocytogenes_1639_v94 | 0.8284 |
| Listeria_seeligeri_FSL_N1-067_702453                     | Listeria_monocytogenes_1639_v94 | 0.8318 |
| Listeria_seeligeri_1640_v1                               | Listeria_monocytogenes_1639_v94 | 0.8823 |
| Listeria_seeligeri_1640                                  | Listeria_monocytogenes_1639_v94 | 0.8794 |
| Listeria_monocytogenes_WSLC1042_1457188                  | Listeria_monocytogenes_1639_v94 | 0.9487 |
| Listeria_monocytogenes_WSLC1001_1457187                  | Listeria_monocytogenes_1639_v94 | 0.9205 |
| Listeria_monocytogenes_SLCC7179_879090                   | Listeria_monocytogenes_1639_v94 | 0.9277 |
| Listeria_monocytogenes_SLCC5850_882096                   | Listeria_monocytogenes_1639_v94 | 0.9247 |
| Listeria_monocytogenes_SLCC2755_932919                   | Listeria_monocytogenes_1639_v94 | 0.9405 |
| Listeria_monocytogenes_SLCC2540_879089                   | Listeria_monocytogenes_1639_v94 | 0.9336 |
| Listeria_monocytogenes_SLCC2479_882020                   | Listeria_monocytogenes_1639_v94 | 0.9248 |
| Listeria_monocytogenes_SLCC2378_879088                   | Listeria_monocytogenes_1639_v94 | 0.9497 |
| Listeria_monocytogenes_SLCC2376_882097                   | Listeria_monocytogenes_1639_v94 | 0.9286 |
| Listeria_monocytogenes_SLCC2372_932920                   | Listeria_monocytogenes_1639_v94 | 0.9264 |
| Listeria_monocytogenes_serotype_4b_str_LL195_1230340     | Listeria_monocytogenes_1639_v94 | 0.9555 |
| Listeria_monocytogenes_serotype_4b_str_LIS0087_1134669   | Listeria_monocytogenes_1639_v94 | 0.9054 |
| Listeria_monocytogenes_serotype_4b_str_F2365_265669      | Listeria_monocytogenes_1639_v94 | 0.9555 |
| Listeria_monocytogenes_serotype_4b_str_CLIP_80459_568819 | Listeria_monocytogenes_1639_v94 | 0.9573 |
| Listeria_monocytogenes_serotype_4b_str_81-0861_1196161   | Listeria_monocytogenes_1639_v94 | 0.9477 |
| Listeria_monocytogenes_serotype_4b_str_81-0592_1196160   | Listeria_monocytogenes_1639_v94 | 0.9488 |
| Listeria_monocytogenes_serotype_4b_str_81-0558_1196159   | Listeria_monocytogenes_1639_v94 | 0.9484 |
| Listeria_monocytogenes_serotype_4b_str_10-0809_1196162   | Listeria_monocytogenes_1639_v94 | 0.9491 |
| Listeria_monocytogenes_serotype_4b_str_02-6680_1196175   | Listeria_monocytogenes_1639_v94 | 0.9547 |
| Listeria_monocytogenes_serotype_4b_str_02-6679_1196174   | Listeria_monocytogenes_1639_v94 | 0.9547 |
| Listeria_monocytogenes_serotype_4b_str_02-1792_1196173   | Listeria_monocytogenes_1639_v94 | 0.9488 |
| Listeria_monocytogenes_serotype_4b_str_02-1289_1196172   | Listeria_monocytogenes_1639_v94 | 0.9488 |
| Listeria_monocytogenes_serotype_4b_str_02-1103_1196171   | Listeria_monocytogenes_1639_v94 | 0.9488 |
| Listeria_monocytogenes_serotype_3c_str_10-5027_1196195   | Listeria_monocytogenes_1639_v94 | 0.927  |
| Listeria_monocytogenes_serotype_1_2c_str_10-5026_1196194 | Listeria_monocytogenes_1639_v94 | 0.9277 |
| Listeria_monocytogenes_serotype_1_2c_str_10-5025_1196193 | Listeria_monocytogenes_1639_v94 | 0.9277 |
| Listeria_monocytogenes_serotype_1_2b_str_10-0811_1196164 | Listeria_monocytogenes_1639_v94 | 0.9372 |
| Listeria_monocytogenes_serotype_1_2b_str_10-0810_1196163 | Listeria_monocytogenes_1639_v94 | 0.9372 |
| Listeria_monocytogenes_serotype_1_2a_str_99-6370_1196179 | Listeria_monocytogenes_1639_v94 | 0.9158 |
| Listeria_monocytogenes_serotype_1_2a_str_98-2035_1196178 | Listeria_monocytogenes_1639_v94 | 0.9158 |
| Listeria_monocytogenes_serotype_1_2a_str_95-0093_1196177 | Listeria_monocytogenes_1639_v94 | 0.9201 |
| Listeria_monocytogenes_serotype_1_2a_str_88-0478_1196176 | Listeria_monocytogenes_1639_v94 | 0.9193 |
| Listeria_monocytogenes_serotype_1_2a_str_10-5024_1196192 | Listeria_monocytogenes_1639_v94 | 0.9201 |
| Listeria_monocytogenes_serotype_1_2a_str_10-4758_1196168 | Listeria_monocytogenes_1639_v94 | 0.9244 |
| Listeria_monocytogenes_serotype_1_2a_str_10-4754_1196167 | Listeria_monocytogenes_1639_v94 | 0.9244 |
| Listeria_monocytogenes_serotype_1_2a_str_10-1321_1196191 | Listeria_monocytogenes_1639_v94 | 0.9201 |
| Listeria_monocytogenes_serotype_1_2a_str_10-1047_1196190 | Listeria_monocytogenes_1639_v94 | 0.9208 |
| Listeria_monocytogenes_serotype_1_2a_str_10-1046_1196189 | Listeria_monocytogenes_1639_v94 | 0.9208 |
| Listeria_monocytogenes_serotype_1_2a_str_10-0934_1196170 | Listeria_monocytogenes_1639_v94 | 0.9325 |
| Listeria_monocytogenes_serotype_1_2a_str_10-0933_1196169 | Listeria_monocytogenes_1639_v94 | 0.9325 |
| Listeria_monocytogenes_serotype_1_2a_str_10-0815_1196188 | Listeria_monocytogenes_1639_v94 | 0.9165 |
| Listeria_monocytogenes_serotype_1_2a_str_10-0814_1196187 | Listeria_monocytogenes_1639_v94 | 0.9205 |

|                                                          |                                 |        |
|----------------------------------------------------------|---------------------------------|--------|
| Listeria_monocytogenes_serotype_1_2a_str_10-0813_1196166 | Listeria_monocytogenes_1639_v94 | 0.9241 |
| Listeria_monocytogenes_serotype_1_2a_str_10-0812_1196165 | Listeria_monocytogenes_1639_v94 | 0.9241 |
| Listeria_monocytogenes_serotype_1_2a_str_08-7669_1196186 | Listeria_monocytogenes_1639_v94 | 0.9282 |
| Listeria_monocytogenes_serotype_1_2a_str_08-7374_1196185 | Listeria_monocytogenes_1639_v94 | 0.9201 |
| Listeria_monocytogenes_serotype_1_2a_str_08-6997_1196184 | Listeria_monocytogenes_1639_v94 | 0.9165 |
| Listeria_monocytogenes_serotype_1_2a_str_08-6569_1196183 | Listeria_monocytogenes_1639_v94 | 0.9165 |
| Listeria_monocytogenes_serotype_1_2a_str_08-6056_1196182 | Listeria_monocytogenes_1639_v94 | 0.9165 |
| Listeria_monocytogenes_serotype_1_2a_str_04-5457_1196181 | Listeria_monocytogenes_1639_v94 | 0.9201 |
| Listeria_monocytogenes_serotype_1_2a_str_02-5993_1196180 | Listeria_monocytogenes_1639_v94 | 0.9201 |
| Listeria_monocytogenes_R479a_1437838                     | Listeria_monocytogenes_1639_v94 | 0.9257 |
| Listeria_monocytogenes_N53-1_1234142                     | Listeria_monocytogenes_1639_v94 | 0.8825 |
| Listeria_monocytogenes_M7_1030009                        | Listeria_monocytogenes_1639_v94 | 0.9011 |
| Listeria_monocytogenes_LO28_393132                       | Listeria_monocytogenes_1639_v94 | 0.9215 |
| Listeria_monocytogenes_L99_563174                        | Listeria_monocytogenes_1639_v94 | 0.9014 |
| Listeria_monocytogenes_L312_882094                       | Listeria_monocytogenes_1639_v94 | 0.9577 |
| Listeria_monocytogenes_J1816_930781                      | Listeria_monocytogenes_1639_v94 | 0.9815 |
| Listeria_monocytogenes_J1-220_930782                     | Listeria_monocytogenes_1639_v94 | 0.9403 |
| Listeria_monocytogenes_J0161_393130                      | Listeria_monocytogenes_1639_v94 | 0.9278 |
| Listeria_monocytogenes_HCC23_552536                      | Listeria_monocytogenes_1639_v94 | 0.9007 |
| Listeria_monocytogenes_FSL_R2-561_393126                 | Listeria_monocytogenes_1639_v94 | 0.923  |
| Listeria_monocytogenes_FSL_J1-208_393119                 | Listeria_monocytogenes_1639_v94 | 0.9029 |
| Listeria_monocytogenes_FSL_J1-175_393118                 | Listeria_monocytogenes_1639_v94 | 0.9404 |
| Listeria_monocytogenes_Finland_1998_393127               | Listeria_monocytogenes_1639_v94 | 0.9332 |
| Listeria_monocytogenes_EGD-e_169963_v1                   | Listeria_monocytogenes_1639_v94 | 0.9282 |
| Listeria_monocytogenes_EGD-e_169963                      | Listeria_monocytogenes_1639_v94 | 0.9286 |
| Listeria_monocytogenes_EGD_1334565                       | Listeria_monocytogenes_1639_v94 | 0.9254 |
| Listeria_monocytogenes_CFSAN002349_1299895               | Listeria_monocytogenes_1639_v94 | 0.9627 |
| Listeria_monocytogenes_ATCC_19117_882095_v1              | Listeria_monocytogenes_1639_v94 | 0.9511 |
| Listeria_monocytogenes_ATCC_19117_882095                 | Listeria_monocytogenes_1639_v94 | 0.9507 |
| Listeria_monocytogenes_6179_1288295                      | Listeria_monocytogenes_1639_v94 | 0.9186 |
| Listeria_monocytogenes_1639_v9                           | Listeria_monocytogenes_1639_v94 | 0.9236 |
| Listeria_monocytogenes_1639_v99                          | Listeria_monocytogenes_1639_v94 | 0.9959 |
| Listeria_monocytogenes_1639_v98                          | Listeria_monocytogenes_1639_v94 | 0.9266 |
| Listeria_monocytogenes_1639_v97                          | Listeria_monocytogenes_1639_v94 | 0.9594 |
| Listeria_monocytogenes_1639_v96                          | Listeria_monocytogenes_1639_v94 | 0.9993 |
| Listeria_monocytogenes_1639_v95                          | Listeria_monocytogenes_1639_v94 | 0.9989 |
| Listeria_monocytogenes_1639_v94                          | Listeria_monocytogenes_1639_v94 | 0.0721 |
| Listeria_welshimeri_1643                                 | Listeria_monocytogenes_1639_v95 | 0.867  |
| Listeria_welshimeri_serovar_6b_str_SLCC5334_386043       | Listeria_monocytogenes_1639_v95 | 0.8664 |
| Listeria_seeligeri_serovar_1_2b_str_SLCC3954_683837      | Listeria_monocytogenes_1639_v95 | 0.8736 |
| Listeria_seeligeri_FSL_S4-171_702452                     | Listeria_monocytogenes_1639_v95 | 0.828  |
| Listeria_seeligeri_FSL_N1-067_702453                     | Listeria_monocytogenes_1639_v95 | 0.8312 |
| Listeria_seeligeri_1640_v1                               | Listeria_monocytogenes_1639_v95 | 0.882  |
| Listeria_seeligeri_1640                                  | Listeria_monocytogenes_1639_v95 | 0.8791 |
| Listeria_monocytogenes_WSLC1042_1457188                  | Listeria_monocytogenes_1639_v95 | 0.9483 |
| Listeria_monocytogenes_WSLC1001_1457187                  | Listeria_monocytogenes_1639_v95 | 0.9202 |
| Listeria_monocytogenes_SLCC7179_879090                   | Listeria_monocytogenes_1639_v95 | 0.9274 |
| Listeria_monocytogenes_SLCC5850_882096                   | Listeria_monocytogenes_1639_v95 | 0.9243 |
| Listeria_monocytogenes_SLCC2755_932919                   | Listeria_monocytogenes_1639_v95 | 0.9402 |
| Listeria_monocytogenes_SLCC2540_879089                   | Listeria_monocytogenes_1639_v95 | 0.9336 |
| Listeria_monocytogenes_SLCC2479_882020                   | Listeria_monocytogenes_1639_v95 | 0.9244 |
| Listeria_monocytogenes_SLCC2378_879088                   | Listeria_monocytogenes_1639_v95 | 0.9498 |
| Listeria_monocytogenes_SLCC2376_882097                   | Listeria_monocytogenes_1639_v95 | 0.9279 |
| Listeria_monocytogenes_SLCC2372_932920                   | Listeria_monocytogenes_1639_v95 | 0.9261 |
| Listeria_monocytogenes_serotype_4b_str_LL195_1230340     | Listeria_monocytogenes_1639_v95 | 0.9555 |
| Listeria_monocytogenes_serotype_4b_str_LIS0087_1134669   | Listeria_monocytogenes_1639_v95 | 0.9048 |
| Listeria_monocytogenes_serotype_4b_str_F2365_265669      | Listeria_monocytogenes_1639_v95 | 0.9555 |
| Listeria_monocytogenes_serotype_4b_str_CLIP_80459_568819 | Listeria_monocytogenes_1639_v95 | 0.9569 |
| Listeria_monocytogenes_serotype_4b_str_81-0861_1196161   | Listeria_monocytogenes_1639_v95 | 0.9473 |
| Listeria_monocytogenes_serotype_4b_str_81-0592_1196160   | Listeria_monocytogenes_1639_v95 | 0.9484 |
| Listeria_monocytogenes_serotype_4b_str_81-0558_1196159   | Listeria_monocytogenes_1639_v95 | 0.9484 |
| Listeria_monocytogenes_serotype_4b_str_10-0809_1196162   | Listeria_monocytogenes_1639_v95 | 0.9488 |
| Listeria_monocytogenes_serotype_4b_str_02-6680_1196175   | Listeria_monocytogenes_1639_v95 | 0.954  |
| Listeria_monocytogenes_serotype_4b_str_02-6679_1196174   | Listeria_monocytogenes_1639_v95 | 0.954  |
| Listeria_monocytogenes_serotype_4b_str_02-1792_1196173   | Listeria_monocytogenes_1639_v95 | 0.9488 |
| Listeria_monocytogenes_serotype_4b_str_02-1289_1196172   | Listeria_monocytogenes_1639_v95 | 0.9488 |
| Listeria_monocytogenes_serotype_4b_str_02-1103_1196171   | Listeria_monocytogenes_1639_v95 | 0.9488 |
| Listeria_monocytogenes_serotype_3c_str_10-5027_1196195   | Listeria_monocytogenes_1639_v95 | 0.9266 |
| Listeria_monocytogenes_serotype_1_2c_str_10-5026_1196194 | Listeria_monocytogenes_1639_v95 | 0.9278 |
| Listeria_monocytogenes_serotype_1_2c_str_10-5025_1196193 | Listeria_monocytogenes_1639_v95 | 0.9278 |
| Listeria_monocytogenes_serotype_1_2b_str_10-0811_1196164 | Listeria_monocytogenes_1639_v95 | 0.9369 |
| Listeria_monocytogenes_serotype_1_2b_str_10-0810_1196163 | Listeria_monocytogenes_1639_v95 | 0.9369 |
| Listeria_monocytogenes_serotype_1_2a_str_99-6370_1196179 | Listeria_monocytogenes_1639_v95 | 0.9152 |
| Listeria_monocytogenes_serotype_1_2a_str_98-2035_1196178 | Listeria_monocytogenes_1639_v95 | 0.9152 |
| Listeria_monocytogenes_serotype_1_2a_str_95-0093_1196177 | Listeria_monocytogenes_1639_v95 | 0.9194 |
| Listeria_monocytogenes_serotype_1_2a_str_88-0478_1196176 | Listeria_monocytogenes_1639_v95 | 0.919  |
| Listeria_monocytogenes_serotype_1_2a_str_10-5024_1196192 | Listeria_monocytogenes_1639_v95 | 0.9198 |
| Listeria_monocytogenes_serotype_1_2a_str_10-4758_1196168 | Listeria_monocytogenes_1639_v95 | 0.9244 |
| Listeria_monocytogenes_serotype_1_2a_str_10-4754_1196167 | Listeria_monocytogenes_1639_v95 | 0.9241 |
| Listeria_monocytogenes_serotype_1_2a_str_10-1321_1196191 | Listeria_monocytogenes_1639_v95 | 0.9198 |
| Listeria_monocytogenes_serotype_1_2a_str_10-1047_1196190 | Listeria_monocytogenes_1639_v95 | 0.9201 |
| Listeria_monocytogenes_serotype_1_2a_str_10-1046_1196189 | Listeria_monocytogenes_1639_v95 | 0.9201 |
| Listeria_monocytogenes_serotype_1_2a_str_10-0934_1196170 | Listeria_monocytogenes_1639_v95 | 0.9322 |
| Listeria_monocytogenes_serotype_1_2a_str_10-0933_1196169 | Listeria_monocytogenes_1639_v95 | 0.9322 |
| Listeria_monocytogenes_serotype_1_2a_str_10-0815_1196188 | Listeria_monocytogenes_1639_v95 | 0.9158 |
| Listeria_monocytogenes_serotype_1_2a_str_10-0814_1196187 | Listeria_monocytogenes_1639_v95 | 0.9198 |
| Listeria_monocytogenes_serotype_1_2a_str_10-0813_1196166 | Listeria_monocytogenes_1639_v95 | 0.9234 |
| Listeria_monocytogenes_serotype_1_2a_str_10-0812_1196165 | Listeria_monocytogenes_1639_v95 | 0.9234 |
| Listeria_monocytogenes_serotype_1_2a_str_08-7669_1196186 | Listeria_monocytogenes_1639_v95 | 0.9275 |
| Listeria_monocytogenes_serotype_1_2a_str_08-7374_1196185 | Listeria_monocytogenes_1639_v95 | 0.9198 |
| Listeria_monocytogenes_serotype_1_2a_str_08-6997_1196184 | Listeria_monocytogenes_1639_v95 | 0.9158 |



|                                                          |                                 |        |
|----------------------------------------------------------|---------------------------------|--------|
| Listeria_monocytogenes_serotype_1_2a_str_08-6569_1196183 | Listeria_monocytogenes_1639_v95 | 0.9158 |
| Listeria_monocytogenes_serotype_1_2a_str_08-6056_1196182 | Listeria_monocytogenes_1639_v95 | 0.9158 |
| Listeria_monocytogenes_serotype_1_2a_str_04-5457_1196181 | Listeria_monocytogenes_1639_v95 | 0.9198 |
| Listeria_monocytogenes_serotype_1_2a_str_02-5993_1196180 | Listeria_monocytogenes_1639_v95 | 0.9194 |
| Listeria_monocytogenes_R479a_1437838                     | Listeria_monocytogenes_1639_v95 | 0.925  |
| Listeria_monocytogenes_N53-1_1234142                     | Listeria_monocytogenes_1639_v95 | 0.8822 |
| Listeria_monocytogenes_M7_1030009                        | Listeria_monocytogenes_1639_v95 | 0.9004 |
| Listeria_monocytogenes_LO28_393132                       | Listeria_monocytogenes_1639_v95 | 0.9212 |
| Listeria_monocytogenes_L99_563174                        | Listeria_monocytogenes_1639_v95 | 0.9011 |
| Listeria_monocytogenes_L312_882094                       | Listeria_monocytogenes_1639_v95 | 0.9573 |
| Listeria_monocytogenes_J1816_930781                      | Listeria_monocytogenes_1639_v95 | 0.9819 |
| Listeria_monocytogenes_J1-220_930782                     | Listeria_monocytogenes_1639_v95 | 0.94   |
| Listeria_monocytogenes_J0161_393130                      | Listeria_monocytogenes_1639_v95 | 0.9275 |
| Listeria_monocytogenes_HCC23_552536                      | Listeria_monocytogenes_1639_v95 | 0.9004 |
| Listeria_monocytogenes_FSL_R2-561_393126                 | Listeria_monocytogenes_1639_v95 | 0.9227 |
| Listeria_monocytogenes_FSL_J1-208_393119                 | Listeria_monocytogenes_1639_v95 | 0.9022 |
| Listeria_monocytogenes_FSL_J1-175_393118                 | Listeria_monocytogenes_1639_v95 | 0.9401 |
| Listeria_monocytogenes_Finland_1998_393127               | Listeria_monocytogenes_1639_v95 | 0.9325 |
| Listeria_monocytogenes_EGD-e_169963_v1                   | Listeria_monocytogenes_1639_v95 | 0.9279 |
| Listeria_monocytogenes_EGD-e_169963                      | Listeria_monocytogenes_1639_v95 | 0.9283 |
| Listeria_monocytogenes_EGD_1334565                       | Listeria_monocytogenes_1639_v95 | 0.925  |
| Listeria_monocytogenes_CFSAN002349_1299895               | Listeria_monocytogenes_1639_v95 | 0.9623 |
| Listeria_monocytogenes_ATCC_19117_882095_v1              | Listeria_monocytogenes_1639_v95 | 0.9508 |
| Listeria_monocytogenes_ATCC_19117_882095                 | Listeria_monocytogenes_1639_v95 | 0.9507 |
| Listeria_monocytogenes_6179_1288295                      | Listeria_monocytogenes_1639_v95 | 0.9186 |
| Listeria_monocytogenes_1639_v9                           | Listeria_monocytogenes_1639_v95 | 0.9232 |
| Listeria_monocytogenes_1639_v99                          | Listeria_monocytogenes_1639_v95 | 0.9956 |
| Listeria_monocytogenes_1639_v98                          | Listeria_monocytogenes_1639_v95 | 0.9263 |
| Listeria_monocytogenes_1639_v97                          | Listeria_monocytogenes_1639_v95 | 0.959  |
| Listeria_monocytogenes_1639_v96                          | Listeria_monocytogenes_1639_v95 | 0.9993 |
| Listeria_monocytogenes_1639_v95                          | Listeria_monocytogenes_1639_v95 | 0.072  |
| Listeria_welshimeri_1643                                 | Listeria_monocytogenes_1639_v96 | 0.867  |
| Listeria_welshimeri_serovar_6b_str_SLCC5334_386043       | Listeria_monocytogenes_1639_v96 | 0.8663 |
| Listeria_seeligeri_serovar_1_2b_str_SLCC3954_683837      | Listeria_monocytogenes_1639_v96 | 0.8736 |
| Listeria_seeligeri_FSL_S4-171_702452                     | Listeria_monocytogenes_1639_v96 | 0.828  |
| Listeria_seeligeri_FSL_N1-067_702453                     | Listeria_monocytogenes_1639_v96 | 0.8311 |
| Listeria_seeligeri_1640_v1                               | Listeria_monocytogenes_1639_v96 | 0.882  |
| Listeria_seeligeri_1640                                  | Listeria_monocytogenes_1639_v96 | 0.879  |
| Listeria_monocytogenes_WSLC1042_1457188                  | Listeria_monocytogenes_1639_v96 | 0.9483 |
| Listeria_monocytogenes_WSLC1001_1457187                  | Listeria_monocytogenes_1639_v96 | 0.9201 |
| Listeria_monocytogenes_SLCC7179_879090                   | Listeria_monocytogenes_1639_v96 | 0.9273 |
| Listeria_monocytogenes_SLCC5850_882096                   | Listeria_monocytogenes_1639_v96 | 0.9243 |
| Listeria_monocytogenes_SLCC2755_932919                   | Listeria_monocytogenes_1639_v96 | 0.9401 |
| Listeria_monocytogenes_SLCC2540_879089                   | Listeria_monocytogenes_1639_v96 | 0.9336 |
| Listeria_monocytogenes_SLCC2479_882020                   | Listeria_monocytogenes_1639_v96 | 0.9244 |
| Listeria_monocytogenes_SLCC2378_879088                   | Listeria_monocytogenes_1639_v96 | 0.9497 |
| Listeria_monocytogenes_SLCC2376_882097                   | Listeria_monocytogenes_1639_v96 | 0.9279 |
| Listeria_monocytogenes_SLCC2372_932920                   | Listeria_monocytogenes_1639_v96 | 0.9261 |
| Listeria_monocytogenes_serotype_4b_str_LL195_1230340     | Listeria_monocytogenes_1639_v96 | 0.9555 |
| Listeria_monocytogenes_serotype_4b_str_LIS0087_1134669   | Listeria_monocytogenes_1639_v96 | 0.9047 |
| Listeria_monocytogenes_serotype_4b_str_F2365_265669      | Listeria_monocytogenes_1639_v96 | 0.9555 |
| Listeria_monocytogenes_serotype_4b_str_CLIP_80459_568819 | Listeria_monocytogenes_1639_v96 | 0.9569 |
| Listeria_monocytogenes_serotype_4b_str_81-0861_1196161   | Listeria_monocytogenes_1639_v96 | 0.9473 |
| Listeria_monocytogenes_serotype_4b_str_81-0592_1196160   | Listeria_monocytogenes_1639_v96 | 0.9484 |
| Listeria_monocytogenes_serotype_4b_str_81-0558_1196159   | Listeria_monocytogenes_1639_v96 | 0.9484 |
| Listeria_monocytogenes_serotype_4b_str_10-0809_1196162   | Listeria_monocytogenes_1639_v96 | 0.9488 |
| Listeria_monocytogenes_serotype_4b_str_02-6680_1196175   | Listeria_monocytogenes_1639_v96 | 0.954  |
| Listeria_monocytogenes_serotype_4b_str_02-6679_1196174   | Listeria_monocytogenes_1639_v96 | 0.954  |
| Listeria_monocytogenes_serotype_4b_str_02-1792_1196173   | Listeria_monocytogenes_1639_v96 | 0.9488 |
| Listeria_monocytogenes_serotype_4b_str_02-1289_1196172   | Listeria_monocytogenes_1639_v96 | 0.9488 |
| Listeria_monocytogenes_serotype_4b_str_02-1103_1196171   | Listeria_monocytogenes_1639_v96 | 0.9488 |
| Listeria_monocytogenes_serotype_3c_str_10-5027_1196195   | Listeria_monocytogenes_1639_v96 | 0.9266 |
| Listeria_monocytogenes_serotype_1_2c_str_10-5026_1196194 | Listeria_monocytogenes_1639_v96 | 0.9277 |
| Listeria_monocytogenes_serotype_1_2c_str_10-5025_1196193 | Listeria_monocytogenes_1639_v96 | 0.9277 |
| Listeria_monocytogenes_serotype_1_2b_str_10-0811_1196164 | Listeria_monocytogenes_1639_v96 | 0.9369 |
| Listeria_monocytogenes_serotype_1_2b_str_10-0810_1196163 | Listeria_monocytogenes_1639_v96 | 0.9369 |
| Listeria_monocytogenes_serotype_1_2a_str_99-6370_1196179 | Listeria_monocytogenes_1639_v96 | 0.9151 |
| Listeria_monocytogenes_serotype_1_2a_str_98-2035_1196178 | Listeria_monocytogenes_1639_v96 | 0.9151 |
| Listeria_monocytogenes_serotype_1_2a_str_95-0093_1196177 | Listeria_monocytogenes_1639_v96 | 0.9194 |
| Listeria_monocytogenes_serotype_1_2a_str_88-0478_1196176 | Listeria_monocytogenes_1639_v96 | 0.919  |
| Listeria_monocytogenes_serotype_1_2a_str_10-5024_1196192 | Listeria_monocytogenes_1639_v96 | 0.9197 |
| Listeria_monocytogenes_serotype_1_2a_str_10-4758_1196168 | Listeria_monocytogenes_1639_v96 | 0.9244 |
| Listeria_monocytogenes_serotype_1_2a_str_10-4754_1196167 | Listeria_monocytogenes_1639_v96 | 0.924  |
| Listeria_monocytogenes_serotype_1_2a_str_10-1321_1196191 | Listeria_monocytogenes_1639_v96 | 0.9197 |
| Listeria_monocytogenes_serotype_1_2a_str_10-1047_1196190 | Listeria_monocytogenes_1639_v96 | 0.9201 |
| Listeria_monocytogenes_serotype_1_2a_str_10-1046_1196189 | Listeria_monocytogenes_1639_v96 | 0.9201 |
| Listeria_monocytogenes_serotype_1_2a_str_10-0934_1196170 | Listeria_monocytogenes_1639_v96 | 0.9321 |
| Listeria_monocytogenes_serotype_1_2a_str_10-0933_1196169 | Listeria_monocytogenes_1639_v96 | 0.9321 |
| Listeria_monocytogenes_serotype_1_2a_str_10-0815_1196188 | Listeria_monocytogenes_1639_v96 | 0.9158 |
| Listeria_monocytogenes_serotype_1_2a_str_10-0814_1196187 | Listeria_monocytogenes_1639_v96 | 0.9198 |
| Listeria_monocytogenes_serotype_1_2a_str_10-0813_1196166 | Listeria_monocytogenes_1639_v96 | 0.9234 |
| Listeria_monocytogenes_serotype_1_2a_str_10-0812_1196165 | Listeria_monocytogenes_1639_v96 | 0.9234 |
| Listeria_monocytogenes_serotype_1_2a_str_08-7669_1196186 | Listeria_monocytogenes_1639_v96 | 0.9275 |
| Listeria_monocytogenes_serotype_1_2a_str_08-7374_1196185 | Listeria_monocytogenes_1639_v96 | 0.9197 |
| Listeria_monocytogenes_serotype_1_2a_str_08-6997_1196184 | Listeria_monocytogenes_1639_v96 | 0.9158 |
| Listeria_monocytogenes_serotype_1_2a_str_08-6569_1196183 | Listeria_monocytogenes_1639_v96 | 0.9158 |
| Listeria_monocytogenes_serotype_1_2a_str_08-6056_1196182 | Listeria_monocytogenes_1639_v96 | 0.9158 |
| Listeria_monocytogenes_serotype_1_2a_str_04-5457_1196181 | Listeria_monocytogenes_1639_v96 | 0.9197 |
| Listeria_monocytogenes_serotype_1_2a_str_02-5993_1196180 | Listeria_monocytogenes_1639_v96 | 0.9194 |
| Listeria_monocytogenes_R479a_1437838                     | Listeria_monocytogenes_1639_v96 | 0.925  |
| Listeria_monocytogenes_N53-1_1234142                     | Listeria_monocytogenes_1639_v96 | 0.8822 |



|                                                          |                                 |        |
|----------------------------------------------------------|---------------------------------|--------|
| Listeria_monocytogenes_M7_1030009                        | Listeria_monocytogenes_1639_v96 | 0.9004 |
| Listeria_monocytogenes_LO28_393132                       | Listeria_monocytogenes_1639_v96 | 0.9212 |
| Listeria_monocytogenes_L99_563174                        | Listeria_monocytogenes_1639_v96 | 0.9011 |
| Listeria_monocytogenes_L312_882094                       | Listeria_monocytogenes_1639_v96 | 0.9573 |
| Listeria_monocytogenes_J1816_930781                      | Listeria_monocytogenes_1639_v96 | 0.9819 |
| Listeria_monocytogenes_J1-220_930782                     | Listeria_monocytogenes_1639_v96 | 0.94   |
| Listeria_monocytogenes_J0161_393130                      | Listeria_monocytogenes_1639_v96 | 0.9275 |
| Listeria_monocytogenes_HCC23_552536                      | Listeria_monocytogenes_1639_v96 | 0.9004 |
| Listeria_monocytogenes_FSL_R2-561_393126                 | Listeria_monocytogenes_1639_v96 | 0.9226 |
| Listeria_monocytogenes_FSL_J1-208_393119                 | Listeria_monocytogenes_1639_v96 | 0.9021 |
| Listeria_monocytogenes_FSL_J1-175_393118                 | Listeria_monocytogenes_1639_v96 | 0.9401 |
| Listeria_monocytogenes_Finland_1998_393127               | Listeria_monocytogenes_1639_v96 | 0.9325 |
| Listeria_monocytogenes_EGD-e_169963_v1                   | Listeria_monocytogenes_1639_v96 | 0.9279 |
| Listeria_monocytogenes_EGD-e_169963                      | Listeria_monocytogenes_1639_v96 | 0.9283 |
| Listeria_monocytogenes_EGD_1334565                       | Listeria_monocytogenes_1639_v96 | 0.925  |
| Listeria_monocytogenes_CFSAN002349_1299895               | Listeria_monocytogenes_1639_v96 | 0.9623 |
| Listeria_monocytogenes_ATCC_19117_882095_v1              | Listeria_monocytogenes_1639_v96 | 0.9507 |
| Listeria_monocytogenes_ATCC_19117_882095                 | Listeria_monocytogenes_1639_v96 | 0.9507 |
| Listeria_monocytogenes_6179_1288295                      | Listeria_monocytogenes_1639_v96 | 0.9186 |
| Listeria_monocytogenes_1639_v9                           | Listeria_monocytogenes_1639_v96 | 0.9232 |
| Listeria_monocytogenes_1639_v99                          | Listeria_monocytogenes_1639_v96 | 0.9956 |
| Listeria_monocytogenes_1639_v98                          | Listeria_monocytogenes_1639_v96 | 0.9263 |
| Listeria_monocytogenes_1639_v97                          | Listeria_monocytogenes_1639_v96 | 0.959  |
| Listeria_monocytogenes_1639_v96                          | Listeria_monocytogenes_1639_v96 | 0.0724 |
| Listeria_welshimeri_1643                                 | Listeria_monocytogenes_1639_v97 | 0.8753 |
| Listeria_welshimeri_serovar_6b_str_SLCC5334_386043       | Listeria_monocytogenes_1639_v97 | 0.875  |
| Listeria_seeligeri_serovar_1_2b_str_SLCC3954_683837      | Listeria_monocytogenes_1639_v97 | 0.8793 |
| Listeria_seeligeri_FSL_S4-171_702452                     | Listeria_monocytogenes_1639_v97 | 0.8311 |
| Listeria_seeligeri_FSL_N1-067_702453                     | Listeria_monocytogenes_1639_v97 | 0.8342 |
| Listeria_seeligeri_1640_v1                               | Listeria_monocytogenes_1639_v97 | 0.8862 |
| Listeria_seeligeri_1640                                  | Listeria_monocytogenes_1639_v97 | 0.8829 |
| Listeria_monocytogenes_WSLC1042_1457188                  | Listeria_monocytogenes_1639_v97 | 0.9637 |
| Listeria_monocytogenes_WSLC1001_1457187                  | Listeria_monocytogenes_1639_v97 | 0.9277 |
| Listeria_monocytogenes_SLCC7179_879090                   | Listeria_monocytogenes_1639_v97 | 0.9358 |
| Listeria_monocytogenes_SLCC5850_882096                   | Listeria_monocytogenes_1639_v97 | 0.9319 |
| Listeria_monocytogenes_SLCC2755_932919                   | Listeria_monocytogenes_1639_v97 | 0.9419 |
| Listeria_monocytogenes_SLCC2540_879089                   | Listeria_monocytogenes_1639_v97 | 0.9394 |
| Listeria_monocytogenes_SLCC2479_882020                   | Listeria_monocytogenes_1639_v97 | 0.929  |
| Listeria_monocytogenes_SLCC2378_879088                   | Listeria_monocytogenes_1639_v97 | 0.9644 |
| Listeria_monocytogenes_SLCC2376_882097                   | Listeria_monocytogenes_1639_v97 | 0.9337 |
| Listeria_monocytogenes_SLCC2372_932920                   | Listeria_monocytogenes_1639_v97 | 0.9217 |
| Listeria_monocytogenes_serotype_4b_str_LL195_1230340     | Listeria_monocytogenes_1639_v97 | 0.9699 |
| Listeria_monocytogenes_serotype_4b_str_LIS0087_1134669   | Listeria_monocytogenes_1639_v97 | 0.9107 |
| Listeria_monocytogenes_serotype_4b_str_F2365_265669      | Listeria_monocytogenes_1639_v97 | 0.9703 |
| Listeria_monocytogenes_serotype_4b_str_CLIP_80459_568819 | Listeria_monocytogenes_1639_v97 | 0.9672 |
| Listeria_monocytogenes_serotype_4b_str_81-0861_1196161   | Listeria_monocytogenes_1639_v97 | 0.9603 |
| Listeria_monocytogenes_serotype_4b_str_81-0592_1196160   | Listeria_monocytogenes_1639_v97 | 0.9614 |
| Listeria_monocytogenes_serotype_4b_str_81-0558_1196159   | Listeria_monocytogenes_1639_v97 | 0.961  |
| Listeria_monocytogenes_serotype_4b_str_10-0809_1196162   | Listeria_monocytogenes_1639_v97 | 0.9618 |
| Listeria_monocytogenes_serotype_4b_str_02-6680_1196175   | Listeria_monocytogenes_1639_v97 | 0.9658 |
| Listeria_monocytogenes_serotype_4b_str_02-6679_1196174   | Listeria_monocytogenes_1639_v97 | 0.9658 |
| Listeria_monocytogenes_serotype_4b_str_02-1792_1196173   | Listeria_monocytogenes_1639_v97 | 0.9603 |
| Listeria_monocytogenes_serotype_4b_str_02-1289_1196172   | Listeria_monocytogenes_1639_v97 | 0.9603 |
| Listeria_monocytogenes_serotype_4b_str_02-1103_1196171   | Listeria_monocytogenes_1639_v97 | 0.9603 |
| Listeria_monocytogenes_serotype_3c_str_10-5027_1196195   | Listeria_monocytogenes_1639_v97 | 0.9289 |
| Listeria_monocytogenes_serotype_1_2c_str_10-5026_1196194 | Listeria_monocytogenes_1639_v97 | 0.9297 |
| Listeria_monocytogenes_serotype_1_2c_str_10-5025_1196193 | Listeria_monocytogenes_1639_v97 | 0.9297 |
| Listeria_monocytogenes_serotype_1_2b_str_10-0811_1196164 | Listeria_monocytogenes_1639_v97 | 0.9375 |
| Listeria_monocytogenes_serotype_1_2b_str_10-0810_1196163 | Listeria_monocytogenes_1639_v97 | 0.9375 |
| Listeria_monocytogenes_serotype_1_2a_str_99-6370_1196179 | Listeria_monocytogenes_1639_v97 | 0.9199 |
| Listeria_monocytogenes_serotype_1_2a_str_98-2035_1196178 | Listeria_monocytogenes_1639_v97 | 0.9199 |
| Listeria_monocytogenes_serotype_1_2a_str_95-0093_1196177 | Listeria_monocytogenes_1639_v97 | 0.9246 |
| Listeria_monocytogenes_serotype_1_2a_str_88-0478_1196176 | Listeria_monocytogenes_1639_v97 | 0.9238 |
| Listeria_monocytogenes_serotype_1_2a_str_10-5024_1196192 | Listeria_monocytogenes_1639_v97 | 0.9246 |
| Listeria_monocytogenes_serotype_1_2a_str_10-4758_1196168 | Listeria_monocytogenes_1639_v97 | 0.9339 |
| Listeria_monocytogenes_serotype_1_2a_str_10-4754_1196167 | Listeria_monocytogenes_1639_v97 | 0.9339 |
| Listeria_monocytogenes_serotype_1_2a_str_10-1321_1196191 | Listeria_monocytogenes_1639_v97 | 0.9246 |
| Listeria_monocytogenes_serotype_1_2a_str_10-1047_1196190 | Listeria_monocytogenes_1639_v97 | 0.9249 |
| Listeria_monocytogenes_serotype_1_2a_str_10-1046_1196189 | Listeria_monocytogenes_1639_v97 | 0.9249 |
| Listeria_monocytogenes_serotype_1_2a_str_10-0934_1196170 | Listeria_monocytogenes_1639_v97 | 0.9388 |
| Listeria_monocytogenes_serotype_1_2a_str_10-0933_1196169 | Listeria_monocytogenes_1639_v97 | 0.9388 |
| Listeria_monocytogenes_serotype_1_2a_str_10-0815_1196188 | Listeria_monocytogenes_1639_v97 | 0.9205 |
| Listeria_monocytogenes_serotype_1_2a_str_10-0814_1196187 | Listeria_monocytogenes_1639_v97 | 0.925  |
| Listeria_monocytogenes_serotype_1_2a_str_10-0813_1196166 | Listeria_monocytogenes_1639_v97 | 0.9291 |
| Listeria_monocytogenes_serotype_1_2a_str_10-0812_1196165 | Listeria_monocytogenes_1639_v97 | 0.9291 |
| Listeria_monocytogenes_serotype_1_2a_str_08-7669_1196186 | Listeria_monocytogenes_1639_v97 | 0.9328 |
| Listeria_monocytogenes_serotype_1_2a_str_08-7374_1196185 | Listeria_monocytogenes_1639_v97 | 0.9246 |
| Listeria_monocytogenes_serotype_1_2a_str_08-6997_1196184 | Listeria_monocytogenes_1639_v97 | 0.9205 |
| Listeria_monocytogenes_serotype_1_2a_str_08-6569_1196183 | Listeria_monocytogenes_1639_v97 | 0.9205 |
| Listeria_monocytogenes_serotype_1_2a_str_08-6056_1196182 | Listeria_monocytogenes_1639_v97 | 0.9205 |
| Listeria_monocytogenes_serotype_1_2a_str_04-5457_1196181 | Listeria_monocytogenes_1639_v97 | 0.9246 |
| Listeria_monocytogenes_serotype_1_2a_str_02-5993_1196180 | Listeria_monocytogenes_1639_v97 | 0.9246 |
| Listeria_monocytogenes_R479a_1437838                     | Listeria_monocytogenes_1639_v97 | 0.9228 |
| Listeria_monocytogenes_N53-1_1234142                     | Listeria_monocytogenes_1639_v97 | 0.891  |
| Listeria_monocytogenes_M7_1030009                        | Listeria_monocytogenes_1639_v97 | 0.9055 |
| Listeria_monocytogenes_LO28_393132                       | Listeria_monocytogenes_1639_v97 | 0.9246 |
| Listeria_monocytogenes_L99_563174                        | Listeria_monocytogenes_1639_v97 | 0.9058 |
| Listeria_monocytogenes_L312_882094                       | Listeria_monocytogenes_1639_v97 | 0.9676 |
| Listeria_monocytogenes_J1816_930781                      | Listeria_monocytogenes_1639_v97 | 0.9586 |
| Listeria_monocytogenes_J1-220_930782                     | Listeria_monocytogenes_1639_v97 | 0.9528 |
| Listeria_monocytogenes_J0161_393130                      | Listeria_monocytogenes_1639_v97 | 0.9351 |

|                                                          |                                 |        |
|----------------------------------------------------------|---------------------------------|--------|
| Listeria_monocytogenes_HCC23_552536                      | Listeria_monocytogenes_1639_v97 | 0.9055 |
| Listeria_monocytogenes_FSL_R2-561_393126                 | Listeria_monocytogenes_1639_v97 | 0.9272 |
| Listeria_monocytogenes_FSL_J1-208_393119                 | Listeria_monocytogenes_1639_v97 | 0.9084 |
| Listeria_monocytogenes_FSL_J1-175_393118                 | Listeria_monocytogenes_1639_v97 | 0.9509 |
| Listeria_monocytogenes_Finland_1998_393127               | Listeria_monocytogenes_1639_v97 | 0.9403 |
| Listeria_monocytogenes_EGD-e_169963_v1                   | Listeria_monocytogenes_1639_v97 | 0.9333 |
| Listeria_monocytogenes_EGD-e_169963                      | Listeria_monocytogenes_1639_v97 | 0.9336 |
| Listeria_monocytogenes_EGD_1334565                       | Listeria_monocytogenes_1639_v97 | 0.9327 |
| Listeria_monocytogenes_CFSAN002349_1299895               | Listeria_monocytogenes_1639_v97 | 0.9688 |
| Listeria_monocytogenes_ATCC_19117_882095_v1              | Listeria_monocytogenes_1639_v97 | 0.9666 |
| Listeria_monocytogenes_ATCC_19117_882095                 | Listeria_monocytogenes_1639_v97 | 0.9662 |
| Listeria_monocytogenes_6179_1288295                      | Listeria_monocytogenes_1639_v97 | 0.9216 |
| Listeria_monocytogenes_1639_v9                           | Listeria_monocytogenes_1639_v97 | 0.9332 |
| Listeria_monocytogenes_1639_v99                          | Listeria_monocytogenes_1639_v97 | 0.9609 |
| Listeria_monocytogenes_1639_v98                          | Listeria_monocytogenes_1639_v97 | 0.9339 |
| Listeria_monocytogenes_1639_v97                          | Listeria_monocytogenes_1639_v97 | 0.068  |
| Listeria_welshimeri_1643                                 | Listeria_monocytogenes_1639_v98 | 0.8613 |
| Listeria_welshimeri_serovar_6b_str_SLCC5334_386043       | Listeria_monocytogenes_1639_v98 | 0.8606 |
| Listeria_seeligeri_serovar_1_2b_str_SLCC3954_683837      | Listeria_monocytogenes_1639_v98 | 0.8743 |
| Listeria_seeligeri_FSL_S4-171_702452                     | Listeria_monocytogenes_1639_v98 | 0.8185 |
| Listeria_seeligeri_FSL_N1-067_702453                     | Listeria_monocytogenes_1639_v98 | 0.8306 |
| Listeria_seeligeri_1640_v1                               | Listeria_monocytogenes_1639_v98 | 0.8683 |
| Listeria_seeligeri_1640                                  | Listeria_monocytogenes_1639_v98 | 0.8768 |
| Listeria_monocytogenes_WSLC1042_1457188                  | Listeria_monocytogenes_1639_v98 | 0.9189 |
| Listeria_monocytogenes_WSLC1001_1457187                  | Listeria_monocytogenes_1639_v98 | 0.9435 |
| Listeria_monocytogenes_SLCC7179_879090                   | Listeria_monocytogenes_1639_v98 | 0.9554 |
| Listeria_monocytogenes_SLCC5850_882096                   | Listeria_monocytogenes_1639_v98 | 0.9459 |
| Listeria_monocytogenes_SLCC2755_932919                   | Listeria_monocytogenes_1639_v98 | 0.9213 |
| Listeria_monocytogenes_SLCC2540_879089                   | Listeria_monocytogenes_1639_v98 | 0.927  |
| Listeria_monocytogenes_SLCC2479_882020                   | Listeria_monocytogenes_1639_v98 | 0.9483 |
| Listeria_monocytogenes_SLCC2378_879088                   | Listeria_monocytogenes_1639_v98 | 0.9202 |
| Listeria_monocytogenes_SLCC2376_882097                   | Listeria_monocytogenes_1639_v98 | 0.9315 |
| Listeria_monocytogenes_SLCC2372_932920                   | Listeria_monocytogenes_1639_v98 | 0.941  |
| Listeria_monocytogenes_serotype_4b_str_LL195_1230340     | Listeria_monocytogenes_1639_v98 | 0.9258 |
| Listeria_monocytogenes_serotype_4b_str_LIS0087_1134669   | Listeria_monocytogenes_1639_v98 | 0.9336 |
| Listeria_monocytogenes_serotype_4b_str_F2365_265669      | Listeria_monocytogenes_1639_v98 | 0.9258 |
| Listeria_monocytogenes_serotype_4b_str_CLIP_80459_568819 | Listeria_monocytogenes_1639_v98 | 0.934  |
| Listeria_monocytogenes_serotype_4b_str_81-0861_1196161   | Listeria_monocytogenes_1639_v98 | 0.9222 |
| Listeria_monocytogenes_serotype_4b_str_81-0592_1196160   | Listeria_monocytogenes_1639_v98 | 0.9233 |
| Listeria_monocytogenes_serotype_4b_str_81-0558_1196159   | Listeria_monocytogenes_1639_v98 | 0.924  |
| Listeria_monocytogenes_serotype_4b_str_10-0809_1196162   | Listeria_monocytogenes_1639_v98 | 0.9233 |
| Listeria_monocytogenes_serotype_4b_str_02-6680_1196175   | Listeria_monocytogenes_1639_v98 | 0.9293 |
| Listeria_monocytogenes_serotype_4b_str_02-6679_1196174   | Listeria_monocytogenes_1639_v98 | 0.9293 |
| Listeria_monocytogenes_serotype_4b_str_02-1792_1196173   | Listeria_monocytogenes_1639_v98 | 0.9248 |
| Listeria_monocytogenes_serotype_4b_str_02-1289_1196172   | Listeria_monocytogenes_1639_v98 | 0.9248 |
| Listeria_monocytogenes_serotype_4b_str_02-1103_1196171   | Listeria_monocytogenes_1639_v98 | 0.9248 |
| Listeria_monocytogenes_serotype_3c_str_10-5027_1196195   | Listeria_monocytogenes_1639_v98 | 0.948  |
| Listeria_monocytogenes_serotype_1_2c_str_10-5026_1196194 | Listeria_monocytogenes_1639_v98 | 0.9487 |
| Listeria_monocytogenes_serotype_1_2c_str_10-5025_1196193 | Listeria_monocytogenes_1639_v98 | 0.9487 |
| Listeria_monocytogenes_serotype_1_2b_str_10-0811_1196164 | Listeria_monocytogenes_1639_v98 | 0.9408 |
| Listeria_monocytogenes_serotype_1_2b_str_10-0810_1196163 | Listeria_monocytogenes_1639_v98 | 0.9408 |
| Listeria_monocytogenes_serotype_1_2a_str_99-6370_1196179 | Listeria_monocytogenes_1639_v98 | 0.9442 |
| Listeria_monocytogenes_serotype_1_2a_str_98-2035_1196178 | Listeria_monocytogenes_1639_v98 | 0.9442 |
| Listeria_monocytogenes_serotype_1_2a_str_95-0093_1196177 | Listeria_monocytogenes_1639_v98 | 0.9406 |
| Listeria_monocytogenes_serotype_1_2a_str_88-0478_1196176 | Listeria_monocytogenes_1639_v98 | 0.9402 |
| Listeria_monocytogenes_serotype_1_2a_str_10-5024_1196192 | Listeria_monocytogenes_1639_v98 | 0.9409 |
| Listeria_monocytogenes_serotype_1_2a_str_10-4758_1196168 | Listeria_monocytogenes_1639_v98 | 0.9444 |
| Listeria_monocytogenes_serotype_1_2a_str_10-4754_1196167 | Listeria_monocytogenes_1639_v98 | 0.9444 |
| Listeria_monocytogenes_serotype_1_2a_str_10-1321_1196191 | Listeria_monocytogenes_1639_v98 | 0.9409 |
| Listeria_monocytogenes_serotype_1_2a_str_10-1047_1196190 | Listeria_monocytogenes_1639_v98 | 0.9409 |
| Listeria_monocytogenes_serotype_1_2a_str_10-1046_1196189 | Listeria_monocytogenes_1639_v98 | 0.9409 |
| Listeria_monocytogenes_serotype_1_2a_str_10-0934_1196170 | Listeria_monocytogenes_1639_v98 | 0.949  |
| Listeria_monocytogenes_serotype_1_2a_str_10-0933_1196169 | Listeria_monocytogenes_1639_v98 | 0.949  |
| Listeria_monocytogenes_serotype_1_2a_str_10-0815_1196188 | Listeria_monocytogenes_1639_v98 | 0.9453 |
| Listeria_monocytogenes_serotype_1_2a_str_10-0814_1196187 | Listeria_monocytogenes_1639_v98 | 0.9406 |
| Listeria_monocytogenes_serotype_1_2a_str_10-0813_1196166 | Listeria_monocytogenes_1639_v98 | 0.9504 |
| Listeria_monocytogenes_serotype_1_2a_str_10-0812_1196165 | Listeria_monocytogenes_1639_v98 | 0.9504 |
| Listeria_monocytogenes_serotype_1_2a_str_08-7669_1196186 | Listeria_monocytogenes_1639_v98 | 0.9478 |
| Listeria_monocytogenes_serotype_1_2a_str_08-7374_1196185 | Listeria_monocytogenes_1639_v98 | 0.9409 |
| Listeria_monocytogenes_serotype_1_2a_str_08-6997_1196184 | Listeria_monocytogenes_1639_v98 | 0.9453 |
| Listeria_monocytogenes_serotype_1_2a_str_08-6569_1196183 | Listeria_monocytogenes_1639_v98 | 0.9453 |
| Listeria_monocytogenes_serotype_1_2a_str_08-6056_1196182 | Listeria_monocytogenes_1639_v98 | 0.9453 |
| Listeria_monocytogenes_serotype_1_2a_str_04-5457_1196181 | Listeria_monocytogenes_1639_v98 | 0.9409 |
| Listeria_monocytogenes_serotype_1_2a_str_02-5993_1196180 | Listeria_monocytogenes_1639_v98 | 0.9406 |
| Listeria_monocytogenes_R479a_1437838                     | Listeria_monocytogenes_1639_v98 | 0.9362 |
| Listeria_monocytogenes_N53-1_1234142                     | Listeria_monocytogenes_1639_v98 | 0.9047 |
| Listeria_monocytogenes_M7_1030009                        | Listeria_monocytogenes_1639_v98 | 0.9086 |
| Listeria_monocytogenes_LO28_393132                       | Listeria_monocytogenes_1639_v98 | 0.9492 |
| Listeria_monocytogenes_L99_563174                        | Listeria_monocytogenes_1639_v98 | 0.9093 |
| Listeria_monocytogenes_L312_882094                       | Listeria_monocytogenes_1639_v98 | 0.934  |
| Listeria_monocytogenes_J1816_930781                      | Listeria_monocytogenes_1639_v98 | 0.9254 |
| Listeria_monocytogenes_J1-220_930782                     | Listeria_monocytogenes_1639_v98 | 0.9224 |
| Listeria_monocytogenes_J0161_393130                      | Listeria_monocytogenes_1639_v98 | 0.9603 |
| Listeria_monocytogenes_HCC23_552536                      | Listeria_monocytogenes_1639_v98 | 0.9089 |
| Listeria_monocytogenes_FSL_R2-561_393126                 | Listeria_monocytogenes_1639_v98 | 0.9462 |
| Listeria_monocytogenes_FSL_J1-208_393119                 | Listeria_monocytogenes_1639_v98 | 0.8973 |
| Listeria_monocytogenes_FSL_J1-175_393118                 | Listeria_monocytogenes_1639_v98 | 0.929  |
| Listeria_monocytogenes_Finland_1998_393127               | Listeria_monocytogenes_1639_v98 | 0.949  |
| Listeria_monocytogenes_EGD-e_169963_v1                   | Listeria_monocytogenes_1639_v98 | 0.9573 |
| Listeria_monocytogenes_EGD-e_169963                      | Listeria_monocytogenes_1639_v98 | 0.9573 |
| Listeria_monocytogenes_EGD_1334565                       | Listeria_monocytogenes_1639_v98 | 0.9466 |

|                                                          |                                 |        |
|----------------------------------------------------------|---------------------------------|--------|
| Listeria_monocytogenes_CFSAN002349_1299895               | Listeria_monocytogenes_1639_v98 | 0.929  |
| Listeria_monocytogenes_ATCC_19117_882095_v1              | Listeria_monocytogenes_1639_v98 | 0.9261 |
| Listeria_monocytogenes_ATCC_19117_882095                 | Listeria_monocytogenes_1639_v98 | 0.926  |
| Listeria_monocytogenes_6179_1288295                      | Listeria_monocytogenes_1639_v98 | 0.9429 |
| Listeria_monocytogenes_1639_v9                           | Listeria_monocytogenes_1639_v98 | 0.9266 |
| Listeria_monocytogenes_1639_v99                          | Listeria_monocytogenes_1639_v98 | 0.9281 |
| Listeria_monocytogenes_1639_v98                          | Listeria_monocytogenes_1639_v98 | 0.0725 |
| Listeria_welshimeri_1643                                 | Listeria_monocytogenes_1639_v99 | 0.868  |
| Listeria_welshimeri_serovar_6b_str_SLCC5334_386043       | Listeria_monocytogenes_1639_v99 | 0.8673 |
| Listeria_seeligeri_serovar_1_2b_str_SLCC3954_683837      | Listeria_monocytogenes_1639_v99 | 0.8746 |
| Listeria_seeligeri_FSL_S4-171_702452                     | Listeria_monocytogenes_1639_v99 | 0.8282 |
| Listeria_seeligeri_FSL_N1-067_702453                     | Listeria_monocytogenes_1639_v99 | 0.8336 |
| Listeria_seeligeri_1640_v1                               | Listeria_monocytogenes_1639_v99 | 0.8826 |
| Listeria_seeligeri_1640                                  | Listeria_monocytogenes_1639_v99 | 0.88   |
| Listeria_monocytogenes_WSLC1042_1457188                  | Listeria_monocytogenes_1639_v99 | 0.949  |
| Listeria_monocytogenes_WSLC1001_1457187                  | Listeria_monocytogenes_1639_v99 | 0.9223 |
| Listeria_monocytogenes_SLCC7179_879090                   | Listeria_monocytogenes_1639_v99 | 0.9277 |
| Listeria_monocytogenes_SLCC5850_882096                   | Listeria_monocytogenes_1639_v99 | 0.9269 |
| Listeria_monocytogenes_SLCC2755_932919                   | Listeria_monocytogenes_1639_v99 | 0.9412 |
| Listeria_monocytogenes_SLCC2540_879089                   | Listeria_monocytogenes_1639_v99 | 0.9335 |
| Listeria_monocytogenes_SLCC2479_882020                   | Listeria_monocytogenes_1639_v99 | 0.9255 |
| Listeria_monocytogenes_SLCC2378_879088                   | Listeria_monocytogenes_1639_v99 | 0.9505 |
| Listeria_monocytogenes_SLCC2376_882097                   | Listeria_monocytogenes_1639_v99 | 0.929  |
| Listeria_monocytogenes_SLCC2372_932920                   | Listeria_monocytogenes_1639_v99 | 0.9272 |
| Listeria_monocytogenes_serotype_4b_str_LL195_1230340     | Listeria_monocytogenes_1639_v99 | 0.9562 |
| Listeria_monocytogenes_serotype_4b_str_LIS0087_1134669   | Listeria_monocytogenes_1639_v99 | 0.9081 |
| Listeria_monocytogenes_serotype_4b_str_F2365_265669      | Listeria_monocytogenes_1639_v99 | 0.9562 |
| Listeria_monocytogenes_serotype_4b_str_CLIP_80459_568819 | Listeria_monocytogenes_1639_v99 | 0.958  |
| Listeria_monocytogenes_serotype_4b_str_81-0861_1196161   | Listeria_monocytogenes_1639_v99 | 0.9473 |
| Listeria_monocytogenes_serotype_4b_str_81-0592_1196160   | Listeria_monocytogenes_1639_v99 | 0.9484 |
| Listeria_monocytogenes_serotype_4b_str_81-0558_1196159   | Listeria_monocytogenes_1639_v99 | 0.9483 |
| Listeria_monocytogenes_serotype_4b_str_10-0809_1196162   | Listeria_monocytogenes_1639_v99 | 0.9487 |
| Listeria_monocytogenes_serotype_4b_str_02-6680_1196175   | Listeria_monocytogenes_1639_v99 | 0.9551 |
| Listeria_monocytogenes_serotype_4b_str_02-6679_1196174   | Listeria_monocytogenes_1639_v99 | 0.9551 |
| Listeria_monocytogenes_serotype_4b_str_02-1792_1196173   | Listeria_monocytogenes_1639_v99 | 0.9495 |
| Listeria_monocytogenes_serotype_4b_str_02-1289_1196172   | Listeria_monocytogenes_1639_v99 | 0.9495 |
| Listeria_monocytogenes_serotype_4b_str_02-1103_1196171   | Listeria_monocytogenes_1639_v99 | 0.9495 |
| Listeria_monocytogenes_serotype_3c_str_10-5027_1196195   | Listeria_monocytogenes_1639_v99 | 0.9262 |
| Listeria_monocytogenes_serotype_1_2c_str_10-5026_1196194 | Listeria_monocytogenes_1639_v99 | 0.9273 |
| Listeria_monocytogenes_serotype_1_2c_str_10-5025_1196193 | Listeria_monocytogenes_1639_v99 | 0.9273 |
| Listeria_monocytogenes_serotype_1_2b_str_10-0811_1196164 | Listeria_monocytogenes_1639_v99 | 0.9365 |
| Listeria_monocytogenes_serotype_1_2b_str_10-0810_1196163 | Listeria_monocytogenes_1639_v99 | 0.9365 |
| Listeria_monocytogenes_serotype_1_2a_str_99-6370_1196179 | Listeria_monocytogenes_1639_v99 | 0.9165 |
| Listeria_monocytogenes_serotype_1_2a_str_98-2035_1196178 | Listeria_monocytogenes_1639_v99 | 0.9165 |
| Listeria_monocytogenes_serotype_1_2a_str_95-0093_1196177 | Listeria_monocytogenes_1639_v99 | 0.9208 |
| Listeria_monocytogenes_serotype_1_2a_str_88-0478_1196176 | Listeria_monocytogenes_1639_v99 | 0.9204 |
| Listeria_monocytogenes_serotype_1_2a_str_10-5024_1196192 | Listeria_monocytogenes_1639_v99 | 0.9211 |
| Listeria_monocytogenes_serotype_1_2a_str_10-4758_1196168 | Listeria_monocytogenes_1639_v99 | 0.9258 |
| Listeria_monocytogenes_serotype_1_2a_str_10-4754_1196167 | Listeria_monocytogenes_1639_v99 | 0.9255 |
| Listeria_monocytogenes_serotype_1_2a_str_10-1321_1196191 | Listeria_monocytogenes_1639_v99 | 0.9211 |
| Listeria_monocytogenes_serotype_1_2a_str_10-1047_1196190 | Listeria_monocytogenes_1639_v99 | 0.9215 |
| Listeria_monocytogenes_serotype_1_2a_str_10-1046_1196189 | Listeria_monocytogenes_1639_v99 | 0.9215 |
| Listeria_monocytogenes_serotype_1_2a_str_10-0934_1196170 | Listeria_monocytogenes_1639_v99 | 0.9329 |
| Listeria_monocytogenes_serotype_1_2a_str_10-0933_1196169 | Listeria_monocytogenes_1639_v99 | 0.9329 |
| Listeria_monocytogenes_serotype_1_2a_str_10-0815_1196188 | Listeria_monocytogenes_1639_v99 | 0.9172 |
| Listeria_monocytogenes_serotype_1_2a_str_10-0814_1196187 | Listeria_monocytogenes_1639_v99 | 0.9212 |
| Listeria_monocytogenes_serotype_1_2a_str_10-0813_1196166 | Listeria_monocytogenes_1639_v99 | 0.9248 |
| Listeria_monocytogenes_serotype_1_2a_str_10-0812_1196165 | Listeria_monocytogenes_1639_v99 | 0.9248 |
| Listeria_monocytogenes_serotype_1_2a_str_08-7669_1196186 | Listeria_monocytogenes_1639_v99 | 0.9293 |
| Listeria_monocytogenes_serotype_1_2a_str_08-7374_1196185 | Listeria_monocytogenes_1639_v99 | 0.9211 |
| Listeria_monocytogenes_serotype_1_2a_str_08-6997_1196184 | Listeria_monocytogenes_1639_v99 | 0.9172 |
| Listeria_monocytogenes_serotype_1_2a_str_08-6569_1196183 | Listeria_monocytogenes_1639_v99 | 0.9172 |
| Listeria_monocytogenes_serotype_1_2a_str_08-6056_1196182 | Listeria_monocytogenes_1639_v99 | 0.9172 |
| Listeria_monocytogenes_serotype_1_2a_str_04-5457_1196181 | Listeria_monocytogenes_1639_v99 | 0.9211 |
| Listeria_monocytogenes_serotype_1_2a_str_02-5993_1196180 | Listeria_monocytogenes_1639_v99 | 0.9208 |
| Listeria_monocytogenes_R479a_1437838                     | Listeria_monocytogenes_1639_v99 | 0.9249 |
| Listeria_monocytogenes_N53-1_1234142                     | Listeria_monocytogenes_1639_v99 | 0.8835 |
| Listeria_monocytogenes_M7_1030009                        | Listeria_monocytogenes_1639_v99 | 0.9029 |
| Listeria_monocytogenes_LO28_393132                       | Listeria_monocytogenes_1639_v99 | 0.9208 |
| Listeria_monocytogenes_L99_563174                        | Listeria_monocytogenes_1639_v99 | 0.9036 |
| Listeria_monocytogenes_L312_882094                       | Listeria_monocytogenes_1639_v99 | 0.9584 |
| Listeria_monocytogenes_J1816_930781                      | Listeria_monocytogenes_1639_v99 | 0.9789 |
| Listeria_monocytogenes_J1-220_930782                     | Listeria_monocytogenes_1639_v99 | 0.9399 |
| Listeria_monocytogenes_J0161_393130                      | Listeria_monocytogenes_1639_v99 | 0.9274 |
| Listeria_monocytogenes_HCC23_552536                      | Listeria_monocytogenes_1639_v99 | 0.9029 |
| Listeria_monocytogenes_FSL_R2-561_393126                 | Listeria_monocytogenes_1639_v99 | 0.9233 |
| Listeria_monocytogenes_FSL_J1-208_393119                 | Listeria_monocytogenes_1639_v99 | 0.9032 |
| Listeria_monocytogenes_FSL_J1-175_393118                 | Listeria_monocytogenes_1639_v99 | 0.94   |
| Listeria_monocytogenes_Finland_1998_393127               | Listeria_monocytogenes_1639_v99 | 0.9336 |
| Listeria_monocytogenes_EGD-e_169963_v1                   | Listeria_monocytogenes_1639_v99 | 0.9297 |
| Listeria_monocytogenes_EGD-e_169963                      | Listeria_monocytogenes_1639_v99 | 0.9301 |
| Listeria_monocytogenes_EGD_1334565                       | Listeria_monocytogenes_1639_v99 | 0.9276 |
| Listeria_monocytogenes_CFSAN002349_1299895               | Listeria_monocytogenes_1639_v99 | 0.9631 |
| Listeria_monocytogenes_ATCC_19117_882095_v1              | Listeria_monocytogenes_1639_v99 | 0.9514 |
| Listeria_monocytogenes_ATCC_19117_882095                 | Listeria_monocytogenes_1639_v99 | 0.9514 |
| Listeria_monocytogenes_6179_1288295                      | Listeria_monocytogenes_1639_v99 | 0.9196 |
| Listeria_monocytogenes_1639_v9                           | Listeria_monocytogenes_1639_v99 | 0.9239 |
| Listeria_monocytogenes_1639_v99                          | Listeria_monocytogenes_1639_v99 | 0.0718 |
| Listeria_welshimeri_1643                                 | Listeria_monocytogenes_1639_v9  | 0.8545 |
| Listeria_welshimeri_serovar_6b_str_SLCC5334_386043       | Listeria_monocytogenes_1639_v9  | 0.8542 |
| Listeria_seeligeri_serovar_1_2b_str_SLCC3954_683837      | Listeria_monocytogenes_1639_v9  | 0.8608 |

|                                                          |                                     |        |
|----------------------------------------------------------|-------------------------------------|--------|
| Listeria_seeligeri_FSL_S4-171_702452                     | Listeria_monocytogenes_1639_v9      | 0.8063 |
| Listeria_seeligeri_FSL_N1-067_702453                     | Listeria_monocytogenes_1639_v9      | 0.827  |
| Listeria_seeligeri_1640_v1                               | Listeria_monocytogenes_1639_v9      | 0.864  |
| Listeria_seeligeri_1640                                  | Listeria_monocytogenes_1639_v9      | 0.8819 |
| Listeria_monocytogenes_WSLC1042_1457188                  | Listeria_monocytogenes_1639_v9      | 0.9232 |
| Listeria_monocytogenes_WSLC1001_1457187                  | Listeria_monocytogenes_1639_v9      | 0.9228 |
| Listeria_monocytogenes_SLCC7179_879090                   | Listeria_monocytogenes_1639_v9      | 0.9232 |
| Listeria_monocytogenes_SLCC5850_882096                   | Listeria_monocytogenes_1639_v9      | 0.924  |
| Listeria_monocytogenes_SLCC2755_932919                   | Listeria_monocytogenes_1639_v9      | 0.9224 |
| Listeria_monocytogenes_SLCC2540_879089                   | Listeria_monocytogenes_1639_v9      | 0.9423 |
| Listeria_monocytogenes_SLCC2479_882020                   | Listeria_monocytogenes_1639_v9      | 0.9288 |
| Listeria_monocytogenes_SLCC2378_879088                   | Listeria_monocytogenes_1639_v9      | 0.9243 |
| Listeria_monocytogenes_SLCC2376_882097                   | Listeria_monocytogenes_1639_v9      | 0.9075 |
| Listeria_monocytogenes_SLCC2372_932920                   | Listeria_monocytogenes_1639_v9      | 0.9214 |
| Listeria_monocytogenes_serotype_4b_str_LL195_1230340     | Listeria_monocytogenes_1639_v9      | 0.929  |
| Listeria_monocytogenes_serotype_4b_str_LIS0087_1134669   | Listeria_monocytogenes_1639_v9      | 0.9136 |
| Listeria_monocytogenes_serotype_4b_str_F2365_265669      | Listeria_monocytogenes_1639_v9      | 0.929  |
| Listeria_monocytogenes_serotype_4b_str_CLIP_80459_568819 | Listeria_monocytogenes_1639_v9      | 0.9274 |
| Listeria_monocytogenes_serotype_4b_str_81-0861_1196161   | Listeria_monocytogenes_1639_v9      | 0.9262 |
| Listeria_monocytogenes_serotype_4b_str_81-0592_1196160   | Listeria_monocytogenes_1639_v9      | 0.9272 |
| Listeria_monocytogenes_serotype_4b_str_81-0558_1196159   | Listeria_monocytogenes_1639_v9      | 0.9261 |
| Listeria_monocytogenes_serotype_4b_str_10-0809_1196162   | Listeria_monocytogenes_1639_v9      | 0.9272 |
| Listeria_monocytogenes_serotype_4b_str_02-6680_1196175   | Listeria_monocytogenes_1639_v9      | 0.9287 |
| Listeria_monocytogenes_serotype_4b_str_02-6679_1196174   | Listeria_monocytogenes_1639_v9      | 0.9287 |
| Listeria_monocytogenes_serotype_4b_str_02-1792_1196173   | Listeria_monocytogenes_1639_v9      | 0.9294 |
| Listeria_monocytogenes_serotype_4b_str_02-1289_1196172   | Listeria_monocytogenes_1639_v9      | 0.9294 |
| Listeria_monocytogenes_serotype_4b_str_02-1103_1196171   | Listeria_monocytogenes_1639_v9      | 0.9294 |
| Listeria_monocytogenes_serotype_3c_str_10-5027_1196195   | Listeria_monocytogenes_1639_v9      | 0.9335 |
| Listeria_monocytogenes_serotype_1_2c_str_10-5026_1196194 | Listeria_monocytogenes_1639_v9      | 0.9339 |
| Listeria_monocytogenes_serotype_1_2c_str_10-5025_1196193 | Listeria_monocytogenes_1639_v9      | 0.9339 |
| Listeria_monocytogenes_serotype_1_2b_str_10-0811_1196164 | Listeria_monocytogenes_1639_v9      | 0.9451 |
| Listeria_monocytogenes_serotype_1_2b_str_10-0810_1196163 | Listeria_monocytogenes_1639_v9      | 0.9451 |
| Listeria_monocytogenes_serotype_1_2a_str_99-6370_1196179 | Listeria_monocytogenes_1639_v9      | 0.9182 |
| Listeria_monocytogenes_serotype_1_2a_str_98-2035_1196178 | Listeria_monocytogenes_1639_v9      | 0.9182 |
| Listeria_monocytogenes_serotype_1_2a_str_95-0093_1196177 | Listeria_monocytogenes_1639_v9      | 0.9227 |
| Listeria_monocytogenes_serotype_1_2a_str_88-0478_1196176 | Listeria_monocytogenes_1639_v9      | 0.9213 |
| Listeria_monocytogenes_serotype_1_2a_str_10-5024_1196192 | Listeria_monocytogenes_1639_v9      | 0.9227 |
| Listeria_monocytogenes_serotype_1_2a_str_10-4758_1196168 | Listeria_monocytogenes_1639_v9      | 0.9252 |
| Listeria_monocytogenes_serotype_1_2a_str_10-4754_1196167 | Listeria_monocytogenes_1639_v9      | 0.9255 |
| Listeria_monocytogenes_serotype_1_2a_str_10-1321_1196191 | Listeria_monocytogenes_1639_v9      | 0.9227 |
| Listeria_monocytogenes_serotype_1_2a_str_10-1047_1196190 | Listeria_monocytogenes_1639_v9      | 0.922  |
| Listeria_monocytogenes_serotype_1_2a_str_10-1046_1196189 | Listeria_monocytogenes_1639_v9      | 0.922  |
| Listeria_monocytogenes_serotype_1_2a_str_10-0934_1196170 | Listeria_monocytogenes_1639_v9      | 0.9201 |
| Listeria_monocytogenes_serotype_1_2a_str_10-0933_1196169 | Listeria_monocytogenes_1639_v9      | 0.9201 |
| Listeria_monocytogenes_serotype_1_2a_str_10-0815_1196188 | Listeria_monocytogenes_1639_v9      | 0.9191 |
| Listeria_monocytogenes_serotype_1_2a_str_10-0814_1196187 | Listeria_monocytogenes_1639_v9      | 0.9231 |
| Listeria_monocytogenes_serotype_1_2a_str_10-0813_1196166 | Listeria_monocytogenes_1639_v9      | 0.93   |
| Listeria_monocytogenes_serotype_1_2a_str_10-0812_1196165 | Listeria_monocytogenes_1639_v9      | 0.93   |
| Listeria_monocytogenes_serotype_1_2a_str_08-7669_1196186 | Listeria_monocytogenes_1639_v9      | 0.9165 |
| Listeria_monocytogenes_serotype_1_2a_str_08-7374_1196185 | Listeria_monocytogenes_1639_v9      | 0.9227 |
| Listeria_monocytogenes_serotype_1_2a_str_08-6997_1196184 | Listeria_monocytogenes_1639_v9      | 0.9191 |
| Listeria_monocytogenes_serotype_1_2a_str_08-6569_1196183 | Listeria_monocytogenes_1639_v9      | 0.9191 |
| Listeria_monocytogenes_serotype_1_2a_str_08-6056_1196182 | Listeria_monocytogenes_1639_v9      | 0.9191 |
| Listeria_monocytogenes_serotype_1_2a_str_04-5457_1196181 | Listeria_monocytogenes_1639_v9      | 0.9227 |
| Listeria_monocytogenes_serotype_1_2a_str_02-5993_1196180 | Listeria_monocytogenes_1639_v9      | 0.9227 |
| Listeria_monocytogenes_R479a_1437838                     | Listeria_monocytogenes_1639_v9      | 0.9188 |
| Listeria_monocytogenes_N53-1_1234142                     | Listeria_monocytogenes_1639_v9      | 0.876  |
| Listeria_monocytogenes_M7_1030009                        | Listeria_monocytogenes_1639_v9      | 0.8989 |
| Listeria_monocytogenes_LO28_393132                       | Listeria_monocytogenes_1639_v9      | 0.9289 |
| Listeria_monocytogenes_L99_563174                        | Listeria_monocytogenes_1639_v9      | 0.8993 |
| Listeria_monocytogenes_L312_882094                       | Listeria_monocytogenes_1639_v9      | 0.9278 |
| Listeria_monocytogenes_J1816_930781                      | Listeria_monocytogenes_1639_v9      | 0.9231 |
| Listeria_monocytogenes_J1-220_930782                     | Listeria_monocytogenes_1639_v9      | 0.9318 |
| Listeria_monocytogenes_J0161_393130                      | Listeria_monocytogenes_1639_v9      | 0.93   |
| Listeria_monocytogenes_HCC23_552536                      | Listeria_monocytogenes_1639_v9      | 0.8986 |
| Listeria_monocytogenes_FSL_R2-561_393126                 | Listeria_monocytogenes_1639_v9      | 0.9292 |
| Listeria_monocytogenes_FSL_J1-208_393119                 | Listeria_monocytogenes_1639_v9      | 0.8844 |
| Listeria_monocytogenes_FSL_J1-175_393118                 | Listeria_monocytogenes_1639_v9      | 0.9635 |
| Listeria_monocytogenes_Finland_1998_393127               | Listeria_monocytogenes_1639_v9      | 0.9178 |
| Listeria_monocytogenes_EGD-e_169963_v1                   | Listeria_monocytogenes_1639_v9      | 0.926  |
| Listeria_monocytogenes_EGD-e_169963                      | Listeria_monocytogenes_1639_v9      | 0.9264 |
| Listeria_monocytogenes_EGD_1334565                       | Listeria_monocytogenes_1639_v9      | 0.9247 |
| Listeria_monocytogenes_CFSAN002349_1299895               | Listeria_monocytogenes_1639_v9      | 0.9317 |
| Listeria_monocytogenes_ATCC_19117_882095_v1              | Listeria_monocytogenes_1639_v9      | 0.9266 |
| Listeria_monocytogenes_ATCC_19117_882095                 | Listeria_monocytogenes_1639_v9      | 0.9263 |
| Listeria_monocytogenes_6179_1288295                      | Listeria_monocytogenes_1639_v9      | 0.9288 |
| Listeria_monocytogenes_1639_v9                           | Listeria_monocytogenes_1639_v9      | 0.0793 |
| Listeria_welshimeri_1643                                 | Listeria_monocytogenes_6179_1288295 | 0.8585 |
| Listeria_welshimeri_serovar_6b_str_SLCC5334_386043       | Listeria_monocytogenes_6179_1288295 | 0.8579 |
| Listeria_seeligeri_serovar_1_2b_str_SLCC3954_683837      | Listeria_monocytogenes_6179_1288295 | 0.8627 |
| Listeria_seeligeri_FSL_S4-171_702452                     | Listeria_monocytogenes_6179_1288295 | 0.8068 |
| Listeria_seeligeri_FSL_N1-067_702453                     | Listeria_monocytogenes_6179_1288295 | 0.8343 |
| Listeria_seeligeri_1640_v1                               | Listeria_monocytogenes_6179_1288295 | 0.8632 |
| Listeria_seeligeri_1640                                  | Listeria_monocytogenes_6179_1288295 | 0.8691 |
| Listeria_monocytogenes_WSLC1042_1457188                  | Listeria_monocytogenes_6179_1288295 | 0.9075 |
| Listeria_monocytogenes_WSLC1001_1457187                  | Listeria_monocytogenes_6179_1288295 | 0.9425 |
| Listeria_monocytogenes_SLCC7179_879090                   | Listeria_monocytogenes_6179_1288295 | 0.9435 |
| Listeria_monocytogenes_SLCC5850_882096                   | Listeria_monocytogenes_6179_1288295 | 0.9434 |
| Listeria_monocytogenes_SLCC2755_932919                   | Listeria_monocytogenes_6179_1288295 | 0.9192 |
| Listeria_monocytogenes_SLCC2540_879089                   | Listeria_monocytogenes_6179_1288295 | 0.9274 |
| Listeria_monocytogenes_SLCC2479_882020                   | Listeria_monocytogenes_6179_1288295 | 0.944  |

|                                                          |                                          |        |
|----------------------------------------------------------|------------------------------------------|--------|
| Listeria_monocytogenes_SLCC2378_879088                   | Listeria_monocytogenes_6179_1288295      | 0.9089 |
| Listeria_monocytogenes_SLCC2376_882097                   | Listeria_monocytogenes_6179_1288295      | 0.9144 |
| Listeria_monocytogenes_SLCC2372_932920                   | Listeria_monocytogenes_6179_1288295      | 0.9459 |
| Listeria_monocytogenes_serotype_4b_str_LL195_1230340     | Listeria_monocytogenes_6179_1288295      | 0.9142 |
| Listeria_monocytogenes_serotype_4b_str_LIS0087_1134669   | Listeria_monocytogenes_6179_1288295      | 0.9298 |
| Listeria_monocytogenes_serotype_4b_str_F2365_265669      | Listeria_monocytogenes_6179_1288295      | 0.9142 |
| Listeria_monocytogenes_serotype_4b_str_CLIP_80459_568819 | Listeria_monocytogenes_6179_1288295      | 0.9156 |
| Listeria_monocytogenes_serotype_4b_str_81-0861_1196161   | Listeria_monocytogenes_6179_1288295      | 0.9128 |
| Listeria_monocytogenes_serotype_4b_str_81-0592_1196160   | Listeria_monocytogenes_6179_1288295      | 0.9138 |
| Listeria_monocytogenes_serotype_4b_str_81-0558_1196159   | Listeria_monocytogenes_6179_1288295      | 0.9145 |
| Listeria_monocytogenes_serotype_4b_str_10-0809_1196162   | Listeria_monocytogenes_6179_1288295      | 0.9138 |
| Listeria_monocytogenes_serotype_4b_str_02-6680_1196175   | Listeria_monocytogenes_6179_1288295      | 0.914  |
| Listeria_monocytogenes_serotype_4b_str_02-6679_1196174   | Listeria_monocytogenes_6179_1288295      | 0.914  |
| Listeria_monocytogenes_serotype_4b_str_02-1792_1196173   | Listeria_monocytogenes_6179_1288295      | 0.9153 |
| Listeria_monocytogenes_serotype_4b_str_02-1289_1196172   | Listeria_monocytogenes_6179_1288295      | 0.9153 |
| Listeria_monocytogenes_serotype_4b_str_02-1103_1196171   | Listeria_monocytogenes_6179_1288295      | 0.9153 |
| Listeria_monocytogenes_serotype_3c_str_10-5027_1196195   | Listeria_monocytogenes_6179_1288295      | 0.9484 |
| Listeria_monocytogenes_serotype_1_2c_str_10-5026_1196194 | Listeria_monocytogenes_6179_1288295      | 0.948  |
| Listeria_monocytogenes_serotype_1_2c_str_10-5025_1196193 | Listeria_monocytogenes_6179_1288295      | 0.948  |
| Listeria_monocytogenes_serotype_1_2b_str_10-0811_1196164 | Listeria_monocytogenes_6179_1288295      | 0.9315 |
| Listeria_monocytogenes_serotype_1_2b_str_10-0810_1196163 | Listeria_monocytogenes_6179_1288295      | 0.9315 |
| Listeria_monocytogenes_serotype_1_2a_str_99-6370_1196179 | Listeria_monocytogenes_6179_1288295      | 0.9375 |
| Listeria_monocytogenes_serotype_1_2a_str_98-2035_1196178 | Listeria_monocytogenes_6179_1288295      | 0.9375 |
| Listeria_monocytogenes_serotype_1_2a_str_95-0093_1196177 | Listeria_monocytogenes_6179_1288295      | 0.9418 |
| Listeria_monocytogenes_serotype_1_2a_str_88-0478_1196176 | Listeria_monocytogenes_6179_1288295      | 0.941  |
| Listeria_monocytogenes_serotype_1_2a_str_10-5024_1196192 | Listeria_monocytogenes_6179_1288295      | 0.9425 |
| Listeria_monocytogenes_serotype_1_2a_str_10-4758_1196168 | Listeria_monocytogenes_6179_1288295      | 0.9445 |
| Listeria_monocytogenes_serotype_1_2a_str_10-4754_1196167 | Listeria_monocytogenes_6179_1288295      | 0.9445 |
| Listeria_monocytogenes_serotype_1_2a_str_10-1321_1196191 | Listeria_monocytogenes_6179_1288295      | 0.9425 |
| Listeria_monocytogenes_serotype_1_2a_str_10-1047_1196190 | Listeria_monocytogenes_6179_1288295      | 0.9418 |
| Listeria_monocytogenes_serotype_1_2a_str_10-1046_1196189 | Listeria_monocytogenes_6179_1288295      | 0.9418 |
| Listeria_monocytogenes_serotype_1_2a_str_10-0934_1196170 | Listeria_monocytogenes_6179_1288295      | 0.9408 |
| Listeria_monocytogenes_serotype_1_2a_str_10-0933_1196169 | Listeria_monocytogenes_6179_1288295      | 0.9408 |
| Listeria_monocytogenes_serotype_1_2a_str_10-0815_1196188 | Listeria_monocytogenes_6179_1288295      | 0.9377 |
| Listeria_monocytogenes_serotype_1_2a_str_10-0814_1196187 | Listeria_monocytogenes_6179_1288295      | 0.9422 |
| Listeria_monocytogenes_serotype_1_2a_str_10-0813_1196166 | Listeria_monocytogenes_6179_1288295      | 0.9511 |
| Listeria_monocytogenes_serotype_1_2a_str_10-0812_1196165 | Listeria_monocytogenes_6179_1288295      | 0.9511 |
| Listeria_monocytogenes_serotype_1_2a_str_08-7669_1196186 | Listeria_monocytogenes_6179_1288295      | 0.9368 |
| Listeria_monocytogenes_serotype_1_2a_str_08-7374_1196185 | Listeria_monocytogenes_6179_1288295      | 0.9425 |
| Listeria_monocytogenes_serotype_1_2a_str_08-6997_1196184 | Listeria_monocytogenes_6179_1288295      | 0.9377 |
| Listeria_monocytogenes_serotype_1_2a_str_08-6569_1196183 | Listeria_monocytogenes_6179_1288295      | 0.9377 |
| Listeria_monocytogenes_serotype_1_2a_str_08-6056_1196182 | Listeria_monocytogenes_6179_1288295      | 0.9377 |
| Listeria_monocytogenes_serotype_1_2a_str_04-5457_1196181 | Listeria_monocytogenes_6179_1288295      | 0.9425 |
| Listeria_monocytogenes_serotype_1_2a_str_02-5993_1196180 | Listeria_monocytogenes_6179_1288295      | 0.9422 |
| Listeria_monocytogenes_R479a_1437838                     | Listeria_monocytogenes_6179_1288295      | 0.9506 |
| Listeria_monocytogenes_N53-1_1234142                     | Listeria_monocytogenes_6179_1288295      | 0.8982 |
| Listeria_monocytogenes_M7_1030009                        | Listeria_monocytogenes_6179_1288295      | 0.9085 |
| Listeria_monocytogenes_LO28_393132                       | Listeria_monocytogenes_6179_1288295      | 0.9452 |
| Listeria_monocytogenes_L99_563174                        | Listeria_monocytogenes_6179_1288295      | 0.9092 |
| Listeria_monocytogenes_L312_882094                       | Listeria_monocytogenes_6179_1288295      | 0.9156 |
| Listeria_monocytogenes_J1816_930781                      | Listeria_monocytogenes_6179_1288295      | 0.9134 |
| Listeria_monocytogenes_J1-220_930782                     | Listeria_monocytogenes_6179_1288295      | 0.9185 |
| Listeria_monocytogenes_J0161_393130                      | Listeria_monocytogenes_6179_1288295      | 0.9536 |
| Listeria_monocytogenes_HCC23_552536                      | Listeria_monocytogenes_6179_1288295      | 0.9085 |
| Listeria_monocytogenes_FSL_R2-561_393126                 | Listeria_monocytogenes_6179_1288295      | 0.9444 |
| Listeria_monocytogenes_FSL_J1-208_393119                 | Listeria_monocytogenes_6179_1288295      | 0.8863 |
| Listeria_monocytogenes_FSL_J1-175_393118                 | Listeria_monocytogenes_6179_1288295      | 0.9319 |
| Listeria_monocytogenes_Finland_1998_393127               | Listeria_monocytogenes_6179_1288295      | 0.9386 |
| Listeria_monocytogenes_EGD-e_169963_v1                   | Listeria_monocytogenes_6179_1288295      | 0.9424 |
| Listeria_monocytogenes_EGD-e_169963                      | Listeria_monocytogenes_6179_1288295      | 0.9424 |
| Listeria_monocytogenes_EGD_1334565                       | Listeria_monocytogenes_6179_1288295      | 0.9441 |
| Listeria_monocytogenes_CFSAN002349_1299895               | Listeria_monocytogenes_6179_1288295      | 0.9156 |
| Listeria_monocytogenes_ATCC_19117_882095_v1              | Listeria_monocytogenes_6179_1288295      | 0.9123 |
| Listeria_monocytogenes_ATCC_19117_882095                 | Listeria_monocytogenes_6179_1288295      | 0.9123 |
| Listeria_monocytogenes_6179_1288295                      | Listeria_monocytogenes_6179_1288295      | 0.075  |
| Listeria_welshimeri_1643                                 | Listeria_monocytogenes_ATCC_19117_882095 | 0.891  |
| Listeria_welshimeri_serovar_6b_str_SLCC5334_386043       | Listeria_monocytogenes_ATCC_19117_882095 | 0.8903 |
| Listeria_seeligeri_serovar_1_2b_str_SLCC3954_683837      | Listeria_monocytogenes_ATCC_19117_882095 | 0.8875 |
| Listeria_seeligeri_FSL_S4-171_702452                     | Listeria_monocytogenes_ATCC_19117_882095 | 0.8286 |
| Listeria_seeligeri_FSL_N1-067_702453                     | Listeria_monocytogenes_ATCC_19117_882095 | 0.8299 |
| Listeria_seeligeri_1640_v1                               | Listeria_monocytogenes_ATCC_19117_882095 | 0.8944 |
| Listeria_seeligeri_1640                                  | Listeria_monocytogenes_ATCC_19117_882095 | 0.8813 |
| Listeria_monocytogenes_WSLC1042_1457188                  | Listeria_monocytogenes_ATCC_19117_882095 | 0.9805 |
| Listeria_monocytogenes_WSLC1001_1457187                  | Listeria_monocytogenes_ATCC_19117_882095 | 0.932  |
| Listeria_monocytogenes_SLCC7179_879090                   | Listeria_monocytogenes_ATCC_19117_882095 | 0.9386 |
| Listeria_monocytogenes_SLCC5850_882096                   | Listeria_monocytogenes_ATCC_19117_882095 | 0.9362 |
| Listeria_monocytogenes_SLCC2755_932919                   | Listeria_monocytogenes_ATCC_19117_882095 | 0.9451 |
| Listeria_monocytogenes_SLCC2540_879089                   | Listeria_monocytogenes_ATCC_19117_882095 | 0.9483 |
| Listeria_monocytogenes_SLCC2479_882020                   | Listeria_monocytogenes_ATCC_19117_882095 | 0.9264 |
| Listeria_monocytogenes_SLCC2378_879088                   | Listeria_monocytogenes_ATCC_19117_882095 | 0.982  |
| Listeria_monocytogenes_SLCC2376_882097                   | Listeria_monocytogenes_ATCC_19117_882095 | 0.9417 |
| Listeria_monocytogenes_SLCC2372_932920                   | Listeria_monocytogenes_ATCC_19117_882095 | 0.9191 |
| Listeria_monocytogenes_serotype_4b_str_LL195_1230340     | Listeria_monocytogenes_ATCC_19117_882095 | 0.9773 |
| Listeria_monocytogenes_serotype_4b_str_LIS0087_1134669   | Listeria_monocytogenes_ATCC_19117_882095 | 0.9126 |
| Listeria_monocytogenes_serotype_4b_str_F2365_265669      | Listeria_monocytogenes_ATCC_19117_882095 | 0.9773 |
| Listeria_monocytogenes_serotype_4b_str_CLIP_80459_568819 | Listeria_monocytogenes_ATCC_19117_882095 | 0.9727 |
| Listeria_monocytogenes_serotype_4b_str_81-0861_1196161   | Listeria_monocytogenes_ATCC_19117_882095 | 0.9705 |
| Listeria_monocytogenes_serotype_4b_str_81-0592_1196160   | Listeria_monocytogenes_ATCC_19117_882095 | 0.9716 |
| Listeria_monocytogenes_serotype_4b_str_81-0558_1196159   | Listeria_monocytogenes_ATCC_19117_882095 | 0.9712 |
| Listeria_monocytogenes_serotype_4b_str_10-0809_1196162   | Listeria_monocytogenes_ATCC_19117_882095 | 0.9716 |
| Listeria_monocytogenes_serotype_4b_str_02-6680_1196175   | Listeria_monocytogenes_ATCC_19117_882095 | 0.9789 |



|                                                          |                                             |        |
|----------------------------------------------------------|---------------------------------------------|--------|
| Listeria_monocytogenes_serotype_4b_str_02-6679_1196174   | Listeria_monocytogenes_ATCC_19117_882095    | 0.9789 |
| Listeria_monocytogenes_serotype_4b_str_02-1792_1196173   | Listeria_monocytogenes_ATCC_19117_882095    | 0.9713 |
| Listeria_monocytogenes_serotype_4b_str_02-1289_1196172   | Listeria_monocytogenes_ATCC_19117_882095    | 0.9713 |
| Listeria_monocytogenes_serotype_4b_str_02-1103_1196171   | Listeria_monocytogenes_ATCC_19117_882095    | 0.9713 |
| Listeria_monocytogenes_serotype_3c_str_10-5027_1196195   | Listeria_monocytogenes_ATCC_19117_882095    | 0.9256 |
| Listeria_monocytogenes_serotype_1_2c_str_10-5026_1196194 | Listeria_monocytogenes_ATCC_19117_882095    | 0.9268 |
| Listeria_monocytogenes_serotype_1_2c_str_10-5025_1196193 | Listeria_monocytogenes_ATCC_19117_882095    | 0.9268 |
| Listeria_monocytogenes_serotype_1_2b_str_10-0811_1196164 | Listeria_monocytogenes_ATCC_19117_882095    | 0.9391 |
| Listeria_monocytogenes_serotype_1_2b_str_10-0810_1196163 | Listeria_monocytogenes_ATCC_19117_882095    | 0.9391 |
| Listeria_monocytogenes_serotype_1_2a_str_99-6370_1196179 | Listeria_monocytogenes_ATCC_19117_882095    | 0.9155 |
| Listeria_monocytogenes_serotype_1_2a_str_98-2035_1196178 | Listeria_monocytogenes_ATCC_19117_882095    | 0.9155 |
| Listeria_monocytogenes_serotype_1_2a_str_95-0093_1196177 | Listeria_monocytogenes_ATCC_19117_882095    | 0.9209 |
| Listeria_monocytogenes_serotype_1_2a_str_88-0478_1196176 | Listeria_monocytogenes_ATCC_19117_882095    | 0.9201 |
| Listeria_monocytogenes_serotype_1_2a_str_10-5024_1196192 | Listeria_monocytogenes_ATCC_19117_882095    | 0.9213 |
| Listeria_monocytogenes_serotype_1_2a_str_10-4758_1196168 | Listeria_monocytogenes_ATCC_19117_882095    | 0.9394 |
| Listeria_monocytogenes_serotype_1_2a_str_10-4754_1196167 | Listeria_monocytogenes_ATCC_19117_882095    | 0.9394 |
| Listeria_monocytogenes_serotype_1_2a_str_10-1321_1196191 | Listeria_monocytogenes_ATCC_19117_882095    | 0.9213 |
| Listeria_monocytogenes_serotype_1_2a_str_10-1047_1196190 | Listeria_monocytogenes_ATCC_19117_882095    | 0.9216 |
| Listeria_monocytogenes_serotype_1_2a_str_10-1046_1196189 | Listeria_monocytogenes_ATCC_19117_882095    | 0.9216 |
| Listeria_monocytogenes_serotype_1_2a_str_10-0934_1196170 | Listeria_monocytogenes_ATCC_19117_882095    | 0.9459 |
| Listeria_monocytogenes_serotype_1_2a_str_10-0933_1196169 | Listeria_monocytogenes_ATCC_19117_882095    | 0.9459 |
| Listeria_monocytogenes_serotype_1_2a_str_10-0815_1196188 | Listeria_monocytogenes_ATCC_19117_882095    | 0.9168 |
| Listeria_monocytogenes_serotype_1_2a_str_10-0814_1196187 | Listeria_monocytogenes_ATCC_19117_882095    | 0.9213 |
| Listeria_monocytogenes_serotype_1_2a_str_10-0813_1196166 | Listeria_monocytogenes_ATCC_19117_882095    | 0.9292 |
| Listeria_monocytogenes_serotype_1_2a_str_10-0812_1196165 | Listeria_monocytogenes_ATCC_19117_882095    | 0.9292 |
| Listeria_monocytogenes_serotype_1_2a_str_08-7669_1196186 | Listeria_monocytogenes_ATCC_19117_882095    | 0.9303 |
| Listeria_monocytogenes_serotype_1_2a_str_08-7374_1196185 | Listeria_monocytogenes_ATCC_19117_882095    | 0.9213 |
| Listeria_monocytogenes_serotype_1_2a_str_08-6997_1196184 | Listeria_monocytogenes_ATCC_19117_882095    | 0.9168 |
| Listeria_monocytogenes_serotype_1_2a_str_08-6569_1196183 | Listeria_monocytogenes_ATCC_19117_882095    | 0.9168 |
| Listeria_monocytogenes_serotype_1_2a_str_08-6056_1196182 | Listeria_monocytogenes_ATCC_19117_882095    | 0.9168 |
| Listeria_monocytogenes_serotype_1_2a_str_04-5457_1196181 | Listeria_monocytogenes_ATCC_19117_882095    | 0.9213 |
| Listeria_monocytogenes_serotype_1_2a_str_02-5993_1196180 | Listeria_monocytogenes_ATCC_19117_882095    | 0.9209 |
| Listeria_monocytogenes_R479a_1437838                     | Listeria_monocytogenes_ATCC_19117_882095    | 0.9202 |
| Listeria_monocytogenes_N53-1_1234142                     | Listeria_monocytogenes_ATCC_19117_882095    | 0.8918 |
| Listeria_monocytogenes_M7_1030009                        | Listeria_monocytogenes_ATCC_19117_882095    | 0.9064 |
| Listeria_monocytogenes_LO28_393132                       | Listeria_monocytogenes_ATCC_19117_882095    | 0.925  |
| Listeria_monocytogenes_L99_563174                        | Listeria_monocytogenes_ATCC_19117_882095    | 0.9071 |
| Listeria_monocytogenes_L312_882094                       | Listeria_monocytogenes_ATCC_19117_882095    | 0.973  |
| Listeria_monocytogenes_J1816_930781                      | Listeria_monocytogenes_ATCC_19117_882095    | 0.951  |
| Listeria_monocytogenes_J1-220_930782                     | Listeria_monocytogenes_ATCC_19117_882095    | 0.9786 |
| Listeria_monocytogenes_J0161_393130                      | Listeria_monocytogenes_ATCC_19117_882095    | 0.9284 |
| Listeria_monocytogenes_HCC23_552536                      | Listeria_monocytogenes_ATCC_19117_882095    | 0.9064 |
| Listeria_monocytogenes_FSL_R2-561_393126                 | Listeria_monocytogenes_ATCC_19117_882095    | 0.925  |
| Listeria_monocytogenes_FSL_J1-208_393119                 | Listeria_monocytogenes_ATCC_19117_882095    | 0.9213 |
| Listeria_monocytogenes_FSL_J1-175_393118                 | Listeria_monocytogenes_ATCC_19117_882095    | 0.9557 |
| Listeria_monocytogenes_Finland_1998_393127               | Listeria_monocytogenes_ATCC_19117_882095    | 0.9474 |
| Listeria_monocytogenes_EGD-e_169963_v1                   | Listeria_monocytogenes_ATCC_19117_882095    | 0.9349 |
| Listeria_monocytogenes_EGD-e_169963                      | Listeria_monocytogenes_ATCC_19117_882095    | 0.9353 |
| Listeria_monocytogenes_EGD_1334565                       | Listeria_monocytogenes_ATCC_19117_882095    | 0.937  |
| Listeria_monocytogenes_CFSAN002349_1299895               | Listeria_monocytogenes_ATCC_19117_882095    | 0.9724 |
| Listeria_monocytogenes_ATCC_19117_882095_v1              | Listeria_monocytogenes_ATCC_19117_882095    | 0.9996 |
| Listeria_monocytogenes_ATCC_19117_882095                 | Listeria_monocytogenes_ATCC_19117_882095    | 0.0698 |
| Listeria_welshimeri_1643                                 | Listeria_monocytogenes_ATCC_19117_882095_v1 | 0.8911 |
| Listeria_welshimeri_serovar_6b_str_SLCC5334_386043       | Listeria_monocytogenes_ATCC_19117_882095_v1 | 0.8907 |
| Listeria_seeligeri_serovar_1_2b_str_SLCC3954_683837      | Listeria_monocytogenes_ATCC_19117_882095_v1 | 0.8879 |
| Listeria_seeligeri_FSL_S4-171_702452                     | Listeria_monocytogenes_ATCC_19117_882095_v1 | 0.8283 |
| Listeria_seeligeri_FSL_N1-067_702453                     | Listeria_monocytogenes_ATCC_19117_882095_v1 | 0.8303 |
| Listeria_seeligeri_1640_v1                               | Listeria_monocytogenes_ATCC_19117_882095_v1 | 0.8948 |
| Listeria_seeligeri_1640                                  | Listeria_monocytogenes_ATCC_19117_882095_v1 | 0.8814 |
| Listeria_monocytogenes_WSLC1042_1457188                  | Listeria_monocytogenes_ATCC_19117_882095_v1 | 0.9809 |
| Listeria_monocytogenes_WSLC1001_1457187                  | Listeria_monocytogenes_ATCC_19117_882095_v1 | 0.932  |
| Listeria_monocytogenes_SLCC7179_879090                   | Listeria_monocytogenes_ATCC_19117_882095_v1 | 0.9387 |
| Listeria_monocytogenes_SLCC5850_882096                   | Listeria_monocytogenes_ATCC_19117_882095_v1 | 0.9363 |
| Listeria_monocytogenes_SLCC2755_932919                   | Listeria_monocytogenes_ATCC_19117_882095_v1 | 0.9451 |
| Listeria_monocytogenes_SLCC2540_879089                   | Listeria_monocytogenes_ATCC_19117_882095_v1 | 0.9483 |
| Listeria_monocytogenes_SLCC2479_882020                   | Listeria_monocytogenes_ATCC_19117_882095_v1 | 0.9268 |
| Listeria_monocytogenes_SLCC2378_879088                   | Listeria_monocytogenes_ATCC_19117_882095_v1 | 0.982  |
| Listeria_monocytogenes_SLCC2376_882097                   | Listeria_monocytogenes_ATCC_19117_882095_v1 | 0.942  |
| Listeria_monocytogenes_SLCC2372_932920                   | Listeria_monocytogenes_ATCC_19117_882095_v1 | 0.9195 |
| Listeria_monocytogenes_serotype_4b_str_LL195_1230340     | Listeria_monocytogenes_ATCC_19117_882095_v1 | 0.9773 |
| Listeria_monocytogenes_serotype_4b_str_LIS0087_1134669   | Listeria_monocytogenes_ATCC_19117_882095_v1 | 0.9129 |
| Listeria_monocytogenes_serotype_4b_str_F2365_265669      | Listeria_monocytogenes_ATCC_19117_882095_v1 | 0.9773 |
| Listeria_monocytogenes_serotype_4b_str_CLIP_80459_568819 | Listeria_monocytogenes_ATCC_19117_882095_v1 | 0.9727 |
| Listeria_monocytogenes_serotype_4b_str_81-0861_1196161   | Listeria_monocytogenes_ATCC_19117_882095_v1 | 0.9709 |
| Listeria_monocytogenes_serotype_4b_str_81-0592_1196160   | Listeria_monocytogenes_ATCC_19117_882095_v1 | 0.972  |
| Listeria_monocytogenes_serotype_4b_str_81-0558_1196159   | Listeria_monocytogenes_ATCC_19117_882095_v1 | 0.9713 |
| Listeria_monocytogenes_serotype_4b_str_10-0809_1196162   | Listeria_monocytogenes_ATCC_19117_882095_v1 | 0.972  |
| Listeria_monocytogenes_serotype_4b_str_02-6680_1196175   | Listeria_monocytogenes_ATCC_19117_882095_v1 | 0.9793 |
| Listeria_monocytogenes_serotype_4b_str_02-6679_1196174   | Listeria_monocytogenes_ATCC_19117_882095_v1 | 0.9793 |
| Listeria_monocytogenes_serotype_4b_str_02-1792_1196173   | Listeria_monocytogenes_ATCC_19117_882095_v1 | 0.9713 |
| Listeria_monocytogenes_serotype_4b_str_02-1289_1196172   | Listeria_monocytogenes_ATCC_19117_882095_v1 | 0.9713 |
| Listeria_monocytogenes_serotype_4b_str_02-1103_1196171   | Listeria_monocytogenes_ATCC_19117_882095_v1 | 0.9713 |
| Listeria_monocytogenes_serotype_3c_str_10-5027_1196195   | Listeria_monocytogenes_ATCC_19117_882095_v1 | 0.926  |
| Listeria_monocytogenes_serotype_1_2c_str_10-5026_1196194 | Listeria_monocytogenes_ATCC_19117_882095_v1 | 0.9268 |
| Listeria_monocytogenes_serotype_1_2c_str_10-5025_1196193 | Listeria_monocytogenes_ATCC_19117_882095_v1 | 0.9268 |
| Listeria_monocytogenes_serotype_1_2b_str_10-0811_1196164 | Listeria_monocytogenes_ATCC_19117_882095_v1 | 0.9395 |
| Listeria_monocytogenes_serotype_1_2b_str_10-0810_1196163 | Listeria_monocytogenes_ATCC_19117_882095_v1 | 0.9395 |
| Listeria_monocytogenes_serotype_1_2a_str_99-6370_1196179 | Listeria_monocytogenes_ATCC_19117_882095_v1 | 0.9158 |
| Listeria_monocytogenes_serotype_1_2a_str_98-2035_1196178 | Listeria_monocytogenes_ATCC_19117_882095_v1 | 0.9158 |
| Listeria_monocytogenes_serotype_1_2a_str_95-0093_1196177 | Listeria_monocytogenes_ATCC_19117_882095_v1 | 0.9213 |
| Listeria_monocytogenes_serotype_1_2a_str_88-0478_1196176 | Listeria_monocytogenes_ATCC_19117_882095_v1 | 0.9201 |



Listeria\_monocytogenes\_serotype\_1\_2a\_str\_10-5024\_1196192  
Listeria\_monocytogenes\_serotype\_1\_2a\_str\_10-4758\_1196168  
Listeria\_monocytogenes\_serotype\_1\_2a\_str\_10-4754\_1196167  
Listeria\_monocytogenes\_serotype\_1\_2a\_str\_10-1321\_1196191  
Listeria\_monocytogenes\_serotype\_1\_2a\_str\_10-1047\_1196190  
Listeria\_monocytogenes\_serotype\_1\_2a\_str\_10-1046\_1196189  
Listeria\_monocytogenes\_serotype\_1\_2a\_str\_10-0934\_1196170  
Listeria\_monocytogenes\_serotype\_1\_2a\_str\_10-0933\_1196169  
Listeria\_monocytogenes\_serotype\_1\_2a\_str\_10-0815\_1196188  
Listeria\_monocytogenes\_serotype\_1\_2a\_str\_10-0814\_1196187  
Listeria\_monocytogenes\_serotype\_1\_2a\_str\_10-0813\_1196166  
Listeria\_monocytogenes\_serotype\_1\_2a\_str\_10-0812\_1196165  
Listeria\_monocytogenes\_serotype\_1\_2a\_str\_08-7669\_1196186  
Listeria\_monocytogenes\_serotype\_1\_2a\_str\_08-7374\_1196185  
Listeria\_monocytogenes\_serotype\_1\_2a\_str\_08-6997\_1196184  
Listeria\_monocytogenes\_serotype\_1\_2a\_str\_08-6569\_1196183  
Listeria\_monocytogenes\_serotype\_1\_2a\_str\_08-6056\_1196182  
Listeria\_monocytogenes\_serotype\_1\_2a\_str\_04-5457\_1196181  
Listeria\_monocytogenes\_serotype\_1\_2a\_str\_02-5993\_1196180  
Listeria\_monocytogenes\_R479a\_1437838  
Listeria\_monocytogenes\_N53-1\_1234142  
Listeria\_monocytogenes\_M7\_1030009  
Listeria\_monocytogenes\_LO28\_393132  
Listeria\_monocytogenes\_L99\_563174  
Listeria\_monocytogenes\_L312\_882094  
Listeria\_monocytogenes\_J1816\_930781  
Listeria\_monocytogenes\_J1-220\_930782  
Listeria\_monocytogenes\_J0161\_393130  
Listeria\_monocytogenes\_HCC23\_552536  
Listeria\_monocytogenes\_FSL\_R2-561\_393126  
Listeria\_monocytogenes\_FSL\_J1-208\_393119  
Listeria\_monocytogenes\_FSL\_J1-175\_393118  
Listeria\_monocytogenes\_Finland\_1998\_393127  
Listeria\_monocytogenes\_EGD-e\_169963\_v1  
Listeria\_monocytogenes\_EGD-e\_169963  
Listeria\_monocytogenes\_EGD\_1334565  
Listeria\_monocytogenes\_CFSAN002349\_1299895  
Listeria\_monocytogenes\_ATCC\_19117\_882095\_v1  
Listeria\_welshimeri\_1643  
Listeria\_welshimeri\_serovar\_6b\_str\_SLCC5334\_386043  
Listeria\_seeligeri\_serovar\_1\_2b\_str\_SLCC3954\_683837  
Listeria\_seeligeri\_FSL\_S4-171\_702452  
Listeria\_seeligeri\_FSL\_N1-067\_702453  
Listeria\_seeligeri\_1640\_v1  
Listeria\_seeligeri\_1640  
Listeria\_monocytogenes\_WSLC1042\_1457188  
Listeria\_monocytogenes\_WSLC1001\_1457187  
Listeria\_monocytogenes\_SLCC7179\_879090  
Listeria\_monocytogenes\_SLCC5850\_882096  
Listeria\_monocytogenes\_SLCC2755\_932919  
Listeria\_monocytogenes\_SLCC2540\_879089  
Listeria\_monocytogenes\_SLCC2479\_882020  
Listeria\_monocytogenes\_SLCC2378\_879088  
Listeria\_monocytogenes\_SLCC2376\_882097  
Listeria\_monocytogenes\_SLCC2372\_932920  
Listeria\_monocytogenes\_serotype\_4b\_str\_LL195\_1230340  
Listeria\_monocytogenes\_serotype\_4b\_str\_LIS0087\_1134669  
Listeria\_monocytogenes\_serotype\_4b\_str\_F2365\_265669  
Listeria\_monocytogenes\_serotype\_4b\_str\_CLIP\_80459\_568819  
Listeria\_monocytogenes\_serotype\_4b\_str\_81-0861\_1196161  
Listeria\_monocytogenes\_serotype\_4b\_str\_81-0592\_1196160  
Listeria\_monocytogenes\_serotype\_4b\_str\_81-0558\_1196159  
Listeria\_monocytogenes\_serotype\_4b\_str\_10-0809\_1196162  
Listeria\_monocytogenes\_serotype\_4b\_str\_02-6680\_1196175  
Listeria\_monocytogenes\_serotype\_4b\_str\_02-6679\_1196174  
Listeria\_monocytogenes\_serotype\_4b\_str\_02-1792\_1196173  
Listeria\_monocytogenes\_serotype\_4b\_str\_02-1289\_1196172  
Listeria\_monocytogenes\_serotype\_4b\_str\_02-1103\_1196171  
Listeria\_monocytogenes\_serotype\_3c\_str\_10-5027\_1196195  
Listeria\_monocytogenes\_serotype\_1\_2c\_str\_10-5026\_1196194  
Listeria\_monocytogenes\_serotype\_1\_2c\_str\_10-5025\_1196193  
Listeria\_monocytogenes\_serotype\_1\_2b\_str\_10-0811\_1196164  
Listeria\_monocytogenes\_serotype\_1\_2b\_str\_10-0810\_1196163  
Listeria\_monocytogenes\_serotype\_1\_2a\_str\_99-6370\_1196179  
Listeria\_monocytogenes\_serotype\_1\_2a\_str\_98-2035\_1196178  
Listeria\_monocytogenes\_serotype\_1\_2a\_str\_95-0093\_1196177  
Listeria\_monocytogenes\_serotype\_1\_2a\_str\_88-0478\_1196176  
Listeria\_monocytogenes\_serotype\_1\_2a\_str\_10-5024\_1196192  
Listeria\_monocytogenes\_serotype\_1\_2a\_str\_10-4758\_1196168  
Listeria\_monocytogenes\_serotype\_1\_2a\_str\_10-4754\_1196167  
Listeria\_monocytogenes\_serotype\_1\_2a\_str\_10-1321\_1196191  
Listeria\_monocytogenes\_serotype\_1\_2a\_str\_10-1047\_1196190  
Listeria\_monocytogenes\_serotype\_1\_2a\_str\_10-1046\_1196189  
Listeria\_monocytogenes\_serotype\_1\_2a\_str\_10-0934\_1196170  
Listeria\_monocytogenes\_serotype\_1\_2a\_str\_10-0933\_1196169  
Listeria\_monocytogenes\_serotype\_1\_2a\_str\_10-0815\_1196188  
Listeria\_monocytogenes\_serotype\_1\_2a\_str\_10-0814\_1196187  
Listeria\_monocytogenes\_serotype\_1\_2a\_str\_10-0813\_1196166  
Listeria\_monocytogenes\_serotype\_1\_2a\_str\_10-0812\_1196165  
Listeria\_monocytogenes\_serotype\_1\_2a\_str\_08-7669\_1196186  
Listeria\_monocytogenes\_serotype\_1\_2a\_str\_08-7374\_1196185

[illegible]

0.9213  
0.9394  
0.9398  
0.9213  
0.922  
0.922  
0.9463  
0.9463  
0.9172  
0.9217  
0.9295  
0.9295  
0.9307  
0.9213  
0.9172  
0.9172  
0.9172  
0.9213  
0.9213  
0.9206  
0.8922  
0.9068  
0.9254  
0.9072  
0.9731  
0.9511  
0.979  
0.9284  
0.9064  
0.9254  
0.9217  
0.9561  
0.9478  
0.9353  
0.9357  
0.937  
0.9728  
0.0701  
0.8832  
0.8829  
0.8908  
0.8308  
0.8296  
0.8992  
0.8869  
0.9721  
0.9368  
0.9424  
0.9411  
0.9522  
0.9513  
0.9342  
0.9728  
0.9462  
0.9269  
0.9784  
0.9174  
0.9784  
0.9803  
0.9618  
0.9629  
0.9617  
0.9629  
0.9769  
0.9769  
0.9629  
0.9629  
0.9629  
0.9335  
0.9342  
0.9342  
0.9462  
0.9462  
0.9209  
0.9209  
0.9264  
0.9253  
0.9264  
0.9424  
0.9423  
0.9264  
0.9271  
0.9271  
0.9536  
0.9536  
0.9223  
0.9268  
0.9344  
0.9344  
0.9359  
0.9264

|                                                          |                                            |        |
|----------------------------------------------------------|--------------------------------------------|--------|
| Listeria_monocytogenes_serotype_1_2a_str_08-6997_1196184 | Listeria_monocytogenes_CFSAN002349_1299895 | 0.9223 |
| Listeria_monocytogenes_serotype_1_2a_str_08-6569_1196183 | Listeria_monocytogenes_CFSAN002349_1299895 | 0.9223 |
| Listeria_monocytogenes_serotype_1_2a_str_08-6056_1196182 | Listeria_monocytogenes_CFSAN002349_1299895 | 0.9223 |
| Listeria_monocytogenes_serotype_1_2a_str_04-5457_1196181 | Listeria_monocytogenes_CFSAN002349_1299895 | 0.9264 |
| Listeria_monocytogenes_serotype_1_2a_str_02-5993_1196180 | Listeria_monocytogenes_CFSAN002349_1299895 | 0.9264 |
| Listeria_monocytogenes_R479a_1437838                     | Listeria_monocytogenes_CFSAN002349_1299895 | 0.9261 |
| Listeria_monocytogenes_N53-1_1234142                     | Listeria_monocytogenes_CFSAN002349_1299895 | 0.8976 |
| Listeria_monocytogenes_M7_1030009                        | Listeria_monocytogenes_CFSAN002349_1299895 | 0.9093 |
| Listeria_monocytogenes_LO28_393132                       | Listeria_monocytogenes_CFSAN002349_1299895 | 0.9328 |
| Listeria_monocytogenes_L99_563174                        | Listeria_monocytogenes_CFSAN002349_1299895 | 0.9096 |
| Listeria_monocytogenes_L312_882094                       | Listeria_monocytogenes_CFSAN002349_1299895 | 0.9807 |
| Listeria_monocytogenes_J1816_930781                      | Listeria_monocytogenes_CFSAN002349_1299895 | 0.9619 |
| Listeria_monocytogenes_J1-220_930782                     | Listeria_monocytogenes_CFSAN002349_1299895 | 0.9523 |
| Listeria_monocytogenes_J0161_393130                      | Listeria_monocytogenes_CFSAN002349_1299895 | 0.9317 |
| Listeria_monocytogenes_HCC23_552536                      | Listeria_monocytogenes_CFSAN002349_1299895 | 0.9089 |
| Listeria_monocytogenes_FSL_R2-561_393126                 | Listeria_monocytogenes_CFSAN002349_1299895 | 0.9328 |
| Listeria_monocytogenes_FSL_J1-208_393119                 | Listeria_monocytogenes_CFSAN002349_1299895 | 0.9216 |
| Listeria_monocytogenes_FSL_J1-175_393118                 | Listeria_monocytogenes_CFSAN002349_1299895 | 0.9614 |
| Listeria_monocytogenes_Finland_1998_393127               | Listeria_monocytogenes_CFSAN002349_1299895 | 0.9539 |
| Listeria_monocytogenes_EGD-e_169963_v1                   | Listeria_monocytogenes_CFSAN002349_1299895 | 0.9424 |
| Listeria_monocytogenes_EGD-e_169963                      | Listeria_monocytogenes_CFSAN002349_1299895 | 0.9428 |
| Listeria_monocytogenes_EGD_1334565                       | Listeria_monocytogenes_CFSAN002349_1299895 | 0.9419 |
| Listeria_monocytogenes_CFSAN002349_1299895               | Listeria_monocytogenes_CFSAN002349_1299895 | 0.0684 |
| Listeria_welshimeri_1643                                 | Listeria_monocytogenes_EGD_1334565         | 0.8807 |
| Listeria_welshimeri_serovar_6b_str_SLCC5334_386043       | Listeria_monocytogenes_EGD_1334565         | 0.88   |
| Listeria_seeligeri_serovar_1_2b_str_SLCC3954_683837      | Listeria_monocytogenes_EGD_1334565         | 0.884  |
| Listeria_seeligeri_FSL_S4-171_702452                     | Listeria_monocytogenes_EGD_1334565         | 0.819  |
| Listeria_seeligeri_FSL_N1-067_702453                     | Listeria_monocytogenes_EGD_1334565         | 0.8343 |
| Listeria_seeligeri_1640_v1                               | Listeria_monocytogenes_EGD_1334565         | 0.8821 |
| Listeria_seeligeri_1640                                  | Listeria_monocytogenes_EGD_1334565         | 0.8772 |
| Listeria_monocytogenes_WSLC1042_1457188                  | Listeria_monocytogenes_EGD_1334565         | 0.9297 |
| Listeria_monocytogenes_WSLC1001_1457187                  | Listeria_monocytogenes_EGD_1334565         | 0.9936 |
| Listeria_monocytogenes_SLCC7179_879090                   | Listeria_monocytogenes_EGD_1334565         | 0.9595 |
| Listeria_monocytogenes_SLCC5850_882096                   | Listeria_monocytogenes_EGD_1334565         | 0.9989 |
| Listeria_monocytogenes_SLCC2755_932919                   | Listeria_monocytogenes_EGD_1334565         | 0.9347 |
| Listeria_monocytogenes_SLCC2540_879089                   | Listeria_monocytogenes_EGD_1334565         | 0.9481 |
| Listeria_monocytogenes_SLCC2479_882020                   | Listeria_monocytogenes_EGD_1334565         | 0.9552 |
| Listeria_monocytogenes_SLCC2378_879088                   | Listeria_monocytogenes_EGD_1334565         | 0.9311 |
| Listeria_monocytogenes_SLCC2376_882097                   | Listeria_monocytogenes_EGD_1334565         | 0.9434 |
| Listeria_monocytogenes_SLCC2372_932920                   | Listeria_monocytogenes_EGD_1334565         | 0.9478 |
| Listeria_monocytogenes_serotype_4b_str_LL195_1230340     | Listeria_monocytogenes_EGD_1334565         | 0.9371 |
| Listeria_monocytogenes_serotype_4b_str_LIS0087_1134669   | Listeria_monocytogenes_EGD_1334565         | 0.9643 |
| Listeria_monocytogenes_serotype_4b_str_F2365_265669      | Listeria_monocytogenes_EGD_1334565         | 0.9371 |
| Listeria_monocytogenes_serotype_4b_str_CLIP_80459_568819 | Listeria_monocytogenes_EGD_1334565         | 0.944  |
| Listeria_monocytogenes_serotype_4b_str_81-0861_1196161   | Listeria_monocytogenes_EGD_1334565         | 0.9224 |
| Listeria_monocytogenes_serotype_4b_str_81-0592_1196160   | Listeria_monocytogenes_EGD_1334565         | 0.9235 |
| Listeria_monocytogenes_serotype_4b_str_81-0558_1196159   | Listeria_monocytogenes_EGD_1334565         | 0.9246 |
| Listeria_monocytogenes_serotype_4b_str_10-0809_1196162   | Listeria_monocytogenes_EGD_1334565         | 0.9239 |
| Listeria_monocytogenes_serotype_4b_str_02-6680_1196175   | Listeria_monocytogenes_EGD_1334565         | 0.9422 |
| Listeria_monocytogenes_serotype_4b_str_02-6679_1196174   | Listeria_monocytogenes_EGD_1334565         | 0.9422 |
| Listeria_monocytogenes_serotype_4b_str_02-1792_1196173   | Listeria_monocytogenes_EGD_1334565         | 0.9239 |
| Listeria_monocytogenes_serotype_4b_str_02-1289_1196172   | Listeria_monocytogenes_EGD_1334565         | 0.9239 |
| Listeria_monocytogenes_serotype_4b_str_02-1103_1196171   | Listeria_monocytogenes_EGD_1334565         | 0.9239 |
| Listeria_monocytogenes_serotype_3c_str_10-5027_1196195   | Listeria_monocytogenes_EGD_1334565         | 0.9564 |
| Listeria_monocytogenes_serotype_1_2c_str_10-5026_1196194 | Listeria_monocytogenes_EGD_1334565         | 0.9571 |
| Listeria_monocytogenes_serotype_1_2c_str_10-5025_1196193 | Listeria_monocytogenes_EGD_1334565         | 0.9571 |
| Listeria_monocytogenes_serotype_1_2b_str_10-0811_1196164 | Listeria_monocytogenes_EGD_1334565         | 0.9397 |
| Listeria_monocytogenes_serotype_1_2b_str_10-0810_1196163 | Listeria_monocytogenes_EGD_1334565         | 0.9397 |
| Listeria_monocytogenes_serotype_1_2a_str_99-6370_1196179 | Listeria_monocytogenes_EGD_1334565         | 0.9477 |
| Listeria_monocytogenes_serotype_1_2a_str_98-2035_1196178 | Listeria_monocytogenes_EGD_1334565         | 0.9477 |
| Listeria_monocytogenes_serotype_1_2a_str_95-0093_1196177 | Listeria_monocytogenes_EGD_1334565         | 0.9522 |
| Listeria_monocytogenes_serotype_1_2a_str_88-0478_1196176 | Listeria_monocytogenes_EGD_1334565         | 0.9525 |
| Listeria_monocytogenes_serotype_1_2a_str_10-5024_1196192 | Listeria_monocytogenes_EGD_1334565         | 0.9529 |
| Listeria_monocytogenes_serotype_1_2a_str_10-4758_1196168 | Listeria_monocytogenes_EGD_1334565         | 0.9681 |
| Listeria_monocytogenes_serotype_1_2a_str_10-4754_1196167 | Listeria_monocytogenes_EGD_1334565         | 0.9681 |
| Listeria_monocytogenes_serotype_1_2a_str_10-1321_1196191 | Listeria_monocytogenes_EGD_1334565         | 0.9529 |
| Listeria_monocytogenes_serotype_1_2a_str_10-1047_1196190 | Listeria_monocytogenes_EGD_1334565         | 0.9533 |
| Listeria_monocytogenes_serotype_1_2a_str_10-1046_1196189 | Listeria_monocytogenes_EGD_1334565         | 0.9533 |
| Listeria_monocytogenes_serotype_1_2a_str_10-0934_1196170 | Listeria_monocytogenes_EGD_1334565         | 0.9734 |
| Listeria_monocytogenes_serotype_1_2a_str_10-0933_1196169 | Listeria_monocytogenes_EGD_1334565         | 0.9734 |
| Listeria_monocytogenes_serotype_1_2a_str_10-0815_1196188 | Listeria_monocytogenes_EGD_1334565         | 0.9487 |
| Listeria_monocytogenes_serotype_1_2a_str_10-0814_1196187 | Listeria_monocytogenes_EGD_1334565         | 0.9526 |
| Listeria_monocytogenes_serotype_1_2a_str_10-0813_1196166 | Listeria_monocytogenes_EGD_1334565         | 0.9792 |
| Listeria_monocytogenes_serotype_1_2a_str_10-0812_1196165 | Listeria_monocytogenes_EGD_1334565         | 0.9792 |
| Listeria_monocytogenes_serotype_1_2a_str_08-7669_1196186 | Listeria_monocytogenes_EGD_1334565         | 0.9509 |
| Listeria_monocytogenes_serotype_1_2a_str_08-7374_1196185 | Listeria_monocytogenes_EGD_1334565         | 0.9529 |
| Listeria_monocytogenes_serotype_1_2a_str_08-6997_1196184 | Listeria_monocytogenes_EGD_1334565         | 0.9487 |
| Listeria_monocytogenes_serotype_1_2a_str_08-6569_1196183 | Listeria_monocytogenes_EGD_1334565         | 0.9487 |
| Listeria_monocytogenes_serotype_1_2a_str_08-6056_1196182 | Listeria_monocytogenes_EGD_1334565         | 0.9487 |
| Listeria_monocytogenes_serotype_1_2a_str_04-5457_1196181 | Listeria_monocytogenes_EGD_1334565         | 0.9529 |
| Listeria_monocytogenes_serotype_1_2a_str_02-5993_1196180 | Listeria_monocytogenes_EGD_1334565         | 0.9526 |
| Listeria_monocytogenes_R479a_1437838                     | Listeria_monocytogenes_EGD_1334565         | 0.9504 |
| Listeria_monocytogenes_N53-1_1234142                     | Listeria_monocytogenes_EGD_1334565         | 0.9083 |
| Listeria_monocytogenes_M7_1030009                        | Listeria_monocytogenes_EGD_1334565         | 0.9135 |
| Listeria_monocytogenes_LO28_393132                       | Listeria_monocytogenes_EGD_1334565         | 0.9538 |
| Listeria_monocytogenes_L99_563174                        | Listeria_monocytogenes_EGD_1334565         | 0.9141 |
| Listeria_monocytogenes_L312_882094                       | Listeria_monocytogenes_EGD_1334565         | 0.944  |
| Listeria_monocytogenes_J1816_930781                      | Listeria_monocytogenes_EGD_1334565         | 0.9253 |
| Listeria_monocytogenes_J1-220_930782                     | Listeria_monocytogenes_EGD_1334565         | 0.9279 |
| Listeria_monocytogenes_J0161_393130                      | Listeria_monocytogenes_EGD_1334565         | 0.9455 |
| Listeria_monocytogenes_HCC23_552536                      | Listeria_monocytogenes_EGD_1334565         | 0.9133 |

|                                                          |                                        |        |
|----------------------------------------------------------|----------------------------------------|--------|
| Listeria_monocytogenes_FSL_R2-561_393126                 | Listeria_monocytogenes_EGD_1334565     | 0.9549 |
| Listeria_monocytogenes_FSL_J1-208_393119                 | Listeria_monocytogenes_EGD_1334565     | 0.9083 |
| Listeria_monocytogenes_FSL_J1-175_393118                 | Listeria_monocytogenes_EGD_1334565     | 0.9517 |
| Listeria_monocytogenes_Finland_1998_393127               | Listeria_monocytogenes_EGD_1334565     | 0.9615 |
| Listeria_monocytogenes_EGD-e_169963_v1                   | Listeria_monocytogenes_EGD_1334565     | 0.9537 |
| Listeria_monocytogenes_EGD-e_169963                      | Listeria_monocytogenes_EGD_1334565     | 0.9537 |
| Listeria_monocytogenes_EGD_1334565                       | Listeria_monocytogenes_EGD_1334565     | 0.0674 |
| Listeria_welshimeri_1643                                 | Listeria_monocytogenes_EGD-e_169963    | 0.875  |
| Listeria_welshimeri_serovar_6b_str_SLCC5334_386043       | Listeria_monocytogenes_EGD-e_169963    | 0.8746 |
| Listeria_seeligeri_serovar_1_2b_str_SLCC3954_683837      | Listeria_monocytogenes_EGD-e_169963    | 0.8832 |
| Listeria_seeligeri_FSL_S4-171_702452                     | Listeria_monocytogenes_EGD-e_169963    | 0.8224 |
| Listeria_seeligeri_FSL_N1-067_702453                     | Listeria_monocytogenes_EGD-e_169963    | 0.8306 |
| Listeria_seeligeri_1640_v1                               | Listeria_monocytogenes_EGD-e_169963    | 0.8828 |
| Listeria_seeligeri_1640                                  | Listeria_monocytogenes_EGD-e_169963    | 0.8836 |
| Listeria_monocytogenes_WSLC1042_1457188                  | Listeria_monocytogenes_EGD-e_169963    | 0.9344 |
| Listeria_monocytogenes_WSLC1001_1457187                  | Listeria_monocytogenes_EGD-e_169963    | 0.9505 |
| Listeria_monocytogenes_SLCC7179_879090                   | Listeria_monocytogenes_EGD-e_169963    | 0.9653 |
| Listeria_monocytogenes_SLCC5850_882096                   | Listeria_monocytogenes_EGD-e_169963    | 0.953  |
| Listeria_monocytogenes_SLCC2755_932919                   | Listeria_monocytogenes_EGD-e_169963    | 0.9308 |
| Listeria_monocytogenes_SLCC2540_879089                   | Listeria_monocytogenes_EGD-e_169963    | 0.94   |
| Listeria_monocytogenes_SLCC2479_882020                   | Listeria_monocytogenes_EGD-e_169963    | 0.9704 |
| Listeria_monocytogenes_SLCC2378_879088                   | Listeria_monocytogenes_EGD-e_169963    | 0.9355 |
| Listeria_monocytogenes_SLCC2376_882097                   | Listeria_monocytogenes_EGD-e_169963    | 0.9405 |
| Listeria_monocytogenes_SLCC2372_932920                   | Listeria_monocytogenes_EGD-e_169963    | 0.9628 |
| Listeria_monocytogenes_serotype_4b_str_LL195_1230340     | Listeria_monocytogenes_EGD-e_169963    | 0.9393 |
| Listeria_monocytogenes_serotype_4b_str_LIS0087_1134669   | Listeria_monocytogenes_EGD-e_169963    | 0.9418 |
| Listeria_monocytogenes_serotype_4b_str_F2365_265669      | Listeria_monocytogenes_EGD-e_169963    | 0.9393 |
| Listeria_monocytogenes_serotype_4b_str_CLIP_80459_568819 | Listeria_monocytogenes_EGD-e_169963    | 0.9419 |
| Listeria_monocytogenes_serotype_4b_str_81-0861_1196161   | Listeria_monocytogenes_EGD-e_169963    | 0.9377 |
| Listeria_monocytogenes_serotype_4b_str_81-0592_1196160   | Listeria_monocytogenes_EGD-e_169963    | 0.9388 |
| Listeria_monocytogenes_serotype_4b_str_81-0558_1196159   | Listeria_monocytogenes_EGD-e_169963    | 0.9391 |
| Listeria_monocytogenes_serotype_4b_str_10-0809_1196162   | Listeria_monocytogenes_EGD-e_169963    | 0.9388 |
| Listeria_monocytogenes_serotype_4b_str_02-6680_1196175   | Listeria_monocytogenes_EGD-e_169963    | 0.9389 |
| Listeria_monocytogenes_serotype_4b_str_02-6679_1196174   | Listeria_monocytogenes_EGD-e_169963    | 0.9389 |
| Listeria_monocytogenes_serotype_4b_str_02-1792_1196173   | Listeria_monocytogenes_EGD-e_169963    | 0.9403 |
| Listeria_monocytogenes_serotype_4b_str_02-1289_1196172   | Listeria_monocytogenes_EGD-e_169963    | 0.9403 |
| Listeria_monocytogenes_serotype_4b_str_02-1103_1196171   | Listeria_monocytogenes_EGD-e_169963    | 0.9403 |
| Listeria_monocytogenes_serotype_3c_str_10-5027_1196195   | Listeria_monocytogenes_EGD-e_169963    | 0.9681 |
| Listeria_monocytogenes_serotype_1_2c_str_10-5026_1196194 | Listeria_monocytogenes_EGD-e_169963    | 0.9689 |
| Listeria_monocytogenes_serotype_1_2c_str_10-5025_1196193 | Listeria_monocytogenes_EGD-e_169963    | 0.9689 |
| Listeria_monocytogenes_serotype_1_2b_str_10-0811_1196164 | Listeria_monocytogenes_EGD-e_169963    | 0.9429 |
| Listeria_monocytogenes_serotype_1_2b_str_10-0810_1196163 | Listeria_monocytogenes_EGD-e_169963    | 0.9429 |
| Listeria_monocytogenes_serotype_1_2a_str_99-6370_1196179 | Listeria_monocytogenes_EGD-e_169963    | 0.9386 |
| Listeria_monocytogenes_serotype_1_2a_str_98-2035_1196178 | Listeria_monocytogenes_EGD-e_169963    | 0.9386 |
| Listeria_monocytogenes_serotype_1_2a_str_95-0093_1196177 | Listeria_monocytogenes_EGD-e_169963    | 0.9434 |
| Listeria_monocytogenes_serotype_1_2a_str_88-0478_1196176 | Listeria_monocytogenes_EGD-e_169963    | 0.943  |
| Listeria_monocytogenes_serotype_1_2a_str_10-5024_1196192 | Listeria_monocytogenes_EGD-e_169963    | 0.9434 |
| Listeria_monocytogenes_serotype_1_2a_str_10-4758_1196168 | Listeria_monocytogenes_EGD-e_169963    | 0.9565 |
| Listeria_monocytogenes_serotype_1_2a_str_10-4754_1196167 | Listeria_monocytogenes_EGD-e_169963    | 0.9568 |
| Listeria_monocytogenes_serotype_1_2a_str_10-1321_1196191 | Listeria_monocytogenes_EGD-e_169963    | 0.9434 |
| Listeria_monocytogenes_serotype_1_2a_str_10-1047_1196190 | Listeria_monocytogenes_EGD-e_169963    | 0.9441 |
| Listeria_monocytogenes_serotype_1_2a_str_10-1046_1196189 | Listeria_monocytogenes_EGD-e_169963    | 0.9441 |
| Listeria_monocytogenes_serotype_1_2a_str_10-0934_1196170 | Listeria_monocytogenes_EGD-e_169963    | 0.9655 |
| Listeria_monocytogenes_serotype_1_2a_str_10-0933_1196169 | Listeria_monocytogenes_EGD-e_169963    | 0.9655 |
| Listeria_monocytogenes_serotype_1_2a_str_10-0815_1196188 | Listeria_monocytogenes_EGD-e_169963    | 0.9392 |
| Listeria_monocytogenes_serotype_1_2a_str_10-0814_1196187 | Listeria_monocytogenes_EGD-e_169963    | 0.9438 |
| Listeria_monocytogenes_serotype_1_2a_str_10-0813_1196166 | Listeria_monocytogenes_EGD-e_169963    | 0.9627 |
| Listeria_monocytogenes_serotype_1_2a_str_10-0812_1196165 | Listeria_monocytogenes_EGD-e_169963    | 0.9627 |
| Listeria_monocytogenes_serotype_1_2a_str_08-7669_1196186 | Listeria_monocytogenes_EGD-e_169963    | 0.9526 |
| Listeria_monocytogenes_serotype_1_2a_str_08-7374_1196185 | Listeria_monocytogenes_EGD-e_169963    | 0.9434 |
| Listeria_monocytogenes_serotype_1_2a_str_08-6997_1196184 | Listeria_monocytogenes_EGD-e_169963    | 0.9392 |
| Listeria_monocytogenes_serotype_1_2a_str_08-6569_1196183 | Listeria_monocytogenes_EGD-e_169963    | 0.9392 |
| Listeria_monocytogenes_serotype_1_2a_str_08-6056_1196182 | Listeria_monocytogenes_EGD-e_169963    | 0.9392 |
| Listeria_monocytogenes_serotype_1_2a_str_04-5457_1196181 | Listeria_monocytogenes_EGD-e_169963    | 0.9434 |
| Listeria_monocytogenes_serotype_1_2a_str_02-5993_1196180 | Listeria_monocytogenes_EGD-e_169963    | 0.9434 |
| Listeria_monocytogenes_R479a_1437838                     | Listeria_monocytogenes_EGD-e_169963    | 0.9393 |
| Listeria_monocytogenes_N53-1_1234142                     | Listeria_monocytogenes_EGD-e_169963    | 0.9207 |
| Listeria_monocytogenes_M7_1030009                        | Listeria_monocytogenes_EGD-e_169963    | 0.9145 |
| Listeria_monocytogenes_LO28_393132                       | Listeria_monocytogenes_EGD-e_169963    | 0.9749 |
| Listeria_monocytogenes_L99_563174                        | Listeria_monocytogenes_EGD-e_169963    | 0.9148 |
| Listeria_monocytogenes_L312_882094                       | Listeria_monocytogenes_EGD-e_169963    | 0.9419 |
| Listeria_monocytogenes_J1816_930781                      | Listeria_monocytogenes_EGD-e_169963    | 0.9278 |
| Listeria_monocytogenes_J1-220_930782                     | Listeria_monocytogenes_EGD-e_169963    | 0.9307 |
| Listeria_monocytogenes_J0161_393130                      | Listeria_monocytogenes_EGD-e_169963    | 0.9566 |
| Listeria_monocytogenes_HCC23_552536                      | Listeria_monocytogenes_EGD-e_169963    | 0.9145 |
| Listeria_monocytogenes_FSL_R2-561_393126                 | Listeria_monocytogenes_EGD-e_169963    | 0.9674 |
| Listeria_monocytogenes_FSL_J1-208_393119                 | Listeria_monocytogenes_EGD-e_169963    | 0.9066 |
| Listeria_monocytogenes_FSL_J1-175_393118                 | Listeria_monocytogenes_EGD-e_169963    | 0.9416 |
| Listeria_monocytogenes_Finland_1998_393127               | Listeria_monocytogenes_EGD-e_169963    | 0.9585 |
| Listeria_monocytogenes_EGD-e_169963_v1                   | Listeria_monocytogenes_EGD-e_169963    | 0.9996 |
| Listeria_monocytogenes_EGD-e_169963                      | Listeria_monocytogenes_EGD-e_169963    | 0.0681 |
| Listeria_welshimeri_1643                                 | Listeria_monocytogenes_EGD-e_169963_v1 | 0.8746 |
| Listeria_welshimeri_serovar_6b_str_SLCC5334_386043       | Listeria_monocytogenes_EGD-e_169963_v1 | 0.8742 |
| Listeria_seeligeri_serovar_1_2b_str_SLCC3954_683837      | Listeria_monocytogenes_EGD-e_169963_v1 | 0.8828 |
| Listeria_seeligeri_FSL_S4-171_702452                     | Listeria_monocytogenes_EGD-e_169963_v1 | 0.822  |
| Listeria_seeligeri_FSL_N1-067_702453                     | Listeria_monocytogenes_EGD-e_169963_v1 | 0.8302 |
| Listeria_seeligeri_1640_v1                               | Listeria_monocytogenes_EGD-e_169963_v1 | 0.8824 |
| Listeria_seeligeri_1640                                  | Listeria_monocytogenes_EGD-e_169963_v1 | 0.8833 |
| Listeria_monocytogenes_WSLC1042_1457188                  | Listeria_monocytogenes_EGD-e_169963_v1 | 0.9344 |
| Listeria_monocytogenes_WSLC1001_1457187                  | Listeria_monocytogenes_EGD-e_169963_v1 | 0.9505 |
| Listeria_monocytogenes_SLCC7179_879090                   | Listeria_monocytogenes_EGD-e_169963_v1 | 0.9653 |

Listeria\_monocytogenes\_SLCC5850\_882096  
Listeria\_monocytogenes\_SLCC2755\_932919  
Listeria\_monocytogenes\_SLCC2540\_879089  
Listeria\_monocytogenes\_SLCC2479\_882020  
Listeria\_monocytogenes\_SLCC2378\_879088  
Listeria\_monocytogenes\_SLCC2376\_882097  
Listeria\_monocytogenes\_SLCC2372\_932920  
Listeria\_monocytogenes\_serotype\_4b\_str\_LL195\_1230340  
Listeria\_monocytogenes\_serotype\_4b\_str\_LIS0087\_1134669  
Listeria\_monocytogenes\_serotype\_4b\_str\_F2365\_265669  
Listeria\_monocytogenes\_serotype\_4b\_str\_CLIP\_80459\_568819  
Listeria\_monocytogenes\_serotype\_4b\_str\_81-0861\_1196161  
Listeria\_monocytogenes\_serotype\_4b\_str\_81-0592\_1196160  
Listeria\_monocytogenes\_serotype\_4b\_str\_81-0558\_1196159  
Listeria\_monocytogenes\_serotype\_4b\_str\_10-0809\_1196162  
Listeria\_monocytogenes\_serotype\_4b\_str\_02-6680\_1196175  
Listeria\_monocytogenes\_serotype\_4b\_str\_02-6679\_1196174  
Listeria\_monocytogenes\_serotype\_4b\_str\_02-1792\_1196173  
Listeria\_monocytogenes\_serotype\_4b\_str\_02-1289\_1196172  
Listeria\_monocytogenes\_serotype\_4b\_str\_02-1103\_1196171  
Listeria\_monocytogenes\_serotype\_3c\_str\_10-5027\_1196195  
Listeria\_monocytogenes\_serotype\_1\_2c\_str\_10-5026\_1196194  
Listeria\_monocytogenes\_serotype\_1\_2c\_str\_10-5025\_1196193  
Listeria\_monocytogenes\_serotype\_1\_2b\_str\_10-0811\_1196164  
Listeria\_monocytogenes\_serotype\_1\_2b\_str\_10-0810\_1196163  
Listeria\_monocytogenes\_serotype\_1\_2a\_str\_99-6370\_1196179  
Listeria\_monocytogenes\_serotype\_1\_2a\_str\_98-2035\_1196178  
Listeria\_monocytogenes\_serotype\_1\_2a\_str\_95-0093\_1196177  
Listeria\_monocytogenes\_serotype\_1\_2a\_str\_88-0478\_1196176  
Listeria\_monocytogenes\_serotype\_1\_2a\_str\_10-5024\_1196192  
Listeria\_monocytogenes\_serotype\_1\_2a\_str\_10-4758\_1196168  
Listeria\_monocytogenes\_serotype\_1\_2a\_str\_10-4754\_1196167  
Listeria\_monocytogenes\_serotype\_1\_2a\_str\_10-1321\_1196191  
Listeria\_monocytogenes\_serotype\_1\_2a\_str\_10-1047\_1196190  
Listeria\_monocytogenes\_serotype\_1\_2a\_str\_10-1046\_1196189  
Listeria\_monocytogenes\_serotype\_1\_2a\_str\_10-0934\_1196170  
Listeria\_monocytogenes\_serotype\_1\_2a\_str\_10-0933\_1196169  
Listeria\_monocytogenes\_serotype\_1\_2a\_str\_10-0815\_1196188  
Listeria\_monocytogenes\_serotype\_1\_2a\_str\_10-0814\_1196187  
Listeria\_monocytogenes\_serotype\_1\_2a\_str\_10-0813\_1196166  
Listeria\_monocytogenes\_serotype\_1\_2a\_str\_10-0812\_1196165  
Listeria\_monocytogenes\_serotype\_1\_2a\_str\_08-7669\_1196186  
Listeria\_monocytogenes\_serotype\_1\_2a\_str\_08-7374\_1196185  
Listeria\_monocytogenes\_serotype\_1\_2a\_str\_08-6997\_1196184  
Listeria\_monocytogenes\_serotype\_1\_2a\_str\_08-6569\_1196183  
Listeria\_monocytogenes\_serotype\_1\_2a\_str\_08-6056\_1196182  
Listeria\_monocytogenes\_serotype\_1\_2a\_str\_04-5457\_1196181  
Listeria\_monocytogenes\_serotype\_1\_2a\_str\_02-5993\_1196180  
Listeria\_monocytogenes\_R479a\_1437838  
Listeria\_monocytogenes\_N53-1\_1234142  
Listeria\_monocytogenes\_M7\_1030009  
Listeria\_monocytogenes\_LO28\_393132  
Listeria\_monocytogenes\_L99\_563174  
Listeria\_monocytogenes\_L312\_882094  
Listeria\_monocytogenes\_J1816\_930781  
Listeria\_monocytogenes\_J1-220\_930782  
Listeria\_monocytogenes\_J0161\_393130  
Listeria\_monocytogenes\_HCC23\_552536  
Listeria\_monocytogenes\_FSL\_R2-561\_393126  
Listeria\_monocytogenes\_FSL\_J1-208\_393119  
Listeria\_monocytogenes\_FSL\_J1-175\_393118  
Listeria\_monocytogenes\_Finland\_1998\_393127  
Listeria\_monocytogenes\_EGD-e\_169963\_v1  
Listeria\_welshimeri\_1643  
Listeria\_welshimeri\_serovar\_6b\_str\_SLCC5334\_386043  
Listeria\_seeligeri\_serovar\_1\_2b\_str\_SLCC3954\_683837  
Listeria\_seeligeri\_FSL\_S4-171\_702452  
Listeria\_seeligeri\_FSL\_N1-067\_702453  
Listeria\_seeligeri\_1640\_v1  
Listeria\_seeligeri\_1640  
Listeria\_monocytogenes\_WSLC1042\_1457188  
Listeria\_monocytogenes\_WSLC1001\_1457187  
Listeria\_monocytogenes\_SLCC7179\_879090  
Listeria\_monocytogenes\_SLCC5850\_882096  
Listeria\_monocytogenes\_SLCC2755\_932919  
Listeria\_monocytogenes\_SLCC2540\_879089  
Listeria\_monocytogenes\_SLCC2479\_882020  
Listeria\_monocytogenes\_SLCC2378\_879088  
Listeria\_monocytogenes\_SLCC2376\_882097  
Listeria\_monocytogenes\_SLCC2372\_932920  
Listeria\_monocytogenes\_serotype\_4b\_str\_LL195\_1230340  
Listeria\_monocytogenes\_serotype\_4b\_str\_LIS0087\_1134669  
Listeria\_monocytogenes\_serotype\_4b\_str\_F2365\_265669  
Listeria\_monocytogenes\_serotype\_4b\_str\_CLIP\_80459\_568819  
Listeria\_monocytogenes\_serotype\_4b\_str\_81-0861\_1196161  
Listeria\_monocytogenes\_serotype\_4b\_str\_81-0592\_1196160  
Listeria\_monocytogenes\_serotype\_4b\_str\_81-0558\_1196159  
Listeria\_monocytogenes\_serotype\_4b\_str\_10-0809\_1196162  
Listeria\_monocytogenes\_serotype\_4b\_str\_02-6680\_1196175  
Listeria\_monocytogenes\_serotype\_4b\_str\_02-6679\_1196174  
Listeria\_monocytogenes\_serotype\_4b\_str\_02-1792\_1196173

Listeria\_monocytogenes\_EGD-e\_169963\_v1 0.953  
Listeria\_monocytogenes\_EGD-e\_169963\_v1 0.9304  
Listeria\_monocytogenes\_EGD-e\_169963\_v1 0.9396  
Listeria\_monocytogenes\_EGD-e\_169963\_v1 0.9704  
Listeria\_monocytogenes\_EGD-e\_169963\_v1 0.9351  
Listeria\_monocytogenes\_EGD-e\_169963\_v1 0.9405  
Listeria\_monocytogenes\_EGD-e\_169963\_v1 0.9628  
Listeria\_monocytogenes\_EGD-e\_169963\_v1 0.9389  
Listeria\_monocytogenes\_EGD-e\_169963\_v1 0.9414  
Listeria\_monocytogenes\_EGD-e\_169963\_v1 0.9389  
Listeria\_monocytogenes\_EGD-e\_169963\_v1 0.9415  
Listeria\_monocytogenes\_EGD-e\_169963\_v1 0.9373  
Listeria\_monocytogenes\_EGD-e\_169963\_v1 0.9384  
Listeria\_monocytogenes\_EGD-e\_169963\_v1 0.9387  
Listeria\_monocytogenes\_EGD-e\_169963\_v1 0.9384  
Listeria\_monocytogenes\_EGD-e\_169963\_v1 0.9385  
Listeria\_monocytogenes\_EGD-e\_169963\_v1 0.9385  
Listeria\_monocytogenes\_EGD-e\_169963\_v1 0.9399  
Listeria\_monocytogenes\_EGD-e\_169963\_v1 0.9399  
Listeria\_monocytogenes\_EGD-e\_169963\_v1 0.9399  
Listeria\_monocytogenes\_EGD-e\_169963\_v1 0.9681  
Listeria\_monocytogenes\_EGD-e\_169963\_v1 0.9689  
Listeria\_monocytogenes\_EGD-e\_169963\_v1 0.9689  
Listeria\_monocytogenes\_EGD-e\_169963\_v1 0.9425  
Listeria\_monocytogenes\_EGD-e\_169963\_v1 0.9425  
Listeria\_monocytogenes\_EGD-e\_169963\_v1 0.9382  
Listeria\_monocytogenes\_EGD-e\_169963\_v1 0.9382  
Listeria\_monocytogenes\_EGD-e\_169963\_v1 0.9434  
Listeria\_monocytogenes\_EGD-e\_169963\_v1 0.943  
Listeria\_monocytogenes\_EGD-e\_169963\_v1 0.9434  
Listeria\_monocytogenes\_EGD-e\_169963\_v1 0.9565  
Listeria\_monocytogenes\_EGD-e\_169963\_v1 0.9568  
Listeria\_monocytogenes\_EGD-e\_169963\_v1 0.9434  
Listeria\_monocytogenes\_EGD-e\_169963\_v1 0.9441  
Listeria\_monocytogenes\_EGD-e\_169963\_v1 0.9441  
Listeria\_monocytogenes\_EGD-e\_169963\_v1 0.9655  
Listeria\_monocytogenes\_EGD-e\_169963\_v1 0.9655  
Listeria\_monocytogenes\_EGD-e\_169963\_v1 0.9388  
Listeria\_monocytogenes\_EGD-e\_169963\_v1 0.9434  
Listeria\_monocytogenes\_EGD-e\_169963\_v1 0.9624  
Listeria\_monocytogenes\_EGD-e\_169963\_v1 0.9624  
Listeria\_monocytogenes\_EGD-e\_169963\_v1 0.9526  
Listeria\_monocytogenes\_EGD-e\_169963\_v1 0.9434  
Listeria\_monocytogenes\_EGD-e\_169963\_v1 0.9388  
Listeria\_monocytogenes\_EGD-e\_169963\_v1 0.9388  
Listeria\_monocytogenes\_EGD-e\_169963\_v1 0.9388  
Listeria\_monocytogenes\_EGD-e\_169963\_v1 0.9434  
Listeria\_monocytogenes\_EGD-e\_169963\_v1 0.9434  
Listeria\_monocytogenes\_EGD-e\_169963\_v1 0.9393  
Listeria\_monocytogenes\_EGD-e\_169963\_v1 0.921  
Listeria\_monocytogenes\_EGD-e\_169963\_v1 0.9141  
Listeria\_monocytogenes\_EGD-e\_169963\_v1 0.9749  
Listeria\_monocytogenes\_EGD-e\_169963\_v1 0.9144  
Listeria\_monocytogenes\_EGD-e\_169963\_v1 0.9415  
Listeria\_monocytogenes\_EGD-e\_169963\_v1 0.9274  
Listeria\_monocytogenes\_EGD-e\_169963\_v1 0.9303  
Listeria\_monocytogenes\_EGD-e\_169963\_v1 0.9566  
Listeria\_monocytogenes\_EGD-e\_169963\_v1 0.9141  
Listeria\_monocytogenes\_EGD-e\_169963\_v1 0.9674  
Listeria\_monocytogenes\_EGD-e\_169963\_v1 0.9066  
Listeria\_monocytogenes\_EGD-e\_169963\_v1 0.9412  
Listeria\_monocytogenes\_EGD-e\_169963\_v1 0.9585  
Listeria\_monocytogenes\_EGD-e\_169963\_v1 0.0685  
Listeria\_monocytogenes\_Finland\_1998\_393127 0.8797  
Listeria\_monocytogenes\_Finland\_1998\_393127 0.8793  
Listeria\_monocytogenes\_Finland\_1998\_393127 0.8967  
Listeria\_monocytogenes\_Finland\_1998\_393127 0.8248  
Listeria\_monocytogenes\_Finland\_1998\_393127 0.8385  
Listeria\_monocytogenes\_Finland\_1998\_393127 0.8939  
Listeria\_monocytogenes\_Finland\_1998\_393127 0.8857  
Listeria\_monocytogenes\_Finland\_1998\_393127 0.9415  
Listeria\_monocytogenes\_Finland\_1998\_393127 0.9559  
Listeria\_monocytogenes\_Finland\_1998\_393127 0.9687  
Listeria\_monocytogenes\_Finland\_1998\_393127 0.9607  
Listeria\_monocytogenes\_Finland\_1998\_393127 0.945  
Listeria\_monocytogenes\_Finland\_1998\_393127 0.9437  
Listeria\_monocytogenes\_Finland\_1998\_393127 0.9502  
Listeria\_monocytogenes\_Finland\_1998\_393127 0.9426  
Listeria\_monocytogenes\_Finland\_1998\_393127 0.9502  
Listeria\_monocytogenes\_Finland\_1998\_393127 0.943  
Listeria\_monocytogenes\_Finland\_1998\_393127 0.9484  
Listeria\_monocytogenes\_Finland\_1998\_393127 0.9367  
Listeria\_monocytogenes\_Finland\_1998\_393127 0.9484  
Listeria\_monocytogenes\_Finland\_1998\_393127 0.9542  
Listeria\_monocytogenes\_Finland\_1998\_393127 0.9314  
Listeria\_monocytogenes\_Finland\_1998\_393127 0.9325  
Listeria\_monocytogenes\_Finland\_1998\_393127 0.9333  
Listeria\_monocytogenes\_Finland\_1998\_393127 0.9329  
Listeria\_monocytogenes\_Finland\_1998\_393127 0.9543  
Listeria\_monocytogenes\_Finland\_1998\_393127 0.9543  
Listeria\_monocytogenes\_Finland\_1998\_393127 0.9329

|                                                          |                                            |        |
|----------------------------------------------------------|--------------------------------------------|--------|
| Listeria_monocytogenes_serotype_4b_str_02-1289_1196172   | Listeria_monocytogenes_Finland_1998_393127 | 0.9329 |
| Listeria_monocytogenes_serotype_4b_str_02-1103_1196171   | Listeria_monocytogenes_Finland_1998_393127 | 0.9329 |
| Listeria_monocytogenes_serotype_3c_str_10-5027_1196195   | Listeria_monocytogenes_Finland_1998_393127 | 0.9494 |
| Listeria_monocytogenes_serotype_1_2c_str_10-5026_1196194 | Listeria_monocytogenes_Finland_1998_393127 | 0.9502 |
| Listeria_monocytogenes_serotype_1_2c_str_10-5025_1196193 | Listeria_monocytogenes_Finland_1998_393127 | 0.9502 |
| Listeria_monocytogenes_serotype_1_2b_str_10-0811_1196164 | Listeria_monocytogenes_Finland_1998_393127 | 0.936  |
| Listeria_monocytogenes_serotype_1_2b_str_10-0810_1196163 | Listeria_monocytogenes_Finland_1998_393127 | 0.936  |
| Listeria_monocytogenes_serotype_1_2a_str_99-6370_1196179 | Listeria_monocytogenes_Finland_1998_393127 | 0.9437 |
| Listeria_monocytogenes_serotype_1_2a_str_98-2035_1196178 | Listeria_monocytogenes_Finland_1998_393127 | 0.9437 |
| Listeria_monocytogenes_serotype_1_2a_str_95-0093_1196177 | Listeria_monocytogenes_Finland_1998_393127 | 0.9497 |
| Listeria_monocytogenes_serotype_1_2a_str_88-0478_1196176 | Listeria_monocytogenes_Finland_1998_393127 | 0.9486 |
| Listeria_monocytogenes_serotype_1_2a_str_10-5024_1196192 | Listeria_monocytogenes_Finland_1998_393127 | 0.9497 |
| Listeria_monocytogenes_serotype_1_2a_str_10-4758_1196168 | Listeria_monocytogenes_Finland_1998_393127 | 0.9631 |
| Listeria_monocytogenes_serotype_1_2a_str_10-4754_1196167 | Listeria_monocytogenes_Finland_1998_393127 | 0.9635 |
| Listeria_monocytogenes_serotype_1_2a_str_10-1321_1196191 | Listeria_monocytogenes_Finland_1998_393127 | 0.9497 |
| Listeria_monocytogenes_serotype_1_2a_str_10-1047_1196190 | Listeria_monocytogenes_Finland_1998_393127 | 0.9505 |
| Listeria_monocytogenes_serotype_1_2a_str_10-1046_1196189 | Listeria_monocytogenes_Finland_1998_393127 | 0.9505 |
| Listeria_monocytogenes_serotype_1_2a_str_10-0934_1196170 | Listeria_monocytogenes_Finland_1998_393127 | 0.9723 |
| Listeria_monocytogenes_serotype_1_2a_str_10-0933_1196169 | Listeria_monocytogenes_Finland_1998_393127 | 0.9723 |
| Listeria_monocytogenes_serotype_1_2a_str_10-0815_1196188 | Listeria_monocytogenes_Finland_1998_393127 | 0.9451 |
| Listeria_monocytogenes_serotype_1_2a_str_10-0814_1196187 | Listeria_monocytogenes_Finland_1998_393127 | 0.9497 |
| Listeria_monocytogenes_serotype_1_2a_str_10-0813_1196166 | Listeria_monocytogenes_Finland_1998_393127 | 0.953  |
| Listeria_monocytogenes_serotype_1_2a_str_10-0812_1196165 | Listeria_monocytogenes_Finland_1998_393127 | 0.953  |
| Listeria_monocytogenes_serotype_1_2a_str_08-7669_1196186 | Listeria_monocytogenes_Finland_1998_393127 | 0.9599 |
| Listeria_monocytogenes_serotype_1_2a_str_08-7374_1196185 | Listeria_monocytogenes_Finland_1998_393127 | 0.9497 |
| Listeria_monocytogenes_serotype_1_2a_str_08-6997_1196184 | Listeria_monocytogenes_Finland_1998_393127 | 0.9451 |
| Listeria_monocytogenes_serotype_1_2a_str_08-6569_1196183 | Listeria_monocytogenes_Finland_1998_393127 | 0.9451 |
| Listeria_monocytogenes_serotype_1_2a_str_08-6056_1196182 | Listeria_monocytogenes_Finland_1998_393127 | 0.9451 |
| Listeria_monocytogenes_serotype_1_2a_str_04-5457_1196181 | Listeria_monocytogenes_Finland_1998_393127 | 0.9497 |
| Listeria_monocytogenes_serotype_1_2a_str_02-5993_1196180 | Listeria_monocytogenes_Finland_1998_393127 | 0.9497 |
| Listeria_monocytogenes_R479a_1437838                     | Listeria_monocytogenes_Finland_1998_393127 | 0.949  |
| Listeria_monocytogenes_N53-1_1234142                     | Listeria_monocytogenes_Finland_1998_393127 | 0.9165 |
| Listeria_monocytogenes_M7_1030009                        | Listeria_monocytogenes_Finland_1998_393127 | 0.9109 |
| Listeria_monocytogenes_LO28_393132                       | Listeria_monocytogenes_Finland_1998_393127 | 0.9487 |
| Listeria_monocytogenes_L99_563174                        | Listeria_monocytogenes_Finland_1998_393127 | 0.9113 |
| Listeria_monocytogenes_L312_882094                       | Listeria_monocytogenes_Finland_1998_393127 | 0.9542 |
| Listeria_monocytogenes_J1816_930781                      | Listeria_monocytogenes_Finland_1998_393127 | 0.9328 |
| Listeria_monocytogenes_J1-220_930782                     | Listeria_monocytogenes_Finland_1998_393127 | 0.9278 |
| Listeria_monocytogenes_J0161_393130                      | Listeria_monocytogenes_Finland_1998_393127 | 0.9574 |
| Listeria_monocytogenes_HCC23_552536                      | Listeria_monocytogenes_Finland_1998_393127 | 0.9109 |
| Listeria_monocytogenes_FSL_R2-561_393126                 | Listeria_monocytogenes_Finland_1998_393127 | 0.9491 |
| Listeria_monocytogenes_FSL_J1-208_393119                 | Listeria_monocytogenes_Finland_1998_393127 | 0.9126 |
| Listeria_monocytogenes_FSL_J1-175_393118                 | Listeria_monocytogenes_Finland_1998_393127 | 0.9465 |
| Listeria_monocytogenes_Finland_1998_393127               | Listeria_monocytogenes_Finland_1998_393127 | 0.0678 |
| Listeria_welshimeri_1643                                 | Listeria_monocytogenes_FSL_J1-175_393118   | 0.8792 |
| Listeria_welshimeri_serovar_6b_str_SLCC5334_386043       | Listeria_monocytogenes_FSL_J1-175_393118   | 0.8789 |
| Listeria_seeligeri_serovar_1_2b_str_SLCC3954_683837      | Listeria_monocytogenes_FSL_J1-175_393118   | 0.886  |
| Listeria_seeligeri_FSL_S4-171_702452                     | Listeria_monocytogenes_FSL_J1-175_393118   | 0.8238 |
| Listeria_seeligeri_FSL_N1-067_702453                     | Listeria_monocytogenes_FSL_J1-175_393118   | 0.8393 |
| Listeria_seeligeri_1640_v1                               | Listeria_monocytogenes_FSL_J1-175_393118   | 0.8909 |
| Listeria_seeligeri_1640                                  | Listeria_monocytogenes_FSL_J1-175_393118   | 0.8803 |
| Listeria_monocytogenes_WSLC1042_1457188                  | Listeria_monocytogenes_FSL_J1-175_393118   | 0.9525 |
| Listeria_monocytogenes_WSLC1001_1457187                  | Listeria_monocytogenes_FSL_J1-175_393118   | 0.9481 |
| Listeria_monocytogenes_SLCC7179_879090                   | Listeria_monocytogenes_FSL_J1-175_393118   | 0.9404 |
| Listeria_monocytogenes_SLCC5850_882096                   | Listeria_monocytogenes_FSL_J1-175_393118   | 0.951  |
| Listeria_monocytogenes_SLCC2755_932919                   | Listeria_monocytogenes_FSL_J1-175_393118   | 0.9502 |
| Listeria_monocytogenes_SLCC2540_879089                   | Listeria_monocytogenes_FSL_J1-175_393118   | 0.9682 |
| Listeria_monocytogenes_SLCC2479_882020                   | Listeria_monocytogenes_FSL_J1-175_393118   | 0.9432 |
| Listeria_monocytogenes_SLCC2378_879088                   | Listeria_monocytogenes_FSL_J1-175_393118   | 0.9536 |
| Listeria_monocytogenes_SLCC2376_882097                   | Listeria_monocytogenes_FSL_J1-175_393118   | 0.9365 |
| Listeria_monocytogenes_SLCC2372_932920                   | Listeria_monocytogenes_FSL_J1-175_393118   | 0.9358 |
| Listeria_monocytogenes_serotype_4b_str_LL195_1230340     | Listeria_monocytogenes_FSL_J1-175_393118   | 0.9586 |
| Listeria_monocytogenes_serotype_4b_str_LIS0087_1134669   | Listeria_monocytogenes_FSL_J1-175_393118   | 0.9271 |
| Listeria_monocytogenes_serotype_4b_str_F2365_265669      | Listeria_monocytogenes_FSL_J1-175_393118   | 0.9586 |
| Listeria_monocytogenes_serotype_4b_str_CLIP_80459_568819 | Listeria_monocytogenes_FSL_J1-175_393118   | 0.9567 |
| Listeria_monocytogenes_serotype_4b_str_81-0861_1196161   | Listeria_monocytogenes_FSL_J1-175_393118   | 0.9447 |
| Listeria_monocytogenes_serotype_4b_str_81-0592_1196160   | Listeria_monocytogenes_FSL_J1-175_393118   | 0.9458 |
| Listeria_monocytogenes_serotype_4b_str_81-0558_1196159   | Listeria_monocytogenes_FSL_J1-175_393118   | 0.9446 |
| Listeria_monocytogenes_serotype_4b_str_10-0809_1196162   | Listeria_monocytogenes_FSL_J1-175_393118   | 0.9458 |
| Listeria_monocytogenes_serotype_4b_str_02-6680_1196175   | Listeria_monocytogenes_FSL_J1-175_393118   | 0.9583 |
| Listeria_monocytogenes_serotype_4b_str_02-6679_1196174   | Listeria_monocytogenes_FSL_J1-175_393118   | 0.9583 |
| Listeria_monocytogenes_serotype_4b_str_02-1792_1196173   | Listeria_monocytogenes_FSL_J1-175_393118   | 0.9461 |
| Listeria_monocytogenes_serotype_4b_str_02-1289_1196172   | Listeria_monocytogenes_FSL_J1-175_393118   | 0.9461 |
| Listeria_monocytogenes_serotype_4b_str_02-1103_1196171   | Listeria_monocytogenes_FSL_J1-175_393118   | 0.9461 |
| Listeria_monocytogenes_serotype_3c_str_10-5027_1196195   | Listeria_monocytogenes_FSL_J1-175_393118   | 0.944  |
| Listeria_monocytogenes_serotype_1_2c_str_10-5026_1196194 | Listeria_monocytogenes_FSL_J1-175_393118   | 0.9444 |
| Listeria_monocytogenes_serotype_1_2c_str_10-5025_1196193 | Listeria_monocytogenes_FSL_J1-175_393118   | 0.9444 |
| Listeria_monocytogenes_serotype_1_2b_str_10-0811_1196164 | Listeria_monocytogenes_FSL_J1-175_393118   | 0.9558 |
| Listeria_monocytogenes_serotype_1_2b_str_10-0810_1196163 | Listeria_monocytogenes_FSL_J1-175_393118   | 0.9558 |
| Listeria_monocytogenes_serotype_1_2a_str_99-6370_1196179 | Listeria_monocytogenes_FSL_J1-175_393118   | 0.928  |
| Listeria_monocytogenes_serotype_1_2a_str_98-2035_1196178 | Listeria_monocytogenes_FSL_J1-175_393118   | 0.928  |
| Listeria_monocytogenes_serotype_1_2a_str_95-0093_1196177 | Listeria_monocytogenes_FSL_J1-175_393118   | 0.9328 |
| Listeria_monocytogenes_serotype_1_2a_str_88-0478_1196176 | Listeria_monocytogenes_FSL_J1-175_393118   | 0.9309 |
| Listeria_monocytogenes_serotype_1_2a_str_10-5024_1196192 | Listeria_monocytogenes_FSL_J1-175_393118   | 0.9328 |
| Listeria_monocytogenes_serotype_1_2a_str_10-4758_1196168 | Listeria_monocytogenes_FSL_J1-175_393118   | 0.9525 |
| Listeria_monocytogenes_serotype_1_2a_str_10-4754_1196167 | Listeria_monocytogenes_FSL_J1-175_393118   | 0.9529 |
| Listeria_monocytogenes_serotype_1_2a_str_10-1321_1196191 | Listeria_monocytogenes_FSL_J1-175_393118   | 0.9328 |
| Listeria_monocytogenes_serotype_1_2a_str_10-1047_1196190 | Listeria_monocytogenes_FSL_J1-175_393118   | 0.9327 |
| Listeria_monocytogenes_serotype_1_2a_str_10-1046_1196189 | Listeria_monocytogenes_FSL_J1-175_393118   | 0.9327 |
| Listeria_monocytogenes_serotype_1_2a_str_10-0934_1196170 | Listeria_monocytogenes_FSL_J1-175_393118   | 0.9492 |
| Listeria_monocytogenes_serotype_1_2a_str_10-0933_1196169 | Listeria_monocytogenes_FSL_J1-175_393118   | 0.9492 |



|                                                          |                                          |        |
|----------------------------------------------------------|------------------------------------------|--------|
| Listeria_monocytogenes_serotype_1_2a_str_10-0815_1196188 | Listeria_monocytogenes_FSL_J1-175_393118 | 0.9287 |
| Listeria_monocytogenes_serotype_1_2a_str_10-0814_1196187 | Listeria_monocytogenes_FSL_J1-175_393118 | 0.9332 |
| Listeria_monocytogenes_serotype_1_2a_str_10-0813_1196166 | Listeria_monocytogenes_FSL_J1-175_393118 | 0.9445 |
| Listeria_monocytogenes_serotype_1_2a_str_10-0812_1196165 | Listeria_monocytogenes_FSL_J1-175_393118 | 0.9445 |
| Listeria_monocytogenes_serotype_1_2a_str_08-7669_1196186 | Listeria_monocytogenes_FSL_J1-175_393118 | 0.9302 |
| Listeria_monocytogenes_serotype_1_2a_str_08-7374_1196185 | Listeria_monocytogenes_FSL_J1-175_393118 | 0.9328 |
| Listeria_monocytogenes_serotype_1_2a_str_08-6997_1196184 | Listeria_monocytogenes_FSL_J1-175_393118 | 0.9287 |
| Listeria_monocytogenes_serotype_1_2a_str_08-6569_1196183 | Listeria_monocytogenes_FSL_J1-175_393118 | 0.9287 |
| Listeria_monocytogenes_serotype_1_2a_str_08-6056_1196182 | Listeria_monocytogenes_FSL_J1-175_393118 | 0.9287 |
| Listeria_monocytogenes_serotype_1_2a_str_04-5457_1196181 | Listeria_monocytogenes_FSL_J1-175_393118 | 0.9328 |
| Listeria_monocytogenes_serotype_1_2a_str_02-5993_1196180 | Listeria_monocytogenes_FSL_J1-175_393118 | 0.9328 |
| Listeria_monocytogenes_R479a_1437838                     | Listeria_monocytogenes_FSL_J1-175_393118 | 0.931  |
| Listeria_monocytogenes_N53-1_1234142                     | Listeria_monocytogenes_FSL_J1-175_393118 | 0.8944 |
| Listeria_monocytogenes_M7_1030009                        | Listeria_monocytogenes_FSL_J1-175_393118 | 0.9116 |
| Listeria_monocytogenes_LO28_393132                       | Listeria_monocytogenes_FSL_J1-175_393118 | 0.9418 |
| Listeria_monocytogenes_L99_563174                        | Listeria_monocytogenes_FSL_J1-175_393118 | 0.912  |
| Listeria_monocytogenes_L312_882094                       | Listeria_monocytogenes_FSL_J1-175_393118 | 0.9571 |
| Listeria_monocytogenes_J1816_930781                      | Listeria_monocytogenes_FSL_J1-175_393118 | 0.9404 |
| Listeria_monocytogenes_J1-220_930782                     | Listeria_monocytogenes_FSL_J1-175_393118 | 0.9462 |
| Listeria_monocytogenes_J0161_393130                      | Listeria_monocytogenes_FSL_J1-175_393118 | 0.9358 |
| Listeria_monocytogenes_HCC23_552536                      | Listeria_monocytogenes_FSL_J1-175_393118 | 0.9116 |
| Listeria_monocytogenes_FSL_R2-561_393126                 | Listeria_monocytogenes_FSL_J1-175_393118 | 0.944  |
| Listeria_monocytogenes_FSL_J1-208_393119                 | Listeria_monocytogenes_FSL_J1-175_393118 | 0.9106 |
| Listeria_monocytogenes_FSL_J1-175_393118                 | Listeria_monocytogenes_FSL_J1-175_393118 | 0.0658 |
| Listeria_welshimeri_1643                                 | Listeria_monocytogenes_FSL_J1-208_393119 | 0.8845 |
| Listeria_welshimeri_serovar_6b_str_SLCC5334_386043       | Listeria_monocytogenes_FSL_J1-208_393119 | 0.8842 |
| Listeria_seeligeri_serovar_1_2b_str_SLCC3954_683837      | Listeria_monocytogenes_FSL_J1-208_393119 | 0.8743 |
| Listeria_seeligeri_FSL_S4-171_702452                     | Listeria_monocytogenes_FSL_J1-208_393119 | 0.8178 |
| Listeria_seeligeri_FSL_N1-067_702453                     | Listeria_monocytogenes_FSL_J1-208_393119 | 0.819  |
| Listeria_seeligeri_1640_v1                               | Listeria_monocytogenes_FSL_J1-208_393119 | 0.8809 |
| Listeria_seeligeri_1640                                  | Listeria_monocytogenes_FSL_J1-208_393119 | 0.8677 |
| Listeria_monocytogenes_WSLC1042_1457188                  | Listeria_monocytogenes_FSL_J1-208_393119 | 0.9186 |
| Listeria_monocytogenes_WSLC1001_1457187                  | Listeria_monocytogenes_FSL_J1-208_393119 | 0.9034 |
| Listeria_monocytogenes_SLCC7179_879090                   | Listeria_monocytogenes_FSL_J1-208_393119 | 0.909  |
| Listeria_monocytogenes_SLCC5850_882096                   | Listeria_monocytogenes_FSL_J1-208_393119 | 0.9075 |
| Listeria_monocytogenes_SLCC2755_932919                   | Listeria_monocytogenes_FSL_J1-208_393119 | 0.9023 |
| Listeria_monocytogenes_SLCC2540_879089                   | Listeria_monocytogenes_FSL_J1-208_393119 | 0.9056 |
| Listeria_monocytogenes_SLCC2479_882020                   | Listeria_monocytogenes_FSL_J1-208_393119 | 0.8977 |
| Listeria_monocytogenes_SLCC2378_879088                   | Listeria_monocytogenes_FSL_J1-208_393119 | 0.9196 |
| Listeria_monocytogenes_SLCC2376_882097                   | Listeria_monocytogenes_FSL_J1-208_393119 | 0.9263 |
| Listeria_monocytogenes_SLCC2372_932920                   | Listeria_monocytogenes_FSL_J1-208_393119 | 0.8914 |
| Listeria_monocytogenes_serotype_4b_str_LL195_1230340     | Listeria_monocytogenes_FSL_J1-208_393119 | 0.9245 |
| Listeria_monocytogenes_serotype_4b_str_LIS0087_1134669   | Listeria_monocytogenes_FSL_J1-208_393119 | 0.8836 |
| Listeria_monocytogenes_serotype_4b_str_F2365_265669      | Listeria_monocytogenes_FSL_J1-208_393119 | 0.9245 |
| Listeria_monocytogenes_serotype_4b_str_CLIP_80459_568819 | Listeria_monocytogenes_FSL_J1-208_393119 | 0.9225 |
| Listeria_monocytogenes_serotype_4b_str_81-0861_1196161   | Listeria_monocytogenes_FSL_J1-208_393119 | 0.9096 |
| Listeria_monocytogenes_serotype_4b_str_81-0592_1196160   | Listeria_monocytogenes_FSL_J1-208_393119 | 0.9107 |
| Listeria_monocytogenes_serotype_4b_str_81-0558_1196159   | Listeria_monocytogenes_FSL_J1-208_393119 | 0.911  |
| Listeria_monocytogenes_serotype_4b_str_10-0809_1196162   | Listeria_monocytogenes_FSL_J1-208_393119 | 0.9107 |
| Listeria_monocytogenes_serotype_4b_str_02-6680_1196175   | Listeria_monocytogenes_FSL_J1-208_393119 | 0.9253 |
| Listeria_monocytogenes_serotype_4b_str_02-6679_1196174   | Listeria_monocytogenes_FSL_J1-208_393119 | 0.9253 |
| Listeria_monocytogenes_serotype_4b_str_02-1792_1196173   | Listeria_monocytogenes_FSL_J1-208_393119 | 0.9103 |
| Listeria_monocytogenes_serotype_4b_str_02-1289_1196172   | Listeria_monocytogenes_FSL_J1-208_393119 | 0.9103 |
| Listeria_monocytogenes_serotype_4b_str_02-1103_1196171   | Listeria_monocytogenes_FSL_J1-208_393119 | 0.9103 |
| Listeria_monocytogenes_serotype_3c_str_10-5027_1196195   | Listeria_monocytogenes_FSL_J1-208_393119 | 0.8965 |
| Listeria_monocytogenes_serotype_1_2c_str_10-5026_1196194 | Listeria_monocytogenes_FSL_J1-208_393119 | 0.8973 |
| Listeria_monocytogenes_serotype_1_2c_str_10-5025_1196193 | Listeria_monocytogenes_FSL_J1-208_393119 | 0.8973 |
| Listeria_monocytogenes_serotype_1_2b_str_10-0811_1196164 | Listeria_monocytogenes_FSL_J1-208_393119 | 0.8955 |
| Listeria_monocytogenes_serotype_1_2b_str_10-0810_1196163 | Listeria_monocytogenes_FSL_J1-208_393119 | 0.8955 |
| Listeria_monocytogenes_serotype_1_2a_str_99-6370_1196179 | Listeria_monocytogenes_FSL_J1-208_393119 | 0.8834 |
| Listeria_monocytogenes_serotype_1_2a_str_98-2035_1196178 | Listeria_monocytogenes_FSL_J1-208_393119 | 0.8834 |
| Listeria_monocytogenes_serotype_1_2a_str_95-0093_1196177 | Listeria_monocytogenes_FSL_J1-208_393119 | 0.8886 |
| Listeria_monocytogenes_serotype_1_2a_str_88-0478_1196176 | Listeria_monocytogenes_FSL_J1-208_393119 | 0.8875 |
| Listeria_monocytogenes_serotype_1_2a_str_10-5024_1196192 | Listeria_monocytogenes_FSL_J1-208_393119 | 0.8886 |
| Listeria_monocytogenes_serotype_1_2a_str_10-4758_1196168 | Listeria_monocytogenes_FSL_J1-208_393119 | 0.9046 |
| Listeria_monocytogenes_serotype_1_2a_str_10-4754_1196167 | Listeria_monocytogenes_FSL_J1-208_393119 | 0.905  |
| Listeria_monocytogenes_serotype_1_2a_str_10-1321_1196191 | Listeria_monocytogenes_FSL_J1-208_393119 | 0.8886 |
| Listeria_monocytogenes_serotype_1_2a_str_10-1047_1196190 | Listeria_monocytogenes_FSL_J1-208_393119 | 0.8893 |
| Listeria_monocytogenes_serotype_1_2a_str_10-1046_1196189 | Listeria_monocytogenes_FSL_J1-208_393119 | 0.8893 |
| Listeria_monocytogenes_serotype_1_2a_str_10-0934_1196170 | Listeria_monocytogenes_FSL_J1-208_393119 | 0.9184 |
| Listeria_monocytogenes_serotype_1_2a_str_10-0933_1196169 | Listeria_monocytogenes_FSL_J1-208_393119 | 0.9184 |
| Listeria_monocytogenes_serotype_1_2a_str_10-0815_1196188 | Listeria_monocytogenes_FSL_J1-208_393119 | 0.8847 |
| Listeria_monocytogenes_serotype_1_2a_str_10-0814_1196187 | Listeria_monocytogenes_FSL_J1-208_393119 | 0.8886 |
| Listeria_monocytogenes_serotype_1_2a_str_10-0813_1196166 | Listeria_monocytogenes_FSL_J1-208_393119 | 0.9014 |
| Listeria_monocytogenes_serotype_1_2a_str_10-0812_1196165 | Listeria_monocytogenes_FSL_J1-208_393119 | 0.9014 |
| Listeria_monocytogenes_serotype_1_2a_str_08-7669_1196186 | Listeria_monocytogenes_FSL_J1-208_393119 | 0.898  |
| Listeria_monocytogenes_serotype_1_2a_str_08-7374_1196185 | Listeria_monocytogenes_FSL_J1-208_393119 | 0.8886 |
| Listeria_monocytogenes_serotype_1_2a_str_08-6997_1196184 | Listeria_monocytogenes_FSL_J1-208_393119 | 0.8847 |
| Listeria_monocytogenes_serotype_1_2a_str_08-6569_1196183 | Listeria_monocytogenes_FSL_J1-208_393119 | 0.8847 |
| Listeria_monocytogenes_serotype_1_2a_str_08-6056_1196182 | Listeria_monocytogenes_FSL_J1-208_393119 | 0.8847 |
| Listeria_monocytogenes_serotype_1_2a_str_04-5457_1196181 | Listeria_monocytogenes_FSL_J1-208_393119 | 0.8886 |
| Listeria_monocytogenes_serotype_1_2a_str_02-5993_1196180 | Listeria_monocytogenes_FSL_J1-208_393119 | 0.8886 |
| Listeria_monocytogenes_R479a_1437838                     | Listeria_monocytogenes_FSL_J1-208_393119 | 0.8883 |
| Listeria_monocytogenes_N53-1_1234142                     | Listeria_monocytogenes_FSL_J1-208_393119 | 0.8657 |
| Listeria_monocytogenes_M7_1030009                        | Listeria_monocytogenes_FSL_J1-208_393119 | 0.897  |
| Listeria_monocytogenes_LO28_393132                       | Listeria_monocytogenes_FSL_J1-208_393119 | 0.8959 |
| Listeria_monocytogenes_L99_563174                        | Listeria_monocytogenes_FSL_J1-208_393119 | 0.8973 |
| Listeria_monocytogenes_L312_882094                       | Listeria_monocytogenes_FSL_J1-208_393119 | 0.9229 |
| Listeria_monocytogenes_J1816_930781                      | Listeria_monocytogenes_FSL_J1-208_393119 | 0.9009 |
| Listeria_monocytogenes_J1-220_930782                     | Listeria_monocytogenes_FSL_J1-208_393119 | 0.9039 |
| Listeria_monocytogenes_J0161_393130                      | Listeria_monocytogenes_FSL_J1-208_393119 | 0.8978 |



Listeria\_monocytogenes\_HCC23\_552536  
Listeria\_monocytogenes\_FSL\_R2-561\_393126  
Listeria\_monocytogenes\_FSL\_J1-208\_393119  
Listeria\_welshimeri\_1643  
Listeria\_welshimeri\_serovar\_6b\_str\_SLCC5334\_386043  
Listeria\_seeligeri\_serovar\_1\_2b\_str\_SLCC3954\_683837  
Listeria\_seeligeri\_FSL\_S4-171\_702452  
Listeria\_seeligeri\_FSL\_N1-067\_702453  
Listeria\_seeligeri\_1640\_v1  
Listeria\_seeligeri\_1640  
Listeria\_monocytogenes\_WSLC1042\_1457188  
Listeria\_monocytogenes\_WSLC1001\_1457187  
Listeria\_monocytogenes\_SLCC7179\_879090  
Listeria\_monocytogenes\_SLCC5850\_882096  
Listeria\_monocytogenes\_SLCC2755\_932919  
Listeria\_monocytogenes\_SLCC2540\_879089  
Listeria\_monocytogenes\_SLCC2479\_882020  
Listeria\_monocytogenes\_SLCC2378\_879088  
Listeria\_monocytogenes\_SLCC2376\_882097  
Listeria\_monocytogenes\_SLCC2372\_932920  
Listeria\_monocytogenes\_serotype\_4b\_str\_LL195\_1230340  
Listeria\_monocytogenes\_serotype\_4b\_str\_LIS0087\_1134669  
Listeria\_monocytogenes\_serotype\_4b\_str\_F2365\_265669  
Listeria\_monocytogenes\_serotype\_4b\_str\_CLIP\_80459\_568819  
Listeria\_monocytogenes\_serotype\_4b\_str\_81-0861\_1196161  
Listeria\_monocytogenes\_serotype\_4b\_str\_81-0592\_1196160  
Listeria\_monocytogenes\_serotype\_4b\_str\_81-0558\_1196159  
Listeria\_monocytogenes\_serotype\_4b\_str\_10-0809\_1196162  
Listeria\_monocytogenes\_serotype\_4b\_str\_02-6680\_1196175  
Listeria\_monocytogenes\_serotype\_4b\_str\_02-6679\_1196174  
Listeria\_monocytogenes\_serotype\_4b\_str\_02-1792\_1196173  
Listeria\_monocytogenes\_serotype\_4b\_str\_02-1289\_1196172  
Listeria\_monocytogenes\_serotype\_4b\_str\_02-1103\_1196171  
Listeria\_monocytogenes\_serotype\_3c\_str\_10-5027\_1196195  
Listeria\_monocytogenes\_serotype\_1\_2c\_str\_10-5026\_1196194  
Listeria\_monocytogenes\_serotype\_1\_2c\_str\_10-5025\_1196193  
Listeria\_monocytogenes\_serotype\_1\_2b\_str\_10-0811\_1196164  
Listeria\_monocytogenes\_serotype\_1\_2b\_str\_10-0810\_1196163  
Listeria\_monocytogenes\_serotype\_1\_2a\_str\_99-6370\_1196179  
Listeria\_monocytogenes\_serotype\_1\_2a\_str\_98-2035\_1196178  
Listeria\_monocytogenes\_serotype\_1\_2a\_str\_95-0093\_1196177  
Listeria\_monocytogenes\_serotype\_1\_2a\_str\_88-0478\_1196176  
Listeria\_monocytogenes\_serotype\_1\_2a\_str\_10-5024\_1196192  
Listeria\_monocytogenes\_serotype\_1\_2a\_str\_10-4758\_1196168  
Listeria\_monocytogenes\_serotype\_1\_2a\_str\_10-4754\_1196167  
Listeria\_monocytogenes\_serotype\_1\_2a\_str\_10-1321\_1196191  
Listeria\_monocytogenes\_serotype\_1\_2a\_str\_10-1047\_1196190  
Listeria\_monocytogenes\_serotype\_1\_2a\_str\_10-1046\_1196189  
Listeria\_monocytogenes\_serotype\_1\_2a\_str\_10-0934\_1196170  
Listeria\_monocytogenes\_serotype\_1\_2a\_str\_10-0933\_1196169  
Listeria\_monocytogenes\_serotype\_1\_2a\_str\_10-0815\_1196188  
Listeria\_monocytogenes\_serotype\_1\_2a\_str\_10-0814\_1196187  
Listeria\_monocytogenes\_serotype\_1\_2a\_str\_10-0813\_1196166  
Listeria\_monocytogenes\_serotype\_1\_2a\_str\_10-0812\_1196165  
Listeria\_monocytogenes\_serotype\_1\_2a\_str\_08-7669\_1196186  
Listeria\_monocytogenes\_serotype\_1\_2a\_str\_08-7374\_1196185  
Listeria\_monocytogenes\_serotype\_1\_2a\_str\_08-6997\_1196184  
Listeria\_monocytogenes\_serotype\_1\_2a\_str\_08-6569\_1196183  
Listeria\_monocytogenes\_serotype\_1\_2a\_str\_08-6056\_1196182  
Listeria\_monocytogenes\_serotype\_1\_2a\_str\_04-5457\_1196181  
Listeria\_monocytogenes\_serotype\_1\_2a\_str\_02-5993\_1196180  
Listeria\_monocytogenes\_R479a\_1437838  
Listeria\_monocytogenes\_N53-1\_1234142  
Listeria\_monocytogenes\_M7\_1030009  
Listeria\_monocytogenes\_LO28\_393132  
Listeria\_monocytogenes\_L99\_563174  
Listeria\_monocytogenes\_L312\_882094  
Listeria\_monocytogenes\_J1816\_930781  
Listeria\_monocytogenes\_J1-220\_930782  
Listeria\_monocytogenes\_J0161\_393130  
Listeria\_monocytogenes\_HCC23\_552536  
Listeria\_monocytogenes\_FSL\_R2-561\_393126  
Listeria\_welshimeri\_1643  
Listeria\_welshimeri\_serovar\_6b\_str\_SLCC5334\_386043  
Listeria\_seeligeri\_serovar\_1\_2b\_str\_SLCC3954\_683837  
Listeria\_seeligeri\_FSL\_S4-171\_702452  
Listeria\_seeligeri\_FSL\_N1-067\_702453  
Listeria\_seeligeri\_1640\_v1  
Listeria\_seeligeri\_1640  
Listeria\_monocytogenes\_WSLC1042\_1457188  
Listeria\_monocytogenes\_WSLC1001\_1457187  
Listeria\_monocytogenes\_SLCC7179\_879090  
Listeria\_monocytogenes\_SLCC5850\_882096  
Listeria\_monocytogenes\_SLCC2755\_932919  
Listeria\_monocytogenes\_SLCC2540\_879089  
Listeria\_monocytogenes\_SLCC2479\_882020  
Listeria\_monocytogenes\_SLCC2378\_879088  
Listeria\_monocytogenes\_SLCC2376\_882097  
Listeria\_monocytogenes\_SLCC2372\_932920  
Listeria\_monocytogenes\_serotype\_4b\_str\_LL195\_1230340  
Listeria\_monocytogenes\_serotype\_4b\_str\_LIS0087\_1134669

Listeria\_monocytogenes\_FSL\_J1-208\_393119 0.897  
Listeria\_monocytogenes\_FSL\_J1-208\_393119 0.8963  
Listeria\_monocytogenes\_FSL\_J1-208\_393119 0.0541  
Listeria\_monocytogenes\_FSL\_R2-561\_393126 0.8682  
Listeria\_monocytogenes\_FSL\_R2-561\_393126 0.8679  
Listeria\_monocytogenes\_FSL\_R2-561\_393126 0.874  
Listeria\_monocytogenes\_FSL\_R2-561\_393126 0.816  
Listeria\_monocytogenes\_FSL\_R2-561\_393126 0.8405  
Listeria\_monocytogenes\_FSL\_R2-561\_393126 0.8771  
Listeria\_monocytogenes\_FSL\_R2-561\_393126 0.8702  
Listeria\_monocytogenes\_FSL\_R2-561\_393126 0.9242  
Listeria\_monocytogenes\_FSL\_R2-561\_393126 0.9533  
Listeria\_monocytogenes\_FSL\_R2-561\_393126 0.9468  
Listeria\_monocytogenes\_FSL\_R2-561\_393126 0.9542  
Listeria\_monocytogenes\_FSL\_R2-561\_393126 0.9214  
Listeria\_monocytogenes\_FSL\_R2-561\_393126 0.9435  
Listeria\_monocytogenes\_FSL\_R2-561\_393126 0.9866  
Listeria\_monocytogenes\_FSL\_R2-561\_393126 0.9252  
Listeria\_monocytogenes\_FSL\_R2-561\_393126 0.9308  
Listeria\_monocytogenes\_FSL\_R2-561\_393126 0.9786  
Listeria\_monocytogenes\_FSL\_R2-561\_393126 0.9297  
Listeria\_monocytogenes\_FSL\_R2-561\_393126 0.9329  
Listeria\_monocytogenes\_FSL\_R2-561\_393126 0.9297  
Listeria\_monocytogenes\_FSL\_R2-561\_393126 0.9322  
Listeria\_monocytogenes\_FSL\_R2-561\_393126 0.919  
Listeria\_monocytogenes\_FSL\_R2-561\_393126 0.92  
Listeria\_monocytogenes\_FSL\_R2-561\_393126 0.9204  
Listeria\_monocytogenes\_FSL\_R2-561\_393126 0.92  
Listeria\_monocytogenes\_FSL\_R2-561\_393126 0.9293  
Listeria\_monocytogenes\_FSL\_R2-561\_393126 0.9293  
Listeria\_monocytogenes\_FSL\_R2-561\_393126 0.9215  
Listeria\_monocytogenes\_FSL\_R2-561\_393126 0.9215  
Listeria\_monocytogenes\_FSL\_R2-561\_393126 0.9215  
Listeria\_monocytogenes\_FSL\_R2-561\_393126 0.9881  
Listeria\_monocytogenes\_FSL\_R2-561\_393126 0.9885  
Listeria\_monocytogenes\_FSL\_R2-561\_393126 0.9885  
Listeria\_monocytogenes\_FSL\_R2-561\_393126 0.939  
Listeria\_monocytogenes\_FSL\_R2-561\_393126 0.939  
Listeria\_monocytogenes\_FSL\_R2-561\_393126 0.9461  
Listeria\_monocytogenes\_FSL\_R2-561\_393126 0.9461  
Listeria\_monocytogenes\_FSL\_R2-561\_393126 0.9509  
Listeria\_monocytogenes\_FSL\_R2-561\_393126 0.9502  
Listeria\_monocytogenes\_FSL\_R2-561\_393126 0.9513  
Listeria\_monocytogenes\_FSL\_R2-561\_393126 0.9576  
Listeria\_monocytogenes\_FSL\_R2-561\_393126 0.958  
Listeria\_monocytogenes\_FSL\_R2-561\_393126 0.9513  
Listeria\_monocytogenes\_FSL\_R2-561\_393126 0.9505  
Listeria\_monocytogenes\_FSL\_R2-561\_393126 0.9505  
Listeria\_monocytogenes\_FSL\_R2-561\_393126 0.9548  
Listeria\_monocytogenes\_FSL\_R2-561\_393126 0.9548  
Listeria\_monocytogenes\_FSL\_R2-561\_393126 0.9471  
Listeria\_monocytogenes\_FSL\_R2-561\_393126 0.9513  
Listeria\_monocytogenes\_FSL\_R2-561\_393126 0.9534  
Listeria\_monocytogenes\_FSL\_R2-561\_393126 0.9534  
Listeria\_monocytogenes\_FSL\_R2-561\_393126 0.9456  
Listeria\_monocytogenes\_FSL\_R2-561\_393126 0.9513  
Listeria\_monocytogenes\_FSL\_R2-561\_393126 0.9471  
Listeria\_monocytogenes\_FSL\_R2-561\_393126 0.9471  
Listeria\_monocytogenes\_FSL\_R2-561\_393126 0.9471  
Listeria\_monocytogenes\_FSL\_R2-561\_393126 0.9513  
Listeria\_monocytogenes\_FSL\_R2-561\_393126 0.9513  
Listeria\_monocytogenes\_FSL\_R2-561\_393126 0.9532  
Listeria\_monocytogenes\_FSL\_R2-561\_393126 0.9047  
Listeria\_monocytogenes\_FSL\_R2-561\_393126 0.9076  
Listeria\_monocytogenes\_FSL\_R2-561\_393126 0.98  
Listeria\_monocytogenes\_FSL\_R2-561\_393126 0.9079  
Listeria\_monocytogenes\_FSL\_R2-561\_393126 0.9322  
Listeria\_monocytogenes\_FSL\_R2-561\_393126 0.9222  
Listeria\_monocytogenes\_FSL\_R2-561\_393126 0.9232  
Listeria\_monocytogenes\_FSL\_R2-561\_393126 0.9422  
Listeria\_monocytogenes\_FSL\_R2-561\_393126 0.9076  
Listeria\_monocytogenes\_FSL\_R2-561\_393126 0.0716  
Listeria\_monocytogenes\_HCC23\_552536 0.8654  
Listeria\_monocytogenes\_HCC23\_552536 0.8647  
Listeria\_monocytogenes\_HCC23\_552536 0.8575  
Listeria\_monocytogenes\_HCC23\_552536 0.808  
Listeria\_monocytogenes\_HCC23\_552536 0.8103  
Listeria\_monocytogenes\_HCC23\_552536 0.8524  
Listeria\_monocytogenes\_HCC23\_552536 0.8655  
Listeria\_monocytogenes\_HCC23\_552536 0.9038  
Listeria\_monocytogenes\_HCC23\_552536 0.9116  
Listeria\_monocytogenes\_HCC23\_552536 0.909  
Listeria\_monocytogenes\_HCC23\_552536 0.9131  
Listeria\_monocytogenes\_HCC23\_552536 0.8949  
Listeria\_monocytogenes\_HCC23\_552536 0.9105  
Listeria\_monocytogenes\_HCC23\_552536 0.9078  
Listeria\_monocytogenes\_HCC23\_552536 0.9052  
Listeria\_monocytogenes\_HCC23\_552536 0.9282  
Listeria\_monocytogenes\_HCC23\_552536 0.9012  
Listeria\_monocytogenes\_HCC23\_552536 0.9098  
Listeria\_monocytogenes\_HCC23\_552536 0.8984

|                                                          |                                     |        |
|----------------------------------------------------------|-------------------------------------|--------|
| Listeria_monocytogenes_serotype_4b_str_F2365_265669      | Listeria_monocytogenes_HCC23_552536 | 0.9098 |
| Listeria_monocytogenes_serotype_4b_str_CLIP_80459_568819 | Listeria_monocytogenes_HCC23_552536 | 0.9154 |
| Listeria_monocytogenes_serotype_4b_str_81-0861_1196161   | Listeria_monocytogenes_HCC23_552536 | 0.9085 |
| Listeria_monocytogenes_serotype_4b_str_81-0592_1196160   | Listeria_monocytogenes_HCC23_552536 | 0.9095 |
| Listeria_monocytogenes_serotype_4b_str_81-0558_1196159   | Listeria_monocytogenes_HCC23_552536 | 0.9102 |
| Listeria_monocytogenes_serotype_4b_str_10-0809_1196162   | Listeria_monocytogenes_HCC23_552536 | 0.9095 |
| Listeria_monocytogenes_serotype_4b_str_02-6680_1196175   | Listeria_monocytogenes_HCC23_552536 | 0.9092 |
| Listeria_monocytogenes_serotype_4b_str_02-6679_1196174   | Listeria_monocytogenes_HCC23_552536 | 0.9092 |
| Listeria_monocytogenes_serotype_4b_str_02-1792_1196173   | Listeria_monocytogenes_HCC23_552536 | 0.9106 |
| Listeria_monocytogenes_serotype_4b_str_02-1289_1196172   | Listeria_monocytogenes_HCC23_552536 | 0.9106 |
| Listeria_monocytogenes_serotype_4b_str_02-1103_1196171   | Listeria_monocytogenes_HCC23_552536 | 0.9106 |
| Listeria_monocytogenes_serotype_3c_str_10-5027_1196195   | Listeria_monocytogenes_HCC23_552536 | 0.907  |
| Listeria_monocytogenes_serotype_1_2c_str_10-5026_1196194 | Listeria_monocytogenes_HCC23_552536 | 0.9074 |
| Listeria_monocytogenes_serotype_1_2c_str_10-5025_1196193 | Listeria_monocytogenes_HCC23_552536 | 0.9074 |
| Listeria_monocytogenes_serotype_1_2b_str_10-0811_1196164 | Listeria_monocytogenes_HCC23_552536 | 0.9144 |
| Listeria_monocytogenes_serotype_1_2b_str_10-0810_1196163 | Listeria_monocytogenes_HCC23_552536 | 0.9144 |
| Listeria_monocytogenes_serotype_1_2a_str_99-6370_1196179 | Listeria_monocytogenes_HCC23_552536 | 0.8963 |
| Listeria_monocytogenes_serotype_1_2a_str_98-2035_1196178 | Listeria_monocytogenes_HCC23_552536 | 0.8963 |
| Listeria_monocytogenes_serotype_1_2a_str_95-0093_1196177 | Listeria_monocytogenes_HCC23_552536 | 0.8985 |
| Listeria_monocytogenes_serotype_1_2a_str_88-0478_1196176 | Listeria_monocytogenes_HCC23_552536 | 0.8985 |
| Listeria_monocytogenes_serotype_1_2a_str_10-5024_1196192 | Listeria_monocytogenes_HCC23_552536 | 0.8992 |
| Listeria_monocytogenes_serotype_1_2a_str_10-4758_1196168 | Listeria_monocytogenes_HCC23_552536 | 0.9147 |
| Listeria_monocytogenes_serotype_1_2a_str_10-4754_1196167 | Listeria_monocytogenes_HCC23_552536 | 0.9147 |
| Listeria_monocytogenes_serotype_1_2a_str_10-1321_1196191 | Listeria_monocytogenes_HCC23_552536 | 0.8992 |
| Listeria_monocytogenes_serotype_1_2a_str_10-1047_1196190 | Listeria_monocytogenes_HCC23_552536 | 0.8992 |
| Listeria_monocytogenes_serotype_1_2a_str_10-1046_1196189 | Listeria_monocytogenes_HCC23_552536 | 0.8992 |
| Listeria_monocytogenes_serotype_1_2a_str_10-0934_1196170 | Listeria_monocytogenes_HCC23_552536 | 0.9083 |
| Listeria_monocytogenes_serotype_1_2a_str_10-0933_1196169 | Listeria_monocytogenes_HCC23_552536 | 0.9083 |
| Listeria_monocytogenes_serotype_1_2a_str_10-0815_1196188 | Listeria_monocytogenes_HCC23_552536 | 0.8961 |
| Listeria_monocytogenes_serotype_1_2a_str_10-0814_1196187 | Listeria_monocytogenes_HCC23_552536 | 0.8993 |
| Listeria_monocytogenes_serotype_1_2a_str_10-0813_1196166 | Listeria_monocytogenes_HCC23_552536 | 0.9145 |
| Listeria_monocytogenes_serotype_1_2a_str_10-0812_1196165 | Listeria_monocytogenes_HCC23_552536 | 0.9145 |
| Listeria_monocytogenes_serotype_1_2a_str_08-7669_1196186 | Listeria_monocytogenes_HCC23_552536 | 0.8956 |
| Listeria_monocytogenes_serotype_1_2a_str_08-7374_1196185 | Listeria_monocytogenes_HCC23_552536 | 0.8992 |
| Listeria_monocytogenes_serotype_1_2a_str_08-6997_1196184 | Listeria_monocytogenes_HCC23_552536 | 0.8961 |
| Listeria_monocytogenes_serotype_1_2a_str_08-6569_1196183 | Listeria_monocytogenes_HCC23_552536 | 0.8961 |
| Listeria_monocytogenes_serotype_1_2a_str_08-6056_1196182 | Listeria_monocytogenes_HCC23_552536 | 0.8961 |
| Listeria_monocytogenes_serotype_1_2a_str_04-5457_1196181 | Listeria_monocytogenes_HCC23_552536 | 0.8992 |
| Listeria_monocytogenes_serotype_1_2a_str_02-5993_1196180 | Listeria_monocytogenes_HCC23_552536 | 0.8989 |
| Listeria_monocytogenes_R479a_1437838                     | Listeria_monocytogenes_HCC23_552536 | 0.8953 |
| Listeria_monocytogenes_N53-1_1234142                     | Listeria_monocytogenes_HCC23_552536 | 0.868  |
| Listeria_monocytogenes_M7_1030009                        | Listeria_monocytogenes_HCC23_552536 | 0.9989 |
| Listeria_monocytogenes_LO28_393132                       | Listeria_monocytogenes_HCC23_552536 | 0.912  |
| Listeria_monocytogenes_L99_563174                        | Listeria_monocytogenes_HCC23_552536 | 0.9989 |
| Listeria_monocytogenes_L312_882094                       | Listeria_monocytogenes_HCC23_552536 | 0.9154 |
| Listeria_monocytogenes_J1816_930781                      | Listeria_monocytogenes_HCC23_552536 | 0.8995 |
| Listeria_monocytogenes_J1-220_930782                     | Listeria_monocytogenes_HCC23_552536 | 0.9131 |
| Listeria_monocytogenes_J0161_393130                      | Listeria_monocytogenes_HCC23_552536 | 0.9105 |
| Listeria_monocytogenes_HCC23_552536                      | Listeria_monocytogenes_HCC23_552536 | 0.0673 |
| Listeria_welshimeri_1643                                 | Listeria_monocytogenes_J0161_393130 | 0.866  |
| Listeria_welshimeri_serovar_6b_str_SLCC5334_386043       | Listeria_monocytogenes_J0161_393130 | 0.8653 |
| Listeria_seeligeri_serovar_1_2b_str_SLCC3954_683837      | Listeria_monocytogenes_J0161_393130 | 0.8794 |
| Listeria_seeligeri_FSL_S4-171_702452                     | Listeria_monocytogenes_J0161_393130 | 0.8218 |
| Listeria_seeligeri_FSL_N1-067_702453                     | Listeria_monocytogenes_J0161_393130 | 0.8357 |
| Listeria_seeligeri_1640_v1                               | Listeria_monocytogenes_J0161_393130 | 0.8749 |
| Listeria_seeligeri_1640                                  | Listeria_monocytogenes_J0161_393130 | 0.8818 |
| Listeria_monocytogenes_WSLC1042_1457188                  | Listeria_monocytogenes_J0161_393130 | 0.9223 |
| Listeria_monocytogenes_WSLC1001_1457187                  | Listeria_monocytogenes_J0161_393130 | 0.9424 |
| Listeria_monocytogenes_SLCC7179_879090                   | Listeria_monocytogenes_J0161_393130 | 0.9627 |
| Listeria_monocytogenes_SLCC5850_882096                   | Listeria_monocytogenes_J0161_393130 | 0.9448 |
| Listeria_monocytogenes_SLCC2755_932919                   | Listeria_monocytogenes_J0161_393130 | 0.9277 |
| Listeria_monocytogenes_SLCC2540_879089                   | Listeria_monocytogenes_J0161_393130 | 0.9304 |
| Listeria_monocytogenes_SLCC2479_882020                   | Listeria_monocytogenes_J0161_393130 | 0.9447 |
| Listeria_monocytogenes_SLCC2378_879088                   | Listeria_monocytogenes_J0161_393130 | 0.9237 |
| Listeria_monocytogenes_SLCC2376_882097                   | Listeria_monocytogenes_J0161_393130 | 0.9273 |
| Listeria_monocytogenes_SLCC2372_932920                   | Listeria_monocytogenes_J0161_393130 | 0.9381 |
| Listeria_monocytogenes_serotype_4b_str_LL195_1230340     | Listeria_monocytogenes_J0161_393130 | 0.9293 |
| Listeria_monocytogenes_serotype_4b_str_LIS0087_1134669   | Listeria_monocytogenes_J0161_393130 | 0.9341 |
| Listeria_monocytogenes_serotype_4b_str_F2365_265669      | Listeria_monocytogenes_J0161_393130 | 0.9293 |
| Listeria_monocytogenes_serotype_4b_str_CLIP_80459_568819 | Listeria_monocytogenes_J0161_393130 | 0.936  |
| Listeria_monocytogenes_serotype_4b_str_81-0861_1196161   | Listeria_monocytogenes_J0161_393130 | 0.9275 |
| Listeria_monocytogenes_serotype_4b_str_81-0592_1196160   | Listeria_monocytogenes_J0161_393130 | 0.9286 |
| Listeria_monocytogenes_serotype_4b_str_81-0558_1196159   | Listeria_monocytogenes_J0161_393130 | 0.9293 |
| Listeria_monocytogenes_serotype_4b_str_10-0809_1196162   | Listeria_monocytogenes_J0161_393130 | 0.9286 |
| Listeria_monocytogenes_serotype_4b_str_02-6680_1196175   | Listeria_monocytogenes_J0161_393130 | 0.9309 |
| Listeria_monocytogenes_serotype_4b_str_02-6679_1196174   | Listeria_monocytogenes_J0161_393130 | 0.9309 |
| Listeria_monocytogenes_serotype_4b_str_02-1792_1196173   | Listeria_monocytogenes_J0161_393130 | 0.9334 |
| Listeria_monocytogenes_serotype_4b_str_02-1289_1196172   | Listeria_monocytogenes_J0161_393130 | 0.9334 |
| Listeria_monocytogenes_serotype_4b_str_02-1103_1196171   | Listeria_monocytogenes_J0161_393130 | 0.9334 |
| Listeria_monocytogenes_serotype_3c_str_10-5027_1196195   | Listeria_monocytogenes_J0161_393130 | 0.9447 |
| Listeria_monocytogenes_serotype_1_2c_str_10-5026_1196194 | Listeria_monocytogenes_J0161_393130 | 0.9458 |
| Listeria_monocytogenes_serotype_1_2c_str_10-5025_1196193 | Listeria_monocytogenes_J0161_393130 | 0.9458 |
| Listeria_monocytogenes_serotype_1_2b_str_10-0811_1196164 | Listeria_monocytogenes_J0161_393130 | 0.9357 |
| Listeria_monocytogenes_serotype_1_2b_str_10-0810_1196163 | Listeria_monocytogenes_J0161_393130 | 0.9357 |
| Listeria_monocytogenes_serotype_1_2a_str_99-6370_1196179 | Listeria_monocytogenes_J0161_393130 | 0.937  |
| Listeria_monocytogenes_serotype_1_2a_str_98-2035_1196178 | Listeria_monocytogenes_J0161_393130 | 0.937  |
| Listeria_monocytogenes_serotype_1_2a_str_95-0093_1196177 | Listeria_monocytogenes_J0161_393130 | 0.9425 |
| Listeria_monocytogenes_serotype_1_2a_str_88-0478_1196176 | Listeria_monocytogenes_J0161_393130 | 0.9428 |
| Listeria_monocytogenes_serotype_1_2a_str_10-5024_1196192 | Listeria_monocytogenes_J0161_393130 | 0.9428 |
| Listeria_monocytogenes_serotype_1_2a_str_10-4758_1196168 | Listeria_monocytogenes_J0161_393130 | 0.9456 |
| Listeria_monocytogenes_serotype_1_2a_str_10-4754_1196167 | Listeria_monocytogenes_J0161_393130 | 0.9456 |

|                                                          |                                      |        |
|----------------------------------------------------------|--------------------------------------|--------|
| Listeria_monocytogenes_serotype_1_2a_str_10-1321_1196191 | Listeria_monocytogenes_J0161_393130  | 0.9428 |
| Listeria_monocytogenes_serotype_1_2a_str_10-1047_1196190 | Listeria_monocytogenes_J0161_393130  | 0.9432 |
| Listeria_monocytogenes_serotype_1_2a_str_10-1046_1196189 | Listeria_monocytogenes_J0161_393130  | 0.9432 |
| Listeria_monocytogenes_serotype_1_2a_str_10-0934_1196170 | Listeria_monocytogenes_J0161_393130  | 0.9533 |
| Listeria_monocytogenes_serotype_1_2a_str_10-0933_1196169 | Listeria_monocytogenes_J0161_393130  | 0.9533 |
| Listeria_monocytogenes_serotype_1_2a_str_10-0815_1196188 | Listeria_monocytogenes_J0161_393130  | 0.938  |
| Listeria_monocytogenes_serotype_1_2a_str_10-0814_1196187 | Listeria_monocytogenes_J0161_393130  | 0.9425 |
| Listeria_monocytogenes_serotype_1_2a_str_10-0813_1196166 | Listeria_monocytogenes_J0161_393130  | 0.9534 |
| Listeria_monocytogenes_serotype_1_2a_str_10-0812_1196165 | Listeria_monocytogenes_J0161_393130  | 0.9534 |
| Listeria_monocytogenes_serotype_1_2a_str_08-7669_1196186 | Listeria_monocytogenes_J0161_393130  | 0.9508 |
| Listeria_monocytogenes_serotype_1_2a_str_08-7374_1196185 | Listeria_monocytogenes_J0161_393130  | 0.9428 |
| Listeria_monocytogenes_serotype_1_2a_str_08-6997_1196184 | Listeria_monocytogenes_J0161_393130  | 0.938  |
| Listeria_monocytogenes_serotype_1_2a_str_08-6569_1196183 | Listeria_monocytogenes_J0161_393130  | 0.938  |
| Listeria_monocytogenes_serotype_1_2a_str_08-6056_1196182 | Listeria_monocytogenes_J0161_393130  | 0.938  |
| Listeria_monocytogenes_serotype_1_2a_str_04-5457_1196181 | Listeria_monocytogenes_J0161_393130  | 0.9428 |
| Listeria_monocytogenes_serotype_1_2a_str_02-5993_1196180 | Listeria_monocytogenes_J0161_393130  | 0.9425 |
| Listeria_monocytogenes_R479a_1437838                     | Listeria_monocytogenes_J0161_393130  | 0.9399 |
| Listeria_monocytogenes_N53-1_1234142                     | Listeria_monocytogenes_J0161_393130  | 0.9062 |
| Listeria_monocytogenes_M7_1030009                        | Listeria_monocytogenes_J0161_393130  | 0.9102 |
| Listeria_monocytogenes_LO28_393132                       | Listeria_monocytogenes_J0161_393130  | 0.9474 |
| Listeria_monocytogenes_L99_563174                        | Listeria_monocytogenes_J0161_393130  | 0.9108 |
| Listeria_monocytogenes_L312_882094                       | Listeria_monocytogenes_J0161_393130  | 0.936  |
| Listeria_monocytogenes_J1816_930781                      | Listeria_monocytogenes_J0161_393130  | 0.9266 |
| Listeria_monocytogenes_J1-220_930782                     | Listeria_monocytogenes_J0161_393130  | 0.9269 |
| Listeria_monocytogenes_J0161_393130                      | Listeria_monocytogenes_J0161_393130  | 0.0719 |
| Listeria_welshimeri_1643                                 | Listeria_monocytogenes_J1-220_930782 | 0.8813 |
| Listeria_welshimeri_serovar_6b_str_SLCC5334_386043       | Listeria_monocytogenes_J1-220_930782 | 0.881  |
| Listeria_seeligeri_serovar_1_2b_str_SLCC3954_683837      | Listeria_monocytogenes_J1-220_930782 | 0.8709 |
| Listeria_seeligeri_FSL_S4-171_702452                     | Listeria_monocytogenes_J1-220_930782 | 0.8177 |
| Listeria_seeligeri_FSL_N1-067_702453                     | Listeria_monocytogenes_J1-220_930782 | 0.8256 |
| Listeria_seeligeri_1640_v1                               | Listeria_monocytogenes_J1-220_930782 | 0.8758 |
| Listeria_seeligeri_1640                                  | Listeria_monocytogenes_J1-220_930782 | 0.873  |
| Listeria_monocytogenes_WSLC1042_1457188                  | Listeria_monocytogenes_J1-220_930782 | 0.9604 |
| Listeria_monocytogenes_WSLC1001_1457187                  | Listeria_monocytogenes_J1-220_930782 | 0.9241 |
| Listeria_monocytogenes_SLCC7179_879090                   | Listeria_monocytogenes_J1-220_930782 | 0.9298 |
| Listeria_monocytogenes_SLCC5850_882096                   | Listeria_monocytogenes_J1-220_930782 | 0.9271 |
| Listeria_monocytogenes_SLCC2755_932919                   | Listeria_monocytogenes_J1-220_930782 | 0.927  |
| Listeria_monocytogenes_SLCC2540_879089                   | Listeria_monocytogenes_J1-220_930782 | 0.9412 |
| Listeria_monocytogenes_SLCC2479_882020                   | Listeria_monocytogenes_J1-220_930782 | 0.9209 |
| Listeria_monocytogenes_SLCC2378_879088                   | Listeria_monocytogenes_J1-220_930782 | 0.9615 |
| Listeria_monocytogenes_SLCC2376_882097                   | Listeria_monocytogenes_J1-220_930782 | 0.922  |
| Listeria_monocytogenes_SLCC2372_932920                   | Listeria_monocytogenes_J1-220_930782 | 0.9142 |
| Listeria_monocytogenes_serotype_4b_str_LL195_1230340     | Listeria_monocytogenes_J1-220_930782 | 0.9567 |
| Listeria_monocytogenes_serotype_4b_str_LIS0087_1134669   | Listeria_monocytogenes_J1-220_930782 | 0.9114 |
| Listeria_monocytogenes_serotype_4b_str_F2365_265669      | Listeria_monocytogenes_J1-220_930782 | 0.9567 |
| Listeria_monocytogenes_serotype_4b_str_CLIP_80459_568819 | Listeria_monocytogenes_J1-220_930782 | 0.9525 |
| Listeria_monocytogenes_serotype_4b_str_81-0861_1196161   | Listeria_monocytogenes_J1-220_930782 | 0.9674 |
| Listeria_monocytogenes_serotype_4b_str_81-0592_1196160   | Listeria_monocytogenes_J1-220_930782 | 0.9685 |
| Listeria_monocytogenes_serotype_4b_str_81-0558_1196159   | Listeria_monocytogenes_J1-220_930782 | 0.9678 |
| Listeria_monocytogenes_serotype_4b_str_10-0809_1196162   | Listeria_monocytogenes_J1-220_930782 | 0.9685 |
| Listeria_monocytogenes_serotype_4b_str_02-6680_1196175   | Listeria_monocytogenes_J1-220_930782 | 0.9586 |
| Listeria_monocytogenes_serotype_4b_str_02-6679_1196174   | Listeria_monocytogenes_J1-220_930782 | 0.9586 |
| Listeria_monocytogenes_serotype_4b_str_02-1792_1196173   | Listeria_monocytogenes_J1-220_930782 | 0.97   |
| Listeria_monocytogenes_serotype_4b_str_02-1289_1196172   | Listeria_monocytogenes_J1-220_930782 | 0.97   |
| Listeria_monocytogenes_serotype_4b_str_02-1103_1196171   | Listeria_monocytogenes_J1-220_930782 | 0.97   |
| Listeria_monocytogenes_serotype_3c_str_10-5027_1196195   | Listeria_monocytogenes_J1-220_930782 | 0.9246 |
| Listeria_monocytogenes_serotype_1_2c_str_10-5026_1196194 | Listeria_monocytogenes_J1-220_930782 | 0.9246 |
| Listeria_monocytogenes_serotype_1_2c_str_10-5025_1196193 | Listeria_monocytogenes_J1-220_930782 | 0.9246 |
| Listeria_monocytogenes_serotype_1_2b_str_10-0811_1196164 | Listeria_monocytogenes_J1-220_930782 | 0.9463 |
| Listeria_monocytogenes_serotype_1_2b_str_10-0810_1196163 | Listeria_monocytogenes_J1-220_930782 | 0.9463 |
| Listeria_monocytogenes_serotype_1_2a_str_99-6370_1196179 | Listeria_monocytogenes_J1-220_930782 | 0.9154 |
| Listeria_monocytogenes_serotype_1_2a_str_98-2035_1196178 | Listeria_monocytogenes_J1-220_930782 | 0.9154 |
| Listeria_monocytogenes_serotype_1_2a_str_95-0093_1196177 | Listeria_monocytogenes_J1-220_930782 | 0.9189 |
| Listeria_monocytogenes_serotype_1_2a_str_88-0478_1196176 | Listeria_monocytogenes_J1-220_930782 | 0.9185 |
| Listeria_monocytogenes_serotype_1_2a_str_10-5024_1196192 | Listeria_monocytogenes_J1-220_930782 | 0.9196 |
| Listeria_monocytogenes_serotype_1_2a_str_10-4758_1196168 | Listeria_monocytogenes_J1-220_930782 | 0.9295 |
| Listeria_monocytogenes_serotype_1_2a_str_10-4754_1196167 | Listeria_monocytogenes_J1-220_930782 | 0.9298 |
| Listeria_monocytogenes_serotype_1_2a_str_10-1321_1196191 | Listeria_monocytogenes_J1-220_930782 | 0.9196 |
| Listeria_monocytogenes_serotype_1_2a_str_10-1047_1196190 | Listeria_monocytogenes_J1-220_930782 | 0.9192 |
| Listeria_monocytogenes_serotype_1_2a_str_10-1046_1196189 | Listeria_monocytogenes_J1-220_930782 | 0.9192 |
| Listeria_monocytogenes_serotype_1_2a_str_10-0934_1196170 | Listeria_monocytogenes_J1-220_930782 | 0.927  |
| Listeria_monocytogenes_serotype_1_2a_str_10-0933_1196169 | Listeria_monocytogenes_J1-220_930782 | 0.927  |
| Listeria_monocytogenes_serotype_1_2a_str_10-0815_1196188 | Listeria_monocytogenes_J1-220_930782 | 0.916  |
| Listeria_monocytogenes_serotype_1_2a_str_10-0814_1196187 | Listeria_monocytogenes_J1-220_930782 | 0.92   |
| Listeria_monocytogenes_serotype_1_2a_str_10-0813_1196166 | Listeria_monocytogenes_J1-220_930782 | 0.9303 |
| Listeria_monocytogenes_serotype_1_2a_str_10-0812_1196165 | Listeria_monocytogenes_J1-220_930782 | 0.9303 |
| Listeria_monocytogenes_serotype_1_2a_str_08-7669_1196186 | Listeria_monocytogenes_J1-220_930782 | 0.9195 |
| Listeria_monocytogenes_serotype_1_2a_str_08-7374_1196185 | Listeria_monocytogenes_J1-220_930782 | 0.9196 |
| Listeria_monocytogenes_serotype_1_2a_str_08-6997_1196184 | Listeria_monocytogenes_J1-220_930782 | 0.916  |
| Listeria_monocytogenes_serotype_1_2a_str_08-6569_1196183 | Listeria_monocytogenes_J1-220_930782 | 0.916  |
| Listeria_monocytogenes_serotype_1_2a_str_08-6056_1196182 | Listeria_monocytogenes_J1-220_930782 | 0.916  |
| Listeria_monocytogenes_serotype_1_2a_str_04-5457_1196181 | Listeria_monocytogenes_J1-220_930782 | 0.9196 |
| Listeria_monocytogenes_serotype_1_2a_str_02-5993_1196180 | Listeria_monocytogenes_J1-220_930782 | 0.9196 |
| Listeria_monocytogenes_R479a_1437838                     | Listeria_monocytogenes_J1-220_930782 | 0.9171 |
| Listeria_monocytogenes_N53-1_1234142                     | Listeria_monocytogenes_J1-220_930782 | 0.881  |
| Listeria_monocytogenes_M7_1030009                        | Listeria_monocytogenes_J1-220_930782 | 0.9139 |
| Listeria_monocytogenes_LO28_393132                       | Listeria_monocytogenes_J1-220_930782 | 0.9273 |
| Listeria_monocytogenes_L99_563174                        | Listeria_monocytogenes_J1-220_930782 | 0.9142 |
| Listeria_monocytogenes_L312_882094                       | Listeria_monocytogenes_J1-220_930782 | 0.9529 |
| Listeria_monocytogenes_J1816_930781                      | Listeria_monocytogenes_J1-220_930782 | 0.9399 |
| Listeria_monocytogenes_J1-220_930782                     | Listeria_monocytogenes_J1-220_930782 | 0.0727 |

|                                                          |                                     |        |
|----------------------------------------------------------|-------------------------------------|--------|
| Listeria_welshimeri_1643                                 | Listeria_monocytogenes_J1816_930781 | 0.8672 |
| Listeria_welshimeri_serovar_6b_str_SLCC5334_386043       | Listeria_monocytogenes_J1816_930781 | 0.8665 |
| Listeria_seeligeri_serovar_1_2b_str_SLCC3954_683837      | Listeria_monocytogenes_J1816_930781 | 0.8734 |
| Listeria_seeligeri_FSL_S4-171_702452                     | Listeria_monocytogenes_J1816_930781 | 0.8282 |
| Listeria_seeligeri_FSL_N1-067_702453                     | Listeria_monocytogenes_J1816_930781 | 0.8298 |
| Listeria_seeligeri_1640_v1                               | Listeria_monocytogenes_J1816_930781 | 0.8799 |
| Listeria_seeligeri_1640                                  | Listeria_monocytogenes_J1816_930781 | 0.8796 |
| Listeria_monocytogenes_WSLC1042_1457188                  | Listeria_monocytogenes_J1816_930781 | 0.9483 |
| Listeria_monocytogenes_WSLC1001_1457187                  | Listeria_monocytogenes_J1816_930781 | 0.9204 |
| Listeria_monocytogenes_SLCC7179_879090                   | Listeria_monocytogenes_J1816_930781 | 0.9276 |
| Listeria_monocytogenes_SLCC5850_882096                   | Listeria_monocytogenes_J1816_930781 | 0.9246 |
| Listeria_monocytogenes_SLCC2755_932919                   | Listeria_monocytogenes_J1816_930781 | 0.9311 |
| Listeria_monocytogenes_SLCC2540_879089                   | Listeria_monocytogenes_J1816_930781 | 0.9335 |
| Listeria_monocytogenes_SLCC2479_882020                   | Listeria_monocytogenes_J1816_930781 | 0.924  |
| Listeria_monocytogenes_SLCC2378_879088                   | Listeria_monocytogenes_J1816_930781 | 0.9497 |
| Listeria_monocytogenes_SLCC2376_882097                   | Listeria_monocytogenes_J1816_930781 | 0.9274 |
| Listeria_monocytogenes_SLCC2372_932920                   | Listeria_monocytogenes_J1816_930781 | 0.9168 |
| Listeria_monocytogenes_serotype_4b_str_LL195_1230340     | Listeria_monocytogenes_J1816_930781 | 0.955  |
| Listeria_monocytogenes_serotype_4b_str_LIS0087_1134669   | Listeria_monocytogenes_J1816_930781 | 0.9054 |
| Listeria_monocytogenes_serotype_4b_str_F2365_265669      | Listeria_monocytogenes_J1816_930781 | 0.955  |
| Listeria_monocytogenes_serotype_4b_str_CLIP_80459_568819 | Listeria_monocytogenes_J1816_930781 | 0.9565 |
| Listeria_monocytogenes_serotype_4b_str_81-0861_1196161   | Listeria_monocytogenes_J1816_930781 | 0.9473 |
| Listeria_monocytogenes_serotype_4b_str_81-0592_1196160   | Listeria_monocytogenes_J1816_930781 | 0.948  |
| Listeria_monocytogenes_serotype_4b_str_81-0558_1196159   | Listeria_monocytogenes_J1816_930781 | 0.9479 |
| Listeria_monocytogenes_serotype_4b_str_10-0809_1196162   | Listeria_monocytogenes_J1816_930781 | 0.9483 |
| Listeria_monocytogenes_serotype_4b_str_02-6680_1196175   | Listeria_monocytogenes_J1816_930781 | 0.9547 |
| Listeria_monocytogenes_serotype_4b_str_02-6679_1196174   | Listeria_monocytogenes_J1816_930781 | 0.9547 |
| Listeria_monocytogenes_serotype_4b_str_02-1792_1196173   | Listeria_monocytogenes_J1816_930781 | 0.948  |
| Listeria_monocytogenes_serotype_4b_str_02-1289_1196172   | Listeria_monocytogenes_J1816_930781 | 0.948  |
| Listeria_monocytogenes_serotype_4b_str_02-1103_1196171   | Listeria_monocytogenes_J1816_930781 | 0.948  |
| Listeria_monocytogenes_serotype_3c_str_10-5027_1196195   | Listeria_monocytogenes_J1816_930781 | 0.9258 |
| Listeria_monocytogenes_serotype_1_2c_str_10-5026_1196194 | Listeria_monocytogenes_J1816_930781 | 0.9269 |
| Listeria_monocytogenes_serotype_1_2c_str_10-5025_1196193 | Listeria_monocytogenes_J1816_930781 | 0.9269 |
| Listeria_monocytogenes_serotype_1_2b_str_10-0811_1196164 | Listeria_monocytogenes_J1816_930781 | 0.9361 |
| Listeria_monocytogenes_serotype_1_2b_str_10-0810_1196163 | Listeria_monocytogenes_J1816_930781 | 0.9361 |
| Listeria_monocytogenes_serotype_1_2a_str_99-6370_1196179 | Listeria_monocytogenes_J1816_930781 | 0.915  |
| Listeria_monocytogenes_serotype_1_2a_str_98-2035_1196178 | Listeria_monocytogenes_J1816_930781 | 0.915  |
| Listeria_monocytogenes_serotype_1_2a_str_95-0093_1196177 | Listeria_monocytogenes_J1816_930781 | 0.9197 |
| Listeria_monocytogenes_serotype_1_2a_str_88-0478_1196176 | Listeria_monocytogenes_J1816_930781 | 0.9192 |
| Listeria_monocytogenes_serotype_1_2a_str_10-5024_1196192 | Listeria_monocytogenes_J1816_930781 | 0.92   |
| Listeria_monocytogenes_serotype_1_2a_str_10-4758_1196168 | Listeria_monocytogenes_J1816_930781 | 0.9247 |
| Listeria_monocytogenes_serotype_1_2a_str_10-4754_1196167 | Listeria_monocytogenes_J1816_930781 | 0.9243 |
| Listeria_monocytogenes_serotype_1_2a_str_10-1321_1196191 | Listeria_monocytogenes_J1816_930781 | 0.92   |
| Listeria_monocytogenes_serotype_1_2a_str_10-1047_1196190 | Listeria_monocytogenes_J1816_930781 | 0.9204 |
| Listeria_monocytogenes_serotype_1_2a_str_10-1046_1196189 | Listeria_monocytogenes_J1816_930781 | 0.9204 |
| Listeria_monocytogenes_serotype_1_2a_str_10-0934_1196170 | Listeria_monocytogenes_J1816_930781 | 0.9321 |
| Listeria_monocytogenes_serotype_1_2a_str_10-0933_1196169 | Listeria_monocytogenes_J1816_930781 | 0.9321 |
| Listeria_monocytogenes_serotype_1_2a_str_10-0815_1196188 | Listeria_monocytogenes_J1816_930781 | 0.9157 |
| Listeria_monocytogenes_serotype_1_2a_str_10-0814_1196187 | Listeria_monocytogenes_J1816_930781 | 0.92   |
| Listeria_monocytogenes_serotype_1_2a_str_10-0813_1196166 | Listeria_monocytogenes_J1816_930781 | 0.9237 |
| Listeria_monocytogenes_serotype_1_2a_str_10-0812_1196165 | Listeria_monocytogenes_J1816_930781 | 0.9237 |
| Listeria_monocytogenes_serotype_1_2a_str_08-7669_1196186 | Listeria_monocytogenes_J1816_930781 | 0.9278 |
| Listeria_monocytogenes_serotype_1_2a_str_08-7374_1196185 | Listeria_monocytogenes_J1816_930781 | 0.92   |
| Listeria_monocytogenes_serotype_1_2a_str_08-6997_1196184 | Listeria_monocytogenes_J1816_930781 | 0.9157 |
| Listeria_monocytogenes_serotype_1_2a_str_08-6569_1196183 | Listeria_monocytogenes_J1816_930781 | 0.9157 |
| Listeria_monocytogenes_serotype_1_2a_str_08-6056_1196182 | Listeria_monocytogenes_J1816_930781 | 0.9157 |
| Listeria_monocytogenes_serotype_1_2a_str_04-5457_1196181 | Listeria_monocytogenes_J1816_930781 | 0.92   |
| Listeria_monocytogenes_serotype_1_2a_str_02-5993_1196180 | Listeria_monocytogenes_J1816_930781 | 0.9197 |
| Listeria_monocytogenes_R479a_1437838                     | Listeria_monocytogenes_J1816_930781 | 0.9183 |
| Listeria_monocytogenes_N53-1_1234142                     | Listeria_monocytogenes_J1816_930781 | 0.8824 |
| Listeria_monocytogenes_M7_1030009                        | Listeria_monocytogenes_J1816_930781 | 0.8996 |
| Listeria_monocytogenes_LO28_393132                       | Listeria_monocytogenes_J1816_930781 | 0.9204 |
| Listeria_monocytogenes_L99_563174                        | Listeria_monocytogenes_J1816_930781 | 0.9002 |
| Listeria_monocytogenes_L312_882094                       | Listeria_monocytogenes_J1816_930781 | 0.9569 |
| Listeria_monocytogenes_J1816_930781                      | Listeria_monocytogenes_J1816_930781 | 0.0737 |
| Listeria_welshimeri_1643                                 | Listeria_monocytogenes_L312_882094  | 0.8863 |
| Listeria_welshimeri_serovar_6b_str_SLCC5334_386043       | Listeria_monocytogenes_L312_882094  | 0.8856 |
| Listeria_seeligeri_serovar_1_2b_str_SLCC3954_683837      | Listeria_monocytogenes_L312_882094  | 0.8905 |
| Listeria_seeligeri_FSL_S4-171_702452                     | Listeria_monocytogenes_L312_882094  | 0.8329 |
| Listeria_seeligeri_FSL_N1-067_702453                     | Listeria_monocytogenes_L312_882094  | 0.831  |
| Listeria_seeligeri_1640_v1                               | Listeria_monocytogenes_L312_882094  | 0.8966 |
| Listeria_seeligeri_1640                                  | Listeria_monocytogenes_L312_882094  | 0.8888 |
| Listeria_monocytogenes_WSLC1042_1457188                  | Listeria_monocytogenes_L312_882094  | 0.972  |
| Listeria_monocytogenes_WSLC1001_1457187                  | Listeria_monocytogenes_L312_882094  | 0.9385 |
| Listeria_monocytogenes_SLCC7179_879090                   | Listeria_monocytogenes_L312_882094  | 0.9434 |
| Listeria_monocytogenes_SLCC5850_882096                   | Listeria_monocytogenes_L312_882094  | 0.9432 |
| Listeria_monocytogenes_SLCC2755_932919                   | Listeria_monocytogenes_L312_882094  | 0.9536 |
| Listeria_monocytogenes_SLCC2540_879089                   | Listeria_monocytogenes_L312_882094  | 0.9538 |
| Listeria_monocytogenes_SLCC2479_882020                   | Listeria_monocytogenes_L312_882094  | 0.9337 |
| Listeria_monocytogenes_SLCC2378_879088                   | Listeria_monocytogenes_L312_882094  | 0.9731 |
| Listeria_monocytogenes_SLCC2376_882097                   | Listeria_monocytogenes_L312_882094  | 0.9508 |
| Listeria_monocytogenes_SLCC2372_932920                   | Listeria_monocytogenes_L312_882094  | 0.9263 |
| Listeria_monocytogenes_serotype_4b_str_LL195_1230340     | Listeria_monocytogenes_L312_882094  | 0.9795 |
| Listeria_monocytogenes_serotype_4b_str_LIS0087_1134669   | Listeria_monocytogenes_L312_882094  | 0.9187 |
| Listeria_monocytogenes_serotype_4b_str_F2365_265669      | Listeria_monocytogenes_L312_882094  | 0.9795 |
| Listeria_monocytogenes_serotype_4b_str_CLIP_80459_568819 | Listeria_monocytogenes_L312_882094  | 0.9992 |
| Listeria_monocytogenes_serotype_4b_str_81-0861_1196161   | Listeria_monocytogenes_L312_882094  | 0.9613 |
| Listeria_monocytogenes_serotype_4b_str_81-0592_1196160   | Listeria_monocytogenes_L312_882094  | 0.9624 |
| Listeria_monocytogenes_serotype_4b_str_81-0558_1196159   | Listeria_monocytogenes_L312_882094  | 0.9635 |
| Listeria_monocytogenes_serotype_4b_str_10-0809_1196162   | Listeria_monocytogenes_L312_882094  | 0.9628 |
| Listeria_monocytogenes_serotype_4b_str_02-6680_1196175   | Listeria_monocytogenes_L312_882094  | 0.9815 |

|                                                          |                                    |        |
|----------------------------------------------------------|------------------------------------|--------|
| Listeria_monocytogenes_serotype_4b_str_02-6679_1196174   | Listeria_monocytogenes_L312_882094 | 0.9815 |
| Listeria_monocytogenes_serotype_4b_str_02-1792_1196173   | Listeria_monocytogenes_L312_882094 | 0.9631 |
| Listeria_monocytogenes_serotype_4b_str_02-1289_1196172   | Listeria_monocytogenes_L312_882094 | 0.9631 |
| Listeria_monocytogenes_serotype_4b_str_02-1103_1196171   | Listeria_monocytogenes_L312_882094 | 0.9631 |
| Listeria_monocytogenes_serotype_3c_str_10-5027_1196195   | Listeria_monocytogenes_L312_882094 | 0.9329 |
| Listeria_monocytogenes_serotype_1_2c_str_10-5026_1196194 | Listeria_monocytogenes_L312_882094 | 0.934  |
| Listeria_monocytogenes_serotype_1_2c_str_10-5025_1196193 | Listeria_monocytogenes_L312_882094 | 0.934  |
| Listeria_monocytogenes_serotype_1_2b_str_10-0811_1196164 | Listeria_monocytogenes_L312_882094 | 0.9464 |
| Listeria_monocytogenes_serotype_1_2b_str_10-0810_1196163 | Listeria_monocytogenes_L312_882094 | 0.9464 |
| Listeria_monocytogenes_serotype_1_2a_str_99-6370_1196179 | Listeria_monocytogenes_L312_882094 | 0.9237 |
| Listeria_monocytogenes_serotype_1_2a_str_98-2035_1196178 | Listeria_monocytogenes_L312_882094 | 0.9237 |
| Listeria_monocytogenes_serotype_1_2a_str_95-0093_1196177 | Listeria_monocytogenes_L312_882094 | 0.9292 |
| Listeria_monocytogenes_serotype_1_2a_str_88-0478_1196176 | Listeria_monocytogenes_L312_882094 | 0.9284 |
| Listeria_monocytogenes_serotype_1_2a_str_10-5024_1196192 | Listeria_monocytogenes_L312_882094 | 0.9296 |
| Listeria_monocytogenes_serotype_1_2a_str_10-4758_1196168 | Listeria_monocytogenes_L312_882094 | 0.9441 |
| Listeria_monocytogenes_serotype_1_2a_str_10-4754_1196167 | Listeria_monocytogenes_L312_882094 | 0.9437 |
| Listeria_monocytogenes_serotype_1_2a_str_10-1321_1196191 | Listeria_monocytogenes_L312_882094 | 0.9296 |
| Listeria_monocytogenes_serotype_1_2a_str_10-1047_1196190 | Listeria_monocytogenes_L312_882094 | 0.9299 |
| Listeria_monocytogenes_serotype_1_2a_str_10-1046_1196189 | Listeria_monocytogenes_L312_882094 | 0.9299 |
| Listeria_monocytogenes_serotype_1_2a_str_10-0934_1196170 | Listeria_monocytogenes_L312_882094 | 0.9534 |
| Listeria_monocytogenes_serotype_1_2a_str_10-0933_1196169 | Listeria_monocytogenes_L312_882094 | 0.9534 |
| Listeria_monocytogenes_serotype_1_2a_str_10-0815_1196188 | Listeria_monocytogenes_L312_882094 | 0.9251 |
| Listeria_monocytogenes_serotype_1_2a_str_10-0814_1196187 | Listeria_monocytogenes_L312_882094 | 0.9296 |
| Listeria_monocytogenes_serotype_1_2a_str_10-0813_1196166 | Listeria_monocytogenes_L312_882094 | 0.9357 |
| Listeria_monocytogenes_serotype_1_2a_str_10-0812_1196165 | Listeria_monocytogenes_L312_882094 | 0.9357 |
| Listeria_monocytogenes_serotype_1_2a_str_08-7669_1196186 | Listeria_monocytogenes_L312_882094 | 0.9387 |
| Listeria_monocytogenes_serotype_1_2a_str_08-7374_1196185 | Listeria_monocytogenes_L312_882094 | 0.9296 |
| Listeria_monocytogenes_serotype_1_2a_str_08-6997_1196184 | Listeria_monocytogenes_L312_882094 | 0.9251 |
| Listeria_monocytogenes_serotype_1_2a_str_08-6569_1196183 | Listeria_monocytogenes_L312_882094 | 0.9251 |
| Listeria_monocytogenes_serotype_1_2a_str_08-6056_1196182 | Listeria_monocytogenes_L312_882094 | 0.9251 |
| Listeria_monocytogenes_serotype_1_2a_str_04-5457_1196181 | Listeria_monocytogenes_L312_882094 | 0.9296 |
| Listeria_monocytogenes_serotype_1_2a_str_02-5993_1196180 | Listeria_monocytogenes_L312_882094 | 0.9292 |
| Listeria_monocytogenes_R479a_1437838                     | Listeria_monocytogenes_L312_882094 | 0.9285 |
| Listeria_monocytogenes_N53-1_1234142                     | Listeria_monocytogenes_L312_882094 | 0.8984 |
| Listeria_monocytogenes_M7_1030009                        | Listeria_monocytogenes_L312_882094 | 0.9154 |
| Listeria_monocytogenes_LO28_393132                       | Listeria_monocytogenes_L312_882094 | 0.9322 |
| Listeria_monocytogenes_L99_563174                        | Listeria_monocytogenes_L312_882094 | 0.9161 |
| Listeria_monocytogenes_L312_882094                       | Listeria_monocytogenes_L312_882094 | 0.065  |
| Listeria_welshimeri_1643                                 | Listeria_monocytogenes_L99_563174  | 0.8657 |
| Listeria_welshimeri_serovar_6b_str_SLCC5334_386043       | Listeria_monocytogenes_L99_563174  | 0.865  |
| Listeria_seeligeri_serovar_1_2b_str_SLCC3954_683837      | Listeria_monocytogenes_L99_563174  | 0.8578 |
| Listeria_seeligeri_FSL_S4-171_702452                     | Listeria_monocytogenes_L99_563174  | 0.8083 |
| Listeria_seeligeri_FSL_N1-067_702453                     | Listeria_monocytogenes_L99_563174  | 0.8106 |
| Listeria_seeligeri_1640_v1                               | Listeria_monocytogenes_L99_563174  | 0.8527 |
| Listeria_seeligeri_1640                                  | Listeria_monocytogenes_L99_563174  | 0.8658 |
| Listeria_monocytogenes_WSLC1042_1457188                  | Listeria_monocytogenes_L99_563174  | 0.9045 |
| Listeria_monocytogenes_WSLC1001_1457187                  | Listeria_monocytogenes_L99_563174  | 0.912  |
| Listeria_monocytogenes_SLCC7179_879090                   | Listeria_monocytogenes_L99_563174  | 0.9093 |
| Listeria_monocytogenes_SLCC5850_882096                   | Listeria_monocytogenes_L99_563174  | 0.9134 |
| Listeria_monocytogenes_SLCC2755_932919                   | Listeria_monocytogenes_L99_563174  | 0.8953 |
| Listeria_monocytogenes_SLCC2540_879089                   | Listeria_monocytogenes_L99_563174  | 0.9108 |
| Listeria_monocytogenes_SLCC2479_882020                   | Listeria_monocytogenes_L99_563174  | 0.9082 |
| Listeria_monocytogenes_SLCC2378_879088                   | Listeria_monocytogenes_L99_563174  | 0.9059 |
| Listeria_monocytogenes_SLCC2376_882097                   | Listeria_monocytogenes_L99_563174  | 0.929  |
| Listeria_monocytogenes_SLCC2372_932920                   | Listeria_monocytogenes_L99_563174  | 0.9015 |
| Listeria_monocytogenes_serotype_4b_str_LL195_1230340     | Listeria_monocytogenes_L99_563174  | 0.9106 |
| Listeria_monocytogenes_serotype_4b_str_LIS0087_1134669   | Listeria_monocytogenes_L99_563174  | 0.8988 |
| Listeria_monocytogenes_serotype_4b_str_F2365_265669      | Listeria_monocytogenes_L99_563174  | 0.9106 |
| Listeria_monocytogenes_serotype_4b_str_CLIP_80459_568819 | Listeria_monocytogenes_L99_563174  | 0.9161 |
| Listeria_monocytogenes_serotype_4b_str_81-0861_1196161   | Listeria_monocytogenes_L99_563174  | 0.9092 |
| Listeria_monocytogenes_serotype_4b_str_81-0592_1196160   | Listeria_monocytogenes_L99_563174  | 0.9102 |
| Listeria_monocytogenes_serotype_4b_str_81-0558_1196159   | Listeria_monocytogenes_L99_563174  | 0.9109 |
| Listeria_monocytogenes_serotype_4b_str_10-0809_1196162   | Listeria_monocytogenes_L99_563174  | 0.9102 |
| Listeria_monocytogenes_serotype_4b_str_02-6680_1196175   | Listeria_monocytogenes_L99_563174  | 0.9099 |
| Listeria_monocytogenes_serotype_4b_str_02-6679_1196174   | Listeria_monocytogenes_L99_563174  | 0.9099 |
| Listeria_monocytogenes_serotype_4b_str_02-1792_1196173   | Listeria_monocytogenes_L99_563174  | 0.9113 |
| Listeria_monocytogenes_serotype_4b_str_02-1289_1196172   | Listeria_monocytogenes_L99_563174  | 0.9113 |
| Listeria_monocytogenes_serotype_4b_str_02-1103_1196171   | Listeria_monocytogenes_L99_563174  | 0.9113 |
| Listeria_monocytogenes_serotype_3c_str_10-5027_1196195   | Listeria_monocytogenes_L99_563174  | 0.9077 |
| Listeria_monocytogenes_serotype_1_2c_str_10-5026_1196194 | Listeria_monocytogenes_L99_563174  | 0.9081 |
| Listeria_monocytogenes_serotype_1_2c_str_10-5025_1196193 | Listeria_monocytogenes_L99_563174  | 0.9081 |
| Listeria_monocytogenes_serotype_1_2b_str_10-0811_1196164 | Listeria_monocytogenes_L99_563174  | 0.9155 |
| Listeria_monocytogenes_serotype_1_2b_str_10-0810_1196163 | Listeria_monocytogenes_L99_563174  | 0.9155 |
| Listeria_monocytogenes_serotype_1_2a_str_99-6370_1196179 | Listeria_monocytogenes_L99_563174  | 0.8969 |
| Listeria_monocytogenes_serotype_1_2a_str_98-2035_1196178 | Listeria_monocytogenes_L99_563174  | 0.8969 |
| Listeria_monocytogenes_serotype_1_2a_str_95-0093_1196177 | Listeria_monocytogenes_L99_563174  | 0.8989 |
| Listeria_monocytogenes_serotype_1_2a_str_88-0478_1196176 | Listeria_monocytogenes_L99_563174  | 0.8992 |
| Listeria_monocytogenes_serotype_1_2a_str_10-5024_1196192 | Listeria_monocytogenes_L99_563174  | 0.8999 |
| Listeria_monocytogenes_serotype_1_2a_str_10-4758_1196168 | Listeria_monocytogenes_L99_563174  | 0.9151 |
| Listeria_monocytogenes_serotype_1_2a_str_10-4754_1196167 | Listeria_monocytogenes_L99_563174  | 0.9151 |
| Listeria_monocytogenes_serotype_1_2a_str_10-1321_1196191 | Listeria_monocytogenes_L99_563174  | 0.8999 |
| Listeria_monocytogenes_serotype_1_2a_str_10-1047_1196190 | Listeria_monocytogenes_L99_563174  | 0.8999 |
| Listeria_monocytogenes_serotype_1_2a_str_10-1046_1196189 | Listeria_monocytogenes_L99_563174  | 0.8999 |
| Listeria_monocytogenes_serotype_1_2a_str_10-0934_1196170 | Listeria_monocytogenes_L99_563174  | 0.9087 |
| Listeria_monocytogenes_serotype_1_2a_str_10-0933_1196169 | Listeria_monocytogenes_L99_563174  | 0.9087 |
| Listeria_monocytogenes_serotype_1_2a_str_10-0815_1196188 | Listeria_monocytogenes_L99_563174  | 0.8968 |
| Listeria_monocytogenes_serotype_1_2a_str_10-0814_1196187 | Listeria_monocytogenes_L99_563174  | 0.9    |
| Listeria_monocytogenes_serotype_1_2a_str_10-0813_1196166 | Listeria_monocytogenes_L99_563174  | 0.9152 |
| Listeria_monocytogenes_serotype_1_2a_str_10-0812_1196165 | Listeria_monocytogenes_L99_563174  | 0.9152 |
| Listeria_monocytogenes_serotype_1_2a_str_08-7669_1196186 | Listeria_monocytogenes_L99_563174  | 0.896  |
| Listeria_monocytogenes_serotype_1_2a_str_08-7374_1196185 | Listeria_monocytogenes_L99_563174  | 0.8999 |



|                                                          |                                    |        |
|----------------------------------------------------------|------------------------------------|--------|
| Listeria_monocytogenes_serotype_1_2a_str_08-6997_1196184 | Listeria_monocytogenes_L99_563174  | 0.8968 |
| Listeria_monocytogenes_serotype_1_2a_str_08-6569_1196183 | Listeria_monocytogenes_L99_563174  | 0.8968 |
| Listeria_monocytogenes_serotype_1_2a_str_08-6056_1196182 | Listeria_monocytogenes_L99_563174  | 0.8968 |
| Listeria_monocytogenes_serotype_1_2a_str_04-5457_1196181 | Listeria_monocytogenes_L99_563174  | 0.8999 |
| Listeria_monocytogenes_serotype_1_2a_str_02-5993_1196180 | Listeria_monocytogenes_L99_563174  | 0.8996 |
| Listeria_monocytogenes_R479a_1437838                     | Listeria_monocytogenes_L99_563174  | 0.896  |
| Listeria_monocytogenes_N53-1_1234142                     | Listeria_monocytogenes_L99_563174  | 0.8683 |
| Listeria_monocytogenes_M7_1030009                        | Listeria_monocytogenes_L99_563174  | 0.9993 |
| Listeria_monocytogenes_LO28_393132                       | Listeria_monocytogenes_L99_563174  | 0.9123 |
| Listeria_monocytogenes_L99_563174                        | Listeria_monocytogenes_L99_563174  | 0.0659 |
| Listeria_welshimeri_1643                                 | Listeria_monocytogenes_LO28_393132 | 0.8675 |
| Listeria_welshimeri_serovar_6b_str_SLCC5334_386043       | Listeria_monocytogenes_LO28_393132 | 0.8672 |
| Listeria_seeligeri_serovar_1_2b_str_SLCC3954_683837      | Listeria_monocytogenes_LO28_393132 | 0.8729 |
| Listeria_seeligeri_FSL_S4-171_702452                     | Listeria_monocytogenes_LO28_393132 | 0.813  |
| Listeria_seeligeri_FSL_N1-067_702453                     | Listeria_monocytogenes_LO28_393132 | 0.8323 |
| Listeria_seeligeri_1640_v1                               | Listeria_monocytogenes_LO28_393132 | 0.8772 |
| Listeria_seeligeri_1640                                  | Listeria_monocytogenes_LO28_393132 | 0.8755 |
| Listeria_monocytogenes_WSLC1042_1457188                  | Listeria_monocytogenes_LO28_393132 | 0.9242 |
| Listeria_monocytogenes_WSLC1001_1457187                  | Listeria_monocytogenes_LO28_393132 | 0.9593 |
| Listeria_monocytogenes_SLCC7179_879090                   | Listeria_monocytogenes_LO28_393132 | 0.9544 |
| Listeria_monocytogenes_SLCC5850_882096                   | Listeria_monocytogenes_LO28_393132 | 0.9531 |
| Listeria_monocytogenes_SLCC2755_932919                   | Listeria_monocytogenes_LO28_393132 | 0.9214 |
| Listeria_monocytogenes_SLCC2540_879089                   | Listeria_monocytogenes_LO28_393132 | 0.9417 |
| Listeria_monocytogenes_SLCC2479_882020                   | Listeria_monocytogenes_LO28_393132 | 0.9878 |
| Listeria_monocytogenes_SLCC2378_879088                   | Listeria_monocytogenes_LO28_393132 | 0.9252 |
| Listeria_monocytogenes_SLCC2376_882097                   | Listeria_monocytogenes_LO28_393132 | 0.9312 |
| Listeria_monocytogenes_SLCC2372_932920                   | Listeria_monocytogenes_LO28_393132 | 0.9794 |
| Listeria_monocytogenes_serotype_4b_str_LL195_1230340     | Listeria_monocytogenes_LO28_393132 | 0.9297 |
| Listeria_monocytogenes_serotype_4b_str_LIS0087_1134669   | Listeria_monocytogenes_LO28_393132 | 0.9439 |
| Listeria_monocytogenes_serotype_4b_str_F2365_265669      | Listeria_monocytogenes_LO28_393132 | 0.9297 |
| Listeria_monocytogenes_serotype_4b_str_CLIP_80459_568819 | Listeria_monocytogenes_LO28_393132 | 0.9322 |
| Listeria_monocytogenes_serotype_4b_str_81-0861_1196161   | Listeria_monocytogenes_LO28_393132 | 0.9272 |
| Listeria_monocytogenes_serotype_4b_str_81-0592_1196160   | Listeria_monocytogenes_LO28_393132 | 0.9282 |
| Listeria_monocytogenes_serotype_4b_str_81-0558_1196159   | Listeria_monocytogenes_LO28_393132 | 0.9286 |
| Listeria_monocytogenes_serotype_4b_str_10-0809_1196162   | Listeria_monocytogenes_LO28_393132 | 0.9282 |
| Listeria_monocytogenes_serotype_4b_str_02-6680_1196175   | Listeria_monocytogenes_LO28_393132 | 0.9294 |
| Listeria_monocytogenes_serotype_4b_str_02-6679_1196174   | Listeria_monocytogenes_LO28_393132 | 0.9294 |
| Listeria_monocytogenes_serotype_4b_str_02-1792_1196173   | Listeria_monocytogenes_LO28_393132 | 0.9297 |
| Listeria_monocytogenes_serotype_4b_str_02-1289_1196172   | Listeria_monocytogenes_LO28_393132 | 0.9297 |
| Listeria_monocytogenes_serotype_4b_str_02-1103_1196171   | Listeria_monocytogenes_LO28_393132 | 0.9297 |
| Listeria_monocytogenes_serotype_3c_str_10-5027_1196195   | Listeria_monocytogenes_LO28_393132 | 0.9811 |
| Listeria_monocytogenes_serotype_1_2c_str_10-5026_1196194 | Listeria_monocytogenes_LO28_393132 | 0.9822 |
| Listeria_monocytogenes_serotype_1_2c_str_10-5025_1196193 | Listeria_monocytogenes_LO28_393132 | 0.9822 |
| Listeria_monocytogenes_serotype_1_2b_str_10-0811_1196164 | Listeria_monocytogenes_LO28_393132 | 0.9457 |
| Listeria_monocytogenes_serotype_1_2b_str_10-0810_1196163 | Listeria_monocytogenes_LO28_393132 | 0.9457 |
| Listeria_monocytogenes_serotype_1_2a_str_99-6370_1196179 | Listeria_monocytogenes_LO28_393132 | 0.9384 |
| Listeria_monocytogenes_serotype_1_2a_str_98-2035_1196178 | Listeria_monocytogenes_LO28_393132 | 0.9384 |
| Listeria_monocytogenes_serotype_1_2a_str_95-0093_1196177 | Listeria_monocytogenes_LO28_393132 | 0.9447 |
| Listeria_monocytogenes_serotype_1_2a_str_88-0478_1196176 | Listeria_monocytogenes_LO28_393132 | 0.9454 |
| Listeria_monocytogenes_serotype_1_2a_str_10-5024_1196192 | Listeria_monocytogenes_LO28_393132 | 0.944  |
| Listeria_monocytogenes_serotype_1_2a_str_10-4758_1196168 | Listeria_monocytogenes_LO28_393132 | 0.9569 |
| Listeria_monocytogenes_serotype_1_2a_str_10-4754_1196167 | Listeria_monocytogenes_LO28_393132 | 0.9573 |
| Listeria_monocytogenes_serotype_1_2a_str_10-1321_1196191 | Listeria_monocytogenes_LO28_393132 | 0.944  |
| Listeria_monocytogenes_serotype_1_2a_str_10-1047_1196190 | Listeria_monocytogenes_LO28_393132 | 0.9439 |
| Listeria_monocytogenes_serotype_1_2a_str_10-1046_1196189 | Listeria_monocytogenes_LO28_393132 | 0.9439 |
| Listeria_monocytogenes_serotype_1_2a_str_10-0934_1196170 | Listeria_monocytogenes_LO28_393132 | 0.9548 |
| Listeria_monocytogenes_serotype_1_2a_str_10-0933_1196169 | Listeria_monocytogenes_LO28_393132 | 0.9548 |
| Listeria_monocytogenes_serotype_1_2a_str_10-0815_1196188 | Listeria_monocytogenes_LO28_393132 | 0.9394 |
| Listeria_monocytogenes_serotype_1_2a_str_10-0814_1196187 | Listeria_monocytogenes_LO28_393132 | 0.944  |
| Listeria_monocytogenes_serotype_1_2a_str_10-0813_1196166 | Listeria_monocytogenes_LO28_393132 | 0.9586 |
| Listeria_monocytogenes_serotype_1_2a_str_10-0812_1196165 | Listeria_monocytogenes_LO28_393132 | 0.9586 |
| Listeria_monocytogenes_serotype_1_2a_str_08-7669_1196186 | Listeria_monocytogenes_LO28_393132 | 0.9408 |
| Listeria_monocytogenes_serotype_1_2a_str_08-7374_1196185 | Listeria_monocytogenes_LO28_393132 | 0.944  |
| Listeria_monocytogenes_serotype_1_2a_str_08-6997_1196184 | Listeria_monocytogenes_LO28_393132 | 0.9394 |
| Listeria_monocytogenes_serotype_1_2a_str_08-6569_1196183 | Listeria_monocytogenes_LO28_393132 | 0.9394 |
| Listeria_monocytogenes_serotype_1_2a_str_08-6056_1196182 | Listeria_monocytogenes_LO28_393132 | 0.9394 |
| Listeria_monocytogenes_serotype_1_2a_str_04-5457_1196181 | Listeria_monocytogenes_LO28_393132 | 0.944  |
| Listeria_monocytogenes_serotype_1_2a_str_02-5993_1196180 | Listeria_monocytogenes_LO28_393132 | 0.944  |
| Listeria_monocytogenes_R479a_1437838                     | Listeria_monocytogenes_LO28_393132 | 0.9469 |
| Listeria_monocytogenes_N53-1_1234142                     | Listeria_monocytogenes_LO28_393132 | 0.9084 |
| Listeria_monocytogenes_M7_1030009                        | Listeria_monocytogenes_LO28_393132 | 0.912  |
| Listeria_monocytogenes_LO28_393132                       | Listeria_monocytogenes_LO28_393132 | 0.0686 |
| Listeria_welshimeri_1643                                 | Listeria_monocytogenes_M7_1030009  | 0.865  |
| Listeria_welshimeri_serovar_6b_str_SLCC5334_386043       | Listeria_monocytogenes_M7_1030009  | 0.8647 |
| Listeria_seeligeri_serovar_1_2b_str_SLCC3954_683837      | Listeria_monocytogenes_M7_1030009  | 0.8575 |
| Listeria_seeligeri_FSL_S4-171_702452                     | Listeria_monocytogenes_M7_1030009  | 0.8077 |
| Listeria_seeligeri_FSL_N1-067_702453                     | Listeria_monocytogenes_M7_1030009  | 0.8103 |
| Listeria_seeligeri_1640_v1                               | Listeria_monocytogenes_M7_1030009  | 0.8524 |
| Listeria_seeligeri_1640                                  | Listeria_monocytogenes_M7_1030009  | 0.8652 |
| Listeria_monocytogenes_WSLC1042_1457188                  | Listeria_monocytogenes_M7_1030009  | 0.9042 |
| Listeria_monocytogenes_WSLC1001_1457187                  | Listeria_monocytogenes_M7_1030009  | 0.9113 |
| Listeria_monocytogenes_SLCC7179_879090                   | Listeria_monocytogenes_M7_1030009  | 0.9086 |
| Listeria_monocytogenes_SLCC5850_882096                   | Listeria_monocytogenes_M7_1030009  | 0.9128 |
| Listeria_monocytogenes_SLCC2755_932919                   | Listeria_monocytogenes_M7_1030009  | 0.8946 |
| Listeria_monocytogenes_SLCC2540_879089                   | Listeria_monocytogenes_M7_1030009  | 0.9101 |
| Listeria_monocytogenes_SLCC2479_882020                   | Listeria_monocytogenes_M7_1030009  | 0.9078 |
| Listeria_monocytogenes_SLCC2378_879088                   | Listeria_monocytogenes_M7_1030009  | 0.9052 |
| Listeria_monocytogenes_SLCC2376_882097                   | Listeria_monocytogenes_M7_1030009  | 0.9286 |
| Listeria_monocytogenes_SLCC2372_932920                   | Listeria_monocytogenes_M7_1030009  | 0.9012 |
| Listeria_monocytogenes_serotype_4b_str_LL195_1230340     | Listeria_monocytogenes_M7_1030009  | 0.9099 |
| Listeria_monocytogenes_serotype_4b_str_LIS0087_1134669   | Listeria_monocytogenes_M7_1030009  | 0.8984 |



|                                                          |                                      |        |
|----------------------------------------------------------|--------------------------------------|--------|
| Listeria_monocytogenes_serotype_4b_str_F2365_265669      | Listeria_monocytogenes_M7_1030009    | 0.9099 |
| Listeria_monocytogenes_serotype_4b_str_CLIP_80459_568819 | Listeria_monocytogenes_M7_1030009    | 0.9154 |
| Listeria_monocytogenes_serotype_4b_str_81-0861_1196161   | Listeria_monocytogenes_M7_1030009    | 0.9088 |
| Listeria_monocytogenes_serotype_4b_str_81-0592_1196160   | Listeria_monocytogenes_M7_1030009    | 0.9099 |
| Listeria_monocytogenes_serotype_4b_str_81-0558_1196159   | Listeria_monocytogenes_M7_1030009    | 0.9102 |
| Listeria_monocytogenes_serotype_4b_str_10-0809_1196162   | Listeria_monocytogenes_M7_1030009    | 0.9099 |
| Listeria_monocytogenes_serotype_4b_str_02-6680_1196175   | Listeria_monocytogenes_M7_1030009    | 0.9096 |
| Listeria_monocytogenes_serotype_4b_str_02-6679_1196174   | Listeria_monocytogenes_M7_1030009    | 0.9096 |
| Listeria_monocytogenes_serotype_4b_str_02-1792_1196173   | Listeria_monocytogenes_M7_1030009    | 0.9106 |
| Listeria_monocytogenes_serotype_4b_str_02-1289_1196172   | Listeria_monocytogenes_M7_1030009    | 0.9106 |
| Listeria_monocytogenes_serotype_4b_str_02-1103_1196171   | Listeria_monocytogenes_M7_1030009    | 0.9106 |
| Listeria_monocytogenes_serotype_3c_str_10-5027_1196195   | Listeria_monocytogenes_M7_1030009    | 0.9074 |
| Listeria_monocytogenes_serotype_1_2c_str_10-5026_1196194 | Listeria_monocytogenes_M7_1030009    | 0.9074 |
| Listeria_monocytogenes_serotype_1_2c_str_10-5025_1196193 | Listeria_monocytogenes_M7_1030009    | 0.9074 |
| Listeria_monocytogenes_serotype_1_2b_str_10-0811_1196164 | Listeria_monocytogenes_M7_1030009    | 0.9152 |
| Listeria_monocytogenes_serotype_1_2b_str_10-0810_1196163 | Listeria_monocytogenes_M7_1030009    | 0.9155 |
| Listeria_monocytogenes_serotype_1_2a_str_99-6370_1196179 | Listeria_monocytogenes_M7_1030009    | 0.8966 |
| Listeria_monocytogenes_serotype_1_2a_str_98-2035_1196178 | Listeria_monocytogenes_M7_1030009    | 0.8966 |
| Listeria_monocytogenes_serotype_1_2a_str_95-0093_1196177 | Listeria_monocytogenes_M7_1030009    | 0.8985 |
| Listeria_monocytogenes_serotype_1_2a_str_88-0478_1196176 | Listeria_monocytogenes_M7_1030009    | 0.8985 |
| Listeria_monocytogenes_serotype_1_2a_str_10-5024_1196192 | Listeria_monocytogenes_M7_1030009    | 0.8993 |
| Listeria_monocytogenes_serotype_1_2a_str_10-4758_1196168 | Listeria_monocytogenes_M7_1030009    | 0.9144 |
| Listeria_monocytogenes_serotype_1_2a_str_10-4754_1196167 | Listeria_monocytogenes_M7_1030009    | 0.9147 |
| Listeria_monocytogenes_serotype_1_2a_str_10-1321_1196191 | Listeria_monocytogenes_M7_1030009    | 0.8993 |
| Listeria_monocytogenes_serotype_1_2a_str_10-1047_1196190 | Listeria_monocytogenes_M7_1030009    | 0.8996 |
| Listeria_monocytogenes_serotype_1_2a_str_10-1046_1196189 | Listeria_monocytogenes_M7_1030009    | 0.8996 |
| Listeria_monocytogenes_serotype_1_2a_str_10-0934_1196170 | Listeria_monocytogenes_M7_1030009    | 0.9083 |
| Listeria_monocytogenes_serotype_1_2a_str_10-0933_1196169 | Listeria_monocytogenes_M7_1030009    | 0.9083 |
| Listeria_monocytogenes_serotype_1_2a_str_10-0815_1196188 | Listeria_monocytogenes_M7_1030009    | 0.8965 |
| Listeria_monocytogenes_serotype_1_2a_str_10-0814_1196187 | Listeria_monocytogenes_M7_1030009    | 0.8996 |
| Listeria_monocytogenes_serotype_1_2a_str_10-0813_1196166 | Listeria_monocytogenes_M7_1030009    | 0.9149 |
| Listeria_monocytogenes_serotype_1_2a_str_10-0812_1196165 | Listeria_monocytogenes_M7_1030009    | 0.9149 |
| Listeria_monocytogenes_serotype_1_2a_str_08-7669_1196186 | Listeria_monocytogenes_M7_1030009    | 0.8956 |
| Listeria_monocytogenes_serotype_1_2a_str_08-7374_1196185 | Listeria_monocytogenes_M7_1030009    | 0.8993 |
| Listeria_monocytogenes_serotype_1_2a_str_08-6997_1196184 | Listeria_monocytogenes_M7_1030009    | 0.8965 |
| Listeria_monocytogenes_serotype_1_2a_str_08-6569_1196183 | Listeria_monocytogenes_M7_1030009    | 0.8965 |
| Listeria_monocytogenes_serotype_1_2a_str_08-6056_1196182 | Listeria_monocytogenes_M7_1030009    | 0.8965 |
| Listeria_monocytogenes_serotype_1_2a_str_04-5457_1196181 | Listeria_monocytogenes_M7_1030009    | 0.8993 |
| Listeria_monocytogenes_serotype_1_2a_str_02-5993_1196180 | Listeria_monocytogenes_M7_1030009    | 0.8993 |
| Listeria_monocytogenes_N479a_1437838                     | Listeria_monocytogenes_M7_1030009    | 0.8957 |
| Listeria_monocytogenes_N53-1_1234142                     | Listeria_monocytogenes_M7_1030009    | 0.868  |
| Listeria_monocytogenes_M7_1030009                        | Listeria_monocytogenes_M7_1030009    | 0.0666 |
| Listeria_welshimeri_1643                                 | Listeria_monocytogenes_N53-1_1234142 | 0.833  |
| Listeria_welshimeri_serovar_6b_str_SLCC5334_386043       | Listeria_monocytogenes_N53-1_1234142 | 0.8327 |
| Listeria_seeligeri_serovar_1_2b_str_SLCC3954_683837      | Listeria_monocytogenes_N53-1_1234142 | 0.8435 |
| Listeria_seeligeri_FSL_S4-171_702452                     | Listeria_monocytogenes_N53-1_1234142 | 0.7827 |
| Listeria_seeligeri_FSL_N1-067_702453                     | Listeria_monocytogenes_N53-1_1234142 | 0.7907 |
| Listeria_seeligeri_1640_v1                               | Listeria_monocytogenes_N53-1_1234142 | 0.8434 |
| Listeria_seeligeri_1640                                  | Listeria_monocytogenes_N53-1_1234142 | 0.8408 |
| Listeria_monocytogenes_WSLC1042_1457188                  | Listeria_monocytogenes_N53-1_1234142 | 0.8912 |
| Listeria_monocytogenes_WSLC1001_1457187                  | Listeria_monocytogenes_N53-1_1234142 | 0.904  |
| Listeria_monocytogenes_SLCC7179_879090                   | Listeria_monocytogenes_N53-1_1234142 | 0.9179 |
| Listeria_monocytogenes_SLCC5850_882096                   | Listeria_monocytogenes_N53-1_1234142 | 0.9076 |
| Listeria_monocytogenes_SLCC2755_932919                   | Listeria_monocytogenes_N53-1_1234142 | 0.8876 |
| Listeria_monocytogenes_SLCC2540_879089                   | Listeria_monocytogenes_N53-1_1234142 | 0.8923 |
| Listeria_monocytogenes_SLCC2479_882020                   | Listeria_monocytogenes_N53-1_1234142 | 0.9061 |
| Listeria_monocytogenes_SLCC2378_879088                   | Listeria_monocytogenes_N53-1_1234142 | 0.8914 |
| Listeria_monocytogenes_SLCC2376_882097                   | Listeria_monocytogenes_N53-1_1234142 | 0.8985 |
| Listeria_monocytogenes_SLCC2372_932920                   | Listeria_monocytogenes_N53-1_1234142 | 0.8989 |
| Listeria_monocytogenes_serotype_4b_str_LL195_1230340     | Listeria_monocytogenes_N53-1_1234142 | 0.8966 |
| Listeria_monocytogenes_serotype_4b_str_LIS0087_1134669   | Listeria_monocytogenes_N53-1_1234142 | 0.892  |
| Listeria_monocytogenes_serotype_4b_str_F2365_265669      | Listeria_monocytogenes_N53-1_1234142 | 0.8966 |
| Listeria_monocytogenes_serotype_4b_str_CLIP_80459_568819 | Listeria_monocytogenes_N53-1_1234142 | 0.8984 |
| Listeria_monocytogenes_serotype_4b_str_81-0861_1196161   | Listeria_monocytogenes_N53-1_1234142 | 0.8882 |
| Listeria_monocytogenes_serotype_4b_str_81-0592_1196160   | Listeria_monocytogenes_N53-1_1234142 | 0.8888 |
| Listeria_monocytogenes_serotype_4b_str_81-0558_1196159   | Listeria_monocytogenes_N53-1_1234142 | 0.8895 |
| Listeria_monocytogenes_serotype_4b_str_10-0809_1196162   | Listeria_monocytogenes_N53-1_1234142 | 0.8892 |
| Listeria_monocytogenes_serotype_4b_str_02-6680_1196175   | Listeria_monocytogenes_N53-1_1234142 | 0.8971 |
| Listeria_monocytogenes_serotype_4b_str_02-6679_1196174   | Listeria_monocytogenes_N53-1_1234142 | 0.8971 |
| Listeria_monocytogenes_serotype_4b_str_02-1792_1196173   | Listeria_monocytogenes_N53-1_1234142 | 0.8888 |
| Listeria_monocytogenes_serotype_4b_str_02-1289_1196172   | Listeria_monocytogenes_N53-1_1234142 | 0.8888 |
| Listeria_monocytogenes_serotype_4b_str_02-1103_1196171   | Listeria_monocytogenes_N53-1_1234142 | 0.8888 |
| Listeria_monocytogenes_serotype_3c_str_10-5027_1196195   | Listeria_monocytogenes_N53-1_1234142 | 0.905  |
| Listeria_monocytogenes_serotype_1_2c_str_10-5026_1196194 | Listeria_monocytogenes_N53-1_1234142 | 0.9057 |
| Listeria_monocytogenes_serotype_1_2c_str_10-5025_1196193 | Listeria_monocytogenes_N53-1_1234142 | 0.9057 |
| Listeria_monocytogenes_serotype_1_2b_str_10-0811_1196164 | Listeria_monocytogenes_N53-1_1234142 | 0.8917 |
| Listeria_monocytogenes_serotype_1_2b_str_10-0810_1196163 | Listeria_monocytogenes_N53-1_1234142 | 0.8917 |
| Listeria_monocytogenes_serotype_1_2a_str_99-6370_1196179 | Listeria_monocytogenes_N53-1_1234142 | 0.8883 |
| Listeria_monocytogenes_serotype_1_2a_str_98-2035_1196178 | Listeria_monocytogenes_N53-1_1234142 | 0.8883 |
| Listeria_monocytogenes_serotype_1_2a_str_95-0093_1196177 | Listeria_monocytogenes_N53-1_1234142 | 0.8937 |
| Listeria_monocytogenes_serotype_1_2a_str_88-0478_1196176 | Listeria_monocytogenes_N53-1_1234142 | 0.8926 |
| Listeria_monocytogenes_serotype_1_2a_str_10-5024_1196192 | Listeria_monocytogenes_N53-1_1234142 | 0.8937 |
| Listeria_monocytogenes_serotype_1_2a_str_10-4758_1196168 | Listeria_monocytogenes_N53-1_1234142 | 0.9089 |
| Listeria_monocytogenes_serotype_1_2a_str_10-4754_1196167 | Listeria_monocytogenes_N53-1_1234142 | 0.9088 |
| Listeria_monocytogenes_serotype_1_2a_str_10-1321_1196191 | Listeria_monocytogenes_N53-1_1234142 | 0.8937 |
| Listeria_monocytogenes_serotype_1_2a_str_10-1047_1196190 | Listeria_monocytogenes_N53-1_1234142 | 0.8944 |
| Listeria_monocytogenes_serotype_1_2a_str_10-1046_1196189 | Listeria_monocytogenes_N53-1_1234142 | 0.8944 |
| Listeria_monocytogenes_serotype_1_2a_str_10-0934_1196170 | Listeria_monocytogenes_N53-1_1234142 | 0.9188 |
| Listeria_monocytogenes_serotype_1_2a_str_10-0933_1196169 | Listeria_monocytogenes_N53-1_1234142 | 0.9188 |
| Listeria_monocytogenes_serotype_1_2a_str_10-0815_1196188 | Listeria_monocytogenes_N53-1_1234142 | 0.8896 |
| Listeria_monocytogenes_serotype_1_2a_str_10-0814_1196187 | Listeria_monocytogenes_N53-1_1234142 | 0.893  |

|                                                          |                                                          |        |
|----------------------------------------------------------|----------------------------------------------------------|--------|
| Listeria_monocytogenes_serotype_1_2a_str_10-0813_1196166 | Listeria_monocytogenes_N53-1_1234142                     | 0.9087 |
| Listeria_monocytogenes_serotype_1_2a_str_10-0812_1196165 | Listeria_monocytogenes_N53-1_1234142                     | 0.9087 |
| Listeria_monocytogenes_serotype_1_2a_str_08-7669_1196186 | Listeria_monocytogenes_N53-1_1234142                     | 0.9028 |
| Listeria_monocytogenes_serotype_1_2a_str_08-7374_1196185 | Listeria_monocytogenes_N53-1_1234142                     | 0.8937 |
| Listeria_monocytogenes_serotype_1_2a_str_08-6997_1196184 | Listeria_monocytogenes_N53-1_1234142                     | 0.8896 |
| Listeria_monocytogenes_serotype_1_2a_str_08-6569_1196183 | Listeria_monocytogenes_N53-1_1234142                     | 0.8896 |
| Listeria_monocytogenes_serotype_1_2a_str_08-6056_1196182 | Listeria_monocytogenes_N53-1_1234142                     | 0.8896 |
| Listeria_monocytogenes_serotype_1_2a_str_04-5457_1196181 | Listeria_monocytogenes_N53-1_1234142                     | 0.8937 |
| Listeria_monocytogenes_serotype_1_2a_str_02-5993_1196180 | Listeria_monocytogenes_N53-1_1234142                     | 0.8937 |
| Listeria_monocytogenes_R479a_1437838                     | Listeria_monocytogenes_N53-1_1234142                     | 0.8909 |
| Listeria_monocytogenes_N53-1_1234142                     | Listeria_monocytogenes_N53-1_1234142                     | 0.1331 |
| Listeria_welshimeri_1643                                 | Listeria_monocytogenes_R479a_1437838                     | 0.8642 |
| Listeria_welshimeri_serovar_6b_str_SLCC5334_386043       | Listeria_monocytogenes_R479a_1437838                     | 0.8639 |
| Listeria_seeligeri_serovar_1_2b_str_SLCC3954_683837      | Listeria_monocytogenes_R479a_1437838                     | 0.8692 |
| Listeria_seeligeri_FSL_S4-171_702452                     | Listeria_monocytogenes_R479a_1437838                     | 0.8106 |
| Listeria_seeligeri_FSL_N1-067_702453                     | Listeria_monocytogenes_R479a_1437838                     | 0.8374 |
| Listeria_seeligeri_1640_v1                               | Listeria_monocytogenes_R479a_1437838                     | 0.8677 |
| Listeria_seeligeri_1640                                  | Listeria_monocytogenes_R479a_1437838                     | 0.8643 |
| Listeria_monocytogenes_WSLC1042_1457188                  | Listeria_monocytogenes_R479a_1437838                     | 0.9157 |
| Listeria_monocytogenes_WSLC1001_1457187                  | Listeria_monocytogenes_R479a_1437838                     | 0.9491 |
| Listeria_monocytogenes_SLCC7179_879090                   | Listeria_monocytogenes_R479a_1437838                     | 0.9442 |
| Listeria_monocytogenes_SLCC5850_882096                   | Listeria_monocytogenes_R479a_1437838                     | 0.9496 |
| Listeria_monocytogenes_SLCC2755_932919                   | Listeria_monocytogenes_R479a_1437838                     | 0.923  |
| Listeria_monocytogenes_SLCC2540_879089                   | Listeria_monocytogenes_R479a_1437838                     | 0.9331 |
| Listeria_monocytogenes_SLCC2479_882020                   | Listeria_monocytogenes_R479a_1437838                     | 0.9513 |
| Listeria_monocytogenes_SLCC2378_879088                   | Listeria_monocytogenes_R479a_1437838                     | 0.9167 |
| Listeria_monocytogenes_SLCC2376_882097                   | Listeria_monocytogenes_R479a_1437838                     | 0.9213 |
| Listeria_monocytogenes_SLCC2372_932920                   | Listeria_monocytogenes_R479a_1437838                     | 0.9517 |
| Listeria_monocytogenes_serotype_4b_str_LL195_1230340     | Listeria_monocytogenes_R479a_1437838                     | 0.9218 |
| Listeria_monocytogenes_serotype_4b_str_LIS0087_1134669   | Listeria_monocytogenes_R479a_1437838                     | 0.9296 |
| Listeria_monocytogenes_serotype_4b_str_F2365_265669      | Listeria_monocytogenes_R479a_1437838                     | 0.9218 |
| Listeria_monocytogenes_serotype_4b_str_CLIP_80459_568819 | Listeria_monocytogenes_R479a_1437838                     | 0.9285 |
| Listeria_monocytogenes_serotype_4b_str_81-0861_1196161   | Listeria_monocytogenes_R479a_1437838                     | 0.9121 |
| Listeria_monocytogenes_serotype_4b_str_81-0592_1196160   | Listeria_monocytogenes_R479a_1437838                     | 0.9131 |
| Listeria_monocytogenes_serotype_4b_str_81-0558_1196159   | Listeria_monocytogenes_R479a_1437838                     | 0.9135 |
| Listeria_monocytogenes_serotype_4b_str_10-0809_1196162   | Listeria_monocytogenes_R479a_1437838                     | 0.9131 |
| Listeria_monocytogenes_serotype_4b_str_02-6680_1196175   | Listeria_monocytogenes_R479a_1437838                     | 0.9253 |
| Listeria_monocytogenes_serotype_4b_str_02-6679_1196174   | Listeria_monocytogenes_R479a_1437838                     | 0.9253 |
| Listeria_monocytogenes_serotype_4b_str_02-1792_1196173   | Listeria_monocytogenes_R479a_1437838                     | 0.9139 |
| Listeria_monocytogenes_serotype_4b_str_02-1289_1196172   | Listeria_monocytogenes_R479a_1437838                     | 0.9139 |
| Listeria_monocytogenes_serotype_4b_str_02-1103_1196171   | Listeria_monocytogenes_R479a_1437838                     | 0.9139 |
| Listeria_monocytogenes_serotype_3c_str_10-5027_1196195   | Listeria_monocytogenes_R479a_1437838                     | 0.9575 |
| Listeria_monocytogenes_serotype_1_2c_str_10-5026_1196194 | Listeria_monocytogenes_R479a_1437838                     | 0.9583 |
| Listeria_monocytogenes_serotype_1_2c_str_10-5025_1196193 | Listeria_monocytogenes_R479a_1437838                     | 0.9583 |
| Listeria_monocytogenes_serotype_1_2b_str_10-0811_1196164 | Listeria_monocytogenes_R479a_1437838                     | 0.9342 |
| Listeria_monocytogenes_serotype_1_2b_str_10-0810_1196163 | Listeria_monocytogenes_R479a_1437838                     | 0.9342 |
| Listeria_monocytogenes_serotype_1_2a_str_99-6370_1196179 | Listeria_monocytogenes_R479a_1437838                     | 0.9621 |
| Listeria_monocytogenes_serotype_1_2a_str_98-2035_1196178 | Listeria_monocytogenes_R479a_1437838                     | 0.9621 |
| Listeria_monocytogenes_serotype_1_2a_str_95-0093_1196177 | Listeria_monocytogenes_R479a_1437838                     | 0.9674 |
| Listeria_monocytogenes_serotype_1_2a_str_88-0478_1196176 | Listeria_monocytogenes_R479a_1437838                     | 0.967  |
| Listeria_monocytogenes_serotype_1_2a_str_10-5024_1196192 | Listeria_monocytogenes_R479a_1437838                     | 0.9677 |
| Listeria_monocytogenes_serotype_1_2a_str_10-4758_1196168 | Listeria_monocytogenes_R479a_1437838                     | 0.9475 |
| Listeria_monocytogenes_serotype_1_2a_str_10-4754_1196167 | Listeria_monocytogenes_R479a_1437838                     | 0.9478 |
| Listeria_monocytogenes_serotype_1_2a_str_10-1321_1196191 | Listeria_monocytogenes_R479a_1437838                     | 0.9677 |
| Listeria_monocytogenes_serotype_1_2a_str_10-1047_1196190 | Listeria_monocytogenes_R479a_1437838                     | 0.9707 |
| Listeria_monocytogenes_serotype_1_2a_str_10-1046_1196189 | Listeria_monocytogenes_R479a_1437838                     | 0.9707 |
| Listeria_monocytogenes_serotype_1_2a_str_10-0934_1196170 | Listeria_monocytogenes_R479a_1437838                     | 0.9487 |
| Listeria_monocytogenes_serotype_1_2a_str_10-0933_1196169 | Listeria_monocytogenes_R479a_1437838                     | 0.9487 |
| Listeria_monocytogenes_serotype_1_2a_str_10-0815_1196188 | Listeria_monocytogenes_R479a_1437838                     | 0.9632 |
| Listeria_monocytogenes_serotype_1_2a_str_10-0814_1196187 | Listeria_monocytogenes_R479a_1437838                     | 0.9677 |
| Listeria_monocytogenes_serotype_1_2a_str_10-0813_1196166 | Listeria_monocytogenes_R479a_1437838                     | 0.9533 |
| Listeria_monocytogenes_serotype_1_2a_str_10-0812_1196165 | Listeria_monocytogenes_R479a_1437838                     | 0.9533 |
| Listeria_monocytogenes_serotype_1_2a_str_08-7669_1196186 | Listeria_monocytogenes_R479a_1437838                     | 0.9619 |
| Listeria_monocytogenes_serotype_1_2a_str_08-7374_1196185 | Listeria_monocytogenes_R479a_1437838                     | 0.9677 |
| Listeria_monocytogenes_serotype_1_2a_str_08-6997_1196184 | Listeria_monocytogenes_R479a_1437838                     | 0.9632 |
| Listeria_monocytogenes_serotype_1_2a_str_08-6569_1196183 | Listeria_monocytogenes_R479a_1437838                     | 0.9632 |
| Listeria_monocytogenes_serotype_1_2a_str_08-6056_1196182 | Listeria_monocytogenes_R479a_1437838                     | 0.9632 |
| Listeria_monocytogenes_serotype_1_2a_str_04-5457_1196181 | Listeria_monocytogenes_R479a_1437838                     | 0.9677 |
| Listeria_monocytogenes_serotype_1_2a_str_02-5993_1196180 | Listeria_monocytogenes_R479a_1437838                     | 0.9677 |
| Listeria_monocytogenes_R479a_1437838                     | Listeria_monocytogenes_R479a_1437838                     | 0.0718 |
| Listeria_welshimeri_1643                                 | Listeria_monocytogenes_serotype_1_2a_str_02-5993_1196180 | 0.8641 |
| Listeria_welshimeri_serovar_6b_str_SLCC5334_386043       | Listeria_monocytogenes_serotype_1_2a_str_02-5993_1196180 | 0.8638 |
| Listeria_seeligeri_serovar_1_2b_str_SLCC3954_683837      | Listeria_monocytogenes_serotype_1_2a_str_02-5993_1196180 | 0.8702 |
| Listeria_seeligeri_FSL_S4-171_702452                     | Listeria_monocytogenes_serotype_1_2a_str_02-5993_1196180 | 0.8105 |
| Listeria_seeligeri_FSL_N1-067_702453                     | Listeria_monocytogenes_serotype_1_2a_str_02-5993_1196180 | 0.8321 |
| Listeria_seeligeri_1640_v1                               | Listeria_monocytogenes_serotype_1_2a_str_02-5993_1196180 | 0.8676 |
| Listeria_seeligeri_1640                                  | Listeria_monocytogenes_serotype_1_2a_str_02-5993_1196180 | 0.865  |
| Listeria_monocytogenes_WSLC1042_1457188                  | Listeria_monocytogenes_serotype_1_2a_str_02-5993_1196180 | 0.9164 |
| Listeria_monocytogenes_WSLC1001_1457187                  | Listeria_monocytogenes_serotype_1_2a_str_02-5993_1196180 | 0.9517 |
| Listeria_monocytogenes_SLCC7179_879090                   | Listeria_monocytogenes_serotype_1_2a_str_02-5993_1196180 | 0.9482 |
| Listeria_monocytogenes_SLCC5850_882096                   | Listeria_monocytogenes_serotype_1_2a_str_02-5993_1196180 | 0.9518 |
| Listeria_monocytogenes_SLCC2755_932919                   | Listeria_monocytogenes_serotype_1_2a_str_02-5993_1196180 | 0.9174 |
| Listeria_monocytogenes_SLCC2540_879089                   | Listeria_monocytogenes_serotype_1_2a_str_02-5993_1196180 | 0.9345 |
| Listeria_monocytogenes_SLCC2479_882020                   | Listeria_monocytogenes_serotype_1_2a_str_02-5993_1196180 | 0.9509 |
| Listeria_monocytogenes_SLCC2378_879088                   | Listeria_monocytogenes_serotype_1_2a_str_02-5993_1196180 | 0.9174 |
| Listeria_monocytogenes_SLCC2376_882097                   | Listeria_monocytogenes_serotype_1_2a_str_02-5993_1196180 | 0.9216 |
| Listeria_monocytogenes_SLCC2372_932920                   | Listeria_monocytogenes_serotype_1_2a_str_02-5993_1196180 | 0.9439 |
| Listeria_monocytogenes_serotype_4b_str_LL195_1230340     | Listeria_monocytogenes_serotype_1_2a_str_02-5993_1196180 | 0.9225 |
| Listeria_monocytogenes_serotype_4b_str_LIS0087_1134669   | Listeria_monocytogenes_serotype_1_2a_str_02-5993_1196180 | 0.9337 |
| Listeria_monocytogenes_serotype_4b_str_F2365_265669      | Listeria_monocytogenes_serotype_1_2a_str_02-5993_1196180 | 0.9225 |
| Listeria_monocytogenes_serotype_4b_str_CLIP_80459_568819 | Listeria_monocytogenes_serotype_1_2a_str_02-5993_1196180 | 0.9292 |

Listeria\_monocytogenes\_serotype\_4b\_str\_81-0861\_1196161  
Listeria\_monocytogenes\_serotype\_4b\_str\_81-0592\_1196160  
Listeria\_monocytogenes\_serotype\_4b\_str\_81-0558\_1196159  
Listeria\_monocytogenes\_serotype\_4b\_str\_10-0809\_1196162  
Listeria\_monocytogenes\_serotype\_4b\_str\_02-6680\_1196175  
Listeria\_monocytogenes\_serotype\_4b\_str\_02-6679\_1196174  
Listeria\_monocytogenes\_serotype\_4b\_str\_02-1792\_1196173  
Listeria\_monocytogenes\_serotype\_4b\_str\_02-1289\_1196172  
Listeria\_monocytogenes\_serotype\_4b\_str\_02-1103\_1196171  
Listeria\_monocytogenes\_serotype\_3c\_str\_10-5027\_1196195  
Listeria\_monocytogenes\_serotype\_1\_2c\_str\_10-5026\_1196194  
Listeria\_monocytogenes\_serotype\_1\_2c\_str\_10-5025\_1196193  
Listeria\_monocytogenes\_serotype\_1\_2b\_str\_10-0811\_1196164  
Listeria\_monocytogenes\_serotype\_1\_2b\_str\_10-0810\_1196163  
Listeria\_monocytogenes\_serotype\_1\_2a\_str\_99-6370\_1196179  
Listeria\_monocytogenes\_serotype\_1\_2a\_str\_98-2035\_1196178  
Listeria\_monocytogenes\_serotype\_1\_2a\_str\_95-0093\_1196177  
Listeria\_monocytogenes\_serotype\_1\_2a\_str\_88-0478\_1196176  
Listeria\_monocytogenes\_serotype\_1\_2a\_str\_10-5024\_1196192  
Listeria\_monocytogenes\_serotype\_1\_2a\_str\_10-4758\_1196168  
Listeria\_monocytogenes\_serotype\_1\_2a\_str\_10-4754\_1196167  
Listeria\_monocytogenes\_serotype\_1\_2a\_str\_10-1321\_1196191  
Listeria\_monocytogenes\_serotype\_1\_2a\_str\_10-1047\_1196190  
Listeria\_monocytogenes\_serotype\_1\_2a\_str\_10-1046\_1196189  
Listeria\_monocytogenes\_serotype\_1\_2a\_str\_10-0934\_1196170  
Listeria\_monocytogenes\_serotype\_1\_2a\_str\_10-0933\_1196169  
Listeria\_monocytogenes\_serotype\_1\_2a\_str\_10-0815\_1196188  
Listeria\_monocytogenes\_serotype\_1\_2a\_str\_10-0814\_1196187  
Listeria\_monocytogenes\_serotype\_1\_2a\_str\_10-0813\_1196166  
Listeria\_monocytogenes\_serotype\_1\_2a\_str\_10-0812\_1196165  
Listeria\_monocytogenes\_serotype\_1\_2a\_str\_08-7669\_1196186  
Listeria\_monocytogenes\_serotype\_1\_2a\_str\_08-7374\_1196185  
Listeria\_monocytogenes\_serotype\_1\_2a\_str\_08-6997\_1196184  
Listeria\_monocytogenes\_serotype\_1\_2a\_str\_08-6569\_1196183  
Listeria\_monocytogenes\_serotype\_1\_2a\_str\_08-6056\_1196182  
Listeria\_monocytogenes\_serotype\_1\_2a\_str\_04-5457\_1196181  
Listeria\_monocytogenes\_serotype\_1\_2a\_str\_02-5993\_1196180  
Listeria\_welshimeri\_1643  
Listeria\_welshimeri\_serovar\_6b\_str\_SLCC5334\_386043  
Listeria\_seeligeri\_serovar\_1\_2b\_str\_SLCC3954\_683837  
Listeria\_seeligeri\_FSL\_S4-171\_702452  
Listeria\_seeligeri\_FSL\_N1-067\_702453  
Listeria\_seeligeri\_1640\_v1  
Listeria\_seeligeri\_1640  
Listeria\_monocytogenes\_WSLC1042\_1457188  
Listeria\_monocytogenes\_WSLC1001\_1457187  
Listeria\_monocytogenes\_SLCC7179\_879090  
Listeria\_monocytogenes\_SLCC5850\_882096  
Listeria\_monocytogenes\_SLCC2755\_932919  
Listeria\_monocytogenes\_SLCC2540\_879089  
Listeria\_monocytogenes\_SLCC2479\_882020  
Listeria\_monocytogenes\_SLCC2378\_879088  
Listeria\_monocytogenes\_SLCC2376\_882097  
Listeria\_monocytogenes\_SLCC2372\_932920  
Listeria\_monocytogenes\_serotype\_4b\_str\_LL195\_1230340  
Listeria\_monocytogenes\_serotype\_4b\_str\_LIS0087\_1134669  
Listeria\_monocytogenes\_serotype\_4b\_str\_F2365\_265669  
Listeria\_monocytogenes\_serotype\_4b\_str\_CLIP\_80459\_568819  
Listeria\_monocytogenes\_serotype\_4b\_str\_81-0861\_1196161  
Listeria\_monocytogenes\_serotype\_4b\_str\_81-0592\_1196160  
Listeria\_monocytogenes\_serotype\_4b\_str\_81-0558\_1196159  
Listeria\_monocytogenes\_serotype\_4b\_str\_10-0809\_1196162  
Listeria\_monocytogenes\_serotype\_4b\_str\_02-6680\_1196175  
Listeria\_monocytogenes\_serotype\_4b\_str\_02-6679\_1196174  
Listeria\_monocytogenes\_serotype\_4b\_str\_02-1792\_1196173  
Listeria\_monocytogenes\_serotype\_4b\_str\_02-1289\_1196172  
Listeria\_monocytogenes\_serotype\_4b\_str\_02-1103\_1196171  
Listeria\_monocytogenes\_serotype\_3c\_str\_10-5027\_1196195  
Listeria\_monocytogenes\_serotype\_1\_2c\_str\_10-5026\_1196194  
Listeria\_monocytogenes\_serotype\_1\_2c\_str\_10-5025\_1196193  
Listeria\_monocytogenes\_serotype\_1\_2b\_str\_10-0811\_1196164  
Listeria\_monocytogenes\_serotype\_1\_2b\_str\_10-0810\_1196163  
Listeria\_monocytogenes\_serotype\_1\_2a\_str\_99-6370\_1196179  
Listeria\_monocytogenes\_serotype\_1\_2a\_str\_98-2035\_1196178  
Listeria\_monocytogenes\_serotype\_1\_2a\_str\_95-0093\_1196177  
Listeria\_monocytogenes\_serotype\_1\_2a\_str\_88-0478\_1196176  
Listeria\_monocytogenes\_serotype\_1\_2a\_str\_10-5024\_1196192  
Listeria\_monocytogenes\_serotype\_1\_2a\_str\_10-4758\_1196168  
Listeria\_monocytogenes\_serotype\_1\_2a\_str\_10-4754\_1196167  
Listeria\_monocytogenes\_serotype\_1\_2a\_str\_10-1321\_1196191  
Listeria\_monocytogenes\_serotype\_1\_2a\_str\_10-1047\_1196190  
Listeria\_monocytogenes\_serotype\_1\_2a\_str\_10-1046\_1196189  
Listeria\_monocytogenes\_serotype\_1\_2a\_str\_10-0934\_1196170  
Listeria\_monocytogenes\_serotype\_1\_2a\_str\_10-0933\_1196169  
Listeria\_monocytogenes\_serotype\_1\_2a\_str\_10-0815\_1196188  
Listeria\_monocytogenes\_serotype\_1\_2a\_str\_10-0814\_1196187  
Listeria\_monocytogenes\_serotype\_1\_2a\_str\_10-0813\_1196166  
Listeria\_monocytogenes\_serotype\_1\_2a\_str\_10-0812\_1196165  
Listeria\_monocytogenes\_serotype\_1\_2a\_str\_08-7669\_1196186  
Listeria\_monocytogenes\_serotype\_1\_2a\_str\_08-7374\_1196185  
Listeria\_monocytogenes\_serotype\_1\_2a\_str\_08-6997\_1196184

[illegible]

0.9135  
0.9145  
0.9149  
0.9145  
0.9263  
0.9263  
0.916  
0.916  
0.916  
0.9538  
0.9542  
0.9542  
0.9345  
0.9345  
0.9934  
0.9934  
0.9982  
0.9938  
0.9996  
0.95  
0.9504  
0.9996  
0.9967  
0.9967  
0.9494  
0.9494  
0.9949  
0.9996  
0.954  
0.954  
0.9896  
0.9996  
0.9949  
0.9949  
0.9949  
0.9996  
0.0664  
0.8644  
0.8638  
0.8702  
0.8108  
0.8321  
0.8676  
0.8653  
0.9164  
0.952  
0.9486  
0.9522  
0.9177  
0.9349  
0.9509  
0.9178  
0.9216  
0.9439  
0.9229  
0.9337  
0.9229  
0.9296  
0.9135  
0.9145  
0.9152  
0.9145  
0.9263  
0.9263  
0.9164  
0.9164  
0.9164  
0.9538  
0.9546  
0.9546  
0.9345  
0.9345  
0.9934  
0.9934  
0.9982  
0.9941  
1  
0.9504  
0.9504  
1  
0.9967  
0.9967  
0.9494  
0.9494  
0.9949  
0.9996  
0.954  
0.954  
0.9896  
1  
0.9949

Listeria\_monocytogenes\_serotype\_1\_2a\_str\_08-6569\_1196183  
Listeria\_monocytogenes\_serotype\_1\_2a\_str\_08-6056\_1196182  
Listeria\_monocytogenes\_serotype\_1\_2a\_str\_04-5457\_1196181  
Listeria\_welshimeri\_1643  
Listeria\_welshimeri\_serovar\_6b\_str\_SLCC5334\_386043  
Listeria\_seeligeri\_serovar\_1\_2b\_str\_SLCC3954\_683837  
Listeria\_seeligeri\_FSL\_S4-171\_702452  
Listeria\_seeligeri\_FSL\_N1-067\_702453  
Listeria\_seeligeri\_1640\_v1  
Listeria\_seeligeri\_1640  
Listeria\_monocytogenes\_WSLC1042\_1457188  
Listeria\_monocytogenes\_WSLC1001\_1457187  
Listeria\_monocytogenes\_SLCC7179\_879090  
Listeria\_monocytogenes\_SLCC5850\_882096  
Listeria\_monocytogenes\_SLCC2755\_932919  
Listeria\_monocytogenes\_SLCC2540\_879089  
Listeria\_monocytogenes\_SLCC2479\_882020  
Listeria\_monocytogenes\_SLCC2378\_879088  
Listeria\_monocytogenes\_SLCC2376\_882097  
Listeria\_monocytogenes\_SLCC2372\_932920  
Listeria\_monocytogenes\_serotype\_4b\_str\_LL195\_1230340  
Listeria\_monocytogenes\_serotype\_4b\_str\_LIS0087\_1134669  
Listeria\_monocytogenes\_serotype\_4b\_str\_F2365\_265669  
Listeria\_monocytogenes\_serotype\_4b\_str\_CLIP\_80459\_568819  
Listeria\_monocytogenes\_serotype\_4b\_str\_81-0861\_1196161  
Listeria\_monocytogenes\_serotype\_4b\_str\_81-0592\_1196160  
Listeria\_monocytogenes\_serotype\_4b\_str\_81-0558\_1196159  
Listeria\_monocytogenes\_serotype\_4b\_str\_10-0809\_1196162  
Listeria\_monocytogenes\_serotype\_4b\_str\_02-6680\_1196175  
Listeria\_monocytogenes\_serotype\_4b\_str\_02-6679\_1196174  
Listeria\_monocytogenes\_serotype\_4b\_str\_02-1792\_1196173  
Listeria\_monocytogenes\_serotype\_4b\_str\_02-1289\_1196172  
Listeria\_monocytogenes\_serotype\_4b\_str\_02-1103\_1196171  
Listeria\_monocytogenes\_serotype\_3c\_str\_10-5027\_1196195  
Listeria\_monocytogenes\_serotype\_1\_2c\_str\_10-5026\_1196194  
Listeria\_monocytogenes\_serotype\_1\_2c\_str\_10-5025\_1196193  
Listeria\_monocytogenes\_serotype\_1\_2b\_str\_10-0811\_1196164  
Listeria\_monocytogenes\_serotype\_1\_2b\_str\_10-0810\_1196163  
Listeria\_monocytogenes\_serotype\_1\_2a\_str\_99-6370\_1196179  
Listeria\_monocytogenes\_serotype\_1\_2a\_str\_98-2035\_1196178  
Listeria\_monocytogenes\_serotype\_1\_2a\_str\_95-0093\_1196177  
Listeria\_monocytogenes\_serotype\_1\_2a\_str\_88-0478\_1196176  
Listeria\_monocytogenes\_serotype\_1\_2a\_str\_10-5024\_1196192  
Listeria\_monocytogenes\_serotype\_1\_2a\_str\_10-4758\_1196168  
Listeria\_monocytogenes\_serotype\_1\_2a\_str\_10-4754\_1196167  
Listeria\_monocytogenes\_serotype\_1\_2a\_str\_10-1321\_1196191  
Listeria\_monocytogenes\_serotype\_1\_2a\_str\_10-1047\_1196190  
Listeria\_monocytogenes\_serotype\_1\_2a\_str\_10-1046\_1196189  
Listeria\_monocytogenes\_serotype\_1\_2a\_str\_10-0934\_1196170  
Listeria\_monocytogenes\_serotype\_1\_2a\_str\_10-0933\_1196169  
Listeria\_monocytogenes\_serotype\_1\_2a\_str\_10-0815\_1196188  
Listeria\_monocytogenes\_serotype\_1\_2a\_str\_10-0814\_1196187  
Listeria\_monocytogenes\_serotype\_1\_2a\_str\_10-0813\_1196166  
Listeria\_monocytogenes\_serotype\_1\_2a\_str\_10-0812\_1196165  
Listeria\_monocytogenes\_serotype\_1\_2a\_str\_08-7669\_1196186  
Listeria\_monocytogenes\_serotype\_1\_2a\_str\_08-7374\_1196185  
Listeria\_monocytogenes\_serotype\_1\_2a\_str\_08-6997\_1196184  
Listeria\_monocytogenes\_serotype\_1\_2a\_str\_08-6569\_1196183  
Listeria\_monocytogenes\_serotype\_1\_2a\_str\_08-6056\_1196182  
Listeria\_welshimeri\_1643  
Listeria\_welshimeri\_serovar\_6b\_str\_SLCC5334\_386043  
Listeria\_seeligeri\_serovar\_1\_2b\_str\_SLCC3954\_683837  
Listeria\_seeligeri\_FSL\_S4-171\_702452  
Listeria\_seeligeri\_FSL\_N1-067\_702453  
Listeria\_seeligeri\_1640\_v1  
Listeria\_seeligeri\_1640  
Listeria\_monocytogenes\_WSLC1042\_1457188  
Listeria\_monocytogenes\_WSLC1001\_1457187  
Listeria\_monocytogenes\_SLCC7179\_879090  
Listeria\_monocytogenes\_SLCC5850\_882096  
Listeria\_monocytogenes\_SLCC2755\_932919  
Listeria\_monocytogenes\_SLCC2540\_879089  
Listeria\_monocytogenes\_SLCC2479\_882020  
Listeria\_monocytogenes\_SLCC2378\_879088  
Listeria\_monocytogenes\_SLCC2376\_882097  
Listeria\_monocytogenes\_SLCC2372\_932920  
Listeria\_monocytogenes\_serotype\_4b\_str\_LL195\_1230340  
Listeria\_monocytogenes\_serotype\_4b\_str\_LIS0087\_1134669  
Listeria\_monocytogenes\_serotype\_4b\_str\_F2365\_265669  
Listeria\_monocytogenes\_serotype\_4b\_str\_CLIP\_80459\_568819  
Listeria\_monocytogenes\_serotype\_4b\_str\_81-0861\_1196161  
Listeria\_monocytogenes\_serotype\_4b\_str\_81-0592\_1196160  
Listeria\_monocytogenes\_serotype\_4b\_str\_81-0558\_1196159  
Listeria\_monocytogenes\_serotype\_4b\_str\_10-0809\_1196162  
Listeria\_monocytogenes\_serotype\_4b\_str\_02-6680\_1196175  
Listeria\_monocytogenes\_serotype\_4b\_str\_02-6679\_1196174  
Listeria\_monocytogenes\_serotype\_4b\_str\_02-1792\_1196173  
Listeria\_monocytogenes\_serotype\_4b\_str\_02-1289\_1196172  
Listeria\_monocytogenes\_serotype\_4b\_str\_02-1103\_1196171  
Listeria\_monocytogenes\_serotype\_3c\_str\_10-5027\_1196195  
Listeria\_monocytogenes\_serotype\_1\_2c\_str\_10-5026\_1196194

[illegible]

Listeria\_monocytogenes\_serotype\_1\_2c\_str\_10-5025\_1196193  
Listeria\_monocytogenes\_serotype\_1\_2b\_str\_10-0811\_1196164  
Listeria\_monocytogenes\_serotype\_1\_2b\_str\_10-0810\_1196163  
Listeria\_monocytogenes\_serotype\_1\_2a\_str\_99-6370\_1196179  
Listeria\_monocytogenes\_serotype\_1\_2a\_str\_98-2035\_1196178  
Listeria\_monocytogenes\_serotype\_1\_2a\_str\_95-0093\_1196177  
Listeria\_monocytogenes\_serotype\_1\_2a\_str\_88-0478\_1196176  
Listeria\_monocytogenes\_serotype\_1\_2a\_str\_10-5024\_1196192  
Listeria\_monocytogenes\_serotype\_1\_2a\_str\_10-4758\_1196168  
Listeria\_monocytogenes\_serotype\_1\_2a\_str\_10-4754\_1196167  
Listeria\_monocytogenes\_serotype\_1\_2a\_str\_10-1321\_1196191  
Listeria\_monocytogenes\_serotype\_1\_2a\_str\_10-1047\_1196190  
Listeria\_monocytogenes\_serotype\_1\_2a\_str\_10-1046\_1196189  
Listeria\_monocytogenes\_serotype\_1\_2a\_str\_10-0934\_1196170  
Listeria\_monocytogenes\_serotype\_1\_2a\_str\_10-0933\_1196169  
Listeria\_monocytogenes\_serotype\_1\_2a\_str\_10-0815\_1196188  
Listeria\_monocytogenes\_serotype\_1\_2a\_str\_10-0814\_1196187  
Listeria\_monocytogenes\_serotype\_1\_2a\_str\_10-0813\_1196166  
Listeria\_monocytogenes\_serotype\_1\_2a\_str\_10-0812\_1196165  
Listeria\_monocytogenes\_serotype\_1\_2a\_str\_08-7669\_1196186  
Listeria\_monocytogenes\_serotype\_1\_2a\_str\_08-7374\_1196185  
Listeria\_monocytogenes\_serotype\_1\_2a\_str\_08-6997\_1196184  
Listeria\_monocytogenes\_serotype\_1\_2a\_str\_08-6569\_1196183  
Listeria\_welshimeri\_1643  
Listeria\_welshimeri\_serovar\_6b\_str\_SLCC5334\_386043  
Listeria\_seeligeri\_serovar\_1\_2b\_str\_SLCC3954\_683837  
Listeria\_seeligeri\_FSL\_S4-171\_702452  
Listeria\_seeligeri\_FSL\_N1-067\_702453  
Listeria\_seeligeri\_1640\_v1  
Listeria\_seeligeri\_1640  
Listeria\_monocytogenes\_WSLC1042\_1457188  
Listeria\_monocytogenes\_WSLC1001\_1457187  
Listeria\_monocytogenes\_SLCC7179\_879090  
Listeria\_monocytogenes\_SLCC5850\_882096  
Listeria\_monocytogenes\_SLCC2755\_932919  
Listeria\_monocytogenes\_SLCC2540\_879089  
Listeria\_monocytogenes\_SLCC2479\_882020  
Listeria\_monocytogenes\_SLCC2378\_879088  
Listeria\_monocytogenes\_SLCC2376\_882097  
Listeria\_monocytogenes\_SLCC2372\_932920  
Listeria\_monocytogenes\_serotype\_4b\_str\_LL195\_1230340  
Listeria\_monocytogenes\_serotype\_4b\_str\_LIS0087\_1134669  
Listeria\_monocytogenes\_serotype\_4b\_str\_F2365\_265669  
Listeria\_monocytogenes\_serotype\_4b\_str\_CLIP\_80459\_568819  
Listeria\_monocytogenes\_serotype\_4b\_str\_81-0861\_1196161  
Listeria\_monocytogenes\_serotype\_4b\_str\_81-0592\_1196160  
Listeria\_monocytogenes\_serotype\_4b\_str\_81-0558\_1196159  
Listeria\_monocytogenes\_serotype\_4b\_str\_10-0809\_1196162  
Listeria\_monocytogenes\_serotype\_4b\_str\_02-6680\_1196175  
Listeria\_monocytogenes\_serotype\_4b\_str\_02-6679\_1196174  
Listeria\_monocytogenes\_serotype\_4b\_str\_02-1792\_1196173  
Listeria\_monocytogenes\_serotype\_4b\_str\_02-1289\_1196172  
Listeria\_monocytogenes\_serotype\_4b\_str\_02-1103\_1196171  
Listeria\_monocytogenes\_serotype\_3c\_str\_10-5027\_1196195  
Listeria\_monocytogenes\_serotype\_1\_2c\_str\_10-5026\_1196194  
Listeria\_monocytogenes\_serotype\_1\_2c\_str\_10-5025\_1196193  
Listeria\_monocytogenes\_serotype\_1\_2b\_str\_10-0811\_1196164  
Listeria\_monocytogenes\_serotype\_1\_2b\_str\_10-0810\_1196163  
Listeria\_monocytogenes\_serotype\_1\_2a\_str\_99-6370\_1196179  
Listeria\_monocytogenes\_serotype\_1\_2a\_str\_98-2035\_1196178  
Listeria\_monocytogenes\_serotype\_1\_2a\_str\_95-0093\_1196177  
Listeria\_monocytogenes\_serotype\_1\_2a\_str\_88-0478\_1196176  
Listeria\_monocytogenes\_serotype\_1\_2a\_str\_10-5024\_1196192  
Listeria\_monocytogenes\_serotype\_1\_2a\_str\_10-4758\_1196168  
Listeria\_monocytogenes\_serotype\_1\_2a\_str\_10-4754\_1196167  
Listeria\_monocytogenes\_serotype\_1\_2a\_str\_10-1321\_1196191  
Listeria\_monocytogenes\_serotype\_1\_2a\_str\_10-1047\_1196190  
Listeria\_monocytogenes\_serotype\_1\_2a\_str\_10-1046\_1196189  
Listeria\_monocytogenes\_serotype\_1\_2a\_str\_10-0934\_1196170  
Listeria\_monocytogenes\_serotype\_1\_2a\_str\_10-0933\_1196169  
Listeria\_monocytogenes\_serotype\_1\_2a\_str\_10-0815\_1196188  
Listeria\_monocytogenes\_serotype\_1\_2a\_str\_10-0814\_1196187  
Listeria\_monocytogenes\_serotype\_1\_2a\_str\_10-0813\_1196166  
Listeria\_monocytogenes\_serotype\_1\_2a\_str\_10-0812\_1196165  
Listeria\_monocytogenes\_serotype\_1\_2a\_str\_08-7669\_1196186  
Listeria\_monocytogenes\_serotype\_1\_2a\_str\_08-7374\_1196185  
Listeria\_monocytogenes\_serotype\_1\_2a\_str\_08-6997\_1196184  
Listeria\_welshimeri\_1643  
Listeria\_welshimeri\_serovar\_6b\_str\_SLCC5334\_386043  
Listeria\_seeligeri\_serovar\_1\_2b\_str\_SLCC3954\_683837  
Listeria\_seeligeri\_FSL\_S4-171\_702452  
Listeria\_seeligeri\_FSL\_N1-067\_702453  
Listeria\_seeligeri\_1640\_v1  
Listeria\_seeligeri\_1640  
Listeria\_monocytogenes\_WSLC1042\_1457188  
Listeria\_monocytogenes\_WSLC1001\_1457187  
Listeria\_monocytogenes\_SLCC7179\_879090  
Listeria\_monocytogenes\_SLCC5850\_882096  
Listeria\_monocytogenes\_SLCC2755\_932919  
Listeria\_monocytogenes\_SLCC2540\_879089  
Listeria\_monocytogenes\_SLCC2479\_882020

[illegible]



Listeria\_monocytogenes\_SLCC2378\_879088  
Listeria\_monocytogenes\_SLCC2376\_882097  
Listeria\_monocytogenes\_SLCC2372\_932920  
Listeria\_monocytogenes\_serotype\_4b\_str\_LL195\_1230340  
Listeria\_monocytogenes\_serotype\_4b\_str\_LIS0087\_1134669  
Listeria\_monocytogenes\_serotype\_4b\_str\_F2365\_265669  
Listeria\_monocytogenes\_serotype\_4b\_str\_CLIP\_80459\_568819  
Listeria\_monocytogenes\_serotype\_4b\_str\_81-0861\_1196161  
Listeria\_monocytogenes\_serotype\_4b\_str\_81-0592\_1196160  
Listeria\_monocytogenes\_serotype\_4b\_str\_81-0558\_1196159  
Listeria\_monocytogenes\_serotype\_4b\_str\_10-0809\_1196162  
Listeria\_monocytogenes\_serotype\_4b\_str\_02-6680\_1196175  
Listeria\_monocytogenes\_serotype\_4b\_str\_02-6679\_1196174  
Listeria\_monocytogenes\_serotype\_4b\_str\_02-1792\_1196173  
Listeria\_monocytogenes\_serotype\_4b\_str\_02-1289\_1196172  
Listeria\_monocytogenes\_serotype\_4b\_str\_02-1103\_1196171  
Listeria\_monocytogenes\_serotype\_3c\_str\_10-5027\_1196195  
Listeria\_monocytogenes\_serotype\_1\_2c\_str\_10-5026\_1196194  
Listeria\_monocytogenes\_serotype\_1\_2c\_str\_10-5025\_1196193  
Listeria\_monocytogenes\_serotype\_1\_2b\_str\_10-0811\_1196164  
Listeria\_monocytogenes\_serotype\_1\_2b\_str\_10-0810\_1196163  
Listeria\_monocytogenes\_serotype\_1\_2a\_str\_99-6370\_1196179  
Listeria\_monocytogenes\_serotype\_1\_2a\_str\_98-2035\_1196178  
Listeria\_monocytogenes\_serotype\_1\_2a\_str\_95-0093\_1196177  
Listeria\_monocytogenes\_serotype\_1\_2a\_str\_88-0478\_1196176  
Listeria\_monocytogenes\_serotype\_1\_2a\_str\_10-5024\_1196192  
Listeria\_monocytogenes\_serotype\_1\_2a\_str\_10-4758\_1196168  
Listeria\_monocytogenes\_serotype\_1\_2a\_str\_10-4754\_1196167  
Listeria\_monocytogenes\_serotype\_1\_2a\_str\_10-1321\_1196191  
Listeria\_monocytogenes\_serotype\_1\_2a\_str\_10-1047\_1196190  
Listeria\_monocytogenes\_serotype\_1\_2a\_str\_10-1046\_1196189  
Listeria\_monocytogenes\_serotype\_1\_2a\_str\_10-0934\_1196170  
Listeria\_monocytogenes\_serotype\_1\_2a\_str\_10-0933\_1196169  
Listeria\_monocytogenes\_serotype\_1\_2a\_str\_10-0815\_1196188  
Listeria\_monocytogenes\_serotype\_1\_2a\_str\_10-0814\_1196187  
Listeria\_monocytogenes\_serotype\_1\_2a\_str\_10-0813\_1196166  
Listeria\_monocytogenes\_serotype\_1\_2a\_str\_10-0812\_1196165  
Listeria\_monocytogenes\_serotype\_1\_2a\_str\_08-7669\_1196186  
Listeria\_monocytogenes\_serotype\_1\_2a\_str\_08-7374\_1196185  
Listeria\_welshimeri\_1643  
Listeria\_welshimeri\_serovar\_6b\_str\_SLCC5334\_386043  
Listeria\_seeligeri\_serovar\_1\_2b\_str\_SLCC3954\_683837  
Listeria\_seeligeri\_FSL\_S4-171\_702452  
Listeria\_seeligeri\_FSL\_N1-067\_702453  
Listeria\_seeligeri\_1640\_v1  
Listeria\_seeligeri\_1640  
Listeria\_monocytogenes\_WSLC1042\_1457188  
Listeria\_monocytogenes\_WSLC1001\_1457187  
Listeria\_monocytogenes\_SLCC7179\_879090  
Listeria\_monocytogenes\_SLCC5850\_882096  
Listeria\_monocytogenes\_SLCC2755\_932919  
Listeria\_monocytogenes\_SLCC2540\_879089  
Listeria\_monocytogenes\_SLCC2479\_882020  
Listeria\_monocytogenes\_SLCC2378\_879088  
Listeria\_monocytogenes\_SLCC2376\_882097  
Listeria\_monocytogenes\_SLCC2372\_932920  
Listeria\_monocytogenes\_serotype\_4b\_str\_LL195\_1230340  
Listeria\_monocytogenes\_serotype\_4b\_str\_LIS0087\_1134669  
Listeria\_monocytogenes\_serotype\_4b\_str\_F2365\_265669  
Listeria\_monocytogenes\_serotype\_4b\_str\_CLIP\_80459\_568819  
Listeria\_monocytogenes\_serotype\_4b\_str\_81-0861\_1196161  
Listeria\_monocytogenes\_serotype\_4b\_str\_81-0592\_1196160  
Listeria\_monocytogenes\_serotype\_4b\_str\_81-0558\_1196159  
Listeria\_monocytogenes\_serotype\_4b\_str\_10-0809\_1196162  
Listeria\_monocytogenes\_serotype\_4b\_str\_02-6680\_1196175  
Listeria\_monocytogenes\_serotype\_4b\_str\_02-6679\_1196174  
Listeria\_monocytogenes\_serotype\_4b\_str\_02-1792\_1196173  
Listeria\_monocytogenes\_serotype\_4b\_str\_02-1289\_1196172  
Listeria\_monocytogenes\_serotype\_4b\_str\_02-1103\_1196171  
Listeria\_monocytogenes\_serotype\_3c\_str\_10-5027\_1196195  
Listeria\_monocytogenes\_serotype\_1\_2c\_str\_10-5026\_1196194  
Listeria\_monocytogenes\_serotype\_1\_2c\_str\_10-5025\_1196193  
Listeria\_monocytogenes\_serotype\_1\_2b\_str\_10-0811\_1196164  
Listeria\_monocytogenes\_serotype\_1\_2b\_str\_10-0810\_1196163  
Listeria\_monocytogenes\_serotype\_1\_2a\_str\_99-6370\_1196179  
Listeria\_monocytogenes\_serotype\_1\_2a\_str\_98-2035\_1196178  
Listeria\_monocytogenes\_serotype\_1\_2a\_str\_95-0093\_1196177  
Listeria\_monocytogenes\_serotype\_1\_2a\_str\_88-0478\_1196176  
Listeria\_monocytogenes\_serotype\_1\_2a\_str\_10-5024\_1196192  
Listeria\_monocytogenes\_serotype\_1\_2a\_str\_10-4758\_1196168  
Listeria\_monocytogenes\_serotype\_1\_2a\_str\_10-4754\_1196167  
Listeria\_monocytogenes\_serotype\_1\_2a\_str\_10-1321\_1196191  
Listeria\_monocytogenes\_serotype\_1\_2a\_str\_10-1047\_1196190  
Listeria\_monocytogenes\_serotype\_1\_2a\_str\_10-1046\_1196189  
Listeria\_monocytogenes\_serotype\_1\_2a\_str\_10-0934\_1196170  
Listeria\_monocytogenes\_serotype\_1\_2a\_str\_10-0933\_1196169  
Listeria\_monocytogenes\_serotype\_1\_2a\_str\_10-0815\_1196188  
Listeria\_monocytogenes\_serotype\_1\_2a\_str\_10-0814\_1196187  
Listeria\_monocytogenes\_serotype\_1\_2a\_str\_10-0813\_1196166  
Listeria\_monocytogenes\_serotype\_1\_2a\_str\_10-0812\_1196165  
Listeria\_monocytogenes\_serotype\_1\_2a\_str\_08-7669\_1196186

[illegible]



|                                                          |                                                          |        |
|----------------------------------------------------------|----------------------------------------------------------|--------|
| Listeria_welshimeri_1643                                 | Listeria_monocytogenes_serotype_1_2a_str_10-0812_1196165 | 0.874  |
| Listeria_welshimeri_serovar_6b_str_SLCC5334_386043       | Listeria_monocytogenes_serotype_1_2a_str_10-0812_1196165 | 0.8737 |
| Listeria_seeligeri_serovar_1_2b_str_SLCC3954_683837      | Listeria_monocytogenes_serotype_1_2a_str_10-0812_1196165 | 0.8776 |
| Listeria_seeligeri_FSL_S4-171_702452                     | Listeria_monocytogenes_serotype_1_2a_str_10-0812_1196165 | 0.8174 |
| Listeria_seeligeri_FSL_N1-067_702453                     | Listeria_monocytogenes_serotype_1_2a_str_10-0812_1196165 | 0.8303 |
| Listeria_seeligeri_1640_v1                               | Listeria_monocytogenes_serotype_1_2a_str_10-0812_1196165 | 0.8754 |
| Listeria_seeligeri_1640                                  | Listeria_monocytogenes_serotype_1_2a_str_10-0812_1196165 | 0.8801 |
| Listeria_monocytogenes_WSLC1042_1457188                  | Listeria_monocytogenes_serotype_1_2a_str_10-0812_1196165 | 0.9219 |
| Listeria_monocytogenes_WSLC1001_1457187                  | Listeria_monocytogenes_serotype_1_2a_str_10-0812_1196165 | 0.9775 |
| Listeria_monocytogenes_SLCC7179_879090                   | Listeria_monocytogenes_serotype_1_2a_str_10-0812_1196165 | 0.9617 |
| Listeria_monocytogenes_SLCC5850_882096                   | Listeria_monocytogenes_serotype_1_2a_str_10-0812_1196165 | 0.9785 |
| Listeria_monocytogenes_SLCC2755_932919                   | Listeria_monocytogenes_serotype_1_2a_str_10-0812_1196165 | 0.9274 |
| Listeria_monocytogenes_SLCC2540_879089                   | Listeria_monocytogenes_serotype_1_2a_str_10-0812_1196165 | 0.9414 |
| Listeria_monocytogenes_SLCC2479_882020                   | Listeria_monocytogenes_serotype_1_2a_str_10-0812_1196165 | 0.9537 |
| Listeria_monocytogenes_SLCC2378_879088                   | Listeria_monocytogenes_serotype_1_2a_str_10-0812_1196165 | 0.923  |
| Listeria_monocytogenes_SLCC2376_882097                   | Listeria_monocytogenes_serotype_1_2a_str_10-0812_1196165 | 0.9354 |
| Listeria_monocytogenes_SLCC2372_932920                   | Listeria_monocytogenes_serotype_1_2a_str_10-0812_1196165 | 0.9467 |
| Listeria_monocytogenes_serotype_4b_str_LL195_1230340     | Listeria_monocytogenes_serotype_1_2a_str_10-0812_1196165 | 0.9289 |
| Listeria_monocytogenes_serotype_4b_str_LIS0087_1134669   | Listeria_monocytogenes_serotype_1_2a_str_10-0812_1196165 | 0.9676 |
| Listeria_monocytogenes_serotype_4b_str_F2365_265669      | Listeria_monocytogenes_serotype_1_2a_str_10-0812_1196165 | 0.9289 |
| Listeria_monocytogenes_serotype_4b_str_CLIP_80459_568819 | Listeria_monocytogenes_serotype_1_2a_str_10-0812_1196165 | 0.9357 |
| Listeria_monocytogenes_serotype_4b_str_81-0861_1196161   | Listeria_monocytogenes_serotype_1_2a_str_10-0812_1196165 | 0.9275 |
| Listeria_monocytogenes_serotype_4b_str_81-0592_1196160   | Listeria_monocytogenes_serotype_1_2a_str_10-0812_1196165 | 0.9286 |
| Listeria_monocytogenes_serotype_4b_str_81-0558_1196159   | Listeria_monocytogenes_serotype_1_2a_str_10-0812_1196165 | 0.9289 |
| Listeria_monocytogenes_serotype_4b_str_10-0809_1196162   | Listeria_monocytogenes_serotype_1_2a_str_10-0812_1196165 | 0.9286 |
| Listeria_monocytogenes_serotype_4b_str_02-6680_1196175   | Listeria_monocytogenes_serotype_1_2a_str_10-0812_1196165 | 0.9343 |
| Listeria_monocytogenes_serotype_4b_str_02-6679_1196174   | Listeria_monocytogenes_serotype_1_2a_str_10-0812_1196165 | 0.9343 |
| Listeria_monocytogenes_serotype_4b_str_02-1792_1196173   | Listeria_monocytogenes_serotype_1_2a_str_10-0812_1196165 | 0.9275 |
| Listeria_monocytogenes_serotype_4b_str_02-1289_1196172   | Listeria_monocytogenes_serotype_1_2a_str_10-0812_1196165 | 0.9275 |
| Listeria_monocytogenes_serotype_4b_str_02-1103_1196171   | Listeria_monocytogenes_serotype_1_2a_str_10-0812_1196165 | 0.9275 |
| Listeria_monocytogenes_serotype_3c_str_10-5027_1196195   | Listeria_monocytogenes_serotype_1_2a_str_10-0812_1196165 | 0.9552 |
| Listeria_monocytogenes_serotype_1_2c_str_10-5026_1196194 | Listeria_monocytogenes_serotype_1_2a_str_10-0812_1196165 | 0.956  |
| Listeria_monocytogenes_serotype_1_2c_str_10-5025_1196193 | Listeria_monocytogenes_serotype_1_2a_str_10-0812_1196165 | 0.956  |
| Listeria_monocytogenes_serotype_1_2b_str_10-0811_1196164 | Listeria_monocytogenes_serotype_1_2a_str_10-0812_1196165 | 0.9491 |
| Listeria_monocytogenes_serotype_1_2b_str_10-0810_1196163 | Listeria_monocytogenes_serotype_1_2a_str_10-0812_1196165 | 0.9491 |
| Listeria_monocytogenes_serotype_1_2a_str_99-6370_1196179 | Listeria_monocytogenes_serotype_1_2a_str_10-0812_1196165 | 0.9492 |
| Listeria_monocytogenes_serotype_1_2a_str_98-2035_1196178 | Listeria_monocytogenes_serotype_1_2a_str_10-0812_1196165 | 0.9492 |
| Listeria_monocytogenes_serotype_1_2a_str_95-0093_1196177 | Listeria_monocytogenes_serotype_1_2a_str_10-0812_1196165 | 0.9533 |
| Listeria_monocytogenes_serotype_1_2a_str_88-0478_1196176 | Listeria_monocytogenes_serotype_1_2a_str_10-0812_1196165 | 0.9533 |
| Listeria_monocytogenes_serotype_1_2a_str_10-5024_1196192 | Listeria_monocytogenes_serotype_1_2a_str_10-0812_1196165 | 0.954  |
| Listeria_monocytogenes_serotype_1_2a_str_10-4758_1196168 | Listeria_monocytogenes_serotype_1_2a_str_10-0812_1196165 | 0.9597 |
| Listeria_monocytogenes_serotype_1_2a_str_10-4754_1196167 | Listeria_monocytogenes_serotype_1_2a_str_10-0812_1196165 | 0.96   |
| Listeria_monocytogenes_serotype_1_2a_str_10-1321_1196191 | Listeria_monocytogenes_serotype_1_2a_str_10-0812_1196165 | 0.954  |
| Listeria_monocytogenes_serotype_1_2a_str_10-1047_1196190 | Listeria_monocytogenes_serotype_1_2a_str_10-0812_1196165 | 0.9573 |
| Listeria_monocytogenes_serotype_1_2a_str_10-1046_1196189 | Listeria_monocytogenes_serotype_1_2a_str_10-0812_1196165 | 0.9573 |
| Listeria_monocytogenes_serotype_1_2a_str_10-0934_1196170 | Listeria_monocytogenes_serotype_1_2a_str_10-0812_1196165 | 0.9656 |
| Listeria_monocytogenes_serotype_1_2a_str_10-0933_1196169 | Listeria_monocytogenes_serotype_1_2a_str_10-0812_1196165 | 0.9656 |
| Listeria_monocytogenes_serotype_1_2a_str_10-0815_1196188 | Listeria_monocytogenes_serotype_1_2a_str_10-0812_1196165 | 0.9498 |
| Listeria_monocytogenes_serotype_1_2a_str_10-0814_1196187 | Listeria_monocytogenes_serotype_1_2a_str_10-0812_1196165 | 0.9544 |
| Listeria_monocytogenes_serotype_1_2a_str_10-0813_1196166 | Listeria_monocytogenes_serotype_1_2a_str_10-0812_1196165 | 1      |
| Listeria_monocytogenes_serotype_1_2a_str_10-0812_1196165 | Listeria_monocytogenes_serotype_1_2a_str_10-0812_1196165 | 0.067  |
| Listeria_welshimeri_1643                                 | Listeria_monocytogenes_serotype_1_2a_str_10-0813_1196166 | 0.874  |
| Listeria_welshimeri_serovar_6b_str_SLCC5334_386043       | Listeria_monocytogenes_serotype_1_2a_str_10-0813_1196166 | 0.8737 |
| Listeria_seeligeri_serovar_1_2b_str_SLCC3954_683837      | Listeria_monocytogenes_serotype_1_2a_str_10-0813_1196166 | 0.8776 |
| Listeria_seeligeri_FSL_S4-171_702452                     | Listeria_monocytogenes_serotype_1_2a_str_10-0813_1196166 | 0.8174 |
| Listeria_seeligeri_FSL_N1-067_702453                     | Listeria_monocytogenes_serotype_1_2a_str_10-0813_1196166 | 0.8303 |
| Listeria_seeligeri_1640_v1                               | Listeria_monocytogenes_serotype_1_2a_str_10-0813_1196166 | 0.8754 |
| Listeria_seeligeri_1640                                  | Listeria_monocytogenes_serotype_1_2a_str_10-0813_1196166 | 0.8801 |
| Listeria_monocytogenes_WSLC1042_1457188                  | Listeria_monocytogenes_serotype_1_2a_str_10-0813_1196166 | 0.9219 |
| Listeria_monocytogenes_WSLC1001_1457187                  | Listeria_monocytogenes_serotype_1_2a_str_10-0813_1196166 | 0.9775 |
| Listeria_monocytogenes_SLCC7179_879090                   | Listeria_monocytogenes_serotype_1_2a_str_10-0813_1196166 | 0.9617 |
| Listeria_monocytogenes_SLCC5850_882096                   | Listeria_monocytogenes_serotype_1_2a_str_10-0813_1196166 | 0.9785 |
| Listeria_monocytogenes_SLCC2755_932919                   | Listeria_monocytogenes_serotype_1_2a_str_10-0813_1196166 | 0.9274 |
| Listeria_monocytogenes_SLCC2540_879089                   | Listeria_monocytogenes_serotype_1_2a_str_10-0813_1196166 | 0.9414 |
| Listeria_monocytogenes_SLCC2479_882020                   | Listeria_monocytogenes_serotype_1_2a_str_10-0813_1196166 | 0.9537 |
| Listeria_monocytogenes_SLCC2378_879088                   | Listeria_monocytogenes_serotype_1_2a_str_10-0813_1196166 | 0.923  |
| Listeria_monocytogenes_SLCC2376_882097                   | Listeria_monocytogenes_serotype_1_2a_str_10-0813_1196166 | 0.9354 |
| Listeria_monocytogenes_SLCC2372_932920                   | Listeria_monocytogenes_serotype_1_2a_str_10-0813_1196166 | 0.9467 |
| Listeria_monocytogenes_serotype_4b_str_LL195_1230340     | Listeria_monocytogenes_serotype_1_2a_str_10-0813_1196166 | 0.9289 |
| Listeria_monocytogenes_serotype_4b_str_LIS0087_1134669   | Listeria_monocytogenes_serotype_1_2a_str_10-0813_1196166 | 0.9676 |
| Listeria_monocytogenes_serotype_4b_str_F2365_265669      | Listeria_monocytogenes_serotype_1_2a_str_10-0813_1196166 | 0.9289 |
| Listeria_monocytogenes_serotype_4b_str_CLIP_80459_568819 | Listeria_monocytogenes_serotype_1_2a_str_10-0813_1196166 | 0.9357 |
| Listeria_monocytogenes_serotype_4b_str_81-0861_1196161   | Listeria_monocytogenes_serotype_1_2a_str_10-0813_1196166 | 0.9275 |
| Listeria_monocytogenes_serotype_4b_str_81-0592_1196160   | Listeria_monocytogenes_serotype_1_2a_str_10-0813_1196166 | 0.9286 |
| Listeria_monocytogenes_serotype_4b_str_81-0558_1196159   | Listeria_monocytogenes_serotype_1_2a_str_10-0813_1196166 | 0.9289 |
| Listeria_monocytogenes_serotype_4b_str_10-0809_1196162   | Listeria_monocytogenes_serotype_1_2a_str_10-0813_1196166 | 0.9286 |
| Listeria_monocytogenes_serotype_4b_str_02-6680_1196175   | Listeria_monocytogenes_serotype_1_2a_str_10-0813_1196166 | 0.9343 |
| Listeria_monocytogenes_serotype_4b_str_02-6679_1196174   | Listeria_monocytogenes_serotype_1_2a_str_10-0813_1196166 | 0.9343 |
| Listeria_monocytogenes_serotype_4b_str_02-1792_1196173   | Listeria_monocytogenes_serotype_1_2a_str_10-0813_1196166 | 0.9275 |
| Listeria_monocytogenes_serotype_4b_str_02-1289_1196172   | Listeria_monocytogenes_serotype_1_2a_str_10-0813_1196166 | 0.9275 |
| Listeria_monocytogenes_serotype_4b_str_02-1103_1196171   | Listeria_monocytogenes_serotype_1_2a_str_10-0813_1196166 | 0.9275 |
| Listeria_monocytogenes_serotype_3c_str_10-5027_1196195   | Listeria_monocytogenes_serotype_1_2a_str_10-0813_1196166 | 0.9552 |
| Listeria_monocytogenes_serotype_1_2c_str_10-5026_1196194 | Listeria_monocytogenes_serotype_1_2a_str_10-0813_1196166 | 0.956  |
| Listeria_monocytogenes_serotype_1_2c_str_10-5025_1196193 | Listeria_monocytogenes_serotype_1_2a_str_10-0813_1196166 | 0.956  |
| Listeria_monocytogenes_serotype_1_2b_str_10-0811_1196164 | Listeria_monocytogenes_serotype_1_2a_str_10-0813_1196166 | 0.9491 |
| Listeria_monocytogenes_serotype_1_2b_str_10-0810_1196163 | Listeria_monocytogenes_serotype_1_2a_str_10-0813_1196166 | 0.9491 |
| Listeria_monocytogenes_serotype_1_2a_str_99-6370_1196179 | Listeria_monocytogenes_serotype_1_2a_str_10-0813_1196166 | 0.9492 |
| Listeria_monocytogenes_serotype_1_2a_str_98-2035_1196178 | Listeria_monocytogenes_serotype_1_2a_str_10-0813_1196166 | 0.9492 |
| Listeria_monocytogenes_serotype_1_2a_str_95-0093_1196177 | Listeria_monocytogenes_serotype_1_2a_str_10-0813_1196166 | 0.9533 |
| Listeria_monocytogenes_serotype_1_2a_str_88-0478_1196176 | Listeria_monocytogenes_serotype_1_2a_str_10-0813_1196166 | 0.9533 |
| Listeria_monocytogenes_serotype_1_2a_str_10-5024_1196192 | Listeria_monocytogenes_serotype_1_2a_str_10-0813_1196166 | 0.954  |

|                                                          |                                                          |        |
|----------------------------------------------------------|----------------------------------------------------------|--------|
| Listeria_monocytogenes_serotype_1_2a_str_10-4758_1196168 | Listeria_monocytogenes_serotype_1_2a_str_10-0813_1196166 | 0.9597 |
| Listeria_monocytogenes_serotype_1_2a_str_10-4754_1196167 | Listeria_monocytogenes_serotype_1_2a_str_10-0813_1196166 | 0.96   |
| Listeria_monocytogenes_serotype_1_2a_str_10-1321_1196191 | Listeria_monocytogenes_serotype_1_2a_str_10-0813_1196166 | 0.954  |
| Listeria_monocytogenes_serotype_1_2a_str_10-1047_1196190 | Listeria_monocytogenes_serotype_1_2a_str_10-0813_1196166 | 0.9573 |
| Listeria_monocytogenes_serotype_1_2a_str_10-1046_1196189 | Listeria_monocytogenes_serotype_1_2a_str_10-0813_1196166 | 0.9573 |
| Listeria_monocytogenes_serotype_1_2a_str_10-0934_1196170 | Listeria_monocytogenes_serotype_1_2a_str_10-0813_1196166 | 0.9656 |
| Listeria_monocytogenes_serotype_1_2a_str_10-0933_1196169 | Listeria_monocytogenes_serotype_1_2a_str_10-0813_1196166 | 0.9656 |
| Listeria_monocytogenes_serotype_1_2a_str_10-0815_1196188 | Listeria_monocytogenes_serotype_1_2a_str_10-0813_1196166 | 0.9498 |
| Listeria_monocytogenes_serotype_1_2a_str_10-0814_1196187 | Listeria_monocytogenes_serotype_1_2a_str_10-0813_1196166 | 0.9544 |
| Listeria_monocytogenes_serotype_1_2a_str_10-0813_1196166 | Listeria_monocytogenes_serotype_1_2a_str_10-0813_1196166 | 0.067  |
| Listeria_welshimeri_1643                                 | Listeria_monocytogenes_serotype_1_2a_str_10-0814_1196187 | 0.8645 |
| Listeria_welshimeri_serovar_6b_str_SLCC5334_386043       | Listeria_monocytogenes_serotype_1_2a_str_10-0814_1196187 | 0.8641 |
| Listeria_seeligeri_serovar_1_2b_str_SLCC3954_683837      | Listeria_monocytogenes_serotype_1_2a_str_10-0814_1196187 | 0.8706 |
| Listeria_seeligeri_FSL_S4-171_702452                     | Listeria_monocytogenes_serotype_1_2a_str_10-0814_1196187 | 0.8109 |
| Listeria_seeligeri_FSL_N1-067_702453                     | Listeria_monocytogenes_serotype_1_2a_str_10-0814_1196187 | 0.8325 |
| Listeria_seeligeri_1640_v1                               | Listeria_monocytogenes_serotype_1_2a_str_10-0814_1196187 | 0.868  |
| Listeria_seeligeri_1640                                  | Listeria_monocytogenes_serotype_1_2a_str_10-0814_1196187 | 0.8653 |
| Listeria_monocytogenes_WSLC1042_1457188                  | Listeria_monocytogenes_serotype_1_2a_str_10-0814_1196187 | 0.9168 |
| Listeria_monocytogenes_WSLC1001_1457187                  | Listeria_monocytogenes_serotype_1_2a_str_10-0814_1196187 | 0.9517 |
| Listeria_monocytogenes_SLCC7179_879090                   | Listeria_monocytogenes_serotype_1_2a_str_10-0814_1196187 | 0.9482 |
| Listeria_monocytogenes_SLCC5850_882096                   | Listeria_monocytogenes_serotype_1_2a_str_10-0814_1196187 | 0.9518 |
| Listeria_monocytogenes_SLCC2755_932919                   | Listeria_monocytogenes_serotype_1_2a_str_10-0814_1196187 | 0.9178 |
| Listeria_monocytogenes_SLCC2540_879089                   | Listeria_monocytogenes_serotype_1_2a_str_10-0814_1196187 | 0.9349 |
| Listeria_monocytogenes_SLCC2479_882020                   | Listeria_monocytogenes_serotype_1_2a_str_10-0814_1196187 | 0.9509 |
| Listeria_monocytogenes_SLCC2378_879088                   | Listeria_monocytogenes_serotype_1_2a_str_10-0814_1196187 | 0.9178 |
| Listeria_monocytogenes_SLCC2376_882097                   | Listeria_monocytogenes_serotype_1_2a_str_10-0814_1196187 | 0.9216 |
| Listeria_monocytogenes_SLCC2372_932920                   | Listeria_monocytogenes_serotype_1_2a_str_10-0814_1196187 | 0.9439 |
| Listeria_monocytogenes_serotype_4b_str_LL195_1230340     | Listeria_monocytogenes_serotype_1_2a_str_10-0814_1196187 | 0.9229 |
| Listeria_monocytogenes_serotype_4b_str_LIS0087_1134669   | Listeria_monocytogenes_serotype_1_2a_str_10-0814_1196187 | 0.9341 |
| Listeria_monocytogenes_serotype_4b_str_F2365_265669      | Listeria_monocytogenes_serotype_1_2a_str_10-0814_1196187 | 0.9229 |
| Listeria_monocytogenes_serotype_4b_str_CLIP_80459_568819 | Listeria_monocytogenes_serotype_1_2a_str_10-0814_1196187 | 0.9296 |
| Listeria_monocytogenes_serotype_4b_str_81-0861_1196161   | Listeria_monocytogenes_serotype_1_2a_str_10-0814_1196187 | 0.9139 |
| Listeria_monocytogenes_serotype_4b_str_81-0592_1196160   | Listeria_monocytogenes_serotype_1_2a_str_10-0814_1196187 | 0.9149 |
| Listeria_monocytogenes_serotype_4b_str_81-0558_1196159   | Listeria_monocytogenes_serotype_1_2a_str_10-0814_1196187 | 0.9152 |
| Listeria_monocytogenes_serotype_4b_str_10-0809_1196162   | Listeria_monocytogenes_serotype_1_2a_str_10-0814_1196187 | 0.9149 |
| Listeria_monocytogenes_serotype_4b_str_02-6680_1196175   | Listeria_monocytogenes_serotype_1_2a_str_10-0814_1196187 | 0.9267 |
| Listeria_monocytogenes_serotype_4b_str_02-6679_1196174   | Listeria_monocytogenes_serotype_1_2a_str_10-0814_1196187 | 0.9267 |
| Listeria_monocytogenes_serotype_4b_str_02-1792_1196173   | Listeria_monocytogenes_serotype_1_2a_str_10-0814_1196187 | 0.9164 |
| Listeria_monocytogenes_serotype_4b_str_02-1289_1196172   | Listeria_monocytogenes_serotype_1_2a_str_10-0814_1196187 | 0.9164 |
| Listeria_monocytogenes_serotype_4b_str_02-1103_1196171   | Listeria_monocytogenes_serotype_1_2a_str_10-0814_1196187 | 0.9164 |
| Listeria_monocytogenes_serotype_3c_str_10-5027_1196195   | Listeria_monocytogenes_serotype_1_2a_str_10-0814_1196187 | 0.9538 |
| Listeria_monocytogenes_serotype_1_2c_str_10-5026_1196194 | Listeria_monocytogenes_serotype_1_2a_str_10-0814_1196187 | 0.9542 |
| Listeria_monocytogenes_serotype_1_2c_str_10-5025_1196193 | Listeria_monocytogenes_serotype_1_2a_str_10-0814_1196187 | 0.9542 |
| Listeria_monocytogenes_serotype_1_2b_str_10-0811_1196164 | Listeria_monocytogenes_serotype_1_2a_str_10-0814_1196187 | 0.9349 |
| Listeria_monocytogenes_serotype_1_2b_str_10-0810_1196163 | Listeria_monocytogenes_serotype_1_2a_str_10-0814_1196187 | 0.9349 |
| Listeria_monocytogenes_serotype_1_2a_str_99-6370_1196179 | Listeria_monocytogenes_serotype_1_2a_str_10-0814_1196187 | 0.9938 |
| Listeria_monocytogenes_serotype_1_2a_str_98-2035_1196178 | Listeria_monocytogenes_serotype_1_2a_str_10-0814_1196187 | 0.9938 |
| Listeria_monocytogenes_serotype_1_2a_str_95-0093_1196177 | Listeria_monocytogenes_serotype_1_2a_str_10-0814_1196187 | 0.9982 |
| Listeria_monocytogenes_serotype_1_2a_str_88-0478_1196176 | Listeria_monocytogenes_serotype_1_2a_str_10-0814_1196187 | 0.9938 |
| Listeria_monocytogenes_serotype_1_2a_str_10-5024_1196192 | Listeria_monocytogenes_serotype_1_2a_str_10-0814_1196187 | 0.9996 |
| Listeria_monocytogenes_serotype_1_2a_str_10-4758_1196168 | Listeria_monocytogenes_serotype_1_2a_str_10-0814_1196187 | 0.95   |

|                                                          |                                                          |          |
|----------------------------------------------------------|----------------------------------------------------------|----------|
| Listeria_monocytogenes_serotype_1_2c_str_10-5025_1196193 | Listeria_monocytogenes_serotype_1_2a_str_10-0815_1196188 | 0.9497   |
| Listeria_monocytogenes_serotype_1_2b_str_10-0811_1196164 | Listeria_monocytogenes_serotype_1_2a_str_10-0815_1196188 | 0.9396   |
| Listeria_monocytogenes_serotype_1_2b_str_10-0810_1196163 | Listeria_monocytogenes_serotype_1_2a_str_10-0815_1196188 | 0.9396   |
| Listeria_monocytogenes_serotype_1_2a_str_99-6370_1196179 | Listeria_monocytogenes_serotype_1_2a_str_10-0815_1196188 | 0.9982   |
| Listeria_monocytogenes_serotype_1_2a_str_98-2035_1196178 | Listeria_monocytogenes_serotype_1_2a_str_10-0815_1196188 | 0.9982   |
| Listeria_monocytogenes_serotype_1_2a_str_95-0093_1196177 | Listeria_monocytogenes_serotype_1_2a_str_10-0815_1196188 | 0.9934   |
| Listeria_monocytogenes_serotype_1_2a_str_88-0478_1196176 | Listeria_monocytogenes_serotype_1_2a_str_10-0815_1196188 | 0.989    |
| Listeria_monocytogenes_serotype_1_2a_str_10-5024_1196192 | Listeria_monocytogenes_serotype_1_2a_str_10-0815_1196188 | 0.9949   |
| Listeria_monocytogenes_serotype_1_2a_str_10-4758_1196168 | Listeria_monocytogenes_serotype_1_2a_str_10-0815_1196188 | 0.9458   |
| Listeria_monocytogenes_serotype_1_2a_str_10-4754_1196167 | Listeria_monocytogenes_serotype_1_2a_str_10-0815_1196188 | 0.9462   |
| Listeria_monocytogenes_serotype_1_2a_str_10-1321_1196191 | Listeria_monocytogenes_serotype_1_2a_str_10-0815_1196188 | 0.9949   |
| Listeria_monocytogenes_serotype_1_2a_str_10-1047_1196190 | Listeria_monocytogenes_serotype_1_2a_str_10-0815_1196188 | 0.992    |
| Listeria_monocytogenes_serotype_1_2a_str_10-1046_1196189 | Listeria_monocytogenes_serotype_1_2a_str_10-0815_1196188 | 0.992    |
| Listeria_monocytogenes_serotype_1_2a_str_10-0934_1196170 | Listeria_monocytogenes_serotype_1_2a_str_10-0815_1196188 | 0.9447   |
| Listeria_monocytogenes_serotype_1_2a_str_10-0933_1196169 | Listeria_monocytogenes_serotype_1_2a_str_10-0815_1196188 | 0.9447   |
| Listeria_monocytogenes_serotype_1_2a_str_10-0815_1196188 | Listeria_monocytogenes_serotype_1_2a_str_10-0815_1196188 | 0.0700   |
| Listeria_welshimeri_1643                                 | Listeria_monocytogenes_serotype_1_2a_str_10-0933_1196169 | 0.8816   |
| Listeria_welshimeri_serovar_6b_str_SLCC5334_386043       | Listeria_monocytogenes_serotype_1_2a_str_10-0933_1196169 | 0.8813   |
| Listeria_seeligeri_serovar_1_2b_str_SLCC3954_683837      | Listeria_monocytogenes_serotype_1_2a_str_10-0933_1196169 | 0.896    |
| Listeria_seeligeri_FSL_S4-171_702452                     | Listeria_monocytogenes_serotype_1_2a_str_10-0933_1196169 | 0.8268   |
| Listeria_seeligeri_FSL_N1-067_702453                     | Listeria_monocytogenes_serotype_1_2a_str_10-0933_1196169 | 0.8358   |
| Listeria_seeligeri_1640_v1                               | Listeria_monocytogenes_serotype_1_2a_str_10-0933_1196169 | 0.8951   |
| Listeria_seeligeri_1640                                  | Listeria_monocytogenes_serotype_1_2a_str_10-0933_1196169 | 0.8835   |
| Listeria_monocytogenes_WSLC1042_1457188                  | Listeria_monocytogenes_serotype_1_2a_str_10-0933_1196169 | 0.9419   |
| Listeria_monocytogenes_WSLC1001_1457187                  | Listeria_monocytogenes_serotype_1_2a_str_10-0933_1196169 | 0.9682   |
| Listeria_monocytogenes_SLCC7179_879090                   | Listeria_monocytogenes_serotype_1_2a_str_10-0933_1196169 | 0.9675   |
| Listeria_monocytogenes_SLCC5850_882096                   | Listeria_monocytogenes_serotype_1_2a_str_10-0933_1196169 | 0.9727   |
| Listeria_monocytogenes_SLCC2755_932919                   | Listeria_monocytogenes_serotype_1_2a_str_10-0933_1196169 | 0.9409   |
| Listeria_monocytogenes_SLCC2540_879089                   | Listeria_monocytogenes_serotype_1_2a_str_10-0933_1196169 | 0.9464   |
| Listeria_monocytogenes_SLCC2479_882020                   | Listeria_monocytogenes_serotype_1_2a_str_10-0933_1196169 | 0.9563   |
| Listeria_monocytogenes_SLCC2378_879088                   | Listeria_monocytogenes_serotype_1_2a_str_10-0933_1196169 | 0.943    |
| Listeria_monocytogenes_SLCC2376_882097                   | Listeria_monocytogenes_serotype_1_2a_str_10-0933_1196169 | 0.9529   |
| Listeria_monocytogenes_SLCC2372_932920                   | Listeria_monocytogenes_serotype_1_2a_str_10-0933_1196169 | 0.9487   |
| Listeria_monocytogenes_serotype_4b_str_LL195_1230340     | Listeria_monocytogenes_serotype_1_2a_str_10-0933_1196169 | 0.9484   |
| Listeria_monocytogenes_serotype_4b_str_LIS0087_1134669   | Listeria_monocytogenes_serotype_1_2a_str_10-0933_1196169 | 0.9491   |
| Listeria_monocytogenes_serotype_4b_str_F2365_265669      | Listeria_monocytogenes_serotype_1_2a_str_10-0933_1196169 | 0.9484   |
| Listeria_monocytogenes_serotype_4b_str_CLIP_80459_568819 | Listeria_monocytogenes_serotype_1_2a_str_10-0933_1196169 | 0.9534   |
| Listeria_monocytogenes_serotype_4b_str_81-0861_1196161   | Listeria_monocytogenes_serotype_1_2a_str_10-0933_1196169 | 0.9322   |
| Listeria_monocytogenes_serotype_4b_str_81-0592_1196160   | Listeria_monocytogenes_serotype_1_2a_str_10-0933_1196169 | 0.9333   |
| Listeria_monocytogenes_serotype_4b_str_81-0558_1196159   | Listeria_monocytogenes_serotype_1_2a_str_10-0933_1196169 | 0.9337   |
| Listeria_monocytogenes_serotype_4b_str_10-0809_1196162   | Listeria_monocytogenes_serotype_1_2a_str_10-0933_1196169 | 0.9333   |
| Listeria_monocytogenes_serotype_4b_str_02-6680_1196175   | Listeria_monocytogenes_serotype_1_2a_str_10-0933_1196169 | 0.9497   |
| Listeria_monocytogenes_serotype_4b_str_02-6679_1196174   | Listeria_monocytogenes_serotype_1_2a_str_10-0933_1196169 | 0.9497   |
| Listeria_monocytogenes_serotype_4b_str_02-1792_1196173   | Listeria_monocytogenes_serotype_1_2a_str_10-0933_1196169 | 0.9337   |
| Listeria_monocytogenes_serotype_4b_str_02-1289_1196172   | Listeria_monocytogenes_serotype_1_2a_str_10-0933_1196169 | 0.9337   |
| Listeria_monocytogenes_serotype_4b_str_02-1103_1196171   | Listeria_monocytogenes_serotype_1_2a_str_10-0933_1196169 | 0.9337   |
| Listeria_monocytogenes_serotype_3c_str_10-5027_1196195   | Listeria_monocytogenes_serotype_1_2a_str_10-0933_1196169 | 0.9555   |
| Listeria_monocytogenes_serotype_1_2c_str_10-5026_1196194 | Listeria_monocytogenes_serotype_1_2a_str_10-0933_1196169 | 0.9563   |
| Listeria_monocytogenes_serotype_1_2c_str_10-5025_1196193 | Listeria_monocytogenes_serotype_1_2a_str_10-0933_1196169 | 0.9563   |
| Listeria_monocytogenes_serotype_1_2b_str_10-0811_1196164 | Listeria_monocytogenes_serotype_1_2a_str_10-0933_1196169 | 0.9356   |
| Listeria_monocytogenes_serotype_1_2b_str_10-0810_1196163 | Listeria_monocytogenes_serotype_1_2a_str_10-0933_1196169 | 0.9356</ |

Listeria\_monocytogenes\_serotype\_4b\_str\_02-1289\_1196172  
Listeria\_monocytogenes\_serotype\_4b\_str\_02-1103\_1196171  
Listeria\_monocytogenes\_serotype\_3c\_str\_10-5027\_1196195  
Listeria\_monocytogenes\_serotype\_1\_2c\_str\_10-5026\_1196194  
Listeria\_monocytogenes\_serotype\_1\_2c\_str\_10-5025\_1196193  
Listeria\_monocytogenes\_serotype\_1\_2b\_str\_10-0811\_1196164  
Listeria\_monocytogenes\_serotype\_1\_2b\_str\_10-0810\_1196163  
Listeria\_monocytogenes\_serotype\_1\_2a\_str\_99-6370\_1196179  
Listeria\_monocytogenes\_serotype\_1\_2a\_str\_98-2035\_1196178  
Listeria\_monocytogenes\_serotype\_1\_2a\_str\_95-0093\_1196177  
Listeria\_monocytogenes\_serotype\_1\_2a\_str\_88-0478\_1196176  
Listeria\_monocytogenes\_serotype\_1\_2a\_str\_10-5024\_1196192  
Listeria\_monocytogenes\_serotype\_1\_2a\_str\_10-4758\_1196168  
Listeria\_monocytogenes\_serotype\_1\_2a\_str\_10-4754\_1196167  
Listeria\_monocytogenes\_serotype\_1\_2a\_str\_10-1321\_1196191  
Listeria\_monocytogenes\_serotype\_1\_2a\_str\_10-1047\_1196190  
Listeria\_monocytogenes\_serotype\_1\_2a\_str\_10-1046\_1196189  
Listeria\_monocytogenes\_serotype\_1\_2a\_str\_10-0934\_1196170  
Listeria\_welshimeri\_1643  
Listeria\_welshimeri\_serovar\_6b\_str\_SLCC5334\_386043  
Listeria\_seeligeri\_serovar\_1\_2b\_str\_SLCC3954\_683837  
Listeria\_seeligeri\_FSL\_S4-171\_702452  
Listeria\_seeligeri\_FSL\_N1-067\_702453  
Listeria\_seeligeri\_1640\_v1  
Listeria\_seeligeri\_1640  
Listeria\_monocytogenes\_WSLC1042\_1457188  
Listeria\_monocytogenes\_WSLC1001\_1457187  
Listeria\_monocytogenes\_SLCC7179\_879090  
Listeria\_monocytogenes\_SLCC5850\_882096  
Listeria\_monocytogenes\_SLCC2755\_932919  
Listeria\_monocytogenes\_SLCC2540\_879089  
Listeria\_monocytogenes\_SLCC2479\_882020  
Listeria\_monocytogenes\_SLCC2378\_879088  
Listeria\_monocytogenes\_SLCC2376\_882097  
Listeria\_monocytogenes\_SLCC2372\_932920  
Listeria\_monocytogenes\_serotype\_4b\_str\_LL195\_1230340  
Listeria\_monocytogenes\_serotype\_4b\_str\_LIS0087\_1134669  
Listeria\_monocytogenes\_serotype\_4b\_str\_F2365\_265669  
Listeria\_monocytogenes\_serotype\_4b\_str\_CLIP\_80459\_568819  
Listeria\_monocytogenes\_serotype\_4b\_str\_81-0861\_1196161  
Listeria\_monocytogenes\_serotype\_4b\_str\_81-0592\_1196160  
Listeria\_monocytogenes\_serotype\_4b\_str\_81-0558\_1196159  
Listeria\_monocytogenes\_serotype\_4b\_str\_10-0809\_1196162  
Listeria\_monocytogenes\_serotype\_4b\_str\_02-6680\_1196175  
Listeria\_monocytogenes\_serotype\_4b\_str\_02-6679\_1196174  
Listeria\_monocytogenes\_serotype\_4b\_str\_02-1792\_1196173  
Listeria\_monocytogenes\_serotype\_4b\_str\_02-1289\_1196172  
Listeria\_monocytogenes\_serotype\_4b\_str\_02-1103\_1196171  
Listeria\_monocytogenes\_serotype\_3c\_str\_10-5027\_1196195  
Listeria\_monocytogenes\_serotype\_1\_2c\_str\_10-5026\_1196194  
Listeria\_monocytogenes\_serotype\_1\_2c\_str\_10-5025\_1196193  
Listeria\_monocytogenes\_serotype\_1\_2b\_str\_10-0811\_1196164  
Listeria\_monocytogenes\_serotype\_1\_2b\_str\_10-0810\_1196163  
Listeria\_monocytogenes\_serotype\_1\_2a\_str\_99-6370\_1196179  
Listeria\_monocytogenes\_serotype\_1\_2a\_str\_98-2035\_1196178  
Listeria\_monocytogenes\_serotype\_1\_2a\_str\_95-0093\_1196177  
Listeria\_monocytogenes\_serotype\_1\_2a\_str\_88-0478\_1196176  
Listeria\_monocytogenes\_serotype\_1\_2a\_str\_10-5024\_1196192  
Listeria\_monocytogenes\_serotype\_1\_2a\_str\_10-4758\_1196168  
Listeria\_monocytogenes\_serotype\_1\_2a\_str\_10-4754\_1196167  
Listeria\_monocytogenes\_serotype\_1\_2a\_str\_10-1321\_1196191  
Listeria\_monocytogenes\_serotype\_1\_2a\_str\_10-1047\_1196190  
Listeria\_monocytogenes\_serotype\_1\_2a\_str\_10-1046\_1196189  
Listeria\_welshimeri\_1643  
Listeria\_welshimeri\_serovar\_6b\_str\_SLCC5334\_386043  
Listeria\_seeligeri\_serovar\_1\_2b\_str\_SLCC3954\_683837  
Listeria\_seeligeri\_FSL\_S4-171\_702452  
Listeria\_seeligeri\_FSL\_N1-067\_702453  
Listeria\_seeligeri\_1640\_v1  
Listeria\_seeligeri\_1640  
Listeria\_monocytogenes\_WSLC1042\_1457188  
Listeria\_monocytogenes\_WSLC1001\_1457187  
Listeria\_monocytogenes\_SLCC7179\_879090  
Listeria\_monocytogenes\_SLCC5850\_882096  
Listeria\_monocytogenes\_SLCC2755\_932919  
Listeria\_monocytogenes\_SLCC2540\_879089  
Listeria\_monocytogenes\_SLCC2479\_882020  
Listeria\_monocytogenes\_SLCC2378\_879088  
Listeria\_monocytogenes\_SLCC2376\_882097  
Listeria\_monocytogenes\_SLCC2372\_932920  
Listeria\_monocytogenes\_serotype\_4b\_str\_LL195\_1230340  
Listeria\_monocytogenes\_serotype\_4b\_str\_LIS0087\_1134669  
Listeria\_monocytogenes\_serotype\_4b\_str\_F2365\_265669  
Listeria\_monocytogenes\_serotype\_4b\_str\_CLIP\_80459\_568819  
Listeria\_monocytogenes\_serotype\_4b\_str\_81-0861\_1196161  
Listeria\_monocytogenes\_serotype\_4b\_str\_81-0592\_1196160  
Listeria\_monocytogenes\_serotype\_4b\_str\_81-0558\_1196159  
Listeria\_monocytogenes\_serotype\_4b\_str\_10-0809\_1196162  
Listeria\_monocytogenes\_serotype\_4b\_str\_02-6680\_1196175  
Listeria\_monocytogenes\_serotype\_4b\_str\_02-6679\_1196174  
Listeria\_monocytogenes\_serotype\_4b\_str\_02-1792\_1196173

[illegible]

0.9337  
0.9337  
0.9555  
0.9563  
0.9563  
0.9356  
0.9356  
0.9433  
0.9433  
0.9494  
0.9482  
0.9494  
0.9666  
0.9669  
0.9494  
0.9501  
0.9501  
0.0658  
0.8647  
0.8644  
0.8709  
0.8111  
0.8316  
0.8683  
0.8656  
0.9171  
0.9524  
0.9489  
0.9525  
0.9181  
0.9345  
0.9508  
0.9181  
0.9223  
0.9439  
0.9232  
0.9344  
0.9232  
0.9299  
0.9145  
0.9156  
0.9159  
0.9156  
0.927  
0.927  
0.9163  
0.9163  
0.9163  
0.9527  
0.9534  
0.9534  
0.9356  
0.9356  
0.9905  
0.9905  
0.9956  
0.9949  
0.9967  
0.9507  
0.9511  
0.9967  
1  
0.0665  
0.8647  
0.8644  
0.8709  
0.8111  
0.8316  
0.8683  
0.8656  
0.9171  
0.9524  
0.9489  
0.9525  
0.9181  
0.9345  
0.9508  
0.9181  
0.9223  
0.9439  
0.9232  
0.9344  
0.9232  
0.9299  
0.9145  
0.9156  
0.9159  
0.9156  
0.927  
0.927  
0.9163

Listeria\_monocytogenes\_serotype\_4b\_str\_02-1289\_1196172  
Listeria\_monocytogenes\_serotype\_4b\_str\_02-1103\_1196171  
Listeria\_monocytogenes\_serotype\_3c\_str\_10-5027\_1196195  
Listeria\_monocytogenes\_serotype\_1\_2c\_str\_10-5026\_1196194  
Listeria\_monocytogenes\_serotype\_1\_2c\_str\_10-5025\_1196193  
Listeria\_monocytogenes\_serotype\_1\_2b\_str\_10-0811\_1196164  
Listeria\_monocytogenes\_serotype\_1\_2b\_str\_10-0810\_1196163  
Listeria\_monocytogenes\_serotype\_1\_2a\_str\_99-6370\_1196179  
Listeria\_monocytogenes\_serotype\_1\_2a\_str\_98-2035\_1196178  
Listeria\_monocytogenes\_serotype\_1\_2a\_str\_95-0093\_1196177  
Listeria\_monocytogenes\_serotype\_1\_2a\_str\_88-0478\_1196176  
Listeria\_monocytogenes\_serotype\_1\_2a\_str\_10-5024\_1196192  
Listeria\_monocytogenes\_serotype\_1\_2a\_str\_10-4758\_1196168  
Listeria\_monocytogenes\_serotype\_1\_2a\_str\_10-4754\_1196167  
Listeria\_monocytogenes\_serotype\_1\_2a\_str\_10-1321\_1196191  
Listeria\_monocytogenes\_serotype\_1\_2a\_str\_10-1047\_1196190  
Listeria\_welshimeri\_1643  
Listeria\_welshimeri\_serovar\_6b\_str\_SLCC5334\_386043  
Listeria\_seeligeri\_serovar\_1\_2b\_str\_SLCC3954\_683837  
Listeria\_seeligeri\_FSL\_S4-171\_702452  
Listeria\_seeligeri\_FSL\_N1-067\_702453  
Listeria\_seeligeri\_1640\_v1  
Listeria\_seeligeri\_1640  
Listeria\_monocytogenes\_WSLC1042\_1457188  
Listeria\_monocytogenes\_WSLC1001\_1457187  
Listeria\_monocytogenes\_SLCC7179\_879090  
Listeria\_monocytogenes\_SLCC5850\_882096  
Listeria\_monocytogenes\_SLCC2755\_932919  
Listeria\_monocytogenes\_SLCC2540\_879089  
Listeria\_monocytogenes\_SLCC2479\_882020  
Listeria\_monocytogenes\_SLCC2378\_879088  
Listeria\_monocytogenes\_SLCC2376\_882097  
Listeria\_monocytogenes\_SLCC2372\_932920  
Listeria\_monocytogenes\_serotype\_4b\_str\_LL195\_1230340  
Listeria\_monocytogenes\_serotype\_4b\_str\_LIS0087\_1134669  
Listeria\_monocytogenes\_serotype\_4b\_str\_F2365\_265669  
Listeria\_monocytogenes\_serotype\_4b\_str\_CLIP\_80459\_568819  
Listeria\_monocytogenes\_serotype\_4b\_str\_81-0861\_1196161  
Listeria\_monocytogenes\_serotype\_4b\_str\_81-0592\_1196160  
Listeria\_monocytogenes\_serotype\_4b\_str\_81-0558\_1196159  
Listeria\_monocytogenes\_serotype\_4b\_str\_10-0809\_1196162  
Listeria\_monocytogenes\_serotype\_4b\_str\_02-6680\_1196175  
Listeria\_monocytogenes\_serotype\_4b\_str\_02-6679\_1196174  
Listeria\_monocytogenes\_serotype\_4b\_str\_02-1792\_1196173  
Listeria\_monocytogenes\_serotype\_4b\_str\_02-1289\_1196172  
Listeria\_monocytogenes\_serotype\_4b\_str\_02-1103\_1196171  
Listeria\_monocytogenes\_serotype\_3c\_str\_10-5027\_1196195  
Listeria\_monocytogenes\_serotype\_1\_2c\_str\_10-5026\_1196194  
Listeria\_monocytogenes\_serotype\_1\_2c\_str\_10-5025\_1196193  
Listeria\_monocytogenes\_serotype\_1\_2b\_str\_10-0811\_1196164  
Listeria\_monocytogenes\_serotype\_1\_2b\_str\_10-0810\_1196163  
Listeria\_monocytogenes\_serotype\_1\_2a\_str\_99-6370\_1196179  
Listeria\_monocytogenes\_serotype\_1\_2a\_str\_98-2035\_1196178  
Listeria\_monocytogenes\_serotype\_1\_2a\_str\_95-0093\_1196177  
Listeria\_monocytogenes\_serotype\_1\_2a\_str\_88-0478\_1196176  
Listeria\_monocytogenes\_serotype\_1\_2a\_str\_10-5024\_1196192  
Listeria\_monocytogenes\_serotype\_1\_2a\_str\_10-4758\_1196168  
Listeria\_monocytogenes\_serotype\_1\_2a\_str\_10-4754\_1196167  
Listeria\_monocytogenes\_serotype\_1\_2a\_str\_10-1321\_1196191  
Listeria\_welshimeri\_1643  
Listeria\_welshimeri\_serovar\_6b\_str\_SLCC5334\_386043  
Listeria\_seeligeri\_serovar\_1\_2b\_str\_SLCC3954\_683837  
Listeria\_seeligeri\_FSL\_S4-171\_702452  
Listeria\_seeligeri\_FSL\_N1-067\_702453  
Listeria\_seeligeri\_1640\_v1  
Listeria\_seeligeri\_1640  
Listeria\_monocytogenes\_WSLC1042\_1457188  
Listeria\_monocytogenes\_WSLC1001\_1457187  
Listeria\_monocytogenes\_SLCC7179\_879090  
Listeria\_monocytogenes\_SLCC5850\_882096  
Listeria\_monocytogenes\_SLCC2755\_932919  
Listeria\_monocytogenes\_SLCC2540\_879089  
Listeria\_monocytogenes\_SLCC2479\_882020  
Listeria\_monocytogenes\_SLCC2378\_879088  
Listeria\_monocytogenes\_SLCC2376\_882097  
Listeria\_monocytogenes\_SLCC2372\_932920  
Listeria\_monocytogenes\_serotype\_4b\_str\_LL195\_1230340  
Listeria\_monocytogenes\_serotype\_4b\_str\_LIS0087\_1134669  
Listeria\_monocytogenes\_serotype\_4b\_str\_F2365\_265669  
Listeria\_monocytogenes\_serotype\_4b\_str\_CLIP\_80459\_568819  
Listeria\_monocytogenes\_serotype\_4b\_str\_81-0861\_1196161  
Listeria\_monocytogenes\_serotype\_4b\_str\_81-0592\_1196160  
Listeria\_monocytogenes\_serotype\_4b\_str\_81-0558\_1196159  
Listeria\_monocytogenes\_serotype\_4b\_str\_10-0809\_1196162  
Listeria\_monocytogenes\_serotype\_4b\_str\_02-6680\_1196175  
Listeria\_monocytogenes\_serotype\_4b\_str\_02-6679\_1196174  
Listeria\_monocytogenes\_serotype\_4b\_str\_02-1792\_1196173  
Listeria\_monocytogenes\_serotype\_4b\_str\_02-1289\_1196172  
Listeria\_monocytogenes\_serotype\_4b\_str\_02-1103\_1196171  
Listeria\_monocytogenes\_serotype\_3c\_str\_10-5027\_1196195  
Listeria\_monocytogenes\_serotype\_1\_2c\_str\_10-5026\_1196194

[illegible]



Listeria\_monocytogenes\_serotype\_1\_2c\_str\_10-5025\_1196193  
Listeria\_monocytogenes\_serotype\_1\_2b\_str\_10-0811\_1196164  
Listeria\_monocytogenes\_serotype\_1\_2b\_str\_10-0810\_1196163  
Listeria\_monocytogenes\_serotype\_1\_2a\_str\_99-6370\_1196179  
Listeria\_monocytogenes\_serotype\_1\_2a\_str\_98-2035\_1196178  
Listeria\_monocytogenes\_serotype\_1\_2a\_str\_95-0093\_1196177  
Listeria\_monocytogenes\_serotype\_1\_2a\_str\_88-0478\_1196176  
Listeria\_monocytogenes\_serotype\_1\_2a\_str\_10-5024\_1196192  
Listeria\_monocytogenes\_serotype\_1\_2a\_str\_10-4758\_1196168  
Listeria\_monocytogenes\_serotype\_1\_2a\_str\_10-4754\_1196167  
Listeria\_welshimeri\_1643  
Listeria\_welshimeri\_serovar\_6b\_str\_SLCC5334\_386043  
Listeria\_seeligeri\_serovar\_1\_2b\_str\_SLCC3954\_683837  
Listeria\_seeligeri\_FSL\_S4-171\_702452  
Listeria\_seeligeri\_FSL\_N1-067\_702453  
Listeria\_seeligeri\_1640\_v1  
Listeria\_seeligeri\_1640  
Listeria\_monocytogenes\_WSLC1042\_1457188  
Listeria\_monocytogenes\_WSLC1001\_1457187  
Listeria\_monocytogenes\_SLCC7179\_879090  
Listeria\_monocytogenes\_SLCC5850\_882096  
Listeria\_monocytogenes\_SLCC2755\_932919  
Listeria\_monocytogenes\_SLCC2540\_879089  
Listeria\_monocytogenes\_SLCC2479\_882020  
Listeria\_monocytogenes\_SLCC2378\_879088  
Listeria\_monocytogenes\_SLCC2376\_882097  
Listeria\_monocytogenes\_SLCC2372\_932920  
Listeria\_monocytogenes\_serotype\_4b\_str\_LL195\_1230340  
Listeria\_monocytogenes\_serotype\_4b\_str\_LIS0087\_1134669  
Listeria\_monocytogenes\_serotype\_4b\_str\_F2365\_265669  
Listeria\_monocytogenes\_serotype\_4b\_str\_CLIP\_80459\_568819  
Listeria\_monocytogenes\_serotype\_4b\_str\_81-0861\_1196161  
Listeria\_monocytogenes\_serotype\_4b\_str\_81-0592\_1196160  
Listeria\_monocytogenes\_serotype\_4b\_str\_81-0558\_1196159  
Listeria\_monocytogenes\_serotype\_4b\_str\_10-0809\_1196162  
Listeria\_monocytogenes\_serotype\_4b\_str\_02-6680\_1196175  
Listeria\_monocytogenes\_serotype\_4b\_str\_02-6679\_1196174  
Listeria\_monocytogenes\_serotype\_4b\_str\_02-1792\_1196173  
Listeria\_monocytogenes\_serotype\_4b\_str\_02-1289\_1196172  
Listeria\_monocytogenes\_serotype\_4b\_str\_02-1103\_1196171  
Listeria\_monocytogenes\_serotype\_3c\_str\_10-5027\_1196195  
Listeria\_monocytogenes\_serotype\_1\_2c\_str\_10-5026\_1196194  
Listeria\_monocytogenes\_serotype\_1\_2c\_str\_10-5025\_1196193  
Listeria\_monocytogenes\_serotype\_1\_2b\_str\_10-0811\_1196164  
Listeria\_monocytogenes\_serotype\_1\_2b\_str\_10-0810\_1196163  
Listeria\_monocytogenes\_serotype\_1\_2a\_str\_99-6370\_1196179  
Listeria\_monocytogenes\_serotype\_1\_2a\_str\_98-2035\_1196178  
Listeria\_monocytogenes\_serotype\_1\_2a\_str\_95-0093\_1196177  
Listeria\_monocytogenes\_serotype\_1\_2a\_str\_88-0478\_1196176  
Listeria\_monocytogenes\_serotype\_1\_2a\_str\_10-5024\_1196192  
Listeria\_monocytogenes\_serotype\_1\_2a\_str\_10-4758\_1196168  
Listeria\_welshimeri\_1643  
Listeria\_welshimeri\_serovar\_6b\_str\_SLCC5334\_386043  
Listeria\_seeligeri\_serovar\_1\_2b\_str\_SLCC3954\_683837  
Listeria\_seeligeri\_FSL\_S4-171\_702452  
Listeria\_seeligeri\_FSL\_N1-067\_702453  
Listeria\_seeligeri\_1640\_v1  
Listeria\_seeligeri\_1640  
Listeria\_monocytogenes\_WSLC1042\_1457188  
Listeria\_monocytogenes\_WSLC1001\_1457187  
Listeria\_monocytogenes\_SLCC7179\_879090  
Listeria\_monocytogenes\_SLCC5850\_882096  
Listeria\_monocytogenes\_SLCC2755\_932919  
Listeria\_monocytogenes\_SLCC2540\_879089  
Listeria\_monocytogenes\_SLCC2479\_882020  
Listeria\_monocytogenes\_SLCC2378\_879088  
Listeria\_monocytogenes\_SLCC2376\_882097  
Listeria\_monocytogenes\_SLCC2372\_932920  
Listeria\_monocytogenes\_serotype\_4b\_str\_LL195\_1230340  
Listeria\_monocytogenes\_serotype\_4b\_str\_LIS0087\_1134669  
Listeria\_monocytogenes\_serotype\_4b\_str\_F2365\_265669  
Listeria\_monocytogenes\_serotype\_4b\_str\_CLIP\_80459\_568819  
Listeria\_monocytogenes\_serotype\_4b\_str\_81-0861\_1196161  
Listeria\_monocytogenes\_serotype\_4b\_str\_81-0592\_1196160  
Listeria\_monocytogenes\_serotype\_4b\_str\_81-0558\_1196159  
Listeria\_monocytogenes\_serotype\_4b\_str\_10-0809\_1196162  
Listeria\_monocytogenes\_serotype\_4b\_str\_02-6680\_1196175  
Listeria\_monocytogenes\_serotype\_4b\_str\_02-6679\_1196174  
Listeria\_monocytogenes\_serotype\_4b\_str\_02-1792\_1196173  
Listeria\_monocytogenes\_serotype\_4b\_str\_02-1289\_1196172  
Listeria\_monocytogenes\_serotype\_4b\_str\_02-1103\_1196171  
Listeria\_monocytogenes\_serotype\_3c\_str\_10-5027\_1196195  
Listeria\_monocytogenes\_serotype\_1\_2c\_str\_10-5026\_1196194  
Listeria\_monocytogenes\_serotype\_1\_2c\_str\_10-5025\_1196193  
Listeria\_monocytogenes\_serotype\_1\_2b\_str\_10-0811\_1196164  
Listeria\_monocytogenes\_serotype\_1\_2b\_str\_10-0810\_1196163  
Listeria\_monocytogenes\_serotype\_1\_2a\_str\_99-6370\_1196179  
Listeria\_monocytogenes\_serotype\_1\_2a\_str\_98-2035\_1196178  
Listeria\_monocytogenes\_serotype\_1\_2a\_str\_95-0093\_1196177  
Listeria\_monocytogenes\_serotype\_1\_2a\_str\_88-0478\_1196176  
Listeria\_monocytogenes\_serotype\_1\_2a\_str\_10-5024\_1196192

[illegible]



|                                                          |                                                          |        |
|----------------------------------------------------------|----------------------------------------------------------|--------|
| Listeria_welshimeri_1643                                 | Listeria_monocytogenes_serotype_1_2a_str_88-0478_1196176 | 0.8628 |
| Listeria_welshimeri_serovar_6b_str_SLCC5334_386043       | Listeria_monocytogenes_serotype_1_2a_str_88-0478_1196176 | 0.8622 |
| Listeria_seeligeri_serovar_1_2b_str_SLCC3954_683837      | Listeria_monocytogenes_serotype_1_2a_str_88-0478_1196176 | 0.869  |
| Listeria_seeligeri_FSL_S4-171_702452                     | Listeria_monocytogenes_serotype_1_2a_str_88-0478_1196176 | 0.8096 |
| Listeria_seeligeri_FSL_N1-067_702453                     | Listeria_monocytogenes_serotype_1_2a_str_88-0478_1196176 | 0.8309 |
| Listeria_seeligeri_1640_v1                               | Listeria_monocytogenes_serotype_1_2a_str_88-0478_1196176 | 0.8665 |
| Listeria_seeligeri_1640                                  | Listeria_monocytogenes_serotype_1_2a_str_88-0478_1196176 | 0.8641 |
| Listeria_monocytogenes_WSLC1042_1457188                  | Listeria_monocytogenes_serotype_1_2a_str_88-0478_1196176 | 0.9152 |
| Listeria_monocytogenes_WSLC1001_1457187                  | Listeria_monocytogenes_serotype_1_2a_str_88-0478_1196176 | 0.9535 |
| Listeria_monocytogenes_SLCC7179_879090                   | Listeria_monocytogenes_serotype_1_2a_str_88-0478_1196176 | 0.9478 |
| Listeria_monocytogenes_SLCC5850_882096                   | Listeria_monocytogenes_serotype_1_2a_str_88-0478_1196176 | 0.9518 |
| Listeria_monocytogenes_SLCC2755_932919                   | Listeria_monocytogenes_serotype_1_2a_str_88-0478_1196176 | 0.9166 |
| Listeria_monocytogenes_SLCC2540_879089                   | Listeria_monocytogenes_serotype_1_2a_str_88-0478_1196176 | 0.933  |
| Listeria_monocytogenes_SLCC2479_882020                   | Listeria_monocytogenes_serotype_1_2a_str_88-0478_1196176 | 0.9523 |
| Listeria_monocytogenes_SLCC2378_879088                   | Listeria_monocytogenes_serotype_1_2a_str_88-0478_1196176 | 0.9166 |
| Listeria_monocytogenes_SLCC2376_882097                   | Listeria_monocytogenes_serotype_1_2a_str_88-0478_1196176 | 0.9205 |
| Listeria_monocytogenes_SLCC2372_932920                   | Listeria_monocytogenes_serotype_1_2a_str_88-0478_1196176 | 0.9446 |
| Listeria_monocytogenes_serotype_4b_str_LL195_1230340     | Listeria_monocytogenes_serotype_1_2a_str_88-0478_1196176 | 0.9217 |
| Listeria_monocytogenes_serotype_4b_str_LIS0087_1134669   | Listeria_monocytogenes_serotype_1_2a_str_88-0478_1196176 | 0.9325 |
| Listeria_monocytogenes_serotype_4b_str_F2365_265669      | Listeria_monocytogenes_serotype_1_2a_str_88-0478_1196176 | 0.9217 |
| Listeria_monocytogenes_serotype_4b_str_CLIP_80459_568819 | Listeria_monocytogenes_serotype_1_2a_str_88-0478_1196176 | 0.9284 |
| Listeria_monocytogenes_serotype_4b_str_81-0861_1196161   | Listeria_monocytogenes_serotype_1_2a_str_88-0478_1196176 | 0.9135 |
| Listeria_monocytogenes_serotype_4b_str_81-0592_1196160   | Listeria_monocytogenes_serotype_1_2a_str_88-0478_1196176 | 0.9145 |
| Listeria_monocytogenes_serotype_4b_str_81-0558_1196159   | Listeria_monocytogenes_serotype_1_2a_str_88-0478_1196176 | 0.9152 |
| Listeria_monocytogenes_serotype_4b_str_10-0809_1196162   | Listeria_monocytogenes_serotype_1_2a_str_88-0478_1196176 | 0.9145 |
| Listeria_monocytogenes_serotype_4b_str_02-6680_1196175   | Listeria_monocytogenes_serotype_1_2a_str_88-0478_1196176 | 0.9252 |
| Listeria_monocytogenes_serotype_4b_str_02-6679_1196174   | Listeria_monocytogenes_serotype_1_2a_str_88-0478_1196176 | 0.9252 |
| Listeria_monocytogenes_serotype_4b_str_02-1792_1196173   | Listeria_monocytogenes_serotype_1_2a_str_88-0478_1196176 | 0.916  |
| Listeria_monocytogenes_serotype_4b_str_02-1289_1196172   | Listeria_monocytogenes_serotype_1_2a_str_88-0478_1196176 | 0.916  |
| Listeria_monocytogenes_serotype_4b_str_02-1103_1196171   | Listeria_monocytogenes_serotype_1_2a_str_88-0478_1196176 | 0.916  |
| Listeria_monocytogenes_serotype_3c_str_10-5027_1196195   | Listeria_monocytogenes_serotype_1_2a_str_88-0478_1196176 | 0.9523 |
| Listeria_monocytogenes_serotype_1_2c_str_10-5026_1196194 | Listeria_monocytogenes_serotype_1_2a_str_88-0478_1196176 | 0.9538 |
| Listeria_monocytogenes_serotype_1_2c_str_10-5025_1196193 | Listeria_monocytogenes_serotype_1_2a_str_88-0478_1196176 | 0.9538 |
| Listeria_monocytogenes_serotype_1_2b_str_10-0811_1196164 | Listeria_monocytogenes_serotype_1_2a_str_88-0478_1196176 | 0.9316 |
| Listeria_monocytogenes_serotype_1_2b_str_10-0810_1196163 | Listeria_monocytogenes_serotype_1_2a_str_88-0478_1196176 | 0.9316 |
| Listeria_monocytogenes_serotype_1_2a_str_99-6370_1196179 | Listeria_monocytogenes_serotype_1_2a_str_88-0478_1196176 | 0.9876 |
| Listeria_monocytogenes_serotype_1_2a_str_98-2035_1196178 | Listeria_monocytogenes_serotype_1_2a_str_88-0478_1196176 | 0.9876 |
| Listeria_monocytogenes_serotype_1_2a_str_95-0093_1196177 | Listeria_monocytogenes_serotype_1_2a_str_88-0478_1196176 | 0.9934 |
| Listeria_monocytogenes_serotype_1_2a_str_88-0478_1196176 | Listeria_monocytogenes_serotype_1_2a_str_88-0478_1196176 | 0.0668 |
| Listeria_welshimeri_1643                                 | Listeria_monocytogenes_serotype_1_2a_str_95-0093_1196177 | 0.8641 |
| Listeria_welshimeri_serovar_6b_str_SLCC5334_386043       | Listeria_monocytogenes_serotype_1_2a_str_95-0093_1196177 | 0.8638 |
| Listeria_seeligeri_serovar_1_2b_str_SLCC3954_683837      | Listeria_monocytogenes_serotype_1_2a_str_95-0093_1196177 | 0.8702 |
| Listeria_seeligeri_FSL_S4-171_702452                     | Listeria_monocytogenes_serotype_1_2a_str_95-0093_1196177 | 0.8105 |
| Listeria_seeligeri_FSL_N1-067_702453                     | Listeria_monocytogenes_serotype_1_2a_str_95-0093_1196177 | 0.8321 |
| Listeria_seeligeri_1640_v1                               | Listeria_monocytogenes_serotype_1_2a_str_95-0093_1196177 | 0.8676 |
| Listeria_seeligeri_1640                                  | Listeria_monocytogenes_serotype_1_2a_str_95-0093_1196177 | 0.865  |
| Listeria_monocytogenes_WSLC1042_1457188                  | Listeria_monocytogenes_serotype_1_2a_str_95-0093_1196177 | 0.9164 |
| Listeria_monocytogenes_WSLC1001_1457187                  | Listeria_monocytogenes_serotype_1_2a_str_95-0093_1196177 | 0.9517 |
| Listeria_monocytogenes_SLCC7179_879090                   | Listeria_monocytogenes_serotype_1_2a_str_95-0093_1196177 | 0.9482 |
| Listeria_monocytogenes_SLCC5850_882096                   | Listeria_monocytogenes_serotype_1_2a_str_95-0093_1196177 | 0.9515 |
| Listeria_monocytogenes_SLCC2755_932919                   | Listeria_monocytogenes_serotype_1_2a_str_95-0093_1196177 | 0.9174 |
| Listeria_monocytogenes_SLCC2540_879089                   | Listeria_monocytogenes_serotype_1_2a_str_95-0093_1196177 | 0.9345 |
| Listeria_monocytogenes_SLCC2479_882020                   | Listeria_monocytogenes_serotype_1_2a_str_95-0093_1196177 | 0.9516 |
| Listeria_monocytogenes_SLCC2378_879088                   | Listeria_monocytogenes_serotype_1_2a_str_95-0093_1196177 | 0.9174 |
| Listeria_monocytogenes_SLCC2376_882097                   | Listeria_monocytogenes_serotype_1_2a_str_95-0093_1196177 | 0.9216 |
| Listeria_monocytogenes_SLCC2372_932920                   | Listeria_monocytogenes_serotype_1_2a_str_95-0093_1196177 | 0.9439 |
| Listeria_monocytogenes_serotype_4b_str_LL195_1230340     | Listeria_monocytogenes_serotype_1_2a_str_95-0093_1196177 | 0.9225 |
| Listeria_monocytogenes_serotype_4b_str_LIS0087_1134669   | Listeria_monocytogenes_serotype_1_2a_str_95-0093_1196177 | 0.9337 |
| Listeria_monocytogenes_serotype_4b_str_F2365_265669      | Listeria_monocytogenes_serotype_1_2a_str_95-0093_1196177 | 0.9225 |
| Listeria_monocytogenes_serotype_4b_str_CLIP_80459_568819 | Listeria_monocytogenes_serotype_1_2a_str_95-0093_1196177 | 0.9292 |
| Listeria_monocytogenes_serotype_4b_str_81-0861_1196161   | Listeria_monocytogenes_serotype_1_2a_str_95-0093_1196177 | 0.9135 |
| Listeria_monocytogenes_serotype_4b_str_81-0592_1196160   | Listeria_monocytogenes_serotype_1_2a_str_95-0093_1196177 | 0.9145 |
| Listeria_monocytogenes_serotype_4b_str_81-0558_1196159   | Listeria_monocytogenes_serotype_1_2a_str_95-0093_1196177 | 0.9149 |
| Listeria_monocytogenes_serotype_4b_str_10-0809_1196162   | Listeria_monocytogenes_serotype_1_2a_str_95-0093_1196177 | 0.9145 |
| Listeria_monocytogenes_serotype_4b_str_02-6680_1196175   | Listeria_monocytogenes_serotype_1_2a_str_95-0093_1196177 | 0.9263 |
| Listeria_monocytogenes_serotype_4b_str_02-6679_1196174   | Listeria_monocytogenes_serotype_1_2a_str_95-0093_1196177 | 0.9263 |
| Listeria_monocytogenes_serotype_4b_str_02-1792_1196173   | Listeria_monocytogenes_serotype_1_2a_str_95-0093_1196177 | 0.916  |
| Listeria_monocytogenes_serotype_4b_str_02-1289_1196172   | Listeria_monocytogenes_serotype_1_2a_str_95-0093_1196177 | 0.916  |
| Listeria_monocytogenes_serotype_4b_str_02-1103_1196171   | Listeria_monocytogenes_serotype_1_2a_str_95-0093_1196177 | 0.916  |
| Listeria_monocytogenes_serotype_3c_str_10-5027_1196195   | Listeria_monocytogenes_serotype_1_2a_str_95-0093_1196177 | 0.9535 |
| Listeria_monocytogenes_serotype_1_2c_str_10-5026_1196194 | Listeria_monocytogenes_serotype_1_2a_str_95-0093_1196177 | 0.9542 |
| Listeria_monocytogenes_serotype_1_2c_str_10-5025_1196193 | Listeria_monocytogenes_serotype_1_2a_str_95-0093_1196177 | 0.9542 |
| Listeria_monocytogenes_serotype_1_2b_str_10-0811_1196164 | Listeria_monocytogenes_serotype_1_2a_str_95-0093_1196177 | 0.9342 |
| Listeria_monocytogenes_serotype_1_2b_str_10-0810_1196163 | Listeria_monocytogenes_serotype_1_2a_str_95-0093_1196177 | 0.9342 |
| Listeria_monocytogenes_serotype_1_2a_str_99-6370_1196179 | Listeria_monocytogenes_serotype_1_2a_str_95-0093_1196177 | 0.992  |
| Listeria_monocytogenes_serotype_1_2a_str_98-2035_1196178 | Listeria_monocytogenes_serotype_1_2a_str_95-0093_1196177 | 0.992  |
| Listeria_monocytogenes_serotype_1_2a_str_95-0093_1196177 | Listeria_monocytogenes_serotype_1_2a_str_95-0093_1196177 | 0.0664 |
| Listeria_welshimeri_1643                                 | Listeria_monocytogenes_serotype_1_2a_str_98-2035_1196178 | 0.8605 |
| Listeria_welshimeri_serovar_6b_str_SLCC5334_386043       | Listeria_monocytogenes_serotype_1_2a_str_98-2035_1196178 | 0.8601 |
| Listeria_seeligeri_serovar_1_2b_str_SLCC3954_683837      | Listeria_monocytogenes_serotype_1_2a_str_98-2035_1196178 | 0.8669 |
| Listeria_seeligeri_FSL_S4-171_702452                     | Listeria_monocytogenes_serotype_1_2a_str_98-2035_1196178 | 0.8064 |
| Listeria_seeligeri_FSL_N1-067_702453                     | Listeria_monocytogenes_serotype_1_2a_str_98-2035_1196178 | 0.8283 |
| Listeria_seeligeri_1640_v1                               | Listeria_monocytogenes_serotype_1_2a_str_98-2035_1196178 | 0.8625 |
| Listeria_seeligeri_1640                                  | Listeria_monocytogenes_serotype_1_2a_str_98-2035_1196178 | 0.8606 |
| Listeria_monocytogenes_WSLC1042_1457188                  | Listeria_monocytogenes_serotype_1_2a_str_98-2035_1196178 | 0.911  |
| Listeria_monocytogenes_WSLC1001_1457187                  | Listeria_monocytogenes_serotype_1_2a_str_98-2035_1196178 | 0.9468 |
| Listeria_monocytogenes_SLCC7179_879090                   | Listeria_monocytogenes_serotype_1_2a_str_98-2035_1196178 | 0.9422 |
| Listeria_monocytogenes_SLCC5850_882096                   | Listeria_monocytogenes_serotype_1_2a_str_98-2035_1196178 | 0.9469 |
| Listeria_monocytogenes_SLCC2755_932919                   | Listeria_monocytogenes_serotype_1_2a_str_98-2035_1196178 | 0.9128 |
| Listeria_monocytogenes_SLCC2540_879089                   | Listeria_monocytogenes_serotype_1_2a_str_98-2035_1196178 | 0.929  |
| Listeria_monocytogenes_SLCC2479_882020                   | Listeria_monocytogenes_serotype_1_2a_str_98-2035_1196178 | 0.9453 |



Listeria\_monocytogenes\_serotype\_1\_2c\_str\_10-5025\_1196193  
Listeria\_monocytogenes\_serotype\_1\_2b\_str\_10-0811\_1196164  
Listeria\_monocytogenes\_serotype\_1\_2b\_str\_10-0810\_1196163  
Listeria\_welshimeri\_1643  
Listeria\_welshimeri\_serovar\_6b\_str\_SLCC5334\_386043  
Listeria\_seeligeri\_serovar\_1\_2b\_str\_SLCC3954\_683837  
Listeria\_seeligeri\_FSL\_S4-171\_702452  
Listeria\_seeligeri\_FSL\_N1-067\_702453  
Listeria\_seeligeri\_1640\_v1  
Listeria\_seeligeri\_1640  
Listeria\_monocytogenes\_WSLC1042\_1457188  
Listeria\_monocytogenes\_WSLC1001\_1457187  
Listeria\_monocytogenes\_SLCC7179\_879090  
Listeria\_monocytogenes\_SLCC5850\_882096  
Listeria\_monocytogenes\_SLCC2755\_932919  
Listeria\_monocytogenes\_SLCC2540\_879089  
Listeria\_monocytogenes\_SLCC2479\_882020  
Listeria\_monocytogenes\_SLCC2378\_879088  
Listeria\_monocytogenes\_SLCC2376\_882097  
Listeria\_monocytogenes\_SLCC2372\_932920  
Listeria\_monocytogenes\_serotype\_4b\_str\_LL195\_1230340  
Listeria\_monocytogenes\_serotype\_4b\_str\_LIS0087\_1134669  
Listeria\_monocytogenes\_serotype\_4b\_str\_F2365\_265669  
Listeria\_monocytogenes\_serotype\_4b\_str\_CLIP\_80459\_568819  
Listeria\_monocytogenes\_serotype\_4b\_str\_81-0861\_1196161  
Listeria\_monocytogenes\_serotype\_4b\_str\_81-0592\_1196160  
Listeria\_monocytogenes\_serotype\_4b\_str\_81-0558\_1196159  
Listeria\_monocytogenes\_serotype\_4b\_str\_10-0809\_1196162  
Listeria\_monocytogenes\_serotype\_4b\_str\_02-6680\_1196175  
Listeria\_monocytogenes\_serotype\_4b\_str\_02-6679\_1196174  
Listeria\_monocytogenes\_serotype\_4b\_str\_02-1792\_1196173  
Listeria\_monocytogenes\_serotype\_4b\_str\_02-1289\_1196172  
Listeria\_monocytogenes\_serotype\_4b\_str\_02-1103\_1196171  
Listeria\_monocytogenes\_serotype\_3c\_str\_10-5027\_1196195  
Listeria\_monocytogenes\_serotype\_1\_2c\_str\_10-5026\_1196194  
Listeria\_monocytogenes\_serotype\_1\_2c\_str\_10-5025\_1196193  
Listeria\_monocytogenes\_serotype\_1\_2b\_str\_10-0811\_1196164  
Listeria\_welshimeri\_1643  
Listeria\_welshimeri\_serovar\_6b\_str\_SLCC5334\_386043  
Listeria\_seeligeri\_serovar\_1\_2b\_str\_SLCC3954\_683837  
Listeria\_seeligeri\_FSL\_S4-171\_702452  
Listeria\_seeligeri\_FSL\_N1-067\_702453  
Listeria\_seeligeri\_1640\_v1  
Listeria\_seeligeri\_1640  
Listeria\_monocytogenes\_WSLC1042\_1457188  
Listeria\_monocytogenes\_WSLC1001\_1457187  
Listeria\_monocytogenes\_SLCC7179\_879090  
Listeria\_monocytogenes\_SLCC5850\_882096  
Listeria\_monocytogenes\_SLCC2755\_932919  
Listeria\_monocytogenes\_SLCC2540\_879089  
Listeria\_monocytogenes\_SLCC2479\_882020  
Listeria\_monocytogenes\_SLCC2378\_879088  
Listeria\_monocytogenes\_SLCC2376\_882097  
Listeria\_monocytogenes\_SLCC2372\_932920  
Listeria\_monocytogenes\_serotype\_4b\_str\_LL195\_1230340  
Listeria\_monocytogenes\_serotype\_4b\_str\_LIS0087\_1134669  
Listeria\_monocytogenes\_serotype\_4b\_str\_F2365\_265669  
Listeria\_monocytogenes\_serotype\_4b\_str\_CLIP\_80459\_568819  
Listeria\_monocytogenes\_serotype\_4b\_str\_81-0861\_1196161  
Listeria\_monocytogenes\_serotype\_4b\_str\_81-0592\_1196160  
Listeria\_monocytogenes\_serotype\_4b\_str\_81-0558\_1196159  
Listeria\_monocytogenes\_serotype\_4b\_str\_10-0809\_1196162  
Listeria\_monocytogenes\_serotype\_4b\_str\_02-6680\_1196175  
Listeria\_monocytogenes\_serotype\_4b\_str\_02-6679\_1196174  
Listeria\_monocytogenes\_serotype\_4b\_str\_02-1792\_1196173  
Listeria\_monocytogenes\_serotype\_4b\_str\_02-1289\_1196172  
Listeria\_monocytogenes\_serotype\_4b\_str\_02-1103\_1196171  
Listeria\_monocytogenes\_serotype\_3c\_str\_10-5027\_1196195  
Listeria\_monocytogenes\_serotype\_1\_2c\_str\_10-5026\_1196194  
Listeria\_monocytogenes\_serotype\_1\_2c\_str\_10-5025\_1196193  
Listeria\_welshimeri\_1643  
Listeria\_welshimeri\_serovar\_6b\_str\_SLCC5334\_386043  
Listeria\_seeligeri\_serovar\_1\_2b\_str\_SLCC3954\_683837  
Listeria\_seeligeri\_FSL\_S4-171\_702452  
Listeria\_seeligeri\_FSL\_N1-067\_702453  
Listeria\_seeligeri\_1640\_v1  
Listeria\_seeligeri\_1640  
Listeria\_monocytogenes\_WSLC1042\_1457188  
Listeria\_monocytogenes\_WSLC1001\_1457187  
Listeria\_monocytogenes\_SLCC7179\_879090  
Listeria\_monocytogenes\_SLCC5850\_882096  
Listeria\_monocytogenes\_SLCC2755\_932919  
Listeria\_monocytogenes\_SLCC2540\_879089  
Listeria\_monocytogenes\_SLCC2479\_882020  
Listeria\_monocytogenes\_SLCC2378\_879088  
Listeria\_monocytogenes\_SLCC2376\_882097  
Listeria\_monocytogenes\_SLCC2372\_932920  
Listeria\_monocytogenes\_serotype\_4b\_str\_LL195\_1230340  
Listeria\_monocytogenes\_serotype\_4b\_str\_LIS0087\_1134669  
Listeria\_monocytogenes\_serotype\_4b\_str\_F2365\_265669  
Listeria\_monocytogenes\_serotype\_4b\_str\_CLIP\_80459\_568819

[illegible]

0.943  
1  
0.0719  
0.8694  
0.8691  
0.8744  
0.8154  
0.8298  
0.876  
0.8769  
0.9371  
0.9374  
0.9376  
0.939  
0.9309  
0.9564  
0.9385  
0.9382  
0.9272  
0.9313  
0.9442  
0.9282  
0.9442  
0.946  
0.9429  
0.944  
0.9447  
0.9444  
0.9416  
0.9416  
0.9455  
0.9455  
0.9455  
0.9422  
0.943  
0.943  
0.0719  
0.8699  
0.8693  
0.8754  
0.8184  
0.8419  
0.8789  
0.8704  
0.9256  
0.9554  
0.949  
0.9564  
0.9232  
0.9449  
0.9855  
0.927  
0.9322  
0.9775  
0.9314  
0.9351  
0.9314  
0.934  
0.9222  
0.9233  
0.924  
0.9233  
0.9308  
0.9308  
0.9247  
0.9247  
0.9247  
0.9981  
1  
0.0692  
0.8699  
0.8693  
0.8754  
0.8184  
0.8419  
0.8789  
0.8704  
0.9256  
0.9554  
0.949  
0.9564  
0.9232  
0.9449  
0.9855  
0.927  
0.9322  
0.9775  
0.9314  
0.9351  
0.9314  
0.934

Listeria\_monocytogenes\_serotype\_4b\_str\_81-0861\_1196161  
Listeria\_monocytogenes\_serotype\_4b\_str\_81-0592\_1196160  
Listeria\_monocytogenes\_serotype\_4b\_str\_81-0558\_1196159  
Listeria\_monocytogenes\_serotype\_4b\_str\_10-0809\_1196162  
Listeria\_monocytogenes\_serotype\_4b\_str\_02-6680\_1196175  
Listeria\_monocytogenes\_serotype\_4b\_str\_02-6679\_1196174  
Listeria\_monocytogenes\_serotype\_4b\_str\_02-1792\_1196173  
Listeria\_monocytogenes\_serotype\_4b\_str\_02-1289\_1196172  
Listeria\_monocytogenes\_serotype\_4b\_str\_02-1103\_1196171  
Listeria\_monocytogenes\_serotype\_3c\_str\_10-5027\_1196195  
Listeria\_monocytogenes\_serotype\_1\_2c\_str\_10-5026\_1196194  
Listeria\_welshimeri\_1643  
Listeria\_welshimeri\_serovar\_6b\_str\_SLCC5334\_386043  
Listeria\_seeligeri\_serovar\_1\_2b\_str\_SLCC3954\_683837  
Listeria\_seeligeri\_FSL\_S4-171\_702452  
Listeria\_seeligeri\_FSL\_N1-067\_702453  
Listeria\_seeligeri\_1640\_v1  
Listeria\_seeligeri\_1640  
Listeria\_monocytogenes\_WSLC1042\_1457188  
Listeria\_monocytogenes\_WSLC1001\_1457187  
Listeria\_monocytogenes\_SLCC7179\_879090  
Listeria\_monocytogenes\_SLCC5850\_882096  
Listeria\_monocytogenes\_SLCC2755\_932919  
Listeria\_monocytogenes\_SLCC2540\_879089  
Listeria\_monocytogenes\_SLCC2479\_882020  
Listeria\_monocytogenes\_SLCC2378\_879088  
Listeria\_monocytogenes\_SLCC2376\_882097  
Listeria\_monocytogenes\_SLCC2372\_932920  
Listeria\_monocytogenes\_serotype\_4b\_str\_LL195\_1230340  
Listeria\_monocytogenes\_serotype\_4b\_str\_LIS0087\_1134669  
Listeria\_monocytogenes\_serotype\_4b\_str\_F2365\_265669  
Listeria\_monocytogenes\_serotype\_4b\_str\_CLIP\_80459\_568819  
Listeria\_monocytogenes\_serotype\_4b\_str\_81-0861\_1196161  
Listeria\_monocytogenes\_serotype\_4b\_str\_81-0592\_1196160  
Listeria\_monocytogenes\_serotype\_4b\_str\_81-0558\_1196159  
Listeria\_monocytogenes\_serotype\_4b\_str\_10-0809\_1196162  
Listeria\_monocytogenes\_serotype\_4b\_str\_02-6680\_1196175  
Listeria\_monocytogenes\_serotype\_4b\_str\_02-6679\_1196174  
Listeria\_monocytogenes\_serotype\_4b\_str\_02-1792\_1196173  
Listeria\_monocytogenes\_serotype\_4b\_str\_02-1289\_1196172  
Listeria\_monocytogenes\_serotype\_4b\_str\_02-1103\_1196171  
Listeria\_monocytogenes\_serotype\_3c\_str\_10-5027\_1196195  
Listeria\_welshimeri\_1643  
Listeria\_welshimeri\_serovar\_6b\_str\_SLCC5334\_386043  
Listeria\_seeligeri\_serovar\_1\_2b\_str\_SLCC3954\_683837  
Listeria\_seeligeri\_FSL\_S4-171\_702452  
Listeria\_seeligeri\_FSL\_N1-067\_702453  
Listeria\_seeligeri\_1640\_v1  
Listeria\_seeligeri\_1640  
Listeria\_monocytogenes\_WSLC1042\_1457188  
Listeria\_monocytogenes\_WSLC1001\_1457187  
Listeria\_monocytogenes\_SLCC7179\_879090  
Listeria\_monocytogenes\_SLCC5850\_882096  
Listeria\_monocytogenes\_SLCC2755\_932919  
Listeria\_monocytogenes\_SLCC2540\_879089  
Listeria\_monocytogenes\_SLCC2479\_882020  
Listeria\_monocytogenes\_SLCC2378\_879088  
Listeria\_monocytogenes\_SLCC2376\_882097  
Listeria\_monocytogenes\_SLCC2372\_932920  
Listeria\_monocytogenes\_serotype\_4b\_str\_LL195\_1230340  
Listeria\_monocytogenes\_serotype\_4b\_str\_LIS0087\_1134669  
Listeria\_monocytogenes\_serotype\_4b\_str\_F2365\_265669  
Listeria\_monocytogenes\_serotype\_4b\_str\_CLIP\_80459\_568819  
Listeria\_monocytogenes\_serotype\_4b\_str\_81-0861\_1196161  
Listeria\_monocytogenes\_serotype\_4b\_str\_81-0592\_1196160  
Listeria\_monocytogenes\_serotype\_4b\_str\_81-0558\_1196159  
Listeria\_monocytogenes\_serotype\_4b\_str\_10-0809\_1196162  
Listeria\_monocytogenes\_serotype\_4b\_str\_02-6680\_1196175  
Listeria\_monocytogenes\_serotype\_4b\_str\_02-6679\_1196174  
Listeria\_monocytogenes\_serotype\_4b\_str\_02-1792\_1196173  
Listeria\_monocytogenes\_serotype\_4b\_str\_02-1289\_1196172  
Listeria\_monocytogenes\_serotype\_4b\_str\_02-1103\_1196171  
Listeria\_welshimeri\_1643  
Listeria\_welshimeri\_serovar\_6b\_str\_SLCC5334\_386043  
Listeria\_seeligeri\_serovar\_1\_2b\_str\_SLCC3954\_683837  
Listeria\_seeligeri\_FSL\_S4-171\_702452  
Listeria\_seeligeri\_FSL\_N1-067\_702453  
Listeria\_seeligeri\_1640\_v1  
Listeria\_seeligeri\_1640  
Listeria\_monocytogenes\_WSLC1042\_1457188  
Listeria\_monocytogenes\_WSLC1001\_1457187  
Listeria\_monocytogenes\_SLCC7179\_879090  
Listeria\_monocytogenes\_SLCC5850\_882096  
Listeria\_monocytogenes\_SLCC2755\_932919  
Listeria\_monocytogenes\_SLCC2540\_879089  
Listeria\_monocytogenes\_SLCC2479\_882020  
Listeria\_monocytogenes\_SLCC2378\_879088  
Listeria\_monocytogenes\_SLCC2376\_882097  
Listeria\_monocytogenes\_SLCC2372\_932920  
Listeria\_monocytogenes\_serotype\_4b\_str\_LL195\_1230340  
Listeria\_monocytogenes\_serotype\_4b\_str\_LIS0087\_1134669

[illegible]

0.9222  
0.9233  
0.924  
0.9233  
0.9308  
0.9308  
0.9247  
0.9247  
0.9247  
0.9981  
0.0692  
0.8688  
0.8685  
0.8746  
0.8169  
0.8407  
0.8777  
0.8696  
0.9248  
0.9547  
0.9475  
0.9556  
0.922  
0.9438  
0.9844  
0.9259  
0.9314  
0.9768  
0.9303  
0.9343  
0.9303  
0.9329  
0.9211  
0.9221  
0.9225  
0.9221  
0.93  
0.93  
0.924  
0.924  
0.924  
0.0707  
0.8818  
0.8812  
0.8744  
0.8228  
0.8257  
0.8847  
0.8833  
0.9849  
0.9197  
0.9372  
0.9231  
0.9361  
0.9433  
0.924  
0.9864  
0.9302  
0.9169  
0.9825  
0.9095  
0.9825  
0.9628  
0.9911  
0.9922  
0.9918  
0.9925  
0.9629  
0.9629  
1  
1  
0.0672  
0.8818  
0.8812  
0.8744  
0.8228  
0.8257  
0.8847  
0.8833  
0.9849  
0.9197  
0.9372  
0.9231  
0.9361  
0.9433  
0.924  
0.9864  
0.9302  
0.9169  
0.9825  
0.9095



|                                                          |                                                        |        |
|----------------------------------------------------------|--------------------------------------------------------|--------|
| Listeria_monocytogenes_serotype_4b_str_F2365_265669      | Listeria_monocytogenes_serotype_4b_str_02-1289_1196172 | 0.9825 |
| Listeria_monocytogenes_serotype_4b_str_CLIP_80459_568819 | Listeria_monocytogenes_serotype_4b_str_02-1289_1196172 | 0.9628 |
| Listeria_monocytogenes_serotype_4b_str_81-0861_1196161   | Listeria_monocytogenes_serotype_4b_str_02-1289_1196172 | 0.9911 |
| Listeria_monocytogenes_serotype_4b_str_81-0592_1196160   | Listeria_monocytogenes_serotype_4b_str_02-1289_1196172 | 0.9922 |
| Listeria_monocytogenes_serotype_4b_str_81-0558_1196159   | Listeria_monocytogenes_serotype_4b_str_02-1289_1196172 | 0.9918 |
| Listeria_monocytogenes_serotype_4b_str_10-0809_1196162   | Listeria_monocytogenes_serotype_4b_str_02-1289_1196172 | 0.9925 |
| Listeria_monocytogenes_serotype_4b_str_02-6680_1196175   | Listeria_monocytogenes_serotype_4b_str_02-1289_1196172 | 0.9629 |
| Listeria_monocytogenes_serotype_4b_str_02-6679_1196174   | Listeria_monocytogenes_serotype_4b_str_02-1289_1196172 | 0.9629 |
| Listeria_monocytogenes_serotype_4b_str_02-1792_1196173   | Listeria_monocytogenes_serotype_4b_str_02-1289_1196172 | 1      |
| Listeria_monocytogenes_serotype_4b_str_02-1289_1196172   | Listeria_monocytogenes_serotype_4b_str_02-1289_1196172 | 0.0672 |
| Listeria_welshimeri_1643                                 | Listeria_monocytogenes_serotype_4b_str_02-1792_1196173 | 0.8818 |
| Listeria_welshimeri_serovar_6b_str_SLCC5334_386043       | Listeria_monocytogenes_serotype_4b_str_02-1792_1196173 | 0.8812 |
| Listeria_seeligeri_serovar_1_2b_str_SLCC3954_683837      | Listeria_monocytogenes_serotype_4b_str_02-1792_1196173 | 0.8744 |
| Listeria_seeligeri_FSL_S4-171_702452                     | Listeria_monocytogenes_serotype_4b_str_02-1792_1196173 | 0.8228 |
| Listeria_seeligeri_FSL_N1-067_702453                     | Listeria_monocytogenes_serotype_4b_str_02-1792_1196173 | 0.8257 |
| Listeria_seeligeri_1640_v1                               | Listeria_monocytogenes_serotype_4b_str_02-1792_1196173 | 0.8847 |
| Listeria_seeligeri_1640                                  | Listeria_monocytogenes_serotype_4b_str_02-1792_1196173 | 0.8833 |
| Listeria_monocytogenes_WSLC1042_1457188                  | Listeria_monocytogenes_serotype_4b_str_02-1792_1196173 | 0.9849 |
| Listeria_monocytogenes_WSLC1001_1457187                  | Listeria_monocytogenes_serotype_4b_str_02-1792_1196173 | 0.9197 |
| Listeria_monocytogenes_SLCC7179_879090                   | Listeria_monocytogenes_serotype_4b_str_02-1792_1196173 | 0.9372 |
| Listeria_monocytogenes_SLCC5850_882096                   | Listeria_monocytogenes_serotype_4b_str_02-1792_1196173 | 0.9231 |
| Listeria_monocytogenes_SLCC2755_932919                   | Listeria_monocytogenes_serotype_4b_str_02-1792_1196173 | 0.9361 |
| Listeria_monocytogenes_SLCC2540_879089                   | Listeria_monocytogenes_serotype_4b_str_02-1792_1196173 | 0.9433 |
| Listeria_monocytogenes_SLCC2479_882020                   | Listeria_monocytogenes_serotype_4b_str_02-1792_1196173 | 0.924  |
| Listeria_monocytogenes_SLCC2378_879088                   | Listeria_monocytogenes_serotype_4b_str_02-1792_1196173 | 0.9864 |
| Listeria_monocytogenes_SLCC2376_882097                   | Listeria_monocytogenes_serotype_4b_str_02-1792_1196173 | 0.9302 |
| Listeria_monocytogenes_SLCC2372_932920                   | Listeria_monocytogenes_serotype_4b_str_02-1792_1196173 | 0.9169 |
| Listeria_monocytogenes_serotype_4b_str_LL195_1230340     | Listeria_monocytogenes_serotype_4b_str_02-1792_1196173 | 0.9825 |
| Listeria_monocytogenes_serotype_4b_str_LIS0087_1134669   | Listeria_monocytogenes_serotype_4b_str_02-1792_1196173 | 0.9095 |
| Listeria_monocytogenes_serotype_4b_str_F2365_265669      | Listeria_monocytogenes_serotype_4b_str_02-1792_1196173 | 0.9825 |
| Listeria_monocytogenes_serotype_4b_str_CLIP_80459_568819 | Listeria_monocytogenes_serotype_4b_str_02-1792_1196173 | 0.9628 |
| Listeria_monocytogenes_serotype_4b_str_81-0861_1196161   | Listeria_monocytogenes_serotype_4b_str_02-1792_1196173 | 0.9911 |
| Listeria_monocytogenes_serotype_4b_str_81-0592_1196160   | Listeria_monocytogenes_serotype_4b_str_02-1792_1196173 | 0.9922 |
| Listeria_monocytogenes_serotype_4b_str_81-0558_1196159   | Listeria_monocytogenes_serotype_4b_str_02-1792_1196173 | 0.9918 |
| Listeria_monocytogenes_serotype_4b_str_10-0809_1196162   | Listeria_monocytogenes_serotype_4b_str_02-1792_1196173 | 0.9925 |
| Listeria_monocytogenes_serotype_4b_str_02-6680_1196175   | Listeria_monocytogenes_serotype_4b_str_02-1792_1196173 | 0.9629 |
| Listeria_monocytogenes_serotype_4b_str_02-6679_1196174   | Listeria_monocytogenes_serotype_4b_str_02-1792_1196173 | 0.9629 |
| Listeria_monocytogenes_serotype_4b_str_02-1792_1196173   | Listeria_monocytogenes_serotype_4b_str_02-1792_1196173 | 0.0672 |
| Listeria_welshimeri_1643                                 | Listeria_monocytogenes_serotype_4b_str_02-6679_1196174 | 0.8888 |
| Listeria_welshimeri_serovar_6b_str_SLCC5334_386043       | Listeria_monocytogenes_serotype_4b_str_02-6679_1196174 | 0.8885 |
| Listeria_seeligeri_serovar_1_2b_str_SLCC3954_683837      | Listeria_monocytogenes_serotype_4b_str_02-6679_1196174 | 0.8923 |
| Listeria_seeligeri_FSL_S4-171_702452                     | Listeria_monocytogenes_serotype_4b_str_02-6679_1196174 | 0.8329 |
| Listeria_seeligeri_FSL_N1-067_702453                     | Listeria_monocytogenes_serotype_4b_str_02-6679_1196174 | 0.8333 |
| Listeria_seeligeri_1640_v1                               | Listeria_monocytogenes_serotype_4b_str_02-6679_1196174 | 0.8972 |
| Listeria_seeligeri_1640                                  | Listeria_monocytogenes_serotype_4b_str_02-6679_1196174 | 0.886  |
| Listeria_monocytogenes_WSLC1042_1457188                  | Listeria_monocytogenes_serotype_4b_str_02-6679_1196174 | 0.9721 |
| Listeria_monocytogenes_WSLC1001_1457187                  | Listeria_monocytogenes_serotype_4b_str_02-6679_1196174 | 0.9368 |
| Listeria_monocytogenes_SLCC7179_879090                   | Listeria_monocytogenes_serotype_4b_str_02-6679_1196174 | 0.9431 |
| Listeria_monocytogenes_SLCC5850_882096                   | Listeria_monocytogenes_serotype_4b_str_02-6679_1196174 | 0.9414 |
| Listeria_monocytogenes_SLCC2755_932919                   | Listeria_monocytogenes_serotype_4b_str_02-6679_1196174 | 0.9514 |
| Listeria_monocytogenes_SLCC2540_879089                   | Listeria_monocytogenes_serotype_4b_str_02-6679_1196174 | 0.9501 |
| Listeria_monocytogenes_SLCC2479_882020                   | Listeria_monocytogenes_serotype_4b_str_02-6679_1196174 | 0.9308 |
| Listeria_monocytogenes_SLCC2378_879088                   | Listeria_monocytogenes_serotype_4b_str_02-6679_1196174 | 0.9728 |
| Listeria_monocytogenes_SLCC2376_882097                   | Listeria_monocytogenes_serotype_4b_str_02-6679_1196174 | 0.9442 |
| Listeria_monocytogenes_SLCC2372_932920                   | Listeria_monocytogenes_serotype_4b_str_02-6679_1196174 | 0.9234 |
| Listeria_monocytogenes_serotype_4b_str_LL195_1230340     | Listeria_monocytogenes_serotype_4b_str_02-6679_1196174 | 0.9792 |
| Listeria_monocytogenes_serotype_4b_str_LIS0087_1134669   | Listeria_monocytogenes_serotype_4b_str_02-6679_1196174 | 0.9173 |
| Listeria_monocytogenes_serotype_4b_str_F2365_265669      | Listeria_monocytogenes_serotype_4b_str_02-6679_1196174 | 0.9792 |
| Listeria_monocytogenes_serotype_4b_str_CLIP_80459_568819 | Listeria_monocytogenes_serotype_4b_str_02-6679_1196174 | 0.9811 |
| Listeria_monocytogenes_serotype_4b_str_81-0861_1196161   | Listeria_monocytogenes_serotype_4b_str_02-6679_1196174 | 0.9614 |
| Listeria_monocytogenes_serotype_4b_str_81-0592_1196160   | Listeria_monocytogenes_serotype_4b_str_02-6679_1196174 | 0.9625 |
| Listeria_monocytogenes_serotype_4b_str_81-0558_1196159   | Listeria_monocytogenes_serotype_4b_str_02-6679_1196174 | 0.9632 |
| Listeria_monocytogenes_serotype_4b_str_10-0809_1196162   | Listeria_monocytogenes_serotype_4b_str_02-6679_1196174 | 0.9629 |
| Listeria_monocytogenes_serotype_4b_str_02-6680_1196175   | Listeria_monocytogenes_serotype_4b_str_02-6679_1196174 | 1      |
| Listeria_monocytogenes_serotype_4b_str_02-6679_1196174   | Listeria_monocytogenes_serotype_4b_str_02-6679_1196174 | 0.0651 |
| Listeria_welshimeri_1643                                 | Listeria_monocytogenes_serotype_4b_str_02-6680_1196175 | 0.8888 |
| Listeria_welshimeri_serovar_6b_str_SLCC5334_386043       | Listeria_monocytogenes_serotype_4b_str_02-6680_1196175 | 0.8885 |
| Listeria_seeligeri_serovar_1_2b_str_SLCC3954_683837      | Listeria_monocytogenes_serotype_4b_str_02-6680_1196175 | 0.8923 |
| Listeria_seeligeri_FSL_S4-171_702452                     | Listeria_monocytogenes_serotype_4b_str_02-6680_1196175 | 0.8329 |
| Listeria_seeligeri_FSL_N1-067_702453                     | Listeria_monocytogenes_serotype_4b_str_02-6680_1196175 | 0.8333 |
| Listeria_seeligeri_1640_v1                               | Listeria_monocytogenes_serotype_4b_str_02-6680_1196175 | 0.8972 |
| Listeria_seeligeri_1640                                  | Listeria_monocytogenes_serotype_4b_str_02-6680_1196175 | 0.886  |
| Listeria_monocytogenes_WSLC1042_1457188                  | Listeria_monocytogenes_serotype_4b_str_02-6680_1196175 | 0.9721 |
| Listeria_monocytogenes_WSLC1001_1457187                  | Listeria_monocytogenes_serotype_4b_str_02-6680_1196175 | 0.9368 |
| Listeria_monocytogenes_SLCC7179_879090                   | Listeria_monocytogenes_serotype_4b_str_02-6680_1196175 | 0.9431 |
| Listeria_monocytogenes_SLCC5850_882096                   | Listeria_monocytogenes_serotype_4b_str_02-6680_1196175 | 0.9414 |
| Listeria_monocytogenes_SLCC2755_932919                   | Listeria_monocytogenes_serotype_4b_str_02-6680_1196175 | 0.9514 |
| Listeria_monocytogenes_SLCC2540_879089                   | Listeria_monocytogenes_serotype_4b_str_02-6680_1196175 | 0.9501 |
| Listeria_monocytogenes_SLCC2479_882020                   | Listeria_monocytogenes_serotype_4b_str_02-6680_1196175 | 0.9308 |
| Listeria_monocytogenes_SLCC2378_879088                   | Listeria_monocytogenes_serotype_4b_str_02-6680_1196175 | 0.9728 |
| Listeria_monocytogenes_SLCC2376_882097                   | Listeria_monocytogenes_serotype_4b_str_02-6680_1196175 | 0.9442 |
| Listeria_monocytogenes_SLCC2372_932920                   | Listeria_monocytogenes_serotype_4b_str_02-6680_1196175 | 0.9234 |
| Listeria_monocytogenes_serotype_4b_str_LL195_1230340     | Listeria_monocytogenes_serotype_4b_str_02-6680_1196175 | 0.9792 |
| Listeria_monocytogenes_serotype_4b_str_LIS0087_1134669   | Listeria_monocytogenes_serotype_4b_str_02-6680_1196175 | 0.9173 |
| Listeria_monocytogenes_serotype_4b_str_F2365_265669      | Listeria_monocytogenes_serotype_4b_str_02-6680_1196175 | 0.9792 |
| Listeria_monocytogenes_serotype_4b_str_CLIP_80459_568819 | Listeria_monocytogenes_serotype_4b_str_02-6680_1196175 | 0.9811 |
| Listeria_monocytogenes_serotype_4b_str_81-0861_1196161   | Listeria_monocytogenes_serotype_4b_str_02-6680_1196175 | 0.9614 |
| Listeria_monocytogenes_serotype_4b_str_81-0592_1196160   | Listeria_monocytogenes_serotype_4b_str_02-6680_1196175 | 0.9625 |
| Listeria_monocytogenes_serotype_4b_str_81-0558_1196159   | Listeria_monocytogenes_serotype_4b_str_02-6680_1196175 | 0.9632 |
| Listeria_monocytogenes_serotype_4b_str_10-0809_1196162   | Listeria_monocytogenes_serotype_4b_str_02-6680_1196175 | 0.9629 |
| Listeria_monocytogenes_serotype_4b_str_02-6680_1196175   | Listeria_monocytogenes_serotype_4b_str_02-6680_1196175 | 0.0651 |

Listeria\_welshimeri\_1643  
 Listeria\_welshimeri\_serovar\_6b\_str\_SLCC5334\_386043  
 Listeria\_seeligeri\_serovar\_1\_2b\_str\_SLCC3954\_683837  
 Listeria\_seeligeri\_FSL\_S4-171\_702452  
 Listeria\_seeligeri\_FSL\_N1-067\_702453  
 Listeria\_seeligeri\_1640\_v1  
 Listeria\_seeligeri\_1640  
 Listeria\_monocytogenes\_WSLC1042\_1457188  
 Listeria\_monocytogenes\_WSLC1001\_1457187  
 Listeria\_monocytogenes\_SLCC7179\_879090  
 Listeria\_monocytogenes\_SLCC5850\_882096  
 Listeria\_monocytogenes\_SLCC2755\_932919  
 Listeria\_monocytogenes\_SLCC2540\_879089  
 Listeria\_monocytogenes\_SLCC2479\_882020  
 Listeria\_monocytogenes\_SLCC2378\_879088  
 Listeria\_monocytogenes\_SLCC2376\_882097  
 Listeria\_monocytogenes\_SLCC2372\_932920  
 Listeria\_monocytogenes\_serotype\_4b\_str\_LL195\_1230340  
 Listeria\_monocytogenes\_serotype\_4b\_str\_LIS0087\_1134669  
 Listeria\_monocytogenes\_serotype\_4b\_str\_F2365\_265669  
 Listeria\_monocytogenes\_serotype\_4b\_str\_CLIP\_80459\_568819  
 Listeria\_monocytogenes\_serotype\_4b\_str\_81-0861\_1196161  
 Listeria\_monocytogenes\_serotype\_4b\_str\_81-0592\_1196160  
 Listeria\_monocytogenes\_serotype\_4b\_str\_81-0558\_1196159  
 Listeria\_monocytogenes\_serotype\_4b\_str\_10-0809\_1196162  
 Listeria\_welshimeri\_1643  
 Listeria\_welshimeri\_serovar\_6b\_str\_SLCC5334\_386043  
 Listeria\_seeligeri\_serovar\_1\_2b\_str\_SLCC3954\_683837  
 Listeria\_seeligeri\_FSL\_S4-171\_702452  
 Listeria\_seeligeri\_FSL\_N1-067\_702453  
 Listeria\_seeligeri\_1640\_v1  
 Listeria\_seeligeri\_1640  
 Listeria\_monocytogenes\_WSLC1042\_1457188  
 Listeria\_monocytogenes\_WSLC1001\_1457187  
 Listeria\_monocytogenes\_SLCC7179\_879090  
 Listeria\_monocytogenes\_SLCC5850\_882096  
 Listeria\_monocytogenes\_SLCC2755\_932919  
 Listeria\_monocytogenes\_SLCC2540\_879089  
 Listeria\_monocytogenes\_SLCC2479\_882020  
 Listeria\_monocytogenes\_SLCC2378\_879088  
 Listeria\_monocytogenes\_SLCC2376\_882097  
 Listeria\_monocytogenes\_SLCC2372\_932920  
 Listeria\_monocytogenes\_serotype\_4b\_str\_LL195\_1230340  
 Listeria\_monocytogenes\_serotype\_4b\_str\_LIS0087\_1134669  
 Listeria\_monocytogenes\_serotype\_4b\_str\_F2365\_265669  
 Listeria\_monocytogenes\_serotype\_4b\_str\_CLIP\_80459\_568819  
 Listeria\_monocytogenes\_serotype\_4b\_str\_81-0861\_1196161  
 Listeria\_monocytogenes\_serotype\_4b\_str\_81-0592\_1196160  
 Listeria\_monocytogenes\_serotype\_4b\_str\_81-0558\_1196159  
 Listeria\_welshimeri\_1643  
 Listeria\_welshimeri\_serovar\_6b\_str\_SLCC5334\_386043  
 Listeria\_seeligeri\_serovar\_1\_2b\_str\_SLCC3954\_683837  
 Listeria\_seeligeri\_FSL\_S4-171\_702452  
 Listeria\_seeligeri\_FSL\_N1-067\_702453  
 Listeria\_seeligeri\_1640\_v1  
 Listeria\_seeligeri\_1640  
 Listeria\_monocytogenes\_WSLC1042\_1457188  
 Listeria\_monocytogenes\_WSLC1001\_1457187  
 Listeria\_monocytogenes\_SLCC7179\_879090  
 Listeria\_monocytogenes\_SLCC5850\_882096  
 Listeria\_monocytogenes\_SLCC2755\_932919  
 Listeria\_monocytogenes\_SLCC2540\_879089  
 Listeria\_monocytogenes\_SLCC2479\_882020  
 Listeria\_monocytogenes\_SLCC2378\_879088  
 Listeria\_monocytogenes\_SLCC2376\_882097  
 Listeria\_monocytogenes\_SLCC2372\_932920  
 Listeria\_monocytogenes\_serotype\_4b\_str\_LL195\_1230340  
 Listeria\_monocytogenes\_serotype\_4b\_str\_LIS0087\_1134669

[illegible]



|                                                          |                                                          |        |
|----------------------------------------------------------|----------------------------------------------------------|--------|
| Listeria_monocytogenes_serotype_4b_str_F2365_265669      | Listeria_monocytogenes_serotype_4b_str_81-0861_1196161   | 0.9807 |
| Listeria_monocytogenes_serotype_4b_str_CLIP_80459_568819 | Listeria_monocytogenes_serotype_4b_str_81-0861_1196161   | 0.9609 |
| Listeria_monocytogenes_serotype_4b_str_81-0861_1196161   | Listeria_monocytogenes_serotype_4b_str_81-0861_1196161   | 0.0652 |
| Listeria_welshimeri_1643                                 | Listeria_monocytogenes_serotype_4b_str_CLIP_80459_568819 | 0.8863 |
| Listeria_welshimeri_serovar_6b_str_SLCC5334_386043       | Listeria_monocytogenes_serotype_4b_str_CLIP_80459_568819 | 0.8856 |
| Listeria_seeligeri_serovar_1_2b_str_SLCC3954_683837      | Listeria_monocytogenes_serotype_4b_str_CLIP_80459_568819 | 0.8905 |
| Listeria_seeligeri_FSL_S4-171_702452                     | Listeria_monocytogenes_serotype_4b_str_CLIP_80459_568819 | 0.8329 |
| Listeria_seeligeri_FSL_N1-067_702453                     | Listeria_monocytogenes_serotype_4b_str_CLIP_80459_568819 | 0.831  |
| Listeria_seeligeri_1640_v1                               | Listeria_monocytogenes_serotype_4b_str_CLIP_80459_568819 | 0.8966 |
| Listeria_seeligeri_1640                                  | Listeria_monocytogenes_serotype_4b_str_CLIP_80459_568819 | 0.8888 |
| Listeria_monocytogenes_WSLC1042_1457188                  | Listeria_monocytogenes_serotype_4b_str_CLIP_80459_568819 | 0.9716 |
| Listeria_monocytogenes_WSLC1001_1457187                  | Listeria_monocytogenes_serotype_4b_str_CLIP_80459_568819 | 0.9385 |
| Listeria_monocytogenes_SLCC7179_879090                   | Listeria_monocytogenes_serotype_4b_str_CLIP_80459_568819 | 0.9434 |
| Listeria_monocytogenes_SLCC5850_882096                   | Listeria_monocytogenes_serotype_4b_str_CLIP_80459_568819 | 0.9432 |
| Listeria_monocytogenes_SLCC2755_932919                   | Listeria_monocytogenes_serotype_4b_str_CLIP_80459_568819 | 0.9532 |
| Listeria_monocytogenes_SLCC2540_879089                   | Listeria_monocytogenes_serotype_4b_str_CLIP_80459_568819 | 0.953  |
| Listeria_monocytogenes_SLCC2479_882020                   | Listeria_monocytogenes_serotype_4b_str_CLIP_80459_568819 | 0.9337 |
| Listeria_monocytogenes_SLCC2378_879088                   | Listeria_monocytogenes_serotype_4b_str_CLIP_80459_568819 | 0.9727 |
| Listeria_monocytogenes_SLCC2376_882097                   | Listeria_monocytogenes_serotype_4b_str_CLIP_80459_568819 | 0.9508 |
| Listeria_monocytogenes_SLCC2372_932920                   | Listeria_monocytogenes_serotype_4b_str_CLIP_80459_568819 | 0.9263 |
| Listeria_monocytogenes_serotype_4b_str_LL195_1230340     | Listeria_monocytogenes_serotype_4b_str_CLIP_80459_568819 | 0.9791 |
| Listeria_monocytogenes_serotype_4b_str_LIS0087_1134669   | Listeria_monocytogenes_serotype_4b_str_CLIP_80459_568819 | 0.9187 |
| Listeria_monocytogenes_serotype_4b_str_F2365_265669      | Listeria_monocytogenes_serotype_4b_str_CLIP_80459_568819 | 0.9791 |
| Listeria_monocytogenes_serotype_4b_str_CLIP_80459_568819 | Listeria_monocytogenes_serotype_4b_str_CLIP_80459_568819 | 0.065  |
| Listeria_welshimeri_1643                                 | Listeria_monocytogenes_serotype_4b_str_F2365_265669      | 0.8872 |
| Listeria_welshimeri_serovar_6b_str_SLCC5334_386043       | Listeria_monocytogenes_serotype_4b_str_F2365_265669      | 0.8865 |
| Listeria_seeligeri_serovar_1_2b_str_SLCC3954_683837      | Listeria_monocytogenes_serotype_4b_str_F2365_265669      | 0.8883 |
| Listeria_seeligeri_FSL_S4-171_702452                     | Listeria_monocytogenes_serotype_4b_str_F2365_265669      | 0.8296 |
| Listeria_seeligeri_FSL_N1-067_702453                     | Listeria_monocytogenes_serotype_4b_str_F2365_265669      | 0.8312 |
| Listeria_seeligeri_1640_v1                               | Listeria_monocytogenes_serotype_4b_str_F2365_265669      | 0.8979 |
| Listeria_seeligeri_1640                                  | Listeria_monocytogenes_serotype_4b_str_F2365_265669      | 0.887  |
| Listeria_monocytogenes_WSLC1042_1457188                  | Listeria_monocytogenes_serotype_4b_str_F2365_265669      | 0.9912 |
| Listeria_monocytogenes_WSLC1001_1457187                  | Listeria_monocytogenes_serotype_4b_str_F2365_265669      | 0.9317 |
| Listeria_monocytogenes_SLCC7179_879090                   | Listeria_monocytogenes_serotype_4b_str_F2365_265669      | 0.9419 |
| Listeria_monocytogenes_SLCC5850_882096                   | Listeria_monocytogenes_serotype_4b_str_F2365_265669      | 0.9364 |
| Listeria_monocytogenes_SLCC2755_932919                   | Listeria_monocytogenes_serotype_4b_str_F2365_265669      | 0.9514 |
| Listeria_monocytogenes_SLCC2540_879089                   | Listeria_monocytogenes_serotype_4b_str_F2365_265669      | 0.9542 |
| Listeria_monocytogenes_SLCC2479_882020                   | Listeria_monocytogenes_serotype_4b_str_F2365_265669      | 0.9311 |
| Listeria_monocytogenes_SLCC2378_879088                   | Listeria_monocytogenes_serotype_4b_str_F2365_265669      | 0.9927 |
| Listeria_monocytogenes_SLCC2376_882097                   | Listeria_monocytogenes_serotype_4b_str_F2365_265669      | 0.9461 |
| Listeria_monocytogenes_SLCC2372_932920                   | Listeria_monocytogenes_serotype_4b_str_F2365_265669      | 0.9237 |
| Listeria_monocytogenes_serotype_4b_str_LL195_1230340     | Listeria_monocytogenes_serotype_4b_str_F2365_265669      | 0.9992 |
| Listeria_monocytogenes_serotype_4b_str_LIS0087_1134669   | Listeria_monocytogenes_serotype_4b_str_F2365_265669      | 0.9119 |
| Listeria_monocytogenes_serotype_4b_str_F2365_265669      | Listeria_monocytogenes_serotype_4b_str_F2365_265669      | 0.0648 |
| Listeria_welshimeri_1643                                 | Listeria_monocytogenes_serotype_4b_str_LIS0087_1134669   | 0.8533 |
| Listeria_welshimeri_serovar_6b_str_SLCC5334_386043       | Listeria_monocytogenes_serotype_4b_str_LIS0087_1134669   | 0.853  |
| Listeria_seeligeri_serovar_1_2b_str_SLCC3954_683837      | Listeria_monocytogenes_serotype_4b_str_LIS0087_1134669   | 0.8607 |
| Listeria_seeligeri_FSL_S4-171_702452                     | Listeria_monocytogenes_serotype_4b_str_LIS0087_1134669   | 0.7991 |
| Listeria_seeligeri_FSL_N1-067_702453                     | Listeria_monocytogenes_serotype_4b_str_LIS0087_1134669   | 0.8117 |
| Listeria_seeligeri_1640_v1                               | Listeria_monocytogenes_serotype_4b_str_LIS0087_1134669   | 0.8593 |
| Listeria_seeligeri_1640                                  | Listeria_monocytogenes_serotype_4b_str_LIS0087_1134669   | 0.8597 |
| Listeria_monocytogenes_WSLC1042_1457188                  | Listeria_monocytogenes_serotype_4b_str_LIS0087_1134669   | 0.9049 |
| Listeria_monocytogenes_WSLC1001_1457187                  | Listeria_monocytogenes_serotype_4b_str_LIS0087_1134669   | 0.9645 |
| Listeria_monocytogenes_SLCC7179_879090                   | Listeria_monocytogenes_serotype_4b_str_LIS0087_1134669   | 0.9445 |
| Listeria_monocytogenes_SLCC5850_882096                   | Listeria_monocytogenes_serotype_4b_str_LIS0087_1134669   | 0.9635 |
| Listeria_monocytogenes_SLCC2755_932919                   | Listeria_monocytogenes_serotype_4b_str_LIS0087_1134669   | 0.9106 |
| Listeria_monocytogenes_SLCC2540_879089                   | Listeria_monocytogenes_serotype_4b_str_LIS0087_1134669   | 0.9243 |
| Listeria_monocytogenes_SLCC2479_882020                   | Listeria_monocytogenes_serotype_4b_str_LIS0087_1134669   | 0.9385 |
| Listeria_monocytogenes_SLCC2378_879088                   | Listeria_monocytogenes_serotype_4b_str_LIS0087_1134669   | 0.9059 |
| Listeria_monocytogenes_SLCC2376_882097                   | Listeria_monocytogenes_serotype_4b_str_LIS0087_1134669   | 0.9183 |
| Listeria_monocytogenes_SLCC2372_932920                   | Listeria_monocytogenes_serotype_4b_str_LIS0087_1134669   | 0.9315 |
| Listeria_monocytogenes_serotype_4b_str_LL195_1230340     | Listeria_monocytogenes_serotype_4b_str_LIS0087_1134669   | 0.9119 |
| Listeria_monocytogenes_serotype_4b_str_LIS0087_1134669   | Listeria_monocytogenes_serotype_4b_str_LIS0087_1134669   | 0.0682 |
| Listeria_welshimeri_1643                                 | Listeria_monocytogenes_serotype_4b_str_LL195_1230340     | 0.8872 |
| Listeria_welshimeri_serovar_6b_str_SLCC5334_386043       | Listeria_monocytogenes_serotype_4b_str_LL195_1230340     | 0.8865 |
| Listeria_seeligeri_serovar_1_2b_str_SLCC3954_683837      | Listeria_monocytogenes_serotype_4b_str_LL195_1230340     | 0.8883 |
| Listeria_seeligeri_FSL_S4-171_702452                     | Listeria_monocytogenes_serotype_4b_str_LL195_1230340     | 0.8296 |
| Listeria_seeligeri_FSL_N1-067_702453                     | Listeria_monocytogenes_serotype_4b_str_LL195_1230340     | 0.8312 |
| Listeria_seeligeri_1640_v1                               | Listeria_monocytogenes_serotype_4b_str_LL195_1230340     | 0.8979 |
| Listeria_seeligeri_1640                                  | Listeria_monocytogenes_serotype_4b_str_LL195_1230340     | 0.887  |
| Listeria_monocytogenes_WSLC1042_1457188                  | Listeria_monocytogenes_serotype_4b_str_LL195_1230340     | 0.9912 |
| Listeria_monocytogenes_WSLC1001_1457187                  | Listeria_monocytogenes_serotype_4b_str_LL195_1230340     | 0.9317 |
| Listeria_monocytogenes_SLCC7179_879090                   | Listeria_monocytogenes_serotype_4b_str_LL195_1230340     | 0.9419 |
| Listeria_monocytogenes_SLCC5850_882096                   | Listeria_monocytogenes_serotype_4b_str_LL195_1230340     | 0.9364 |
| Listeria_monocytogenes_SLCC2755_932919                   | Listeria_monocytogenes_serotype_4b_str_LL195_1230340     | 0.9514 |
| Listeria_monocytogenes_SLCC2540_879089                   | Listeria_monocytogenes_serotype_4b_str_LL195_1230340     | 0.9542 |
| Listeria_monocytogenes_SLCC2479_882020                   | Listeria_monocytogenes_serotype_4b_str_LL195_1230340     | 0.9311 |
| Listeria_monocytogenes_SLCC2378_879088                   | Listeria_monocytogenes_serotype_4b_str_LL195_1230340     | 0.9927 |
| Listeria_monocytogenes_SLCC2376_882097                   | Listeria_monocytogenes_serotype_4b_str_LL195_1230340     | 0.9461 |
| Listeria_monocytogenes_SLCC2372_932920                   | Listeria_monocytogenes_serotype_4b_str_LL195_1230340     | 0.9237 |
| Listeria_monocytogenes_serotype_4b_str_LL195_1230340     | Listeria_monocytogenes_serotype_4b_str_LL195_1230340     | 0.0645 |
| Listeria_welshimeri_1643                                 | Listeria_monocytogenes_SLCC2372_932920                   | 0.862  |
| Listeria_welshimeri_serovar_6b_str_SLCC5334_386043       | Listeria_monocytogenes_SLCC2372_932920                   | 0.8617 |
| Listeria_seeligeri_serovar_1_2b_str_SLCC3954_683837      | Listeria_monocytogenes_SLCC2372_932920                   | 0.8692 |
| Listeria_seeligeri_FSL_S4-171_702452                     | Listeria_monocytogenes_SLCC2372_932920                   | 0.8123 |
| Listeria_seeligeri_FSL_N1-067_702453                     | Listeria_monocytogenes_SLCC2372_932920                   | 0.8334 |
| Listeria_seeligeri_1640_v1                               | Listeria_monocytogenes_SLCC2372_932920                   | 0.8738 |
| Listeria_seeligeri_1640                                  | Listeria_monocytogenes_SLCC2372_932920                   | 0.8651 |
| Listeria_monocytogenes_WSLC1042_1457188                  | Listeria_monocytogenes_SLCC2372_932920                   | 0.9183 |
| Listeria_monocytogenes_WSLC1001_1457187                  | Listeria_monocytogenes_SLCC2372_932920                   | 0.954  |
| Listeria_monocytogenes_SLCC7179_879090                   | Listeria_monocytogenes_SLCC2372_932920                   | 0.9422 |

|                                                     |                                        |        |
|-----------------------------------------------------|----------------------------------------|--------|
| Listeria_monocytogenes_SLCC5850_882096              | Listeria_monocytogenes_SLCC2372_932920 | 0.947  |
| Listeria_monocytogenes_SLCC2755_932919              | Listeria_monocytogenes_SLCC2372_932920 | 0.9308 |
| Listeria_monocytogenes_SLCC2540_879089              | Listeria_monocytogenes_SLCC2372_932920 | 0.9361 |
| Listeria_monocytogenes_SLCC2479_882020              | Listeria_monocytogenes_SLCC2372_932920 | 0.9908 |
| Listeria_monocytogenes_SLCC2378_879088              | Listeria_monocytogenes_SLCC2372_932920 | 0.9194 |
| Listeria_monocytogenes_SLCC2376_882097              | Listeria_monocytogenes_SLCC2372_932920 | 0.9248 |
| Listeria_monocytogenes_SLCC2372_932920              | Listeria_monocytogenes_SLCC2372_932920 | 0.071  |
| Listeria_welshimeri_1643                            | Listeria_monocytogenes_SLCC2376_882097 | 0.889  |
| Listeria_welshimeri_serovar_6b_str_SLCC5334_386043  | Listeria_monocytogenes_SLCC2376_882097 | 0.8887 |
| Listeria_seeligeri_serovar_1_2b_str_SLCC3954_683837 | Listeria_monocytogenes_SLCC2376_882097 | 0.8929 |
| Listeria_seeligeri_FSL_S4-171_702452                | Listeria_monocytogenes_SLCC2376_882097 | 0.8312 |
| Listeria_seeligeri_FSL_N1-067_702453                | Listeria_monocytogenes_SLCC2376_882097 | 0.8277 |
| Listeria_seeligeri_1640_v1                          | Listeria_monocytogenes_SLCC2376_882097 | 0.8892 |
| Listeria_seeligeri_1640                             | Listeria_monocytogenes_SLCC2376_882097 | 0.8865 |
| Listeria_monocytogenes_WSLC1042_1457188             | Listeria_monocytogenes_SLCC2376_882097 | 0.9392 |
| Listeria_monocytogenes_WSLC1001_1457187             | Listeria_monocytogenes_SLCC2376_882097 | 0.9383 |
| Listeria_monocytogenes_SLCC7179_879090              | Listeria_monocytogenes_SLCC2376_882097 | 0.9436 |
| Listeria_monocytogenes_SLCC5850_882096              | Listeria_monocytogenes_SLCC2376_882097 | 0.9427 |
| Listeria_monocytogenes_SLCC2755_932919              | Listeria_monocytogenes_SLCC2376_882097 | 0.9293 |
| Listeria_monocytogenes_SLCC2540_879089              | Listeria_monocytogenes_SLCC2376_882097 | 0.9363 |
| Listeria_monocytogenes_SLCC2479_882020              | Listeria_monocytogenes_SLCC2376_882097 | 0.9326 |
| Listeria_monocytogenes_SLCC2378_879088              | Listeria_monocytogenes_SLCC2376_882097 | 0.9403 |
| Listeria_monocytogenes_SLCC2376_882097              | Listeria_monocytogenes_SLCC2376_882097 | 0.064  |
| Listeria_welshimeri_1643                            | Listeria_monocytogenes_SLCC2378_879088 | 0.8883 |
| Listeria_welshimeri_serovar_6b_str_SLCC5334_386043  | Listeria_monocytogenes_SLCC2378_879088 | 0.8876 |
| Listeria_seeligeri_serovar_1_2b_str_SLCC3954_683837 | Listeria_monocytogenes_SLCC2378_879088 | 0.8828 |
| Listeria_seeligeri_FSL_S4-171_702452                | Listeria_monocytogenes_SLCC2378_879088 | 0.8248 |
| Listeria_seeligeri_FSL_N1-067_702453                | Listeria_monocytogenes_SLCC2378_879088 | 0.8285 |
| Listeria_seeligeri_1640_v1                          | Listeria_monocytogenes_SLCC2378_879088 | 0.8939 |
| Listeria_seeligeri_1640                             | Listeria_monocytogenes_SLCC2378_879088 | 0.8817 |
| Listeria_monocytogenes_WSLC1042_1457188             | Listeria_monocytogenes_SLCC2378_879088 | 0.9966 |
| Listeria_monocytogenes_WSLC1001_1457187             | Listeria_monocytogenes_SLCC2378_879088 | 0.9257 |
| Listeria_monocytogenes_SLCC7179_879090              | Listeria_monocytogenes_SLCC2378_879088 | 0.9361 |
| Listeria_monocytogenes_SLCC5850_882096              | Listeria_monocytogenes_SLCC2378_879088 | 0.9303 |
| Listeria_monocytogenes_SLCC2755_932919              | Listeria_monocytogenes_SLCC2378_879088 | 0.946  |
| Listeria_monocytogenes_SLCC2540_879089              | Listeria_monocytogenes_SLCC2378_879088 | 0.9503 |
| Listeria_monocytogenes_SLCC2479_882020              | Listeria_monocytogenes_SLCC2378_879088 | 0.9266 |
| Listeria_monocytogenes_SLCC2378_879088              | Listeria_monocytogenes_SLCC2378_879088 | 0.0648 |
| Listeria_welshimeri_1643                            | Listeria_monocytogenes_SLCC2479_882020 | 0.8685 |
| Listeria_welshimeri_serovar_6b_str_SLCC5334_386043  | Listeria_monocytogenes_SLCC2479_882020 | 0.8681 |
| Listeria_seeligeri_serovar_1_2b_str_SLCC3954_683837 | Listeria_monocytogenes_SLCC2479_882020 | 0.8754 |
| Listeria_seeligeri_FSL_S4-171_702452                | Listeria_monocytogenes_SLCC2479_882020 | 0.8173 |
| Listeria_seeligeri_FSL_N1-067_702453                | Listeria_monocytogenes_SLCC2479_882020 | 0.8381 |
| Listeria_seeligeri_1640_v1                          | Listeria_monocytogenes_SLCC2479_882020 | 0.8785 |
| Listeria_seeligeri_1640                             | Listeria_monocytogenes_SLCC2479_882020 | 0.8712 |
| Listeria_monocytogenes_WSLC1042_1457188             | Listeria_monocytogenes_SLCC2479_882020 | 0.9256 |
| Listeria_monocytogenes_WSLC1001_1457187             | Listeria_monocytogenes_SLCC2479_882020 | 0.9607 |
| Listeria_monocytogenes_SLCC7179_879090              | Listeria_monocytogenes_SLCC2479_882020 | 0.9498 |
| Listeria_monocytogenes_SLCC5850_882096              | Listeria_monocytogenes_SLCC2479_882020 | 0.9545 |
| Listeria_monocytogenes_SLCC2755_932919              | Listeria_monocytogenes_SLCC2479_882020 | 0.9228 |
| Listeria_monocytogenes_SLCC2540_879089              | Listeria_monocytogenes_SLCC2479_882020 | 0.9431 |
| Listeria_monocytogenes_SLCC2479_882020              | Listeria_monocytogenes_SLCC2479_882020 | 0.0691 |
| Listeria_welshimeri_1643                            | Listeria_monocytogenes_SLCC2540_879089 | 0.8793 |
| Listeria_welshimeri_serovar_6b_str_SLCC5334_386043  | Listeria_monocytogenes_SLCC2540_879089 | 0.8786 |
| Listeria_seeligeri_serovar_1_2b_str_SLCC3954_683837 | Listeria_monocytogenes_SLCC2540_879089 | 0.8811 |
| Listeria_seeligeri_FSL_S4-171_702452                | Listeria_monocytogenes_SLCC2540_879089 | 0.8202 |
| Listeria_seeligeri_FSL_N1-067_702453                | Listeria_monocytogenes_SLCC2540_879089 | 0.8347 |
| Listeria_seeligeri_1640_v1                          | Listeria_monocytogenes_SLCC2540_879089 | 0.886  |
| Listeria_seeligeri_1640                             | Listeria_monocytogenes_SLCC2540_879089 | 0.8762 |
| Listeria_monocytogenes_WSLC1042_1457188             | Listeria_monocytogenes_SLCC2540_879089 | 0.9489 |
| Listeria_monocytogenes_WSLC1001_1457187             | Listeria_monocytogenes_SLCC2540_879089 | 0.9461 |
| Listeria_monocytogenes_SLCC7179_879090              | Listeria_monocytogenes_SLCC2540_879089 | 0.9387 |
| Listeria_monocytogenes_SLCC5850_882096              | Listeria_monocytogenes_SLCC2540_879089 | 0.9473 |
| Listeria_monocytogenes_SLCC2755_932919              | Listeria_monocytogenes_SLCC2540_879089 | 0.9421 |
| Listeria_monocytogenes_SLCC2540_879089              | Listeria_monocytogenes_SLCC2540_879089 | 0.0653 |
| Listeria_welshimeri_1643                            | Listeria_monocytogenes_SLCC2755_932919 | 0.8672 |
| Listeria_welshimeri_serovar_6b_str_SLCC5334_386043  | Listeria_monocytogenes_SLCC2755_932919 | 0.8666 |
| Listeria_seeligeri_serovar_1_2b_str_SLCC3954_683837 | Listeria_monocytogenes_SLCC2755_932919 | 0.8831 |
| Listeria_seeligeri_FSL_S4-171_702452                | Listeria_monocytogenes_SLCC2755_932919 | 0.8163 |
| Listeria_seeligeri_FSL_N1-067_702453                | Listeria_monocytogenes_SLCC2755_932919 | 0.8301 |
| Listeria_seeligeri_1640_v1                          | Listeria_monocytogenes_SLCC2755_932919 | 0.8873 |
| Listeria_seeligeri_1640                             | Listeria_monocytogenes_SLCC2755_932919 | 0.8764 |
| Listeria_monocytogenes_WSLC1042_1457188             | Listeria_monocytogenes_SLCC2755_932919 | 0.9442 |
| Listeria_monocytogenes_WSLC1001_1457187             | Listeria_monocytogenes_SLCC2755_932919 | 0.9294 |
| Listeria_monocytogenes_SLCC7179_879090              | Listeria_monocytogenes_SLCC2755_932919 | 0.9333 |
| Listeria_monocytogenes_SLCC5850_882096              | Listeria_monocytogenes_SLCC2755_932919 | 0.934  |
| Listeria_monocytogenes_SLCC2755_932919              | Listeria_monocytogenes_SLCC2755_932919 | 0.0692 |
| Listeria_welshimeri_1643                            | Listeria_monocytogenes_SLCC5850_882096 | 0.8799 |
| Listeria_welshimeri_serovar_6b_str_SLCC5334_386043  | Listeria_monocytogenes_SLCC5850_882096 | 0.8793 |
| Listeria_seeligeri_serovar_1_2b_str_SLCC3954_683837 | Listeria_monocytogenes_SLCC5850_882096 | 0.8837 |
| Listeria_seeligeri_FSL_S4-171_702452                | Listeria_monocytogenes_SLCC5850_882096 | 0.8186 |
| Listeria_seeligeri_FSL_N1-067_702453                | Listeria_monocytogenes_SLCC5850_882096 | 0.8336 |
| Listeria_seeligeri_1640_v1                          | Listeria_monocytogenes_SLCC5850_882096 | 0.8813 |
| Listeria_seeligeri_1640                             | Listeria_monocytogenes_SLCC5850_882096 | 0.8765 |
| Listeria_monocytogenes_WSLC1042_1457188             | Listeria_monocytogenes_SLCC5850_882096 | 0.9289 |
| Listeria_monocytogenes_WSLC1001_1457187             | Listeria_monocytogenes_SLCC5850_882096 | 0.9928 |
| Listeria_monocytogenes_SLCC7179_879090              | Listeria_monocytogenes_SLCC5850_882096 | 0.9587 |
| Listeria_monocytogenes_SLCC5850_882096              | Listeria_monocytogenes_SLCC5850_882096 | 0.0681 |
| Listeria_welshimeri_1643                            | Listeria_monocytogenes_SLCC7179_879090 | 0.8755 |
| Listeria_welshimeri_serovar_6b_str_SLCC5334_386043  | Listeria_monocytogenes_SLCC7179_879090 | 0.8749 |
| Listeria_seeligeri_serovar_1_2b_str_SLCC3954_683837 | Listeria_monocytogenes_SLCC7179_879090 | 0.887  |

|                                                     |                                                     |        |
|-----------------------------------------------------|-----------------------------------------------------|--------|
| Listeria_seeligeri_FSL_S4-171_702452                | Listeria_monocytogenes_SLCC7179_879090              | 0.8225 |
| Listeria_seeligeri_FSL_N1-067_702453                | Listeria_monocytogenes_SLCC7179_879090              | 0.8317 |
| Listeria_seeligeri_1640_v1                          | Listeria_monocytogenes_SLCC7179_879090              | 0.8854 |
| Listeria_seeligeri_1640                             | Listeria_monocytogenes_SLCC7179_879090              | 0.8843 |
| Listeria_monocytogenes_WSLC1042_1457188             | Listeria_monocytogenes_SLCC7179_879090              | 0.9347 |
| Listeria_monocytogenes_WSLC1001_1457187             | Listeria_monocytogenes_SLCC7179_879090              | 0.9559 |
| Listeria_monocytogenes_SLCC7179_879090              | Listeria_monocytogenes_SLCC7179_879090              | 0.0645 |
| Listeria_welshimeri_1643                            | Listeria_monocytogenes_WSLC1001_1457187             | 0.8759 |
| Listeria_welshimeri_serovar_6b_str_SLCC5334_386043  | Listeria_monocytogenes_WSLC1001_1457187             | 0.8752 |
| Listeria_seeligeri_serovar_1_2b_str_SLCC3954_683837 | Listeria_monocytogenes_WSLC1001_1457187             | 0.8788 |
| Listeria_seeligeri_FSL_S4-171_702452                | Listeria_monocytogenes_WSLC1001_1457187             | 0.814  |
| Listeria_seeligeri_FSL_N1-067_702453                | Listeria_monocytogenes_WSLC1001_1457187             | 0.8302 |
| Listeria_seeligeri_1640_v1                          | Listeria_monocytogenes_WSLC1001_1457187             | 0.8769 |
| Listeria_seeligeri_1640                             | Listeria_monocytogenes_WSLC1001_1457187             | 0.8733 |
| Listeria_monocytogenes_WSLC1042_1457188             | Listeria_monocytogenes_WSLC1001_1457187             | 0.9243 |
| Listeria_monocytogenes_WSLC1001_1457187             | Listeria_monocytogenes_WSLC1001_1457187             | 0.0807 |
| Listeria_welshimeri_1643                            | Listeria_monocytogenes_WSLC1042_1457188             | 0.8869 |
| Listeria_welshimeri_serovar_6b_str_SLCC5334_386043  | Listeria_monocytogenes_WSLC1042_1457188             | 0.8866 |
| Listeria_seeligeri_serovar_1_2b_str_SLCC3954_683837 | Listeria_monocytogenes_WSLC1042_1457188             | 0.8818 |
| Listeria_seeligeri_FSL_S4-171_702452                | Listeria_monocytogenes_WSLC1042_1457188             | 0.8235 |
| Listeria_seeligeri_FSL_N1-067_702453                | Listeria_monocytogenes_WSLC1042_1457188             | 0.8276 |
| Listeria_seeligeri_1640_v1                          | Listeria_monocytogenes_WSLC1042_1457188             | 0.8929 |
| Listeria_seeligeri_1640                             | Listeria_monocytogenes_WSLC1042_1457188             | 0.8803 |
| Listeria_monocytogenes_WSLC1042_1457188             | Listeria_monocytogenes_WSLC1042_1457188             | 0.0661 |
| Listeria_welshimeri_1643                            | Listeria_seeligeri_1640                             | 0.8632 |
| Listeria_welshimeri_serovar_6b_str_SLCC5334_386043  | Listeria_seeligeri_1640                             | 0.8625 |
| Listeria_seeligeri_serovar_1_2b_str_SLCC3954_683837 | Listeria_seeligeri_1640                             | 0.9119 |
| Listeria_seeligeri_FSL_S4-171_702452                | Listeria_seeligeri_1640                             | 0.8546 |
| Listeria_seeligeri_FSL_N1-067_702453                | Listeria_seeligeri_1640                             | 0.8718 |
| Listeria_seeligeri_1640_v1                          | Listeria_seeligeri_1640                             | 0.9216 |
| Listeria_seeligeri_1640                             | Listeria_seeligeri_1640                             | 0.0562 |
| Listeria_welshimeri_1643                            | Listeria_seeligeri_1640_v1                          | 0.873  |
| Listeria_welshimeri_serovar_6b_str_SLCC5334_386043  | Listeria_seeligeri_1640_v1                          | 0.8726 |
| Listeria_seeligeri_serovar_1_2b_str_SLCC3954_683837 | Listeria_seeligeri_1640_v1                          | 0.9201 |
| Listeria_seeligeri_FSL_S4-171_702452                | Listeria_seeligeri_1640_v1                          | 0.8494 |
| Listeria_seeligeri_FSL_N1-067_702453                | Listeria_seeligeri_1640_v1                          | 0.87   |
| Listeria_seeligeri_1640_v1                          | Listeria_seeligeri_1640_v1                          | 0.069  |
| Listeria_welshimeri_1643                            | Listeria_seeligeri_FSL_N1-067_702453                | 0.8126 |
| Listeria_welshimeri_serovar_6b_str_SLCC5334_386043  | Listeria_seeligeri_FSL_N1-067_702453                | 0.8123 |
| Listeria_seeligeri_serovar_1_2b_str_SLCC3954_683837 | Listeria_seeligeri_FSL_N1-067_702453                | 0.8633 |
| Listeria_seeligeri_FSL_S4-171_702452                | Listeria_seeligeri_FSL_N1-067_702453                | 0.8393 |
| Listeria_seeligeri_FSL_N1-067_702453                | Listeria_seeligeri_FSL_N1-067_702453                | 0.0507 |
| Listeria_welshimeri_1643                            | Listeria_seeligeri_FSL_S4-171_702452                | 0.8155 |
| Listeria_welshimeri_serovar_6b_str_SLCC5334_386043  | Listeria_seeligeri_FSL_S4-171_702452                | 0.8152 |
| Listeria_seeligeri_serovar_1_2b_str_SLCC3954_683837 | Listeria_seeligeri_FSL_S4-171_702452                | 0.8439 |
| Listeria_seeligeri_FSL_S4-171_702452                | Listeria_seeligeri_FSL_S4-171_702452                | 0.0473 |
| Listeria_welshimeri_1643                            | Listeria_seeligeri_serovar_1_2b_str_SLCC3954_683837 | 0.8741 |
| Listeria_welshimeri_serovar_6b_str_SLCC5334_386043  | Listeria_seeligeri_serovar_1_2b_str_SLCC3954_683837 | 0.8737 |
| Listeria_seeligeri_serovar_1_2b_str_SLCC3954_683837 | Listeria_seeligeri_serovar_1_2b_str_SLCC3954_683837 | 0.0526 |
| Listeria_welshimeri_1643                            | Listeria_welshimeri_serovar_6b_str_SLCC5334_386043  | 0.9992 |
| Listeria_welshimeri_serovar_6b_str_SLCC5334_386043  | Listeria_welshimeri_serovar_6b_str_SLCC5334_386043  | 0.0607 |
| Listeria_welshimeri_1643                            | Listeria_welshimeri_1643                            | 0.0607 |
