# Supplementary material for: Comparative Genomics Reveal the Utilization Ability of Variable Carbohydrates as Key Genetic Features of Listeria Pathogens in Their Pathogenic Lifestyles
Source: MDPI journal article supplement (doi:10.3390/pathogens11121430), 2022-11-28
Supplement: s1 [file s1]

Table S7. Characteristics of plasmids of Listeria strains.

| Organism                                 | Species                | Accession number  | length(bp) | GC content(%) | Note of plasmidFinder     |
|------------------------------------------|------------------------|-------------------|------------|---------------|---------------------------|
| Listeria_grayi_DSM_20601_525367          | Listeria_grayi         | GL538355.1        | 68061      | 37.15%        | repA(pLGUG1)              |
| Listeria_innocua_1642_str1               | Listeria_innocua       | CP045744.1        | 57553      | 36.04%        | pLM330006(pLM33)          |
| Listeria_innocua_1642_str2               | Listeria_innocua       | CP071156.1        | 85554      | 34.64%        | M640p00130(J1776plasmid)  |
| Listeria_innocua_1642_str3               | Listeria_innocua       | CP071158.1        | 83202      | 34.77%        | M640p00130(J1776plasmid)  |
| Listeria_innocua_Clip11262_272626        | Listeria_innocua       | AL592102.1        | 81905      | 35.52%        | pli0070(pLI100)           |
| Listeria_monocytogenes_08-5578_653938    | Listeria_monocytogenes | CP001603.1        | 77054      | 36.59%        | repA(pLM5578)             |
| Listeria_monocytogenes_1639_str100       | Listeria_monocytogenes | CP013725.1        | 86616      | 36.98%        | repA(pLGUG1)              |
| Listeria_monocytogenes_1639_str101       | Listeria_monocytogenes | CP064844.1        | 86630      | 36.98%        | repA(pLGUG1)              |
| Listeria_monocytogenes_1639_str111       | Listeria_monocytogenes | CP062125.1        | 50101      | 35.48%        | pLM330006(pLM33)          |
| Listeria_monocytogenes_1639_str11        | Listeria_monocytogenes | CP028184.1        | 62214      | 36.53%        | repA(pLM5578)             |
| Listeria_monocytogenes_1639_str12        | Listeria_monocytogenes | CP023753.1        | 58523      | 36.65%        | pLM330006(pLM33)          |
| Listeria_monocytogenes_1639_str130       | Listeria_monocytogenes | CP045973.1        | 57553      | 36.04%        | pLM330006(pLM33)          |
| Listeria_monocytogenes_1639_str132       | Listeria_monocytogenes | CP076670.1        | 53953      | 31.96%        | pLMUKDL7                  |
| Listeria_monocytogenes_1639_str13        | Listeria_monocytogenes | CP045750.1        | 51115      | 35.98%        | pLM330006(pLM33)          |
| Listeria_monocytogenes_1639_str147       | Listeria_monocytogenes | CP060527.1        | 90421      | 37.57%        | M643p00680(N1011Aplasmid) |
| Listeria_monocytogenes_1639_str14        | Listeria_monocytogenes | CP014254.1        | 52687      | 35.05%        | repA(pLGUG1)              |
| Listeria_monocytogenes_1639_str156       | Listeria_monocytogenes | CP041212.1        | 81588      | 37.57%        | M643p00680(N1011Aplasmid) |
| Listeria_monocytogenes_1639_str15        | Listeria_monocytogenes | CP011399.1        | 68224      | 35.67%        | pLM330006(pLM33)          |
| Listeria_monocytogenes_1639_str163       | Listeria_monocytogenes | CP030102.1        | 35885      | 34.84%        | pLM330006(pLM33)          |
| Listeria_monocytogenes_1639_str16        | Listeria_monocytogenes | CP019168.1        | 77105      | 36.59%        | repA(pLM5578)             |
| Listeria_monocytogenes_1639_str171       | Listeria_monocytogenes | CP015985.1        | 57530      | 36.04%        | pLM330006(pLM33)          |
| Listeria_monocytogenes_1639_str192       | Listeria_monocytogenes | CP090058.1        | 76010      | 34.09%        | pLMIV                     |
| Listeria_monocytogenes_1639_str19        | Listeria_monocytogenes | CP006595.1        | 57557      | 36.03%        | pLM330006(pLM33)          |
| Listeria_monocytogenes_1639_str20        | Listeria_monocytogenes | CP041214.1        | 57553      | 36.04%        | pLM330006(pLM33)          |
| Listeria_monocytogenes_1639_str25        | Listeria_monocytogenes | CP025260.1        | 63182      | 36.15%        | pLM330006(pLM33)          |
| Listeria_monocytogenes_1639_str26        | Listeria_monocytogenes | CP025441.1        | 63182      | 36.15%        | pLM330006(pLM33)          |
| Listeria_monocytogenes_1639_str27        | Listeria_monocytogenes | CP025439.1        | 63151      | 36.15%        | pLM330006(pLM33)          |
| Listeria_monocytogenes_1639_str29        | Listeria_monocytogenes | CP025569.1        | 58517      | 36.65%        | pLM330006(pLM33)          |
| Listeria_monocytogenes_1639_str2         | Listeria_monocytogenes | CP006611.1        | 148959     | 37.05%        | pLM330006(pLM33)          |
| Listeria_monocytogenes_1639_str36        | Listeria_monocytogenes | CP025561.1        | 57553      | 36.03%        | pLM330006(pLM33)          |
| Listeria_monocytogenes_1639_str3         | Listeria_monocytogenes | CP023051.1        | 61922      | 36.10%        | pLM330006(pLM33)          |
| Listeria_monocytogenes_1639_str40        | Listeria_monocytogenes | CP025444.1        | 25550      | 36.53%        | pLM330006(pLM33)          |
| Listeria_monocytogenes_1639_str45        | Listeria_monocytogenes | CP019166.1        | 77105      | 36.59%        | repA(pLM5578)             |
| Listeria_monocytogenes_1639_str46        | Listeria_monocytogenes | CP045971.1        | 2776       | 36.82%        | pLMIV                     |
| Listeria_monocytogenes_1639_str4         | Listeria_monocytogenes | CP023053.1        | 61919      | 36.10%        | pLM330006(pLM33)          |
| Listeria_monocytogenes_1639_str51        | Listeria_monocytogenes | CP025564.1        | 16073      | 35.16%        | pLM330006(pLM33)          |
| Listeria_monocytogenes_1639_str55        | Listeria_monocytogenes | CP053629.1        | 55801      | 34.92%        | M640p00130(J1776plasmid)  |
| Listeria_monocytogenes_1639_str57        | Listeria_monocytogenes | CP063384.1        | 4265       | 36.76%        | pLIS3                     |
| Listeria_monocytogenes_1639_str5         | Listeria_monocytogenes | CP022021.1        | 152337     | 36.98%        | pLM330006(pLM33)          |
| Listeria_monocytogenes_1639_str63        | Listeria_monocytogenes | CP014251.1        | 55521      | 36.70%        | pLM330006(pLM33)          |
| Listeria_monocytogenes_1639_str66        | Listeria_monocytogenes | CP038643.1        | 4392       | 37.41%        | pLIS3                     |
| Listeria_monocytogenes_1639_str70        | Listeria_monocytogenes | CP025566.1        | 15792      | 36.26%        | pLM330006(pLM33)          |
| Listeria_monocytogenes_1639_str71        | Listeria_monocytogenes | CP020834.1        | 81588      | 37.57%        | M643p00680(N1011Aplasmid) |
| Listeria_monocytogenes_1639_str73        | Listeria_monocytogenes | CP025083.1        | 58524      | 36.64%        | pLM330006(pLM33)          |
| Listeria_monocytogenes_1639_str92        | Listeria_monocytogenes | CP053631.1        | 55803      | 34.93%        | M640p00130(J1776plasmid)  |
| Listeria_monocytogenes_1639_str93        | Listeria_monocytogenes | CP020829.1        | 67033      | 36.43%        | repA(pLM5578)             |
| Listeria_monocytogenes_1639_str94        | Listeria_monocytogenes | CP006612.1        | 55804      | 34.92%        | M640p00130(J1776plasmid)  |
| Listeria_monocytogenes_1639_str95        | Listeria_monocytogenes | CP006613.1        | 55804      | 34.92%        | M640p00130(J1776plasmid)  |
| Listeria_monocytogenes_1639_str96        | Listeria_monocytogenes | CP006614.1        | 55803      | 34.92%        | M640p00130(J1776plasmid)  |
| Listeria_monocytogenes_1639_str99        | Listeria_monocytogenes | CP053633.1        | 55798      | 34.92%        | M640p00130(J1776plasmid)  |
| Listeria_monocytogenes_6179_1288295      | Listeria_monocytogenes | HG813250.1        | 62206      | 36.53%        | repA(pLM5578)             |
| Listeria_monocytogenes_FSL_J1-208_393119 | Listeria_monocytogenes | CP062128.1        | 77825      | 34.02%        | LMIVRS16815(pLMIV)        |
| Listeria_monocytogenes_R479a_1437838     | Listeria_monocytogenes | HG813248.1        | 86652      | 36.98%        | repA(pLGUG1)              |
| Listeria_monocytogenes_SLCC2372_932920   | Listeria_monocytogenes | FR667691.1        | 50100      | 35.48%        | pLM330006(pLM33)          |
| Listeria_monocytogenes_SLCC2755_932919   | Listeria_monocytogenes | FR667692.1        | 57780      | 36.04%        | pLM330006(pLM33)          |
| Listeria_seeligeri_1640_str1             | Listeria_seeligeri     | CP063072.1        | 60659      | 34.09%        | pLIS5                     |
| Listeria_grayi_1641                      | Listeria_grayi         | CABKNG010000004.1 | 68061      | 37.15%        | repA(pLGUG1)              |
| Listeria_innocua_1642_str4               | Listeria_innocua       | CP071180.1        | 93516      | 35.99%        | pLM330006(pLM33)          |
| Listeria_monocytogenes_1639_str41        | Listeria_monocytogenes | CP090053.1        | 63873      | 37.23%        | pLM330006(pLM33)          |
| Listeria_grayi_1641_str1                 | Listeria_grayi         | UGPG01000002.1    | 47088      | 35.46%        | repA(pLGUG1)              |
