# Supplementary material for: Comparative Genomics Reveal the Utilization Ability of Variable Carbohydrates as Key Genetic Features of Listeria Pathogens in Their Pathogenic Lifestyles
Source: MDPI journal article supplement (doi:10.3390/pathogens11121430), 2022-11-28
Supplement: s1 [file s1]

Table S6. Unique genes of *Listeria* pathogen (UGLP) referenced to *L.monocytogenes* EGD-e\_169963

| ORF_id  | Sequence_id | Group_id   | start  | end    | strand | COG_id  | COG_annotation                                                            | VDB_annotation | Uniprot_annotation                                                                                                                                                                       |
|---------|-------------|------------|--------|--------|--------|---------|---------------------------------------------------------------------------|----------------|------------------------------------------------------------------------------------------------------------------------------------------------------------------------------------------|
| orf_5   | ALS191824.1 | group_1688 | 4869   | 5981   | -      | COG1195 | L/Recombinational DNA repair ATPase RecF/RecF                             | -              | DNA replication and repair protein RecF OS= <i>Listeria monocytogenes</i> serovar 1/2a (strain ATCC BAA-679 / EGD-e) OX=169963 GN=recF Pe-3 SV=1                                         |
| orf_8   | ALS191824.1 | group_1331 | 10728  | 12242  | -      | COG5302 | I/Phosphatidylserine/ phosphatidylglycerophosphate/cardiolipin synth      | -              | Cardiolipin synthase 1 OS= <i>Bacillus cereus</i> (strain ATCC 14579 / DSM 31 / CCUG 7414 / JCM 2152 / NBRC 15305 / NCIMB 9437 / NCTC 2599 / NRI 8-3711) OX=226900 GN=c1s Pe-3 SV=1      |
| orf_9   | ALS191824.1 | group_1272 | 12250  | 12776  | -      | COG1670 | R/Protein N-acetyltransferase, Bim/RimI family/BimI                       | -              | Spermidine N(1)-acetyltransferase OS= <i>Wigglesworthia glossinidia</i> brevipalpis (strain ATCC-36870) GN=spd Pe-3 SV=1                                                                 |
| orf_11  | ALS191824.1 | group_1364 | 13843  | 14814  | -      | COG3407 | I/Mevalonate pyrophosphate decarboxylase/MVD/Lisproindole biosyn          | -              | -                                                                                                                                                                                        |
| orf_13  | ALS191824.1 | group_537  | 16219  | 17325  | -      | COG1622 | C/Heme/copper-type cytochrome/quinol oxidase, subunit 2/CyoAa             | -              | Probable quinol oxidase subunit 2 OS=Staphylococcus epidermidis (strain ATCC 12228 / FDA P1 1200) OX=169963 GN=cyoAa Pe-3 SV=1                                                           |
| orf_15  | ALS191824.1 | group_1813 | 19311  | 19923  | -      | COG1845 | C/Heme/copper-type cytochrome/quinol oxidase, subunit 3/CyoCb             | -              | Quinol oxidase subunit 3 OS= <i>Bacillus subtilis</i> (strain 168) OX=224308 GN=cyoCb Pe-1 SV=1                                                                                          |
| orf_16  | ALS191824.1 | group_1520 | 19924  | 20256  | -      | COG1325 | C/Heme/copper-type cytochrome/quinol oxidase, subunit 4/CyoD              | -              | Quinol oxidase subunit 4 OS= <i>Bacillus subtilis</i> (strain ATCC 22029 / NRI 8-3447 / W3) OX=655816 GN=cyoD Pe-1 SV=1                                                                  |
| orf_22  | ALS191824.1 | group_2197 | 25351  | 25839  | -      | COG3444 | G/Phosphotransferase system, mannose/fructose/N-acetylglactosai-          | -              | PTS system sorbose-specific EIIb component OS= <i>Lactobacillus casei</i> OX=1582 GN=sorB Pe-1 SV=1                                                                                      |
| orf_24  | ALS191824.1 | group_20   | 26646  | 27467  | -      | COG3716 | G/Phosphotransferase system, mannose/fructose/N-acetylglactosai-          | -              | -                                                                                                                                                                                        |
| orf_27  | ALS191824.1 | group_2179 | 29263  | 31004  | -      | COG2190 | G/Phosphotransferase system IA component/NagE                             | -              | -                                                                                                                                                                                        |
| orf_31  | ALS191824.1 | group_2241 | 33397  | 34452  | -      | COG1609 | K/DNA-binding transcriptional regulator, LacI/PurK family/PurK            | -              | PTS system beta-glucoside-specific EIIBcA component OS= <i>Alkalihalobacillus halodurans</i> (strain ATCC BAA-125 / DSM 18197 / FERM 7344 / JCM 9153 / C-125) OX=272558 GN=hgP Pe-3 SV=1 |
| orf_32  | ALS191824.1 | group_2260 | 34654  | 35619  | -      | COG1940 | G/Sugar kinase of the NBD/HSP70 family, may contain an N-termin-          | -              | -                                                                                                                                                                                        |
| orf_33  | ALS191824.1 | group_2232 | 35616  | 38018  | -      | -       | -                                                                         | -              | -                                                                                                                                                                                        |
| orf_35  | ALS191824.1 | group_2236 | 39885  | 40470  | -      | COG4949 | M/Glucosamine 6-phosphate synthase, contains amidotransferase             | -              | -                                                                                                                                                                                        |
| orf_60  | ALS191824.1 | group_264  | 64950  | 66146  | -      | COG4499 | U/ESX protein secretion system component YufK/YufK                        | -              | -                                                                                                                                                                                        |
| orf_61  | ALS191824.1 | group_223  | 66160  | 70656  | -      | COG1674 | D/DNA segregation ATPase FtsK/SpoIIIE or related protein/FtsK             | -              | -                                                                                                                                                                                        |
| orf_75  | ALS191824.1 | group_1268 | 79817  | 80869  | -      | COG2169 | L/Methylphosphotriester-DNA-protein-cysteine methyltransferase (-         | -              | -                                                                                                                                                                                        |
| orf_76  | ALS191824.1 | group_2078 | 80881  | 81330  | -      | COG1353 | S/Uncharacterized conserved protein YhmI, contains pentapeptide res-      | -              | -                                                                                                                                                                                        |
| orf_77  | ALS191824.1 | group_450  | 81661  | 82617  | -      | COG1052 | CH/Lactate dehydrogenase or related 2-hydroxyacid dehydrogenase           | -              | Putative 2-hydroxyacid dehydrogenase SH0752 OS=Staphylococcus haemolyticus (strain JCS1435) OX=279808 GN=SH0752 Pe-3 SV=1                                                                |
| orf_82  | ALS191824.1 | group_42   | 86323  | 86691  | -      | COG0789 | K/DNA-binding transcriptional regulator, MerR family/SoxR                 | -              | HTH-type transcriptional regulator HmrR OS= <i>Rhizobium leguminosarum</i> bv. viciae OX=387 GN=hmrR Pe-4 SV=1                                                                           |
| orf_84  | ALS191824.1 | group_2070 | 88121  | 88810  | -      | COG0664 | T;cAMP-binding domain of CRP or a regulatory subunit of cAMP-dep-         | -              | -                                                                                                                                                                                        |
| orf_86  | ALS191824.1 | group_1611 | 94764  | 97070  | -      | -       | -                                                                         | -              | -                                                                                                                                                                                        |
| orf_88  | ALS191824.1 | group_1918 | 97366  | 98412  | -      | -       | -                                                                         | -              | -                                                                                                                                                                                        |
| orf_90  | ALS191824.1 | group_2084 | 99902  | 100771 | -      | COG0224 | C/FoF1-type ATP synthase, gamma subunit;AtpG;FoF1-type ATP synt-          | -              | -                                                                                                                                                                                        |
| orf_92  | ALS191824.1 | group_1947 | 102155 | 102478 | -      | COG3555 | C/FoF1-type ATP synthase, epsilon subunit;AtpE;FoF1-type ATP synt-        | -              | -                                                                                                                                                                                        |
| orf_93  | ALS191824.1 | group_1919 | 102466 | 103028 | -      | -       | -                                                                         | -              | -                                                                                                                                                                                        |
| orf_96  | ALS191824.1 | group_114  | 105123 | 105929 | -      | COG3715 | G/Phosphotransferase system, mannose/fructose/N-acetylglactosai-          | -              | PTS system sorbose-specific EIIC component OS= <i>Klebsiella pneumoniae</i> OX=573 GN=sorA Pe-2 SV=1                                                                                     |
| orf_99  | ALS191824.1 | group_2097 | 107499 | 107849 | -      | COG4898 | S/Uncharacterized conserved protein                                       | -              | -                                                                                                                                                                                        |
| orf_102 | ALS191824.1 | group_2046 | 109349 | 109720 | -      | COG1747 | G/Chitodextrinase;                                                        | -              | -                                                                                                                                                                                        |
| orf_103 | ALS191824.1 | group_1371 | 110013 | 112283 | -      | COG3979 | G/Chitodextrinase;                                                        | -              | -                                                                                                                                                                                        |
| orf_106 | ALS191824.1 | group_2083 | 115087 | 116829 | -      | COG1132 | V;ABC-type multidrug transport system, ATPase and permease comp-          | -              | -                                                                                                                                                                                        |
| orf_108 | ALS191824.1 | group_2262 | 117841 | 118956 | -      | COG0657 | L/acetyl esterase/lipase/Aes;                                             | -              | -                                                                                                                                                                                        |
| orf_109 | ALS191824.1 | group_1984 | 119060 | 119770 | -      | COG2200 | T;EAL domain, c-di-GMP-specific phosphodiesterase class I (or its em-     | -              | -                                                                                                                                                                                        |
| orf_113 | ALS191824.1 | group_185  | 121664 | 122092 | -      | -       | -                                                                         | -              | -                                                                                                                                                                                        |
| orf_114 | ALS191824.1 | group_144  | 122104 | 122520 | -      | -       | -                                                                         | -              | -                                                                                                                                                                                        |
| orf_126 | ALS191824.1 | group_221  | 130249 | 130671 | -      | COG4824 | X/Phage-related holin (Lysis protein)                                     | -              | Uncharacterized protein Lmo0128 OS= <i>Listeria monocytogenes</i> serovar 1/2a (strain ATCC BAA-679 / EGD-e) OX=169963 GN=lmo0128 Pe-3 SV=1                                              |
| orf_127 | ALS191824.1 | group_1849 | 130653 | 131380 | -      | COG0860 | N;N-acetylglucosyl-L-alanine amidase/AmeC;                                | -              | Sporulation-specific N-acetylglucosyl-L-alanine amidase OS= <i>Bacillus subtilis</i> (strain 168) OX=224308 GN=ameC Pe-1 SV=1                                                            |
| orf_128 | ALS191824.1 | group_1295 | 131419 | 133767 | -      | COG0737 | PV;2',3'-cyclic-nucleotide 2'-phosphodiesterase/5'- or 3'-nucleotidase    | -              | Cell wall protein Lmo0130 OS= <i>Listeria monocytogenes</i> serovar 1/2a (strain ATCC BAA-679 / EGD-e) OX=169963 GN=lmo0130 Pe-1 SV=1                                                    |
| orf_130 | ALS191824.1 | group_562  | 134782 | 136290 | -      | COG4109 | K/Predicted transcriptional regulator containing CBS domains/Tol          | -              | Inosine 5'-monophosphate dehydrogenase OS= <i>Trichomonas foetus</i> OX=56690 GN=IMPDH Pe-1 SV=1                                                                                         |
| orf_132 | ALS191824.1 | group_1396 | 136714 | 136992 | -      | COG2388 | R/Predicted acetyltransferase, GNAT superfamily/YidJ                      | -              | Uncharacterized protein YidJ OS= <i>Escherichia coli</i> (strain K12) OX=83333 GN=yidJ Pe-1 SV=1                                                                                         |
| orf_133 | ALS191824.1 | group_1692 | 137323 | 138897 | -      | COG1747 | E;ABC-type transport system, periplasmic component/DppA                   | -              | -                                                                                                                                                                                        |
| orf_153 | ALS191824.1 | group_2238 | 152648 | 153328 | -      | COG0664 | T;cAMP-binding domain of CRP or a regulatory subunit of cAMP-dep-         | -              | -                                                                                                                                                                                        |
| orf_154 | ALS191824.1 | group_1863 | 153608 | 155947 | -      | COG1199 | L/Rad3-related DNA helicase DmgD/DmgD                                     | -              | -                                                                                                                                                                                        |
| orf_155 | ALS191824.1 | group_81   | 155993 | 156805 | -      | COG0561 | HR;Hydroxymethylpyrimidine pyrophosphatase and other HAD fami-            | -              | Putative phosphatase YaeH OS= <i>Bacillus subtilis</i> (strain 168) OX=224308 GN=yaeH Pe-3 SV=1                                                                                          |
| orf_156 | ALS191824.1 | group_125  | 157089 | 159470 | -      | COG4932 | M/Clumping factor A-related surface protein, MSCRAMM (microbial-          | -              | -                                                                                                                                                                                        |
| orf_157 | ALS191824.1 | group_125  | 159663 | 161378 | -      | COG4932 | M/Clumping factor A-related surface protein, MSCRAMM (microbial-          | -              | -                                                                                                                                                                                        |
| orf_158 | ALS191824.1 | group_1449 | 161420 | 162250 | -      | COG1363 | T;Anti-anti-sigma regulatory factor (antagonist of anti-sigma factor);J   | -              | -                                                                                                                                                                                        |
| orf_160 | ALS191824.1 | group_1817 | 163665 | 164298 | -      | COG1774 | T;Cell fate regulator YnfT, FSP1 superfamily (containing sporulation, co- | -              | Stage 0 sporulation protein YnfT OS= <i>Bacillus subtilis</i> (strain 168) OX=224308 GN=ynfT Pe-4 SV=1                                                                                   |
| orf_162 | ALS191824.1 | group_1328 | 164735 | 165508 | -      | COG2126 | J;RNALysal Val 437 N6-methyltransferase TrmM6;TrmM6;RNA modification      | -              | Protein RNALysal Val 437 N6-methyltransferase YacO OS= <i>Bacillus subtilis</i> (strain 168) OX=224308 GN=yacO Pe-3 SV=1                                                                 |
| orf_163 | ALS191824.1 | group_1334 | 165492 | 165764 | -      | COG2827 | L/Predicted endonuclease, GII-Y/GII superfamily/YnQd                      | -              | UF0213 protein lmo0166 OS= <i>Listeria monocytogenes</i> serovar 1/2a (strain ATCC BAA-679 / EGD-e) OX=169963 GN=lmo0166 Pe-3 SV=1                                                       |
| orf_192 | ALS191824.1 | group_160  | 198201 | 199409 | -      | COG0577 | V;ABC-type antimicrobial peptide transport system, permease comp-         | -              | Macrolide export ATP-binding/permease protein MacB OS= <i>Bdellovibrio bacteriovorus</i> (strain ATCC 15356 / DSM 50701 / NCIMB 9529 / HD100) OX=264462 GN=macB Pe-3 SV=1                |
| orf_198 | ALS191824.1 | group_2119 | 202641 | 203597 | -      | COG0462 | F;Phosphoribosylpyrophosphate synthetase/PraS;Histidine biosynth-         | -              | Ribose-phosphate pyrophosphokinase 1 OS= <i>Listeria monocytogenes</i> serovar 1/2a (strain ATCC BAA-679 / EGD-e) OX=169963 GN=prs1 Pe-3 SV=1                                            |
| orf_199 | ALS191824.1 | group_2339 | 204624 | 205577 | -      | -       | -                                                                         | -              | -                                                                                                                                                                                        |
| orf_199 | ALS191824.1 | group_2330 | 205819 | 207408 | -      | -       | -                                                                         | -              | -                                                                                                                                                                                        |
| orf_200 | ALS191824.1 | group_2323 | 207739 | 209271 | -      | COG3227 | O;Zn-dependent metalloprotease (Neutral protease B);LasB                  | -              | -                                                                                                                                                                                        |
| orf_202 | ALS191824.1 | group_1543 | 215721 | 216344 | -      | COG0185 | J;Ribosomal protein L25 (general stress protein C23);RplJ/Ribosome 5-     | -              | -                                                                                                                                                                                        |
| orf_209 | ALS191824.1 | group_1276 | 216434 | 217018 | -      | COG0456 | J;Ribosomal protein S18 acetylase Rimi and related acetyltransferase      | -              | -                                                                                                                                                                                        |
| orf_212 | ALS191824.1 | group_484  | 221370 | 222569 | -      | COG5841 | D;Stage V sporulation protein SpoVb/SpoIif, required for spore cort-      | -              | -                                                                                                                                                                                        |
| orf_213 | ALS191824.1 | group_1495 | 222981 | 223261 | -      | COG0188 | R;Ribosomal S05 subunit-recycling heat shock protein, contains 54 do-     | -              | -                                                                                                                                                                                        |
| orf_217 | ALS191824.1 | group_240  | 226854 | 228929 | -      | COG0465 | O;ATP-dependent Zn proteases/HflB;                                        | -              | -                                                                                                                                                                                        |
| orf_220 | ALS191824.1 | group_365  | 230840 | 231766 | -      | COG0031 | E;Cysteine synthase;CysK/Cysteine biosynthesis                            | -              | -                                                                                                                                                                                        |
| orf_221 | ALS191824.1 | group_1333 | 231692 | 233477 | -      | COG0024 | H;Dihydroxypropanate synthase;FolP;Folate biosynthesis                    | -              | -                                                                                                                                                                                        |
| orf_223 | ALS191824.1 | group_1603 | 233855 | 234337 | -      | COG0813 | 7-8-dihydro-6-hydroxymethylpterin pyrophosphokinase (folate bio-          | -              | -                                                                                                                                                                                        |
| orf_224 | ALS191824.1 | group_1687 | 234414 | 235409 | -      | COG0942 | J;RNA-dihydrouridine synthase;DusA;RNA modification                       | -              | -                                                                                                                                                                                        |
| orf_225 | ALS191824.1 | group_1471 | 235524 | 237020 | -      | COG1190 | J;Lysyl-tRNA synthetase (class II);LysU;Aminoacyl-tRNA synthetases -      | -              | -                                                                                                                                                                                        |
| orf_232 | ALS191824.1 | group_1422 | 255794 | 256498 | -      | COG2111 | L;2'-methyl-2'-erythritol 4-phosphate cytidyllyltransferase/igbJ/igpJ     | -              | -                                                                                                                                                                                        |
| orf_236 | ALS191824.1 | group_1469 | 261380 | 262061 | -      | COG0566 | J;RNALys G18 (ribosome 2'-O)-methylase SpoI1/SpoI1;RNA modifica-          | -              | -                                                                                                                                                                                        |
| orf_240 | ALS191824.1 | group_1675 | 262657 | 263262 | -      | COG5595 | K/DNA-directed RNA polymerase specialized sigma subunit, sigma24          | -              | -                                                                                                                                                                                        |
| orf_241 | ALS191824.1 | group_1527 | 263535 | 263714 | -      | COG0690 | U;Preprotein translocase subunit SecE;SecE                                | -              | -                                                                                                                                                                                        |
| orf_243 | ALS191824.1 | group_1830 | 264432 | 264802 | -      | -       | -                                                                         | -              | -                                                                                                                                                                                        |
| orf_244 | ALS191824.1 | group_1731 | 265029 | 265454 | -      | COG0080 | J;Ribosomal protein L11;RplK;Ribosome S05 subunit                         | -              | 50S ribosomal protein L11 OS= <i>Listeria welshimeri</i> serovar 6b (strain ATCC 35897 / DSM 20650 / CP 8149 / NCTC 11857 / SLCC 5334 / V8) OX=386043 GN=rplK Pe-3 SV=1                  |
| orf_252 | ALS191824.1 | group_1331 | 270372 | 270977 | -      | COG2813 | J;L16S rRNA G1207 methylase RsmC/RsmC;L16S RNA modification               | -              | Uncharacterized protein YhmB OS= <i>Bacillus subtilis</i> (strain 168) OX=224308 GN=yhmB Pe-3 SV=1                                                                                       |
| orf_256 | ALS191824.1 | group_2118 | 280410 | 280955 | -      | COG1011 | H;FMN and 5-amino-6-[5-phospho-D-ribitylamino]uracil phosphatase          | -              | -                                                                                                                                                                                        |
| orf_258 | ALS191824.1 | group_2    | 282755 | 284227 | -      | COG4886 | K;Leucine-rich repeat (LRR) protein/LRR                                   | -              | Internalin H OS= <i>Listeria monocytogenes</i> serovar 1/2a (strain ATCC BAA-679 / EGD-e) OX=169963 GN=ihH Pe-1 SV=1                                                                     |
| orf_259 | ALS191824.1 | group_2    | 284365 | 286011 | -      | COG4886 | K;Leucine-rich repeat (LRR) protein/LRR                                   | -              | Internalin H OS= <i>Listeria monocytogenes</i> serovar 1/2a (strain ATCC BAA-679 / EGD-e) OX=169963 GN=ihH Pe-1 SV=1                                                                     |
| orf_260 | ALS191824.1 | group_2    | 286219 | 287718 | -      | COG4886 | K;Leucine-rich repeat (LRR) protein/LRR                                   | -              | Internalin H OS= <i>Listeria monocytogenes</i> serovar 1/2a (strain ATCC BAA-679 / EGD-e) OX=169963 GN=ihH Pe-1 SV=1                                                                     |
| orf_261 | ALS191824.1 | group_1840 | 287853 | 288992 | -      | COG0624 | E;Acetylornithine decarboxylase/Succinyl-diaminopimelate desuccinyla-     | -              | Probable succinyl-diaminopimelate desuccinylase OS=Staphylococcus aureus (strain SMS252) OX=282458 GN=dapE Pe-3 SV=1                                                                     |
| orf_264 | ALS191824.1 | group_488  | 295923 | 295928 | -      | COG0408 | G;Broad specificity phosphatase PhdE/PhdE                                 | -              | -                                                                                                                                                                                        |
| orf_268 | ALS191824.1 | group_81   | 295401 | 296213 | -      | COG0561 | HR;Hydroxymethylpyrimidine pyrophosphatase and other HAD fami-            | -              | Putative phosphatase YaeH OS= <i>Bacillus subtilis</i> (strain 168) OX=224308 GN=yaeH Pe-3 SV=1                                                                                          |
| orf_269 | ALS191824.1 | group_1299 | 296349 | 296852 | -      | -       | -                                                                         | -              | -                                                                                                                                                                                        |
| orf_270 | ALS191824.1 | group_2327 | 296889 | 297551 | -      | COG0664 | T;cAMP-binding domain of CRP or a regulatory subunit of cAMP-dep-         | -              | -                                                                                                                                                                                        |
| orf_271 | ALS191824.1 | group_2062 | 297810 | 298652 | -      | COG2333 | C/DNA uptake channel protein CmtC/C-terminal domain of cAMP-dep-          | -              | -                                                                                                                                                                                        |
| orf_273 | ALS191824.1 | group_2048 | 299604 | 300578 | -      | COG0673 | R/Predicted dehydrogenase;MvM                                             | -              | -                                                                                                                                                                                        |
| orf_274 | ALS191824.1 | group_1516 | 300617 | 301717 | -      | COG3839 | G;ABC-type sugar transport system, ATPase component MalK/MalK             | -              | Oligosaccharides import ATP-binding protein MsmX OS= <i>Bacillus subtilis</i> (strain 168) OX=224308 GN=msmX Pe-1 SV=1                                                                   |
| orf_276 | ALS191824.1 | group_489  | 304133 | 304684 | -      | COG0602 | H;Organic radical activating enzyme NrdY/QaeE;QueE;RNA modifica-          | -              | Anaerobic ribonucleoside-triphosphate reductase-activating protein OS= <i>Salmonella typhi</i> OX=90370 GN=nrdG Pe-3 SV=1                                                                |
| orf_277 | ALS191824.1 | group_1893 | 304942 | 305613 | -      | COG0664 | T;cAMP-binding domain of CRP or a regulatory subunit of cAMP-dep-         | -              | -                                                                                                                                                                                        |
| orf_279 | ALS191824.1 | group_571  | 306644 | 307306 | -      | COG2011 | E;ABC-type methionine transport system, permease component;MetI           | -              | Probable D-methionine transport system permease protein MetI OS= <i>Vibrio cholerae</i> serotype O1 (strain ATCC 39315 / E1 Tor Inaba N16961) OX=243277 GN=metI Pe-3 SV=1                |
| orf_280 | ALS191824.1 | group_1490 | 307303 | 308319 | -      | COG1135 | E;ABC-type methionine transport system, ATPase component;AboC             | -              | Methionine import ATP-binding protein MetN OS= <i>Listeria monocytogenes</i> serovar 1/2a (strain ATCC BAA-679 / EGD-e) OX=169963 GN=metN Pe-3 SV=1                                      |
| orf_281 | ALS191824.1 | group_1595 | 308334 | 309155 | -      | COG0464 | T;ABC-type metal ion transport system, periplasmic component/YnfA         | -              | D-methionine-binding lipoprotein MetQ OS= <i>Salmonella typhi</i> OX=90370 GN=metQ Pe-3 SV=1                                                                                             |
| orf_285 | ALS191824.1 | group_530  | 313659 | 314981 | -      | COG4863 | T;YnfC protein, regulator of the YnfHr two-component signal transd-       | -              | -                                                                                                                                                                                        |
| orf_287 | ALS191824.1 | group_222  | 315945 | 316775 | -      | COG1235 | P/Phosphoribosyl 1,2-cyclic phosphate phosphodiesterase;PhpP              | -              | Putative metallo-hydrolase YnfC OS= <i>Bacillus subtilis</i> (strain 168) OX=224308 GN=ynfC Pe-2 SV=1                                                                                    |
| orf_288 | ALS191824.1 | group_1404 | 316873 | 318375 | -      | COG0265 | O;Peptidic serum protease, S1-C subfamily, contain C-terminal PC-         | -              | Uncharacterized serine protease YnfA OS= <i>Bacillus subtilis</i> (strain 168) OX=224308 GN=ynfA Pe-3 SV=2                                                                               |
| orf_292 | ALS191824.1 | group_1595 | 321490 | 322128 | -      | COG4886 | K;Leucine-rich repeat (LRR) protein/LRR                                   | -              | Internalin I OS= <i>Listeria monocytogenes</i> serovar 1/2a (strain ATCC BAA-679 / EGD-e) OX=169963 GN=ihI Pe-2 SV=1                                                                     |
| orf_298 | ALS191824.1 | group_28   | 360936 | 366272 | -      | COG0673 | R/Predicted dehydrogenase;MvM                                             | -              | Uncharacterized oxidoreductase YnfX OS= <i>Escherichia coli</i> (strain K12) OX=83333 GN=ynfX Pe-1 SV=1                                                                                  |
| orf_368 | ALS191824.1 | group_1483 | 397340 | 398053 | -      | COG2188 | K/DNA-binding transcriptional regulator, GntR family/MngR                 | -              | -                                                                                                                                                                                        |
