# Supplementary material for: Comparative Genomics Reveal the Utilization Ability of Variable Carbohydrates as Key Genetic Features of Listeria Pathogens in Their Pathogenic Lifestyles
Source: MDPI journal article supplement (doi:10.3390/pathogens11121430), 2022-11-28
Supplement: s1 [file s1]

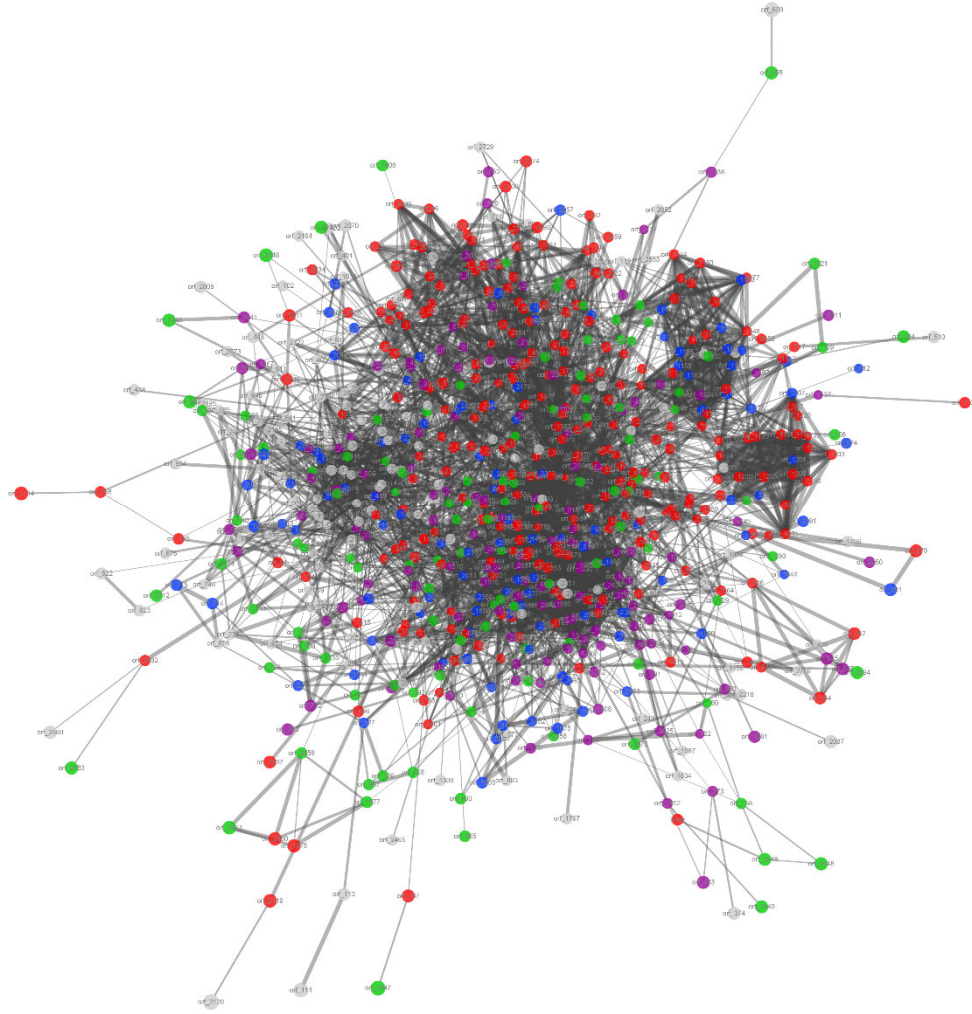

Figure S1. The protein-protein interaction network analysis of UGLP. The PPI network of UGLP referenced with *L. monocytogenes* EGD-e 169963 and the names of nodes corresponded to Table S6. Only those networks with number of nodes greater than 3 were shown in the graph. The edges of network represented the relationship of protein-protein interaction, and their line thickness represented the confidence of the relationship between nodes. Different colors of nodes reflected the different protein function categories: the red represented the basic substance transport and metabolism; the purple represented the genetic information processing, including replication, transcription, and translation; the blue represented the cellular processes, including cell wall/membrane/envelope biogenesis and cell motility; the green represented the bacteria-environment interaction, including signal transduction, extracellular structures, and defense mechanism; the grey represented the protein without meaningful function annotation.
