# Supplementary material for: Comparative Genomics Reveal the Utilization Ability of Variable Carbohydrates as Key Genetic Features of Listeria Pathogens in Their Pathogenic Lifestyles
Source: MDPI journal article supplement (doi:10.3390/pathogens11121430), 2022-11-28
Supplement: s1 [file s1]

Table S5. Unique genes of *Listeria* pathogens (UGLP) referenced to Livanovii 1638

| ORF_id  | Sequence_id | Group_id   | start  | end      | strand | COG_id  | COG_annotation                                                                  | VFDB_annotation                                                                                                               | Uniprot_annotation                                                                                                                                                                          |
|---------|-------------|------------|--------|----------|--------|---------|---------------------------------------------------------------------------------|-------------------------------------------------------------------------------------------------------------------------------|---------------------------------------------------------------------------------------------------------------------------------------------------------------------------------------------|
| orf_5   | CPO34771.1  | group_223  | 2999   | 7495     | -      | COG1674 | D/DNA segregation ATPase FtsK/SpoIIIE or related protein;FtsK;                  | -                                                                                                                             | Type VII secretion system protein EscC OS=Staphylococcus aureus (strain N315)  OX-158879 GNescC PE-3 SV=1                                                                                   |
| orf_6   | CPO34771.1  | group_264  | 7509   | 7937     | -      | COG4649 | U/E5X protein secretion system component YnfC;YnfC;                             | -                                                                                                                             | Uncharacterized protein EscK OS=Staphylococcus aureus (strain N315)  OX-158879 GNescC PE-3 SV=1                                                                                             |
| orf_7   | CPO34771.1  | group_264  | 8045   | 8587     | -      | COG4649 | U/E5X protein secretion system component YnfC;YnfC;                             | -                                                                                                                             | Uncharacterized protein EscK OS=Staphylococcus aureus (strain N315)  OX-158879 GNescC PE-3 SV=1                                                                                             |
| orf_31  | CPO34771.1  | group_2236 | 33169  | 34254    | -      | COG4949 | M/Glucosamine 6-phosphate synthetase, contains amidotransferase and phos-       | -                                                                                                                             | PTS system beta-glucose-6-phosphate isomerase (isomerizing) OS=Pyrococcus furiosus (strain ATCC 43587 / DSM 3638 / VCB)  OX-186497 GN-glmS PE-3 SV=3                                        |
| orf_33  | CPO34771.1  | group_2212 | 35627  | 38029    | -      | -       | -                                                                               | -                                                                                                                             | -                                                                                                                                                                                           |
| orf_34  | CPO34771.1  | group_2260 | 38026  | 38991    | -      | COG1940 | Kc/Sugar kinase of the NBD/HSF70 family, may contain an R-terminal HTH dor-     | -                                                                                                                             | Glucokinase OS=Alkalibacillus halodurans (strain ATCC BAA-125 / DSM 18197 / FERM 7344 / JCM 9153 / C-125)  OX-272558 GN-glcK PE-3 SV=1                                                      |
| orf_35  | CPO34771.1  | group_2241 | 39194  | 40252    | -      | COG1609 | K/DNA-binding transcriptional regulator, Lac/PurK family;PurK;                  | -                                                                                                                             | HTH-type transcriptional repressor PurK OS=Haemophilus influenzae (strain PT33)  OX-74930 GNpurK PE-3 SV=1                                                                                  |
| orf_45  | CPO34771.1  | group_1367 | 48706  | 49513    | -      | COG2100 | G/Glucophosphatase system (IA component);GlcP;                                  | -                                                                                                                             | PTS system beta-glucose-6-phosphate isomerase (isomerizing) OS=Alkalibacillus halodurans (strain ATCC BAA-125 / DSM 18197 / FERM 7344 / JCM 9153 / C-125)  OX-272558 GN-glcP PE-3 SV=1      |
| orf_48  | CPO34771.1  | group_1520 | 51509  | 51841    | -      | COG1325 | C/Heme/copper-type cytochrome/quinol oxidase, subunit 4;Cyod                    | -                                                                                                                             | Quinol oxidase subunit 4 OS=Listeria sp. (strain ATCC 23059 / NRRL B-14472 / W23)  OX-655816 GN-cyod PE-1 SV=1                                                                              |
| orf_49  | CPO34771.1  | group_1819 | 51843  | 52454    | -      | COG1845 | C/Heme/copper-type cytochrome/quinol oxidase, subunit 3;Cyoc                    | -                                                                                                                             | Quinol oxidase subunit 3 OS=Listeria sp. (strain ATCC 23059 / NRRL B-14472 / W23)  OX-655816 GN-cyoc PE-1 SV=1                                                                              |
| orf_51  | CPO34771.1  | group_1537 | 54493  | 55545    | -      | COG1622 | C/Heme/copper-type cytochrome/quinol oxidase, subunit 2;Cyoc                    | -                                                                                                                             | Probable quinol oxidase subunit 2 OS=Staphylococcus epidermidis (strain ATCC 12228 / FDA PI 1200 / VKM 8-1787)  OX-272626 GN-cyoc PE-1 SV=1                                                 |
| orf_53  | CPO34771.1  | group_1364 | 56949  | 57920    | -      | COG3007 | I/Mevalonate pyrophosphate decarboxylase;MVD;isoprenoid biosynthesis            | -                                                                                                                             | Diphosphomevalonate decarboxylase OS=Dictyostelium discoideum  OX-44689 GN-mvd PE-3 SV=1                                                                                                    |
| orf_55  | CPO34771.1  | group_1722 | 58989  | 59507    | -      | COG1670 | JQ/Protein N-acetyltransferase, RimM/RimI, family;RimI;                         | -                                                                                                                             | Spermidine N(1)-acetyltransferase OS=Wigglesworthia glossinidia brevipalpis  OX-36870 GN-speG PE-3 SV=1                                                                                     |
| orf_56  | CPO34771.1  | group_331  | 59523  | 61037    | -      | COG1502 | I/Phosphatidylserine/phosphatidylglycerophosphate/cardiolipin synthase;CisF-    | -                                                                                                                             | Cardiolipin synthase 1 OS=Listeria anthracis  OX-1392 GN-cds1 PE-3 SV=1                                                                                                                     |
| orf_59  | CPO34771.1  | group_1688 | 65780  | 66892    | -      | COG1195 | I/Recombinational DNA repair ATPase RecF;RecF;                                  | -                                                                                                                             | DNA replication and repair protein RecF OS=Listeria welshimeri serovar 6b (strain ATCC BAA-680 / CLIP 11262)  OX-272626 GN-recF PE-3 SV=1                                                   |
| orf_64  | CPO34771.1  | group_1960 | 71944  | 72414    | -      | -       | -                                                                               | -                                                                                                                             | -                                                                                                                                                                                           |
| orf_65  | CPO34771.1  | group_2024 | 72582  | 72716    | -      | COG0230 | J/Ribosomal protein L34;RplM;Ribosome 50S subunit                               | -                                                                                                                             | 50S ribosomal protein L34 OS=Listeria welshimeri serovar 6b (strain ATCC 35887 / DSM 20650 / CP 8149 / NCTC 11857 / SLCC 5334 / V8)  OX-386043 GN-rplM PE-3 SV=1                            |
| orf_69  | CPO34771.1  | group_1319 | 74741  | 75202    | -      | COG4405 | R/Predicted RNA binding protein YnfH, contains PUA-like ASCH domain;YnfH        | -                                                                                                                             | -                                                                                                                                                                                           |
| orf_71  | CPO34771.1  | group_215  | 7795   | 83789    | -      | COG1305 | G/Transglutaminase-like enzyme, putative cysteine proteinase;YnfA;              | -                                                                                                                             | -                                                                                                                                                                                           |
| orf_72  | CPO34771.1  | group_2160 | 83938  | 84963    | -      | COG1609 | K/DNA-binding transcriptional regulator, Lac/PurK family;PurK;                  | -                                                                                                                             | Uncharacterized HTH-type transcriptional regulator YnfW OS=Escherichia coli (strain K12)  OX-83333 GN-ynfW PE-4 SV=1                                                                        |
| orf_73  | CPO34771.1  | group_136  | 85189  | 86889    | -      | COG3366 | G/Glycosylase/amyase (phosphorylase);AmyA;                                      | -                                                                                                                             | Glucosylglycerate phosphorylase OS=Escherichia coli (strain K12)  OX-83333 GN-ygm PE-1 SV=2                                                                                                 |
| orf_74  | CPO34771.1  | group_2202 | 86886  | 88184    | -      | COG1653 | G/ABC-type glycerol 3-phosphate transport system, periplasmic component;U       | -                                                                                                                             | Putative ABC transporter periplasmic-binding protein YnfN OS=Escherichia coli (strain K12)  OX-83333 GN-ynfN PE-3 SV=1                                                                      |
| orf_75  | CPO34771.1  | group_2204 | 88251  | 89140    | -      | COG1612 | G/ABC-type sugar transport system, periplasmic component;U                      | -                                                                                                                             | Inner membrane ABC transporter periplasmic-binding protein YnfM OS=Escherichia coli (strain K12)  OX-83333 GN-ynfM PE-3 SV=1                                                                |
| orf_76  | CPO34771.1  | group_2177 | 89127  | 89978    | -      | COG3995 | G/ABC-type glycerol 3-phosphate transport system, periplasmic component;U       | -                                                                                                                             | Inner membrane ABC transporter periplasmic-binding protein YnfN OS=Escherichia coli (strain K12)  OX-83333 GN-ynfN PE-3 SV=1                                                                |
| orf_77  | CPO34771.1  | group_1769 | 89996  | 91048    | -      | COG1063 | ER/Threonine dehydrogenase or related D-dependent dehydrogenase;ThNc-           | -                                                                                                                             | D-2-glycidyl-D-glutamate OS=Escherichia coli (strain K12)  OX-83333 GN-ygd PE-1 SV=1                                                                                                        |
| orf_78  | CPO34771.1  | group_2216 | 91058  | 91855    | -      | COG1082 | G/Sugar phosphatase isomerase/epimerase;YgR;                                    | -                                                                                                                             | 3-dehydroxy-D-glucose-4-epimerase OS=Escherichia coli (strain K12)  OX-83333 GN-ygd PE-1 SV=2                                                                                               |
| orf_79  | CPO34771.1  | group_1824 | 91911  | 92943    | -      | COG0673 | R/Predicted dehydrogenase;AldH;                                                 | -                                                                                                                             | D-glucose 3-dehydrogenase OS=Escherichia coli (strain K12)  OX-83333 GN-ygd PE-1 SV=1                                                                                                       |
| orf_83  | CPO34771.1  | group_1451 | 97021  | 97341    | -      | COG3118 | O/Chaperonin GroEL, contains thiodoxin-like and TPR-like domains, YnfN/-        | -                                                                                                                             | Thiodoxin 1 OS=Chlorobaculum tepidum (strain ATCC 49562 / DSM 12025 / NRRL 10386 / T15)  OX-194439 GN-trx1 PE-3 SV=1                                                                        |
| orf_84  | CPO34771.1  | group_1889 | 97400  | 97999    | -      | COG3560 | R/Fatty acid repression mutant protein (predicted oxidoreductase);FMR2;         | -                                                                                                                             | Putative nitroreductase HBN1 OS=Saccharomyces cerevisiae (strain ATCC 204508 / S288c)  OX-559292 GN-HBN1 PE-1 SV=1                                                                          |
| orf_90  | CPO34771.1  | group_538  | 111588 | 114777   | -      | COG0445 | I/tRNA U34 5'-carboxymethylaminomethyl modifying enzyme MnmG/Gda/Mn-            | -                                                                                                                             | tRNA uridine 5'-carboxymethylaminomethyl modification enzyme MnmG OS=Listeria monocytogenes serovar 1/2a (strain ATCC BAA-679 / EGD-e)  OX-169963 GN-mnmG PE-3 SV=1                         |
| orf_103 | CPO34771.1  | group_1625 | 118843 | 118842   | -      | -       | -                                                                               | -                                                                                                                             | -                                                                                                                                                                                           |
| orf_113 | CPO34771.1  | group_1374 | 126840 | 127598   | -      | -       | -                                                                               | -                                                                                                                             | -                                                                                                                                                                                           |
| orf_119 | CPO34771.1  | group_1287 | 133273 | 133170   | -      | -       | -                                                                               | -                                                                                                                             | -                                                                                                                                                                                           |
| orf_120 | CPO34771.1  | group_1335 | 133220 | 135550   | -      | COG2018 | N/Gamma-glutamylcysteine synthetase;GdaA;                                       | -                                                                                                                             | -                                                                                                                                                                                           |
| orf_123 | CPO34771.1  | group_1780 | 137826 | 138500   | -      | COG4858 | S/Uncharacterized membrane-anchored protein                                     | -                                                                                                                             | Glutathione biosynthesis bifunctional protein GshAB OS=Listeria welshimeri serovar 6b (strain ATCC 35887 / DSM 20650 / CP 8149 / NCTC 11857 / SLCC 5334 / V8)  OX-386043 GN-gshAB PE-3 SV=1 |
| orf_136 | CPO34771.1  | group_1841 | 148651 | 149181   | -      | COG2110 | J/O-acetyl-ADP-ribose deacetylase (regulator of RNase III), contains Macro dor- | -                                                                                                                             | Macro domain-containing protein Hmo2759 OS=Listeria monocytogenes serovar 1/2a (strain ATCC BAA-679 / EGD-e)  OX-169963 GN-hmo2759 PE-4 SV=1                                                |
| orf_137 | CPO34771.1  | group_1550 | 149464 | 150930   | -      | COG0517 | T/GS domain;CBS;                                                                | -                                                                                                                             | Inosine 5'-monophosphate dehydrogenase OS=Listeria sp. (strain 168)  OX-224308 GN-gshAB PE-1 SV=2                                                                                           |
| orf_140 | CPO34771.1  | group_1741 | 151337 | 157004   | -      | COG1286 | R/Predicted acyl esterase;                                                      | -                                                                                                                             | Coxiase esterase OS=Rhodococcus sp. (strain MB1 Brunei)  OX-104109 GN-cox PE-3 SV=1                                                                                                         |
| orf_143 | CPO34771.1  | group_87   | 160441 | 162162   | -      | COG1132 | V/ABC-type multidrug transport system, ATPase and permease component;M          | -                                                                                                                             | Uncharacterized ABC transporter ATP-binding protein YnfB OS=Listeria sp. (strain 168)  OX-224308 GN-ynfB PE-3 SV=1                                                                          |
| orf_146 | CPO34771.1  | group_2159 | 164728 | 165147   | -      | COG3871 | S/General stress protein 26 (function unknown);YnfA;                            | -                                                                                                                             | General stress protein 26 OS=Listeria sp. (strain 168)  OX-224308 GN-ynfA PE-1 SV=2                                                                                                         |
| orf_147 | CPO34771.1  | group_551  | 165483 | 166769   | -      | COG0072 | J/Seryl-tRNA synthetase;SerS;aminoacyl-tRNA synthetases                         | -                                                                                                                             | Serine-tRNA ligase OS=Listeria monocytogenes serovar 4a (strain HCC23)  OX-525236 GN-serS PE-3 SV=1                                                                                         |
| orf_150 | CPO34771.1  | group_1679 | 169448 | 169837   | -      | COG0664 | T/CAMP-binding domain of CRP or a regulatory subunit of cAMP-dependent p        | -                                                                                                                             | -                                                                                                                                                                                           |
| orf_152 | CPO34771.1  | group_1629 | 170642 | 170899   | -      | -       | -                                                                               | -                                                                                                                             | -                                                                                                                                                                                           |
| orf_154 | CPO34771.1  | group_1829 | 172303 | 172584   | -      | -       | -                                                                               | -                                                                                                                             | -                                                                                                                                                                                           |
| orf_155 | CPO34771.1  | group_1600 | 172387 | 173276   | -      | COG0846 | O/ADP-dependent protein deacetylase, SIR2 family;Sir2;                          | -                                                                                                                             | Mitomycin resistance protein McrB OS=Streptomyces lavendulae  OX-1914 GN-mcrB PE-4 SV=1                                                                                                     |
| orf_159 | CPO34771.1  | group_1474 | 176221 | 178823   | -      | COG0546 | C/Phosphoglycerate phosphatase, HAD superfamily;Gdh;                            | -                                                                                                                             | Putative phosphoglycerate phosphatase OS=Caldivarobacter subterraneus subsp. tengcongensis (strain DSM 15242 / JCM 11107 / NBRC 100824 / MB4)  OX-273068 GN-gppAK PE-3 SV=2                 |
| orf_162 | CPO34771.1  | group_2157 | 178429 | 178878   | -      | COG1846 | K/DNA-binding transcriptional regulator, MarR family;MarR;                      | -                                                                                                                             | Uncharacterized HTH-type transcriptional regulator YnfB OS=Listeria sp. (strain 168)  OX-224308 GN-ynfB PE-4 SV=1                                                                           |
| orf_163 | CPO34771.1  | group_1990 | 178875 | 180227   | -      | COG0334 | V/Na+-driven multidrug efflux pump, Dnf/NorM/NATE family;NorM;                  | -                                                                                                                             | Multidrug export protein MepA OS=Staphylococcus haemolyticus (strain JCS4135)  OX-278908 GN-mepA PE-3 SV=1                                                                                  |
| orf_164 | CPO34771.1  | group_2138 | 180290 | 180733   | -      | COG2764 | C/ADP-dependent glyoxalase, PfmB family;PfmB;                                   | -                                                                                                                             | Protein YnfH OS=Escherichia coli (strain K12)  OX-83333 GN-ynfH PE-4 SV=1                                                                                                                   |
| orf_171 | CPO34771.1  | group_1861 | 183094 | 183142   | -      | COG0673 | R/Predicted N-acetyltransferase, GlnAT family;GlnA;                             | -                                                                                                                             | Protein YnfH OS=Escherichia coli (strain K12)  OX-83333 GN-ynfH PE-4 SV=1                                                                                                                   |
| orf_172 | CPO34771.1  | group_2120 | 183595 | 184329   | -      | COG0789 | K/DNA-binding transcriptional regulator, MarR family;MarR;                      | -                                                                                                                             | Multidrug export protein YnfH OS=Escherichia coli (strain K12)  OX-224308 GN-ynfH PE-3 SV=1                                                                                                 |
| orf_173 | CPO34771.1  | group_784  | 184410 | 185129   | -      | COG0363 | G/6-phosphogluconolactonase/Gluconamine 6-phosphate isomerase/deamina           | -                                                                                                                             | Uncharacterized protein YnfK OS=Escherichia coli (strain K12)  OX-83333 GN-ynfK PE-3 SV=1                                                                                                   |
| orf_175 | CPO34771.1  | group_701  | 186941 | 187411   | -      | COG1082 | I/tRNA ArgL AD deaminase domain;YnfH;YnfH;                                      | -                                                                                                                             | tRNA-specific deaminase YnfH OS=Listeria sp. (strain 168)  OX-224308 GN-ynfH PE-3 SV=1                                                                                                      |
| orf_176 | CPO34771.1  | group_97   | 187789 | 189195   | -      | COG1271 | C/Cytochrome bd-type quinol oxidase, subunit 1;YnfC;                            | -                                                                                                                             | Cytochrome bd ubiquinol oxidase subunit 1 OS=Listeria sp. (strain 168)  OX-224308 GN-ynfC PE-3 SV=1                                                                                         |
| orf_177 | CPO34771.1  | group_97   | 189182 | 190195   | -      | COG1294 | C/Cytochrome bd-type quinol oxidase, subunit 2;YnfC;                            | -                                                                                                                             | Cytochrome bd ubiquinol oxidase subunit 2 OS=Listeria sp. (strain 168)  OX-224308 GN-ynfC PE-3 SV=1                                                                                         |
| orf_178 | CPO34771.1  | group_1310 | 190195 | 191919   | -      | COG4988 | CO/ABC-type transport system involved in cytochrome bd biosynthesis, ATPa       | -                                                                                                                             | ATP-binding/permease protein CyoC OS=Listeria sp. (strain 168)  OX-224308 GN-ynfC PE-3 SV=1                                                                                                 |
| orf_180 | CPO34771.1  | group_1496 | 199965 | 201329   | -      | COG1455 | G/Phosphotransferase system cellobiose-specific component IIC/CelB;             | -                                                                                                                             | Cell wall permease YnfA OS=Listeria sp. (strain 168)  OX-224308 GN-ynfA PE-3 SV=1                                                                                                           |
| orf_186 | CPO34771.1  | group_1521 | 201463 | 201684   | -      | -       | -                                                                               | -                                                                                                                             | -                                                                                                                                                                                           |
| orf_189 | CPO34771.1  | group_1475 | 201887 | 202351   | -      | -       | -                                                                               | -                                                                                                                             | -                                                                                                                                                                                           |
| orf_191 | CPO34771.1  | group_1711 | 204418 | 204735   | -      | COG0718 | K/DNA-binding nucleoid-associated protein YnfB/FtsH;YnfB;                       | -                                                                                                                             | Nucleoid-associated protein YnfB OS=Listeria welshimeri serovar 6b (strain ATCC 35887 / DSM 20650 / CP 8149 / NCTC 11857 / SLCC 5334 / V8)  OX-386043 GN-ynfB OS-2654 PE-3 SV=1             |
| orf_192 | CPO34771.1  | group_1721 | 204448 | 205440   | -      | COG0553 | L/Recombinational DNA repair protein RecK;RecK;                                 | -                                                                                                                             | Recombination protein RecK OS=Listeria monocytogenes serovar 1/2a (strain ATCC BAA-679 / EGD-e)  OX-169963 GN-recK PE-3 SV=1                                                                |
| orf_193 | CPO34771.1  | group_1476 | 205455 | 205697   | -      | -       | -                                                                               | -                                                                                                                             | -                                                                                                                                                                                           |
| orf_221 | CPO34771.1  | group_2032 | 216078 | 217326   | -      | COG0561 | HK/hydroxymethylpyrimidine pyrophosphatase and other HAD family phospho-        | -                                                                                                                             | Sugar phosphatase YnfA OS=Shigella flexneri  OX-623 GN-ynfA PE-3 SV=1                                                                                                                       |
| orf_227 | CPO34771.1  | group_1646 | 240754 | 241130   | -      | COG0412 | T/Phosphatase/kinase subunit DhaM of the dihydroxyacid dehydratase DhaLM        | -                                                                                                                             | PEP-epimerase YnfA OS=Shigella flexneri  OX-623 GN-ynfA PE-3 SV=1                                                                                                                           |
| orf_238 | CPO34771.1  | group_1670 | 250790 | 251536   | -      | COG1309 | K/DNA-binding protein, AcrR family, contains nucleoid occlusion protein SmaA    | -                                                                                                                             | Uncharacterized HTH-type transcriptional regulator YnfB OS=Listeria sp. (strain 168)  OX-224308 GN-ynfB PE-4 SV=1                                                                           |
| orf_239 | CPO34771.1  | group_463  | 251908 | 254478   | +      | COG0474 | P/Magnesium-transporting ATPase (P-type);MgtA;                                  | (mgtB) MgtA transport protein (MgtB) (VF0106)                                                                                 | Magnesium-transporting ATPase, P-type 1 OS=Salmonella typhimurium (strain LT2 / SGGC412 / ATCC 700702)  OX-99287 GN-mgtB PE-1 SV=3                                                          |
| orf_242 | CPO34771.1  | group_85   | 256811 | 257113   | -      | COG1447 | G/Phosphotransferase system cellobiose-specific component IIA/CelC;             | -                                                                                                                             | Lichenan-specific phosphotransferase enzyme IIA component OS=Listeria sp. (strain 168)  OX-224308 GN-ynfA PE-3 SV=1                                                                         |
| orf_243 | CPO34771.1  | group_1442 | 262997 | 263554   | -      | COG1286 | P-K+ transport ATPase, ATPase subunit;KdpC;                                     | -                                                                                                                             | Potassium-transporting ATPase P1 OS=Listeria sp. (strain 168)  OX-224308 GN-ynfA PE-3 SV=1                                                                                                  |
| orf_248 | CPO34771.1  | group_1290 | 262997 | 263554   | -      | COG1286 | P-K+ transport ATPase, ATPase subunit;KdpC;                                     | -                                                                                                                             | Potassium-transporting ATPase P1 OS=Listeria sp. (strain 168)  OX-224308 GN-ynfA PE-3 SV=1                                                                                                  |
| orf_249 | CPO34771.1  | group_769  | 263574 | 266270   | -      | COG2025 | Tk-sensing histidine kinase KdpK/KdpB;                                          | -                                                                                                                             | Sensor protein KdpB OS=Listeria monocytogenes serovar 1/2a (strain ATCC BAA-679 / EGD-e)  OX-169963 GN-kdpB PE-3 SV=1                                                                       |
| orf_250 | CPO34771.1  | group_2100 | 266265 | 266955   | -      | COG0673 | T/Glutamate aminohydrolase/FerII-dependent fatty formamide hydrolase (F-        | -                                                                                                                             | Transcriptional regulator YnfH OS=Listeria sp. (strain 168)  OX-224308 GN-ynfH PE-3 SV=1                                                                                                    |
| orf_254 | CPO34771.1  | group_7    | 269612 | 270067   | -      | COG0698 | G/Ribose 5-phosphate isomerase RpiB/RpiB;Penicillin phosphatase;YnfC            | -                                                                                                                             | Penicillin phosphatase YnfC OS=Listeria sp. (strain 168)  OX-224308 GN-ynfC PE-3 SV=1                                                                                                       |
| orf_256 | CPO34771.1  | group_2132 | 270701 | 271513   | -      | COG4977 | K/Transcriptional regulator GlnA, contains an internal domain and an AraC-ty    | -                                                                                                                             | Uncharacterized protein YnfA OS=Listeria sp. (strain 168)  OX-224308 GN-ynfA PE-3 SV=1                                                                                                      |
| orf_258 | CPO34771.1  | group_1900 | 271918 | 272286   | -      | COG2315 | K/Predicted DNA-binding protein with double-winged structural motif, MincQ/Yj   | -                                                                                                                             | -                                                                                                                                                                                           |
| orf_259 | CPO34771.1  | group_2075 | 272363 | 273175   | -      | -       | -                                                                               | -                                                                                                                             | -                                                                                                                                                                                           |
| orf_265 | CPO34771.1  | group_324  | 278874 | 279905   | -      | COG1063 | ER/Threonine dehydrogenase or related D-dependent dehydrogenase;ThNc-           | -                                                                                                                             | -                                                                                                                                                                                           |
| orf_266 | CPO34771.1  | group_7    | 280100 | 280540   | -      | COG0698 | G/Ribose 5-phosphate isomerase RpiB/RpiB;Penicillin phosphatase;YnfC            | -                                                                                                                             | -                                                                                                                                                                                           |
| orf_267 | CPO34771.1  | group_132  | 280549 | 281233   | -      | COG0366 | G/Pentose-5-phosphate 3-epimerase;Rpe;Penicillin phosphatase pathway            | -                                                                                                                             | -                                                                                                                                                                                           |
| orf_275 | CPO34771.1  | group_1581 | 291211 | 291624   | -      | COG1082 | J/Ribosomal protein S12;RpsL;Ribosome 30S subunit                               | -                                                                                                                             | 30S ribosomal protein S12 OS=Listeria sp. (strain 168)  OX-224308 GN-rplS PE-3 SV=1                                                                                                         |
| orf_277 | CPO34771.1  | group_258  | 292191 | 294278   | -      | COG0490 | E/Translation elongation factor EF-G, a GTPase;FusA;Translation factors         | -                                                                                                                             | Elongation factor EF-G OS=Listeria monocytogenes serovar 1/2a (strain ATCC BAA-679 / EGD-e)  OX-169963 GN-fusA PE-3 SV=1                                                                    |
| orf_278 | CPO34771.1  | group_1149 | 294388 | 295575   | -      | COG0050 | I/Translation elongation factor EF-Tu, a GTPase;TufA;Translation factors        | (tufA) elongation factor Tu OS=Listeria monocytogenes serovar 1/2a (strain ATCC BAA-679 / EGD-e)  OX-169963 GN-tufA PE-3 SV=1 |                                                                                                                                                                                             |
| orf_289 | CPO34771.1  | group_165  | 304116 | 305105   | -      | COG1735 | R/Predicted metal-dependent hydrolase, phosphotransferase family;Pnp-           | -                                                                                                                             | Phosphotransferase YnfH OS=Listeria sp. (strain 168)  OX-224308 GN-ynfH PE-3 SV=1                                                                                                           |
| orf_290 | CPO34771.1  | group_1842 | 305121 | 306212   | -      | COG1402 | R/Creatine amidohydrolase/FerII-dependent fatty formamide hydrolase (F-         | -                                                                                                                             | Transcriptional regulator YnfH OS=Listeria sp. (strain 168)  OX-224308 GN-ynfH PE-3 SV=1                                                                                                    |
| orf_292 | CPO34771.1  | group_1926 | 306550 | 307293   | -      | COG4821 | R/Uncharacterized conserved protein, contains S15 (Sugar Isomerase) phospho-    | -                                                                                                                             | -                                                                                                                                                                                           |
| orf_295 | CPO34771.1  | group_1925 | 309257 | 310594   | -      | COG1409 | T/3',5'-cyclic AMP phosphodiesterase CpdA/CpdA;                                 | -                                                                                                                             | Probable cyclic nucleotide phosphodiesterase YnfC OS=Listeria sp. (strain 168)  OX-224308 GN-ynfC PE-3 SV=1                                                                                 |
| orf_297 | CPO34771.1  | group_1073 | 311676 | 312121   | -      | COG4769 | S/Uncharacterized membrane protein                                              | -                                                                                                                             | -                                                                                                                                                                                           |
| orf_298 | CPO34771.1  | group_1846 | 312254 | 312688</ |        |         |                                                                                 |                                                                                                                               |                                                                                                                                                                                             |
