# Supplementary material for: Comparative Genomics Reveal the Utilization Ability of Variable Carbohydrates as Key Genetic Features of Listeria Pathogens in Their Pathogenic Lifestyles
Source: MDPI journal article supplement (doi:10.3390/pathogens11121430), 2022-11-28
Supplement: s1 [file s1]

Table S3. Unique genes of LMO referenced to L.monocytogenes EGD-e\_160963

| ORF_id | Sequence_id | Group_id   | start  | end    | strand | COG_id  | COG_annotation                                                      | VTDB_annotation | Uniprot_annotation                                                                                                                                                                                                      |
|--------|-------------|------------|--------|--------|--------|---------|---------------------------------------------------------------------|-----------------|-------------------------------------------------------------------------------------------------------------------------------------------------------------------------------------------------------------------------|
| or_10  | ALS19B24.1  | group_1348 | 12918  | 13886  | -      | COG1577 | I-Mevalonate kinase,ERG12,Isoprenoid bio-                           |                 | Mevalonate kinase OS=Pyrococcus abyssi (strain GDS) / OX=272844 GN=pykP PE=3 Sv=1                                                                                                                                       |
| or_19  | ALS19B24.1  | group_1915 | 23132  | 23953  | -      | COG4990 | R-Predicted cysteine peptidase, C39 family,-                        |                 | Uncharacterized protein YpB OS= Bacillus subtilis (strain 168) / OX=224308 GN=yvpB PE=3 Sv=1                                                                                                                            |
| or_20  | ALS19B24.1  | group_2301 | 24194  | 24934  | -      | COG2188 | K-DNA-binding transcriptional regulator, Gr-                        |                 | Probable fructosylase utilization operon transcriptional repressor OS=Escherichia coli O157:H7 OX=83334 GN=frR PE=3 Sv=2                                                                                                |
| or_21  | ALS19B24.1  | group_2287 | 24950  | 25351  | -      | COG4893 | P-Tyrosine carboxypeptidase system, mannose/fr-                     |                 | PTS system sorbose-specific EAIIc subunit OS=Neisseria pneumoniae OX=373 GN=psrF PE=3 Sv=1                                                                                                                              |
| or_23  | ALS19B24.1  | group_2292 | 25862  | 26665  | -      | COG3715 | F-Phosphotransferase system, mannose/fr-                            |                 | N-Acetylglucosamine permease IC component 1 OS=Escherichia coli (strain K12) / OX=83333 GN=nagC PE=1 Sv=1                                                                                                               |
| or_25  | ALS19B24.1  | group_2294 | 27495  | 28199  | -      | COG4821 | R-Uncharacterized conserved protein, cont-                          |                 | UPF0309 protein Lmo0205 OS=Listeria monocytogenes serovar 1/2a (strain ATCC BAA-679 / EGD-e) / OX=169963 GN=lmo0205 PE=3 Sv=1                                                                                           |
| or_26  | ALS19B24.1  | group_2297 | 28254  | 28895  | -      | COG3142 | P-Copper homeostasis protein CusC/CuCuC-                            |                 | PF03932 family protein CusC OS=Enterococcus faecalis (strain ATCC 700802 / V583) OX=226185 GN=cusC PE=2 Sv=1                                                                                                            |
| or_28  | ALS19B24.1  | group_1836 | 31088  | 31963  | -      | COG6119 | M-Muonemyltransferase carbonoyltransferase                          |                 | Probable muonemyltransferase OS= Bacillus subtilis (strain 168) / OX=224308 GN=muM PE=2 Sv=2                                                                                                                            |
| or_52  | ALS19B24.1  | group_1808 | 54839  | 56812  | -      | COG3887 | T-Cyclic di-AMP phosphodiesterase GdpP, c-                          |                 | Cyclic-di-AMP phosphodiesterase PdeA OS=Listeria monocytogenes serotype 1/2a (strain 104035) / OX=393133 GN=pdeA PE=3 Sv=1                                                                                              |
| or_78  | ALS19B24.1  | group_33   | 82599  | 84437  | -      | -       | -                                                                   | -               | Toxin BC_0920 OS= Bacillus cereus (strain ATCC 14579 / DSM 31 / CCUG 7414 / JCM 2152 / NBRC 15305 / NCIMB 9373 / NCT 2599 / NRRL B-3711) / OX=226900 GN=BC_0920 PE=1 Sv=1                                               |
| or_85  | ALS19B24.1  | group_602  | 88888  | 94767  | -      | -       | -                                                                   | -               | -                                                                                                                                                                                                                       |
| or_87  | ALS19B24.1  | group_2206 | 97127  | 97369  | -      | COG636  | C-FoF1-type ATP synthase, membrane subu-                            |                 | ATP synthase subunit c, chloroplastic OS=Plasium sativum / OX=3888 GN=atpH PE=1 Sv=1                                                                                                                                    |
| or_94  | ALS19B24.1  | group_219  | 103204 | 103836 | -      | -       | -                                                                   | -               | -                                                                                                                                                                                                                       |
| or_107 | ALS19B24.1  | group_2220 | 116972 | 117805 | -      | COG2207 | K-AraC-type DNA-binding domain and AraC-                            |                 | HTH-type transcriptional activator RhaS OS=Escherichia fergusonii (strain ATCC 33469 / DSM 13696 / CCUG 18766 / IAM 14443 / JCM 21226 / LMIG 7866 / NBRC 102419 / NCTC 12128 / CDC 0568-73) OX=585054 GN=rhaS PE=3 Sv=1 |
| or_129 | ALS19B24.1  | group_2250 | 133951 | 134710 | -      | COG2209 | T-BAL domain, c-di-GMP-specific phosphod-                           |                 | Signaling protein YkwO OS=Escherichia coli (strain K12) / OX=224308 GN=ykwO PE=3 Sv=2                                                                                                                                   |
| or_135 | ALS19B24.1  | group_1804 | 139960 | 140853 | -      | COG1173 | E-ABC-type dipeptide/glycoprotein/peckel-                           |                 | Oligopeptide transport system permease protein AppC OS= Bacillus subtilis (strain 168) / OX=224308 GN=appC PE=3 Sv=1                                                                                                    |
| or_137 | ALS19B24.1  | group_180  | 141337 | 141705 | -      | -       | -                                                                   | -               | -                                                                                                                                                                                                                       |
| or_138 | ALS19B24.1  | group_33   | 141702 | 143006 | -      | -       | -                                                                   | -               | -                                                                                                                                                                                                                       |
| or_152 | ALS19B24.1  | group_1788 | 151839 | 152645 | -      | COG1108 | -ABC type Mo2+/Zn2+ transport system, I-                            |                 | Toxin BC_0920 OS= Bacillus cereus (strain ATCC 14579 / DSM 31 / CCUG 7414 / JCM 2152 / NBRC 15305 / NCIMB 9373 / NCT 2599 / NRRL B-3711) / OX=226900 GN=BC_0920 PE=1 Sv=1                                               |
| or_167 | ALS19B24.1  | group_170  | 168011 | 169270 | -      | COG5361 | X-Uncharacterized conserved protein;                                |                 | High-affinity zinc uptake system membrane protein ZnuB OS= Bacillus subtilis (strain 168) / OX=224308 GN=znuB PE=1 Sv=1                                                                                                 |
| or_174 | ALS19B24.1  | group_1800 | 175763 | 177760 | -      | COG1043 | J-Methionyl-tRNA synthetase,MetG;Amino-                             |                 | Methionine-tRNA ligase OS=Listeria monocytogenes serovar 1/2a (strain ATCC BAA-679 / EGD-e) / OX=169963 GN=metG PE=3 Sv=1                                                                                               |
| or_185 | ALS19B24.1  | group_1412 | 191296 | 193473 | -      | COG0300 | J165 RNA A1518 and A1519 N6 dimethyl-                               |                 | Ribosomal small subunit methyltransferase A OS=Listeria monocytogenes serovar 1/2a (strain ATCC BAA-679 / EGD-e) / OX=169963 GN=rsmA PE=3 Sv=1                                                                          |
| or_197 | ALS19B24.1  | group_2242 | 205643 | 206473 | -      | COG0664 | TzAMP-binding domain of CRP or a regulat-                           |                 | PTS system oligo-beta-mannoside-specific EAIIc component OS= Bacillus subtilis (strain 168) / OX=224308 GN=mannP PE=3 Sv=1                                                                                              |
| or_201 | ALS19B24.1  | group_2382 | 209470 | 211389 | -      | -       | (ActA) actin assembly inducing protein precursor (ActA) -Regulation |                 | Actin assembly-inducing protein YnfA OS=Listeria monocytogenes serovar 1/2a (strain ATCC BAA-679 / EGD-e) / OX=169963 GN=actA PE=1 Sv=1                                                                                 |
| or_204 | ALS19B24.1  | group_2379 | 212366 | 212689 | -      | -       | -                                                                   | -               | Uncharacterized protein Lmo0206 OS=Listeria monocytogenes serovar 1/2a (strain ATCC BAA-679 / EGD-e) / OX=169963 GN=lmo0206 PE=3 Sv=1                                                                                   |
| or_205 | ALS19B24.1  | group_2335 | 212824 | 213285 | -      | COG4808 | S-Uncharacterized protein YehH, DUf13-                              |                 | Uncharacterized lipoprotein Lmo0207 OS=Listeria monocytogenes serovar 1/2a (strain ATCC BAA-679 / EGD-e) / OX=169963 GN=lmo0207 PE=3 Sv=1                                                                               |
| or_216 | ALS19B24.1  | group_2344 | 224652 | 226508 | -      | COG634  | T-Hsp90alpha guanine prosthaphorin phospho-                         |                 | Probable hsp90alpha guanine prosthaphorin phosphatase OS= Bacillus subtilis (strain 168) / OX=224308 GN=hsp90 PE=3 Sv=1                                                                                                 |
| or_219 | ALS19B24.1  | group_772  | 229840 | 230724 | -      | COG1281 | O-RexDex-regulated molecular chaperone, H-                          |                 | 33 kDa chaperonin OS=Listeria monocytogenes serovar 1/2a (strain ATCC BAA-679 / EGD-e) / OX=169963 GN=hspD PE=3 Sv=1                                                                                                    |
| or_233 | ALS19B24.1  | group_2322 | 256491 | 256964 | -      | COG0245 | I2C-methyl-D-erythritol 2,4-cyclodiphosph-                          |                 | 2-C-methyl-D-erythritol 2,4-cyclodiphosphate synthase OS=Listeria monocytogenes serovar 1/2a (strain ATCC BAA-679 / EGD-e) / OX=169963 GN=hspF PE=3 Sv=1                                                                |
| or_237 | ALS19B24.1  | group_1649 | 260896 | 261306 | -      | COG1939 | J235 RNA maturation mini-RNAe III.MmC-                              |                 | Mini-ribonuclease 3 OS=Listeria monocytogenes serovar 1/2a (strain ATCC BAA-679 / EGD-e) / OX=169963 GN=miniR PE=3 Sv=1                                                                                                 |
| or_255 | ALS19B24.1  | group_1726 | 276728 | 280333 | -      | COG0086 | X-DNA-directed RNA polymerase, beta' sub-                           |                 | DNA-directed RNA polymerase subunit beta' OS=Listeria monocytogenes serovar 1/2a (strain ATCC BAA-679 / EGD-e) / OX=169963 GN=ppc PE=3 Sv=1                                                                             |
| or_267 | ALS19B24.1  | group_8    | 293845 | 295281 | -      | COG2723 | G-Beta-glucosidase BglG/Phi-Bacillus subtilis                       |                 | Aryl-phospho-beta-D-glucosidase BglG OS= Bacillus subtilis (strain 168) / OX=224308 GN=bglG PE=1 Sv=1                                                                                                                   |
| or_293 | ALS19B24.1  | group_2318 | 321234 | 324005 | -      | COG3711 | K-Transcriptional antitermimator,BglG;                              |                 | Probable hKAB operon regulator OS= Bacillus subtilis (strain 168) / OX=224308 GN=hK PE=1 Sv=1                                                                                                                           |
| or_296 | ALS19B24.1  | group_8    | 325729 | 327120 | -      | COG2723 | G-Beta-glucosidase/Phi-Bacillus beta-glucos-                        |                 | 6-phospho-beta-galactosidase OS=Clostridium acetobutylicum (strain ATCC 25424 / DSM 752 / JCM 1419 / LMIG 5710 / VMH B-1787) / OX=272562 GN=hacG PE=3 Sv=1                                                              |
| or_297 | ALS19B24.1  | group_2314 | 327113 | 327454 | -      | COG1447 | G-Phosphotransferase system, cellobiose/Phi-                        |                 | PTS system oligo-beta-mannoside-specific EAIIc component OS= Bacillus subtilis (strain 168) / OX=224308 GN=mannP PE=3 Sv=1                                                                                              |
| or_301 | ALS19B24.1  | group_2244 | 329923 | 330999 | -      | COG2008 | E-Threonine aldolase,GLY1;                                          |                 | Low-specificity L-threonine aldolase 1 OS=Arabidopsis thaliana OX=3702 GN=TLA1 PE=1 Sv=1                                                                                                                                |
| or_311 | ALS19B24.1  | group_2027 | 340278 | 340952 | -      | COG0819 | H-Aminopyrimidine aminohydrolase TenA (-                            |                 | Aminopyrimidine aminohydrolase OS= Bacillus subtilis (strain 168) / OX=224308 GN=tenA PE=1 Sv=1                                                                                                                         |
| or_312 | ALS19B24.1  | group_2115 | 340945 | 341754 | -      | COG2145 | E-Hydroxyphenylhydrolase YnfH (-) sugar kinase                      |                 | Mannosylglycerate hydrolase OS=Escherichia coli (strain K12) / OX=83333 GN=hmg PE=1 Sv=2                                                                                                                                |
| or_314 | ALS19B24.1  | group_2226 | 342551 | 343195 | -      | COG3352 | H-Thiamine monophosphate synthase,THE-                              |                 | Thiamine-phosphate synthase OS=Listeria monocytogenes serovar 1/2a (strain ATCC BAA-679 / EGD-e) / OX=169963 GN=hmg PE=3 Sv=1                                                                                           |
| or_317 | ALS19B24.1  | group_2249 | 346377 | 347036 | -      | -       | -                                                                   | -               | -                                                                                                                                                                                                                       |
| or_321 | ALS19B24.1  | group_23   | 349326 | 350228 | -      | -       | -                                                                   | -               | HTH-type transcriptional regulator rgg OS=Streptococcus gordonii (strain Challis / ATCC 35105 / BCR 15272 / CH1 / DLI / V288) / OX=467705 GN=rgg PE=4 Sv=1                                                              |
| or_336 | ALS19B24.1  | group_2334 | 370445 | 370534 | -      | -       | -                                                                   | -               | -                                                                                                                                                                                                                       |
| or_340 | ALS19B24.1  | group_2243 | 373832 | 374596 | -      | COG1028 | I-NAD(P)-dependent dehydrogenase, short-                            |                 | NAD-dependent glycerol dehydrogenase OS=Listeria innocua serovar 6a (strain ATCC BAA-680 / CLIP 11262) / OX=272626 GN=goD PE=1 Sv=1                                                                                     |
| or_341 | ALS19B24.1  | group_2295 | 374621 | 375067 | -      | COG0698 | G-Ribose 5-phosphate isomerase RpiB/RpiB-                           |                 | Ribose-5-P isomerase B OS=Listeria innocua serovar 6a (strain ATCC BAA-680 / CLIP 11262) / OX=272626 GN=rpiB PE=1 Sv=1                                                                                                  |
| or_343 | ALS19B24.1  | group_2299 | 375842 | 376492 | -      | COG376  | G-Dihydroxyacetone kinase,DAK3;Isopreno-                            |                 | PF-dependent dihydroxyacetone kinase 2, ADP-binding subunit DhaL OS=Listeria innocua serovar 6a (strain ATCC BAA-680 / CLIP 11262) / OX=272626 GN=dhaL PE=2 Sv=1                                                        |
| or_345 | ALS19B24.1  | group_2302 | 377631 | 377872 | -      | COG0599 | R-Uncharacterized conserved protein YnfZ,-                          |                 | Putative glycerol transporter Lmo067 OS=Listeria innocua serovar 6a (strain ATCC BAA-680 / CLIP 11262) / OX=272626 GN=lmo067 PE=2 Sv=1                                                                                  |
| or_346 | ALS19B24.1  | group_2293 | 377888 | 378319 | -      | -       | -                                                                   | -               | Putative glycerol transporter Lmo068 OS=Listeria innocua serovar 6a (strain ATCC BAA-680 / CLIP 11262) / OX=272626 GN=lmo068 PE=2 Sv=1                                                                                  |
| or_347 | ALS19B24.1  | group_2300 | 378404 | 378781 | -      | COG3412 | T-Phosphotransferase subunit DhaM of the-                           |                 | Putative dihydroxyacetone kinase 2, phosphoryl donor subunit DhaM OS=Listeria innocua serovar 6a (strain ATCC BAA-680 / CLIP 11262) / OX=272626 GN=dhaM2 PE=1 Sv=1                                                      |
| or_348 | ALS19B24.1  | group_2217 | 378964 | 379728 | -      | COG1349 | K-GNA-binding transcriptional regulator o-                          |                 | HTH-type transcriptional regulator GmrR OS=Listeria innocua serovar 6a (strain ATCC BAA-680 / CLIP 11262) / OX=272626 GN=gmrR PE=4 Sv=1                                                                                 |
| or_349 | ALS19B24.1  | group_2353 | 379794 | 380027 | -      | COG0456 | J-Ribosomal protein S18 acetylase RlmA and                          |                 | Uncharacterized N-acetyltransferase ynfJ2 OS=Neisseria meningitidis OX=2788 GN=ynfJ2 PE=2 Sv=1                                                                                                                          |
| or_386 | ALS19B24.1  | group_2214 | 412457 | 412825 | -      | -       | -                                                                   | -               | -                                                                                                                                                                                                                       |
| or_396 | ALS19B24.1  | group_2341 | 419544 | 420002 | -      | COG1762 | GT-Phosphotransferase system, mannitol/fr-                          |                 | PTS system 2-O-alpha-mannosyl-D-glycerate-specific EIIBC component OS=Escherichia coli (strain K12) / OX=83333 GN=hmgA PE=1 Sv=1                                                                                        |
| or_398 | ALS19B24.1  | group_26   | 420335 | 421447 | -      | COG1299 | G-Phosphotransferase system, fructose/sp-                           |                 | PTS system fructose-specific EIIBC component OS=Vibrio cholerae serotype O1 (strain ATCC 39315 / El Tor Inaba 16966) / OX=243277 GN=fruA PE=2 Sv=1                                                                      |
| or_399 | ALS19B24.1  | group_22   | 421460 | 424206 | -      | COG0383 | E-Alpha-mannosidase,MngB;                                           |                 | Probable alpha-mannosidase OS=Escherichia coli (strain K12) / OX=83333 GN=hmg PE=1 Sv=2                                                                                                                                 |
| or_403 | ALS19B24.1  | group_904  | 427104 | 428111 | -      | COG3036 | P-Phosphate/sulfate permease,PIA;                                   |                 | Probable low-affinity inorganic phosphate transporter OS= Bacillus subtilis (strain 168) / OX=224308 GN=piP PE=3 Sv=2                                                                                                   |
| or_423 | ALS19B24.1  | group_2288 | 445049 | 447010 | -      | COG3711 | K-Transcriptional antitermimator,BglG;                              |                 | Probable hKAB operon regulator OS= Bacillus subtilis (strain 168) / OX=224308 GN=hK PE=1 Sv=1                                                                                                                           |
| or_426 | ALS19B24.1  | group_26   | 447804 | 448010 | -      | COG1299 | G-Phosphotransferase system, fructose/sp-                           |                 | PTS system fructose-specific EIIBC component OS=Rhodococcus capsulatus OX=1261 GN=fruA PE=3 Sv=1                                                                                                                        |
| or_427 | ALS19B24.1  | group_22   | 448956 | 451508 | -      | COG0383 | E-Alpha-mannosidase,MngB;                                           |                 | Mannosylglycerate hydrolase OS=Escherichia coli (strain K12) / OX=83333 GN=hmgB PE=1 Sv=2                                                                                                                               |
| or_435 | ALS19B24.1  | group_2257 | 466517 | 467362 | -      | COG7002 | R-Uncharacterized conserved protein YnfJ,-                          |                 | Quinone oxidoreductase 2 OS=Escherichia coli (strain K12) / OX=83333 GN=qrnB PE=1 Sv=1                                                                                                                                  |
| or_440 | ALS19B24.1  | group_2077 | 472330 | 472644 | -      | -       | -                                                                   | -               | -                                                                                                                                                                                                                       |
| or_442 | ALS19B24.1  | group_2352 | 473936 | 476716 | -      | COG1511 | S-Uncharacterized membrane protein YnfH,-                           |                 | Uncharacterized protein YnfH OS= Bacillus subtilis (strain 168) / OX=224308 GN=ynfH PE=4 Sv=2                                                                                                                           |
| or_449 | ALS19B24.1  | group_2352 | 483934 | 484599 | -      | COG3619 | S-Uncharacterized membrane protein YnfK,-                           |                 | UPF0700 transmembrane protein YnfK OS= Bacillus subtilis (strain 168) / OX=224308 GN=ynfK PE=3 Sv=1                                                                                                                     |
| or_450 | ALS19B24.1  | group_2343 | 484620 | 485375 | -      | -       | -                                                                   | -               | -                                                                                                                                                                                                                       |
| or_456 | ALS19B24.1  | group_2222 | 492918 | 494018 | -      | COG3535 | S-Uncharacterized conserved protein, DUf1-                          |                 | Uncharacterized protein YnfM OS= Bacillus subtilis (strain 168) / OX=224308 GN=ynfM PE=3 Sv=1                                                                                                                           |
| or_457 | ALS19B24.1  | group_1395 | 494011 | 495561 | -      | COG0145 | E-DNA-methyltransferase XosA/xosA/methyl-                           |                 | Putative D-/L-hydantoinase subunit A OS=Pseudomonas sp. (strain K5671) / OX=29441 GN=hyuA PE=3 Sv=1                                                                                                                     |
| or_463 | ALS19B24.1  | group_19   | 501693 | 501959 | -      | COG2963 | X-Transposase InsE and inactivated derivat-                         |                 | -                                                                                                                                                                                                                       |
| or_480 | ALS19B24.1  | group_2235 | 516076 | 516636 | -      | COG1309 | K-DNA-binding protein, AcrR family, includ-                         |                 | HTH-type dhaKLM operon transcriptional activator DhaS OS=Lactococcus lactis subsp. lactis (strain IL14003) / OX=272623 GN=dhaS PE=1 Sv=1                                                                                |
| or_481 | ALS19B24.1  | group_1802 | 517646 | 518446 | -      | COG1763 | S-Myo-inositol cross-reactive antigen (function U-                  |                 | Oleate hydratase OS=Elaeobacter kriegia meningoseptica OX=238 GN=hyaA PE=1 Sv=1                                                                                                                                         |
| or_495 | ALS19B24.1  | group_2346 | 531294 | 532233 | -      | COG0697 | E-RibP permease of the drp12 transporter                            |                 | Putative drp12 transporter YnfM OS= Bacillus subtilis (strain 168) / OX=224308 GN=ynfM PE=3 Sv=1                                                                                                                        |
| or_506 | ALS19B24.1  | group_133  | 534021 | 534167 | -      | COG0166 | ER-Threonine dehydrogenase or related Zn-                           |                 | Galactol 1-phosphatase 5 OS=Escherichia coli (strain K12) / OX=83333 GN=gatD PE=1 Sv=1                                                                                                                                  |
| or_511 | ALS19B24.1  | group_1745 | 545609 | 546289 | -      | COG0518 | F-GMP synthase, glutamine amidotransfer-                            |                 | Putative glutamine amidotransferase-like protein YnfE OS=Salmonella typhimurium (strain LT / SGSC1412 / ATCC 700702) / OX=99287 GN=ynfE PE=3 Sv=2                                                                       |
| or_516 | ALS19B24.1  | group_2363 | 549916 | 551346 | -      | COG2843 | M-Poly gamma glutamate biosynthesis pro-                            |                 | Capsule biosynthesis protein CapA OS= Bacillus anthracis OX=1392 GN=capA PE=2 Sv=2                                                                                                                                      |
| or_525 | ALS19B24.1  | group_170  | 560443 | 561174 | -      | COG0361 | X-Uncharacterized conserved protein;                                |                 | -                                                                                                                                                                                                                       |
| or_528 | ALS19B24.1  | group_2225 | 564257 | 565753 | -      | COG2598 | R-Predicted metal-dependent carbohydrate-                           |                 | -                                                                                                                                                                                                                       |
| or_529 | ALS19B24.1  | group_2221 | 565764 | 567014 | -      | COG1215 | N-Glycosyltransferase, catalytic subunit of (-                      |                 | Uncharacterized glycosyltransferase YnfM OS= Bacillus subtilis (strain 168) / OX=224308 GN=ynfM PE=3 Sv=1                                                                                                               |
| or_530 | ALS19B24.1  | group_2128 | 567030 | 569081 | -      | -       | -                                                                   | -               | Uncharacterized protein YnfN OS= Bacillus subtilis (strain 168) / OX=224308 GN=ynfN PE=3 Sv=1                                                                                                                           |
| or_531 | ALS19B24.1  | group_2218 | 569094 | 569948 | -      | COG2199 | T-TGGDEF domain, diguanylate cyclase (c-di-                         |                 | ATP phosphoribosyltransferase OS=Listeria monocytogenes serovar 1/2a (strain ATCC BAA-679 / EGD-e) / OX=169963 GN=hmg PE=3 Sv=1                                                                                         |
| or_558 | ALS19B24.1  | group_1667 | 605401 | 606042 | -      | COG0040 | E-ATP phosphoribosyltransferase,HistH;Hist-                         |                 | Homoserine O-acetyltransferase OS=Listeria monocytogenes serovar 1/2a (strain ATCC BAA-679 / EGD-e) / OX=169963 GN=hmgA PE=3 Sv=1                                                                                       |
| or_594 | ALS19B24.1  | group_1783 | 635317 | 636423 | -      | COG0021 | E-Homoserine O-acetyltransferase,METZ-M-                            |                 | -                                                                                                                                                                                                                       |
| or_597 | ALS19B24.1  | group_2305 | 638781 | 639482 | -      | COG0664 | TzAMP-binding domain of CRP or a regulat-                           |                 | -                                                                                                                                                                                                                       |
| or_627 | ALS19B24.1  | group_2320 | 664242 | 668990 | -      | -       | -                                                                   | -               | Collagen adhesin OS=Staphylococcus aureus OX=1280 GN=cna PE=1 Sv=1                                                                                                                                                      |
| or_628 | ALS19B24.1  | group_2324 | 669086 | 669361 | -      | -       | -                                                                   | -               | -                                                                                                                                                                                                                       |
| or_629 | ALS19B24.1  | group_2254 | 669623 | 669950 | -      | COG1335 | HR-Nicotinamidase-related amidase,PhnA/F-                           |                 | Uncharacterized isochromanase family protein HVO_2328 OS=Halobacter volcanii (strain ATCC 29605 / DSM 3757 / JCM 8879 / NBRC 14742 / NCIMB 2012 / VKM B-1768 / DS2) / OX=309890 GN=HVO_2328 PE=1 Sv=1                   |
| or_635 | ALS19B24.1  | group_2319 | 670876 | 671855 | -      | COG1299 | G-Phosphotransferase system, fructose/sp-                           |                 | Fructose-1,6-bisphosphate lyase component 1 OS=Escherichia coli (strain K12) / OX=83333 GN=hmg PE=3 Sv=1                                                                                                                |
| or_660 | ALS19B24.1  | group_2344 | 698785 | 699420 | -      | COG2231 | L3-Methyladenine DNA glycosylase, HHM-C-                            |                 | Putative DNA repair glycosylase MJI34.8 OS=Methanocaldococcus jannaschii (strain ATCC 43007 / DSM 2661 / JAL-1 / JCM 10045 / NBRC 100440) / OX=243232 GN=MJI34.8 PE=1 Sv=1                                              |
| or_661 | ALS19B24.1  | group_23   | 699410 | 700306 | -      | -       | -                                                                   | -               | HTH-type transcriptional regulator rgg OS=Streptococcus gordonii (strain Challis / ATCC 35105 / BCR 15272 / CH                                                                                                          |
