# Supplementary material for: Comparative Genomics Reveal the Utilization Ability of Variable Carbohydrates as Key Genetic Features of Listeria Pathogens in Their Pathogenic Lifestyles
Source: MDPI journal article supplement (doi:10.3390/pathogens11121430), 2022-11-28
Supplement: s1 [file s1]

Table S1. Genomic details of *Listeria* strains used in the present study.

| Sample_accession | species        | Organism                                         | Accession_number | Genome_size(bp) | GC content(%) | # of scaffold | # of plasmid | CDS   | rRNA | tRNA | geographic_location | collection_date | isolation_source                 | host         |
|------------------|----------------|--------------------------------------------------|------------------|-----------------|---------------|---------------|--------------|-------|------|------|---------------------|-----------------|----------------------------------|--------------|
| SAMAE3138260     | Lweshimeri     | Lweshimeri_serovar_6b_str_SLCC5334_386043        | AM263198.1       | 2,814,130       | 36.35         | 1             | 0            | 2,781 | 18   | 66   | NA                  | NA              | NA                               | NA           |
| SAMAE4534872     | Lweshimeri     | Lweshimeri_1643                                  | LT906444.1       | 2,814,137       | 36.35         | 1             | 0            | 2,778 | 18   | 66   | USA                 | 1900            | Decaying vegetation              | Food         |
| SAMAE2275815     | Lseeligeri     | Lseeligeri_serovar_1_2b_str_SLCC2854_683837      | FN537480.1       | 2,797,636       | 37.38         | 1             | 0            | 2,688 | 18   | 67   | NA                  | NA              | NA                               | NA           |
| SAMN01909079     | Lseeligeri     | Lseeligeri_FSL_54_171_702452                     | CM001055.1       | 2,979,339       | 35.17         | 1             | 0            | 2,523 | 17   | 24   | USA                 | 2001            | urban Environment                | Environment  |
| SAMN01909078     | Lseeligeri     | Lseeligeri_FSL_N1_067_702453                     | CM001051.1       | 3,140,155       | 35.48         | 1             | 0            | 2,779 | 2    | 25   | USA                 | NA              | Food processing plant            | Environment  |
| SAMN16409656     | Lseeligeri     | Lseeligeri_1640_str1                             | P063071.1        | 2,927,941       | 37.32         | 1             | 1            | 2,846 | 18   | 67   | Poland              | 2017            | soil sample from dry pine forest | Environment  |
| SAMN10662805     | Lseeligeri     | Lseeligeri_1640                                  | P034772.1        | 2,872,774       | 37.3          | 1             | 0            | 2,834 | 8    | 63   | NA                  | 2018            | NA                               | NA           |
| SAMN02743817     | Lmonocytogenes | Lmonocytogenes_WSLC1042_1457188                  | CP007210.1       | 2,942,168       | 37.99         | 1             | 0            | 2,857 | 18   | 67   | Germany             | NA              | NA                               | NA           |
| SAMN02743815     | Lmonocytogenes | Lmonocytogenes_WSLC11001_1457187                 | CP007160.1       | 2,951,235       | 37.96         | 1             | 0            | 2,912 | 18   | 67   | Germany             | NA              | NA                               | NA           |
| SAMAE2272571     | Lmonocytogenes | Lmonocytogenes_SLCC179_879090                    | FR733650.1       | 2,882,234       | 38.04         | 1             | 1            | 2,818 | 18   | 68   | NA                  | NA              | NA                               | NA           |
| SAMAE2272672     | Lmonocytogenes | Lmonocytogenes_SLCC5850_882096                   | FR733647.1       | 2,907,142       | 38.01         | 1             | 0            | 2,852 | 18   | 67   | NA                  | NA              | NA                               | NA           |
| SAMAE2271969     | Lmonocytogenes | Lmonocytogenes_SLCC2755_932919                   | FR733646.1       | 3,023,926       | 38.04         | 1             | 1            | 2,916 | 18   | 67   | NA                  | NA              | NA                               | NA           |
| SAMAE2272785     | Lmonocytogenes | Lmonocytogenes_SLCC2540_879089                   | FR733645.1       | 2,976,958       | 37.93         | 1             | 0            | 2,879 | 18   | 67   | NA                  | NA              | NA                               | NA           |
| SAMAE2272506     | Lmonocytogenes | Lmonocytogenes_SLCC2479_882020                   | FR733649.1       | 2,972,172       | 37.95         | 1             | 0            | 2,924 | 18   | 65   | NA                  | NA              | NA                               | NA           |
| SAMAE2272689     | Lmonocytogenes | Lmonocytogenes_SLCC2378_879088                   | FR733644.1       | 2,941,360       | 37.99         | 1             | 0            | 2,845 | 18   | 67   | NA                  | NA              | NA                               | NA           |
| SAMAE2272177     | Lmonocytogenes | Lmonocytogenes_SLCC2376_882097                   | FR733651.1       | 2,840,185       | 38.26         | 1             | 0            | 2,733 | 18   | 67   | NA                  | NA              | NA                               | NA           |
| SAMAE2272627     | Lmonocytogenes | Lmonocytogenes_SLCC2372_932920                   | FR733648.1       | 3,022,910       | 37.91         | 1             | 1            | 2,980 | 18   | 67   | NA                  | NA              | NA                               | NA           |
| SAMAE2272544     | Lmonocytogenes | Lmonocytogenes_serotype_4b_str_IL195_1230340     | HF558398.1       | 2,904,662       | 38.04         | 1             | 0            | 2,808 | 18   | 67   | NA                  | NA              | NA                               | NA           |
| SAMN01816209     | Lmonocytogenes | Lmonocytogenes_serotype_4b_str_US0087_1134669    | P044429.1        | 2,843,285       | 37.95         | 1             | 0            | 2,804 | 15   | 66   | USA                 | 2011            | Environment swab                 | Environment  |
| SAMN02603980     | Lmonocytogenes | Lmonocytogenes_serotype_4b_str_F2365_265669      | AE017262.2       | 2,905,187       | 38.04         | 1             | 0            | 2,808 | 18   | 67   | NA                  | NA              | NA                               | NA           |
| SAMAE2272134     | Lmonocytogenes | Lmonocytogenes_serotype_4b_str_CLIP_80459_568819 | FM242711.1       | 2,912,690       | 38.06         | 1             | 0            | 2,802 | 18   | 67   | NA                  | NA              | NA                               | NA           |
| SAMN07711116     | Lmonocytogenes | Lmonocytogenes_serotype_4b_str_81_0861_1196161   | CP004871.1       | 2,974,403       | 37.96         | 1             | 0            | 2,912 | 15   | 58   | Canada              | 1981            | Food                             | Food         |
| SAMN07713778     | Lmonocytogenes | Lmonocytogenes_serotype_4b_str_81_0592_1196160   | CP007526.1       | 2,975,864       | 37.96         | 1             | 0            | 2,905 | 15   | 58   | Canada              | 1981            | fetal blood                      | Homo sapiens |
| SAMN07713777     | Lmonocytogenes | Lmonocytogenes_serotype_4b_str_81_0558_1196159   | CP007525.1       | 2,971,543       | 37.96         | 1             | 0            | 2,901 | 15   | 58   | Canada              | 1981            | CSF                              | Homo sapiens |
| SAMN07714730     | Lmonocytogenes | Lmonocytogenes_serotype_4b_str_10_0809_1196162   | CP007167.1       | 2,975,853       | 37.96         | 1             | 0            | 2,906 | 15   | 58   | Canada              | 1981            | stool                            | Homo sapiens |
| SAMN07714742     | Lmonocytogenes | Lmonocytogenes_serotype_4b_str_02_6680_1196175   | CP007462.1       | 2,908,004       | 38            | 1             | 0            | 2,813 | 15   | 58   | Canada              | 2002            | cheese                           | Environment  |
| SAMN02944848     | Lmonocytogenes | Lmonocytogenes_serotype_4b_str_02_6679_1196174   | CP008821.1       | 2,908,004       | 38            | 1             | 0            | 2,813 | 15   | 58   | Canada              | 2002            | stool                            | Homo sapiens |
| SAMN07714741     | Lmonocytogenes | Lmonocytogenes_serotype_4b_str_02_1792_1196173   | CP007461.1       | 2,979,105       | 37.95         | 1             | 0            | 2,908 | 15   | 58   | Canada              | 2002            | cheese                           | Environment  |
| SAMN07714740     | Lmonocytogenes | Lmonocytogenes_serotype_4b_str_02_1289_1196172   | CP007460.1       | 2,979,105       | 37.95         | 1             | 0            | 2,910 | 15   | 58   | Canada              | 2002            | stool                            | Homo sapiens |
| SAMN07714739     | Lmonocytogenes | Lmonocytogenes_serotype_4b_str_02_1103_1196171   | CP007459.1       | 2,979,105       | 37.95         | 1             | 0            | 2,910 | 15   | 58   | Canada              | 2002            | CSF                              | Homo sapiens |
| SAMN07714755     | Lmonocytogenes | Lmonocytogenes_serotype_3c_str_10_5027_1196195   | CP007196.1       | 2,965,327       | 37.94         | 1             | 0            | 2,931 | 15   | 58   | Canada              | 2009            | food processing                  | Environment  |
| SAMN07714754     | Lmonocytogenes | Lmonocytogenes_serotype_1_2c_str_10_5026_1196194 | CP007195.1       | 2,967,496       | 37.94         | 1             | 0            | 2,927 | 15   | 58   | Canada              | 2009            | food processing                  | Environment  |
| SAMN07714753     | Lmonocytogenes | Lmonocytogenes_serotype_1_2c_str_10_5025_1196193 | CP007194.1       | 2,967,523       | 37.94         | 1             | 0            | 2,927 | 15   | 58   | Canada              | 2009            | bacon flakes                     | Environment  |
| SAMN07714752     | Lmonocytogenes | Lmonocytogenes_serotype_1_2b_str_10_0811_1196164 | CP007193.1       | 3,017,344       | 37.96         | 1             | 0            | 2,968 | 15   | 58   | Canada              | 1996            | imitation crab                   | Environment  |
| SAMN07714751     | Lmonocytogenes | Lmonocytogenes_serotype_1_2b_str_10_0810_1196163 | CP007192.1       | 3,017,344       | 37.96         | 1             | 0            | 2,968 | 15   | 58   | Canada              | 1996            | stool                            | Homo sapiens |
| SAMN07714745     | Lmonocytogenes | Lmonocytogenes_serotype_1_2a_str_99_6370_1196179 | CP007021.1       | 3,032,209       | 37.96         | 1             | 0            | 3,006 | 15   | 58   | Canada              | 1999            | blood                            | Homo sapiens |
| SAMN07714744     | Lmonocytogenes | Lmonocytogenes_serotype_1_2a_str_98_2035_1196178 | CP007020.1       | 3,032,209       | 37.96         | 1             | 0            | 3,006 | 15   | 58   | Canada              | 1998            | blood                            | Homo sapiens |
| SAMN07714743     | Lmonocytogenes | Lmonocytogenes_serotype_1_2a_str_95_0093_1196177 | CP007019.1       | 3,000,273       | 37.96         | 1             | 0            | 2,960 | 15   | 58   | Canada              | 1995            | blood                            | Homo sapiens |
| SAMN07711118     | Lmonocytogenes | Lmonocytogenes_serotype_1_2a_str_88_0478_1196176 | CP006862.1       | 2,994,351       | 37.97         | 1             | 0            | 2,957 | 15   | 58   | Canada              | 1988            | blood                            | Homo sapiens |
| SAMN02752309     | Lmonocytogenes | Lmonocytogenes_serotype_1_2a_str_10_5024_1196192 | CP008827.1       | 2,999,326       | 37.97         | 1             | 0            | 2,959 | 15   | 58   | Canada              | 2010            | food                             | Food         |
| SAMN07714736     | Lmonocytogenes | Lmonocytogenes_serotype_1_2a_str_10_4758_1196168 | CP007198.1       | 2,910,921       | 37.98         | 1             | 0            | 2,853 | 15   | 58   | Canada              | 2002            | cheese                           | Environment  |
| SAMN07714735     | Lmonocytogenes | Lmonocytogenes_serotype_1_2a_str_10_4754_1196167 | CP007197.1       | 2,910,922       | 37.98         | 1             | 0            | 2,852 | 15   | 58   | Canada              | 2002            | CSF                              | Homo sapiens |
| SAMN07714752     | Lmonocytogenes | Lmonocytogenes_serotype_1_2a_str_10_1321_1196191 | CP007018.1       | 2,999,326       | 37.97         | 1             | 0            | 2,959 | 15   | 58   | Canada              | 2010            | blood                            | Homo sapiens |
| SAMN07711119     | Lmonocytogenes | Lmonocytogenes_serotype_1_2a_str_10_1047_1196190 | CP006861.1       | 2,998,206       | 37.97         | 1             | 0            | 2,956 | 15   | 58   | Canada              | 2010            | CSF                              | Homo sapiens |
| SAMN07714751     | Lmonocytogenes | Lmonocytogenes_serotype_1_2a_str_10_1046_1196189 | CP007017.1       | 2,998,206       | 37.97         | 1             | 0            | 2,956 | 15   | 58   | Canada              | 2010            | blood                            | Homo sapiens |
| SAMN07714738     | Lmonocytogenes | Lmonocytogenes_serotype_1_2a_str_10_0934_1196170 | CP007016.1       | 2,870,277       | 38.02         | 1             | 0            | 2,785 | 15   | 58   | Canada              | 2008            | cheese                           | Environment  |
| SAMN07714737     | Lmonocytogenes | Lmonocytogenes_serotype_1_2a_str_10_0933_1196169 | CP007199.1       | 2,870,277       | 38.02         | 1             | 0            | 2,785 | 15   | 58   | Canada              | 2008            | blood                            | Homo sapiens |
| SAMN05771120     | Lmonocytogenes | Lmonocytogenes_serotype_1_2a_str_10_0815_1196188 | CP006860.1       | 3,032,624       | 37.96         | 1             | 0            | 3,005 | 15   | 58   | Canada              | 2008            | meat                             | Meat         |
| SAMN02873948     | Lmonocytogenes | Lmonocytogenes_serotype_1_2a_str_10_0814_1196187 | CP008836.1       | 2,999,305       | 37.97         | 1             | 0            | 2,960 | 15   | 58   | Canada              | 2010            | meat                             | Meat         |
| SAMN07714734     | Lmonocytogenes | Lmonocytogenes_serotype_1_2a_str_10_0813_1196166 | CP007171.1       | 2,942,234       | 37.96         | 1             | 0            | 2,895 | 15   | 58   | Canada              | 2000            | blood                            | Homo sapiens |
| SAMN07714733     | Lmonocytogenes | Lmonocytogenes_serotype_1_2a_str_10_0812_1196165 | CP007170.1       | 2,942,234       | 37.96         | 1             | 0            | 2,895 | 15   | 58   | Canada              | 2000            | Whipping cream                   | Environment  |
| SAMN07714750     | Lmonocytogenes | Lmonocytogenes_serotype_1_2a_str_08_7669_1196186 | CP007011.1       | 2,954,577       | 38.01         | 1             | 0            | 2,893 | 15   | 58   | Canada              | 2008            | blood                            | Homo sapiens |
| SAMN07714749     | Lmonocytogenes | Lmonocytogenes_serotype_1_2a_str_08_7374_1196185 | CP007010.1       | 2,999,326       | 37.97         | 1             | 0            | 2,959 | 15   | 58   | Canada              | 2008            | meat                             | Environment  |
| SAMN05771121     | Lmonocytogenes | Lmonocytogenes_serotype_1_2a_str_08_6997_1196184 | CP006859.1       | 3,032,624       | 37.96         | 1             | 0            | 3,005 | 15   | 58   | Canada              | 2008            | blood                            | Homo sapiens |
| SAMN05771122     | Lmonocytogenes | Lmonocytogenes_serotype_1_2a_str_08_6569_1196183 | CP006858.1       | 3,032,624       | 37.96         | 1             | 0            | 3,005 | 15   | 58   | Canada              | 2008            | food processing                  | Environment  |
| SAMN07714748     | Lmonocytogenes | Lmonocytogenes_serotype_1_2a_str_08_6056_1196182 | CP007009.1       | 3,032,624       | 37.96         | 1             | 0            | 3,005 | 15   | 58   | Canada              | 2008            | turkey meat                      | Environment  |
| SAMN07714747     | Lmonocytogenes | Lmonocytogenes_serotype_1_2a_str_04_5457_1196181 | CP007008.1       | 2,999,326       | 37.97         | 1             | 0            | 2,959 | 15   | 58   | Canada              | 2004            | blood                            | Homo sapiens |
| SAMN07714746     | Lmonocytogenes | Lmonocytogenes_serotype_1_2a_str_02_5993_1196180 | CP007007.1       | 2,999,326       | 37.97         | 1             | 0            | 2,960 | 15   | 58   | Canada              | 2002            | blood                            | Homo sapiens |
| SAMAE3138991     | Lmonocytogenes | Lmonocytogenes_R479a_1437838                     | HG813247.1       | 3,031,650       | 37.91         | 1             | 1            | 2,984 | 15   | 58   | NA                  | NA              | NA                               | NA           |
| SAMAE2271966     | Lmonocytogenes | Lmonocytogenes_N53_1_1234142                     | HE999705.1       | 2,776,847       | 38.1          | 1             | 0            | 3,323 | 18   | 67   | NA                  | NA              | NA                               | NA           |
| SAMN02604342     | Lmonocytogenes | Lmonocytogenes_M7_1030009                        | CP002816.1       | 2,976,163       | 38.19         | 1             | 0            | 2,959 | 18   | 67   | NA                  | NA              | NA                               | NA           |
| SAMAE16205177    | Lmonocytogenes | Lmonocytogenes_L028_393132                       | CP006184.1       | 2,975,254       | 37.96         | 1             | 0            | 2,933 | 18   | 67   | Netherlands         | 2004            | feces of a pregnant carrier      | Homo sapiens |
| SAMAE2272406     | Lmonocytogenes | Lmonocytogenes_199_563174                        | FM211688.1       | 2,979,198       | 38.19         | 1             | 0            | 2,954 | 18   | 67   | NA                  | NA              | NA                               | NA           |
| SAMAE2272305     | Lmonocytogenes | Lmonocytogenes_1312_882094                       | FR733642.2       | 2,973,642       | 38.06         | 1             | 0            | 2,902 | 18   | 67   | NA                  | NA              | NA                               | NA           |
| SAMN01813900     | Lmonocytogenes | Lmonocytogenes_1816_930781                       | CP006047.2       | 2,947,460       | 37.97         | 1             | 0            | 2,956 | 15   | 58   | USA                 | NA              | NA                               | NA           |
| SAMN01816124     | Lmonocytogenes | Lmonocytogenes_J1_220_930782                     | CP006046.4       | 3,032,269       | 37.94         | 1             | 0            | 2,977 | 18   | 67   | USA                 | NA              | NA                               | NA           |
| SAMN00769971     | Lmonocytogenes | Lmonocytogenes_J0161_393130                      | CP002001.1       | 3,000,464       | 37.86         | 1             | 0            | 2,947 | 15   | 59   | NA                  | NA              | NA                               | NA           |
| SAMN02603154     | Lmonocytogenes | Lmonocytogenes_HCC23_552536                      | CP001175.1       | 2,976,212       | 38.19         | 1             | 0            | 2,961 | 18   | 67   | NA                  | NA              | NA                               | NA           |
| SAMN00133119     | Lmonocytogenes | Lmonocytogenes_FSL_R2_561_393126                 | CP002003.1       | 2,973,801       | 37.96         | 1             | 0            | 2,939 | 18   | 67   | NA                  | NA              | NA                               | NA           |
| SAMN0231353      | Lmonocytogenes | Lmonocytogenes_FSL_J1_208_393119                 | CP002171.1       | 2,859,299       | 37.99         | 1             | 0            | 2,859 | 18   | 67   | USA                 | 1999            | Goat                             | Goat         |
| SAMN16231352     | Lmonocytogenes | Lmonocytogenes_FSL_J1_175_393118                 | CP002129.1       | 2,957,228       | 38.01         | 1             | 0            | 2,860 | 18   | 67   | NA                  | NA              | water                            | Environment  |
| SAMN0012880      | Lmonocytogenes | Lmonocytogenes_Finland_1998_393127               | CP002004.1       | 2,874,431       | 38.05         | 1             | 0            | 2,786 | 18   | 67   | NA                  | NA              | NA                               | NA           |
| SAMN07763702     | Lmonocytogenes | Lmonocytogenes_EGD_e_169963_str1                 | CP023861.1       | 2,944,523       | 37.98         | 1             | 0            | 2,877 | 18   | 67   | United Kingdom      | 1924            | rabbit tissue                    | Rabbit       |
| SAMAE3138329     | Lmonocytogenes | Lmonocytogenes_EGD_e_169963                      | AL591824.1       | 2,944,528       | 37.98         | 1             | 0            | 2,875 | 18   | 67   | NA                  | NA              | NA                               | NA           |
| SAMAE3138952     | Lmonocytogenes | Lmonocytogenes_EGD_134565                        | HG421741.1       | 2,907,193       | 38            | 1             | 0            | 2,848 | 18   | 67   | NA                  | NA              | NA                               | NA           |
| SAMN01931119     | Lmonocytogenes | Lmonocytogenes_GFSAN00349_129895                 | CP046751.1       | 2,946,138       | 37.97         | 1             | 0            | 2,846 | 19   | 63   | Canada              | 2016            | organic chow spinach             | Food         |
| SAMN0486631      | Lmonocytogenes | Lmonocytogenes_ATCC_19117_882095_str1            | CP013288.1       | 2,950,820       | 37.99         | 1             | 0            | 2,844 | 18   | 67   | USA                 | 1961            | USA                              | Sheep        |
| SAMAE2271997     | Lmonocytogenes | Lmonocytogenes_ATCC_19117_882095                 |                  |                 |               |               |              |       |      |      |                     |                 |                                  |              |

|                |                 |                             |            |           |       |   |   |       |    |    |                |      |                                   |              |
|----------------|-----------------|-----------------------------|------------|-----------|-------|---|---|-------|----|----|----------------|------|-----------------------------------|--------------|
| SAMN14261987   | L.monocytogenes | L.monocytogenes_1639_str179 | CP076051.1 | 2,875,161 | 37.9  | 1 | 0 | 2,831 | 6  | 66 | Norway         | 2007 | Environment                       | Environment  |
| SAMN25653832   | L.monocytogenes | L.monocytogenes_1639_str178 | CP092057.1 | 2,879,234 | 38.01 | 1 | 0 | 2,777 | 18 | 67 | Canada         | 2018 | Sunflower Microgreens             | Food         |
| SAMN14260727   | L.monocytogenes | L.monocytogenes_1639_str177 | CP075871.1 | 2,884,293 | 37.91 | 1 | 0 | 2,815 | 6  | 66 | Norway         | 2007 | Environment                       | Environment  |
| SAMN16822871   | L.monocytogenes | L.monocytogenes_1639_str176 | CP065028.1 | 2,885,142 | 38.24 | 1 | 0 | 2,751 | 18 | 67 | USA            | 2014 | Environment                       | Sheep        |
| SAMN17320315   | L.monocytogenes | L.monocytogenes_1639_str175 | CP068599.1 | 2,886,896 | 38.02 | 1 | 0 | 2,815 | 18 | 67 | South Korea    | 2018 | brain                             | Goat         |
| SAMN25653833   | L.monocytogenes | L.monocytogenes_1639_str174 | CP092056.1 | 2,890,028 | 38.01 | 1 | 0 | 2,776 | 18 | 67 | Canada         | 2018 | Spring Pea Microgreens            | Food         |
| SAMN06681248   | L.monocytogenes | L.monocytogenes_1639_str173 | CP020774.1 | 2,892,474 | 38.05 | 1 | 0 | 2,794 | 18 | 67 | Uruguay        | 2016 | blood and lung culture            | Homo sapiens |
| SAMN19669079   | L.monocytogenes | L.monocytogenes_1639_str172 | CP076644.1 | 2,893,649 | 38.2  | 1 | 0 | 2,799 | 18 | 67 | USA            | 2014 | liver                             | Cow          |
| SAMN04452089   | L.monocytogenes | L.monocytogenes_1639_str171 | CP014790.1 | 2,952,246 | 38    | 1 | 1 | 2,873 | 18 | 67 | Italy          | 2015 | blood                             | Homo sapiens |
| SAMN09197734   | L.monocytogenes | L.monocytogenes_1639_str170 | CP029372.1 | 2,894,782 | 38.04 | 1 | 0 | 2,813 | 18 | 67 | Italy          | 2018 | blood                             | Homo sapiens |
| SAMN02839425   | L.monocytogenes | L.monocytogenes_1639_str16  | CP019167.1 | 3,115,752 | 37.95 | 1 | 1 | 3,079 | 18 | 67 | Canada         | 2008 | blood                             | NA           |
| SAMN02713648   | L.monocytogenes | L.monocytogenes_1639_str169 | CP007687.1 | 2,896,586 | 38.05 | 1 | 0 | 2,817 | 18 | 67 | USA            | 2011 | human clinical isolate            | Homo sapiens |
| SAMN13341946   | L.monocytogenes | L.monocytogenes_1639_str168 | CP046362.1 | 2,896,666 | 37.95 | 1 | 0 | 2,803 | 18 | 67 | Switzerland    | 2015 | septic hip prosthetic joint fluid | Homo sapiens |
| SAMN02713647   | L.monocytogenes | L.monocytogenes_1639_str167 | CP007689.1 | 2,897,190 | 38.02 | 1 | 0 | 2,815 | 18 | 67 | USA            | 2010 | Human clinical case               | Homo sapiens |
| SAMN13341854   | L.monocytogenes | L.monocytogenes_1639_str166 | CP046361.1 | 2,897,260 | 37.96 | 1 | 0 | 2,804 | 18 | 67 | Switzerland    | 2010 | Hip prosthetic joint fluid        | Homo sapiens |
| SAMN02347435   | L.monocytogenes | L.monocytogenes_1639_str165 | CP020832.1 | 2,897,335 | 38.05 | 1 | 0 | 2,820 | 18 | 67 | USA            | NA   | NA                                | NA           |
| SAMN10391004   | L.monocytogenes | L.monocytogenes_1639_str164 | CP036112.1 | 2,899,315 | 38.04 | 1 | 0 | 2,797 | 18 | 67 | Switzerland    | 2007 | brain                             | Cattle       |
| SAMN03255437   | L.monocytogenes | L.monocytogenes_1639_str163 | CP030102.1 | 2,935,398 | 38    | 1 | 1 | 2,826 | 18 | 67 | USA            | 2002 | water                             | Environment  |
| SAMEA104569033 | L.monocytogenes | L.monocytogenes_1639_str162 | LT985474.1 | 2,900,890 | 38.04 | 1 | 0 | 2,798 | 18 | 67 | NA             | NA   | NA                                | NA           |
| SAMN17320316   | L.monocytogenes | L.monocytogenes_1639_str161 | CP068600.1 | 2,901,393 | 38.04 | 1 | 0 | 2,798 | 18 | 67 | South Korea    | 2018 | NA                                | Bos taurus   |
| SAMN19267648   | L.monocytogenes | L.monocytogenes_1639_str160 | CP076127.1 | 2,901,641 | 38.04 | 1 | 0 | 2,802 | 18 | 67 | South Korea    | 2017 | NA                                | Goat         |
| SAMN02689388   | L.monocytogenes | L.monocytogenes_1639_str15  | CP011398.2 | 3,108,102 | 37.91 | 1 | 1 | 3,091 | 18 | 67 | USA            | 2014 | green chili                       | NA           |
| SAMN03073546   | L.monocytogenes | L.monocytogenes_1639_str159 | CP010346.1 | 2,904,228 | 38.03 | 1 | 0 | 2,814 | 18 | 65 | Italy          | 2009 | cephalorachidian fluid            | Food         |
| SAMN03177401   | L.monocytogenes | L.monocytogenes_1639_str158 | CP009897.1 | 2,904,500 | 38.04 | 1 | 0 | 2,806 | 18 | 67 | China          | 2011 | NA                                | Sheep        |
| SAMN02689320   | L.monocytogenes | L.monocytogenes_1639_str157 | CP007492.1 | 2,904,662 | 38.04 | 1 | 0 | 2,808 | 18 | 67 | USA            | 2014 | food                              | Food         |
| SAMN09692985   | L.monocytogenes | L.monocytogenes_1639_str156 | CP041211.1 | 2,986,335 | 38.02 | 1 | 1 | 2,918 | 18 | 67 | USA            | 2018 | NA                                | NA           |
| SAMN03483332   | L.monocytogenes | L.monocytogenes_1639_str155 | CP013723.1 | 2,905,347 | 38.06 | 1 | 0 | 2,844 | 18 | 67 | Switzerland    | 2009 | blood                             | Homo sapiens |
| SAMN04387840   | L.monocytogenes | L.monocytogenes_1639_str154 | CP013919.1 | 2,905,533 | 37.96 | 1 | 0 | 2,841 | 15 | 58 | Italy          | 2008 | blood                             | Homo sapiens |
| SAMN02769705   | L.monocytogenes | L.monocytogenes_1639_str153 | CP020830.1 | 2,905,307 | 38.05 | 1 | 0 | 2,839 | 18 | 67 | USA            | 1988 | blood                             | Homo sapiens |
| SAMN02318985   | L.monocytogenes | L.monocytogenes_1639_str152 | CP007602.2 | 2,906,670 | 38.03 | 1 | 0 | 2,813 | 18 | 67 | USA            | 2013 | cheese                            | Food         |
| SAMN03255438   | L.monocytogenes | L.monocytogenes_1639_str151 | CP026043.1 | 2,906,671 | 38.03 | 1 | 0 | 2,813 | 18 | 67 | USA            | 2013 | cheese                            | Environment  |
| SAMN02713641   | L.monocytogenes | L.monocytogenes_1639_str150 | CP007684.1 | 2,907,486 | 38    | 1 | 0 | 2,831 | 18 | 67 | USA            | 2011 | human host                        | Homo sapiens |
| SAMN03007779   | L.monocytogenes | L.monocytogenes_1639_str14  | CP014252.2 | 3,105,523 | 38.02 | 1 | 1 | 3,037 | 18 | 67 | USA            | 2014 | fire pearl white nectarine        | NA           |
| SAMEA10450418  | L.monocytogenes | L.monocytogenes_1639_str149 | LR134397.1 | 2,908,229 | 38.01 | 1 | 0 | 2,849 | 18 | 67 | United Kingdom | 1924 | Mesenteric lymph gland            | Pig          |
| SAMN10745353   | L.monocytogenes | L.monocytogenes_1639_str148 | CP035187.1 | 2,908,718 | 38.03 | 1 | 0 | 2,823 | 18 | 67 | Switzerland    | 2016 | blood                             | Homo sapiens |
| SAMN15862383   | L.monocytogenes | L.monocytogenes_1639_str147 | CP060526.1 | 2,999,149 | 38.01 | 1 | 1 | 2,912 | 18 | 67 | USA            | 2008 | NA                                | NA           |
| SAMN25653828   | L.monocytogenes | L.monocytogenes_1639_str146 | CP092061.1 | 2,910,079 | 37.98 | 1 | 0 | 2,797 | 18 | 67 | Canada         | 2014 | Bean Sprouts                      | Food         |
| SAMN08939842   | L.monocytogenes | L.monocytogenes_1639_str145 | CP029175.1 | 2,911,466 | 37.98 | 1 | 0 | 2,811 | 18 | 67 | South Korea    | 2012 | blood                             | Homo sapiens |
| SAMN03372623   | L.monocytogenes | L.monocytogenes_1639_str144 | CP011004.1 | 2,911,639 | 38.06 | 1 | 0 | 2,805 | 18 | 67 | Switzerland    | 2014 | blood                             | Homo sapiens |
| SAMN02351401   | L.monocytogenes | L.monocytogenes_1639_str143 | CP020831.1 | 2,912,199 | 38    | 1 | 0 | 2,812 | 18 | 67 | USA            | 2013 | blood                             | NA           |
| SAMN19267651   | L.monocytogenes | L.monocytogenes_1639_str142 | CP076626.1 | 2,912,248 | 38.06 | 1 | 0 | 2,806 | 18 | 67 | South Korea    | 2019 | tissue                            | Goat         |
| SAMN17036357   | L.monocytogenes | L.monocytogenes_1639_str141 | CP067362.1 | 2,913,085 | 38.01 | 1 | 0 | 2,799 | 18 | 67 | South Korea    | 2016 | NA                                | Goat         |
| SAMEA104314690 | L.monocytogenes | L.monocytogenes_1639_str140 | LT985475.1 | 2,913,696 | 38.06 | 1 | 0 | 2,806 | 18 | 67 | NA             | NA   | NA                                | Goat         |
| SAMN02689388   | L.monocytogenes | L.monocytogenes_1639_str13  | CP045749.1 | 3,094,088 | 37.93 | 1 | 1 | 3,065 | 18 | 67 | USA            | 2014 | green chili                       | Food         |
| SAMN06297510   | L.monocytogenes | L.monocytogenes_1639_str139 | CP019616.1 | 2,913,947 | 37.99 | 1 | 0 | 2,823 | 16 | 59 | Canada         | 2009 | Baby spinach                      | Food         |
| SAMN19267647   | L.monocytogenes | L.monocytogenes_1639_str138 | CP076126.1 | 2,915,057 | 38.07 | 1 | 0 | 2,806 | 18 | 67 | South Korea    | 2016 | tissue                            | Goat         |
| SAMN10148429   | L.monocytogenes | L.monocytogenes_1639_str137 | CP032672.1 | 2,915,525 | 38.07 | 1 | 0 | 2,806 | 18 | 67 | USA            | 2014 | cervico-vaginal swab              | Cattle       |
| SAMN02569973   | L.monocytogenes | L.monocytogenes_1639_str136 | CP011397.1 | 2,918,170 | 38    | 1 | 0 | 2,857 | 18 | 67 | NA             | NA   | NA                                | NA           |
| SAMN02997429   | L.monocytogenes | L.monocytogenes_1639_str135 | CP009242.1 | 2,918,502 | 38.15 | 1 | 0 | 2,861 | 20 | 72 | Australia      | 1985 | NA                                | Ovis aries   |
| SAMN06297525   | L.monocytogenes | L.monocytogenes_1639_str134 | CP019620.1 | 2,922,011 | 37.99 | 1 | 0 | 2,835 | 17 | 66 | NA             | 2006 | Environment swab                  | Environment  |
| SAMN03483333   | L.monocytogenes | L.monocytogenes_1639_str133 | CP013722.1 | 2,927,751 | 38    | 1 | 0 | 2,841 | 18 | 67 | Switzerland    | 2009 | blood                             | Homo sapiens |
| SAMN19696832   | L.monocytogenes | L.monocytogenes_1639_str132 | CP076691.1 | 2,983,560 | 38.04 | 1 | 0 | 2,860 | 18 | 67 | USA            | 2014 | liver                             | Horse        |
| SAMN06297605   | L.monocytogenes | L.monocytogenes_1639_str131 | CP019625.1 | 2,929,632 | 38.01 | 1 | 0 | 2,872 | 17 | 67 | NA             | 2002 | Environment sponge                | Environment  |
| SAMN13191635   | L.monocytogenes | L.monocytogenes_1639_str130 | CP045972.1 | 2,989,366 | 37.93 | 1 | 1 | 2,927 | 18 | 67 | Australia      | 2009 | NA                                | Homo sapiens |
| SAMN07718437   | L.monocytogenes | L.monocytogenes_1639_str12  | CP023752.1 | 3,116,331 | 37.99 | 1 | 1 | 3,085 | 18 | 67 | Finland        | 1995 | food product                      | Environment  |
| SAMN02713668   | L.monocytogenes | L.monocytogenes_1639_str129 | CP007686.1 | 2,932,501 | 38.04 | 1 | 0 | 2,808 | 18 | 67 | USA            | 2011 | human clinical isolate            | Homo sapiens |
| SAMN05363481   | L.monocytogenes | L.monocytogenes_1639_str128 | CP016629.1 | 2,935,033 | 37.99 | 1 | 0 | 2,835 | 18 | 67 | South Korea    | 2014 | Lettuce                           | Food         |
| SAMN10148451   | L.monocytogenes | L.monocytogenes_1639_str127 | CP036691.1 | 2,935,335 | 37.98 | 1 | 0 | 2,870 | 18 | 67 | USA            | NA   | abortion case                     | Cattle       |
| SAMN08939835   | L.monocytogenes | L.monocytogenes_1639_str126 | CP031141.1 | 2,935,813 | 38    | 1 | 0 | 2,828 | 18 | 67 | South Korea    | 2017 | blood                             | Homo sapiens |
| SAMEA104314691 | L.monocytogenes | L.monocytogenes_1639_str125 | LT985476.1 | 2,935,970 | 37.93 | 1 | 0 | 2,853 | 18 | 68 | NA             | NA   | NA                                | NA           |
| SAMN10148454   | L.monocytogenes | L.monocytogenes_1639_str124 | CP032668.1 | 2,936,760 | 38.06 | 1 | 0 | 2,839 | 18 | 67 | USA            | NA   | abortion case                     | Cattle       |
| SAMN03002784   | L.monocytogenes | L.monocytogenes_1639_str123 | CP045748.1 | 2,939,705 | 37.98 | 1 | 0 | 2,841 | 18 | 66 | USA            | 2014 | peach                             | Food         |
| SAMN03002785   | L.monocytogenes | L.monocytogenes_1639_str122 | CP045747.1 | 2,939,729 | 37.98 | 1 | 0 | 2,839 | 18 | 67 | USA            | 2014 | peach                             | Food         |
| SAMN03002789   | L.monocytogenes | L.monocytogenes_1639_str121 | CP045746.1 | 2,939,732 | 37.98 | 1 | 0 | 2,839 | 18 | 67 | USA            | 2014 | peach                             | Food         |
| SAMN03002788   | L.monocytogenes | L.monocytogenes_1639_str120 | CP045745.1 | 2,939,733 | 37.98 | 1 | 0 | 2,841 | 18 | 66 | USA            | 2014 | peach                             | Food         |
| SAMN08663437   | L.monocytogenes | L.monocytogenes_1639_str11  | CP028183.1 | 3,124,949 | 37.91 | 1 | 1 | 3,083 | 18 | 67 | Denmark        | 2015 | smoked fish                       | Meat         |
| SAMN03002783   | L.monocytogenes | L.monocytogenes_1639_str119 | CP012012.1 | 2,939,733 | 37.98 | 1 | 0 | 2,840 | 18 | 67 | USA            | 2014 | peach                             | Food         |
| SAMN25653829   | L.monocytogenes | L.monocytogenes_1639_str118 | CP092060.1 | 2,939,920 | 37.98 | 1 | 0 | 2,840 | 18 | 67 | Canada         | 2015 | Chopped Romaine Lettuce           | Food         |
| SAMN06297603   | L.monocytogenes | L.monocytogenes_1639_str117 | CP019623.1 | 2,940,913 | 37.91 | 1 | 0 | 2,870 | 16 | 58 | NA             | 2007 | chicken breast                    | Meat         |
| SAMN07612368   | L.monocytogenes | L.monocytogenes_1639_str116 | CP023321.1 | 2,941,868 | 37.99 | 1 | 0 | 2,870 | 18 | 67 | India          | 2016 | blood                             | Homo sapiens |
| SAMN0486628    | L.monocytogenes | L.monocytogenes_1639_str115 | CP013285.1 | 2,942,510 | 37.99 | 1 | 0 | 2,849 | 18 | 67 | United Kingdom | 1961 | England                           | Chicken      |
| SAMN13973245   | L.monocytogenes | L.monocytogenes_1639_str114 | CP048400.1 | 2,942,932 | 37.98 | 1 | 0 | 2,893 | 18 | 67 | USSR           | 1952 | Kazakhstan                        | Tick         |
| SAMN02203122   | L.monocytogenes | L.monocytogenes_1639_str113 | CP006592.1 | 2,943,218 | 37.99 | 1 | 0 | 2,845 | 14 | 58 | USA            | 1989 | animal                            | NA           |
| SAMN17320319   | L.monocytogenes | L.monocytogenes_1639_str112 | CP068601.1 | 2,945,237 | 38.01 | 1 | 0 | 2,870 | 18 | 67 | South Korea    | 2019 | NA                                | Goat         |
| SAMN16231355   | L.monocytogenes | L.monocytogenes_1639_str111 | CP062141.1 | 2,996,205 | 37.97 | 1 | 1 | 2,888 | 18 | 67 | USA            | 1983 | NA                                | NA           |
| SAMN02713644   | L.monocytogenes | L.monocytogenes_1639_str110 | CP076851.1 | 2,997,686 | 37.98 | 1 | 0 | 2,908 | 18 | 67 | USA            | 2018 | human clinical case               | Homo sapiens |
| SAMN06297602   | L.monocytogenes | L.monocytogenes_1639_str10  | CP019622.1 | 3,070,031 | 38.03 | 1 | 0 | 3,046 | 17 | 68 | NA             | 2007 | Ground beef                       | Meat         |
| SAMN02712416   | L.monocytogenes | L.monocytogenes_1639_str109 | CP007688.1 | 2,947,477 | 37.98 | 1 | 0 | 2,898 | 18 | 67 | USA            | 2009 | human clinical case               | Homo sapiens |
| SAMN14927919   | L.monocytogenes | L.monocytogenes_1639_str108 | CP053478.1 | 2,949,231 | 38.01 | 1 | 0 | 2,884 | 18 | 67 | USA            | 2002 | food                              | Food         |
| SAMN04286632   | L.monocytogenes | L.monocytogenes_1639_str107 | CP013289.1 | 2,950,749 | 37.99 | 1 | 0 | 2,852 | 18 | 67 | NA             | NA   | NA                                | NA           |
| SAMN05291439   | L.monocytogenes | L.monocytogenes_1639_str106 | CP018148.2 | 2,950,780 | 37.99 | 1 | 0 | 2,844 | 18 | 67 | Russia         | 2005 | Myodes rufocanus                  | NA           |
| SAMN11056493   | L.monocytogenes | L.monocytogenes_1639_str105 | CP040986.1 | 2,950,983 | 37.99 |   |   |       |    |    |                |      |                                   |              |
