# Supplementary material for: Comparative Genomics Reveal the Utilization Ability of Variable Carbohydrates as Key Genetic Features of Listeria Pathogens in Their Pathogenic Lifestyles
Source: Pathogens. 2022 Nov 28;11(12):1430. doi: 10.3390/pathogens11121430 (PMC9784484; doi:10.3390/pathogens11121430)
Supplement: Supplementary file 1 [file pathogens-11-01430-s001.zip]

Archive with 8 entries (8 files):
- pathogens-1990707-supplementary/Supplymentary Figures S1.pdf
- pathogens-1990707-supplementary/Supplymentary Tables S1.pdf
- pathogens-1990707-supplementary/Supplymentary Tables S2.pdf
- pathogens-1990707-supplementary/Supplymentary Tables S3.pdf
- pathogens-1990707-supplementary/Supplymentary Tables S4.pdf
- pathogens-1990707-supplementary/Supplymentary Tables S5.pdf
- pathogens-1990707-supplementary/Supplymentary Tables S6.pdf
- pathogens-1990707-supplementary/Supplymentary Tables S7.pdf
